# Supplementary material for: Research on Recommendation Algorithm of Joint Light Graph Convolution Network and DropEdge
Source: Hindawi journal article supplement (doi:10.1155/2022/3843021), 2022-01-27
Supplement: f1 [file 3843021.f1.zip]

Archive with 10 entries (10 files):
- 3843021.f1/amazon-test.txt
- 3843021.f1/amazon-train.txt
- 3843021.f1/gowalla-test.txt
- 3843021.f1/gowalla-train.txt
- 3843021.f1/run-amazon_book.txt
- 3843021.f1/run-gowalla (1).txt
- 3843021.f1/run-yelp2018 (1).txt
- 3843021.f1/Supplementary Description.docx
- 3843021.f1/yelp-test.txt
- 3843021.f1/yelp-train.txt
