# Supplementary material for: Research on Recommendation Algorithm of Joint Light Graph Convolution Network and DropEdge
Source: Hindawi journal article supplement (doi:10.1155/2022/3843021), 2022-01-27
Supplement: f1 [file 3843021.f1.zip › 3843021.f1/amazon-test.txt]

0 7202 114 5612 27640 15533 194 40433 7540 537 373 10946 6914 12303 7833
1 10228 5102 18048 15321 23380 9758 429 13525 787 6875 8132 27476 41875 15350 27534 11257 16453 24458 16404 9755 1115 6830 15735 43786 16520 62094 10214 660 14661 25235 16096 10722 27587 7070 838 45135 824 40555 38243 36524 3785 25117 19753 23747 26254 49772 4770 26844 56311 17 7986 43 5653 10798 27684 34187 35069 48 43281 28925 721 24965 10806 5595 22032 978 22061 1320 27667 38 3075 7198 8766 684 3086 34894 6756 670 5448 10796 29241 7200 10807
2 23885 23764 42923 37570 28855 21469 655 29837 5599 10703 73 8828
3 19898 50333 33067 16440 22536 18082 52361 11776 18217 28793 22695 27423 3548 16589 21543 854 15720 7058 23486 42484 42491 18468 15766 8841 36242 5505 22026 12469 215 37016 22062 7829 8072 34824 1795 1849 8843 7213
4 25178 2891 30073 6075 3526 5289 36798 33945 31780 31219 32210 33557
5 25193 7211 6509 5398 3353 1355 1438 30832 22984 7770 29976 1200 33137 29528 35507 38253 8526 6827 7995 1658 679
6 23074 24410 1072 1445 22032 646 5597 24119 85 14
7 7642 9360 12409 9404 9341
8 41572 10130 81631 27072 44691 45583 7224 551 684 28971 8090
9 7942 45867 64601 29497
10 29148 25154 24664 26458 4411 39436 7903 2203 35749 39578 38184 4271 33454 56650 22726 40003 42481 48343 38822 39885 39811 11151 40017 39850 39617 10404 39892 10903 40137 22842 40048 36738 3259 40093 40247 45866 46508 40237 42020 59370 3713 23648 42266 35084 38575
11 5491 15258 28644 91122 17166 34401
12 1069 37653 10864 7331 24124 6506
13 26904 1816 26907 10027 66160 24416
14 1295 1140 1146 364 6120 12791 11795 28867 3730 1845 6066 4829 12567 40762
15 49151 54307 30753 22357 26260 4107 22610 32787 12789 34683 33707 30792 27070 12837 32093 46315 41272 41159 23813 1762 40682 28636 81266 37414 44165 5203 11168 40070 1364 46204 9465 48605 78317 5252 46559 50226 47635 40099 57009 31400 35206 43068 6942 86839 32398 6246 59368 47250 34106 80865 36268 32399 2441 11871 45583 15265 89899 23843 6456 38 29630 7228 6493 33558 36206 41345 3990 33553 36997 554 648 967 1006
16 12021 120 22313 606 37504 26275 12775 26756 5262 31319 659 5371 31234 27436
17 1042 23064 21627 11900 7241
18 11564 34384 395 31612 7011 7008 10874 1029 8428 7856 11635 366
19 1633 30771 31501 31500 11296 1650 1364 1658 6030 1180 1361 30379 1664 1648 23986
20 68542 35856 46340 56232 87567 63646 76391 33523 12279 6554 11755 7975
21 382 5621 31924 10446 39253 27682 23749 5789 31138 41539 6580 24702 27286 5817 36610 23998 44738 37662 27771 10452 38918 6581
22 8886 3353 8897 691 1104 7220 5976 1112 1004 32625 1062 8437 30660 11296 11308 5470 12164 24140 7774 26612 1452 1106 26734 5436 23217 6539 8017 1448 7790 6030 26736 24915 26646 12171 6499 1446 527 24145 5337 11204 1111 11631 24891 1349 26737 5432 8867 11661 3670 1120 8131
23 6200 27217 24675 6228 41430 546 37101 32680 12257 41864 33537 37486 373 27228 37698 29210 769 33721 30 1616 6929 23891 8354 6506
24 33278 37108 18985 56676 19047 53116 37459 19008 65345 46066 19125 52354 40982 54184 27630 905 34575 45478 57299 65056 9261 11072 32985 12985 18819 12111 30752 19025 19018 30603 14545 18625 36715 36126 56855 6161 59499 27282 37105 13138 32114 68311 28724 18968 19296 6837 1233 24566 46670 61658 19127 64969 38767 53584 50570 40720 19827 6957 77406 22410 45161 63266 62900 23918 27460 35760 52137 23532 55471 58420 27287 69508 50170 41690 23869 19123 45092 57279 28236 19262 4736 34879 10057 58234 23113 18901 33217 43030 11507 27620 23525 4737 33996 19151 27821 35264 18952 48739 32641 40665 57225 10291 51780 57176 28238 27009 40820 11543 45999 31690 68562 73878 60841 48990 58229 36924 37040 81099 53930 57447 25893 62569 80933 50214 68557 60528 51640 58447 56702 73666 36694 62890 47616 78401 7846 29999 61807 36591 13672 7103 1365 5867 19147 5233 19181 50207 6158 32857 20574 37111 1299 31199 41358 19328 18660 12980 43790 31693 41568 40643 5240 36544 42656 19274 59981 11493 43443 19280 43724 56773 24548 43045 19250 19294 12255 19295 19259 74636 27627 31688 1867 28691 41567 31687 8088 28876 36967 11081 20577 4744 19269 11498 19169 38807 20268 10306 5249 49133 49093 19617 48532 24590 19562 58439 19653 34033 31268 64253 59917 77850 58748 24575 66437 41128 7085 82874 7460 9283 1624 23520 5256 19086 12282 12354 19318 29382 19189 45937 9262 19598 58693 49793 46265 51493 56189 22483 19249 875 38047 55091 50340 26337 21966 11521 35983 37682 32100 36390 27458 5873 22250 20907 19042 19499 19500 19501 41668 33527 19175 52597 42636 12713 26613 33078 58188 37026 30705 19199 19187 5253 19399 35073 46671 43815 30342 58021 38813 19550 47254 61055 49030 55643 23747 78835 61415 22420 43852 61143 36928 47786 12712 78817 19479 62145 72395 53572 55930 61392 66710 51894 22917 73667 34173 32618 24132 53728 36958 12115 35423 32883 31915 23146 23955 27794 46510 22013 30900 10566 46602 35984 50252 30904 19644 55290 18672 46019 38811 41693 53295 32318 46276 74689 7102 42785 9269 34583 40570 43232 50241 12998 23551 22425 26948 10567 7965 57205 42228 42030 19622 43779 52151 13153 30903 8578 24605 4749 10024 48852 34679 34010 22423 23871 37379 4745 57180 27048 12355 40566 28690 4750 37114 19081 35658 11473 19443 51992 66450 47760 7087 37115 35162 11501 51494 31202 40392 44604 5880 19447 37045 47181 19497 41132 33581 45644 40804 4864 19445 19446 52541 28873 42149 38772 80681 79348 66438 43308 7462 48089 45145 22424 73236 61662 24580 67609 40459 23522 9272 31985 40940 1267 21407 26342 19768 19425 26949 69645 19615 19706 35269 41221 10305 26838 55106 29196 44659 51852 19616 40555 19421 26116 40941 32373 29911 23494 12356 19551 19485 19565 19539 5251 1863 58452 1253 28550 51364 46059 19731 28429 19704 43667 53280 48019 35408 8801 5948 9471 34349 57611 23521 8416 49819 19564 19608 41192 19834 10299 33579 31566 58827 80682 40310 37674 8332 31775 59089 36908 33142 32608 27260 21959 395 22359 25034 5593 43103 114 26925 10588 34073 32231 32858 612 36822 23061 26523 24141 9151 24139 8443 9155 42541 25033 1555 8592 29816 29597 978 1234 48243 4890 27522 9043 7192 26062 10006 23000 38402 38920 700 8404 43037 35104 33980 6609 6084 23301 5699 41529 43272 29872 37634 6022 6094 6454 6909 13064 37660 26576 72985 35286 38359 6827 34406 23845 8504 28619 24843 24919 49820 23424 662 28066 27682 8738 7185 22995 134 24967 34826 59483 28362 33316 4794 1667 1551 5736 48721 32156 49736 10951 27883 1407 22364 23830 6576 10857 31926 22988 25041 37077 1040 26277 22048 35204 38587 22070 40789 39093 52733 6083 5618 4793 6961 25465 59450 33925 9308 41330 29654 28436 22365 43918 32434 41203 5379 5387 717 35393 25009 47012 9336 21892 6365 31333 24288 10409 23665 24085 22170 1042 12224 21643 28647 42658 26578 12504 9200 46675 7035 31309 12862 30732 8483 23837 8780 28654 28105 9346 23664 7242 5203 15882 28152 50059 28404 7803 32234 26805 26886 40294 42540 28136 26266 10466 5483 28129 12060 12484 28600 9334 10279 33916 9357 7244 6987 30721 9306 27132 1180 36769 11300 32249 31780 28461 23716 12195 46157 13077 10931 31002 12004 5661 615 10861 28212 379 9366
25 29381 30939 50371 44773 11579 59234 59596 72423 26970 29135 11121 26976 33596 22309 22302 35052 36849 33599 24795 30809 46760 39503 35739 21595 38824 44775 44193 56737 39543 72015 42691 84921 70492 60294 32384 52710 58323 38454 88565 46613 75006 36498 40123 62214 7288 5483 7242 9346 8526 8479 26738 558 10843 9359 23837 23844 5308 551 8346 31778 1428 9357 579 1887 631 2077 6014 1964 23716 10859 41609 7230 7232 570 5475
26 8019 28369 29447 7042 21502 13093
27 39846 11163 7234 1798 7735 13060 7243 37754 7734 29509 31878 6929 32860 44760 8427 6167 437 37748 32989 9345 21632 25047 6275 9558 10871 33946 7129 5927
28 12752 6817 29724 10255 23747 33001 26336 31979 42710 8488 25115 30609 7311 56323 397 13016 19938 19868 13021 54970 21617 1665 19986 27484 774 57391 36971 28494 23551 20111 26122 6830 57212 29891 52959 11532 20007 527 25117 26132 20465 26130 1743 20462 5784 20148 10331 54259 26138 20649 43293 29892 11883 26139 35844 13027 20670 30305 26141 43098 22478 20916 13025 65475 5966 57386 1585 28409 6813 6909 28056 395 7450 25144 379 648 6528 29560 382 25228 7856 6317 27364 38315 17 35254 12306 29875 6728 24778 104 7514 23106 28063 28061 6906 9321 26647 37766 11873 33849 30570 5588 8887 10 54369 32417 38148 24163 48812 2923 1 24766 30837 28049 34161 7501 3353
29 24103 33929 23360 32298 24470 27574 11754 32325 28511 37769 1935 4205 31194 23741 42169 38309 47841 11591 36812 11663 1083 37774 7289 24366 23830
30 691 5719 1042 1069 21807 8310 40338 21 4886 44 4893 5481 5475 33131 28446 1006 628 8013 5575 379 23186 8002 8040 26698 7745 103 1435 8004 25343 27027 654 983 6667 23184 8586 24635 26473 12133 6315 12855 10986 29840 14 187 9510
31 5061 4997 2964 29733 5095 6872 40447 42209 36081 34873 3413 3877 1435 635 26513 8801 5453 679 12405 7153 27090 24948 7726 30357 40908 8557 11651 23872 662 7139 7227 8433 23174 12025 33993 10707
32 3085 12402 21845 21846 8598 27913 58077 7500 9056 48 31607 9055 25199 27695
33 15468 28474 1539 1798 668
34 9813 9829 7506 9133 2774 9878 150
35 10829 373 17 967 38 23972 7995 14
36 36981 30786 46427 36267 35906 10633 6263 26255 50826 32110 30349 6244 24665 43395 39409 22543 6250 44304 57558 46303 39437 6262 39444 30809 38191 39496 39495 7132 9008 32115 43397 6268 37919 26878 6269 47422 39494 11141 39642 44593 39669 39671 39701 39837 11844 32058 39990 39899 34813 42252 32762 21602 21599 39980 39807 25155 40057 37362 39188 39751 11852 593 36813 11858 65688 39979 42117 35492 11194 37364 57151 10910 39957 46446 39750 15088 7055 64604 42538 51632 28693 41419 27150 12619 114 7504 29569
37 4777 337 9009 10347 46074 16417 31569 10396 8268 12843 39703 37085 11832 35449 9018 53016 13040 49077 32058 34672 35558 37361 63683 39522 26261 44336 4879 59273 60819 13017 59649 13019 12897 9022 2221 33722 11852 32067 36498 64613 42254 27720 45375 40021 40070 40094 40045 32064 8271 40231 35492 47823 14784 27794 29959 50480 59356 37434 54183 73190 90615 11863 71276 11858 35571 62415 55179 91380 36277 82158 29741 35570 11847 26687 32773 48986 1806 22059 978 2068 9309 39061 28597 7243 8326 31938 1793 29506 11873 7486 8377 8845 33160 9311 29306 6538 6346 5308 33947 47393 25032 673 11948 5101 28575 7408 35204 12045 9336 25166 33946 36990 5463 36800 23789 34438 30033
38 13867 894 59268 877 35461 5358 11963 25244 24768
39 53376 22283 46409 5030 28120 8140 1027 20504 4681 27210 29433 2151 473 474 8192 1081 8402 30677 5050 43413 15649 15917 11908 50344 51168 8626 16799 8416 3543 30998 3579 28157 5837 4797 4914 1703
40 25276 11009 28695 52634 31835 34092 63797 30400 26473
41 29629 37073 29445 23742 34254 4957 36005 24080 10155 25053 32861 23072 28653 32779 23307 1621 974 24449 23035 36335 1713
42 5370 353 8282 13669 9035 138 257 6989 52 7984 31604 12111
43 13252 28187 4998 9348 4817 27145 1885 9686 2130 14196 13765 22228 24194
44 10867 21863 26800 24772 34961 6927 6995 28291 28287 24765 11278 24809 23149 30837 426 28290 5604 5605 7024 6877 33995 9422 42541 33910 29573 8071 34070 25215 29628 43164 36994 28257 28647 5431 28255 29813 956 12862 29637 30833 28056 11873 28294 7990 1537 42540 7410 23143 27746 27744 31551 1492 8757 5614 29000 6514 26073 24912 12402 24764 5821 427 12391 24807 972 709 31555 5411 8708 24813 23235 24148 5615 10832 26539 25324 29814 1565 24810 12409
45 121 12867 28863 7340 8970
46 34010 27211 45122 33721 89479 23036 24141
47 30202 42702 643 45424 7016 763 29756 38862 5652
48 17 24830 10814 7500 8747 10867 27745 721 954 7511 76 8257 6506 20 31326 32824 5405 9057 7856 28497 7212 1541 8437 23051 6618 12467 6614 5415 21814 5469 4894
49 12371 8261 6776 1806 1554 38452
50 77798 39413 1517 63658 26448 44778 26428 55531 1548 44371 13918 20684 46668 82531 55535 33836 57557 2521 38188 39465 935 38249 941 6898 51264 54278 47487 64945 50191 19970 11151 38251 42522 52894 46007 38331 46716 41153 150 191 32902 32904 32905 27664 34098 37565 21863 1492 35084 172 186 153 154 31308 27663 25352 34099 38998 31762 31604 32210
51 23382 3000 12570 34331 11441 2149 4188 11466 8584 32339 24569 23238 3386 10706 1924 23693 10690
52 30576 40888 677 5370 38 36818 8091 181 25214 40475 5590 22032 7405 22064 12306 7153 1069
53 5654 1405 9068 34403 41429 11631 7239 656 957 36569
54 32373 50666 9289 38306 22588 40712 57643 31059 39892 6184 32058 5695 37003 10085 22714 29177 50293 32065 22771 22483 47823 34216 34780 22669 73574 86823 31823 12266 11636 24246 23823 29430 35189 23806 8295 46104 28473 5678 24866 29569 9312 32184 32864 1382 26540 11776 29584 23876 8304 35099 24882 5973 8849 6060 25026 24435 4795 2287 22311 32233 29276 28602 1804 44549 23770 14 23771
55 22343 7212 30357 1110 40857 12775 729 7868 37442 47698 12434
56 394 1533 29971 25231 7856 6731 35597 25448 30999 22054 29824 11208 970 25041 5476 7243 37084 24929 5601 21988 1103 118 3038 12857 36133 10802 7225 35938 26593 23792 5445 650 9164 85 24501 23055 75 24437
57 4564 27531 38358 1870 21470 237
58 40329 21063 34405 51855 26542 70588 26035 53364 62643 60655 71860 48379 49378 56410 47993 24973 87510 25250 11942 11943 53954 27950
59 13289 9690 3134 9527 14047 67623 14125 3106 29670
60 9316 24673 1990 21468 36347
61 41258 10420 10427 9512 27834 29237 8552 61412 10470 44953 8697 21764 21789 18432 32452 36141 27904 8593
62 56196 34135 39960 68944 29964 44472
63 4626 5081 27767 1443 40524 41492 11692 23978 8054 30286 23998 10691 1 28678 649 33829 8893 32625 8550 1427 12489 31975 33807 29414 25055 631 5926 21476 34480
64 21760 11214 8099 11281 149 6442 11282 11265 10811 23828 11218 12123 10976 8074 10980
65 10767 51 52104 52 24 38963 32913 39105 11356 6492 10948
66 23654 45313 43425 6060 33739 10863 29990
67 2321 8550 8089 141 10951 57486 25134 181 17252 6972 5476 31203 27740 1585 86 27745 40424 31552 41581 26214 21875 21877 29875 9057 7982 10931 31094 6590 11200 975 40472 6623
68 25049 26612 29637 24807 5615 12378 36828 30832 5392 26537 30562 5431 46 27915 5370 5368 30524 27650 27788 9453 5378 619 21680 1871 10 1427 24849 5414 5821 6597 1428 6603 5437 28290 566 1413 6590 24859 7721 23649 5442 4936 24778 10169
69 29818 31925 181 12119 149 12126 10688 10865 7873 7793 106
70 18198 52555 48034 21447 28697 9827 5921 20841 49418 65652 36744 28768 64164 28994 10382 54934 33103 39210 76597 9955 20306 6900 38482 13016 31710 30996 30209 59647 39661 57736 31178 52978 77574 32689 45484 54930 23643 39963 77637 32531 51977 7964 33479 32404 30248 33511 1592 5605 1770 6877 111 6592 1435 6507
71 1500 13 374 29573 21 5101
72 24915 28227 118 29281 31517
73 8105 6933 7320 16767 64264 7726 7518
74 7009 34784 38300 44183 10830 439 46607 41666 33342 11488 21542 32279
75 5727 33987 11747 5923 417 11887 38462 656 28225 23123 44392 11916 41012 6336 23884 8896 6544 33989 10156 10692 36513 33951 21679 10703 6526 29836 21635 21672 10971 21650 38853 29828 395 2762 21956 29978 6360 5761 28293 28910 29832 27436 8261 17372 26754 6329 6328
76 26696 5968 27445 26513 24081 1180 602 29840 1368 5684 44685 6137 22025 1658 1373
77 10838 8826 7850 41588 38452
78 23357 32313 1643 10463 7776 42343
79 34667 10314 29530 1863 1015 30351 8421 13003 7732 10463 23779 42980 4534 23549 8407 24078 8410 28938 24891 28259 33585 37653 36163 40454 46161 8706 43794 646 22354 691 24260 29449 25383 49 567 11872 26738 5929 1356 12265 27724 669 31223 38535 5367 1642 1465 11296 438 9317 8420
80 12308 132 44953 30267 6590 21834 51385 6985 7994 5587 5384 40809 21846 12433 27165 1930 568 7785 26886 21488 49 483 21874 10422 41213 670 8092 34854 1604 7509 24014 5392 61412 26813 7721 21807 5422 1652 1428 21854 7489
81 1639 5607 23724 43338 21620 23727
82 16764 5110 30591 5676 6601 21824 12429 16205 38127 12109 3765 23486 8545 40856 28141 22200 4102 8183 16791 12677 1582 8022 5606 12419 21816 12396 6873 6880 32993 9048 21842 21818 6647 31295 21820 38036 30000 703 385 34894 150 30467 7491 56387 21821 47006 7021 31551 24764
83 1084 27150 105 21470 373 975 36206 28492 13 23790 187
84 1024 8221 43330 6189 53526 35201 9382 40428 114 6559 27445 28920 34416 37548 5934 1005
85 61239 76409 37361 39710 34019 22726 11845 22749 75916 35055 87476 32393 40021 36737 75918 40028 25459 22646 40137 59360 40256 59354 37434 71804 40030 35574 36815 33504 26694 33831 5931 24010 5654 388 1798 23787 6544 6524 22983 41560 29888 6525 11771 5925 31036 6006 34148 5489 40340 8354 5727 6334 8319 31053 33979 44637 8391 23730 29590 24996 23740 9366 37077 29019 7240
86 10932 29676 9075 8621 8633 7870 6949 483 29233 5434 5457 25123 9074 21769 29744 5336 12174
87 6969 80697 24993 48248 31955 6796 32130 36086 36908 36358 34087 42134 59771 40806 57517 8093 29371 27482 34090 49764 29239 70375 29819 62417 29818 72985 47698
88 34379 39164 55485 30797 50325 7889 43310 38480 26257 12744 32086 39365 43366 39324 32054 34610 37512 49151 32619 36561 39624 41555 40417 24668 4754 39815 33707 52466 3853 27062 7916 39626 33636 36083 80005 50480 8409 38473 42791 74916 45581 45584 670 33816 551 49 1916 975 4548 5467 32169 5375
89 6135 30096 626 24438 3333 3081 38304 6125 27767 14967 9932 3082 57265 23005 22099 37550 34006 3706 27651 6798 43867 23957 11628 40292 31774 8318 1794 8368 27211 1567 8345 7367 7845 17 31021 28597 21650 22068 28322 5973 7352 4798 27153 33821 4794 2688 59 6285 6358 13060 24855 4838 27213 28414 7336 7333 7243 23777 10926 32570 21621 22986 11932 4803 4827 45585 7139 6060 31775 35204 23829 23990 23778 47393 8550 29574
90 30206 14748 30241 61330 58121 13004 41262 28880 56419 90517 24011 29987 24811 4900 31409 6877 33127 31329 615 29874 5368 25324 24805 4981 5411 4936 5369 5442 35503 5378 26530
91 79504 72669 60300 16599 13571 31841 17615 17831 72659 18221 59537 18330 35748 52764 6889 26163 31839 32435 7568 21505
92 18328 18312 18543 18583 58219 18685 45320 18413 4449 6284 14855 14998 4436 6197 18773 53056 44089 4017 6157 18867 18739 17935 3438 36925 10613 4103 5875 18686 18518 19070 19061 34344 19199 1968 20268 4865 5873 12618 30224 19021 19469 18218 4282 19112 18936 28987 4863 19715 19306 19446 51154 6230 27182 19950 24854 644 19082 19691 58247 5866 30342 5303 22246 19640 8695 19706 51183 49810 29210 6191 10618 9475 20091 4866 6190 19757 20582 33067 18241 4134 20237 8267 30926 20458 4871 20490 8996 31681 21158 20955 20108 5911 11109 8239 31998 46714 5982 23543 20666 5913 21157 43490 5918 27353 26684 21038 30343 4873 6264 40950 40778 11591 11136 41631 32113 27795 57004 31862 11625 66397 37418 42216 50474 43264 32567 38988 10470 24758 36514 5729 34068 38922 38253 24837 8427 5977 24776 5376 24775 21471 5379 5386 22067 28273 9057 23305 21476 21501 30998 44387 36290 1558 41991 10932 5369 30390 8785 615 42372 8589 37348 8000 5726 5450 10933 4776 23660 12174
93 5711 14623 36426 33220 61246 41786 90997 84746 42524 27071 82475 80496 34396 90440 84745 36327 25822 46565 82944 90949 32792 22025 34410 32777 35077 5337 37435 34448 24864 7226 8444 1632 35944 26717 22989 12063 12143 46157 10984 7826 29002 31951 23046 22987 10874 7027 32793 10747 10707 27786 33042 31875
94 4728 30646 45802 39411 10703 28285 2439 1435 1403 12026 5453 10698 27019
95 33453 75688 32836 10139 10591 46768 39711 39850 39817 42218 33723 56196 72405 40021 39907 39993 37563 32067 7971 40045 40230 2372 45264 51301 47248 35566 34396 7927 40235 45866 40240 40099 39875 62982 11193 7964 47640 47637 27627 42365 58904 49160 44078 76848 90516 5103 29523 23708 24205 6603 6623 10714 1214 8072 8488 30440 46 10852 52 8108 29721 7386 24171 28953 29416 29694 1428 5435 239 278 48991 5414 10840 77 9422 27742 27027 1870 27746 10937 28315 30571 6518 10874 31312 34814 5588 13494
96 44322 34555 11151 39527 11157 33720 30851 45141 36301 39724 32747 26689 33384 33403 39670 39741 28993 69679 21170 24809 42232 28099 24938 39876 39938 33456 29960 35562 21858 26690 40052 20001 46234 22224 17460 29167 60483 39965 31716 24800 33458 62015 37426 40277 73874 54249 61181 76055 55594 11188 57294 14024 35497 71208 35686 46569 59599 50476 7964 29970 20451 69865 49161 39705 33476 33794 83766 57292 57293 26219 57290 10905 29212 11173 7974 56015 35056 30875 91121 42488 5420 5654 26720 41029 29449 5591 5633 8 118 32944 7770 1352 33809 25050 31223 7493 26180 24235 26183 23439
97 23008 11635 24858 28910 8526 29976 36855 46633
98 26876 31139 12260 21595 46472 32054 40381 3548 26688 32065 32392 46888 35059 77040 47638 84745 6448
99 10142 27445 1916 983 24171 26522 27860 24118 11208 24174 35069 50544 35673 8461 1911 4936 1485 24257 27791 12294 34165 11962 2721 31602 11959 7140 7153 33163 2842 41866 5445 44353 106 10176 22991 1868 12034 9163 3990 31895 35393 6666 6603 8794 9712 8428 30822 25297 42411 3385 27746 31782 31575 42498 5442 42544 1923 37094 6667 1269 8074 4894 71 13494 26826 5484
100 114 26707 373 24293 51506 10412 5738 8341 24299 29782 16562 43380 33851
101 7213 29665 22990 22312 3 1006
102 1868 208 6860 5411 1565
103 33 25316 7034 6906 7002 12467 47105 7833 22969 10 188 9028 18 31320
104 988 8248 28091 1496 27650 45098 28504
105 10986 22062 7797 12132 8074
106 7821 7826 31835 11264 12119 7827 34092 10985 149
107 39841 40053 42259 40129 41904 63335 43459 40191 40130 63685 51766 26691 88729 91121 37416 39918 35063 7974 26694 57161 40278 59383 12428 8368 34402 41776 21790 9496 36100 8633 26590 30389 25268 53954 29639 31721 6963 29642 37894 21485 29257 43989 7529 48411 42925 29237 24992 416 38999 21469 6953 10806 32130 10840 32156 483 26020 3 25123 7537
108 2283 73 5597 10796 61 57 27640 134 27135 241 12435
109 33784 8099 7828 10982 6438 25824 11874 10811 6442 7827 7798 149 12127 23828 10981 12125 10976 12126 12130 10980 29261 25328 7797 35703 106 7794 25569 8074 26526 10986
110 12130 10986 29264 25543 25328 6408 35924
111 5471 8437 27027 28442 7725 527 1452 23522 29829 28678 22956 1486
112 39561 39704 39991 35497 8851
113 12261 39927 72405 38981 10118 7355 40175 51888 39981 40177 40254 51303 40081 40948 7971 40135 40249 58873 59658 91187 41786 7954 10085 39997 32330 47249 35992 78796 46584 66685 59365 91555 7952 12259 32624 82266 82178 79364 72994 42261 78750 32336 61264 79359 41521 40308 77490 58904 82183 51338 43068 48425 89078 7241 7139 9319 22359 35099 34403 10706 23237 1425 23874 38048 10434 41334 24422 32958 5319 43272 47105 1042 38269 5287 32238 32236 51862 10173 23693 10707 28458 8319 30732 12230 41529 34557 10146 28886 1405 34816 43425 5960 28434 41527 6618 35624 48264 658 33739 41854 12215 34109 7503 12224 32966 7140 23645 32605 8092 32608 10873
114 1798 11932 23747 24672 4838 4803 37019 4826 1372 35747 1423 9345 22235 22229 32805 21617 1365 8407 32636 13151 35800 8410 8994 20715 890 6197 1445 33817 21149 11594 8194 10295 24624 1302 40712 40868 37559 24649 9006 23796 38449 45867 73786 37428 32398 43042 51677 44651 26175 12480 35891 669 8568 26751 4119 6404 6530 8325 2057 41773 24218 26735 1638 1062 1068 29895 1441 23743 23041 31030 1648 1793 1364 27658 30350 24208 37076 670 6802 27802 37944 1733 8837 1035
115 12128 8322 10071 427 5404 7410 395 11952 7809 28293 24946 27075 6299 8069 6676 22989 37076 7239 27732 22990 1405 31217 28884 5821 11717 10867 8785 551 33036 5442 35891 29417 24093 1916
116 35468 15436 14604 2910 15546 15333 16464 10217 2521 8264 5087 2892 15853 45567 15924 13350 1814 10247 24451 21669 4690 787 35528 6401 16499 16385 801 22374 21617 12780 7788 17384 10293 3637 12681 24490 19547 41592 31453 3991 43741 24441 33385 4515 6516 3921 54936 32952 3140 38514 28999 23868 38114 2569 6366 25389 29667 29900 12463 26482 45795 397 5113 1709 5199
117 32751 67611 50469 27423 24183 27114 23909 10409
118 36857 10152 3221 11645 7786
119 25464 4008 38842 42906 23528 41301 34617 31926 40913 35582 26758 45876 22983 36058 28215 5331 41426 26477 29689 28830 13065 40916 1392 5608 5612 32767 47845 5609 5611 5414 28051 32141 29775 41343 51165 29227 38062 26822 26473 24018 5345 1497 28910 34148
120 5466 29622 7822 11874 8273 11263 41484 11282 11266 8095 21759 8094 35703 7798 11265 11270 30400 11267 11264 40994 6437 7823
121 5117 34005 33738 17 38848 1006 8526 366 5475
122 24682 5703 1806 6297 21626 23995
123 22097 1746 5424 382 7243 1444 28829 23059 8836 1104 1483
124 6414 37054 39084 6961 28698 6911 8278 6922 9064 5692 32170 8540 8046 5248 6962 31308 7002 537
125 11421 22175 33374 3217 13110 2798 6156 37618 38105 36012 41591 40917 11560 41554 26628 42193 27469 26430 38194 32002 11609 55459 34216 5328
126 7938 22879 33156 24068 1234 10504
127 30417 38388 9 29971 6531 42708 17 7488 1380 5654 118 12028 8839 25351 1368 12480 75 10874 38 187 1424
128 195 5590 12460 7833 1870 74 25215 23990 43726 35958 77 42049 31925 7701 6961 7186 687 5404 61 152 27361 1773 12398 25344 429 105 8 5602 6914 6963 1868
129 27519 8006 6747 29987 27923 47221 708 31946 23710 32857 28999 8731 23707 5725 31607 28977 26586 8729 3085 1563 1555 5616 36102 644 27740 7979 12435 26160 29770 29366 5392 30870 7512 29765 151 27903 394 21863 24813 30182 25027 8051 172 6910 5400 956 10826 1603 48 186 563 427 395 6906 191 566 29771 1947 4936 7982 25197
130 36007 36008 23343 23276 36047 23336 8498 10839 8627 23333 44 26823 23234 38864 23338 24383 26821 12404 28114 10481 23340 4106 32896 1916 36006 106 27699 8766
131 52 34220 25162 25164 6856 7829 6603 86 239
132 1019 23630 5328 22063 1916 10937
133 12168 1675 12125 1787 30673 23 1664 26880 5277 7331 4956 1110
134 12768 7721 27658 11627 8742 28662
135 1183 44706 27604 4220 4259 4262 4452 11572 5188 28607 42748 37989 32373 13014 35720 38282 886 59535 30159 26353 61422 41161 70673 6174 10035 6177 46910 11330 41898 11568 50385 46425 18578 48154 54469 34955 11170 7447 5405 1059
136 6484 11202 10413 1364 56 8495 393 196 5466 7914 55 5643 119 1792 34266 81 25353
137 38787 40149 38528 45865 28203 42796 70539 35961 45876 5782 32966 33833 5937
138 39340 24651 39338 11825 32564 19210 22297 24598 13145 42178 4723 32508 39484 43573 35443 11819 38190 39368 30979 22304 39288 31276 38017 33453 39595 32382 32527 39735 37362 60483 75659 59903 46075
139 10458 42172 7632 36006
140 22283 21346 5557 47531 2322 38262 2738
141 39543 36561 30962 23643 11170 39865 33463 39738 39953 40101 40033 42525 40099 40274 59355 26692 35451 28644 82158 35571 35570 89246 11859 50652 91576 665 26720 29295
142 30710 23611 44939 23927 39473 12367 40870 7716 11829 33705 35886 9009 11835 39764 33493 32381 10400 36272 22749 39521 6260 8270 9012 33715 51162 33720 33716 39188 26210 63327 37563 39834 40038 34133 39847 29946 33466 7919 43239 52090 45284 26690 40052 28882 35566 29183 35059 33793 40201 48421 39951 10557 34396 27720 42433 950 46847 22938 33485 43173 83958 36771 52923 82960 77233 82156 82876 11843 82945 22672 63738 35066 43803 91384 91576 91575 28187 3 28408 211 25217 8049 973 7499 28410 671 5466 8776 89 75 28409 23027 696 23876 700 1063 8866 25423 7980 10409 8775 683 8 25424 76 35500 12320 11873 5964 644 24928 5370 28586 1603 12423 427 12430 1499 11665 6906 118 12481 24285 5404 8248 6911 566 12434 7386 7042 5445 5708 5643 380 24905 59 367 12485 6943 5442 383 24290
143 5913 910 13031 10617 11802 10621 41184 46849 10096 34594 39349 21563 21582 35724 41625 33427 32379 39381 44304 59479 32050 42194 53416 33630 11182 10679 39650 35449 39649 39625 44976 11844 32387 50484 36736 29167 50650 47773 55402 50652 1806 35215 8338 114 5261 4797 8330 21646 1649 11693 29668 1402 7425 11929 1750 41585 12121 12589 12501 41459 37931 1433 6307 23974 11930 29825
144 40581 23576 23575 23578 10365 30946 26126 26224 54857 49572 69880 30554 73343 62262 53955 63965 44879 61050 35792 33502 53143 73738 69334 68291 65517 65408 56795 73820 62143 10622 56547 52947 32878 32671 65792 62883 70436 64091 26223 5918 35874 49594 32879 33900 63610 44311 54135 59980 30954 52021 55474 41897 80751 58062 4868 79329 51377 39321 26225 38018 42334 28742 23579 44689 33588 52196 43720 61610 52066 58538 34717 36981 70437 70438 67663 28041 548 26033 69336 63677 62853 71346 40849 27354 28747 11119 69335 71497 69848 27317 58369 73586 67051 53273 46623 44142 33286 65392 34735 62208 52118 56082 66078 58330 47219 39329 6259 21567 35906 43518 50210 47138 55914 53496 50721 54854 35660 33690 10627 28044 45280 76387 66398 77501 71537 30557 53144 46079 47167 30558 53142 51806 53262 49573 51955 53827 50892 63966 57924 55890 55298 23168 66076 41574 44418 61042 76920 77843 67882 75408 77502 32516 50226 39327 22510 64713 62846 53317 52023 12743 30798 42979 5837 32511 57925 12363 27400 35299 52024 63548 39331 75420 35302 28560 6264 22295 36875 32509 58640 69857 11806 28291 62772 77496 69337 35441 23171 37901 26127 31703 61031 21553 42341 8425 53523 43561 26034 53524 25406 35875 44731 69592 68553 49574 43827 73293 43447 33419 31972 85379 78770 35872 43562 61232 58599 45445 60181 38968 28752 35776 37899 49735 27635 32663 73802 50420 40324 10377 73039 28750 65602 33412 69410 60509 41575 79262 52039 48772 26144 71498 51800 36744 70320 28045 73392 75409 60164 11125 39396 6267 39111 60594 67365 22298 22306 33536 44621 44816 68911 66399 47742 57810 67143 47668 60132 56799 39137 63967 63968 63106 56798 55388 42213 52560 49595 50129 77503 69021 71347 76909 51802 37698 55619 39162 46835 44880 45704 30963 35308 35303 10636 50348 44382 60378 52950 46676 44624 81351 51497 48034 50720 10638 35549 22016 30561 10382 37646 32745 50227 30627 44906 32510 4873 65472 41862 30311 57280 61043 62639 70961 65118 61494 35861 46073 37997 67406 52034 11813 22301 5838 54985 81205 41406 35443 27405 37905 80838 28761 49780 37909 5922 69339 69023 76425 51803 81083 30948 75054 56903 50317 58734 28786 71972 71353 62728 80881 72069 48767 43688 67664 40591 66080 39020 82220 43830 26035 69910 57520 80746 47549 61101 58565 57170 54869 50221 30966 28994 33102 56407 78810 41905 62784 67895 41376 31850 60775 26230 45136 48701 39141 57616 77504 62284 68043 26226 38533 66129 66903 73479 50893 43297 62926 41402 45772 69024 61609 44320 80625 52032 73754 65572 54707 45206 35311 52040 79468 33248 46988 76808 61686 52030 52031 10669 30962 34746 51801 32512 35310 11819 35312 45817 11808 37907 67722 39400 10095 48765 48768 65652 80886 10103 52348 65574 52028 66561 30800 35487 47155 51233 37730 65075 55241 30630 23593 30964 42606 57555 39414 10379 35315 53140 81901 65119 78464 72780 39516 34465 30975 39397 81371 43062 38969 47937 64690 68047 21577 71351 36171 45886 81084 77311 73333 10907 49012 48771 66156 50319 28768 35781 68915 26227 78701 50801 40654 69338 43689 47351 69344 54042 27414 74052 65609 62934 43230 64164 43831 60655 71860 39409 58073 73130 58061 28814 57171 71214 34547 58718 50549 28993 30971 12843 32759 37540 28748 30718 81852 26038 28765 30970 56408 48547 56567 42507 53824 77292 69032 73682 43687 60805 61151 56802 56803 69031 45137 41391 76597 64210 62928 48766 81452 60595 69025 77505 35780 21574 62827 44070 41805 52041 52653 41736 35321 44885 66652 69281 30629 71328 46681 63827 32747 55337 37200 22308 45891 53732 22019 64128 44144 51804 66132 35322 50813 34754 10673 22307 6225 26255 60451 39395 61495 34548 37142 39370 4875 35050 23602 6232 54486 29938 39432 49042 52873 7107 35779 62868 58307 81085 55635 23620 23604 76503 52872 49713 61966 48769 83073 48290 30635 61046 68055 56865 62937 66377 66823 48773 54800 28769 43833 58560 69027 53711 47650 23596 71352 51928 54934 56412 46494 60823 56711 58598 57911 54190 73756 48369 51763 62471 59287 80825 36270 35862 26043 68045 46319 61302 48484 60466 56411 70336 40326 56806 46078 56807 43325 61496 41397 69028 46996 28805 69029 45138 57633 53723 43396 65979 39210 59305 58074 30643 58725 62932 30634 53529 35323 6248 65882 69340 51401 33628 28771 68380 57604 70641 46680 23597 44690 62497 52050 55338 69346 44430 46042 62508 22541 64728 33696 10678 49052 48777 26042 64017 55107 61045 47643 88243 34600 43566 26044 60513 37232 63643 60650 53713 62933 50073 35724 58597 50803 61578 45718 70266 45851 58613 35437 35483 56423 11130 77845 70542 26050 10642 73777 41401 62648 56410 66340 59193 37203 69033 67052 62505 65603 70643 52046 62865 64358 47651 69345 67332 45994 4876 78488 65208 3907 12847 68871 59056 75425 45719 13046 6243 10639 50295 69042 64157 41814 30982 50225 30208 41404 41407 26232 69034 49888 41154 68049 70203 54503 56809 51649 66226 28835 59614 7632 30641 36001 50898 77306 73568 68554 31860 21575 76154 31861 4877 43048 63107 52351 47941 23603 30984 53604 70474 39405 51090 50074 83072 52249 69433 63270 57940 41405 37633 62649 30977 64156 30636 22596 39457 62650 72540 45710 52052 44824 62610 42556 53826 55799 44192 52056 41606 51807 63011 33889 31160 34388 28366 36647 68194 37674 63234 61192 55150 33541 61498 32752 10654 58972 39429 43568 50805 62316 46545 44907 45212 64716 48362 10397 34750 29937 29936 74804 43677 60789 31304 70712 52057 71763 44426 6262 58593 27211 71124 60568 62940 35783 48679 43836 85461 41223 65614 26229 50086 70442 31869 55031 47593 78465 48485 60768 54509 43395 26048 77570 52426 69284 77507 48423 80288 54484 8361 44432 35784 52688 54987 66093 52054 61703 69035 42574 54508 50899 36578 64408 69038 66091 21587 70290 65375 77506 75433 64802 53733 30987 58299 71195 80880 59901 79268 64160 10668 37917 33024 72675 32750 71390 39491 73084 39492 53352 33957 39489 40655 26054 79767 60501 65605 81390 64855 50698 71507 47653 47659 56813 6250 48609 53719 21586 61250 45005 69887 47494 68062 52263 65152 57558 65643 39494 60703 69191 49051 12842 62125 39528 69350 65335 39529 37926 87720 86927 41791 59826 64019 23684 62745 54629 28788 69354 74161 69046 69353 59532 67665 66831 71220 50699 83606 64020 28783 68491 21768 52991 54638 63062 58626 62019 35334 58849 45616 66341 68769 56573 39174 68052 28646 32386 67969 56013 45589 78459 55153 55026 75132 51412 8424 6268 39484 57163 79238 51516 43751 31862 6187 65336 57004 35053 62281 68890 68883 29933 69355 35791 58304 57703 38192 37922 70446 36677 39043 39601 68881 69094 68500 71223 61104 60168 65246 47684 65000 55868 42699 44306 58662 58676 38708 54310 50930 39200 72097 63025 73885 35873 56231 66650 55158 11836 49653 11138 21649 22674 72203 31165 73382 45591 48680 35955 35345 59506 37155 42053 47195 61501 73339 68366 69356 65130 39036 27431 26233 34769 37923 69368 69357 74829 65129 39756 73173 39667 68350 64943 53277 32381 53598 48414 66232 37527 34531 59651 79861 59508 53530 60382 74536 41225 39733 11177 39734 37407 66100 64641 58703 45593 68205 69211 30654 76055 75133 39594 82612 81391 71057 78259 58633 68993 74549 37300 27795 79782 35347 11144 73531 27850 69363 32761 39758 28797 80837 81953 23625 58321 77571 80749 39748 27433 60716 75474 69901 23626 39773 68505 42692 27432 48863 53411 70645 37543 28802 67049 64805 29934 39663 30940 31173 48867 31179 46080 72944 33901 56923 69365 67889 56721 72079 21593 73028 43614 32766 61251 33493 74967 52999 58636 58671 59063 58648 28763 75471 39832 58637 52608 40492 47496 39522 51112 26236 11150 48823 69362 72302 68292 43913 49709 57165 39802 70452 71228 52184 68996 29945 44018 66751 39769 53601 69429 60446 75478 31306 39749 69367 53714 64165 47660 55821 66240 11842 39822 48611 59897 11853 74647 54868 61570 78076 42826 68995 64727 37173 67081 61838 69371 3405 46081 88226 62283 74007 76782 64030 32382 80828 48307 55760 47791 59065 76841 58645 35352 57006 65154 63826 43579 46554 85762 73564 27836 59010 79226 39867 47344 79281 39886 69064 76622 60597 43690 79280 39893 39747 39902 39903 39876 52045 77574 69059 57607 69366 11164 39872 83451 73711 68978 55234 37525 32118 63073 75488 70184 69878 54312 77479 64730 58655 64732 31175 35363 39725 66363 39807 45595 69373 69066 75510 41373 22738 63282 39738 68236 39838 87391 4880 82477 65867 79689 47662 61507 29162 37927 70457 39932 39934 39969 39959 33503 72872 43583 28815 49522 67579 39982 26211 22751 84772 80323 66734 30205 79286 79206 67797 69280 71232 75513 54179 83122 46041 58148 60242 60582 32389 39968 35370 35372 69463 64369 33717 28810 51127 68761 13044 78290 64046 37217 66824 52693 59757 23640 37929 50617 48421 40051 40041 66389 40032 85387 40042 40063 40043 52668 47665 79291 58372 54309 56291 43063 53715 75503 69670 67290 69003 64053 53299 77221 72993 53005 61509 68648 67111 75507 63033 74603 64055 55301 70723 67095 41806 55639 64740 31177 51867 67097 52912 30210 86527 61510 74640 67349 39879 37251 35687 37059 68900 40130 54326 73888 40126 41378 78449 71805 40038 72623 53424 67302 29950 85616 84773 58727 67555 28755 40034 56917 77473 77474 64751 22766 66947 73186 75518 45622 59848 66342 47340 83845 75616 37068 73541 66470 46576 46830 26690 75517 28204 69076 67096 31713 67358 46083 60452 42799 36811 44390 44460 85352 68518 73135 80830 64364 43052 36890 74731 75199 79162 43823 47322 37930 79301 79302 40219 47279 70651 36283 40197 68527 40193 49583 40192 35061 63570 69879 77575 77630 83352 40212 40117 40142 46200 52910 47168 54163 78961 53010 75684 84119 66820 87133 61386 11858 64373 73720 11163 66618 65807 36641 57941 63533 69726 84162 45598 58860 44909 74676 40202 36642 43342 57744 40206 57401 40154 80992 51142 77590 53278 28883 61196 46551 10906 54674 36583 71143 66830 64208 65144 47319 47348 40157 40122 40279 45636 22932 72616 87134 81395 43301 46564 33489 44492 67119 71740 76085 41382 85073 75173 62286 84033 66625 46040 29959 83030 76760 30995 78260 40121 46044 81028 39916 76845 90108 11173 77869 84573 37062 71272 10908 86112 46890 42492 79827 35450 45601 44943 56869 64064 46098 56872 52089 45603 64377 45580 86323 79068 32772 71142 72089 83846 77380 74641 80173 28759 44071 36891 47675 76695 84798 57618 87920 43055 57292 79828 84405 43698 66364 47677 71556 85273 74733 72088 44910 42221 81952 75135 87215 59448 85304 53547 73496 51770 40270 40214 59655 64908 29963 54459 62327 64376 36321 87376 47683 57594 76792 29966 65331 87321 40119 78007 57157 72071 75066 59599 63686 78718 65387 43463 82013 62701 11190 62700 85307 75057 67719 85773 53856 63466 55838 35565 63633 85892 12258 66961 85306 66962 51418 42489 56353 68245 64378 59360 33477 10655 84931 1531 76789 68645 62709 23631 76847 66204 83784 74646 69751 89191 82356 62703 76089 43700 85278 33485 33507 54464 62706 70914 28213 72781 60457 29518 28208 27853 52921 78689 57284 85400 43626 81598 83587 86476 36897 71276 57590 81025 86275 62134 88830 83014 86114 83556 59808 57592 43460 71779 56661 86200 73064 60454 46553 88873 88734 86494 82653 89357 28811 90372 71605 76434 48984 11917 82377 52091 70514 85872 73514 87180 85500 40262 66752 42490 76801 46043 88080 77486 89367 83359 75200 91390 88281 37432 85645 28139 69080 91327 86064 85294 69678 71568 69677 63557 87094 89696 91373 71937 91578 83582 91275 76803 43168 70581 90791 90507 90950 43457 90497 90850 79180 67637 89194 89848 40984 57161 89349 43465 90906 88000 91274 91174 73358 91376 91328 78890 90802 89387 34143 56128 38231 90884 86122 30256 73357 91106 89372 33510 81080 83585 33721 26210 70582 59905 86138 73359 34408 38917 50653 91408 42460 34932 32702 25211 30577 23343 21762 66297 28017 21785 33652 24873 12429 8702 32858 7979 6927 25565 7491 9041 34227 30314 42457 8633 6795 42458 29304 27699 30459 28571 31964 7185 72072 28912 5597 119 27815 30189 4890 27522 23210 5395 26539 25294 26062 75822 27883 6409 26523 28951 954 34070 23650 68700 27364 5736 45131 24000 21894 7002 35586 45488 5603 24149 21643 27746 12424 21863 29813 10433 31091 7627 7523 41776 27949 6865 9045 6905 7702 21804 5392 10814 8045 5686 8755 9046 38233 27988 36113 48279 30267 27944 43711 31138 7982 40674 7526 9047 29281 28924 1549 42399 46027 22992 68020 52791 1491 8606 24990 30389 5368 1506 24150 5448 5407 432 44385 44384 28921 9496 40424 26880 29771 72985 33 31412 4787 34919 41546 9049 9048 41778 37634 49820 567 9050 6429 7692 6576 32156 27742 28268 11279 10867 10951 7493 8701 132 3165 7205 29371 38386 7827 25222 598 29522 1806 28287 5404 27647 9156 29639 9052 27450 26152 25125 9051 123 8708 7531 25237 21789 31312 436 226 40683 43733 5401 41856 30571 9422 9054 186 24837 8093 31079 24775 7021 28960 33841 5376 26163 7522 6556 31115 6963 34078 5387 8663 12303 34079 9055 40912 21485 6877 29536 28290 28656 12323 25227 5344 45024 42133 24809 6697 29877 5379 6590 6757 25134 9057 27362 50051 25289 7500 24778 6603 10470 9056 8073 6666 29241 69680 34080 25217 467 671 38253 44386 6730 5440 5386 47108 6438 7866 27745 181 6606 6711 34623 1568 5378 33126 29507 29671 34083 6441 6668 9066 28574 9059 27933 25219 9060 43382 5729 21794 5417 9061 3566 22067 23061 1551 86 10427 5588 36239 44953 51104 60821 24245 27787 29818 29819 38922 31612 35461 11200 25184 46400 8656 27960 28717 9062 32746 27964 6676 21584 5629 32220 27950 6365 8739 7405 30265 5360 27981 53963 61412 57519 27970 31000 5405 34918 12320 8841 58077 118 1849 30535 21696 25276 25 51385 25281 29238 6442 4811 642 10747 9063 27363 5476 9146 5399 30999 7984 6983 26816 29606 10689 9064 3106 5388 29523 49446 26738 58922 38110 24236 28271 23305 34945 24148 29637 33058 6443 6985 30821 31074 8370 43989 29902 28813 29232 42925 28365 7529 48411 6956 26594 24157 11873 9147 31637 6076 28370 32483 21759 25441 29237 9084 38614 38558 9065 75823 24871 9153 6632 42224 32900 7539 27985 27934 10169 29672 9162 6618 24992 25290 7410 28384 44387 4782 47060 1930 27244 6321 32132 29674 8047 9067 12122 36573 5413 9028 23541 21802 25351 24993 24900 28294 42800 5415 1603 563 5 38999 10783 30562 8277 29769 27789 5370 5642 85739 26886 12433 25161 9068 7534 23051 7600 34789 29692 52634 34916 8593 12470 12004 40314 7028 31116 28916 1558 24756 8617 23655 8509 5590 31093 6989 27951 12333 27090 9069 8003 21488 9071 8599 291 568 41175 427 25275 8612 9070 40531 39000 27365 5435 47511 7873 111 5985 10437 615 25299 7874 30680 24332 21854 25353 21803 1492 23991 21478 5369 9072 25029 5372 195 8020 29673 22048 8108 8669 28884 23657 7803 31929 5930 40966 33728 27790 21769 31955 31088 278 50106 34087 40879 23670 29647 5397 28217 33056 33916 25529 34084 9583 9091 32130 28147 1600 1947 31365 106 29516 5414 10940 24803 10932 25282 27369 21874 28766 483 25286 29676 42134 10931 6592 30390 34088 5373 1560 7186 9075 8037 6257 687 33856 26529 24212 1871 5821 31323 27091 6643 8000 8811 1990 7868 77 23660 5726 35578 95 24904 9559 22237 25543 23114 42927 8785 33059 26091 32947 49764 34814 27482 34090 7985 178 34091 31117 13066 6860 34198 566 21483 10877 34089 5421 47561 37348 37736 6949 5396 12305 25287 6505 7870 25197 11294 29239 25314 26020 55615 26021 5422 5460 47754 1562 24728 5375 25324 4981 1884 40806 59771 8354 21815 63481 4936 5423 10934 191 11295 38296 42921 10445 5467 5411 40479 42924 29233 29261 45369 23270 10885 10933 9558 28264 33325 8589 7232 5445 29236 6605 27971 24757 8040 46956 45926 33650 10878 43199 29755 25343 9495 8004 6698 21807 22073 21793 5433 24966 34093 1888 556 5434 25433 57872 25165 5437 5406 29245 21618 6608 28584 5636 51408 22963 31342 32946 35463 24810 29234 9561 4776 6566 8590 27967 9508 24963 23212 25241 1889 23649 62417 9074 5442 9562 5457 27932 5452 27729 25123 208 11013 9551 27945 29898 6271 9077 1885 24117 94 36380 12315 5575 1565 25062 9024 5336 8002 24962 9510 31076 27709 5721 11999
145 669 373 114 5237 5326
146 9927 835 8205 1539 8361
147 39798 35560 39594 39792 50293 30521 39871 39848 63232 39961 39923 50471 39738 24800 40216 40046 29963 62775 39467 40055 56923 9519 48935 23168 42018 60483 39940 29959 57294 61173 36850 59651 26689 40121 39872 40130 57291 64378 29964 40217 70611 53517 35497 62014 17058 19283 35565 43042 10686 32118 53243 59381 39980 26693 59387 59384 59905 57289 91275 57292 54731 5141 30256 19879 84747 88547 87047 20566 45845 75164 23159
148 31564 1792 1787 684 7505 5463 6539 1198 5436 9312 7406 7853 23714 7368 13067 1382
149 596 395 29454 13017 13122 10898 4321 10895 11063 4135 12696 30329 5855 17977 4390 18328 11062 18822 4346 11918 18847 12709 6157 8391 45477 28236 19942 4839 33957 1444 946 66130 46997 51173 20101 37361 53051 6530 1608 29824 1990 5977 29830 11777 21349 28264
150 1367 7200 5381 12374 23707
151 6537 23030 42775 21940 29804 23037 42776 42777 32591 24259 24290 47605 47923 24289 1881 6808 27125 6521 24258 56394 6809 32586 27118 1900 6522 10955 5836 53680 24232
152 382 11227 7821 22062 7809
153 70041 10427 10420 13570 37744 10880 29690 31939 31944 10882 27376 50131 29696 1612 5690 27931
154 15757 3414 3391 756 26663 17031 33273 5755 3318 45308 21654 17268 9952 18345 17326 17358 17403 7455 3593 17394 7417 3672 17504 17547 17492 8574 17537 8183 34652 17631 32418 36645 43319 656 3685 5784 1277 17486 3758 15695 22215 21997 30295 1835 14054 124 3877 17777 5791 18118 12454 18047 12858 18245 3971 12977 3879 26101 26697 15090 19535 1252 4266 18562 25196 5392 1491 12406 6906 7699 16218 32716 16430 16679 7205 24740 8182 27740 21490 41216 56387 41470 23709 8805 6747 8766 7019 7020 8768 6556 8728 8734 8730 7021 8729 6650 30464 7227 8749 5772 41213 57 6985 25425 17 12323 25219 42460 7984 49066 11200 12433 563 23655 6590 12029 5615 1947 30680 32220 155 30461 27491 30576 26473 5448 40888 8811 10874 59 12424 27643 1930 26474 5417 144 22991 29 141
155 29792 29611 13723 35428 26289 24400
156 76345 1230 33909 29880 12494 5327
157 418 7405 10181 7539 26529 10831 7386
158 33708 7894 32515 26505 29650 5448 8701 7500 970 24236 38 31925 66 40424 5602 5608 5601 33 1695 1581 29746 35700 23423 21831 26793 1566 50 26778 8023 26779 26782 8055 21830 37946 21835 30473 28938 36000 5579 8540 26794 21843 8713 8715 8714 21834 1069 31600 46037 31598 31599 8709 1569 4187 32170 21829 5692 8024 1604 5201 42 24418 8437 1868 5693 278 11208
159 23650 721 123 373 46 659 23361 12395 24346 48 76 75 0 5608 241 27445 52 537 118 7034 13 34220 29 18 35026 1320 6914 42 25162 15533 24 32585 7200 38 12467 7202 12858 10950 12299 4 27800 27479 33844 27733 25214 25345
160 23603 10639 10644 20957 26505 6250 30977 55169 21598 10656 35336 11818 27413 29933 5650 30990 11824 28632 39454 20888 24697 26981 11145 23609 34553 33437 55238 7716 20812 41865 37155 48415 32089 41261 39661 26687 32526 32090 39111 27427 39484 34683 52441 23608 31276 23637 23526 39719 22698 29950 10677 39878 25117 10662 23613 12372 60887 33720 27072 43455 39877 12261 5233 20465 61006 45579 23590 32772 12373 29960 32393 22827 29184 82482 35340 42203 55392 52641 57290 32086 88123 59384 39316 42118 89949 53513 5225 23579 23597 21958 32407 33794 31719 35574 38231 28880 7891 21597 35577 34143 24149 33979 7724 1647 8278 1 1402 29888 31319 8319 7227 12759 30812 23424 23711 26787 5929 28357 37004 7726 606 36494 196 12278 5946 75 9769 7211 23427 8646 8495 24854 5729 8705 10436 10146 36822 6657 5357 11635 5615 5476 11873 26815 37016 8526 954 22988 7410 26816 1311 12764 5370 36827 27090 7765 7803 27019 427 29883 31036 1006 30459 47698 12494 620 38386 7721 1435 8101 1352 32886 5481 5475 10440
161 40168 69483 90373 64177 69484 64176 29200 64182 64179 73674 64178 70264 81518 59876 88428 64181 26457 46571 87177 59879 55004 59877 59878 64180 51829 51830 51831 80894 88465 90437 63962 80396 84355 79235 57158 67137 86828 80896 64184 87381 64185 33498 89686 80397 3199 80395 62979 53099 57338 74679 62298 71053 53215 85006 77044 80398 87676 69490 69491 66401 63964 80899 61782 80399 78376 77490 80897 74682 80898 77135 87257 74684 38560 61796 61480 64750 88187 80401 90203 24201 79950 90225 91514 81865 80779 57479 88606 73579 57895 87209 69499 50642 91223 90392 89423 53461 89860 85970 69474 70021 40466 35572 83215 73963 88927 50678 55860 61941 86264 90226 91348 90299 76389 82826 82751 37171 90438 60647 86822 86825 86082 77679 70027 77109 76168 86829 77122 56209 77121 86827 90508 84497 77138 50673 66281 78373 84002 57889 86173 2622 47373 91330 71242 64731 91528 91598 33954 1746 7478 40432 643 30146 30434 33154 32209 648 7200 6827 31572 36206 23650 1042 11197 1647 44279 1078 3 11649 29975 12187 89 35894 34400 35964 24928 29016 10826 7406 7212 180 12861 7190 7408 12278 24068 105 684 26801 12775 33812 41285 29281 1046 33295 8461 8323 1084 12224
162 41612 5102 25165 21884 5929 44781 35522 24260
163 1193 8526 31650 1195 33921 41330 22081 10837 46400 8830 11873 5985 29430 7408 1348 26804 24010 5644 23114 22255 24146 1046 30146 31061 8277 25220 10688 7229 7213 27917 8509 5493 8354 1793 27922 8377 1981 26186 22122 22069 38386 5481 70 4886 10690 28577 26787 1269 1889 12278 21630
164 34601 44188 34615 43369 26456 34378 9009 22615 39681 26471 46769 32060 42456 388 64 36242 7824 1153 4 21626 68 8098 23027 12775 30440 7984 36905 11873 6076 21973 44 27863 29016 105 7408 12276 5821 102 1069 14 118 35394 47698 5445 6069
165 31662 7446 5101 24563
166 8399 9367 28904 45098 24770 5064 67024 37010 41467 34179 36595 10144 662 1561 6912 44041 44040 23704 44042 43867
167 10535 19679 31684 59759 57811
168 52496 71943 1593 3165 27244 37634 6321
169 29014 34154 1919 31895 7154 1924 29008 28411 12515 32236 8801 1926 32265 10410 23693 7144 23705 21623 24891 2521 22981 11328 8494 11331 21681 2439 12380 24572 42706 24229 27503 7177 681 11545 7851 43425 9328 1486 1704 1643 2114 24417 32238 1918 8030 605 7853 24001 35675 8733 25358 8753 30499 8703 29064 29379 27661 10857 10856 25359 8771 12211 28922 8850 31138 7726 29082 10874 23001 10823 8826 32958 24734 31141 28466 3980 29873 25302 33753 31935 41334 10861 36711 26841 7018 7012 186 12036 29009 172 11372 23011 154 36340 23013 28282 31574 150 2078 26185 153 34109 26180 166 5376 51862 41529 25026 30500 6997 9200 10763 29298 1648 33118 27017 8825 11296 1364 8755 35936 1658 11411 41530 26591 12578 5300 24418 23026 1367 7332 35952 32300 7856 1180 47639 7980 41490 9324 24564 27029 10146 41329 10168 32604 26642 5439 23003 25230 7423 25220 30721 10173 29414 714 27201 1405 1763 1485 26703 48620 1743 51863 27212 2254 8445 30310 11333 28152 24420 42369 40527 24718 24234 31775 31575 24235 979 6076 26183 1120 10858 12224 24742 1370 1921 24485 5476 1241 46251 45424 23805 29651 7240 38867 12536 31407 7288 31337 33152 1447 26745 6030 38313 55384 6379 1788 8792 32883 25448 26511 23893 691 30476 10416 23009 12388 8322 7156 28277 7208 7250 33322 662 28090 11334 7249 8541 684 12404 35622 1493 1457 7152 3756 30650 23984 23065 52796 25035 12213 7148 26775 32953 50298 34403 34564 26327 35100 32793 25210 5970 43084 27583 24176 25183 9318 12226 708 551 28094 38456 33323 27083 1492 25208 36007 25297 40731 4902 4903 24401 43406 36051 38455 4904 26654 56396 26263 644 32605 27699 48991 34854 615 23716 31612 7226 30390 10863 105 5404 7834 32436 26473 32212 33557 26474 1428 7230 27861 10844 12462 23665 24786 8323 64116 8785 5375 24835 5414 10871 10151 29886 33163 566 5421 1916 6618 4981 22313 11962 729 5435 27090 418 44353 191 32237 7803 7140 5417 5580 1332 10869 29276 31782 10 1006 10690 27860 1923 21807 1344 66 28114 1868 25353 30034 570 5442 24146 8037 5955 11782 5345 31929 5481 5475 157 8526 6544 1435 57645 24770 1178 8372 36117 24010 10756
170 10150 1402 10827 34073 7726 8257 30356 648 23002 28059 6299 28922 29388 30721 644 22354 23925 23001 1427 27740 43037 29507 5392 21804 23007 28223 26738 40789 37125 1555 10868 118 34244 26808 34254 28271 24778 631 24173 24013 23055 5369 44920 34252 33059 8040 10859 1543 25297 29276 7232 7187
171 23838 9413 9199 6395 2713 26570 9246 4676
172 171 33750 33749 4940 3538 28553 1026 29378 7224 1005 24157 6506 29346 8718 28570 8723 21620
173 26062 11278 9070 29672 27789 38546 31957
174 9248 846 17880 4396 20331 10276 33275 6883 29354 10548 49074 35055 33706 35258 33844 3 23877 687 77 27801
175 1924 1 7726 8850 10767
176 1399 27283 7264 12627 9312 6529 36869 25185
177 5617 9316 40421 35999 22222 31334 5257 21956 10583 13009 8990 35856 23770 55034 6587 43076 25376 9005 57907 5326 35658 8022 24820 718 5111 10826 7733 24900 24903 11891 391 6483 8886 1367 23127 23123 1389 23126 24446 11948 11776 13078 11724 28075
178 7828 10947 42373 7793 12123 10973
179 26947 37029 4421 38978 11617 44609 34709 60819 44935 6529 5952 45315 6324 31776 35417 26557 23598 28135 27857 6358 27816 5948 37584 41388 41472 5968 2352 6083 6098 2484 9359 7292 23778 6060 36869 33757 7778 33921
180 5821 8323 8295 25029 13 1006
181 46237 45373 38826 40229 1916 34062 78217 43193 2268 40235 22918 62409 57981 67212 58421 12008 28113 71841 8984 12006 90668 44542 89898 45637 30625 31284
182 23316 26294 6374 9322 26484 44933 35074
183 23809 5981 1252 29539 5451 5326 12897 5645 29665 29825 8012 1394 3821 118 1155 11633 40696 35191 1239 5436 26734 29891 36356 1432 1008 26656 34013
184 6956 395 954 35583 7994 8780 6953 34258 12312 47221 7867 5448 48233 34827 27643 24166 7493
185 8979 36126 11087 22244 25371 9281 35605 32374 27005 32580 42672 4434 22254 4411 11624 886 35682 23494 43232 21530 7904 22277 35883 22493 29131 30952 24666 38487 4734 34683 5733 42438 39709 39710 40682 26688 52787 79871 39866 32393 55109 3497 46394 12498 32032 27435 24147
186 14989 12510 15768 6943 1094 77 24068 12485 367 25343
187 38817 4628 3959 29504 32240 31217 4666 11302 22133 8450 29029 47636 46069 35661 10024 9324
188 8619 68 1013 74 1870 77 429 10181 38106 687 88 6914 12299 10806 1868 8249 10805 33844 1069 7186 8
189 7486 3564 31130 5449 24943 12374 373 13 5599 32884 16964 33858 29367 27213 23134 24802 23406 27449 28088 23261 29656 34894 23140 401 4336 7975 13060 1769 37505 1440
190 32206 36049 10938 33845 721 7209 8866 12 46635
191 6315 10956 29269 6554 105 35709 21 41338 36113 118 10935 26481 31503 37087 12030 10416 27135 27486 211 551 43406
192 27801 10952 245 13640 1795 8145 285 7129 211
193 31609 1445 1780 1441 34478 24354
194 16090 39092 34314 782 47884 45805 23886 23904 1120 23901 10892 23902 23903 21739 7029 3203 13901 14483 16517 29273 14654 46640 16594 3253 30479 16710 8381 15013 56561 17003 22173 47904 41079 24783 1686 34642 56318 4298 22006 26101 48990 51205 36732 13033 11 8249 377 373 13 374 114 24418 6806 25162 23882 26930 7008 36995 29365 28303 6809 1665 32585 21696 32591 22045 31579 32586 55047 778 27486 12120 26640
195 28932 397 25369 25368 29614 21610
196 44811 34053 32006 41696 22560 46303 10390 65979 10657 22568 11823 1343 6512 22574 42168 22586 39452 67274 55043 22591 32697 1338 39505 44592 22611 22612 26466 22607 39553 11609 27066 46850 22617 22618 11111 22628 68394 34683 39628 22640 22622 53016 12259 6003 22569 61692 7896 32753 22655 38196 34539 22658 22663 55044 22677 22666 22659 42186 39709 42990 80729 22664 39852 51267 11901 22702 45293 28445 22710 32063 32390 22705 22688 80977 22682 22766 22738 11612 28641 7923 22619 39936 22680 42562 22783 32064 40017 22795 80987 22813 2372 22845 22831 22814 51293 32393 40279 59724 45636 22865 46784 51301 22878 22877 22862 22864 40871 68630 43731 22751 38528 22897 47638 57121 59358 81006 9492 1201 22542 22592 22590 22918 43872 88212 88536 80865 30214 70264 9292 32399 27074 79950 87177 70541 29307 30206 78522 55004 51830 69487 51829 11709 22849 41786 91378 80599 32396 59880 42719 28182 51774 91320 32405 63964 22616 73574 63963 53234 45584 86264 34142 86825 90508 86827 9484 12656 45313 12653 32608 5659 24141 31310 22998 1676 32265 5741 8323 23238 12627 34442 44400 32434 11950 1924 1682 26729 12042 8445 42942
197 27205 379 23732 11944 11891 8323 10872 11920 24443 6273 27171 25043 35701 23725 34478 32019 7856 5672 35217 30660 28127 23140 21639 33867 14 30484 1539 4802 7418 23724 21610 10704 27211 28577
198 31226 27109 37549 31881 51339 10071 527
199 105 78 8399 7770 33809 606 33941 1084 1383 10422
200 26277 42434 5994 12434 418 42542
201 6096 13029 30715 6206 43324 12845 43370 50406 34604 11145 10676 49147 36736 81377 6264
202 29523 5615 36289 6094 1593 21471 6795 5985 9691 37748 13066 1564 3165 27244 18052 21934
203 4857 8086 35204 35894 22088
204 30455 28286 24806 24853 32763 5697 23331 1607 38854 40 12490 26482 40874 1997 1094 5397
205 30533 5370 10867 26537 5378 29637 29606 10 6581 1546 427 32421 5440 3297 32824 1603 8049 24887 24892 5413 11665 26531 12343 6868 5369 22185 24889 24873 4936 5437 5580 27920 8746 38398 31637 10169 8726 8744 23235 31620 8751 5377 191 23208 21584
206 27217 87677 10592 16387 4108 44155 10662 3009 14910 14923 1686 1652 5247 376 1629 978 23802 5426 1680 32860 393 388 1004 1688 25321 38856 27104 30832 1726 30010 42757 1424 8839 31833 1724 25061 26804 13092 34012 5641 28521 35964 7228 7212 11631 8838 12274 670 1782 23106 1694 39068 41434 28297 21962 44858 29746 28512 8391 31564 34374 8718 9345 26514 35411 6528 694 5643 11208 394 187 10924 27770 28526 655 39061 28515 12280 22312 5967 143 8872 160 21620 23243 1328 29346 12461 9367 32811 38 5101 22068 23052 9404 5702 30379 654 21626 27445 41285 29976 8711 1796 10952 5466 8836 1200 32186 102 46977 38995
207 6989 8633 42399 34919 7204 33841 5236 15792 8705 9071 32130 6945 34064 10932 40872 9056 25123 21489 26021
208 22312 14 33072 29038 25217 30377 23031 38570 23057 5933 9336 10440 24676 26579 35461 12269 12761 9346 28966 1361 1560 1384 40926 5414 7422 26809 5479
209 10938 9163 1868 27791 27091 5445
210 44651 11884 8320 5985 4775 21632 5111 22122 1712 11776 29516 32355 33939 72
211 30710 65669 8322 1667 29858 23825 1725 8053 42804
212 35215 379 1809 33906 114 7504
213 21535 35290 33016 46072 20813 20888 13025 21092 28355 35437 21051 21066 21138 21147 21130 46445 56998 48287 7110 10366 22295 23579 48943 23584 22299 35443 23592 6818 23599 23597 52045 29870 12258 39396 36560 32386 28880 46320 31173 72402 30219 64758 43905 23642 35485 33500 33479 30212 48984 39881 32404 31181 29959 39915 44467 39872 30239 35450 40122 32407 40214 40118 72639 11850 40119 38231 32527 42720 57290 57986 40212 40272 24149 6905 34070 31329 23074 7982 8031 22992 432 17252 10867 23133 987 8045 11278 29874 28290 12334 22990 28654 23021 28656 33814 6603 8322 5344 31115 11200 5729 26059 24809 6711 33058 12862 5357 11873 38110 5476 29637 5615 41203 25219 4884 7410 5580 6618 1603 5370 10783 27090 28294 6928 12333 7803 427 25299 25029 40908 729 5821 6592 31117 7870 5411 27091 5445 5467 5406 8040 6566 5442 24810 24805 1565
214 9049 9046 26152 374 21789 34224 42133 40674 47108 27933 31358 43 9061 31091 7003 31074 40911 29646 6961 6963 6956 24770 5618 28813 27934 9162 6946 9499 6952 31839 33916 9071 5703 34789 34932 27482 6989 57517 70375 6505 29647 29744
215 21994 21831 28367 24846 24785 24850 24852 5687 24854 12471
216 1870 228 687 28229 106 25343 7797 429 367 10835 10940 81
217 29100 6798 55789 4795 26698 21955 5973 28942 23704 8336 27450 33327 6299 6548 21619 23123 1610 5421 1564
218 9199 2314 7294 12443 24119 22315 23650 8061 976 25321 24893 12469
219 25028 23305 12343 29606 6676 30195 36047 1603 1592 27175 56512 24401 26654 9069 7803 5580 26537 41 40433 38867 5579 278 5413 7874 7386 21854 47511 25029 10437 566 1874 191 5467 5396 8004 23212
220 31923 29181 22986 670 7437 13060 10456 27094 36155 32570 38595 658 1902 7014
221 10878 9583 669 34308 26624 29258 35088 33804 28813 37532 27901 40356 34079 27926 9499 36087 32451 41546 34300 51384
222 12413 708 31553 36338 5596 33328 8322 6910 7990 8749 27740 10160 28890 662 8772
223 10233 22194 220 167 8150 5109 31425 34995 431 7709 12944 16447 16449 16084 5114 16319 6705 16672 32023 3177 8958 8083 1746 9223 835 6890 5087 35503 6676 5370 29982 23991 7721 29523 39254 24805 26697 17 4337 23106 11943 5449 6566 31323 5963 1800 30833 5729
224 42753 10419 12275 27905 27189 27700 5744 10412 5738 47607 28480 34277 10470 37103 23306
225 6855 38069 40739 89838 23407 7018 41490 6997 41329 28117 8846
226 37569 12483 8436 26556 5199 8803 11912 35701 38107 23149 34012 6864 23802 2045 37570 45818 29363 6796 11919 29900 28408 28216 28410 11961 32922 35211 6912 33117 7430 28409 29361 35210 427 36118
227 39931 39943 11825 32836 39920 9017 35058 40070 10904 10622 42013 51760 62496 38451 10356 1030 44543 45179 36827 2721 36858 35958 24497 1462 743 48991 10456 26841 40569 6974 24010
228 33953 37751 27371 30314
229 25286 33841 25287 34091 34089 6949 34090 27971 40479 46956 10885 9056 34622 5434 10933 33650 5636 31342 9562 5457 27932 51408 7866 24963 1565 9510 7537
230 45607 33839 85142 11648 29668
231 51008 3845 50985 51010 17910 38337 41053 49770 18252 17943 3785 17388 62586 26322 17841 44765 61274 37797 51006 65724 38338 56003 51005 66688 57493 72149 18072 27715 17712 27806 11259 38339 36411 50970 50998 51909 44781 51908 47939 38340 62570 41951 18237 50997 3966 54358 17745 65720 49769 50991 53288 53287 18104 25100 52146 35900 51019 55349 52145 18348 30329 35901 18575 25095 41096 38341 51018 1304 18605 52144 18590 20114 35902 55352 18574 18546 51002 53291 57796 31565 33033 51911 59168 18560 32724 51021 45054 53259 22411 58086 46480 58091 18915 41953 51009 28707 60081 46939 18939 4116 51016 37801 44806 18956 18766 56137 33937 38343 37798 44782 36417 53289 12617 53290 28734 5784 44802 50965 44787 19099 44785 55923 44791 63376 51015 1262 51032 41956 60839 51033 59835 32166 58720 19016 62572 19623 53258 44789 68113 18547 53292 27719 11261 56126 44794 61068 52758 37802 34173 51043 54360 55997 45036 63804 35903 51913 62580 57800 21142 77246 53265 52753 52754 53261 55353 7827 7820 7800 11271 10980 1894 21761 12126 27732 43407 11212 7823 22062 7822 29264 11220 34092 12122 10976 12129 11267 29261 8626 8785 10983 10985 10978 42373 11294 29266 35924 7797 7799 2842 7798 12120 12130
232 44416 71233 26233 56595 48173 28797 28802 28799 56908 43614 48654 62124 66872 69929 64036 65598 52324 68527 57034 74019 73156 45599 43772 82264 58871 80084 90364 71571 29162 28810 88741
233 41867 12367 30941 12364 32510 44192 10366 28990 44642 30624 10328 15492 33418 9650 21331 15864 21115 37646 7891 51372 28994 26227 50417 46835 13037 32948 19808 20222 47156 30886 20349 30975 13046 18513 29927 44071 7898 22308 43900 40350 56323 10639 22022 30208 44691 50813 50805 10388 39414 59044 48961 52061 10637 23611 6902 43392 36317 58297 43301 35336 11824 6723 23618 39484 39594 43910 35485 10573 29946 39450 22251 11829 12369 44282 41005 80591 39725 10400 3361 30200 51379 27432 30204 44679 30205 59610 43905 17126 44402 40034 30212 7950 39410 46564 64753 44469 57591 47140 91285 6617 5616 21955 23113 6906 28187 33328 28409 5599 8322 25423 1924 27450 23120 5615 25424 9057 25425 3073 987 10 25028 10867 7803 12334 5421 23137 11982 6603 29872
234 34293 2876 51384 41561 13693 6952 21808 40806
235 7477 6506 29829 48 26706 8322
236 12295 21476 5428 4779 34068 32482
237 5687 38542 23333 105 23336 152 8257 27479 14
238 39898 23697 10826 10147 12025 12027 639 29888 27437 632 6801 7219
239 86 149 24171 34250 10818 367
240 46807 41262 46005 68252 32763 28974 32216 5925 31507 30267 28943 31510 25426 25220 26886 24366 30571 5422
241 66397 40678 57288 7960 66088 21935 10703 37018 5837 12167 8322 32156 1539 36162 5471
242 34773 47591 60058 51876 78532 28092 46308 85148 33039 40419 54201 42481 73371 40061 22783 22771 50770 57553 23717 22800 5292 22716 46584 35887 74851 54936 1707 91021 72789 29167 40235 11176 77665 78267 68263 22888 38935 71133 53476 28206 53505 38327 22904 77168 22935 65097 86218 69272 53508 83630 90462 90747 53215 77419 55030 22878 22661 89423 67632 73963 58469 51889 44208 44063 53510 25538 82752 69229 43797 87381 42411 33907 8826 43373 29058 10464 778 10823 31407 447 12620 10749 23600 24420 9979 23301 5698 21754 51861 10844 12034 12064 26474 23064
243 27154 3353 43083 4534 31366
244 23143 38271 1104 23773 31553 8321 5340 25369 703 6958 26559 21476 8838 42591 975 6528 10764 1554 32582 11662 5489
245 57278 1622 48243 41330 52486 6448 21882 23804
246 8099 33036 12126 149 6443 23049 11218 7825 27732 7794 29261 10973
247 6289 24764 28497 5654 6603 24912 9453 5440 9310 5615 25293 4884 1603 9148 5370 6657 28217 29082 5821 4981 1871 24803 1435 5433
248 72901 71345 28782 70713 66939
249 27015 42185 22286 32204 44976 36986 22614 2798 39462 38250 39440 673 39062
250 45124 673 33395 1717 45586 37587 24092
251 8948 27763 22410 31959 13367 16953 15414 25344 23774 16 7929 8224 35309 19348 19498 14561 11996 47233 22553 31368 7893 4310 43891 53615 61188 58904 51494 1035 5837 1364 24417 8781 8755 24407 8727 8770 8733 374 2458 27797 379 2136 37552 7504 24420 10871 615
252 12266 28546 36355 26808 28497 35948 33306 1634 7471 5699 600 36796 29589 24488 8304 10854 38863 59450 26816 621 41509 43 23967 6917 29861 7129 50059 1034 31617 43894 22314 29582 551 1744 29013 640 35944 31875 28829 5337 52596 28466 27814 35947 642 24736 28884 37435 26561 36827 28664 12348 1212 6554 605 12063 8445 36500 26514 36756 22122 5473 631 11655 34634 24013 12278 5428 31225 8391 50774 8347 5968 33166 12387 29276 40525 38278 22237 12280 23052 26589 1916 24147 729 28446 1704 30760 21962 43440 10874 7221 28577 24298 1234 22995 7728 23716 38856 23881 1786 2571 1328 5697 7232 602 1383 8330 1889 2114
253 33155 25009 22029 6372 32158
254 32249 27583 662 6479 4795 48336 12766 23029 8886 30174 11892 37302 12298 42844 6918 30832 22068 8489 30837 6451 23005 12483 45 28910 700 27021 31232 40432 10949 28217 7721 12384 409 8723 28303 26923 2923 373 13 41342 374 10443 10409 24926 114 11990 5044 5237 38964 32780 1063 554 1543 22129 427
255 8794 46622 359 6280 1903 52119 8774 2203 67500 7748 27205 8852 1508 28451 10456 5389 26274 36048 7267 5964 46740 10769 374 681 42709 26654 1665 31777 8437
256 51503 43524 50200 35058 88812 22785 40149 42796 47881 7964 82181 89815
257 2635 45793 8149 47240 61272
258 2023 4764 59865 10622 32380 33599 10654 69277 33600 30991 7991 33447 24437 23616 12256 12371 21004 30826 40870 47858 32384 32437 33221 2203 52374 10684 38450 42108 38326 12367 8044 29429 47629 75650 63683 22272 34683 40682 32894 12261 39682 62732 372 45963 9023 32392 40677 75507 27158 40993 32067 29184 27072 35927 40871 80613 55248 7378 50539 43155 46760 82155 35498 7087 3948 27176 73651 32403 39994 32401 51314 36085 29620 6552 24161 8603 12765 1006 7238 36006 1885 33163
259 38436 40393 1307 33220 44607 21563 34452 6804 8292 12121 8774 24147 26751 25423 23179 10710 35891 28409 438 23189 23600 23188 28434 7868 28884 649 1006
260 32479 36041 26747 662 46808 5937 1007 23016 1230 1415 11783 10147 36959 10165 1 7726 7016 1414 5652 25052 21956 8323 28452 7211 32583 7243 46381 1286 11313 5682 2017 38267 35110 31977 43439 35108 8404 7227 6906 5669 25448 395 23406 23833 11927 5461 24235 409 12027 1435 1427 728 11202 638 10150 394 36569 35101 8550
261 6437 7825 35924 11292 11294
262 6597 143 25293 23233 683
263 9625 4905 647 7238 9363 35942 23770 26846 27161 41586 7042 32228
264 5967 24857 26759 1351 1685 7146 1465
265 28878 41375 41724 31375 67145 41723 81701 13024 1665 5865 47742 39354 51223 37698 60377 4467 9006 20540 49699 39238 46164 21134 44320 55311 37906 11888 21574 25047 379 35869 42606 20715 45207 5964 43567 31334 53826 21548 29936 68453 20105 36638 51799 48709 39398 32380 39572 41864 437 1647 39444 12369 50303 39615 1252 50469 43395 37407 37173 1687 673 24307 39773 39606 43522 53528 47422 41335 32104 75650 33721 35447 41373 21667 51281 39980 39188 40993 37418 50471 76269 53540 32120 39896 10903 61263 40297 40140 37417 10915 33254 50408 37420 10906 40183 77040 10910 40252 46887 29190 37427 45122 1713 80031 10970 53554 57987 59380 82125 83232 49874 41824 78996 84022 37432 29559 1652 78151 91380 51240 85500 7830 1694 23804 5201 25042 24260 36776 11973 36787 23124 34062 29782 28152 6810 10406 55 12423 514 31744 55412 8609 23889 48620 35892 21745 21749 35700 21835 26794 33126 38319 24324 24279 8766 2370 29800 37084 23152 2930 6316 1671 114 24420 41342 25041 27551 9164 12325 29359 26819 6808 24186 28268 31001 11936 24337 30730 28153 5822 37533 8248 21680 46634 53350 32436 44655 8602 8626 28766 33849 36908 36155 36588 5707
266 4976 7545 23755 12323 10 5608 21810 27660 23925 10835
267 46882 39805 39744 39734 39748 39747 62358 39737 28819 35372 39974 40219 33489 40041 39968 59808 70348 61361 76857 37532 25261 38592 36100 31958 6801 21859 31960 13412 5649 39099 31838 52509 34091 21835 21863 7532
268 11405 35628 10146 10160 22993 1006 28908
269 39626 42362 23105 8838 35103 23796 37383 24918
270 11115 33432 136 60172 40946 57175 12726 44362 39490 32011 37362 57972 53504 57694 28158 33482 91250 40762
271 19881 33495 55067 67723 30207 29870
272 20567 23096 21094 30944 21898 22012 10612 39166 34544 22290 30788 11113 6210 25507 914 35302 30796 30719 22497 43247 27468 35722 41184 34595 30716 10375 10102 22019 39343 22020 29938 34753 33696 33248 34750 22557 44989 11147 41628 52183 33541 33699 32685 25516 39541 35556 39540 39501 13040 33242 39651 31748 46880 10392 26458 37086 11154 34605 39625 27073 7940 39910 39713 33443 33706 43402 39995 8696 38393 37421 57984 29967 40180 4111 39739 39801 59387 57981 57156 52915 57160 7966 71804 91250 91582 90516 88338 90414 71285 91568 91390 43464 54464 12320 118 7500 14 0 12323 85 5643 160 21875 33 596 7493 113 86 194 393 38 60 125 8710 5601 5602 17 8622 5682 5597 104 721 61 12467 56 93 22049 1688 537 26160 7002 24993 52 44 76 30440 25022 12601 40523 7829 30 12303 15533 954 29 23650 35958 26880 34158 100 119 8749 21973 24337 226 10953 195 21877 6856 198 1384 967 6359 8104 48243 57 27647 606 23 42 9367 12312 23270 5586
273 347 6891 15559 27524 29092 15988 16711 31 15991 15894 12599 9819 21851 16059 10243 35236 15816 7630 15821 15944 15084 27601 29272 16397 34822 5095 9527 16914 10537 16000 14118 16504 5800 15697 16028 16383 35238 16612 5586 16303 16378 37447 8170 38310 3231 8546 3028 3268 16265 5123 8545 35040 7654 7053 23402 16486 87 23978 5654 1615 15 35254 26593 5021 62 978 6623 32857 46056 643 23751 22031 5597 13211 33263 196 12329 6076 46547 23013 31607 114 23269 7493 20 32849 7500 7984 32845 27481 4211
274 73 31 24899 7472 38803 10790 8899 1013 7206 44
275 7818 41994 7809 1432 7801 6442 6443 10982 6441 34170 34437 23828 149 11218 7819 1894 11220 10980 10976 7820 10983 12123 22062 7797 7793
276 7984 7405 29813 6904 1555 7406 40884 12396 11873 5370 25293 9057 25219 29742 31 7386 5415 5397 8034 211 28977 6603 31365 10495 34412
277 40916 9380 11902 12338 27274 28937 21830 26782 21831 21974 26779 6544 2320 2134 29862 29570 605 24265 11901 29580 1396 8748 5385 24832 8738 26797
278 24364 12279 7504 380 25423 6533 6405
279 34091 10937 9056 10932 10878 29234
280 38982 5837 5838 11973 8319 3887 28147 34065 34068 1885
281 30 7 969 5 52 0 1916 6310 36006
282 60806 10347 10072 11845 27720 11848 39951 29183 11852 43803 59377 82944 40268 72640 91529 90196 91123 12129 10986 7797 7793 27835 8074 7799
283 32679 19941 43369 45188 23637 36810 37669 33945 21649 4849 10826 33956 26754 22070 6623 28370
284 56424 45069 62030 67662 78890 78578 7793 7822 7825 12125 6430 11271
285 35665 26739 36116 23848 24085 7868 32819 1916 7250 28461 33316 12768 24147 10145 7239 1924 7161 4549 32865 1490 32291 28436 33148
286 1559 6911 6711 17251 27670 28973 8011 5400 33804 38599 12435 10446 23264 6649 16965 21822 30523 493 27678 17252 7692 36617 25303 6866 12397 12379 31066 36907 7726 36169
287 14903 48423 68987 38598 34750 13027 46490 21179 7583 37915 37916 56082 53848 21423 16691 71057 15601 28800 48064 31869 37066 39604 69719 68918 71037 75473 25523 69720 49574 74519 55873 39667 75490 51764 50066 44101 29162 39883 28742 49765 43063 69670 34777 52283 21070 79297 41153 39924 64051 17739 11174 39971 66288 64062 47299 37061 40128 40157 40036 64059 7586 16613 28784 68518 8102 20616 47348 74495 80995 71924 71933 82339 18773 87636 31073 15373 38556 68479 37065 71777 57876 41327 44467 47362 16579 42484 26542 18131 43773 84779 73923 66167 71925 71927 64074 27664 55428 53873 34098 75934 60758 41792 75232 43804 69677 83418 89847 89233 78968 26050 89371 49164 91376 90982 91106 31834 38603 36091
288 41656 35623 6906 447 26473 21936 33725
289 24367 27287 5198 7506 8395 47176 23135 23134 5416 11657 1087 28449 37572 8920 5622 24381 24409 8261 24407 8737 616 8727 8770 8733 12421 24417 12414 26586 5405 10419 1102 24406 24629 29883 5618 28295 10826 6549 24706 1648 615 34070 22997 24258 5643 8623 8624 52375 8745 8625 24260 11962 8621 33987 11747 5939 5938 5375 28128 664 4210 8632 24416 8633 8669 23905
290 24940 24850 27755 24852 28910 5327 34236 890 8391 2352 18143 3534 8792 23902 26989 27756 5964 14784 18678 1709 56556 10697 5687 2789 528 31928 30413 33302 8414 25428 30730 5546 48212 37717 34527 18236 4887 25146 19018 35977 29168 29165 42238 1034 19232 24853 19192 24675 36865 28693 38535 36114 1639 32357 1594 25169 6352 23179 5950 23189 23182 23191 36519 36516
291 28395 21935 28831 24380 29323 8894 6534
292 28408 28410 3481 32206 30576 69935 21880 40885 32418 30822 53743 43668
293 7200 10806 7222 141 21 40745 10761 29891 5595 35078 1096 29893 24909 6308 29863 655 104 35912 1394 26828 606 22064
294 5277 5326 8842 5931 28943 31950 9337
295 7409 25824 5615 149 11294 11295
296 27881 9345 37016 5505 27892 493 8843 29584 26153
297 432 35256 7750 7307 14214 14073 2374 9723 1591 3061 4839 1867 21575 42606 5801 24768
298 7146 7143 32956 26589 23013 10793 8863
299 693 1485 28492 7243 24354
300 44141 20342 12360 6890 31594 22281 28631 8237 21056 35439 13025 9289 21092 33097 40468 12367 21411 7110 30946 8245 20480 32509 22295 30954 30948 32512 25506 10601 30970 55568 23099 24695 36557 84638 39454 53140 49837 2040 23611 22572 46945 16179 16736 35445 60239 11824 35446 32836 62941 42232 72391 30209 39661 22629 10679 12850 35449 27432 24668 39823 49833 31179 44402 22751 11849 33098 44403 35484 30226 8419 49839 79873 80709 32091 57155 35686 30218 89336 61701 81006 81097 84523 61599 37528 33490 86825 19449 11943 10441 698 5669 11941 10444 32212 11927 382 6910 6974 402 20 12389 36772 11744 45914
301 17 6917 647 38 6590 659 1744 1432 12402
302 2348 2374 35221 16196 8522 9360 710 4826 4794 8923 16605 5849 21757 32483 30999 9149 5629 186 12433 45313 36384 36169 27887 30474 11897 29507 10832 26805 615 6558 11665 8632 6911 24905 39000 30465 427 38946 30497 24258 12202 36168 28294 30390 1871 8278 5414 5622 8623 9558 191 4803 8624 36799 483 8625 28577 8755 5985 28100 28999 4210 8354 8637 8634 13174 13209 4811 30503 8638 30671 42413
303 45959 48258 22353 24141 413 8038 33126 37139 5620 27445 43316 10706 31601 38148 5976 678 1680 41586 28658
304 2410 5795 21660 41511 10468 23805 1367 36378
305 27203 1485 35890 29090 1433 33833 36004 13074 26888 8131 42463 36786
306 6474 29827 54468 7208 22273 44358 57374 28494 21672 54766 7744 4450 11523 9174 7328 2733 7351 439 5115 4768 23038 42200 42504 29161 11777 11304 27771 12071 10704 35953 7748 447 38848 7504 1647 23789
307 62333 46936 4758 22559 31750 30120 46611 48986 21616 7850
308 5101 31319 30495 954 6827 24948 30500
309 35508 5952 28442 28429 7286
310 81106 663 1427 10874 31615 23697 29305 24849 24242 22991 10146 7225 32237 36045 5445
311 22025 388 978 1868 7824
312 6225 12257 6179 33220 1674 33313 40696 12837 6246 5646 33941 38463 1753 57643 1442 8557 1755 45574 6260 35812 24914 22310 32493 53599 1438 33964 1033 1087 11929 31649 50641 22333 33314 1005 22950 28623 33177 12897 22879 1763 42061 11197 31063 1090 30010 707 603 22312 5470 26935 7408 1042 6076 29294 23041 635 7250 32811 5988 604
313 30705 4757 41165 13001 4923 6226
314 4759 22607 39542 13029 35558 33448 31165 61011 7378 5598 49832 24814 4376 32090 24778 39847 29138 32387 43964 70124 69815 6204 24230 57287 56554 76415 36771 33479 5084 20812 60774 59599 22816 957 8716 27358 26697 11689 28910 26748 75 7211 382 8399 24172 26512 978 23696 409 12863 34824 22973 1352 8527 7288 22128 33328 25407 27917 7493 28443 7024 6597 24815 6359 8051 5489 22110 25302 24003 395 6910 52 6076 23015 6877 58077 38791 6906 5614 7192 5736 30721 30480 3 6533 27175 31616 1383 1427 27922 10937 28654 1997
315 671 22048 5399 5370 1871 44 29390 47105 5445 5643
316 47626 39107 19286 5251 10153 11086 33574 21529 27010 42098 25513 1236 42552 35761 36071 1263 27014 4368 4289 48923 44022 4328 13004 53501 21556 32576 39283 32081 22778 32565 61227 50650 1076 55916 41481 5198 10703 5680 5679 5732 31358 29538 27529 29546 27642 10826 8322 26617 6906 5448 9068 27162 9910
317 34774 59467 49145 74634 58836 51951 33489 42483 77705 52850 33451 63280 62363 68205 63764 7556 8697 14432 53359 17832 31850 7572 17954 37999 43233 82338 77712 66213 72652 37067 77716 64908 41631 57974 21280 70041 62366 36624 43772 60189 55622 66215 5875 42491 72384 27297 60680 45215 49289 72703 41823 91074 74886 91523 5837 8204 5838 130 25428 41825 21526 33651 5629 6956 1539 9691 5434 9561 9562 8074 208 10877 7409
318 7224 6912 31564 33906 24835 5789 1658 7478
319 153 154 12343 166 3297 172 8049 186 191 1868 38867 8775 5442 8776 5404
320 63087 72134 51846 87542 89637 87725
321 409 8399 10826 47176 22030 5182 23798 3644 7224 11943 1042 5337 1011 25147 33262 25128 11278 654 25219 671 640 25133 427 7504 29370 105 11982 28088 32436 8869 24152 400 2379 702 23814 5044 8870 4494 3819 114 24168 4336 373 24770 23705 374 4455 31947 4337 28232 24351
322 29013 31036 25052 21957 32801 36855 26756 12026 23833 1091 41539 10872 5453
323 7697 35186 5616 29766 9056 38966 27522 1924 23707 5615 23015 392 8850 5590 29000 12402 46589 7803
324 23974 10826 6307 13064 1432 27138
325 4207 20833 6198 37698 4878
326 23027 5466 46977 596 1673 373 24928 13 374 8349 696 700 10409 12485 5445
327 6006 24629 23111 24368 34442
328 57346 26816 26697 28576 23940 33154
329 61 12407 31774 4596 2688 23709 1546 23023 12409 430 24859 26058 137 7227 37550 43387 8766 22990 954 6533 1555 23210 6060 6905 619 7288 22997 22973 7209 1427 23006 7243 5466 5605
330 26153 33803 373 36094 9040 6989 9061 9071 16 6956 12395 12399 12295 191 7553
331 65800 39603 34770 35728 39672 30205 35056 40193 40102 42492 64908 30256 73694
332 33138 27906 6921 5821 27770 8073
333 17528 45309 11447 3687 3621 26996 18161 10694 12110 23869 27003 33216 4288 45012 28476 41690 4519 4401 4453 38448 36126 23498 45479 36129 44546 11493 7102 41693 41430 38893 31052 11513 41161 27048 42156 40283 45337 38177 46283 41165 43077 9302 22980 35289 47912 29104 44526 44607 3563 33307 25377 25376 55037 25384 52636 44525 2521 11561 8464 39694 44917 42110 28570 27067 11612 12258 42203 91260 91261 55565 10170 6060 28461 26739 10688 1916 8315 28165 10690 23712 31775 10689 2227
334 21827 63335 88957 34854 77232 34399 33793 52056 7968 52368 61837 51968 7415 90193 894 87389 27905 31973 10972 5679 8320 1799 24835 376 34441 35942 1639 29703 53165 22954 12092 12501 10843 26189 1686 24294 35597 14 10861 2923 4887 10834 7249 1622 1919 23060 41477 1651 2439 25470 7208 37341 11 7156 21792 17 7188 31290 10767 26263 12655 25041 27485 5703 1615 29386 7504 25128 25133 1682 25018 22122 8358 1667 11202 673
335 9278 32476 53729 37081 19860 1924
336 12163 21619 4573 37767 7986 8354 29664 24788 5449 8323
337 35088 26162 42136 3459 29749 26018 373 40873 12173 9584 6963 24965 29820 8663 40912 7531 9056 28976 29684 7555 9051 36101 29679 32457 25276 17996 34229 9060 15533 6952 31096 11200 9048 9066 25281 28813 40432 48411 29821 27926 26160 34787 9495 7803 27964 5615 34091 987 25134 34079 5434 26163 31091 31094 29818 6989
338 10977 21761 12125 11218 52634 22062 157 11283 33784 10980 10976 1894 7827 7797 11295 10985 11209 26526
339 6866 21818 6880 5596 8729 30000 21821 5600 21816 23902 36801 21860
340 43715 4199 27577 38770 8495 3359 33730 23544 40416 51520 10343 50170 7974 24856 29816 22995 26540 10850 12036 987 12764 34116 28576 24871 25353 29694 1487 1916 7243 1352 30495 76 32175 1269 23270 1868
341 35211 29364 12873 29809 1792 6544 25418 37016 14073 25185 29806 417 435 6543 2521 28134 23080 8842 8861 28587 28129 28975 42774 6498 32570 5223 402 5599 669 1364 409 6548 10861 26275 8512 8381 5697 23214 621 691 7437 1440 31583 41509 29996 12143 6359 8323 1357 31215 23000 29854 1147 1485 5111 28881 10464 1706 427 8319 28414
342 24258 8625 5614 7430 1871 21955 1920 483 27450 379 42235 28082 743 24908 5599 21484 32483 23817 10955
343 2547 5540 7167 42922 1371 43103 2352 26638 26766 56840 29571 24427
344 1806 21649 28317 25367 427 29560 27742 24903 10826 29664
345 29035 5476 27090 8526
346 27170 1746 1647 7250 671 7227 3 6525 7761 34816 8445 7730 5436 8253 1662
347 39293 51822 10639 30753 35874 50226 28560 58915 23099 4712 22546 23590 4740 52601 30803 52598 10673 39321 6222 37488 6223 7972 34552 35553 42321 6243 52057 13056 10662 37493 55799 10645 33599 77817 44306 26929 47739 35340 66707 51825 45420 1106 41853 5391 9010 60257 53599 29946 9018 36281 33456 39807 23641 66102 62630 10678 37486 39715 29960 29183 61144 40108 33715 48902 46569 46573 11845 32522 33476 13837 51463 40256 42487 23056 33794 86226 11849 12264 22314 7478 390 36960 28957 8061 34096 32840 23044 1239 23045 8 1425 43276 48336 27535 22068 38 7228 5101 10924 32800 6455 7995 5643 23995 1063 4054 5642 29971 23027 5644 1058 37949 24029 22081 31316 8277 31315 9306 5984 23872 8841 70 32812 25190 367 9334 5963 1889 103
348 32734 44357 45528 38479 60267 45803 46770 5101 1425 1500 7929
349 1546 17463 8493 5108 6888 1295 12794 25482 5655 8379 34001 6196 11324 12804 28374 1229 4292 35243 6294 27687 11062 16636 1696 29380 32991 15625 12808 15333 8720 8922 34072 33763 15445 10555 25166 11704 8896 8019 1550 25046 3075 25151 154 23244 36242 1355 33057 28853 5694 33160 13097 28230 27211 8434 10829 4785 39236 6589 10790 24145 1782 26805 6665 31927 26782 5670 24162 1448 44637 12968 21834 21620 1004 12210 25027 27887 53 9309 35215 33051 36102 7790 11974 1075 27135 24767 27740 45489 23983 6732 7228 32860 6533 34435 38923 35204 27188 373 25422 35083 7212 5684 5449 120 1690 34961 114 24555 8261 6538 5464 30507 12501 27170 31614 32350 10262 29274 27883 5576 12377 10852 395 380 5414 6590 6666 25347 1383 37669 8279 33956 5405 1728 31979 35669 28255 21824 1757 24771 30314 6606 25293
350 596 6030 7770 26650 46775 12491 22070 27917 26711 34826 7331 5926 24721 33740 1382 1090 26808 38576 9769 215 30821 954 1763 28529 7485 1381 28521 22068 33744 1034 1435 3 1352
351 40715 31516 28942 31527 23137 1561 7511 6536 4948 24531 29836 5725 21955 6617 5607 31510 8780 5182 23125 26059 5405 8322 6338 5935
352 40343 1692 1686 28480 8716 1103 1373 7415 656 7856 698 151
353 4448 4421 52569 5249 19544 4276 30949 551 427 24871
354 203 2297 29544 7865 30358
355 6618 27889 12333 6604 9068 7803 25219 5615 5405 9059 26529 10 25299 30535 5821 5374 5411 5433 7870 25293 1868 5406
356 29674 34916 8612 111 9075 687 59771 9495 21815 208 29246
357 40884 21892 4785 12524 30469 28924 5449 33907 10831 41 22056 12745 46594 7034 40745 12467 25196 12422 6995 5587 12415 6764 154 12029 427 6556 5360 7984 46 23650 29 5585 5590 8249 12398 10812 5984
358 9364 28305 43894 28152 11779 8872 28586 37623 9375 22068 11932 52412 23964 1806 4838 24158
359 25250 9056 27971 42924 27492 51408 27967 24962
360 118 36049 26155 29641 1435 31069 7562 7639 26160 9146 5597 31090 6409 26018 10950 5434 27601 114 373 1383 21483 43914 7571 29669 13 1364 681 374 7865 31094 11936
361 6443 11009 52634 31835 34092 6442 35924
362 65562 10850 1554 8322 42657 10861 374 11936 114 373 8466 6337 6339 23114 5481
363 3084 12804 6291 18295 29459 18266 18416 8213 6883 3230 18031 18386 25104 18571 18716 8219 4456 12700 18840 35539 45529 12701 18820 21954 18897 5233 19048 33329 6747 23235 6793 8749 5612 5341 1555 24003 26084 22982 22990 25294 7491 4949 26071 12045 395 6921 6617 954 10867 17252 6906 32858 6797 172 186 41856 28656 24778 7644 8781 27815 8755 166 29606 5344 25219 26058 4884 5580 5413 6905 5821 34070 12029 679 26529 1844 5467 24904 25299 31117 23114
364 12371 34965 10024 2485 26499 29602
365 8779 18 7837 76 34403 10837 1671 1670 8074 28957
366 15735 24072 2606 23289 15493 2820 8538 13900 2883 15378 21796 35236 2955 37444 9865 21908 24181 30683 2954 9874 16045 16000 27538 12925 15986 15816 30327 3066 3074 12866 9912 7420 17530 9750 16551 16709 8545 16468 347 15406 27677 30684 16390 8176 16767 31962 33273 4211 21995 16510 20325 20326 20477 16133 9609 17457 18018 43252 61277 61711 53419 49105 20888 23613 29680 80217 43168 9071 5984 6989 24150 6949 27638 150 27481 153 35186 154 166 25123 172
367 29865 42774 40858 42171 32741 22985 25432 42775 6319 42776 42777 6541 3378 6540 22998 673 2410 13057 8258 8261 6534 6535 6536
368 23288 62 23270 6606 11278 26720 30495
369 13460 9093 25124 2090 12325 30123 12326 10 5597 104 29 5579 33135 33136 7873 7206 21 1868
370 7978 8437 2762 975 11777 36137 21662 33831 8373 11913 11910 46431 25393 21640 4808 30677 21661 8320 1792 7492 24495 1649 438 11920 11921 2725 28444 21641 8358 4819 4956 11930 8325 5329 23974 8336 21349 11917 1370 12589 8403 21675 28260 1809 23730 23731 8330 23732 6307 11914 1744 6544 693 23729 43778 24505 13063
371 1369 25425 52887 23049 22998 1377 28063 21936
372 45470 39766 21977 10141 32740 29171
373 5580 5413 31116 5370 32858 9068 22990 5435 30189 22982 7803 12333 26062 427 6989 615 5369 27643 25029 5368 5579 7874 26529 24803 5821 1871 6592 27091 24150 7870 566 4936 10934 8354 25324 26021 23270 5467 5411 29755 6605 8040 5445 23210 5433 1868 5406 24810 6566 23212 23649 5457 5452 5442 6667 4894 1565 5575 9510 9024 25062
374 10146 24149 10 32228 7803 27027 10840 1435 1561 35624 5615 1006 26473 10874 8101 5475 10690
375 24400 28180 23147 27181 28101 27206 8936 28105 10198 26985 24611 8354 5837 5439 34013 1755
376 7410 25028 26539 9149 7803 6690 6558 4906 615 5375 24809 483 6566
377 34140 26693 39368 59905 84747 33477 10922 91119 49 32891 88 7014 25018 537 22041 10416 34027 8885 420 10937 24856 12590 8532 30460 12761 30 5929 26816 24 22312 687 22063
378 12484 25187 1042 31000 22068 5643 24146 25351 1383 23027 38878
379 26477 40916 8838 37003 5329 6340 11317 40729 5961 6362 8488 8384
380 6554 5218 34824 1120 24778 30357 24813
381 5504 31254 40539 26314 26308 36711
382 6128 27294 12994 54997 12837 2105 21879 32209 33807 11688 24079 8017 24229 21899 37383 186 29366 1 6694 7185 31006 29658 44933 7485 21823 23245 40809 7976 659 32891 22312 654 1744 436 25187 6906 24171 1662 1771 7540 21894 31634 24164 1384 12429 7787 566 5649 23041 29640 8034
383 35926 1433 3968 2979 31027 11365 4140 31014 41163 26421 47875 23091 26851 11468 43443 48404 34109 38807 7086 32294 9269 9278 41521 12816 37113 4519 3497 33583 22980 43041 3930 36832 11557 1325 60772 38443 64199 24552 44774 52635 52644 30807 42070 63259 11568 53417 24643 8976 11575 44636 11566 24394 63502 12259 66371 72505 26982 13128 44752 22872 53183 47636 77490 22904 2517 24434 29511 5261 1503 7292 25532 42403 10706 32236 38965 1387 23705 386 33738 8445 32238 25010 24010 33014 10754 28284 26651 10826 27027 1078 31115 35622
384 16423 8190 17717 3813 30880 18875 65701 13007 25116 33281 20146 20727 42334 37144 5443 33 33134 25161 12333 7803 7874
385 10 31130 25393 8340 403 23409 23406 23134 23741 975 11302 24368 1364 1642 527 1443 1311 12374 11 6689 28830 8437
386 12278 5941 29088 1623 38541 8837 23072 24519 8831 26714 32187 40396 38207 46163 36522 43609 40284 747 1145 7406 31321 38031 36523 8 33954
387 46434 241 8619 118 10807 1013 75 38106 52 10172
388 21820 23338 26072 23340 8725 5582 8631 24947 12418 5600 5596 27642 30524 1592 23328 88042 29366 11665 5614 12377 33001 4323 31551 32422 8729 8822 24814 23330 29000 6911 23343 5607 1555 5446 24905 11279 12335 12334 26115 23331 5405 26080 5368 12402 26073 29377 12202 12343
389 19269 30208 6890 30644 10388 46591 22649 23611 23484 12354 9276 23615 21164 13046 22631 4456 32755 29926 52441 19690 22305 11837 30200 44073 17312 32105 51985 52154 23637 20351 30976 21600 23631 21257 36560 30207 67724 32513 49876 51341 25388 12840 23643 21953 20987 61250 41214 33467 19204 7950 18938 40037 19643 19986 15431 23509 30218 8130 18897 26362 30232 4686 56917 53721 18275 21261 20476 38231 3627 30248 68001 647 5682 12324 6559 6551 1533 36515 35230 28122 5607 32212 27798 24003 980 7856 8758 99 10692 12317 26802 32361 7205 21827 5951 30721 1647 37670 53413 24149 27291 5218 9787 23182 9385 27153
390 24198 6212 4067 35315 11837 36810 39943 11162 8427 31503 6530 26481 36513 34253 562 6017 35689 29751 29753 12167 8322 21526 8357 31940 17928 41974 673 8261 26644 27802 6094 72 978 7486 643 8757 6022 30189
391 10805 21884 145 7990 10812 33111 4086 9712 28919
392 33416 24205 7203 24948 34559 33142 37080 30831 47 7405 12276 7798 6827 74 26697 6914 21973 211 28576 35394 12467 88 237 31320
393 65 13092 678 118 11943 655 23965
394 22062 6918 7815 11270 12487 25591 84 11266 30566 12125 10811 24592 25544 26526
395 9871 475 15842 13 3104 16021 482 31302 24775 24768 25134 3566 9056 34289 31065 34227 8089 21794 10427 28813 7866 111 7873 26021 5434 10878
396 6437 6435 6436 11262 25605 8094 6434
397 15833 33672 5095 30687 2955 9190 62095 5087 31657 10041 2800 5114 16322 34460 41289 1814 16404 23385 16378 7300 16546 30692 49148 16767 16718 12568 27561 8173 16640 26258 33275 4682 12547 37498 22006 9221 34111 29093 78 7199 23802 114 373 388 28538 28830 26697 393 978 10061 38072 124
398 6753 5300 2523 662 1002 7324 36365 310 32614 13435 7883 5058 25069 23641 34409 23793 20 5433 5821 5375 1924
399 12917 41338 30369 6498 10797 24877 1115 1125 12866 81 175 34171 12318 52609 12440 12995 10788 325 7540 119 38 24120 7203 33269 211 27643 3 1384 49 29359 10826 7202 9334
400 23596 23595 320 4940 46319 23597 43325 13736 35413 6246 26229 27668 37493 79 9334 6883 13056 37489 7891 43454 23601 39921 30991 13047 1866 23615 31000 66347 35561 10622 74158 35461 26767 6267 30652 64 220 28788 38916 32760 65521 5578 180 74944 5791 54203 25005 42911 14023 78076 31173 5358 10654 12839 8215 545 33714 33721 36278 73892 39482 15265 57584 56917 25388 23643 33902 42040 15129 63230 7919 73735 33469 39920 44075 80240 29183 13445 62016 38393 80613 63638 32699 54904 30303 75510 74772 78442 45814 51676 36767 21491 6293 44202 59599 68252 90114 45582 91002 48984 81930 5304 90948 10909 87916 72639 7225 16584 6884 38917 5225 13426 1788 24773 35689 6589 40421 23793 5780 37655 36772 7853 23999 8342 29624 2521 654 43186 32216 23288 30267 23264 40343 21845 1555 28924 27522 27674 25294 34024 12398 34025 80542 27638 10440 32220 42846 8729 48233 32131 954 21804 7982 10867 5448 8598 5585 10937 5404 7500 26886 5587 25226 8619 21848 86 5476 40424 33667 25146 12422 31787 6590
401 31329 23827 25328 11214 10981 5821 10979 26016 28498 10973 11926 12124
402 10654 59997 10684 59648 30201 26230 53606 11108 35870 48420 46803 24589 39964 24472 64170 8150 42703 67724 77574 36560 18560 65625 56802 77035 85569 14537 54851 33468 46563 54441 62895 40092 45649 18488 56541 40253 57691 59075 32531 49787 47319 42694 69064 77410 34651 54957 53870 70108 57618 55300 76329 66167 19157 57590 84219 56232 50047 63992 77462 68643 69076 68644 74686 82958 46402 67041 46099 89638 80217 70109 90850 6890 39484 21240 12356 69075 33506 57633 46094 24473 21822 28408 28216 5591 994 41426 8612 5201 41560 47395 23179 4890 27165 30461 5925
403 5979 29127 23179 26521 31497 1809 31245 5190 28156 41341 28424 42141 7480 42343 1775 11314 5694 7412 33944 24995 12294 45735 5263 21468 28492 30722
404 32759 8543 34552 12843 6267 1835 32522 33705 27327 34556 15691 43247 29480 25326 13047 10637 13008 33707 17387 39740 36279 33443 12372 33714 21547 12965 39188 61842 28880 43424 40125 35090 27072 49660 22272 13048 73187 11848 61 17 160 12273 5405 721 116 6827 30477 773 5602 46 8621 1383 9056 5608 118 8625 5615 14 132 5579 7 566 1539 5597 1355 48 954 667 239 22032 6865
405 28642 13056 38189 35889 10137 30307 42543 33702 26644 72279 27064 27062 28645 13092 1180 12892 32619 43399 6465 9018 17458 53599 39837 39763 27697 32381 7924 23634 12144 27723 17 28431 1414 5662 7730 7856 652 978 1432 8619 7227 1078 22170 34260 104 656 8533 388 1380 62 26589 390 7478 55484 5654 28949 25535 74 39073 48313 1 1679 35008 6327 13 1413 8482 23013 1359 31366 23307 28822 42268 5420 26879 6354 7980 43733 29277 34110 662 5966 12276 6315 1353 89 105 7228 5597 34281 14 1364 28226 22122 1924 7190 28253 118 8526
406 27083 24260 59135 41922 26473 25204 8260 42709 447 27113 5751 38867 41235 30608 42267
407 39594 56907 56112 35053 39541 35886 11829 43910 43454 10392 46785 12850 52691 49894 73339 32755 23629 36700 33455 12259 29940 34605 13031 12367 52905 67957 44074 35373 62721 29944 32526 31173 44073 33250 10686 80178 61270 46766 32528 63232 33456 30205 46811 39879 88226 21600 48421 950 33020 26210 29955 23641 34135 39779 7687 39993 29954 33458 33466 33714 57584 40066 29959 46557 33461 25388 45622 26690 44390 45284 35562 38914 33469 50089 33471 40270 40241 80613 77820 90111 31713 35564 73865 57291 36643 83588 77040 40056 46553 36890 54027 77270 35686 33476 44467 11188 57284 44469 40235 29966 57155 25038 11861 29968 45581 33505 37604 77619 47140 37537 51766 33485 32622 73866 26693 71276 46585 38913 53017 76848 56918 76415 57867 30256 83766 87917 38231 33511 85618 7971 85278 75659 21551 35577 80005 684 5654 388 31298 7478 27667 29662 6612 23695 24260 104 29366 22065 32824 978 13 1585 5607 8616 119 395 8749 24205 27740 5383 31319 5586 6906 30189 1695 392 7491 21894 29748 56 10818 1796 7982 5448 1383 22050 40424 6528 215 14 45964 74 30471 6877 6289 137 22064 23263 656 23261 29877 30536 35461 5405 11873 7984 12524 1599 7024 25293 5476 58689 8 6827 967 773 6618 10 29416 5435 26576 105 1549 30529 278 27924 25029 27892 5414 5579 6592 1560 21841 30534 120 239 27091 1870 1069 5411 5467 26537 9068 23270 5604 27911 30525 5605 6667 1565 5452 23212
408 37341 38072 102 5971 29693 1364 23243 13059 3990 23186 383 31626
409 6258 6215 41514 21136 6203 30340 33977 33102 41901 43396 11817 6208 33132 1339 6199 65075 8425 233 36082 6262 50711 9575 62547 47427 5418 10592 33924 55907 22307 6548 32755 30962 44836 32389 41138 46811 65562 1610 63839 54243 75007 37414 34441 28910 27906 1038 28135 41541 8404 6333 641 23044 21476 27897 28597 35642 35101 10409 6533 28886 23050 33954 1075 34024 6076 5670 21632 35948 5977 1480 27435 7225 8411 1087 6097 4788
410 1328 33995 674 11769
411 9497 68802 49405 25235 25280 27972 27901 13412 46581 25278 25279 31959 39099 3086 31838 6274 38427 25277 9541 39052 27370 34097 34320 25268 27564 7627 25273 7528 25274 40356 34079 46819 25245 41550 38860 29638 34205 41546 41548 29642 36098 7639
412 53649 38142 28352 12944 3389 43978 1263 52577 40353 81151 12372 43249 5463 6911 45963 46590 30407 28880 49656 90949 8539 29667
413 635 12949 3904 1355 972 68 44
414 66808 955 72038 66997 66331 51770 33479 32512 69600 30239 958 12167 31257 8444 29986 10703 35459 26593 33787 23140 35458 23116 22981 1410 27449 5198 30140 4949 1590 5340 964 3629 4948 36002 12855 27917 23176 8315 35460 5416 8433 26585 6626 5491 23130 23110 40716 26511 28312 24142 29382 33786 28823 12291 954 21612 5344 38316 21604 33186 40718 7487 33127 29545 24563 32916 23132 962 24763 32256 28677 28578 24423 35662 25219 27922 32291 17251 27016 35663 40715
415 54294 63637 32055 34683 45865 7943 42796 1318 24668 62298 39280 82486 86080 42002
416 43081 38300 38575 11890 28435 11784 43348 114 4119 10763 23228 1421 7233 1072 6997 24403 23046 30633 24564 1381 36523 44568 42863 24928 23965 24864 41329 28829 26696 1389 38789 28850 1370 5337 36362 43082 11891 26820 33118 187 12290
417 37552 7190 24246 32229 10749
418 52447 22838 48744 22779 46559 26212 30258 74373 22913 55004 50641 38230 78373 90893 89610 38229 44104 30256 6666 7866 23990 27964 31310 24229 7186
419 10228 43 7975 1926 25183 160 145 31506 661 10833 36135 7842 11688 32428 241 26751 45605
420 9056 8278 9071 11665 191 5414 5431 28921 26021 6954 28100 12395 12399 12295 27789 29744 24149 644 9024
421 25523 28815 56758 7563 31957 8322
422 10836 28973 27663 23674 28979 24141 26846 28980 27710 150 28981 153 28982 26153 36094 33803 35286 3990
423 5101 32800 1647 1235 11649 10146 1201 23026 1200 26808 29885 1084 24093 7225 8526 10843 5642 44387 70 24146
424 11217 10273 7436 54282 81606 59426 66418 27252 41002 34726 49315 49274 81184 81186 82008 45857 36262 50477 36698 53929 761 5241 52136 22431 41570 49749 62717 57443 54265 65037 67408 45837 29119 32663 23229 54936 47023 55863 20787 41597 67313 54746 6806 6977 31575 32509 34369 763 22532 1316 39392 7014 10382 63264 22300 72112 34547 44661 22301 48609 35552 51891 39169 33530 54295 35082 41848 33433 62335 41851 26393 60801 65045 49758 35842 60023 48708 43059 10907 22267 44670 79356 26626 890 9009 20750 1993 51257 33437 58057 6247 38575 29686 36986 36681 27380 51265 28192 24471 11150 80218 73920 53817 44306 17200 42005 11164 39726 35147 26185 48296 8870 12016 50156 4524 3500 215 9472 1025 65235 379 8705 7228 6923 596 24721 4296 34287 39754 14860 6455 2410 47032 6911 23074 65165 48225 48229 61064 5252 24601 39902 27317 42518 63335 21471 28212 52745 55402 43020 8794 47695 60336 7809 1465 29390 28320 8781 38236 12871 26755 5725 30832 1666 33012 24883 23029 1427 1653 6528 23036 177 48 8704 9645 120 35421 40 377 29743 1428 427 24928 1359 14 30668 45298 31963 5370 36155 696 700 10409 12397
425 28853 2749 31617 27771 5444 23979 1169 5281 22128
426 18465 2455 29615 38155 45576 46727 6130 52352 29616 1007 3626 24368 33984 28942 1775 28129 23804 1382 35892 8360 34201 24577 42344 32349 32584 31232 27095 9572 1365 5203 7782 27802 1405 681 28939 25399 1104 1441 5750 1782 26966 447 24316 34439 6398 34442
427 33741 55 6506 694 1073 48553 36790 660 103 1653
428 5114 17073 3494 16304 23479 38549 3674 382 4292 5784 8421 12700 19189 8221 61819 28990 28880 35451 7979 8323 33810 12333
429 1368 48 23965 11199 10951 11782 7409 22025 17 22368 3 5729 30832 9148 30440 38 26703 684 25214 36565 120 149 11 105 42 42863 21 10866 27484 1870 59 8626 23059 7793 5445 7331 6859
430 25252 29260 27362 5602 29678 52614
431 8676 33053 28657 9559 23159 483
432 53559 53519 67620 3537 21130 30540 33099 23521 42232 56900 16821 67399 7703 38131 31147 35686 2379 50764 68942 4717 43741 5182 8779 6828 6599 25171 12524 404 1537 28295 6598 7430 7726 6359 7990 42412 1554
433 1689 29525 30840 10200 1448 10826 5693 28857 30501 1444 33942 11902 43809 27095
434 6921 29693 7829 5607 91 7745 24463 5405 6797 7701 32902 6966 10867
435 11865 53978 36082 6264 51519 29420 41861 25158 57985 640 33011 39893 33666 89899 5922 35574 52682 30218 22078 6544 1468 1414 37755 28284 24998 1424 8432 8488 30476 12436 23233 21491 35535 24382 28357 35671 37016 6523 41135 26498 57090 34069 26662 6344 58689 32209 9317 29430 5702 23105 22040 4 37507 52207 7 37004 6528 55855 1624 1672 31322 24137 30523 6509 24823 36616 7832 8061 30455 31315 24721 23200 28260 28157 35914 670 8056 7407 5654 603 23206 8855 30738 37383 8319 47393 33009 652 13068 33950 29897 8399 28480 1 22070 23459 34096 11945 28159 11655 22030 23654 7504 57645 23541 6538 27108 10750 31006 8368 23961 23994 12480 8936 35917 28579 22074 25032 30837 12265 5941 426 8481 29971 5729 9367 7787 22026 24893 8391 22992 12122 10935 4849 10413 23446 23027 23448 23460 23461 24819 33808 23427 5415 12124 23441 1873 28824 28583 1771 1618 1427 12296 26759
436 53492 24569 23494 1914 24605 26626 8531 38829 43764
437 29135 29603 19791 65551 35767 40534 10866 23898 6682 48906 27770 40994 21750 23909 21741 26809 41659 42139 21498 683 31887 12770
438 11693 1748 8886 632 40423 28260 1063 23782 29038
439 36967 60463 32613 28187 26562
440 23488 18163 18189 18231 4102 4264 23502 18726 18727 18757 23510 4440 32722 30603 19180 35412 1299 19486 30904 60239 19680 19690 23543 20660 20721 20803 21097 23569 57605 9484 24236 33134 5579 33136 27090 7872 149 33135 53380 38597 34290 51408
441 16065 47721 48057 10583 60772 6177
442 35678 30497 11071 30474 27887 14952 22428 8363 40743 28179 9363 3559 2754 1275 4387 785 9402 52344 1954 19269 28306 2662 9662 47817 27227 3805 7775 6060 9319 5986 28473 7264 33811 7975 675 5940 29505 27679 29274 21887 7292 59 7287 114 373 32821 7243 6324 6589 23829 32275 28161 24418 38456 9312 7289
443 23580 26863 33408 26357 24755 23936 21157 21180 906 43768 42475 41482 42594 40401 13159 28748 922 44665 24667 10394 29148 7896 30230 39850 47258 44129 55594 64908 42395 66905 89793 89794
444 25169 28123 1714 1649 401 397 21650 28127 33934
445 9583 11213 44 34225 34226 34227 39084 7146 32282 10979 3464 57872 6909 9056 183 48411 25591 35075 10811 12125 21770 21793
446 35787 35790 60727 53893 45097 44312 63287 7612 65855 63285 73426 44323 60726 75465 75934 60705 12470 5434
447 74598 46230 57407 69678 84437
448 47679 43772 51622 53355 7525 29
449 1063 34566 28591 23966 7228 7243 29413 619 24423 12776 6657 10707 1344 5329
450 19791 12588 69327 10822 8155 42900 10812
451 3353 35630 1707 12755 1625 28910 28827 32589 32584 8925 1006 691 27026
452 64756 34610 39542 55459 39112 34393 7471 1438 1465 12279 669 26286 25026 1373 30663 10704 11651 43273 9319 12479 8047 24154
453 1065 28911 1682 1387 1074 1035 5618 12165 3305
454 23375 5116 3785 29739 7514 10797 12876 8490 1049 26697 643 647 1563 6827 8781 954 670 56 49 21863 669 7227 27695 10814 12435 24814 21860 21862 21859 17 124 6528 662 215 22995 11279 8705 42268 28576 1352 7726 76 5616 22990 1561 5437 28830 24778 14 967 5417 29 38 1494 1492 12299
455 29827 24135 21526 30391 29684 30317 390 437 7499 1402 32882
456 959 4936 6623 5584 1541 5433
457 8869 2379 24152 4455 5449 400 702 8870 12871 12873 705
458 43407 38 35075 44987 33971
459 27499 7045 668 31571 26178 5698 27916
460 28045 46427 37916 12847 11174 11169 70554 40986 33996 8639 6595 5632 226 41582 27244 150 5570 5571 5622 10492 25344
461 28078 11307 28911 36800 41029
462 1211 10709 27107 6448 710 712 36225 44651 596 25061 38203 1065 12028 5998
463 50484 23823 36726 56311 54440 47638 41460 83537 83536 23798 5111
464 10160 25052 41859 29010 12766 5937
465 33916 22996 21476 23985 35938
466 31893 1710 33602 1673 32171 55916 2872
467 64702 7891 7898 30307 2045 13038 640 34217
468 11545 12501 24567 55614 32625 5506
469 55288 42896 47823 57976 7949 40277 59659 42222 40177 42367 70541 58904 74916 50539 89260 50651 44918
470 32565 42398 42254 32398 45581 61457 42203 45584 50589 7726 10146 7984 28575 22110 10 7761 23989 1435 7210 12489 1006
471 10904 3263 43401 23915 51291 4164 3397 3261 47622 43526 52675 52673 43527 43529 61187 6549 35669
472 44675 16847 28675 1858 16991 17031 486 8085 17970 18245 18220 4265 31556 2879 19223 36938 25109 69885 81021 36429 36098 41546 27988 31077 38590 1593 31941 53787 9067 42800 41561 38063 37744 21747 21748 21746 6549 9147 9512 53786 6322 9046 32900 28300 7410 9583 24765 31585 7002 25528 34087 34085 44179 41991 21905 25282 10 5579 45926 57872 15282 40697 27365 9562 13209 22122 27971 25287 9111
473 13013 18581 21478 5982 5985
474 34160 181 5370 5400 28324 47106 6647 8820 43505 36431 5433 1899 29755 1565
475 392 5586 7409 12118 6954 35924 7822
476 2893 41155 37382 8946 16215 15332 3026 30685 46934 40732 10936 3179 23442 11051 32733 5812 10501 33385 28871 11283 8284 11974 12120 8069 25328 35891 28461 29003 38848 34448 427 394 24943 2379 12123 12124 25569 9977 7828 7800
477 975 8848 12657 26300 8774 45316 26561 4885 11983
478 7891 29602 34128 3911 1356 1916 3177 7927 38914 444 3741 32798 31012 12266 11907 24946 394 28157 10705 12873 28232 655 12863 8716 643 34961 23423 34815 43383 40 29436 7200 1634 26169 7042 29815 658 639 114 11755 1063 10439 8526 373 13 27181 28101 10198 409 374 8740 75 27295 11771 27320 31353 42503 36399 31357 27343 12278 28444 8395 27324 8354 640 1609 8012 10924 1647 22065
479 28658 12320 23701 28975
480 41342 8248 55089 44655 24115 1881 2930
481 30340 2607 32955 11479 32973 11349 7157 4719 11442 25513 48746 4002 11072 11440 26947 11525 37081 3727 886 11502 11499 3676 23232 43443 3705 59535 11485 1245 38047 11526 36132 29008 9241 809 30106 35128 9269 11543 38433 46109 24628 28688 6212 3972 23561 31046 11600 10265 11523 43163 26961 11522 3732 31194 8269 46515 11531 11557 11619 11494 11566 37629 40776 11500 11538 11549 46499 40780 45571 11534 11555 21682 54766 38473 23585 38447 55055 45573 11529 39381 11471 35097 36216 4195 36130 11497 50120 11550 73431 38480 42199 42198 41554 35309 11537 11568 46106 10701 11578 47936 24422 5300 23647 38801 31615 24735 25010 11305 35099 23705 35624 30766 1918 5970 7154 7177 10173 23830 3980 28458 31935 34120 23646 41334 12215 29389 23237 46251 7149 7141 24082 7139 11372 10860 27029 12655 25302 12225 48264 7140 33739 8031 5955 35936 11331
482 29978 6352 11878 22983 5837 5838 42263 5964 8378 8380 28446 379 33317 23697 35961 24088 24202 26593 28281 28662 1374 23036 26924 23006 45877 30812 30264 12030 35937 33923 6530 58689 13063 6340 6002 1587 28216 4898 6346 4797 38850 33552 36827 12644 6811 25472 24147 27142 8801 13107 669 47698
483 673 38948 21650 23600 10687 22095 7746 7731 8850 7753 8837 24174 50554 30350 28049 5653
484 24417 24733 24835 32214 38398 28971 954 6299 5367 5103 186 22990 987 33948 10029 7410 25403 5615
485 374 38313 26808 32780 7991 10419
486 9663 335 1031 9638 26593 6506 8251 2283 29594 14135 220 8676 8140 27180
487 7991 1006 50757 34480 1030 33744
488 39314 12361 10622 22297 22304 22305 30979 41402 28994 34547 30976 10639 10654 44144 41309 21586 23629 27432 31861 10684 33441 29940 12369 39880 61293 28793 28820 3420 33909 1806 12761 34231 29696 5629 670 33072 25294 5413 5579 25197 10952
489 42768 13551 15321 15673 15732 9538 72075 34623 13330 13592 17116 36087
490 5615 3494 6750 8395 17642 3669 8208 35471 45578 15436 68420 27068
491 28186 23441 33945 7479 23461 23467 45124
492 39963 40102 7947 40214 55963 7891 35451 57295 72038 33795 33479 36771 76415 32407 59905 33794 33488 44079 38231 62325 85618 7950 31326 7637 1559 4949 6828 12335 26058 6604 6921 5762 1574 5598 26559 6616 23707 21491 24930 23710 26538 24002 396 33328 12408 386 33127 5577 6793 12202 5616 28288 8051 6597 28999 1585 6925 6911 1555 24905 23210 6927 8278 954 25294 26112 6906 23697 987 10867 9422 12334 8749 23013 11912 6905 6603 23149 34154 604 1544 33849 6827 29876 24148 385 31115 10707 5476 1603 7410 29366 23051 5370 25219 26062 24873 4884 7803 7726 4936 32481 8741 25433 6605
493 19061 48742 54988 39603 39539 10130 51464 39848 26691 24905 1251 23235 26538 6544 27131 23013 28654 34154 6514 1603 5413 25219 26070 5604 36133 37442 8051 38110 8785 5369 8040 8004 12409 15282
494 23049 13078 6521 9572 11701 11704 29832 18097 22998 1367 697 29836 13097 32741 6329 6522
495 12274 7478 393 11 5438 11334 24393 10165 34447 1926 8437 23015 374 33992 8322 6924 1010 5473 379 2426 3990 12036 1402 12329 10 5476 975 11635 7190
496 21754 21739 21741 374 11936 21751 5829 11880 6286 11879 13 114 56394
497 4795 1692 30316 7504 33262
498 20742 71340 30854 43607 7702
499 66036 149 11295 8074 2177
500 36100 26163 28813 34 37939 5622
501 665 33758 1010 1006 25052 7786
502 12927 22362 3000 43157 2695 463 23370 24440 2977 29070 10251 5322 462 9205 6136 11421 24745 11402 8910 3239 23381 11443 24498 4201 3639 3785 4030 25117 6920 12224 1059 30034 32255 34437 1433 35099 5300
503 25039 11889 35583 1438 27115 7986 32896 31456 8330 8716 21657 32072 379 5694 395 8729 1543
504 42557 23629 39726 10684 23937 33704 33707 11835 11156 40660 3173 39952 55922 39888 36285 29958 39823 11152 43239 40027 43456 39871 29172 40259 40678 40167 22938 90078 42365 51677 50538 91385 42366 33506 88547 8532 6069 8893 36907 7027 8675 5703 36799 5694 5406 114 6590
505 37037 9468 10797 18386 31269 69848
506 85968 42696 78687 62822 61482 5414
507 34333 20515 8217 18850 10328 20566 30759 1835 30779 56637 10347 51988 10609 7125 21336 11532 21069 30702 21220 30716 32515 30719 22308 58331 35869 36413 20809 43454 33699 11827 24196 39586 35728 10681 42005 31569 58709 39588 33707 39422 37174 23637 33713 33714 39836 36701 35056 40058 39763 29183 11153 35563 39820 11848 39733 40194 37563 29172 46564 40110 43456 43457 27720 40111 42259 11860 40260 4111 57157 11196 75660 90797 57980 59386 35066 35576 91121 90196 7810 7812 7815 6906 11270 23828 270
508 33 721 119 76 14 8619 89 57 683 354 5597 239 104 22046 6918 670 10798 73 6827 32774 24948 6856 188
509 11713 43176 43181 22985 25431 25430 21938 10468
510 74812 55041 21958 30218 59357 44469 12418 38229 23640 38230 57895 10246 59362 40260 3374 70373 23261 38231 30219 77109 90277 22263 77122 39916 33488 72639 6580 6581 1541 1546 1563 24002 9422 1603 10826 32436 4936 5821 5341 6921 6793 5433 6292 6623
511 23269 22263 52079 26588 129
512 25061 28963 31618 31498 5470 1712 8937 30794 4622 31616 1230 27489 1685 26969 30488 2501 8916 1716 129 22139 39710 30310 22488 24842 36353 1694 2254 29002 36996 1062 5966 5473 1751 1409 35647 28159 7737 32214 34816 1804 24161 5466 1182 34817 5371 35892 46615 42434
513 9056 29684 27482 55826 7553 27945
514 6731 6559 41280 673 2410 13057 5228
515 33549 38461 10153 33148 29603 41012 36855 29081 2749 12169 30666 12622 36817
516 7491 954 6906 1355 6275 21894 8861 17252 2842 26880 5377 10951 27883 23748 8089 1352 25215 25217 46400 28253 7500 721 10838 29606 6623 8702 25219 5476 26540 26738 38 29 10783 12029 41 1492 6592 237 34254 968 77 566 6507 668 8040 5433 25010
517 10505 16050 30518 3242 16361 32596 16403 10493 28709 16397 16487 23402 16629 16631 28027 3209 1048 17761 48422 27904 27639 5440 10470 22067 32220 53786 32746 5388 31000 28365 6985 29237 29673 27985 26886 8277 27951 42372 21764 24332 5414 34085 30390 1560 28273 21874 37348 21478 37736 26020 10878 22073 5422 22963 5437 23649 27932
518 12274 216 38 27786 10932 29877
519 23698 5677 1658 1713 38431 23114
520 26738 10861 5483 10871 28572 3385 10071 11936 36827 28436 10837 24147
521 1014 2688 3819 26653 10099 1201 5618 7518
522 32426 35862 6237 41863 29929 6225 9489 29932 33141 41185 55921 33698 39321 23619 11824 37400 33630 35873 39511 29944 53599 39761
523 6203 33592 23977 8436 1773 22321 49633 44335 56016 54904 4767 4554 28963 33172 11649 8017 1075 22312 12275 23031 46400 1698 1727 44278 696 22984 654 38055 24029 24928 1777 1068 7991 5414 28953 41424 29429
524 12378 12379 12403 30380 41473 395 12415 25219 24165 35258 789 24154 1665 1707 2379 47698
525 31576 33135 29260 26162 191 44384 25124 5434
526 29516 23809 23147 1096 24094 1629 34177 26708 36225 1438
527 1180 7331 8310 8366 8258 28823 11701 8322 26751 24770 1438 527 3353 28827 1452 5618 28279 1791 28281 23804 8732 28386 403 1646 12913 12964 31614 395 12967 12973 1662 26737
528 23805 1438 23651 8471 1180 1874 36798 8556
529 29620 6359 6030 23181 3670 975 395 12167 36156 29538 29546 33603 10784
530 32492 380 4337 1372 379 447
531 6795 395 6575 8780 58077 7491 1585 26062 30189 7979 27109 9422
532 54196 27917 978 24788 27880 11
533 1364 1008 29687 693 24157 10948 684 6506 24826 7408 1626 7208 1658 1332 8867
534 40527 728 33195 28497 46629 12165 29269 28434 46394 1104 5277 5276 21624 1670 33981 8304 33368 10866 10828 28325 658 1006 7239 28455 33755 24147 8101
535 34180 32046 922 45960 24668 32086 55043 34610 35793 12850 51783 32090 45375 55401 40241 50651 42529 68763 29366 24376 54251 6747 28356 954 12412 7982 404 5615 31583 24811 27051 31138 31931 395 664
536 42441 39283 32117 35727 39848 39865 25518 39981 28203 48347 59659 29197 82180 82181
537 6523 5667 6316 34008 693 8557 5927 1803 2240 8263 23734 8841 1799 686 10457 12442 4823 6451 5717 463 5250 26885 11744 5134 27443 13017 28165 12283 545 53178 1968 28091 38541
538 46725 13004 6220 8919 20562 12843 23711 26641 7338 31004 8347 23770 7243
539 15335 42130 30644 58745 55783 7894 40121 18968 40262 89873
540 10982 7825 6441 7809 11214 25539 25824 6442 6436 12119 6443 23828 21759 1894 12127 12126 12122 10811 12130 52634 10981 25328 11220 27732 10980 11294 21761 11212 10985 12129 11295 35924 25540 8074
541 9020 5950 5190 7746 11885 656 24143 5385 35937 43375 28178 29350 6530 27750 12382 29371 1450 6362 25325 23200 6910 32220 34619 42264 551
542 39193 23169 39194 35484 47080 71536 54616 66116 39210 50581 39215 31710 56848 39199 44426 39200 66368 83563 39203 64820 68222 39209 949 64378 47187 42824 68424 11857 75966 42802 33966 5344 31141 45914 33938 415 9 8334 33386 4797 21786 3165 27244 8633 39000 45131 150 1795 28163 483 12601 166 23997 7413 1562 8054 26084 773
543 10798 968 120 21874 61 59 655 5568 38 10814 7198 46322
544 5021 7506 42525 28292 5771 10957
545 8257 23021 24484 24815 10146 12377 26080 6600 24000 26115 58846 32480 26697 62209 33156 615 5113 23696 24380 427
546 1 10692 7730 27025 36060 679 37697 24689 659 1344
547 10934 7870 5434 5433 6623 1868 86 24810 5457 186 12423 12320
548 5652 7338 36356 180 25456 10153 383 31340
549 26756 23779 3391 33395 8897
550 34279 9334 12473 25163 22255 8509 1042 25343 29016 196
551 8504 6929 11755 41858 26714 37003
552 6127 15312 8952 21637 4829 5716 6100 12458 11748 9013 4684 5733 35530 9436 15018 41421 5114 4664 3200 5235 21502 9899 53973 12564 33957 26765 35083 38043 5439 13093 34126 1438 1683 16067 33940 3571 36493 5852 2639 38147 31833 16966 30856 11769 24713 6320 15265 22261 16915 6054 42981 2025 30684 3487 33205 46159 42210 5930 4699 31468 9226 3509 15882 8797 4417 691 33938 1816 16302 27210 24169 6927 22990 35102 11 11891 5466 1433
553 52152 10693 31710 34907 45367 58818 22983 24895 41859 24847 23050 25148 38288 24851 7211 36428 24856 1 24866 36166 30774 24886 23006 9160 27770 5988 143 32186 24386 1352 42403 1916
554 51244 10909 40243 37428 40049 29946 86880 37417 51296 48986 88281 82045 84932 42531 31509 24413 5931 13495 23789 28129 37941 8318 2525
555 21934 21471 4904 23187 12121 7504 379 5326
556 37686 5437 5642 6667 5369
557 32515 40591 11829 43645 35886 34135 42383 33493 33534 21187 40052 32440 75336 22306 6869 33485 82414 57293 39610 29416 104 62 10814 125 10953 86 228 198 42 22058 30 6856 1384 0 22032 1870
558 20872 69409 7562 27841 72959 10986
559 8054 4688 44165 5767 11117 71940 23363 5506 1459 28668 33162
560 46431 29583 24495 8722 3468 34506 70422 12279 27802 6314 1787 5441 24433 1224 1792 11933 12589
561 44678 40699 11933 33982 10749 7250 26749 8092 8827 35894 28668 11670 1641 10708 37587 23843 24825 21625 22072 16937 1046 7868 10689 46159 26575 7240
562 33411 31914 26961 4764 62204 30795 11532
563 7995 643 6076 8322 33005
564 42643 31514 24676 33746 14771 31507 31509 31510 8428 8318 32357 28322 1567 8345 1794 9334 21499 392 5586 39237 9068 1613 1639 6670 24728
565 11847 39948 39849 39913 55109 85505
566 19780 20019 73071 43826 15874 17796 3637 78769 15346 49142 7551 26018 29684
567 15932 66590 14037 17384 5790 10502 39055 829 23474 12986 32977 18110 11063 82847 4064 12803 18358 26951 31442 36803 11069 27268 4228 18329 4302 18936 18585 18645 25140 17022 18695 19072 10538 27901 6157 32223 43711 21529 19638
568 7443 26697 7904 4895 41029 21626 24348 4929
569 28466 30490 26739 55737 4549 38963
570 874 41192 38105 43766 896 900 45216 40949 7892 7895 4205 44336
571 1794 9047 6429 34919 31091 6409 9049 28921 48156 132 22058 8461 8368 6510 7476 5690 1567 24095 57 172 43808 5632 9787 31452 1494 9500 7815 150 26880 8318 10492 9052 31312 32131 7 26152 186 27770 26527 12303 0 194 5622 27927 537 9056 27647 31939 25041 33814 10427 27950 25217 24948 17996 25134 25227 226 86 7529 9162 34322 6413 23674 24348 5697 6523 621 33938 658 28366 5444 1211 24848 1212 9028 205 7028 9068 21894 31093 603 1120 29295 21805 6917 1544 1215 7738 7745 21996 8896 7504 39075 11982 26163 670 11942 30381 44951 31929 111 29 191 27473
572 39351 33455 23562 33706 39546 45188 26366 6243 11134 24659 10358 39599 19176 33707 29952 11153 35362 33711 36283 5964 45264 48447 42526 721 6506 29 111 7500
573 26839 5309 52744 26758 24101 37302 46633
574 12334 8319 12167 11316 10146 7148 12418 12619 4884 503 27090 5960 658 8739 615 9346 27027 35639 8071 7874 5344 8101
575 10384 1281 49014 34682 31350 36646 51825 6246 9680 40782 29934 673 34552 9765 23940 3 36083 44593 16629 25206 51651 27068 77573 24717 48604 34591 31276 8408 23118 8270 45903 51659 33720 75227 32381 7971 47741 10344 7358 54456 40277 37427 5081 5976 28963 32407 29408 6174 374 34287 1704 22986 6365 1063 8935 215 7229 1402 6506 11873 37550 1746 23006 29036 1084 7499 7644 7850 27583 24449 1804 8509 10170 22237 28430 1890 24209 48553 1106 24260 8504 5945 8354 570 1889
576 8890 2605 1688 1438 59449 666 22398 49693 1065 8846 647 25466
577 7098 22502 45432 37346 36286 40169 62980 47773 9453 21894
578 6881 12929 14660 14306 53442 12373 33793 58383
579 67023 25979 50747 46447 3794 63083 12497 26746 31913 10941 32293 12206 33161
580 43989 41236 8659 3106 45488 47060
581 21476 29601 5669 37077 5699 8881 27022 7733 5652 24143 24686 7185 12405 43103 32019 6405 26683 7480 1614 1458 8877 41452 5950 1366 1725 1658 1452
582 36283 11845 40113 40115 40022 39833 39951 56015 29183 36890 25516 57281 54904 44490 35090 35058 51462 40273 46564 62409 40109 59357 36882 37562 37434 11859 42486 73190 40213 29741 53300 47140 82945 7966 83335 33505 71804 33485 52923 33504 43803 82156 85505 35570 87339 35066 91384 36771 35575 85618 38 48 27170 12253 721 1352 12276 30440 29016 278 1069 679 1435 81 29394
583 4797 1550 8354 25043 31324 21471 31325 8850 13066
584 33385 46752 374 33322 8069
585 34976 22221 9312 2688 34147 7518 32821 673 1483 1457 603 6105 30317 24731 1480 28314 632 23789 11636 1633 6104 27084 36826 5756 1698 1133 29618 36328 23745 23744 11307 7502 44677 1087 1455 978 27774 1662 1438 1465 11942 11941 11943 5654 12482 5261 1456 1410 5934 32777 28448 5703 33005 24420 1454 1706 7487 1452 11639 24354 8290 7472 42753 1230 11667 27162 42434 26731
586 12119 149 21760 12488 11272 11263 11265 183 7818 7793 12402 11220 11282 12154
587 5469 5341 26058 38118 6922 31120 4211 6797 8279 6580 6579 6581 6577 31946 33910 410 25407 1541 6921 23710 1432 1574 12202 9044 91 6793 11305 11665 34155 957 24002 6501 954 31605 30562 24807 10867 30189 644 1555 7992 1563 27662
588 34922 43221 34320 10953
589 9317 21890 7415 5568 1777 6827 123 7833 967 23024 104 25217 3 24721 23714
590 8325 1389 417 22956 6525 11701 34838 27773 7153 1387 24495 673 1370 7492 647 7289 28597 8320 415 1849 55916 26753 23644 1502 1682 7504 6346 36116 21666 11890 7978 6302 24356 16514 11887 7292 7220 395 7973 5979 10861 52789 28655 28356 28656 8875 24505 24400 47698
591 9583 29676 6949 9066 191 4936 26021 29744
592 33802 38592 9045 9056 47498 9067 3566 9051 29676 395 34203
593 12423 12430 34149 134 6365 21696 32591 24259 47923 31344 24186 47605 11936 31579 16562 32884 24280 28390 8249 32585 43380 5964 6808 6809 12120 1379 5602 28215 8602 24232
594 24290 29801 24279 56394 8248 12770 23909 32586
595 12868 13742 33326 33727 33728
596 11207 21565 67724 73858 39810 76414 18210 20291 29184 20538 60010 77786 87917
597 10826 42922 10824 23735 9495 7821
598 23694 24811 5616 29363 27090 438 52
599 27331 43558 7108 21543 21061 35722 23104 20847 11150 51100 88780 8193 38254
600 32030 34709 5326 32033 4727 32373 5830 6492 5309 9148 42403 9329 26807 25007 12463 24675 9316 37584 23074 5268 30670
601 42706 5267 23947 11693 32859
602 7819 23828 7827 10985 26526 7793 10975
603 26298 11222 149 7510 11295
604 15638 7723 25409 24682 20448 24675 4781 11947 36137 29668 28520 8380 11886 16937 72 1446 5731 21606 36758 26661 145 23743 32859 6823 12657 12658 8867 21613 36379 6526 21634 21672 21349 29830 8339 30314 23659 2762 8360 4808 5620 6595 17372 11911 21619 8328 29827 8358 20788 8320 21640 8325 2033 17928
605 8826 1951 5681 38569 26589 22962 1201 29095
606 35603 8801 12581 41572 33012 7153
607 22074 621 34403 24892 6868 24825 632 31963 12764 41587 33058 24887 26816 41532 417 11910 33160 28823 26593 43338 10707 8759 32969 8776 24816 43085 24822 24817 5473 30503 551 38204 25032 5329 24818 5444 6543 9188 37691 27027 24812 1435 1355 37686 1006 37693 24908 37694 34154 32783
608 31452 40602 27234 29309 26985 27197
609 659 6796 4831 651 33139 8027 10924 21657 35204 30832 7225 13085 5941 29978 23074 11873 6549 10495 1459 8837 6506 31061 31650 383 31233 12485 367 4337
610 6610 6544 10952 24149 31553
611 33292 35215 5116 23838 61063 45586 30812
612 10409 114 934 31945 33854 8866
613 35564 6634 63826 23058 23640 48420 42665 1459 7216 1653 24894 41340 24859 22995 606
614 1459 1356 1456 1394 28231 5409 33750 1674 664 1364
615 27445 5597 22315 28275 120 118 7228 35199 6827
616 1743 26923 23049 11879 7850 21934 56394 23984
617 85644 70248 30225 71608 44208 43051 70555 65339 7476 42659 77069
618 6539 177 6922 12461 36758 694 11678 7407 118
619 5767 31229 406 35512 25032 33003 36110 28273 23694 8338 12491 22953 21633 5977 21501 6297 4787 13093 8339 41203 36514 23028 24146 6013 12423 6275 37692 10495 36112 1564 22078 8318 28370 28534 8012
620 25287 77 6505 45926 29236 33650 10877 10878 43199 34622 9495 10885 42924 29233 29261 9508
621 31156 8269 70540 28339 27802 6310
622 12206 32902 6906 6966 7628 27663 27664 12168 11928 6968 25352 37565 12320 32904 195
623 5495 26688 42254 31717 40177 42718 37369 12045 7239 36612 23699 27878 34146 8292 3045 36355 24147 33123 31239 38358 1432 25311
624 33983 105 38072 984 23013 29002 10689 12277
625 28664 10942 1432 5988 26716 43 38 10262 5725 12017 34402 395 10759 26747 28951 25355 8428 6533 8441 8029 23696 1090 8292 7161 5643 5466 10689 6076 32232 30821 11873 23693 6912 551 7240 12121 1195 7833 29813 1055 25311 103
626 12121 26789 5546 2374 5924 39062
627 10992 30563 25646 47119 25660 14105 25661 11287 25616 54365 25677 38885 25673 262 10978 102 7827 7826
628 8843 21649 8049 24830 4827 644 8040 6603
629 25029 37442 8003 24815 6618 29755 5467 5406
630 10750 9318 8466 10840 23872 1046
631 41601 23204 24555 10863 23183 6767 24418 34619 1928 3043 27099 5679
632 7891 34410 24205 75 44 105 694
633 52732 7480 703 27503 34819 23129
634 62557 894 66471 57867 30980
635 7287 8774 1802 21610 666 8391 12578 7367 24260 33940 5654 33749 1663 23731 23775 1618 5247 1797 9317
636 45504 483 8641 29233 46956 7534 9074
637 34117 8363 26759 9399 2229 6061 30064 23292 5552 22126 11384 5319
638 12029 6827 68 119 1870 7476
639 2872 8458 37101 1897 38544 5308 45219 41474 10751 29529
640 34289 35088 45131 27995 43201
641 36109 420 7696 7691 34307 54846 27930 27929 7567 9049 9512 10883 9502 38428 7527 25270 27362 75 9504 25268 28017 25266 33618 29 46577 43996 9517 9519 34296 27639 25286 41543 687 10427 36141 25290 7562
642 6532 21805 74 659 88 26697 160 41274 104 388 38258 9148 25164 28542 26722 32896 23361 8250 23023 11208 23186 24346
643 29599 58707 46938 27598 23077 3425 38540 8381 29604 7782 21705 1744 37680 38538 9943 25344 6888 30492 1752 36602 17258 32702 21997 69095 37750 51406 3670 240 17602 2749 38535 1475 27652 1667 23885 4445 496 35697 1381 27445 16533 1770 38546 6879 37569 17858 25392 16526 11631 37570 38552 37973 17919 17940 44675 10629 38537 36788 3855 8203 48337 504 6030 23764 527 32023 28159 12799 17571 44618 10613 18317 18280 8865 2365 18407 22189 22228 18692 7711 670 215 10947 22060 669 18 26285 49 55 10948 36853 23069 43798 8096 10875 29403 48 10950 1384 436 1688 7224 429 1746 26214 23074 22025 11 132 28934 7202 25192 42460 22058 24156 12303 0 27800 7409 10262 24173 194 35596 418 7 694 22050 24150 129 11655 25 34220 6914 26 12028 1293 10952 6506 7832 32483 22059 22026 7540 5438 24829 537 969 21973 149 7546 12268 12484 8089 5 30 7833 42757 12312 52 7810 25187 687 440 23 10932 12 111 659
644 2877 7523 62804 9055 6979
645 136 23590 21982 29595 22022 40116 5780 2936 29183 61524 27068 40154 76770 10150
646 47071 31211 45322 36552 1970 24632 32114 42162 45218 36980 39418 38326 42478 48743 40203 40019
647 36018 24616 4218 41650 31362 57972 53504 73495 39990 46889 79950 61187 40228 43531
648 5326 23406 7774 5599 1029 29388 8766 26592 26786 640 114 388 7250 40432 1496 7139 8749 5237 5287 23233 10 8532 619 976 22990 699 7228 12387 11296 5725 704
649 27942 34893 25529 374 9494 8626 191 5434 41776 49 29237
650 33851 8054 1428 27130 21741 696
651 2244 9988 25176 35094 34445 31013 23954
652 13269 11202 24273 12459 105 32436 40994 23651
653 34786 42993 34785 729 5838 35138
654 24484 32782 34784 5684 1065
655 45634 10723 10401 39673 77926 53359 62543 52683 38330 90557 10849
656 29277 29295 418 8278 26879 34281 26082 36113 5370 11620 1806 26720 105 1924 24212 7190 7856 25187 7746 28577 32940 43668 29829
657 41589 29847 1382 28464 1688 5337 7234 8377 8437 31954 5390 21636 23795 1465
658 673 13093 30830 8526 8101
659 11960 5326 9309 10927 8766 1402
660 38846 22107 1302 42156 11403 33025 26578 27075 12535 32940 12425 1415 12642 10836 1508 10434 10835 26287
661 88367 114 7728 23989 22984 25041 6916 7745
662 23194 5951 5291 8910 13 12544 12944
663 16436 25924 30403 3558 30325 10098 38175 11259 12736 10360 26844 58036 39411 39855
664 41721 47103 72202 3734 38214 51827 935 32665 33428 39332 7912 55459 22250 52584 12281 56311 57977 11208 35856 74679 26719 1355 25389 24234 12490 29638 12410 40358
665 5405 7803 5579 10985 111
666 56285 66361 54725 2293 34064
667 10591 27432 8270 29944 11154 36283 33466 39879 21600 59840 10662 29955 40055 48604 84632 29958 7919 35563 51290 40234 40133 46564 29960 71102 84071 45121 58328 54458 29968 75708 89815 91390 57594 74680 85278 90621 63335 33510
668 12712 19626 26948 1238 7090 6190 38975 21056 546 13151 10095 34427 27063 27073 35566 24800 42717 89260 11954 671 7148 36827
669 8270 13047 1354 652 29891 28830 527 31219 1004 1486 11356 28936 11652 603 656 621 12026
670 11229 7819 7811 14086 9627 30563 14099 25594 11234 11000 25627 13578 34152
671 975 104 27642 73 1870
672 25156 11181 39849 11191 40240 7948 55401 59351 53017 57976 84744 89815 7963 63335 7974 90516 25420 120 25400 12210 388 27564 5277 974 43 41464 7502 33813 14 8403 31310 26297 7415 27484 25297 42498 31613
673 6492 9317 1468 23876 27529 42658 35666 7200 47012 8284 23080 34110
674 27770 33752 5021 4740 10426 6874 1112 376 21839 5659 7293 24364
675 6756 7698 33134 40674 42133 29821 24236 5656 45819 42134 12433 33135 33136 5579 7867 12208 38998 43647
676 527 1539 974 28273
677 23002 1427 41994 5686 3 1496 22997 12323 1499 721 40424 29667 38359 8491 33042 22379 32793 714 10937 42657 7500 47 7980 29 22027 26697 28576 41456 8284 27531 149 12330 5472 23047 7240 33134 1544 10181 26 24171 34250 21803 29269 41 46 7034 21804 10840 38204 5568 33136 1428 27641 4550 237 12306 1916 7721 7 28059
678 81631 25007 29444 956 36729 6958 7779 1767
679 41778 27988 32438 42458 28189 47108 31079 43989 27364 29672 27365 25528 687 29236 40697 34622 21815 8249
680 80377 26971 38443 38833 5272 23850 24093 5274 22095
681 39916 61900 39969 40150 36319 35059 40125 40251 40192 39842 40281 35063 11187 40223 61182 62301 68550 57156 35062 49912 35567 39804 85160 75978 91582 47747 28214 6991
682 438 11920 7789 11921 29385 31611
683 6601 6671 6513 2080 6687 2088 28447 21944 978 5281
684 58395 34362 33798 7620 7606 26260 53710 20616 56565 37926 20163 39427 80689 41226 49917 29162 39884 42221 61899 38528 57968 48340
685 85 10927 22984 5277 5654 662
686 26719 6627 7913 437 11891 8427 33956 5950 12747
687 14156 27358 34836 13956 5463 24416 12184 3297 8049 8776 6040 1582 8775 2773 644 1017 7300 8115 8130 9745 4557 12508 5014 6899 8051 2374 31640 23315 41289 38426 22059 1010 11305 22049 8539 43785
688 6380 623 7333 25000 1478 8459 37584 43082 10843
689 25066 387 4938 8917 8141 12886 13543 12929 36345 7985 118
690 10648 22112 10667 1140 23339 6651 2826 22238 5052 2832 15479 15513 54848 15111 15679 9859 14221 5111 14313 42665 2837 12934 6830 37575 15750 8147 25086 9444 15823 5070 5088 11982 5463 15785 15999 33405 23341 15749 28508 10645 8558 34984 644 2853 5064 31617 5102 3072 12335 621 956 10826 1554
691 5950 5951 5953 35391 609 612 5607 1634 24611 8444 2428 38963 7240 37650 5471 1402 1424 5203 38453 7139 5964
692 22536 51257 51302 11150 42478 46889 32940
693 28555 37367 38229 33505 7984 958 962 5491 38 28972 721 25219 10806 389 5405 76 7866 6606
694 1310 46750 10113 10621 10066 24647 1307 57192 10119 33201 10087 46540 50777 88565 33636 63483 59231 32565 42060 27072 51660 80054 67330 60295 54232 10140 663 26725 55007 7787 34634 36323 10707 6446 27027 1435 1055
695 52410 69853 85875 89401 1506 26886 29673 10882
696 656 38041 551 26816 5173 22241 26815 4561 12759 12686 8013 2322 1684
697 14274 14956 9552 14903 14865 14823 14942 14180 14866 14752 14914 47232 15024 14659 14880 14916 15046 14520 15065 14896 14891 9829 15107 14377 15149 15234 15130 15079 331 15078 30395 15248 12189 15244 15214 15284 15212 15114 27942 15318 15276 13898 15285 15156 15373 15317 14977 9141 48348 15427 15381 15438 11042 15437 15449 15501 15502 15296 15424 15505 15498 15530 41240 15570 15516 15519 15470 15412 15586 15601 15451 15297 9870 9426 15708 34797 28020 15738 15780 15729 15784 2893 22970 15532 15806 7582 16392 16691 16833 12603 31090 16167 16893 41745 17112 48738 16895 3302 16988 17074 37700 16534 16298 17167 16235 3068 16404 16958 17169 17133 9894 3634 17030 17305 17156 17234 17146 17214 17377 11047 17279 16405 17072 8085 17320 17376 17466 17400 17468 9939 25268 34079
698 83359 1631 26731 7770 180
699 42416 12914 38773 33433 35570 24346 36326
700 34129 20104 38812 45194 20207 39272 12725 7090 33281 13003 20093 41359 20418 6171 20324 20326 26958 13015 20308 20358 34586 22269 25119 33287 20465 13009 20415 20494 20563 33686 20566 20556 52006 20580 32797 11122 29919 34130 51917 20721 42978 30928 545 30613 20740 13018 20718 21535 20871 20957 12734 8241 44579 6604 4772 20709 32108 29492 21092 23564 37396 29921 21158 7107 21041 20636 21274 33701 10609 23936 29924 30937 39297 41301 12842 28559 52039 22298 6223 54854 30716 34545 42573 32511 22295 42576 22306 35315 13052 53526 50221 22305 22308 13042 30959 7891 28994 13044 52601 39419 23597 23620 42554 12839 29932 23609 12914 29933 40830 81906 62630 39525 12848 34195 31569 54868 39740 33719 11149 27432 29944 48420 33713 34019 30211 7924 38454 30265 39883 76767 37228 29950 37416 35185 33793 47168 36641 80613 30219 42705 38393 40496 29966 53978 35566 36643 43773 40263 46553 45912 49660 7966 56507 10928 42022 31962 55005 89270 5374 1796 25191 7981 8257 38258 34830 23651 34824 22027 12475 9043 25293 8399 31637 12863 25187 7189 12433 27090 34249 29821 5751 12281 105 23051 517 1592 5435 5984 5372 615 278 5590 10840 670 27091 5579 687 9306 1069 8785 25324 38542 1900 1868 27189 5467 5406 5450 22963 8377 208 1565
701 4243 20346 13004 22270 10576 30918 13023 8221 34589 10246 23096 13030 6890 20515 19515 12367 21164 34732 36981 12990 10377 13037 32736 22308 58331 28629 24418 39042 33703 7964 7410 1603 5580 31637 5370 1555 9070 12333 137 32436 9071 1014 1871 10831 10842 6697 10867 566 191 8755 4936 6603 6623
702 40288 26647 6292 8710 668 37016 5604 8622 23233 166 24872 10826 1362 23057 23964 29622 25053 8027 21470 8619 27661 28924 8428 53237 23650 124 186 25217 39 22050 42805 30661 12329 8323 7406 41 8598 6764 21845 291 10751 13718
703 7156 24377 21812 8729 5044 12500 21814 11974 7228 8853 29269 1670 6828 38221 139 34112 74
704 1034 3 1664 640 46773 12187 8428 29975 671 34249 12320 5111 29386 32483 143 7482 46593 8766 397 34328 28128 10935 7042
705 7014 7033 45424 26185 38575 30632 24442
706 15742 25274 14165 7568 27927
707 28586 23883 24871 148
708 6129 25129 34442 25426 31539 31517
709 951 3468 47846 51779 7461 53415 12259
710 8549 7156 23946 11336 41500 41029
711 42099 4815 37113 32332 33772 36131 4650 1292 41296 27053 43136 35988 13004 30797 53183 43927 57993 41695 61227 42716 38824 32565 49150 55392 83958 7787 1230 1091 27034 27449 12625
712 1438 29281 11204 36723 1120 14 1332 1366
713 37651 373 8323 29982 24090 5378 1680 12862 10826 6576 13 30832 427 26714 23074 6927 5459 38030 2045 34437 5445 24805 7430
714 28418 28422 28423 32938 32939 27780 957
715 58379 60813 22622 73511 76416
716 29126 32000 22507 50483 11129 42990 45296 34393 28207
717 6437 25280 24965 30399 25264 27834 9048 6426 11291 11290 6427 6439 11292 66157 25260
718 23305 9056 1603 5580 7803 5370 7874 5821
719 5784 1199 6897 12970 19080 145 5056 9412 30710 38018 1913 54366 40649 16423 7984 39074 44 42545 12308
720 439 38311 432 5707 26700 10468 2923 24770 1673 28853
721 2765 12571 8542 22192 7761 679 12858
722 8826 10410 33331 10698 7246 28276 7489
723 6538 8854 8846 8368 23770 7289 41419 8732 6682 21659 1459 8721
724 29374 23798 21959 2017 42127 33908 7637 1707 25395 91 31948 6599 31332 32893 23817 5044
725 2174 1252 33574 12794 41555
726 21607 5326 6492 29887 24204 41435 27771 5279 25051 53368 40698 5271 11360 5277 21605 8836 21622 32912 44506 33295 5281
727 11784 48361 32261 33822 46736
728 10709 5937 33751 7731 1782 5837 5838 5840 8376 8361 8378 7504 33262 25128 25133 3819 1924 11701 11704 9572
729 19184 40693 46826 19056 29473 1866 22250 9471 19078 12354 19532 19258 54103 10651 46265 22010 30903 26856 10303 19381 30910 21532 28550 9475 22252 29484 5650 30031 52701 57122 49117 12717 19879 34806 19960 20070 30303 30920 10327 20015 12741 11532 13015 10576 12826 20298 12359 19818 58914 10587 20451 29868 20608 51156 20337 23554 6190 33287 29486 22269 10335 20454 12368 42978 26062 8332 33946 27883 21894 25215 22048 10867 22994 28290 1549 25217 6666 6590 28960 24778 35894 7995 35461 30265 30472 1063 76 5588 8739 31650 31000 30535 23027 6730 21633 5642 5415 1603 7833 9979 5378 29 5370 278 21482 6076 4776 1269 8277
730 27722 40422 11289 10985 33783
731 13060 31412 1532 13093 12348 21501 33055 36290 7430 36514 31333 1558 28370 604 8248 13066
732 5608 10824 34622 29671 10831 8249 6947 4894
733 32533 76173 74075 25517 44390 35413 85298 40026 26290 74676 77691 62065 40124 91355 77875 35450 74551 57877 76774 48983 62217 28788 57876 79611 68645 84779 33484 40234 49912 88280 88490 90791 91103 88080 13075 7125 76393 40262 88600 86738
734 61534 51846 19485 82021 37715 90984
735 409 23804 34155 7803 27162
736 2426 684 6915 89 24068
737 47 10937 75 46 1363 38 10814 24205 29654 12745 181 316 6506 714 35998 38255 6681 12330 44 21988 5601 31571 29742 9979 5472 7406 29 33812 21892 12387 23406 30174 383 34381 24171 1069 119 677 10940 195 1870 29775 971 409 77 6914 5568 12485 8466 6860 25343 25220 6507 40433 8323 6603 33111
738 6176 9056 26162 9057 12208 23828 7812 7798 29416
739 36242 12312 32778 8096 7832 23270 537 30 12 429
740 12837 2713 9362 43452 28511 56554 54183 50641 1053 33710 63327 42914 91262 34142 35215 4778 6358 9310 23884 7289 2688 41029 35709 28597 23829 28468 5932 58077 4782 33950 25032
741 26708 11928 31130 40716 6613 6611 23409 33727 7504 24813 38062 6329 24770 464 10444 10441 7437 1376 1369 28449 1377 23149 23153 405 396 24762 5416 26241 24368 21959 29986 24772 1537 6921 1541 3085 34787 1574 12402 26058 6649 28290 5616 6292 28294 6647 38036 7491 1550 34179 8071 23021 6793 5198 24142 6797 5341 1590 38316 31120 8724 25060 34442 22981 401 5182 23814 5357 702 34830 703 5344 29880 5618 6692 6623 6603 5615 23143 31117 33728 23210 23212
742 6636 23829 29535 2151 12349 9361 6710 38052 10697 31040 8013
743 45201 64171 37232 72993 31175 53497 53498 83943 47871 88898 50471 67473 21567 46847 82566 77671 76158 76154 91289 1537 45353 32492 6645 27917 5615 31328 6660 33055 6928 6692 8071 33056
744 17 5805 5643 211 29 427 47
745 2379 28677 45365 48712 9753 13554 22149 23006 27027 26770 1090
746 41135 44654 1446 28122 5445
747 12764 38789 28928 36230 6984
748 15554 3630 1205 16348 6572 30359 32023 17302 5783 3468 28311 34651 18502 17136 3561 11793 14985 6196 31476 11798 27577 37971 12795 5812 17384 5791 23767 17387 3906 50684 13122 35478 46960 31675 6144 325 18385 10047 31266 44629 10867 6921 11200 24811 28289 11744 29637 26588 42757 47175 5579 5821 7224 5652
749 25184 120 76 24778 46393 32746 89 29637 7980 5440 38110 22315 12423 28418 5413 1603 5370 21481 5415 6676 12333 45123 21482 33040 29573 5821 5414 8020 566 5437 8785 5378 29694 4936 5411 4981 25324 37442 5433 5442 28591
750 6204 54251 1551 34146 10755
751 5676 28132 33909 7227 35579 23817 6695
752 1798 5643 395 6533 2923 4902 21944 447 6319 7289 5445 1383 28216
753 1539 673 2178 1776 22091 25417 33743 31412 29303 24846 23030
754 22032 24119 12484 7504 26793 32885 1773 683 24785 1499 27117 45913 12861 27445 43806 45902 114 26798 31286 28857 1379 26576 6929 24137 21831 31287 24505 21643 9404
755 6247 22533 39381 36265 44989 35309 24668 37403 37346 6263 10701 11377 42523 673 47637 7959 39086 73974
756 10980 34092 11275 10848 10983 11267 10985 12124 25544 10986 106 7797 8074
757 9444 30523 5578 6940 5777 16674 8203 15974 18049 8027 5471 31583 10826 6660 395 28290 12862 28578 22965 6692 5406
758 4665 1003 5114 1434 5937 6830 27445 11441 8584 11431 3823 11480 5257 12992 4746 5682 1252 3687 44588 41620 27056 29361 12044 26300 6906 8848
759 4747 10095 35669 29637 5821
760 11370 11386 2317 5316 30408 34979
761 58709 39846 60258 39232 5607
762 4489 16623 37769 13554 47094 38883 43314 4326 59354 40715 1561 44707 12111 27583 36494
763 42357 7222 7731 2114 41865 23549 70071 75553 1074 42060 42226 6237 27693 5225 7950 10388 33670 23631 3387 34888 27034 3305
764 5521 24208 5530 10703 12030 662 7139 8322
765 1809 38985 11302 31785 36351 26811 26641 26766 35941 7334 26477 64756 6823
766 42232 71162 23128 6793 30267 5606 5341 5654 23080 30505 1010 6612 5929 8338 12761 1500 24209 23750 1 12403 28230 7227 621 6473 28252 5472 28928 385 1074 7021 24364 30500 104 10829 6904 13059 27906 42985 12755 30562 7512 8730 6289 12346 39004 34438 5448 8729 10867 7721 33738 563 1435 1549 696 700 5405 23267
767 38 1383 23701 7726 43870 10942 36242 29742 5466 23674 14155
768 27835 183 30401 34092 10985 35924
769 5607 6910 1563 3085 8766
770 58 8885 694 28358 6914 10814 34283 10440 7207 32839 0 8866 34287 7697 22045
771 25699 25750 25743 25752 25715 2550 11252 25853 25910 25995 25911 23412 1829 25871 50980 25913 10005 16706 47711 25938
772 53179 6478 6267 90267 26058 23143 374 12345
773 7227 5597 32784 21886 12374 1432 1355 1025
774 12488 10976 183 27723 7810 11213 33784 12129 21760 7793 29403 46157 7825
775 8675 118 8831 11881 26473 8863 7046 1916 8261 22990 24890
776 1452 380 6273 7331 29522 31943 14505 437 25047 4775 1389 13097
777 50293 22483 40993 6845 11858 35565 45861 42367 7042 40259 670 28225 2730 22097 1746 7499 12479 5599 35994 8399 10160 7832 56 395 10165 29810 7770 49 7212 10950 33849 1084 6359 1013 673 22040 105 551
778 8295 32225 45177 23031 1676 35622 26189 1647 1402 40952 1919 12578 5644
779 41464 68 155 971 100 977 28215 1688 33904 5770 8249 134 23909 66
780 43399 37086 21591 28810 29953 53714 21457 33453 50347 39649 32384 11846 28819 44323 28045 11174 39622 921 69724 40993 39966 52283 33465 39883 39985 51297 37061 82485 57690 39995 40146 10903 29184 56517 75630 60726 57876 10913 40255 49625 59354 60713 76285 84744 43626 80006 67716 54462 57160 91123 86732 90668 88482 42531 36895 91594 9508
781 31708 31165 13046 17546 12850 23625 30954 12370 33433 20306 11851 39779 39775 30200 44074 39765 39596 39773 30207 7716 20348 12372 39872 9484 20299 39962 36446 69878 13356 30211 33495 50617 23643 32227 23640 40122 74951 48094 19533 32527 19767 19426 8409 28880 36034 63585 59765 68944 33467 36874 29964 43773 9478 40214 63826 35564 52156 54649 74676 20920 4948 21261 19430 30218 7015 8188 13542 13940 15325 2580 8823 77325 17073 23608 18156 22402 47161 39391 39963 67460 76807 42226 19718 33479 48531 11868 63639 30232 81717 20937 75618 40462 44472 31695 32689 90108 67328 56998 32516 31711 30248 69313 83826 24799 91285 52073 52549 90517 90711 84421 60320 60316 48475 66483 10826 5471 5404 8755 12334 6877 91 5374 8051 33191 8322 7988 26059 29507 27917 7227 8739 374 6533 22969 8027 6597 954 696 5378 12862 26115 24778 700 5729 33058 38398 1603 5370 5413 1532 5642 31329 427 31637 615 27815 35639 10832 25293 5369 1435 10409 1871 41175 432 22965 598 24805 8040 5411 6676 5442 4981 8354
782 35139 23049 8071 5614 10145 24366
783 26181 8491 17 23023 5966 42411 26738 38547 26652 1402 1311 10689 1425 10504 10495 1454 28473 10807 21623 1561 36206 1432 9979 12312 7250 14 1698 26767 418 7210 31099 22122 10806 1046 1094 30440 381 38258 10170 41287 6506 8013 8 22071 105 11286
784 21534 7964 91575 85501 29968 655
785 7409 7827 10982 23828 10747 12119 12126 149 10976 10811 10974 12130 11220 10985 25543 7799
786 6506 1363 10 29662 664 38271 24345
787 23783 6328 24279 11667 27824 29833 8426 23036 41586 6406 23782 8364 28091 5985
788 18578 12371 28880 29217 33466
789 7512 66 5684 7770 1400 41338 26802 32784 56 23307 13067 5597 6827 7514 23354 28274 12329 36398 6506 133 36565
790 47643 44322 60888 36738 23521 31324 23698 438
791 10444 5370 8822 24828 5669 379 43338 1890
792 35394 1872 5445 26588 10938 77 7995 25297 679 687
793 14553 8476 33002 24518 32480
794 65724 52144 32166 65720 59835 45039 42685 2177 45046 37851 27836 270 6437 34092 149
795 6302 21476 2287 24110 1042 120 967 23031 7228 22995 5941 5101 28668 28537 1046 26765
796 32425 27117 27094 2525
797 9054 8641 31955 31312 31093 10877 5434 25241 9074
798 12215 30037 7144 1918 7147 35632 45618
799 5682 26755 1720 1802 6460 8863 34374 160 26714 26564 6404 26300 34096 24734 1663 5964 24736 1103 13065 6492 52889 26485 23745 1622 28881 8853 11304 28050 379
800 7139 28450 5653 43348 10866 29323
801 21917 9854 3092 12109 18934 42715 15808 90 66389 3231 12424 30461 60 27491
802 11660 7294 725 9351 7282 5370 2278 22108 6051 6459 5012 444
803 29852 12502 32073 12121 28436 23954 34705 23644 32958 5680 27866
804 7818 11289 7817 11270 10866 11265 11273
805 8490 1430 5560 24260 9432 26098 22197 7340 16377 35509 23187 10826 11744 11332 28827
806 13059 7337 7328 35518 4509 12028 40371 36728 671 43808 1647 33040 120 29521 34707
807 41660 26628 44118 22293 39555 34773 38454 42419 33459 39475 45296 41556 22771 40163 40176 53676 42259 40249 59387 1497 36629 42411 10774 2458 26189 39105 33907 9979 32175 10772 2749 30767 1970 10835 37499 35690 27356 670
808 52 687 10826 7486 24150
809 5438 8869 37571 1676 35638 24216 22313
810 24283 17552 6879 12473 23085 22003 50220 20686 22008 20579 48421 67440 59838 39145 181 27470 21838 26219 27647
811 15312 5837 6812 8929 16373
812 29986 5218 36134 29382 28140 14499 25413 26510 26585 32916 12855 28312 35460
813 9151 29693 1334 33201 36430 5444 11305 27782 5197
814 36869 21626 1664 44652 33949 5971
815 42153 22032 5643 25203 24401 7980
816 11191 447 7746 39248 33551 26839 1074 6396 23600 29285 25439 12071 25472 35623
817 53430 26980 54196 2807
818 50794 3677 24584 30137 11139 41661 39794 60870 59922 43402 7917 11842 57283 22872 33080
819 159 10940 29755 25343 4886
820 36817 10708 1007 656 8447 42721 5357 7778 35110
821 8333 35592 6363 8324 31940
822 5326 10698 31290 26751 6030 1355
823 957 8354 1563 373 4892
824 9336 57090 34208 34177
825 44967 42788 10373 70560 41184 42443 10370 36528 24655 34597 44664 34596 42790 937 11132 39387 33428 47530 53416 44672 34595 10386 35168 42187 35170 26873 32051 10660 33445 39541 7916 39674 39627 24198 36700 39762 39850 32387 56305 29192 39998 38780 7927 7921 7936 11189 54249 57979 57981 68697 33605 24141 32608 5929 2721
826 394 3564 29370 33904 24412 11
827 21932 35140 1798 6524 4807 9839 24767 33852 395 5815 21933 6371 33860 57069
828 395 28132 5438 114 5725 21906 1563 1592 28136 409 6927 31614 1555 27740 5599 6533 27689 6921
829 42695 15834 23002 35101 6802 28150 29282 7737 31239 26190
830 5151 7331 1293 8253 1671 2923 6404 27152 7423 4887
831 31960 72 34229 7522 40912 29257 8663 6429 29688 41825 3566 28813 21769 29692 25282 33841 21793 34079
832 25404 50757 7979 8322 1541 6905
833 6429 29688 1616 34224 30318 9061 24771 65 6617 1921 1868
834 13461 8082 39237 15172 33911 8884 28693 24758 46026 33868
835 32345 43077 2491 26961 4718 11355 5540 23580 1352 4088 8584 38210 49077 26458 39707 88945 11612 38822 32064 32067 10701 40172 47838 12154 26819 46777 41526 8801 650 2521 35701 32256 656 12489 23080 41429 24899 23842 33156 46776 7850 7752 1147 33621 551 36223 46251 24386 1106 5362
836 11400 31549 3333 28952 7293 2867 43128 37548 41386 7208 32275 33811
837 83646 66720 50795 48655 52858
838 32797 35977 23893 2204 31928
839 40844 30813 55635 22547 7469 56808 69093 53413 22591 12192 30484 61226 48810 10788 23626 22686 60774 11621 46555 33496 32773 41555 32752 63483 20847 12366 64378 52668 50293 38913 53474 7227 24768 36588 25428 28600 7289 10861 27136 27728 12761 27131 31413 37634 27211 24163 7740 31006 1539 28153 1550 21471
840 11928 32793 1224 2114 380 27748 6547
841 8560 4011 43962 32067 32391
842 85078 62231 76582 62060 83174 72011 76234 70891 66932
843 12900 33557 5445 5696 33152
844 38225 33430 27281 22099 24037 23017 22070 36398 28425 1042
845 26636 7148 1078 17 25144 104 6827 24151 34109 1059 46251 24208 10843 7855 9313 57069
846 1446 1459 5750 10146 24721 5436 423 337 251 1017 6525 1155 26754 11701 24354 35427 27035 10158 5840 658 5476 8724 1545
847 8848 1364 23041 1448 27110 11900 5190 12480 8381 27095
848 26648 426 32958 1809 24893 5044 643 31650 33951 36510 21494 37660 10952 38923 5428 5927
849 78317 74913 23696 6961 12467 6963 6956 35172 9091 27790 34914
850 34019 39863 39582 37563 29183 25519 26210 40114 12805 11178 40104 40263 27720 40065 40022 40039 40201 62217 11854 40033 40109 11859 40115 46564 34950 59357 19266 13047 29741 40240 57984 80240 59355 39875 8215 40213 53300 82945 40230 37476 82159 50665 82156 57981 71804 59384 10615 87462 35571 43803 194 1648 26734 49 1585 68 436 34217 42094 17 34070 7250 22995 10950 8428 5466 7202 537 7540 37647 48 4054 5684 27156 7 38386 10947 5643 8257 30357 23650 22379 0 606 12036 1384 104 973 12936 118 1200 25345 27170 1063 376 7405 7228 27660 22031 38 1363 30437 27105 30 551 41483 11683 14 679 37507 5963 75 687 1046 1069 1094 137 30359 31316 23 196 1916 367 1269 12 26 7212 24212 7408 34261 211
851 6267 143 48292 24894 6214 33596 19961 45582 37607 40432 33726 6328 28444 29540 1794 22030 698 33156 32995 13097 654 35597 25045 29665 23781 29516 38318
852 14015 36034 28322 5655 6333 6346 23698
853 67266 39781 61685 48626 42808 7087 66775 6856
854 27039 3284 26696 121 23497 26648 33163 5468 32480 12282 31130 36355 24708 25147 29846 30515 10117 42649 378 29056 45996 26699 11342 691 10007 31235 646 7487 6478 8409 29503 11532 48011 1339 10621 1 4508 32582 82396 10707 46612 5046 31241 31119 1443 44133 33980 2304 10692 1792 28298 24423 8434 25309
855 33281 33211 22607 50559 78638 28976 34258 7005 25352 7867 28922 7500 7855 86 6969 28974 29260 34290 34919 29821 61140 5579 7872 38036 25355
856 17180 376 1746 1291 23770 7201 1649 1636 4795 34270 22971 38 33793 12592 7972 7386 33557 8040
857 6657 5628 12299 6827 8072 4893
858 28427 23269 21845 66 27908 1589 23017 5652 27075 32584 5611 23697 696 12202
859 29389 6823 35626 31893 53368 28971 10861 11776 2923 11929 114 41590 33552 27156 22071 48361 41337 6806 32416 27017 373 24172 26636 27675 380 5455 27676 54246 374 655 10854
860 23025 32139 32793 24363 8377
861 24708 1029 5409 24960 30670 29002
862 1793 8377 13057 377 527 8258 8048 167
863 27981 27944 8656 392 29675 9068
864 29120 38245 33218 6191 31712 3992 20349 12819 3965 29850 12364 10033 13031 47070 30962 13009 32550 24666 11106 43310 10094 10086 42230 33450 36269 23622 39688 46774 28645 21135 10637 61246 39937 90997 59441 11871 6533 390 6549 149 615 29516 5643 663 24505 5375 6877 13059 8526 1006 12320 37667
865 18822 1539 1550 8267 1595 6884 21139 4863 4871 27164 28121 8253 32997 35222 33724 13060 27171 30999 437 25047 4775 33867
866 26066 958 30495 23732 6333 23013 8345 23689 7504
867 50896 32008 11856 10130 39931 39832 32836 50703 32071 54457 53505 31719 40213 77232 32396 45583 11865 35492
868 25884 28330 11266 7827 11213 25542
869 26734 5660 2594 42315 34163 974
870 20324 20005 10040 20087 20003 20346 20359 10328 23577 20244 20628 10331 25120 20580 22281 20887 28988 10593 12738 11113 32546 12361 32510 34195
871 35704 11267 22991 7823 11264 7819 11222 6433 41994 7409 394 34113 26696 1459 7800 7825 10974 6436 6442 10747 23828 7801 30576 40888 12127 52634 10811 693 12125 10840 10992 106 12120 10983 10975 11283 10986 8626 7797 7793 21905 7828 8074 27641
872 12435 6473 22973 26540 8592 35500 28922 6801 10867 5725 23013 29665 6906 6827 27742 8341 5405 6600 24236 24871 5376 22063 6984 1356 11872 7042 61412 12433 7644 6508 1492 551 25220 31930 28583 650 14529 1947 10687 7803 6446 8589 5445 5406 1962 5431 180
873 24858 28169 24006 5096 5618 23123 9404 7504 7501 13062 388 395 26647 33262 1798 673 25128 13097 25133 5964 1 1427 6524 4807 3819 5617 7485 33743 1614 379
874 61346 49138 79906 38720 52559 78435 49146 45488
875 48896 26347 1438 5036 27347 8993 7972 8026 862 10560 545 11204 12112 29530 91539 23802 22030
876 32063 34951 78953 65562 90357 28880 31594 23004 23153 23149 28286
877 27048 45191 30376 38519 12360 8801
878 35880 24626 35766 20715 12709 42185 12739 12726 32678 36394 42519 44321 25513 36525 42447 7716 41335 27421 38454 37424 29963 52680 46575 62981 86732 90516 42366 56419
879 6197 16501 6167 33960 15102 36034 35843 28504 31341 37696 5879 6251 19497 20906 4457 37717 4776 34527 3537 21182 19961 8425 4874 37732 23150 44719 31060 21045 6262 59809 45781 11868 45782 16302 42217 11862
880 892 72548 5904 35768 23096 42940 23097 12836 42445 26778 8951 21615 36551 24649 32107 42447 9003 36394 44321 44110 3960 37403 44592 7917 11737 57969 33300 32625 8261 32178 26715
881 14024 37690 37064 42702 44170
882 20671 44642 41005 39630 35449 42793 39390 64731 39424 35313 33459 76644 55962 51307 77558 43773 80709 41262 53978 43301 71205 28644 11868 36584 32405 91123 45879 67634 91539 382 5616 1743 29000 28290 5615 4906 24368 34442 42643 24629
883 28280 11200 79 12266 32292 23013 10
884 12764 25363 11887 10872 31504 31935 11545
885 5885 42751 3084 45519 19430 25114 61240 13004 38177 20210 20329 6774 6763 12716 20300 704 8088 9254 31271 9447 20298 46910 20487 25121 12358 10368 26111 9204 12508 20888 11812 32550 11809 21261 30306 12734 23579 33433 12360 29870 25115 3233 28645 41555 12849 404 30260 5725 6501 1554 3085 23707 12167 11279 6614 27745 27917 6603 91 6793 8070 6292 703 5357 5615 6623 382 987 12031 8322 27090 1871 5604
886 47849 72141 57130 54227 66051 23657
887 6905 7243 11873 5703 10495 374 700 4936 23072
888 8310 25037 4827 11966 35253 1608 21620 29346 10702 241 28183 21941 27260
889 29309 29310 33056 29509 24728
890 42166 21595 39231 7928 34677 34557 24010
891 20253 46071 20478 20465 17520 26116 15462 5752 30376 9481 12368 40347 21115 20937 21411 21164 30306 19575 35854 7110 10366 12364 28631 20508 33418 61987 11807 23597 50406 40034 12334 4211 23021 8322 38036 1544 28286 5598 5476 10143 10 4949 5357 26071 5599 4884 22982 5467 374 5481
892 29849 6554 8292 35891 35952 34452 32073 684 24147
893 36885 27072 40497 50668 38828
894 7738 40765 23630 1707 30745 5228 29428 1438 1441 38609
895 8745 9364 33933 16965 33330 635 24409 29230 1606 4838 1541 6657
896 8253 7504 6069 24260 114 7423
897 28938 14202 27657 21843 9023 24230 2208 12268 2264 74472 55540 24877 28874 52519 24316 26939 54442 2300 8532 85877 1293 62409 4795 10543 71337 49660 2725 23328 150 50 8751 153
898 64129 77413 81387 50823 33720 50475 87575 48799 7951 10920 50481 63468 87753 83735 70517 12156
899 39642 24668 39624 36810 11155 33260 40678 40280 70540 89262 44543 8334 40360 11952 28939 7761
900 6190 37602 87389 91120 3 34073 27551
901 55 8319 12500 12536 8047 10844 47 10071 29885 1006 38358 551 5445 5342
902 42786 38325 44362 34391 53504 22926 23444 33508 26756 32232 38801 32965
903 29323 8936 24160 44936 28073
904 7228 1486 1730 23072 967 1638 1432 1746 1673 22093 1633 647 5684 29829 1646 10924 26612 973 1041 12165 1063
905 7336 2484 31061 1005 30665 27068
906 11592 22290 39715 6267 24147 11662
907 8696 29167 20044 35090 40256 14 7994 7506 12272 37341 5796 5445 40
908 65552 84692 33871 36151 67046 53794 73005 68406
909 12371 35836 46810 44438 35211 6645 8330 28294 22998 7434 24823 28073
910 1626 7929 1791 26734 1004 8131 8836 1672 24891 1641 377
911 151 32592 47596 6914 42758
912 3353 5428 30034 10944 1211
913 4653 12360 3642 1029 26502 43072 26876 4763 42055 7457 6223 22749 53047 85346 17 646 8054 8532 12601 23997 7422 26809 26592 10783 8626 26588 24013 7473 27922 1713 46767 7224 29270 27912
914 114 13 29090 105 373 1870 5703 27479 23697 23 8249 195 17 33135
915 12275 1787 26649 37441 9336 10693
916 615 1063 25343 1006 4936 1069 739 6310 5696 24117 628
917 114 10703 22222 5614 7746 8322 5616 5476 4902 7410 5964 23818 40421 703 427 23013 380 7405
918 16964 26700 26705 41342 26703 1695 664 26640 36957 1273 41484 6481 26188 5438 983 24505 21927 1709 5201 24468 377 1712 43081 25218 1734 11637 24891 3038 38313 29143 1453 37501 23179 5199
919 1640 1180 23790 1457 1453 26734 1438 41589 11298 31774 8941 5741 1459 674 31499 1658 1096 1387 7331 12162 37550 42499 21476
920 29616 5182 48069 30785 2379 27162 78 105 151
921 24139 1675 24855 1655 31036 72 41541 1731 12266 23844 1981 30771 33751
922 1006 8526 5461 12027 10147 658
923 7410 31358 379 27782 1441 25043
924 14293 6742 1602 24749 7170 6763 12451 14177 5014 5605 14587 10241 4977 6766 5015 23270 10060 5712 13615 25072 6933 9533 8020 9426 4945 13302 26524 13619 9778 4976 24461 2407 14511 24942 2402 4907 6747 12917 14518 13422 22118 9433 36333 12351 14870 8150 14923 13445 15011 28601 12508 14828 25075 6079
925 7200 6906 6909 12471 23882
926 47638 61986 48562 23620 19952 22525 89298 72502 42355 24417 30258 54216 59851 8054
927 12765 30661 26815 43495 14 25060 7234
928 36337 28897 5489 6544 1486 8304 33168 33976 33131 29035 7422 26820 26481 186 13092 7243 5976 377 1383 6458 40761 29837 7350 417 42342 7775 22223 8404 28886 10691 14 7408 7333 24015 38982 24943 28889 34903 37302
929 7478 5682 435 22207 13550 10971
930 5259 6613 39252 3405 52664 60398 22766 22845
931 30713 7006 6956 7701 9071
932 31507 31509 31510 31539 31524 28162 31518
933 85873 75856 84342 90623 91286 91466 49910 31081 25299 6918
934 35454 35455 12913 28444 5780 24098 36340 46906
935 6919 32076 7087 673 35014 7471 17 25192
936 20690 42392 13024 3637 20494 35319 891 20867 20925 20884 15777 20932 20991 20992 908 56685 21063 21058 27274 65303 21023 20986 51468 20844 21071 21091 8240 5092 21171 21221 40692 30791 56693 21365 21397 17835 21386 55618 19662 21398 48863 49634 62143 33401 51216 20791 33046 68291 19592 47780 27354 21436 53522 23168 59980 42627 34523 58330 38188 45093 28768 44320 45442 73608 47967 61578 39429 11907 58074 62928 67551 54571 39591 63457 60266 44171 39756 82447 80256 71251 1951 25004
937 27757 12645 10362 30347 4589 9174 46425 43356 40925 38818 11744 1916 2164 13004 7378 41174 2103 33430 60184 36810 77232 90882 38948
938 0 5654 8877 7 12
939 44678 1490 8442 430 28278 24356 24345 58689 1410
940 32525 22614 33706 39740 39781 4528 39772 39883 25516 7940 3656 36312 39987 40101 46883 40025 40106 40263 40234 28206 43456 76724 51767 7964 40109 7966 35572 25268 29678 31085 354 43 31292 53 21805 278 22054 25343 102 28229 10951 7199
941 1780 1211 25052 8361 14076 8443 25404 23110 11296 37501 394 5111 14718 27243 24426 27211 27296 9733 16655 24947 29171 3684 30197 37730 6810 22085 21812 128 37696 4807 23703 527 11961 641 32592 40761 23743 1740 5165 36137 11
942 6170 34635 1051 23425 1140 6890 280 8574 10286 6474 23514 23816 6155 12994 30307 35298 6234 5942 694 52601 55909 23578 38229 35569 7228 22995 38386 1634 29281 7408 427 7842 1046 24876 8288 34279
943 25383 28573 10698 46310 51783 24139 36337 8338
944 21476 36856 7219 7211 23047 5445
945 36323 32079 11316 7139 27922 6554 5300 5327 27917 8526 27027 7868 35954 1435
946 29660 978 643 12967 40959 7867 12460 68406 27519 51790
947 29840 36362 38859 1610 36262 5641 7408 1782 1148 11636 11204 8922 6459 8886 23782 9309 1798 6524 4807 7504 8426 33987 11747 1704 1026 1382 23031
948 427 7803 729 5614 5615 5616
949 48705 39303 38561 10669 39369 52655 10372 55596 42520 39438 7894 2203 39720 46205 5371 28827 6585 10827 30015 8632 567 7505 26644 29507 5964 366 7144 32214 21640 8860 5588 155 33 1090 9028 4890 29269 76 52
950 14865 15742 16263 17705 6411 5434 9042
951 41776 9058 34224 38590 31082 9146 27978 29646 24992 25266 9162 31093 32130 7002 15533 25529 191 38228 45630 25290
952 31227 721 1379 93 28424 1096
953 27165 10470 26886 563 7644 21874 30461
954 23439 12425 7008 26923 44527
955 6590 33130 29667 42657 33154 28284 37934 22071
956 43402 1652 10047 37363 31159 32510 40028 54028 5279 5534 84744 40075 45263 5326 48217 27065 70493 26560 1355 29389 37934 1019
957 1384 721 7228 5649 35394
958 36768 26119 4457 6211 10032 9289 60833 64199 7380 10113 25113 38486 23054 46750 11575 22510 20577 22581 30929 10311 1338 41898 38821 28641 21970 23611 48961 10086 23559 36117 3851 11607 32751 8409 35485 74604 34837 37547 22607 22692 22636 46768 46306 89953 26959 40719 8521 73939 22888 45284 25108 2874 7971 22883 2873 74707 55041 66331 27672 959 621 29760 31326 6828 20 38118 34251 24007 23773 34787 33513 388 404 27648 27644 134 6292 15 12063 74 6615 35069 1014 27367 3075 27638 166 27529 23771 6501 1432 647 23797 30291 3990 34208 8315 24735 34830 29636 34081 24393 385 52368 34220 23696 8290 32951 6918 8766 34158 12382 35076 962
959 46005 59106 11873 6801 8773 25391 10840 12294 714
960 4659 2681 28923 4680 26090 32797
961 28922 7156 10861 40952 43898 60481 23693 2352 38993 10749 38404 31248
962 5682 382 6906 613 8377 6603 8322 36206 7984 5357 5615 6627 6292 6626
963 85841 59945 59946 72884 79774 89390 64898 76896 88967 74239 59827 75679 51573 61257 72885 74124 70121 84506 76208 83894 61076 70878 70759 71944 86908 62383 80254 83718 40311 65690 83702 85981 79086 72955 91389 47284 87374 81163 76729 88937 43624
964 12815 40801 5256 5650 41594 35656 13014 24607 46429 34464 1276 1288 6180 32105 41597 11872 1468 641 25190 7213
965 18525 33387 19300 20751 21030 31848 7600 56572 14077 31094
966 8132 35583 432 58069 13050 27553 23802 16 53139
967 43353 11767 504 24639 11765 44929 28118 32744 24597 26670 10518 37388 31442 43174 31682 43177 43181 40609 54895 44928 43039 35880 35766 43183 8994 9452 9480 42287 43184 42919 36551 48211 43364 50615 9005 54897 50616 43179 42447
968 37587 34003 12145 31503 38848 60481 10843
969 19443 39495 37973 6260 11825 37496 5218 39520 12851 39586 30796 39653 6913 59350 43485 88581 91273 10262 22999 22315 25407 13085 26880 5644 29975 316 8729 12374
970 38918 29579 23703 6366 28600 35586 24854 21643 1542 30463 21778 22067 28365 30998 38164 483 24728 42033 1807 1564 36137
971 50652 5925 5931 24675 23529 1257 6539 28868 42234 1795 28943 1490 11913 21640 691 32197 24826 659 24101 6544 29837 1688 29019 65 37076 38221 139 5328 28975 23979 25004 1368 5956 30663 27774 8395 23963 1769 91 26593 1775 22025 23785 8838 11638 12479 6498 1951 33262 7504 621 24673 49028 29297 24946 8861 5329 41358 1460 983 1485 6508 8391 28216 43421 29830 705 10824 23059 40288 2045 12297 20504 38164 23999 29385 28408 42033
972 43779 7285 40712 34214 47633 28436 691 45611 35946 1364 27802 2352
973 21504 31126 1543 10687 35102 26765 1421
974 8256 38 5370 24000 12253 23708 17 383 7644 9453 27742 10937 7477 23210
975 33712 56193 57092 25519 36272 9020 46205 33719 11843 45420 35345 62630 37562 39875 35897 32530 33720 71400 11845 33717 33718 39930 39933 83122 11849 11847 40044 40033 33436 51645 39863 36268 57281 39833 40022 60835 11859 56015 12322 40113 39071 29183 1274 40028 34138 89246 40205 40263 40261 32837 4770 37564 40109 59357 40275 76767 60964 42019 36882 57284 59363 8271 82944 82945 53300 89899 40276 11867 59377 11188 35571 82158 83335 59378 57289 33491 46606 33484 73185 33504 35570 34140 82156 82160 91576 87339 91384 86274 8272 55005 56 30729
976 12202 8278 5370 27661 8783 24786 30467 35894 1592 1603 6676 5101 47698 27642 34787 5445 31130 28290 33001 6943
977 24901 26558 26888 24316 11776 6360 5736 1370 4908
978 33720 11843 29183 67281 33461 33463 40169 40108 41676 46544 35566 35571 11848 11 975 1754 31215 2379 401 23039 10826 28875 8030 91 26105 25147 28847 1377 143 5329 114 373 13 55 393 683 7129 11933 374 11910 5964 40293 23077 5649 1868 21812 694 21814
979 21769 21772 36100 45926 5434 28773
980 7367 31758 40870 33814 23210 23708
981 15679 14556 6595 29001 8946 28697 4839 5182 6275 22228 1550 8036 1595 5964 7220
982 1276 1534 5978 1547 35934 28333 37757 85
983 39084 6414 37761 53954 7129 25529
984 10409 28065 5964 43036 28064
985 15264 30875 24941 24907 45626 595 46153
986 11025 33355 52184 44847 2549 32898 50535 31276 60597 27068 79226
987 164 4968 1016 6057 21992 16504 1034 12206
988 33850 13060 4798 27213 27153
989 24598 24634 23329 30613 48466 58252 30529 29271 52058 4939 30206
990 29997 35666 12042 7246 41921
991 77820 29872 1704 1639 4905 1731 12263 14553 33816
992 26880 10 7873 1492 7872
993 86975 33495 35457 10410 23034 29219 43316 7726 12760 24484 1415 34209 24037 83230 35077 8442 26532 29860 656 11885 37938 22993 26698 26808 1006 43439 5472
994 5898 55065 5115 33913 6273 6022 14505 6554 39236 24758 29522 21471 4797 30999 9046 41991 29509 34068 27985
995 31532 31526 3234 13723 382 1582 10 26058 15557 4949 24258 10955
996 27740 429 11279 420 29217 26879 23074
997 1809 1172 37756 8542 6124 8161 6788 16512 31656 10826 17 8839 29888 32784 31880 4881 8925 23116 28255 7493 41858 22097 24137 1554 8317 29430 31726 14 11936 1746
998 409 7224 7222 659 28073 28076 42992 28413 1754 24398
999 30797 8269 12606 53826 36841 6249 43898 34214 25014 40871 53346 38843 37109 9671
1000 42576 4892 6030 24084 778 732 12030 40740 27094 5991 26843 1103 10710 38
1001 2212 34908 12883 294 36498
1002 81474 49435 50011 56504 52223
1003 427 7410 566 374 9172 4906 26473
1004 69680 26214 8060 9028 5440 1069 5373 12434 52
1005 30929 11557 50043 2760 1496 1927 26079 32964
1006 7228 1792 673 13057 637
1007 120 1733 32779 7745 24864 1273 1239
1008 21830 8023 12338 21828 8532
1009 6200 40838 32859 23699
1010 36162 40928 30506 667 5703
1011 48608 35202 1044 2240 1808 44565 7181 11430 1004 1438
1012 562 21659 11872 27522 27685
1013 12418 5374 30459 29366 395 23187 23185 23193 696 14 23427 22074 33327 30508 30535 22067 7512 21767 23179 37670 7643 5479 23189 5953 612 23182 6360 23188 23191 570 23190 5938
1014 18033 34548 29928 13048 6245 6244 29929 6023 33141 35336 6246 4103 6035 6223 20486 79187 3870 11829 4383 1020 31173 27432 33220 63825 58073 9012 20509 23617 545 35896 81419 3542 54904 50779 33793 47140 11868 81907 42490 35185 62415 33491 59905 76393 72639 46042 6922 1613 7770 45131 28266
1015 14983 25150 14405 36569 5790 9757 14157 6464 4854 30282 21545 16749 15129 15757 11946 9561 30533 46746 4866 32878 8159 8396 4876 15524 28801 6120 18124 21041 3762 17058 22308 40852 13654 57076 30532 29414 400 19269 14404 10242 20065 23611 46785 14366 31700 29527 40731 28166 21384 28788 32943 2895 31329 39267 40729 8368 6468 382 36288 24229 36829 74314 6781 15702 5414 417 23482 23823 23633 8522 24874 6544 56923 23985 54243 22573 25342 32691 29449 6190 27668 29946 31862 4968 43131 8205 43268 35449 48358 26666 9458 1606 29524 30468 15394 25388 29932 27669 46811 9413 24827 24950 1594 11776 1586 7971 59291 24835 395 5404 6087 8563 6906 11641 28697 24806 1389 29972 27670 8501 31000 33591 5711 5578 10388 30218 3870 23618 7860 4383 20509 46042 42221 24839 13818 3102 23189 8318 57155 32755 23182 37537 53355 23191 11138 43042 30472 6262 35914 46553 46041 4880 28638 30276 46597 7919 18047 4747 6299 10726 87047 12394 647 6577 388 33752 38918 8820 23235 23305 30471 1133 34070 635 20504 8420 8323 22041 604 32994 2078 1872 33145 37748 28370 4773
1016 5831 39500 39304 47842 40248 10826 91 10834
1017 40803 10527 37385 34552 47153 48806 7716 23104 44362 31338 62409 66737 28872 7891 114 9404
1018 29366 24772 23049 34155 34157
1019 21767 29595 48010 53625 56285 72633 27068 61555 45471 83086 966 51392 11862 43573 63840 23356 87313 57132
1020 47232 495 53486 14852 14902 29673 31762 6646 45504 13066 9795 309 8694 14946 14947 31833 7028 11014 13566 13631 14850 41031 40421 10881 6963 6956 4800 21810 2344 49304 14781 9789 31311 29636 14344 28097 14698 14704 14699 9535 14700 14783 14251 11030 21809 14696 28009 14654 14655 14291 6949 6351 14612 31797 14095 14653 42459 41147 14488 28004 14533 12175 14531 14484 273 14432 24495 31308 27548 14522
1021 5066 16065 9314 13859 14871 42292 2700 5062 4799 29567 11987 4837 15633 5983 2381 2130 9235 28388 28401 34072 31029 9960 45585 9311 35101 36494
1022 27933 38396 6043 27514
1023 5145 37516 4902 4903 432 4904 36827
1024 1502 41012 27711 4210 1389 31001
1025 729 656 1676 8447 24435
1026 12360 11306 1002 11111 45802 1133 10155 24393 6804 24039 10150 1010 37139 5468 24086 26746 4795 10165 30290 29879
1027 46291 911 72775 11591 46292 13025 69278 22997 35919 13078 395 36999 21659 32821 7293 12291 503 7289
1028 44530 12387 10813 8771 394 29606 31612 11665 29382 23306 7874 8640 615 8002
1029 1355 11872 23979 149 211 29016 23976 551 1916 22990 5466 679 1997 12328 24345 8072 7834 12857 704 6531 28591
1030 41464 57 9322 41330 114 8749 6827 728 10173
1031 12490 60 34258 27481 8729 6623 67 8739 395 8093
1032 9057 6877 9059 31074 5404 9062 9063 39004 33058 5615 8070 42224 1603 9070 9054 7803 23655 40908 25029 5579 1871 5411 5433
1033 11314 2579 1083 30120 38462 10147 24461 2897 35133 44636 9529 31047 31587 23427
1034 80835 56002 83871 84255 14080 27856 56517 56146 60922 25834 72524 68126 57639 65438 85082 84250 76570 51030 58030 77491 64328 60550 81073 68111 11264 10984 6438 7800 29265 7409 7801 12127 10982 11214 12126 183 23828 11229 10980 7821 12129 25544 11295
1035 12126 10811 7798 10975 7803 9977 12130 29701
1036 38393 39967 57876 61188 85160 45122 60033 64084 43531 59210 91237 82653 70580 90557 88637 1951 38569 5632 24677 24777
1037 28339 23817 4902 4903 4904 12334 23147 29897
1038 29361 29006 44605 28464 22993 27054
1039 286 13607 9679 9751 14571 9794 14656 11218 7815
1040 979 24677 4775 1872 5736
1041 7915 5693 29421 30186 12338 24492 24737 10764 31600
1042 2923 59479 43311 29148 11142 40297 11868 31325
1043 12838 60164 53526 13042 7891 30716 37646 35550 30957 35876 1324 32676 50221 52031 37907 48765 30561 23593 32747 13052 52053 10655 39368 30803 35322 36278 39395 35050 29938 32765 11817 52687 30972 33695 35324 35413 32738 33696 61045 68787 11820 13046 30982 30208 42661 41606 36280 12258 30986 48400 52062 54509 39448 33024 23613 53050 933 52263 30991 39174 39521 58316 78339 55224 33437 39484 42862 34133 35345 28788 46543 32227 32740 56194 51645 39587 35886 51646 32761 31710 32522 41261 52601 33495 38916 52153 29171 39683 46202 67463 39586 43913 60226 36272 54203 44682 62621 44074 53048 9493 30200 46205 51612 39820 77818 33450 39837 38215 56014 36275 30211 11856 23640 35368 76767 55909 86839 82475 40052 40117 40101 57281 40058 33467 51654 40218 34138 73865 48902 77619 57290 52921 78150 80381 89075 57595 90791 30248 57295 85618 85501 7206 55 25214 7224 22048 118 27470 14 42 35415 26644 12272 8104 177 27109 28221 29281 5328 56840 6927 5643 102 119 38 196 31319 6909 12273 35912 8 123 43733 33142 606 68 105 390 662 12329 33269 22995 37004 671 12320 23995 23988 12281 1585 8108
1044 22580 6250 77649 48415 240 40764 28216 28408 28410 28409 8446 25423 650 25424 8429
1045 27880 5390 36500 37076 10837
1046 5976 1652 7785 26481 34838 5202 28850 1074 42368 23981 1736
1047 27496 29305 42922 6731 114
1048 30467 1561 23021 373 13 27646 11906 43957 374 382
1049 29977 1927 6341 26473 27761 32570
1050 29374 46444 33300 5113
1051 49115 56694 10744 30946 10365 29975 971 31572
1052 6283 16 22061 12395 23674 114 32 4881 165 28216 13379 33737 21814 5839 28973 373 28408 421 225 138 55 694 62 7222 22025 6909
1053 30107 32325 4340 46106 26947 30899 45571 46109 8993 42199 44773 56547 11596 42205 40248 7148 8315 41536 55045
1054 31300 11659 4944 30007 7340
1055 8099 7825 10976 11295 10986
1056 731 5326 1118 2046 33307 13894 28216 21474 75140 13859 14871
1057 8634 8638 42413 28360 28128 28384 30279 27700 55046 5622 8623 8625 8621 8624 28100 8633 28657 7976
1058 606 34456 7229 648 1679 120 40696
1059 25041 26710 6912 10948 7 29241 4211 956 27160 29877 10953
1060 34200 8387 27006 10484 22223 38195 46401 22226 6479 8528 27667 7773 24726 21476 31507 43 6405 6665 29383 23269 31003 1402 30736 29217
1061 8990 2947 26857 29148 51278 39751 37922 11844 50197 40002 34813 47823 41556 39990 40271 57560 47773 37431 63336 29212 25404
1062 31727 1835 12369 5434
1063 28431 211 34452 11646 31238 48682 26473 26575 1352
1064 36092 29669 42935 31299 50605 70041 59540 25241
1065 5005 43779 2709 26199 23287 26513
1066 105 22064 4936 7985 5476
1067 5964 35706 409 40965 6498 21622 551 29840 5237 5329 43064 7217 4956 33304 6486 24409
1068 12707 13146 8987 5867 36259 22236 22250 33438 4429 13141 33394 23513 9471 26251 12712 19421 26948 20087 34213 19991 26857 12827 1308 39272 10315 10322 9267 19987 20126 20557 11532 8994 20210 20496 3669 4761 20635 20841 19932 8998 4770 6182 32505 20712 39280 22281 21149 21056 26148 42058 21092 21529 30782 30937 41861 13163 25114 6176 19298 24624 32993 10716 43005 32636 24953 546 40 7110 38017 21828 12355 17442 20323 6180 8409 30954 28107 42755 2521 605 12947 41468 1104 8339 7977 30184 1550 35860 32878 36676 12356 5913 1310 19986 13032 43357 6241 33002 6267 44642 9481 36551 24937 24649 22297 17707 26227 9005 31273 17114 29902 30186 29083 29446 1635 1703 6318 39349 20072 39392 10590 41660 36554 37698 35844 43566 35317 35862 6818 7790 7791 1690 627 27350 36354 24828 20917 11741 38487 12844 13046 42181 11821 44671 33433 36559 15026 37314 35437 42605 6261 6214 39508 13030 11822 23619 6266 5348 3965 965 46941 8720 24833 40784 30187 10639 39595 35873 32089 32053 42887 12850 2040 8774 27066 39779 39775 49637 23637 35449 34813 1374 24809 22965 25293
1069 9172 728 23838 22128 31837 12505
1070 32308 17408 40954 43425 51862
1071 6545 31514 6006 31539 31524 31517 31518
1072 7504 23037 7434 29796 10861 21475 1459 23049 42143 36502 33728 46024 6521 7797 12487
1073 12256 58751 23606 66088 66096 31548 48712 31516 1367 6006 33054 31539 28449 24369
1074 6544 41591 37703 4622 42893 639 42367 28186 27875
1075 8401 27145 10190 28118 37324 4817 33043 793 1839 13105 21517 18180 3546 480 34842 835 12784 17619 17384 8969 49116 8194 3617 13111 26670 5625 10518 18188 40749 18181 4396 4301
1076 24441 42664 640 27857 35393 1688 26642 1887
1077 8363 23547 30937 31926 1352 12863 36058
1078 32391 40150 39763 47635 7959 78750 39234 77419 32403 62489 12029 4549
1079 5277 1754 26593 29589 30745
1080 23116 417 6526 33127 673 36855 10750 4789 38431 1642 9360 7008 1539 14505 6370 4785 7729 6525 1550 33054
1081 6789 138 20727 21050 35387
1082 33294 33925 3509 3968 6474 31266 22407 3821 10874 24558 10024 12442 22483 30826 24695 33964 8841 36220
1083 27950 684 17 27132 670 49 2426 37625 23747
1084 28259 1234 5101 26879
1085 28977 5594 25046 104 10481 12405 143 21615 7770 28406 8323 12320 30504 3629 17 33126 1550 427 6405 29516 6793 596 28157 24809 7227 33263 29370 8746
1086 40070 11855 8696 29184 11788 41619 49094 2936 6335
1087 4785 7034 5370 5413 12333 12323 9070 8051 5372 6914 12299 46 47698 191 25324 4936 5433 5406 4981 25029 159
1088 10963 14055 15476 5622 8666 15644 15777 15770 34234 43536 16392 16408 16119 15782 16691
1089 43222 60033 68361 30577
1090 3199 684 23773 3075 28329 35414 394 183 32582 10775 1924 27725
1091 6486 11071 5225 2190 35774 29946 390 36079
1092 5444 26720 6528 1421 24484
1093 650 1845 24059 12360 30095 42113 45609 46298 26888 9245 2534 22123 22152 25482 17454 45164 33218 12648 3300 30751 8415 33385 9202 15942 48404 52508 26505 44768 33214 41520 55921 10158 551 42716 8873 50223 55051 30733 25693 23838 10089 1263 27053 23835 45302 57121 31642 48798 4862 12686 5117 40708 1089 74951 22104 10706 5225 48354 10150 41681 12022 8446 27078 24023
1094 31527 395 31510 6537 8322 34442 23030 25423 23037 23049 728 6521 31514 8728 5466 25424 29793 28831 5369 6522
1095 10677 38454 41786 59384 43626
1096 1603 1875 25029 5369 186
1097 12213 8300 7269 28277 28282
1098 46108 32345 40713 43443 44046 26946 5252 31194 46789 29911 47533 47767 11530 26626 38990 30073 71588 6455 46296 22691 26747 23797 29974 1405 8842 9200 7200 21469
1099 10701 46584 77490 42914 32234 28461 42608
1100 383 23425 7331 34822 18415 41517 32413 43894 1585
1101 24718 13062 44083 28852 5837 24298 7129 44527 32975 35255 28048 7504 379 3164 28444 373 13 374 114 52486 5021 447 1758 28055 6317
1102 8609 48554 21740 21741 36787 23651 10864 6808
1103 1370 7914 32998 10542 5281 27536 12279
1104 26275 7497 983 36522 5654 28275 1364 32582 28528 6546 24419 8867 1743 24702 11944 28830
1105 53260 51928 18605 56423 44823 67422 27850 27723 12119 149 7819 10976 10811 9977 10982 7825 11218 12123 11271 10980 27732 8785 8626 29266 7793 12132 11295 11
1106 33203 34998 50229 22209 1775 39123 10303 10566 9148
1107 42799 19141 72278 39516 66292 62374 70388 32998 62359 77717 87125 47941 61479 59387 2177 35593 24702
1108 26518 26519 43593 26520 34291
1109 5328 16394 8363 30065 32363
1110 28763 11107 374 42927 40479 1377
1111 7808 7815 11287 11266 25815 9627 25646 34152
1112 49734 5424 14854 12489 8789 12524 20095 26945 6478 41668 34803 8900 15491 15129 7262 8426 5701 23291 493 17268
1113 1707 11332 28929 1709 1743 1293 8253 37651
1114 60135 5612 134 27742 14 12029
1115 1757 22313 1063 1046 367 6859 5642 10939 5445
1116 67282 9421 11277 5357 29606 7002 31116 25441 27369 28100 27092 17252
1117 23125 11305 1432 1694 30492
1118 4502 4201 3468 4609 53860 37114 10699 33123 13004 60868 1973 24364 7156 11436 26265 37139 395 8852 12535 34446 38850
1119 10826 31963 1483 26720 6585 30316 27743 34827 24672 29363
1120 8080 1294 8984 75
1121 37919 42990 39694 55460 9781 53047 42017 19159 80675 7974 12617 59380 65540
1122 35074 24948 32570 24393 23017 29219 36006 8526 12500 29609 28654
1123 44 38426 635 1353 1069 10951 34814
1124 45800 4640 42714 40070 47638 23660 41652 9557
1125 1947 8587 29755 21874 5406 8040 30182
1126 35232 3321 12956 4457 7976 8108
1127 27082 28899 3387 11663 24612 31508 32965 31750 18502 46750 23006
1128 34990 11748 6785 10720 8979 1361 28430 36325
1129 29505 664 118 606 32784
1130 31014 35564 42526 44935 34984
1131 45133 10790 11289 157 25291
1132 8884 8318 6929 7642 4803 8261
1133 39945 11882 8423 49077 52640 65398 44589 22260 42059 27867 32796 28905 30826 49150 43804 42719 46296 37369 91009 33150 7243 6083
1134 27021 5362 30616 1627 26641 32996 8484 4795 5985
1135 5607 24772 1537 27244 6692
1136 32996 373 33603 32017 33907 118 13059 1793 44506 30290
1137 2842 26696 32922 34630 46016 41994 8284 8626 11213 25604 1743 5737
1138 7469 9489 4729 32086 39667 4730 32619 1184 22596 34885 12261 32090 32089 40412 4745 34683 27069 34777 13004 45469 39987 37134 31935 40070 42714 32392 26957 47758 22838 32393 60521 45636 47638 40241 40198 40229 42099 84745 87875 32398 57156 59368 31049 7961 59373 50651 74916 27074 6041 35572 35682 28815 40126 63686 27011 42529 24393 1364 12168 26839
1139 10397 33240 23637 27432 35056 38227 7919 31717 38393 40259 54442 91575 56419 35577 8323
1140 46796 12642 38849 52570 37613 31758 8863 10793 26287 26474 26473 47162 38038
1141 906 34521 41719 40401 32106 42001 32620 37397 41623 40407 23101 23100 47103 932 29211 10660 38214 46504 21579 33247 42559 25154 10685 49608 34611 33449 29951 22752 56305 25156 25157 40011 42794 71258 29167 41556 42365 114 29016
1142 8353 33771 52192 10686 26786 649 36118 12760 24085 10406
1143 29924 45136 12303 63979 65520 53870
1144 6060 7356 1692 23696 45769 23829 5308 28597
1145 23269 28443 1671 1677 8781 679 23270
1146 56086 85213 7803 5435 1603 1871
1147 30990 39537 32692 32699 11165 24196 42232 30780 42862 41261 12454 44778 32738 39663 39741 35360 19719 32450 546 52056 9016 46074 46468 40304 27068 40488 39835 45470 40485 39910 64147 36811 13047 21465 39789 59445 43455 37922 38593 65466 22771 40058 43239 13028 35362 40211 8231 20158 40057 40257 22299 35686 40260 36275 40273 11175 39778 40262 59362 12839 39951 59381 40276 52924 43460 91237 26263 43626 12586 11149 43461 53731 43462 91320 3671 76416 35576 33331 28157 24721 143 7206 23244 53595
1148 9228 9226 34645 12664 31905
1149 276 14105 6755 299 25750 25748 14616 14903 6871 350 23351 7822 26880 12320 7410 10 27964 11267 23789
1150 42266 6451 773 10957 36051 1849
1151 2065 5529 17637 22186 1636 23060 12033
1152 38003 7352 32874 35238 35882 1314 11558 10210 24117 5530 34603 36841 360 50120 6226 28538 33773 11808 6203 6246 12485 21924 34552 29483 62888 21560 14074 37474 8423 596 46977 16314 11609 33698 23052 46291 33705 12930 56737 12901 61932 27537 29496 2951 27294 10951 46543 21597 4518 10701 34019 110 29155 7177 33495 47823 11859 33443 40259 11843 23099 4701 40497 11557 29956 14404 57975 85050 29946 40780 39712 81930 34096
1153 14635 13913 15004 15145 14659 14830 15046 14992 15051 15043 15075 15149 7581 14945 15301 2608 15169 7584 14591 15505 15424 15467 9884 15584 28014 515 15576 28018 2532 15718 15870 7448 14456 15934 28023 16020 53791 16252 16248 7577 16176 16251 9876 10883 27949 27950 45504 31296 5637 36086
1154 9313 36152 36046 35939
1155 83834 66696 56071 77871 53218 53220 60074 60075
1156 87020 63272 64588 78563 59805 51571 79854 62696 67671 75109 61379 72882 89706 77539 78500 89707 89578 53032 67033 49724 80556 85674 81294 80524 90419 38959 86937 52860 67528 85159
1157 69680 114 32483 7803 26537 9068 427 23708 191 1868 28082 25433
1158 11635 35954 28434 7250 29219
1159 64890 22809 40090 74209 40095 40015 51614 36738 85606 67379 11524 57975 88943 49161 88970 48207 73998 35576 24083 33506 39795 12162
1160 59297 373 13 114 31221 374 24260 6508 32206 8446 1579 23233
1161 4222 46192 40487 34572 34509 12697 4060 31450 4385 39374 4411 4429 5751
1162 40929 30761 33052 31023 47531 1017 10734 10727
1163 46612 53345 43424 51657 48724 2842 35059 41786 32589 61246 83555 87642 45354 10150 10706 34220 43807 27121 17251 41418 35914 1201 1432 8850 35690 34120 650 22996 7156 7239 1360 22990 684 21758 6506 35075 27878 34558 24849 36612 26756 17252 8855 41527 22043 631 662 7874 32968 1435 5453 12025
1164 7331 4956 6828 377 527 12374 1459 5616 566 32608 1868
1165 5729 6076 31053 4811 22048 10 11873 566 8811 29755 8599 8509 570
1166 17049 12958 24498 59236 11455 50038 3952 3928 13130 12227 886 42150
1167 6460 1392 29350 7781 26563 12071 7975 32612 34004 28438 28446 40913 28451 42986 41656 42987 31203 34706 6355 26303 6341 37614 26473 24207 28453
1168 5790 11799 9961 8194 18036 11056 31428 26670 29462 12696 4301 10527 11941 24371
1169 13553 51150 5397 45902
1170 3821 11693 23731 8386 5932 38302 28614 43353 17560 27295 29318 10443 27320 34071 1588 23289 8358 11916 21634 44392 11917 29830 20788 21661 11777 11914 33831 5692 21662 1876 27773 28093 11910
1171 28111 5961 10962 4841 3287
1172 15074 31098 46817 42838 15210 16330 16421 16505 9046
1173 10059 33688 20712 7891 10388 14 82155 7500
1174 143 1486 28152 30290 32777 1404 761 40359 29662 1403 29757 24564 26786 7239 215 23252 30632 186 24589 23787 29013
1175 56 29879 26748 42753 14 118 38547 72 21828 44 12329
1176 1899 890 29862 5381 32955 8568 5700 27217 893 894 36356 47135 33317 47254 33971 30791 33767 11576 1791 30568 588 2807 1141 39989 5472 23313 1061 10406 31216 43081 21831 24479 8381 24279 26640 38311 114 24792 39238 36793 7025 31887 7200 970 26751 38576 377 27124 1186 46775 1211 1034
1177 204 25838 157 7409 11289 11272 149 11214 10982 11265 10985
1178 31290 1104 7950 48986 6606
1179 22973 23003 33620 22983 34452 7850 7239 10707 34116 28434 12045 9172 1405 26575 35704 24147 5308 24144 27879
1180 1364 26696 1063 2057 29602 38827 33745 36383 23777
1181 20830 8241 21139 23601 23595 38916
1182 77837 21848 6989 5587 12422 6954 6955 6969
1183 7504 25128 25133 437 25047
1184 28257 26800 23003 9453
1185 47213 69416 83515 82368 36584 24646 48340
1186 40783 24778 1402 5357 5643 36829 8631 35675 23328 2373 24164 30459 26801 5615 32220 374 30507 5409 27445 8630 21491 22065 7720 8640 43083 12433 8599 25353 5414 37348 28365
1187 1709 11883 1743 61719 57610 30312 8023 80718 71261 47393 31938 437 29506 8026 28369 37674 29530 36647 29447 23970 5669 28366 34388 8046 8493 19308 71104 8030 25359 21836 5583 37146 31056 40297 44020 27297 8239 1581 8713 8041 23423 21974 21828 27902 27910 41824 38883 40785 25303 34253 40783 35675 35674 12416 562 21616 27824 32991 28370 37669 15638 33945
1188 26290 8354 7156 7153 25229 34283 31347 38565 27162 25235 12395 7364 3229
1189 24635 30676 8436 37140 1432 6864 8853 12028
1190 7482 1069 49 7833 29181 27473 23015
1191 31527 24577 25426 31514 31539 31517 31524 31518 24366 5935
1192 9340 7196 8363 22118 40552
1193 427 41582 8036 31554 45879 6514 708
1194 8825 36821 401 35109 12121 30766
1195 12719 31895 8444 10706 42369 29021
1196 89343 9071 25123 9074 30391
1197 12024 38462 28885 42893 43057 10156
1198 3464 10165 17252 27358 621 635
1199 29148 36737 38528 26164 9066 9045 29232 29642 32455 41561 29246
1200 45196 39710 11868 57975 11557
1201 44354 28406 46998 7235 36223 35911
1202 1320 1633 1663 7856 6456 7478 26802 12209 23243 28292 27863 24142
1203 32975 36569 23202 41012
1204 8395 7746 48442 29219 8391 7495 28056 35947
1205 670 57 12329 44 1890
1206 427 6022 6575 5614 12862 12423
1207 30943 777 26820 57263 2697 6580 12356 1862 991 46518 10381 31284 12425 65165 1746 41261 820 24665 27068 26458 7891 28880 84459 2732
1208 33151 35666 41623 60481 43370 1011 12897 1279 44119 31656 50703 42523 61181 59369 78263 47153 44837 72 12840 42922 29863 12428 74 29971 5965 41287 23739
1209 25711 59508 157 11273 7817
1210 7410 5476 195 6589 5725 7803 409 1872 6076
1211 166 172 186 191 251 3165 29245 27244 11942 8634 8638 11999 10958 5628 9596 42413 6519 28360 5649 8652 45629 8647 29252 8650 8666 13460 13484 9646 9751
1212 11942 28587 28658 45629 23701 2227 24169
1213 26718 684 26736 30821 26715 28434 8573 24891 1465 28519 6533 32212
1214 68655 78520 59994 53878 66161 39734 40159 65893 60001 37270 85639 83884 88363 83886 81378 81429 40169 42488 60453 83893 83895 70540 90685 39884 78434 78460 37610 38036 721 48 6984
1215 38968 46270 41207 21549 35305 20016 39353 29926 35724 26038 23603 22308 44188 10654 44121 29932 28788 33705 29946 33455 12850 29944 32526 23637 34609 33466 29954 33020 7917 40156 40128 29960 29167 46564 7948 55594 40055 50591 33794 62706 31834 25275 31093 34091 5434 24962
1216 1090 6387 5101 12157 8377 31650
1217 9387 6098 2733 7328 6101 6152 5954 31021
1218 31 188 10234 10791 22 2914 22006 12958 1890 31669 20787 8984
1219 43 10836 1104 6827 10853
1220 27237 8951 11458 12149 2936 7328 27441 6374 24781 11680 23380 12527 4843 23383 28864 46406 5087 49111 26490 34804 23371 337 22134 4956 5318 1417 5519 395 9449 6601 32291 23405 2658 23364 1115 33204 24440 30684 16210 10779 3235 12543 26916 42209 6090 31519 44698 25052 24433 35652 2746 8058 32256 23874 1169 10861 22966
1221 27343 1096 520 2209 6160 975 8395 691 974 5237 1361 23790 8833 8896 8336 1224
1222 8659 50057 21763 37567 25268 27927 38604
1223 8323 26285 429 714 8257 10006 1384 23 367 440 7202 44 687
1224 8663 34231 3106 6411 10 27985 21789 7028 26160 7002 28924 37054 22026 670 7207 7186 47105
1225 37597 30504 23998 41834
1226 51406 51384 25291 29283 38235 7410 28110 1924 29588 45879 12320 8033 29257 21483 33798 25239
1227 34242 23929 32944 22354 9049 7784 25134 58689 8417 21827 7527 28269 24454 5804 8877 41343 1497 10750 1405 10861 24085 7406 25286 24092 9028 29510 36827
1228 31120 5839 1803 12866 4938 8909 6637 13197 4925 17
1229 26021 61580 5638 9106 9024
1230 93 2407 5237 25229 27704 280 64206 29652 7562
1231 9583 34091 191 34920 21793
1232 40382 30134 868 5875 4395 27293 35587 24116 28413 1817 35506 26985 24604 29333 5837 27111 10452 27211 241 31242 5999 65 36787 34082 374 41994 29976 7471 1065 25351 23651 39254 26592 21680 24337 32361 8354 1868 118
1233 35243 12843 59363 43250 45780
1234 69075 69077 46086 46092 90850
1235 39405 32688 39389 39795 11158 11164 35360 22657 39415 35866 39831 39812 33246 39110 36979 40052 39873 22852 4165 39863 52678 29962 40087 61185 28206 40023 39874 40245 40187 40253 33256 40246 39732 91556 26691 80675 81152 89076
1236 57347 82009 20550 22593 26438 7045 9905 15918 78530
1237 30135 18803 18488 22019 27411 57558 27423 46770 88338 82958
1238 23770 43448 23243 28271 36006 30998 33916
1239 26589 23991 1990 12120
1240 79230 37428 75966 41805 41806 61476 42999 48807 85750 30241 5837
1241 79363 44757 23507 13092 32624 31935 8850 48721 1924
1242 119 354 27742 68 62 44
1243 6407 28163 28697 2733 43998 11914 11779 11430 5539 26754 34438 27767 24061 9166 28450 9375 6671 15963 5078 5329 32262 1758 12657 28309 848 37533 43385 11784 2673 9103 31729 56776 2676 6929 9400 7976
1244 38089 26090 28575 29116 33119 48243 7412 14141 34940 43584 8259
1245 6126 1670 10150 8508 551 6958 34702
1246 60258 51462 42396 42395 29961 57976 42896 58873 10906 57972 57978 59353 53979 42322 29202 57984 71272 82487 42223 52685 42398 26213 59364 41557 50478 40598 7952 59365 50476 11189 58328 59349 59660 59658 59656 57975 57878 76725 51851 57559 37428 47638 57875 61182 53017 53978 40678 56895 59355 57284 31719 62217 22922 37 42019 33477 37434 73185 90078 50473 11861 79363 29966 57877 71205 28209 43457 10908 54456 42492 37429 56306 53517 42523 59657 8271 59359 58916 59348 39233 7954 41460 57157 35450 59350 59362 59358 54027 57283 59360 22887 59361 51770 59356 57294 11188 57289 42489 57282 59363 42487 44467 52684 69313 57876 63684 42486 61184 57971 51766 55911 50474 46890 47637 62215 43264 66973 43265 45122 54249 28205 59357 59351 59354 57560 37421 50538 57161 88281 59376 59379 57982 25159 79998 57987 59371 59384 59387 57981 59661 79359 62219 70538 79360 79364 59370 51296 36895 59374 79361 59372 7961 54461 26691 57979 49160 61187 38330 59373 57985 52915 57285 29741 59381 25158 82552 57287 59378 82944 59375 59386 73496 80240 43458 75563 64908 54458 7962 11868 33484 40599 35888 76777 53300 29970 59377 59903 35569 57290 57292 75659 82809 57291 57980 83532 42484 57156 35062 43698 34020 54459 62982 43266 57288 59382 59385 61188 39232 50481 53554 59380 50833 10911 50834 87632 43803 59383 10912 10914 50475 57983 75978 42718 45581 22950 54462 11864 81152 55797 80676 79362 49798 86880 70540 71274 43463 40985 51768 45263 91390 57160 82943 43055 83359 11867 43770 82945 91574 66937 40984 71804 42323 73189 50665 59366 35568 36771 57295 57293 89234 26692 88123 52923 57594 35452 41904 63685 84555 82013 63686 82486 49163 29212 49912 43460 85160 57989 50836 75057 62983 62984 91200 29214 41558 53507 54463 83535 10920 64149 89815 77490 82184 7968 91417 87462 51678 71280 71285 71284 69103 70515 82489 82491 76385 91416 70385 71282 81154 81493 91476 81492 62416 73612 71273 91575 33491 3713 83335 71276 75975 17055 78151 91237 89260 42261 91556 87461 90220 61476 91581 54029 90196 91273 82156 36814 83143 42206 90791 83531 88813 82876 82159 72640 91415 34140 91529 43465 91580 90624 84172 81495 44104 62218 42485 52073 88862 32404 55005 56661 44103 49164 88482 33487 33485 43528 43626 51769 57671 42488 62301 68550 88581 82146 60260 43467 11862 90615 88780 37528 37432 50840 48986 28211 65540 63136 88781 86897 71281 82488 90942 71283 75066 33498 91321 90668 50838 59905 10916 33499 77419 82012 35570 91123 89076 34145 33644 90112 78463 81497 49162 33507 43464 71490 80585 26694 44578 89246 85505 7974 43461 91584 90996 91582 44078 32406 43462 85278 84747 72016 65034 59904 35066 52091 32407 26695 89480 33504 63738 75660 77420 57986 89434 89357 88734 43459 90797 90977 83004 62705 59210 83784 82653 90790 43700 54464 71779 81496 70914 85500 10917 84022 82966 43466 90469 57988 88434 56285 76848 47464 88258 90301 43533 86513 84932 71279 90033 89701 28214 90115 85503 35065 89696 56419 7027 8281
1247 37312 54897 50616 46762 12471
1248 24894 7145 5439 1769 1370 1806 1536
1249 44631 1669 8295 28447 40689 52744 26581 44549
1250 7228 26819 1014 606 133 684 31 23967 28591 1104 29559 12266 30002
1251 8849 5337 9311 4051 7292 6084 1402 9359 9333
1252 10874 32238 37101 1924 1813 31310 43425 32281
1253 35587 37754 30320 6520 9559 35463 9561
1254 4902 23892 34445 4949 12333 374 604 6597 4884 25219 12034 7870 26071
1255 36301 59384 24078 32405 42365 10917 215 22049 1655 38254 1804 18
1256 975 24141 1635 33997 691 25317 33757 33052 7331 1733 1672 11887 12162 13092 8827 26846 1459 5950 12498 662
1257 26201 20832 6219 7939 35873 11836 66767 31409 1537 25043 7410 427 24771 25401 11915 5449
1258 2360 29021 29022 7141 29014
1259 12253 8583 7212 114 23787 29306
1260 34154 10826 91 10768 35416
1261 6315 673 6320 6370 5961 36221 26697 8338 36378 36788
1262 3075 7866 9056 38233 5599 27522 7410
1263 21543 6264 8872 74314 85841 42344 32999 6551 28422 32939 11929 28658 10494 35581
1264 11435 34562 48339 4341 39649 45753 894 10793 46593 6799 24364 28433 1014 1924
1265 26157 20238 75856 55278 71873 44410 37058 36581 43506 68276 3566 9056 8370 8625
1266 23828 10976 52634 31835 25543 10985
1267 27893 5654 12422 5690 8738
1268 809 4873 11557 427 9360 710 9318
1269 46159 29388 7850 9148 613 1006 554
1270 7639 14105 25611 4968 37567
1271 12202 12414 26586 24772 8278 6501 6623 27821 6626 12377 24947 958 8749
1272 6890 30715 26505 23579 12716 9451 10344 46063 65393 31161 60854 12369 12804 19071 82364 5370 23613 12356 20487 43652 20072 14829 20393 23592 23641 29952 4627 23642 48737 44924 769 23643 23631 12858 61524 12373 11532 23611 46835 7950 19940 56291 11145 30218 3177 21742 8864 1364 86506 36772 35849 30219 26078 59882 23350 7969 66471 73060 33488 47161 5472 35850 1114 30239 6602 39878 6539 1432 382 21654 35459 23140 395 24166 24008 8886
1273 12497 20491 25231 7413 10867 12471 12752 5370 11873 5404 654 7770 5405 6623 374 615 10 191 10934
1274 24179 126 1028 433 687
1275 39849 39894 33460 50198 39898 11170 26472 39848 32070 39847 40067 39943 39948 39862 39690 39941 39939 33470 29192 11168 32012 39944 39913 40093 39844 40088 29167 25459 40070 7927 32064 39986 40075 40074 55594 32067 7944 40094 40078 38979 11192 38980 40167 11189 40061 40170 40198 29197 40190 47638 40230 40228 41557 57875 54456 35887 42395 40250 86080 40240 53017 29207 40028 45263 49160 40251 39234 33260 39070 49162 40199 82486 37430 60258 29214 63335 11191 42223 64149 32403 57980 53507 40678 89262 49163 54462 30663 55 658 5654 44543 7249 5154 35258 1241 27860 51165 41330 34249 8257 26297 27485 2571 26642 29339 7012 10456 38864 1508 24497 44353 9346 32417 7046 34979 35966 33295 6396 46251 37136 11954 684 1006 24388 4548 551
1276 6681 76 24151 10231 24160 37140 22046 37094 956 31308 29680 26647 6877 28916 26512 21842 1924 1561 8527 44 27642 10 23210 12206 5405 27503 21 721 566 28082 5590 684 11888 7482 29370 22990 7803 5579 28432
1277 25463 25464 8904 30076 12762 32965 32086 8878
1278 12265 22994 7995 24918 23044
1279 58675 17600 27555 1 21997 647
1280 8481 7995 30745 8532 34826 29127 30097
1281 28656 5729 8739 6827 24809 5414
1282 12101 3520 27587 21531 12686 12811 5249 12989 32109 48 670 31613
1283 28409 25425 28216 28410 25423 33841 9055 39076
1284 46203 6237 10669 35882 31703 28638 37405 12260 35872 41863 51639 30967 13046 39431 12845 82757 46283 27056 6246 39430 38487 12844 30809 41309 10394 30208 42887 50406 34552 29949 85402 9007 11829 44337 35870 32522 21595 78321 11835 23612 31708 35873 12848 23618 39485 12850 39654 39661 40728 35838 39717 39716 11837 33495 39113 12369 39796 13356 21597 30213 33709 20712 41184 52893 11825 37410 30207 30200 56534 28555 9492 31173 77965 38781 34136 33503 34779 40057 32531 39954 7927 45367 12261 33461 44403 55161 52710 47857 23643 45545 39846 33714 32392 40121 25520 27068 55286 23641 32067 33496 78378 40241 40273 40267 31719 34138 9493 74552 69313 57155 60483 55392 40099 26210 48708 39965 40118 75939 59366 42560 29970 42118 46842 40274 42983 50539 61599 76775 85832 33499 82156 89357 52073 32407 89246 30247 72639 80010 61778 42720 33488 35577
1285 6827 6918 12312 967 28912 22037 5431 1679 36345 30831 33 8257 31293 7699 12490 7198 10806 132 28924 6962 226 1544 12467 38572 58 5602 10807 8096 10937 684 26880 987 37745 8 25215 10950 8091 211 23013 114 47 10798 31571 373 7005 35619 13 118 10802 11200 25217 714 25213 31925 6506 5569 26644 21 26214 50106 7415 10931 1868 33135 27640 677 24205
1286 11535 52065 26610 40737 4223 48352 46077 42005 42069 34393 79360
1287 644 10431 30577 191 153 9056
1288 6690 28221 35959 29516 35579 23969
1289 11149 47275 51464 51652 57510 62050 27296 57144 12296 395
1290 9525 7871 987 11278
1291 6581 8592 124 21899
1292 29335 11765 36537 29337 29316 27819
1293 38453 691 1 10874 10837
1294 2867 11434 6152 46253
1295 38878 30434 640 691 7471 7995 23995
1296 28114 32582 11305 438 5741 33816 28677 10079 7727
1297 3385 31508 10410 33151 36766
1298 6387 21616 1539 13075 36999 31245 1550 24672 9404
1299 42366 36895 29214 50834 39975 59364 88781 75975 63136 57452 86838 85274 65470 82966 5597 29358 36995 10828 55007 28922 31216 27740 386 42381 23929 38457 23648 755 25301 1508 27710 31553 6471 53797 8091 8592 21879 25391 28331 54232 33119 24847 46104 24866 24856 24851 32186 12345 52421 30817 28215 59021 34258 34816 35919 7976 30524 38233 23033 32793 31218 24231 27470 30810 26930 26182 24233 2373 10871 23886 29876 6497 10820 31722 25293 24269 13710 230 27900 24266 29271 29268 12408 33810 12389 29769 21906 23814
1300 32612 46796 26303 5954
1301 2379 21136 5427 11118 19794 9483 8011 50723 79318 7891 9487 48472 5097 21820 23038 8010 27896 12372 46785 12850 45484 31161 32772 56291 23631 50068 28880 44614 30204 7947 30993 34135 63579 61759 44642 47111 31718 18716 35185 18533 31979 48403 30206 43198 39958 90517 90711 5837 8755 22998 42566 5374
1302 34571 43716 22529 9151 34116
1303 49137 21225 6267 26211 55425 50844 87510 48809
1304 64732 33340 39690 29172 51134 32065 38201 40419 28201 42221 40102 46871 44102 40255 59659 51851 32068 40251 57160 44246 54377 3839 45583 40675 40891 81406 43593 40888 12029 53322
1305 7540 48279 5597 10807 78971 9524 32839 2803 3075 34921 21838 27666 51407 9066 29667 27787 9056 29819 5608 10937 181 76 99 226 9146 9084 43989 12475 57519 30698 9065 9162 42133 28916 25161 5590 27790 29647 37736 6505 40479 77 10933 34622 29881 0 16
1306 12038 11667 35893 747 9366 47012
1307 47457 23350 4998 8368 1432
1308 39369 10875 39189 42350 28880
1309 7981 7995 23064 31749 27792 7237 30721 33316
1310 22089 13427 4624 30852 42713 3301 22005 65235 25049
1311 7555 38601 1869 7665 11021 11022 26165
1312 1473 43812 395 6905 26058
1313 8676 428 13297 4840 15415 47889 41027 35770
1314 12256 50553 33466 4973 24809 8040 1868 5433 5580 6922 12111
1315 664 44652 5334 7478 1717 1777
1316 28459 11744 28333 7978
1317 32382 7472 35560 40194 40213 59387 75563 29963 59362 35497 40236 40257 35565 40018 84744 35063 35567 40099 50537 91273
1318 11667 44527 24488 21950 28515 31051 1334 11296 5439 1332
1319 13291 13501 23116 6808 21687 23698 23910
1320 12778 37535 6138 15021 17000 5141 3141 1835 33607
1321 47636 55238 53182 33771 24091 75552 9023 32526 14450 34682 36084 31752 33778 42527 74681 32810 6482 22983 36822 36297 10708 23006 32784 31036 22095 32032
1322 44619 3387 4758 74707 35716 3718 34212 6480 31918 8348 35891 10710 28293 6299 7288 1620 26820 24093 7250 8528 42549 31602 10837 11948 12626
1323 29210 23931 44484 10025 75917
1324 405 6793 23021 8322 1551 6928 7978 29986 30490 23114
1325 42658 1924 3990 8295 6916
1326 22692 39689 22647 32063 39846 22677 33453 29159 34216 22721 40990 39943 26688 22779 35058 50472 40067 63585 40170 22809 40169 40199 22872 42222 35450 53017 59372 79362 45263 68697 32404 90882 22991 48 374 17 105 21 1870 10874
1327 53248 24681 21951 15504 14588 15369 1832 21499 16418 4851 36205 3748 23448 25389 17441 5801 3871 4344
1328 9023 59910 40125 38828 88855 29171 73977 48340 32793 10409 105 17
1329 54048 6708 34599 42250 26452 32041 9023 26299 27421 8395 31021 5924 6593 395 26303 8261 2688 23598 5433 6341
1330 30926 35763 30160 1513 19353 36392 5258 12750 21141 32220 8183 11117 26967 56528 36818 21060 21180 12455 37708 20830 34735 6213 26227 12368 32835 32736 27403 932 18798 33698 53437 7894 54178 14782 31748 41005 58709 39781 6501 35372 39969 39995 40114 29184 7961 59387 42365 7963 40125 374 2649 31957 30822 14
1331 12127 149 7826 12122 10985 1894 12132
1332 1121 37506 42110 8526 23011 34116 7212 12121 6554 6911 22237 6943
1333 45841 10095 44729 84184 48065 17593 8652 48874 44290 44675 31328
1334 29526 26651 22071 7737 31233 11635 26888 23065 28260 26709 26481
1335 32011 31716 36215 31354 32067 51400 55288 11176 40241 29184 29967 40203 3999 673 2410 29966 45868 16514 47637 40129 40244 2372 40124 40121 40208 42395 23788 21592 40260 50537 80865 44105 38609 26694 32407 38981 42205 84747 33499 21622 10153 37076 7356 380 24676 35911 24141 379 12462 27357 23970 29735
1336 119 29626 12320 7853 66
1337 27381 30700 26606 849 25346 46521 3539
1338 45806 1323 33683 27637 51200 9294 32668 33412 29921 35721 10609 10353 10675 32876 8 33185 42094 6909 24388 33757 31573 8755 32784 24778 25191 6666 23270
1339 46042 20092 34607 29148 7470 32118 40094 60483 42483 42693 40241 52788 7942 52680 42456 64908 59384 32567 37070 28916 9091 25428 150 12174
1340 63246 79720 1252 12794 12808 10646 10648 10645 10650 76774 10651 21565 10678 27675 28266 21792 28267 42065 27676 27678
1341 946 11823 17306 22490 31710 27400 75942 23618 49832 18519 37698 12372 46811 88898 44079 46555 23643 31718 37420 16757 27828 20979 46846 40335 50474 11821 17798 18243 7919 10662 84919 28186 28644 20030 61609 46977 26136 9441 46847 42104 43773 30959 6928 1554 6877 5622 11744 26059 40959 659
1342 1555 51104 9060 9056
1343 7412 6484 29604 22478 51634 20462 643 102 1372 38426
1344 1013 41773 934 29721 23307 7478 11682 7415 34250 2134 31216 5693 12160 1643 51339 23013 10866 1349 24410 8866 35904
1345 6316 704 5669 8349 24160
1346 21940 6540 6541 40528 36502
1347 30189 186 9422 28656 31315 5413 4936
1348 11527 886 11101 34846 38975 8269 39380 46604 2264 60184 4528 51526 40420 728 1025 409
1349 11122 6254 32110 3022 22587 43136 28636 32636 39430 34741 3599 23554 6181 10396 1204 4713 11815 48310 21348 39348 41903 12845 42691 42715 13001 29950 7917 39715 11833 50195 37426 7951 45867 40099 80865 42260 34399 1792
1350 6927 10759 34070 31126 35500 1496 10071 1363 1427 34287 418 31036 37125 729 5 1916 33163
1351 9525 7563 32131 28773 24992 41561 13693 42768 34916 45926 29234 5434
1352 31587 7503 11635 12026 23697 8526 636 38109 10692 29280 1571
1353 15410 129 3010 40855 8951 11743 34281 30553 23979 1172 277 1649 22310 31876 29182 6889 1220 6637 14822 28531 8930 29281 9326 37505 26938 23957 12987 5409 23514 4070 1215 6895 10314 1621 44921 19068 1687 23636 12948 24724 35717 1866 6155 17 12992 11208 1200 6233 1774 1381 30847 10543 78 29390 12791 12994 1691 6830 8924 8960 18350 26637 6066 12897 15768 44685 37452 1733 13003 33177 8268 27294
1354 29159 39623 33440 36284 38822 40990 11143 39993 39913 35498 91582 7803
1355 721 7982 12029 60135 29429 1632
1356 980 24004 25356 30297 12325 33331 44858 40716 8322 12601 24758 12326 29518 40928 30506 5703 5964 5656 38316 8512 8869 5357 23697 4797 11278 7473 23988
1357 42800 41561 7028 5370 27790 29233 27987 34091
1358 38975 44116 10660 25424 8848 28054 3385 31118
1359 39561 32193 4526 39704 68006 39991 59382
1360 1990 1770 22174 8536 623 1426 29520 50205 14907 5703 678 978 1686 46600
1361 39068 8317 34480 22104 23839 1012 42054 8398 27757 30085 24099 37019 24672
1362 2113 25574 14086 13779 2217 7819 11271 11283
1363 43249 42250 45347 10137 9489 39507 38454 50925 34391 32394 63838 51851 52683 11192 62215 59660 58873 7952 40251 40237 54440 40069 40134 41460 45291
1364 32793 1918 40527 714 7190 23665
1365 35018 21535 35552 40228 42896
1366 36351 166 30537 24901 30535 566 4336
1367 28770 24767 22030 43380 8380 27189 31412 27127
1368 21 12280 7856 44 5371 1006
1369 30698 6487 44655 37534 1615 2697 978 45124 34332 34285 61542 23227 12599 31619 34409 23793 9340 33754 37655 1408 3245 23987 33776 4453 33364 20705 49782 30556 36205 12878 14 18381 35322 7238 4024 2795 89501 29559 388 29520 35005 2048 35583 28693 5159 40345 36991 7479 34829 975 5340 27857
1370 27726 41464 28385 31573 29284 7410 29982 29523 10779 28294 10752 42498
1371 6964 8428 11638 46400 6549 9 1402 41659 1023 36990 8849 418 29413 24169
1372 29284 721 30440 10 67 23670 10940 77 26923 6518 26647 4894 25343
1373 35904 379 33846 24271 24813 31722
1374 50408 73318 38327 66706 56501 38330 90102 91539 91048 61536
1375 47847 6223 42321 34396 48676 5682
1376 48340 13 374 5618 26473 8354 23806 13075
1377 1402 7045 26885 8054 36613 29181 27916 35104 23017 1647 11 12309 1666 31621 46577 7692 26808 37679 32844 21812 21814 8729 30000 21821 5600 166 186 5419 32452 27883 21764 6866 30500 5 29084 33388 7002 191 9512 27473 34919 23011 566 31082 31091
1378 38813 43815 32618 44383 44703 10580 44138 19619 53527 64151 58246 68976 23526 10355 53861 10077 58249 34670 10111 54360 33228 40573 20223 75312 48880 60507 74067 50781 26366 10602 73736 20776 20782 34131 8269 23564 6211 21178 79940 22500 58270 51225 77551 22509 68441 62635 35775 30961 66667 10907 59984 71009 46759 65248 83565 42224 61400 48782 53598 67800 39740 77235 22677 74769 50401 82090 26238 43252 67204 22053 12120 86054 78380 50827 89947 44079 27121 29877 6666 6676 31127 30 9068 52 5435 5 687 5467
1379 53626 7976 6332 2033 6333 41659 10960
1380 51355 43705 85898 57387 22593 75716 36636 54117 72237 42346 58450 60161 17344 17822 55599 62177 55693 57110 57112 53873 33021 50178 68873 58622 53897 73772 65620 90234 54815 60147
1381 37405 13046 35317 23597 38487 50225 12370 54206 29932 15205 14584 32505 23611 30826 6652 913 48403 38898 9382 23618 28645 41865 43984 24822 46785 23619 58316 69715 31173 33495 46075 23637 11837 46235 59087 27068 32529 13817 35056 37412 7374 23640 39926 7919 33723 38915 13025 33496 67910 23643 33964 48605 31717 22809 22771 35185 46652 79422 30218 10396 33596 40272 32090 1372 4692 1169 44614 42718 45174 54442 35064 40281 33660 22879 83587 44609 91540 72639 91285
1382 41353 89 1652 29693 26786 47175 29975 54232 14 3
1383 7716 36275 33636 61144 80613 61181 33793 30232 32837 33795 64149 60294 56419 10290 8616 27883 5392 35637 27885 26786 27791 5437 25433
1384 51264 31687 3361 34671 39720 36702 11164 34773 45189 51526 33709 39687 60426 22852 22850 3199 91123 31344 5751
1385 46650 46850 41629 42218 51301 11868 11861 8332 35205 6543 25318 28854 427 25433
1386 35466 8884 5736 7504 28163
1387 24740 68645 10850 8729 38359 12936 42657 7500 37672 33399 29884 24146 5414 29816 27655 30513 8616 30495 27651 278 39262 5601 27791
1388 27950 24993 31955 31088 36086
1389 24939 14172 27552 14442 34972 21779 38941 6888 17072 81079 23328 205 6918 1924
1390 28909 28906 22278 51342
1391 60637 64908 66332 89697
1392 29877 26082 41474 36006 8626 5471 24856 25297 33659 12036
1393 28030 17177 16659 17364 16930 17381 27247 17076 17513 11054 65829 56854 17584 17782 17631 18014 13111 17858 17627 18307 10513 26103 25101 27272 17740 18234 17824 18499 13132 18677 18735 18585 19017 41713 29069 18606 38507 19090 41318 13842 19374 47831 18501 40843 19793 5825 68860 28878 53930 47954 82049
1394 26433 46308 74517 3022 45346 42168 10674 6268 7896 25510 39682 9007 47422 11610 32058 42479 42419 43402 39936 38780 11852 47697 60426 35090 33628 11162 40231 78151 91385 7968 82012 32408 40959 11198 27727 11996
1395 30341 1962 729 23714 28435
1396 12343 3297 10427 186 10953 26160 33143
1397 394 669 8323 23074 33780 6823 10
1398 52885 39862 28206 42259 18510 21228 19975 46876 80005 509 51244 38573 6991 41280 8899 27711 23891
1399 9404 26588 31232 8251 5724 27211
1400 5849 32561 8206 19687 19112 34806 40943 21141 42587 10616 22290 50346 41482 42589 52141 46299 32686 27180 44119 33454 11592 43042 30493 2426
1401 1460 1655 10432 23138 38431 1444 1801
1402 49203 7025 26183 7042 11637 7213 6993 27086 5933 41 975 8 88 408
1403 37781 2163 4940 24418 7190 12898 12423 275
1404 24354 610 1753 29829 7408
1405 48011 38412 4758 24560 8269 7760 55033 13048 12571 32836 13050 26502 51528 46766 62762 60294 45188 33710 4711 34682 29155 30375 34135 26506 34649 33701 45780 3684 47247 10662 47248 42914 23621 59365 90998 39849 26812 8432 26698 1425 8090 7149 10706 4 29002 51862 10952 1355 21972 34112 3 8855 5767 1383 34450 606 28591 5466 26826 24928
1406 1916 7172 2721 447 43121 310 2371 2276 2629 5095 11441 24726 31785 26300 26303 8847 26556 728 12121 21474 32612 10 52887 6358 28215 11950 1870
1407 33141 37403 10656 11829 25516 44306 32522 39448 33705 16736 33493 33715 10402 35727 24193 34556 39656 8270 23629 33436 33696 10683 39527 33717 45470 33340 35728 39595 35449 39720 35896 35358 10678 86226 12154 17 657 23032 27160 27470 978 7418 22064 93 216 33142 773 647 5970 35112 24
1408 19404 18843 19314 41978 55786 51167 19319 20565 20733 20695 64944
1409 20621 41375 10081 33418 47742 28768 30208 4878 21575 28780 30235 44741 26233 9484 57005 51892 35797 47664 7919 33467 53720 37067 30214 43772 30248 89077 28100 26586 10826 8637
1410 35797 40041 28820 87266 55210 89682
1411 22284 35378 36037 6200 10559 10366 26223 28878 16882 21555 64301 29934 23625 6204 12838 41017 44593 35449 43905 23028 24672 7342
1412 30036 21476 5556 5471 26591
1413 6968 6963 38233 69469 10972 5603 47106 40358 7984 10 29795 29673 562 77837 30500 1069
1414 10793 35206 32297 7222 1364 1104 4956 438 11783 35103 1446 1792 8836
1415 27751 8748 37662 26886 35226 32220 24258
1416 4885 27674 7008 26473 23713 50374
1417 23995 31773 17 5643 23838 34148 22994 967 37077
1418 1448 1273 36780 8863 1675 31064 650 30669 23722
1419 12811 643 7286 967 196 1746 729 1372 29016
1420 12703 18840 10040 18403 50350 33534 7891 7633 29129 9471 21235 39351 27053 33774 30952 6877 30710 22256 11811 1149 7898 21257 36265 28559 1266 10637 46033 34548 32747 35494 1337 23597 23823 35889 48067 31918 10388 57149 11464 1100 23611 1107 20419 11829 28994 15199 26133 36707 9218 12267 6246 23619 43910 76195 8203 35886 39582 35345 27432 8270 9012 32510 23633 12369 29381 30832 13711 10366 20958 1645 46205 4815 29955 30205 36272 15864 34135 5109 39917 9223 45367 37591 33395 57155 30634 36253 9490 73786 40270 42254 34019 34950 50181 20563 34138 83122 30232 30965 11849 5141 347 83672 27072 33485 24082 10710 1916 11675
1421 50197 32388 36890 40069 42362 40269 52585 34139 45866 71102 29963 35497 33641 57160 66937 29954 77232 7232
1422 551 23406 28823 23013
1423 17519 14464 42484 38962 79044 65187 5434
1424 26890 10717 337 5509 8490 5521 5529 14
1425 6217 23479 22214 8374 43283 53053 2000 17180 16228 18382 18448 4415 19061 18840 18985 18759 19169 9951 12355 9933 18813 18145 32562 19446 17541 12113 19524 19949 19308 18037 19707 22264 19069 12359 20664 6238 9481 20435 20487 31054 21392 20078 20932 54855 62143 23604 27350 10669 44844 72008 21575 42606 49828 70320 33126 11662 24767 8020
1426 28460 1008 740 603 5966 9313
1427 54523 47652 20311 28780 62853 60512 42799 52907 91364
1428 35279 2037 27795 6405 8877
1429 41197 6490 33047 23103 41645 58817 26426 32692 45824 61187 90516 26189 10936 32421
1430 8863 12279 6230 7460 11530 32679 38586 41687 4341 8269 7168 26082 11557 47083 4747 5249 55179 40172 32232 29008 5741 32989 10826 28440 374 10748 26179 1502
1431 6478 32794 1266 32838 55548 36724 39834 11633 33980 12288 1962
1432 1024 2733 1183 5115 17384 26639 6514 5428 24194 43817 41267 527 23580 25536 59611 22712 4402 22714 4621 7365 22221 26346 36562 46555 23662 69319 22807 56653 7344 4872 69228 6146 21607 45284 61748 50618 8682 32113 28770 41824
1433 25376 24555 7190 3193 51761 21966 37098
1434 35958 18 38 0 3
1435 48683 28498 24874 24835 21884
1436 3177 27897 30327 8265 14408 19879 17620 6906 23985 43728 12320 23701 27161 28658 32228 40729 3564 39254 24946 621 25041 1688 43805 1355 647 26538 13092 35890 32211 4337 1736 35594 672 5936 29894
1437 14 40729 24852 24785 24854 5687 24853 24850 7720 118 50342 1752 12272 22067
1438 20071 43780 34424 6490 31916 13032 10319 31272 34608 38197 7912 35059 22918 86452 77135 77198 89189
1439 26581 41526 12491 28582 8349
1440 90299 39090 91222 85645 58648 36309
1441 26458 8354 1389 7896 52475 38259
1442 8395 11609 31658 11720 43185 23721 43176 5329
1443 36868 26578 41514 24999 1355
1444 14869 14912 39085 8157 53486 14281 46644 312 14985 15103 14864 15170 15093 15028 7863 10218 51318 14975 6796 60 29373 25407 24167 23134 6828 15 5476 32992 35200 38076 7410 31620 25028 9069 31116 7803 5035
1445 13893 50068 6603 1923 5413
1446 10932 41257 31136 27886 27369 41561
1447 24376 6599 956 954 42758 21939 6514 42047 1871 23885
1448 6451 983 8749 1 36818
1449 33079 45201 6190 35374 1793 33056 3165
1450 1370 24677 5700 5795 6117 35253
1451 656 28420 8732 25045 5203 29516 10693 33330 25361 28319 28457
1452 27741 31217 1133 1720 6585 5461 1648 1617 1693 40761 8837 31062 596 8716 14 1239 22994 12384
1453 34915 53954 5606 9541 30267 11279 186 150 27965 10427 5386 7523
1454 6137 120 48336 967 29410
1455 31898 3038 1359 27151 45795 26828 10708 46600 13
1456 5727 5348 12202 33867 8775 12762 2773 52375 615 5421 644
1457 51862 31895 23238 23874 32235
1458 728 34784 366 105 24831 7803 29637 10 5203 28434 5611 7868 12029 12121 5610 5612 5999 5998 22122 5608 50 42916 44530 641 8780 1924 38
1459 11191 88733 22863 50704 57977 43895 23770 23852 8461 8854 8857 10823 7190 1375 9712
1460 6128 40256 29383 1652 1673 11667 7338 11297 40876 6799 33292 1285 31230 1013 44038 29571 30142 1646 30144 12017 24519 31051 1449 11644 12491 26285 28492 23739 3284 29859
1461 23302 8926 22137 5310 10734 5797 2802 368 24035 9851 9180 36822 31260 9413 7260 558 7375 2164 29883 26645 21988 6076 5414 5367 8358 7481 11663
1462 10344 11147 39631 4528 38822 40131 33634
1463 36004 41418 42608 3756 27868 32255 33833 413 8295
1464 38951 613 7152 7167 10025 5967 1200 1094 30034 1364 27150
1465 39283 63874 39277 22186 11454 2364 21601 32390 26688 65466 40078 43802 12093 32399 32403 8893
1466 2449 325 12837 26119 46763
1467 429 687 2090 10794 215 49
1468 35914 388 11919 6448 16317 409 10826 673 671 12320 659 5476 66
1469 6533 5471 36494 21476 7720 42342 8319 7786 28910 23961 10441 11662 8340 8399 5985 1647 29516 31013 25383 40526 7243 28370 417 6526 35531 28255 8332 8745 7770 30895 5945 23072 35937 1565
1470 8913 6048 12544 25464 38985 27872 27874 11986 24424 15145 2673 6984 38888 42903 8821 29051 2749 10041 15546 26834 11307 28911 11922 34448 37076 29843 26823 29854 34704 34705 7986 27075 1490 35891 24099 43986 11717 613 36959 975 24353 427 1409 551 7209 32024 5966 1751
1471 1137 5563 9174 2733 48850
1472 48225 7534 1534 5978 21486
1473 29700 9037 28812 28810 21183
1474 1676 18312 34198 47216 43765 6214 19304 12947 5461 6266 6851 13056 6262 11591 6530 8391 49025 9009 6406 29835 6646 32381 33721 11887 6399 6387 32860 44719 23179 7504 25039 8534 4589 23027 72015 1764 2376 28644 42210 73580 33419 32530 4851 15333
1475 9484 30202 46069 42718 8755
1476 18306 4737 11548 3078 9752
1477 6815 27554 11296 1440 1791 43195 1006 28427 26748 12479
1478 27917 6534 21476 10159 23049 9645
1479 35096 11431 11443 24498 3623 3705 13121 23472
1480 34441 1005 1400 21470
1481 4746 27010 22478 7469 22621 32773 57895 10927 26802 22359 33292 32964 23838 23711 21786 33072 10924 33012 30721 26787 662 1427 1997
1482 24806 31510 25426 31514 24742 4811
1483 2997 46977 1056 1154 16322 5123 3237 5161 3740 40378 30799 5208 12570 10146 8315 5475
1484 43409 8876 3027 3796 25009 28901 33210 26807 4681 42981 7374 28969 22258 37015 3730 30051 35132 31050 1441 33265 45579 47034 23838
1485 24965 29638 29257 35934 8659 41236 3106 41779 21483 45557 41780 34078 31955 9058
1486 36567 7891 6267 36395 40587 35797 2970 65809 52463 53720 28882 23701 41586
1487 13085 175 167 136 22321 22965 12485
1488 62298 64149 2653 77419 44104 31950 25144
1489 27152 38569 114 5622 11936
1490 13570 9118 7576 13971 38610
1491 12029 10932 483 291 729 5381 1868 1539 10940
1492 50564 39459 37932 6235 11844 26261 51526 40087 57288 53355 37528 41824 38857 6022 36512 23706 9790 11888 29750
1493 5434 29239 6949 208 21770
1494 37573 23764 37570 6927 25392 10832 28255
1495 27875 7210 10698 12767
1496 13 5822 10851 13570 25251 10273 29989 25236
1497 409 28658 6645 34268 12320 31554 26588 32228
1498 52664 22676 39893 33720 33462 40058 35058 37419 40174 55179 22872 39944 59356 80865 40168 59375 33151 42260 62416 77232 7970 51677 40986 38209 40030
1499 8836 28127 34453 37614 26475 42987 6811 8852 35197
1500 91285 12494 35101 22997 21476 7720 29877 1363 24837 5953 10971 6590
1501 18049 5171 22965 9467 15827 18388 31721 23597 21270 23641 961 29665 24149 36206 23305 6592
1502 22990 28216 36114 5821
1503 6192 33722 11168 39896 32012 37424 36737 33462 62102 40018 11161 39738 27301 22885 54457 50476 40236 59354 11858 48986 2045 35450 40232 77460 79068 37419 70515 32409 90115 1548 1799 34404 2177 25410 1104 21650 24006 24858 5771 21657 8320 5329 41560 5925 33743 8836 23789 6104 6105 30317 24731 29100 28267 4781 35891 42399 11963 11964 34402
1504 2271 33820 26745 27445 8326
1505 39803 39983 11605 48345 39865 32065 37917 39852 35496 39997 39655 56311 40171 53504 45297 38979 57973 38329 79950 82488 29969 42261 82012 40040 43461 11181 38331 45566
1506 2762 46163 47889 28421 26704
1507 38 30145 28283 28591 30440
1508 73505 33832 24208 38832 24710 26477 32415 26481 37614 43082 42986 35582 42264 30816 44123 8298 22002 26758
1509 10723 29944 35992 35559 45293 45803 22053 35566 12187 10867 1499
1510 23628 46766 25154 40728 32619 29952 43311 39693 39599 12261 2531 38199 11848 33720 43251 22726 34613 67281 39992 60521 32388 61185 38828 70540 91378 82045 8272 85291 85505 120 35709 24260 42267 31284 22988 35500 1924 7726 26786 1380 32995 29386 1796 22986
1511 40776 1270 41361 30303 41165 4761 25119 20330 7468 42173 13023 30710 51637 12362 46289 6176 12735 12837 26147 32081 40653 22286 7093 55238 12842 23099 10039 64257 30793 39316 27063 22299 28878 11564 52644 22302 25376 22517 49151 42321 38887 55170 26466 22621 81906 10361 39352 10679 22646 32090 46880 40788 22591 7470 11625 36561 38326 35058 23640 60356 51659 46774 28880 61524 22809 46871 31719 22872 42020 32397 76775 91539 7410 23989 5615 1006
1512 33715 50480 26506 35954 26765
1513 71617 21077 48466 32590 18686 43769 70388 65581 10886 4543 59428 10910 82855 55852 81196 75314 80988 27247 34426 542 10908 50478 76925 66294 83601 37067 59364 9781 60424 75278 39090 8283 40909 33796 34230 34248 24936 7002 9049 40988 12211 12212 6951
1514 379 34022 21610 6544 679 31391 72 43609 40524 974 34909
1515 29696 29699 13354 34228 29257 13200 13355 13295 13171 8649 34304 3107 57872 34231 13351 29259 7522 48560 27982 31086 29692 43497 27925 512 13704 13757 14267 9713 49080
1516 25752 52702 3529 41320 26374 41431 71107
1517 37510 87339 45780 14 1402
1518 114 6498 373 13 621 119 24247 6927
1519 13700 22036 30527 27655 24158 9306 23305
1520 37627 26961 41555 34016 23113 17
1521 45612 32915 45997 32024 11639
1522 14 30702 45937 37995 20230 19769
1523 30593 1506 44151 12256 26846
1524 32460 13693 25132 25266 29642 21772 36100 38590 34078 8663 31079 9156 47108 31076
1525 5110 5857 27007 29426 20717 32570 47760 32375 6807 2953 4938
1526 39170 31921 39366 76388 32012 40188 52680 43042 4811
1527 77640 25287 7569 29745 7551 32903 34091
1528 39938 39847 40033 11170 11847 34019 11856 39715 26688 38822 50472 52585 47113 38980 33636 37486 80906 11172 42362 42015 47823 40235 66716 59356 8271 40169 37421 51851 40069 53978 42259 42223 78750 39866 29741 57981 89260 47250 59355 57985 26696 87462 82158 89246 91584 40031 9188 1046 23057
1529 1595 2427 1954 2779 13 29719 8424
1530 10826 21476 7720 5926 7485 32217 22987 1435 7856
1531 11483 11514 8269 23585 32238 10706 29014
1532 24260 114 373 29366 8278 10826 6793 24811 5725 5101 33950 6612 196 10867 17252 11279 987 34155 26720 12398 6623 33814 5370 5433 12485
1533 34113 7514 5392 409 26638 7409 721 76 6827 86 31605 118 6506
1534 6060 11784 33811 27041 7288 34005 7241 4834
1535 963 16749 12977 23265 23288
1536 38823 10662 39954 32093 40305 23643 40101 38914 59354 40212 59357 46569 37191 26693 56419 33116 50652 77460 657 7415 42753 6523 393 395 8855 34565 48314 1062
1537 34602 39408 10383 33430 938 28639 12257 13056 32836 30977 6246 45314 36270 32421 37486 61227 30550 35895 29949 27065 22539 33001 44337 13178 34552 22573 39539 11826 6260 28788 10679 33698 35889 46785 32522 10392 39316 29934 32089 23615 21649 32422 41174 669 37513 33493 51611 36700 26194 46880 24645 11167 33705 39709 46766 38326 11532 33248 30213 21139 22699 8210 7924 17439 23593 11782 27278 31276 29953 32530 12372 23640 39782 68009 22766 3537 51651 55032 46205 33340 11848 35870 47587 39940 1257 35805 27720 35800 39954 40033 55910 35059 35819 34613 33793 46564 7971 33469 30299 57155 35841 7946 37449 12947 40984 33463 37537 42456 38824 53506 11869 84745 3102 13025 52349 23626 7937 33499 10637
1538 60696 73583 60719 52850 52863 47320 57060 38753 53839 80783
1539 40870 3191 28463 36514 23133 31785 23600 10843 2254 42708 24642
1540 46435 59717 51157 62078 63202 53004 53007 59447
1541 5111 42212 6890 49094 12689 10382 683 13046 35869 32506 5460 5404 1603
1542 62076 62080 62075 52755 51822 57638 35339 56005 70428 89937
1543 395 24417 7989 80542 12266 6628 1611 34443 615 4 28357 10769 5446
1544 3322 54251 35862 10504
1545 34680 24643 5262 45313 7850
1546 8437 377 1791 691 26718 669 527 8489
1547 12767 24518 38982 33976 1435 26473
1548 50128 70014 56102 56191 50450 8848
1549 25083 46224 419 60100 52463
1550 27794 1970 34064 615 28657 23159 4811 30999 483 21526 6381 6553 5404 5434
1551 29840 23385 136 28594 3990 12992 1787 1463 7505 12258 11592 7161 13068 27683
1552 12127 12126 11218 12123 10976 25544 10985 11295 11214 29261
1553 12171 31284 27553 61580 975
1554 48347 60521 55594 66716 42523 42259 72095 70541 62298 83537 393 29219 14 35393 1921
1555 28897 6036 1293 32812 27874
1556 32940 40293 37499 21470 6310 1916
1557 40260 42456 7961 47773 33494 90615 72016 88338 89246 80054 973 104 978 43 1346 5597 33166 12017 12777 10796 38
1558 41880 29460 29457 31186 31189 32572 13150 37983 12806 34538 24199 35547 12897 18226 33721 29742 36870 8351 7189 8854
1559 34274 14052 0 13917 23271 7301 35942 14588 7344 52136 40129 76919
1560 5643 7408 31930 5445 5406
1561 12760 28440 30662 46614 5267
1562 30549 36827 6246 6895 39066 42442 19020 12367 7898 7891 13656 34199 10693 10962 1571 38482 24193 32522 73865 29381 34135 10388 9353 26942 7950
1563 402 6585 47143 7430 26720 32893
1564 29833 41336 24153 11982 1707
1565 12873 4807 24587 6585 6006 25425 5725 38164 4902
1566 63923 17709 33505 21178 13048 57867 51235 33485 42668
1567 10824 76082 38169 9191 23944 31511 90755 19544
1568 23255 8309 29034 10711 12544 12081
1569 9174 23863 6397 44183 5128 3052 6618 36827 41526
1570 1355 5653 7482 30524 620 5606 21649 12270 388 30530 29795 7985
1571 27866 27658 12045 8092 29883 6554 28497 5277 728 10707 8292 33368 21681 634 31183 24820 8526
1572 12119 149 12127 12126 9977 11218 10975 10980 11220 11271 10976 7793 10985
1573 21535 40728 33710 31241 8428 427 23015 729
1574 11103 14589 34542 20954 40121 45864 16391
1575 20712 10617 39336 7908 32378 34594 44779 88243 1863
1576 22886 49159 42365 10759
1577 10 25029 33916 7803 25299 1063 8101 7243 1868 6566
1578 11586 5670 11303 1643 1273 1635 43 1077
1579 11303 5782 26708 35639 23804 1969 1104 43777
1580 40822 49634 44108 30216 38216 27353 37395 51216 39367 26203 39459 57929 52653 39616 46177
1581 24426 24461 38986 1927 12026 6392 1435 26473 8848
1582 37779 638 24140 23957 1680 1657 8465 34329 25052 28885 5471 12774 78 1785 33123 25024 7727 32500 65 24735 45489 33133 36601 38424 23002 36323 1215 1362 958 160 38269 36900 11670 1670 23047 42170 34904 36612 33052 5684 7786 366 24039 31036 7783 8404 25355 29281 34823 34616 7993 12036 8349 40340 23424
1583 22027 24150 8089 7871 1269 7870
1584 10984 11266 7815 12127 12132
1585 18687 19317 42567 41432 37118 21187 13032 28995 35500 86 27522 31925 27531 28916 29269 24171 5590 7186 77 6505 1868 25343
1586 12808 5949 8885 215 43 5101 26880
1587 6465 25360 40696 23745 7224 28875 31286 32885 37023 1373 47105 21796
1588 22161 23608 32987 12734 41221 11821 42691 43573 38449 31276 39042 39832 34683 40677 39987 955 41538 23833
1589 42363 394 10850 54232 5405 8781
1590 46028 48 10411 25042 26769 30745 31913 1775 8855 1485 28330 1713 1397 1443 11302 11988 23181 5699 32436 11297 6315 1671
1591 1788 7505 7856 23406 73 62 22025 3075 30440
1592 4534 45802 10165 47160 9341 23190 33020 33916
1593 23329 42703 22621 63999 55088 5605 7024 28162
1594 7866 5837 8705 7990 27470 24758 7867 28303
1595 57910 12430 14859 24285 5183 43502 5704 10744 12525 546 12742 21650 5708 2278 36676 24290 7771 12852 22115 11776 12854 41352 3586 39324 18614 44668 12864 57392 23076 24865 2162 12889 8128 12903 4798 12928 36958 32564 28154 40587 932 835 12988 37080 39465 11147 30055 43195 3683 36998 34611 7894 1337 30646 39657 12400 40870 27423 29804 33453 48426 36003 24863 23006 33463 37362 37418 39916 9279 220 37425 29805 24800 7087 1485 36736 1256 44373 35907 29807 52000 35497 673 1863 43266 5653 37487 2418 42365 23374 396 28971 32798 11315 27443 31218 32210 32940 5679 24555 27037 28928 24744 23715 37435 11783 729 2352 6310
1596 29306 35719 26726 27741 24739
1597 20888 12256 38017 41170 30993 48537
1598 8910 24547 24612 12115 6501 26505
1599 29618 23698 29978 7770 58689 1006 5982 5985
1600 7502 7269 31618 5288 11346 551 11675
1601 5428 10826 21509 27675 6289 23424
1602 32061 7896 39671 39849 39850 42254 39624 38201 60258 40078 59723 40174 40165 51299 38979 80004 7382 650
1603 5397 23208 43406 33809 38791
1604 973 68 35500 5729 8341 38 5397
1605 37001 1070 1479 24157 36960
1606 716 6521 6536 21940 10872 29793 394 8349
1607 19539 21497 4947 1 19684 11113 63979 21139 31754 8766 2842 6906 30440
1608 26886 278 5414 566 25150
1609 20072 30184 30186 15394 10127 7971 30218
1610 41263 35634 4384 4133 41196 3602
1611 6011 31542 31546 45016 31518 6522
1612 60888 29192 32012 39848 37361 47635 36736 55594 88457 38331
1613 35517 19050 31481 63266 31480 31487 25535 23751 23783 33414
1614 50779 30002 23802 24788 23023 24434 23715
1615 23843 41345 5308 1076 8835 1911 12481 7208 23830
1616 39889 39751 36584 42118 83534 76415 66937 31166 44708 52618 67255 57773 42914 35570 50652 28644 47941 37698 40828 80585 35577
1617 28027 34687 16578 37051 27362 34088
1618 964 24905 11732 5469 17252 6978 24011 21891 8730 5404 27830 24947 12334 41856 22990 4948 8051 29366 8773 12376 23021 4900 24778 47415 7024 27642 2773 26071 12382 28290 6696 31295 8278 26537 3464 1603 5370 26539 5580 6697 4884 5442 7021 30276
1619 7446 9208 12565 17 23025 45192 1252 8935
1620 22272 32755 34610 37513 43910 6243 12850 15863 12369 39595 10397 32526 23631 39725 30200 31276 32528 35052 23637 21600 5077 9432 29926 23641 22127 31178 33020 23643 39992 33467 7950 35563 41786 35686 30219 30218 35564 43155 44469 33479 33488 42914 1154 30239 30248 18050 35574 5405 38398 31753 7979 21894 1603 1428 28255 32858 23210 81218 23212 570
1621 419 8036 3073 41582
1622 21697 415 1688 24250 4783 8676 5628 21687 9657 8621 8624 8625 10623 13 28766 9679 27208
1623 6487 26825 43857 36498 6125 34557
1624 9810 13767 150 23674 5622 35463 8357 21506
1625 8869 8870 12871 34478 12873 684 5425
1626 35204 24006 8354 29552
1627 47630 51288 45285 59723 40098 40169 55462 53676 62545 42796 40134 80004 42260 37369
1628 7774 8750 1690 975 6735
1629 5113 5182 23814 8033 11982 4494 35580 664 32187 7749 23600 7768
1630 41530 12063 34120 29008
1631 38248 43179 26876 46219 43259 939 22611 22612 44066 36559 39413 50561 44488 11151 22786 22778 38328 30646 22820 50640 12371 86658 53882 68776 46572 22771 59876 29328 88212 27312 65398 3948 397 43180 72638 89423 81865 32405 22512 31423 69483 51081 22943 48548 27768 76389 22940 22942 80261 22720 41528 12030 28216 5113 978 12493 994 28408 26703 4956 24219 27170 7975 705 56324 4915 1647 670 114 738 28063 24505
1632 7264 6060 25016 13059 28125
1633 48001 49952 83541 932 49991 75880 10386 34850 38479 50003 50005 47952 72001 4045 60360 45803 26471 59660 81369 82577 81370 42456 87505 72404
1634 4773 4811 9330 28165 31929 41287
1635 42782 33808 7272 171 6859 6933 3 7243
1636 26282 8838 6828 5725 26656 23147 24350 8323 13493 5438 5101 23117 659
1637 33498 22938 35571 35574 32840 12154 22088 27108 12380 22317 36996 28431 23029 23711 1042 23032 29975 48232 26812 28160
1638 7915 25410 23406 25448 5449 373 114 24153 24943 5599 5725 1379 38499 24121 6311 6330 23889 151 78 374 8803 13 32356 32355 5757
1639 36128 18615 33773 7388 19330 23514 6364 18819 12066 23540 20447 6163 28628 6168 34587 13015 32666 22005 42318 6223 8421 6897 3300 40826 33775 11811 36710 39910 11843 29946 17 120 31928 118 5466 38113 967 7228 11661 7995 670 12486 7212 7406 1106 678 13059 1647 10843 23692 1924 8428 56 31005 1090 35942 5643 1870 5326
1640 30993 23611 23306 22022 43910 21822 8190 23618 26233 23312 8374 8154 33441 16360 13821 30201 40491 27068 8781 30200 23331 31173 7891 9595 32967 7064 9725 21600 7739 30465 9434 23637 9479 8657 8627 32766 20987 22270 26238 23643 31178 25388 30206 13025 14863 71162 44924 26239 35185 74676 7947 9639 35563 33467 12352 9433 12414 12372 23313 52058 7950 40119 43772 40348 33793 66470 44202 81078 66439 53721 73060 6686 38916 66471 30248 9484 12850 72639 35451 56661 28880 987 6731 58401 23655 566 191
1641 954 5400 8112 5344 25219
1642 7243 23704 402 32355 5757 32356 5927
1643 33134 12471 28301 36396
1644 34601 53629 20650 33871 33886 61224
1645 31216 658 35646 7503 649 8437 33131 8404 10146 43439 26593 27026
1646 26589 40701 7446 27041 29544 36827 44304 38193
1647 68276 84127 89000 63596 72502 53156
1648 38111 27281 5412 994 684 11928 11927 31130 26593 33195 621 23134 24946 6731 551 9317 24484 1427 8526 12768 7721
1649 7422 23985 1124 39254 8381 1383
1650 1049 21897 69476 27783 22991
1651 373 29892 5964 33829 32953 36004
1652 30527 13541 8066 21584 6638 29268 6733 6641 30507 7431 382 6292 29656 6655 9650 13687 13692 35637 171 21840 13707 30495 6671 6874 8502 4892 5987 13756 5643 23367 27885 6644 6137 9677 7471 13818 4976 33406 39267 14250 27655 6687 30272 30273 6705 587 23354 6686 626 6708 14106
1653 11269 6442 6432 11214 7798 149 12126
1654 23137 1503 42709 6854 54892 6750 8778 5418 12436 23874 27740 29269 25297 11688
1655 58069 33488 32837 12369 978 41883 6589 24778 27661
1656 42525 4892 39866 35061 7492 26213 29034 64149 57981 47640 90882 50538 89696 43803 393
1657 16545 31507 43448 37660 6321 24728 21501
1658 1580 10932 4990 44901 233 18502 64864
1659 9221 9223 32304 37107 8140
1660 33775 36876 46549 31057 21949 35977 47879 37414 40712 24643 89501 26781
1661 2797 3545 4213 679
1662 35608 10308 10063 51460 1916
1663 23807 393 31553 12206 25407 621 670 49 3493 6682 17 8779 10861 6561 728 7990 8033 36360
1664 53359 58876 48347 40215 54455 78750 49159 49162 2476
1665 35447 32059 39898 28930 38421 39687 39113 949 46448 42896 37428 42259 36581 57783 11862 54458 38330 39948 43265
1666 1667 1373 1711 1453 8842 1753 1643 12166 11901 1034 1632 8837 8437 1792 6030 1642 24354 29025 29840 1693
1667 21149 4757 34213 31058 21302 21063 25521 6216 6197 4737 41132 12650 5888 37929 69463 32071 33465 13085 30356
1668 8465 7502 24138 4834 23777 638 35647 7129 23834
1669 4936 77 43798 1269 6859 10462
1670 33239 2130 27296 33721 46220 11 9404 32381 5505 6124 34476 62409 62415 388 394 1748 7856 23880 27213
1671 6582 391 1423 26577 8532
1672 13118 11796 7897 3918 4718 8994
1673 22566 22611 22625 49917 22612 34387 2203 50183 45295 54897 24400 22646 25157 26985 37364 37365 82181 57980 35974
1674 8703 36345 8646 30505 1491 27481 5384 29421 47176 12429 6696 72985 6556 7702 39076 8593 291 1884 106 37348
1675 1733 648 1008 26697 10240 1713 1432 1332 5445 23975
1676 54027 29959 54458 9749 33489 63684 40191 57290 9897 11179 11187 59370 59364 54461 10912 39868 53554 40225 29961 57982 39725 40022 34950 37410 37930 25158 50481 40037 39817 40227 39795 39934 40197 73496 40105 26690 44467 39920 43458 39970 39923 43265 57985 27421 39730 39731 40232 37419 57291 40046 39792 76419 71568 85160 37197 83115 87316 76437 85500 85278 75975 62121 89781 77460 70554 64084 43168 71276 43460 25159 40217 53517 84555
1677 22055 26239 43252 49 2923 10409
1678 32184 1791 22030 33166 28330 2571 11202 42923 5199 7505 1374 12291 23105
1679 390 11872 5637 27728 1013
1680 61823 36448 44763 29132 62510 46986 45822 49138 27327 27328 7782
1681 25030 31425 7746 2744 28468 1584 33043 27554 39124 41610 34842 9911 22380 5964 3225 30152 1185 11797 17619 44355 42063 34419 9961 28682 26670 841 51662 3968 2684 4802 991 4412 24559 21647
1682 64180 88281 23029 31319 27833 41994 106
1683 8997 13019 26791 10286 22118 9318
1684 35113 12436 7783 5469 26576 37552 6528 6381 956 11 10160 26651 5237 656 37003 5362 37504 975 10692 5946 1792 5654 8319 7720 28828 12165 1485 8444 27080 7040 32957 35074 33001 24013 36610 12438 30739 33145 31004 26590 3301 21604 27917 24815 35142 24778 5988 42052 25052 28431 4550 7721 30034 8322 34819
1685 1042 9324 31061 7850 1059 8478 24085 5342 41345 1916 1046
1686 5583 27902 27910 1083 29280 12348
1687 50768 21257 20581 4465 36734 23100 38479 42557 65141 23212
1688 6313 5655 6538 38431 7220
1689 3376 1576 43036 36384 45021 45020
1690 1031 38 5643 36995 56
1691 23017 7274 674 33758 634 29584 42663 5782
1692 86 26524 563 27099 104 8509
1693 696 700 5964 380 10409 11936 3920 27125
1694 31415 34269 31377 6102 45650
1695 604 29281 12494 38587 22995 48 5466 26879 43733 22379 12334 1063 6076 7995 5984 31929 28217 7865 22963 739 5450 22066 103 25311
1696 35564 69313 78217 66058 35569 83532 22938 55109 29970 55004 44105 46075 39794 86819 53796 54442
1697 13482 8115 1602 13468 8066 9607
1698 25437 23030 6521 6522 11936
1699 32522 77077 14872 6523 58077
1700 33705 22023 11175 39586 35728 11157 10681 63173 33711 39912 39867 34777 39132 36312 36534 49105 33723 41786 39959 78293 40111 35257 39736 46205 38393 35061 44467 51767 4111 57156 69102 35567 33505 46089 61599 88281 7966 89480 43465 10181 6946 8095 12467 7 49 382 969 23691 25161 23670 21815 34090
1701 13150 33438 21546 41552 29926 27340 41895 39703 22777 40252 56419 91293 12427 41203 24289
1702 55461 26261 52788 24800 50650 29967 61183 78263 38573
1703 46567 26888 8432 33812 43338 6327 32481
1704 26713 26766 12169 23986 31350 31635 33564 6785 4770 22610
1705 12171 1109 22313 23675 1662 23969 1084 145 28133 1065 1207 1372 29436 5652 12184 24076 315 10477 30683 2721
1706 9813 5629 9843 9868
1707 39384 45188 44100 39170 11145 3205 22695 9007 50469 21597 35350 2203 3548 42252 39703 39853 75255 7932 3658 3657 40297 40070 8271 37416 40227 83452
1708 35941 6226 6340 24235 48478 28200 48707 44989 45759 39578 24668 47801 52411 11162 7922 50770 47697 73786 77232 89189 90341
1709 58254 63500 49704 40921 62003 51204 53528 66072 21172 51213 41720 27341 43559 21145 49708 37172 43508
1710 6155 23562 22515 6267 31494 39336 40108
1711 8835 26479 45177 7986 6387 5182 8311
1712 23498 32914 36214 53641 41017 39644 74707 22872 22918 6349 29195 42222 40681 42796 84802 23778 7292 10830
1713 31556 23909 11974 5438 11 527
1714 10710 8322 24673 50298
1715 1555 29366 21890 596 12275 6514 6665 5654 1563
1716 8781 24811 8737 32957 29304 31517 31518 8322
1717 32985 42438 42786 34653 26871 3561 40728 40169 36047 26183
1718 36079 563 12382 7803 24721 708 21484 7985
1719 33916 39122 25045 1576 29781 32554 25449 6906 387 27356 2166 13723
1720 8721 8144 12077 12450 56235 31642 8432 5466 383
1721 9547 35789 35787 35790 29945
1722 31312 22056 22064 46594 9056 1352 6413 28924 6414 32131 7500 9051 130 41279 46322 226 27358 24209 11639 12303 118 7540 7 12310 27884 8773 27115 956 954 194 7829 44195 40745 7478 7192 68 212 7028 21737 8619 9028 31093 99 30286 7834 8 27647 10937
1723 40491 12213 23143 11682 55 12294
1724 39437 46880 37914 33419 47578 36810 39820 39994 39996 40035 39790 39944 43466 32403 5719 7486 46521 66 28445 6801 24233 7506 32158 26521 28259 10875 40362 30632 11202 1970 654 29879 7208 978 27033 139 64756 35940 11208
1725 1047 1387 5678 1083 26742 1502 36004 11929 1792 32232 7177 5261 41418 8828 8445 12266 34439
1726 21973 23255 46528 13054 635 7711 8270 22046 7202 8256 429 27800 30440 7189 7833 440 23 1752 24212
1727 26846 1407 2732 29618 23773 11962 32237
1728 56928 52398 55677 69992 78995
1729 136 7417 618 5987 7196 62091 4886 23673 35707 211
1730 50466 513 24915 18592 24471 10177 41250 11079 24116 33530 26860 34711 11102 6490 78 6889 10356 33813 42607 22477 22496 35722 41625 50030 48742 32203 33339 27423 39985 37563
1731 6637 6581 30738 117 12929 8749 23269 22065 40338 6528 25219 7021 23270 12276
1732 44075 65102 43317 32758 13382 52547 83035 26238 67556 67555 73593 39263 27670 8278 30499 35669 5607 6665 5380 1555 9057 5370 291 566 7870 8037 38595
1733 886 7904 11552 10363 30037 12226
1734 11784 2688 7504 12505 4795
1735 8461 10704 27554 40422 1767 33930 10838 33306 5337 1368 26589 45795 8854 36565
1736 1591 6779 5469 36991 2757 5988 5077 15999 1095 2826 5123 47143 45353 12944 26790 23817 5113 8052 32489 2379 6646 17642 9443
1737 5113 13 7480 25055 33291 29367 11885 32777 11315 26105 26593 31977 1097 46808 36816 1092 10707 9645 5772 24488 12493
1738 1602 6620 13659 8795 56 21 24948 8070 7726 48 29371 6909 149
1739 31519 1031 171 14177 7476
1740 8183 31516 6541 28942 30140 31527 28941
1741 73 42047 12861 23 7793
1742 45976 48496 68605 83748
1743 8154 46954 22957 310 6763 14773 91 22998
1744 3075 42264 5151 12775 27085 640 26564 28453 12657
1745 31649 7728 23173 12312 1180 29344 27025 23051 31930 8004
1746 44178 38440 69319 73037 6249 11809 53330 4876 12714 36643 31456
1747 38104 26292 6467 25377 12360 25376 52636 25384
1748 84655 5593 4402 45284 1539 75767 72539 17901 29960 42259 28248 33482 78897 43531 70540 32407 62489 36815 21899
1749 43 10947 22064 7984 33 14 188 38 388 684 6856 86 68 6916 39073 6560 11200 10818
1750 8798 16566 16739 15051 412 3237 16129 16558 34922 17530 58078 17060 2539 9775 3494 16987 3066 8183 15339 34633 8960 5114 17923 36342 25095 17927 3685 4977 3275 69 17180 17496 14975 17449 33208 15979 163 5168 16918 17540 4059 15843 26112 3272 16240 12804 3573 16298 15697 3634 4242 26101 48738 5184 55782 16521 3669 18866 10508 8674 41685 4457 5208 18858 40346 31090 18873 19110 51981 17845 8822 18231 118 19002 17000 5058 16464 5171 5258 51991 5138 82388 2360 3813 12356 25106 26116 12423 19539 14388 7866 21903 20449 12808 16785 23136 6763 23536 30268 3574 20574 13420 20109 25118 20346 45194 18728 26092 51917 22082 20721 6890 23579 19834 40581 20888 26126 62206 50417 21164 388
1751 23964 32940 1428 79 1711
1752 23430 23435 31619 27917 22083 23441 23446 2380 45015 14744 45016 14859 45017 15038 42147 2690 15512 42401 39066 16131 46030 6522
1753 1553 959 382 956 954
1754 39232 32399 8499 47881 59384 42914 55989 26483 1745 5678 29735 12760 31774 5657 656 684 24379 27135 24480 24454 6525 21786 6528 7246 35940 8896 12027 7735 21662 10826 1795 1698 3706 10971 26652 8338 9382 45585 26649 8317 10705 30675 988 42024 3385 1352 31118 33557 30286
1755 22220 12809 4439 37454 29907 30752 9266 32724 9006 29934 11846 36810 40990 59441 38980 60521 32401 91123
1756 55218 35686 87198 7915 5771
1757 33944 29702 6319 3378 38920
1758 149 7410 12470 7819 40531 9068 20735 7803 31835 41561 10932 7874 111 7186 7870 191 10934 10985 0 35924 32130
1759 3640 85 19183 34200 9300 5277 31156 10388 23926 24669 7971 47638 50713 62214 39081 134 5607 5405 10
1760 4273 21969 40990 25388
1761 31000 5405 9055 30504 5414 23154
1762 27077 27079 26747 3301 26725
1763 23920 4289 52576 40393 42752 22473 42473 39277 39286 7889 1302 39279 39304 78012 6821 21215 50372 29219 28053 5608 26473 26474
1764 53625 56285 42781 84911 44155 5921 6548 27430 56659 48804
1765 41625 55064 42256 34763 52361 32203 13144 42067 34724 23935 44321 26458 16 8774
1766 16661 8225 62875 23674 80885 56453 84774
1767 8647 39080 6313 1550 33913
1768 527 14582 71254 52405 41942 729 28831
1769 42283 836 23486 31431 8213 18049 29462 32441 18614 23513 10582 31442 26571 36525 7103 13003 19417 22252 19338 39272 12641 30910 24626 43781 898 19932 37470 26148 20975 6189 9003 24649 33240 35876 36270 37405 1333 3389 12256 11824 43172 40021 42365 24859 23799 31323 23235 10182 25314 28380 25318
1770 1264 14861 14806 7329 48850 22487 29850 35204 35586 22996 34082 31412 1550 41540
1771 17588 15517 445 18445 16151 61411 71268
1772 32380 54898 45325 11145 11147 32740 39587 26687 39520 43811 2203 39653 35360 7470 39789 39878 83926 36701 39816 37416 45475 43455 35561 22677 11187 40213 51295 37419 29184 62217 40025 82944 35568 36896 88813 47140 86819 27720 44156 87070 84355
1773 1793 29628 29897 28975 5182 5449
1774 2644 33296 2815 63585 48
1775 14237 14443 14118 23685 14773 14518 15160
1776 38040 21915 36801 29227 36350 382
1777 390 5709 687 23156 27084 11888 30585 1074 29891 1242 5198 25410 12591 24142
1778 11465 3648 19068 31226 4744 17589 31039 42050 3991 38272 30684 32797 33702 30179 1705 9782 27148 12320
1779 3600 29148 34611 32008 40420 56640 37410 33460 70539 36896
1780 44133 12026 646 38982 7725 10147 10162 6527 24393 34208 5453 7999 7850 27880 10148 34209 639 5267 28886 22967 11887 29884 27436 12758 23033 30736 24083 647 38462 978 35642 26746 34566 33178 1010 34567 6076 40532 22072 1658 6030 27435
1781 42718 88212 45581 74916 90668 6554 728 8292
1782 7716 28880 12372 1024 29946 44443 25293 5370
1783 11893 26227 427 769 31360
1784 8523 33812 7630 6881 12897 171 10791 6517 7417 8101 21638 14985 7443 220 7442 6830 5063 1140 33671 3955 12840 27072
1785 5784 27262 33385 10132 32209 8013
1786 11532 35547 69233 50767 33702 32697 39661 29153 39229 10674 27549 11611 46621 41650 31178 21601 10389 38200 39850 39995 45295 38979 33461 11521 37363 79 42016 7971 75597 41557 66737 43531 91581 35717 1746 35212 8998 33793 12592 7221
1787 9341 35891 2754 1387
1788 32760 12373 24798 42203 12710 44105 48340
1789 6281 39189 25121 8231 391
1790 5648 1653 29383 1424 35417 6076 38276 35812 653 30721 555
1791 23002 17 11 25022 8896 1870
1792 11721 35069 21615 1911 23789 30356
1793 7482 12487 379 10864 1438 382 1612 1466 5934 11756 2047 23805 2177
1794 6538 35385 45098 7495 33158 1611 11628 7288 5946 7785 33921 4554 35512 21647
1795 38617 14836 15510 48384
1796 31652 8537 24788 426 8439 15062 25139 415 8539 23084 5250 15825
1797 22025 9149 24765 48 5681 6558 6690 31323
1798 12305 7697 21793 27482 27790 34079 25134 9056
1799 28797 45632 46058 45597 9039 56613
1800 53177 19129 76305 6888 39716 395
1801 32747 13047 12840 33466 32045 278 25343
1802 8261 13057 8258 8447 35457 42033
1803 63056 63057 63058 63059 63060 65870 73225 57084 63067 33916 36219 8861 33918 38858 35587
1804 23106 18241 43017 41970 4292 45196 52081
1805 21737 31605 6589 395 8051 5607 34155 21785 30470 24948 30466 73 29232 30462 118 6581 17 7227 21890 23748 8060 56 34817 656 10826 382 7427 29505 33142 10867 239 596 8766 6657 10796 31 196 6828 27675 23995 25215 4785 5369 11926 27678 1870 6603 27676
1806 7755 2521 11984 10201 36432 11405 2352 25107 26588 10837
1807 12387 8432 650 8855 33954 24919
1808 1565 4938 4968 6727 5001 6723 14106 17 14019 6724 5712 995 8790 13676 30578 2334 2283 9704 13838 9693
1809 26303 32415 8774 28442 26473 4885 7759 38849
1810 50183 40017 3490 40268 57283 8271
1811 5799 6196 9961 26670 3870 46070 18110 42210 4546 4383 32373 6182 908 20947 6189 21582 6216 46427 39490 32564 44307 25431 6022
1812 44722 49745 21415 49750 54894 49752 49748 49751 36551 49753 9003 21413 39192 9005 18768 20176 18578 33094 33093 42341 37936 49809 60087 36171 67054 32378 49759 74792 31970 55638 49761 932 7716 80218 82363 47523 33086 19610 44407 56627 17929 67473 52668 41271 39202 65848 38251 21471 31328
1813 327 5417 32220 12433 8468 28163
1814 5225 11926 8493 1854 26306 33033 18546 7809 51028 21760 12488 22062
1815 41299 13015 11463 6165 22291 46590 11532 23554 4747 37120 4764 38097 46286 38473 13023 46580 38481 13022 13025 9289 49633 39070 48907 1280 37124 22515 35883 9299 6203 7907 13034 27056 42107 33220 22511 10087 10102 50895 33774 42070 38483 33595 33594 67581 28638 8423 56549 33775 6260 53675 23628 691 33710 32619 41555 51646 26458 60294 43452 42110 31752 36084 34683 40993 83672 41786 40094 43068 40871 27072 29184 35566 29166 40189 34142 24039 22991 12764
1816 29345 24020 8998 75007 11662
1817 32423 6363 34198 25043 4797 5357 21471 29833 21656 33916 551 7501 40717 1924
1818 149 378 8284 10952 36565 52
1819 32605 24171 7250 1428 7289
1820 47639 374 29801 28128 8623 35911
1821 38918 35205 44367 8877 21956 5410 704 28975 27824 28186 1579 11936
1822 28924 35500 52791 27995 8091 40952 7600 27641 9072 29 7028 9091 10839 25282 9075
1823 8257 5165 8637 21629
1824 36008 41217 10861 6906 23806 45291 30067
1825 52851 40120 57987 59808 66816 90977 26879
1826 1636 1632 1769 23646
1827 11214 16514 38 34961 44 41274 23885 23764 1652 37569 427
1828 105 27025 32131 8766 976 1311 4548 40433 429 8248 1069 5445 6914
1829 27723 7809 10790 7815 7798
1830 1238 4740 10316 33321 44938 9297 22515 34672 33687 48086 30807 52343 50711 55077 39940 42527 10848
1831 35457 8338 23770 23646 7726 25302 7786 7140
1832 24265 9342 7392 41855 1581 86707
1833 23129 6577 29382 30524 11665 27674 32212 5392 6911
1834 2732 23964 8841 30821 29665
1835 4694 44934 46154 31219 10071
1836 40873 31094 9876 55782 31844 51470
1837 57014 49917 39384 38482 39508 39440 41626 6255 50759 45467 39475 39919 32065 9022 43801 71205 90341 52467
1838 6196 3031 7468 5942 6227 9482 37780 11872 2864 36841 19544 1111 10911 628
1839 894 31337 19212 3765 4102 30603 43744 7856 17359 4292 1565 6644 46395 55971 6872 16416 22236 19680 5209 2309 4243 35275 28594 15454 25404 15911 11480 89 37134 7424 15042 8507 12547 15336 12668 25117 14854 4634 19058 19944 20324 423 2455 5070 11540 3374 20419 47067 5888 30933 3972 15908 7904 17142 10336 8517 40638 10223 30627 22223 13789 11558 5194 9426 4737 10587 5599 10680 30975 39369 21579 30648 25380 16198 7972 46604 35323 68250 26802 23244
1840 11580 43644 37113 22464 6490 22475 34597 7906 12744 10700 43366 22677
1841 22534 11132 26977 6247 28637 12260 43310 55170 22542 40412 74951 41696 28645 33630 22631 22621 10677 27073 12405 5471 24854 28122 1647 26683 34070 35230 30721 22067 6076 22085 12494 22068 26787 5397 1543 8002
1842 83448 67166 44662 34594 30623 21410 35858 9484 47132 46835 30958 34853 48888 23593 20342 33418 70125 23597 35315 35865 12370 9487 35872 47133 47134 65732 30982 30208 22299 46647 23632 39484 30996 56194 59648 23625 11836 9492 30200 36446 12372 79206 58709 23618 30211 23640 44924 11850 42695 33496 43317 44612 59931 42698 36874 41945 61726 30218 43342 83532 53721 48475 90693 48531 24799 30247 30248 27090
1843 52041 6030 24124 33115 6860
1844 2721 35936 42783 21897
1845 673 8261 9360 7642 710
1846 7408 38878 10165 119 6523
1847 23776 31000 9309 48233 22972 973 12591 6052 6658 12877
1848 20418 9479 21164 9484 9487 23611 43040 9492 45484 30206 30218
1849 16780 708 34894 3073 13735 6828 43279 6617 31963 36102 36875
1850 28707 6830 69470 44426
1851 2578 45573 28944 10699 11562 11496 11444 11536 7384 11541 26961 38308 11558 4243 73431 4024 46292 24609 23621 23594 11488 10701 37547 43763 48154 11611 11613 77856 41018 48214 45284 11589 11516 7971 11582 22452 11538 32065 11531 1502 41418 52789 52790 7208 1924 35099 1047 32255
1852 36366 19228 20631 17877 20650 12370 65966 45473
1853 27529 33513 5597 37072 1585 22995 25324
1854 7940 39940 37248 39926 40029 11167 33718 35564 46564 28264 38034 80625 29601 29138 29217 18944 9023 1124 12862 7637
1855 28277 28282 28663 32258 7208 21623 45219 27797 32819 24761 33867 8884 47244 8205 26580 2100 12913 5096 43279 24702 33787 34407 1550 21471 35584 21943 1539 1924 33326 21475 7153 31943 26828 44082 33601 29519 33128 1432
1856 14274 35778 45869 9511 33141 30452
1857 1017 28498 6624 1020 10826 8869 8870 27281 12871 12873 7504 33262 978 643 11307 7833
1858 40952 35226 12381 621 24946 7643 23154 30504
1859 6556 28672 500 14858 502 14611 32187 27102 6608 373 5552 10002 32829 32831 27699 14535 517 15239 10491 519 16594 12433 34870 15695 16840 10533 3344 17033 14148
1860 22071 25061 26655 9306 9515 1006
1861 48609 6255 11811 37512 2040 32522 6260 36559 30809 33437 44337 37155 9009 7716 11835 39598 39543 40728 33251 41005 39773 32381 36284 39808 39893 12372 35055 11849 33462 23643 33463 40101 57281 33634 28880 11178 37426 55764 11865 40213 64758 29963 29741 28644 91415 53506 82158 84745 56419 82251 40986 90517 35577 33510 35686 24762 21959 956 5599 960 11318 36875
1862 13511 52071 27375 41544 13343 7589 13339 13346 17903 9050 7523 25234 17996 35453 10880 21770
1863 35255 8633 24946 5616 5622 5629 1555 6617 1559 21894
1864 34012 5569 621 278 50106
1865 87435 86244 81887 89722 87523
1866 7553 1428 49578 31976 52463 31626
1867 48568 82193 55844 44676 72278 46357 59282 89245
1868 24541 25490 38808 32840 28160 27436
1869 22182 32076 9277 60092 91578
1870 10772 23176 44582 22063
1871 8109 8064 6513 9099 32946
1872 40 8550 55483 8633 37660 38468 34907 6338 8488 36573 6094 4061 35385 9317
1873 77774 70594 45909 53672 50281 79314 86521 56497 88547 56476 51747 9518 51728 87521
1874 18732 41674 57313 31459 59358 29856
1875 62409 8270 33793 35547 53978 6214 6897 34269 7974 8231
1876 72141 41807 8194 31583 8322
1877 59382 42217 11862 53625 79453 35916 56285 31028 31031 16728 18758 33074 86820
1878 987 12291 27646 395 410 5607 34894
1879 5964 379 8030 8055 23036 21610 9380 23725
1880 33197 27223 28119 25370 9160 44853 46756 12755
1881 12843 2961 33493 12369 30962 8322
1882 7812 35619 25666 10995 7810 8099 11272
1883 37627 10788 29375 44294 7255 1439 29702 38123 33835 7300 38284 41591 35215 1
1884 691 31333 24093 395 24157 5445
1885 390 5641 1427 7995 606
1886 2923 6906 118 12863 967 674 7213 934 44353 8 23909
1887 10002 3356 7633 8099 149
1888 23607 39490 21069 62745 38887 5259 74698 22957 23624 66397 63678 67474 36561 43261 23639 23038 68236 58752 26261 953 65024 81869 37362 29718 44824 43260 7716 4292 75007 43964 29720 4415 41262 52089 43266 58121 28644 44943 85361 68951 74722 59382 42529 90949 89857 12498 35453 35454 35455
1889 16116 19565 23515 53159 32752
1890 11775 22436 37122 52635 89501 23665
1891 44367 11769 4554 8936 40602 24400 28181 29861 40763 23147 8894 1367
1892 23983 32795 30832 5329 373 619 30437 26637
1893 54440 52682 28880 60484 17563 11869 46402 30208 30256 86823 35105 44691 26147 6990 26617 30672 29371 36326 26527 58077
1894 24442 26180 28094 2023 29100
1895 25144 24219 5458 30813 2923 11632 11983 6030 28422 4885 44038 26835 26636 527 1370
1896 10386 43398 72663 42230 10392 23615 21021 39545 33512 39654 34612 36702 22692 61700 78492 40057 31282 25388 22800 42510 37421 54249 40240 57692 33222 39241 27025 5465 30680
1897 53493 46588 7420 28846 1670 6758
1898 13130 55403 27386 43350 75343 41131 47266 87767 89509 21526 6523 13093 33059 21633
1899 24774 28524 22328 6548 1798 1618 5432 1621 22962
1900 8434 220 2246 4938 14623 24826
1901 12417 27906 26537 23269
1902 687 31072 6828 8725 9131 136 5616 7973
1903 41553 34580 44164 40737 40772 87461 34148 8458
1904 1373 41340 1042 26756 9188 33993 33980
1905 39514 37356 39516 39532 39172 33248 47801 44322 33475 50191 52743 42478 32121 37362 27072 39853 33465 51285 61238 39989 33256 45866 33254 40180 60186 37428 61183 55402 62216 90200 61186 34399 80006 79362 40309 89262 42531 32793
1906 28140 4051 21607 26696 23989 15747
1907 5801 38923 3798 826 11056 8210 5831 4390 26196 25495 19417 32369 38435 42256 39274 40813 44798 62235 48447
1908 30124 2388 30064 9395 34166 37940 9785 12160 1635 26741 24718 5966 33151 23984 1775
1909 13017 13019 9236 11557 21573 26110 35826 37612 32113 35549 32747 5926 45616 21586 6232 5214 10381 69463 44606 35686 79363 43531 41824
1910 30975 50767 39349 33692 11832 26458 33706 11615 11148 39753 21597 35796 37563 40022 38227 57284 57983 52683 7386 21863
1911 670 8249 29359 35994 8866 11208
1912 28507 7779 27445 2562 6517 7972 3911 1653
1913 68 7411 8781 35392 29656 5383 78158 33 24173 22056 40745 34287 13085 9055
1914 11532 22268 38306 11483 10699 8998 35850 35849 4764 9481 5604 41301 1424 33220 38549 8029 22297 32749 8910 1087 47159 23590 24645 70492 7971
1915 27175 8274 37919 42069 53342 36285
1916 24824 25414 5394 5738 27685 4860 25151 30474 4932 10412 47057 10588 5744 6353 23154 1587
1917 1063 13060 695 8509 29511 8354
1918 29992 23637 11441 14467 48420 41374 33721 1787 704 38451
1919 29667 37550 6083 5952
1920 40028 40021 40112 35565 43773 51462 24800 40264 47637 28644 83359 48986 91385 52745 7974 85883 7906
1921 10768 1112 9367 23983 7850 26696 5329 6132 5263 8833 7289 13067 6099
1922 6405 30316 12505 24157
1923 10686 35797 22248 10895 22262 66684 11999 32390 11995 22293 22124 21956 32526 28179 62547 10958 9964 71257 4668 36583 7791 33721 46556 9403 27583 35056 14053 2307 7789 1402 24946 9823 240 8479 9859 36609 12799 9898 62015 37414 46945 9941 627 9388 22176 56246 36680 26693 24878 18686 22025 27658 23711 8010 40929 1011 7726 7243 47940 658 7786 6990 664 5464 958 28582 7722 28406 28407 32570 21621 32017 23696 38852 5929 24518 1424 32812 26806 13073 5455 1372 8801 1673 26485 25004 24676 31003 31233 7776 38111 8899 21476 26578
1924 34056 51764 37941 15075 30501 54629 51545 11726 43947 43198 30208 21338
1925 104 31321 26756 650 10160 21626 10779 973 7227 26697 5101 30440 6623 388 12279 1153 8550 10172 8323
1926 29349 11313 27080 4119 33755
1927 6958 11950 1554 5974 12026
1928 8395 1924 36066 35992 49161 7231
1929 7891 44763 23628 22012 43459
1930 26277 35936 7190 41529 10948
1931 6918 677 7199 8773 24450
1932 12367 11808 31156 60294 57807 38915 46585 8068
1933 80189 61858 29226 69940 26656
1934 10416 1713 667 1384 10814
1935 29583 30132 38804 21289 37698 53602
1936 26649 5397 13060 23152 26808 34442 30476 9364
1937 35661 8561 21949 25057 32084 30897 3514 36561 8490 8411 28947 4686 2717 11532 44593 39846 1713 38887 22275 46611
1938 29883 7730 8801 31615 1926 5476 38 670 7139 36117
1939 8526 7726 28428 26059 11650
1940 31699 6262 4214 65218 10652 6269 35870 41643 47422 39485 18894 24766 31580 6297 7724 34073 10490 24604 46501 1536
1941 10982 149 25543 11286
1942 2908 45167 14561 45090 2766 6070 9786 37639 2958 2959 9795 13503 9845
1943 19199 23565 35018 4384 20158 1263 21538 24655 12618 26255 34031 37362 7936 42117 7941
1944 31977 6030 24735 640 22956 44677 29009
1945 91575 91200 89480 86897 55005 91580 35575 40986 40987 87632 50836 28211 72640 63738 88281 91574 59366 91529 90791 82809 89234 37931 4797
1946 6168 6444 8961 4764 32749 12258 23633
1947 53355 41458 59626 70499 8231 45817 90452
1948 7848 12543 35097 35423 38811
1949 33964 34143 33794 12592 23301
1950 12870 4601 29633 5513 4600 164 4997 1420 7417
1951 36646 33137 66444 11769 35298 4762 7718 44763 12841 46763 7906 12840 33250 63247 10024 28963 37004 35415 5652 39316 7716 43302 35344 28880 33793 5981 32522 10820 39930 6252 76806 78317 9019 1640 9020 10576 391 5101 5643
1952 37318 43564 33068 5202 908 24351 3353 26507 43603 5257 31625 31975 50822
1953 7429 7879 276 357 13388 32825 203
1954 48961 23618 37175 23631
1955 13841 2380 45015 8500 5712 23233 14744 14388 45016 22990 34444 432 6734 40353 24834 621 42993
1956 21131 1307 40406 35660 10084 28200 46419 60371 22587 22633
1957 31787 30450 17205 21488 12431 890 893 23342 23343 8701 8596 16749 25722 12439 23312 48615 23313 3762 2057 35751 19269 16127 17063 23306 18727 22250 8640 8657 8660 9290 22455 24959 12712 23324 8630 8631 400 7090 24948 23328 23330 31963 23331 23332 8599 8597 28876 9626 8490 13821 1352 23309 14863 42754 5784 1215 29814 21069 40745 22324 18578 11326 36617 34735 29667 36775 32725 18893 20280 15536 444 2757 16361 23449 69093 65979 32896 33958 19582 48455 29938 19289 5152 37945 20820 18891 67164 22845 7306 27436 35237 22996 650 408 31957 41941 7267 5597 198
1958 7803 50106 5370 967 14 23885 25392 10938
1959 10150 36082 34616 367
1960 62409 68778 84017 24248 37625
1961 25145 7571 7555 32457 50605 27890 50604 9066 47060 7551 467 73034 9502 27950 24992 21772 7691 29675 8659 34916 31955 27362 36100 34089
1962 5907 32110 32125 21592 39838 45579 33711 27417 26211 29172 40130 32391 39820 46888 42483 33253 40097 40086 40093 40218 10906 40185 22885 40184 40123 40241 6264 54028 40264 59381 73490 81598 43528 53625 40180 88212 40091 59368 81493 32398 9899 59380 86189 37433 91380 81154 35567 10914 50475 56285 32405 10920 50539 10918 50651 32566 70515 11871
1963 29622 5703 32774 5632 1379 60 27493 106
1964 33622 40889 43646 39241 57278 21833 40890 20368 5698 42664 40891 28058 41139 41140 41141 41142 41143 41144
1965 5677 24555 374 8884 28823 27672 24758 21471
1966 14090 15233 14806 2598 16681
1967 27552 27598 669 30692 516 890 13038 24826
1968 12593 4939 13434 4932 4930 7196 33333 615 23116 25293 40696 1148
1969 6963 7866 24992 6989 41561 6949 10933
1970 1550 24758 8843 8841 6676
1971 40708 45480 31156 6153 7726 10865
1972 46041 43698 40132 46040 28784 43614
1973 36964 11075 4735 30329 32721 1866 5787 36665 36487 12709 5873 8407 41250 49031 36670 11561 6166 29913 37480 72391 18319 33580 47831 12783 10343 5802 19626 857 74520 53051 36582 32892
1974 9199 6020 36207 11673 9354 2299 12058 25176 7296 11659 6348 5540 6742 40364 1261 30080 43074 27802
1975 30398 33497 21770 27366 33841 7529 9066 42684 28813 26021 5457
1976 77758 60719 56866 59639 56978 76972 74135
1977 26853 13163 937 39403 6247 34615 34809 43369 40726 43371 36706 2637 27867 39709 39600 35058 53599 46269 27074 71285 42223
1978 27740 1432 13085 24150 27638 48
1979 41933 23589 43302 51882 78338
1980 23838 1169 23959 1030
1981 33715 39323 39584 44308 36272 25516 50350 23418 57092 34137 23637 33706 39654 39518 33720 9020 33719 39735 23634 9018 39720 10662 39954 50839 39917 35897 40021 31691 36282 23640 29956 34950 40024 80139 33711 27720 35055 53442 25519 39833 11167 40113 40104 29959 10909 57281 38393 40263 40205 40033 40108 26210 40115 40034 31719 39951 59361 40201 40275 40109 57283 8271 30748 37434 35562 40101 59363 11854 35565 29741 38828 59375 57284 77324 35569 82945 11843 71804 59355 42323 11867 33491 7974 39993 73189 85505 40206 35571 82158 34140 59376 91580 33477 91384 85618 86274 89899 35575 23976 1063 56 679 37779 660
1982 44136 36391 36022 33613 32722 34342
1983 21154 10059 35797 9041 4054 3566 9067
1984 79286 55777 80087 54642 54596 87818 72074 28996 54666 56270 66312 66957 9147 32132 7531
1985 29277 8274 55484 39093 26186 22026 216 659 23740
1986 261 66376 81835 85798 59218 59219 59220 90145
1987 28476 3537 52110 4564 42369 36125 12574 64111 3048 37620 25384 3458 20808 60138 4255 8958 4451 57534 10699 44757 41234
1988 29347 8346 8794 59911 38887
1989 16439 17179 17424 18874 57760 70081 69080 6411
1990 8105 42544 7413 7417 7630 1031 240 6043 265 175 28976 220 12396 8741 28977 21842 36613 171 9057 25356 12351 42 8421 39910 13050 195
1991 27573 27580 7068 62409
1992 45373 30017 11162 10337 29401 43270 43251 4024 10100 68670 64642 32687 13004 71839 57984 39710 61264 7923
1993 54412 86909 35027 57768 66493 61939
1994 14 1373 120 27470
1995 8407 4867 17657 28697 5911 17798 17531 37698 32395 8332
1996 26974 39347 39322 48742 32001 39445 930 38249 39638 11610
1997 44673 12255 45478 19445 37120 20849 31914 45182 12506 24790 10826 23072 8428 6958
1998 31487 20292 66522 35517 74000 47065 46418 20080 54269 18587 1389 11326 49022 445 67619 15195 64813 17939 51516 38131 2888 66010 9488 20747 50764 9955 75554 65660 80772 80770 52666 65666 65663 65669 65672 7898 65673 58121 65668 83628 63261 44472 91471 44163 11318 29373 36875
1999 949 948 32395 42781 36581 33386 30791 67127 44467 77461
2000 6399 23838 395 604 5934
2001 50582 45947 43895 76520 6871 52615 23227
2002 11449 40871 1 7950 38482
2003 35357 5225 40263 11186 11870 48682 21773 37959 25145 23987
2004 14 1063 10840 1344 1383
2005 91285 36584 72037 44079
2006 110 36242 1652 33793 52 1069
2007 8910 8276 12567 24311 30660 1200 8421 22271 30903 40869 46661 31052 3991 21626 32033 24650 23554 33220 29381 10705 28523
2008 26766 30849 25384 34816 34208 33133 5468 44133
2009 1306 33424 6220 1595 40570 6010 10370 13260 6038 2346 37640 3682 43310 33600 67472 16689 39534 17387 8267 39626 10130 32390 9023 35843 39987 61514 28880 42322 62214 50480 8345 1798 5654 22983
2010 1924 32793 11873 1647 1682
2011 43996 2410 22091 1950 29985
2012 12384 10158 11312 9645 10152 10703 1879 10146
2013 29132 136 42534 35661 10141 41037 29693
2014 35296 39382 32085 33257 39375 43889 39347 32685 11139 46185 70653 39620 34778 42481 39988 34776 44129 40091 40019 45868 28201
2015 21626 34552 5740 35571 9012 47248 59355 91203
2016 2583 51390 2808 49896
2017 196 429 34 32169 31316
2018 35079 41590 35961 12535 34453 12071 8852 36350 35197
2019 1816 44028 1836 6030 11892 7475 1630 1382 30551 1366 25041 1754 31907 7311 745 29844 14553 25038 29445 43197 33924 28089 31599 8713 6452 378 23124 29367 6458 921 1333 10785 29840 21885 40993 28068 36169 27887 34390 30474 3957 24891 38251 32394 11176 1258 12371 36335 1694
2020 12980 55026 39687 43153 3262 6220 57977 36446 39329 29160 7975 8772 17 6904 59
2021 31764 16404 7545 27552 19317 36426
2022 2428 8870 7995 21774 1586 5596 30467
2023 37543 60597 39968 52960 54326 39998 40136 66661 20232 67770 78630 66878 59562 84101 64908 40308 40498 60604 24269
2024 49470 49958 54983 49379 12191 49975 49969 49965 47975 71366 51694 47972 47963 61321 61638 47951 50255 73308 64164 71999 50013 51751 51753 51754 52782 56434 49994 34470 47960 50018 56439 50022 74992 59650 50261 67192 67191 43218 74499 75886 56494 56453 50271 66832 49992 66261 73312 74998 81924 41008 21369 43607 56542 45909 81880 54791 79307 88259 87377 87526 29624 5950 114 670 33326 5978 11963 11957 23159 37660 1532
2025 33818 5590 32438 33
2026 11665 566 10934 191 6566
2027 30307 34127 18827 23099 3911 32449 65156 40021 24721
2028 28552 1608 8377 4844 1568
2029 21812 31633 42404 23812 23682
2030 42200 68669 77274 7908 62
2031 37025 6225 50193 11151 39850 41007 50196 32067 51300 33574 40168 40271 39864 40104 40152 40165 39467 29195 34950 38979 40075 11847 29194 40177 11180 11192 39986 11191 40163 7943 28201 51851 39866 26213 42322 29202 39233 35887 83534 22950 62982 59365 38981 79364 47250 11864 45263 70540 29741 80005 33720 39792 36284 59903 33498 40259 72640 49163
2032 5279 12279 9395 1097 8304 27864 12167 8322
2033 32082 31363 27489 7487 26746 33667
2034 334 11333 975 337 10818 2268 13067 242 315 23075
2035 23920 72180 66807 34446 5021
2036 34135 52673 43527 33721 7938 14572 33793 7943 72638 15129 59363 7950 7468 79950 33020 62298 33466 59818 49660 57
2037 23320 8420 171 12579 22366 35734 12606 12773 24208
2038 88596 32883 1703 31833
2039 5405 10866 10827 31321 18
2040 4988 1578 551 5001 25332 1031 29402 2246 5030 6407 5036 5015
2041 40353 55399 26966 114 34445
2042 778 24420 779 10836 49 23696 5461 670 5182 606 1916 367 118 5984
2043 30379 34702 1076 6459 1787 28215 5262
2044 25358 72980 78106 33467 36832
2045 15 10853 27786 26473 31925 5579
2046 8323 5580 5351 6822 13174 28444
2047 47898 9040 52463 23640 29921 57595 41393
2048 39241 33622 7207 40890 6409 124 40872 12304 12306 7028
2049 23013 10864 643 11928 12388 1585 7491 6650 27450 34160
2050 1200 33920 23073 27747 23773 22357
2051 35401 45493 7788 24499 12788 23767 32077 10596 22531 1292 30134 42323 39942
2052 3363 18504 26340 34390 42481 58916 84744
2053 7808 25609 29262 9976 204
2054 36550 78529 12367 39667 29148 39511 7894 11180 43052 49105 22785 59659 40250 42797 89815 55761 21892 5375
2055 39334 23643 40009 39871 40090 40077 46563 38914
2056 32068 43962 29149 8863 32422 10707 34634 29280 7215 36398 139 29339 7487 26711 8489 30661 32481 36786 5391 41491
2057 609 612 17 241 30492 7983 34831 1635 25301 395 26181
2058 75198 43118 40610 65098 56684 54746 74457 43859 53061
2059 51307 22852 28880 5140 22850 61183 2379 59370 43801 5604 43802 26505 4118 68697 4841 52888 84745 45583 67691 38844 52467 45876 44496
2060 1325 48886 1879 5095 41468 82063 35659 28074 6204 21312 22629 53087 43761 48289 918 46545 32110 65062 81082 75924 66458 9530 56554 23215 79780
2061 19167 8231 68713 10094 35725 34601 30634 21570 20714 11819 19051 47067 32492 48609 22307 55176 17721 9437 39377 58072 39395 22005 11820 27408 19189 1252 7098 32386 32193 6573 30975 6240 48034 39469 11821 13045 20405 33414 31710 72402 6842 21405 24606 37405 38818 39595 37155 1418 20393 11 8221 12850 10679 50469 62721 35449 39042 10617 39775 39170 51276 39589 13021 57075 39410 51795 9249 39810 5097 31178 44402 56114 39701 12372 29952 39921 50227 13023 46835 82212 39964 39642 13053 18751 35275 20223 11144 33463 37362 37185 31647 58076 34131 34556 33443 11844 13004 6700 40297 53497 28880 33420 13027 2807 10903 40014 20419 37420 57155 22457 31713 40181 76597 40052 55568 29210 54456 43249 39281 57987 59903 26691 15241 53506 26692 35451 77233 42490 40141 36584 62409 50652 12369 42280 37487 40499 7716 32528 53498 30933 32858
2062 44533 26570 34659 23501 10394 9009 41853 211
2063 7562 13182 25278 27933 38397
2064 62431 61446 57386 57387 52734
2065 5312 23305 38407 6115 37713 9195 30103
2066 669 6549 1792 46251 1425 7243
2067 4826 6285 5612 24829 41659 22099 27213 4798 8504 7241
2068 11167 34774 64881 30205 25516 60999 39781 52675 20329 39867 39874 39911 36531 35057 40194 40125 34777 64096 33723 43113 36836 13763 39801 55677 40273 39969 7950 11175 76777 53774 7964 35451 26518 35859 68536 26396 59129 34193 72905 64197 39833 43910 61599 74722 59120 57156 91385 75010 40132
2069 41524 36127 24032 38461 7290 2430 9199 24429 2882 24080 6036 25462 1039 3125 40698 33161
2070 45253 1392 435 26473
2071 47257 39688 39619 30090 47640 22938 63336
2072 35686 32381 45122 38676 5622 13060
2073 27109 1446 13092 1389 8842 26696 650 23106 691
2074 7091 6203 11592 11139 39447 1292 22277 42518 42251 22723 673 5286 86975
2075 46210 40918 26347 33615 36489 40393 42473 38217 42752 39277
2076 25046 29516 26538 27824 29665 1004
2077 59249 10350 40394 39308 46869 10038 23102 21042 50483 40724 44116 39304 39362 32723 39320 32004 33442 36567 33539 10083 39229 7890 41201 12260 37915 39693 47257 41373 22695 39950 51277 8421 42521 39690 40251 54462 86732 79405 11871 90797
2078 6504 6868 251 28290 6571 29873 30745 8004 31141 21506 22974 2000 5584 6590 27911 8021 5431 21497 28356
2079 51841 8301 6602 9181 3771
2080 3513 10564 41591 12819 1065 42317 10727 32877 8998 26252 45430 10086 24647 24606 32550 43310 42230 60267 43398 30809 39466 27066 27568 36561 21597 39815 11849 43964 26688
2081 31624 8488 1427 28082 9472 11995 29370 723 5061
2082 49151 66684 42909 11090 42115 69278 42525 6984 12765
2083 35919 44841 28830 1443 38072
2084 39588 71339 24441 47088 42064 71188 45804 35797 28810 40354 42990 39888 22702 22733 22734 43402 42966 22795 40117 40167 28478 50641 59387 82908 35567 82906 79128 12471
2085 7216 6880 5600 21816 42498 23772 26821 36340 7984 32816 87 47059 43281 50414 29680 5699 43 30484 387
2086 10591 39571 39636 39638 53115 44488 39709 26688 52678 42693 37422 11861 76725 56895 39731 40091 42485 44467 40214 84745 69103
2087 1360 34965 28868 8836 22313
2088 19719 10505 3593 35050 83945
2089 9404 27211 24864 701 6823
2090 70272 390 7227 28830 14 8 1870 967 606
2091 7189 15 27695 172 1585 32858 7491 21863 11279 33 8708 6667 5467
2092 6102 33287 103 13052 12196 43251 11149
2093 5426 33430 42004 77324 36960 28439
2094 7288 24435 5659 6405 6984
2095 35938 48954 21654 3356 24498 3529 6830 45457 24151 26308 38790 2914 203 8747 10749 23281 38402 23617 35166 37087 29991 11345
2096 1709 22271 19469 30897 8416 10739 2571 1622 34516 18514 46724 43385 36034 32680 32113 62214 49161
2097 52 11634 732 2441 21611 1582
2098 705 22573 1835 23751 3564 694
2099 31057 23150 39262 42118
2100 35610 35 13092 11557 46287 24102 40870 1329 30530 13869 29170 33760 1011 75007 5929 22065 9312 8108
2101 68567 55034 44845 38288 13839
2102 46406 3651 34856 26496 66489
2103 8750 6929 5294 5296 32245 13799 2713 5310 995 7328 1911 1017 6085 4938 6047 9658 33163
2104 15095 9817 15051 14546 15250 15233 15174
2105 21471 23061 1694 1753 1373 339 36799 34409 29588
2106 45795 7291 23017 24449 32481 1669 22965
2107 32407 26693 6884 6668 35461 89 12320 22048 28587 28975 1924 604 684 44 10628 30470 29657 9040 9044 9071 30265 42462 26590 27906 27912 42372 5414 1560 1947 37348 5437 28574
2108 38449 37922 39627 42253 55459 39895 32012 39945 39665 39404 39961 54437 39893 39984 39794 39579 40105 59723 40173 11168 57155 43773 43270 33185 25532
2109 20222 62147 60136 26254 22524 40950 46877
2110 52680 58916 6822 58904 42365
2111 3027 6081 8912 23364 6389 8947 9357 10720 26912 2512 32073 9180 2287 27595 2871
2112 9786 21489 509 3332 20979
2113 28159 12756 662 50298 8323
2114 32749 61042 52045 53531 48773 37546 6733 52060 62433 7894 39667 12850 47075 23631 64136 65317 55632 8641 35067 80878 42692 46634 8664 50089 8665 65668 39741 33441 12855 66 24765 43 11744 5703 39252 7432 35037 4956
2115 2379 40745 12415 7512 5392
2116 6338 4808 26641 23266 32570 2033 9594 5329 1885
2117 29058 26362 44077 43201 21584
2118 932 45439 34345 36736 32065 40263 40107 32300
2119 61479 53234 23746 85504 13031 90320 31662 23572 29183 29595 23033
2120 1006 31782 26473 24147 5475
2121 3877 41655 7711 36253 12992 43488 12811 3440 22425 24194
2122 26521 28451 11784 35962 6815 3 5505 23529 5740 26636 1224 1636 5671
2123 20806 32601 34239 11098 979 43888 62933 39834 28820 31873 46314 28845 41819 41818
2124 6714 203 45793 166 62 669 566
2125 39172 44672 7894 39663 32692 41005 45188 11148 39515 39589 10681 30649 33443 32061 44488 39670 39666 37922 11151 39801 39917 36276 37413 42014 22961 35727 11166 11184 40269 34556
2126 24323 6807 24334 21887
2127 18708 33760 1204 22004 34215 30351 10087 39584 39716 24665 53442 27072 39778 12759 40209 11188 39790 54028
2128 16609 5259 17718 11279 7410
2129 28742 15091 3006 5491 27744 11279
2130 174 5967 8432 1543 30286 6405 44330
2131 29912 24720 9293 38224 11775 11606 31574 118 10715 2315 10132 41551 31754 6802 37071 23652 397 26820 27802 12045 40293 27109 9172 36006 7250 35946 24147 36821 97 10410
2132 39741 22784 42479 2970 39808 35447 39831 9017 32058 39812 3146 39596 39751 39962 26212 26261 69481 11862 53625 26691
2133 7419 33773 6487 12320
2134 4957 8573 9374 1427 8488 37505 9317 42552
2135 10852 5695 40370 22221 5147 12279 29297
2136 23579 20415 23641 39995 39710 8340 8388 7950
2137 77680 4923 58815 49152 43172 15993 12221 12045 10710 11303 34249 10821 22986 54451
2138 72423 22268 11663 2750 10388 24846 9765 7752 7999 12863 25309
2139 7340 31134 598 33186 24381 7989 8746 30503 12391 32570 21621 22986 29350 10851 26475
2140 196 22069 8275 31316 38386 61 8705 46
2141 28434 35109 37132 366 41020 7229 31613 700 10409 30033 24010
2142 16965 24158 26718 29425 31622 11
2143 24364 639 38462 8261 5928 12024
2144 1352 45478 34717 62150 12839 23270
2145 1754 54923 52447 23785 29321
2146 90459 81313 22919 90540 88179 76257 72677 90285 88825 77189 86815 55815 88146 89608 89622 90650 89279 73330 90155 48589 75867
2147 6575 6623 58077 972 7410 27680
2148 82359 60251 74796 73407
2149 1973 5115 7487 15041 1916 1106 35630 6889 1014 24923 7259 38856 1382 1596 1625 978 37499 6907 447 28874 23968 26558 670 655
2150 15333 7371 6257 23458 32571
2151 42322 40099 79358 45263 42260 29741 39955 29212 31327 47393 1793 46026 27782 12327 7488 28183 5371 10826 36113 38923 38922 1608
2152 740 732 8449 9355 42707 746
2153 17065 29348 3573 5590 18802 48701 12320 5405
2154 5151 39316 33226 68 28218
2155 81779 69017 80499 38219 45829 48812
2156 46557 40250 29194 51851 26210 11858 54456 37421 32623 40141 10905 57987 91417 91584 36890 34145 90624 91580 40599 82159 88258 2300 30914 34963 26923 24230 12462 1 33812 11208 24497 7012 25202 26932 40 30632 8592 10273 26841 10423 5929 32021 7026 48991 27699 24173
2157 64343 44890 46073 36109 57592 27971
2158 37418 40035 40089 40130 40218 53720 29967 60726 71272 50475 59382 88729 32402 91594 9046
2159 22179 4743 32797 13135 62248 35610 49734 6482 38812 3675 38146 26253 37479 12028 11649 5237 11655 7232 1962
2160 23340 8729 27699 5568 12226
2161 16067 10233 1826 23371 11748 45009 10697 10559 10108 25121 43275 28963 24682 24149 33322
2162 17 1438 11678 12266 1443 1180 1657
2163 5465 5463 12498 23693 717
2164 8330 34553 26981 4905 33941 9010 30286 22310 12851 53599 9012 39837 39878 53442 35243 22810 34122 27697 34950 39951 35560 37416 37419 7732 25014 40256 42486 59361 59378 40027 82158 59366 1660 12269 1464 37023 34480 23630 6132 27774 42499 1782 31099 1644 12036 23796 174 8482 17 37755 12026 29847 38317 28678 37339 1408
2165 29344 1070 621 239 4558 4561
2166 1308 10515 49115 30166 14904 49708 69095 43355 38310 898 4301 72662 43152 9009 10677 11166 37634 23045 1674 652 11701 1459 1241 8837 1349
2167 47119 25735 25904 25654 50987 25989 56137 38340 35900 34498 51579
2168 19455 19493 19671 54034 19368 34038 19845 60592 73343 41391 43691 41801 48578 43468 55385 72636 8637 39119
2169 11797 32986 13057 44322
2170 34612 7896 39504 10404 7916 39686 45804 7924 42561 40047 39938 39936 40044 39993 39849 50703 11181 39894 56918 35059 57984 40240 40258 40170 53507 11191 40230 89815 28211 21901 22029 31922 8826 17 684 21470 118 55473
2171 33146 5931 1378 23112 36945 26776 38152
2172 4849 37724 6197 6523 4785 26131 47013 52398 37698 33102 1827 6099 12291 7224 10710 26652 26820 1360 37435 8061 24141 26846 35109 973 27802
2173 68398 58746 83323 57310 67883
2174 23537 6888 17511 18181 8184 18891 18218 32487 18897 5029 12115 12712 22013 19949 20050 6835 1537 10577 19210 7090 8231 12980 32490 21927 36930 10594 30702 16838 23526
2175 9471 8278 1024 6885 10388 21004 13031 8221 23579 29946 32381 31848 46630 27785
2176 43798 33979 29417 6451 36113 10158 8404 393 694 5942
2177 30730 47395 24176 27114 27157 11626
2178 13023 21839 37188 5604 34031 23978
2179 46586 34077 7866 25276 6946 9068 25275 6989 40531 9070 32900 31093 9072
2180 191 153 154 36741 5411 21485 29536
2181 36618 89 11873 1069 5445 23270
2182 48 721 35392 5370 31570 6623 24866
2183 31219 30573 10763 1635 29596 5465 373 114 13 374 10144 28935 42092
2184 21916 36438 15688 17631 12029
2185 1918 32236 596 7144 6906
2186 11592 35856 31013 30239
2187 8395 23197 8670 7156 1368 11210 31518 24834 24826 31517 2045
2188 204 7824 7794 25714 30798 25375 11271 23828
2189 10639 74661 80822 26508
2190 37515 6551 41358 12460 28121
2191 2563 47700 34331 7176 7168 17826
2192 41620 12830 45524 6183 19266 8268 26873 42791 9006 22518 43310 38482 40726 3513 27069 38823 39815 47112 39987 12652 37414 32092 33463 42714 40070 11859 32393 59354 47638 42717 22950 59368 32399 37430 45583 7970 42529
2193 2733 22221 12017 634 23013 45585
2194 30937 33467 30219 77619 77325 8187 33490 61599
2195 12454 5648 35547 31721 43022
2196 28317 26069 5762 24764 26072 26073 25340 37072 6597 8278 27644 26537 23149 6796 6650 8749 8015 954 5616 28925 1554 26539 9041 6795 7979 11279 410 8045 9055 23703 27746 9057 7866 9059 9062 9068 29821 1871 8004
2197 17931 7919 35564 35574
2198 31196 56431 5919 5921 13057 27131
2199 88314 40141 40223 40120 62703 33239 33261 76005 17949 63570 40125 29961 11861 71272 40220 82490 61013 60457 74678 79360 59369 62216 61183 62219 63684 39821 54459 50475 57987 37434 10914 50840 86275 73187 42019 90977
2200 77620 29391 35994 1637 7220 10826 973 13092 1653 23745 23744 1197 33750 1198 29295 1691 1257 29976 5390 26725 33749
2201 33854 33857 24893 2930 21757 34437 471 15104 16590 91236
2202 32553 35428 12048 38948 32554 25398 6611
2203 5506 28632 29738 10743 18208 22481 6490 10744 63332 80041 31139 33828 24697 22596 35151 32089 12031 2911 26688 8295 78638 55963 22918 35059 40870 32663 84745 46472 52349 29034
2204 24514 23747 42085 26954 10332 7468 32665 13015 43786 4353 41852 26171 45081
2205 24168 4336 8732 5669 47107
2206 35452 8071 10160 46027 6978 4948 31329 33916
2207 26733 1688 26721 8869 25403
2208 8936 26781 3991 54132 8349
2209 140 1031 38389 6517 8652 2561
2210 22273 28558 35442 34185 3978 12552 36808 34186 59649 35955 40058 42714 60521 673 40070 379 22271 10155 64758 1009 8910 32398 27205 1223 1222 62214 3342 74722 38482 27068 8265 5481 31518
2211 18751 8541 50766 23472 7310 379
2212 74675 61407 61410 81126
2213 42719 40788 69100 52252 5454 38878 25147
2214 30797 33220 34401 2065 22989
2215 21584 5579 5448 668 25217
2216 4441 43287 48356 26996 25384 10711 10039 28476 48455 9283 4264 6970 7102 5820 24804 31551 24547 23339 41488 26505 29053 8561 12364 85346 9023 30416 23615 638 9492 81304 24885 47761 7050 48340 46910 38
2217 11463 32183 10925 2314 9374
2218 7146 1632 24915 53961 4915
2219 15561 26295 6470 631 7851
2220 33716 12372 52156 5702 32481 24908 24348 7224 40602 23106
2221 58846 36002 47221 34829 9317
2222 10386 26872 31966 3381 43925 11120 33375 5764 3217 44476 36700 9260 33444 39555 39509 41006 57987 3006
2223 11744 33844 30014 987 9048
2224 7798 10811 27725 12402 6676 12125 7824 270 7819 25328 11220 11280 10983 427 27732
2225 5985 32195 6346 7978 7986
2226 527 11900 28123 2688 37136 7344 5775 45511 7367 5115 4621 7243 2287 7328 7365 28870 7336 29835 23777 31021
2227 7153 5326 9319 1076 33833 26484
2228 11 395 1373 114 6497 1769 1711 84 2521 669 13 5113 29446 7224 25410 6492 8381 1688 5326 374 1707 26888 32892 23077 1770 1854 5956 654 6498 27774 680
2229 55072 881 19427 34839 45423 32659 1267 525 25500 38410 36074 42551 20715 38775 42087 5900 9294 61425 28988 12730 38092 46241 32509 1270 8243 21034 39690 53300 57983 91121 77539 91569
2230 36816 2255 5506 5782 24041 5522
2231 6769 14452 5544 443 14508 5009 14572 6765 13714 15011 44710 8112
2232 13015 32660 22012 23587 40455 18972 10638 13047 11149
2233 28434 29034 7170 890 90464 5281
2234 1492 729 23270 8590 10936
2235 12109 12520 34867 22190 41876 22216 4857 38184 38419
2236 21650 6371 8359 33987 35701 6521 34404
2237 84217 42879 62 978
2238 24368 32139 28443 23137 1561 30129 10826 8322 23021 8292 10146
2239 26461 11156 50704 27554 26636 10845 36822 24729 26563 26589 9307
2240 5654 10826 27782 12267 11982 11281 1854 30832
2241 65943 28918 65428 44830 52880 31294
2242 26473 24386 32801 1962
2243 84 24592 21761 52 31955
2244 8293 29974 27049 22125 30367
2245 22695 26935 35756 45997 22885 22159 12757 19979 42281 1074 5916 22297 32791 1035 26963 51311 21684 55907 32526 27113 45579 71257 57090 36217 1478 32390 42108 39710
2246 35067 12941 73512 7964 7200 22061 29283 73 22025 30440
2247 57668 1521 66003 22629 70687
2248 10273 12764 3653 30797 23153 35531 28260
2249 426 12280 684 9397 42024 33814
2250 1603 76298 21836 84437 74795 48587
2251 50293 45903 39987 40677 45375 65562 87875 39992 52788 42796 33000 77324 47881 50480 1410 44935 34401
2252 3464 6616 26060 10410 382 960 5616 27642 395 1010 6906 10165 6585 1789 5580 26649 24946 7730 31012
2253 52636 56851 12169 32018 7311 56549 1338 41019 25380 29131 6341 45087 27067 49014 6340 35996 78259 1688 59528 38205 38897 14828 23608 6801 30905 10129 29199 45367 66685 60819 634 1704 27816 40729 23017 23985 379 35095 7350 23843
2254 62 8472 316 166 1031 26210
2255 8532 1148 74707 45284
2256 21828 24217 7504 1211 666 24229 29344 6117 25165
2257 6160 29346 24874 11731 23993 1791 21650
2258 1674 11296 1668 8051 1455
2259 21899 59840 1364 31305 50401 9865 34536 35361 15640 30429 30688 13522 42360 8184 52328 8619 670 49 5597 694 10866 41 45 7202 10950 10828 10827 10944 10951 429 7034 7833 132 420 721 10948 24 23 25 7540
2260 27043 46264 3161 40863 30813
2261 27859 32865 27148 25475 10720 43732 36228 51760 5279 8878 44934 1767 1126 44597 4453 8989 22265 1451 8826 45010 394 11882 28125 33155 35665 42236
2262 24999 53643 42764 32393 11639 76602 26970 42354 8342 8404 26578 24023 8526 8876 1056 2078
2263 13554 9753 6351 5723 50775 13880 13709 4997 6350 4998 15194 9765 33062 4810 15063 9764 43182 14925 998 28388 4814 23148 16273 14750 23434 47184 9942
2264 41209 40587 7132 33540 27414 32685 32695 39408 39428 39425 32700 65315 28548 28558 66116 28559 39993 34777 39924 39929 40062 39751 10558 30251 23974 67993 28536 43042 61175 52073 50639 44426 38431
2265 8100 551 1069 211 679 10840 5505
2266 19816 42232 65156 49894 36217 35686 1469 22093 26576
2267 22363 12169 79074 72876 90376
2268 22098 1148 23219 11636 24353 7402 22402 3928 5644 3841 25217 23075 23965 42985 1363 45995 5742 19496 1322 12994 33947 26900 2089 13091 21679 2190 1463 6369 37509 23031 25626 1761 28963 14161 41484 24954 24017 29843 25744 22461 30683 43387 12997 22325 23029 23400 21479 22398 30025 47536 16130 610 30317 8576 30794 44336 38487 58707 9730 5930 44169 32799 45493 53499 24731 27814 55179 23035
2269 180 5839 4938 2272 13673
2270 13426 6734 6671 4976 15528 6701 32494 12409 2879 13796 15307 5114 14911 9945 43806 23336 31793
2271 28260 25302 1084 38 33154 604 6506
2272 3361 49608 34611 34609 23939 33244 41853 35449 50925 34773 39892 34778 32387 50200 42481 35225 61416 56310 41556 33465 7936 36737 42016 57970 55594 38328 7958 28207 57983 62980 32396 42365 43532 88457 38331 33508
2273 44060 39865 29963 11933 22965
2274 9071 44942 27068 23635 34566
2275 15216 18591 49067 17673 19441 21575 2045
2276 3359 43268 31156 35661 1841
2277 11312 10147 24022 1570 8047 1133 33203 27510 34618 1571 35630
2278 42755 24821 29429 28648 80613 39911
2279 25513 43426 24606 29101 32028 29705 46151 36980 39348 12744 57552 39386 39465 38217 40773 49795 32400 42366
2280 6627 24148 5357 45124
2281 5280 27551 374 8842 427 6549
2282 29469 35019 33311 13001 23359 10321 12371 13047 29964 91384
2283 32522 42386 42753 27175 694 75
2284 34932 25211 8708 31116 5433
2285 59903 1806 6905 8322 5615 5476 29606 26529 5375
2286 12517 26346 6356 36172 7087 26347 74406 70661 42099 1866 26954 1297 4956 56026 71785 40836 30169 24423 52519 53229 57099 28442 59 27028 26287 6341 6303 12624 45876 12044 50765 34702
2287 5950 24842 38278 3045 24110 28461
2288 10147 41494 8363 4571 10734 11532 30772 2281 28887 40780 3823 7760 42321 40926 38220 12656
2289 53168 39779 66681 42831 73348 56117 83753 4880 72144 78061 80142 45204 54183 56657 63091 56659 63217 42219 44089 41824
2290 1361 24884 43307 29971 31649 1063 41287 4548
2291 5838 22186 164 7479 31657 36565 37776 24023 5684 1235 1539 33553 46323 8424
2292 2178 33773 3911 7727 30448 27774 26730
2293 34460 48340 1425 10927 5461
2294 87389 50461 22840 88702 25050
2295 24222 24224 24226 24227 11483 7178 31371 24228 28079 31372 5679 30097 2563 30766 31373 31375 31374
2296 37722 48714 61538 16462 74053 5966 6238 24686 24733 13068 5655 28572
2297 4685 23628 29716 2440 6889 7891 21996 9368 42110 37558 48312 34684 81907 27072 35651 23531 87875 57160 7856 22046 93 104 5690 1075 1746 17 38424 22987 99 43 38 149 62 76 7212
2298 28980 9061 28973 1493 34091
2299 38783 46310 27067 42410 72505 48312 47635 40682 40677 60887 32393 39987 81631 35927 87875 40416 62214 46585 84459 39710 32391
2300 29000 172 153 34253 150 154 186
2301 29856 40135 39600 57807 61181 7959 38294 71514 23501 77058 87093 24149 38072 24150 11279
2302 64943 45051 58180 57894 79409 63453 64291 62082 40495 28205 57875 62492 63133 64298 69751 90290 77198 89610 88335 77109 81066 10982 7818 11272 6442 7827 11262 11214 10978 8099 7821 11263 6443 7824 10977 7800 7801 11218 149 7811 12122 7812 12126
2303 23216 9191 26593 24721 32023 21649 46002
2304 33790 14553 42533 666 8941 12619 680 23788 36609 1737 11901
2305 390 12894 27167 4940 6449 1237 6085 30051 12900 14712 3878 1031 6344 5012 6347 29405 594 277 8263 1121 1626 2105 1698 1661 12469 164 6499 21606 23187 10799
2306 52037 39876 48138 62 9056 13401 26021 33841 5434
2307 6387 28299 31774 11878 2177 38923 6523 8261
2308 3481 40950 51272 23662 11389 62984
2309 1443 432 5725 29891 26485
2310 25400 24928 1650 1706 41858
2311 3654 4649 47841 34887 42407 11449 22278 22285
2312 11532 4653 7227 3177 1409 22086 1029 35668 42434 51659 36621 41135 50539 28532 28526 37675 8457 31721 7726 23697
2313 39441 60089 38329 40772 7004
2314 23017 1410 7725 1809 26641
2315 42258 48353 55459 26878 29285
2316 23747 373 10866 57 43 6918
2317 1260 4758 13006 10740 4765 33211 39275 28628 12837 26962 6494 34592 26340 11561 20712 28557 906 36262
2318 60725 27946 53681 38603 27884 27899 9042 41256 28794 27949 41259 34247 54846 27941 49000 45488 27929 29639 7522 42684 53786 27950 27978
2319 31365 38587 23972 427 5445 27138
2320 28644 89044 50539 50651 36573 6338 6339 30517 5727 6553 9645 28496 32925 6381 28126 1885
2321 203 8210 39469 43720 55077 4330 46239 39910 50181 73650 83335
2322 7274 23301 32793 374 7845 12217 1926 41530 6906 10156 31021 6627 5945 6603
2323 8442 28445 35074 28904 7726 728 31504 8292 26473 28673
2324 48088 5863 917 29474 11801 12646 22213 26759
2325 9174 42591 27308 30494 24347
2326 6061 22128 32729 32584 978 5654 1775 34023 28069 691 10160 1792 5659 1356 621 2521 1713 10706 975 1692 102 26593 31601 10707 1195
2327 7220 7156 28519 12213 1133 613
2328 12334 5736 8322 6549 5413 6983 6333 5481
2329 22567 39712 48090 12840 9022 40124 40021 42396
2330 33686 8409 5987 39701 1866 45700 36538 35319 5650 51297 42386 10905 75918 8082 40102 39690 10074 68804 53816 32522 7633 86732 22361 9260 60451
2331 45285 45583 10159 34616 388 10861 7740 8466
2332 1584 7775 24860 7239 32912 7244 26736
2333 4014 23804 79874 38131 28272 52671 57022 36946 1717 24683 5703
2334 11847 10909 40210 56653 44943 40255 56306 11868 42367 40678 57985 32401 73188
2335 23037 23049 6521 29793 6522
2336 31061 5672 32481 22965 26612 28254
2337 7519 7397 24027 4591 596 1444 12036 413
2338 8958 3534 6902 15152 24994 4209 8190
2339 23838 22992 23106 12334 29628 5101 24778 31620 5370 30476
2340 48262 8269 11530 24628 1329 44364 72633 13072 37022 395 6299
2341 3159 669 34340 24457 8110 44764
2342 56552 39694 32082 46252 31013 46972 33322
2343 12857 9787 104 2070 387 1031 9638 10519
2344 8734 8730 1140 4493 9499 13417 6668 22084 8682 11028 47060 11043 9896 3534 4282 8208 3388 18209 19921 8165 9914 46956 1513 9662 6867 20350 9811 5117 42393 32462 32386 16925 13972 14486 20696 27068 1510 42232 31179 7591 7472
2345 78328 50181 13042 11843 7471
2346 894 28418 4867 14904 673 29210 33315 651 4086
2347 25162 982 527 11202 11626
2348 42455 55700 55701 55717 64796 65563 44503 37927 80755 44504 58135 67363 10420 74675 22887 58138 40128 58136 81126 81128 58141 59369 61186 72185 81133 90915 62424 88563 61410 81131 58126 46005 81130 88499
2349 7405 1363 660 37442 28951 10170
2350 11000 10981 25588 38885 27218
2351 8256 22995 17 10950 8323
2352 24153 4988 37954 4337 23885
2353 36679 39808 40148 39188 8356 69704 82045 91557 85883
2354 7791 1690 27740 13 4061 36573 38109 26059 12334
2355 24194 54089 18110 55937 23170 45152 43018 38665 44837 46900 54712 73037 28644
2356 29223 11441 45490 8876 34456 36594
2357 29279 41478 3180 4681 3447 27798 7288 36061
2358 68788 72368 79174 21305 85812 54460 57581
2359 35216 8854 8826 31913
2360 6920 74 22064 7816 27723 22050 22032 183 46381 32905 38998 34249 8381 27722 7817 7202
2361 4262 35716 7041 35713 51782 20086 29015 52724
2362 3420 5052 24946 35714 30183 5420
2363 42401 15512 38291 46029 3049 16131 59745 35377 16246 46030 19610
2364 7331 15186 12378 12379 12403 12415
2365 27664 34098 37565 183 278 5590 27369 33136 9091
2366 19156 31934 530 43493 19210 24550 19081 18082 18582 9449 19782 48701 20688 50892 56795 10541 18612 19604 47167 19500 61694 69057 51802 2598 20847 3117 78202 10138 37682 33848 2818
2367 9065 9162 6946 27933 27934 7028 9071 32452 21764 29744
2368 18098 43042 8274 32860 2136
2369 2027 51931 51584 51583 51590 73856 80639 83371 64913 67647 88906 71754 64916 51594 37887 71746 84063 89643 26554 78889 88355 76201 74886 89592 21760 157 11267
2370 2404 9989 30083 2733 7344 37139 37435 30088 11682 5331 27783
2371 8506 9984 27187 1911 27172 10241 29300 344 220 32272 30766 36566
2372 10660 57149 39466 7891 32879 5190 26922 39545 7906 6246 31667 22610 29148 9014 9018 49608 53599 32530 7924 29183 12840 32800 31609 7932 40729 25049 33722 34135 34613 22975 9012 40021 36646 2379 78317 12485 35887 3284 1285 1774 11867 24140 42101 1352
2373 24776 4816 4870 6313 31943 24767 42238 21934 6273 25048
2374 119 38 25144 29665 38587 66 1383 7202 39073 38258
2375 23029 1051 24057 1206 32197 7850 2599 23035 11456 3351 1474 6457 9174 34006 1642 29848 1181 4703 6380 7343 9411 23032 6134 7344 43122 27058 27070 90197 12165 6657 7406
2376 23937 34612 29940 39371 30995 39395 23635 61224 39714 39483 9009 39623 10668 33441 39663 39717 79170 31569 33493 39586 29153 45470 39653 9044 24208 37941 23992 28922 30658 5448 29790 30297 8887 93 40683 10845 42399 31412 34082 25222 13710 25144 33850 31337 24272 21478 32354
2377 1494 2842 26711 1425 10866
2378 65707 46597 43608 70053 34755 90711
2379 43847 9805 18993 19102 16751 15476 17227 16297 1639 18629 19470 27631 956 11085 24772 4447 27221 8632 12753 16763 19343 20065 8633 6228 19777 3352 24340 6334 45776 3534 12647 36938 43039 49631 8621 8232 62114 61143 36910 63139 899 44662 18908 63604 44868 1578 42872 47389 4776 20424 46503 45938 22167 906 14894 18143 54856 8246 21384 55521 9003 55522 47075 59319 21259 42861 40407 21157 43759 50582 11141 52624 67722 43198 32753 40491 8318 46746 26754 28296 51860 3576 72 54457 39958 64601 11868 82181 36358
2380 20304 42703 40957 46 77243 15129 6884 46965
2381 62425 35378 58070 60245 8072 22623 10948
2382 15475 72246 9209 19703 69311 60420 10534 61837
2383 8163 4652 8804 2691 5094 36257 28467 2605 15313 2675 34861 2699 8161 15265 6123 2788 50104 2669 29733 4661 26904 54937 5320 2751 2701 9999 6376 2744 41177 27766 6467 2702 2745 48200 28895 42026 35134 6091 32075 25468 15407 53463 2644 9995 12935 3456 27242 38861 22158 2739 2784 11348 29051 9001 12252 32968 1134 1135 11450 11405 27875 9175 2673 8414 15483 15492 31563 15410 32827 9854 15246 6357 2814 23863 10229 9849 44902 4657 2882 34677 38123 40318 5325 690 12521 2646 23315 15540 10245 10228 33928 2219 12064 1808 8164 11406 7346 11397 2889 2805 7329 23704 36999 3567 11322 31188 8413 31192 5559 4197 3654 36857 25114 47643 36082 27817 26144 8337 26653 29706 64373 8396 24931 51846 46043
2384 40395 22667 11538 40400 6211 12742 49055 766 26955 48707 22560 22574 39433 22581 22517 24668 32203 42889 22569 36424 22640 39573 25458 7329 39639 33247 22708 22668 4166 2490 39895 40072 76724 22862 38981 34394 47773 59879 11864 12497 8801 4795 5741 6917 656 11312 26746 24210 43996 35074 1919
2385 41317 5030 2363 9456 41872 1181 24639 3824 23117
2386 6027 4818 12451 14812 7330 11049 1423 37667 13061 11932 28418 27780
2387 22200 21816 1441 6880 172 5385 44094 33452 50192 32062 8409 39654 50197 42481 21820 32066 41556 12586 61181 28963 45866 8746 22261 55594 62546 59659
2388 23919 42203 55167 7489 34606
2389 18198 19655 20698 42861 13160 19466 34714 11136 28810
2390 520 566 1705 26587 31223 21807
2391 12833 20148 38814 22476 39838 21471
2392 37925 55922 39797 11191 63335 84745 4956 8354
2393 1136 3300 50777 60441
2394 30673 447 4898 35937 4107 1644
2395 23032 7331 41029 33741 7199 24891
2396 38851 5807 27673 32026 23116 7732 34618
2397 36444 48420 20328 33840
2398 12206 25407 35587 8361 39254 1553 21474 2100
2399 1374 72770 76867 17657 27897 46202 51251 42553 45124
2400 63769 53243 66604 46043 89856 69576 36361
2401 118 23648 27274 1663 10875 8860 21663 7332 5304 890 34795 24166 3 36779 8495 16763 7045 29597 11963 1899 15027 11964 11965
2402 51267 39985 40235 5319 29307 1234 35812 10768 1496
2403 34843 12296 24701 53053 4209 29743 3825 3177 28997 18671 54355 62749 5790 6722 6773 18587 3392 23513 18578 17911 1227 35191 23510 52412 3815 40613 73822 1632 27824 3510 47022 21910 39272 4367 5245 19934 19206 19794 11743 1916 3564 8886 34838 27913
2404 16939 12606 18109 9231 10826
2405 8023 21836 21831 2134 2320 26782
2406 20529 74870 20764 78769 45052 21293 21236 21152 21161 21292 21189 21099 20862 21311 23936 21354 21439 21308 76920 43827 49595 27405 38968 49581 43830 38533 41575 41574 38970 67143 48771 43831 68045 83850 71562 56411 57535 79129 73168 86627 71690 27431 59548 74536 39749 83569 69200 73711 69062 60446 69366 68511 68500 65338 78452 79289 61048 79769 68510 76585 79291 71812 31306 86668 85559 54163 68348 72369 69902 64765 68357 72091 62709 57588 88415 81720 61157 74019 89436 85351 69081 59808 89250 89499 33497 62707
2407 44660 31824 58395 46254 48310 21563 31917 944 44983 42590 40229 38252 80865 743 42658 26473 7190
2408 24061 5110 32964 26803
2409 38488 55745 47462 50378 12096 41427 42865 3728 3458 30067 23492 41591 6817 4857 4519 3150 49778 51494 13025 59041 43100 57272 74406
2410 1924 76 5597 5606 7406 655
2411 21628 11913 15882 41459 36156 24505 1389 1793
2412 12374 6731 27173 23038 29797 29798 4089 29808
2413 4839 43773 28578 435
2414 39708 40150 51301 39969 28205 36319 86277 80830 40190 37421 35567 49160 43042 62416 50538 40240 35063 82184 47165 89349 6909
2415 10822 31785 29361 28460 26540
2416 50950 414 27684 9907 12329 10788 47940 14512 7875 123 6780 6932 25060 8716 27702 8970 72 7410 1264 25231 13459 19864 57581
2417 38329 11869 32624 28450 8323 28405 6815 23106 3481
2418 6827 11651 1063 5466 52412 28831
2419 21953 8529 15424 1015 8040
2420 5606 119 5435 1013
2421 42573 104 93 6920 62 10826 114 29090
2422 26175 45352 3237 31598 37324 12674 28938 5540 31350 21843 3841 22404 46619 29499 24070 30859 7095 4721 38804 26928 18403 12804 43027 4294 41492 32797 29736 7475 889 1229 11324 18389 48081 29570 9473 19361 17644 10134 12723 46238 12371 36426 33865 23611 7891 33442 4770 30272 10131 77573 7932 2134 25157
2423 36432 18885 20068 36548 50365
2424 10379 30825 39399 31725 10118 11819 33699 22819 50339 39479 32052 6261 30997 39588 30995 37547 23622 10399 37355 39542 43399 39525 32761 37409 35886 29171 43763 30996 31709 35348 39840 36272 39618 41651 21594 32619 39628 45804 39594 40660 39774 11615 11610 29952 36276 31713 39944 43052 39691 39765 7928 32065 10344 80402 39732 39735 39838 32390 40114 39517 42215 29958 35563 39493 39795 39975 42015 39931 32069 39622 39132 7949 39597 29195 48605 11575 40066 59660 64601 40175 42222 40200 57971 42367 78750 36888 62984 35565 21592 29202 57284 29966 53721 7968 47250 37421 34145 71804 44918 26692 65540 31711
2425 8344 750 11376 164 32778 1010 35109
2426 5405 8739 29637 24236 11873 6618
2427 5818 30697 12478 22983 6340 7250 696 10409 29389
2428 8192 3368 37374 31669 203 7478 22313 137 3389 5258 987 5615
2429 42411 7427 27368 1972 374 29370
2430 56918 71842 42366 1919 11372
2431 7339 7320 2834 6134 2805 2555 23346 29061 9293 30341 33774 45769 36006
2432 27431 39890 39886 39889 39928 29174 39971 36285 39924 39974 39967 40043 39973 40053 35063 39896 40063 36737 56310 39820 27429 11176 11184 40195 40128 40157 40146 40218 40220 11195 40219 57876 45122 66973 40129 62979 59210 39747 33489 43460 11179 64084 41904 28815 40126 43700
2433 7272 27075 574 559 24079 746 2110 4815 34402 26751 5182 12121 34448 32210 1465
2434 38415 7098 40407 50564 34601 46184 865 40294 27346 39571 36719 38184 39631 34609 34611 56305 29167 36737 45868 55109 69103 29212
2435 7181 5094 2613 11583 4582 26316 44039 50107 26814
2436 20020 20220 19768 20239 43559 47664 71959
2437 11661 17 5590 93 28110 278
2438 43765 11556 11430 11483 48214 2604 32344 31256 11544 11393 43763 36212 36217 7971 83534
2439 34379 42586 28909 9300 32082 35682 921 45467 50759 43362 30772 31704 10660 50347 51264 30407 46769 25424 38963
2440 8344 6000 4925 22089 37789 1573 13575
2441 29848 1669 24202 1124 29516
2442 39957 39390 57972 40172 37424 7954 59660 73495 40249 38981 7952 72095 78750 43531 32624 91555 89260 42261
2443 38938 21625 2413 25335 12897 36528 6932 7755 13048 1337 73428 32522 30375 7891
2444 41198 10300 20324 2549 38557 40748 39402 12847 33047 26350 7085 70653 25511 35266
2445 16953 17230 17174 17149 17182 39119 27982 16 60372 41547 8662 8655 7005 27929 36100 7567 31958 31088
2446 2914 15013 15758 3875 36669 4839 14906 28990 55815 53795 27121
2447 13795 6752 13868 6571 6636 6765 6622 15999
2448 43338 9892 4262 18049 6049
2449 44536 25513 33047 37496 26718 25216
2450 28741 28752 35780 28800 61289 63776 7042 38535 34297
2451 28457 8526 7760 30349 7770
2452 32460 9058 29642 29761 467 6963 28927 6956 21894
2453 8322 5440 43808 12268 129
2454 1376 24770 5618 23037 5096 43279 33128 6522
2455 4740 31053 34873 26963 37337 33220 42098 167 6085 1332 5796 8951 42409 42031 52350 27822 26981 46011 33452 44399 1720
2456 316 2800 1252 12794 26938 8520 18212 7471 5784 30296 5859 113 36056 8984 18359 13017 26187 5011 1049 22173
2457 32689 5097 47161 46585 76514 32015
2458 29258 26160 10932 662 34925
2459 2619 32047 44941 27065 30376 46500 40782 85417 40069 46613 42254 84746 90440 40094 11542 27072 8090
2460 662 5966 8575 9490 44064 33573 4892 6246 596 7215 7216 23514 26532 11827 10314 28559 85417 45367 87339
2461 4779 27291 33967 33012 41477 33164 27517 1094 41287
2462 11936 44331 1729 660 33195 2374 10712 780 4610
2463 40156 39938 39873 36285 46564 40241 38201 11172 51301 46888 39849 10913 33795 63738 33506 40986 40240 91200
2464 83777 86948 61593 81409 44229 55592 81122 81993
2465 1444 12279 29847 12165 7504 1123 1098 27183
2466 64 13525 196 171 22055 7196 188 24212 7167 12607 31290
2467 36100 8633 6665 33841 40807 21483 9057 10877
2468 12637 27300 34517 45430 42858 34741 55897 22651 42478 65809 39190 52674 2973 40082 46991 3147 46993 51289 49162
2469 66037 36170 60293 50611 50613 53424
2470 37634 1547 4789 36289 34064
2471 5736 6338 23826 6359 28147 55068 9561
2472 23269 39235 23265 21506 13060 27727
2473 240 175 30145 9014 35060 8270 37496 31748 33715 36272 57092 42121 73183 36128 11848 42982 22497 29016 1094 8833 1688
2474 5106 40370 12236 5279 5184 11932 59910 35939
2475 2832 13 6792 1574 7711 5207 836 52327 27718
2476 90 55 5654 74 6918
2477 7879 6584 42128 14 21842 9062 26880
2478 29925 36278 10576 6246 11824 39764 46811 32530 10662 39926 10130 33463 33722 31717 11858 40213 37426 46564 40214 52682 42525 40039 59380 73190 35497 82159 37528 56419 24416 29362
2479 10674 45282 45327 32619 32427 22307 46185 41007 22457 39885 39989 25520 39812 39811 39784 39849 39853 23941 7940 40029 22842 40113 45866 51301 40255 29969 40061 34020 29214 40110 7970 32623 89815 39833 12345 23716 36432
2480 23429 21476 22029 23424 23427
2481 39806 56337 7311 39515 37429 57583 79999 39914 83556 53233 32409 36895 56329 59592 63136
2482 44434 44436 44445 11893 12524 52642 894 49827 24171
2483 23186 7390 12876 7143 26473 1924 728
2484 670 1383 36006 49 397
2485 10831 732 10955 24258 12184
2486 5918 6173 35682 3663 49612 44659 48342 27069 42525 42820 10148 28910 1163 5946
2487 26472 22786 51276 60881 3405 43964 22785 40212 39992 40074 35059 35564 7950 11176 22929 22864 4059 40167 38327 7964 73495 39940 40071 28620 47640 89336 42718 86732 39956 40102 41890 36903 29760 67330
2488 38190 41199 46877 60984 23282 47762 40990 32565 28345 53513 42366
2489 973 13197 12503 12865 13719 23146 12853
2490 18077 86707 31943 39236 24767
2491 54899 42912 42562 42202 80034 1370 2313 83628 6546 40528 5444 34442 31516
2492 7505 118 9 353 5306
2493 15940 20005 29268 6669 30247 6666 566
2494 41262 11821 15199 31165 769 22015 40491 52463 33479 16 12395 30810
2495 57 6904 40475 154 166 172 27940 186 34224 31312 27927 34919 47108 7028 6413
2496 32570 1919 23830 25297 34442
2497 12352 3234 166 29366 11279 1603
2498 47843 31895 32268 11312 5679 24484
2499 8729 24907 34827 5654 47
2500 45893 54787 67227 21783
2501 23839 51529 43316 5546 23838 42023 8408 42640 11592 8447 10165 31020 10146 33759 8269 35198 28425 5543 5556 11566 46584 9023 24643 34109
2502 3669 8208 18251 3574 35430 15313 18178 12692 23521 22979 26145 23607 12934
2503 20001 12358 30913 29486 10576 20306 13015 20318 22223 24606 7091 20324 30549 6176 10605 55595 20718 29919 6179 33411 40712 42330 35844 33687 22287 10347 22490 5115 43863 13034 17 12797 24647 6223 33869 33418 7891 21132 13042 28559 10639 12843 35805 55889 51639 41883 13046 38482 33709 12845 50550 46785 31710 56013 31173 10591 26981 7849 30200 24193 32530 46205 35370 29952 42040 39846 76767 12454 36641 12839 35564 40993 75006 38393 11196 33793 73865 29183 7964 12586 82154 35498 81930 30248 72639 82159 82156
2504 758 39056 22235 1787 1744 8512 41534 33060 26251 45088 2733 1453 38179 9268
2505 21642 8302 49077 49150 30316
2506 2259 10319 7891 46762 39033 59010 52473 13048 42524
2507 13003 6193 65358 28561 36265 13023 12279 37489 26340
2508 36596 3448 9351 7479 10939 2314 7854 2133
2509 4493 1537 5615 28290 10444 987 5614 10441 12418 29366 6692 21959
2510 23013 671 987 12320 31232
2511 19446 12256 46516 10514 42914 27743
2512 51067 9495 18754 20350 20713 49511 21249 55779 7866 59540
2513 11941 21471 43035 28186 33957 8261 1798
2514 33804 16112 7710 36906 47242 31094 16691 16958 27372 17245
2515 26739 8404 8261 6549 23770 22072
2516 40283 32015 4758 37116 62255 33394 52355 24561 36136 53634 53180 8269 46910 50691 6490 9297 26617 32082 44763 21261 31156 73227 66370 53346 26504 48347 66716 54455 38330 22918 62416 49161 91261 23646 10706 8850
2517 22277 19840 42455 33533 10072 40653 39416 36272 39608 39578 3246 56640 11830 42481 40993 71258 8696 33483
2518 40072 43804 7746 527 26846 6801 38768 50243 8774 28919 1104
2519 25261 21769 31960 6949 9074
2520 20487 24947 19286 12816 25112 9481 21155 26491 23618 11821
2521 5520 6056 33736 22114 740 6467
2522 26072 8747 6589 30532 24802 9057 5762 12418 24764 34920 8741 24912 28977 21842 6590 23787
2523 77367 66876 85785 61368 86566 44205 56376 76588 47689 60210 48840 42738 50670 79455 57879 46375
2524 19440 23773 782 2695 7350 5615 5622 24448 29838 24563 13092 15999 33824 43894 25147 28159 646 1641 8183 5102 23499 17642 37450 1500 24098 12985 46717 30826 18935 59839 1212 25026 33941 7408
2525 1240 24665 5323 49077 57907 29202 55037 33366
2526 6927 7228 32483 6618 6617
2527 71530 68744 24194 43254 41824
2528 23909 5724 30002 7224 28316
2529 33075 1838 3526 3542 50890 21543 22219
2530 6337 5727 28140 6381 5198 5340 13097 21604 24142 7725 26512 6553 26511 7504 8391 11948 36999 33009 23187 23195 8322 28587 8373 27917 5201 1707 23427 8340 23701 1792 33127 6338 5416 4956 28126 395 36040 47698 11929 6359
2531 65281 62956 80084 47383 80085 30489
2532 1252 12794 11051 28344 18402 18442 28315
2533 46517 3744 13087 49833 40335 9694 7504 23153 7495 25128 30314 8884 379 1806 6387
2534 31519 12006 4594 24031 13750
2535 35687 37510 13686 7500
2536 9451 21565 5816 32530 73998 8322 5481 30504 30508
2537 28910 13004 32339 8408 28905 7155 652 43076 7168 33220 1038 26484
2538 21135 6181 6530 23625 20853 23637 18123 34441 7939 23208 16265 12371 57288 14090 9492 20418 33418 29967 87462 6544 26888 8404 10146 27802 38204 34254
2539 59089 26253 44107 24643 40943 4340 41208 48353 39948 51279 45350 48347
2540 3110 25036 36901 36774 6645 6830 9443 11708 87955
2541 35888 29022 11331 24417 10706 27797 7148
2542 23200 20958 23569 27448 38420 22293 22297 29927 23020 32379 54307 10639 30230 38487 32526 10591 11837 10662 32390 30875 40677 33964 35564 31715 37434 44104 11871 35574 24946 35585 11308 5468 1647 22984 604 1428 22965 5963
2543 53956 80450 73433 10388
2544 29602 33430 40870 22291 27857 26739 6060 5986 23000 23954 27917 5489 32964 5482 10689 21641 5190 35966 26492
2545 57156 673 46890 39968 63686 55003 43698 43626 39743 11175 39886 71779 39173 69080 43700 54464 40219 39792 44103 35357 42490 73358 59808 90797 73359 6663 8322 8338 10952 5413 5457 9054
2546 12780 51227 84196 46185 27423 33247 39680 3145 40411 83592 82126 40238 39855 59367 59374 79361 50644
2547 39687 73964 21594 1326 8936 39589 36701 39797 50709 32060 39114 40110 45121 38201 35564 40228 64758 50650 29190 43770 59384 45581 33505 33641 90220 36815
2548 62191 48304 59064 68995 67220 78700 79284 55760 68758 63944 75138 11136 79287 56342 60308 36402 65210 48308 49652 65807 53328 74309 57982 76830 91406 30500 7045 30496 30390 1535 8792
2549 956 10829 621 6528 29000
2550 45291 8890 1014 38468 9315
2551 51804 44430 26939 6719 44733 55639
2552 61970 80720 70702 39691 43763 40048 38981 22590 40165 40135 26459 35098 22939 66370 73934 40254 7949 22807 51765 32396 59661 80005 64181 64176 22740 16545 44943
2553 26097 12671 42516 27432 39042 39992 40034
2554 33134 55 31319 10824 32279 41477 37071
2555 1694 18705 11663 6990 7786 23706 45490 42023 6299 4793 5727 21526 696 35954 700 10409
2556 13164 12615 49029 24681 6262 21792 28267 5703 28266 28854 24898 32593
2557 10386 41005 55049 11842 37407 40728 41853 43578 22691 42252 36286 40062 40137 7936 40596 12372 55796 42395 59383 37369 33735
2558 49176 25745 25787 25791 25686
2559 27875 2817 7324 4647 7330 5546 28862
2560 2868 22965 8213 7371 21622 8854 29880 396 23080 42290 5481
2561 26636 7835 8462 10854 26305 407 1078 23771 54771 35079 29285 1924 1432 32158 28438 34453
2562 43180 41587 9061 1024 29327 33978 29328 36951 5111
2563 1325 10830 7311 47927 11575 61932 12841 61227 21970 11611 25019 11613 10401 11151 43451 30962 46811 39981 39997 9023 46556 84164 27058 62982 40308 35569 23256
2564 22378 18124 31735 51484 5227 26952 4760 30346 41994
2565 34208 34146 28285 41859 30774
2566 51646 28330 73671 46785 8422 76382 27823 12410 11315 187 1098 3229 17 22872 40368 2441 87677 37434 32544 31828 37694 5668 23181 23972 43446 9568 34154 1649 661 24816 24817 24818
2567 18597 36967 5866 18788 44477 45477 42082 32982 8221 894 32446 36671 5259 22257 926 5902 29210 42246 34353 27353 39301 36557 35552 39382 36559 45207 39464 29148 1907 11151 50469 44322 41005 40017 51293 46904 35450 31162
2568 995 9817 14663 13769 1031 14085 7545 34934 27552 15294 215 27598 27543 10228 49183 5590 52 418 278
2569 28440 30264 46776 31498 27774 11298 11307 27747
2570 26192 13962 38080 3389 36205 24492 10724 28597 27568 3468 12671 3452 23673 17277 6146 44507 7788 7050 12788 23456 21949 40834 37387
2571 26209 13056 3196 39769 11848
2572 55462 32393 40204 42018 29966 32565 22886 29970 44105 35452 43459 74551 33506
2573 58274 50837 81912 63880 45818 23897
2574 39317 26502 23993 11334
2575 8970 5845 11060 36967 27066 38193 25510
2576 43077 31089 46880 42203 23703
2577 67562 12759 10942 30352
2578 25168 24382 8781 34334 24151 23268
2579 50742 26210 77169 1269 41824 21839
2580 7701 14736 16073 6950 40474 61140 10662 24285 21818 292 27496 5087 22041 18153 1607 16045 12 7835 10847 17
2581 51754 37607 41631 19930 56862 45909 27041 43241 68222 545 13013 43433 33109 23169 33110 39193 7704 30751 20781 6269 35787
2582 5375 24950 24904 615
2583 41600 1123 1205 5489 8462 3221 27442 31238 45609
2584 7891 7716 33720 28880 5097 91539 89
2585 21977 24844 5182 24869 20977
2586 29382 36102 58077 12413 28288 5616 40715 23710 8070 41859 26240
2587 1647 5507 33913 15066 10483 30130
2588 49737 11857 44427 88849 48848
2589 5736 29863 24445 10160 1561 34068 5281 26754 28296 36993 10861
2590 42018 33483 1497 63335
2591 24707 23807 1548 32584 8290 38831
2592 3294 24193 39820 40142 40164 33793 29195 11858 37422 59387 70539 59599 57867 35498 90557
2593 3540 33984 33015 30905 69658
2594 50374 6811 25472 28408 28405
2595 23999 34450 26486 40421 45490
2596 57606 39802 39886 40043 38723 39934 33489 74782 82846 64908 34236 43626 20622 4655 67721 83004 41579 53856 58730 90859 84448 69080 3385
2597 938 39448 48981 40826 39468 29141 39469 39466 10402 39542 39770 11830 11143 39599 35343 39669 39552 26460 36272 11829 32693 11156 11831 37409 39544 32059 11161 11149 11840 7899 39619 11832 39589 29153 35886 33493 39613 39477 31569 33436 39587 33546 29149 33704 39582 32767 376 150 1379 9321 1014 78
2598 33157 6927 6918 8732 1365 1371
2599 2547 2733 24113 35601 11781 22366 32097 4132 26851 41636 26867 40505 44925 9252 10687
2600 149 10985 11271 7797 7793 7818
2601 47396 1635 37114 10156
2602 14956 8192 73027 71967 60698
2603 13223 21791 24964 6961
2604 28773 7531 9051 9055 34293 9054 567 27935 29679 31073 7522 50410 30508 3566 9059 35934 60821 9062 37739 10877 14200 5434
2605 1664 23046 1123 8326 8837 6530
2606 4948 6978 8322 33909 23446 23441 35578 6983
2607 12872 24128 4547 12365 18972 19138 36405 19540 40664 19901 20634 8241 33412 51769
2608 72399 29593 45957 80905 54987 52089 55401 33263
2609 19848 27315 62549 20913 17549 50494
2610 1827 28588 9358 33767 7243 5343 44193 45582 1651 1063 26784 9007 1916 38799 37949
2611 16511 16343 29649 49272 9768 16872 16888 16606 16725 16951 16663 17168 17621 16936 17838 18004 16911 18572 17772 18900 18548 18752 19254 17285 28034 19560 4125 43910 18139 21001 69330 29698
2612 8755 29883 23013 26059 8101
2613 19445 45478 49008 5258 55099 10111 45479 6904 25144
2614 12036 40423 36337 12464
2615 35482 84394 59604 78456 57125 80905 9521 71305 33657 57127 26773 27051 26713 24726 29093 38288 29702
2616 50303 13004 13032 13049 34889 41789 56999 46764 41786 43438
2617 44392 8910 4674 41508 7939 47713
2618 33919 35449 32427 50650 52083 13211 6545 33011 11720 31355 29225 34452
2619 54307 1343 1819 49608 35350 32384 34683 21597 12030 40682 39987 39846 40993 22726 40070 48605 32393 29967 29184 32399 32398 59368 42719 82182 91378 37430
2620 8520 42352 51602 66598 84038
2621 8212 6253 40871 33448 52641 16198
2622 8836 8512 21737 105 21 7228 1353
2623 3244 240 47428 47116 70361
2624 9570 23340 424 6591 8671 6771 8820 13253 23270 30261
2625 91550 62961 91551
2626 41468 28074 38395 23823 28093 6160 24358 34071 43326 8325 23781 29614
2627 34641 23355 64764 75122
2628 6646 35136 6364 6061 7170 4598 6349 1916 6395 1746 11414 5735 1815 9233 10722 1834 23567 1836 27716
2629 10677 31019 1113 8387 42108 23200
2630 32562 8267 43495 10834 196 25129 31527
2631 53723 10384 55245 36273 41199 7892 32005 46308 37496 21579 6243 33698 44307 39482 11148 39653 25510 40727 39586 39494 10396 39617 390 33715 39807 83457 45188 11156
2632 26540 32864 12017 7496 3551 10847 26533 11191 32171
2633 35437 8268 12367 7891 33020 29755
2634 35675 26729 74 8826 975
2635 65546 46768 10622 34777 34654 57102 33793
2636 24511 1537 11798 19338 5187 45578 31482 45616 36499
2637 18010 4148 49072 20907 53819 19265 18703 12294
2638 43607 26239 40683 374 6666
2639 11027 14515 8693 31797 47232 15793 35586 9056 27369
2640 967 7390 5342 10061 133
2641 26589 603 8825 551 27109 33366
2642 8798 171 23415 439 5438 2800 12525
2643 1550 32217 27131 27164 23061 30316 30381 24687 10061
2644 41663 6079 37582 36400 2547 2497 7337 2697 30491 8927 45959 26648 41872 1174 12780 10722
2645 29958 43124 42017 31715 22872 48605 68090 26210 71104 38991 54442 36883 29965 11868 7962 45263 28644 44467 29970 30232 66167 44104 47250 76091 62218 71276 89262 44103 35576 30962 9350 8345 28165 5941
2646 30262 6115 32190 31067 16793 36380 21515 14638 9702 21677 16373 16245 4886 24940 9941 9821 26497 5101 432 17244 15805 3518 12669 2112 684 14901 15460 12586 27232 16283 27240 4707 37030 31134 9925 13910 14598 45796 12442 16246 32954 26809 2733 31904 9680 38524 9765 2800 4857 4596 22067 18411 30098 47022 5115 975 2691 16934 18685 4134 6885 25171 15102 31031 2400 3537 23373 3233 6815 40841 8267 32582 30049 12371 20176 21952 33075 16823 5761 20488 9899 3633 21108 18718 45206 19681 60184 7087 21641
2647 2240 23675 2242 24077 30767 5531 4998 5102 9767 88 170 6043 5551 8557 220 9368 21837 22317 11651 641 14211 22150 8516 11872 12276 7330 27445 1165 1893 6066 7406 6128 14629 2683 23359 15281 10736 27131 1157 1849 24140 27535
2648 28458 6827 8338 6593 38856
2649 5597 10406 10452 27140 27099 23651 12423 8866 27711 2179 36050
2650 385 10452 21827 27696 6985
2651 56660 22794 3635 5761 44311
2652 6027 5899 2313 37523 2710 45201 55425 89033 21471 24775 28186 8367 1615
2653 4857 26996 4287 12711 41160 32339 35943 11566 23383 25376
2654 29688 34919 6429 31091 29258 25276 28813 40873
2655 85367 74166 82718 66063 41314 27569 86616 40000 81312 80859
2656 82919 60061 70507 88599 58926
2657 38836 746 1425 44702 21892 24452 40287 38319 26473
2658 8774 26347 32374 38975 38441 38840 33525 4051 34513 33174 38833
2659 39726 23643 40037 955 25385 43964 40100 29960 29964 11857 40241 11865 40272 60521 45121 52682 44467 39911 39872 83532 42367 42490 42485 36584 35452 11868 28644 26692 57295 56661 75660 52091 49164 32567 49165 91384
2660 39493 39669 39625 39553 34775 32394 39997 57984 37434 79364 32623 62983 89260 11175 36739 82012
2661 56802 62786 89074 89638 65625 68643 38236
2662 5615 30467 6518 23 191 24212
2663 3911 35096 10734 11681 3627 17073 4456 3825 27054 23616 9310 1672 24145 33000
2664 4815 1582 7153 11345 34167 7170 2487 36596 3043 7857 10816 11417 2746 551 28277 8323
2665 735 13442 20328 28582
2666 11999 29524 1606 28697 1539
2667 35189 54197 21949 30177
2668 42635 41173 31183 30943 11558 44603 2688 11430 45571 43076 10344 35096 57120 46789 41286 10701 3469 1496 775 38191 24203 32230 5987 7208 9416 27867 1465 36043 30034 623 87848 7243 4622 2733 48198 32231 7971 11312 38174
2669 20666 20486 44440 32934 14313 22979 43774 11862 56659 46830 33054 33051 33059
2670 949 36033 11776 67033 46448 53876 91509 89666 66099 28644 35060 59325 80257 85753 58272
2671 8746 32544 27060 63093 21800
2672 37778 43383 10113 23718 23917 34069 605 38203 1322 62201 41969 34679 26505 24669 38418 6984 32941 34380 26732 42138 664 403 1443 22309 27147 11627 8742 3353 10971 10151 27154 39250 48749 36326 46753 46755 9196 48909 32582 27308 3474 46310 49795 1503 35956 5252 52640 29161 55392 33985 27771 8058 4729 32193 49151 28938 1417 21831 52510
2673 29912 4331 7390 35977 9370 12575 8339 48067 42504 7209 42898 22188 22314 23384 9998 10145 24096 4255 7782 2169 4356 1655 1730 10092 30730 7208 23815 7378 11649 11653 12524 6539 1814 1041 23048 23733 44773 43392 36569 1235 23489 26964 33675 42015
2674 6525 5983 1608 1595 9205 31356 27215 8267 6929 6251 36301 8409 32906 23836 26985 4838 23138 37029 4554 37312 49135 47024 9021 72 11947 241
2675 7221 29321 25333 26776 22313
2676 5412 4598 995 1816 15277
2677 39913 63211 43402 39304 61996 40091 28204 57984 53225 61182 40230 90948 28211 11188
2678 33692 11827 34605 39420 39525 45804 33707 39765 34553 39501 44018 11167 32524 39389 12369 21602 39867 13047 39713 22646 39132 11164 43456 33461 35567 62217 40260 7966 90882 5594 55005 26219 38106 278 21905 6603
2679 40148 40071 57155 37413 39870 45868 50650 40022 11183 53978 66716 40026 40223 59353 40154 35567 39132 29963 39869 39234 40061 42259 35450 57981 46609
2680 6845 33466 64193 33714 41788 34135 43251 39473 26210 35057 70699 33699 16586 4007 7950 42037 28586 37 35090 40230 33715 68972 27720 35567 46888 57289 37563 71781 34952 69313 29171 78995 71804 40267 38828 46564 82156 91574 22037 10835
2681 39569 52330 39474 39441 3442 41199 39604 39616 35556 32564 41264 60014 40735 36721 35449 39708 44116 27423 41373 52732 42990 50191 42455 23643 77587 40046 40297 10903 46889 52680 51767 40251 59370 40985 59387 43802 55402 43626 35572 50644 89349
2682 53540 60103 8261 52463 62062 77461 33911
2683 25400 656 11941 7483 7472 11942 9051
2684 52156 90111 31718 9778 68804
2685 5471 34678 26747 28908 26787 5946 7227 7765 26579 7778 24998 7721
2686 61404 10337 82178 55247 44151
2687 55813 28904 89501 24093 24080 24087
2688 10365 47935 55030 2966 33722 22661 37563 3262 42522 7964
2689 23041 37488 23438 28561 1608 54904 42526 7224 187 527 23964 29541
2690 33738 6589 40425 14010
2691 53569 4737 26974 43040
2692 8353 3319 3172 6152 9699 31017 3326 3699 6302 17583 1140 33576 3987 6938 32302 17166 11798 6001 23371 3538 44366 49148 18894 34820 2965 18966 2510 4370 7259 26895 3633 4444 19558 19497 18328 8410 17751 12728 14682 3537 19562 7399 20906 21139 42213 52199 5799 41891 12693 63235 19278 47523 52438 64683 75900 15333 12371 35843 73626 11844 52070 39779 24831 58018 5678 54297 44452 73625 52452 3686 46828 58019 9851 28644 11794 4267 42216 53497 46996 42219 6219 87152 53498 83897 2659 78191 44420 949 33160 56394 38920 36297 31006 6366 11911 4948 430 17252 22997 5618 11873 36006
2693 31920 1838 46471 27067 21630 23642 42205
2694 27522 5579 40313 26473 6949
2695 33248 32736 34754 10384 53723 29869 8068 24007 36049 52796 25201 7206 429 23689 10937 23999 24120 6991 23891 57
2696 45799 31902 10348 52583 9292 4245 53347 50701 24641 32044 44364 1329 30943 10096 30807 45312 46471 34107 11617 31272 32004 10647 26432 8423 10701 41173 5322 38191 50327 39463 39505 11609 50182 41555 23622 39694 38449 39695 29948 32057 50924 50194 39984 42007 50484 51299 59657 7959 80004 39233 66717 42205 82012
2697 38265 1433 9344 7291 8428 12211 6084 6083 25470 31021 41340 5308
2698 29016 6823 12657 12658
2699 1595 6052 13964 633 11049 37521 44760 28697 40605
2700 29921 26254 21182 40791 40669 36734 42192 53474 23101 10632 43365 10634 6223 29929 10368 37475 6256 6216 5149 10677 6260 23622 42557 9016 32619 39896 40307 40021 44489 48605 62545 33964 32400
2701 21525 13575 8265 2726 13545 1595 12970 5643
2702 28438 26589 7277 9151
2703 5103 963 15007 16677 5604 11842 7410
2704 12775 23075 28133 36224 31656 10476 8257 22059
2705 8896 38951 1180 7896 1453 87875
2706 30792 39407 10402 32836 39619 50191 11156 22695 3657 3548 48218 42479 11151 26210 22777 11143 51860 11152 42017 33711 40017 51859 38251 40092 64758 42395 11181 40248 33505 80005 42365 32624 43531 35498 80603 59383
2707 15249 63523 13595 63470 30248 12064
2708 39641 46955 42257 28202 39812 3397 40014 23915 40092 10904 42482 3259 22885 40007 52681 40096 40238 22850 40245 26691 59383 43529 59370 79361 55402 3659 28212 82489 3199 81152 42530 89262 50644 3713 35572
2709 975 527 28227 4086 377
2710 38916 23637 33020 64702 33500 3489 83013
2711 8210 853 8984 20477 19068 27068 36285 35225 41029 181 12029
2712 1736 2749 22343 6073 12901 22093 103 7167 30514 28539 24216 1779 22349 388 167 40432 11 8471 28602 12619 40293 7190 975 681 1364 372
2713 7190 12312 10951 6918 11 28366 1752 29421 34374 10767 40952 7203 23650 17 418 721 132 22026 6914 10821 5466 24420 25 12 969 5 30 44 7539 22058 7546 440
2714 25257 8323 2070 15879 15884
2715 6918 24120 45 2 25424
2716 10899 32718 8194 11069 27386 18859 7062 36664 21419 11125 24653 40690 39576 11177 70914
2717 7900 11532 30693 45811 35616
2718 29383 28582 8287 30037 35215
2719 88150 67392 78413 70401 76594 76552 80097 60972 87492 84443 88992 82323 77878 45549 70994
2720 68422 28066 671 89 27683
2721 13059 10871 29413 1916 7239 35949 26759 10145 7230 24860 1409 11312 5489 23697 12026 32032 1010 33980 10872 1964 38288 7161 5475 570 7238 28537
2722 28591 696 10874 26826 34450 6549
2723 48108 45845 66598 76880 83412 44895 76086 73611 69214 86627 5736 29522 28273 8420
2724 32617 4712 4439 526 52752 64621 20989 29496 41255 42546 13040 54865 29946 33709 17387
2725 973 7478 24960 29975 3 5466
2726 32892 40720 8471 3990 372 10165 664 26485 8835 5277 28688 8846 4704 23016 36076 21474 380 379 2053 7786 1135 10052 82158 32476 33179 38571 55789 23080
2727 5392 6911 11665 23269 42460 21863 24011 186 641 11200 8755 5405 6556
2728 24994 71924 60758 29702 64072 75274 54425 52255
2729 30934 25374 7087 52463 37510 36448 186 172
2730 673 1539 4807 27317 5727 6334 24361 5111 6533 6523 11747 6595 27211 36990 26800 21471 22983 22988 5961 40293
2731 1338 56837 36082 66684 45799 44361 34610 10401 55044 43763 39542
2732 39311 44973 37354 42606 73037 44430 23662 35382 11182 46827 26874 15702 54243 47492 7903 40419 27072 11191 66717 63335
2733 10951 38 25604 427
2734 1644 35919 16957 32025 24032
2735 23710 24856 9151 239 5401 23748 278 34250 10938
2736 18150 21603 67079 6249 24665 40826 38482 45829 10657 11823 50327 33437 39525 31709 37085 39598 43399 38830 10401 41630 11837 959 45804 70316 36810 38780 22457 26472 30559 34613 34216 42714 33463 35565 40305 46774 40278 33260 40201 22872 62214 10394 11868 42490 43465 44104 68697 51678 7968 2627 81931
2737 9029 14055 14616 17087 8140 9843 5629
2738 8097 7822 7828 10978 29266 11222 8095 10982 7801 8099 6442 11214 7825 10796 23828 149
2739 2930 24682 9787 34082 24280 24288 29790 980 693 6808
2740 37697 7503 46614 8732 29846 37545 9359 29857 31973 27286 38302 6906
2741 18596 48299 50328 35541 44955 20706 20675 38556 68268 20735 20693 39020 20689 64389 55058 19730 20804 21042 57581 53731 35067 28215
2742 6580 9071 4956 23909 23672 527 39254 24909 6590 23674
2743 37064 7118 74384 86716 52633 40334 26354
2744 28244 60329 67780 16772 71741
2745 12371 8221 12944 42412 21069 71813
2746 957 28225 1592 26769 1603 28960 5649
2747 52556 17660 64800 34701 39660 60712 41824
2748 10390 21595 11835 43399 38416 7916 35793 40417 39627 39786 32058 38449 21601 32012 39892 38201 40045 31714 40098 39984 61180 40241 73786 38979 57977 57975 49163 70540 33498 34142 36815
2749 71300 62577 41961 28240 60332 62580 64322 44817 58142 62607 35308 10003 72520 52755
2750 8018 13606 9615 432 3067 7996 5547 9625 4958 42810 740 36796 13760 23895 163 8790 29034 12447 39268 54374 6687 8766 14018 335 24283 21850 34028
2751 44196 70104 79526 75263 6949
2752 42826 33715 42252 35562 29959 32565
2753 22081 36380 23373 31384 2743 11675
2754 44438 54285 33075 40303 75970 6807
2755 28570 28464 10701 69695 73001 59528 77156 1496 64613 24643 78796 24328 29216 44935 34401
2756 17974 30630 23596 18925 42703 23599 29087
2757 23712 9350 22993 6333 21502 7776 27802 24435 1087 45098 7243 29386 30317 6545
2758 45800 31712 907 44170 46470 76846 59809 47758 8261 36510 8318 37634
2759 25268 28658 5615 29750 1379 5182 5599
2760 33480 34611 78531 46770 42481 59828 48447 71258 29212 33509 7507 29689 7042
2761 59660 43804 37369 80603 33508
2762 29960 5682 44367 6871 6649
2763 37777 4207 37559 45810 44047 64199 41017 46825 9292 40681 53182 55485 9299 71588 7384 41901 60371 42641 40712 36834 36214 59234 7311 43076 62201 28426 80402 34683 25380 21594 26458 46612 38143 36066 4269 46774 40727 41500 28335 28664 35946 11950
2764 53757 45434 41129 8984 15384 15824 5168 16090 12929 21069 51983 5187 52009 30031 7381 12350 50761 16035 12256 18534 7167 7879 19862 8107 34762 6249 12361 23619 21320 40415 65464 8176 5155 12988 21511 30890 23579 10365 16383 62313 1129 8582 19328 25168 28880 71287 3300 12606 14772 21890 12372 30652 82 3759 35064 13047 21893 55726 14770 20530 8256 32592 24770
2765 8012 24721 10926 8550 6528 7228 5966 1469 1653 1352 1123 8827 28274 26755
2766 7964 57291 59876 26457 55004 10127 22903 59877 59363 57158 51829 51830 80613 22659 22708 22617 22814 57294 22618 74679 89815 59880 7963 63963 82155 57295 85050 69491 33485 63964 75659 31713 89423 65540 81153 29212 87642 90225 76634 81865 91223 90392 38812 73579 23428 22867 79235 43465 87177 73512 22719 76308 69490 33403 3713 90226 33794 76389 70373 7974 34140 22900 36049 84002 91384 91203 35577 61727 85505 22660 65052 22846
2767 11441 10449 18424 17773 46544
2768 25040 5111 24702 27164
2769 7514 13225 30569 29656
2770 136 8495 23987 1031 32230 12381 23988 52 9534 428 696 28113 22
2771 52791 25235 27949 7528 25254 33 9049 27800 9058 35934 27933 181 9162 29673
2772 31084 39082 5703 7548 8112 9054
2773 34979 12224 45476 10861 24159
2774 6665 12429 5615 11279 566 5440
2775 29548 6315 81 6830
2776 13062 32591 32586 6809 7185 8608 1986 6042
2777 42112 19231 7950 40121 29967
2778 21977 36272 28559 51863 1083 1367
2779 24815 26062 28255 29241 23995
2780 8421 31741 37554 6686 7471 38849
2781 33304 43287 35678 3513 4055 33556 9471 2057 9003 11532 28625 39815 35059 12022 5475
2782 1026 1704 1731 640 29127 26639 1641
2783 23489 14712 13004 570 42021 28561 12840 42983 12606
2784 28304 597 429 1381 56 23001 41659 8512 23909
2785 5682 13735 75631 29000 1868
2786 24853 22188 3518 5138 3740 12794 23077 18168 18403 29501 7786 16793 24547 12989 12808 35751 22250 22171 4746 26343 1079 5531 9473 3513 28625 11532 10637 31165
2787 48955 23330 35999 8563 15155 30501 3132 21836 3391 26778 11631 1835
2788 43762 48421 48154 30203 30202 57093 82212 43761 6855 51659 86649 53506 49162 44077 32084 85080 85208 10865
2789 13052 7716 29946 85501 33505 35066 7974
2790 7848 46381 26957 32339 30033 4364 38990 2834 8966 26746 28905 53634 29035 31050 35682 43025 30736 23836 7518 7384 53183 44589 42640 36867 26956 22258 36131 57393 4486 46518 35128 8855 9319 23844 12218 27858 41541 26787 29431 22983
2791 5648 2362 22333 1119 32861
2792 11312 1364 25193 12320 12465 1042
2793 6451 1638 1063 90 6076 12808 1005 5987 1748 967 61 8886 8519 2562 18901 1008 1665 19323 29306 1447 13075 1727 8472 5653 20987 23298 12336 23299 23300 23575 12840 5102 1331 8961 49104 1241 14211 15823 622 13056 12266 1463 1250 6767 13046 670 37486 30801 9012 7478 25183 1372 11848 608 29182 30791 81729 29183 390 33947 5932 8896 6517 8270 41865
2794 50779 17261 8480 41079
2795 28290 1550 28575 29013 23994 7991 24022 24721 1435 11655 6657 4936 7477 12028
2796 23055 11661 23307 10060 5479 27254
2797 32907 10180 35948 25167 43783
2798 8163 22350 2838 379 12371 26952
2799 27117 890 50342 58596 30823 16647 82361
2800 12799 43066 27540 37993 24679 41479 6852 6379 47526 48402 26210 21649
2801 7505 8027 6576 7042 6864 1707 8838 5445
2802 44321 22022 22567 39174 29149 7470 10677 70071 13007 8272 1868
2803 8118 49105 21405 77607 39335 4529
2804 6017 379 5655 12501 24678
2805 35587 1843 9927 8267 53602
2806 447 91 10861 27782 8766 24290 6509 10411 24186 25042 25361 709 29000 12852
2807 10883 32451 28498 27970
2808 23956 44398 34349 29462 32204 39712
2809 6842 60724 64066 62409 80141 72385 6929
2810 79780 33488 43043 24800 12405 12396 27027
2811 25370 551 17880 12975 12805 26606 4393 25041 11073 32332 5233 40487 36964 29502 10328 42083 32661 57668 38296 55984 12115 54731 1517 2480 28201 7507
2812 12772 36616 8263 7216 8930 1786
2813 14738 16922 16852 16667 17274 28702 17180 3203 51387 3536 10545 759 36386 31808 3736 2245 32201 28347 18275 2946 10539 18534 43166 7680 19034 36015 4434 41180 3316 41214 20435 41215 41221 62786 46092 7021 23333 5384 5450 12424
2814 12256 33535 28628 7891 49735 42427 35869 33702 12980 13047 53723 36237 35336 33699 39588 43522 32699 33714 7206 31 7478 31320
2815 9235 33047 35796 42016 41988
2816 38206 40727 29171 29166 87339
2817 30742 42989 3863 21060 3481 37345
2818 28232 6332 6796 23770 6594 21959 16 30831 6617 8131 395 6793 6927 954 6338 6299 6906 48812 5608 5609 5612 35580 10143 26241 12167 21604 6593 42263
2819 9372 16214 28514 7041 35531 8265
2820 22658 22677 22659 39876 51503 68776 22688 22719 22720 22708 33459 22751 33025 69193 22831 22814 22864 22771 22862 81097 70264 87177 59879 86828 75708 69197 59880 80599 74679 22849 63964 89423 73965 86264 57159 51829 51830 86825 86827 73574 90508
2821 8395 11941 2379 28831 8732
2822 1550 40790 24758 7738 12026 25052 7739
2823 65380 42727 42732 74122 77813 65532 63224 9060 32132
2824 10188 31346 5987 36368 42763 23374 38827
2825 5682 31494 29918 12364 11570 38412 10637 50084 7891 45652 22308 6911 33220 136 23611 39476 23928 12841 22250 12819 12367 9490 38416 43069 36278 10639 27423 39761 24905 6827 56322 39767 28343 7971 83672 40871 10388 30218 42321 12202 1592 24873 35927 12369 33793 10592 37510 10673 80107 48425 7423 42914 6623 88536 76767 5964 24946 35115 5453
2826 36103 32156 8322 4797 10 33916
2827 4786 6987 24384 13060
2828 37786 20448 5599 32864 409
2829 17692 10290 10637 23618 45367 39316 12840 24953 12729 36278 33495 36267 22306 39992 32837 6246 13025 33714 12373 54027 46759 29694
2830 34683 32090 38449 39682 45802 38454 39852 40993 22778 40124 55796 27074 45583 42529
2831 33530 32556 38188 39401 7132 41201 42520 52330 52361 39568 39490 39639 46185 39702 51259 26923
2832 15387 13893 15395 9859 13 535 541 16122 3104 17264 482 11045 16740 16895 17265 17087 17246 16392 48560 18094 18119 18686 35085 69372 19196
2833 47562 10083 13788 12839 20109 32879 34546 4243 30933 10375 60297 24659 26975 1049 26436 64621 11813 59644 35869 43154 37403 30808 1550 38191 45809 68813 30800 37496 46308 33449 72975 39600 7904 9014 42166 39626 39685 7896 31156 42820 55044 33250 27073 23457 10699 1595 13025 11540 11610 26505 4074 38448 4201 32870
2834 2673 5937 33572 19354 36000 2965 2320 8714 17372 57904 4875 2546 34062
2835 77573 39113 10404 10132 33636 11833 22657 74699 55461 35372 7917 39940 68725 40682 40993 7940 39944 34777 40010 40013 39825 39987 39999 40058 22748 39994 39995 39992 67915 23941 52510 57807 33461 40071 40068 60521 3640 80054 34396 48909 52639 40152 40074 64658 35927 41786 82178 38454 11192 51660 46565 47858 43424 26213 57984 40240 29202 35497 43054 46888 29184 62216 59384 45912 56895 40199 71274 89078 22950 57160 45581 86880 54462 44471 43964 50651 50539 90668 90635 35498 29627 40230 49162 34145
2836 22198 6490 22929 28859 23427
2837 31289 26821 26316 38501 38764
2838 47627 41887 70492 72405 39761 68630 35574 40241
2839 6638 14482 2331 6085 12901 12592 8012 1004 8925 2679 22342 15531 8543 1257 31877 29598 21524 8391
2840 31698 34135 33466 30707 49105 36237 9023 42321 12840 73514
2841 55790 43042 33560 24206 24384
2842 53724 6669 21503 27789 41494 10829 37096
2843 42015 59373 45263 45581 45583 42260 8428 1698 12758 11642 620 30659 5643 29775 7498 24928 12767
2844 35940 9365 6530 6405 16 31183 21605
2845 6582 5579 6899 21919 4918 17708 52366
2846 6827 7212 1428 25345
2847 1078 38072 10866 41472 35666 32237
2848 22719 22659 22708 70264 87177 27553
2849 22401 46680 31593 17799
2850 519 14705 576 1138 5648 12351 29308 104 7991 5546 7770 319 10162 15757
2851 6911 27915 5599 27477 389 6921 12206 24889 10826 34961 29373 1555 1542 31409 34070 23703 12334 5378 5415 16317 5821 4981 38296 5396 31323
2852 10713 8947 10829 23420 47389
2853 11884 6381 9645 27799 6337 41066 32265
2854 33488 71839 82045 26751 394 3386 28971 33513 5577
2855 13145 58395 10401 9248 4719 4087 3959 71050 38100
2856 24996 746 35582 12235 32570
2857 6961 6963 40952 7006 7437 28290 33605 37747 8322 3566 31964
2858 29159 38250 29192 30905 5117 39941 59367 40199 38330 59374 67695 79361 81153 76385 3266
2859 21610 27445 5725 417 25128 4811 29370
2860 21295 52386 40680 37742 40679 37735 6988 6946 10436
2861 32060 42213 22721 26227 52668 23643 55288 40677 45579 45375 57326 40297 48605 37420 43773 55401 29167 38914 34138 42796 61181 55911 11868 47881 75659 37528 90942 49161 36584 32399 46716 38294 26694 10919 85505 50652 88547 40986 4820 6523 34154 1433 28910 36338 43776 8755 5960 395 23305 12036 23775 12479 3045 12221 36494 7791
2862 40725 28638 42519 33542 21596 21598 12260 21538 6262 48863 39611 32692 62496 5921 33251 45282 11145 23939 37356 32381 39591 39764 39782 50197 34781 52585 40242 44943 64758 38327 50474 36896 81598 55797 77233 32622 50652 52091 33735 32408 29876
2863 30089 954 987 7410
2864 12692 18731 18329 9970 4288 39530 39883 37367
2865 33586 40706 10212 4857 44673 3474 26505 51631 42207
2866 13004 28098 1879 8842 5264
2867 44725 4776 82022 91343 5736 5945
2868 29946 417 42780 61556 4831 8368
2869 29115 8065 37 33319
2870 41012 26756 388 6554 1103 33992
2871 80040 28944 47215 87473 90994 35465 87576 30248 91149 41507
2872 36272 59828 39112 22726 36283 34773 32387 40044 11151 39993 40021 40028 51288 50472 50294 39989 35058 34137 37364 24800 40250 62409 40256 39986 42222 59351 53506 57983 47250 29202 65540 40030 85505 91123 33508 89815 33509
2873 20755 35970 54858 7891 12373 26518 68274
2874 37079 11096 45430 45807 46748 44592 49623 45325 1501 684 25410 6528
2875 24347 29614 31632 25369 29428
2876 34214 44997 40710 1585
2877 88088 85127 89623 38759 25271
2878 33995 16270 9868 15775 6785 15393
2879 41687 40460 39394 35868 1024
2880 34815 12026 890 12489 27020 13042 12364 31703 35800 10388 22497 12837 12361 17056 40871 45963 33591 33141 33826 30206 9487 23631 7950 12372 171 30975 6736 35927 28593 87875 24647 40101
2881 11270 37094 33783 157 7815 270 12488 2476 10946 28411 31238
2882 38255 67788 51770 40272 33479 42118 89815 61599 82876 33485 7974 35574 6858 35577
2883 28476 5249 9283 36385 23140
2884 11186 33483 39979 53978 41234 47637 37248 62217 29969 35194 57156 53625 11192 39801 90220 10174 11862 59387 34986 46716 61476 34613 83957 30172 30962 32408 74686 82126
2885 63087 86379 72134 74842 51846 82019
2886 30818 27036 10687 220 34679 43379 890 44091 47523 10735 26485 1112 32964 23993
2887 6097 82360 65599 46191 55542 6267 150 33111 23137
2888 684 12274 7500 24827 29 76
2889 15235 27927 20141 30684 27148 34304 27992 7532
2890 24995 41600 427 28928
2891 1889 108 1164 8008 32730
2892 40406 39376 48353 33257 29148 39694 40786 39576 49608 42365
2893 48749 38987 38192 40778 10669 545 11147 45295 35058 39952 35090 29965
2894 52207 33130 118 10170
2895 15072 43143 15008 31135 20466 35423
2896 33418 30200 91285 12418 2855 24803
2897 22085 646 27747 1182 29896 9418 2700 4815 29838
2898 5117 32733 12790 11796 4854 17441 19262 20457 28630 15056 33900 33901 398 50875 77786 33055 33056
2899 77734 2853 23618 14538 83114 40321 90849 32473 85884
2900 21170 4839 65255 52424 37861
2901 22175 4209 12694 23564 7716
2902 4002 1245 30105 46110 11443 11483 3881 34704 45608 5545 52381 11501 31193 45439 36018 27436 24534 21325
2903 14962 3695 33452 7933 35774 11558 40966
2904 26960 48896 32180 8565 8579 4534 50059 12029
2905 52145 321 11837 26239 64908
2906 8349 27917 8526 658 5336
2907 854 519 59008 374
2908 3468 4135 8214 4292 18927 12709 43744 55971 8208 11861 7437
2909 5390 28159 32214 28274 23696 38417
2910 29735 6536 22998 377 5432 23049 673 6521 6522
2911 23381 7344 1128 4795 2733 9174 789 5743 32970 51760 27225 10261 28917 33374 11790
2912 43256 42426 32200 28347 36802 12680 12634 1842 17261 24544 36490 7972 56899 3960 27416 73850 50469 55447 33075 80625 50779 81196 40297 40222 40178 40227 77233 8258
2913 83672 33597 34552 37537 42367 35556 9769 30665 32607 7288 23017 30837 684 2227 2077
2914 1916 4832 40365 8825 2746 2943 48697 43345 31790 24235 47793 28669 24923 42125 1814 10247 3014 1815 10847 34172 3827 3313 13110 8085 3756 8826
2915 13667 15170 16423 35040 42382 10791 19791
2916 9827 541 15229 17014 44290
2917 42366 7919 11952 22074
2918 7633 39169 74517 54898 32728 10723 52681 11861 59357 42525 42530
2919 26859 11576 55790 37730 26753 33457 71841 27768
2920 60294 62765 27592 51816 86732
2921 483 8486 8601 8674 8265 9751 9806 10611 9903 5171 12329 29514 6888 28219 34833 27586 22223 23384 22226 9943 10613 8585 4260 5233 5784 5648 27562 6889 8231
2922 80623 73047 20735 12307 12303 48411 7529
2923 28673 31504 2287 11717 34374 1504
2924 8848 10875 28050 10824 983 7748
2925 46776 5268 32823 11298 43869 28492
2926 27612 39158 42298 34514 41417 39823 68944 52408 64680 7719 51283 2654 40243 39712 21068 16179 57671 75057 62218 8819 8795 12977 13030 28330 50651
2927 1652 24444 30051 1772 3284 38054 30105 23420 8825 29076 1024 2613 35024 2800 8253 1480 1771 11208
2928 48203 46555 80621 42527 22996 58382 55392 1721
2929 4658 47254 62887 34850 45647 79074 91122
2930 10697 17483 4255 11999 4551
2931 11047 18195 3970 18213 17151 18189 18773 4125 18620 41327 61430
2932 21012 30947 61197 53971 47419 38 228
2933 40380 1245 84459 23006 8848
2934 40234 11167 39173 37416 40243 11196 11175 40221 40106 43803 59386 40206 34986 37228 91574 88281 40281 39739 3266 91390 43465 39873 74916 43459 88581 43700
2935 28819 52463 417 60726 43582 51769 83531 966 41624 43254 40128 42728 57876 40053 43698 89262 38573
2936 3585 24106 3875 73487 62443
2937 24650 67604 82494 12502 33163
2938 6533 395 1714 5977 25321
2939 23420 23366 41416 15531 6492 45943 74606
2940 10892 28164 31522 15748 15767 16624 23405 10688
2941 7813 5401 11289 7809 671 7825 46 9057 88 26016 8104 149 8074 23212
2942 4632 6984 29896 23690 29217 24023 10850 23697 2842 29371 28847 25455 28291 10142 8384
2943 28106 5964 1601 12865 8082 36162 4996 8694 7844 6779 30818 23689 16829 7504 6824 44619 35797
2944 38839 16976 51362 56219 45876 54122
2945 47257 41650 42521 39847 25518 66716 38979 42259 65540 40199 34142
2946 280 10214 5252 8157 33971 27493 326 46160 28458 203 117 5087 474
2947 13874 7550 23898 38165 21850
2948 24151 7414 10188 8863 2763 136
2949 31324 30480 10 427 12871 6927 11906
2950 31989 48236 41660 57909 21594 45803 22777 48038 39948 53017 32049 54305 12546 55916
2951 22361 21989 5208 1252 46756 27049 12369 34131 5123
2952 5394 8736 12450 1841 753 51762
2953 21183 26048 60358 59489 62433 37300 37172 28770 28810 41823
2954 33775 32393 36771 42914 91263 23214
2955 11456 30130 8873 11428 4012 27042 4746 27058 11532 22265 27013 4764 8490 7167 27063 27023 26789 84743 33448
2956 6618 30140 704 11342 10976 1603 5392 24815 8109 24770 4938 114
2957 6315 36999 6867 30140 37754 675 380 25135 286
2958 17372 8403 8325 23195 25425 9645 1586 11878 23191 23185
2959 9204 6604 6785 36575 14458 9485 32689 83532 50536
2960 37395 44113 39396 32518 39369 6232 11812 11813 39392 39409 39390 34600 39393 33435 39453 32550 3601 7716 27423 34955 39561 10394 39450 37407 2970 48743 39815 39556 25385 40223 40069 29195 39824 37419 35492 40019 29963 40233 75066 43266 50476 59658 10914 26691 40251 40225 32399 90301 81493 84555 86138 29959
2961 7822 7409 10982 7814 8097 11295
2962 38484 73671 64818 38887 393 26816 24010
2963 7984 12418 23707 11279 34787 7803 10 25219 5614 987 28929
2964 136 13576 10806 8118 1382 77 25144 43 120
2965 28612 5830 8526 46251 7240
2966 933 17049 5172 59586 66760 943 33449 39172 35555 33454 55763 69704 47269 64601 62545 73495 68982 72750 33494 20116 435
2967 176 56566 7002 49663 46467 44891 28760 15600 38897 59840 34135 34158
2968 2271 5052 7345 11496 5977 29973
2969 2388 294 21924 8917
2970 16786 2867 23417 7857 13110 2047 7746 32196 33131 33151 43164 32197
2971 1793 56895 26770 38852 36855 10504 34069 1727 1007 33976 32423
2972 49112 899 33413 43358 25502 24137
2973 18432 7566 7573 17571 33344 52217 45241 31844 44409 20368 59715 28741
2974 62276 12935 1 30732 70698 5420 28226
2975 44589 8413 37006 27064 42408 28905 26771
2976 47772 26205 50188 43573 51161 43369 42003 21146 41273 34607 5913 44120 43371 33448 29148 80579 45759 34955 32053 26877 47422 39538 51273 40420 34773 51274 21602 39861 9017 3724 43009 65295 81358 40149 47838 40203 40189 37428 86164 39232 62219 42217 40018 11862
2977 20556 60181 11086 39387 45960 32086 26364 30646 30997 10684 39440 21597 80684 40198 46563 57288 91061 39980
2978 10583 7337 31211 17583 40310 38978 6533 46253 3718 34599 24664 47083 36827 43779 50766 43346 31785 23853 29290 26618 35391 28125 29974
2979 22556 43902 58399 61525 59926 12369 16965 10703 6794 57675 1554 27699 6906 4936
2980 56305 40297 39751 37361 36737 36736 31761 50119 11186 11862 50474 49608 34521 43265 37432 39234 81494 32567
2981 10702 30109 29342 57970 25298
2982 46586 23601 10397 42557 38916 32384 29955 63230 7948 60521 57291 80613 29421 38359 8701 8599 5414 24871
2983 143 1637 8465 26923 27101 28176 1764 22975 11629 55045 6344 5470
2984 8762 13447 8109 21984 13434 8114 38398 576 24881 6620 12019 6656 5820 4937
2985 35661 10052 4637 43026 38887 28122 10139
2986 15729 11044 15581 28024 51409 15843 15815 15806 15814 9538 15796 56406 15788 15879 15883 15875 15874 15913 15938 15969 15952 16055 16112 16124 49256 16331 42847 8957 43919 42175 826 17561 18329 18645 11081 18887 42295 36014 19461 21187 34724 47101 41221 31473 38968 28802
2987 40108 39787 33718 36277 39909 22749 71804 22950 90196 59379 91380 78151 33491 1732 18 33558 31649 27801
2988 27550 33910 24809 24148 10826 27745
2989 9112 9131 7431 6293 5500 13629 6669 24916 13745 10818 8613 13704 15842 22246
2990 45315 26581 5629 6321 41991 9557
2991 34214 60375 29152 30752 9981 43962 70540 8310 38605
2992 23552 55354 53261 10124 30128 71325
2993 27644 6857 30530 7803 71107
2994 2904 4734 19267 38804 47113 35661
2995 91285 16894 946 5357
2996 25675 34494 5784 25833 203 18956 7510
2997 43110 29392 29775 38605 5286 6137 5839 2532 10660 65457 2653 43446 29295 1352 662
2998 6292 10540 5146 6623 66450 6637
2999 1048 43089 27335 7972 40527 366 10409
3000 5698 12854 6340 31575 6823 1371 24260 32207
3001 7212 26644 136 170 171 5101 13701
3002 33786 1367 7257 396 23080 30140 395
3003 457 37713 11387 10090 11553 22118
3004 18096 19219 37460 17979 4019 26851 50710 23907 4439 2644 1431 27578 12365 12824 13015 2985 8268 38284 23550 46423 19760 2950 21150 10383 10172 12512 33702 6397 32388 6851 53721
3005 26486 5036 47107 40317
3006 46471 34672 39505 10701 39449 44594 38449 40135 47630 39233 38433 32345
3007 17509 8236 28820 41325 31777
3008 7149 7170 7172 32265 7333
3009 40304 41299 52022 12992 39716 33709 34134 14815 32740 80893 13029 22646 37563 76 7192 30440 44 195
3010 30376 24606 34517 30922 10739 11465 22274 4770 24063 32879 1307 24647 10100 11808 3158 1310 28200 32836 43327 12648 32427 85298
3011 10992 30401 34275 11030 14667 14800 35174
3012 45122 11208 46564 39876 29968 10622 18589 58703 55654 22056 82045 72639 7950
3013 45437 49831 28823 35686 35071
3014 12026 27211 23149 7437 25052 24772 5471 12206 11933 631
3015 29183 39910 40048 40214 61264 33479 79950 56661 8457
3016 42781 42232 23640 50848
3017 37567 7808 428 25067 21866 222 62073
3018 41477 37751 31320 7202 29095 32175 10851 537
3019 10958 9964 14053 2307 9823 9859 9898 54893 114 373 374 387 2374 13 34374 7331 2749 23818
3020 3437 19706 14506 35253 10294
3021 10947 8619 669 3075 10937 66 721 7200 57 6506 215 22026 43798
3022 11802 10375 27355 12843 35853 34955 38198 39808 23637 61175 39921 40152 10914 73190 35570
3023 50818 37407 10409 42826 43524 38773 32062 48216 3494 42517 51307 3262 22886 37427 57294 57977 53625 46831 42490 12373 33795 42418 35888 56285 28644 50840 37528 34135 37410 30256 91121 26695 91539
3024 26070 24407 605 29862 8737 616 8727 8770 8733 12421 8731 24417
3025 5056 2648 36400 2757 36949 15452 2485 5022 6790 15483 2853 15525 2845 15634 5077 23329 36349 10004 28958 10473 749 9448 11749 37141 5088 15277 25084 29055 3076 28119
3026 21760 7800 7809 149 11286 12119
3027 66641 8169 6790 61477 65621 35841 69828 68624 23618 27886
3028 4682 6126 26916 3357 51663 49096 40796 43715 1840 2490 7896 12298
3029 25275 5407 29676 5440 28220
3030 12167 5110 30823 27322 57649 29807 42777
3031 83889 12490 8772 24990
3032 62 683 700 11942 11943 13 374 7033 29000 25202 35504 11718 23787 7471 24928 23307 1368 1373 960 23877 11208 114 11782 76 38 5439 5964 46017 12003 41235 22025
3033 41707 29913 41710 6835 29210 43727 51195 50781 39274 27631 58199 10609 20710 5915 46249 516 29821 7551 6949 5434 6947
3034 50055 13024 55819 51401 53299 7425 5985 9559
3035 6544 26640 16377 16793 1006 1140 32925 21677 23443 27248 4938
3036 38189 47534 18825 6169 12735 1595 24721 66102 23010 8318 28223 4782
3037 47859 44583 45110 23593 52018 45121 82128 57334 31133 30248 82130 91149 48574 40462 42695 67969 17546 18603 59645 47490 87576 29984
3038 32997 10949 9404 25030 8 75
3039 23430 6524 26576 27445 23448 27695 8060 44040 8322
3040 8088 19544 14314 4884 9473 19551 5232 39261 31269 10577 42280 19815 10576 17640 19449 12803 18352 25117 5858 10598 20299 35836 9478 30913 6198 10594 30301 43746 29487 35843 32889 22284 3592 23638 60843 21535 22468 6182 12735 9481 32105 20920 20746 20516 30934 20822 22249 21149 2560 26685 35437 10605 21164 32878 56998 12813 12360 26604 13004 35874 10592 51978 25356 37470 12256 19718 35872 32957 35863 35876 24837 46445 24194 17499 44944 30970 23597 2040 13046 20607 12258 43566 29870 35698 46545 30962 46546 11814 19304 10678 26505 23590 28646 23618 6871 1724 6907
3041 10130 11846 54028 27074 42366 26532
3042 49879 21578 19108 40469 35378 40613 48472 8428 72609 5258 12988 50068 68724 47161 1875
3043 3346 6883 33226 6878 312 1840 18313 18823 10301 10245 45470
3044 28085 17306 3733 9927 24681 33938
3045 35446 10686 21592 29951 39880 43052 44932 39963 38914 47099 57700 40208 29965 83352 29966 68723 80268 53517
3046 4852 15908 19964 8267 1653 8380 4797 26713 21471 6273 6275
3047 6007 43269 11666 12235 26565 9170 7273 33183
3048 18483 17991 48381 18584 36916 18447 531 18581 18238 18367 18585 17866 18196 18989 18563 16810 18598 18759 18772 18506 18862 41989 27266 18461 10613 18537 18206 18755 18859 18670 18812 17869 36665 27268 12976 18872 18555 19027 17657 21228 19092 19150 18132 4296 19112 19277 48384 19121 42928 18976 533 19349 18512 40515 19014 894 19163 36923 19506 19406 19695 19768 5875 57205 7085 19730 19744 19898 19845 19658 19896 20176 19483 19706 20012 19929 19848 19999 8232 19873 19975 10618 19223 8992 19640 20260 20165 20184 19649 17491 20120 20283 20685 20692 21061 11115 21358 21365 21157 46199 8243 41624 7633 28750 38413 11125 65517 20592 26038 48707 70320 55579 29936 39606 62933 40693 41391 32109 64164 37915 28780 28045 39773 31862 17914 18009 59647 36701 27354 37173 28810 28820 68059 41406 53841 10906 37420 28845 53549 47683 42491 47383 43460 52424 81598 41631 53355 52427 52091 41823 66755 70580 36938
3049 2910 6448 5134 33405 12580 31667 10555 1823 1063 24345
3050 1866 15445 19474 35848 8221 80688 24681 64864 65846 22794 32356
3051 45570 31919 30208 23611 5604 26132
3052 31031 3283 3992 17483 4874
3053 25152 8084 10487 6154 12953 12929 27233 22183 12668 8181 9951 17299 12670 31746 8967 17277 36913 6196 17493 30155 12986 18059 5801 3056 20356
3054 8191 23579 22295 661 684 50171 31792 11132 23590 40855 24348 33111 23593 32736 44623 32517 1069 13046 35724 41444 27543 30351 10387 5519 40412 3911 1857 1343 18840 42691 23613 28645 23611 9481 12355 14545 35555 32384 27073 677 6918 29716 29946 34683 23637 33838 12454 32118 32383 51497 22250 1 23628 10388 23631 23609 23641 27068 40993 37563 23596 20888 56813 35661 23597 23640 16546 14627 6602 10365 44621 971 49105 45314 10812 9696 35402 35059 60521 35564 37005 23643 29184 13048 35090 33212 44924 42717 31276 77685 43424 30218 28630 18218 35497 50537 32398 42705 24764 1871 12358 6514 7950 7963 65141 35498 35065 10909 33115 19430 22247 55392 30219 659 16469 30239 46565 9018 14004
3055 22020 36283 12206 409
3056 91263 65369 1814 4408 57977 90717 10791
3057 1137 1217 11628 9403
3058 53818 38867 1508 23881 23805
3059 36132 33771 81348 28638 42108 34683 26982 38482 27056 30799 40682
3060 50703 62544 3659
3061 23455 51977 8191 19050 61330 56984 5278 1005 5334
3062 86494 85308 54589 87212 67127 53540 76048 89511 86068 86939 71931 85859 83888 13681 54713 58909 64548 57286 84766 86201 74087 88998 64995 83381 91500 37289 89679 63462 85698 73446 38733 73289 88964 85984 47238 86781 70059
3063 26260 36985 39513 39633 3441 35796 46315 32388 46993 46563 40598 52681 59374 51296 50538 81154 62298 42531 696 29386 2177
3064 25444 25450 25451 6741 55413 6767 48222 5036 4968 2726 1024 12011 12371 17293
3065 62152 40891 40314 26518 26519 26520
3066 8213 30056 36577 30078 2003 37013 35730 1024 23451 25361
3067 16462 42994 8416 19964 8267
3068 10632 22297 29926 41185 23603 33442 38487 22309 6246 6254 29929 29932 38192 10679 2203 10639 32691 11164 10677 30997 10591 11837 35566 29965 42118 42323 35574 23978 22263 22312
3069 908 30348 46790 32689 44681 10294 27145
3070 70163 69284 56350 30975 71839
3071 28797 61250 61251 36582 72141 39730 13
3072 17065 1814 18332 36385 4396 17880 7078 26573 5879 40918 5737 890 37044 10893
3073 6569 29360 31330 24765 7637 28294 6776 23074 27791 11891 11657 28291 29901 5346 24366 5722 18255 6570 6678 28131 6586 5153
3074 42017 39993 29167 37420 35060 40202 40278 38980 11187 51766 40678 40256 37433 31842 11969 11194 40069 39837 39730 39941 11847 74678 81598 37 52684 40194 59355 36814 39866 43458 90791 57287 32566 59362 43770 57284 91415
3075 34832 5471 26717 10443 8331 1370
3076 20003 19979 50331 20556 7111 37048 30937 21336 35438 45635 21058 10356 766 32048 45345 21577 33697 39401 39389 39525 30995 39173 25510 33493 770 35550 39880 31715 40056 40193 42492 40208 40182 53517 82182
3077 2042 12177 118 24115 687 425 9196
3078 35169 11552 11128 11563 39338 4874 34615 10660 6262 21595 24194 53342 44708 44757 57979 61186 44837 4784 8377
3079 6702 1140 11199 14004 34920 253 23676 5063 288 44780 15684 10934 31571 203 8864 7879 24168 5043 12184 1364 23134 382 10218 6830 312 34988 2490 347 10228 2879 10214 16185 16586 21511 9741 21916 220 16073 29 42760 10797 6891 26062 16449 43038 6806 7008 7000 42128 2407 42400 12917 527 1916 40321 189 27643 5087 15866 975 8437 8140 47560 3285 16334 12313 978 325 1373 23082 473 474 8192 10197 5103 375 25308 3211 30415 23387 6890 6763 15081 14627 23559 38828
3080 42786 10585 42247 47144
3081 9174 41427 32827 42270 2740 12574 50353 40369 24051 5115 23353 9413 23420 7848 30117 57176 36129 33772
3082 43792 26203 39111 33539 38249 46185 58324
3083 36668 58240 49628 41710 49814
3084 717 25219 4948 6983 5467
3085 25773 25740 25793 10093 270 15984 25796 37792 25818 15507 25871 47711 4235 20314 56132
3086 21840 4945 4611 13760 623 28666 9658 5499 8502 13831 13692 13701 12050 13619 746 4976 987 10689 1427 4981
3087 51972 7883 15822 14000 49705 55314 10401 66910
3088 57215 1866 65974 58504 47550 67220 3955 35368 68239 25423
3089 87410 70337 13075 5111 2875
3090 8621 8633 8653 8667 27972
3091 17 669 6665 24206 7990
3092 22466 27068 40235 22938 8575
3093 36066 2490 83713 7925 19696 4067 50535 1474 26892 12750 68219 5195
3094 28846 23266 23270 34445 23264 2571 13365 6993
3095 42246 11124 33432 38200 58873 33483
3096 16748 16534 33093 20237 21133 36998
3097 59346 40347 23606 26227 30826 6871 6883 33702 55755 42231 5188 31745 7849 41018 60355 11842 29946 376 9023 31178 67694 28882 5225 4576 47880 91262 44153 28442 7410
3098 56748 60208 57569 46846 74617 55263 63223 88556
3099 53480 61568 9346 63459 41824 4793
3100 5326 6397 41688 10845 55485
3101 32603 31087 65716 39118 48273 61030
3102 28410 28409 25425 25424 25423
3103 17755 46785 49108 7002 9049 50051 5434
3104 22293 47822 4729 32393 2626 50550 8340 10971 647 9367 5383 23009
3105 38438 47581 11111 23919 6211 48288 26353 50029 51899 6842 22524 43392 45850 36849 10746 39417 11570 33430 43764 26504 46877 45454 22472 22569 7469 22606 35121 22636 42200 22698 45183 77620 22756 39937 39992 48848 6855 55167 26192 62215 86649 38294 71839
3106 12356 10584 4764 34888 12354 20072 23539 5149 22158 36864 24598 16304 28905 22248 18691 45497 20667 3009 40708 20137 24496 5047 16059 3233 42407 12708 9478 20920 28893 5146 22262 27011 1223 26941 18578 20435 20005 20577 22979 33220 30238 4415 6885 32077 12358 34560 22241 25097 4369 26905 28998 26653 13505 2290 37991 12361 8910 604 634 4264 9276 20480 4942 29924 43232 2486 11103 8819 4730 5477 2323 14796 25373 43134 39258 22293 1602 33792 26802 8792 10493 8969 38283 5811 23611 11594 33418 25378 18161 22123 21947 18159 5137 4437 9893 14211 22186 10654 78295 35341 36874 35185 40210 30208 35564 18403 32393 36888 72944 69379 6030 46235 9473 77270 31662 23619 10525 85361 52505 48420 23593 35927 32526 61451 5557 18740 10686 42721 8876 8388 38203
3107 54361 34757 32695 56914 81237 56251 4111 60018 14462 87311 86453
3108 25763 15128 25776 45030 25810 15577 11871 86873
3109 33966 2071 4997 1793 21984 438 9593 9620 11920 11921 9702 2725 9699 447 6398 5750 26558 28874 24316 2300 13094 444
3110 26213 27074 91378 45581 7970 42529 45583 39956 40029 42718 42323 6697 6698
3111 35643 4505 4582 38263 4730 23554 22285 53171 10110 1343 47836 60888 36082 89834
3112 38421 43276 22368 28930 26986
3113 7752 31893 67687 12360 26505 59911
3114 91 8735 5607 5405 5421
3115 39223 38501 26341 7364 29635 69477
3116 3009 16467 16377 3177 6785 890 25093 893 12808 19474
3117 27043 33465 36727 26763 30146 1147 27239 1663 22078 691
3118 9174 34006 1474 44694 7332 2996 25178 5782 2206 5147 38838 8437 585 11457 12151 6374 9234 27043 7321 40375
3119 36034 545 35880 20582 59150 36037 5911 21108 36630 59478 7114 6191 45363 44119 52351 6218 11177 40040 52374 57156 57288 52190 8368 28658 1807
3120 21294 16151 36698 66703 17092 10912
3121 4275 19354 19446 18317 18614 8407 8410 20509 24691 10054 546 3988 11138 46714 29715 63459 44170 30915 76846 21969
3122 54323 77482 74733 69198 90667
3123 673 2410 34260 13057 6692
3124 26160 132 24260 512 24163 446 176 500 30578 126 14352 14097 14051 14321 14178
3125 53892 51128 35363 66618 51592 85579 88280
3126 5559 4622 1457 36346 1261 2388 7170 1776 5800 5083 9174 1003 13266 30740 24917 30838 395
3127 11952 6506 13 49 8248
3128 12557 23320 16391 12930 3226 21537 23425
3129 24533 33083 39458 53115 51277 61535 54920 44711 39779 91503
3130 40265 39916 40109 40263 35257 31719 43457 29967 10909 40117 40110 37434 40213 35567 40274 73190 73185 57160 90791 53513 43465 59375 59355 51768 11867 82156 10916 39912 84932 82945 26690 55005 35575
3131 16757 23477 19204 19532 5258
3132 13157 43256 1793 8377 6544
3133 42790 767 38412 44669 35309 7128 59236 38028 39509 37360 56940 39480 39694 42253 39949 39851 51298 57875 80603
3134 42555 61483 57199 3948 1441 26518
3135 28012 9829 15530 2984 11042 16243 16254 9903 17317
3136 18536 72180 44393 90949 26563
3137 10811 11218 10980 12125 12129 7793
3138 10 24683 8936 23143 8302 2139 14746 6805 29061
3139 12356 30238 21095 20324 10318 22284 10362 6177 35437 47206 9481 21164 26144 6219 35861 551
3140 24194 58196 21569 41004 64986 64987 78112
3141 39712 39715 39683 22749 32530 39942 40990 29183 37563 11854 37434 11871 12805 91576
3142 22285 39164 12570 1787 33776 1294 10073 5277 26257 4746 41887 44087 44589 527 634 42408 1713 9285 6091 41351 33430 1410 37414 5225 27072 8528 28159 27054 42254 48425 42108
3143 8870 12871 6624 5725 723 394 427 5599 12877 2521 387
3144 279 10488 24117 2407 428 24076 22955 32853 34171 14422
3145 43578 29279 5525 32393 12857
3146 24954 24157 40901 13940 1666 51806 11113 41850 1793 24260 32178
3147 48157 70817 38720 38727 56751 82338 8641 47999
3148 41043 23466 29999 70151 39866
3149 26638 26888 25052 29294 32959 11769 23825
3150 22309 34672 35724 35317 29132 41903 22019 29928 34750 23603 11147 32086 26260 50406 41309 39455 32693 25508 34763 34555 35728 39832 39682 31276 12367 31178 33714 39985 31713 35560 40024 35373 23641 43964 37433 40212 35090 27071
3151 30478 46037 5895 3167 1252 38311 32170 10895 31599 1569 28270 19606 12794 8676 31598 8709 19199 8041 35999 21975 4014 20582 37946 8030 545 2525 7424 21830 8023 9638 26741 41724 4299 890 893 894 26974 39254 26793 27129 20812 13024 13055 28269 24685 24691 19322 1865 455 167 30974 24183 11941 40329 33721 19818 19233 3955 19173 820 35322 63460 2134 24230 1539 44378 7784 29558 80864 1667 6228 1538 16512
3152 28623 20462 36637 20787 11124 42247 35289 24634 10362 42165 6202 11562 34370 30715 50109 48478 6189 53638 45218 21182 6220 41645 38487 42605 30962 39390 4404 27069 39543 59357 42395
3153 22157 28490 27595 10543 43029 27058 913 3823 2057 74951 12841 38824 26697 33395 23972 602 5654 22312 5101 1806 663 23787 660 28537
3154 6519 26583 3085 10438 33270 12171 251 90 33924
3155 60014 673 62337 769 52463 48737 41551
3156 23838 12275 31773 1008 7230 1006
3157 11834 4292 70720 14653 35861 26210 6775 10508 69378 76415 45131 27781
3158 32910 38118 37521 15122 37581 6779 23873 6727 22957 2826 14410 6871 16150 8405 9714 7465 28697 6407 54183 70287 67021 631 6013 8708 4793 34827
3159 1717 28829 175 10452 7422 7234
3160 11858 32398 29964 47881 11167 35450 5650 50298 3199 40116 50538 1462 33118 79364 55005 40243 22622 36739 24322 43458 29542 79363 39939 28212 40018 40259 23357 38980 35492 59387 11847 90882 35572 42529 47250 43770 34142 32403 29890 5899 39761 43407 42205 70515 30906 33577 70385 81152 76385 1005 22268 40110 38915 88813 40261 91273 40276 33491 39234 28209 39955 57284 71276
3161 43608 35781 29700 49521 51539 29770 8749
3162 54710 57977 18775 66725 48396 65387 71834 64084 40040 80146 78190 79135 53356 37899 78184 43042 65951 51475 71563 83534 41223 47383 39884 40130 40053 11179 34986 11174 46716 39889 70554 43460 67840 16727 32567 83536 71556 84978 6094
3163 59920 35863 77766 6884 8373
3164 31001 995 30322 626 1663 635 6929 22338 588 11202 557 9767 2406 6061 12904 12887 1806 453 854 7058 2541 12523 6830 3229 7055 463 11764
3165 24932 30010 32811 36858 5669
3166 78225 29171 90515 239 18431 7206 45 43 188 6914
3167 40091 59348 57976 62215 40228 40983 61188 26691 28209 57875 62982 40073 80675 25159 80603 91556 63335 77419 90895 35065
3168 11941 40293 24204 26652 26751 12045
3169 29374 987 10867 6796 5248 11278 8632 23110 7637 6528 35210 24893 34155 41941 5374 6514 6690 8633 23707 29372 464 34787 28317 7432 8634 31605 6797 39002 28134 29523 32483 8982 5615 5629 29637 114 29363 7803 1539 21757
3170 5736 51784 34065 3887 28147 5726 9594
3171 25444 28073 24359 29313 8895 10061 12573 8936 37307 25450 25451 37310 37314 24593 12523 26698 1653
3172 28644 4779 621 26697 596
3173 898 33425 39330 21070 33248 50759 39425 21579 29148 39734 35556 39109 34612 39517 49015 32063 66481 84859 72265 306 29155 45294 59364 36895
3174 13670 6922 2842 44048 43871 5676 5758 10257 23148
3175 7815 1894 5934 11266 12157
3176 14747 11904 14410 890 49827
3177 26702 1241 21622 23887 23881 33561 23124 5808 31337 67611 35566 898 1622
3178 25747 9994 10020 67792 11008 50990 25880 1854 7815
3179 42200 32438 59855 81405 71181 58675 55786 50029 53317 74575 33871
3180 6654 7465 28406 8519 26757 1 1656 980
3181 37537 47161 24961 34140 33795 46569 29946 83587 45638 33794 6137 8012 33947 23961 7216 34154 7228 24815
3182 16486 16660 21047 21157 47157 69214 48177
3183 64632 28779 60597 84202 64908
3184 42750 36446 56291 39849 23769 72504
3185 22187 37443 35652 32499 27004 57990 38437 47912 25369 28823 35994 21955 32897 10826 7224 27450
3186 31814 856 24532 35262 33380 41639 8955 872 39411 10660 1493
3187 23279 6785 10233 4292 1374
3188 79228 45999 57199 28214 76801 28053
3189 17812 17561 17879 39219 26103 4216 18850 28034 4322 17428 20142 12703 32655 20566 11127 41195 41187 48341 33472 57877 40167 35451 19003 91321 90516
3190 60819 60294 35388 5495 51847 88596 73991
3191 31715 37426 52156 30214 28207 30241 22950 3126 26694 34142 56419 29507
3192 37783 46775 22006 1125 8084 26632 3454 36854 26647 41044 8256 8140 24783 12958 5684 2441 3530 15998 6397 5326 3127 4857 10246 42128 85 10543 22391 6889 5784 12987 1294 8104 890 6897 1866 77551 43884 30762
3193 12638 8301 10054 30071 31025 1618 6349 51832 50711 24090 1478 9395 23835 42201 693 30657 5679 12036 28498 28260 11298 1441 7929
3194 4757 12650 32377 33430 26858 46787 36810 32012 40418 52705
3195 5168 32441 18053 18295 5208 20109 20198 5370 4936
3196 7826 7522 7531 21789 34229 7524 34080
3197 25165 36156 5761 35579 44163 27139 40683 10826 23706 6530 9594 6346 23179 28295
3198 37579 8411 43282 70205 32765
3199 4872 24068 78942 12028 10843
3200 5777 3416 11799 68931 48855 4184 3510 62765 19218 19112 57998 36445 38773 40495 67994 58943 37610 10826 34220 12345 7227
3201 49629 42472 37389 34668 12728 36932 20515 10741 22487 27331 27346 49115 30618 43792 57878
3202 22054 10809 56 8472 62 10766 21847 15444 10806 15839 4969 446 27561
3203 21681 2055 30054 220
3204 24472 11966 24466 6024 6045 6071 6093 9872
3205 42682 20722 13047 29171 88250 53458 28926 69321 86262 34770
3206 186 52614 32457 6963 18432 29679 29244 25131 10874 29643 27927 211 5622 5629 6952 31312 28411 46778
3207 51483 10333 34343 13149 35981 932 34216 39894 54440 38330 62416 49161 10425
3208 14577 18827 35246 32806 6223 39833 12494 22999 22068 7720
3209 40137 42007 65466 51285 59723 11168 34391 7942 60186 60426 42523 7960 59369 81494 37431 44103 43266 40678 57980 57971 39986 29214 53507
3210 51411 47761 42217 966 32776 9291 23424 5327 27875
3211 44291 27056 56837 13048 44589 8424 46298 39779
3212 6774 6802 5615 6618 7410
3213 36690 11083 20404 36930 19375 10362 8013 10526 27012 10638 42180
3214 44882 80748 35764 29137 56082 26035 52018 64985 67333 71910 53277 48984 39924 20999 6292
3215 10384 41201 10399 39600 53345 33720 23915 66737 57293 33741 1713
3216 577 24947 24885 3927 42537
3217 85364 30992 6207 60964 29496 37488 30545 37493 5648 37490 39583 45080 525 11845 64165 11820 10322 39933 39920 65154 29537 41359 18981 62015 42983 59350 89899 56015 46606 6076
3218 44442 43742 50706 54269 26473 8323
3219 9113 9115 13569 2407 24992
3220 44131 33175 28567 40706 44636 38172 33368 11303 55068
3221 49 172 154 4936 5591 8612
3222 2940 26591 12523 23381 9396 34563 41684 32733 11055 23491 10056 32339 11487 11471 32316 25205 44989 26631 38198 27423 3547 2973 55464 11788 50779 40017 47695 79364 3199 72405 59661 43529 35572 77490 62982
3223 53438 42564 29210 8221 52475 40335 37510
3224 89501 26213 62214 54028 33260 40228 52638 42367 45263 90579 42719 90152 80542 34142 10826 40 26365 8051 26801 22983 12329 6927 10971 33921
3225 33628 30780 35869 28638 26276 5225 54903 28880 33793 35090 40980 4560 12840
3226 8140 38502 854 33239 58243 45834 8248 3112 33258 36424 39615 36700 38195 1973 39855 39839 46991 40006 2586 1486 1448
3227 26500 51048 42178 30137 11594 49607 24534 2946 10261 21602 29629
3228 26873 5922 29125 44659 26867 34594 918 3522 42002 34608 60184 42257 40418 45189 39876 36738 39810
3229 58535 2051 4406 1792 61832 77835 55235 42693
3230 50182 7738 32393 35688 84745 26749 24023 24022
3231 23697 32960 40702 26294 35970 75552 22002 41538 41696 3747 25453 1033 46675 5311 42408 46159 65551 35958 40971 47788 62331 36867 41854 60819 2844 31042 31026 89501 11310 52787 40075 5291 1790
3232 2996 27867 30042 12532 38419 28476 12053 5869 32287 656 32082 38437 7851
3233 48557 12783 30707 43645 24909 29446 35694 22031 43 8984 55648 56513 19053 42030 3899 6909 3941 11396 35657 46742 52795 10238
3234 7169 15454 5087 11748 1426
3235 8361 5964 12285 7627 40683
3236 24100 30664 23751 37578 25128
3237 52119 33390 27602 26108 4451 10612 11132 1258 27459 26603 24659 67086 45373 51273 38528 27072 35059
3238 67724 56542 53621 30231 54133 79465 52374 32118 89378 59651 42950 52358 31716 23938 44924 74561 60909
3239 11296 12837 1075 23035 23031 25187 12480
3240 26247 26571 10554 2947 2870 27610 41636 40098
3241 12743 50055 28646 39797 52350 42221 27068 12030 395
3242 34484 25783 9993 25781 15693 25718 5784 25871 51003 60547 17215 66834 55231 72250 36421 70564 25541 25546 82001 60330
3243 72260 35388 68398 47017 53243 63235 28843
3244 11667 29838 11891 41773 11297 21941
3245 39740 39834 39993 22777 22778 39470 10909 42794 40169 51296 59360 43802 8271 80005 78463 89076 80006 8852 35197 11 23600
3246 13085 86733 32232
3247 12883 8813 9454 39105 40300
3248 5653 4325 10797 38767 12987 3902 693 32371 40720 3477 22013 30769 1238 19068 42030 13 4542 76656 46182 35867 61164 22552
3249 58236 68642 76304 43367 49071 71014 66171 51240 545 58273 36583 24449 48558 62929 75330 45650 39706 45023 68462 80252 51296 71283 62409 71284 82045 70385 85502 376 8098
3250 90 12592 421 1127 7290
3251 38003 6155 28517 61246 46543 7938 28529
3252 6866 7722 5614 8783 24912 12402 21816 6880
3253 23074 32131 9054 437 8420 1639
3254 21146 12360 7087 38437 1628 70349 54896 34139
3255 13025 7891 12773 69828 30329 7196 3544 4050 71135 22637 27721
3256 35678 38479 26199 28905 7786 721
3257 207 24249 32585 25162 24256 21869 24250
3258 8221 6197 33530 19856 893 18398 28724 39016 26355
3259 38965 1478 28603 25467 2996 36157
3260 3543 8424 48057 74615 39253 700 11747 1805 8261 45790 28066 6387
3261 17156 19691 57950 65643 29676
3262 30002 1090 12490 27783 8885
3263 41867 1603 56015 27924 39705 17219 24146
3264 53873 46807 61387 5682
3265 40944 25393 2025 25501 35612 42871 35615 11552 10363 55393 932 7890 34610 41628 35118 7959 45298
3266 815 38874 18685 24606 10744 11118 26573 10904 47635 22842 43533
3267 33467 4145 17255 42666 22987
3268 4772 23099 5454 39846 36707
3269 44120 41373 42416 31178 33461 52055 48010 38173 44191 36738 57877 52788 40210 40272 46234 42490 49164 32407
3270 2314 45085 35919 8302 26890 722 11361 34209 9199 7282 35946 8890 5991 21611 11656 29012 9356 31122 41512 7503 9189 26832 11671 5969 23107 2257 7283 42024 11673 2311 7167 11660 35620 1423 5975 11370 11386 4616 2723 5535 11369 12248 11384 11385 23262 12244 5316 6343 36826 7174 7165 7171 33989 2398 12245 5294 4626 29289 27049 38273 8490
3271 24847 28089 5489 10156 7726
3272 3845 44793 27812 18590 18732 44787 67424 58720 51028 51041 38348
3273 721 6907 11207 8058 162
3274 7796 7806 29262 13847
3275 21868 293 251 25591 29262
3276 9981 9706 9780 9796 28596 1427 14871 1810 15281 7340 15295 37533 5417 6549 1885
3277 5586 31091 5591 32130
3278 42099 29426 12840 6190 10739 27537 13056
3279 49953 7599 48881 60363 66261 75884 75450 72366 65989 56465 71649 49418 66700 84348 82018 73321 71815 38531 66308 50271 73320 87587 73322 61643
3280 41396 19916 53652 32716 8236 53665
3281 71142 39213 54309 64358 78258 17400 11084 62214 62065
3282 35471 5113 2017 23373 9476 705 1371 28140 669 2169 23077 1744 2114 5340 3466 29356 34829 254 65942 24398 15394 24907 9861 5444 29357 34445 35981 32005
3283 4569 41680 10693 35130 26802 1091 5937 27080 35114 613 12360 4734 3514 55392
3284 38193 38449 10676 12848 37922 1288 40417 39773 38198 37085 39786 69429 39779 30163 11834 39798 5885 39599 864 26433 37355 81741 34387 39938 35370 23476 34813 56723 22692 11844 40418 39690 34390 39866 40059 39985 10662 40002 63827 79872 49031 37929 40030 38201 7923 35058 39926 32092 22800 34136 60521 77866 11902 42015 40280 29191 7948 22872 37420 42017 52678 57970 40250 78266 29966 50890 47637 57983 22869 59381 54458 54026 50480 71205 50642 47250 80865 11863 77490 91556 51677 70540 90790 26694 34142 90341 42206 91119 62415 9316 6531 5482 1657 35104 38073 33984 25409 1793
3285 20237 11566 31564 21138 26845 12256 22288 43939 546 37948 430 35907 38190 6190 11819 12843 19517 41863 41865 40727 8336 11865 6155 52196 3452 40022 3027 43080
3286 1559 8323 1573 702 11744 24351 164 435 5837 2080 9360 8509 26888 8391 6637 6718 1582 6633 14408 220 23143 30837 2379 5182 12855 26512 5676 2872 8860 40965 8870 464 9367 397 417 10703 8471 5202
3287 6888 11480 3651 220 5784 38988 48907 10609 23928 30713 51061
3288 76439 24887 6637 60912 3773 11279
3289 23526 11816 34884 30367 13006 5889 4423 65942 21567 33205 27068 67620 40303
3290 13936 23321 17442 16443 63890 74479
3291 8582 13012 20326 30947 7964
3292 1014 2831 12746 42479 24174
3293 12453 36705 24362 28158 4647 46282 32390 70349 47636 2046 37587
3294 20565 25500 79034 35289 34430
3295 5989 164 8858 12446
3296 58331 39567 50195 48218 11196
3297 3910 40292 22652 22774 56311 46884 57972 43257
3298 4879 7425 8324 38920
3299 24790 6984 28922 714 9163
3300 32579 23701 11713 38371 36504 23383 10614 41375 35797 4839 30010
3301 30219 37144 51770 30204 40039 35569 57591 11865 36118
3302 46629 527 4956 8896 2591
3303 33713 57807 10790 73 35387 10826 1911
3304 53536 78235 7501 12752 114
3305 26505 46002 13004 26996 35919 8910 1428 1170 38887 49795 85417 49150 33129 662
3306 34806 22777 32189 24202 5471 29793
3307 28880 62893 76848 76638 7511
3308 38663 61027 26923 12284 12265
3309 35780 47464 52021 28717 25287 42924
3310 46850 21597 39995 29184 55594 33482
3311 5733 5745 9223 5146 24063 12669 21997 10511 38874 12804 8214 44021 12999 11594
3312 6376 12644 23503 670 8825
3313 46721 42320 45314 22567 22672 46752 22564 51827 67581 11837 32427 34390 39587 22495 39684 34137 6494 43251 39600 36084 36646 9023 11167 43399 9012 41853 33715 40108 23943 35058 78317 11196 36737 39833 39712 31156 35566 40044 22863 43155 11178 11168 40168 40268 22938 11867 61183 42260 35571 59355 11871 43803 22922 85291 42323 6486 8785 1427 1069 47105 24068 5445
3314 7491 5467 6766 16677 86552
3315 45349 10132 36286 63585 11189 32624 11518 31976
3316 40021 40025 37248 36890 39791 40039 11854 11187 40125 40109 34950 40205 29207 40052 40113 40129 29741 43457 25158 42019 62301 57284 65540 75563 52915 34020 82944 40240 73185 88581 40275 40206 37434 91575 83359 82159 7974 33491
3317 8836 31390 70107 90879
3318 57464 54622 52969 51446 50526 50519 52948 64508 46705 56376 52850 71838 47671 21146 88454 53655 59576 85264 31874 7926 38753 59465 77516 63161 63174 58358 43772 38955 52463 83401 54843 38961 41818 62949 73670 66487 73680 72705 84666 71586 70729 80531 59625 9059 9061 13 27369 29676 25123 10877 51408
3319 31727 32191 55067 22969 36035 5248 12206 21817 5103 175 17476 29539 12241 4675 13004 13048 33452 6887 30017 4598 7441 144 348 5662 47447 23976 27529 643 6909 17 610 68 6827 73 721 7228
3320 12031 1976 1032 29526 24781 8831 1099
3321 18006 3642 42495 11388 10690
3322 11901 24220 41026 5661 28847 38030 25147 23175 24216 42641 4827 40670 5660 24454 33300 57393 1688 46910 21604 23116 11928 10852 30488 4976 10701 42110 34677 32393 6448
3323 14419 18520 7628 56925
3324 7898 22238 75659 32754 1013 24803
3325 31713 11851 39795 39727 29192 37434
3326 1029 33117 44525 46861 23697 29870 10388 30039 956 954 35109 10 1658 24505
3327 59724 37363 40172 40163 40165 52681 62442 28206 40239 37424 51462 62981 58873 42523 7958 46575 40201 35257 11189 40228 51851 57976 8271 40254 10909 42398 57979 59382 62982 47773 59355 42367 79364 3266 3659 45263 62984 47640 52745 50591 11191 59377 51768 82012 91123 42261 77490 35572
3328 8213 30219 8164 29702 34209
3329 23038 37199 1024 8391 11776 1806 74698 6190 1367
3330 11743 11204 1106 50774 28953 12628 31927 1648 40930
3331 6984 7377 33211 23053 21298 37118 26540
3332 42781 40038 12372 28880 23751 391
3333 17183 18230 27540 893 894 20911 1866
3334 39591 6218 19015 8872 4781 28269 29667 66590 8623 30317 33917 12462 28065 6387 32361 31948 438 7483 7472 27213 7484 12004
3335 75216 32646 81955 7633 38871
3336 41524 31620 1182 1465 50561 9782
3337 5535 18036 24103 51984
3338 5252 35397 312 25533 5145 6884 16637 22394 8873 10667 17025 8985 46088 2474
3339 8815 18947 6658 12816 19059 10463 10583 21595
3340 56510 30638 25508 47422 2203 51344 34683 43402 40088 39995 32092 40677 32392 40241 82126 59354 50474 91250
3341 38829 45020 42368 29019
3342 33851 24728 25303 41991 483 28264
3343 659 1351 23031 1647 6315 662 32608 7518 25363 10706 1676 34110 6464 29974 26759 1449
3344 9369 9187 9194 28562 31610 22025 1920
3345 6267 29602 32699 33466 32387 40110 35090
3346 220 6020 388 3075 40472 34629 40764 30127 11208 5597 31072 15339 21866 136 105 30125 31763 15347 15557 30128 24923 292 30124 27219 16073
3347 2629 44517 5653 504 21650 90 13461 9715 52405 66513
3348 81014 89837 47281 37930 6774 82482 7430
3349 28511 52543 4758 26964 42364 72405
3350 23206 23202 36869 1364 36618
3351 57233 62824 7974 33793 12029
3352 51764 35565 40194 40195 91540 40157
3353 9494 8676 14093 9713 21477 2167 40685 16242
3354 13092 23725 4797 6533 26105 29982 11888 33995
3355 78482 57314 57363 41987
3356 5351 2024 22038 13334 25527
3357 35639 6339 28147 23660
3358 32813 26910 22244 22005 45522 44952 41671 12205 17940 26950 18973 26596 4712 16010 38096 43298 41185 48735 75270 33442 32691 22022 10303 31621 49205 4710
3359 49978 21136 67729 45902 56087 60526 85423
3360 39764 29148 37418 65466 39942 24800 53978 55594
3361 27068 36499 43583 23631 83838 42231 72993 25385 6567 23613 6877 15358 3494 4457 56291 7053 16682 3076 19212 76169 25109 49828 23607 35317 7996 78953 68008 23643 45616 35686 30219 6501 8749 20 11836 4211 11861 63860 7439 29606 21050 14959 32757 29720 11868 7090 12706 72881 55153 89357 32494 32404 71813 52693 89857 22163 35549
3362 10910 33254 61633 29202 84031 63685 59381 32406 52608 40125 33021 77460
3363 51651 33634 50770 22812 29184 33641 35451 42118 35498 45583 35573
3364 34833 4871 4803 6285 6373 6370 6371 4874 4863 22226 52506 47113 20833 38193 29379
3365 1402 5151 37084 7195 29604 1688 29911 5149
3366 20304 23477 48262 20987 35302 52028 23642 17656
3367 10815 39779 35856 31718 28644 79318 20330 76343
3368 11296 8502 1372 46393 7196 25144 73 211 13575 643 7502 2102 551 660 103 23076 315 27497 34560 24914 4958 5466 4604 4592 31877 6517 26757 978 38 34263 45500 7882 8124 7856 168 2095 13788 223 9370 2196 23070 106 12034 7216 6453 135 141 13874 24994 43726 6344 10183 22314 8465 6137 113 21927 13545 225 28830 60 27505 279 1234 6057 4610 5839 22330 5988 602 7879 1430 1207 12890 1127 79 27535 12891 22025 21879 12318 200 9367 27694 5742 105 8619 5643 1364 390 14084 5729 1384 8139 1450 8903 32830 26980 4659 12257 70427 54174 61428
3369 17540 644 19565 12369
3370 20228 43725 19120 71425 69016 50087 41397 46853 52418 83416
3371 39708 45726 64726 58633 71269 48305 64740 76672 40297 71278 75233 67637 80048
3372 78391 43745 65193 56905 71318 76643 29368
3373 6010 15066 30010 23441 30033 8389 1243 8263 39237 15166 14039 15216 11046 28419 7518 21526
3374 5296 7308 11363 3818 23801 9331 4577 24454
3375 22312 23995 5436 23041 5644 7995 12327
3376 44068 890 7129 9002 13004 10381 52463 12489 36222
3377 43744 1491 1492 30680 483
3378 27069 35831 44757 4276 5117 33634 80548 28125 5924 6083
3379 32612 22520 13023 54206 22810 13075 28418 12480
3380 5391 5159 24926 6001 24928 24726
3381 23080 40293 1354 25008 33042 396 12216 36565
3382 5352 23993 1420 2442 670
3383 28956 1728 32793 44677
3384 40123 53978 39866 42259 78750 28638 40233 79950 80592 61524 38331 90115 10067 30239 10173
3385 3635 10773 32819 23989 1544
3386 23845 4051 33306 41834 23779 26856 36711
3387 16746 16727 16766 16592 16680 16744 16519 16735 16321 23838 16534 542 16895 16935 16911 16898 16924 16925 16953 8140 8192 37304 17110 17087 17158 17214 49293 16010 17245 17112 17818 17863 17905 46154 8695 19671 20452 7522 27927 9056
3388 4088 17067 10323 41359 29922
3389 11103 46429 35614 11093 19687 10097 7107 28638 33428 44779 42481 46564
3390 38898 3029 11583 28469 7259 3001 6152 33005 2688 4872 7352 30826 73746 1402 23017
3391 33713 39786 39619 11849 37563 33720 54904 40109 40235 61145 34950 40115 7964 45470 52073 35066
3392 5204 1653 6845 7441 14653 6790
3393 7210 890 37629 41847 8454 38092 8269 31156 32080 114 7760 26781 36591 42398
3394 4302 31817 8221 5866 46826 19049 10290 36964 22236 2888 10540 18985 35984 10282 32446 20001 29740 19131 19173 12690 40693 19417 5872 4198 47503 33400 27626 24576 41180 33401 20220 10328 33580 5892 42584 37992 22269 36930 32727 5259 20337 34522 28627 33067 42150 43955 21554 6494 20841 36262 10344 10341 10342 23587 11592 34587 22206 4751 34543 63979 53468 91539 42223 57161 25222 28370
3395 27824 483 8205 1539 37581 8380 21616 6346 36169 21610 890 30456 4797 6936 8601 1954 6352 1252 1550 23128 4806 8390 2427 8402 8416 25364 42755 21471 1595 617 8221 8329 21667
3396 13069 1595 31351 43728 25357 1539 1550
3397 13042 48892 49915 1426 43239 45373 23987 23998
3398 66680 16691 28739 61072 61073 62562 86622 57722 17624 88535 55658 55821 83830 51958 82393 18773 48500 67293 50519 80523 40692
3399 78715 5731 25410 8780 382 21659
3400 23538 35160 10569 13157 43360 41498 46299 44931 21579 7942 47773 44156 32400 28854 5599 28418 27016 976 643
3401 24016 5328 30087 32373
3402 8384 7727 30460 30454 30456 30482
3403 30715 39878 43455 33462 35450 38252 32400
3404 18453 29457 5873 34576 29348 46546 21597 39731 39837 33720 50293 32012 40021 40057 9769 42804 23847
3405 67179 41397 68044 28538 54864 13741 42705 36581 56904 86198 7522
3406 15225 17064 17366 8210 3374 47847
3407 25663 2160 14089 25641 25660 25655 25637 14060 11283 14352 25683
3408 7972 10278 7894 18640 40907
3409 332 88536 18638 10763 40993
3410 24474 40319 23647 10927 43425 51862 24364 12536 32238
3411 4074 26756 1267 7925 53181
3412 29027 7288 1352 640 36058 1970
3413 23586 1227 5204 7129 8263 8958 26650 2832 7782 394 25376 6595 11 6887 196 47761 5625 3165 24954 27244 6565 11999
3414 59472 59473 59474 59475 80490
3415 1924 10750 7156 9975 1063
3416 5728 3224 1174 3343 3351 24059 3416 10723 3574 11797 11082 9242 17804 28125
3417 7588 32463 32465 32468 9139 13660 28980 28982 36094
3418 37421 59613 34139 69116 81930 48234 59378
3419 85590 57314 64342 90325 72505 91521
3420 6933 2192 4207 26851 4095 48745 36066 41846 6490
3421 24264 15050 28269 32446
3422 2100 23781 1806 29506 8326 1465 25043 28188 2379
3423 42040 44073 23640 17637 33467 7950 30218 38
3424 41464 24156 954 959 11200
3425 26261 39865 45350 45296 50471 40072 42221 68630 43774 57288 44105 79364 32401 87542 32567 50652 3887 34064 5736 23660 28147 49690 9557
3426 8934 34610 39944 39995 27605 40078 40073 36710 37421 56918 8128 40240 39849 54456 30139 59351 8271 30988 57807 28638 47640 38826 34399 44091 89815 53506 42718 91321 90197
3427 35863 37698 31155 79497 40348 44585 81381 35443 23593 67283 45363 17798 44108 52873 44477 9484 49828 51788 12838 45207 55432 18508 32943 23618 29715 39200 42214 12369 20578 9492 10382 58252 39139 39911 12372 30207 44402 43317 54987 33721 63826 11837 54649 43583 50614 36301 37410 46232 9021 50763 7718 48094 39596 51276 67197 75337 55165 72831 46830 52156 75339 13519 39677 30967 30213 8011 28373 50408 55962 27244 43040 61238 43154 14012 6890 23611 35849 35850 43364 45844 77671 36551 58121 40270 30247 44928 75917 87476 72639 90947 36874 76774
3428 30030 47767 3863 23383 23096 1229
3429 26756 7906 12258 24193 3496 7950 6076
3430 38409 31820 38095 39893 29516
3431 33829 24512 35586 33147 27084 27333 11888 667
3432 40062 44102 64601 57293 77232 33485
3433 11298 43869 1042 32322 5272 5276 5326 9319
3434 75530 71136 67881 78153 90059 88228 27945 86914 7582 64997 63050 49109 82383 32815 33350 49016 34700 82048 44310 63052 39516 88478 69762 91491
3435 9649 13062 32356 37748 975
3436 38036 6501 27672 10826 31124 8749 954 5469 11279 10867 987 1871
3437 44414 33087 51053 33085 51896 33088 33100
3438 63735 54369 26083 40881 26076 16136
3439 39492 38955 71700 84730
3440 27238 10182 16672 32023 34965 8825 6585 10190 8194 1252 56417
3441 474 496 8192 2519 10791
3442 8033 27449 5182 23814 11982
3443 24849 7208 10793 28468 5654
3444 50417 7950 55591 10400 53054 5103 22364
3445 53640 35383 64620 61569 57780 35390 89855 9594
3446 42598 31212 42600 11553 26625 48478 11570
3447 13589 18768 8194 5868 536 44438 43040
3448 1708 1761 5247 1727 1667 1673 1688 3670 69095 29857 1782 980 29525 1457 1695 33997 22398 5976 6444 1640 23986 1438 2996 1648 1701 1672 1686 1652 50229 1626 28539 681 1447
3449 7630 12794 17742 13119 10526 32631 27588 18155 11057
3450 4303 51021 54966 12813 47452 51640 27589 1866 79029
3451 23863 9394 38078 8932 23079 12097 30086
3452 13047 31130 123 280 79074 36630 47113 895 41234 11149 1911
3453 12845 41863 10103 37492 22546 53412 25518 37346 26307 11830 39511 11841 39712 36710 39807 39718 39654 33474 59375 39763 42019 40168 44167 85505 47169 33491
3454 11965 11400 10025 4524 85357
3455 22286 30939 2772 36118 9333
3456 45010 7035 32175 46661 26189 7156 34445 25023
3457 38453 26771 8595 25391 1743 26994
3458 26947 1314 36498 33738
3459 41185 35856 13049 41187 30980 44166 41789 44151 46237 46763 64702
3460 6519 21894 5628 9121 286
3461 45171 32256 22973 3103 10874 4197
3462 28335 7412 12496 11332 10750
3463 74695 49042 47850 61424 30559 8368 64807 3965 58163 74659 46587 48958 69941 41260 32689 64175 54118 80949 63939 74024 74700 21592 40837 43340 56444
3464 34144 73936 5115 35102
3465 5625 11631 13025 35527 35720 40924 30797 20465 23545 683 39016 45609 57578 43903 71011 5087 66615 36669 31356 12940
3466 1164 13047 8326 23848 8061 33316
3467 4380 871 27622 10843 43321 41440 34670 34425 34333 25499 48954 28279 5182
3468 13156 10095 34538 6226 6232 30744 32880 41254 19068 34586 51297 63136 50641 51769
3469 4839 28421 24718 14904 3164 8888 161 12524 1838 33950 9413 12897 24260 1406 2632 8489
3470 87541 19220 14946 20729 66754
3471 55 49 215 28270
3472 35727 33715 7470 8816 9018 39837 4215 39954 40106 40101 59368 7929 90791 91385
3473 14495 46247 10176 23757 6724 2374 6773 2196 2375 14452 6722 2321 10199 4892 41032 24313 27049 272 30411 44048 6782 6762 6783 27900 27914 7550 29544 7170 2455 14968 1002 7877 14781 6742 15199 12551 36764 25086 6788
3474 23159 11043 6385 12093 8896 33848 46501
3475 27029 36228 6044 5326 41861 21582
3476 58336 39924 65180 46139 78186 43522 63194 55838 65598 34801 58890 60757 52833 51946 50486 80532 48491
3477 14465 47827 1024 28827
3478 47762 39114 26472 61857 32070 40047 29177 40150 42015 11161 35055 40133 35058 40171 33261 39976 37423 54457 37424 57971 40223 26689 7964 11180 11183 40170 40240 40129 28201 57289 40236 37428 40250 57291 11191 40678 29202 50537 57984 38915 32622 38100 66737 77232 91557 54462 32403 7970 57293 87461
3479 11276 11264 11270 11267 7826 10984
3480 21255 33413 938 33542 40022 32396
3481 4590 31930 5645 33319 23802 31317 26742 220 27445 26598 33752 1648 13750 8045
3482 16209 28204 57211 50381 63710 67212 73012 32084
3483 26696 6647 26458 31753 4243 53797 23139 1700 25380 34864 29426 12373 40927 1732 28963 26593 32498 22135 27814 7153 26727 7217 24081 10725 43867 6913 23976 23025 392 5586 389 658
3484 6909 8629 395 8657 30449
3485 4839 5859 707 27294 20750 6214 10353 36263
3486 78284 71597 62181 87961 49684 84353 56936 82828 82829 56476 88370 65597 87557 73814
3487 26813 30997 41908 40497 61378
3488 29946 42697 42705 46093
3489 2490 19306 10592 7972 2119 61449 27739 87677
3490 36205 1595 52388 7024 13038
3491 27181 8936 10759 10198 8920 38898 5471 8395 26985 28101 27206 47176 26799 43348 1389 28187 11718 28091 662 7720
3492 13964 3250 11744 19565 17250
3493 2403 19626 20298 70287 23710 26062 24000
3494 364 36488 13001 8608 20574 19840 23751 37134 20071 27718 37119 1253 10337 10260 34724 11113 31698 30710 766 42589 46748 3957 44112 10634 43366 46963 46764 10132
3495 496 7364 55565 50475 48802 58063 77753 68139 68163 74828
3496 379 33051 35995 23145 432 31539 31538 31543 2186 59340
3497 31457 32035 12511 3986 41303 7300 1814 4638 28432 19267 35011 57263 1252 27616 30621 32054 21579 61005 53817 23939 67487 42420 21138
3498 39086 38265 36591 3471 47932 46754 19986 2583 48961 67612 2706 47747 37128 90579 24210
3499 3559 44945 3523 3326 23498 10726 3726
3500 24794 24661 24675 30504 30508
3501 10629 17923 41079 18006 18070 9254 18101 54097 18189 16754 17795 18672 7681 853 28719 27616 13192 8217 17836 25111 516 4424 18689 39664 18757 53391 9037 50397 19486 19271 43815 19570 48852 20073 20098 6837 20189 30615 19911 61387 62983 7896
3502 9100 20183 20773 21180 28802 28815 40196 40192 69080 73358 29
3503 30867 29171 4075 61475 7946 16961 27911 68643
3504 4971 13191 28216 4983 14247
3505 32382 11834 39750 33251 39543 39688 39761 39633 33448 21597 39620 27073 2203 39642 39710 36700 39675 36561 39692 29155 3548 29154 39936 39701 38822 39697 39807 43525 46882 39641 39811 46075 39826 7921 27072 32012 22777 32125 7941 32393 40242 32565 42795 41693 40000 42202 40153 7935 40253 40255 2372 40236 40185 39941 59354 47638 50537 56895 32396 42020 50473 83531 45581 50651 91415 955 40199 40152 84745 57989 45583 32566 57978 10905 54463 87632 35452 90112 81152 76385
3506 18678 48811 36171 63459 43185 9021 42821 26261 4444 41009 19232 82038 32860
3507 38529 67149 75146 28812 61440 31960 27927 21762 27926
3508 10480 28172 6395 32572 6785 16491 16290 16763 16816 3691 8578 29103 53295 60269
3509 27068 61169 49151 38824 32118 36641 33467 41185 28315 73735 62404 32117 33795 36085 29718 64311 60820
3510 44192 29709 57605 45368 61865
3511 8493 10479 9105 434 29643 9657 9153 266
3512 48398 53945 70332 53038 89330
3513 20946 496 45633 52463 72638 82157 81131
3514 16540 15689 16850 27593 16935 16918 137
3515 69278 770 67276 32052 26878 23634 51510 3246 4166 60888 47823 51292 51295 46559 68551 54454 30761 12434
3516 32126 62409 11108 40087 28206 79358 57878 40245 65467 81153 90668
3517 28182 29338 11721 11715 1372 27304 25444 11725 43104 25450 43105 12928 11714 31382 11716 31389
3518 3053 2805 27767 38832 31775 2821
3519 50121 10701 7890 61445 55043 39507 11609 11613 3021 27423 43578 11605 39519 39650 40593 34776 39984 40048 50293 29192 32069 47823 38979 39585 40070 29195 40175 43800 49160 42222 76725 42398 40244 42259 83534 83533 79364 47250 37430 81495 11864
3520 30542 12472 43907 10713 37008 43114 11928 31049
3521 30455 36609 26759 9358
3522 39884 39805 39973 39744 40156 33711 27429 39876 26233 28802 39823 26210 39922 37412 29162 35372 39605 39801 39969 28819 39968 40036 40041 40063 39974 39928 40053 40090 39925 28815 27431 40126 11187 40127 32067 53873 40132 31717 40094 33461 39941 7944 40071 40197 40220 37930 40196 40192 35565 63684 54249 58916 43698 36319 57979 40191 42398 61184 40219 62219 46890 59372 53721 61187 39232 45122 82013 43700 11864 42223 43626 81152 85160 57876 63685 91417 63686 78052 84480 54464 82184 89434 41904 82653 60260 71779 6921 10867 374
3523 25317 1355 374 16964 7507 21638
3524 1402 31776 36714 11628 12761
3525 62414 75108 75117 71276 80261 87575
3526 13062 24766 5725 33952 35995 5655 33056
3527 12151 7374 31040 4387
3528 6899 150 6789 8066
3529 461 9679 24324 2167 27216 2148 335 2318 13913 467 29301 10877
3530 39644 55044 22926 79950 24137 8012
3531 1370 1367 1639 447 413
3532 33091 60529 23164 68802 30253 65955
3533 55513 90793 66353 88888 72799 89098 86626 77485 90308 7871 12461 24768 6910
3534 29887 5964 380 10754 728
3535 6513 20323 50618 25296 10826 11954
3536 23085 33746 29426 42666 37464 12794 7210 1681 6347 35131 1700 1726 5645 32799 22133 42655 45795 377 8570 46394 5988 8922 388 26176 2410 31978 4740 3759 58687 5767 6495 7228 175 42980 71588 4739 10651 29478 35421 11532 23809 10734 30333 30984 30875 54150 8998 1256 31537 8910 20746 32522 5966
3537 54180 39782 51267 35796 39642 54176 39943 42218 22778 44932 40096 40232 39976 59380 79359
3538 52483 9528 21152 7130 51631
3539 979 7004 30632 32206 23773
3540 15144 1140 12843 29946 86274
3541 7337 32219 27039 2555 1010
3542 27693 6580 7906 1427 8082
3543 433 7879 10519 38880 150
3544 1260 10396 47 7408 25185
3545 2838 24203 12290 37775 5108
3546 39961 39085 64939 21542 29965 38192 52920 78462 7591 59234 36893 8241 59651 19816 1072 78151
3547 7919 75001 61315 43245 28883 43808 90327 32702 12156
3548 71568 16204 61225 91579 8184 18218
3549 67994 52662 46838 33892 46839 68007 46842 38156
3550 16138 9905 33669 17758 17777 62691 82876 43
3551 1603 7803 1492 6906 4936 8040
3552 40393 767 21563 39158 39424 1407 24141 34557 32608 21931 28923 40762
3553 14330 14472 34947 7583 14423 14546 14534 14523 14322 14645 28005 51409 14690 14733 14470 14706 46326 9789 14811 14977 45869 14971 50622 15439
3554 18610 62470 48025 18791 26377
3555 47418 31272 33377 35981 44973 4325 44671 27629 44537
3556 5797 41387 1833 26022
3557 28611 6196 7788 40377 34508
3558 22660 71530 83630 392 3464
3559 11 9155 24856 36003 28215 24871 32864 54232
3560 28827 41029 12479 5998 28910 25149 9200
3561 23156 5604 26581 7410 729
3562 1786 23311 5043 4996 4935 5476 34122 5061 13516 163 26067 27692 16726 9600 13961
3563 29771 29763 40304 32175 21762
3564 118 1120 1707 51400 1364
3565 48014 1383 1427 186 373 13 114 79 1013 40288 27445 22996 26935 37024
3566 82788 49659 20634 79671 51821 52915 57867
3567 28988 32104 10333 39390 53437 6338 24012 12498
3568 23307 7410 38 427 195 33845 10775
3569 53179 60225 4034 12688 32662 39275 9272 33411 6494 44938
3570 8437 527 4956 1924 379 1074 35890 114 5670 28591 28152 1781 11
3571 28389 4803 27782 27213 4811 36828 1574
3572 2142 10189 6906 29369 427
3573 43816 51160 72 5883 23629 87269 24151 10657 8166 44974 33792 52732 39659 55922 40144 50649 40069 56306 11858 22909 52384 39755 40018 33506 44104
3574 16964 64372 3778 35350 24282 27072 45090
3575 7930 5252 49872 59401 4633 26852 31910 26571 23003 5151 55916 30667 10704 11328
3576 41429 2226 30418 23955 13181 7327 8550 8056 1352 5654 7761
3577 78509 44208 2963 87701 77093
3578 5693 14717 15783 24265 21828 2134 21974 21829
3579 54083 55874 45632 43224 51703 18832 74043 49870 46489 49462 66257 71686 57308 66680 66023 67075
3580 17845 19730 20186 53401 43697
3581 8083 12893 34217 13085
3582 36984 6243 10394 1340 26432 24668 38633 39404 11139 10402 29148 11841 39779 12849 39576 39541 39582 39683 33715 45295 39847 726 42794 39848 27720 40124 61187
3583 7194 10701 22460 46294 5511 26964 36043
3584 34102 4857 56236 51487 4642 45446 71514 83738
3585 45311 3468 10559 13025 45720 30200 9260 4884 5326
3586 15324 15376 15841 10611 50060 8693 13988 15757
3587 27712 10388 37144 78888 27834 5615
3588 4998 4086 45934 27554 66119
3589 31721 4555 14141 12423 71973 1900 1448 1713 32588 684 14 8104 11901 118 34940 9803 7436 25438
3590 5456 72993 52089 38393 14805 6910 11941 438 30535 7871
3591 4684 11799 1220 2832 29596 7705 6231 1279
3592 183 7812 11263 7819 21760
3593 8938 19434 5858 35843 82155
3594 38448 36126 7102 44604 32334 43644 11537 55034 80368
3595 7504 5676 703 1545 23074
3596 2957 4292 17972 4866 54856
3597 4396 8215 7078 4410 10540 4467 893 19165 12715 23767 33530 4341 12724 46989 36491 545 23577 20407 72216 72217 38247 36810 35056 39951 36283
3598 7456 19174 12640 21677 1275 22202 22457 4474 78401 11785 20820 20582 44041 37698 36551 1879 28871 30483 4051 11877 51400 2645 34181 31276 5913 65979 31282 48744
3599 55050 33766 1822 35682 3909 42539 44197 23418 8455 27068 29667 12505 7250
3600 8637 6918 41297 20278 38641
3601 6554 12121 29694 7868
3602 7809 5182 28587 33741 21659 10811 12320 8318 27732 8626
3603 53355 12418 29573 37016 10826 24166
3604 42012 36978 46733 42585 38968 39346 4458 38414 11547 35265 10373 10558 27387 10658 9001 3512 11807 34360 44667 41628 39472 42068 33242 42083 33247 51263 39555 32059 39691 32740 3707 41296 45188 1403 10681
3605 4119 7394 7269 29025 12230 4356
3606 19249 58461 48061 11100 20341 67605 51095
3607 20893 37542 41153 28742 44071 19317 13457 13857 7522 36567 20606 23635 20742 21179 82800 1565 51312 62331 30584 40204 64228 36451 23171 49288 49372 11113 27702 27707 37927 73541 8193 30780 35800 53873 39977 20179 10109 32582 35372 19972 48175 25196 78860 6910 69678 17752 10224 21794 9061
3608 7919 38825 7906 7938 28928
3609 36698 42599 24301 44199 16820 16319 13009 39900 61389 27302 19544 62936 50416 6931 8841 13055 1649 7468 36917 11182 22294 5909 21134 47238 40518 2379 49809 8036 47154 1866 57931 48462 59992 40183 29961 28880 83450 82350 28306
3610 388 10826 7505 12464 114
3611 20324 30375 35280 25214 5608 44 1069
3612 13641 10623 12794 8221 3913 15588 52567
3613 4735 44611 34578 31689 41672 30159 42191
3614 379 5964 1539 8205 1606 29524 28265 33912
3615 6908 1555 7227 1090 38269 7209 29694
3616 12837 29488 49042 6201 12824 10384 33793 83122 7471 26935
3617 53420 63355 41631 4811 37748
3618 15431 15816 34155 17530 8814 9893 14906 54739 52060
3619 75791 58155 54195 38296 60164
3620 55057 31276 30218 91285 31619
3621 8106 6623 439 31331 7407 31886 6292 96 4922 7399 1539 4990
3622 35440 9001 42192 31751 44973 11120 7892 10660 53416 47530 44361 47773 43042 41481 33968
3623 4184 20097 26575 6365
3624 39989 40171 40223 40084 40224 40227 10919
3625 40183 72432 59853 41262
3626 32843 37533 9352 12882 23160 30496 30315 13851 2323
3627 5326 2692 30670 23864 46613
3628 36392 19199 48923 47694 389 12334 10144 23137
3629 15573 28376 31352 43631 154 5097 16406 11892 23143 6714 2112 11904 6773 80804 35467 6779 12871 41707 46114 7667 7674 43740 4968 6769 18085 528 11899 19409 12371 37899 25401 7891 17642 23484 18534 49029 61851 166 172 21133 11318 71410 19862 21320 42909 21959 11170 34773 27421 32060 62659 33706 23333 25157 44324 36736 8221 74633 10301 73495 46508 40329 40234 52092 21276 40107 47146 36277 13795 8660
3630 42039 35339 36237 67273 11829
3631 41887 50196 47258 47823 50293 51301 32394 32397 50480 33508
3632 60405 17329 5626 15682 21765 17077 17780 37762 86182 7628 17502 18377 38617 21483 31804 16952 46959 9044 12189
3633 2033 1983 60264 9782 24259 47923 1858 3686 36347 9384
3634 57970 52460 44528 51761 8825
3635 39425 20806 32113 43395 20514 47644 33075 59647 26269 69280 63459 51807 21225 34855 59354 46043
3636 36778 22461 32885 5662 64906
3637 16727 668 48201 7705
3638 10708 17084 43870 33976 29630 31101 59233 1834 28963 23971
3639 10590 47506 69679 34555 21598 604
3640 150 1535 493 330 461 483 5384 21854 34299
3641 1014 1707 1018 44 5370 41477
3642 8380 40415 1798 31615 673
3643 40074 68630 40241 42016 39898 56895 47637 57977 59382 42719 84745 43265 37432 91557 32405 45584 7986 6534
3644 40289 12371 44944 1252 688 36383
3645 7834 11152 2168 33705 27786
3646 55 23895 35693 775 670 30002 31579 24232
3647 33366 33365 32243 432 36128 33943 22099 23770 43440
3648 39234 32399 47017 42719 53626 42115 36856 29795 8413
3649 5653 23740 5337 12187 1465 8476 7298
3650 49097 6199 28151 3882 37698
3651 11493 32044 7440 47823 51466
3652 23536 20574 38510 61225 86952 39781 51766
3653 34251 8850 1926 27786 23772
3654 20005 4117 14139 16090 41327 49781 16228 45876
3655 11128 41335 4526 55402 673 11777 4795 38921 38920 33824 66590
3656 721 46594 31 119 16
3657 21876 8677 9742 14760 44342 47232 6717 14752 14891 29181 14720 14946 9134 13922 8692 15065 28949 15030 15222 14473 15095 14953 15276 14453 47108 24327 49001 16021 21917 16046 17186 17814 18408 1561 6747 5367 1 12462 13 114 10792
3658 29929 39464 31173 10139 47801 31276 75563 59599 26692 32407 84932
3659 33970 9997 32219 1460 35701 16067 15268 3177 8991 5681 46011 11087 23138 391
3660 14170 9798 6023 9858 38291 19610
3661 7972 41627 39518 47400 10674 5650 13134 12971 24196 27613 35408 892 36670 34572 31969 11068 48445 39717 32619 39545 39753 3548 8270 39757 90668 39986
3662 22156 14761 9481 13654 43910
3663 576 1431 834 27799 6553 36358 39254 1576 7008 49091 35934 32175
3664 21814 6880 5596 21816 29497
3665 5448 26540 7787 6983 25299
3666 24712 23503 9400 28441 8298 9388 29004 26484 32231 29006
3667 32910 37521 11800 2832 23036 5078 4867 8866
3668 34428 5682 43399 35927
3669 12695 36254 29110 36524 4125 25484 36545 24547 10281 34690 12953 38469 19417 881 41366 34521 4720 10744 34762 22587 24279 36736 47773
3670 7457 7973 1457 36801 376
3671 67679 78999 7710 46708 60357
3672 10063 9290 10113 46752 46492 3675 42950 29199 28828
3673 5326 41156 33936 51342 29959
3674 3821 3758 4718 22233 10024 27048 1296 35661 44167
3675 37561 21305 53977 43358 49634 27354 20184 13024 49708 28045 35776 10596 21423 41405 49706 50457 9042 2923 26802
3676 11839 41435 51260 8627
3677 22601 62782 44980 47800 50183 60185
3678 46697 64242 48178 54612 42726
3679 41371 39460 50191 3361 32122
3680 23401 963 5225 18026 43645
3681 67472 32517 48605 24701 27235 21659
3682 75822 40872 29679 39076 9056
3683 732 14469 26665 52627 556
3684 1201 27020 36356 1723
3685 2268 8123 2374 2295 8517 10519 33560 25487
3686 8190 12783 35019 20907 12454 48920 69100
3687 1838 36952 14186 62222 6346 15368 50344 5225 46346 89785 74584 52199 70110 44392
3688 2379 2374 11664 9787 5087 30549
3689 31130 5677 3073 6538 21631 1795 23122 12152 8442 58689 9367 24834 6159 5103 22992 34830 393 28290 6927 8872 1541 1592 1555 1603 8278
3690 66189 75403 56576 48950 68828 77212 83119 70437 80838 21422 37899 66492 20619 28786 20927 48390 47655 82220 26035 79179 24971 44431 20969 49979 51734 48001 47971 70588 49984 76708 36148 56577 72077 63631 28039 43674 73801 78738 48111 72946 71540 65256 84080 42309 42313 81972 59492 55624 71965 63702 75392 67745 48108 78141 55115 54520 85706 75418 27405 70438 49780 48726 21308 73080 52560 71497 21217 20703 21457 52933 42930 49982 49935 61635 75369 82852 75400 75358 76881 56671 46392 56674 75388 67543 28738 71209 75398 77370 35778 35779 73333 48542 47668 20992 21129 45886 73706 73165 75416 78464 66156 68915 20763 19922 59289 65719 67825 45251 54992 55118 69585 19704 64791 38969 60568 64159 53968 49149 55845 35785 68918 65389 66831 26049 26054 81083 83606 65614 76503 60451 21313 70542 50086 26050 26038 56567 61302 41404 66600 53712 38663 68479 71353 82604 21432 48547 26043 71537 54523 41397 8678 45894 21445 66651 68989 43608 26042 72035 26553 47593 21250 66903 68050 56632 62505 48773 31304 69284 77507 53713 62338 46461 82761 26546 26543 86391 64392 26545 71445 64382 83850 26034 61494 48769 21441 48423 43831 43827 43830 81453 71860 67332 62649 26555 67665 63951 67292 56573 26044 75447 66206 63695 65601 64695 36181 66191 57024 61962 63269 68033 63697 42681 55939 79042 67517 65336 41913 68689 64385 52782 63170 52494 61934 82560 28042 80324 45910 75413 45911 66196 54499 70675 80367 80161 26040 64926 70315 48945 47985 49985 71213 71712 64217 81978 71446 44461 71450 80209 35791 70446 60693 53831 48544 60194 49992 61637 68488 75423 79771 78808 48005 13967 41223 81390 63555 71593 39603 66662 80288 46490 43834 55804 72285 72287 42737 28041 20890 57535 72362 53822 44409 75409 70962 74535 50076 63532 49710 42699 48007 62886 70963 74061 75417 47056 50074 51956 67666 74534 48636 48637 53833 53832 70512 68501 79654 49994 56604 65747 65127 54776 56937 49993 56602 56482 49997 63776 47656 35788 59468 41225 41226 68355 48486 70721 84490 39802 45893 48610 59548 43754 58344 45887 47594 45592 81350 28797 75465 75466 53277 27425 54780 87417 72681 82595 50022 54779 45097 86356 80562 50930 23635 53825 62280 60703 64623 74536 63314 77236 48006 75619 48008 66215 42975 69367 25523 69720 73884 59637 76585 66819 52263 45590 65134 73168 64214 63556 28802 75474 60708 74519 55209 51751 26032 73156 71442 73163 26055 72286 68047 48414 69354 53828 49663 70534 68500 65606 81391 47652 50699 50066 66263 74843 48101 64696 80326 80327 64446 71219 75472 72322 77774 53714 71647 64246 41231 73684 36449 65129 82233 41379 67191 50263 66237 83688 61395 43642 36472 50265 52851 68511 53830 70798 81274 39516 62507 60697 67553 54617 25522 50261 56483 55854 82429 86637 71690 41917 9039 84400 65951 50017 45909 37061 68348 24979 64428 62561 71910 75526 75517 87344 84779 61387 28812 56443 70595 72652 33497 90338 90055 54556 54674 72018 71464 74083 38952 86306 58340 64043 37236 77390 80356 74428 71555 54664 81212 82628 48190 74441 75442 73685 66872 50095 82623 50278 56618 9056
3691 39527 39525 31709 31710 32227 10400 39509 45349 25518 26207 39765 771 42195 39691 39709 37426 55796 73495 36284 40272 40152 36584 40211 39732 82181 29212 21491
3692 1550 24169 28145 33300 29702
3693 29946 39504 48090 32522 22552 33242 13050 11840 39558 45282 33433 79074 75221 42887 3205 39808 39448 7898 33466 51506 67579 33443 44562 39930 44324 29183 60448 40062 39997 11173 36890 50215 20326 39962 5208 39863 15103 37467 39953 37410 40269 40050 33719 25232 52909 40052 58388 5116 59378 43250 51612 7964 36895 71804 37421 40240 11188 44467 73185 50838 20615 40025 33507 90895 34725 21837 55005 37489 57594 40193 12947 91384 8272 29171
3694 25288 27969 46581 31077 25259
3695 46302 43790 13003 37434 52705
3696 38840 8269 26710 26476
3697 54438 7687 9018 37492 37423 35055 11847 42481 39071 40033 22749 51286 52090 47285 60521 33709 69103 60832 29202 38913 71285 40031 40243 39930 57989
3698 233 33823 12862 26749 26652
3699 66969 63711 51319 86009 21187 74908 34774
3700 194 22048 22026 8072 28572 55 47105
3701 1539 40762 1550 6549 33728 21471
3702 29809 41336 6540 11933 38236
3703 1253 50205 34518 46741 35543 40455 34175 50220 42636 34104 34174 46869 48853 10053 17510 34173 10046 30904 11096 67771 1342 62598 55990 77562 76129 72870 62588 488 30712 9289 12154 10045 37124 12560 33233 26408
3704 28969 35490 11456 9293 42513
3705 30791 5204 36237 62761 13525 32837 12839 60758 13625 26577 29622 1383 32217 114 10806 66 393 6806 38 118 6918 6961
3706 23800 37777 24516 1626 23418 1751 26677 6207
3707 22006 36167 12371 77353 1252 13019 33385 118 14353 9927 24680 6174 19544 7058 5600
3708 11818 11844 39893 39870 60426 52788 34393 47250
3709 50796 70239 58366 58368 56873 8877
3710 12202 4535 726 35235 82132 41031
3711 13914 14608 27985 29250 661 25611 16833 14151
3712 11575 10701 42385 10212 8269
3713 20098 30732 18606 35096 40357 3853 4717 4277 56944 44036 1 48425
3714 8460 29305 7855 33331 7386
3715 9865 3233 3207 33205 8190 3740 2969 20072
3716 4839 5801 6897 8221 23520 18984 4867 55620 11868 35142
3717 79377 74036 81449 58809 90223
3718 4396 924 18510 11074 35046 45330 45639 41617 27268 32678 1821 4228 8222 4349 47058 10551 19001 48058 31466 38772 5872 12715 21180 39291 51216 42579 44383 547
3719 21913 5941 12530 277 8960 5713 13003
3720 65178 53536 77988 39901 67798 36688 48445 51305 88593 62067 67278 29961 52463 77996 61145 48828 68620 102 670 7478 6918 62 429 36853
3721 12290 28423 28087 7170 7733 11355
3722 10156 32982 33265 27012 43296 43289 5564 5495
3723 13047 30960 200 45081 22022 10384 21962 7891 36237 23245
3724 23653 5546 2953 5837 5838 46168
3725 73585 11135 39168 22579 22580 80218 64789 85584 46495 67406 82363 64342 44433 63996 33086 56705 59586 54890 68971 64775 51307 42522 67363 49158 83512 40218 88079 52092 91273 85344 5669
3726 37174 26653 4782 12536
3727 18617 34793 19112 30881 29938
3728 19393 7593 20602 69334 68918 18358 27939 37757 27930
3729 23381 38521 10310 2870 31693 2946 46254 874 31810 28270
3730 37927 10902 39802 39745 39901 39971 51860 39928 55874 53873 64059 39973 40053 40157 28802 28815 40126 59210 57876
3731 16405 3492 23766 8183 17631 349 12921 17403 4241 5187 5258 33284 68267 4170 68854
3732 25041 1783 38487 46726 43493 5201 44584 24857 22647 3 31218 12338 8788 2521 34907 391 29559 61404 23809 1757 40010 1791 1251 6497 22023 21626 45081 24874 12965 12283 46888 596 29127 1319 24820 8023 5987 1330 2679 9404 6868 1751 1644 11982 28140
3733 7801 10975 11271 10978 12122 27732 11212 29701
3734 464 4336 5113 4494 29367 34803 28290 8869 28999
3735 41800 55800 68196 25222 21471 36359
3736 26964 2239 43076 57534 890 28862 38303 46296 38433 11588 70349 46052 8387 4197 2615 22705 22878
3737 8326 1446 4849 14505 10071 23123
3738 8222 7092 20987 3746 1747 35969
3739 32693 42950 3637 85872
3740 373 374 13 10886 12913
3741 11792 22287 43250 46271 33720
3742 40074 11162 62214 52640 44166 40235 40207 40280 78263 40228 35887 57976 57875 39234 40168 40190 70541 11180 2653
3743 52413 31473 60816 43955 39017
3744 10240 10431 25216 25213 188 7471 1334 215 10861 7 27445 374 33809 24211 6589 38963 27470 31605 22984 10436 27211
3745 48915 52314 55792 25502 12695 11157 39558 46224 30203 39519 35348 31305 52905 31569 39701 26441 56554 69002 33440 53735 64702 39581 11154 35897 80888 39811 51526 39856 39817 39858 39619 22657 39977 39989 83405 40091 29183 51286 10901 28841 40013 39999 57984 61633 50224 10913 89629 10920 57985 49798 50475 75975 71273 69099 81079 38573 5608 42753 30767
3746 17825 58014 39958 835 83791 12372 43583 9404 83792 41587 33721 6645 25385 24194 28880 49158 11946 68008 40335 51880 39741 74314 63217 35686 79474 81856 6646 9443 9468 9486 27211 71054 72141 65958 55433 49165 90517 91289 52624 58012 427 30316
3747 12827 26136 12256 33499 27815
3748 30200 47168 54649 25388 21352 35646 26586 36080
3749 8682 5629 5878 29795 395
3750 34396 7938 40255 48683 30218 46597 42485 1374 86732 38100 87642 72016 13075 39664
3751 34952 80864 64339 339 1665
3752 61357 86904 8193 24235 54513 38518 53355 24989 66754 24986 90330
3753 85383 52073 81554 90711 54616 85618
3754 22091 36349 10729 8973 35937 26978 24852
3755 30634 67468 63173 67724 37611 69832 44149 80707 68700 44170 65422 81210 75501 53233 78897 75856
3756 14719 22480 7633 393 78824
3757 74638 30965 761 58121 75341 23670
3758 24898 123 34388 7972
3759 1713 30722 42291 11 38535 2134 8839 3670 30379 1485 1104 12169 4956 1443 1665 1454 6448 654 5780 28492 11901 23741 1736 1651 1740 8897 1704 41992 527 1486 28272 1106 27207 241 23790 1382 26715 35665 25147 1715 1657 38019 7731 5201 1707 11877 975 8832
3760 70266 47197 11149 12603 40568 12313 31698 43853 83802 10568 74549 67912 6204 42553 42555 70141 35299 19060 32699 44260 40431
3761 34610 3129 39555 34812 51274 40136 51297 91557
3762 2239 1321 1312 6012 11669 23841 10697 2238 4622 1161 11676
3763 6890 20324 52013 29870 48961 57591 86843 53279
3764 6580 6582 19986 1603 2057 60294 30503 42655 6902 1563 8107 154 6637 30913 6519 21917 166 8066 14492 9628 6899 5233 1574 6708 5435 13843 3268 7457 192 962 5357 3076 956 37686 954 20300 23270 3629 23260
3765 2970 43525 25515 3397 40092 40184 49798 26691 3659
3766 59404 52782 43210 57474 61435 73792 61436 56452 50263 56437 57953 63168 77772 31660 12195 77773 59650 56440 74994 61439 54786 71645 73313 56454 50261 56502 78227 34476 67191 74599 56446 48881 81366 74996 75145 56481 73108 50269 59654 45909 67192 50266 56466 67193 74600 61643 76362 85008 41839 56478 68533 73318 56480 73323 82578 50271 54784 34477 54789 50281 88940 54788 56501 50287 56504 87510 87539
3767 8843 31124 1844 8000 5378
3768 43525 42479 55560 22778 43529 40166 36329 2662 89187 52680 24606 5082 42714 50641 70373
3769 56056 28479 56063 47462 33531 28438 26562 70659 60072 60076 47142 47247 89553 21681 67086
3770 23668 6245 67027 33793 967
3771 1916 1954 1606 2864 21510
3772 30002 8123 13706 975 11305 9658 28827
3773 1382 1624 12486 1438
3774 40935 26951 5211 50337 26861 42150 10268 12114
3775 19571 25521 19754 19508 7586 30975 932 39802
3776 35449 39834 40660 72036 29192 26472 29194 47635 47823 12060 32302 10150
3777 42423 1093 33250 65946 23611
3778 22299 44924 12369 36610 8112
3779 43002 780 12151 12250 3077
3780 7203 6860 33111 26473 1069 32187
3781 7633 60371 55049 42601 52736 53345 46841 42525 35185 84441
3782 11318 24352 605 1743
3783 26246 18585 29482 34839 34333 53554 34142 188
3784 1539 21471 27041 12493 24141 10409 23955 114 7415
3785 18751 3518 12669 8204 29531 47807 24776 16368 17493 12961 7413 39055 27714 17294 5058 27567 15605 16612 1119 17387 17188 7561 22170 27587 15893 10797 5583 3592 8970 10499 27910 37969 10724 26102 17408 14130 315 30512 5683 10501 51974 27578 17656 31109 16265 1129 5225 36271 12799 26018 8195 17742 36248 3741 27580 5109 10511 31672 16805 3726 9223 9903 642 6897 8209 3911 17948 8140 22228 4057 15030 11063 38080 11062 6478 51514 90 74264 44493 29464 17334 20336 6175 19068 43359 39517 39580 29960 46871 39956 39818 29967 4111 39833 40197 40215 39716 57284 59357 39952 40204 40267 39790 76415 6223 66937 40024 35888 40155 39778
3786 33366 33172 31515 32332
3787 29218 5077 35805 30215 15816 49886 3339 9854 48599 61430 46647 32528
3788 38328 51462 53978 7958 80140 91380 33509
3789 2834 33309 28098 3526 38585
3790 59468 31859 16330 69678 90339
3791 12606 175 7478 29405 5859 5149 28959 1450
3792 96 238 21819 8706 13261 88 12048 21878 7838 11026 7692 8126 11692 11673 164
3793 45429 54440 44154 72095
3794 64577 60424 65184 66885 56752 74904 81025 44101 53945 89447 27401 51245 39438 74124 57571 19975 67535 90800 66871
3795 24193 39880 32396 70107 56939 49912 10413
3796 53618 28218 11661 23976 10790 74 180
3797 28232 134 409 7207 24150 6927 39074 33116 26800 7410 8038 670 10504 43035 10812
3798 27721 5030 34266 35513 38132 6486
3799 8866 8256 646 279 8516 10778
3800 45084 31699 44973 26872 42317 12797 26875 23932 40950 39381 34760 8286 32086 22118 3522 53016 39643 39647 51271 41006 39629 38199 6243 11849 11732 40110 89563 48474 51300 48605 34393 63838 64601 59349 28538 82490 30206 66717 32227 57295 42260 46251 10793
3801 39418 43258 23104 23587 42794 29167 22926
3802 24884 5445 2426 1438 1710 1372 38993 23073
3803 61032 73654 51189 54361 49605 27398 36269
3804 25665 25694 25686 14446 25809 11268
3805 55910 10285 10189 73037 29847
3806 8130 3885 3525 47419 40305
3807 24195 11792 26025 36478 498 32640 41829 26137 9298 23908
3808 10446 27166 1370 21773 12352
3809 13526 7537 13537 13597 7572 9132 13660 27925 31096 7616 29642 13410 176 34066 9850
3810 17 721 395 62 76
3811 40871 694 72994 13048 54305 42914 32238
3812 35741 136 14872 34972 21979 7019 25527 8104 2825 14827 34942 43594 28015 34989 4994 12301 14006 12304 5586 8768 2223 5014 288 1003 21905 28926 15557 10214 6830 33622 40889 39241 23655 40740 40741 40742 14141 34940 21910 8023 5087 2954 5568 21804 21803 13263 13521 2024 2648 13885 14381 3231 34160 340 14686 14927
3813 3973 21659 29857 8261 7489 6590
3814 61597 8380 6905 8318 6927 427
3815 42330 52607 46418 44562 47744 19313 51995 84584 21998 33287 46417 52602 21204 39769 37347 5671 62410 73865 52923
3816 6169 39379 37512 41555
3817 11113 70493 33390 1774 44935 85505
3818 20965 21111 70961 48771 62886 84446
3819 36382 12612 27691 31743 34988 1796 23992 25357 23994
3820 6406 6405 27294 12813 5149 13003 29554 13056
3821 39779 39114 68725 40167 35451 91378 47250 10706 24434 10942
3822 28813 7550 9760 225 7540 21869 220
3823 81610 59944 83357 83380 71889 59853 87723 87350 89402 28294
3824 7429 14079 13918 14303 222 6742 13992 9988 35708 13803 14512
3825 28991 39347 21400 34736 23103 36983 39344 3059 6181 38183 39343 39230 39412 39413 39304 49783 32685 34758 34765 39419 39442 34514 36564 59881 50344 38633 39441 65698 26452 136 32682 36557 34611 39500 39630 26333 70422 670 49 1793
3826 21935 38922 44543 1539 29980 380 975
3827 22246 395 24778 5615 6906 32957
3828 1365 91 8073 395
3829 23215 20306 33448 31709 8212 47937 12848 30788 42605 48010 32526 46075 12849 11837 30213 24956 39778 46811 32529 37712 49041 31165 23496 72036 37675 20562 9653 37414 32391 32505 12914 47206 1024 42221 52637 35564 42795 76622 6634 31301 12258 32396 37433 30962 42118 38906 88123 5605 46846 23607 35574 32407 91285 74411 11847 91261
3830 4088 23038 9291 24581 7906 44586 10375 26436 23712 927 33542 26969 4255 11532 8423 57393 42113 45293 11342 34837 13004 42040 77817 10647 11614 12369 42015 10389 3887 1838 23092 5859 10384 26688 38072
3831 5815 21473 34415 27797 21945 5806 34786
3832 4826 35774 30780 51649
3833 7779 32941 34212 46516 1672
3834 59021 30822 28215 26831 38835
3835 12340 19446 32741 8322
3836 7891 29160 32837 35090 69116 5922
3837 12073 6079 40364 40535 2398 36400 10720 25474 40373 9207 11775 9250
3838 11635 38426 976 24260 33772 1372
3839 12926 13980 24344 34309 15419 9749 16404 8030 2379 15515 8140 14352 8924 10488 16437 473 23762 310 9807 669 9847 42667 474 16656 6919 245 2105 8192 9890 23828 1744 14071 14256 4990 15702 203
3840 32173 14879 5248 5044 44735 38945
3841 1043 650 26094 5102 12469
3842 33793 13075 34952 29169 29850 7882 63781 7478 684 1400
3843 32067 40136 59307 40134 39997 40123 40131 40171 40072 40076 40077 51288 40080 40135 40149 7943 40228 57972 57976 59657 7952 34393 7954 22886 41460 38327 59656 62544 53505 58873 38328 40254 42523 7958 52683 59661 70538 82181 61187 79360 38330 29214 83537
3844 11848 71804 53300 90196 32158 30500 23270
[truncated: 3,448,663 more chars]
