# Supplementary material for: Research on Recommendation Algorithm of Joint Light Graph Convolution Network and DropEdge
Source: Hindawi journal article supplement (doi:10.1155/2022/3843021), 2022-01-27
Supplement: f1 [file 3843021.f1.zip › 3843021.f1/amazon-train.txt]

0 0 1 2 3 4 5 6 7 8 9 10 11 12 13 14 15 16 17 18 19 20 21 22 23 24 25 26 27 28 29 30 31 32 33 34 35 36 37 38 39 40 41 42 43 44 45 46 47 48 49 50 51 52
1 53 54 49 55 56 57 58 59 60 61 62 63 64 65 66 67 68 69 70 71 72 73 74 26 75 76 77 78 79 80 81 82 83 14 84 85 86 87 88 89 90 91 92 93 94 95 96 97 98 29 99 100 101 102 103 104 105 106 107 108 109 110 111 112 113 114 115 116 117 118 119 120 121 122 123 124 125 52 126 127 128 129 130 131 132 133 134 135 22 136 137 138 139 140 141 142 143 144 145 146 147 148 149 150 151 152 153 154 155 156 157 158 159 160 161 162 163 164 165 166 44 167 168 169 170 171 172 173 174 175 176 177 178 179 180 181 182 183 184 185 186 187 188 189 190 191 192 193 194 195 196 197 198 199 200 201 202 203 204 205 206 207 208 209 210 211 212 213 214 215 216 217 218 219 220 221 222 223 224 225 226 227 228 229 230 23 231 232 233 234 235 236 237 238 239 240 241 242 243 244 245 246 247 248 249 250 251 252 253 254 255 256 257 258 259 260 261 262 263 264 265 266 267 268 269 270 271 272 273 274 275 276 277 278 279 280 281 282 283 284 285 286 287 288 289 2 290 291 292 293 294 295 296 297 298 299 300 301 302 303 304 305 306 307 308 309 310 311 312 313 314 315 316 317 318 319 320 321 322 323 324 325 326 327 328 329 330 331 332 333 334 335 336 337 338 339 340 341 342 343 344 345 346 347 348 349 350 351 352 353 354 355 356 357 358 359 360 361 362 363 364 365 366 367 368 369 370 371
2 372 373 114 13 374 375 376 377 378 379 380 381 382 383 384 385 386 387 388 389 390 391 392 393 143 394 395 15 396 397 398 399 400 401 402 403 404 405 406 407 408 409 410 411 412 413 414
3 415 416 49 417 32 418 23 419 27 211 420 421 422 24 115 423 424 425 165 426 427 14 428 194 429 430 431 432 433 434 435 436 437 438 439 440 441 442 443 444 445 446 447 448 449 450 451 452 453 454 455 222 330 456 457 458 459 460 13 461 364 462 463 464 465 466 467 468 469 470 471 472 473 474 475 476 477 478 479 480 481 482 483 484 485 486 487 488 489 490 491 225 492 493 494 495 496 497 498 499 500 501 502 503 504 505 506 507 508 509 510 511 512 513 514 515 516 517 518 519 520 521 522 523 524 525 526 527 528 529 530 531 532 533 534 535 536 537 538 539 540 541 542 543 544 545 546 547 548 549 550
4 551 552 553 554 555 556 557 558 559 560 561 562 563 564 565 566 419 567 568 569 570 571 572 573 574 575 576 577 578 579 580 581 582 583 584 585 586 587 431 588 589 590 591 592 593
5 594 595 54 596 367 597 598 599 600 601 602 278 603 604 605 606 607 608 609 610 611 612 103 121 613 614 615 616 617 618 619 620 621 168 622 623 624 625 626 627 628 629 310 630 631 632 355 633 391 634 635 636 637 638 1 639 640 641 642 643 644 645 646 647 648 649 650 651 652 653 654 655 656 657 658 659 660 661 662 180 663 664 665 666
6 390 667 378 668 114 379 669 670 671 672 673 674 675 676 677 393 678 679 680 681 682 683 136 684 387 685 686 176 687 688 689 690 691 692 118 693 694
7 695 696 397 697 698 699 700 701 702 703 704 705 706 707 708 709 710 711 712
8 713 3 714 715 716 717 718 719 720 721 722 723 724 725 726 79 727 728 729 730 731 732 733 734 735 736 737 738 739 740 741 742 743 744 745 746 747 748 749 750 751 752 753 754
9 755 325 756 757 758 759 760 761 762 763 764 765 766 767 768 769 770 771 772
10 773 774 775 776 38 714 8 777 778 779 780 781 782 359 783 462 463 784 466 785 786 787 788 789 790 791 792 793 794 479 795 796 797 798 799 800 688 801 802 803 804 805 806 807 808 809 810 811 812 813 814 815 816 817 818 819 820 821 822 823 824 825 826 827 828 829 830 831 832 833 834 835 836 837 838 839 840 841 842 843 844 845 846 847 848 849 850 851 852 853 854 855 856 857 858 859 518 860 861 862 863 864 865 866 867 868 869 870 871 872 873 874 875 757 876 877 878 879 880 881 882 883 884 885 886 887 888 889 890 891 892 893 894 895 896 897 898 899 900 901 902 903 904 905 906 907 908 909 910 911 912 913 914 915 916 917 918 919 920 921 922 923 924 925 926 927 928 929 930 931 932 933 934 935 936 937 938 939 940 941 942 943 944
11 945 946 947 948 949 950 951 952 953 954 955 956 957 958 959 404 960 961 962 963 964 965 966
12 967 968 969 970 971 972 684 973 974 975 976 376 977 978 979 980 981 982 983 984
13 10 985 958 959 986 956 121 987 988 989 990 991 992 993 994 995 996 997 998 999 1000 1001 1002 1003
14 1004 1005 1006 603 1007 1008 1009 1010 390 1011 1012 1013 1014 1015 1016 1017 1018 1019 1020 1021 1022 1023 1024 1025 1026 1027 1028 1029 1030 1031 1032 1033 1034 1035 1036 1037 1038 1039 1040 1041 1042 1043 1044 1045 1046 1047 1048 1049 1050 1051 1052 1053 1054
15 1055 1056 125 1057 1058 1059 1060 1061 1062 1063 1064 1065 1066 1067 1068 1069 629 1070 1071 1072 1073 1074 1035 1075 1076 1077 1078 1079 1080 1081 1082 1083 1042 1084 1085 1086 1087 1088 1089 1090 1091 167 1092 1093 1094 1095 1096 1097 1098 1099 1100 1101 1102 1103 520 220 1104 1105 315 1106 1107 1108 1109 1110 1111 1112 780 1113 1114 1115 1116 1117 1118 1119 1120 1121 1017 1122 1123 1124 1125 1126 1127 1128 1129 1130 1131 1132 1133 1134 1135 1136 1137 1138 1139 1140 1141 1142 1143 1144 1145 1146 1147 1148 691 1149 1150 1151 1152 319 787 1153 1154 1155 1156 1157 1158 1159 1160 103 1161 1162 1163 1164 1165 1166 1167 1168 1169 1170 1171 1172 1173 1174 1175 1176 1177 1178 1179 1180 1181 1182 1183 1184 1185 1186 1187 1188 1189 1190 1191 1192 1193 1194 1195 1196 1197 1198 1199 664 1200 1201 606 1202 1203 1204 1205 1206 1207 1208 1209 1210 1211 1212 1213 1214 1215 1216 1217 1218 1219 1220 1221 1222 1223 1224 1225 1226 1227 1228 1229 1230 1231 1232 1233 1234 1235 1236 1237 1238 1239 1240 1241 1242 1243 1244 1245 1246 1247 1248 1008 1249 1250 1046 1051 1251 1252 1253 1254 1255 1256 1257 1258 1259 1260 1261 1262 1263 1264 1265 1266 1267 1268 1269 1270 1271 1272 1273 1274 1275 1276 1277 1278 1279 1280 1281 1282 1283 1284 1285 1286 1287 1288 1289 1290 1291 1292 1293 1294 1295 1296 1297 1298 1299 1300 1301 1302 1303 1304 1305 1306 1307 1308 1309 1310 1311 1312 1313 1314 1315 1316 1317 1318 1319 1320 1321 1322 1323 1324 1325 1326 1327 1328 1329 1330 1331 1332 1333 143 1334 1335 1336 1337 1338 1339 1340 1341 634 1342 1343
16 1344 1345 1346 1347 1348 1349 1350 1351 656 1352 1353 1354 1355 1356 1357 1358 180 651 1359 1360 1361 1362 594 1363 1364 11 975 1365 1366 1367 401 1368 1369 1370 1371 1372 1373 145 1374 1375 1376 1377 1378 1379 1380 1381 1065 967 1382 1063 1383 1384 78 151
17 1385 1386 1387 1388 1389 187 1390 1391 1392 1393 1394 1395 1396 1397 1398 1399 1400 1401
18 1402 1 1403 1404 1405 1406 1407 1009 1408 1409 1410 1020 1196 1411 775 1412 1413 1414 1415 1416 1417 1418 1419 1420 1421 1422 662 630 1423 1424 1425 1426 1427 40 570 1428 1429 1430 1431 1432 1433 1434 1435 584 1436 1437 1149
19 1438 1439 1440 187 1441 1442 691 1443 1444 1445 1446 1447 1448 177 1449 1450 1451 1452 1453 1454 1455 646 1366 1195 1456 1457 1458 1459 1460 1461 1083 1462 1463 1464 1465 1466 1467 1468 1469 1470 390 1471 1472 1473 1474 1475 1476 1477 1015 1478 1479 1382 1193 1480 1481 1482 1483 1484 1485 1486
20 1487 1488 1489 1490 1491 1492 1493 1494 1495 1496 1497 1498 1499 1500 398 1501 1502 1503 1504 1505 1506 1507 1508 1509 1510 1511 1512 1513 1514 1515 1516 1517 1518 1519 1520 1521 1522 1523 1524 1525 1526 1527 1528 1529 1530 1531
21 1532 1533 1534 1535 1536 1537 1538 1539 1540 1541 1542 1543 395 1544 1545 1546 1547 1548 1549 1550 1551 1552 1553 1554 1555 1556 1557 1558 1559 1560 1561 1562 1563 1564 1565 1566 1567 1568 1569 1570 1571 1572 1573 1574 1575 1576 1577 1578 1579 1580 1581 1582 1583 1584 1585 1586 1587 1588 1589 1590 1591 1592 1593 1594 1595 1596 1597 1598 1599 1600 1601 1602 1603 1604 1605 1606 1607 1608 1609 1610 1611 1612 1613 1614 1615 1616 1617
22 1618 1619 1620 1621 1622 187 1623 1624 1041 1625 1626 980 1627 1628 1629 1630 1631 1632 1133 1633 1634 1635 1636 1637 1638 1639 1640 1641 1642 1643 1644 693 1645 1646 1647 1648 1649 1650 1651 1652 1653 1654 1655 1211 1656 1657 1658 1659 1660 1661 1662 1663 1664 1361 1382 1665 1666 1667 1668 1669 1670 1671 669 1672 1014 1673 1674 1675 1676 1677 1465 1678 1679 1680 1681 1682 1683 1684 1685 1686 1687 1688 1689 1690 1440 1691 1692 1693 1694 1695 1696 1697 1698 1699 1700 1368 1701 1702 1703 1704 1705 1706 1707 1708 1709 1457 1332 1710 1711 1712 1713 1714 1715 1716 1717 1718 1719 1720 1126 1721 1722 1723 1475 605 1724 1725 1726 1727 1728 1729 1730 1731 1732 1733 1734 1735 177 1736 1737 1738 1739 1740 1441 1741 1742 1743 1744 1745 1746 1747 1748 1749 1750 1751 1752 1753 1754 678 1755 1756 1757 1758 1759 1760 1761 1444 1762 1763 1764 1765 1766 1767 1768 1769 1770 1771 1772 1773 1774 1775 1776 1777 1778 1779 1780 1781 1782 1783 1784 1785 1786 1787 1198 608 1788 1459 1789 1790 1309 1791 1792
23 1793 429 1200 40 1794 1427 1795 1796 1797 820 430 1798 1799 1800 1801 1802 1803 1804 1805 1806 1807 1808 1809 1810 1811 1812 1813 1814 1815 1011 1816 1817 1818 1819 659 1820 1821 1822 1507 1823 895 1824 1825 1826 1827 1828 1829 1830 1831 1832 890 1833 1834 835 1049 1835 1836 1837 1838 1189 1839 893 1840 1841 1842 1843 1844 1845 1846 1847 1848 1849 1850 480 1851 1852 1853 1854 1855 1856 1857 1858 894 1859 1860 1861 1862 1863 1864 1865 431 1866 1867
24 1269 1868 1869 1870 1871 1872 1873 1874 1875 1876 1877 1878 1879 1880 1881 1564 1882 1883 1884 605 1164 1885 1886 1887 1888 1889 1709 1890 1891 1892 1893 1894 1895 1896 1897 1391 1898 1899 1900 1901 1902 1903 1904 1905 1906 1907 1908 1909 1910 1911 1912 1913 1914 1915 1916 1917 1918 1919 1920 1921 1922 1923 1924 1925 1926 1927 1928 1929 986 1930 1931 1932 1933 1934 1935 1936 1937 1938 85 1939 1940 1941 1942 1943 1944 1945 1946 725 1947 1948 1949 1950 1951 1952 1953 1954 1955 1956 716 1957 1958 1959 1960 1961 1962 1963 1964 1965 1966 1967 1968 1969 1970 1971 1972 1973 1974 1481 1975 1976 1977 1978 1979 1980 1981 1982 232 1983 1984 1985 1986 1987 1988 1989 1990 1991 1992 1993 1994 1995 1996 1997 1998 1999 2000 2001 2002 2003 774 2004 2005 2006 2007 2008 2009 565 2010 2011 2012 2013 2014 2015 2016 2017 2018 2019 2020 2021 2022 2023 2024 2025 2026 2027 2028 2029 2030 2031 2032 2033 2034 2035 2036 2037 2038 2039 2040 2041 2042 2043 2044 2045 2046 2047 2048 2049 1742 2050 2051 2052 2053 2054 2055 2056 2057 2058 2059 557 2060 2061 2062 2063 2064 2065 2066 2067 2068 2069 1486 2070 959 2071 2072 2073 2074 2075 2076 2077 2078 2079 2080 2081 2082 2083 2084 2085 2086 2087 2088 2089 2090 2091 2092 1622 2093 2094 2095 2096 2097 2098 2099 1426 2100 2101 2102 2103 2104 2105 2106 2107 2108 2109 2110 2111 2112 2113 2114 2115 2116 2117 2118 2119 2120 2121 2122 2123 2124 2125 2126 2127 2128 2129 2130 2131 2132 2133 2134 1672 2135 2136 2137 2138 2139 2140 2141 2142 2143 2144 2145 451 2146 387 2147 2148 2149 2150 1412 2151 2152 1723 2153 2154 2155 2156 2157 2158 2159 2160 2161 2162 2163 2164 2165 1364 2166 2167 2168 2169 2170 1812 2171 2172 2173 2174 2175 2176 2177 2178 2179 2180 2181 2182 2183 2184 2185 2186 2187 2188 2189 2190 2191 2192 2193 2194 2195 2196 1507 2197 2198 2199 286 2200 2201 2202 2203 2204 2205 2206 2207 2208 2209 2210 2211 2212 2213 2214 2215 2216 2217 2218 2219 2220 2221 2222 2223 2224 2225 2226 2227 2228 2229 2230 2231 2232 2233 2234 2235 2236 2237 2238 2239 1430 2240 2241 2242 2243 1031 2244 2245 2246 2247 2248 2249 2250 2251 585 2252 2253 2254 2255 2256 2257 2258 209 2259 996 2260 2261 2262 1424 2263 2264 2265 2266 2267 2268 2269 2270 2271 2272 2273 2274 2275 2276 2277 2278 2279 2280 2281 2282 2283 2284 2285 2286 2287 2288 2289 2290 2291 2292 2293 2294 2295 2296 2297 2298 2299 2300 2301 2302 2303 2304 2305 2306 2307 2308 2309 2310 2311 2312 2313 2314 2315 2316 2317 2318 2319 2320 2321 2322 2323 2324 2325 2326 2327 2328 2329 2330 2331 2332 2333 2334 2335 2336 2337 2338 2339 2340 2341 2342 2343 2344 2345 2346 2347 2348 2349 2350 2351 2352 2353 2354 2355 2356 2357 2358 2359 2360 2361 2362 2363 2364 2365 2366 2367 2368 2369 2370 2371 2372 2373 2374 2375 2376 2377 2378 2379 2380 2381 2382 2383 2384 2385 2386 2387 2388 2389 2390 2391 2392 2393 2394 2395 2396 2397 2398 2399 2400 2401 2402 2403 2404 2405 1688 2406 2407 2408 2409 2410 2411 2412 2413 2414 2415 2416 2417 2418 2419 2420 2421 2422 2423 2424 2425 2426 2427 2428 2429 2430 1018 2431 2432 2433 2434 2435 2436 2437 2438 2439 2440 2441 2442 2443 2444 2445 2446 2447 2448 2449 2450 2451 2452 2453 2454 2455 2456 2457 2458 2459 2460 2461 2462 2463 2464 2465 2466 2467 2468 2469 2470 2471 2472 2473 2474 2475 2476 2477 2478 2479 2480 2481 2482 2483 2484 2485 2486 2487 2488 2489 2490 2491 2492 2493 2494 2495 2496 2497 2498 2499 2500 2501 2502 2503 2504 2505 2506 2507 2508 2509 2510 2511 2512 2513 2514 2515 2516 2517 2518 2519 2520 999 1074 2521 2522 1217 2523 2524 2525 2526 2527 2528 2529 2530 2531 2532 2533 2534 2535 2536 2537 2538 2539 2540 2541 2542 2543 2544 2545 2546 2547 2548 2549 2550 2551 2552 2553 2554 2555 2556 2557 2558 2559 2560 2561 2562 2563 2564 2565 2566 2567 2568 2569 2570 2571 2572 2573 2574 2575 2576 2577 2578 2579 444 2580 2581 2582 2583 2584 2585 2586 2587 2588 2589 2590 2591 2592 2593 2594 2595 2596 2597 2598 2599 2600 2601 2602 2603 2604 2605 2606 2607 2608 2609 593 2610 2611 2612 2613 2614 2615 2616 2617 2618 2619 2620 2621 2622 2623 2624 2625 2626 2627 2628 2629 2630 2631 2632 2633 2634 2635 2636 2637 2638 2639 2640 2641 2642 2643 2644 2645 2646 2647 2648 2649 2650 2651 2652 2653 2654 2655 2656 2657 2658 2659 1129 2660 2661 2662 2663 2664 2665 2666 2667 2668 2669 2670 2671 2672 2673 2674 2675 2676 2677 2678 2679 2680 2681 2682 2683 2684 2685 2686 2687 2688 2689 2690 2691 2692 2693 2694 2695 2696 2697 2698 2699 2700 2701 2702 2703 2704 2705 2706 2707 2708 2709 2710 2711 2712 2713 2714 2715 2716 2717 2718 2719 2720 2721 2722 2723 2724 1035 2725 2726 954 2727 2728 2729 2730 2731 2732 2733 2734 2735 2736 2737 2738 2739 2740 2741 2742 2743 2744 2745 2746 2747 2748 2749 2750 2751 2752 2753 2754 2755 2756 2757 2758 2759 2760 2761 2762 2763 2764 2765 2766 2767 2768 1816 2769 2770 2771 2772 2773 2774 1808 2775 2776 2777 2778 2779 2780 2781 2782 2783 2784 2785 2786 2787 2788 2789 2790 2791 2792 2793 2794 2795 2796 2797 2798 2799 2800 2801 2802 2803 2804 2805 2806 2807 2808 2809 2810 2811 690 2812 2813 2814 2815 2816 2817 2818 2819 2820 2821 2822 2823 2824 2825 2826 688 2827 2828 2829 2830 2831 2832 2833 2834 2835 2836 2837 2838 2839 2840 2841 2842 2843 2844 2845 2846 2847 2848 2849 2850 2851 2852 2853 2854 2855 2856 2857 2858 2859 2860 2861 2862 2863 2864 2865 2866 2867 2868 2869 2870 2871 2872 2873 2874 2875 2876 2877 2878 350 2879 2880 2881 2882 2883 2884 2885 2886 2887 2888 2889 2890 2891 2892 2893 2894 2895 2896 2897 2898 2899 2900 2901 2902 2903 2904 2905 2906 2907 2908 2909 2910 2911 2912 2913 2914 2915 2916 2917 2918 2919 2920 2921 2922 2923 2924 2925 2926 2927 2928 2929 2930 2931 2932 782 2933 2934 2935 2936 2937 2938 2939 2940 2941 2942 2943 2944 2945 2946 2947 2948 2949 2950 2951 2952 2953 2954 2955 2956 2957 2958 2959 2960 2961 2962 2963 2964 2965 2966 2967 2968 2969 2970 2971 2972 2973 2974 2975 2976 2977 2978 2979 2980 2981 2982 2983 2984 2985 2986 2987 2988 2989 2990 2991 2992 2993 2994 2995 2996 2997 2998 2999 3000 3001 3002 3003 3004 3005 3006 3007 3008 3009 3010 3011 3012 3013 3014 3015 3016 3017 3018 3019 3020 3021 3022 3023 3024 3025 3026 3027 3028 3029 3030 3031 3032 136 3033 3034 3035 3036 3037 3038 3039 3040 3041 3042 3043 3044 3045 3046 3047 3048 3049 3050 3051 3052 13 3053 3054 3055 3056 3057 3058 3059 3060 3061 3062 3063 3064 3065 3066 3067 3068 3069 3070 462 3071 3072 3073 3074 3075 3076 3077 3078 3079 3080 3081 3082 3083 3084 3085 3086 292 3087 3088 3089 3090 3091 3092 3093 3094 3095 3096 3097 3098 3099 3100 3101 3102 3103 3104 3105 3106 3107 783 3108 1821 3109 3110 3111 3112 255 3113 3114 3115 3116 3117 3118 3119 3120 3121 3122 3123 3124 1818 3125 3126 3127 3128 3129 3130 3131 3132 1632 3133 3134 3135 3136 3137 3138 3139 3140 3141 3142 3143 3144 3145 3146 3147 3148 3149 3150 1192 3151 3152 3153 3154 3155 3156 3157 3158 3159 3160 3161 3162 3163 3164 3165 3166 3167 3168 3169 3170 3171 3172 3173 3174 3175 3176 463 3177 3178 3179 3180 3181 3182 3183 3184 3185 3186 3187 3188 3189 3190 3191 3192 3193 3194 3195 3196 3197 3198 3199 3200 3201 3202 3203 3204 3205 3206 3207 3208 3209 3210 3211 3212 3213 3214 3215 3216 3217 3218 1443 3219 3220 3221 3222 3223 3224 3225 3226 3227 3228 3229 3230 3231 3232 3233 3234 3235 3236 3237 3238 691 228 3239 3240 3241 3242 3243 3244 3245 3246 3247 3248 3249 3250 3251 3252 3253 3254 3255 3256 3257 3258 3259 3260 3261 3262 3263 3264 786 3265 3266 3267 3268 3269 3270 3271 3272 3273 3274 3275 3276 3277 3278 3279 3280 3281 3282 3283 3284 3285 3286 3287 3288 3289 3290 3291 3292 3293 3294 3295 3296 3297 790 797 3298 3299 3300 3301 3302 3303 3304 3305 3306 3307 3308 3309 3310 3311 3312 3313 3314 3315 3316 3317 3318 3319 3320 3321 92 3322 3323 3324 3325 3326 3327 3328 3329 3330 3331 3332 3333 3334 3335 3336 3337 3338 3339 3340 3341 1174 3342 3343 3344 3345 3346 3347 3348 3349 3350 3351 3352 3353 3354 804 3355 3356 3357 3358 3359 3360 3361 3362 3363 3364 3365 3366 3367 3368 3369 3370 3371 3372 3373 3374 3375 3376 3377 3378 3379 3380 3381 3382 3383 3384 3385 3386 3387 3388 3389 3390 3391 3392 3393 3394 3395 3396 3397 3398 3399 3400 3401 3402 3403 3404 3405 3406 3407 3408 3409 3410 3411 3412 3413 3414 3415 3416 3417 3418 3419 3420 963 3421 3422 3423 3424 3425 3426 3427 3428 3429 3430 3431 3432 3433 3434 3435 3436 3437 3438 3439 3440 3441 3442 3443 3444 3445 3446 757 3447 3448 680 3449 3450 3451 3452 3453 3454 3455 3456 1203 3457 3458 3459 3460 3461 3462 3463 3464 3465 3466 3467 3468 3469 3470 3471 3472 3473 3474 3475 3476 3477 3478 3479 3480 3481 3482 3483 3484 3485 3486 3487 3488 3489 3490 3491 3492 3493 3494 1584 3495 3496 3497 3498 3499 3500 3501 3502 3503 3504 3505 3506 3507 3508 3509 3510 3511 3512 3513 3514 3515 3516 3517 3518 1374 3519 3520 3521 3522 3523 3524 3525 3526 3527 3528 3529 3530 3531 3532 3533 805 3534 3535 851 3536 3537 3538 3539 3540 3541 3542 3543 3544 3545 3546 3547 3548 3549 3550 3551 3552 3553 3554 3555 3556 3557 3558 3559 3560 3561 826 3562 3563 3564 3565 3566 3567 3568 3569 3570 3571 3572 3573 3574 3575 3576 3577 3578 3579 3580 3581 3582 3583 3584 3585 3586 3587 3588 3589 3590 3591 3592 3593 3594 3595 3596 3597 3598 3599 3600 3601 3602 3603 3604 3605 3606 3607 3608 3609 3610 3611 3612 3613 3614 3615 3616 3617 3618 3619 3620 3621 3622 3623 1189 3624 3625 1646 3626 3627 3628 3629 3630 3631 3632 3633 3634 3635 3636 3637 3638 3639 3640 3641 3642 3643 3644 3645 3646 821 3647 3648 3649 3650 3651 3652 3653 3654 3655 3656 3657 3658 3659 3660 3661 3662 3663 3664 3665 3666 3667 3668 3669 3670 3671 3672 3673 3674 3675 3676 3677 3678 3679 3680 3681 3682 3683 3684 3685 3686 3687 3688 3689 3690 3691 3692 3693 3694 3695 3696 3697 3698 3699 3700 3701 3702 3703 3704 3705 3706 3707 799 3708 3709 3710 3711 3712 3713 3714 3715 3716 3717 3718 3719 3720 3721 3722 3723 3724 3725 3726 3727 3728 3729 3730 3731 3732 3733 3734 3735 842 3736 3737 3738 3739 3740 3741 3742 3743 3744 3745 3746 3747 3748 3749 3750 3751 3752 3753 3754 3755 3756 3757 3758 3759 3760 3761 3762 3763 3764 3765 3766 3767 815 3768 3769 3770 3771 3772 3773 3774 3775 3776 3777 3778 3779 3780 3781 3782 3783 3784 3785 3786 3787 3788 3789 3790 3791 3792 3793 3794 3795 3796 3797 3798 3799 3800 3801 3802 3803 3804 3805 3806 3807 3808 3809 3810 3811 3812 3813 3814 3815 3816 203 3817 3818 3819 3820 3821 3822 3823 3824 3825 3826 3827 3828 3829 3830 3831 3832 3833 3834 3835 3836 814 3837 3838 3839 3840 3841 3842 3843 3844 3845 3846 3847 3848 3849 3850 3851 3852 3853 3854 3855 3856 3857 3858 3859 3860 3861 3862 3863 3864 3865 3866 3867 3868 3869 3870 3871 3872 3873 3874 837 3875 3876 3877 3878 3879 3880 3881 3882 3883 3884 3885 3886 3887 3888 3889 3890 3891 1845 3892 3893 3894 3895 3896 3897 3898 3899 3900 849 3901 3902 3903 3904 3905 3906 3907 3908 3909 3910 3911 3912 3913 3914 3915 3916 3917 3918 3919 836 3920 3921 3922 3923 3924 3925 3926 3927 3928 3929 3930 3931 3932 3933 3934 3935 3936 3937 3938 3939 3940 3941 3942 3943 3944 3945 3946 3947 3948 3949 3950 3951 3952 3953 3954 3955 3956 3957 3958 3959 3960 3961 3962 3963 3964 3965 3966 3967 3968 3969 3970 3971 3972 3973 3974 3975 3976 3977 3978 3979 3980 3981 3982 3983 3984 3985 3986 3987 3988 3989 3990 3991 3992 3993 3994 3995 3996 3997 3998 3999 4000 4001 4002 4003 4004 4005 4006 4007 4008 4009 4010 4011 4012 4013 4014 4015 4016 4017 4018 4019 4020 4021 4022 4023 4024 4025 4026 4027 4028 4029 4030 4031 4032 4033 4034 4035 4036 4037 4038 4039 4040 4041 4042 4043 4044 4045 4046 4047 4048 4049 4050 4051 4052 4053 4054 4055 4056 4057 4058 4059 4060 4061 4062 860 4063 4064 4065 4066 4067 4068 4069 4070 4071 4072 4073 4074 4075 4076 4077 4078 4079 4080 4081 4082 839 4083 4084 4085 4086 4087 4088 4089 4090 4091 861 4092 4093 4094 4095 4096 4097 4098 4099 4100 4101 4102 753 4103 4104 4105 4106 4107 4108 4109 4110 4111 4112 4113 4114 4115 4116 4117 4118 4119 4120 4121 4122 4123 4124 4125 4126 4127 4128 4129 4130 4131 4132 4133 4134 4135 4136 4137 4138 4139 4140 4141 4142 4143 4144 4145 4146 4147 4148 4149 4150 4151 4152 4153 4154 838 4155 4156 4157 4158 4159 4160 4161 4162 4163 4164 4165 4166 4167 4168 4169 4170 4171 4172 4173 4174 4175 4176 4177 4178 4179 4180 4181 4182 4183 4184 4185 4186 4187 4188 4189 4190 4191 4192 4193 4194 4195 4196 4197 4198 4199 4200 4201 4202 4203 4204 4205 4206 4207 4208 4209 4210 4211 4212 4213 4214 4215 4216 4217 4218 4219 4220 4221 4222 4223 867 4224 4225 4226 4227 4228 4229 4230 4231 4232 4233 4234 4235 4236 4237 4238 4239 4240 4241 4242 4243 4244 4245 4246 4247 4248 4249 4250 4251 4252 4253 4254 4255 4256 4257 4258 4259 4260 4261 4262 4263 4264 4265 4266 4267 4268 4269 4270 4271 4272 4273 4274 4275 4276 4277 1221 4278 4279 4280 4281 4282 4283 4284 4285 4286 4287 4288 4289 4290 4291 4292 4293 4294 4295 4296 4297 4298 4299 4300 4301 4302 4303 4304 4305 4306 4307 4308 4309 4310 4311 4312 4313 4314 4315 4316 4317 4318 4319 4320 4321 4322 4323 4324 4325 4326 4327 4328 4329 4330 4331 4332 4333 4334 4335 4336 4337 4338 4339 4340 4341 4342 4343 4344 4345 4346 4347 4348 4349 4350 4351 857 4352 4353 4354 4355 4356 4357 4358 4359 4360 4361 4362 4363 4364 4365 4366 4367 4368 1240 4369 4370 4371 4372 4373 4374 4375 4376 4377 4378 863 4379 4380 4381 4382 4383 4384 4385 4386 4387 4388 4389 4390 4391 4392 4393 4394 4395 4396 4397 4398 4399 4400 4401 4402 4403 4404 4405 4406 4407 4408 4409 4410 4411 4412 4413 4414 4415 4416 4417 4418 530 4419 4420 4421 4422 4423 4424 4425 4426 4427 4428 4429 4430 4431 4432 4433 4434 4435 4436 4437 4438 4439 4440 4441 4442 400 4443 4444 4445 4446 4447 4448 4449 4450 4451 4452 4453 4454 4455 4456 4457 4458 4459 4460 4461 4462 4463 4464 4465 4466 4467 4468 4469 4470 4471 4472 4473 4474 4475 4476 4477 4478 4479 4480 4481 4482 4483 4484 4485 4486 4487 4488 4489 4490 4491 4492 4493 4494 4495 4496 4497 4498 4499 4500 4501 4502 4503 4504 4505 4506 4507 4508 4509 4510 4511 4512 4513 4514 4515 4516 4517 864 4518 4519 4520 4521 4522 4523 4524 4525 4526 4527 4528 4529 4530 4531 4532 4533 4534 4535 4536 4537 4538 4539 4540 4541 4542 4543 4544 4545 4546 4547
25 4548 4549 4550 716 1143 4551 4552 4553 4554 4555 4556 4557 725 4558 733 4559 4560 4561 553 1036 1012 1914 4562 614 2005 4563 4564 1995 4565 4566 4567 1071 4568 4569 4570 4571 4572 4573 4574 4575 4576 4577 4578 4579 575 4580 4581 4582 4583 4584 4585 4586 4587 4588 580 4589 2364 4590 4591 1723 2202 4592 4593 2185 4594 4595 4596 4597 4598 4599 4600 4601 1420 4602 4603 4604 4605 4606 630 4607 4608 4609 1429 586 4610 2318 4611 4612 4613 4614 2187 4615 4616 2276 1430 2265 4617 4618 4619 4620 4621 4622 4623 4624 4625 4626 4627 2319 2337 4628 4629 4630 4631 2399 592 4632 2793 4633 4634 4635 4636 2401 2619 4637 2713 4638 4639 325 4640 4641 4642 4643 4644 4645 4646 4647 4648 4649 2597 2605 2599 4650 3135 2613 4651 2612 4652 2801 2733 2572 2756 4653 2758 4654 4655 4656 2681 3336 4657 2802 4658 4659 4660 4661 4662 2838 4663 4664 4665 4666 4667 4668 4669 4670 4671 2998 4672 4673 4674 3028 4675 4676 4677 4678 3081 3001 4679 4680 4681 4682 4683 4684 3220 4685 4686 4687 4688 4689 4690 4691 4692 4693 4694 3391 801 4695 3853 4696 4697 4698 4699 4700 4701 4702 4703 4704 3427 4705 4706 3519 1183 4707 4708 4709 3724 4710 4711 4712 3667 4713 3805 4714 3726 3893 4715 3761 4716 3863 4717 4718 3991 4719 4720 3969 4060 4721 4722 4723 4724 4725 1229 4726 4727 4728 4729 4421 4730 4731 4732 4319 4733 4734 4537 4735 4736 4737 4738 4739 4740 4741 4742 4743 4744 4745 4746 4747 4748 4749 1258 4750 4751 4752 4753 4754 4755 4756 1296 4757 4758 4759 4760 4761 4762 4763 4764 4765 4766 4767 4768 4769 4770 4771 899 4772
26 4773 4774 4775 4776 4777 985 40 4778 4779 4780 1539 4781 673 1600 4782 4783 4784 1799 4785 4786 4787
27 4788 4789 4790 1532 1387 4791 4792 4793 4794 4795 4796 4797 4798 4799 4800 4801 4802 4803 4804 4805 4806 4807 4808 4809 4810 4811 4812 4813 4814 4815 4816 4817 4818 4819 4820 4821 2427 4822 4823 4824 2688 2734 4825 4826 4827 4828 4829 4830 4831 673 3061 4832 4833 4834 1811 4835 4836 1437 4837 4838 4775 1864 4839 13 4840 4841 4842 3287 4843 4844 4845 2232 4846 4847 4848 4849 3437 3526 4850 4851 4852 4853 4854 4855 4856 4857 4858 4859 4860 4861 4862 4609 4863 4864 4865 4866 4867 4868 4869 4870 4871 4872 4873 4874 4875 4876 4877 4878 4879 4880
28 4881 4882 4883 4884 4885 4886 4887 4888 662 4889 4890 4891 4892 4893 4894 4895 4896 40 4897 4898 4899 4900 4901 2191 4902 4903 1557 4904 4905 4906 121 4907 1427 4908 4909 4910 4911 4912 4913 4914 4915 4916 1974 4917 2016 2150 4918 4919 4920 4921 4922 4923 4924 173 4925 4926 4927 4928 1573 4929 4930 4931 4932 4933 4934 4935 4936 90 1602 4937 2050 4938 4939 4940 4941 4942 4943 4944 4945 1423 4946 4947 4948 4949 4950 2090 4951 4952 4953 4954 4955 4956 4957 4958 4959 4960 4961 4962 4963 163 4964 4965 4966 4967 432 4968 4969 168 4970 4971 223 4972 4973 4974 164 4975 4976 4977 4978 4979 4980 4981 4982 4983 4984 4985 4986 4987 4988 4989 4990 4991 4992 1430 4993 4994 4995 4996 4997 2207 1017 4998 4999 5000 5001 5002 5003 5004 5005 5006 5007 5008 254 5009 5010 5011 5012 5013 5014 5015 5016 5017 5018 5019 5020 2305 5021 5022 5023 2122 5024 5025 5026 377 5027 5028 5029 5030 5031 5032 5033 5034 5035 5036 1370 5037 5038 5039 5040 310 5041 5042 409 4647 5043 5044 444 5045 5046 5047 5048 5049 5050 5051 5052 5053 5054 5055 5056 5057 5058 5059 5060 5061 5062 5063 2729 5064 5065 2726 2761 5066 1003 5067 2842 5068 2627 5069 5070 5071 1024 5072 2796 5073 5074 5075 5076 5077 2879 5078 5079 5080 5081 5082 5083 1707 5084 5085 5086 5087 2952 5088 355 5089 5090 5091 5092 5093 5094 363 5095 1140 5096 5097 5098 136 220 5099 5100 5101 5102 5103 5104 5105 5106 5107 5108 5109 5110 3769 5111 5112 5113 5114 5115 2441 5116 5117 5118 5119 3233 5120 5121 3083 5122 5123 5124 5125 5126 5127 5128 5129 5130 3131 5131 5132 5133 5134 5135 5136 5137 3280 5138 1814 5139 5140 5141 5142 5143 5144 5145 5146 5147 5148 5149 3421 5150 5151 5152 2426 5153 5154 5155 5156 5157 5158 5159 5160 835 5161 5162 5163 5164 3574 5165 5166 890 1103 5167 3579 5168 5169 3785 5170 5171 893 3808 3688 5172 5173 5174 5175 5176 5177 5178 5179 3741 4718 5180 5181 5182 5183 5184 5185 3864 5186 5187 5188 5189 5190 5191 5192 4598 5193 5194 5195 5196 5197 3953 5198 5199 5200 5201 3006 5202 5203 5204 1095 5205 5206 1734 1709 5207 1438 1104 5208 5209 5210 5211 1229 5212 5213 5214 5215 5216 5217 5218 681 5219 5220 5221 5222 5223 5224 3513 5225 5226 5227 1642 5228 5229 5230 5231 5232 5233 5234 5235 398 5236 5237 5238 5239 894 5240 5241 5242 5243 5244 4451 5245 5246 5247 5248 5249 5250 5251 4336 5252 5253 5254 5255 5256 1866 5257 5258 1852 5259 5260
29 5261 1454 5262 1740 4562 5263 5264 5265 5266 5267 5268 1361 1573 5269 5270 4575 161 4559 5271 5272 1630 5273 5274 5275 1692 5276 674 5277 5278 5279 5280 168 5281 750 5282 5283 5284 5285 5286 5287 2299 5288 5289 2237 5290 5291 5292 5293 254 5294 5295 5296 5297 5298 5299 1237 5300 2658 5301 5302 5303 5304 5305 5306 5307 5308 5309 5310 2267 5311 5312 5313 5314 2548 5315 5316 1653 5317 2610 2692 5318 5319 5320 1011 5321 5322 5323 5324 5325 5326 5327 5328 5329 5330 5331 5332 5333
30 5334 5335 5336 5337 5338 1198 1931 1789 1309 1886 1632 5339 1565 5340 716 5341 5342 5343 5284 5344 5345 5346 5347 5348 5349 5350 5351 5352 5353 5354 5355 5356 5357 5358 5359 5360 5361 5362 5363 5364 5365 5366 5367 615 5368 5369 5370 5371 5372 5373 5374 566 5375 191 5376 5377 5378 5379 5380 1251 5381 4936 5382 5383 5384 5385 5386 5387 5388 5389 5390 5391 5392 5393 5394 5395 704 1560 5396 5397 5398 5399 604 5400 5401 5402 5403 5404 5405 5406 5407 5408 1554 1871 954 5409 1364 5410 5411 5412 5413 5414 5415 5416 5417 1713 5418 5419 5420 5421 3353 5422 5423 5424 5425 5426 5427 5428 5429 5430 1658 5431 5432 5433 106 5434 5435 10 5436 5437 150 975 5438 1212 5439 605 5440 5441 1695 5442 76 4548 5443 5444 978 647 5445 5446 5447 5448 5203 1868 5449 5450 5451 1787 4107 1383 5452 1870 5453 5454 5455 5456 607 38 5457 5458 1346 5459 5460 5461 5462 5463 5464 5465 5466 5467
31 5468 5287 954 5469 5470 1931 5471 4549 960 5472 5473 5474 5352 4892 1010 5475 724 5476 5477 1925 1916 718 5478 5479 5480 5481 5482 5483 5484 660 404 5485 5486 5487 5488 10 734 5489 2412 5490 715 962 5491 5492 732 1905 5493 4930 5494 5495 5496 5497 5498 5499 5500 5501 5502 5503 5504 5505 5506 2202 5507 4958 5508 1423 5509 5510 4585 5511 5512 4938 5513 5514 5515 5516 5517 5518 5519 5520 5521 5522 5523 5524 5525 5526 5527 48 5528 5529 2273 5530 3234 2388 5531 5532 5533 5534 5535 5536 5537 1582 5538 4627 5539 5540 5541 4976 5542 5543 5544 5545 5546 5547 5548 5549 5550 5551 5552 5553 5554 5555 5556 5557 5558 2721 5559 5560 5561 2489 5562 5563 2673 2697 5564 5565 337 2496 5566 2887 5567
32 684 5568 5569 191 5570 5571 5572 5573 5574 5575 5576 5577 5578 5579 5351 5580 5581 5404 5582 392 5583 5584 5585 5586 5587 5588 5589 5590 5591 5592 5593 5594 5595 5596 5597 4211 5598 5599 5600 5601 5602 5603 5604 5605 5606 5607 5405 5608 5609 5610 5611 5612 5613 5614 5615 5616
33 1550 5617 5618 5619 5620 1615 1617 4783 5621 5622 5623 5624 444 1595 2832 5625
34 191 5626 251 5627 166 5628 5629 5630 5631 1868 172 186 286 153 5632 5633 154 5634 16 5635 5636 5637 5638 5639 5353 298 335 5640
35 1063 1633 5641 5642 5643 674 1679 5445 1069 136 679 175 5644 161 1004 5645 5646 5647 993 220 5648 5594 5649 5650 5651 5652 107 5599 1379 5653 5654 397
36 5655 5656 5657 5289 5658 5659 3626 5660 5661 180 5662 5663 5664 5665 5666 220 5667 5668 1063 5669 5670 1652 5671 5672 1075 5673 5674 5675 5676 5677 5678 5679 5680 5681 5306 5682 5296 5683 120 5684 5685 5686 5687 1596 1344 4908 5688 5689 968 5690 5691 5692 5693 5694 5695 5696 2562 607 5697 5698 5699 5700 5701 5702 5703 5704 56 5705 5706 1814 1785 5707 3670 5708 5709 1701 5710 4887 594 641 5711 5712 622 5713 395 5714 5715 1819 5716 5717 5718 5719 5720 1471 5721 5722 5723 5724 5725 5726 1816 5727 5728 5729 5730 5124 5731 5732 432 5733 5734 2787 5735 5736 666 5737 789 5738 5739 5740 5741 5742 5743 121 5066 3222 5744 1994 5745 5746 439 5747 793 5748 5749 796 447 1367 5750 5751 696 5752 5753 5754 5755 5756 5757 5758 5759 5760 5761 5762 5763 5764 5765 5766 5767 5768 5769 5770 5771 1533 5772 5773 5774 5775 2999 5229 5776 5777 5778 5779 5780 2056 5781 5782 5783 5784 5785 5786 4621 5787 5788 5789 3613 915 5790 957 5370 5791 5792 5793 5794 5795 5796 5797 934 5798 5799 5800 5801 5802 3030 1463 5803 5804 5805 5806 5807 5808 5809 5162 3745 5810 5811 5812 5813 5814 5815 5179 5816 5817 5818 5819 5820 435 5821 5822 5823 5824 820 5825 5826 5827 5828 5829 5830 5831 3208 5172 3956 5832 5833 5834 5835 5836 3968 5837 5838 5839 710 5840 5841 5842 5843 5844 5845 5846 5847 5848 5849 5850 5851 5852 5853 5854 4390 5855 2116 5856 5857 5858 1577 5859 5860 4196 5861 5862 5863 4383 4449 5864 5865 4228 5866 5867 4395 4523 5868 5869 5870 5871 5872 5873 5249 3965 5874 5875 5876 5877 5878 5879 5880 5881 5882 5883 5884 5885 5886 5887 5888 5889 5890 5891 5892 5893 5894 5895 5896 5897 5898 5899 5900 5901 5902 5903 5904 908 5905 5906 5907 5908 5909 5910 5911 5912 5913 5914 5915 5916 5917 5918 5919 5920 5921 5922
37 5923 5924 5925 570 5926 5927 5928 5929 967 5930 5931 4778 5932 5933 680 5934 1006 5935 5936 1424 5937 4784 5938 5939 5940 1356 5941 5942 5943 5944 380 1647 5945 4788 1435 5946 5947 5948 5949 5950 5951 5952 5953 609 612 393 4782 5954 5955 656 5956 5957 1065 5958 5959 103 5960 5961 5962 5963 1981 718 5644 5964 5965 5966 1094 5967 971 1200 1885 5968 5969 5970 1361 5971 5972 1998 167 5973 5974 1803 117 5975 5976 5977 5978 1063 580 1423 5979 56 1807 4593 1382 5980 622 4916 5981 5982 233 5983 5984 5985 5986 5987 5988 5989 5990 136 5991 5992 5993 2428 5994 5995 5996 5997 5998 379 1917 5999 1989 6000 6001 6002 6003 6004 1564 6005 6006 6007 175 6008 6009 6010 6011 2071 5466 6012 6013 6014 6015 2037 630 6016 6017 6018 6019 6020 6021 6022 6023 6024 6025 1756 6026 6027 2313 6028 6029 6030 6031 6032 4905 1728 6033 6034 6035 6036 6037 6038 6039 5524 6040 1452 6041 5509 6042 6043 2242 6044 6045 4815 6046 6047 751 6048 2122 2362 6049 6050 6051 1017 6052 6053 6054 1908 6055 1168 6056 6057 5017 78 1792 6058 6059 5546 6060 5306 6061 2710 6062 4588 6063 6064 6065 6066 6067 6068 5740 4804 6069 6070 6071 6072 6073 5315 6074 6075 6076 6077 593 5648 6078 746 6079 6080 2346 2778 6081 1108 4647 6082 6083 6084 4828 1073 6085 4823 1153 6086 2599 6087 6088 6089 6090 2239 6091 6092 4061 6093 6094 6095 6096 161 220 388 6097 6098 5087 6099 6100 6101 2230 6102 6103 6104 6105 6106 6107 6108 643 6109 4669 6110 6111 2733 1820 6112 5115 4621 6113 6114 2695 6115 5852 6116 6117 6118 6119 6120 6121 6122 6123 6124 6125 2222 6126 6127 6128 6129 1049 4681 6130 6131 1892 6132 6133 6134 6135 1254 6136 1027 1474 4831 6137 1832 6138 6139 6140 633 6141 6142 6143 6144 6145 6146 6147 6148 3767 5310 6149 6150 6151 6152 3561 3754 6153 6154 6155 6156 6157 6158 5873 6159 6160 3542 6161 6162 1308 6163 6164 6165 6166 6167 6168 6169 6170 2358 6171 1140 6172 6173 6174 6175 6176 6177 6178 6179 6180 6181 6182 6183 1337 6184 6185 6186 6187 3635 1292 6188 6189 6190 6191 6192 6193 6194 6195 6196 6197 6198 6199 6200 6201 6202 5897 6203 6204 6205 6206 6207 6208 6209 1838 6210 6211 1843 6212 6213 6214 5866 6215 6216 5108 6217 6218 6219 6220 1318 6221 5922 6222 6223 6224 6225 6226 5134 6227 6228 6229 6230 6231 6232 6233 6234 6235 6236 6237 6238 5753 6239 6240 6241 6242 6243 6244 6245 6246 6247 6248 6249 6250 545 6251 6252 6253 6254 6255 6256 6257 6258 6259 6260 6261 6262 6263 6264 6265 4878 6266 3525 5786 2801 6267 6268 6269 6270
38 6271 6272 6273 6274 6275 6276 6277 6278 6279 6280 6281 6282 1539 6283 6284 6285 374 6286 4043 6287 6288 6289 6290 6291 6292 6293 6294 6295 3071 6296 2232 3187
39 6297 6298 6299 6300 6301 6302 6303 6304 6305 6306 6307 6308 5973 6309 6097 6310 6311 6312 6313 6314 1573 4806 6315 6316 6317 6318 5961 6319 3378 4941 6320 1593 6321 6322 6323 6324 6325 5736 6326 6327 6328 5727 6329 6330 5197 6331 6332 6333 6334 6335 6336 6337 6338 6339 6340 6341 6342 6343 6344 6345 6346 6347 6348 6349 1536 6350 6351 6352 6353 4909 6354 6355 6356 6357 6358 6359 6360 6361 6362 6363 5283 6364 6365 6366 4776 6367 5952 6368 6369 6370 6371 6372 315 6373 6374 6375 6376 5294 6377 367 6378 6379 6380 6381 6382 6383 6384 1414 1031 6385 6386 6387 368 6388 6111 4559 6389 6390 6391 6392 6393 6125 6394 6395 136 6396 6397 6398 5734 6399 6400 6401 6402 6403 1814 6404 6405 6406 6135 6407
40 6408 6409 6410 6411 6412 6413 6414 6415 6416 6417 6418 6419 6420 6421 6422 6423 6424 6425 6426 6427 6428 6429 6430 6431 6432 6433 6434 6435 6436 6437 6438 6439 6440 6441 6442 6443
41 54 6444 6445 6446 6447 1665 6448 5805 1360 6449 6450 1034 6451 6452 6453 1344 6454 1237 6455 6456 6457 6458 6459 5152 1663 6460 6461 6462 6463 6464 6465 6466 6467 6468 6469 6470 6471 1357 1068 1777 6472 6473 6474 6475 6476 6477 6478 6479 6480 1359 6481 835 640 6482 6483 6484 970 6485 6486 6487 6488 6489 5684 6490 1948 6491 1273 1747 6492 6493 1449 1141 1754 1018 6494 6495 820 6496 6497 6498 6499 6500
42 6501 6502 5964 6503 6504 409 6505 4936 6506 986 6507 6508 22 344 6509 6510 395 5248 2015 6511 6512 226 3085 150 121 10 6513 153 6514 6515 166 154 172 186 5628 6516 191 251 5635 1417 6517 286 1428 6518 90 6519
43 6520 6521 6522 1798 6523 6524 4807 417 6387 6525 6526 5923 6527 6528 6529 5780 5655 6530 6531 6532 6533 6534 6535 6536 6537 6538 6539 6540 6541 6542 6543 6544 6302 701 6545 6546 6405 6547 6548 6549 6550 6369 6370 6371 6551 732 6552 6553 746 5501 6554 6555
44 6503 6556 6557 6558 6559 6560 6561 6562 5581 6563 5823 6513 6564 5584 6565 4923 1592 6566 5575 6567 6568 1555 6569 6570 1574 6571 6572 6573 5339 6574 6575 6576 6292 6577 6578 6579 719 6580 6581 1541 1546 1559 6582 1603 6583 6584 6585 6586 6516 6587 723 439 5401 6588 405 6589 6590 5406 6591 6592 6593 6594 6595 987 6596 6597 6598 6599 6600 6601 6602 5433 6603 6604 6605 6606 6607 6608 6609 6610 6611 6612 6613 6614 6615 6616 6617 6618 6619 6620 6621 6622 2079 6623 6624 6625 1974 6626 6627 6628 6629 6630 6511 6631 5370 6632 6633 6634 6635 4945 6636 6637 4951 6638 6639 6640 4897 6641 6642 6643 6644 6645 6646 6647 6648 6649 6650 6651 4952 6652 5153 6653 6654 6655 6656 6504 2160 6657 6658 6659 5573 6660 6661 6662 6663 6664 6665 6666 6667 6668 5776 6669 2142 6670 4932 5369 6671 6672 5368 6673 5378 6674 6675 6676 6677 1540 6678 6679 6680 6681 6682 6683 6684 6685 6686 6687 6688 6689 6690 6691 6692 647 6693 6694 6695 6696 6697 6698 6699 6700 4968 6701 5355 6702 6703 6704 5725 6705 6706 6707 4977 6708 6709 6710 6711 6712 6713 6714 6715 6716 4982 6717 6718 209 6719 6720 6721 6722 6723 6724 6725 6726 5580 6727 4988 6728 6729 6730 6731 6732 6733 6734 6735 6736 4998 6737 6738 6739 6740 6741 6742 6743 6744 6745 6746 6747 6748 6749 6750 5014 6751 6752 6753 6754 6755 6756 6757 6758 6759 6760 6761 6762 6763 5036 6764 5360 444 6765 6766 6767 6768 6769 6770 6771 6772 6773 6774 2478 6775 5001 2098 6776 517 3103 6777 5544 6778 5041 6779 5015 5043 442 2602 1388 6780 6781 6782 6783 6784 6785 3097 6786 6787 2648 2759 6788 6789 5066 6790 6791 2726 6792 6793 1554 6794 6795 6796 6797
45 6532 367 679 6798 6799 2161 725 6800 6801 136 628 5501 1573 6802 6803 6804 6805 6806 5506 746
46 700 6807 6808 6809 6810 447 1811 6811 6812 4935 6813 6814 6815 3864 6816 5147 6817 6818 6819 6820 6821 6822 6823 6824 1707 6825 6826
47 1069 6827 6828 5151 6829 6830 6831 6832 6833 6834 6835 6836 6837 6838 6839 6840 6841 6842 6843 6844 6042 683 6845 6846 6847 6848 6849 6850 6851 6852 6853 6854 6855
48 1565 6856 6857 6514 6858 6859 6860 5601 114 4892 5378 6861 6862 5370 5604 29 3085 6602 6863 6729 6864 6656 5823 126 432 6865 6866 6867 6868 6869 168 1006 6870 6871 310 6872 6873 6874 5581 6875 6876 6877 6878 6879 6880 6881 6882 6883 355 6884 6885 6886 6763 6887 6888 6889 6890 5225 6891 1294 6892 6893 6894 3740 6895 3785 5784 6708 6896 3877 6897 6898 6899 3955 6900 6901 6902 6903 648 6904 393 5431 6905 38 56 6906 6827 6907 48 5926 388 6908 6909 978 6910 6911 6912 73 6913 5101 6914 6617 959 643 60 6915 6916 6917 6918 6919 5404 44 43 137 773 6920 5597 6921 6922 6923 1585 6924 99 6925 6926
49 6927 6928 2775 6929 6930 6931 6932 6933 6934 5923 6935 2832 6936 6937 6938 6939 6940 1963 6941 6942 6943
50 6944 6945 6946 6947 6948 6949 6950 6951 6952 6953 6954 6955 6956 6957 38 6958 6959 6960 6961 6962 6697 6963 6964 6965 6966 6967 763 5441 6968 6969 6970 6971 166 6972 6973 6974 6975 1869 6976 6977 4948 6978 6979 6980 6981 58 6982 6983 6984 6985 6986 6987 6988 6989 6990 755 6991 1404 6992 6993 6994 1406 6995 6996 6997 6998 6999 251 7000 7001 7002 7003 6564 7004 7005 7006 7007 7008 7009 7010 7011 6806 7012 7013 7014 7015 7016 7017 7018 7019 7020 2035 7021 7022 7023 6877 6567 7024 7025 5411 7026 7027 5605 7028 7029 7030 7031 7032 449 7033 5676 6674 7034 1031 5481 623 7035 7036 7037 7038 7039 7040 7041 7042 4591 7043 7044 2390 7045 7046 1836 7047 3343 1833 6830 7048 5794 3504 7049 3574 3484 2858 7050 1185 6769 7051 7052 7053 7054 7055 854 7056 7057 7058 7059 7060 7061 7062 7063 7064 7065 7066 7067 3982 7068 7069 7070 844 7071 7072 7073 3937 7074 7075 4146 7076 7077 7078 7079 7080 7081 7082 4273 3529 4462 7083 7084 869 7085 7086 7087 7088 7089 7090 7091 5964 7092 4372 762 7093 7094 7095 7096 7097 7098 7099 7100 5784 7101 6634 7102 7103 7104 7105 7106 7107 7108 7109 7110 7111 7112 7113 7114 7115 7116 7117 7118 7119 7120 7121 7122 7123 7124 7125 7126 7127 7128 7129 6884 7130 7131 7132 7133 7134 7135 7136 7137 7138
51 7139 1915 7140 551 1918 2219 7141 7142 7143 7144 7145 7146 7147 7148 7149 7150 2133 7151 7152 7153 7154 7155 2184 7156 7157 7158 7159 7160 2240 7161 7162 2277 5535 2244 7163 1431 7164 2360 7165 7166 7167 7168 7169 2388 7170 5543 7171 3590 2324 7172 7173 7174 7175 7176 7177 2563 7178 2936 7179 7180 7181 3012 7182 3235 7183 7184
52 68 1868 1384 2 1960 7185 7186 4892 7187 7188 7189 79 7190 7191 711 7192 5595 85 43 64 7193 62 123 125 71 4940 70 77 5338 7194 7195 325 7196 7197 3839 6827 7198 66 7199 228 7200 48 6909 7201 6918 7202 7203 45 99 7204 130 1320 1364 721 7205 7206 7207 134 7208 527 76 118 10 3075 21
53 7209 7210 1643 7211 7212 7213 659 1084 167 596 5459 6566 7214 7215 1674 7216 6510 1653 7217 5444 7218 7219 7220 7221 7222 4938 388 7223 7224 6528 2325 7225 374 7226 7227 1924 7228 662
54 7229 7230 7231 7232 143 7233 5444 7234 7235 1401 7236 7237 7238 7239 7240 5741 5659 7241 7242 7243 1391 4557 720 1211 6310 7244 1998 552 7245 5270 1212 7246 7247 7248 1978 7249 7250 7251 7252 7253 378 7254 2048 573 7168 7255 7256 7257 7258 7259 575 7260 7261 7262 7263 6648 4580 7264 7265 7266 7267 7268 7269 7270 7271 7272 4599 7273 7274 7275 7276 7277 7278 7279 2205 7280 7281 2159 7282 7283 1792 7284 2276 7285 7286 7287 7288 1485 7289 103 7290 4614 5775 7291 388 7292 4559 2086 7293 7294 7295 7296 7297 7298 2311 1500 6529 2308 7299 7164 7300 6050 7301 7302 7303 7304 7305 7306 7307 7308 7309 4628 7310 1691 4815 2521 7311 4610 7312 7313 7314 2619 7315 7316 4621 7317 7171 7318 5535 7319 7320 557 7321 7322 7323 7324 7325 7180 7326 7327 6933 6133 2184 7328 7329 7330 2244 7331 377 1364 681 527 2733 7332 666 7333 6380 7334 7228 7335 2421 7175 7336 7337 7338 7339 7340 4652 1115 7341 2576 2625 2555 5102 2408 5094 7176 2482 2613 2569 7342 7343 7344 2893 7345 7346 782 359 7347 2695 7348 7349 7350 2805 7351 7352 1934 2936 4669 1033 7353 5115 7354 7355 7356 3031 7357 3173 7358 7359 2801 4690 2082 2692 7360 7361 7362 3081 7363 7364 7365 7366 7367 3101 7368 5333 7369 7370 7371 7372 3676 5310 7373 5293 7374 3968 7375 1814 4132 5706 4153 7376 3988 4279 4731 4539 1769 2610 593 7377 7378 7379 7380 7381 7382 7383 7384 7385
55 7386 7387 7388 7389 7390 7391 7392 7393 7394 7395 7396 136 7397 7398 6046 7399 7400 5355 1101 7401 7402 7403 1712 7404 1042 3 5505 671 47 7405 7406 1063 89 5644 114 7407 1363 7408 7409 684
56 983 5437 1637 16 7410 972 7411 7412 6563 7413 7414 7415 7416 1269 7417 6624 7418 7419 7420 7421 7422 7423 7424 7425 5414 7426 7427 1031 6502 7428 7429 7430 7431 7432 7433 7434 5225 7435 7436 7437 7438 7439 7440 7441 7442 7443 7444 7445 2121 7446 7447 7448 2712 6273 1014 6871 7449 2953 7450 7451 7452 7453 7454 7455 3554 7456 2467 7372 3911 3906 7457 7458 7459 3480 3636 7460 7461 4240 7462 3427 1227 7463 1837 7464 7465 7466 7467 7468 7469 7470 6845 7471 7472 7473 7474 390 7475 79 7476 7477 7478 7479 6137 7480 7481 7482 114 670 7483 7484 7485 7486 66 13 5725 1899 49 56 7487 7488 673 3073 7489 7490 7491 7492 7493 7494 7495 7496 7497 7498 7499 5671 7500 1798 5602 7501 7502 6528 29 17 7503 40 7504 7505 7506 7507 705
57 117 38 7508 103 7509 718 7510 7511 1931 7240 7512 2412 7513 7514 4886 7515 726 7516 7517 7518 7519 5496 7520
58 7521 7522 7523 7524 7525 7526 7527 7528 7529 7530 7531 5613 7532 7533 7534 7535 7536 7537 7538 7539 7540 7541 7542 7543 7544 428 7545 7546 7547 7548 7549 7550 7551 7552 7553 7554 7555 7556 6279 7557 7558 7559 7560 7561 7562 7563 7564 7565 167 5648 7566 7567 178 6411 7568 687 7569 7570 7571 7572 7573 7574 7575 7576 7577 7578 7579 7580 7581 7582 7583 7584 7585 7586 7587 7588 7589 7590 539 7591 7592 7593 7594 7595 7596 7597 7598 7599
59 7600 7601 7537 7602 7603 7604 7605 7606 7607 7608 6279 5627 7609 7610 7611 6283 7612 7613 7614 7615 7616 7617 7618 7619 7620 7621 7622 7623 7624 7625 7626 5370
60 7627 7628 7629 7630 7631 7632 7633 7506 7634 7635 7636 5703 7637 7638 7639 1951 7640 7641 7642
61 7643 5384 7644 7645 7646 687 7647 1495 7648 7649 7650 7651 7652 7653 7654 7655 7656 7657 7658 7659 7660 7661 7662 4590 7663 7559 7664 7665 7666 5459 7667 7573 7668 7669 7670 7671 7672 7673 7674 7675 7676 7677 7678 7679 7680 7681 7682 7683 3178 7684 7685 7686 7687 7688 7689 6432 7690 7691 7692 7693 7694 7695 7696 7697 7698 7699 7700 7701 7702
62 134 7703 7704 7705 7706 7707 7708 7709 7710 3302 7711 203 5135 7712 7713 7714 7715 5097 4292 7716 7717 7718 7719
63 7720 7721 7722 7723 7724 1463 7725 1435 7726 7727 4564 7728 7729 1614 1412 1414 7730 7731 7732 1635 7733 1426 7734 4830 1438 4899 7735 7736 7737 7738 1787 7739 1428 7740 7741 7742 7743 7479 1423 4561 7744 7745 5203 6362 7746 7747 7748 6340 7749 7750 7751 2094 2426 5426 7752 7753 7754 7755 1672 7756 7757 7758 7759 7760 7761 325 7762 7763 7764 2720 7765 7766 7767 7768 2673 7442 7769 5286 7770 6075 7771 7772 7773 7774 1465 7775 7776 3053 7777 7778 1237 7779 7780 1029 4972 7781 7782 7783 7784 7785 7786 7787 5326 7788 5444 608 7789 7790 7791 1690 627 7792 3761
64 7793 7794 7795 7796 7797 7798 7799 7800 6277 7801 5581 7802 7803 775 1868 6513 5584 7804 7805 4892 90 7806 7807 7808 183 7809 7810 7811 7206 7812 6918 7813 7814 7815 7816 6909 6304 7817 43 7818 7819 7820 270 7821 7822 7409 53 7823 7824 7825 1320 157 721 7826 7827 7828
65 7 0 7829 7830 418 7831 22 7538 7832 6 1911 194 7833 215 19 7202 5703 7834 5466 4562 7835 175 7836 7837 7838 428 7307 7839 7840 7841 115 7842 7843 2396 3347 7844 2010 7845 143 7846 7847 7848 7849
66 7850 1928 4562 4582 7851 7852 1 7853 7269 7854 7855 7856 7857 7858 7859 5751 2126 7860 7861 3590 7862 7863 1438 7864
67 151 6566 7865 7866 7867 114 7868 670 191 4894 29 6603 7869 656 7870 5433 7871 7186 278 7872 6748 5452 7873 7874 10 1554 1871 5434 7875 2413 7876 7877 7878 7879 203 7880 6774 7881 7882 7883 1069 1003 344 7884 7885 7886 7887 7888 7889 7890 6254 1710 7891 7892 7893 7894 770 7895 7088 7896 7897 7898 7899 7900 7901 7902 7903 7904 1924 7905 7906 7907 7908 2145 7909 7910 7911 7912 7913 7914 7915 7916 7917 7918 7919 7920 7921 7922 7923 7924 7925 7926 7927 7928 7929 7930 7931 7745 7932 7933 7934 7935 7936 5987 7937 7938 7939 6494 7940 7941 1337 7942 2571 7943 7944 7945 691 7946 7947 7948 7949 7950 7951 7952 7953 7954 7955 7956 894 7957 7958 7959 3207 7960 7961 7962 7963 7964 7965 7966 7967 7968 7969 2240 7970 5225 7971 7972 7973 7974 7975
68 5433 54 3564 7976 72 7977 7978 7979 7980 7981 7982 7983 5476 7984 5440 6618 4897 7985 7986 7987 7988 7989 7990 7991 7992 7993 7994 5446 4895 7995 7996 5403 5335 7997 7998 7999 6732 8000 8001 8002 5423 8003 8004 8005 8006 6908 8007 723 8008 8009 617 5823 1435 8010 6643 8011 8012 6639 8013 8014 5400 8015 4981 8016 8017 167 6568 564 8018 5491 175 8019 8020 8021 137 8022 5356 8023 6976 8024 2134 8025 8026 8027 8028 705 8029 8030 8031 5447 8032 8033 8034 6582 8035 631 8036 8037 8038 7915 8039 640 1566 398 2000 8040 5346 8041 6624 4923 8042 8043 8044 8045 1916 8046 6511 8047 1075 8048 8049 8050 6925 8051 5450 6591 1573 8052 8053 8054 1755 7517 8055 136 6654 8056 572 4939 8057 8058 101 8059 8060 1781 5364 6497 8061 6515 6652 8062 8063 8064 403 6915 6691 8065 6620 4944 6640 8066 190 8067 6923 8068 8069 7512 8070 8071 8072 8073 76 1097 708 1780
69 8074 208 8075 8076 4892 8077 8078 8079 4601 2062 8080 8081 8082 8083 8084 8085 5784 8086 516 1857 8087 8088 8089 8090 8091 8092 8093 132 8094 226 721 8095 8096 8097 429 8098 8099 8100 6506 7409 7406
70 5422 5452 8101 5350 1557 7191 1925 8102 8103 775 4936 34 8104 5498 8105 8106 8107 8108 7023 8109 7391 8110 8111 8112 686 6718 1573 8071 8113 483 8114 8115 2080 4945 8064 8116 8117 8118 170 8119 8120 2001 4592 1031 8121 8122 8123 4962 4785 8124 8125 4976 428 8126 240 8127 7300 7445 1017 8128 265 1582 8029 8 7471 8129 8130 8131 8132 2441 8133 253 8134 8135 8136 448 268 444 8137 1994 5022 8138 8139 8140 6763 8141 8142 8143 8144 8145 5560 8146 8147 8148 8149 5559 6031 8150 8151 5225 8152 8153 8154 8155 8156 8157 8158 254 8159 8160 310 8161 8162 8163 2757 5066 8164 8165 2852 2878 8166 8167 8168 355 8169 8170 364 6872 8171 8172 8173 5728 8174 3275 6884 6882 8175 8176 8177 8178 8179 8084 8180 8181 8182 8183 5784 8184 8185 8186 8187 8188 8189 8190 8191 8192 8193 3537 3785 8194 6883 8195 8196 6898 6897 5171 8197 8198 3886 5346 8199 8200 8201 8202 8203 6711 8204 8205 8206 8207 3970 8208 8209 2167 8210 8211 8212 8213 8214 8215 8216 8217 8218 5858 8219 8220 4423 8221 8222 8223 8224 8225 8226 8227 8228 8229 8230 8231 8232 8233 8234 8235 8236 8237 8238 8239 8240 8241 8242 8243 8244 8245 8246 8247
71 8248 8249 8250 696 700 8251 8252 8253 8254 8255 8256 1866 8257 673 2410 8258 8259 8260 8261 8262
72 374 103 5991 8263 6792 8264 1294 8265 1252 8266 8267 6169 545 8268 8269 3911 8270 8271 8272 8273
73 106 8274 8275 7984 4892 68 8276 4559 155 8277 1921 7200 8278 8279 8280 694 8281 8282 136 4944 8007 968 6453 7279
74 8283 8284 727 8285 8286 8287 1911 8288 8289 8290 5980 8291 8292 8293 8294 8295 8296 8297 8298 8299 8300 8301 6020 8302 8303 1884 1673 8304 5292 8305 4590 8306 7492 8307 8308 8309 8310 8311 8312 8313 8314 2421 8315 8316
75 8317 7492 8318 6533 8319 8320 8321 8322 8323 6546 8324 8325 8326 8327 8328 5328 6549 8329 8330 8331 6346 5679 114 4785 8332 6275 373 8333 8334 8335 8336 8337 670 6387 8338 8339 8340 8341 8342 8343 8344 49 6550 6370 1861 8345 8346 8347 1573 8348 387 1426 6371 8349 8350 8351 6530 8352 8353 5837 8354 8355 5838 8356 8357 2036 8358 5840 8359 6874 8360 8361 8362 8363 8364 8365 4956 8366 4815 8367 8368 8369 4817 8370 8371 8372 8373 8374 447 8375 8376 1709 8377 2374 8378 8379 5546 5655 8380 6523 8381 13 7442 8382 8383 6407 4797 8263 8384 8385 1798 8386 5682 4806 8387 8388 8389 1890 5406 8390 5950 4938 2609 8391 8392 1814 8393 5066 8394 2427 5951 8395 8396 4808 8397 717 5108 5468 835 8398 5953 8253 8399 5257 8400 8401 8402 1797 8403 8404 8405 8406 8407 609 3437 8408 8409 8410 8411 8412 612 8413 6196 6238 8414 8415 6197 2428 8416 8417 8418 8419 8420 8421 5489 8422 1792 8423 8424 8425 8426 6363 8427 2410
76 8428 390 684 687 7995 967 7243 1090 8429 5964 1063 8430 167 1424 5441 1364 6030 5641 120 8431 8432 5352 4922 8433 8434 8435 8436 8437 4942 8438 720 8439 7471 5644 2268 4938 8440 2407 975 8441 7228 674 8442 8443 8444 17 114 647 73 102 8445 8446 187 5438 3 1769 7331
77 8447 8448 674 8449 8450 8451 7318 2244 5540 8452 8453 8454 4694 8455 8456 2688 8457 8458
78 8459 8460 8461 8462 8463 8464 8465 5445 8466 8467 8468 8469 8470 8471 1364 5787 1438 8472 8473 5646 8474 1115 7228 8475
79 8476 8477 568 1 8478 215 8479 1201 8480 5414 8481 8482 8483 8484 8485 569 90 278 8486 8487 1427 8488 8489 3670 562 8490 8491 8492 1362 8493 8494 8495 1062 8496 167 1096 8497 8498 8499 5654 1643 1067 8500 8501 1797 8502 8503 4938 8504 1147 1644 8505 2276 4962 367 1620 1658 1767 8506 8507 8508 4610 8509 1695 8510 6043 8511 8512 3374 8513 1017 8514 7167 8515 2342 8516 8517 171 8518 8519 1120 2268 1169 6506 8520 2406 8521 5505 775 6061 8522 8523 211 8524 8525 8526 8527 1431 8528 8529 5966 1250 8530 1373 7213 8531 8532 1235 576 2854 1349 8533 3 7442 7418 1008 1649 1255 8534 8535 1028 8536 8537 8538 8539 8540 7752 8541 7445 1254 5971 5108 8542 4661 1688 8543 4653 5942 1504 1014 8544 8545 8546 8547 8548 8323 8549 8550 8551 8552 8553 656 8554 8555 8556 8557 8558 5134 1051 8559 8560 8561 8562 635 627 277 8563 8564 8565 8566 8567 1447 27 8568 7730 8569 3389 8570 8571 1412 8572 8573 8574 6830 8575 8576 2260 8577 8578 1841 8579 1205 6884 8580 7486 8581 8582 8265 8583 8584 2758 2490 8585
80 8586 8587 7985 8588 7692 6770 8589 1492 373 114 13 374 8590 8591 8592 8593 156 4560 8594 8595 8596 8597 4555 8598 8599 569 8600 5406 8601 5360 8602 564 8603 8604 8605 6757 8606 8607 8608 8609 8610 8611 8612 8613 5630 5622 8614 8615 8616 5629 8617 8618 8619 8620 8621 8622 8623 8624 775 8625 8626 8627 8628 7202 8629 8630 8631 5631 8632 8633 8634 8635 8636 8637 8638 8639 8640 8641 8642 8643 8644 8645 8646 8647 8648 8649 8650 8651 8652 5632 8653 8654 8655 8656 8657 6279 8658 8659 3107 8111 8660 8661 8662 8663 8664 8665 8666 8667 8668 8669 8670 8671 8672 8673 8674 8675 8676 8677 8678 2024 8679 8680 8681 335 8682 469 8683 8684 8685 8686 8687 8688 8689 8690 8691 8692 8693 8694 8695 8696 8697 524 8698 8054 91 8699 8700 205 8701 8702 567 8703 8704 8705 8706 8707 1572 5376 6556 8708 8709 8710
81 8711 8712 8713 8714 8715 8043 8716 6595 8717 6405 5617 1968 8391 8718 8719 8720 8721 8722 1798 8723 417
82 8724 7020 8725 8726 5596 8727 8728 8729 153 8730 8731 8732 8733 154 8734 8735 987 566 166 6650 8736 5481 8737 8738 1603 5444 8739 5385 975 8740 8741 617 8742 7019 7803 8743 5467 8248 8744 6649 8040 8745 6501 8746 8049 8747 8748 8749 5450 1957 6579 6610 719 5581 5377 6729 121 8750 5394 8751 8752 8753 8754 6510 3464 8755 6731 5769 5589 8756 5363 8757 5772 8758 8759 572 8760 8761 8762 8763 2035 6828 4938 6805 8764 8765 684 8766 4958 1573 8767 439 8291 4944 2080 8768 1572 8769 8115 8770 8771 6513 8772 8773 8774 8775 8776 8777 8778 4976 8779 8780 8781 8782 136 6671 8783 8784 2206 8785 8786 8787 8788 4956 5820 8789 8790 7790 608 8492 5457 8000 8791 4977 8792 8793 382 8794 8493 8507 5547 8517 7791 1 6350 5030 8795 8796 8797 6766 8798 8799 8800 7445 8801 6351 8802 7331 1763 8530 8803 8804 8805 86 8806 8807 8808 8809 2748 7205 8810 327 8811 8812 8813 8814 8815 8538 317 8816 562 5649 998 8817 8818 8819 8820 8821 8822 5114 191 3072 8823 8824
83 1379 8825 8826 1459 5438 684 8827 8828 1014 1626 8829 8830 8831 1460 7250 8832 8833 6132 1787 8834 1364 691 8835 1884 514 660 983 1485 1918 4956 8836 8837 136 1426 164 5281 4940 8838 1746 1034 171 1106 8839 5505
84 8840 8841 8842 1787 382 8843 8844 8845 8318 1393 8846 8847 8848 5217 426 4803 551 8849 8850 8851 8852 8853 8854 8855 8856 8857 8858 164 8859 90 171 8860 1849 8861 7220 6805 7156 7284 8862 431 136 8863 5780 6113 8864 8865 8866 2815 8867 7234 6938 8749 1252 8868 6785 8869 8870 8871 1651 1582 8872 8873 8874
85 8377 8875 8876 8877 1410 7724 1063 8878 8879 8880 1029 8881 8882 8883 5035 628 8884 1010 8885 7185 1074 8886 8887 7415 373 8888 8486 31 90 8438 8889 417 7260 8440 8375 6036 8890 8891 167 136 4938 993 679 4559 7016 8892 2400 8893 2209 8894 8895 8896 8897 1364 5389 8898 8899 175 5623 5989 4828 8900 5543 8901 8902 8903 171 8904 2376 593 8905 5691 5018 8906 8907 8908 4817 8909 5252 8910 8911 8912 8913 419 8914 2434 8915 8916 8917 8918 8919 2817 220 8920 8921 8922 8923 2576 7330 8924 1713 8925 8926 8927 8928 8929 8930 8931 2626 6374 8932 8933 2689 8934 8935 2733 8936 6116 5643 8937 5641 8938 5304 5115 8939 1138 8940 8941 8942 5337 5108 1165 8943 1282 8944 8945 8946 463 462 364 8947 5713 8948 5250 7375 8949 6082 8950 5949 8951 466 1823 4853 8952 8953 8954 5728 8955 1831 789 8956 1176 8957 8958 8959 1053 3351 1048 8560 8960 835 8961 8962 5794 8963 8964 8965 8966 5792 8967 8968 5799 8969 8970 4713 8971 8972 1023 8973 8974 8975 8976 8977 3697 5853 8978 8979 856 8980 8981 8982 8983 4008 8984 5211 8985 8986 8987 4359 5859 8988 4731 8989 8990 8991 8992 8993 8994 8995 8996 8997 5904 8998 8999 1168 1298 9000 6201 546 4055 9001 9002 9003 9004 9005 9006 8268 6260 9007 9008 9009 9010 9011 9012 5733 9013 9014 9015 9016 9017 8270 9018 9019 9020 9021 9022 9023
86 9024 5351 9025 2131 5631 8636 9026 9027 8639 6980 9028 9029 9030 9031 9032 8601 9033 9034 9035 9036 5346 8647 9037 9038 9039 9040 9041 9042 9043 9044 9045 7867 7002 5603 9046 9047 9048 9049 9050 9051 8708 9052 9053 9054 9055 9056 9057 9058 3566 9059 9060 9061 9062 9063 9064 9065 9066 9067 7028 9068 9069 9070 9071 132 6989 9072
87 54 9073 9074 9075 9076 9077 9078 5636 9079 9080 9081 9082 9083 9084 9085 9086 9087 9088 9089 5627 9090 7388 9091 9092 9093 9094 9095 9096 9097 9098 9099 9100 9101 9102 9103 9104 9105 9106 9107 9108 9109 9110 9111 9112 9113 9114 9115 7247 9116 9117 775 9118 120 9119 9120 9121 9122 9123 9124 9125 7617 9038 142 9126 9127 9128 9129 9130 9131 9132 9133 9134 9135 9136 9137 2074 9138 9139 9140 9141 9142 9143 9144 9145 551 9146 9147 9053 9148 9149 9150 9151 9152 9153 467 6904 9154 9155 9156 9157 9158 6946 9159 9160 9161 8729 91 9162
88 9163 9164 741 9165 5354 9166 9167 9168 6766 9169 9170 8790 9171 7345 9172 8938 1826 2624 9173 7339 9174 9175 9176 7272 7359 9177 2516 9178 9179 9180 9181 9182 9183 9184 9185 9186 9187 2496 9188 9189 9190 2576 5706 1814 9191 9192 9193 9194 9195 463 9196 9197 9198 1039 5713 8824 9199 7337 9200 9201 7375 8795 8374 9202 9203 3125 6127 9204 9205 9206 9207 3506 1831 4682 9208 1471 9209 7361 4683 2618 5124 9210 3153 9211 9013 9212 9213 9214 9215 1823 7370 8177 9216 2894 9217 3222 9218 9219 9220 9221 9222 9223 9224 5755 6138 9225 4499 3373 9226 9227 1181 9228 9229 5754 479 3274 9230 9231 9232 813 9233 4643 8963 9234 7047 4706 9235 9236 9237 9238 9239 9240 3663 9241 9242 9243 9244 3726 9245 9246 9247 9248 9249 9250 9251 1209 9252 9253 9254 9255 9256 7075 4212 4857 4373 9257 9258 8966 3767 9259 4437 4439 4600 2998 9260 9261 9262 9263 4313 1853 9264 9265 897 9266 6162 8421 8997 9267 9268 9269 9270 9271 4733 9272 9273 9274 9275 9276 754 9277 9278 9279 9280 9281 9282 9283 9284 9285 9286 9287 9288 9289 9290 9291 9292 9293 9294 9295 9296 2057 9297 9298 9299 9300 9301 9302 9303 9304 9305
89 9306 9307 9308 9309 7754 7289 9310 9311 9312 1427 1635 9313 8354 7253 8877 7775 1400 9314 9315 9316 9317 2287 9318 4830 9319 9320 555 9321 638 7292 570 5477 1875 7230 1391 6533 5654 7263 9322 6803 9323 9324 9325 4656 7299 1413 1887 1412 9326 8352 9327 712 7642 622 9328 9329 9330 9331 7259 4578 9332 9333 7730 6098 8355 9334 9335 9336 7238 9337 5308 9338 1426 2052 7319 9339 9340 9341 9342 9343 4593 9344 9345 4599 4579 1423 4603 4588 8029 9346 1998 9347 7273 8362 9348 5952 4552 9349 9350 4571 8493 6083 171 9351 2232 9352 580 5666 9353 7268 9354 9355 558 9356 9357 8363 7325 2087 686 8507 9358 9359 1573 4811 1120 9360 161 9361 9362 9363 8517 7256 1723 6007 2151 9364 9365 9366 9367 4610 9368 9369 9370 7308 423 419 5663 8841 4621 4587 4834 7328 8849 9371 431 9372 9373 9374 9375 6275 4910 4607 9376 5266 9377 9378 6076 9379 6929 9380 9381 1027 9382 9383 4793 2237 9384 9385 5786 1045 4619 2318 1030 9386 9387 4821 9388 2295 9389 7445 8907 9390 6075 9391 7732 6933 2376 2720 9392 4598 9170 7344 7751 2628 2387 2388 9393 4615 9394 2244 5305 5314 2684 2513 2658 6085 2483 9395 7348 7322 9396 7041 453 5303 9397 7374 9398 2482 4829 1217 8530 2599 9399 2516 9400 6380 9401 2733 1811 1137 2868 6133 5321 8452 9402 2752 6134 710 7443 2787 2801 458 9403 2754 9404 7346 8264 8392 9405 1128 1139 9406 5061 8538 9407 5116 9408 2893 5115 9180 6107 9409 9410 9411 9412 2805 4664 2998 1767 4646 4840 9413 2578 2605 9414 4673 7349 9415 4681 463 9416 8952 1474 9417 2867 9418 9419 3559 624 9420 8545
90 8051 4056 9421 9422 5355 9423 5349 6703 9424 6563 9425 2054 6573 9426 6567 5370 4894 9427 6624 6646 9428 9429 6691 4932 9125 9430 6700 9431 6719 6712 8130 6708 9167 9432 9433 9434 2726 5052 2832 6787 5712 9435 9436 5097 2853 9437 9438 2363 8150 9439 8109 9440 9441 9442 8151 9443 9444 5129 3047 9445 9446 9447 9448 3237 5136 9449 9450 9451 329 9452 9453 3002 9454 9455 9456 9457 9458 9459 9460 9461 9462 9463 5625 6939 9464 3510 3824 3685 9465 5168 9466 9467 9468 9469 9470 9471 9472 5259 9473 536 9474 9475 9476 9477 9478 9479 9480 9481 9482 9483 9484 9485 9486 9487 9488 9489 9490 9491 9492 7716 9493
91 9494 9495 9496 9497 9498 9499 7607 9500 9501 7697 1006 7527 9502 9503 9504 9505 774 9506 7576 9507 9508 9509 9510 9511 9512 9513 8344 7575 7587 1470 9514 9515 9516 9517 9518 9519 5639 7431 9520 9521 9522 9523 9524 9525 9526 9527 9528 7413 9529 9530 7559 9531 9532 9533 9534 9535 247 9536 9537 9538 9539 9540 9541 9542 9543 9544 9545 9546 9547 9548 9549 9550 9551 9552 9553 9554 9555 9556
92 9557 8002 9558 5442 6566 9559 6989 4981 9560 9561 191 4791 9562 5434 9563 5943 9564 9565 1925 4788 5354 9566 6863 9567 5631 1936 9568 9569 9570 9571 9572 6589 8750 4777 1896 569 9573 9574 6553 6673 9099 9575 9576 9577 9578 9579 9580 5630 560 9581 6271 9327 251 1955 5736 9582 6034 9103 9583 8767 6564 9118 9584 9585 9586 9587 7612 5983 9588 9589 9590 9591 9592 6550 9593 8620 8613 5990 9594 9595 2038 7023 7575 6326 2037 9596 9597 9598 9599 4801 8764 9600 9601 9113 5628 2074 9602 9603 8493 2036 131 8668 9604 8496 9137 8671 9605 4956 2028 190 9364 6285 4803 9606 9607 7619 4794 4827 9608 9609 9610 9611 9612 5820 9613 387 483 8670 9614 8601 9615 6000 9616 9617 3107 179 6279 9618 9619 9620 8782 9621 6026 6024 328 9622 8674 8062 6641 2071 9623 6331 9624 6023 9625 9626 6332 9627 6333 5683 142 8396 9628 8362 9629 9630 9631 6381 7623 9632 9633 5627 2156 9634 417 9635 9636 4804 9637 6637 9638 9639 6029 434 6635 9640 1358 9378 9641 9642 9643 9644 9645 9646 9647 8502 7424 9648 9649 9650 1954 9651 6648 9652 2095 8390 9653 9654 9655 9656 1971 9657 9130 8677 9658 9659 9660 176 6353 9661 9662 9663 6342 250 686 9664 1031 9665 9666 9667 1507 209 9668 8517 4810 184 9669 9670 9671 9672 8681 9673 298 9674 9675 6707 9676 6275 4937 9677 9678 9679 2197 4982 4812 9680 9681 335 9682 9683 9684 2333 9685 9686 9687 9688 9689 9690 9691 9692 9693 9694 9695 9696 4813 9697 9698 6045 9699 6096 9700 9360 9701 9702 461 9703 9704 9705 9706 469 6777 9707 9708 2272 2226 9024 2283 3134 9709 9710 9711 9712 9713 9714 9715 9716 9717 9718 9719 9720 9721 9722 9723 9724 9725 7445 9726 9727 9728 9729 248 9730 6345 8377 9731 5007 9732 6052 9733 4814 5824 9734 6775 254 9735 9736 9533 9737 4817 9738 9739 8511 9740 9741 9742 9743 9744 9745 9746 6067 5712 9747 9748 9204 9749 9750 9751 7031 9752 6723 9753 268 9754 9755 9756 9757 9758 2374 9759 9760 9761 9762 9763 2307 9764 9765 2357 9766 9767 9768 8263 9769 9770 9771 9772 6071 7138 9773 4821 9774 9775 1595 1793 5028 9776 780 9777 9778 9779 9780 6070 9781 2716 9782 9783 9784 9785 9786 7243 9787 9788 9789 9790 9791 9330 9792 9793 9794 5560 5985 9795 9796 9797 9798 9799 8694 8151 9800 9801 9802 1583 8145 9803 9804 476 9433 8153 9805 9806 9807 9808 9809 9810 9811 471 9812 9813 509 9814 9815 9816 9817 9818 9819 2958 2616 9820 9821 2632 9822 322 6382 9823 6383 9824 9825 9826 9827 9828 633 9829 6093 9830 8804 9831 9434 9832 6377 6788 1811 9833 9834 9835 9836 9837 9838 2745 2774 9839 9840 9841 4836 9842 9843 9844 9845 9846 9847 9848 7710 9449 9849 9850 9851 9852 9853 9854 9855 4837 9856 2883 1855 9857 9858 9435 9859 9860 9861 9862 9863 9864 6385 9865 9866 9867 355 9868 1801 9869 9870 9871 9872 4840 7064 9873 9874 9875 9876 9877 9878 9879 3062 9880 9881 2984 9882 3074 9883 9884 9885 9886 9887 6879 2907 9888 4842 6142 9889 3049 9890 9891 9892 9893 9894 9895 9896 9897 8553 9898 9899 9900 9901 1827 9902 9903 9904 9905 9906 9907 3456 9908 9909 9910 9911 9912 9913 9914 9915 8140 6149 9916 9917 4839 3306 9918 9919 9920 9921 9922 9923 3567 9924 9925 6035 9926 4846 9927 9928 9929 3531 9930 9931 9932 9933 3630 9934 9935 5801 9462 6196 3511 9936 9937 9938 484 9939 9940 9941 9942 492 9943 9944 9945 9946 9947 9948 9949 3526 9950 4848 9951 4854 9952 5850 9953 9954 9955 9956 9957 3650 9958 9959 9960 9961 9962 3970 9963 9964 9965 9966 9967 9968 9969 4856 8193 5855 9970 9971 5846
93 8031 9972 9973 9974 744 9975 9976 6648 9977 9978 8079 2205 6020 2333 9979 9980 9981 9982 9983 9984 260 9985 2237 9986 6040 693 9987 9988 9989 9990 9991 687 5647 1142 9992 2519 9993 2554 9994 9995 9996 9997 9998 9999 10000 6095 10001 10002 10003 10004 10005 10006 10007 5800 10008 10009 10010 10011 6376 10012 10013 10014 10015 3158 10016 10017 3292 10018 10019 10020 10021 4026 10022 9260 10023 9272 10024 10025 10026 10027 2431 1278 10028 2746 5784 10029 10030 4440 10031 10032 10033 10034 8269 10035 10036 10037 10038 10039 10040 10041 10042 10043 10044 10045 10046 10047 10048 9221 10049 10050 10051 10052 10053 1969 10054 3434 3872 10055 10056 10057 10058 10059 10060 10061 10062 10063 10064 10065 10066 10067 10068 3733 10069 10070 9413 10071 10072 10073 10074 10075 10076 10077 10078 6226 10079 10080 10081 10082 10083 10084 10085 4439 10086 10087 10088 10089 2838 10090 10091 10092 10093 10094 10095 10096 10097 5922 10098 1011 10099 10100 10101 10102 10103 10104 7904 10105 10106 10107 10108 10109 10110 10111 10112 10113 10114 10115 10116 10117 10118 10119 10120 10121 10122 10123 10124 10125 10126 10127 10128 10129 10130 10131 10132 10133 10134 10135 10136 10137 10138 10139 10140 10141
94 8433 10142 10143 10144 1010 10145 10146 8444 10147 10148 10149 7737 658 10150 10151 7219 10152 7489 10153 10154 7726 8343 10155 10156 10157 10158 10159 2078 5475 1009 10160 10161 10162 8526 10163 387 8371 1423 8293 10164 623 1964 8910 10165 1176 1174 10166 10167
95 5453 54 5284 10168 716 4888 10169 6502 10170 10171 9424 10172 10173 64 10174 121 6619 674 8103 10175 718 775 6639 167 5584 4936 723 727 1020 660 180 10176 10177 194 10178 687 2000 10179 10180 10181 10182 10183 10184 2093 10185 57 10186 2234 10187 10188 10189 10190 10191 1017 6658 7032 1237 2678 6100 10192 7022 10193 6064 131 10194 10195 2330 10196 203 8309 10197 9533 10198 7311 6375 10199 7313 10200 10201 9988 10202 10203 10204 1018 1437 445 2543 2102 2408 2424 10205 2449 7881 2341 780 2489 5286 5111 6767 10206 2407 10207 2496 2462 325 5070 10208 8148 5008 10209 10210 7328 10211 5555 2485 10212 10213 10214 1250 2469 1489 2722 10215 10216 10217 8057 10218 10219 10220 10221 1574 10222 10223 10224 3395 2726 4126 2626 10225 5459 10226 10227 10228 10229 2812 10230 10231 10232 1022 10233 7519 10002 989 2879 10234 10235 10236 10237 10238 5116 10239 10240 13 352 9413 10241 10242 10243 10244 1814 7446 364 10245 10246 10247 10248 10249 359 10250 9198 7417 3004 5713 10251 7379 1821 466 10252 10253 3032 1129 10254 10255 5097 5124 10256 10257 1024 10258 10259 10260 10261 10262 1833 1839 10263 3006 10264 10265 10266 10267 10268 10269 10270 1183 1049 2377 851 10271 10272 10273 3585 826 10274 7062 10275 10276 3127 8981 10277 3863 10278 10279 10280 10281 10282 10283 10284 10285 10286 10287 10288 8221 10289 10290 10291 10292 10293 10294 10295 1238 2096 10296 1256 10297 1866 10298 10024 10299 10300 10301 10302 10303 10304 10305 10306 10307 10308 10309 10025 10310 10311 10312 10313 10314 10315 8582 10316 10317 10318 10319 10320 10111 10321 10322 10323 10324 10325 10326 10327 10328 10329 10330 10331 10332 10333 10334 10335 10336 10337 10338 10339 10340 10341 10342 543 10343 10344 10345 10346 10347 10348 10349 10350 10351 10352 10353 5734 10354 10355 10356 10357 10358 10359 10360 10361 10362 10363 10086 10364 10365 10366 10367 10368 10369 10370 10371 10372 10373 10374 10375 930 10376 10377 10378 10379 929 10380 10381 10382 10383 10384 10385 10386 10387 10388 935 10389 10390 10391 10392 10393 10394 10395 10396 10397 10398 10399 10400 10401 10402 10403 10404
96 8495 10405 8104 10406 10407 10408 10409 9200 10410 34 10411 10412 10413 10414 10415 9164 10416 10417 10418 10419 10420 743 10421 10422 10423 7695 10424 1889 10425 10426 6577 8509 8708 6579 7803 10427 10428 7411 686 9424 6523 10429 4776 1422 10430 10431 5964 10432 5584 8532 10433 10434 9668 10174 10435 10436 10437 10438 6571 10439 10440 8112 387 464 10441 8120 4902 10442 10443 4903 10444 10445 1609 4904 10446 10447 6636 10448 10449 10450 4576 9351 746 10451 432 8323 10452 685 10453 10454 10455 8119 6975 10456 10457 7290 10458 10459 1428 2209 2314 7270 2119 10460 150 10461 10462 153 171 10463 6713 10464 10465 10466 10467 6043 6722 8497 10468 10469 10470 2373 10471 2309 10472 10473 10474 7424 10475 10476 10477 6773 10478 10479 10192 2992 466 10480 463 5734 10481 5141 10482 9223 5109 2969 4923 8165 10483 5759 10484 10266 10485 10486 10487 10488 10489 10490 8182 10491 10492 10493 10494 10495 4942 10496 10497 10498 9926 3121 480 428 5784 7050 10499 10500 10501 10502 10503 835 10504 8166 10505 8969 10506 10507 10508 10509 10510 10511 10512 3726 4445 7660 10513 10514 3425 10515 10516 7072 10517 845 10518 10519 10520 10521 10522 10523 10524 10525 10526 8208 10527 10528 10529 10530 10531 10532 4178 7675 519 10533 10534 10535 10536 10537 7639 7051 10538 10539 10540 10541 10542 8980 10543 10544 10545 10546 10547 3910 7083 10548 10549 4493 10550 10551 10552 10553 10554 10555 10556 10557 10558 1252 10559 10560 3149 10561 10562 10563 10564 10565 10566 10567 7679 10568 5876 10569 10570 10571 10572 10573 10574 10575 10576 10577 10040 10578 10579 688 10580 10581 10582 10583 10584 10585 9035 10586 10587 10588 10589 10590 1256 10591 6190 10592 10593 10594 10595 10596 10597 10598 10599 10600 10601 10602 10603 10604 10605 10606 10607 7098 5909 10608 483 10609 8601 8674 9679 9751 10610 9806 10611 10612 9903 10356 9943 10613 10614 10615 10616 10617 546 10618 10619 10620 10621 10622 919 10623 10624 10625 10626 10627 5917 10628 10377 10629 10630 6219 10631 5922 10632 10633 10634 10635 10636 10637 10638 10639 9781 10640 9836 10641 6265 9881 10642 10643 10384 3970 7847 10644 928 10645 10646 10647 10648 10649 10650 932 10651 10652 10653 10654 10655 10656 10657 10658 10659 10660 10661 10662 10663 10664 10665 10666 10667 10668 10669 10670 10671 10672 10673 10674 10675 10676 673 10677 10678 10679 10680 10681 10682 10683 10684 10685 10686
97 1006 10687 8322 10688 10689 8337 10690 10691 10692 10693 7167 7170 10694 10695 10696 4255 3812 10697 10698 10699 10700 8423 10701 10702 10703 10704 10705 10706 8315
98 10707 10708 10709 6341 10 8766 10710 582 8499 10711 10712 10713 10714 10715 6812 10716 5314 10148 4922 10001 10717 10718 10719 8527 10720 9183 10092 10721 10722 10723 3413 8536 1507 3663 848 10724 3527 10725 10726 10727 5814 7335 10728 4946 4011 10729 10730 10731 10732 4412 10733 10282 10734 10735 10736 10737 10738 10739 10740 10741 3829 10742 10743 1302 10744 10745 10746 4656
99 10747 10748 10749 10750 716 10751 10752 8470 10753 10754 1403 10755 10756 10757 1943 5356 5361 6654 6454 10758 10429 10759 10760 5502 10169 8076 10168 9318 10761 10762 10763 6806 3075 10764 4892 979 10765 5581 7997 5944 755 10766 10767 10768 5696 10174 742 10769 5480 10770 10771 1489 10772 5958 10773 10774 10 5487 10775 10776 4915 10777 8289 180 10778 1064 674 10779 10780 10781 6632 10782 1874 10006 10783 7147 10784 775 10785 5584 5490 5823 8103 10786 741 10787 726 7206 721 2407 1320 7879 5252 7390 6918 62 6909 164 978 10788 6517 10789 3089 10790 73 10791 10792 10793 10794 10795 10796 280 10797 11 10798 647 648 10799 61 10800 10801 2606 6805 10802 10803 4940 7198 10804 10805 10218 58 10806 77 10807 6126 643 6061 10808 232 10809 10810 10811 10812 10813 136 6830 10814 10815 10816 326 7442 10817 6934 2759 198 10818 354 1355 10819 3978 10820 10821 4323 10822 10823 10824 10825 6471 7975 10826 1924 10827 10828 9068 5615 44 7156 1919 1927 43 5614 10829 7192 5370 10830 551 2476 10831 7482 10832 10833 10834 7190 10835 1926 7146 388 8295 10836 10837 10838 10839 149 10840 1921 684 5505 1493 1870 8863 8826 10841 10842 10843 10844 10845 670 10846 10847 10848 7208 10849 10850 10851 8853 10852 10853 10854 8801 10855 10856 10857 10858 10859 1871 2439 21 1962 10860 10861 10862 10863 10864 691 10687 1364 6315 10865 10866 10867 10868 6921 10869 10870 1352 8288 10871 10872 10873 7230 10874 778 10875
100 10876 9042 10877 7529 10878 10879 10880 10881 10882 10883 10884 10885 10886 10887 10888 387 10889 10890 2374 10891 10892 359 818 10893 10894 10895 10896 10897 9231 10898 10899 10900 5833 10901 10902 10903 10904 10905 10906 10907 7957 10908 10909 10910 10911 10912 10913 10914 10915 10916 10917 10918 10919 10920 10921 10922
101 10923 1013 10455 167 10924 570 103 9327 83 2314 10925 4610 6349 635 17 1432 10926 10927 120 5654 652 639
102 8002 6748 7997 10928 5363 8078 10929 267 10930 10931 5590 7874 10932 1871 1069 10933 6505
103 10934 228 10935 10936 10937 7202 10938 1352 1351 12 7206 10939 683 659 6506 7539 10940 537 0 1384 10941 10831 10942 7221 440 969 10181 7540 22 10943 775 165 421 687 137 10944 670 215 10945 10946 49 10947 10948 3 672 10949 10950 1713 10951 10952 52 10953 7837 10954
104 10955 10956 10957 1086 8614 10958 10959 8371 10960 4804 10961 10962 10963 10964 10965 4867 10966 10967 10968 10969 10970 1352 10971 10972
105 7799 7794 10973 10974 5581 10975 10976 10977 10978 10979 10980 10981 10982 7826 10983 10984 10985
106 7799 6408 9977 10986 10987 10988 9973 6416 10989 10990 10991 10992 10993 10994 6418 6419 10995 10996 10997 6421 6601 7808 10998 10999 6671 11000 11001 11002 11003 11004 11005 11006 11007 11008 6443 11009
107 9027 9054 9030 4783 9082 11010 5630 8653 8601 8648 11011 9097 9370 8354 551 11012 11013 11014 10879 11015 8654 3107 11016 11017 4940 686 8670 7587 9562 8652 11018 11019 11020 11021 11022 11023 11024 8677 461 11025 11026 1031 6453 11027 11028 11029 11030 11031 11032 11033 11034 11035 11036 11037 11038 9818 11039 11040 11041 11042 2711 9847 11043 11044 9882 11045 11046 11047 11048 11049 826 5801 11050 7062 11051 11052 11053 11054 3058 843 11055 7705 11056 11057 3870 11058 11059 5828 11060 5850 11061 4004 11062 11063 849 11064 11065 11066 11067 11068 11069 11070 11071 11072 11073 11074 7066 11075 11076 11077 4383 11078 868 11079 11080 11081 11082 11083 875 10307 11084 11085 11086 11087 11088 11089 11090 11091 11092 11093 11094 11095 11096 11097 11098 11099 11100 11101 11102 10111 11103 11104 11105 1972 11106 11107 11108 11109 11110 10732 11111 11112 540 10344 11113 11114 11115 11116 11117 10076 11118 11119 11120 11121 11122 11123 11124 6188 11125 11126 1306 10596 4329 11127 11128 10669 11129 11130 11131 11132 10647 4877 11133 11134 11135 11136 11137 10137 11138 11139 11140 11141 11142 11143 11144 11145 11146 11147 11148 11149 11150 11151 11152 11153 11154 11155 11156 11157 11158 11159 11160 11161 11162 11163 11164 11165 11166 11167 11168 11169 11170 11171 11172 11173 11174 11175 11176 11177 11178 11179 11180 11181 11182 11183 11184 11185 11186 7951 11187 11188 11189 11190 11191 11192 11193 11194 11195 11196
108 5591 77 11197 6920 68 11198 1293 388 6451 11199 43 6623 102 11200 11201 118 66 64 684 106 17 10954 11202 11203 151 150 10462 153 12 93 74 4892 105 775 90 1104 1870 11204 11205 11206 6907 721 11207 11208
109 10973 7799 1952 11209 10848 11210 11211 1894 7796 11212 8075 11213 11214 7510 11215 11216 10988 11217 11218 11219 11220 10975 10985 10990 11221 11222 11223 10993 11224 11225 11226 11227 11228 11229 2012 11230 11231 11232 11233 2113 11234 11235 9993 11236 11237 11238 2431 11239 11240 11241 11242 11243 11244 11245 11246 11247 11248 11249 11250 11251 11252 350 3238 11253 11254 11255 11256 11257 364 11258 11259 11260 11261 11262 7823 8095 8094 11263 11264 11265 11266 7811 11267 1320 7818 11268 11269 11270 7826 11271 11272 11273 11274 11275 11276 5616 11277 11278 11279 11280 7819 11281 11282 11283 1072 7822 7821 7409 11284 7800 270 7815 7817 11285 7809 11286
110 11283 11287 7814 11288 11289 183 7812 11274 157 11290 11291 6424 11292 11282 11265 7819 7826 6412 11293 6438 6439 10982 6443 11294 11295
111 8434 11296 8879 5964 1792 9323 11297 718 5487 7732 11298 1658 1673 6460 8375 3670 1789 1756 11299 11300 11301 5497 11302 11303 11304 11305 11306 11307 9331 8489 11308 11309 11310 11311 11312 11313 1710 11314 11 11315 11316 5966 1502 11317 656
112 11318 11319 8952 11320 10722 6912 11321 11322 1183 5777 8963 11323 11324 11325 11326 11327
113 5475 716 7520 11328 7851 1178 718 4553 551 5345 1916 11329 10863 11330 11331 11332 7148 1933 11333 1875 726 5361 2412 7141 11334 11335 11336 7725 2003 8103 7142 5480 4565 1006 1009 10213 10212 11337 1928 11338 11339 2004 11340 4566 1412 8508 8483 1235 11341 11342 8478 8350 10150 1926 11343 11344 742 1493 11345 8477 11346 575 11347 11348 11349 7269 11350 11351 7167 11352 1995 7145 623 11353 11354 2133 7146 11355 7854 5511 9975 11356 2185 4938 9978 11357 11358 11359 8308 8302 8307 11360 2218 2314 11361 11362 8313 11363 11364 2277 11365 11366 11367 11368 2360 1431 7169 11369 10860 2317 11370 7858 11371 11372 11373 8900 2423 2267 11374 6058 11375 11376 11377 11378 11379 11380 2347 7173 11381 9395 2356 11382 11383 11384 2723 7165 11385 11386 11387 11388 10206 8910 5679 2485 5535 11389 11390 11391 5315 11392 1161 11393 11394 2641 11395 11396 9997 11397 11398 11399 2607 2814 11400 11401 11402 11403 9179 11404 11405 11406 2887 11407 2563 11408 11409 11410 1426 1973 11411 11412 11413 5518 11414 11415 2977 3012 11416 11417 8542 7178 11418 11419 11420 11421 2831 11422 3130 7183 11423 11424 11425 8965 11426 11427 11428 11429 1815 11430 3317 11431 11432 11433 11434 11435 11436 11437 11438 7363 11439 11440 11441 10268 11442 11443 11444 11445 1181 809 11446 11447 3522 11448 11449 11450 9193 11451 11452 7050 11453 11454 3455 11455 11456 11457 11458 11459 11460 11461 4696 11462 3684 1171 11463 11464 11465 11466 11467 3705 1190 11468 11469 11470 3687 11471 3703 3727 11472 11473 11474 3933 11475 11476 11477 11478 1204 11479 8584 11480 4030 11481 4262 11482 4195 11483 4243 4341 4452 3753 11484 11485 11486 11487 11488 4729 11489 11490 11491 11492 11493 11494 11495 11496 11497 11498 4434 11499 11500 11501 11502 11503 11504 11505 11506 4033 11507 11508 11509 2758 4702 11510 11511 11512 11513 886 11514 11515 11516 11517 11518 11519 11520 11521 11522 11523 11524 11525 11526 11527 11528 11529 11530 11531 11532 11533 11534 5293 11535 9302 11536 11537 11538 11539 11540 8269 11541 11542 3935 11543 11544 11545 11546 11547 11548 11549 11550 7904 11551 11552 11553 11554 11555 11556 11557 11558 9416 2187 11559 11560 11561 11562 2968 11563 11564 3756 11565 11566 11567 11568 11569 11570 11571 7380 11572 11573 11574 11575 11576 11577 11578 11579 11580 11581 11582 11583 10381 10596 11584 11585 10701 11586 11587 11588 11589 11590 11591 11132 11592 11593 11594 11595 11596 11597 11598 11599 11600 1723 11601 11602 11603 11604 11605 11606 6254 11607 11608 11609 11610 11611 11612 11613 7896 11614 11615 11616 11617 6261 11618 11619 11620 4358 11621 11622 11623 11624 11625
114 8384 1727 10055 11626 11627 8533 11628 660 3 5505 621 11629 11630 10463 11631 11632 10455 11633 554 10874 11634 6310 10414 11635 1156 9320 11636 8594 8526 11637 1080 8438 11638 8391 11639 1674 11640 11641 11642 11643 649 5432 1463 3353 11644 1787 5668 11645 11646 11647 1405 11648 11649 1087 11650 2072 187 1063 11651 1704 11652 11653 1731 11654 6314 11655 5506 7290 2119 7268 10451 11656 9354 11657 7294 7282 11658 11659 1321 1167 11660 11463 11661 7331 659 1428 623 11662 11663 1067 11664 1473 11665 8341 11666 7283 5950 5951 1459 11667 5953 11668 609 1694 5972 7731 11669 6012 2352 8886 8477 11670 7746 11671 11672 8451 11673 11674 11675 10474 11676 1160 1171 4622 5337 8867 1448 11677 10146 5247 11678 10198 11679 11680 1041 11681 6539 1452 8395 6375 10165 447 1012 8920 1173 11682 1133 11683 5997 1017 1434 11684 11685 11686 8914 5314 5539 11687 11688 7771 11689 6080 11690 11691 11692 1038 417 8721 11693 11694 11695 11696 8625 11697 11698 1158 7471 11699 7772 5631 8633 610 8426 1039 6121 5934 10443 9813 2083 11700 11701 9360 11702 11703 11704 11705 11706 11707 11708 11709 11710 11711 11712 11713 11714 11715 11716 11717 11718 11719 11720 11721 11722 11723 11724 8354 11725 11726 11727 11728 11729 8323 11730 11731 11732 11733 11734 483 1839 8601 5444 8674 11735 975 9806 11736 10611 11737 11738 11739 9903 11740 11741 11742 11743 608 8456 7789 11744 11745 11746 11747 11748 11749 11750 1890 613 11751 11752 7790 11753 4702 8939 11754 1112 9293 6376 3588 11755 11756 820 11757 4853 5201 1847 8368 835 11758 3617 9465 9943 11759 11760 1618 11761 10727 11762 11763 11764 11765 5199 1140 11766 11767 11768 851 11769 11770 11481 6016 3718 11771 1743 373 114 1204 6152 11772 11773 13 11774 3031 11775 1474 10945 7642 11776 10518 666 695 6386 11777 1641 1381 11778 9385 9341 11464 9364 696 11779 1115 9375 700 10409 11780 11781 8320
115 7190 8854 11782 8626 11783 7243 11218 11784 463 6349 4922 5949 11785 11786 11787 5111 10254 6395 5735 794 11788 11789 9220 5759 3396 11790 11259 11791 11448 6147 3468 11792 11793 3450 1834 11794 11795 11796 11797 11798 5793 11799 11800 9237 11801 11802 11803 11804 6206 11805 11806 11807 11808 6232 11809 6236 6263 11810 11811 11812 11813 11814 11815 10379 6177 11816 11817 5814 11818 9236 3738 11819 11820 11821 11822 11823 11824 11825 11826 11827 11828 11829 11830 11831 11832 11833 11834 11835 11836 11837 11838 11839 11171 11840 11841 11842 11843 11844 11845 11846 11847 11848 11849 11850 11851 11852 11853 11854 11855 11856 11857 11858 11859 11860 11861 11862 7935 11863 11864 11865 11866 11867 11868 11869 11870 11871 11872 8099 11873 1380 11874 621
116 11875 11876 11877 5958 5111 6318 716 5202 11878 6810 11879 6286 10759 1365 11880 1743 5487 11881 975 11882 11883 11884 417 8005 11777 11885 11886 11887 5700 11888 11889 11890 11891 11892 391 7475 1443 5654 6386 3164 3670 1924 11893 11894 11895 11896 11897 11898 1459 1457 1665 11899 2996 1707 9360 710 712 7642 695 5201 11900 11901 11902 11903 11904 11905 11906 11907 11908 11909 11910 11911 7471 6796 11912 11278 6544 1584 8328 11913 8339 11914 11915 11916 11917 11918 8320 1671 8896 6569 8325 1989 11919 438 11920 11921 681 5220 2725 6566 9341 9385 9364 11779 9375 6352 11922 6297 11923 8512 1445 11924 11925 11926 11927 694 7432 11928 11929 11930 11931 4956 167 11932 4838 8330 6525 2045 11933 11934 11935 114 373 13 8341 8591 11936 11937 11938 11939 11940 11318 11941 6571 11942 11943 11944 11945 11946 11947 11948 11949 11950 11951 6971 6959 8732 11952 982 1767 11319 2234 11953 11954 11955 11956 11957 11958 11959 732 11960 11961 9593 8639 8636 9620 11962 11963 11964 2205 11965 10160 11966 2204 2126 11967 11968 11969 11970 164 2333 5529 11971 2112 746 2379 11024 5182 11972 11973 11974 4803 4826 11975 11976 6348 11977 11978 11979 2122 4921 4970 2222 11980 6048 387 2374 11981 6285 4808 945 11982 4336 5044 11983 11984 4337 4455 399 400 705 11985 170 3038 1431 11037 2269 11986 11987 10198 445 11988 11989 11990 11991 2464 11992 5315 7322 11993 743 11994 11995 2616 2381 2223 779
117 5631 11996 11997 1104 11998 11999 12000 12001 12002 12003 12004 4838 12005 2088 12006 4821 12007 2419 12008 12009 8228 12010 12011 12012 12013 12014 12015 8224 2123 12016 5764
118 12017 12018 2102 12019 4990 1234 2311 12020 12021 1191 12022 1 527 12023 12024 12025 12026 5453 5507 12027
119 12028 12029 12030 5361 12031 4892 12032 12033 180 6984 1663 12034 12035 6358 7834 12036 1973 5958 12037 12038 12039 6341 11339 8282 10435 10874 4925 5477 12040 12041 12042 12043 12044 10161 11411 4922 11026 12045 2137 12046 12047 684 12048 12049 732 12050 12051 12052 6805 12053 12054 12055 12056 2249 12057 6083 12058 9374 4994 12059 4912 7839 12060 12061 12062 12063 10183 12064 8298 12065 12066 12067 6742 1419 12068 7248 8520 12069 12070 447 10711 7328 7041 12071 12072 7260 12073 6355 10789 12074 12075 12076 12077 12078 12079 2739 2405 9174 3797 12080 6082 12081 1003 12082 2733 11971 12083 10752 12084 12085 12086 5081 10718 7351 10736 12087 12088 11424 12089 12090 12091 12092 12093 3115 5114 12094 7343 5147 10581 12095 8958 10721 12096 12097 3512 12098 3539 12099 12100 6480 3527 12101 12102 12103 7063 557 3669 12104 12105 10731 12106 12107 12108 4092 4706 12109 12110 4857 4263 5243 3562 4288 12111 12112 12113 12114 8316 12115 5258 4451 12116 5295
120 7826 7820 7819 11274 6439 1894 7800 10977 10975 10995 7827 8099 10811 11218 6433 12117 6428 12118 1320 8097 6443 11009 12119 12120 12121 10747 12122 12123 7828 11214 12124 10982 11212 12125 12126 12127 12128 721 8469 10987 12129 149 7794 8075 11294 7515 12130 6304 12131 10986 7200 6412 10988 6417 7802 11224 10989 10990 12132 12133 1386 12134 6056 9173 967 12135 10071 7806 12136 12137 8077 12138 12139 7796 12140 12141 7795 12142 11231 12143 12144 11293 7818 11276 11275
121 12145 12146 5352 8442 1009 4559 1020 4564 8879 7139 12147 10156 5496 12148 7260 623 12149 7282 8293 11306 4622 2388 5546 11673 12150 8910 12151 5314 5286 2248 2779 6374 1003 7760 2765
122 8427 12152 5943 5967 12153 9580 6302 12154 5983 4778 1793 11911 12155 12156 12157 673 6548 1639 10409 5985 12158
123 1620 520 12159 1691 12160 12161 12162 7497 6444 5439 1459 1740 12163 1382 12164 1648 84 5337 12165 1753 1486 12166 1484 376 1809 12167 645 7476 12168 12169 4956 527 11296 1771 1332 1644 12170 1674 12171 3670 1634
124 12 7539 5449 12172 7003 7028 12173 22 12174 150 166 12175 9596 12176 6415 1603 6582 12177 138 9654 8066 387 12178 12179 12180 6708 9690 1031 225 7879 12181 12182 12183 220 12184 12185 5087 12186 9864 12187 9847 9909 6120 6885 12188 6890 12189 12190 12191 12192 12193 12194 12195 1252 12196 12197 12198 12199 12200 12201 12202 5599 12203 12204 12205 394 12206 6955 7563 12207 12208
125 12209 12210 12211 12212 12213 7842 12214 718 8794 12215 12216 10863 7190 12217 12218 10173 12219 2219 12220 7519 1965 12221 5502 6445 12222 12223 12224 12225 12226 5297 1958 1907 9331 12227 2026 10774 1178 120 12228 2185 7269 12229 7747 12230 12231 2084 2153 2400 12232 12076 11349 5292 12233 12234 12235 12236 12237 4614 7159 12238 2205 12239 7301 12240 12241 12242 447 12243 5316 12244 2371 4637 197 2293 12245 11370 12246 11369 12247 2423 11385 11383 12248 12249 5332 5535 7164 12250 11390 12251 7329 12252 2706 10247 2893
126 12253 8508 11361 8910 8933 1166 7782 9529 3387 3498 3683 3921 12254 12255 4714 3489 12256 12257 12258 11609 12259 12260 12261
127 1120 12262 5643 5645 1686 570 1076 180 12263 12264 12265 4956 12266 12267 2457 12268 81 12269 6076 5419 12270 12271 2749 12272 12273 5482 1352 1427 12274 7995 9317 367 12275 1796 12276 7647 12277 5471 12278 12279 11637 1738 725 8430 7196 968 120 12280 1948 107 693 8065 103 11305 8090 5933 1648 8323 5484 12281 12282 12283 12284 12285 12286 6462 315 12287 6943 12288 12289 12290 6932 9336 12291 1426 1806 1914 12292 1054 444 12293 7471
128 11208 12294 12295 643 124 29 8710 149 12296 5601 12297 7002 12298 228 5237 71 8705 4892 12299 12300 12301 159 7185 684 7406 6576 975 9163 22 12302 154 153 4893 166 172 12303 6042 186 9510 64 4936 12304 12305 12306 1069 5401 54 7797 12307 2413 775 12177 12308 12309 12310 12311 1006 972 970 12312 606 1010 165 12037 12313 679 10462 7502 9551 12314 12315 6505 12316 1427 175 5581 191 4923 12317 220 12318 12319 12320 12321 85 677 188 58 967 6856 7200 12322 12323 7500 5612 7984 12324 6506 86 12325 60 1402 12326 52 12327 8619 16 12328 409 14 12329 12330 21 119 113 8104 194 226 12029 41
129 7021 6666 105 5339 6594 10628 5369 12331 8005 5471 564 723 12332 12333 12334 12335 6513 4923 6582 251 1492 5404 5584 12336 12337 6568 5433 4894 5406 9510 12168 778 12338 5182 7233 7853 7501 1565 6624 628 90 4939 8058 238 6602 8105 572 12339 2080 8492 12340 12341 4945 12342 5498 6637 8115 5370 9422 12343 8016 6620 6641 4951 171 4938 6644 10184 8066 12344 286 168 4968 2095 9628 9130 6757 1573 12345 12346 6631 4977 6708 209 335 6714 9615 6724 9650 432 6673 5001 12347 12348 12349 5014 6899 6710 6753 9758 5015 6769 3097 6564 6754 6783 12350 325 6763 5036 6767 6735 6760 6789 12351 995 310 5041 8150 2773 12352 5043 4323 12353 5368 2602 6777 6786 8151 9817 2606 8733 6788 6902 5232 10540 12354 12355 12356 12357 12358 12359 12360 6890 12361 12362 12363 12364 12365 6883 12366 12367 12368 12369 12370 12371 12372 3389 7919 12373 12374 12375 12376 12377 6599 402 12378 5762 6610 12153 12379 12380 12381 12382 12383 153 12384 12385 12386 12387 6615 12388 12389 12390 12391 12295 12392 12393 150 5600 16 12394 1350 1559 12395 1546 12396 12397 12398 12399 656 12400 650 12401 6664 12402 1607 709 154 12403 12404 12405 1592 396 12406 6292 12407 12408 8818 12409 12410 12411 12412 12413 6694 12414 6581 12415 12416 6604 6921 12417 12418 5599 166 12419 409 5596 12420 12421
130 117 54 12422 12423 5582 12424 12425 12426 8646 12427 1937 5947 105 12428 12429 725 12430 12431 5596 6764 11 8629 742 9099 12432 90 12433 12434 12030 237 12435 10448 441 2373 12436 120 8590 8110 8640 12437 150 8825 100 9306 12438 8588 8493 5360 12439 8729 1930 8657 2331 12440 12441 2283 12442 8790 2374 12243 12443 12444 5033 7550 12445 5029 12446 2434 10797 11685 12447 12448 147 12449 5560 12450 7044 299 8795 2519 12451 12452 12453 6888 12454 12455 12456 12457 31 12329 648 10850 49 374 12458 10838 721 12459 12460 12461 12462 7853 12463 12464 12465 10429 6906 12466 5643 1924 38
131 8 12467 12398 180 103 5590 971 79 12468 12469 10932 7192 12470 12471 22 150 12472 12473 4940 679 175 108 195 5628 8106 138 12474 85 12475 125 44 75 105 10867 21
132 5851 12276 12476 8887 12477 8774 390 1899 5926 1686 12478 7293 12479 670 12480 215 12481 6913 114 1685 12482
133 11302 12124 7505 1786 12483 3670 10973 11215 11941 12484 8838 103 5455 5463 1251 5328 12485 12486 7223 7478 183 12118 691 12487 1211 975 116 12488 1011 12489 12490 1740 5466 270 10982 5436 12491 659 5966 1459 1789 11 12492 596 12493 969
134 12494 12495 12496 5475 5472 10755 12497 6802 11783 12498 12499 12500 12501 12502 12503 551 11297 6984 12504 12505 12506
135 7221 12507 4944 1399 12508 7300 12509 9437 12510 12511 2487 12512 3053 12513 2388 6785 12514 2612 12515 12516 11474 1024 12517 8863 1140 12518 10817 2513 7772 2620 12519 12520 10218 12521 10793 2836 12522 12523 12524 12525 2831 2812 2572 12526 12527 12528 4685 2757 8554 12529 12530 3043 12531 12532 12533 12534 12535 2903 2495 1022 12536 5117 12537 2940 9197 12538 12539 9413 6114 12184 12540 8852 12541 12542 12543 12544 12545 136 12546 12547 1814 12548 12089 12549 12550 1821 4667 9195 658 2644 2485 12551 7160 787 12552 12553 5111 5555 12554 12555 12556 2814 12557 1049 789 12558 7442 12559 12560 12561 12562 12563 1973 3346 4682 1845 12564 3128 12215 12565 12566 11347 8958 11398 3224 12567 12568 11372 9221 12569 12570 12571 11439 12572 12573 12574 9194 10050 12575 11434 3101 12576 12577 12578 2800 12579 12580 12581 12582 12583 12584 3684 3688 12585 12586 12587
136 1678 160 12588 103 10935 1063 14 8925 12300 12589 8619 660 1349 6506 8622 1899 8836 12590 775 167 12591 7780 7196 12592 90 12593 1428 32 211 12298 7492 657 171 12594 12595 7417 12596 11208 5648 12597 1232 12598 12599 10505 12600 12601 12602 1141 12603 5315 12604 12605 12606 12607 816 10496 12608 12609 12610 12611 6895 12612 12613 12614 12615 12616 12617 12618
137 12619 12620 1011 12621 1097 12622 12623 12624 12625 12626 12627 1664 12628 2097 6147 12629 3365 12630 12631 7049 12632 12633 12634 9244 12635 12636 12637 5247 3164 2017 12638 11086 12639 12640 12641 12642 12643 2141 12644 12645 12646 12647 12648 12649 9243 12650 12651 12652
138 12653 12654 12655 12656 6823 12657 12658 10247 463 11414 7375 5728 5716 1823 5124 5735 12659 8177 12660 12661 8961 12662 12663 3463 12664 3370 12665 12666 12667 3121 12668 8181 3592 12669 12670 1973 12671 12672 9236 10101 5790 8207 7465 11794 10507 12673 11051 12674 12675 12676 12677 5814 7067 12501 12678 12679 12680 12681 12682 12683 11478 12684 12685 4014 12686 12687 12688 12689 12690 12691 8212 12692 5857 12693 12694 12695 12696 12697 10540 11493 12698 4302 12699 12700 12701 12702 12703 5257 12704 12705 12706 12707 11080 12708 5864 7884 7712 12709 12710 12711 11500 12712 12713 12714 12715 12716 12717 12718 11096 12719 12720 12721 12722 12723 12724 12725 12726 12727 7090 12728 12729 3669 12730 12731 12732 12043 12733 12734 12735 12736 12737 12738 6202 12739 12740 12741 12742 6204 12743 12744
139 12745 6310 12058 774 12746 12747 12748 6891 3621 12749 1840 12750 12751 8457 12752 12753
140 12754 12755 12756 12757 7257 12758 12759 12760 12761 12762 12763 7227 12764 12765 12766 6466 12767 12768 1976 12769 4600 5512 12770 12771 12772 12773 5286
141 650 4936 5471 1224 12774 12775 6030 12776 635 12777 4626 5748 10483 12778 12779 5755 8960 12780 7047 12781 8961 3127 12782 10724 11799 12783 12784 11793 12785 12786 12787 12788 12789 12790 12791 12674 1294 12792 12793 12794 12795 7705 12796 12797 10515 6897 12798 12799 12800 12801 12802 12803 12804 12805 3513 4347 12806 12807 12808 8968 12809 12810 12811 8221 12812 6155 12702 12813 12814 12815 12816 12817 12818 12819 12820 12821 11593 12822 12823 12824 5650 12825 12826 12726 12827 12828 10334 10331 12829 12830 12831 12832 12833 6201 12834 6194 12835 12836 12837 12838 12839 12840 12841 12842 12843 12844 12845 11809 12846 12847 6262 12848 12849 10679 12850 12851 11830
142 5837 9163 5339 672 739 12202 12852 5838 6859 141 103 12853 8278 12854 5840 7225 1384 628 4902 8361 4903 12855 4904 12856 8059 8367 727 6582 167 12857 1075 12858 551 4893 1889 12859 5839 12860 90 12861 4922 8378 12862 775 12863 175 31 8380 5709 1796 1352 11037 12592 12864 136 379 6602 12865 7390 572 4797 7403 424 8110 1997 8115 5987 8065 12866 8859 6637 12867 4938 8066 7196 694 725 387 1428 38 170 171 12868 12869 8887 12870 8870 2022 64 12871 4598 2162 12872 10519 10455 12873 9638 9351 1954 12874 679 1031 12875 6932 12876 2182 12877 6462 12878 12879 12880 6708 483 12184 4982 12881 11361 12882 12883 2268 432 4610 12884 995 240 8601 6719 12885 1207 12886 12887 12888 2246 12889 12890 220 6930 618 12891 4997 1109 8263 12892 12893 8674 6789 12509 12894 4998 8130 12895 1017 12896 8493 2441 8917 12897 10791 10804 8507 16 12898 9534 12899 9679 1237 5015 7300 203 444 2374 12900 12901 8516 8517 5546 6899 10190 12902 5102 4639 9782 4634 6085 9751 12903 8141 9589 12448 1018 12904 2420 8790 1125 6077 8138 8524 5648 2407 8140 12905 12906 8082 12907 12908 12909 6763 12910 5622 1146 9730 8150 10214 6767 12911 12912 1131 12913 12914 1579 279 12915 8530 8795 12916 12917 5042 12918 5225 9432 12919 312 12920 12921 9806 12922 12395 8577 6785 12923 44 325 12924 12925 5604 635 12926 5684 2613 8157 12927 280 6830 8163 12928 6902 473 1140 6787 12929 1138 319 2671 5605 12930 2832 2853 1388 10229 7898 2779 6399 5097 8538 9775 688 12931 10611 12399 12932 12933 2751 13 12934 854 9413 5108 5087 9448 6792 6124 2923 1814 1250 12935 79 12936 12937 474 10246 12938 12939 12940 3323 8173 4887 3166 12941 12942 6088 364 6871 6872 8819 1823 12943 8951 8255 2632 7024 4839 12944 12547 8051 3229 7465 5713 5003 6889 12295 8545 6781 12945 12946 12947 12948 3207 8958 3237 12949 9903 3177 9209 5745 12950 12951 10559 12952 12953 12954 8084 12955 496 12956 3127 9913 12957 12958 10483 5109 12959 12783 6883 12960 6887 7058 12961 10555 4659 5784 1294 12962 9223 6885 5791 5799 1252 12963 12799 8490 12964 12794 8194 12965 8873 7055 10511 9943 11796 12966 6897 8574 12967 12968 8970 2982 3740 890 12969 3918 3252 12970 4942 5184 7705 12971 3708 12808 12972 12973 12805 5625 4012 12371 3823 12974 7711 12975 8193 12976 12977 6478 4271 7054 8210 12978 12979 10549 8421 8221 12807 12980 12981 12982 10543 12983 12984 1360 12985 12986 12811 4502 10509 2490 12987 12988 12989 5204 4088 6155 1279 894 12990 10295 8088 12991 12804 9471 5255 12992 1866 12993 3006 12994 12995 12996 12997 10566 12998 12999 13000 13001 13002 13003 13004 5650 13005 1238 4968 12820 8231 9473 1539 8268 13006 2354 13007 13008 12356 2105 13009 13010 8237 8409 13011 1835 13012 13013 1550 10328 6171 13014 13015 6174 7468 3513 6190 13016 13017 12813 13018 13019 13020 13021 13022 545 1337 13023 13024 11532 13025 6890 13026 1331 2665 13027 13028 13029 10362 13030 13031 13032 13033 9477 13034 13035 9490 6213 13036 13037 8269 13038 13039 13040 13041 7906 7891 12839 13042 13043 13044 13045 13046 13047 10384 13048 10290 6245 13049 10587 6246 13050 10612 3583 13051 13052 13053 12841 8354 13054 13055 13056
143 673 2410 1104 13057 8258 7243 395 13058 13059 1496 13060 1872 1787 13061 9327 8301 8420 13062 13063 13064 13065 11881 13066 1444 3 5326 13067 4806 8261 6549 6550 2688 13068 9324 12485 11744 13069 13070 13071 1801 9593 7287 4776 4990 13072 5505 2077 6929 8537 13073 686 1793 9397 8377 4938 13074 7196 8390 13075 9381 13076 725 7167 1803 5985 6533 13077 13078 9348 9312 6379 13079 8861 1031 4 9620 8352 8355 8362 13080 13081 1016 5017 4795 13082 2240 12897 13083 13084 8354 5313 240 1578 13085 13086 6933 13087 2268 11338 13088 2427 4610 9702 12867 171 13089 6027 2313 13090 13091 13092 7362 6407 13093 13094 2560 1838 13095 7630 4621 13096 13097 2455 13098 1367 6329 13099 13100 6328 8353 13101 13102 10259 13103 13104 890 3185 13105 12661 13106 2838 5753 13107 11448 9227 3340 13108 3427 13109 13110 3433 13111 13112 3127 13113 12783 3468 13114 13115 9951 4815 12784 9926 10274 1840 11457 5792 3613 12799 504 13116 5801 11506 13117 13118 13119 13120 9961 6399 3871 7705 4716 6196 13121 3870 4719 13122 13123 13124 72 12805 13125 13126 4135 13127 12696 4145 11062 13128 13129 13130 13131 13132 13133 10518 13134 13135 4362 12809 13136 13137 4291 13138 13139 867 13140 7084 4439 13141 13142 10560 4411 13143 13144 4498 5866 10282 13145 13146 13147 10567 13148 13149 6197 13150 6826 9271 10056 5241 13151 13152 13153 13154 11569 13155 6191 13156 13157 13158 12728 13159 11546 13160 6190 6182 10596 9303 13161 13162 13163 6202 13164
144 9560 54 5351 13165 13166 9566 13167 13168 13169 9025 13170 13171 13172 9080 13173 103 9079 11206 13174 13175 10178 9565 71 13176 13177 10472 4783 13178 13179 13180 5349 5354 2131 1886 8652 13181 13182 8588 13183 8636 13184 9026 5658 5631 6770 7645 1892 5350 7604 13185 9567 9563 13186 4791 13187 5359 13188 12317 4792 13189 10626 6572 13190 13191 5578 7799 9106 13192 5638 9027 269 4897 13193 13194 13195 13196 244 6703 439 13197 8650 12331 6748 9501 7646 13198 6323 9088 13199 13200 1896 7996 13201 13202 8596 5581 13203 7606 9082 13204 7605 9424 13205 13206 10171 5634 13207 9031 8102 13208 9085 13209 13210 13211 13212 7541 13213 986 13214 13215 13080 13216 13217 13218 1917 1922 7240 6729 6563 4777 13219 7647 13220 13221 13222 6565 13223 7195 12856 9569 13224 13225 10438 13226 5498 6619 13227 10928 13228 11010 8063 13229 7608 13230 1955 13231 9573 13232 13233 7677 13234 13235 7029 8645 13236 13237 13238 6633 13239 13240 569 13241 5584 13242 4556 13243 4796 13244 13245 1495 8600 10993 13246 8605 13247 9582 7416 4907 6586 8648 13248 13249 723 9092 686 9094 13250 8604 7649 5364 13251 8653 12332 5630 7611 7533 13252 13253 13254 13255 6504 13256 13257 13258 7414 13259 13260 8601 6999 9576 1972 13261 560 13262 13263 1974 6673 13264 7610 13265 13266 9578 6749 344 7387 13267 6582 13268 12313 13269 12337 9577 10959 13270 13271 1966 9103 9585 4923 13272 9575 7251 8756 8064 2413 13273 13274 9506 6861 9033 11011 6574 9097 6640 9592 13275 13276 13277 6567 9580 6568 8109 4563 6418 13278 6516 11014 13279 13280 13281 9035 13282 13283 8016 13284 2001 1980 9587 1987 13285 13286 8018 6571 565 13287 9100 13288 13289 7010 13290 9104 13291 4913 10485 9579 127 13292 13293 614 13294 9102 8107 13295 6513 32 13296 90 13297 12474 5983 13298 13299 1989 293 6699 6564 11012 13300 6870 13301 9589 5990 13302 13303 13304 13305 7023 13306 13307 6629 13308 13309 13310 9593 6591 13311 13312 13313 13314 13315 2000 9426 9105 109 7400 13316 9108 13317 13318 13319 13320 13321 7575 8613 13322 13323 13324 6862 13325 8048 13326 13327 9118 6573 9107 9109 8642 13328 13329 13330 6584 13331 13332 2035 13333 9591 13334 8343 13335 8620 13336 11228 13337 267 13338 13339 8258 13340 9974 5776 9110 13341 13342 13343 6644 13344 6550 136 8767 13345 13346 6420 5500 7612 13347 2024 11015 13348 9590 13070 13349 8647 13350 13351 8654 13352 13353 8644 13354 13355 6519 5840 13356 6283 13357 6583 13358 10988 13359 13360 13361 13362 112 13363 13364 9112 10930 9598 6624 13365 9595 13366 13367 9599 11232 4799 3107 13368 13369 13370 13371 13372 13373 13374 185 13375 9116 8042 13376 13377 421 2054 13378 13379 7650 8111 13380 4939 92 13381 8649 9600 9119 8651 13382 8764 13383 4801 13384 13385 6602 572 13386 13387 13388 12176 83 10995 8661 1588 13389 13390 13391 9532 13392 13393 9601 120 1945 13394 13395 13396 158 13397 9115 13398 13399 2036 13400 13401 13402 13403 8058 9596 5628 13404 8658 9653 13405 8282 4933 7517 6601 2067 11016 13406 2030 13407 9511 2061 13408 4930 13409 6718 7615 13410 13411 98 13412 13413 13414 6607 13415 13416 13417 13418 1573 13419 2040 4932 13420 6621 13421 13422 8382 13423 13424 6771 11939 13425 13426 13427 13428 12865 13429 8762 101 13430 8114 13431 9121 13432 11970 13433 13434 13435 13436 13437 13076 13438 7543 7256 13439 6691 9604 2074 9125 13440 13441 9892 206 13442 10887 13443 4806 13444 7780 13445 13446 13447 13448 13449 4902 13450 13451 6652 13452 7618 13453 13454 9122 13455 12339 8765 13456 6293 13457 13458 13459 13460 9603 13461 13462 7564 13463 147 8668 7616 8665 10888 13464 2071 13465 8067 7218 13466 6656 6674 4941 13467 6630 6659 1803 2050 1602 13468 12347 13469 13470 13471 9624 6675 13472 13473 9038 13474 13475 9626 11017 13476 13477 13478 13479 13480 13481 13482 13483 13484 13485 13486 8496 13487 13488 6651 2080 6027 2070 13489 13490 13491 13492 13493 13494 13495 13496 13497 2079 5820 13498 6620 7271 9668 7617 4937 13499 13500 425 9605 9615 13501 13502 13503 13504 13505 9610 13506 13507 13508 8066 9348 13509 9607 8670 7587 2090 9137 13510 13511 9622 13512 13513 13514 7589 9619 13515 2093 13516 9654 13517 8673 13518 13519 13520 353 9606 13521 12342 6637 13069 13522 6021 13523 12231 9613 13524 13525 13526 8674 11935 11937 6688 13527 583 13528 13529 2088 13530 4945 13531 142 2066 13532 13533 13534 13535 5639 13536 13537 13538 13539 6631 13540 13541 8117 13542 13543 13544 9609 13545 9126 13546 13547 6634 13548 13549 13550 13551 13552 13553 9676 13554 5635 13555 13556 13557 13558 13559 13560 9611 13561 13562 13563 13564 8666 11226 13565 12048 2098 13566 9128 13567 6010 2112 9617 13568 9608 13569 13570 6001 7619 7588 13571 10475 8760 13572 13573 13574 13575 8810 13576 13577 13578 13579 13580 13581 13582 170 13583 6733 13584 6638 13585 13586 13587 13588 12910 11018 135 13589 13590 13591 13592 13593 13594 13595 12872 1944 12868 179 9614 8870 9621 13596 13597 9616 13598 4952 13599 10889 8777 13600 10496 7620 9129 7679 13601 11949 13602 6636 13603 9132 12871 12873 13604 13605 7621 13606 6641 13607 13608 356 10547 9127 13609 13610 13611 13612 13613 13614 13615 13616 13617 13618 4950 4903 13619 328 13620 13621 13622 9130 286 13623 13624 13625 13626 5715 6024 13627 13628 13629 13630 13631 13632 13633 13634 13635 13636 13637 9640 9135 13638 8782 13639 7665 13640 13641 2130 229 13642 13643 9964 13644 8679 13645 7662 9633 9139 140 13646 13647 6648 8371 9628 13648 13649 8690 6655 13650 13651 10890 13652 13653 2160 4805 13654 13655 9623 5683 8122 13656 2155 13657 7622 519 13658 13659 13660 13661 13662 13663 13664 13665 9648 9133 13666 5339 13667 11958 11019 13668 2400 13669 13670 9634 13671 13672 13673 13674 9646 13675 13676 13677 9134 9136 13678 13679 13680 6023 13681 9734 2153 13090 164 1954 13682 9637 9641 13683 13684 9650 8676 13685 13686 8121 13687 9631 13688 13689 13690 8396 9629 13691 9639 13692 5547 13693 13694 13695 146 4963 13696 13697 9643 13698 13699 5495 13700 13701 2144 13702 13703 6658 7631 13704 13705 13706 3067 7424 13707 13708 6653 13709 13710 6209 13711 10473 13712 13713 13714 4966 12232 13715 13716 13717 13718 13719 9886 13720 13721 13722 13723 9690 13724 13725 13726 11981 13727 11972 13728 13729 13730 13731 9655 13732 12875 512 11020 8551 9644 11001 13733 13734 13735 13736 13737 13738 11021 13739 12877 13740 7623 13741 13742 9647 13743 13744 13745 13746 13747 13748 9649 13749 13750 13751 6671 13752 8502 9664 13753 7625 13754 990 13755 13756 13757 13758 13759 13760 13761 13762 13763 9142 11022 6686 8793 13764 4921 4909 13765 2166 13766 13767 13768 13769 13770 2095 13771 4968 13772 13773 13774 13775 13776 13777 13778 5517 13779 8124 13780 13781 13782 13783 13784 13785 13786 13787 13788 13789 13790 13791 13792 13793 13794 13795 13796 11023 7656 13797 13798 11231 8390 13799 13800 13801 168 13802 13803 1507 6727 13804 13805 12878 12179 13806 13807 13808 13809 9660 13810 13811 13812 13813 13814 13815 13816 13817 8125 9677 9662 13818 13819 6683 13820 13821 13822 13823 13824 13825 9140 9141 13826 13827 13828 13829 13830 8677 13831 6701 243 13832 13833 2176 13834 13835 13081 13836 4976 13837 13838 13839 5292 13840 7660 4971 13841 13842 13843 223 12183 176 13844 2210 9663 13845 13846 7630 13847 13848 13849 13850 13851 13852 13853 13854 11025 9667 13855 13856 13857 13858 7859 6706 13859 499 13860 2313 13861 446 13862 13863 4973 9527 461 6178 6743 266 9520 9671 13864 9430 13865 13866 13867 6150 6037 13868 4974 6704 8786 13869 13870 5516 6687 13871 6717 428 13872 6705 13873 333 13874 13875 13876 13877 9672 13878 470 13879 13880 13881 13882 13883 8681 13884 13885 6700 8505 13886 13887 9669 13888 13889 203 9665 13890 13891 13892 13893 4810 9683 13894 13895 13896 13897 13898 9143 13899 13900 13901 13902 13903 11002 2197 13904 6744 9666 13905 13906 10809 13907 13908 9431 6342 8682 13909 13910 13911 7879 13912 13913 13914 13915 13916 13917 13918 13919 13920 13921 9673 6709 4977 13922 13923 13924 13925 13926 13927 13928 13929 13930 13931 13932 13933 13934 11968 11977 13935 13936 2198 8680 13937 7844 13938 13939 12237 9679 13940 9920 9681 13941 259 9674 8427 6719 6710 1994 13942 13943 2207 13944 13945 13946 13947 6707 13948 13949 13950 13951 4988 8813 13952 193 13953 13954 13955 8808 13956 2224 13957 13958 13959 13960 13961 9693 13962 13963 13964 9675 13965 192 9680 6712 13966 9686 13967 9678 13968 13969 13970 13971 13972 13973 8684 13974 6038 13975 13976 13977 9689 6716 13978 9698 13979 13980 9691 13981 4983 13982 13983 13984 13985 335 13986 13987 6714 4992 12883 13988 13989 13990 13991 6750 13992 9701 9792 13993 13994 8791 13995 9685 13996 2268 9730 13997 9709 13998 9694 13999 14000 14001 14002 4804 14003 9695 6715 14004 8127 4982 298 9145 14005 14006 14007 6738 14008 4812 14009 14010 4813 201 9697 9522 14011 14012 14013 14014 10553 14015 14016 14017 14018 14019 995 14020 9704 8790 14021 14022 14023 14024 14025 14026 14027 9703 12508 6721 4987 9702 6096 14028 14029 14030 6723 14031 14032 14033 14034 14035 14036 14037 14038 14039 14040 2243 14041 14042 6726 14043 14044 14045 14046 14047 14048 14049 14050 14051 14052 14053 3134 14054 469 14055 8379 9699 14056 14057 14058 9714 14059 14060 6382 6045 14061 9700 14062 14063 11980 10469 14064 9715 6724 14065 14066 2235 14067 14068 14069 14070 14071 14072 14073 14074 14075 14076 14077 14078 14079 14080 14081 14082 14083 14084 14085 281 14086 14087 14088 14089 5723 14090 14091 14092 14093 14094 14095 14096 14097 6054 14098 6725 14099 14100 14101 14102 14103 8688 14104 8139 14105 8686 14106 14107 14108 9721 14109 14110 14111 8687 14112 14113 9724 9705 14114 433 14115 14116 14117 2226 6930 14118 9728 9725 2246 14119 14120 457 9766 14121 14122 6777 14123 14124 14125 14126 14127 14128 9708 14129 14130 14131 14132 14133 14134 14135 14136 217 14137 14138 9441 14139 14140 14141 14142 14143 14144 14145 14146 9827 14147 14148 14149 11027 14150 8685 14151 14152 14153 14154 14155 11979 14156 14157 361 14158 9722 14159 14160 14161 8326 11987 9716 6754 14162 14163 9735 14164 9796 14165 14166 14167 14168 14169 9707 14170 9719 14171 14172 9720 14173 14174 14175 14176 14177 14178 14179 14180 14181 14182 14183 14184 14185 14186 13099 14187 14188 14189 14190 8325 231 9746 14191 14192 14193 14194 2260 14195 3374 6735 14196 14197 14198 14199 14200 9738 14201 14202 9726 6351 14203 14204 14205 14206 14207 9780 14208 235 14209 14210 14211 14212 14213 14214 14215 14216 14217 14218 14219 14220 14221 14222 14223 2283 14224 14225 6734 9732 6736 14226 14227 14228 14229 6072 3234 14230 358 14231 14232 14233 14234 6345 14235 234 14236 14237 14238 6740 14239 14240 14241 4814 14242 5001 14243 14244 14245 9718 2282 14246 14247 14248 14249 14250 14251 14252 5824 14253 14254 11029 14255 9526 14256 14257 14258 14259 14260 14261 14262 14263 14264 14265 8511 14266 14267 14268 14269 6035 7876 11976 14270 14271 11005 14272 2223 9729 14273 14274 12184 14275 12899 12181 14276 14277 14278 9723 14279 14280 14281 14282 1838 14283 6052 14284 14285 14286 14287 9761 14288 247 14289 14290 14291 14292 11030 14293 14294 14295 14296 14297 14298 14299 14300 14301 14302 14303 8129 9791 5007 14304 14305 14306 14307 14308 14309 14310 14311 14312 14313 14314 14315 14316 8130 14317 14318 14319 14320 14321 7654 14322 14323 14324 2468 14325 14326 14327 14328 2326 14329 14330 14331 357 14332 11031 14333 261 14334 12597 14335 14336 9710 6775 14337 14338 6067 14339 14340 14341 14342 8132 14343 9745 14344 14345 14346 14347 11978 14348 9204 14349 4817 14350 14351 14352 14353 14354 14355 14356 14357 252 14358 12448 5002 12353 14359 14360 9736 14361 14362 14363 14364 6047 14365 14366 14367 14368 14369 14370 14371 14372 14373 263 14374 14375 14376 14377 14378 14379 14380 14381 14382 14383 14384 9744 9771 14385 14386 14387 9750 14388 14389 14390 14391 14392 6778 14393 8081 14394 254 7031 8903 6348 14395 14396 9742 14397 14398 14399 14400 258 14401 14402 14403 9755 14404 14405 14406 456 10219 14407 14408 14409 14410 14411 9756 9461 14412 14413 5014 14414 14415 14416 14417 14418 14419 7583 9739 14420 9752 14421 14422 14423 14424 14425 14426 14427 14428 14429 14430 9751 14431 14432 14433 14434 14435 14436 14437 14438 14439 2323 14440 9376 6753 6899 14441 14442 14443 14444 14445 14446 14447 14448 14449 8809 14450 9765 6751 5015 14451 14452 2346 14453 14454 14455 14456 14457 14458 448 8692 2956 14459 14460 1583 14461 14462 14463 14464 14465 14466 14467 8135 14468 14469 14470 14471 9772 14472 9749 8693 14473 14474 296 14475 14476 14477 14478 14479 268 14480 14481 6931 14482 14483 14484 14485 273 450 14486 4818 14487 14488 2348 2303 9760 14489 2345 6761 444 14490 14491 12914 14492 14493 14494 6048 4637 14495 271 14496 14497 14498 5024 14499 14500 14501 14502 11033 14503 14504 14505 9764 14506 272 14507 4828 14508 14509 14510 6769 9757 14511 5020 14512 14513 14514 14515 5037 14516 9784 285 14517 14518 14519 14520 283 11034 14521 14522 14523 14524 14525 14526 9391 14527 14528 14529 14530 11924 6782 468 14531 14532 7559 14533 14534 14535 2344 2357 2358 14536 14537 14538 2359 14539 14540 14541 14542 14543 9759 9773 14544 5019 14545 14546 14547 5102 2366 13094 9768 7550 14548 12517 14549 11035 14550 14551 9767 6766 14552 2567 12904 14553 14554 14555 7880 14556 14557 14558 14559 14560 14561 14562 2381 14563 14564 14565 14566 14567 14568 442 14569 11036 9762 14570 7657 14571 14572 14573 14574 14575 14576 9936 14577 14578 14579 14580 14581 6071 14582 14583 14584 8137 2402 14585 14586 6783 14587 14588 14589 14590 14591 14592 8138 14593 460 14594 14595 14596 6068 14597 9774 14598 14599 14600 449 14601 14602 14603 219 14604 11874 5029 14605 14606 14607 14608 14609 14610 14611 14612 14613 14614 9770 14615 2042 14616 14617 14618 14619 8141 14620 14621 4821 14622 14623 14624 14625 9775 14626 2508 14627 14628 14629 14630 14631 14632 14633 14634 14635 14636 14637 2710 14638 14639 9786 12350 14640 9778 14641 7138 14642 14643 5092 14644 14645 14646 8142 14647 14648 14649 9777 14650 12440 14651 14652 9458 9785 9781 9779 14653 14654 14655 14656 14657 9783 14658 14659 445 14660 14661 4822 11239 14662 14663 14664 2456 14665 508 14666 14667 14668 7433 14669 14670 6383 14671 14672 14673 14674 14675 14676 14677 14678 290 14679 14680 14681 14682 14683 14684 14685 14686 14687 14688 14689 14690 14691 14692 14693 14694 5027 6070 287 12516 14695 2395 14696 14697 14698 14699 9535 14700 14701 14702 14703 5030 14704 14705 2716 14706 14707 9793 9439 14708 14709 14710 14711 14712 5028 5009 1131 14713 14714 14715 5036 7576 14716 14717 6881 14718 7661 8522 14719 14720 14721 14722 14723 14724 14725 14726 14727 14728 14729 14730 14731 14732 14733 9776 8783 14734 14735 14736 14737 8795 14738 14739 14740 14741 14742 14743 8667 14744 14745 14746 14747 5031 14748 14749 14750 14751 14752 14753 14754 14755 8145 14756 14757 9540 14758 14759 5640 14760 9861 11038 14761 14762 14763 14764 14765 7614 6774 14766 14767 5365 14768 14769 14770 14771 14772 11925 8144 14773 14774 14775 14776 14777 14778 14779 14780 14781 14782 9789 14783 14784 14785 295 14786 14787 327 14788 14789 9805 14790 301 14791 14792 14793 14794 14795 14796 14797 14798 14799 14800 14801 14802 12916 8147 6791 9797 2734 5051 14803 14804 14805 14806 14807 6790 14808 9795 14809 14810 14811 14812 14813 14814 14815 14816 5560 14817 14818 14819 14820 14821 7664 14822 14823 14824 14825 297 14826 14827 2561 14828 454 14829 14830 6768 14831 14832 14833 14834 14835 2958 14836 14837 7663 14838 14839 14840 14841 14842 14843 10209 14844 14845 2545 14846 14847 9433 14848 14849 14850 14851 509 11991 14852 14853 9798 14854 14855 9800 14856 14857 6789 14858 14859 14860 3103 14861 14862 7044 14863 14864 7570 14865 14866 2959 14867 8151 14868 14869 14870 14871 14872 7547 14873 304 9804 14874 14875 8525 14876 14877 14878 12185 12927 14879 14880 14881 14882 9552 14883 14884 14885 14886 14887 8188 14888 9922 14889 7987 302 300 14890 14891 14892 14893 6929 7439 14894 14895 14896 455 14897 14898 14899 14900 2509 14901 12009 309 14902 14903 8225 8694 9536 14904 14905 14906 14907 2528 14908 14909 5225 14910 14911 14912 10819 11992 5039 14913 14914 14915 14916 14917 14918 14919 9815 14920 14921 14922 14923 14924 453 9822 9853 633 7557 6548 14925 14926 14927 14928 14929 14930 14931 14932 14933 9801 14934 14935 14936 14937 495 14938 14939 14940 2481 4833 14941 306 305 14942 9917 2494 14943 14944 14945 14946 14947 2520 14948 14949 14950 14951 14952 14953 14954 14955 14956 14957 14958 14959 14960 14961 9803 14962 14963 6126 14964 3036 308 14965 255 14966 14967 14968 14969 14970 14971 14972 14973 14974 14975 14976 14977 9807 7673 14978 14979 14980 14981 14982 10664 14983 8152 5041 14984 5562 14985 14986 2475 14987 3089 14988 14989 14990 14991 8412 14992 14993 14994 14995 14996 14997 14998 9806 14999 15000 15001 15002 9823 15003 9396 15004 15005 15006 9819 15007 15008 8157 15009 11245 8924 15010 15011 9818 15012 15013 9440 15014 5315 15015 15016 9821 8154 310 15017 15018 8179 9432 15019 15020 2403 8393 15021 8153 15022 12352 15023 8815 15024 15025 7435 15026 15027 15028 15029 15030 15031 15032 15033 15034 2472 6141 15035 15036 15037 9810 15038 6148 15039 8155 6779 15040 5043 2602 15041 1217 9437 15042 312 6090 15043 2504 15044 2575 471 15045 15046 15047 15048 15049 15050 249 15051 15052 15053 15054 15055 15056 15057 15058 5047 2747 9537 15059 15060 11250 15061 15062 9829 15063 15064 15065 9434 15066 15067 15068 9415 280 15069 5048 15070 9817 15071 314 15072 15073 15074 15075 15076 15077 15078 15079 15080 6108 15081 5050 15082 15083 15084 2608 15085 15086 9813 3170 15087 15088 15089 15090 15091 15092 15093 15094 15095 15096 15097 15098 15099 12749 15100 15101 2639 15102 15103 8160 15104 15105 15106 317 15107 12010 15108 15109 15110 15111 15112 15113 15114 15115 15116 15117 15118 15119 12925 15120 15121 15122 2598 9828 15123 5054 15124 15125 15126 9934 15127 15128 15129 15130 6785 5049 15131 15132 15133 15134 5052 15135 15136 8804 15137 15138 15139 15140 2640 15141 2794 9927 15142 15143 15144 12514 15145 6093 15146 15147 15148 15149 15150 9831 15151 15152 15153 15154 15155 15156 15157 15158 15159 15160 15161 15162 7043 15163 15164 15165 15166 15167 15168 9820 15169 15170 15171 15172 15173 15174 15175 15176 15177 15178 15179 15180 15181 2768 15182 15183 15184 15185 9824 15186 15187 15188 5058 8159 15189 10218 15190 3061 15191 7581 15192 15193 15194 15195 15196 318 15197 9809 9442 9834 15198 15199 15200 15201 9846 15202 15203 15204 320 15205 15206 15207 15208 15209 15210 15211 15212 15213 15214 2632 15215 15216 330 15217 15218 15219 15220 15221 15222 2703 15223 15224 15225 15226 15227 15228 15229 15230 15231 15232 15233 15234 15235 2636 15236 15237 15238 15239 15240 15241 15242 15243 15244 15245 15246 15247 15248 15249 15250 8162 15251 15252 15253 15254 8161 15255 15256 15257 15258 15259 12189 532 15260 15261 2691 15262 9825 2647 15263 15264 2564 11995 6788 15265 15266 15267 15268 9835 9844 1810 15269 15270 15271 15272 15273 15274 15275 9838 11039 15276 1811 8414 1140 15277 15278 15279 15280 15281 15282 15283 5254 15284 15285 15286 329 9833 15287 15288 15289 15290 15291 15292 6377 15293 15294 7709 15295 2680 15296 15297 9843 9836 15298 15299 15300 9841 15301 15302 15303 15304 15305 12192 15306 15307 15308 15309 332 15310 15311 15312 1024 15313 10646 10648 15314 4544 15315 15316 15317 6902 15318 9832 15319 2701 15320 15321 15322 15323 15324 15325 15326 15327 2729 15328 15329 2788 15330 6086 15331 15332 15333 15334 9167 6787 15335 15336 15337 15338 15339 15340 15341 15342 15343 15344 15345 15346 15347 7710 15348 15349 15350 15351 15352 15353 15354 15355 15356 15357 15358 15359 15360 15361 15362 15363 7566 15364 15365 15366 15367 15368 15369 15370 15371 7584 5062 15372 15373 15374 15375 15376 15377 15378 15379 15380 15381 15382 15383 15384 15385 15386 15387 15388 15389 15390 15391 15392 5073 1816 15393 15394 15395 9848 15396 2648 15397 4836 15398 15399 15400 15401 9857 15402 15403 15404 15405 2745 15406 15407 15408 2726 15409 15410 7670 5797 15411 15412 15413 2927 15414 15415 15416 15417 15418 15419 15420 15421 3456 15422 15423 15424 15425 15426 2767 15427 15428 15429 6891 15430 11042 12449 15431 15432 15433 15434 15435 2774 2759 15436 6934 15437 7676 15438 15439 15440 15441 15442 15443 15444 15445 15446 15447 15448 15449 9862 15450 15451 2818 15452 2809 15453 15454 15455 15456 2783 15457 15458 15459 10963 2804 15460 15461 15462 2825 2832 15463 15464 15465 9850 15466 15467 15468 15469 15470 15471 15472 15473 15474 15475 15476 15477 15478 15479 15480 15481 15482 15483 9854 15484 15485 15486 9851 15487 15488 15489 15490 15491 15492 15493 15494 9852 15495 15496 15497 9884 15498 15499 15500 15501 15502 15503 7668 15504 15505 15506 15507 15508 15509 15510 15511 6384 15512 15513 459 15514 15515 15516 15517 15518 15519 15520 2939 523 8228 10253 15521 12960 15522 15523 15524 458 9847 15525 15526 9449 15527 15528 15529 15530 15531 15532 15533 336 15534 15535 2460 9435 10482 2849 15536 15537 15538 15539 15540 15541 15542 15543 15544 15545 15546 15547 15548 15549 15550 15551 15552 15553 15554 5097 15555 3229 15556 15557 10665 15558 15559 15560 4837 15561 15562 15563 15564 15565 15566 15567 15568 7556 15569 15570 15571 15572 15573 15574 15575 15576 15577 12610 9926 15578 15579 5718 8535 15580 15581 15582 7441 8543 15583 15584 15585 515 2833 15586 15587 15588 15589 15590 15591 15592 15593 15594 15595 10229 15596 15597 2845 15598 15599 15600 15601 9858 15602 15603 15604 15605 15606 15607 15608 15609 15610 15611 15612 15613 15614 15615 2837 15616 15617 7669 15618 15619 15620 15621 15622 15623 15624 15625 15626 15627 15628 15629 9867 15630 15631 11043 15632 15633 15634 15635 15636 15637 15638 15639 15640 15641 15642 15643 15644 15645 15646 15647 15648 15649 9870 2819 15650 15651 15652 15653 15654 15655 15656 15657 15658 15659 15660 15661 15662 15663 8224 15664 535 15665 15666 9859 15667 15668 4839 340 9438 2881 15669 15670 15671 15672 8392 15673 2827 15674 2820 7586 15675 15676 15677 15678 15679 15680 5072 3102 15681 343 15682 6088 15683 15684 15685 9855 15686 15687 342 15688 15689 15690 15691 15692 15693 15694 15695 5077 15696 15697 15698 5076 15699 15700 9871 15701 15702 15703 15704 15705 15706 15707 15708 15709 15710 15711 15712 12512 9897 5108 15713 15714 15715 15716 15717 15718 15719 15720 15721 15722 15723 10611 15724 15725 15726 15727 15728 346 15729 15730 15731 15732 15733 15734 2883 6385 15735 15736 15737 10238 11044 15738 2469 15739 15740 15741 15742 15743 15744 3176 2888 15745 15746 15747 15748 2953 12934 15749 6291 15750 15751 15752 6199 15753 5079 15754 15755 2892 15756 15757 15758 15759 15760 2878 15761 15762 15763 15764 15765 5087 15766 15767 15768 15769 15770 15771 2879 15772 5100 15773 9542 15774 9539 15775 15776 15777 15778 15779 15780 15781 15782 15783 15784 15785 15786 12541 15787 15788 15789 15790 15791 15792 7064 475 15793 15794 15795 15796 15797 15798 15799 13123 15800 15801 15802 15803 15804 15805 15806 5086 15807 15808 15809 15810 9538 15811 15812 15813 15814 3372 10234 15815 15816 15817 15818 15819 15820 15821 15822 2983 15823 15824 15825 15826 15827 9866 15828 15829 15830 9865 15831 15832 15833 15834 15835 15836 15837 2955 15838 15839 15840 15841 15842 15843 15844 15845 15846 15847 15848 15849 370 15850 4853 15851 15852 15853 15854 15855 15856 15857 15858 15859 15860 6935 15861 363 15862 15863 15864 15865 9446 15866 6112 15867 15868 15869 10718 15870 490 15871 5089 15872 15873 15874 15875 15876 15877 15878 15879 15880 15881 15882 15883 9864 15884 8817 369 15885 15886 15887 15888 15889 15890 15891 15892 15893 15894 15895 15896 15897 2952 15898 15899 15900 2954 15901 10488 15902 15903 15904 15905 15906 15907 15908 15909 15910 15911 15912 15913 12993 15914 3211 5084 15915 15916 3025 15917 15918 15919 15920 2961 15921 15922 15923 15924 15925 15926 15927 15928 15929 15930 15931 15932 15933 15934 15935 15936 15937 15938 15939 2913 15940 15941 10505 15942 15943 9872 9869 15944 15945 15946 15947 15948 15949 15950 15951 541 15952 15953 15954 15955 4841 15956 15957 692 15958 15959 15960 15961 15962 15963 15964 15965 15966 15967 15968 15969 15970 15971 15972 15973 15974 9878 15975 15976 10243 15977 15978 15979 15980 15981 15982 15983 15984 15985 15986 15987 15988 15989 15990 15991 15992 15993 15994 15995 2988 15996 8170 3244 15997 15998 15999 16000 16001 6043 16002 16003 16004 10891 7585 16005 16006 16007 16008 16009 16010 16011 2984 16012 5798 16013 16014 3467 16015 16016 16017 16018 16019 16020 16021 16022 16023 16024 16025 16026 16027 12945 16028 16029 16030 3068 16031 16032 2985 8946 9445 16033 16034 16035 16036 9879 16037 16038 16039 16040 16041 16042 16043 16044 9873 16045 16046 16047 4851 16048 16049 16050 6388 16051 16052 16053 16054 16055 16056 16057 16058 9447 9192 16059 3003 16060 16061 5109 16062 16063 16064 16065 16066 4842 16067 1536 16068 16069 16070 9476 16071 16072 16073 16074 16075 16076 16077 16078 16079 8171 3268 365 16080 10645 16081 6142 16082 11046 3006 3007 16083 16084 4840 1609 16085 16086 16087 16088 16089 16090 16091 16092 10659 12959 16093 16094 7629 16095 16096 16097 16098 16099 16100 3084 16101 16102 16103 16104 16105 16106 16107 16108 16109 16110 16111 16112 16113 16114 3212 16115 9875 16116 16117 16118 16119 16120 16121 16122 16123 16124 16125 16126 16127 16128 16129 16130 3034 16131 3302 9883 16132 3287 9880 16133 7717 16134 16135 16136 3011 16137 3104 16138 8824 16139 8405 9443 16140 16141 16142 16143 16144 16145 16146 16147 16148 16149 16150 8229 16151 16152 16153 16154 16155 16156 16157 16158 16159 16160 9911 16161 16162 16163 16164 16165 16166 9891 16167 16168 16169 16170 16171 16172 16173 16174 9887 16175 8401 9889 5170 16176 16177 16178 16179 16180 16181 16182 16183 16184 16185 16186 16187 16188 16189 16190 5111 3074 3076 16191 16192 16193 16194 16195 16196 16197 16198 16199 16200 16201 16202 16203 16204 16205 16206 16207 10584 16208 16209 16210 16211 16212 16213 16214 16215 16216 9906 16217 3099 8819 16218 16219 16220 16221 16222 10586 16223 16224 16225 16226 16227 485 16228 16229 16230 16231 16232 16233 16234 16235 16236 16237 16238 16239 16240 16241 16242 16243 9905 3055 16244 16245 16246 3117 3202 9894 16247 16248 16249 16250 7577 16251 16252 16253 11207 8173 9902 16254 16255 16256 16257 16258 16259 16260 16261 505 16262 16263 9914 16264 16265 16266 16267 16268 16269 16270 16271 16272 16273 16274 16275 16276 3238 1510 16277 16278 16279 16280 16281 16282 16283 16284 16285 16286 3118 16287 16288 10533 16289 16290 16291 16292 7573 16293 11253 16294 16295 16296 16297 16298 16299 16300 16301 16302 16303 16304 16305 16306 16307 12704 16308 16309 6938 16310 16311 3105 16312 16313 5098 16314 16315 12944 16316 16317 16318 16319 16320 16321 16322 11045 16323 16324 16325 16326 16327 16328 16329 16330 16331 16332 16333 8553 16334 3181 3154 16335 3242 16336 16337 16338 16339 16340 16341 16342 16343 16344 16345 7667 16346 16347 16348 16349 11256 16350 16351 16352 16353 16354 16355 11254 16356 5716 16357 16358 16359 16360 16361 16362 16363 16364 3092 16365 16366 16367 16368 16369 16370 16371 16372 9899 16373 16374 16375 16376 16377 16378 16379 5177 16380 3233 16381 16382 5122 16383 16384 16385 16386 16387 16388 16389 16390 16391 16392 16393 16394 9912 5118 5119 3309 16395 16396 16397 9896 16398 16399 16400 16401 16402 16403 16404 16405 338 3236 9956 16406 3119 16407 16408 16409 16410 16411 3276 5366 16412 16413 16414 16415 16416 16417 16418 16419 16420 16421 16422 16423 16424 482 16425 3271 3203 16426 16427 16428 16429 16430 16431 16432 16433 3273 16434 16435 16436 16437 16438 16439 16440 16441 16442 16443 16444 10493 16445 16446 5121 16447 16448 16449 16450 16451 16452 16453 16454 16455 9895 16456 16457 16458 16459 16460 16461 16462 16463 16464 11255 16465 16466 16467 16468 16469 16470 16471 16472 16473 9893 16474 16475 16476 16477 3282 4855 16478 16479 16480 16481 16482 16483 16484 16485 16486 3232 3283 16487 16488 16489 16490 16491 16492 16493 16494 16495 16496 16497 16498 16499 3695 16500 16501 6876 16502 16503 2269 3230 16504 16505 16506 16507 16508 16509 16510 16511 16512 16513 16514 16515 16516 10491 484 16517 16518 16519 16520 8174 16521 16522 16523 16524 16525 16526 16527 16528 16529 16530 16531 9898 16532 16533 16534 9931 16535 6889 16536 3131 16537 16538 16539 16540 16541 16542 16543 16544 6888 9547 16545 16546 3174 16547 16548 473 16549 16550 16551 3322 16552 16553 474 16554 16555 16556 16557 5123 472 16558 16559 16560 16561 16562 16563 16564 16565 16566 9904 3243 16567 7053 16568 16569 16570 16571 16572 8547 16573 12947 16574 5130 16575 16576 16577 16578 16579 6939 16580 16581 3696 16582 6170 16583 16584 16585 16586 16587 16588 496 16589 16590 16591 16592 16593 16594 16595 16596 16597 16598 16599 16600 9903 16601 16602 16603 16604 16605 16606 16607 16608 16609 16610 16611 16612 16613 16614 16615 16616 16617 5135 16618 16619 16620 16621 3132 16622 16623 16624 9915 16625 16626 16627 3141 16628 16629 16630 16631 16632 16633 16634 1827 16635 16636 16637 16638 16639 16640 16641 16642 16643 5129 16644 16645 16646 16647 16648 16649 16650 16651 16652 3122 16653 16654 16655 16656 16657 16658 16659 16660 16661 16662 16663 16664 16665 16666 16667 9919 16668 16669 16670 16671 16672 16673 16674 16675 16676 16677 9451 16678 16679 16680 16681 4058 9930 16682 16683 16684 16685 16686 16687 3210 16688 16689 16690 9909 16691 16692 16693 16694 16695 8175 16696 16697 16698 16699 16700 16701 16702 16703 16704 16705 16706 7069 16707 3163 16708 3269 3177 16709 8958 16710 16711 16712 16713 16714 16715 16716 3209 16717 16718 3275 16719 16720 16721 16722 16723 16724 6401 16725 16726 16727 16728 16729 16730 16731 16732 16733 9550 16734 16735 16736 9548 16737 16738 16739 16740 16741 16742 16743 16744 16745 16746 16747 16748 16749 16750 497 16751 7671 16752 3360 16753 16754 16755 16756 16757 16758 16759 16760 16761 8871 16762 6941 9916 3454 16763 16764 16765 16766 16767 3237 16768 16769 16770 16771 16772 16773 3218 16774 16775 6154 3306 16776 16777 11904 16778 3016 16779 5136 4845 16780 9457 16781 16782 5137 16783 16784 16785 16786 16787 6149 3286 16788 16789 16790 16791 16792 16793 5138 16794 16795 16796 16797 16798 16799 16800 16801 16802 16803 16804 16805 16806 16807 16808 16809 16810 16811 16812 16813 16814 6893 16815 16816 16817 16818 16819 16820 16821 16822 10723 16823 16824 6139 16825 8177 8865 16826 16827 16828 16829 8182 16830 16831 16832 9450 13103 16833 16834 10666 16835 16836 16837 16838 16839 16840 16841 16842 16843 542 16844 16845 16846 8176 16847 16848 16849 16850 11320 16851 16852 16853 16854 16855 16856 3304 16857 16858 16859 16860 16861 3279 16862 16863 16864 16865 16866 16867 16868 10506 16869 3891 10486 16870 16871 16872 16873 16874 16875 16876 16877 16878 16879 3567 16880 16881 16882 16883 16884 16885 16886 16887 16888 9219 6217 3392 16889 9910 16890 16891 16892 9913 16893 16894 16895 16896 16897 16898 16899 16900 16901 16902 16903 16904 16905 16906 16907 16908 1832 3226 16909 5753 16910 16911 16912 16913 16914 16915 16916 16917 16918 16919 16920 16921 16922 16923 16924 16925 16926 3318 16927 16928 16929 16930 16931 16932 16933 8178 16934 16935 16936 4852 16937 16938 16939 16940 16941 16942 16943 16944 16945 16946 16947 16948 16949 16950 16951 16952 16953 16954 16955 16956 16957 3192 16958 1843 1252 16959 9223 16960 16961 16962 16963 16964 16965 9946 4847 16966 6402 16967 16968 16969 16970 16971 16972 16973 16974 16975 16976 16977 16978 16979 16980 16981 6885 16982 10650 16983 16984 16985 16986 16987 16988 16989 3349 16990 16991 5194 16992 16993 16994 16995 16996 5752 12779 16997 16998 16999 17000 5755 17001 17002 17003 17004 17005 17006 17007 17008 17009 17010 7675 17011 17012 17013 17014 17015 17016 17017 17018 17019 4846 17020 17021 17022 17023 17024 17025 17026 17027 17028 17029 3531 17030 17031 7047 9918 17032 6832 17033 12663 17034 17035 17036 17037 17038 17039 17040 17041 17042 17043 17044 17045 17046 17047 4816 17048 17049 17050 17051 17052 17053 17054 17055 17056 17057 17058 17059 17060 17061 17062 17063 17064 6890 17065 9454 17066 17067 17068 17069 17070 17071 17072 17073 17074 17075 17076 17077 17078 17079 17080 17081 17082 17083 17084 17085 7453 17086 17087 17088 3394 17089 17090 17091 17092 17093 17094 17095 17096 17097 17098 3435 17099 17100 9960 17101 17102 3494 17103 17104 17105 17106 8184 3388 17107 17108 3436 17109 17110 17111 17112 17113 8569 9933 17114 9958 17115 17116 17117 17118 17119 17120 17121 17122 17123 17124 17125 17126 17127 17128 17129 17130 17131 17132 17133 3690 3437 4848 17134 17135 17136 4127 8563 5114 10051 17137 17138 17139 17140 17141 9925 17142 17143 17144 17145 17146 17147 17148 17149 17150 17151 17152 17153 17154 17155 17156 17157 17158 17159 17160 10534 17161 17162 17163 17164 17165 486 17166 17167 17168 10876 17169 17170 3272 17171 5155 17172 17173 17174 17175 3415 17176 17177 17178 3416 17179 17180 8233 17181 17182 3473 17183 3420 3410 2861 17184 481 17185 9940 3634 17186 17187 17188 17189 17190 9951 17191 5777 12782 17192 17193 17194 17195 17196 17197 17198 17199 17200 3450 11799 17201 17202 17203 3468 17204 6879 8181 17205 17206 17207 17208 17209 17210 17211 17212 17213 17214 9929 17215 17216 3649 17217 17218 17219 17220 6739 17221 17222 17223 17224 11048 17225 17226 17227 17228 3536 17229 17230 17231 17232 17233 17234 17235 17236 17237 17238 17239 17240 17241 3457 17242 17243 17244 17245 9949 17246 17247 17248 17249 17250 17251 17252 17253 17254 17255 9231 17256 3630 17257 17258 9965 17259 17260 17261 17262 17263 17264 17265 17266 12961 17267 12611 17268 12671 9955 17269 17270 17271 17272 17273 17274 17275 17276 17277 3453 17278 17279 17280 17281 10899 17282 17283 17284 17285 17286 17287 17288 17289 5765 17290 5625 7118 17291 17292 17293 17294 17295 480 17296 9959 17297 9953 17298 17299 17300 17301 5790 17302 17303 17304 17305 17306 17307 17308 17309 17310 17311 3574 17312 17313 17314 17315 17316 17317 17318 7674 17319 17320 528 17321 17322 17323 17324 3270 17325 17326 17327 10535 17328 17329 17330 17331 17332 3595 17333 17334 9954 11047 5802 17335 17336 3583 17337 17338 17339 17340 17341 17342 3543 5157 17343 17344 17345 8637 3504 17346 1294 17347 17348 17349 17350 17351 9462 8189 5164 17352 7455 17353 17354 17355 17356 17357 17358 17359 17360 17361 17362 17363 17364 17365 3526 3538 6940 17366 17367 17368 17369 17370 17371 17372 17373 17374 9463 17375 17376 17377 3577 17378 17379 17380 6228 9464 10545 5793 12705 17381 17382 3542 17383 8085 17384 17385 17386 17387 17388 17389 17390 17391 17392 17393 17394 3593 17395 17396 3578 17397 17398 3594 17399 17400 17401 17402 17403 17404 17405 17406 8207 17407 17408 5794 17409 17410 8318 17411 17412 17413 17414 17415 17416 17417 17418 17419 3646 17420 17421 17422 17423 17424 17425 17426 17427 17428 17429 8185 17430 17431 17432 12672 17433 17434 17435 17436 17437 17438 17439 17440 17441 17442 17443 17444 17445 7059 12708 17446 17447 10598 17448 17449 17450 3537 9950 17451 17452 17453 17454 17455 17456 17457 17458 17459 17460 17461 17462 17463 17464 17465 17466 17467 17468 17469 17470 3773 3748 17471 6878 17472 17473 9942 17474 17475 17476 17477 10499 17478 17479 17480 5149 17481 3511 17482 17483 17484 17485 17486 17487 17488 9939 17489 17490 17491 17492 17493 17494 17495 9941 3592 17496 17497 17498 17499 3672 17500 17501 17502 17503 17504 17505 17506 17507 17508 3575 3576 17509 17510 17511 17512 17513 17514 3580 5161 17515 17516 17517 17518 17519 17520 17521 17522 17523 17524 17525 17526 17527 17528 3490 17529 10502 17530 9938 17531 17532 17533 521 3510 17534 17535 17536 17537 17538 17539 17540 17541 17542 8969 17543 17544 17545 17546 17547 17548 17549 17550 17551 17552 17553 17554 17555 17556 17557 17558 17559 17560 17561 17562 17563 5799 3689 17564 3685 17565 852 3133 17566 17567 17568 17569 17570 17571 17572 17573 17574 5791 17575 17576 17577 17578 17579 9555 17580 17581 17582 17583 17584 17585 17586 17587 17588 17589 17590 17591 17592 17593 17594 17595 17596 10550 17597 17598 17599 17600 17601 17602 17603 8970 17604 17605 17606 17607 17608 538 17609 17610 17611 17612 17613 17614 17615 17616 9943 3768 17617 17618 12674 17619 11794 5166 8190 17620 17621 9553 17622 17623 17624 17625 507 17626 3645 17627 17628 3766 3633 17629 11054 17630 17631 17632 17633 3865 17634 17635 17636 2478 17637 3627 17638 17639 17640 17641 6894 17642 17643 17644 7061 17645 17646 17647 17648 12673 17649 17650 17651 1835 17652 17653 3641 8191 17654 17655 17656 17657 17658 3825 17659 17660 17661 17662 17663 17664 17665 3749 17666 17667 17668 17669 17670 5205 17671 3740 6196 17672 17673 17674 17675 17676 17677 17678 17679 17680 17681 17682 17683 17684 17685 17686 17687 17688 17689 17690 17691 17692 17693 17694 17695 17696 17697 17698 17699 492 17700 3681 17701 17702 17703 17704 17705 3682 17706 3820 17707 17708 17709 8194 3688 17710 17711 17712 17713 17714 17715 3700 17716 17717 17718 17719 17720 17721 17722 17723 3615 17724 17725 17726 17727 17728 17729 17730 17731 17732 5801 17733 17734 17735 17736 17737 17738 17739 17740 17741 17742 17743 17744 6883 17745 17746 17747 17748 3742 3701 5168 3674 17749 17750 17751 17752 17753 11798 10510 17754 3813 17755 17756 17757 17758 17759 17760 17761 6689 17762 17763 17764 17765 17766 6892 17767 17768 17769 17770 17771 501 17772 17773 17774 4445 17775 17776 17777 17778 17779 17780 17781 17782 17783 17784 17785 9466 17786 17787 17788 11069 17789 17790 17791 17792 17793 17794 17795 17796 17797 17798 17799 17800 17801 17802 17803 17804 3751 17805 17806 17807 17808 10508 17809 17810 17811 3745 9961 17812 5844 17813 17814 9962 17815 17816 17817 17818 17819 17820 17821 17822 17823 17824 3631 17825 17826 17827 17828 17829 17830 17831 3762 17832 17833 17834 17835 17836 17837 17838 3743 17839 3784 6900 17840 17841 17842 17843 17844 17845 17846 3808 12677 8203 17847 17848 5814 3741 17849 17850 3792 3736 3871 3671 17851 10629 9249 5171 17852 17853 17854 17855 17856 17857 5174 17858 12586 17859 12794 4854 9967 17860 17861 17862 17863 17864 17865 17866 17867 17868 9963 3738 17869 17870 17871 17872 17873 17874 17875 17876 17877 17878 17879 17880 17881 17882 17883 17884 17885 17886 17887 17888 17889 17890 4003 17891 3668 17892 17893 17894 17895 17896 8197 17897 3765 17898 17899 17900 17901 9948 3877 17902 17903 17904 17905 17906 17907 3763 17908 17909 3764 3819 17910 8201 3815 17911 17912 17913 17914 17915 17916 3806 17917 3556 17918 17919 17920 17921 11803 3817 17922 17923 17924 17925 17926 5186 17927 17928 3974 6887 17929 3785 17930 17931 9467 17932 17933 3955 17934 17935 17936 3368 17937 10526 17938 17939 17940 17941 5175 17942 17943 17944 17945 3809 17946 17947 17948 3810 17949 17950 17951 11057 17952 17953 17954 3870 17955 17956 17957 17958 17959 4870 17960 17961 17962 17963 17964 17965 3869 17966 17967 17968 17969 17970 17971 17972 17973 3488 12986 17974 17975 17976 8206 5828 17977 17978 17979 17980 17981 17982 17983 3879 17984 17985 17986 17987 17988 17989 17990 17991 17992 17993 17994 3716 9947 17995 17996 17997 10511 17998 17999 18000 18001 18002 18003 18004 18005 18006 18007 18008 18009 5107 8226 3882 5850 18010 18011 18012 18013 18014 18015 18016 18017 18018 18019 18020 18021 18022 18023 18024 18025 1858 12778 4200 18026 18027 18028 18029 3852 18030 8981 18031 18032 18033 18034 10649 18035 18036 18037 18038 18039 18040 18041 18042 18043 18044 18045 18046 18047 18048 18049 18050 18051 18052 4016 10514 18053 12681 18054 18055 18056 18057 18058 18059 18060 18061 18062 18063 3995 18064 18065 18066 18067 8368 18068 18069 18070 18071 18072 18073 18074 18075 18076 18077 18078 10671 3859 18079 18080 18081 18082 18083 18084 18085 18086 18087 18088 18089 18090 18091 18092 3967 18093 18094 5239 18095 18096 18097 18098 4321 13122 18099 3949 11064 10614 18100 18101 18102 18103 18104 18105 4856 18106 18107 4147 18108 18109 18110 18111 18112 510 18113 18114 18115 18116 3860 3861 18117 18118 18119 18120 18121 18122 18123 3846 18124 18125 18126 18127 18128 18129 18130 18131 18132 18133 18134 18135 11063 18136 18137 18138 18139 18140 18141 3956 18142 18143 18144 3929 4017 18145 18146 18147 4034 18148 18149 18150 18151 18152 18153 18154 18155 12804 4014 18156 18157 18158 18159 18160 18161 18162 10513 18163 18164 18165 18166 18167 4071 18168 18169 18170 18171 18172 18173 18174 18175 18176 18177 18178 5184 18179 18180 18181 18182 18183 18184 18185 18186 18187 5811 18188 11066 18189 18190 18191 18192 18193 18194 18195 18196 18197 18198 18199 18200 18201 18202 18203 18204 18205 18206 18207 18208 963 3971 3950 18209 18210 18211 18212 18213 18214 4013 3970 850 18215 4075 18216 3992 18217 18218 18219 18220 18221 18222 18223 18224 4015 18225 18226 7706 18227 18228 18229 18230 18231 4081 3975 18232 18233 6477 18234 18235 18236 18237 18238 18239 3917 18240 12371 18241 18242 18243 18244 18245 18246 18247 18248 18249 18250 18251 18252 18253 18254 18255 18256 4858 18257 3572 3965 18258 8402 5187 18259 18260 18261 18262 18263 18264 18265 6595 18266 18267 9968 18268 18269 18270 18271 9969 18272 18273 18274 4077 4102 18275 18276 18277 18278 753 4146 18279 18280 18281 12706 18282 18283 18284 4076 18285 3939 18286 18287 18288 18289 18290 18291 18292 18293 18294 18295 18296 18297 6299 4057 18298 18299 18300 18301 18302 18303 12690 756 18304 18305 681 4241 18306 18307 18308 18309 4125 8208 18310 5841 18311 18312 18313 18314 18315 18316 18317 18318 18319 18320 18321 18322 18323 18324 18325 18326 18327 18328 18329 18330 18331 18332 18333 18334 18335 18336 18337 18338 18339 18340 18341 18342 4115 18343 18344 12696 18345 8211 18346 4150 4137 18347 18348 12689 18349 18350 18351 4149 18352 18353 18354 18355 18356 18357 9970 18358 18359 18360 18361 18362 18363 18364 18365 18366 18367 18368 18369 18370 18371 18372 4134 4151 18373 18374 18375 18376 7681 18377 18378 18379 18380 18381 9971 18382 18383 4859 18384 18385 18386 18387 5193 18388 18389 18390 4141 18391 4198 18392 18393 18394 18395 18396 4080 18397 18398 18399 18400 18401 12976 12978 12805 18402 18403 18404 18405 18406 18407 18408 18409 18410 4208 18411 18412 18413 18414 18415 18416 18417 18418 18419 18420 3840 18421 18422 18423 18424 18425 18426 18427 12803 11062 18428 18429 18430 18431 18432 18433 8220 18434 18435 18436 18437 18438 18439 18440 18441 18442 18443 18444 18445 18446 18447 18448 18449 18450 6978 18451 18452 8407 18453 18454 5207 18455 18456 18457 18458 18459 18460 18461 18462 18463 7680 12199 18464 18465 18466 18467 18468 18469 4286 18470 10304 18471 18472 18473 18474 18475 18476 18477 7076 18478 18479 18480 18481 18482 18483 10541 18484 4284 18485 4214 18486 18487 18488 18489 18490 18491 18492 18493 18494 18495 18496 18497 18498 8212 18499 18500 18501 18502 18503 18504 4209 5206 7463 8982 18505 18506 18507 18508 18509 18510 8214 4264 4265 18511 18512 4282 4292 12670 18513 18514 18515 18516 18517 18518 4367 18519 6240 18520 4710 18521 18522 18523 18524 18525 18526 18527 18528 18529 18530 4169 18531 18532 18533 18534 4495 18535 12691 18536 18537 18538 18539 18540 18541 18542 18543 18544 18545 18546 18547 18548 18549 18550 18551 18552 4266 4298 18553 18554 18555 18556 18557 18558 18559 18560 18561 18562 4285 18563 18564 18565 18566 18567 18568 18569 13001 18570 18571 18572 18573 18574 18575 18576 18577 18578 18579 18580 4424 4371 18581 18582 18583 4322 18584 18585 18586 18587 18588 18589 18590 18591 18592 18593 10590 18594 18595 18596 8215 4369 4338 5209 12807 18597 18598 4377 18599 18600 18601 18602 18603 18604 4366 4193 18605 4861 18606 4344 18607 8217 18608 18609 18610 18611 5222 18612 18613 5214 11071 18614 18615 18616 18617 18618 18619 18620 18621 5208 18622 18623 18624 18625 18626 18627 18628 18629 18630 18631 18632 5857 18633 18634 3617 18635 18636 18637 18638 18639 12692 18640 18641 18642 18643 18644 18645 18646 531 18647 18648 18649 18650 18651 18652 18653 18654 18655 18656 18657 18658 18659 18660 18661 18662 18663 18664 18665 12112 18666 18667 18668 18669 18670 18671 18672 18673 18674 18675 18676 18677 18678 18679 18680 12694 18681 18682 4302 18683 12113 18684 18685 4732 18686 18687 18688 18689 18690 18691 18692 18693 18694 18695 18696 18697 18698 530 18699 18700 4370 4267 18701 18702 18703 18704 18705 18706 18707 4315 18708 18709 18710 18711 18712 18713 18714 18715 8219 4546 18716 18717 18718 18719 18720 18721 18722 4252 18723 18724 18725 4383 18726 18727 18728 18729 18730 10967 18731 18732 18733 18734 8585 12817 18735 18736 18737 18738 18739 4457 18740 9469 1227 8222 18741 12703 18742 18743 18744 18745 18746 18747 18748 18749 18750 18751 18752 18753 18754 18755 18756 10965 18757 18758 18759 18760 18761 18762 10582 18763 12693 4339 18764 18765 6869 18766 18767 18768 18769 18770 18771 18772 18773 4430 4419 18774 18775 18776 18777 18778 18779 18780 18781 18782 18783 11078 4438 18784 18785 18786 18787 18788 4397 18789 18790 18791 18792 18793 18794 18795 18796 6831 18797 18798 18799 18800 18801 18802 18803 10613 4447 18804 18805 18806 18807 5859 18808 18809 18810 18811 4443 18812 18813 4444 18814 18815 18816 18817 18818 4435 18819 18820 18821 18822 8987 18823 18824 18825 18826 18827 18828 12709 18829 4308 18830 18831 18832 862 6151 18833 18834 18835 18836 18837 18838 18839 7081 12700 18840 18841 18842 4423 4456 18843 18844 18845 18846 18847 4522 4507 18848 18849 18850 18851 18852 18853 18854 18855 18856 12808 18857 18858 18859 18860 18861 18862 18863 18864 18865 18866 18867 5866 18868 18869 18870 18871 18872 18873 18874 18875 18876 18877 18878 18879 18880 13119 18881 18882 18883 18884 18885 18886 18887 18888 18889 18890 18891 18892 18893 18894 18895 1283 18896 18897 5862 12701 18898 18899 18900 18901 18902 18903 18904 18905 18906 18907 18908 18909 18910 18911 18912 18913 18914 18915 18916 18917 18918 12793 18919 18920 18921 18922 18923 18924 18925 13003 18926 18927 18928 18929 18930 8221 4490 18931 18932 18933 18934 18935 18936 12985 18937 18938 18939 18940 18941 18942 18943 18944 7682 18945 18946 18947 4514 18948 18949 18950 18951 18952 18953 18954 18955 18956 18957 10284 18958 18959 4521 18960 18961 18962 18963 250 18964 18965 6161 18966 18967 18968 18969 18970 18971 18972 18973 5864 18974 18975 18976 18977 18978 18979 18980 18981 18982 18983 18984 5868 18985 18986 18987 18988 5875 5867 18989 18990 18991 18992 18993 18994 18995 18996 18997 18998 18999 19000 19001 19002 19003 19004 19005 19006 19007 19008 19009 19010 19011 19012 19013 19014 19015 19016 19017 19018 19019 19020 19021 19022 19023 9037 4860 19024 8695 19025 19026 19027 19028 19029 19030 19031 19032 19033 19034 19035 19036 19037 19038 19039 19040 19041 19042 19043 8230 19044 19045 19046 19047 19048 19049 12365 19050 19051 19052 19053 12969 19054 19055 19056 12989 19057 19058 19059 6157 19060 19061 19062 19063 19064 19065 19066 19067 19068 19069 19070 9470 19071 5233 19072 4533 19073 19074 19075 19076 19077 19078 8088 19079 19080 19081 19082 19083 19084 19085 19086 19087 19088 19089 19090 19091 19092 19093 19094 19095 19096 19097 19098 19099 19100 19101 19102 19103 19104 19105 19106 19107 19108 19109 19110 19111 19112 19113 19114 19115 19116 19117 19118 5242 19119 19120 19121 19122 19123 5244 19124 19125 19126 19127 19128 19129 19130 19131 19132 19133 19134 19135 19136 19137 19138 19139 19140 19141 19142 19143 19144 19145 19146 19147 19148 19149 19150 19151 19152 19153 19154 19155 19156 19157 19158 19159 19160 19161 19162 19163 19164 19165 19166 19167 19168 19169 19170 19171 19172 8223 19173 19174 19175 19176 19177 19178 19179 19180 19181 19182 6837 19183 19184 19185 19186 19187 19188 19189 19190 19191 19192 19193 19194 19195 19196 19197 10345 19198 19199 5883 19200 19201 7096 19202 19203 19204 19205 19206 4474 19207 19208 19209 19210 19211 1867 19212 19213 19214 19215 19216 19217 19218 19219 19220 522 19221 19222 19223 19224 19225 19226 19227 19228 19229 11080 11081 19230 19231 19232 19233 19234 19235 19236 19237 19238 19239 19240 19241 19242 19243 19244 19245 19246 19247 19248 19249 19250 19251 19252 19253 19254 19255 19256 19257 19258 19259 19260 19261 19262 19263 19264 6294 19265 19266 19267 19268 19269 19270 19271 19272 19273 19274 19275 19276 19277 19278 19279 19280 19281 19282 19283 5873 19284 19285 19286 19287 19288 19289 8227 19290 19291 19292 19293 19294 19295 19296 5240 19297 5176 19298 19299 19300 19301 19302 19303 19304 19305 19306 1866 19307 19308 19309 19310 19311 19312 10295 19313 19314 19315 19316 19317 12354 19318 19319 19320 19321 19322 19323 19324 19325 19326 19327 19328 19329 6162 4746 4863 19330 19331 19332 19333 533 19334 19335 19336 19337 19338 19339 19340 19341 19342 19343 11084 19344 19345 19346 19347 19348 19349 19350 5876 19351 11085 19352 19353 19354 19355 19356 19357 19358 19359 19360 19361 19362 19363 19364 19365 19366 19367 19368 19369 19370 19371 19372 19373 19374 19375 19376 19377 19378 19379 19380 19381 19382 19383 19384 19385 19386 19387 7466 19388 19389 19390 19391 19392 19393 19394 19395 19396 19397 7684 19398 19399 19400 4865 19401 12813 19402 19403 19404 12356 19405 19406 19407 19408 19409 1514 19410 19411 19412 19413 19414 19415 19416 19417 19418 19419 19420 19421 525 19422 19423 19424 19425 19426 19427 19428 19429 19430 19431 10558 4864 19432 19433 19434 19435 19436 19437 19438 19439 19440 19441 12355 19442 19443 8410 19444 19445 19446 19447 19448 19449 19450 19451 19452 19453 19454 19455 19456 19457 4892 19458 19459 19460 19461 19462 4879 19463 19464 19465 19466 19467 19468 19469 19470 19471 19472 19473 19474 19475 19476 19477 19478 19479 13002 12678 19480 19481 19482 19483 19484 19485 19486 19487 19488 19489 19490 19491 19492 19493 19494 19495 19496 19497 19498 19499 19500 19501 19502 19503 4543 9471 19504 19505 19506 19507 19508 19509 19510 19511 19512 19513 19514 19515 19516 19517 19518 19519 19520 529 19521 19522 19523 19524 19525 19526 19527 19528 4345 19529 19530 19531 19532 19533 19534 19535 19536 19537 19538 19539 19540 19541 19542 19543 19544 9474 19545 5880 19546 19547 19548 19549 19550 19551 19552 19553 8416 19554 19555 19556 19557 19558 12712 5879 19559 19560 1863 19561 19562 12716 19563 19564 19565 19566 19567 19568 19569 19570 19571 19572 19573 19574 19575 19576 19577 11293 19578 19579 19580 19581 19582 19583 19584 19585 19586 19587 10568 19588 19589 19590 19591 19592 5255 19593 19594 19595 19596 19597 19598 12814 19599 19600 19601 19602 19603 19604 19605 19606 19607 19608 19609 19610 19611 19612 19613 19614 19615 19616 19617 19618 19619 19620 19621 19622 19623 19624 19625 19626 19627 19628 19629 7088 19630 19631 19632 19633 19634 19635 19636 19637 19638 19639 19640 19641 19642 19643 19644 19645 5259 19646 19647 19648 19649 19650 19651 19652 19653 19654 19655 19656 19657 19658 19659 19660 19661 19662 19663 19664 19665 19666 19667 19668 19669 19670 19671 19672 19673 10599 19674 19675 19676 19677 19678 19679 19680 19681 19682 19683 19684 19685 19686 1304 19687 19688 19689 19690 19691 19692 19693 19694 19695 19696 19697 19698 19699 19700 19701 19702 19703 19704 19705 9475 19706 19707 19708 19709 19710 19711 19712 12722 19713 19714 19715 19716 19717 19718 19719 19720 19721 19722 19723 19724 19725 19726 6238 19727 19728 19729 19730 19731 19732 19733 19734 19735 19736 12820 19737 19738 19739 19740 19741 19742 19743 19744 19745 19746 19747 19748 19749 19750 19751 19752 19753 19754 19755 4449 19756 19757 11094 19758 19759 19760 5650 19761 19762 19763 19764 11088 19765 12357 19766 19767 19768 8996 19769 19770 5881 12818 19771 19772 19773 19774 19775 19776 19777 19778 19779 19780 19781 19782 19783 19784 19785 19786 19787 19788 19789 19790 19791 19792 19793 19794 19795 19796 19797 19798 19799 19800 19801 19802 19803 19804 19805 19806 19807 19808 19809 19810 11095 19811 19812 19813 19814 8231 4866 19815 8218 19816 19817 19818 19819 19820 19821 19822 19823 19824 19825 19826 19827 19828 19829 7590 19830 19831 19832 19833 19834 19835 19836 19837 19838 19839 19840 19841 19842 19843 19844 19845 19846 12724 19847 19848 19849 19850 19851 19852 19853 19854 19855 19856 19857 19858 19859 19860 19861 12718 19862 19863 19864 19865 19866 19867 19868 19869 19870 19871 19872 19873 19874 19875 19876 19877 19878 19879 19880 19881 19882 19883 19884 19885 19886 19887 19888 19889 19890 19891 19892 10575 19893 19894 19895 19896 19897 19898 19899 19900 12823 19901 19902 19903 19904 19905 19906 19907 19908 19909 19910 19911 19912 19913 19914 19915 19916 19917 19918 19919 19920 19921 19922 19923 19924 19925 19926 19927 19928 11099 8232 19929 5899 19930 19931 19932 19933 19934 19935 19936 19937 19938 19939 19940 19941 19942 19943 19944 19945 19946 19947 19948 19949 19950 19951 19952 19953 19954 10040 19955 13006 19956 19957 12723 19958 19959 19960 19961 19962 19963 19964 19965 12717 19966 4869 19967 19968 19969 19970 19971 6835 10572 19972 19973 19974 11261 10576 19975 19976 19977 19978 11103 19979 19980 19981 19982 19983 19984 19985 19986 5894 19987 539 19988 19989 7101 19990 19991 19992 19993 19994 19995 19996 19997 19998 19999 20000 20001 20002 20003 20004 10574 10322 20005 20006 20007 20008 20009 20010 20011 20012 20013 20014 20015 20016 20017 20018 20019 20020 20021 20022 20023 20024 20025 20026 20027 20028 20029 20030 20031 20032 20033 20034 20035 20036 20037 20038 20039 10583 20040 20041 20042 20043 20044 20045 20046 20047 20048 20049 20050 20051 20052 20053 20054 20055 20056 20057 20058 20059 20060 20061 20062 20063 20064 20065 20066 20067 20068 20069 20070 20071 20072 20073 7467 20074 20075 20076 20077 20078 20079 20080 20081 11100 20082 20083 20084 20085 20086 20087 20088 20089 20090 20091 20092 20093 20094 20095 20096 20097 20098 12741 20099 20100 20101 20102 7591 20103 20104 20105 20106 20107 20108 20109 20110 20111 20112 20113 20114 20115 20116 20117 20118 20119 20120 20121 20122 20123 20124 20125 20126 20127 20128 20129 20130 20131 20132 20133 20134 20135 20136 20137 20138 20139 20140 20141 20142 20143 20144 20145 20146 20147 20148 20149 20150 20151 20152 20153 20154 20155 20156 20157 20158 20159 20160 20161 20162 20163 20164 20165 20166 20167 20168 20169 20170 20171 20172 20173 20174 20175 13155 10315 20176 20177 20178 20179 20180 20181 20182 20183 20184 20185 20186 20187 20188 20189 10618 20190 20191 20192 20193 20194 20195 4373 20196 12729 20197 20198 20199 20200 20201 20202 20203 20204 20205 20206 20207 20208 12725 20209 20210 20211 12358 6230 20212 20213 20214 20215 20216 20217 20218 20219 20220 20221 20222 7090 6191 20223 20224 20225 20226 20227 20228 20229 20230 20231 20232 20233 20234 545 20235 20236 20237 20238 20239 20240 20241 20242 20243 20244 20245 20246 20247 20248 20249 20250 20251 20252 20253 20254 20255 20256 2762 20257 20258 20259 20260 8236 20261 20262 20263 20264 20265 20266 20267 20268 8238 20269 20270 20271 7592 20272 20273 20274 20275 20276 20277 20278 20279 20280 20281 20282 20283 20284 20285 20286 20287 20288 20289 20290 20291 6171 20292 20293 20294 20295 20296 20297 20298 20299 20300 20301 20302 20303 20304 20305 20306 20307 20308 20309 20310 20311 20312 20313 20314 20315 20316 20317 20318 20319 20320 20321 20322 20323 7715 20324 20325 20326 20327 20328 12826 6844 20329 20330 20331 20332 20333 20334 20335 3669 20336 20337 20338 20339 20340 20341 20342 20343 20344 20345 20346 20347 20348 20349 20350 20351 20352 20353 20354 20355 20356 20357 20358 20359 20360 20361 20362 20363 20364 20365 20366 20367 12726 20368 20369 20370 20371 20372 20373 20374 10565 20375 20376 20377 20378 20379 20380 20381 20382 20383 20384 20385 20386 20387 20388 20389 20390 20391 20392 20393 20394 20395 20396 20397 20398 20399 20400 20401 20402 20403 20404 20405 20406 20407 12359 20408 8237 20409 20410 20411 20412 20413 20414 20415 8240 20416 20417 20418 20419 20420 20421 20422 20423 20424 20425 20426 20427 20428 20429 6198 20430 20431 20432 20433 20434 20435 20436 20437 20438 20439 20440 20441 20442 20443 20444 20445 3534 20446 20447 10603 13009 20448 20449 20450 20451 20452 20453 20454 20455 20456 20457 20458 20459 20460 20461 20462 20463 20464 20465 20466 20467 20468 7593 20469 20470 20471 20472 20473 20474 20475 20476 20477 20478 20479 20480 20481 20482 20483 20484 20485 20486 20487 20488 20489 20490 20491 11107 20492 20493 20494 20495 20496 20497 20498 20499 20500 20501 20502 20503 20504 8239 20505 20506 20507 20508 20509 20510 20511 20512 20513 20514 20515 20516 20517 20518 20519 20520 20521 20522 20523 20524 20525 20526 20527 20528 20529 20530 20531 20532 20533 20534 7594 20535 20536 20537 20538 20539 20540 20541 20542 20543 20544 20545 20546 20547 20548 20549 20550 20551 20552 20553 20554 6177 20555 5739 4882 20556 20557 20558 20559 20560 20561 20562 20563 20564 10331 20565 20566 20567 20568 20569 1276 20570 20571 20572 20573 20574 20575 20576 20577 20578 20579 20580 20581 20582 20583 20584 20585 20586 20587 20588 20589 20590 20591 20592 20593 12362 20594 20595 20596 6190 20597 20598 20599 20600 20601 20602 20603 20604 20605 11109 20606 20607 20608 20609 20610 20611 20612 20613 20614 20615 8242 20616 20617 20618 20619 20620 20621 20622 20623 20624 20625 20626 20627 10606 20628 20629 20630 20631 20632 20633 20634 20635 20636 20637 20638 20639 20640 20641 20642 20643 20644 20645 20646 20647 20648 20649 20650 20651 20652 20653 20654 20655 20656 20657 20658 20659 20660 20661 20662 20663 20664 20665 20666 20667 20668 20669 20670 20671 20672 20673 20674 20675 11122 20676 20677 20678 20679 20680 20681 20682 20683 7688 20684 20685 20686 20687 20688 20689 20690 20691 20692 20693 20694 20695 20696 20697 20698 20699 20700 20701 20702 20703 20704 20705 20706 20707 20708 20709 20710 20711 7884 20712 20713 9479 20714 20715 20716 20717 20718 20719 20720 20721 20722 20723 12455 20724 20725 20726 20727 20728 20729 20730 20731 20732 20733 20734 20735 10593 20736 20737 20738 20739 20740 20741 20742 20743 6176 20744 20745 20746 20747 20748 20749 20750 20751 20752 20753 20754 20755 20756 20757 9481 20758 20759 20760 20761 20762 20763 20764 20765 20766 20767 20768 20769 20770 20771 20772 20773 20774 20775 20776 20777 20778 20779 20780 20781 20782 20783 20784 20785 20786 11944 12750 20787 6179 12266 20788 20789 20790 20791 20792 20793 20794 20795 20796 20797 20798 20799 20800 20801 20802 20803 20804 20805 20806 20807 20808 20809 20810 20811 20812 12368 20813 20814 20815 20816 20817 20818 20819 20820 20821 20822 10335 20823 20824 20825 20826 20827 20828 20829 20830 20831 20832 20833 20834 20835 7093 20836 20837 20838 20839 20840 20841 20842 13018 6181 20843 20844 20845 20846 20847 20848 20849 20850 20851 20852 20853 20854 20855 20856 20857 20858 20859 20860 20861 20862 20863 20864 20865 20866 20867 20868 10362 20869 10336 20870 20871 20872 20873 20874 20875 20876 20877 20878 20879 20880 20881 20882 20883 20884 20885 20886 20887 4202 10577 20888 8241 20889 20890 20891 20892 20893 20894 20895 20896 20897 20898 10037 20899 20900 20901 20902 20903 20904 20905 20906 20907 20908 20909 20910 20911 20912 20913 20914 20915 20916 20917 20918 20919 20920 20921 20922 20923 20924 20925 20926 20927 20928 20929 20930 20931 20932 20933 20934 20935 20936 20937 20938 20939 20940 20941 20942 20943 20944 20945 20946 20947 20948 20949 20950 242 20951 20952 20953 4451 20954 12734 20955 20956 12256 20957 20958 20959 20960 20961 20962 20963 20964 20965 20966 20967 20968 20969 20970 20971 13030 20972 20973 20974 20975 20976 20977 20978 20979 20980 20981 20982 20983 20984 12753 20985 11115 20986 20987 20988 20989 20990 20991 20992 20993 20994 20995 20996 20997 20998 20999 21000 21001 21002 21003 21004 21005 11641 21006 12366 21007 21008 21009 21010 21011 21012 21013 21014 21015 21016 21017 21018 21019 21020 21021 21022 21023 21024 21025 21026 21027 21028 21029 21030 21031 21032 10631 21033 21034 21035 21036 9383 21037 21038 21039 10605 21040 21041 150 21042 21043 21044 10343 21045 21046 21047 11812 21048 21049 21050 21051 21052 21053 21054 21055 21056 21057 21058 21059 21060 21061 6185 21062 21063 21064 21065 21066 21067 21068 21069 21070 21071 21072 21073 21074 21075 21076 21077 21078 21079 21080 21081 21082 21083 21084 21085 21086 21087 21088 21089 21090 21091 21092 10359 21093 21094 21095 21096 21097 21098 21099 21100 21101 21102 21103 21104 21105 21106 21107 21108 21109 21110 21111 21112 21113 21114 21115 21116 5761 21117 21118 21119 21120 21121 21122 21123 21124 21125 21126 21127 21128 21129 21130 21131 21132 21133 21134 21135 21136 21137 21138 21139 21140 21141 21142 21143 21144 21145 21146 21147 21148 12738 21149 21150 21151 21152 21153 21154 21155 6215 9002 21156 21157 21158 6194 21159 11096 21160 21161 21162 21163 21164 21165 21166 21167 21168 21169 21170 12361 21171 21172 21173 21174 21175 21176 21177 21178 21179 21180 21181 21182 21183 21184 21185 21186 21187 21188 21189 21190 21191 12367 21192 21193 21194 21195 21196 21197 21198 21199 21200 21201 21202 21203 21204 21205 21206 21207 21208 21209 21210 21211 21212 6836 21213 21214 21215 21216 21217 21218 21219 21220 21221 21222 21223 21224 21225 21226 21227 21228 21229 21230 21231 5911 21232 21233 21234 21235 6201 21236 21237 21238 21239 21240 21241 21242 21243 21244 21245 21246 21247 21248 21249 21250 21251 21252 21253 21254 21255 21256 21257 21258 21259 6218 21260 21261 21262 21263 21264 21265 21266 21267 4275 21268 8243 21269 21270 21271 21272 13028 21273 21274 21275 21276 21277 10609 21278 21279 5909 21280 21281 21282 21283 21284 21285 21286 21287 6203 21288 21289 10111 21290 21291 21292 21293 21294 21295 12735 21296 6168 21297 21298 21299 21300 6205 21301 21302 21303 21304 21305 21306 21307 21308 21309 21310 21311 21312 21313 21314 21315 21316 21317 21318 21319 21320 21321 21322 21323 21324 6208 13161 21325 21326 21327 21328 21329 21330 21331 21332 21333 21334 21335 10670 21336 21337 8247 21338 21339 21340 21341 21342 21343 21344 21345 21346 9298 21347 21348 6204 21349 21350 21351 21352 21353 21354 21355 21356 21357 21358 21359 21360 21361 21362 21363 21364 21365 21366 21367 21368 21369 21370 21371 21372 21373 21374 21375 8246 21376 21377 21378 6210 21379 21380 21381 21382 21383 6235 21384 21385 21386 21387 21388 21389 21390 21391 1258 21392 21393 21394 21395 10617 21396 21397 21398 21399 21400 21401 21402 21403 10615 1550 6239 21404 21405 21406 6241 21407 9482 21408 21409 21410 10366 21411 21412 21413 21414 21415 21416 21417 21418 21419 21420 21421 21422 21423 21424 21425 21426 21427 21428 21429 21430 21431 21432 21433 21434 21435 21436 21437 21438 21439 21440 21441 21442 21443 21444 21445 21446 21447 21448 21449 21450 21451 21452 21453 21454 21455 21456 21457 21458 21459 21460 21461 21462 21463 21464 21465 546 21466 7110
145 8896 21467 678 6069 21468 1014 5339 1438 21469 1626 1665 7480 5277 1792 1104 1787 21470 1664 377
146 5248 5840 1550 21471 21472 4797 21473 21474 21475 13461 5113 5766 14282 9740 9715 15122 1800 21476 16553 16666
147 21477 13241 6904 11279 9063 21478 21479 7473 21480 21481 21482 2024 21483 21484 9601 6996 21485 21486 21487 12004 21488 21489 9339 21490 16679 1565 6644 5406 8058 11970 6591 21491 21492 7023 21493 563 13695 11972 21494 21495 9629 9628 21496 21497 8690 13166 21498 8490 21499 14164 21500 483 9751 13767 21501 1955 14056 21502 14028 9767 2093 21503 21504 14552 21505 9781 9836 21506 21507 14111 2348 8165 2197 10482 14449 21508 15063 633 8224 14383 5250 10247 6758 5706 21509 3268 9198 463 6788 11043 295 466 5716 6282 9922 9205 9207 15581 10293 14836 14516 14127 8561 5734 14847 21510 16158 9903 12659 794 5745 9223 16727 10261 16658 21511 10483 21512 3891 9877 12663 15893 16805 21513 10279 468 799 21514 17190 9231 17296 3584 11046 9931 17493 21515 15766 3663 12283 5791 21516 21517 21518 17561 5802 21519 21520 3725 21521 21522 3871 16678 10513 17991 21523 21524 21525 18088 10514 13060 21526 9747 4125 18857 21527 21528 19023 13833 21529 19502 19741 5876 10297 21530 6569 8560 21531 21532 19221 21533 10290 21534 5881 20184 20841 17065 21535 20570 20176 20228 21536 10894 7591 21537 21538 7788 431 21539 21540 21541 21542 21068 14730 21313 21404 21543 11118 21544 21154 21545 14755 21546 21547 21300 21413 21004 21548 21549 21550 21551 21552 21553 21554 20615 21555 17998 21556 21557 21558 21559 21560 21561 21562 18199 21563 21564 4417 21565 21566 21567 21568 21569 10592 4493 21570 21571 21572 21573 21574 21575 21576 21577 6238 21578 20434 17523 21378 21579 21580 10292 21581 3473 13692 21582 21583 21584 21585 8969 21586 21587 10652 20001 17277 21588 21589 21590 14620 10642 3277 3865 21591 21592 20985 21593 21594 21595 21596 3870 21597 21598 21599 21600 21601 7916 21602 21603
148 21604 1004 1008 1095 21605 21606 5741 21607 7212 1746 13097 72 21608 161 2130 7745 5663 21609 21610 8263 21611 14676 2817 2200 8433 6363 21612 7324 21613 4650 5691 21614 6407 1140 14682 21615 2794 2639 21616 21617 8399 6369 14907 21618 21619 11776 8925 8391 21620 5718 13462 12221 21621 21622 21623 21624 21625 975 21626 4956 673 21627
149 21604 8354 8869 8870 8896 12871 12873 1888 21628 21629 1872 5985 5658 1367 21630 21631 7853 1066 4788 21632 12319 21633 8397 8339 5663 13212 13080 8328 21634 7480 8427 654 21635 21636 7752 13718 8358 21637 21638 8365 21639 8325 6543 4775 21640 21641 5959 15638 21642 6273 21643 8343 5983 6550 1095 233 21644 8373 1980 21645 21646 11913 2056 11916 21647 1432 6405 9575 6406 2177 5982 13081 21648 21526 211 21649 13503 2923 12862 13066 21650 21651 21652 6275 8005 6313 1807 21653 136 8371 1763 13090 161 21654 9649 21655 13084 6320 21656 21657 5962 21658 11914 9561 13495 21659 8320 21660 2036 12167 12877 1838 8336 21616 21661 9391 4819 4818 21662 21663 1855 8437 21664 6088 1595 4833 8412 1810 6407 2358 1140 15368 8403 1653 8360 1954 781 21665 682 21666 2832 5718 21667 21668 5250 463 21669 1063 14855 21670 21671 6548 21672 21673 1876 21674 1827 895 1828 4808 6544 21675 17372 16828 4845 5753 1843 5146 10265 21676 16752 6217 21677 3468 17683 5793 5763 21678 6196 5801 21679 7345
150 21604 5616 6510 1592 1541 5615 10867 21680 1915 439 11354 6519 21681 21682 6906 5581 12868 8870
151 8614 21683 21684 10770 21685 21686 9574 21687 13353 21688 21689 21690 21691 12889 21692 21693 21694 21695 2108 21696 21697 21698 21699 21700 21701 21702 792 21703 3737 21704 13111 21705 21706 21707 21708 1837 21709 17653 21518 481 3779 21710 21711 17641 17741 21712 18232 21713 21714 5825 21715 21716 21717 21718 21719 4040 10524 21720 21721 21722 21723 21724 21725 21726 11074 21727 4393 3962 5175 21728 21729 8222 21730 21731 21732 21733 5875 21734 888 5890 4514 21735 20616 5907 10897 21736 20916 21737 8104 21738 21739 21740 21741 6534 21742 21743 21744 21745 21746 21747 21748 5704 21749 21750 5708 21751 21752 21753 6535 21754 21755 12770 21756 8249 21757
152 21758 11275 7810 7409 149 7815 21759 7824 7813 21760 1293 8095 21761 8074 11281 12157
153 21762 21763 7045 10421 21764 21765 7607 21766 669 21505 21767 1424 21768 9506 9030 21769 9074 21483 21770 9584 49 9508 5629 6279 21771 9033 21772 13319 10879 5622 21773 9561 5632 21774 21775 21776 21777 21778 13413 21779 21780 21781 10883 13921 21782 21783 9042 21784 21785 21786 21787 8370 21788 9502 21789 21790 21791 5978 21792 21793 21794
154 8590 7500 7867 6506 11278 5450 10 150 567 152 153 154 166 172 12853 100 186 21795 191 12276 10845 21796 21797 121 156 564 441 7803 21798 8818 21799 21800 6981 7997 560 8605 5584 6757 21801 21802 12037 9587 251 21803 5568 21804 7996 1924 13263 21805 1991 11205 10784 6748 21806 775 2035 13189 5376 21807 565 6505 21808 21809 8658 21810 21811 8282 5649 21812 21813 21814 96 6866 8620 12032 5628 21815 21816 71 6667 8618 5571 21817 6880 21818 21819 5570 5572 5573 21820 21821 21822 12393 12347 8806 147 224 6601 4922 4944 21823 6661 6662 13292 8725 5600 11339 6663 572 21824 5596 4890 566 21825 21826 8810 5643 12866 7012 6665 6666 5776 90 12905 8105 21827 21828 286 583 13521 8782 6513 328 6664 6669 1103 10624 9596 13665 190 4940 21829 14736 163 21830 4958 5693 21831 13705 21832 12046 21833 2090 21834 3067 1569 6671 679 21835 86 2134 21836 12338 92 168 13658 21837 7200 8030 1507 21838 8703 12349 21839 21840 4976 13843 118 6923 21841 388 11971 13885 21842 13900 136 21843 13894 74 164 21844 8598 12439 8808 21845 21846 13691 21847 8790 14044 105 6914 12299 12314 5585 8493 8507 1 335 5587 21848 6687 21849 12422 6764 21850 14087 5360 9721 6770 126 348 6327 6771 6772 21851 10937 21852 8106 8118 8024 13381 21853 6736 4994 4892 9746 12480 5384 21854 8604 94 8673 14235 14016 2283 14177 1582 171 112 13661 6734 14101 21855 14006 9673 21856 21857 4609 8794 1069 21858 21859 21860 6043 259 6742 21861 21862 14381 8082 6827 167 12353 635 12383 14374 12404 9803 255 14411 6778 220 254 14426 106 8809 13781 14226 12435 10804 21863 21864 9758 21865 7869 21866 8517 14536 46 14567 1492 8135 6042 21867 21868 1977 6564 21869 21870 21871 21872 14169 21873 10200 337 6356 14610 13529 456 203 14623 292 8108 21874 12351 56 14686 8600 14213 8132 8795 8081 13424 52 228 14692 21875 5029 13634 22 12069 14108 1155 21876 21877 14427 265 6856 138 21878 294 21879 12318 14802 7550 6751 10214 9683 12440 428 669 21880 14927 33 5546 195 8530 14987 21881 14939 14938 137 21882 21883 2413 14993 188 4648 14365 14989 6076 325 9817 21884 79 21885 15106 3103 21886 13604 21887 113 21888 14990 21889 8804 15161 15247 21890 275 21891 2592 10797 15226 1003 21892 13901 15294 21893 15339 6830 21894 5435 2761 11208 8107 43 21895 1034 21896 9617 21897 15484 192 9854 268 14906 2785 10228 1237 7441 8374 21898 10229 15640 14964 5063 2833 21899 21900 15683 15660 8538 2883 349 20368 15478 15666 21901 21902 21903 2606 8156 21904 3228 2842 21905 21906 5087 21907 15894 21908 21909 9865 1018 21910 15977 16035 21911 21912 16045 5080 9874 16073 364 6872 21913 12087 5095 16202 12525 21914 2648 21915 8819 13997 252 2800 21916 6126 3076 5068 21917 21918 8062 17530 21919 3066 21920 16385 16404 3092 5114 3079 4989 21921 9696 16383 16449 21922 3271 14083 16510 21923 8545 16516 8382 16398 5016 21924 16528 21925 16615 21926 21927 14958 9907 280 2795 10257 3213 5682 10791 21928 6871 21929 16846 12547 21930 16791 6884 2914 16187 15129 17066 16943 3368 17025 16883 21674 17037
155 21931 21932 21933 21934 2170 21935 21936 21937 21938 21939 21940 21941 21942 1539 21943 21756 6540 6534 21944 21945
156 1554 5481 4556 7729 21946 21947 21948 7786 2164 21949 21950 21951 21952 3513 21953 21954 21955 21956 21957 21958 21959 21960 21961
157 9560 21962 6515 9426 1119 589 7858 2708 11408 2641 11407 21963 4682 11423 11435 3424 21964 21965 21966 21967 21968 21969 21970 21971 9318 21972
158 54 2320 71 208 52 8 46 5356 4892 8596 10171 7192 21973 159 22 6947 12 3075 60 124 12306 12313 7915 21974 21975 8580 21976 21977 7 181 7540 12474 6505 267 11205 0 679 8046 92 96 6886 21978 12326 8282 13273 11207 138 9654 126 12342 4938 1103 13601 21979 225 8495 1066 21980 8105 13686 21981 21982 113 21983 13917 13874 428 13903 171 21827 21984 6742 21985 1031 14054 2134 21986 348 294 524 10802 14168 429 21853 493 500 5436 108 265 1384 12594 21987 21988 21989 1702 21990 14429 6789 282 959 3097 271 8516 13399 8552 14661 14554 13067 9716 21991 7880 5530 956 7439 954 3234 3089 15010 6090 2520 21885 14989 15127 21992 14184 94 258 112 15253 326 13661 2757 14692 15322 14101 14610 7441 10228 15226 347 15684 21993 21994 15735 2951 12916 16045 364 6874 6830 1672 16161 3229 6879 5225 4922 16404 7550 16551 6888 16615 21995 21996 16943 17267 8864 8176 17031 1125 17057 619 963 13933 9673 3391 456 18345 7455 9819 2883 2409 5682 1835 21997 17631 21998 203 17771 6884 6889 17777 3127 3877 6897 21999 18074 18133 6871 22000 12454 18350 22001 5207 12930 22002 22003 18780 12932 20300 12943 12956 10559 22004 19317 22005 12978 19241 19540 7457 6470 19817 19901 13007 129 22006 7087 20144 22007 19058 13015 20338 5784 1266 22008 13011 20637 22009 22010 20772 7445 22011 640 19480 4241 62 5381 22012 20326 10510 21067 22013 22014 2949 22015 22016 22017 22018 16469 19422 22019 7891 13047 22020 22021 7972 22022 22023
159 54 8 10937 22024 22025 62 10951 22026 378 22027 22028 11 374 269 22029 367 21973 44 1695 8249 111 33 22030 67 34 23 12276 7185 12 22031 22032 7406 104 12480 22033 28 21877 775 5 6909 8256 68 107 13213 5609 3 7199 14 22034 10869 22035 1293 694 1355 22036 12029 660 43 687 22037 31 11205 975 195 8839 9890 22038 10952 6 237 30 22039 316 19 22040 72 22041 6809 7837 339 22042 10750 22043 11207 101 13285 8430 138 194 22044 22045 22046 22047 119 26 22048 127 196 6861 137 5610 4938 13334 21875 13616 6656 22049 136 170 7807 2413 12475 22050 436 974 6283 1269 10953 22051 12314 440 188 108 13208 12878 18048 428 22052 22053 152 100 21800 22054 12390 21798 22055 670 8622 6918 22056 22057 134 88 7540 8619 113 22058 7478 45 66 10802 12281 5597 10954 41 10947 22059 677 390 17 7 60 22060 5595 22061 2 22062 7206 215 85 16 22063 1013 22064 144 155 21805 21799 21797 49 114 7213 10946 57
160 54 22065 22066 5388 22067 6668 5339 22068 1063 22069 1079 22070 22071 1557 22072 22073 5970 22074 1887 1009 22075 22076 22077 5480 8750 22078 6780 1925 723 13266 22079 167 21894 5581 22080 657 1075 95 4922 8388 12336 4913 22081 8344 22082 22083 22084 90 9148 22085 22086 11337 5347 103 6624 7196 8354 2044 686 12468 1975 5477 4930 2069 22087 5495 4559 629 986 22088 8490 22089 4938 22090 8918 6637 1423 9592 22091 1426 22092 233 4585 419 1767 7751 22093 22094 4569 22095 22096 1849 2053 7424 22097 22098 22099 9635 12877 4602 22100 990 22101 5972 168 630 8293 6874 22102 22103 171 9668 13505 4974 4587 624 4613 22104 13554 4605 12883 22105 22106 4997 626 2178 995 423 9663 22107 240 14084 8398 22108 14065 22109 22110 22111 22112 9670 2246 22113 8905 9649 22114 22115 22116 2556 12963 10725 22117 22118 6351 4622 8263 22119 8551 5286 13864 4584 2260 254 22120 2337 286 1591 11681 2273 4612 5546 10469 9680 1760 5299 13486 335 604 9753 14359 10711 5531 9391 13711 442 9758 6724 13550 444 14368 12896 22121 22122 13776 8158 22123 9418 22124 8892 14410 8122 9372 14587 4996 22125 7041 8910 2323 22126 6767 5544 7760 12450 5525 2440 7044 2389 4649 2485 14967 8383 310 22127 1050 22128 9765 15061 1108 6079 1115 7769 9817 22129 8926 7339 8900 22130 6785 9767 2471 4646 10520 14528 14450 453 22131 2748 15258 9824 4661 22132 3374 4653 22133 12929 8548 4647 14796 6934 2854 22134 8163 1816 7442 21615 5315 22135 8832 22136 15547 8149 15011 22137 2713 15513 8912 10791 5557 7898 3228 415 22138 22139 6830 22140 9728 11995 22141 8161 458 22142 6508 11992 10229 10482 15145 22143 9177 15702 5097 22144 22145 2569 22146 220 9802 10571 22147 5108 5087 22148 9865 21617 12942 15063 22149 22150 355 22151 22152 15823 22153 12931 22154 22155 22156 22157 12995 22158 15452 22159 15679 6115 699 22160 14906 22161 12875 12449 15919 1720 22162 22163 22164 4678 9854 2832 22165 2786 8546 21917 22166 12905 16381 8543 14928 22167 1166 22168 3229 2849 7507 8561 9860 22169 22170 22171 22172 16636 22173 12947 10233 7416 1149 9907 15760 10559 22174 22175 5109 9223 3185 22176 8865 22177 22178 22179 12779 9218 10483 22180 16947 12663 16657 22181 1834 9924 6885 16125 5745 13426 13796 3389 22182 14266 22183 4683 22184 7717 17166 14911 12561 14314 22185 22186 22187 3592 22188 15615 22189 7049 22190 22191 22192 22193 3509 22194 7465 22195 6892 21516 22196 11799 22197 22198 22199 10598 3554 5802 11794 16416 22200 17600 12799 17541 10637 22201 22202 445 22203 5186 22204 9213 22205 11796 22206 16629 22207 3785 14844 22208 3761 22209 22210 22211 10667 16583 15195 22212 4055 22213 22214 22215 22216 11923 22217 12681 15394 841 22218 17640 22219 9458 18402 18319 22220 22221 17062 22222 480 22223 174 4712 22224 12685 22225 12706 22226 22227 22228 3991 12689 18010 4292 22229 6478 22230 10646 5625 12692 19795 4347 22231 22232 6470 3679 10582 8214 12693 4707 22233 22234 15280 10648 18513 22235 4288 18676 22236 5854 22237 22238 18680 1229 12708 22239 8986 22240 12113 10590 22241 22242 12702 12989 18589 10422 13995 4359 18815 22243 22244 8221 22245 17639 22246 22247 19230 10730 16384 22248 1040 22249 8088 10296 22250 22251 1334 22252 9283 9471 12712 22253 3272 16886 18002 6447 4746 1359 10568 12714 16082 1826 22254 19421 19243 22255 12717 1267 17948 12813 12718 4734 22256 2057 19390 22257 7068 19326 22258 10322 22259 22260 20034 11532 22261 20324 10289 4125 19231 22262 22263 22264 22265 7090 22266 20557 6165 20235 19053 20372 10740 22267 7786 17761 22268 20515 5894 22269 22270 22271 22272 4759 20664 20673 20746 22273 22274 22275 22276 12735 12360 22277 22278 11592 545 11080 22279 21554 22280 22281 10605 22282 16071 22283 22284 22285 22286 22287 22288 22289 20822 22290 10615 546 22291 22292 22293 10621 4764 6241 19430 22294 20987 10627 22295 21556 7453 22296 22297 22298 22299 22300 22301 22302 19539 22303 11808 22304 21559 15325 22305 8823 10669 6818 17073 22306 21596 18156 10587 21603 22307 12260 22308 21261 10642 22309
161 54 13077 22310 1070 103 22311 22312 7229 22313 1353 967 22314 22315 22316 1073 22075 167 679 9099 5662 1435 1975 22317 22318 2014 90 7387 22319 7402 10180 4916 80 22041 1101 175 11356 22320 2022 12869 5987 12592 7401 6046 22321 7403 12866 7390 22322 101 22323 7396 22324 968 7269 9342 79 1226 12876 171 7502 5691 22325 5989 6648 4938 22326 22327 7228 22328 22329 22330 2251 2122 22331 2205 4610 22332 22333 12890 22334 2115 21992 22335 22336 12901 1109 1017 22337 12892 220 22102 22338 14258 2271 7840 22339 7652 22340 7404 6742 279 2336 22341 22342 6085 22343 2362 22344 6048 260 12247 5102 22345 22346 11985 22347 444 2464 2406 22348 1115 22349 4606 2652 22350 14712 11986 1018 22351 22352 5365 6933 22353 1155 11992 12452 10789 12188 22354 5315 5800 7322 1250 11993 22355 5252 12919 2616 22356 2223 1140 22357 22358 22359 3878 12920 12894 22360 22361 2679 3406 6095 5087 10217 16464 16068 12526 2569 2966 7448 12529 7341 15849 2840 782 5116 2695 3028 22362 364 10251 1254 22363 22364 2340 22365 22366 10244 1934 22367 22368 3506 22369 6124 21920 3160 22370 22371 22372 22373 16494 22374 22375 10138 3334 22376 22377 22378 4660 3247 3360 22379 22380 3354 6145 22381 22382 3174 22383 3355 22384 3384 17128 3329 3158 22385 22386 22387 22388 4052 3655 1185 10729 7369 22389 3727 22390 3712 3606 4709 3831 22391 3711 22392 3833 22393 3832 18007 3640 3501 22394 22395 1474 22396 3841 681 22397 22398 6474 22399 975 22400 4183 4232 22401 22402 22403 22404 4233 7462 4231 22405 4382 22406 4237 4401 3723 12860 4731 22407 22408 4253 22409 22410 4541 22411 22412 22413 1233 22414 22415 22416 19547 22417 19132 19174 19288 22418 4743 4502 22244 22419 22420 22421 22422 22423 22424 22425 19555 22426 4479 22427 22428 6484 3477 21966 22429 22430 11527 22431 22432 22433 22434 21383 22435 22436 22437 22438 22439 22440 22441 22442 1275 22443 22444 22445 11544 20150 22446 22447 22448 22247 22449 22450 22451 22452 4761 6165 22453 22454 22455 22456 6399 22457 22458 22459 4747 20689 22460 22461 22462 22463 359 5713 22464 22465 22466 22467 22468 22469 22470 22471 22472 22473 22474 7098 22475 22476 22477 22478 22479 22480 12837 22481 22482 6490 22483 12730 540 22484 22485 22486 1301 22487 22488 22489 22490 22491 22492 22493 22494 22495 6211 6267 22496 22497 22498 22499 22500 1316 22501 11105 547 22502 22503 22504 6839 22505 22506 22507 22508 22509 22510 22511 22512 22513 22514 22515 22516 22517 22518 22519 22520 6213 22521 22522 22523 22524 10103 22525 22526 22527 22528 22529 22530 22531 22532 22533 22534 22535 22536 6247 22537 22538 22539 22540 6234 22541 22542 22543 22544 22545 22546 22547 22548 22549 22550 22551 22552 22553 22554 22555 1340 22556 22557 22558 22559 22560 22561 22562 22563 22564 22565 22566 22567 22568 22569 22570 22571 22572 22573 22574 22575 22576 22577 22578 22579 22580 22581 22582 22583 22584 22585 22586 22587 22588 22589 22590 22591 22592 22593 22594 7908 22595 22596 22597 22598 22599 22600 22601 10396 22602 22603 22604 22605 22606 22607 22608 22609 3600 22610 22611 22612 22613 22614 11607 7321 22615 22616 22617 22618 22619 22620 22621 22622 22623 22624 12849 22625 22626 22627 22628 22629 22630 22631 22632 22633 22634 3405 22635 22636 22637 22638 22639 22640 22641 22642 22643 22644 22645 22646 22647 22648 22649 22650 22651 22652 22653 22654 22655 22656 22657 22658 22659 22660 22661 22662 22663 22664 22665 22666 22667 22668 22669 22670 22671 22672 3599 22673 22674 22675 22676 22677 22678 22679 22680 22681 22682 22683 22684 22685 11616 22686 22687 11166 22688 22689 22690 22691 22692 22693 22694 22695 22696 22697 22698 22699 22700 22701 22702 22703 22704 22705 22706 22707 22708 22709 22710 22711 22712 22713 22714 22715 22716 22717 22718 22719 22720 22721 22722 22723 22724 22725 22726 22727 22728 22729 22730 22731 22732 22733 22734 22735 22736 22737 22738 22739 22740 22741 22742 22743 3657 22744 22745 22746 22747 22748 22749 22750 11612 22751 22752 22753 22754 22755 22756 22757 22758 22759 22760 22761 22762 22763 22764 22765 22766 22767 22768 22769 22770 22771 22772 22773 22774 22775 22776 22777 22778 22779 22780 22781 22782 22783 22784 22785 22786 22787 22788 7931 22789 22790 22791 22792 22793 22794 22795 22796 22797 22798 22799 22800 22801 22802 22803 22804 22805 22806 22807 22808 22809 22810 22811 22812 22813 22814 22815 22816 22817 22818 22819 22820 22821 22822 22823 3397 4164 22824 22825 22826 22827 22828 22829 22830 22831 22832 22833 22834 22835 22836 22837 22838 22839 22840 22841 22842 22843 22844 22845 22846 22847 22848 22849 22850 22851 22852 22853 22854 22855 22856 22857 22858 22859 22860 22861 22862 22863 22864 22865 22866 22867 22868 22869 22870 22871 22872 22873 22874 22875 22876 22877 22878 22879 22880 22881 22882 22883 22884 22885 22886 22887 22888 22889 22890 22891 22892 22893 22894 22895 22896 22897 22898 22899 22900 22901 22902 22903 22904 22905 22906 22907 22908 22909 22910 22911 22912 22913 22914 22915 22916 4048 22917 22918 22919 22920 22921 7956 22922 22923 22924 22925 22926 22927 22928 11866 22929 22930 22931 22932 22933 22934 22935 22936 22937 22938 22939 22940 22941 22942 22943 22944 22945 22946 22947 22948 22949 22950 22951 22952
162 54 22953 718 13503 1792 22954 1642 10790 22955 7478 22061 6918 1365 1379 22956 22957 5692 22958 820 12011 22959 5110 8252 15199 8379 22960 445 10182 22961 22962 4997
163 54 5347 5725 7212 13395 13166 22963 22964 22965 8059 4895 1557 5477 7520 12300 22966 11329 733 5492 1925 81 1164 13077 1079 5483 4553 22967 13074 4919 986 6729 22076 22077 13212 22955 22968 7252 716 22969 22970 1042 22971 726 22972 22310 1054 5480 167 7236 7519 22973 7388 7515 22974 22975 6619 2005 22092 22976 22977 5983 22085 22086 8343 2068 7196 22090 1914 22978 22979 22980 22981 430 6534 10706 22982 22983 7211 643 1402 5468 22984 22985 1554 8319 10142 22986 22987 954 7228 196 7787 22988 14 6535 7999 604 22989 22990 6905 7994 22991 10850 22068 22359 22992 22993 22994 22995 22996 22997 22998 7726 662 22999 23000 23001 23002 7225 432 7209 23003 435 6536 23004 23005 23006 23007 23008 23009 23010 8 23011 7514 23012 23013 7725 8384 8315 23014 23015 23016 23017 6537 11437 23018 23019 1694 23020 23021 11631 13085 23022 23023 23024 8322 23025 23026 23027 5440 8935 7995 23028 23029 5729 23030 23031 23032 23033 23034 23035 23036 23037 5357 23038 7241 23039 6506 1095 8445 8274 8275 23040 8832 8829 8834 23041 5476 6076 341 23042 23043 23044 23045 23046 23047 12264 23048 23049 23050 1191 5970 23051
164 23052 54 13077 8472 90 23053 23054 344 2064 1601 5462 8 654 23055 120 1573 2056 23056 2136 23057 4990 601 1014 23058 12092 1720 136 5987 23059 23060 23061 179 606 4938 23062 1384 23063 22325 12266 6827 1405 337 12219 23064 23065 6462 23066 23067 23068 11644 168 679 8460 23069 103 1368 23070 5370 23071 23072 23073 23074 23075 23076 192 4830 12443 23077 2365 23078 22336 75 10835 9663 7275 2333 4610 12480 55 1379 220 14158 1066 1112 431 2291 7839 1770 666 8385 9309 5984 4998 7199 23079 1293 1656 9365 6085 268 14408 1237 5466 1031 11636 6789 2431 167 171 1125 1108 12449 7254 13083 23080 2932 6773 23081 6349 2560 310 23082 1018 11993 23083 5036 359 12144 23084 23085 2441 3506 17442 5713 6400 17776 1793 175 5648 23086 8865 6895 23087 17856 12794 8210 17979 23088 9223 23089 19760 4178 23090 12114 857 5853 4487 8984 863 8221 4223 23091 10305 8997 23092 23093 10310 881 8578 23094 23095 8998 23096 6182 23097 23098 23099 918 23100 23101 23102 23103 6265 23104
165 8391 640 4557 3978 725 8310 21610 21666 23105 23106 23107 23108 12081 23109 4647 2834
166 23110 23111 23112 23113 23114 23115 23116 23117 23118 23119 23120 8798 6557 5339 5017 23121 8395 1601 435 23122 23123 23124 8391 5228 8340 5481 8777 5511 23125 23126 23127 23128 8724 23129 432 23130 23131 703 23132 23133 23038 8388 23134 8732 23135 23136 23137 23138 23139 23140 6051 4997 23141 14211 23142 5461 6510 14697 6570 23143 14459 23144 23145 23146 23147 23148 3468 23149 11915 4135 23150 23151 12808 23152 11868 6359 22982 23153 641 10160
167 23154 23155 23156 8532 21974 13345 576 7660 8920 16580 15176 4430 18780 23157 23158 18642
168 23159 21480 11999 10958 13643 8682 23160 23161 10611 17582 17775 17706 23162 18129 4370 23163 23164 23165 23166 23167 23168 23169 23170 23171 23172
169 1931 23173 10859 2749 23174 7168 23175 12026 8844 1201 23176 23177 776 5354 10985 680 1915 7776 23178 23179 12279 8567 1672 7214 1933 5361 6499 10757 1057 7236 8297 23180 23181 23072 8898 23182 5335 742 23183 5359 23184 4892 2076 1882 1009 716 103 724 12032 779 715 8466 23185 720 22955 8476 23186 7996 5958 23187 7520 5492 23188 23189 5581 5615 23190 23191 23192 23193 23194 10781 4895 9570 23195 23196 10776 8289 718 12288 23197 8746 5589 8822 8752 8754 8751 5377 8049 12343 3297 7276 8776 8775 11358 23198 2773 8744 23199 11659 23200 23201 23202 23203 23204 13345 1802 622 9610 23205 9342 5820 23206 7142 572 4944 1601 13381 9595 5397 726 23207 2056 286 23208 23209 12595 986 22990 13335 23210 23211 23212 23213 4984 23214 8300 2022 11352 2133 10813 12233 29 367 9639 8502 13691 372 9653 9676 23215 4606 23216 9644 12040 5379 23217 990 2122 11357 11350 23218 8296 23219 44 23220 7151 164 4958 8003 23221 9631 9635 5506 23222 9617 8493 8507 8513 9351 8291 23223 1423 13868 22330 4963 11547 13779 13799 23224 171 8517 23225 23226 13915 9663 7854 136 2205 23227 8786 945 23228 1507 23229 23230 686 9668 4614 11361 4599 8813 4992 1891 12048 335 1994 10163 96 11306 2314 5584 4982 6687 12057 6720 23231 21980 995 7159 2238 6020 10469 8790 14084 23232 704 23233 9982 204 6015 6508 12878 6509 713 14065 337 23234 23235 23236 23237 11950 9321 23238 7331 12217 5596 9730 12349 6528 14 192 699 1579 12072 23239 2243 13876 9692 13903 23240 1109 23241 685 143 23242 23243 2277 23244 23245 7429 14044 2165 23246 14115 2283 11364 5530 2194 6043 4998 7445 2295 6735 2276 14177 3067 23247 11367 23248 23249 13940 23250 23251 1625 2115 13179 23252 6375 13956 23253 14088 2237 14030 23254 7163 23255 6351 5540 9725 1431 4815 1582 9204 6724 14272 14106 6736 21851 23256 23081 6348 2360 9533 9722 8130 14397 22263 23257 7174 7162 1017 23258 14439 14424 14369 23259 9736 23260 238 2388 2723 23261 9658 23262 5316 23263 23264 23265 12248 5535 14211 23266 11386 12385 23267 23268 23269 7170 2363 23270 12442 12930 13391 7169 22344 7431 12914 11681 23271 5712 11637 23272 7301 14223 268 12466 23273 1605 5546 12461 5604 23274 12051 14517 5019 9758 23275 12900 6783 5605 23276 7024 1108 12426 14365 6877 9778 23277 23278 5411 6634 6567 6719 23279 7320 12516 23280 2487 11382 5559 23281 23282 14587 23283 9767 8795 11389 2709 12351 23284 7180 23285 23286 7172 23287 21897 8522 7173 23288 7176 9775 12905 23289 23290 12906 2580 9433 11369 11373 2423 12247 8150 23291 3590 23292 14712 1388 23293 11391 8524 11985 669 23077 6781 14773 6917 23294 7862 6780 8799 5042 9822 5315 8530 8800 23295 23296 9432 23297 14987 438 14990 9785 2562 22079 12939 9434 12336 23298 23299 9817 23300 9828 7339 12932 23301 7330 325 1250 2563 23302 15044 7769 11202 348 6090 7324 23303 11995 725 2613 11394 9824 6786 23304 14460 8577 15106 12410 23305 23306 23307 23308 5052 15294 6788 9440 15004 1688 6451 15358 2540 23309 2788 15281 23310 7340 7883 23311 23312 9167 326 8927 5061 2218 12439 1816 23313 8657 11408 23314 23315 2701 23316 8640 23317 15325 23318 1003 8660 15258 9854 2733 23319 23320 12523 23148 8629 5058 23321 15491 23322 11416 10794 8627 23323 2746 2814 13640 2831 9435 23324 15536 7441 23325 23326 9846 8815 23327 11450 9985 11398 10205 2853 12612 11410 2455 7181 15632 8630 8162 10229 7178 15640 220 9616 9833 8631 22156 11458 5063 8538 15684 15462 23328 12599 14989 15668 23329 11406 15265 23330 11407 6126 23331 23332 8599 5087 9414 23333 2606 15759 9860 8597 15751 4673 10559 23334 688 7064 2555 9626 12085 12934 2326 23335 13821 23336 23337 15823 5108 8498 350 23338 2800 7446 1282 2867 23339 5116 15800 23340 5582 15768 9865 4668 11401 12431 23341 15701 14401 23342 15771 23343 5117 23344 8701 3027 12571 23345 5088 5654 2936 8596 23346 23347 23348 23349 5084 23350 13309 9180 23351 23352 11409 23353 2954 23354 3323 23355 13686 23356 5086 16035 12527 10249 1820 16000 23357 23358 1814 9413 14168 10246 15977 23359 14554 23360 364 15253 3268 23361 23362 3004 15702 5095 15894 15990 15919 3031 11438 8824 12555 23363 16073 6830 6871 9847 5250 23364 23365 2887 3076 15991 23366 23367 23368 23369 23370 7179 121 23371 12600 8819 10250 23372 11748 10252 11 23373 12943 23374 8823 23375 23376 23377 23378 8554 5597 23379 7358 9448 23380 21917 11424 3118 784 23381 3333 2977 23382 12400 23383 23384 23385 8951 23386 22366 23387 23388 16361 11419 8381 5114 23389 8543 23390 23391 16360 23392 23393 11427 8274 7360 12959 1138 23394 232 23395 23396 16081 23397 23398 23399 9912 16383 6136 23400 12894 11430 23401 7182 8275 8545 16504 6395 7053 23402 6731 16558 8930 3125 23403 12103 23040 4683 23404 3239 1172 23405 4682 9456 23406 9907 382 16682 8561 4684 12163 23407 8958 22374 6582 8066 6708 11421 1962 4687 6899 21925 23408 3208 1603 23409 1563 6580 3224 23410 11512 22261 1546 1559 22171 16585 23411 23412 4688 11928 3237 6581 23134 21929 15914 16804 1592 4976 5136 1541 17637 23413 5146 6902 1574 16890 16779 23414 6763 3130 16789 12572 8808 4693 9221 23415 23416 23417 23418 6602 23419 16883 1555 10264 3226 23420 8112 23421 23422 17057 23423 17065 23424 23425 17073 23426 3317 23427 6884 17056 9454 3494 23428 23429 3207 12956 23430 23431 1252 8563 3429 11435 23432 23433 23434 6885 12581 7858 756 8960 23435 23436 803 22083 3465 3367 22380 7057 7056 23437 23438 3383 9952 12109 23439 3385 3476 23440 23441 13505 23442 23443 22385 23444 8964 984 23445 8183 11441 23446 23447 23448 23449 23450 9463 17312 23451 4281 22120 23452 7455 480 23453 3447 23454 10267 23455 23456 23457 22132 23458 10021 3530 8207 18751 23459 3463 13110 3499 3522 17492 23460 7065 23461 5791 7788 3685 11431 23462 8574 17495 23463 3540 23464 23465 11455 17547 23466 23467 17462 3586 5225 17059 23468 23469 23470 3571 3824 8191 3740 3619 3742 9465 23471 23472 23473 17025 3836 22215 1840 23474 11466 3642 23475 3516 21522 23476 3704 23477 12794 23478 23479 23480 16846 5171 3683 23481 23482 3072 23483 3821 23484 12797 23485 17828 3730 23486 18001 5790 11433 3854 23487 19323 12804 23488 23489 3863 23490 23491 8584 18074 23492 18251 11508 12977 4019 23493 18156 4720 22217 3961 23494 10578 18118 11483 22351 4026 6196 23495 18403 3954 23496 18404 10584 4059 7080 8213 18109 10590 18350 1256 17461 4264 10591 23497 4262 23498 23499 4244 23500 23501 3810 4255 17459 23502 23503 23504 4220 3911 23505 23506 18685 18643 6341 23507 18786 3698 23508 18823 4420 8585 18840 4457 23509 12808 23510 4452 18901 23511 4492 9937 8190 17620 23512 23513 23514 22246 23515 18985 5232 1782 5233 11484 18381 968 1687 8731 10457 4502 23516 19183 23517 23518 8088 12992 19204 7103 23519 19133 2406 19306 19236 7183 22005 19422 12356 9276 19430 12355 23520 5258 23521 23522 19559 4729 19539 23523 23524 23525 11816 9471 10568 23526 9473 11593 19468 19699 975 1636 23527 23528 1224 23529 23530 11527 23531 1253 20005 20072 19878 23086 20068 21234 20070 23532 23533 23534 19979 23535 19901 20418 23536 18352 1140 23537 13156 10576 23538 20109 23539 23540 22268 23541 23542 11524 23543 23544 23545 22270 20323 12359 16461 17434 23546 23547 20294 9288 20465 20329 23548 20487 11566 20503 23549 23550 20478 10298 8990 12362 762 23551 9481 23552 23553 9249 23554 23555 11548 23556 19058 20338 20830 20888 8269 8546 13030 23557 7468 20976 23558 4905 2260 20987 6890 23559 23560 12154 23561 23562 21003 23563 11514 20560 2376 23564 10699 21139 23565 23566 23567 23568 21164 23569 10341 11557 21096 23570 12837 21261 22011 12916 12361 23571 23572 3348 22336 23573 23574 23575 23576 10605 23577 23578 23579 10540 21004 12364 23580 9484 6223 23581 21092 10118 23582 23583 22016 11558 6179 23584 23585 23586 23587 11529 23588 4874 23589 12235 11568 9479 23590 23591 23592 1780 23593 5948 23594 23595 22297 4770 6324 23596 22113 7746 23597 23598 6083 23599 23600 23601 21410 22022 23602 12257 8004 8018 9487 23603 10388 23604 23605 23606 10397 12258 23607 10381 23608 23609 23610 13046 13056 23611 6246 23612 23613 23614 23615 23616 23617 11602 23618 23619 23620 23621 23622 23623 7894 23624 11611 2949 11613 23625 23626 23627 3563 23628 23629 10662 8 23630 23631 11609 11837 23632 23633 9492 23634 7470 23635 23636 11612 23637 10701 23638 23639 23640 23641 23642 12372 1736 23643 7971 3386 23644 413 10793 23645 1927 23646 23647 8729 6806 8781 10706 7141 5380 23648 7146
170 21 21807 5356 7996 23649 5435 12029 23650 71 1884 5361 9564 615 5943 554 23651 23652 23653 5411 23654 7245 23655 23656 5375 5498 4796 4981 23657 22092 5722 9117 23658 6550 1952 233 1967 23659 23660 23661 2050 2080 2028 23662 12090 56 8066 6567 13559 8899 2066 13556 1974 6628 23663 353 23664 6000 23665 10773 5683 23666 14007 23667 12066 13238 8532 6720 9630 23668 168 13818 13819 223 23669 2234 4922 7859 13854 23670 13736 9683 2029 23671 7741 2205 23672 6037 11981 4610 6708 13997 8892 9920 23673 9431 14352 23674 2175 5730 6056 14119 13917 23675 9728 23676 5520 2258 14084 23677 4985 23678 13859 23679 23680 12517 11976 2308 14451 23681 23682 271 7610 23683 12914 2628 23684 13094 14311 12247 14447 2337 2470 4631 23685 2306 2260 14637 23686 444 9391 23687 23688 14618 5070 3103 7439 14957 14912 5559 12939 5051 268 310 12509 15061 2589 23689 23690 23691 10853 23692 23693 23145 10410 6533 23694 23695 21737 773 1536 23696 8444 10798 23697 2 23698 23699 130 23700 23701 10779 9310 23702 4803 8006 23137 8351 23703 12379 23704 23705 1805 23706 1609 23707 23708 23709 12335 9322 23710 1400 6858 23015 23711 8757 23712 1924
171 23713 5284 12500 23714 5929 9338 23715 1427 1439 1 7726 7290 9317 23716 1412 23717 23718 1423 7261 7243 5441 23719 1976 11673 1948 23720 2491 7775
172 23721 8719 387 7290 1031 23722 8515 5949 1063 1004 453 8721 23723 23724 8720 8711 23725 23726 13983 8872 23727 6143 23728 16214 21610 5329 23729 23730 23731 23732 8722 8391 23733 669 504 1745 6887 23734 23735 5466 23736 10791 1787 6448 23737 23738 8534 6942 6544 23739 23740 23741 8061 5767 1792 23074 23742 5641 23743 1311 5648 12991 1770 5225 23744 23745 1456
173 21859 5588 9566 5578 9027 8019 291 9026 5433 13278 23746 2379 6565 13402 13479 6516 2000 21663 23747 23748 11 23749 8051 23750 5591
174 2930 10808 23751 13213 7270 269 23 13576 162 225 12872 8123 8487 8497 13788 660 10809 23752 2268 146 222 10187 23753 4962 6742 23754 23755 14001 276 13379 4956 22039 13584 14254 13862 5248 775 23756 8516 249 23757 23758 10810 14097 23759 13964 7832 23760 15010 23761 10214 14092 3054 14745 13917 23762 58 6518 6932 23763 466 22960 8155 16767 5684 23764 6506 22313 7482 23765 14083 23766 23767 23768 11059 4548 22394 23769 12792 311
175 7208 1006 1915 1417 623 2388 3386 8825 638 23770 23771 23772 12213 8295 8801 23773 7292 658
176 23774 7249 12168 8457 23775 1035 664 21623 1038 8504 23776 557 4051 23777 9332 23778 9417 7253 7259 23779 9365 4586 11676 23780 11197 22118 5305 7229 1007 23781
177 23782 8395 4554 23783 23784 23785 10443 380 11942 1629 4956 5438 1438 2426 1707 1709 1743 23786 1664 10704 11302 3385 600 23787 8461 11340 11982 1736 1063 11923 9423 120 167 3353 659 11901 12479 23788 1653 8918 10439 7731 3 594 4955 8500 23789 374 8460 1975 379 23790 23791 1384 605 2749 527 1647 6069 7404 680 23792 23793 23794 23795 23796 23797 5237 6539 5113 705 1754 23798 171 6624 23799 723 23800 2268 7390 23801 655 23802 4610 23803 23804 12589 8838 1655 2441 6085 5444 986 5712 2388 8516 7129 7170 23805 23806 2114 1790 2374 1257 1090 432 7505 8908 5458 445 1713 8510 1017 1773 2158 5030 23807 23808 8030 23809 6767 21828 21831 23810 5445 23811 14749 1250 9317 1075 1640 1255 8526 1374 7721 5428 6785 23812 1762 23813 23814 6137 1361 5971 3053 23815 5108 5097 7351 5116 23816 11903 13 23817 1254 23818 5250 8434 23819 12944 23820 3207 23821 23822 23823 23824 11956 22356 5436 1363 23825 1008 23826
178 7794 11252 7812 7798 8094 73 11213 23827 7819 7514 22059 7820 7822 8099 7827 12119 149 23828 10848 11220
179 7238 8898 5261 23829 23830 561 22095 12762 9358 1978 1054 7145 22091 23831 23832 23833 12498 23834 629 1087 23835 7259 11628 23836 8458 10708 7325 9335 4586 23837 578 1723 1676 7751 9332 7255 557 1081 7246 23838 4587 23839 746 9354 23840 5311 9366 7290 5678 7273 2072 2151 7268 23841 5328 9351 6036 23842 23843 23844 23845 7283 10451 11346 23846 9189 21611 9199 1433 7281 11361 5515 23847 11666 23848 4619 7294 11673 11671 6056 11676 13746 23849 8902 2192 4624 23850 23851 5540 7308 2615 5296 23852 23853 23854 23855 12232 23856 6050 5786 11681 2356 9387 23857 6063 6084 2388 23858 8536 2677 23859 1118 7328 593 23860 8915 2652 9400 23861 7344 2512 2415 2513 6133 23862 2436 7374 6380 4652 6134 23863 11748 6146 4579 23864 8455 23865 23866 3699 3157 1240 23867 23868 6959 23869 23870 4387 23871
180 8445 5435 5575 23872 7491 5581 1868 6676 23873 23212 23874 7997 674 5498 5369 23875 11353 13378 23876 7984 11200
181 23877 23878 23879 23880 23881 1351 9307 23882 62 23883 23884 23885 725 23886 23887 5835 1899 6991 23888 23889 23890 11 23891 7011 10468 2179 5438 113 10802 23747 23892 23893 2571 23894 23805 23895 778 23896 10464 21927 23897 23898 23899 23900 23901 23902 23903 23904 3 5505 13068 10852 1692 23905 23906 12589 4795 102 23907 12276 280 23908 23909 23910 23911 23912 18305 23913 171 23914 23915 23916 3512 2901 10289 23917 4626 23918 23919 23920 23921 23922 23923 23924 23925 23926 23927 23928 23929 23930 10100 23931 23932 23933 23934 18261 23935 23936 23937 23938 23939 23940 10401 23941 23942 23943 23944 23945
182 9323 8445 23946 1915 23947 23948 4559 718 2072 746 2171 5288 23949 6036 5529 23950 23780 23951 5282 23952 23953 5556 6081 8939 2547
183 23954 23955 23956 652 1633 23957 21625 1698 23958 1796 1668 23959 103 23960 23961 23820 1702 627 1653 23962 23963 11631 23964 23965 23966 1746 8476 1005 1041 1700 23967 23968 8029 10 1655 7332 23969 23970 11645 1781 23971 10453 1671 1147 1442 7383 601 23972 1662 438 11920 5941 23973 38 23974 23975 11308 4938 691 1479 12478 645 432 23976 23977 23041 1769 5642 23978 1675 5668 1017 1782 5466 23979 23073 647 1717 679 1042 23980 23981 5277 1254 7486 8490 23982 220 395 11640 1458 1140 5691 7770 90 23983 136 23984 1063 23985 11929 613 23986 1051 5643 1684 447 1455
184 12323 23987 23988 119 7720 12331 23989 56 10 21654 6076 23990 23991 1957 6947 73 13232 23992 23993 23994 8322 21927 23995 23996 12029 22067 7743 12601 23997 23998 10459 7040 7502 382 7853 23999 23406 8710 12308 6906 155 21805 22007 212 7627 22054 124 959 6908 24000 6501 386 24001 24002 24003 6916 24004 24005 24006 66 24007 24008 5612 8749 8716 7479 24009 6969
185 10422 24010 24011 5396 24012 5958 5484 24013 5492 24014 24015 718 2076 11933 11934 24016 1352 722 24017 24018 8508 24019 10771 12507 732 740 23835 22354 10870 7248 24020 5496 24021 12504 7261 8350 11341 23791 4573 2047 10161 24022 24023 1423 24024 6688 8635 24025 11656 746 24026 24027 24028 24029 24030 24031 23663 8119 4962 24032 13802 24033 24034 6056 24035 24036 24037 4616 24038 5522 11676 24039 24040 1312 4614 24041 6025 5527 8313 24042 5523 12772 24043 24044 8291 23253 24045 22114 5291 24046 8900 24047 12517 24048 4907 6368 5318 6488 24049 2677 23833 11699 13962 5654 5562 11472 9406 10101 23863 24050 24051 24052 22157 10247 1814 24053 12527 7221 9198 15748 23495 9205 7358 11680 7375 10293 8418 24054 16624 794 24055 5745 24056 22175 10261 24057 24058 1174 3891 9218 8959 9227 24059 24060 23444 24061 24062 3343 1053 12098 24063 22261 24064 10268 10258 24065 7371 3540 12283 9285 7050 22385 3527 9235 11457 24066 3622 3687 24067 23565 3757 4713 24068 22203 11760 11770 11481 10730 12800 4009 11475 24069 22229 11503 4384 24070 9258
186 21796 4893 10762 22955 8008 232 2022 9131 12591 24071 24072 24073 8859 24074 12593 23361 23219 24075 23062 4592 13576 24076 24077 21980 6742 12902 8139 6031 12509 24078 12892 1115 5800 1114 5042 23760
187 24079 24080 24081 24082 24083 12121 1496 24084 7274 1715 5490 24085 24086 11901 24087 24088 24089 11692 24090 5487 24091 2944 24092 24093 24094 12223 24095 24096 1355 7751 551 24097 24098 1463 24099 2406 5540 581 8428 1978 2386 5311 1457 7776 8434 1875 23722 7156 2512 1474 24100 24101 24102 24103 3406 24104 24105 24106 24107 24108 24109 24110 24111 24112 24113 24114
188 45 54 106 24115 21737 8262 24116 4892 7500 22033 12171 24117 13213 22 6042 64 5505 4940 118 390 24118 6507 12306 24119 1899 10943 7875 232 24120 1713 90 12314 10796 1856 24121 679 211 6860 11205 8052 237 238 11202 13379 24122 8282 421 5608 24123 242 7984 126 5612 24124 24125 21892 10840 21869 21980 21850 24126 14004 21853 21872 24127 12925 21914 24128 16988 18345 24129 24130 18690 24131 24132 24133 24134 20318 52 6518 22056 672 7188
189 385 5182 24135 22050 24136 716 38 24137 24138 1964 24139 400 24140 5821 527 382 427 6906 5284 24141 24142 397 5044 5113 23814 24143 1701 678 1622 24144 8766 24145 4892 13209 23736 394 682 696 700 10409 10406 7410 24146 5339 121 8322 4792 5490 6929 8869 8870 12871 5453 64 24147 7187 6912 1075 4211 24148 24149 5440 24150 24151 379 1200 22068 1554 978 6828 10 24152 24153 10764 4803 24154 10952 24155 640 24156 659 24157 374 29 7833 24158 155 26 24159 1383 24160 24161 5597 7484 960 6575 24003 114 1607 24162 8550 5470 13085 1405 24163 75 24164 11927 24165 10866 643 5437 5643 8557 24166 987 24167 24168
190 22024 1868 24169 12120 4892 1913 1940 22033 12317 28 775 22035 6518 8486 0 429 44 5 52 10831 24170 22045 24171 551 24172 7198 26 687 9322 24173 8098 22060 24174 24175 6301 7
191 49 1069 13067 3 24176 4892 1063 6806 24177 1916 23106 727 8608 10771 761 1406 161 8537 171 24178 24179 24180 2422 104 2577 24181 8303 24182 7423 24183 24184 5770 24185 23891 24186 13 23894 24187 9190 1427 4408 7000 4074 24188 3771 4639 24189 24190 24191 24192 24193 24194 7849 24195 24196 24197 24198 24199 23390 24200 22449 24201 22722 24202 24203 24204 8283 8068 388 24205 24206 24207 24208 40 24209 21624 23023 393 73 24210
192 49 132 24211 687 8039 6909 418 12305 10940 721 77 24212 1014 22058 17 7023 13917 24213 105 24214 971 14555 13922 215 8136 8766 8764 164 8125 12474 72 5643 24215
193 24216 24217 6314 24218 24219 23138 24220 24221 1647 1619 24222 24223 24224 24225 24226 7275 24227 24228 7228 23057 1766 11655 24229 1481
194 3164 24230 24231 21754 7508 716 24232 23900 24233 24234 24235 4892 21749 21697 1882 24236 6886 24237 982 7200 21745 24115 10171 670 12333 24238 24239 694 683 21755 49 52 22 1986 24240 22044 23909 8301 24241 775 21687 9574 24242 24243 10948 418 24244 568 567 21858 131 24245 150 8650 24246 24247 13360 207 11938 24248 8248 23906 3142 24249 2128 8111 24250 24251 24252 24253 24254 24255 24256 21829 6861 24257 24258 5628 24259 24260 3920 23719 13474 2923 4887 24261 24262 24263 24264 21693 7188 2234 12423 9657 24265 524 24266 24267 24268 24269 24270 16964 6296 23905 6706 424 10452 6808 5770 24271 569 24272 2930 24273 7502 24274 519 13588 5751 13788 192 12177 21680 10547 13932 24275 12430 3075 6810 8609 24276 24277 24278 13836 23894 5003 24279 24280 24281 10519 24282 9743 24283 24284 21690 10955 21686 14148 8602 24285 24286 24287 24288 10961 24289 5704 2126 14279 21691 5708 9731 24290 12852 24291 7331 24292 1364 24293 24294 14254 2374 13930 24295 24296 14072 12854 24297 24298 24299 24300 24301 24302 5750 24303 12864 22347 24197 8125 24304 24305 24306 24307 24308 24309 24310 8276 24311 13922 24312 2162 8145 6742 13669 14745 10467 24313 24314 24315 7547 5643 171 8512 24316 13874 24317 14576 6398 24318 14555 8153 6517 14997 24319 24320 15179 24321 24322 24323 24324 12889 21752 24325 8496 22355 2655 15322 22352 23332 14692 24326 24327 24328 12903 14212 2272 2373 15384 9857 7877 24329 24330 23887 11994 23881 8511 23336 14705 15506 15566 24331 14897 24332 24333 15155 8605 15572 14205 15220 13604 5591 14236 15589 21859 12928 2642 24334 24335 24336 24337 138 24338 8255 24339 24340 2590 24341 2419 24342 24343 22035 24344 8612
195 24345 24346 24347 7217 24348 24349 24350 22237 24351 24147 24352 24353 24354 24355 24356 24357 8838 24358 5484 24359 5113 24360
196 24361 23133 24362 7244 9567 24363 366 24364 520 5782 1994 4562 24365 11704 24366 11634 9572 9571 5990 24367 23135 1503 8319 24368 24369 24370 4575 24371 12031 24372 24373 24374 24375 5795 5820 24376 8731 23123 6000 7269 8297 7261 23770 8338 24377 24378 8489 24379 5017 5236 13078 24380 682 24381 8727 24382 5730 24383 2238 23239 7159 24384 24385 23946 5525 12230 4938 6020 24386 24387 6719 10029 24388 514 9351 24389 24390 616 24391 11666 24392 24393 9639 8813 6348 24394 2077 24395 11978 22102 24396 435 24397 615 24398 10927 24399 9328 2285 7164 7174 10456 11297 24400 23079 7165 5332 2122 2317 11369 5535 24401 5316 11370 12244 2423 24402 12248 11383 11373 11384 24403 2723 780 11385 715 7316 12245 24404 23262 11986 12208 13868 8737 11386 11989 24405 24406 11382 5363 8733 24407 2371 23290 24408 8781 5365 24409 1812 1692 22341 24410 11390 24411 7354 5315 9725 7322 24412 24413 24414 6506 23892 527 24415 1376 10432 24416 8371 2616 714 24417 24418 24419 24420 24421 1351 24422 13079 779 24423 11315 12524 1809 12252 24424 15546 10156 2097 24425 24426 11406 10217 8755 2121 2351 24427 8543 16464 24428 24429 24430 24431 24432 1096 3564 398 5441 24433 24434 4956 975 992 24435 2840 5250 24436 10247 24437 1802 22953 364 463 359 5746 439 11962 23370 1815 8572 1424 24438 24439 9198 1916 7320 24440 24441 10872 11776 24442 9205 2977 24443 9204 9167 5375 24444 24445 7375 24446 24447 24448 9978 1819 11253 24449 10251 22369 24450 1831 10875 24451 3506 7474 3160 15853 8726 6395 21920 11421 24452 16416 23381 8952 3079 24453 16385 24454 11308 7234 7151 5728 24455 24456 16499 983 24457 24458 5124 24459 24460 3127 8842 10692 5733 3114 24461 3248 5735 11423 22374 9172 789 12166 3184 24462 24463 24464 1918 3334 24465 7331 22057 3222 24466 22377 4690 12023 9778 7144 17776 1642 5389 10703 3247 24467 3737 24468 6363 6145 7143 4905 16818 12587 994 11966 24469 2021 3217 3182 22380 17128 5754 24470 3354 23055 8824 8123 23127 24471 3331 10264 24472 23236 24473 24474 24475 22381 5755 24476 24477 2808 24478 24479 13112 12338 24480 24481 24482 24483 24484 24485 3484 3355 12662 24486 3405 8964 3384 5438 11412 8837 3550 1370 24487 21677 22182 24488 24489 3289 24490 24491 711 9434 3225 5252 24492 6147 3175 11447 3560 24493 24494 10268 3454 21663 7065 24495 3329 10089 22386 2053 24496 24497 22387 3655 4201 22388 7327 9285 3450 22375 24498 18420 1671 3409 4171 1185 3935 24499 24500 10724 710 12384 24501 7366 3613 8594 3537 11468 3610 24502 24503 3623 3606 11988 1095 24504 24505 3198 4105 9237 7295 24506 24507 24508 21519 24509 3505 11469 24510 24511 3607 4713 3712 21521 24512 9211 24513 3787 24514 24515 3707 3831 24516 3738 21522 3833 24517 22393 11470 11481 4048 22392 3407 24518 3832 3943 24519 11541 24520 24521 6975 1876 5830 11487 24522 3907 3752 2762 24523 24524 24525 24526 24527 24528 3900 24529 24530 3902 24531 5427 4044 24532 6544 24533 24534 24535 4958 11914 24536 24537 11496 4020 11479 11948 8317 12687 22397 4191 24538 22220 23213 24539 6474 24540 8770 3824 22399 4347 24541 4279 24542 23488 24543 6478 9435 4360 4232 4475 24544 4233 9454 16360 24545 24546 24547 4231 4382 24548 7461 24549 24550 24551 7462 24552 4310 22406 4483 24553 4405 24554 24555 24556 12636 1261 4148 4136 4254 1792 4401 18867 8336 8334 9263 24557 7900 4406 4261 24558 4541 22410 4535 20386 24559 24560 4378 4538 4470 4716 24561 24562 23091 24563 12421 24564 24565 24566 3746 1236 24567 24568 4264 24569 1369 22271 24570 22419 10157 11086 24571 24572 24573 3714 22420 12711 23523 24574 11750 21966 24575 22422 1709 19473 24576 24577 7086 24578 24579 24580 4476 24581 24582 24583 12720 24584 24585 24586 24587 9269 24588 24589 24083 24590 24591 24592 24593 3431 24594 24595 24596 24597 24598 23785 24599 11518 11507 10056 11763 20022 24600 24601 24602 11668 20087 747 24603 11100 23784 24604 24605 21383 11527 23561 22433 24606 24607 9276 24608 22431 20337 24609 6173 1276 24610 24611 24612 8994 23577 1508 24613 20515 24614 1377 24615 24616 24617 20463 24618 24619 19127 24620 11548 22456 19174 24621 24622 24623 4051 24624 24625 24626 24627 10360 9304 24628 24629 20972 22277 24630 24631 24632 22469 24633 7889 24634 9303 24635 24636 10348 24637 24638 24639 1485 21404 11097 22490 24640 11552 24641 24642 24643 24644 22493 22500 10086 24645 22158 24646 5914 22505 24647 10370 23591 22508 22509 24648 20418 22522 24649 22516 24650 24651 24652 24653 24654 24655 22521 24656 24657 24658 24659 24660 24661 24662 12740 24663 11567 22537 24664 24665 24666 24667 24668 24669
197 24151 21473 5750 437 6546 8326 6543 24670 8869 696 6463 6525 7492 686 9404 654 8205 2427 1717 710 712 7642 8720 24671 1798 1550 387 3165 1806 9559 4839 24347 24672 8263 5985 723 24673 24674 5983 24675 24676 24677 24678 1793 504 24679 9927 24680 24681 8402 24682 4998 10895 6474 1639 1045 5866 24683 1683 23036 6275 17657 24684 24685 2944 24686 24687 8718 2733 8416 24688 5115 993 7328 1397 6341 24445 21934 9691 1675 24689 7082 11800 9671 8267 24690 22468 24691 6490 7344 24692 24693 24694 8837 24695 24696 24697 7469 22611 22612 8424 3537 413 1838 24698 24699 4051 24700 24298 4797 24701 8403 23723 6298 21474 5182 5840 4956 5669 1647 7480 8426 527 1676 6315 8253 5837 7504 24702 8723 1104 5838 8361 3819
198 24703 24704 24208 985 24705 24706 24707 574 24708 24709 24710 24711 6397 12150 9991 8901 24712 24713 6376 24714 24715 10720 24716 24717 24718 754 24719 24720
199 8509 660 1685 24721 5343 1164 13187 187 13060 23925 8005 8615 13210 6870 5477 21819 5985 9668 24722 8354 240 24723 18932 24724 8215 10290 8268 24725 24101 1004 9769 24726 7782 5357 6915 24727 1379 23967
200 13061 12169 24728 173 103 12480 5495 24729 24730 24731 23185 6460 5154 24732 24733 24734 24735 24736 24737 24738 24739 24740
201 5655 24741 1624 7222 596 24464 5462 6867 24742 24675 24743 24744 789 24745 6315 24746 1405 8263 4893 1437 5546 2492 23677 5654 6525 6027 2313 1010 4659 24747 24748 13109 10899 12667 3528 24749 23088 17924 4735 2946 9261 2263 864 5866 24750 11083 24751 24752 4428 1413 5983 24753 24754 6196 5985 24755 10368 8490
202 6271 24756 6654 11999 5581 24757 5658 13203 24758 9563 24759 6628 1922 9029 9092 13252 6569 9577 9593 24760 5983 10958 13321 8652 21645 6621 13461 6027 6642 9620 13636 13805 13209 9702 9715 11318 24761 24762 6922 24763 24764 24765 6576 8204 1550 24766 24767 24768 11912 24769 24770 6796 21959 24771 8070 957 24772 24773 1537 24774 3635 24775 24776 24777
203 11013 24778 114 14 11732 6926 22263 22090 23270 24779 15494 13 24780 24781 24782 24783 23339 3522 8960 24784
204 7692 4892 24785 24786 6582 9598 4922 7660 2242 995 7445 23712 14261 14410 6899 14589 23277 8522 12450 445 24787 24788 7439 15026 12514 15115 8161 15546 15376 24789 8543 24790 461 15827 8817 1510 16205 9192 8542 8400 16764 24791 24792 992 16823 3765 5812 17175 19708 19713 23549 20006 24793 24794 1838 21573 24062 24795 22654 24796 24797 24798 24799 24800
205 24801 5433 24802 24000 8755 8040 5368 13395 24803 5442 13166 24804 5481 21585 8000 24805 5415 8004 10783 24806 24807 13242 22990 24808 12378 6289 10242 8006 121 24809 24810 5498 24811 5823 6619 6639 24812 6863 8027 5363 439 6673 7977 13262 6582 24813 12410 24814 24815 24816 24817 13314 8003 24818 8279 24819 24820 8737 1251 24821 24822 4923 22974 24823 1211 1334 24824 24825 24826 8002 2000 23207 9425 2028 5434 16965 24827 5446 1328 432 24828 5101 24829 6504 13472 11627 6684 1987 6877 9668 8115 6634 8108 1330 6925 8777 24830 13380 6648 13181 6629 13300 4950 13692 8025 13255 7218 6584 13701 2093 13795 13573 4945 24831 5989 13818 24832 990 13687 223 9663 13426 4976 13782 9677 9658 6717 6705 13801 13786 13507 24833 8786 24834 24835 5730 6708 8059 4977 13854 13793 14000 9678 6719 24836 6721 13915 4982 995 12154 14084 13434 13619 13796 8788 22199 24837 4993 24838 3234 14118 24839 13540 15430 13838 8791 24840 24011 14088 8130 14311 14388 12914 12963 14458 10209 15911 24841 4323
206 21985 7995 24842 89 1695 24843 8719 23245 172 24844 17 153 154 1215 150 704 23244 1334 24845 1579 24846 24847 699 24823 22088 24848 24826 664 166 24849 24850 7790 6508 186 5687 49 24851 11 24852 76 1687 24853 191 22990 24854 12345 22067 23723 24855 22313 22968 24785 696 11641 24856 24857 644 551 24858 23233 700 21515 23824 24859 24860 24861 24862 608 24863 5444 24864 24865 24866 8326 7791 6546 6525 7789 4924 22040 8766 1330 1106 647 24867 24868 6509 382 24869 8792 972 2325 9155 5686 1094 5987 5415 24870 986 24871 24872 5404 9375 1123 24820 22185 5965 1744 24873 24874 251 6137 9592 24875 1913 24876 136 24877 24878 7458 24879 24880 21622 24881 23728 8056 8722 1212 24882 24883 24884 286 24885 24886 24887 1428 6483 24888 13242 8717 24889 8278 6514 6868 24890 1090 24764 5628 24891 6911 1713 5370 5428 161 6462 6932 5509 12289 24892 4955 611 315 24893 90 24894 8720 24895 13468 13458 24896 1573 725 24832 24897 215 24790 24898 24899 24825 391 11892 5111 24900 23718 24901 103 1623 6375 387 621 11627 24902 1709 24903 171 24904 3353 11665 8742 11888 24905 7390 7976 24906 24907 5237 627 975 673 8012 24908 1643 2426 8572 24909 8798 6631 995 24910 6637 7254 13585 395 7986 4977 24911 2374 4936 1743 4923 1346 9680 24912 5202 13854 24118 2388 24913 12876 6066 1654 5012 240 6085 9758 14712 11910 1251 1746 24914 24915 14157 6126 9817 1140 1084 14354 24916 24917 7272 15185 24918 8486 5041 5505 15187 22207 1634 24919 12933 3 22200 4956 1024 5648 24920 22357 22342 31 120 367 55 24921 619 6497 693 24922 1816 6087 596 6448 4911 2404 1711 5077 10029 1370 220 24923 3207 23445 24924 24782 24925 5102 5014 24926 16965 5066 5577 1121 24927 24928 1499 5017 11297 24929 24930 24931 325 23823 24932 5123 6874 4945 24933 8516 5161 4660 24934 5464 24935 5116 17407 2904 10648 10646 10645 10650 7511 13 7476 7321 24936 24937 6893 6123 6885 12668 7478 24938 24939 1252 12794 1636 7215 12808 8490 5208 4653 24940 1075 12949 683 24941 10651 19137 6895 473 24942 21972 640 607 24943 6794 474 407 8339 5337 24944 11917 628 24945 10190 24946 24947 389 12377 24948 24949 7977 22246 24950 22215 890 22284 5381 18028 24951 1063 12195 2105 7364 1337 24952 24953 8896 24954 976 22270 723 12919 1975 8088 19986 24955 12935 180 9471 24956 2441 24957 10590 745 24958 20987 4337 4455 400 23469 24959 24960 1646 10576 3564 10605 23609 23580 2560 23455 11088 1256 24961 20693 5784 10601
207 7531 9075 24962 6272 34 24963 2131 5636 24964 13172 24965 9054 9032 24966 13269 10854 8465 9591 24967 3165 11999 23 7538 10877 13360 13361 10958 13351 8674 8652 1955 13460 13535 8760 8676 13725 11023 13643 24968 14002 14037 14680 24969 24970 24971 24972 24973 24974 24975 24976 24977 24978 24979 24980 24981 24982 24983 24984 24985 24986 24987 24988 24989 9061 7002 24990 24991 4797 9787 24992 7867 24993
208 120 6076 22963 776 21584 5437 23702 24994 21977 6586 5643 24995 24996 735 8879 4559 23541 24997 24998 24999 25000 10871 7501 7835 5973 13314 25001 4881 7230 25002 2987 25003 685 4942 25004 25005 7778 13541 7431 25006 7751 24936 11954 21901 4938 1767 24726 25007 25008 25009 8502 21837 25010 25011 13362 9307 25012 10457 25013 25014 25015 6293 24860 9677 25016 21992 10834 14023 5286 25017 25018 25019 13700 25020 9736 25021 5365 8705 22359 145 17414 23695 25022 7785 9382 25023 10838 8465 25024 8504 6827 5466 1797 8 4054 7507 23976 10937 25025 6589 7250 5374 1770 7640 25026 25027 6904 1796
209 6667 5434 5615 8780 25028 5435 7803 12333 23051 7386 25029 1871 7874 5579 105 566 5821 7873 106 8040 5467
210 8318 21792 4788 24768 21501 25030 25031 10430 25032 11947 6810 25033 1798 21749 8356 13062 25034 2410 1682 25035 13057 3110 25036 24501 6060 25037 25038 1370 5964 23036 8261 22953 11890 21934 25039 673 25040 10411 25041 25042 25043 437 2521 25044 25045 74 21639 25046 1539 693 25047 8326 11877 6549 25048 13101
211 7476 23806 24826 25049 25050 10426 25051 8347 25052 1458 6548 25053 25054 25055 4796 4911 25056 6568 8047 25057 7517 25058 6631 8371 13706 12877 4968 25059 6634 6877 4938 168 625 13859 22104
212 24445 1364 8499 7156 1654 527 4562 8340 25060 1905 1034 24093 1402 8388 1649 8391 1792 1462 4938 432 7995 25061 1486
213 25062 5575 5481 5346 5355 7015 13181 439 1557 4897 6703 7996 1925 13202 25063 10760 8102 6729 25064 10438 986 6619 6565 121 6570 10929 4907 5823 8778 5584 13266 1974 2002 8109 8756 12337 25065 22974 6571 13286 11940 6513 4923 13312 726 1352 6629 8048 6584 9425 6644 251 2028 8042 9590 13344 2054 13378 13349 8764 7399 2044 6602 13385 6601 8282 13370 6718 4930 4932 6684 6622 4935 25058 13435 13422 8114 13482 8762 6674 25066 2080 8115 4937 6620 2079 9636 9622 2093 4945 13542 13556 4951 13488 6733 13577 6634 6636 8777 6677 179 13619 6648 25067 13598 286 8121 8122 6655 13670 9631 13674 3067 13706 7290 6737 13743 1426 990 4968 12344 13760 4952 13793 13784 168 625 5730 13801 25068 25069 6683 6720 22051 6727 13831 6701 4973 13860 13714 6752 6717 6687 6704 13846 13881 13911 13940 6713 4977 9920 4988 9687 4982 13952 6719 9686 14000 6350 6721 995 23241 25070 14065 14030 14084 6738 10716 9743 10193 14159 14177 6735 6351 5001 3234 6734 14150 25071 1582 6789 14313 8130 5008 14349 6775 25072 254 14356 25073 5014 21867 5712 25074 5015 14452 8134 5544 6773 14458 6761 14509 3097 12914 25075 5012 25076 998 6782 15336 8138 6765 14624 25077 6766 14658 25078 14697 2580 9439 23279 6760 5036 25079 7316 25080 6774 14750 14773 6767 5560 14828 3103 7044 8150 6763 12927 7439 14883 9758 14874 8188 14877 14957 8158 5047 3089 25081 310 8152 5041 8154 5043 9432 25082 2602 12352 15061 15053 6779 9934 25083 5052 6785 15186 21903 15072 5058 9817 9846 15188 25084 15201 15258 6788 9844 23311 25085 6902 15358 15325 2701 2757 1816 2648 5066 2726 9842 23148 15432 8164 6934 2759 15526 3228 15513 2826 15462 25086 15452 15490 2853 15558 15593 7438 2888 14451 15618 5077 23329 5022 21908 2879 9448 1826 9444 12934 23341 15823 15832 9865 15800 15769 21910 25087 5088 5084 355 15948 15999 25088 3244 15816 25089 16069 9476 16081 8169 3009 15896 9445 6871 8823 3072 3076 3066 5103 16195 3016 21673 16188 22163 9449 16311 16273 12944 5114 16354 6938 25090 17530 25091 16240 25092 16387 9893 3004 16441 3282 6876 25093 7053 16564 5123 12947 5129 3208 25094 16682 16715 8871 7069 6882 16757 16794 3237 5138 16836 16890 5752 3272 16716 10723 17060 24956 3233 16947 9933 17073 963 6890 3494 16784 16781 25095 17275 17134 5155 23434 17166 17123 3274 16657 7047 17254 3450 17253 3452 3574 8183 17303 5794 3572 17185 8207 6892 3423 25096 23454 17378 25097 17371 17527 8190 17449 17599 5161 25098 3685 3573 25099 3638 9465 3641 17642 3740 8191 23475 5168 17753 3669 23477 23479 17804 12673 7061 5171 6898 3785 17915 17926 17925 19575 6897 17708 12804 18031 12681 17572 18156 18159 4059 9466 12371 25100 18251 18242 5187 18295 12706 12803 18403 5206 8208 8213 18384 18388 4036 25101 25102 18412 23515 12692 8212 25103 18438 17933 18511 18571 5858 4244 4369 5209 25104 5208 5857 25105 18769 12797 8219 4457 25106 12700 18764 25107 12701 25108 25109 18840 25110 18765 23512 12807 4493 20300 8221 5867 18965 18897 19048 25111 25112 9470 19071 5233 22005 20577 19189 19182 7103 12709 19212 12111 12989 19305 25113 12712 19052 19430 19443 19421 5258 19428 12355 19539 19544 5259 23521 12716 9471 21529 25114 9473 23526 12722 19707 25115 19834 10577 19835 19843 25116 23530 19986 20072 20354 19984 20109 25117 25118 20212 7090 8237 25119 23545 20313 20358 20415 20465 20487 10594 10331 25120 20673 25121
214 54 14 9083 5658 9027 5353 13188 25122 5636 25123 8623 8624 8621 5622 8625 8632 4210 13245 25124 7028 9100 13285 6949 6980 7010 7417 9036 11015 25125 25126 25127 5182 21645 98 5597 57 150 153 154 166 13228 5629 172 9067 13484 186 191 726 5630 8670 25128 25129 25130 25131 13491 13168 25132 13471 25133 251 9609 3819 25134 387 286 328 8370 13657 13584 6519 13460 25135 13597 432 5623 2166 8677 4956 12183 683 13479 13867 335 8649 25136 25137 10232 25138 14076 25139 14189 13757 13897 11021 11022 13785 14051 14275 7042 14264 11032 14336 225 8381 9031 13215 14515 8861 2374 25140 9758 12 25141 460 14141 9659 9673 5640 13517 8694 7390 5505 14050 9817 13917 13066 9092 13069 2598 15066 9829 2606 1031 6792 9646 14783 9700 9747 9773 9795 8779 11918 15379 13 13123 25142 9865 25143 2985 25144 15560 3104 16095 280 15532 16392 3074 9878 17379 9041 25145 7867 9044 7626 8068
215 54 7472 5159 8491 25146 25147 25148 10857 8605 25149 5438 25150 8119 25006 10763 25151 8593 432 16512 14208 22225 25152 1375 12066 4650 25153 10948 17549 11051 25154 25155 25156 25157 25158 25159 25160
216 54 11208 6860 52 12469 1868 21884 124 24119 7191 22024 12 12131 10798 64 7185 22 25161 25162 149 25163 22045 181 23 4940 125 8104 137 23650 38 118 6827 60 49 10802 68 25164 105 21 151 195 7202 10061 85 971
217 54 6013 556 25165 25166 25167 25168 25169 8377 25170 4784 13264 1556 1600 25171 1562 24360 396 6526 6034 7318 6027 9892 7158 7155 1573 12524 2130 72 13462 6612 2313 2236 25172 13286 7312 25173 10703 6050 9688 7310 6062 5749 25174 25175 5303 25176 9383 2710 7171 11365 9752 7180 25177 25178 5314 6534 2358 24429 23325 15956 25179 12151 9413 8952 12564 25180 25181 25182 911 2373 12158
218 54 7406 25183 25184 12330 24117 25185 8059 8034 25163 12485 4919 653 25186 167 95 7229 70 25187 7203 25188 12171 25189 25190 14 8 25191 90 8652 1269 117 25192 25193 12387 12592 22321 6463 101 25194 12593 618 25195 9367 23070 7290 9351 10451 21611
219 54 21807 1565 25196 1882 6556 5338 5423 6748 5581 25197 4892 5350 13205 25198 25199 25200 25201 1946 8002 6993 25202 13225 12332 10929 6582 13262 6640 775 4923 12476 25203 6861 10442 25204 24442 6673 251 12008 6504 25205 4323 11205 6644 25206 23426 25207 11953 2039 572 13386 5628 13337 7247 13434 2030 25208 25209 1982 12339 5820 4937 8066 126 12322 48 23210 172 5431 7491 1555 215 5383 24011 8729 10954 25210 967 22025 738 8278 970 647 150 23235 12202 10826 25211 25023 25212 43 17252 24120 153 987 166 154 25213 5404 23876 186 25214 743 12467 67 25215 88 25216 8781 6904 132 7033 45 24260 25217 8822 5779 773 9057 25218 5808 9056 42 6711 11665 25219 3019 5607 76 22027 24742 23439 25220 10405 7405 10416 12330 5440 24831 5615
220 25221 25222 6993 24564 13297 24176 34 25223 24143 1269 2016 25224 12480 13296 8651 2114 25225 25226 25227 7471 6914 24994 686 6571 25228 387 25229 9108 25230 1980 8354 820 6929 13406 4941 25231 9613 24844 4997 25232 6722 7429 2176 13567 12937 8554 6807 23994 7427 24772 25233 23689 75 374
221 25234 25235 25236 25237 25238 25239 25240 25241 25242 10427 25243 21793 13194 7501 4881 25244 12752 13199 25245 10879 25246 25247 25248 25249 23908 25250 25251 25252 25253 12307 25254 25255 25256 21781 25257 25258 25259 25260 25261 25262 25263 25264 7528 25265 25266 25267 25268 25269 10418 25270 25271 9042 25272 7529 25273 25274 6429 25275 25276 9584 25277 25278 25279 3086 25280 25281 25282 7565 25283 25284 25285 7531 25286 25287 9066 25288 25289 25290 25291 25292
222 25293 25294 25295 8754 566 25224 9424 6730 10029 7230 25296 24260 7737 25297 25062 8343 25298 7395 1856 25299 2035 8759 23006 4785 25300 25301 7399 572 725 5337 8492 4940 1541 22089 8317 25302 1428 9351 25303 2374 6656 25304 14508 14440 3097 8168 5291 2869 25305 25306 25307 12496 3629 25308 656 25309 12026 25310
223 25311 5339 1890 12320 103 13197 2045 24117 5401 4892 24236 6886 25312 180 8354 25313 21796 8005 6565 12856 9423 7236 13209 25314 121 10755 8051 25315 8750 8652 11665 723 22955 8027 24821 25316 1592 6603 25317 25318 25319 5581 1975 25320 8052 2015 25321 9425 90 25322 25323 621 820 7392 91 10182 6624 9427 4924 13085 6582 6516 6602 12865 8058 7196 8282 25324 21653 25325 9428 8764 7390 1573 6622 5982 4944 679 8982 12873 6569 25031 5399 8066 2011 6637 576 6515 725 12876 8490 2054 4804 6651 4598 395 12879 6573 5153 25326 25327 2079 6658 13736 13719 12877 38 618 25195 13519 2222 6648 25328 6874 2092 25329 13701 25330 6585 25331 4591 2407 624 5730 2142 6708 13893 13 12883 168 25332 25333 21972 13979 240 2268 25334 12860 2246 14102 25335 25336 13089 12894 15312 171 6656 12898 25337 4988 25338 6899 14399 14465 444 25339 640 14476 374 445 388 5030 2406 25340 6767 14675 6763 6785 25341 14975 5012 6722 14582 25081 325 9779 6787 6934 8839 6902 2832 10229 5097 25342 1140 5074 9448 1826 15824 15878 12444 15899
224 23324 10424 8631 23328 25343 25127 105 16 23333 25344 25345 6865 25346 25347 23336 25348 25349 5984 23288 25350 278 25351 23260 22263 23261 23266 12395 25352 23338 23340 13188 25353 13318 12431 25354 25355 23265 74 25356 4785 696 25357 334 7553 12601 12419 12386 25358 7207 23992 25359 354 5597 25360 12480 7695 17 7856 7006
225 25361 25362 5492 25363 1900 25364 25365 25366 9710 5701 2842 25367 25368 25369 24357 24347 4126 5813 25370 766 1310 21590 25371 24355 25372 25373 24358 25374 25375 25376 25377 5522 25378 25379 25380 25381 25382 25383 1498 25384 25385 25386 25387 25388
226 467 25389 25390 25391 23764 21604 25392 5725 6483 24162 409 8732 1371 1365 25393 7224 25394 9150 1374 25395 11941 25396 25397 25398 7434 25399 23152 25400 464 1713 6485 5339 11278 24943 25401 25402 25403 19946 23110 25404 25405 25406 25407 25408 25409 25410 25411 7791 25412 25413 21939 25414 25415 5378 723 25416 25417 21940 25418 25419 25420 25421 25031 25422 6624 13376 25423 6516 7748 10441 24351 6565 12873 6340 7746 23600 25424 25425 25426 25427 25428 25429 25430 25431 25432 25433 6362 7749 8774 25434 25435 25436 25437 25438 25439 25440 13534 25441 13657 142 13694 25442 25443 1890 13872 5681 25444 13912 9145 9701 13835 25445 25446 25447 13678 13913 6678 13981 8649 13597 25448 6051 6680 5439 25449 726 25450 14455 25451 22114 6658 25452 23153 23885
227 25453 8878 10430 8891 25454 25455 25456 7263 5969 4559 25457 25458 25459 25460 11966 25461 1681 8899 735 8898 22107 5944 8375 25462 1429 25463 23661 24538 2374 25464 25465 8465 9165 2722 220 12097 25466 25467 25468 5800 25469 24235 10758 13 25470 711 25471 2889 5312 25472 25473 22205 3337 25474 25475 25476 25477 9250 25478 25479 25480 9252 11324 25481 25482 344 25483 25484 9255 25485 3937 22229 25486 25487 25488 24113 25489 11073 25490 25491 8979 25492 7084 25493 25494 25495 526 25496 7376 8989 25497 11112 19942 4748 25498 2917 12823 25499 25500 7093 25501 25502 25503 25504 12831 25505 7091 25506 25507 6206 3143 25508 25509 25510 25511 25512 25513 1284 25514 10389 25515 25516 25517 11826 25518 7921 25519 11172 25520
228 13412 6387 6272 21790 25279 25245 25278 1562 7529 10879 13914 10889 8412 25521 25522 25523
229 9024 5351 25524 71 13180 9026 5354 13168 13188 9565 9027 5638 12331 6980 10472 9078 12307 5634 7541 13218 10462 282 64 13226 5498 24994 9578 12313 13272 4923 6516 7010 13308 109 13315 7575 13318 9108 9591 25525 13352 13364 9600 2024 3107 13388 13366 9596 13393 6601 13410 1573 13430 13436 7780 13451 25141 13463 12347 2080 9654 12342 9624 6637 9619 9613 6631 13489 13568 6641 13620 13607 25067 9133 9625 9646 4963 13687 9690 9643 13729 13791 8067 13800 6720 12183 23220 6687 9520 6743 13984 9704 14019 13985 25526 14071 2283 5001 14311 444 14413 25527 25528 25282 25529
230 23210 2028 25530 25531 25532 975 1096 25533 2429 13078 25534 19251 25535 1305 4610 25536 25537 10080 25538
231 10973 25539 11216 7793 12123 7796 8075 11209 6410 10975 10990 6436 7814 25540 7828 25541 10993 25542 6417 10992 6419 11225 25543 25544 10979 10994 24704 11222 25545 25546 11229 11221 25547 11223 13227 11874 24994 8077 8037 25548 11226 25549 11805 6416 10996 9589 7804 11230 13287 25550 11227 25551 2012 13342 10995 9974 25552 11228 90 14350 25553 11232 2027 6418 25554 25555 25556 12134 25557 25558 12135 25559 10981 10977 7805 11231 25560 12142 12139 21760 25561 25562 7795 6601 11295 7806 25563 13301 25564 12138 25328 13421 13847 1186 13444 11215 25565 7825 11234 14258 25566 9038 21759 9976 25567 6422 9612 25568 6423 10974 25569 25570 25571 25572 2113 1985 10998 7808 13580 25573 13468 25574 13716 13586 13558 13578 2090 2050 25575 6733 25576 13504 25577 25578 12140 25579 13596 2080 9616 353 25580 10999 25581 14086 25582 25583 25584 25585 2160 25586 14605 11003 5691 4922 14099 25587 25588 23827 693 11001 23068 13840 25589 25590 13759 25591 25592 25593 25594 13771 169 25595 1465 13906 25596 15094 13797 25597 25598 25599 25600 25601 25602 13699 2042 1952 25603 25604 25605 25606 25607 25608 25609 25610 25611 10098 25612 25613 210 13923 13896 25614 11000 25615 25616 25617 22334 25618 25619 13980 13948 25620 25621 13808 12876 13965 2217 2099 13994 25622 25623 21694 2108 25624 25625 2214 25626 25627 25628 25629 25630 14352 25631 14060 13897 25632 9730 14048 11287 25633 204 5387 25634 25635 25636 25637 25638 25639 14105 14126 25640 7510 14089 14050 13779 25641 11289 25642 11283 25643 25644 25645 25646 25647 25648 25649 25650 25651 25652 260 25653 14032 13966 14051 25654 11006 25655 4962 25656 25657 25658 6734 25659 14298 25660 10008 25661 25662 25663 25664 14280 25665 14167 25666 10093 432 10194 25667 22332 25668 14807 25669 12118 14127 14195 25670 25671 25672 25673 14190 25674 25675 25676 25677 14260 6687 25678 25679 25680 4960 25681 25682 25683 25684 9987 14275 25685 25686 14304 14338 14270 14303 7813 25687 25688 6348 25689 25690 25691 23082 25692 25693 11007 8929 12143 25694 11005 274 25695 25696 14514 9991 25697 14446 275 11240 25698 25699 6512 14528 10193 25700 25701 25702 262 9993 25703 25704 25705 25706 8473 25707 25708 25709 25710 25711 14448 11241 9756 25712 25713 25714 25715 25716 25717 2431 6760 11239 14667 14437 25718 25719 25720 11238 25721 14471 25722 14392 14423 13997 5943 25723 6088 25724 14525 25725 25726 25727 25728 25729 25730 25731 25732 25733 25734 25735 25736 14391 14542 14601 11242 25737 25738 14856 25739 14625 11237 14817 14857 25740 299 25741 25742 25743 25744 25745 25746 25747 254 11247 25748 14933 8168 11250 25749 14785 25750 25751 25752 25753 2467 25754 11246 25755 25756 11243 25757 25758 25759 5031 11251 313 164 25760 25761 11252 11245 25762 310 15128 25763 25764 15064 25765 25766 25767 25768 25769 25770 25771 15314 25772 15455 25773 25774 25775 25776 25777 25778 25779 15190 25780 321 25781 15477 9994 25782 25783 15367 15014 25784 25785 25786 25787 25788 25789 11249 25790 25791 25792 25793 25794 25795 15693 25796 25797 318 25798 25799 25800 15598 15539 25801 15507 15391 25802 25803 25804 25805 25806 25807 25808 25809 25810 25811 2544 25812 25813 25814 25815 25816 25817 25818 25819 25820 25821 2519 25822 25823 25824 15906 15856 355 21908 25825 25826 25827 7412 350 16068 25828 25829 25830 25831 25832 25833 25834 25835 10005 25836 25837 25838 25839 25840 25841 23394 25842 25843 25844 25845 25846 25847 15984 25848 25849 2898 25850 25851 25852 25853 25854 16163 25855 25856 25857 25858 25859 25860 25861 25862 25863 25864 25865 25866 25867 25868 5119 11253 16388 25869 25870 11255 16230 25871 25872 11256 25873 25874 25875 25876 25877 25878 25879 25880 25881 11254 16160 25882 16436 16881 25883 25884 25885 3238 25886 3136 25887 25888 25889 25890 25891 16543 25892 25893 25894 25895 25896 25897 25898 25899 16557 25900 16772 25901 25902 25903 25904 25905 10013 16577 25906 25907 25908 16706 25909 25910 25911 16819 25912 25913 25914 25915 25916 25917 25918 3063 25919 25920 25921 23271 25922 25923 25924 25925 25926 25927 23412 25928 25929 25930 25931 25932 10015 25933 25934 25935 25936 25937 25938 25939 25940 25941 25942 25943 25944 25945 25946 25947 25948 25949 25950 3292 25951 10016 25952 25953 25954 3649 25955 3529 25956 17357 25957 25958 25959 17170 17207 25960 25961 25962 17218 25963 25964 11290 17240 25965 25966 6427 25967 10019 25968 1829 25969 25970 25971 25972 17470 25973 25974 25975 25976 6397 24716 24717 25977 17276 25978 25979 25980 25981 25982 17198 11260 25983 25984 25985 8454 25986 25987 10017 25988 25989 25990 17535 25991 25992 25993 25994 25995 25996 17690 25997 25998 25999 26000 17760 26001 26002 26003 17840 26004 17550 26005 26006 26007 26008 26009 17791 26010 3445 26011 26012 26013 26014 26015 26016 26017
232 5351 26018 5627 7608 10883 26019 13256 7611 9063 13231 8645 9033 7677 13269 2131 6415 26020 26021 5434 9585 13326 9024 9107 10885 13175 9109 7613 8649 13376 9112 185 14137 14564 15065 13820 15587 15756 2954 15815 15883 9219 797 9228 17168 9924 17049 26022 9231 26023 26024 26025 15842 17206 26026 26027 26028 5844 17879 7062 3817 3584 17869 21735 18730 19461 17561 9738 18755 11081 19691 19730 19779 26029 20154 18848 17103 18872 18873 18816 26030 20098 20165 20203 20381 20616 20585 20724 21068 26031 21212 21358 17829 21445 26032 26033 20862 21189 26034 26035 26036 8206 4125 26037 20018 26038 26039 26040 26041 21183 23604 26042 26043 26044 481 26045 26046 18231 26047 26048 26049 26050 26051 26052 26053 3450 3531 26054 26055 26056 26057
233 409 4936 5182 6623 4892 5581 5433 10432 5580 26058 121 5584 26059 26060 5370 11665 6626 6911 6513 24905 723 13286 2000 12654 8343 12202 7979 2024 6601 8278 26061 26062 1533 4944 2080 5682 6637 6592 6733 6559 3464 26063 6655 5476 8371 4958 12324 13706 6656 6671 6619 23132 4938 439 13760 3075 4976 26064 8340 432 6687 4930 24002 3629 26065 5442 8399 24763 5789 14018 26066 1925 26067 1871 4948 1602 8388 6724 6631 4943 4939 24376 6734 26068 6735 5001 6514 24912 1582 1979 14286 24764 14311 6789 26069 25072 5541 21867 6753 7170 8860 7997 5015 3097 26070 13749 11305 26071 6714 14445 26072 4951 5007 445 6760 4641 6774 168 26073 26074 6767 3103 26075 26076 13838 6591 10819 11928 4945 3089 1432 7782 12352 4923 5043 8788 310 6899 14827 5014 7150 21903 26077 1585 8739 7860 6686 254 6560 4934 14272 7339 6581 2872 1003 6787 6708 2729 2648 5066 6783 2759 435 15339 15483 26078 26079 5762 8150 3228 5053 24347 15274 5038 15582 26080 15327 4959 26081 15668 5077 5072 15180 21908 6291 6983 6602 2879 26082 26083 5035 5055 21910 15916 15824 22197 9448 14444 26084 26085 4977 355 8066 6751 25089 3009 5095 16073 3084 5099 6871 1574 5076 3066 16195 16136 5069 8130 1601 23380 24438 5381 8115 5090 12418 15462 24930 13670 5406 5114 17530 6763 26086 5530 26087 5125 11744 26088 15753 644 22200 26089 5123 5559 2853 1541 16593 26090 5107 5135 6580 23407 25094 26091 1546 8109 26092 6978 6721 4968 1559 3237 26093 5036 18287 1563 10723 2726 1252 15199 8112 3268 3349 6885 3368 17065 12781 3375 17134 25095 24956 26094 14313 5157 5155 3450 16835 3389 17173 8183 3572 17296 5062 26095 16644 6892 5129 6762 5161 26096 26097 15944 1031 3573 5160 26098 3627 5818 3740 12794 15816 3785 17636 5168 17725 9815 18947 16965 23479 17753 3738 4988 8203 16788 26099 14265 5176 26100 15197 19575 8210 3813 26101 9130 12804 18112 1555 3006 5172 17995 3628 4059 4991 12371 25100 4932 5187 4177 18403 5586 4125 18226 10277 26102 8213 23305 26103 5209 18398 1603 18728 26104 5208 18539 26105 5188 26106 26107 22233 5079 4456 25106 7047 12703 17306 18823 26108 26109 18635 26110 19061 26111 18625 6510 5215 26112 18804 4078 19020 26113 18950 26114 19182 26115 2796 5234 16789 17520 19417 20574 12354 20577 12356 25113 5258 24945 22252 9471 19108 19532 26116 26117 5880 11816 26118 19544 19643 12206 6582 5259 25114 3808 19807 9473 26119 16963 19545 5404 8164 5346 9447 9035 10040 25116 26120 19834 19986 24598 19187 20072 15640 20111 25118 5186 12358 20116 14906 20198 26121 8049 10576 26122 26123 26124 20323 26125 26126 22979 26127 26128 9068 25117 20340 26129 10930 20346 10331 26130 18683 26131 26132 26133 26134 26135 25121 26136 26137 26138 8114 26139 26140 12368 890 24953 10592 20578 19805 26141 893 26142 26143 13025 6890 25111 12926 26144 10605 894 26145 21069 21068 21037 24634 12738 21164 26146 18671 26147 26148 21411 5242 21257 26149 5120 7125
234 26150 26151 26018 4336 26152 9085 24965 6970 26153 26154 26155 7521 26156 26157 25256 26158 26159 10953 26160 9051 26161 26162 26163 25125 26164 9152 26165 26166 26167 26168
235 1332 1628 5670 26169 1647 26170 25231 596 9213 9223 21558 26171 12953 6154 8961 1835 26172 1834 26173 26174
236 26175 9561 5654 12331 6929 13232 26176 9533 5286 23080 14796 8165 24145 26177 12385 23266 5021 16 26178 26179
237 24235 26180 118 8 24280 26181 26182 26183 984 390 26184 26185 5643 22075 26186 7 23805 23060 7502 26187 10468 1075 1402 25344 8839 23882 26188 367 12300 2571 429 165 52 25351
238 1286 26189 1924 629 26190 1352 22352 3369 16824 26191 24059 23673 26192 3616 3692 1190 4713 12633 26193 26194 26195 25505 26196 26197 26198 22271 26199 26200 26201 26202 22528 22304 26203 26204 26205 26206 7132 11147 26207 26208 26209 22657 26210 26211 26212 22854 26213
239 383 6860 659 22024 10950 4892 10947 7189 7540 0 25343 7 12177 1940 10808 723 727 232 58 26214 10172 10811
240 26215 5584 5629 26216 26217 26218 9603 6516 13752 13903 21851 9985 6055 14212 14703 3089 25081 23329 249 16404 16552 16129 16566 10503 10488 16236 14814 26219 16325 17137 14431 15001 17540 17542 26220 26221 18726 18735 19439 19463 19485 19501 19674 16754 17795 20083 20449 20713 23564 26222 26223 26224 26225 26226 26227 23620 26228 26229 26230 26231 26232 26233 26234 26235 26236 12372 26237 26238 26239
241 21478 26240 26241 4791 4806 1763 9558 1971 14073 13495 26242 26243 9599 26244 26245 26192 24136 9606 9942 846 5858 3562 26246 4356 9262 13135 21673 14447 26247 26248 10554 26249 26250 19966 4729 26251 25232 689 19199 20582 20750 12734 26252 12549 26253 18410 26254 26255 12646 26256 4845 26257 26258 26259 23097 26260 20091 1252 12634 463 26261
242 26262 26263 1485 26264 9099 24936 26265 26266 7502 1074 26267 12165 24090 7247 26268 26269 26270 26271 26272 8794 26273 2234 2159 26274 8306 23072 13871 26275 7307 24479 23255 2237 26276 2317 1448 6379 10079 7194 7032 8295 11985 2026 11371 26277 8314 26278 26279 26280 26281 26282 2043 11993 26283 26284 26285 11394 3164 2721 12224 2706 24333 6095 26286 11654 2121 26287 26288 12555 26289 26290 2744 8452 23876 9370 26291 23283 26292 26293 7975 1997 4610 26294 7840 26295 7149 1493 2769 3054 26296 26297 9998 26298 12863 26299 25001 3069 2746 6341 12235 26300 26301 26302 1926 26303 26304 26305 1814 7300 26306 11356 26307 2276 26308 26309 2129 26310 26311 3471 5056 26312 8303 714 26313 26314 26315 3383 3447 23391 10175 9259 3720 26316 21588 11323 25148 4031 7208 26317 26318 26319 12566 4028 834 26320 7372 26321 26322 3943 3618 40 8287 26323 844 26324 4222 26325 26326 2408 11399 2943 4092 12108 26327 26328 26329 8577 22399 26330 26331 22400 1969 3854 26332 4145 3150 7759 6817 26333 26334 26335 26336 22408 10291 26337 22410 8286 26338 4404 26339 669 26340 26341 848 8512 26198 26342 1247 26343 2490 5200 24753 26344 26345 7087 26346 22428 26347 26348 26349 10355 22445 10847 22440 26350 22449 26351 26352 10358 26353 26354 26355 10830 26356 23561 26357 26358 11369 26359 7904 22464 26360 10875 26361 11114 26362 26363 26364 22465 26365 26366 26367 11117 26368 5892 26369 26370 26371 26372 22475 26373 26374 2286 26375 982 26376 26377 26378 26379 26380 26381 26382 12719 26383 26384 26385 22493 26386 26387 7249 26388 26389 26390 7106 26391 26392 26393 26394 26395 1390 26396 26397 26398 26399 26400 26401 26402 26403 26404 26405 26406 26407 26408 11134 26409 26410 26411 26412 26413 22510 22509 26414 12644 2733 26415 26416 26417 26418 26419 26420 26421 26422 26423 3603 26424 26425 26426 26427 26428 11571 26429 26430 11540 22517 26431 26432 26433 22472 26434 26435 26436 26437 26438 26439 26440 26441 26442 26443 26444 26445 26446 26447 26448 26449 26450 26451 26452 26453 26454 26455 4563 23090 12638 22615 8774 26456 26457 26458 26459 2111 26460 26461 26462 26463 26464 22644 11621 22673 26465 11607 22609 26466 26467 26468 10231 26469 26470 26471 26472
243 26473 26474 26475 26476 26477 8526 26478 732 7331 1688 26479 26480 26481 24208 251 746 24024 12386 1569
244 379 380 26482 4554 5471 5493 7145 6912 26483 4895 725 5475 26484 427 9351 6803 13746 26485 1430 4613 10874 25172 25413 26486 23110 5046 14746 26487 1003 1743 9846 4843 220 4614 2560 2733 1049 26488 2805 10962 26489 26490 5252 26491 11741 2409 4088 26492 4213 26493 26494 26495 26496 7487 26497 24505 26498 8030 26499 12360 26500 26501 13004 12539 26502 26503 26504 26505 10123 25454 26506 26507 26508 26509 8483 13072 26510 26511 26512 26513
245 26514 25041 2571 1899 8488 1427 26515 681 1678 26516 26517 10417 8700 24005 26518 26519 26520 26521 26522 775 23156 9131 26523 20368 6069 26524 1727 26525 1637
246 8075 26526 7795 10990 11222 7796 11221 11224 6419 11232 14086 13906 6534 7822 157 6540 6541 11264 11267 11270 25565 11280 11265 11281 7826 7819 11271 8095 11273 10984 8094 7800 7809 11275 21758 11268 7821 7827 26016 7815 7817 270 26527 7828 6438 10983 25328
247 26528 5415 23212 26529 25324 7997 598 5378 5581 26530 26531 9510 24801 13242 986 13166 104 23873 121 4886 5442 1957 26532 6582 6863 26533 8101 8756 4913 7040 6673 10929 673 6571 5598 8048 5500 90 1573 6601 26534 2000 1615 5496 23446 4923 13341 1602 6656 6620 4938 8066 6691 4939 6637 10163 26535 8778 8117 26536 6653 6648 13573 13598 7996 8064 8708 9631 662 13760 13793 8302 6912 644 23210 1585 5368 26537 5404 656 26538 11279 26539 6501 4211 24002 10240 6528 10867 23013 6828 12377 1432 26540 6590 24778
248 12303 7633 26541 26542 26543 26544 26545 12138 26546 26547 20276 26548 26549 26550 14711 26551 26552 26553 26554 26555
249 6823 12657 12658 8447 26556 6340 6084 447 26557 26558 26559 26560 26561 24316 5750 2300 23777 26562 5679 8774 26563 23036 664 23598 26564 26565 1643 26566 12043 26567 8398 26568 26569 26359 13103 5110 890 26570 5752 24481 5157 3423 893 10731 26571 26572 3527 6480 8989 26573 5295 13157
250 5096 1792 26574 26575 26576 26577 5277 9588 5665 1746 26473 7494 10926 24185 387 26578 26579 8261 10476 6128 139 11922 5654 1647 693 26580 26581
251 7975 1937 744 6801 12049 26582 24586 26583 5427 24539 26584 7789 608 5444 26585 12414 26586 26173 26587 605 983 7480 26588 26589 9204 327 9433 14705 306 6777 9693 26590 9434 11993 317 9651 1577 14527 26591 26592 968 527 26593 1374 7167 2439 15356 24347 8697 5407 9167 8814 21610 9435 10797 15287 15621 1431 7064 13459 7031 15196 13 15967 26594 13184 359 462 26595 1954 11414 466 1819 11786 8817 7044 16205 26596 10012 15447 11257 10254 5728 2490 3101 23387 12565 26597 2746 1049 6139 3114 12676 12536 26598 8951 13112 8824 13109 12666 128 26599 3381 26600 26601 11452 22389 3528 3483 3179 1189 8554 11797 26602 23474 9463 26603 26604 26605 11468 819 26606 1744 7082 26607 15177 3521 11067 1221 26608 11506 12680 16079 25111 26609 26610 26611 11097 26612 26613 1267 1247 12719 11126 11091 26614 26615 26616 26617 26618 11070 26284 26619 3623 8456 13101 12579 26620 26621 11514 26622 26623 21793 10886 248 7582 26624 26625 11560 26626 26627 26628 26629 16519 26630 12048 26430 11129 16601 26631 26632 11392 26633 26634 11134 22467 26635
252 778 26636 26637 628 1482 23661 24260 3075 8925 5984 26638 26639 597 5685 26640 967 5471 26641 26642 5661 26532 23816 1642 1724 26643 1657 26644 1424 26645 1677 1448 1224 120 5477 23993 9397 7383 24393 23186 23050 26646 983 26647 5950 24420 26648 54 24402 5276 8842 25188 5482 21627 26649 1683 7210 24140 21470 26650 21621 26651 23656 5307 5362 654 79 6531 1414 26652 23954 1042 26653 373 674 26654 12854 23192 26655 26656 7519 22030 26657 682 722 23648 16 12158 738 26658 26659 1965 603 26660 136 26661 614 11337 417 8013 5297 12040 26662 26663 5516 6049 5538 13554 13434 12517 2443 5028 7778 13423 26664 26665 14828 23313 7138 5043 5315 26666 23431 8960 1176 26667 3574 3343 26668 11799 12669 9246 8968 1174 11051 8977 12794 26669 26670 5811 4270 752 19897 10650 11056 26671 22220 12683 26672 17334 10590 5206 26673 26674 26675 9252 12691 26676 10554 8986 10735 26677 26678 9256 26679 26680 10322 5904 20746 26681 26682 1204 21541 21149 26683 26684 26355 26685 1333 26686 24645 26687 26688 26689 26690 26691 26692 26693 26694 26695 24707 26696 23650 693 23482 23876 26697 26531 26698 5740 2177 7331 979 1777 390 26699 6919 26700 2521 2749 26701 23805 26702 26703 93 23697 1320 5236 23035 22032 26704 26705 26706 1628 26707 25060 51 658 447 6528 23802 982 23672 12169 1757 2426 650 26708 8399 8388 1066 26709 1356 11302 1650 26710 647 694 26174 21476 7720 26711 26712 26713 372 24955 11944 21491 11892 26714 23969 26715 7475 6912 1609 26716 6923 24827 26717 26718 11890 26719 1483 26720 26721 23814 91 6693 26722 23979 5459 7770 960 26723 8011 24351 394 1111 26724 409 26725 1717 24826 7223 24924 26726 652 26727 11644 1322 659 1631 1626 5988 26728 26729 7776 10463 26730 8489 1387 23117 1455 26731 7973 24555 12627 707 8465 1019 26732 12171 26733 1787 1646 5439 24915 1382 1120 1619 1486 527 8886 1672 11640 26612 11308 24891 6499 691 1658 975 377 1701 11678 26734 26735 5432 11204 1791 8836 1062 3353 1106 1730 1621 1004 11661 1198 22093 1641 7220 26736 1633 1662 1687 1661 1671 26737 1625 8131 1211 1705 26738 26739 26740 24792 26741 2923 23976 8831 26742 6347 1445 24929 11782 6495 26743 24519 1442 7773 26744 38 9320 26745 23715 8029 26746 6458 5267 26747 7727 644 26748 24092 26749 8753 5604 26750 26751 5385 10165 11312 379 9404 24718 26752 8774 4956 5202 1367 26753 24427 14734 10410 7504 23741 5329 26754 24505 1432 26755 5237 23073 5654 26756 12499 26757 23040
253 26758 26759 5695 8835 26760 1673 1640 1211 1212 26761 24101 26762 7790 608 26763 26764 6928
254 1013 570 26765 1269 26579 5488 26482 8479 22983 8391 123 10843 8877 8483 8526 26766 8491 1959 1067 611 26767 8787 1684 26768 8615 26769 4555 12860 4561 1012 1428 9359 23716 8508 26770 5964 26771 8375 1071 22082 8862 1427 5709 26772 1798 8537 380 5352 379 12423 23656 22089 575 26773 8058 7402 26774 25190 8490 22316 8007 11351 7262 8032 1423 970 26775 175 9339 24025 1426 2086 3 26776 21831 6637 8532 387 7751 23423 4598 26777 21828 21974 7403 25031 26778 26779 2087 9354 7290 26780 4600 26781 22091 2072 5512 4938 6658 26782 7033 8055 6571 8503 11634 24903 8398 12184 26783 12338 26784 2134 26785 626 6012 2281 2320 4997 2268 26786 820 26787 26788 12769 13711 22283 4626 26789 22108 4605 8502 23079 26790 26791 26792 26793 8788 5750 1566 1028 9372 4619 26794 26795 8923 26796 23853 8046 8041 447 7304 2310 2374 2309 2092 2298 605 5005 14465 6874 442 22118 26797 2285 26798 445 26799 26800 26801 8898 26802 8319 12764 26803 26804 7856 23782 7243 5929 26805 8054 25149 8338 26806 23006 26807 12765 23696 8504 26808 25022 26809 23838 9382 7422 24029 26810 26811 26812 26813 7227 24172 26814 5472 26815 696 22072 5946 26816 5370 26817 26719 25191 21609 23845 23361 26818
255 24589 4892 10174 718 10765 1931 379 5944 1009 26819 26820 23197 8289 1915 26821 11952 1874 742 1926 722 5478 5490 6315 741 6806 7208 726 2412 8891 23600 10787 26822 26823 4564 12654 1911 7142 26824 734 725 551 10204 1919 1897 10781 736 10874 26825 7835 26826 11353 1417 23648 23929 26827 10774 10857 6805 26828 24710 12515 711 26829 10750 26830 10793 8308 4610 26831 26832 23297 23747 5438 975 7012 2409 26665 11384 10758 26833 24745 26834 5316 24509 12210 11985 26835 26836 26837 10480 2563 26306 4700 23447 1818 691 26838 11545 5966 26839 11 7331 8842 1422 26840 26841 26775 26842 26843 26796 23561 1437 26844 12790 6993 26845
256 26846 561 26847 26848 26849 26850 5847 26851 26852 4363 11092 26853 4496 11090 5256 26854 26855 21163 4498 26856 24601 9273 8990 26857 26858 26859 26860 26861 26862 4510 26863 10329 26864 26865 26866 26867 26868 6186 900 26869 26870 26871 26872 6220 26873 26874 26875 7892 26876 6261 26877 26878 26458
257 2413 26879 90 26880 26881 660 8065 8614 572 424 13389 22102 26882 13472 13067 8382 4990
258 26883 11329 26884 5947 1009 22970 1402 8007 26885 9359 570 9163 5654 1424 26886 25383 10455 8363 5990 8635 6870 26887 5483 25034 9355 23844 8058 7139 9340 23838 3448 8615 9357 4576 6044 1423 26888 21608 22091 746 24024 1081 26889 6024 10451 7290 26890 12050 7294 2154 7268 26891 22100 1420 26892 13738 9353 2400 26893 9661 6056 24036 2314 5525 8490 24045 6009 11671 8890 2239 26894 10697 5529 6045 8119 22106 10712 26818 9796 991 996 6033 14250 5647 379 2260 9361 1054 4815 26895 14271 7281 2310 997 22102 5546 2619 10711 6071 2628 2376 23278 26896 5664 22124 26897 1000 26898 2430 26899 6075 25178 8524 14737 26900 9797 8523 26901 9170 9394 2516 12073 5314 2513 7374 1001 1033 2573 2378 2388 26902 6093 4631 9825 2572 6091 2738 26903 26904 2758 2752 9402 2754 4653 15041 26905 2657 2626 8548 7041 5078 2834 26906 22179 9400 26907 5115 12537 22157 24923 26908 22162 13 9872 3323 5556 3015 23364 26909 1039 8546 26910 26911 26912 1814 3113 26913 3559 26914 2553 8561 16629 24103 26915 12570 26916 26917 7994 26918 23420 26813 7489 26919 3470 26920 4668 3345 1176 13107 5094 15749 26921 7065 7848 26922 26923 5771 6153 23036 26924 26925 26926 4898 3469 3409 22203 22210 26927 3570 3692 7449 5799 3702 17895 26928 26929 3686 22221 4710 3699 4712 26930 3886 11775 8455 26931 8975 26932 26933 26934 11481 3718 25870 26935 11324 3921 26936 26937 23494 18080 10493 26938 6478 26939 4226 26940 3912 22161 22229 22247 26941 4360 4729 22244 4359 26942 26943 26944 26945 4740 10298 23539 26946 26947 26948 26949 26950 26951 22271 26952 4202 21542 11995 26857 17035 13156 22265 26953 11532 26954 23917 26955 26956 22268 26957 26958 23554 26959 7993 26960 3052 26961 11592 26962 26963 24699 26964 23562 22286 26965 26966 11113 26967 26968 6469 26969 21392 26970 26202 26971 26972 26973 21559 22309 26974 6523 7458 26975 26976 11121 26977 26978 7753 23595 26979 7384 26980 26981 23617 26982 5964
259 23182 10692 26839 24202 23191 26983 26984 10445 8886 23193 23185 5964 23187 718 23190 8331 5490 24400 26985 1020 22083 23446 724 22966 8375 734 23424 23194 26986 26987 26988 5958 26652 1156 26989 2048 5509 26820 5499 5492 26891 26990 5529 751 26991 12772 26992 26993 26994 9173 6033 11336 10711 5301 5551 5030 9184 24031 26995 2455 2673 8337 5302 26814 3526 26996 1202 24520 18161 22217 11324 4026 9252 26997 4857 9253 10047 4347 5857 8979 26998 26999 27000 27001 27002 27003 20717 27004 27005 25505 8989 27006 27007 27008 27009 23091 21953 27010 12637 12697 4746 27011 27012 23574 27013 27014 27015 619
260 25383 11887 27016 27017 27018 11662 27019 9317 7000 1797 27020 114 705 1009 27021 27022 12405 12625 8526 6531 26816 5471 26815 5468 1411 27023 1020 8488 27024 1086 27025 27026 7737 27027 1405 27028 40 26645 1412 740 121 7210 11635 1426 4944 12336 23298 27029 27030 1085 1413 27031 12400 4938 4598 4899 10 1570 168 7856 432 9173 4583 27032 24849 11306 27033 26769 23299 23300 27034 23023 9631 27035 27036 27037 254 591 1430 27038 8910 4998 8735 7760 5546 1582 4656 2485 4595 4706 27039 23350 4647 3343 1504 27040 12080 27041 27042 27043 27044 27045 4347 4150 22250 12637 4746 27046 4734 4502 4559 27047 11456 12645 12360 22980 27048 22271 1252 12794 12808 3530 27049 4376 3672 7906 2875 27050 27051 22135 890 893 25305 7788 12364 27052 7519 1022 1222 11503 4591 5536 10697 1180 3177 27053 27054 26101 894 27055 27056 20746 24139 13368 27057 4764 27058 3305 22335 27059 25110 2800 7786 27060 27061 27062 27063 27064 27065 10388 27066 27067 770 3464 23579 27068 6057 27069 8004 16510 27070 8018 27071 27072 13540 12373 9023 27073 23525 6715 27074 632 649 1097 658 5453 21957 27075 10155 1533 1409 27076 23696 27077 1425 26802 27078 7730 12324 27079 621 1102 10273 1010 982 601 27080 5950 6528 650 656 27081 779 10160 27082 382 26725 27083 5319 27084 27085 27086 664
261 6427 6439 11265 6426 11291 25670 6430 14338 14395 25698 323 10124 27087 27088 27089 12128 7814 11272 11290
262 606 7990 1069 118 5684 5336 7410 5476 687 27090 8899 27091 10750 1551 27092 662 102 1
263 54 27093 646 1066 27094 1684 11302 1665 5247 27095 27096 27097 1629 4902 1635 1642 4903 2749 3670 1700 1648 27098 6030 27099 12169 27084 1688 1438 2426 22990 27100 5202 1739 11202 26823 1707 27101 27102 27103 980 669 1744 23077 1686 432 9613
264 5965 27104 1361 27105 647 1094 27106 1427 4947 1207 1 21878 1232 12902 14115 23255 21626 1469 22093 27107 27108 22314 27109 1082 27110 119
265 8614 9385 21683 4792 5837 27111 4820 24677 11998 27112 10425 1937 1936 5947 9559 27113 27114 27115 27116 24280 27117 27118 27119 27120 27121 27122 27123 5739 27124 5974 27125 27126 27127 9341 27128 13281 11779 27129 24966 10778 24184 23128 11924 8330 27130 27131 2191 7392 24289 27132 25031 27133 24921 8428 5709 7214 27134 5236 27135 27136 13324 23816 2023 13107 27137 9668 12913 24183 27138 2232 27139 27140 8255 424 27141 27142 23061 4794 13567 24178 13078 27143 27144 27145 27146 24115 27147 2117 27148 5829 27149 6284 128 24250 7914 9378 23074 8676 13321 24303 12882 2234 27150 12592 3353 2163 6517 27151 27152 440 21980 13474 2176 7471 27153 10519 27154 576 27155 27156 2220 25360 11636 24768 22330 13874 659 27157 25351 13917 13461 8792 13441 27158 6002 26732 775 27159 27160 23787 14096 12881 6823 9663 8125 23076 12865 27161 13992 12868 23792 13307 27162 8870 7877 12871 27163 975 10936 27164 27165 8496 27166 22109 13811 12887 24339 13780 747 10469 7429 21668 4775 23754 27167 27168 27169 13903 11027 27170 27171 18 27172 5631 4898 10939 2272 2678 24678 24213 23036 24446 7445 11941 26925 5629 27173 28 9711 13099 27174 10411 2698 222 5838 13969 6296 27175 22035 7300 10961 27176 27177 686 165 27178 11956 27179 23734 16562 5464 14201 245 11892 2441 27180 10198 26933 24294 27181 8592 24212 27182 9984 9742 1125 24910 27183 5750 24316 2525 14495 444 27184 23979 2567 2345 7755 27185 24911 272 14582 9360 27186 1975 27187 8390 660 27188 25043 10412 5817 27189 12320 5744 5738 1437 27190 27191 15013 27192 8058 27193 11925 11943 14851 5630 1075 27194 7993 10202 1707 4811 26734 26721 2854 1745 27195 27196 9813 8920 27197 24723 5645 27198 27199 27200 1954 27201 2751 2774 447 26558 27202 23956 27203 12284 27204 8019 15546 27205 27206 27207 27208 27209 1735 9767 2910 27210 12480 8936 27211 23762 27212 1712 27213 27214 1814 27215 22959 27216 5622 3104 24438 16206 27217 8401 2112 27218 11972 16283 359 27219 27220 2508 16234 1273 27221 9896 27222 24857 27223 6888 16416 9868 25188 3210 1624 27224 8670 16767 27225 8083 13910 10958 27226 1695 13685 5745 5753 3440 23161 16929 12663 22181 27227 27228 1774 27229 26666 27230 17087 27231 10487 27232 3380 3387 27233 1351 8563 3352 9960 17151 1663 24265 24783 27234 27235 4798 27236 1688 8623 15777 27237 15244 27238 27239 27240 8694 15152 15104 27241 17277 2779 7082 528 17233 17322 15295 27242 3534 5790 9926 27243 2207 9950 10682 9941 27244 633 11910 22202 11999 380 6141 17509 27245 21517 17569 9943 3702 26924 11740 16475 17639 3778 5791 9961 27246 17693 3700 17699 492 1765 8194 8632 24305 2307 24692 17824 483 27247 27248 27249 17917 24325 17931 3806 17950 27250 5827 23489 17258 18028 90 11774 27251 27252 10614 27253 18123 27254 11708 4014 27255 11713 27256 27257 3970 8402 3915 17919 24937 10518 27258 18222 11062 18264 27259 24343 9968 4057 504 19339 4060 27260 18354 10527 27261 23077 27262 5801 21721 18373 4134 854 24214 27263 18465 8220 18606 22232 27264 3766 8142 4282 11701 18578 19348 8216 18433 4395 531 18822 18686 27265 18312 26700 27266 11202 27267 11704 27268 1770 18904 27269 18772 27270 24308 10613 27271 18814 27272 27273 7092 27274 27275 27276 18110 4423 18862 27277 4357 18884 27278 982 15961 11771 27279 25147 27280 18906 25151 27281 18941 1715 27282 1686 8086 27283 1475 27284 2123 1655 27285 19231 6157 8226 11901 8695 2865 8499 18597 26767 12794 19047 26938 27286 27287 27288 21228 24485 19081 19167 27289 21732 27290 10563 19049 27291 19129 27292 27293 24310 27294 27295 27296 27297 4863 19166 27298 24565 24216 27299 27300 11780 10295 19356 1726 27301 24685 23520 27302 27303 19469 10024 879 877 27304 8416 27305 2169 19338 27306 669 27307 27308 19574 4213 10303 26966 5202 474 19741 835 820 13420 10895 27309 18510 27310 26053 19759 19848 27311 27312 19898 27313 24679 19975 27314 4868 27315 20220 27316 27317 27318 27319 27320 27321 5199 6835 10618 27322 6191 10026 1865 8140 23178 27323 8236 5902 27324 27325 3165 9964 20278 681 20282 27326 19991 1884 20388 5661 1539 27327 8267 20375 27328 22267 8239 19592 8931 20541 27329 2923 5078 27330 10741 473 27331 27332 27333 1675 27334 8221 24691 20873 8263 27335 27336 27337 27338 27339 10362 21025 27340 11115 21530 545 21108 21474 27341 12739 8192 5911 13028 13719 5895 10038 27342 21365 27343 27344 21386 21690 27345 10897 27346 19179 27347 19322 1303 27348 1669 24701 24309 27349 20671 1758 27350 27351 27352 21375 890 27353 27354 27355
266 8262 1029 6926 959 381 27356 7500 27357 23652 12474 21811 10155 5498 24257 21991 775 1910 11682 27358 124 6806 8619 159 6858 121 26061 11927 4922 27359 27360 5579 27361 373 96 23955 4892 269 5496 212 5602
267 27362 114 27363 373 13 9054 374 1569 7915 9067 27364 27365 21836 5351 13218 27366 13282 27367 27368 9046 26794 7531 27369 21862 25291 27370 27371 27372 27373 7611 25361 11013 12383 27374 27375 27376 467 13898 26150 27377 27378 6278 15242 25862 21673 5141 8865 5754 25976 17033 9924 27379 27380 27381 11792 17627 3773 817 27382 18047 27327 17869 9548 27383 18181 27384 27385 25939 7076 12684 9970 27386 24551 18645 20333 4322 10540 4302 27387 11081 18986 27288 522 27388 19089 19210 19145 27389 19265 12713 5882 7088 27390 20003 27391 20013 27392 10587 27393 27394 20580 27328 20556 27395 22489 7107 27396 27397 27398 7111 27399 27400 27401 11128 27402 27403 27404 27405 27406 27407 27408 22306 27409 27410 27411 27412 27413 27414 27415 3960 27416 27417 27418 27419 27420 27421 27422 27423 27424 27425 27426 27427 27428 27429 27430 27431 11164 27432 27433 27434
268 27435 27436 1009 12625 22082 663 10693 2060 27437 1173 4553 2005 623 5522 11669 22100 1312 5475 27438 1411 5546 1080 27439 8876 1132 27440 27441 27442
269 7331 27443 10432 5713 1823 13105 5752 3423 12672 12669 439 13084 27444 27445 12819 27446 27447 27448 4956 27027 2407 5416 27449 890 27178 9489 27066 22301 1024
270 27450 5066 13 6786 16000 2648 12250 10723 12944 8140 473 12508 496 27451 3627 6892 5084 18947 3677 24644 3573 27452 27453 760 12402 10764 27454 5844 21910 25094 25100 27455 26103 8820 427 3932 27456 12371 2114 5199 8682 5868 27457 14518 4463 11028 27458 10969 27459 25113 5257 18292 27460 27461 18310 26116 1252 27462 27463 5700 13133 27464 27465 20346 27466 27467 27468 27469
271 24904 6715 13573 14298 442 14910 15008 15205 15647 15613 15750 15920 10243 16304 9447 9947 6897 7476 18075 19985 5208 5194
272 54 392 5588 7192 9054 5653 159 11208 6 7412 5615 12 11 27470 429 7538 5964 7185 2923 27471 12307 4887 4908 124 667 7191 67 22062 9068 10947 24118 10762 7202 9028 27472 22 436 10943 25163 27473 26214 7186 13213 181 10752 6711 2413 384 10932 24205 22033 46 106 205 8096 684 132 111 214 27474 527 101 165 11207 12300 6862 27475 96 12866 282 27476 13296 344 425 126 21819 2080 4938 27477 8062 9591 7515 4933 27478 25525 27479 7480 6610 48 9035 11205 23648 7004 27480 387 27481 6806 10462 25192 432 27482 1103 26152 145 6914 267 13273 6517 12299 12314 6997 27483 7000 9078 8112 10940 775 155 21800 22037 7807 21797 19 21805 7473 27484 34 1344 1066 27485 27486 152 7750 22054 6909 7501 13781 27086 162 8118 8106 10937 774 32 27487 13399 13917 4940 203 13377 27488 5569 7290 9199 22061 27489 88 435 12886 14006 577 13611 439 13601 10840 9613 1870 27490 21980 12856 9036 1031 27491 25249 25250 1109 14054 6926 27492 5573 7431 12878 2272 27493 21986 27494 27495 27496 8126 4945 421 13391 7580 265 13869 13667 27497 21988 348 6057 27498 13404 8132 25526 9533 13810 27499 7045 23658 144 77 25240 13904 444 13776 9625 201 17073 1743 14571 11915 27500 9391 14433 10809 13731 12412 25236 27501 17967 14069 261 13728 13768 13517 551 27502 4923 672 5435 27503 14429 13933 12151 27504 13616 285 5546 258 27505 26991 7506 232 27506 27507 7028 163 14804 14928 10214 12425 27508 27509 24538 26575 13982 27510 27511 192 11012 27512 27513 21853 14387 7550 4962 14436 25254 21885 10853 14018 7985 13961 27514 10814 8843 11906 456 9750 1018 27515 249 27516 431 58 280 453 8841 433 415 15223 514 27517 14172 7406 24180 12440 27518 9130 6733 23707 27519 4892 12351 4647 23887 253 27520 353 27521 21837 378 27522 122 5326 8842 2834 6374 7441 10229 7417 27523 27524 27525 27526 27527 1431 27528 12066 8105 957 2689 27529 2532 11664 27530 23881 1069 237 27531 14545 27532 971 68 8550 685 2341 2340 6881 10218 1999 22026 7879 10185 8917 12493 7878 14306 22025 5115 27533 12929 370 27534 27535 8129 27536 24182 6830 9414 27537 7311 27538 423 12390 2606 5555 419 15967 10041 12090 1916 7984 14985 27539 2519 10246 314 15739 136 27540 6879 23876 27541 16175 2490 27542 369 27543 14964 16404 16449 27544 2800 10791 5087 27545 27546 2903 27547 325 2949 16546 6891 12751 16170 3151 16265 27548 16551 15735 27549 15771 15013 90 220 27550 12867 27551 27552 14308 27553 27445 27554 6139 792 16824 167 21799 9716 27555 21995 16398 27556 8140 27557 7042 27558 27559 6154 473 474 222 1830 8192 6884 10899 27560 16767 8084 27561 27562 8493 17082 17065 5720 27233 24716 27563 17075 11766 11426 8166 13111 17183 26028 1833 27564 27565 74 1899 27566 11258 3838 6376 27567 27568 7883 10269 16717 17387 3512 12631 27569 480 27570 17408 171 27571 7052 27572 17198 27573 23384 27574 3651 12512 27575 1842 21997 1948 27576 7062 27577 8554 826 1119 17561 5225 27578 27579 17681 6453 27580 27581 5839 17843 27582 3127 2914 3101 8141 3863 17709 1129 12633 27583 2289 2807 9067 15103 27584 7068 27585 27586 10797 27587 3541 27588 831 8116 361 21737 27589 4659 1835 12961 17403 27590 1202 25482 16802 14004 2985 7455 27591 12107 27592 5791 27593 849 12454 27594 27595 4068 27596 3955 7099 27597 27598 13877 27599 23085 8520 687 13617 4260 6888 27600 12971 4145 7230 22314 27601 1311 27602 5000 27603 4263 23255 27604 19068 773 3028 18596 3878 504 18615 18599 27605 6792 27606 27607 18343 9866 27608 27609 4063 27610 5204 1294 5784 22003 27611 27612 9317 27613 23514 853 27614 27615 18744 26999 10733 12980 8210 13001 27616 27002 905 12749 4034 27617 27618 18806 5859 26959 27619 27620 27621 27622 27623 9254 15472 27624 10300 12990 11085 21470 9221 27625 6883 27626 1236 19374 19540 19346 27627 19705 27628 21407 27629 27630 19769 27631 27632 27633 19901 8268 1247 27634 10562 6835 20063 35 20326 20241 27635 12753 27636 27637 21141 927 12832 21042
273 8749 5682 46 8 39 9048 677 9 105 16 12399 12295 12331 27638 3297 12324 26061 27639 21784 118 6914 27640 1427 27641 24205 27642 21868 10829 181 10937 7803 23270 24009 3075 29 21973 27643 7866 27523 8279 23051 9510 22058 6513 27644 278 5404 1990 13347 27645 27646 1533 6924 1355 7996 27647 27648 7420 27649 13426 27496 24236 6601 26021 411 12337 27650 27651 13188 9578 2877 4923 96 6960 13318 13314 24829 6572 8035 27652 92 26070 27653 5442 8775 25062 8822 5608 6664 9650 8765 5359 6731 106 11205 13463 2093 189 24266 17457 13205 11015 121 13189 27654 6666 4963 13786 16638 9629 661 8735 13707 27655 51 9654 22055 6671 190 7431 8780 12385 9628 5405 7572 21800 13606 9130 8066 27656 13736 5987 13793 4977 7502 23263 26187 23261 27657 23266 4976 192 15357 6708 21840 348 6721 27658 435 9766 14071 5579 23278 72 27659 25308 8057 7206 1344 27660 27661 22063 23267 108 14106 6736 6922 6723 27662 6794 13320 6828 1573 6734 9534 21818 14265 6789 8772 27663 14285 14439 21805 27664 27665 4935 13900 2224 27666 22328 8551 9590 27667 14365 27668 12343 5448 27669 27670 14452 8493 27671 268 27672 15454 27673 27674 14652 252 21867 10804 8132 5600 27546 253 1582 6761 22263 21812 26078 10810 14517 8527 8729 6617 9743 6735 7992 5014 27675 27676 9722 27677 27678 27679 14337 6757 13497 26104 6970 1612 27680 27681 27682 27286 9757 14240 1575 6589 27683 27475 27471 27684 1596 2502 6760 23958 24247 7435 27685 27686 14661 23344 6769 15059 9785 6763 14590 26727 12351 12350 14908 6783 25527 1605 9530 1264 27359 8144 23302 288 15010 7443 8795 14804 12937 23685 6774 398 5061 7439 8157 27687 1141 12930 6786 14098 15348 8790 7871 152 8495 67 22041 25 10869 134 5218 27688 1940 33 27689 12474 8082 27690 3323 23392 7441 10214 15199 15281 27691 22360 21827 2788 9519 14989 280 15020 27692 27693 5477 15985 14441 5063 27694 27695 27696 27697 15640 6126 6830 27698 7417 15524 27699 27700 15684 23396 5077 27701 27702 27703 16582 27704 27705 27706 22156 9865 27707 9448
274 48 60 8619 6909 5653 8622 22062 5595 93 105 149 25591 76 27708 7814 12469 113 687 157 22025 12488 429 11288 10943 134 62 183 38 270 11206 27709 13313 9984 27710 2 27711
275 7798 7794 10981 25541 1309 24707 25545 6419 11224 25547 2150 7804 13263 4922 7471 1186 25560 12142 25554 13716 25580 10999 324 14605 25643 25626 22334 169 9730 25619 25669 6397 25675 262 25737 14856 6348 25743 25766 9995 15391 1268 25884 349 25870 27712 27713 3356 25960 27714 25976 359 11258 27715 25957 5784 17303 27716 11795 17535 27717 17943 17777 1202 27718 18439 1304 18590 22294 24134 27719 1331 10347 11843 27720 11841 11847 27721 27722 7813 74 11290 27723 6427 11282 27724 7200 21759 1924 27725 6433 270 7409 8729 7826 11284 27726 11267
276 1872 6592 5339 22237 23991 5433 1901 8002 27727 27728 27729 7997 27730 27731 23664 723 7387 4922 27732 27733 90 2000 11016 27734 6624 6563 2002 12865 7390 27735 13434 22036 6718 4893 7996 427 6620 820 13389 6637 24260 13336 13549 12876 2088 6636 20 4951 7396 21972 5598 2407 13076 8676 171 435 13595 9427 4968 168 23062 1031 2252 4610 27736 254 2661 310 27737 2924 355 4839 27738 15485 9898 3785 18380 17991 13016 27739 5101 27740 5632 27741 24772 26800 5383 10867 7042 27742 27743 21643 27744 671 27745 27746 6676 696 5401
277 27658 379 380 5669 27747 27059 27748 27749 8030 8787 27750 27751 8447 1365 2067 27752 8812 1587 25055 24097 7729 27753 21515 24940 27754 27755 27756 27757 27758 4912 8551 11379 2260 2152 24394 6805 6349 2374 9764 21621 5302 9400 27759 27679 27678 1575 27760 27761 27762 27763 14931 7771 26818 9821 27764 6079 447 8127 573 6355 7328 4821 13394 13092 12279 27765 22091 8530 27766 8548 12082 2840 27767 9220 3351 3313 24059 24489 4401 27768 27769 8328 27770 7733 26262 1879 27771 27772 3221 12221 27131 12497 67 5191 27773 26989 7786 7757 10779 27774 1715 24361
278 10867 1804 25213 10826 5985 27775 12090 15267 2443 9176 9414 6936 27776 27777 15299 26094 2876 27778 25370 5231 20640 2688 9367 27779 27780 13078 27781 27782
279 5351 2131 5638 9890 27514 27783 27784 27785 9054 6409 27121 186 27786 9162 27787 9065 27788 7028 27789 9066 27790 25282 27791 191
280 23660 9561 1006 5475 1435 27792 9575 27793 8417 5804 27794 6094 3635 5658 9557 5990 6024 2374 13 3542 16793 18923 6161 8343 6235 25306 8424 27795 9023 27796 1024 27797 1553 27798 5489 7786 27799
281 27800 22058 12 6 6506 537 27801 1006 7829 118 8096 7191 1870 10421 12120 775 251 551 5654 90 1948 7290 13 24173 186 8619 10950 7833 27802 429 10947 8486 7832 436 7202 9322
282 7794 10973 10974 11216 11284 11214 11285 11210 10985 6438 25541 10990 11219 7802 11221 11215 11286 25550 25559 9973 7805 13227 11295 25554 25607 12138 25573 11231 25572 13558 25582 11792 25585 2160 10098 23227 13580 13771 25629 11002 210 25614 25630 25628 14126 25638 11007 25713 14528 14514 275 25714 13980 25744 25748 25750 299 6089 321 318 25782 15455 9412 15850 15820 27803 15906 25850 16388 25995 1829 27713 12661 25095 11259 3272 27714 25976 17270 3572 12785 5784 27804 359 3450 25980 27805 17476 11795 27806 8209 9257 27807 27808 27809 27810 27811 27812 1342 27813
283 26641 7258 27814 27815 6863 8742 27816 6341 21655 23245 12862 27817 1537 8022 19946 5551 22133 24347 5780 27818 13507 12081 27819 24138 23953 5766 1776 7328 7490 1763 27254 27820 2746 27821 15747 27822 27823 27824 7095 18095 27825 27826 27827 3796 27828 19260 19903 20983 27829 19018 21954 27830 27831 26148 27832 27833 6567 23013 23572 21182 10096
284 10973 7796 27834 8097 12129 6408 25547 27835 13177 7800 7795 6438 6410 6416 6417 11221 6419 11225 6418 7804 13301 10995 25596 25745 11244 25851 27836 8421 27837 9545 27838 27839 27840 27841 27842 27843 27844 27845 27846 27847 27848 27849 27850 27851 27852 27853 27854 27855 27856
285 26528 12502 27857 27858 5284 11336 27859 25052 24084 718 6506 2013 26653 27860 8850 27861 5490 27862 27863 5488 724 5319 23835 27864 11887 24518 5482 8508 26652 27865 732 27554 26994 5980 746 24034 7290 27866 27867 13059 5499 23009 27868 136 27869 10717 27870 27871 9983 1431 7167 2240 5291 2262 8348 9173 2677 24032 10711 7259 5509 4500 7316 27872 8528 12560 7320 2430 12544 24424 27873 8300 26301 6529 5312 9184 27874 11355 10212 27875 7786 12523 11680 5496 1114 27876 27877 27878 27879 27880
286 10458 5971 1563 23423 27881 27882 21863 27883 27884 27885 6589 27679 27886 13570 27887 10834 27888 27889 27890 27891 27892 8532 1546 6693 25017 25018 21860 12383 27893 27668 8783 12460 27894 27895 23186 11 27896 27897 21886 27898 27899 26178 8023 25196 8705 26160 27900 27901 22079 24930 21789 9453 5604 27902 23261 27903 12398 6956 27904 27905 21777 5697 5613 23200 13075 27906 24845 6578 27907 8340 27908 27909 12439 10796 8855 27165 8051 22048 27646 23674 24011 21491 27910 27911 12428 6695 1589 27912 11665 12333 27913 27669 22170 27914 27915 5404 9322 6696 27916 23154 27917 12378 27918 27919 8 12343 8587 5476 7028 27920 27921 9321 21778 1388 6327 26793 27922 27923 8781 27924
287 9042 27925 10878 9499 27926 27927 24964 27928 27929 27930 7567 27931 27932 9503 7694 27933 21789 13235 27934 27935 27936 21793 13256 13270 27937 7552 25252 25253 25247 7533 11011 27938 27939 27940 7677 13216 27941 27942 25237 9583 10879 11014 13298 13284 27943 27944 13304 27945 13274 27946 27947 21765 27948 27949 27950 27951 10472 7579 13303 13319 27952 27953 27954 27955 27956 27957 27958 27959 27960 27961 13339 27962 27963 27964 27919 27965 13346 8654 25285 13338 27966 7523 27967 13280 27968 25234 27969 27970 27971 13272 25282 13223 13355 9495 13290 7700 27972 27973 27974 7561 27975 27976 13257 27977 26019 7534 13244 27978 7602 13279 27979 5613 27980 27981 7568 7530 8661 27982 13413 7604 13448 8649 13367 13433 13393 13467 13470 10888 7543 7618 27983 27984 7617 27985 7609 7589 7564 13499 13193 13317 27986 27987 21762 25529 13506 13278 13535 9532 13568 13524 13562 7619 13570 27988 13608 10889 13536 13560 27989 13453 27511 5639 13628 7622 27990 9518 27991 7531 13626 10884 13243 13696 7631 13651 27992 7625 7521 9637 9119 27993 9140 27994 13720 13772 13725 13850 15762 13775 9509 13774 243 7648 7620 7606 13807 27501 13926 13933 13934 13828 13728 13768 26020 13921 27995 27996 27997 13957 13526 27998 13813 13865 9520 9522 13990 14046 14078 27999 9523 14047 14104 14151 14124 14179 14121 244 14194 14203 14267 13856 14243 234 14142 13919 14193 14191 247 9713 14041 13967 11018 28000 7654 14323 14339 28001 14225 14252 14093 14378 9748 263 248 14008 14433 14425 28002 14407 25137 296 28003 14520 14525 28004 14538 14346 14502 9528 14569 14575 284 14568 14181 14549 14591 11035 28005 14436 14534 9794 14645 14649 28006 14423 14702 290 14706 14733 14704 14698 14522 13741 9799 14042 14689 28007 27502 14721 28008 14791 14756 14848 14825 14592 28009 14720 14900 14887 9536 14893 14890 28010 14865 9540 14836 14885 14866 14377 14950 14630 14945 15025 15029 14852 14180 28011 14998 7673 15023 14659 14891 9819 15024 15046 14992 15163 14484 15118 28012 15171 15149 15156 28013 15142 300 15301 28014 309 15225 15210 14635 7581 15260 15288 15139 28015 11040 28016 15423 15424 15138 15338 15440 15236 15467 15404 28017 28018 15403 15500 15434 15438 28019 15571 15669 15671 15570 28020 15818 15776 15871 15995 28021 10417 28022 15237 15932 15955 15888 28023 15982 16078 15773 15774 28024 15926 15933 15950 16004 15623 28025 16083 16143 16284 16075 16356 16615 16324 16327 16560 16285 16329 16530 16669 16568 28026 28027 16474 16631 28028 28029 16670 28030 17117 16661 16400 16878 16930 16574 16601 16729 16732 16808 28031 7671 15874 16857 28032 17392 17323 23912 28033 17529 17283 14776 18177 18532 28034 10569 19728 19686 28035 20222 10329 19863 20259 28036 20487 28037 28038 28039 28040 16176 28041 548 20481 28042 21217 28043 28044 20606 20742 11119 28045 28046 28047 26038
288 28048 28049 5217 26569 4896 4915 26556 6356 28050 28051 28052 8847 28053 23492 28054 20368 28055 28056 28057 8848 8322 28058 28059 28060 28061 26300 28062 28063
289 8356 10955 12167 8354 4554 1464 7504 28064 28065 23798 11900 1074 11982 5631 10432 26215 5629 8005 24701 28066 1404 8323 23894 23784 8101 23105 395 1006 25038 24423 12163 774 5630 24633 11890 5363 28067 28068 26986 400 10439 5201 28069 6510 6550 5658 5964 5453 26989 28070 28071 28072 12423 702 5389 28073 24285 4944 1573 13078 28074 28075 6319 3378 28076 28077 28078 28079 8895 8670 28080 387 28081 28082 24383 8371 24684 13276 5820 28083 28084 4956 10941 1654 4804 1743 28085 1376 11922 5950 26799 669 28086 11668 28087 4938 164 9649 24221 5044 28088 398 10764 24351 28089 24564 28090 14 7033 4976 6998 439 28091 22330 28092 6705 28093 28094 28095 6997 6012 25023 28096 27349 21757 28097 27772 2223 779 390 27368 6624 24121 1397 5642 2333 2122 4958 8343 4336 14106 11027 5647 11679 10443 28098 6742 8813 28099 28100 9742 7278 27181 5624 9725 26583 27283 24227 28101 28102 27197 28103 2374 5671 4337 11297 444 8253 28104 28105 10198 1367 11776 12900 28106 703 6042 12516 24359 28107 21869 21872 13707 5546 26761 9204 26985 4828 8058 28108 427 11722 11985 23818 7447 28109 6767 28110 28111 24487 7986 28112 28113 8910 26184 9778 21639 432 1196 28114 7660 23112 16190 6311 11686 6330 23889 1899 28115 12450 11697 9813 8694 445 6785 11995 310 2774 2785 8894 6452 28116 9167 11696 15748 28117 9868 1422 13 27211 355 28118 3104 16138 28119 11654 16624 3275 6400 10259 28120 6885 10021 18208 18884 12371 5961 23802 28121 28122
290 27750 5236 5622 13204 26924 26986 7976 28123 24366 11922 28124 11890 11891 11933 11934 23187 23185 23193 23190 23194 5669 28125 23195 7238 23192 5938 23424 28126 10159 527 4573 28127 11883 1389 1743 4956 6325 28128 28129 6257 28130 28131 28132 26752 10439 24550 28133 21832 1707 11941 24028 27317 23110 28134 24908 8634 8623 23427 11951 483 5111 8639 9808 5202 1739 11888 28135 28087 23188 3670 8318 28136 1564 12155 4777 13462 21648 28137 6307 23747 24688 8624 8364 8468 1556 114 8427 28138 28139 12005 8326 1783 28140 5939 407 4579 1536 24505 24701 372 21476 23660 28095 128 28141 2197 2318 25403 2923 28142 28096 28143 27241 5291 8327 1593 11722 1370 12042 373 13 28144 8341 24844 5365 28145 3887 28146 28147 9666 8050 28148 23887 2057 7423 8489 28149 8411 8528 28150 28151 2386 5199 28085 28152 24183 1365 13815 1686 24347 24355 8363 8621 1623 28153 24184 2348 28154 8352 23974 6360 9754 21639 14746 28155 24012 15767 26285 27220 24687 1607 444 27824 28156 8601 28157 27303 28158 28159 28160 26901 6533 28161 6321 28162 23250 23252 5003 8682 11028 28163 509 523 11033 2528 28164 9413 3061 6107 28165 13307 12436 21515 4597 28166 8398 12537 16579 28167 14197 24858 28168 28169 28170 2734 28171 28172 8674 9679 15076 6279 27214 16466 9751 8625 27141 9806 11043 9896 8748 5583 10611 28100 9903 9943 28173 28174 3011 28175 28176 13685 13683 25341 12453 12428 28177 27749 28178 2671 28179 4681 402 24846 24785
291 5618 28180 28181 6537 28086 28073 28182 24359 373 28183 28184 13509 10826 26581 25011 28185 21940 25045 395 23817 26985 28186 24770 13097 28187 28188
292 26473 28189 11339 28190 12032 26825 28191 4960 26085 4995 17445 7063 28192 28193 18043 17995 20222 19874 28194 28195 28196 28197 28198 28199 21400 28200 28201 28202 3262 28203 28204 28205 28206 28207 28208 28209 25159 28210 28211 28212 28213 28214 28215 28216
293 22056 1384 7752 28217 28218 1870 28219 5472 10818 28220 31 198 278 239 28221 11201 6909 1269 17 4888 24994 28222 1103 1427 28223 24122 1796 196 6491 993 379 28133 28224 136 237 354 28225 14 334 28226 1948 12866 28227 9334 177 12597 14727 27525 88 22030 22315 55 22040 67 28228 670 24859 28229 5420 130 28230 45 24943 6916 974 28231 7198 24170 677 28157 6919 656 5597 394 5599 12384 28232 5725 409 1 5941 38 26744 6827
294 24398 1793 24776 3307 22182 1836 24063 4709 28233 5812 28234 5827 7073 841 3959 11063 4196 4004 26250 28235 28236 28237 28238 28239
295 5614 106 7804 28240 28241 28242 28243 28244 11837 28245 28246 25744 28247 28248 7950 28249 28250 28251 28056 11270 22062
296 458 28252 8631 603 6508 5926 6486 154 11907 8326 28253 1589 28254 7037 24788 28255 28256 12162 21613 28257 28258 24414 23328 11892 28259 1599 502 1424 375 5587 5710 1649 28260 28261 28262 28263
297 8354 24775 5837 13211 28264 28265 5838 5840 28266 28267 8361 28268 15625 28269 28270 28271 8367 24279 1990 6271 27728 27729 4788 12331 8591 10458 9404 7733 7758 569 395 28272 774 1872 28273 27133 13321 13197 5643 1014 820 2056 3376 4800 4806 20504 13495 9092 24767 24756 12865 13069 2088 387 147 13187 13655 583 4804 9647 9649 8390 4938 667
298 430 28274 28275 8825 28276 28277 23072 8295 7140 527 28278 12279 28279 28280 551 5277 24878 28281 7478 1924 13 7156 1753 114 7153 27445 28282 28283
299 1688 28284 6073 4922 1005 1361 187 23790 1387 23074 28285 13092 691 1754 1034 8434 23957
300 395 8780 28286 28287 28288 13075 28289 10413 24211 4776 6299 28290 26698 8886 28291 6328 7480 5682 1533 26524 28292 24003 1503 12171 464 22066 6501 28293 6928 7738 1104 28294 7739 7492 5277 527 5326 28295 28296 7978 957 12324 5182 1389 6548 23814 401 16937 6628 4785 26538 5821 26058 679 24423 28297 26593 28298 27037 673 7773 1594 6732 8071 8112 28299 8321 1537 27496 10079 1665 7208 987 8867 8435 24505 28300 27096 1103 8437 439 5962 409 23707 23119 6570 13488 24903 28301 28302 8490 7423 28303 11940 7782 7271 6365 28304 13472 13344 1031 8778 8882 12770 23999 5420 13076 4938 5961 28305 23133 9567 6364 27506 1573 8352 435 684 8355 8362 9686 785 7437 10294 28306 8318 12855 28307 8368 1794 28308 8382 28309 28310 1567 28154 28311 2118 28312 28313 6622 11962 5730 6713 28314 403 24772 12184 6571 6735 28315 6722 8311 432 6636 28316 8082 28317 8305 28318 9383 6773 8379 6407 1363 28319 13062 28320 14818 2155 14750 28321 6602 6582 14506 28322 6763 14452 5433 6899 2000 6656 25072 9992 4977 6774 6603 6655 6779 5598 8150 168 2662 8345 10 24002 28323 6794 8003 10219 6765 5534 15336 8067 8064 1140 14066 28324 4653 6902 28325 8134 2826 8913 7316 8152 729 28326 10216 28327 13916 23210 13538 14357 24380 2759 8392 8151 9448 28328 9590 15485 28329 2878 15186 15733 13649 6319 11928 23212 28330 13092 7505 1029 21996 28331 15999 6798 16066 15160 21617 407 11950 8844 15896 408 15527 28332 6115 5111 1559 25085 13335 28333 4945 28334 3004 8171 28335 9444 15962 2849 15904 25086 16081 14912 24841 16385 25442 28336 9391 22367 28337 28338 16784 28339 3177 2560 10763 26100 4 10723 1836 7047 453 4990 5370 8172 25091 17303 1252 8181 17374 3423 8186 11793 11799 22375 28340 9861 10021 17384 3557 3576 28341 28342 17576 5802 5793 8185 28343 3740 2991 3742 12794 17642 17692 12799 6898 5814 17619 26670 240 28344 12804 28345 3538 3738 8127 28346 28347 3901 18134 8201 28348 18266 28194 12685 11441 18010 18226 18292 22224 18310 4036 6474 18765 9971 25496 22240 24547 17520 10540 4370 12694 18602 18734 4493 12808 25104 12989 19202 18779 28349 18878 12709 28350 10022 7712 19201 28351 12356 7066 18866 22252 22257 17483 19626 19706 12712 9249 28352 19533 3628 19984 9283 11527 10577 20087 20072 6168 10028 19835 19758 20056 20446 28353 11532 23577 28354 28355 24615 20439 6182 10331 20419 25120 19597
301 973 151 7224 1013 1665 114 28255 25144 25021 7189 604 12276 28356 1075 28357 22379 5466 670 12423 28358 144 24119 640 23307 971 1364 7478 24721 27479 102 150 23997 6918
302 28359 28360 10955 28264 24230 8073 6590 24148 25318 8636 13165 8639 4897 5631 11657 3165 27244 6654 11999 5349 380 5346 4792 5429 27913 1565 12459 4788 28361 28362 28363 28364 28365 5406 28366 156 8027 5581 28367 8019 28368 8026 27205 28369 8621 13205 8675 4820 6660 13266 5405 12000 27158 13253 5823 8697 24821 9576 8601 9375 6568 6571 6275 28370 5363 251 11898 28371 27343 820 10958 21749 4838 8822 5983 11932 27260 26986 6582 26215 12343 5407 6591 6910 8020 6601 3297 28372 4800 10930 11939 24397 11970 8067 13080 5820 6659 147 13302 6620 6678 7027 9610 28373 24820 8011 387 432 6636 13709 8674 26270 28374 11949 6641 1507 9650 1803 13864 8502 4938 13312 24760 2112 11972 13876 13910 28375 9964 13307 11024 9431 8682 1895 14784 28376 17017 2197 28377 9679 21509 2130 6722 28378 8676 13979 4997 6714 14015 8670 14053 28379 13707 28380 6096 14112 28381 27131 6710 24910 21667 21668 28382 11028 13530 28383 28384 27819 14238 9736 28385 6658 12913 12964 9719 12967 12973 28386 25040 9751 9385 14010 6773 13060 10520 28262 11033 6769 28387 2307 1607 14652 6708 8263 644 6589 28388 12516 27136 13868 28389 14598 6753 24324 6734 457 24336 6723 5092 6741 28390 25007 28391 28106 13572 6755 28392 6765 4821 6761 27234 27290 2221 22219 9330 14842 27123 14210 24911 6762 14159 4798 14163 5560 13176 5780 9204 14901 695 2478 9805 28393 8225 13685 509 14802 27153 14497 28394 28186 28395 28396 28397 14681 28398 9809 28399 28400 28401 9822 6672 28402 9823 6750 9806 13743 15076 6786 9830 335 6758 13730 28403 15159 15199 6779 14854 8693 9364 13935 14183 11043 2235 15476 9844 14981 3061
303 8478 669 23077 366 1622 5389 5622 3990 28216 26748 28404 12458 24835 7156 28405 28406 28407 28408 28409 28410 25423 25424 25425 5462 28411 5619 25317 28282 28412 23429 8801 12853 1415 24022 1890 26569 1959 6907 9588 23714 20504 1783 1006 21806 26268 120 968 23176 1546 10439 28413 7484 5950 27161 28414 9623 12022 2154 28415 12020 24396 735 23669 28416 5543 25461 7170 4610 26898 22349 1793 14623 11681 28417
304 1712 21474 8261 5837 4956 8426 9317 5947 5462 3437 6549 6544 23729 28418 8329 2100 28419 28420 1370 12913 5449 26242 24371 28421 10411 28422 1793 673 28423 6346 6319
305 28424 28425 7234 10843 7250 28426 28427 13092 9319 5488 6314 1063 23138 1465 1792 3164 28428 24445 28429 551 7230 8879 28430 1038 26776 975 10792 24095 7167 28431 707 5284 12761 7243 7139 6315 8533 28432 1687 1769 1211 24140 1074 24364 1106 28433 5782
306 28434 1206 28435 27173 23714 28085 28436 1629 7768 6340 25439 13062 6341 28437 28438 28439 9324 28440 11784 28441 28442 26758 26303 28443 28444 2426 26563 28445 5679 7153 10793 28446 26473 28447 91 25148 28448 28449 1377 24394 28450 28451 28452 6358 28453 6458 2078 28089 24374 5487 740 6315 12478 8853 7753 28454 1508 26966 28455 28130 5688 10956 25056 28456 6069 3670 5274 26710 24770 28457 28458 10941 28459 5492 28460 27554 5700 5264 28461 28462 24037 11883 1707 28463 8842 21645 4898 28464 28329 7747 9184 28465 6309 6079 1692 413 6544 417 28466 28467 9572 1787 1389 28468 27139 28469 1622 994 10154 28470 25128 1365 11948 28471 23127 23123 23126 28472 2465 6362 28473 8896 28474 14734 11891 28475 2211 23378 23350 8323 2891 2936 5565 1915 28476 28477 25370 3380 10711 4808 28478
307 1005 9315 28479 23074 28480 685 28481 28482 28483 28484 28485 3579 28486 5625 28487 28488 28489 5115 1103 17561 28490 3098 2684 8973 2535 24843 3382 17979 3699 19068 2356 28491 28492 4018 28493 6230 3621 28494 28495
308 664 12495 1069 136 2413 367 195 4893 6729 13315 28496 4940 103 5653 28497 1432 7758 43 102 5597 38 7156 3 6623 5383 12312 28498 26697
309 26303 6341 6358 7746 1953 12221 23600 2688 4596 12235 28499 9174 2555 23503 28500 28501
310 5474 1924 22993 988 12622 215 7487 28502 714 22990 24425 28503 24363 4569 8363 239 2005 237 1802 28504 986 10460 23661 7853 28505 27445 1723 5514 28506 725 7914 5719 2280 22088 5554 7170 23240 23273 28507 5540 10229 1816 1417 28508 28509 28510 4695 24396 8338 27047 16575 23491 4364 4255 28511 4537 26502
311 10807 11295 85 7797 677 3075 61 56 7825 12312 22062 38 125 58 1870 42 8095 6918
312 5101 1626 103 28512 23809 679 23656 23820 10155 1075 8056 1364 8481 28513 167 8832 716 1601 8350 8101 4911 28514 2004 28515 4587 2749 28071 23816 23835 8508 6137 602 8925 1009 8012 25059 23823 5642 5439 619 23220 26784 11887 10926 1017 28516 22118 22337 28517 1034 6085 8717 1198 28518 4936 7995 1063 23787 28519 1108 5648 28520 5559 1444 23202 28521 6932 24883 28522 7790 23833 28523 6090 8924 1250 14861 23975 5489 5061 4650 1165 28524 5702 15494 28525 8930 1472 1088 28526 1046 5116 6114 5108 1719 1690 1205 1098 4626 1150 1789 1254 28527 1653 1140 6361 28528 11636 28529 28530 22371 26637 1255 12916 608 1106 28531 1123 28532 26742 1658 1646 1169 26731 5146 23217 1787 1051 1645 7791 28533 28152 27595 6030 23418 24932 1760 8859 12892 1691 28534 17458 8489 1180 596 28535 23859 1790 28536 3821 3877 28537 26662 23489 5459 11296 28538 1041 1249 24724 23052 554 28539 28540 28541 28542 1762 28543 23514 12817 1641 1457 23813 28544 627 1230 23968 8837 28545 1132 1070 12992 1256 1785 8867 26734 28546 28547 22271 7331 6872 28548 28549 1120 1746 23825 1644 13003 23636 28550 11204 24538 28551 28552 652 23950 5641 24876 5444 1045 28553 6907 28554 7228 1208 23972 28555 28556 28557 1026 1792 1724 12589 28558 1623 1148 1456 28559 7341 28560 10286 28561 28562 1440 1279 28563 25061
313 8766 187 2373 167 8493 90 13407 23253 28564 28565 12895 7390 2403 28566 28567 28568 27190 2493 7045 28569 28570 2489
314 25294 28571 28572 28573 28574 28575 5725 27029 12481 28576 8054 5404 1014 662 8404 28577 427 28578 6013 28579 5505 10 28580 28581 22 28582 6628 27020 25299 4892 22081 28583 5411 8015 25049 28584 28585 11659 7514 6573 5341 5929 5442 8323 12336 9340 1546 551 28586 723 28587 121 419 8363 6567 22092 4612 138 4591 4560 28588 8058 21956 5453 150 7507 6648 12625 26176 1423 153 25054 1426 6563 6634 168 223 166 5950 5495 172 186 28589 428 13917 8119 23298 974 191 1412 251 9311 22330 24358 13874 13992 4945 6742 1009 12872 9382 5987 28590 8344 286 9687 335 8343 294 24932 21986 7652 5514 4552 6719 25232 4617 24842 2255 23299 23300 2122 22089 28095 9758 28591 5022 2316 6624 28096 10190 426 28592 28102 630 28593 9377 24161 28594 7416 1916 9668 28595 2363 6783 28596 310 12914 5315 24387 7550 1434 5533 6767 1582 28597 9663 6058 23303 28598 11995 5015 8910 9432 2471 28599 4574 24136 8531 28600 9767 9865 12934 8878 28601 28602 2695 5088 9846 15167 8173 10228 28603 9183 9205 6354 646 7442 610 355 17940 25342 4962 2802 28604 2384 3127 8542 23339 28605 16682 28606 16404 4683 5047 22173 9907 10261 28607 2879 5124 5138 10791 12779 5146 22180 2562 2596 3230 28608 5493 5531 12580 17374 4679 9413 22192 12891 5794 3233 3574 3391 28609 5061 28610 28611 28612 10512 22160 15748 3452 2713 3190 8191 22204 23088 15823 7897 2758 3785 11645 18155 7453 10629 4654 4711 22220 22215 17301 21951 15919 11799 9962 28613 496 26929 7376 28614 4373 28615 3513 28616 28617 3679 1229 8987 1149 12707 21413 18312 3200 16624 13147 22244 8547 21381 24566 26197 23525 19286 28618 3893 4725 15830 19184 756 6850 28619 3474 28620 24603 8990 5168 20985 240 24576 28621 9808 4150 6484 28622 10358 6884 11532 13001 22444 28623 28624 12355 28625 21570 7068 5258 28626 5409 5206 22457 22273 19317 22460 12947 28627 5784 28628 23385 22469 28629 28630 28631 18381 28632 28633 6871 28634 12835 21393 4754 4737 5095 7891 8282 28635 22519 28636 28284 9173 12330 12729 5149 24695 28637 28638 28639 6892 4202 28640 9481 28641 28642 22591 2492 22250 28643 28644 28645 4767 28646
315 54 24809 28647 6557 5821 5437 17124 16941 28648 15124 28649 28650 28651 28652 17 28653 6927 7224 26768 389 1008 12377 24947 10867 11279 644 5404 26537 153 5368 10826 5466 4900 28654 5378 25215 6289 728
316 114 24702 25361 27797 7200 395 2227 7491 8835 23701 28288 8023 69 1021 11888 24229 121 4892 373 11938 25065 28655 7507 20 7982 7486 6728 8798 1573 22990 1579 8371 28656 92 13296 4211 4932 1601 6748 28657 6510 12388 432 4938 3818 14018 86 14177 6589 5616 6601 8343 28286 439 7506 13197 28658 22324 7871 28216 28408 28410 28409 25423 25424 25425 12853 14343 5979 28659 21806 21826 13894 28660 12206 26993 28661 4944 28662 27684 13497 23279 9635 5560 8749 382 292 28663 5565 4976 746 28664 26899 8923 1429 1767 732 28665 23016 10711 28666 6020 718 12544 9990 28667 6079 28467 28668 7316 6009 23233 28669 6015 12045 2686 8305 5081 6376 5441 5706 1814 10717 28670 23337 27033 28671 22114 387 1365 2613 6115 724 8291 4640 28672 28673 4564 21669 16125 4833 23079 28674 7375 28675 5312 7041 28676 28677 11 699 23381 24712 6978 787 13 28678 5728 1819 1095 28679 4935 2937 5117 9221 1176 3313 5752 10261 28680 10167 2053 28681 6480 9270 17275 28682 24506 24499 7788 28683 25477 9285 12630 12803 17166 15988 16084 4386 28684 25482 28685 6147 28686 24470 7208 3369 26671 631 28687 28688 5145 25370 28689 4857 28690 28691 12371 8873 22000 26926
317 149 13245 5630 9578 9036 28692 109 11015 13434 13709 8396 9690 13636 28693 28694 8677 13971 9700 281 14176 9582 13410 25602 9773 28695 25568 14367 13570 3074 14324 2509 28696 14306 14350 14982 28697 28698 15574 14656 15047 24438 3104 28699 28030 25067 28700 28701 28702 28703 9967 8225 5784 17752 18143 7679 10553 28704 10586 28705 28706 28707 19087 10527 7060 28708 19346 19485 19399 879 28709 7573 19491 8226 28710 5639 28711 28712 19876 28713 28714 28715 20098 7626 28716 20165 25145 28717 28718 7546 28719 8236 20184 19343 28720 28721 28722 19090 28723 19358 18377 20364 28724 19850 17077 21161 10585 28725 11049 19873 19225 28726 28727 7643 28728 28729 28730 20713 28731 28732 20679 28733 28734 28735 18908 15930 28038 20875 20032 21070 20697 21055 28736 28737 263 28738 23936 21183 28739 28740 21157 21295 18100 18905 27398 21365 20862 21189 21311 21445 28044 18623 20630 21369 28741 28742 28743 9651 28744 28745 28746 28747 28748 9064 28749 28750 28751 20970 28752 28753 26542 9621 14033 28754 16676 20590 28755 19611 112 19749 28756 18715 28757 18987 28758 19971 20059 28759 28760 257 19395 16855 19375 20619 20874 18838 19097 25772 28761 28762 28763 21026 28764 5881 28765 28766 17313 28767 19747 28768 28769 10643 26043 28770 28771 27923 26228 28772 16254 28773 10630 4061 21076 28774 28775 28776 28777 27411 28778 28779 26048 19377 28780 28781 28782 3813 19061 18705 19614 16952 28783 28784 28785 28786 28787 28788 28789 28790 16329 19073 9035 27957 28791 28792 28793 28794 28795 28796 28797 15724 16295 16766 19232 28798 28799 27431 28800 28801 10427 17081 9747 7553 28802 28803 28804 28805 28806 28807 28808 28809 28810 28811 28812 19180 531 28813 18192 28814 28815 28816 28817 28818 28819 19520 28820 15927 28821
318 28822 6399 5682 1533 27038 24152 24153 8838 12324 24942 24834 28823 8728 23153 28824 24950 28825 25448 27782 7511 23067 27037 396 26819 8052 25396 8033 1754 377 5237 698
319 644 24236 28826 4923 251 5014 28827 28828 24379 27134 2177 632 8766 11973 24416 22987 11211 28356 21938 10874 1632 23038 211 74 28829 27445 114 1352 373 13 374 24260 7405 684 7211 418 967 6827 11936 24423 28830 5653 28831 16965 11962 27357 5381 24930 26112 615 6794 9422 8822 5577 4936 150
320 25123 9851 4057 19354 20486 28832 20685 28833 28834 28835 19870 28836 28837 28838 28839 28840 28841 28842 28843 28844 28845
321 5618 24164 13197 28846 26720 4107 10262 78 1647 390 24002 28847 11 12394 1879 1120 1366 1787 28848 7497 7752 28849 9117 12489 23429 79 5459 12865 723 6624 7394 3670 28850 1203 2050 5991 387 27155 8859 28851 28852 1709 5202 5658 5652 12877 26714 28853 23722 2134 13719 6906 6669 28854 1581 28855 21469 28856 12320 28857 10703 6582 12883 2246 28858 8615 12242 576 23278 13746 9342 5720 1293 23965 22041 8124 28859 7334 2374 11945 161 28860 432 445 6767 6751 1582 1754 5560 455 23220 28861 6787 23809 438 28862 23718 6934 5968 15824 8919 13509 1785 13 28863 28864 12898 4659 1140 12944 27162 15358 6397 22964 3303 23329 2746 8517 24783 28865 3389 3509 28866 28867 8960 3702 15406 27763 16058 28868 18028 16447 5184 17056 3333 12371 435 24958 439 6123 1639 28869 5145 10298 5121 28870 18668 25110 28871 28872 28873 19544 5225 5750 24316 6398 26558 28874 2300 5199 8519 28875 28068 1445 5303 7996 28876 7238 1724 2923 28877 27301 13025 24674 26964 13028 10058 1103 26970 1050 11631 27280 28878 28879 11591 8422 5293 4205 16108 1240 24707 27068 12372 7718 9491 7972 28880 28881 28882 28883 7716 7919 28884
322 28885 28886 28887 28888 24012 28126 28889 3301 5495 8344 28890 28891 12236 28892 23669 8383 21617 28603 27766 22134 9529 28893 22152 22160 22105 28894 28895 28896 28897 22196 28898 28899 22213 28900 28901 22104 28902 28903 28904 28905 28906 28907 28908 28909 8347 8319 25024 28910 8404 27747 28911 5489
323 54 10933 5614 28912 1868 12305 25161 28913 28914 696 714 10928 28915 4892 26473 2080 13525 12423 7390 164 2090 163 28916 13635 8248 2126 26829 13752 13705 1417 13997 4958 793 28917 28918 1422 7200 3075 28919 27833 10828 26310 10150 28920 23876 28452 10866 432 28921 27445 26880 987 10823 10838 28922 28275 28923 27672 27684 28924 28925 10827 7207 28926 28927 27784 27514 86 10874 11200
324 28928 12111 23013 6502 28929 438 11920 5837 11921 12384 380 9404 5840 718 9327 820 1553 7214 28930 8361 91
325 12158 13212 5927 4598 2145 12536 2358 503 13462 1431 25470 3077 4856 12445 27040 28931 4863 16828 4879 4341
326 5453 27709 380 1065 28932 167 12607 12423 4565 4922 4916 28868 12866 1023 5987 7458 2102 23424 1148 4911 2407 28933 1641 7856 128 28084 6462 24075 4938 8390 12066 2268 25332 22322 12892 1017 5530 6085 1075 120 28934 693 28935 28936 1452 393 6907 8489 21476 1090 3 606 22040 114 23961 7995
327 8713 6546 376 26823 28937 28938 26593 28939 1378 28940 24572 28941 28449 6316 24587 28942 5931 28943
328 22967 22092 6445 12522 658 22319 25232 27024 5005 27436 8471 27045 28944 2505 4735 28945 28946 8269 2875 2383 28947 28948 28949 28950
329 28951 554 1925 13395 23845 28952 7803 5440 26529 28953 1344 22312 5952 28954 25343 7471 1667 10449 1782 1438 28955 28956 1448 1353 17 43 1034 8064 4922 1426 13736 6620 10190 22104 13986 13575 28957 5419 9745 25337 4982 21876 28958 23113 2547 28959 117 6085 6785 4829 6077 11690 25088 319 12924 7330 6126 28960 23683 2689 2757 1264 28961 8524 9201 8163 14795 23541 28962 4663 21481 8927 23353 15816 28963 15167 5116 28964 15896 1760 8147 28965 28966 2759 8945 8954 28967 5713 22207 28589 5008 5406 28968 28969 8109 23373 254 23495 15618 9202 10149 10648 26943 28970 15394 4910 16397 22273 1486 6509 26756 23132 23080 5697 7856 426 635 7482 956 8550 1607 28971 6912 93 25340 28668 674 6857 28276 9317 12375 3635 6405 28972 6560 709
330 427 12331 5359 13188 7533 9100 13315 13393 9499 28973 166 172 6961 27926 6962 9057 7867 6963 6904 7006 6968 9043 9051 9054 186 2803 9044 28974 10838 7549 27648 12208 7003 7866 12161 24965 6952 5599 28975 28976 8747 28977 21842 12307 8741 114 7005 28978 12396 13 374 150 153 154 23674 28979 28980 28981 28982
331 24962 28983 12988 2798 10723 10502 28193 10508 10513 17879 24532 18043 17880 18275 28984 28985 28986 18660 19061 19140 18873 19337 18875 19003 20907 10313 19346 533 19585 10575 28987 19727 20346 28988 7125 21157 890 28989 21313 12364 28198 28990 28991 21284 28992 28993 28994 26038 28995 28996
332 28997 13166 6568 12287 23835 26771 6719 8263 14211 28998 10190 28999 27782 7024 3073 91 29000 6623 23245 5440 8704 21497 29001
333 5488 716 1931 29002 29003 674 720 10161 7161 1647 4559 718 29004 7292 732 9340 28952 13341 12479 1427 25503 29005 22973 8438 5300 23834 29006 29007 5484 10150 11333 29008 12499 29009 7261 5958 5969 10071 24022 29010 631 7242 29011 8447 11353 1737 23788 9331 27030 28910 29012 29013 9346 28394 29014 29015 5509 29016 29017 1502 8442 11902 8297 29018 11349 5511 23221 26887 7154 29019 26888 5361 7289 8700 192 26484 7159 7168 2238 5524 29020 5520 5529 24042 26832 29021 29022 7157 24399 29023 29024 6009 23231 4998 8305 5530 27876 5291 28467 23175 8913 29025 10717 5532 11784 29026 29027 5296 5535 7174 29028 7164 23262 11384 7165 5538 29029 12248 29030 29031 27075 27866 29032 7170 1464 11385 11369 11386 12061 2723 23857 5332 2122 12244 7169 5316 5494 12245 29033 11370 11371 1077 5546 28466 29034 11373 5550 5545 10711 5566 1087 29035 28278 11639 29036 28604 27283 29037 2423 7722 25464 11305 29038 11383 2394 29039 12081 6065 751 5551 29040 29041 11382 780 9184 11388 2793 24424 6958 27874 23290 7440 23691 2485 29042 1113 29043 4645 10715 7783 7771 29044 8921 2556 2697 23946 11993 15016 21946 29045 2563 1743 29046 4500 29047 3135 3386 11394 29048 12252 4832 2605 2593 2512 29049 29050 12097 29051 26360 27040 2795 2673 29052 8433 8940 11406 781 2754 9178 24051 10217 2894 12093 29053 29054 9171 29055 29056 2893 29057 7779 951 29058 3044 27042 28507 29059 2840 7345 29060 23337 29061 29062 3014 4643 11410 29063 7842 29064 2887 29065 24377 9195 2805 24054 3042 2937 9205 2889 10736 21673 22363 29066 23381 24440 3048 11419 10251 21963 27862 29067 29068 23350 12094 5716 29069 9208 29070 24457 10720 16624 11512 23281 11418 11421 29071 3180 29072 2977 29073 29074 29075 3160 29076 3337 3314 29077 5263 11434 11435 11440 29078 11433 12553 3404 3385 11450 22190 29079 3125 3474 3235 7363 3727 3523 6172 29080 3413 24498
334 26064 1023 28117 1688 12121 24230 7267 6444 29081 1640 23304 28271 29082 718 125 447 233 373 1967 29083 24118 11208 1787 6544 8303 6530 29084 4956 9099 29085 29086 1711 1897 654 9317 1110 7301 13063 7853 2521 29087 29088 1349 2138 29089 1104 12231 25017 29090 6459 23061 29091 26270 17258 23319 10844 7761 13655 12049 11693 8336 1631 6320 1367 413 29092 29093 12048 13816 12171 29094 10029 10763 11367 5316 4817 27145 2723 11386 452 4283 7322 4938 29095 29096 8577 26843 29097 29098 29099 11394 24333 29100 11756 781 26307 2840 2893 359 14265 693 24261 11786 24457 7780 15386 2410 11421 3139 2082 5743 22378 4690 793 27772 22380 795 21677 29101 29102 29103 8373 757 1774 3432 26980 11465 3725 3816 29104 29105 26326 29106 8981 3985 29107 29108 12035 29109 3437 24540 29110 29111 29112 29113 26614 29114 12114 4862 7195 29115 29116 4401 3723 8403 8360 905 4097 29117 2261 29118 29119 29120 29121 11916 29122 21042 22467 10344 13163 29123 29124 10373 29125 907 27587 1810 29126 29127 1475 29128 29129 29130 10082 29131 29132 29133 29134 921 29135 29136 29137 29138 21622 2619 22520 28339 29139 24194 29140 29141 21656 29142 29143 29144 936 9002 29145 29146 29147 29148 22619 29149 11148 29150 29151 29152 22664 29153 11149 29154 29155 29156 29157 29158 23525 26314 29159 29160 28159 29161 29162 29163 29164 3563 29165 27180 28971 29166 29167 29168 29169 29170 29171 29172 29173 28219 29174 29175 29176 29177 8937 21170 27071 29178 29179 29180 29181 5684 29182 29183 29184 8696 29185 29186 29187 29188 29189 29190 29191 29192 25965 29193 6186 29194 23781 29195 11914 29196 29197 29198 26656 29199 29200 29201 29202 29203 22895 29204 29205 29206 29207 29208 29209 29210 29211 29212 932 29213 29214 6525 29215 29216 29217
335 1916 29039 8910 5472 29218 5546 29219 29026 29220 29221 3665 26922 3881 3886 22000 4225 4368 29222 27253 9272 29223 2096 29224
336 26268 7447 4554 8395 8920 5663 8005 725 1890 22128 10455 21613 25169 21650 25171 6732 29225 7978 10698 29226 1104 6987 427 26569 7342 23714 12756 29227 28184 5464 7230 679 8884 29228 29229 29230 5599 10439 22030
337 29231 25241 29232 21483 29233 7872 5353 7602 21770 7200 13194 2131 9890 10427 8650 7603 10832 9073 29234 24992 27967 25524 7605 9106 9085 13193 29235 7541 7542 6415 6279 1868 13229 5584 29236 10932 29237 29238 29239 8653 29240 7533 29241 9582 13269 5627 6999 13256 13272 13217 10877 10885 13270 27938 775 13290 11014 13280 13278 13279 10876 8619 7649 9562 13304 9105 21815 9097 28698 13308 6513 7186 13244 10879 13299 29242 5351 13171 13338 5435 9032 9110 29243 13317 10881 27966 13354 29244 29245 13339 9107 9510 13346 13348 11015 8654 8649 13373 13347 13331 7613 13377 27928 4320 9113 90 29246 13367 3107 9115 29247 29248 687 8661 12176 6601 13393 29249 13392 7650 13410 9532 29250 13396 13323 13402 13433 29251 9120 29252 131 13303 9121 7543 7875 9511 10887 13448 13172 206 25131 7564 7616 10888 13428 7609 5634 13460 13484 7537 13469 29253 7394 27983 7551 13475 175 13449 7575 13511 9600 11017 13499 7587 25141 7589 13470 138 13452 7618 13514 13535 13531 9591 27986 13526 9578 13546 29254 9036 9596 13523 29255 13524 7023 142 11018 8659 7588 9127 13613 2080 9135 9139 10889 13648 9134 13597 13757 9690 13813 13865 13897 6687 13938 461 3134 14199 29256 14166 27776 12181 14402 14645 14977 29257 29258 29259 9050 6429 27886 29260 9499
338 29261 10973 8075 10988 10975 7796 10981 6408 10990 7794 8273 7825 11224 10987 9973 6417 7510 6419 25542 11227 10989 11226 11228 10997 7805 11232 25557 25548 29262 7806 11233 25552 11225 7808 13586 10974 29263 6438 29264 183 7818 7826 7823 7819 11268 10984 7800 11222 25543 7821 24592 11267 10983 29265 11273 270 6436 7815 29266 10978 7409 27722 8099 10982 25824 6442 969 12119 8097 23828
339 23903 10802 29267 29268 29269 8735 4892 6927 6906 88 27529 21989 56 7432 1866 23156 29270 394 24266 29271 12389 27689 21859 21861 29272 29273 12462 27913 28361 12459 5429 28387 29274 29275 24273 5649 21812 1241 15 28974 670 11200 51 8725 21814
340 10800 5350 12433 6572 7992 4552 716 5362 1913 8599 6565 674 20448 8589 7985 7001 26883 25224 156 8103 10766 9148 27862 12313 8005 1970 22080 22082 820 5335 29276 7776 29277 27531 8076 24214 7514 27115 366 4886 1670 391 7745 1673 23899 28830 5414 4555 9117 7263 775 24465 13362 12766 29278 22092 7270 24885 29279 29280 1573 29281 10756 29282 12480 29283 8613 21858 12342 25026 7259 41 27823 21860 21862 1492 21859 7034 12383 12404 21863 12435 6564 4933 147 6658 13582 13700 21840 4587 24916 180 29284 4951 24177 29285 10689 29286 29287 6453 13903 26783 1420 11792 13824 5286 24283 8502 7290 11673 7250 7307 2338 21503 13391 8532 6375 29288 5647 12150 29289 29290 28451 24933 7839 8530 4647 2321 29291 6786 2619 6517 24920 29292 24451 16035 11787 15771 241 167 8545 1711 29293 5540
341 5449 1390 5339 5942 1356 8434 29294 1111 25313 723 1112 8558 1656 1787 4956 24091 12524 975 8896 646 527 29295 29296 1751 5329 1372 1403 974 21667 24350 10689 29297 6624 24563 5425 27131 8005 7986 8745 24703 1650 10449 29298 28184 24443 7290 746 6379 6030 23648 29299 7042 29300 4604 29301 28138 29302 979 5698 650 29303 6918 10769 5805 5237 3284 10874 10824 24264 25053 373 114 12048 1658 7331 5438 1120 1725 28086 28076 28182 8895 28180 29304 12485 4107 22313 8838 374 387 2115 29286 22341 4988 432 4610 4494 28327 726 8869 8870 12871 6375 29305 10060 29306 2374 7751 28450 23600 29307 6341 5699 2102 5117 13 5097 5286 6397 29308 2430 6787 5991 15824 11353 8444 21972 12919 24526 25444 27215 24604 29309 29310 29311 25450 25451 29312 10198 28107 8920 29313 29314 28099 24648 29315 29316 29317 29318 29319 29320 10439 10443 11771 29321 29322 24633 24579 24398 29323 29324 29325 29326 29327 29328 29329 21610 11718 26985 11708 29330 29331 29332 27295 11713 11711 11709 11714 29333 3004 11698 28116 29334 29335 28413 12944 29336 11712 29337 1817 28101 29338 11715 11716 23819 5702 8030 21663 29339 8928 29340 29341 29342 28067 10457 12949 23885 11719 29343 29344 17 29345 21613 11941 8391 29346 23730 5235 11753 23463 29347 2181 29348 29349 29350 14616 1281 6356 8848 26473 5110 1663 22181 22202 29351 29352 29353 12802 29354 29355 29356 29357 29358 23146
342 8870 8633 9029 5631 11943 28380 29359 25389 29360 25323 975 6568 7474 5421 6569 12423 8248 25411 29361 29362 29363 29364 28999 12430 24285 6632 6603 12402 29365 6624 6680 4897 6631 387 5821 17073 10826 12418 29366 24764 26072 11279 29367 5622 28384 29368 373 13 114 29369 10157 10408 5111 29370 25320 26275 6904 5113 374 29371 29372 28300 29000 8623 8624 29373 11951 8323 21757 25318 11936 8634 29374 8621 427
343 5679 11783 23693 22129 438 1976 7842 5201 5284 26528 1787 22966 13092 4559 8861 12338 23192 26777 8030 7260 6301 10859 4956 527 10793 5281 5685 26484 11 1104 7161 4938 1431 5665 7243 29375 29376 7332 1713 2800 27445 6374 6399 5094 11680
344 7212 29377 28320 23153 8360 26820 1720 12776 23818 29378 12167 28975 6559 11956 1041 1365 6917 6912 24869 24721 4246 29379 12153 5599 973 8012 1104 399 12589 64 26644 25535 24955 23694 1649 5101 3353 7505 29380
345 5493 1006 5471 10161 8343 8890 2936 29381 29382 21957 26485 404 10703 382 29383 954
346 1916 551 8526 1063 5362 11336 29384 7161 5352 10455 6546 1954 21611 7398 7253 7261 7262 2314 161 23999 29385 6020 9199 11361 9363 7042 29386 8302 11673 8721 7312 13722 8334 658 7167 8391 9344 2177 7139 7243 5328 8280 29387 26826 7289 28114 8426 6528 26746 7504 5964 28886 22071 29388 29389 696 700 10409 8319
347 95 628 24855 1164 1073 5477 5347 739 10762 967 676 117 25031 29390 29391 12034 23656 13395 22075 12860 686 22975 8032 2393 4656 29392 8843 6657 29393 6533 5663 6870 27654 7393 1273 8451 27101 25409 7408 2150 1127 22321 26755 22098 233 27735 1412 2036 29394 6046 13419 28527 7458 29395 26773 1760 4585 28514 9668 6659 161 6637 220 9342 8519 29396 315 12278 5989 9371 27540 23076 4963 22096 13706 13685 4973 29397 23075 184 9663 29398 29399 6719 29400 1770 25038 14000 23823 6043 14031 25626 1168 1232 2223 8507 14115 431 29401 1255 29402 3374 29403 14232 27030 28233 6361 29404 5008 29405 7216 638 27178 6085 8473 22079 2331 1212 1620 29406 14424 14410 29407 1125 8517 28936 24456 29408 23685 5102 29409 1621 6920 29410 14589 14586 2365 8839 28272 28586 13986 6073 171 28566 29411 1657 14 29412 5414 8573 5742 29413 26728 4911 7254 1384 13701 240 12901 12280 29414 12607 12592 29016 520 8570 28932 1108 25744 28358 76 29415 5839 29416 29417 14640 12136 6452 23083 1383 29418 26644 13381 180 1686 307 9780 7770 1975 29419 6763 1700 29420 25060 27358 1373 14767 29358 24780 21876 27180 167 661 26105 1138 28846 14861 6528 1475 25059 14862 1646 1641 12031 5936 678 29421 10799 26715 605 23979 1346 29422 8924 1652 23972 29423 1780 23970 1348 5043 7415 23782 6780 22030 22349 1165 654 1791 26124 319 14622 2320 15254 7497 2501 23969 7234 22207 29424 29425 23630 11637 15277 1061 29426 1 5438 24931 29427 6086 1752 641 8163 21828 23423 29428 28357 10225 1707 8543 2903 24922 27701 23787 29429 29430 29431 25073 15924 27108 29432 23250 23084 1736 23495 27705 29433 29434 29127 16115 8527 16130 25151 29435 29436 622 23373 6915 72 29437 29438 7225 7752 29439 1694 28955 11629 29440 16416 26782 5713 4907 2260 23388 16253 8922 8546 29441 26071 12947 1699 11782 8545 28937 29442 1761 17637 12946 12103 29443 28522 8886 9419 29444 3285 23965 27769 29445 5334 423 16783 5136 15823 5138 1602 16756 29446 1048 21524 29447 12606 5084 9220 8868 1252 10223 8278 6890 8961 22088 5228 28533 24737 956 1368 28865 12956 8565 1293 986 1744 27562 5058 26724 29448 10724 480 29449 3234 11941 453 444 1185 9462 17458 17359 10709 1726 5794 17523 24778 1199 5446 12202 9430 8574 1701 26674 415 29450 11795 1680 29451 11631 29452 14712 12794 10163 5976 5425 7299 27579 29453 6895 5171 17915 22223 12795 3740 8960 15331 29454 836 29455 29456 3974 29457 29458 29459 29460 28540 10584 28490 18155 29461 3856 29462 18027 29463 10646 12908 973 3679 29464 3911 28544 10650 29465 19760 22231 18160 10590 29466 12808 4291 1448 29467 22236 8585 29468 27808 4708 12692 18474 1784 20001 8986 29469 6468 29470 26678 29471 29472 29473 1279 10651 29474 29475 29476 23636 29477 10591 29478 27348 29479 29480 29481 29482 29483 21231 10576 20118 29484 13015 29485 22269 29486 1274 29487 6465 1323 10592 12828 29488 12455 23638 1337 29489 20958 29490 12837 20746 29491 6179 29492 29493 13003 29494 21220 29495 29496 11088
348 3 13067 13068 5505 9975 7042 2875 427 29497 7290 6857 6040 7046 22349 12518 2557 780 707 23977 7329 463 3004 462 29498 9221 11322 800 3483 1836 29499 9420 29500 6474 29501 7079 29502 29503 29504 4142 1233
349 5376 11732 23848 21812 24675 8326 29505 10170 6275 5738 29506 24434 21616 172 29507 23845 29508 29509 379 7995 7975 29510 24701 1367 28382 28383 29511 427 3386 1023 8335 1872 6329 8749 4956 8354 652 13210 27171 25302 18255 23270 5406 7745 28330 7803 5629 5985 29512 29513 4323 29514 6387 24702 27317 23186 5339 4783 29515 1503 21585 9559 29516 4796 1040 13336 29517 27729 29518 24279 1200 5581 5349 11016 24821 20504 10793 25404 647 1592 29519 23237 24757 29520 7495 6257 6581 22963 27728 7979 15638 5343 25222 1886 13066 29521 29522 6573 6511 5983 5346 6027 1603 4939 1478 6602 10929 5962 7269 6580 1567 4787 6542 13212 12333 7299 29523 4801 1241 615 26577 13549 1573 21840 8205 14818 8048 1070 6595 29524 4806 572 13362 1606 7221 9092 29525 8420 6644 9606 13365 5447 7145 7991 13345 16562 10930 149 21499 13427 1564 190 7042 29526 26761 627 12906 5987 1458 29527 29528 1542 6405 29529 1094 10813 13080 1761 13260 29530 8066 6450 9628 13637 551 29531 5641 11627 25455 6406 28485 29532 8204 9656 7230 26766 29411 23022 10692 28268 1657 8502 13756 13554 29533 1424 90 29534 26794 29535 28264 1975 29536 6669 6658 4805 1164 8397 5392 1643 6929 28271 5982 6549 13081 29537 29538 29539 12286 29540 14210 2313 1330 29541 8526 23205 5531 24178 1168 10869 968 432 29542 13880 29543 6714 7281 13859 11970 8482 9753 2441 5450 24839 1954 18052 1031 29544 2374 21869 6042 21872 4997 8112 29545 14106 3067 2079 24778 6722 1803 1801 696 6520 1622 12347 14652 1127 9430 628 27178 9691 1370 6096 29546 2221 6468 209 29547 7288 8129 780 9533 1237 13090 12897 7472 13398 9561 11307 6052 11024 14214 1352 6899 29548 29549 700 8051 24117 29550 6762 438 29551 9714 2222 2130 29552 1915 8263 1630 5562 12895 14871 29553 23115 1018 15194 6517 633 14517 10409 3626 2427 28848 1 4804 1558 2508 28955 29554 1618 1431 29555 8522 1257 3374 14300 1595 29556 6930 8433 29557 12866 14015 28692 23741 27195 11648 29558 10709 25409 5692 455 13325 15067 29559 1789 7044 29560 13636 6057 14804 9720 6786 29561 8520 26133 2198 6352 13629 12507 28388 2358 24262 29562 5648 8151 1155 6141 6486 29563 21836 13187 995 29564 2123 15144 29565 13 13264 16101 12913 617 8396 14161 7709 1566 5839 1402 21652 240 6407 29566 28697 15406 1734 6902 28135 28401 7748 576 29567 14449 2710 5556 8427 3323 1008 11661 6792 21626 29568 11414 15191 1815 29569 8142 2402 2639 1172 1726 15931 23429 25324 7375 29570 29571 233 29572 1140 16138 29573 25014 9358 11888 5315 25054 15199 15209 13242 16946 14240 25383 9457 27094 29574 29575 2832 5654 4839 23233 5705 29576 29430 29577 8460 12659 8952 1443 686 794 8026 5097 29578 1820 27226 14784 444 5113 29579 29580 8748 8738 23803 8758 22357 140 12318 24730 15266 12929 15324 17205 28911 25066 10723 6016 79 1125 15723 1185 15908 23838 3509 8964 23724 12 29581 6021 23857 16914 29582 6785 8140 27284 27609 17056 14904 11987 8562 10474 16580 15679 26888 21524 29583 13547 16065 8742 23438 1252 15864 28402 15309 26574 26140 3019 24776 27811 852 3283 28904 7877 21846 24915 15963 16157 29584 16174 29585 3177 1440 8563 26174 10665 4908 9653 26930 29586 8960 14024 239 8868 3102 16801 8561 16335 28468 21613 29587 4996
350 22031 23653 29588 29589 7042 647 118 81 62 23787 22999 11314 103 23838 26534 1063 7728 17 2069 12480 5477 7995 7196 1101 21651 11631 90 13423 7773 27103 29404 5980 6651 29590 29591 29592 22098 5987 1754 4804 8859 679 38 6874 23984 29593 12184 5506 1242 4942 29594 604 8263 22338 13964 5530 1363 8305 5347 6049 8929 14232 13986 136 13575 1621 8903 28512 22133 1653 4803 8149 8150 29595 4979 12348 12995 11923 28553 29405 1114 29439 1688 5102 28292 15679 12929 1180 12924 29596 29597 2521 29598 3229 5063 3628 10024 1455 2562 5713 29599 28579 29600 5149 29601 1308 6168 22228 8190 23182 6469 29602 28905 29603 967 12258 170 18635 14923 8865 29604 240 5117 29605 25054 394 13092 607
351 6553 29606 23021 23136 6618 427 24366 25299 23993 6379 395 5421 10144 29607 12524 22998 29608 6522 29609 394 25415 527 1885 29610 5993 29611 114 25062 373 28281 7015 29612 5359 5995 6748 29613 28131 24374 9645 6381 13386 23955 8896 7745 7506 8343 8371 990 14286 29614 13 6103 2580 12516 6071 6767 998 2374 15186 5066 29615 5114 29616 29617 26751 432 3680 15901 439 14343 16138 25372 27302 29618 7739 779 5258 25106 28880 6501 29619 25440 6978 6540 28941 27642 26242 10764 29620 409 6334 6335 6336 6535
352 24946 8836 390 114 1344 1709 1454 978 73 6344 7732 10799 7782 373 1383 388 27103 693 395 8253 13 8887 1769 22990 725 5684 5720 374 29621 1701 24166 29622 196 1034 1269 7478 4998 29623 6785 8140 1140 1787 1014 7477 29624
353 5339 10170 11270 1352 1924 10878 1913 6563 723 29625 10755 774 7410 24374 7519 29626 29627 7536 81 10879 6658 12883 196 29628 6637 12202 182 29629 7196 107 123 10193 2246 29630 29631 12371 4036
354 1069 27356 1970 5335 29632 10006 23791 6564 8620 10174 572 387 28590 29633 29634 29635
355 1565 9510 41 5445 5481 7015 5457 26161 1557 5581 10171 7997 9078 29636 23873 5498 7996 10929 23655 13188 121 6633 13269 5823 6582 6567 6568 13293 27664 9102 6584 2024 2000 11012 23674 28979 6602 9600 92 7200 7399 13245 25066 4937 11015 25141 13510 29637 6620 8066 4939 6634 190 2090 4938 6631 9654 6733 432 439 435 9646 13705 13760 13886 8147 3785 6623 10867 6603 5604 5605 7024 7990 27744 954 7866 6983 8739 5357 6588 6579 6578 1603
356 9073 7537 9081 12331 9032 7608 5626 21863 29638 9045 29257 20735 5591 9047 24990 25125 10433 29639 29640 29641 186 132 25126 25132 21909 9046 9056 29642 429 10937 25168 467 9152 29643 29644 226 7205 29645 9146 25281 29646 9162
357 1492 1868 6947 39 12470 1069 7028 10931 4892 21868 9565 5445 566 12032 8596 6961 29647 27244 3165 7537 3106 8599 121 111 13179 9099 29648 29649 5363 156 132 21863 29003 12037 5429 8004 7985 12866 563 180 13208 267 1944 12331 96 9890 13313 24236 21994 29650 662 278 24803 13387 22042 23313 9626 12423 6564 9595 24403 126 4944 276 4932 324 4958 1607 6590 21847 13576 6858 6886 13611 25136 21853 8493 23081 12276 29651 9807 15478 15103 954 29652 29653 20477 22364 25358 5380 5597 22061 21859 21800 100 6926 50 6927 66 8749 7200 5608 12863 23269 29654 8631 5607 8630 23331 29366 8755 23328 6909 8781 23333 23340 23324 23336 23332 8657 5611 31 6732 12429 29389 8629 28522 8622 56 29655 8619 23343 26589 25344 7500 29656 12306 29657 27511 29658 7021 12323 6623 186
358 27211 1063 4803 4826 1224 1754 1200 1641 1361 1655 29659 679 29660 6099 8840 5949 8354 1363 29661 29662 21626 603 1034 103 29384 5965 29663 29664 8481 13092 23802 7129 29665 29666 5505 23067 8845 10432 28444 8092 29667 29668 29378 23025 5470 5101 6929 5654 652 9360 710 712 635 7642 695 11881 9341 9397 148 9385
359 29669 29670 25524 5638 9026 13221 13215 9510 7028 29237 6606 13272 13367 13377 13433 13439 29671 3566 8656 29672 29673 29674 7600 29675 27951 29676 29677 29678 28698
360 7028 6485 537 21770 56 5453 5353 5507 103 25025 28698 6506 427 7212 26883 28575 10147 30 4320 29234 9890 29671 10944 29679 5703 23197 674 29670 25276 29680 25260 1870 29681 13193 13192 13256 775 13269 22312 41 2685 29682 29683 7551 29684 17 29685 17996 5626 21613 239 3086 25261 13412 12207 21781 29686 7980 7563 29687 102 9050 48 6411 6414 257 29688 12092 38 26153 10861 29689 29690 29257 25254 9049 6965 6272 21790 24992 393 6528 10818 22025 29691 7204 29692 15533 27372 7569 22967 7002 7522 29693 7553 22027 7489 631 10932 29259 29694 10807 29695 21782 29696 1320 21786 29697 29698 10418 111 10866 10953 29699 26624 29700 1428 27121 28794 25281
361 6408 6410 28695 6416 25543 10992 6418 6419 6421 25558 25560 12142 7808 10998 25596 29701 6412 6427 6426 12488 183 6433 6437 6435 270 6439 29264
362 1269 1925 29702 1405 13266 9571 774 8343 28371 26215 387 8371 990 27665 11668 5529 6351 6523 13088 29703 21502 2374 29704 23148 21907 13 24923 24783 29705 27280 27299 29706 27318 12753 29707 23599 23607 29708 29709 27230 3072 29710 29711 29712 8407 8410 29713 29714 15997 29715 29716 7972 29717 7103 29718 29719 29720 10957
363 6592 27091 4948 6983 7015 5442 6978 4981 644 12343 5404 3297 5581 1925 7996 986 25063 6863 23873 121 24801 4907 5823 6633 6729 12177 13266 1546 12037 25065 6582 8756 23015 22092 1561 10438 6571 13262 28586 24921 6602 7399 1417 8282 23989 5476 775 26067 4930 2044 4935 6601 9595 8762 1573 8115 4944 13464 1602 4937 6620 8102 13435 13385 4938 13542 1601 179 8066 1428 5991 10163 5506 4592 328 6684 6648 13539 13556 9631 6677 4966 2155 24831 6671 13482 23209 23216 168 2234 2095 3067 223 6727 13801 4973 4976 4974 6720 13786 9658 13868 25069 12057 13940 5370 22223 6708 439 192 6718 8278 9920 13916 6637 12202 13952 2384 29721 995 1207 6721 4917 4975 5529 25070 14021 5520 13986 15910 14029 14177 2243 10716 29722 21851 13905 14244 6351 1582 8130 5008 14313 13670 3234 29723 6775 14340 254 8000 1987 26091 9678 9607 596 6899 5014 5696 2122 6761 9695 25074 14498 25077 6766 5020 9391 6763 23317 2580 4945 29724 29725 29726 23279 8168 325 8734 288 12046 25079 999 2383 8134 6774 14809 6623 6292 8150 29727 9433 14877 28278 14883 310 15061 5041 7339 23445 6079 9432 29728 29729 29730 2602 5058 15053 8064 9437 12914 15201 7024 9846 29051 15203 5605 6567 8152 6719 15325 6902 15358 6634 5604 15180 9167 2757 5381 6877 23339 1816 5411 2759 29731 15492 8814 8164 2849 2853 1826 9177 5077 12934 15747 2456 9448 15863 15816 5088 15896 355 15968 3014 8169 8170 8171 9879 16081 16073 8158 25085 8823 14118 3072 15904 16069 23026 16195 11424 16276 4582 3076 25091 16480 3236 25093 16347 16387 16354 12103 7053 16715 5138 16757 29732 16781 16783 3274 14451 6882 5752 3349 25076 29220 17073 6890 29733 16882 29734 17134 3128 7730 3237 963 15483 29735 29736 29737 17528 3630 3627 17449 17638 8191 17708 23477 3785 5171 23479 12677 29738 6898 5161 17753 18112 17898 18156
364 409 4337 23814 24153 5182 24943 2158 4598 551 5619 11361 9986 27049 26789 12893 7170 24284 6090 5604 25370 3991 4857
365 54 551 12592 4932 167 17403 16501 5204 28343 29739 29740 20888 13039 29741 24943 25041 670 10948 12328 6913 25340 388 7199 29742 10773 5505 6664 23269 43 22973 31 3464 1353 24955 29743 1555 22379
366 29744 186 27770 9024 23649 27473 191 1607 27778 7569 29745 7498 28094 29298 6589 6590 6980 29746 27649 5406 12032 1565 24230 27647 25199 5346 7500 29747 29748 26161 29749 29 6806 10273 11942 11943 29750 5350 979 6315 12409 13245 6924 7013 7011 29751 7745 13198 29752 11202 26704 29753 1508 29241 7008 5151 1572 8769 29092 7010 24247 12378 29754 12379 29755 12403 251 208 12415 26185 12321 7512 29756 23229 1688 29757 23929 21811 12294 21810 6591 29758 29000 11015 12402 7803 1874 3085 29759 5616 5615 5581 278 21808 5392 239 5584 8728 563 9578 5705 29760 10930 9510 564 5568 670 96 49 13322 27359 6922 21804 29761 6921 77 12347 1641 10867 344 58 9600 13484 5742 12428 5823 25293 7496 6620 9654 7997 9596 21837 4939 286 6641 13657 1120 190 26824 6664 6601 6665 13381 354 29633 8067 6666 8037 11021 11022 29762 29763 13785 5776 9646 12048 225 353 29764 9659 21980 7540 27903 12 5597 12349 13810 13781 1069 29765 7 13629 13724 29766 165 29418 27881 429 23 209 162 12406 13917 29767 0 1765 13273 29768 21838 29769 29770 23029 29771 222 12276 434 6714 335 13601 8493 1947 124 50 6042 679 8126 21869 14020 14054 29772 159 7426 4938 14176 9587 1101 8507 4609 6043 13359 348 9130 13665 8065 9700 14087 141 1073 14226 9722 29289 7313 29773 1090 249 6736 13800 6827 14256 13250 14429 13313 29399 14519 14240 22042 9747 23081 9773 12323 6751 12353 7314 29774 2374 6761 6769 635 9758 14508 27532 9803 12895 27546 10797 14726 9785 10804 6757 2041 29775 29776 6671 6734 29777 9795 14661 6760 7546 6687 14990 21867 2502 5991 9815 3103 7878 14545 14439 23298 15010 10853 1830 14989 9817 12336 9673 6786 10812 9828 14562 23299 456 14772 94 112 8136 15379 8517 15484 2602 14374 29778 9819 14804 9856 2648 15560 7441 23658
367 6537 23030 23037 6521 6522 21685 21739 21752 29779 23049 29780 29781 29782 21936 21937 29783 21940 25419 6808 25418 25421 25434 25435 25437 25440 25436 29784 11973 25417 29785 29786 24374 29787 29788 29789 29790 29611 29791 7501 4881 5223 21686 29792 29793 29794 12752 774 8866 29795 5829 29796 21756 23038 29797 29798 24324 11880 6810 11879 6286 24677 10411 25042 29799 2370 29800 16964 29801 2220 24452 29802 29803 25408 21939 25415 21938 27140 11626 29804 29805 29806 29807 29808 28185 29809 696 700 23039 10409 29810 29811
368 25401 12429 29812 29813 181 5615 29814 11912 5405 26886 11200 25353 13179 5448 13707 14726 9834 14976 8192 11995 12947 11080 7891 12592 3270 29815 5607 29816
369 106 1069 29817 5434 29351 7199 13188 12310 10171 56 721 684 21988 66 7984 7193 29818 7186 6505 5602 6989 9510 7013 12029 4894 121 12208 29622 24009 6949 12316 7611 9055 5405 6828 26162 8619 9056 17 596 5595 48 29819 775 44 25264 22025 29820 29821 12313 29260 7866 9578 226 27964 12037 29822 1373 149 12317 29823 25267 6513 27644 344 9600 9596 92 2062 90 4933 8282
370 29824 403 675 6346 21646 11693 4795 1876 11916 17372 11929 29825 29826 8328 380 379 1367 7332 1364 21634 3670 23984 2521 21610 8391 21613 20788 1787 29827 1382 8318 11642 1486 6932 1754 9308 1750 1664 29828 29227 29668 29829 11883 1788 29830 1635 1783 1639 13078 11701 18097 6320 21672 1692 29831 12165 26733 11704 9572 29832 29833 7732 12160 1573 29834 8836 13092 12162 27281 29835 24354 1074 1768 8573 11783 6299 24102 27021 11881 8872 28098 1712 982 29836 27101 29346 1695 1625 2749 29837 7412 29838 29839 1103 1652 168 1688 1386 11296 7731 29840 29450 310 355 3785 1661 28520 5066 27774 1634 29841 23522 29842 1641 1666 1438 29843 1441 1810 6448 24891 1753 29844 5645 29845 8722 28522 28455 1618 23986 5083 29846 980 5685 29847 1689 29525 5670 29848 5252 16513 6933 6047 5337 13799 29849 23722 27095 28853 1775 29850 8476 5203 23630 1700 23724 8723 1789 23723 8721 1782 12166 6073 1751 29851 29852 29853 29854 29855 29856 1657 29857 12169 1643 29858 7742 1285 28830 4929 4119 3284 29859 22139 1229 23741 1642 4479 1619 2114 24703 1233 29379 23123 27771 527 1389 27151 27443 5669 25410 395 1371 25448 1709 5202 8732 23143 11948 8798 23126 13072 21637 1104 29860 11888 2426 1739 29861 605 29862 27769 27274 28419 29863
371 21937 29783 29793 21938 25429 12853 28056 25417 22982 21806 24374 25430 25431 1378 960 21826 28061 26303 29864 8102 14170 3537 23039 28185 29809 29865 25424 26241
372 5579 6031 29866 10629 29867 19174 27883 16621 22005 9924 8093 16623 18817 29868 22228 16404 10609 29869 29870 29871 22171 404
373 5351 71 5354 13197 13188 1557 7996 5581 7997 6563 6729 23873 9569 121 12856 6619 6928 10929 5584 5823 13254 13258 6582 12313 13269 8109 8756 8107 6516 9035 6571 6513 2000 7392 6591 13315 5776 8048 13335 13322 9590 6644 2024 2054 10930 9600 4939 6602 12865 1601 6601 1573 8114 13422 4944 25141 8115 2080 6656 4937 6620 4938 8066 6637 6517 13516 12342 190 4945 13559 13582 6634 6631 13556 7390 4951 6733 9617 13583 13587 8057 6636 179 13598 25067 13627 4924 13629 9628 6669 8122 3067 13670 13705 6653 13719 22051 9690 6671 13760 13769 13793 13800 6720 168 13831 13874 6701 13860 8042 6687 6704 6743 13903 209 4977 13916 6708 4997 6710 192 7429 13985 13997 14000 995 14018 10190 14019 6723 14066 14071 6724 14106 14075 9743 21851 14177 6734 3234 2362 23685 3097 6783 3103 10819 5041 5043 15067 8160 21903 15160 6902 3228 15905 21910 6295 6906 29872 7982 4323 21894 5448 31 29873 24156 188 8278 11203 11279 10867 5404 4948 26162 987 8708 6597 29874 11278 172 28647 2855 9422 5374 29875 5401 29876 186 8051 12334 7024 9054 6665 28290 6904 9055 6590 29877 9057 24809 5607 24778 24815 6603 6666 7990 7992 7866 9059 181 8071 6711 11200 86 6600 5616 9041 8739 8656 6676 9062 6795 5405 12320 8633 7984 29232 1603 5615 29606 8780 25293 5476 6618 29637 7410 27522 48 9028 7491
374 23773 8526 5481 27090 5453 4892 5477 10765 1925 6506 1009 5581 14 4555 12300 121 5498 4907 723 1020 5584 7875 4922 6513 4565 90 3 22974 775 8343 1868 22092 11353 6601 4930 8486 29878 13266 4938 4598 656 956 29879 29880 12755 7856 3085 29881 638 29882 23707 7720 382 7730 29883 29884 29885 7227 23013 374 6906 8323 4884 954 12320
375 29886 1332 21476 7720 29887 1603 4554 1574 28067 5614 29888 29000 12402 29889 5615 5616 3085 2832 6601 5581 6734 6760 2648 6671 3066 25095 29890 29891 24909 29892 23785 5438 520 1095 1096 1103 29893 1066 5694 28522 29894 6493 29895 1068 1062 1658 6030 1763 1180 7331 645 29896 1725 12288 1366 28848 1364 1271 24602 12862 26776 29897 27197
376 8002 29898 5355 1868 29899 6654 5581 25319 25323 29900 7430 5363 723 25411 6504 6586 6516 6513 29901 8051 6571 8343 24810 10182 9595 28379 24805 6601 12340 6691 13679 6716 4988 25315 14110 14272 6734 14651 2403 445 14748 23277 26075 22957 29362 987 5615 29902
377 27528 6 775 2455 5042 29903 7379 16711 16756 29904 12605 1836 29905 29906 26097 17523 26668 28612 10637 5841 5814 17857 4064 8215 18585 756 10590 10543 22236 6831 29907 4437 18806 805 29908 18589 29909 29910 19197 11080 29911 13004 29912 5876 10566 4746 29913 29914 20092 10322 1238 12826 10576 12820 10327 29915 29916 29917 26134 11122 11532 29918 29919 22008 12750 20608 29920 10605 29921 8241 21158 20954 21534 21041 29922 20746 10368 26685 7125 29923 10374 29924 29925 22298 13037 21565 22290 10365 21562 29926 29927 29928 29929 10639 29930 29931 29932 29933 29934 29935 29936 28788 29937 29938 29939 29940 29941 29942 29943 29944 10591 29945 29946 29947 29948 29949 29950 29951 29952 29953 29954 10662 29955 29956 29957 29958 29959 10910 29960 29961 29962 29963 29964 29965 29966 29967 29968 29969 29970
378 29971 12300 7420 167 8430 12607 5983 118 136 8248 13805 161 21819 6077 8144 26186 6137 2730 75 7478 29972 26719 1075 29973 29974 6405 409 5466 7493 29975 606 374 316 7225 7995 1200 22368 89 10952 29976
379 29977 29227 5964 380 379 1647 27028 438 26767 7504 5669 7139 21650 673 1389 28940 2410 1709 11948 6544 24505 23698 8318 29978 13057 417 8391 1717 8896 24139 22986 25465 2186 29979 11693 29980 72 1707 1614 23492 1485 23731 1670 29981 1424 395 1457
380 29982 154 389 7203 29983 5381 1788 29984 8015 29985 29986 24007 640 978 2773 29987 1364 5458 150 644 8724 153 11665 1626 3629
381 24951 29988 29989 27860 8850 24939 29990 12048 29991 6040 29992 29993 29994 29995 29996 2735 29997 11374 2746 29998 29999 26404 1934
382 91 8805 21812 9737 8822 7408 11665 1572 6911 21814 22026 6880 21818 29277 21820 30000 21821 986 8725 5600 8103 4560 1073 418 5596 14 5399 8729 1766 1481 5396 28588 30001 30002 27188 26736 572 1699 103 968 8296 11792 30003 7390 425 8294 22310 424 28514 30004 13213 30005 12434 635 12876 23219 5343 6800 23200 12489 31 6506 1797 4613 5987 6519 7272 13824 6043 197 8790 10867 12202 11979 30006 23812 2268 4916 21972 68 30007 4598 2283 10791 12184 8493 27872 1648 171 30008 8829 4558 5365 8795 30009 5654 5531 26900 30010 4938 8516 8863 9817 14305 995 12919 319 8163 30011 9758 30012 8295 2416 7471 25139 25138 4610 6932 11032 7224 2915 30013 30014 2754 29510 7868 12988 30015 12089 30016 9370 8819 1131 9324 21917 30017 8550 23819 23401 15253 15757 22173 12949 15702 7325 7374 26171 6872 3229 8830 12088 30018 30019 9952 8960 600 10847 30020 30021 30022 30023 30024 8547 17773 21964 17747 9344 17979 11743 27607 23057 12977 2501 6474 14529 30025 1355 30026 23497 1252 8584 18826 17901 30027 4443 30028 17765 30029 8997 22246 10231 12987 15461 30030 30031 23540 7715 30032 23548 1720 10334
383 5267 5362 3629 8388 728 30033 23180 12765 30034 724 22071 6588 7263 11336 735 7253 5287 23026 4559 9356 12215 7298 6803 5487 1995 725 8101 1012 30035 7266 30036 91 30037 23143 1916 11344 30038 24160 395 8438 7261 26080 30039 24144 4582 10180 5275 5352 5969 2048 8440 4562 30040 11346 2086 30041 5991 551 7272 8890 30042 1803 23848 7290 9349 5290 22091 13411 30043 7268 26528 28084 9351 9189 13746 23669 4938 12149 30044 5288 7282 23220 13802 10451 11680 8302 5515 22329 1602 7283 30045 7280 2314 30046 30047 2257 30048 23849 5313 24390 30049 2311 5520 11363 25172 5282 2133 5529 30050 2240 24041 13825 12137 2290 5540 12676 2388 30051 30052 5294 28467 7170 5506 28676 2324 7362 30053 5546 30054 29037 2350 5303 30055 30056 9426 22136 593 12217 30057 3590 30058 30059 7310 2415 30060 2236 30061 2192 30062 7174 5535 2723 25176 7318 30063 7164 4616 12151 27049 30064 29040 11375 11387 30065 11383 7175 7171 30066 29042 30067 8794 23952 5314 8919 2817 2778 30068 26995 5543 30069 2553 7274 2496 2540 30070 2548 2512 23316 30071 2547 30072 9394 30073 9170 2483 2555 23861 7339 6081 10852 7324 30074 29048 30075 11675 30076 7328 7330 28961 28665 30077 30078 24421 4832 2689 2613 30079 7340 30080 30081 30082 12505 30083 6376 5565 2757 30084 2624 22966 4998 1036 6374 7181 6934 11453 23842 1033 30085 30086 23854 4815 4643 23863 2834 30087 11416 29053 9179 7259 11422 9414 9408 23335 30088 2360 29057 30089 23000 23325 1932 30090 3027 3042 24080 3000 1030 11748 23358 26589 435 17142 8825 30091 5330 2007 7349 23370 12571 30092 6389 26597 2862 2936 2902 11401 8444 30093 30094 12542 30095 3008 10251 2976 26911 2733 11334 12094 7041 2376 1128 30096 5147 23382 7179 23371 30097 1044 3098 30098 9208 15307 30099 7375 30100 7184 1043 11430 30101 2816 30102 30103 30104 3909 30105 3130 11480 30106 30107 30108 30109 11512 30110 2277 30111 29072 30112 3315 24057 25474 7371 23420 3239 1478 30113 30114 30115 24112 23870 29220 12565 23451 30116 28476 30117 23478 3625 24496 25370 30118 30119 21897 1973 2058 30120 8455 30121 18038 3933 30122
384 137 5442 195 12317 29817 7193 13525 30123 30124 13707 13827 203 30125 14297 8132 14396 3097 14443 9750 25527 6783 7879 30126 8795 14829 3103 8815 9815 14883 15133 21903 8157 30127 15339 15272 28964 349 15462 2825 15557 15668 15684 5077 347 15689 15593 30128 10229 15640 21910 15913 5095 25089 10243 16073 5103 3105 16315 16383 17530 8172 16558 16504 16405 21998 16615 16703 16511 25094 3243 16726 16448 16771 16989 16665 17134 5155 17305 17151 17355 17365 3572
385 1787 8836 5203 23182 6030 1754 1792 5454 29837 23770 7731 1573 5950 5951 551 6375 1372 5371 1010 28677 30129 4956 23858 1712 30130 12790 30131 27580 30132 5811 3682 22394 16885 27253 10942 30133 5831 30134 22229 30135 10285 18110 9261 30136 8407 3965 30137 30138 30139 12167 1673 664 673 24142 5669 26708 10703 21604 23116 23111 5198 25425 5438 656 8732 25448 23143 11948 23140 25410 5416 27449 30140 1371 650 8798 1365 13092 11928 11927 23127 6510 23126 8388
386 12387 8072 7212 10494 30141 7240 30142 27086 7408 5425 10495 30143 30144 30145 70 26800 24703 1034 30146 22327 220 23074 5000 29537 1016 13431 4658 2569 30147 14796 6884 8908 30148 10743 26570 3340 3325 10487 30149 30150 9227 12668 1183 30151 10498 9287 11048 30152 9234 17277 30153 27572 9239 23586 9259 29348 30154 28234 4716 16885 27594 17896 30155 849 861 22206 29112 27602 30156 917 26247 30157 26671 13014 11093 30158 1260 30159 6166 10358 30160 30161 30162 27015 30163 30164 26201 30165 30166 30167 1308 6821 30168 30169 30170 30171 30172 30173 30174
387 436 12306 1 22028 26647 22991 5839 162 21869 433 12441 4591 240 10469 8917 30175 12902 14627 444 27169 30176 30177 10519 30178 30179 8140 30180 176 11723 854 1149 30181 16581 496 19846 504
388 6577 3297 27695 5604 6579 8278 5616 30182 965 8049 8739 12420 5605 29560 5615 2855 29872 8776 30183 8775 6578 5374 7024 6610 6604 150 6877 30184 153 30185 8599 30186 30187 1572 5415 154 30188 166 7803 6606 30189 172 1603 25029 24873 5435 28575 5404 186 644 30190 1871 5411 5370 5369 27908 28328 566 191 615 30191 30192 30193 30194 11203 8617 30195 30196 23051 30197 5442 26531 11731 24942 8749 30198 5581 24819 24956 19575 4193 17561 20097 20072 23618 8189 11927 30199 26068 17889 20576 13356 20306 12838 30200 23631 30201 30202 23625 30203 30204 23940 30205 30206 9492 18135 30207 23643 30208 30209 30210 30211 30212 30213 30214 30215 30216 30217 30218 30219 30220 30221 30222 30223 6976 30224 30225 30226 30227 30228 30229 30230 30231 4130 30232 19247 30233 19546 30234 30235 30236 30237 30238 30239 30240 30241 30242 30243 30244 30245 30246 30247 30248 30249 28578 30250 26207 30251 30252 30253 20342 30254 30255 30256 30257 30258 30259 24376 26066 8803 30260 8781 21893 6514 21814 23333 5576 6866 8735 6880 21894 24764 24804 21818 26069 23336 5574 616 30000 8627 8498
389 1535 30261 6947 8669 4811 381 6985 23468 23427 26534 23424 30262 8811 22083 5386 23481 8028 5395 27674 1611 30263 26536 8729 566 30264 6513 12346 30265 4791 30266 6857 958 30267 23986 10426 8610 6810 572 5417 12 29421 6780 27911 5950 24805 25347 6292 10178 9652 30268 21632 30269 1971 13345 25350 30270 6656 30271 13505 9631 9677 21840 1759 21819 28972 4974 13818 13868 4907 30272 30273 8437 23741 5247 1673 7782 5198 13372 27193 6699 29886 1719 24235 23354 24287 27117 30274 23179 1687 8790 23187 109 23461 6033 150 153 5628 154 166 172 26586 5820 615 29245 25199 13989 27090 25348 2283 268 4949 24896 5712 1443 23189 12914 14402 9695 630 2260 9391 14313 9651 30275 995 1579 254 316 75 22122 6874 2235 8795 2580 310 29859 14935 3103 2773 15061 7413 15053 9432 4973 9817 8493 6293 15106 15031 27670 14310 7647 14023 30276 15325 1816 8164 8522 5058 8804 712 5604 15640 30277 12934 6291 11665 6508 9455 9865 23686 8147 14804 15894 8107 5084 355 15977 30278 30279 15281 15035 23302 16000 7662 12153 5576 30280 14177 16045 15358 15309 30281 15589 8819 13932 519 12927 21917 30282 14535 5114 30283 21888 2853 16383 15702 5411 9893 7024 3467 13090 15869 30284 2879 13217 5129 3186 6828 5123 16682 16304 21511 9907 7064 15668 26100 16221 16715 16385 9446 15616 24841 15991 30285 15492 14809 16791 6580 8004 9860 5138 6581 23210 1541 23413 8018 30286 1546 1563 1559 30287 24825 4647 9952 480 30288 1252 9924 16846 24459 16745 6794 8563 3740 3630 26112 9422 22215 17670 8185 3813 3785 12797 30289 30290 12794 17644 17747 3736 16694 17827 5171 12977 4059 17073 30291 17823 686 9668 9663 17721 30292 12692 6708 17599 12959 22101 12808 18840 15185 26937 18604 15750 18691 30293 22246 8986 12338 3236 22418 22069 24566 5233 5232 5225 18403 30294 12355 24942 12356 12804 30295 8122 1348 8750 19515 5258 9448 8824 30296 24820 24832 19380 8011 9473 13150 10289 18964 19540 19701 25356 25357 30297 19855 19809 19364 22437 30298 6772 3494 16510 30299 19985 18352 20005 3349 20073 30300 30238 19449 12813 8088 19197 19200 23220 25117 15701 30301 20323 17025 22270 12358 18053 20343 1582 20415 22457 16914 30302 5392 29377 4948 20465 16593 18112 20480 20492 30303 30304 5047 12362 19173 9481 12368 29919 30305 22474 13030 19684 9454 30306 25102 5440 30307 18405 30308 27011 30309 27655 26965 30310 30311 30312 22534 27212 21545 16749 30313 20211 3762 1112 20681 23597 20744
390 30314 30315 30316 23659 2177 5934 6105 30317 24731 30318 12090 10455 2072 26480 9575 30319 12423 424 5736 6326 11671 30320 23666 10450 14082 10474 2805 5266 6385 8804 24361 5706 8296 5250 8324 359 6331 788 7375 24032 30321 2198 1838 1855 6395 9207 30322 5728 9851 5734 3222 1832 9223 27759 30323 6332 6333 5759 2979 26476 6172 11748 7047 3313 8898 8859 12454 3450 9905 1864 30324 30325 5793 825 30326 11758 5801 3725 1202 30327 7059 3665 10511 11804 30328 3039 9252 24541 30329 3956 1852 30330 3801 9266 30331 4132 4478 4385 30332 30333 30334 18597 5797 4536 27006 5856 30335 25370 10297 30336 30337 30338 30339 9271 30340 30341 30342 13859 14871 30343 3283 17463 30344 5883 24578 30345 25500 12753 30346 13598 30347 9816 9286 20829 6177 30348 5918 22511 27400 9295 30349 10096 24659 24668 30350 1670 22277 30351 4226
391 7471 13075 714 30002 8472 56 17 8103 8 4940 30352 1031 8340 30353 4489 6884 1252 12708 5183 22248 17644 22086 12407 30354 30355 382 7199 30356 1443 26297 105 151 7484 7472
392 30357 33 22056 7980 1363 30358 1372 28501 4886 6860 27650 1905 5569 28117 26575 24122 10 90 4893 10943 11205 242 628 7865 1090 24171 8486 8103 25343 4940 29648 30359 30360 12299 10946 24994 10163 30361 23658 2041 7391 23668 22098 12592 238 1143 9974 18431 126 30362 30363 12594 337 4958 4600 122 25195 30364 23076 1207 30365 30366 12443 30367 27169 30368 2451 2416 10199 14422 30369 14004 30370 30371 27599 1119 10004 10238 10207 15103 6830 30372 1130 2790 15768 343 30373 28509 10271 30374 30375 30376
393 640 10790 23059 30377 643 30378 5984 5151 6073 1667 11631 1252 30379 2331 30380 6830 1441 5987 29602 1796 1018 30145 23069 1361 1748 30381
394 10974 25540 7821 10973 29701 6410 7796 10986 7798 7802 6729 11225 10996 25555 25561 10994 25576 13580 7808 14514 9993 25654 25738 30382 25910 25792 25902 17357 30383 25980 25953 25964 30384 30385 30386 30387 11267 12488 157 12128 8095 7814 10977 7800 11269 11268 270 149 8099 7819 7818 7638 26596 30388
395 6271 10877 9562 21815 5457 29236 9508 5351 13188 9510 9576 7611 27951 26791 9591 25141 13456 13299 387 9610 993 25067 13791 30389 30390 13971 9709 9681 13984 13987 13914 12183 2877 9036 14019 30391 193 14071 30392 9520 7524 25526 14213 9722 8263 9726 9704 14093 30393 14180 461 469 14234 358 245 9736 14363 9732 9772 14413 2344 9760 14460 12911 27992 2345 8680 14493 9785 2374 9768 25527 14033 9794 30394 9801 7663 11038 9818 15004 7559 9810 15051 30395 30396 471 9828 15222 2774 15397 9786 9838 15130 15425 9847 15355 9832 30397 15550 15321 15532
396 6408 30398 11290 6427 30399 6426 11291 11292 12117 29263 11293 25982 11274 7823 6424 30400 30401 6428 6412 30402 6425 7822 6433 6439 30403 6430 6441
397 643 7984 159 721 24518 10874 1293 1435 1868 77 7186 71 34 10932 8619 7539 7875 52 9105 11339 165 13360 13379 27688 30404 13403 10150 7202 27 420 1924 19 7538 24 12177 22033 6283 13407 27445 115 138 29778 269 30405 28 232 13474 27155 117 162 225 6517 7838 7786 436 13584 434 684 75 1931 383 13689 1915 428 29547 26473 28275 136 30406 176 4940 175 7807 164 7147 13751 171 12048 422 1877 14 135 1023 30407 1031 432 30408 7428 14133 647 5608 23753 294 220 337 7545 8493 23756 10804 2441 6057 12266 1101 5991 2374 27552 14172 8507 12930 14491 8136 7550 23255 14442 8517 30409 433 30410 12440 8440 272 10199 30411 10791 246 30412 15013 14460 2407 30413 12351 287 30414 15082 2321 30415 2308 30416 14626 12453 10794 6061 325 5533 30417 14495 30418 14562 30419 14609 30420 14599 30421 30422 14790 1018 8520 14775 7502 23760 2490 7663 8530 30423 1830 30424 27598 314 15752 8155 30425 30426 12510 280 12935 2769 15151 326 5304 4650 224 2629 1916 15739 15550 3336 10228 15533 338 28133 30427 30428 3229 8538 30429 28606 27042 30430 30431 2938 13 15751 2886 12571 370 30432 21924 21511
398 5445 5481 23051 7331 5452 24381 954 5352 716 4895 7190 724 5354 1557 8297 1009 5615 379 5581 1918 7996 5486 7167 6676 5502 725 5584 8289 2219 986 5363 2412 6703 1914 5498 30433 5370 22974 2000 8286 10929 10863 1541 24805 7397 9425 7517 1601 4944 5820 8115 8490 2080 6601 1178 2044 24745 4958 9639 4938 3067 7268 6655 395 9635 13749 6671 2314 432 13868 4610 11361 6710 11375 7170 6349 2388 23257 5296 11984 29024 12451
399 1383 10948 70 5696 29284 29416 4886 29394 974 52 23746 11208 118 24117 13077 12473 22041 1428 660 4940 8027 723 8052 7502 26187 24821 42 10814 1320 8105 25041 23670 25191 687 23748 11997 6518 775 14 90 277 5987 12592 238 7196 136 61 237 120 8008 28954 970 30145 30434 30435 30436 24903 8065 1920 30177 7401 27493 30437 22 30438 25321 54 7389 13267 10818 1063 24115 6506 694 138 30439 8486 27483 6658 29514 10854 122 21837 4968 11744 2407 125 30440 171 8323 6932 30441 108 4591 20448 188 27167 213 8080 12890 8493 30442 2416 23675 7432 14031 12184 30443 27495 2049 1031 1232 30444 30445 7300 30446 30447 8124 7307 2268 12509 2365 23081 12899 231 29631 27660 10840 1018 10791
400 6877 566 6764 5417 6922 1886 23270 13179 22263 5406 7693 5360 23266 23184 6921 23260 5414 24845 23261 6793 1577 25006 7501 30448 23263 6770 23265 105 7784 7416 30449 30450 27699 23333 6591 12385 12433 5823 23336 25353 16 8498 21488 30451 156 167 23136 23116 13345 28292 23338 774 23340 27893 30452 572 23267 29637 5582 12431 30453 23342 30454 9603 30455 147 30456 30457 23343 30458 30459 8701 6620 8596 8532 5388 22073 30460 12439 30461 8820 23200 27491 28365 30462 8783 23312 150 1589 5604 30463 30464 30465 14735 6641 7431 8502 23306 14736 153 25634 1597 8640 5605 30466 26066 8657 8660 8803 154 5683 8629 1599 13691 30467 13686 8627 7424 30468 5387 9670 166 30469 23324 13752 7024 30470 8630 8735 8631 12424 172 30471 21778 5606 21785 1930 23328 6772 186 25679 23330 23695 1507 5607 23331 191 30472 23332 5411 1560 5405 8599 251 8597 13362 6567 8590 7790 9626 13707 8618 13700 286 24722 13821 6634 106 6719 1322 6714 7045 29425 8055 27499 30473 8790 30474 30475 30476 22974 335 30477 5584 30478 2235 21843 6568 27916 7803 29000 26805 30479 13589 6687 604 30480 8715 30481 14168 14223 21887 14169 1891 8043 30482 8708 30483 5645 3164 1104 29855 680 7332 30379 12169 13092 7731 2749 30484 30485 1074 28853 1688 7733 11202 1761 1648 1629 5438 1035 5201 30486 6073 669 1643 30487 11783 27084 2426 681 1775 1727 23737 1673 12165 26646 1737 23788 5661 30488 1180 6030 7331 30489 1658 1744 5151 5247 25041 26524 4905 1899 30490 379 30491 23984 30492 23077 29555 4187 11629 26823 5670 11631 14235 29424 27095 23630 1736 23981 1708 1667 30493 1364 1672 1103 30494 8511 14106 14269 21829 30495 12381 23309 1735 29422 30496 9533 14365 14368 30497 6778 23181 26727 29812 29429 1581 567 6870 14482 6761 12914 9758 6769 14517 8044 15063 30498 25422 30499 14554 568 6915 30500 30501 569 23800 8035 30390 14730 12516 14703 8496 29853 8795 14802 23275 8505 3353 8522 30502 12351 14021 13876 30503 8573 113 23291 8525 14863 9736 8615 9822 13232 14938 9432 23986 29725 24808 990 13869 2602 8815 21801 30504 21832 29856 30505 30506 30507 6786 24846 25196 10458 15201 30508 7702 9817 24850 8587 30509 28870 15253 2788 1452 30510 15377 24852 6996 9849 5687 27651 30511 15491 13833 14782 9854 14611 8611 24375 15536 15524 8535 30512 6995 15239 9566 24853 30513 29815 24785 15660 23175 30514 30515 25147 24216 8616 23178 27278 30516 6556 12934 13485 30517 12929 24854 25027 21840 6608 2067 22067 13792 13210 10433 9865 13658 1990 8551 13972 8668 10437 9592 9721 2260 26720 27897 16000 3132 1694 9680 9430 8548 13843 15247 9765 30518 16138 14486 4942 15380 23302 8493 12995 5591 2326 9766 16711 8612 8819 12927 9440 27701 21917 3118 30519 7029 8553 15795 14250 13477 30520 3327 3270 25071 15816 16361 29816 27911 9667 30521 10419 16516 21506 30522 27924 14139 30523 21509 28178 16594 14351 16682 16715 7695 30524 9907 16687 30525 3209 14886 30526 27750 15573 30527 10559 12311 9728 16090 23413 30528 8563 5752 10483 16406 17057 30529 17088 10424 7453 30530 30531 21841 30532 6923 2782 27519 30533 10470 9952 17226 23449 8279 30534 30535 26927 30282 17504 10545 29116 13463 1141 17639 8191 30536 17753 3681 4598 22215 12858 10475 1252 18740 16665 24802 1031 16862 23484 3879 6830 18050 18074 18124 30537 29972 18085 12794 12977 240 10491 22224 8111 30538 21525 8705 25102 18404 5784 18023 12951 3911 18534 18615 18685 18698 23509 18840 30539 18897 18959 30540 22246 30541 19204 19236 30542 19305 90 24806 19463 13314 6289 19422 30543 12551 30544 12895 7678 14342 30545 9412 175 12808 21234 19878 19274 30546 30547 30548 20003 26958 20050 20280 19540 12753 20423 606 19025 20560 20561 24725 22270 12362 20680 9481 30549 20830 20812 20864 7985 11830 13030 30550 6179 20898 20987 20944 21004 21139 21096 15729 30551 30552 21041 26965 8210 21320 12799 30553 15806 12947 23531 21353 26224 30554 30555 30556 30557 19788 30558 30559 21559 30560 1835 11208 30561 24855 1796 6223 5370 23620
401 25540 30562 10987 11270 10989 5581 7800 11229 121 5584 11223 13578 25585 30563 25594 14177 9130 27132 6734 25556 25639 432 164 25655 1582 25667 25618 14807 25740 25743 2648 23323 30564 1304 30565 30067 22611 11285 8273 11263 7815 11222 21761 149 30566 7803
402 5964 12853 10433 8697 28062 5931 30567 28048 30568 28943 21874 8605 7029 30569 24792 12431 24230 5460 6006 10416 30570 10437 21806 25150 8822 29657 150 12462 30571 9565 5384 30572 4883 5407 30573 29658 21854 438 8658 153 8600 447 9892 7644 4391 13261 13477 25196 6398 21826 9090 26558 13529 5373 30574 8493 28874 24316 10461 5364 5750 13712 27132 2300 30575 13755 24420 13553 24164 13424 23887 30576 29660 686 7655 9667 27520 13894 13722 12423 6657 5422 8111 13766 23250 28361 14072 30577 24474 12343 20102 14139 21855 20175 14205 14351 7031 30578 2144 30579 8023 28178 29288 114 14585 23805 14613 14343 9660 13544 1437 13804 14540 6981 14355 21795 3353 21909 327 2279 14739 14886 14984 13883 14965 5423 27516 14263 15058 14620 317 12393 25081 30580 15155 15303 14814 15418 8814 23881 14578 10544 15630 14779 5082 21858 30581 15573 2545 15614 373 15653 30504 14403 30582 5087 374 30583 387 8817 2374 15845 13 21545 14705 21912 15946 2791 15694 15702 16090 2782 527 3018 220 30584 16205 2837 24238 16306 30585 5177 14178 2808 16406 30586 30587 7667 23401 16470 30588 10491 16668 30589 16389 16764 30590 11966 16749 24233 30591 4690 16778 16790 30592 2419 5050 17173 7127 30593 17175 24783 30594 8806 17132 22174 17037 7803 15917 17348 16799 2474 30595 10545 5584 24305 24307 24308 24310 21690 17444 17447 30596 23541 30508 6687 30597 30598 17666 14327 30599 3588 3765 21867 17764 15129 3103 9963 3762 23648 24447 21908 3178 7678 30600 18085 3164 17530 3862 18208 17451 17851 5003 30601 3439 10535 15757 4102 18012 854 4208 18534 28614 30602 18745 19022 30603 19034 19033 30604 19328 19269 30605 19680 19717 30546 3573 30606 30607 7054 17769 30608 30609 19902 10568 20073 30610 10509 25118 19444 18982 30611 30612 6794 8237 20544 20467 13974 20766 2521 30613 20681 8189 30614 20804 11076 30615 30616 10549 30617 30618 21119 19294 30619 30620 21320 21188 21394 21336 30621 1403 30622 30623 13703 30624 30625 30626 20472 21318 30627 1507 30628 26203 24466 30629 738 30630 30631 30632 7120 30633 30634 30635 743 30636 30637 30638 30639 30640 30641 30642 19364 30643 30644 13000 30645 30646 30647 30648 3859 10622 30649 23618 30650 30651 6982 30652 30653 30654 30655 2250
403 1707 30656 1643 28448 30657 1180 1373 23522 9117 29864 28218 23993 30658 4938 23077 25128 30659 1673 9340 30660 30661 4621 23700 7744 30055 1136 2340 4910 29890 1464 23796 8462 30662 6461 30663 1126 7350 5262 1460 30664 30665 30666 30667 30668 30669 28830 29850 1457 1438 1665 26696 1385 27771 30670 30671 30672 1459 21627 30673 22962 5462 5693 8427 26733 1104 30674 377 527 8937 6315 30675 30676 7504 1389 6547 30677 27131 29521 12589 25133 28130 437 29580 11776 4775 26743 8463 30678 24151 6328 23123 3819 11948 30679 24788 4956 30339 8330 10749 26764 1370 5702
404 22055 354 9510 24205 7410 6914 8495 12305 85 8 5590 27912 5341 11208 27493 6589 33 21845 5823 12313 12299 8805 106 153 5434 13269 30680 90 21858 1609 6590 10950 21859 1269 154 11205 2223 237 308 820 27598 14038 16767 27531 30681 12594 12314 8600 8067 77 13067 30682 8554 1141 8161 4600 30683 2365 15070 30684 9448 6763 17604 8076 16656 30685 6884 2024 30422 16546 6888 8958 272 5043 30686 30687 2268 3028 30688 25526 6878 27546 30689 8819 3207 365 25139 14770 325 1352 22183 16558 29739 21850 2825 21910 30690 11995 16371 16372 30691 30692 6451 14306 16265 30693 9914 14660 30694 3127 12883 12595 15812 15603 15607 2167 65 6057 30695 5094 312 20331 16449 5370 10559 6875 7717 21998 10223 23373 8165 3096 12926 27704 16322 8414 3323 12929 9438 5784 5225 337 17355 10482 826 5791 1006 280 16323 30696 835 17341 14589 21997 27580 30697 9668 6580 17426 30698 30699 7067 12783 30700 12454 8868 17691 2177 8209 27587 2441 12779 17696 352 6830 9035 890 3637 12804 17758 12606 7077 893 22189 17692 5625 18327 17952 6126 7709 18058 30701 12475 27599 12977 17069 10246 19146 12371 30702 18381 12974 8215 4251 4208 18585 7068 13001 30703 1294 1252 30704 12989 8221 4043 18589 240 12958 20230 29867 4241 30705 12337 30706 894 16770 1279 17948 1866 13004 22013 8268 13014 20071 8409 30707 19768 8421 4653 7418 10321 10327 19816 30031 10576 7468 23531 30708 12729 30709 30303 11107 35 20809 30710 30711 20324 545 20566 30712 11532 22008 10555 30713 20787 22195 30714 10605 13037 19020 7413 2981 10368 30715 10612 30716 18345 29922 22020 5922 30717 30718 30719
405 1269 30720 1686 5439 23051 5438 1789 1459 7487 54 30721 28537 30722 691 2474 1706 2521 1479 30723 30724 5767 24994 25378 26728 5988 1666 9306 1448 1354 12164 6506 1062 12171 10180 1759 30725 28563 30726 1948 606 8029 30272 7513 2048 120 12336 24997 10692 30727 732 2028 7263 7780 7262 23656 103 1626 23192 734 1417 8570 30728 12869 27170 56 22098 38 2102 30729 8472 30730 30599 7271 12281 90 24027 4938 315 337 22318 685 30731 29452 578 196 4956 220 25566 25626 23068 187 25059 12874 24914 30732 23809 8839 12017 8474 1031 1148 5691 2685 27106 30733 1141 30734 24071 1017 1008 24076 23086 4940 106 30735 30736 14424 167 30737 8859 1108 29405 22052 5466 7170 1095 23219 5987 1075 7195 4979 8104 694 8490 6057 10797 1096 6830 24181 4598 360 6085 29393 1352 29453 2626 30414 6344 7760 15144 6347 30738 5087 4647 2223 2389 2485 22161 7518 29279 7417 6881 5645 15316 22135 28522 6399 8056 1172 1652 10734 26809 693 28653 28535 30739 8960 1633 2356 27568 29407 16265 30687 27587 17476 1048 1465 30740 30741 1165 9339 30742 2733 8972 6897 17746 30743 8209 30744 613 19068 18212 27605 1695 30745 30746 5495 6475 11297 25485 30747 26172 30748 1311 602 10047 22229 1850 12254 3911 23418 30749 28686 30379 4732 1733 526 15942 4729 1229 30750 2020 30751 29115 30752 30753 9369 30334 8547 30754 30755 25505 30756 8989 30757 30758 28690 24915 18981 30759 1294 6884 13020 19266 30760 12992 7234 29911 30761 30762 27010 29477 10791 26613 27274 1619 24576 19825 30763 12901 30764 24596 8268 12262 1263 12815 30765 20071 5784 23544 30766 30767 26598 7068 35 8992 12714 30768 30303 29550 27058 27586 20248 1072 30769 15836 28629 12645 26593 27807 13015 4734 30770 6175 29652 30771 30772 30773 30774 30775 1784 13023 23096 30776 30777 6176 23572 21042 29493 30778 29489 30779 30780 22478 640 20975 632 30781 22012 1449 30782 25369 2619 11929 30783 30784 30785 10072 1082 13031 12698 30786 6187 30787 6210 30788 12842 30789 30790 30791 27634 30719 30792 30793 30794 30795 30796 21915 1451 10097 6207 12835 10372 12840 30539 28219 26715 30797 7633 30798 13026 22548 30799 30800 30801 6489 30802 30803 1319 10383 22020 28639 27056 6237 28638 30804 30805 6270 30806 30807 12260 11147 27104 24668 30808 4764 22272 2505 30809 11635
406 30810 24456 1880 5453 5247 30811 12228 30812 7497 30813 30814 30815 26758 30816 12074 30817 30818 3385 5110 1824 1224 975 1372 5438 29278 30819 30820 5436 30821 836 12770 27302 30407 30822 30823 19427 325 2605 14 30824 4036 14964 5882 5252 8898 30825 30826 8421 5183 24528 26458 26383 30827 30828 24707 30829 24383 30830
407 25062 25343 7870 27090 30831 5493 6497 13179 11203 5350 5358 8002 30832 13166 9024 7996 7191 5406 6572 5422 23873 5440 10937 6619 30833 121 4907 7515 167 29217 4936 4884 775 6729 9569 344 6582 12313 13258 8756 6568 8107 8615 9035 2001 8106 6640 23210 6567 367 660 2000 26063 24948 90 6591 6870 6629 1592 6644 13362 4923 30834 64 8065 4892 572 6602 1601 1573 12592 8029 24449 13205 175 13335 575 25058 21497 13434 25066 6293 4944 1602 8067 13464 4935 8762 353 9622 12342 8066 4945 6634 13556 27483 13576 8493 8507 13583 13598 971 26270 6641 12872 9617 8118 4938 9130 6932 7431 195 6655 9628 23224 30835 171 669 8121 13970 5370 30836 3067 136 13707 21840 13700 4966 13472 8502 13714 432 13622 8020 13276 13782 13786 168 4591 4940 6720 6727 6701 4976 13687 4973 9677 9663 13831 12184 4974 6683 30365 9672 13818 13845 6057 209 6708 6719 6043 4977 2188 10809 13962 2224 4982 13895 28590 9687 12057 29633 14000 6714 2255 6712 6713 30837 13952 8790 10190 192 2243 14026 14062 9730 23876 9769 9633 6724 14075 14069 122 6723 5519 12508 12318 7445 24181 13989 30838 14177 14164 14250 6735 14211 361 4610 14244 14066 14272 1017 14240 6743 1582 8510 14283 14265 164 1116 12963 265 5008 14311 203 7167 14349 24839 9533 254 1431 14369 435 253 14410 8517 28323 5014 14418 14451 14438 29543 14452 6899 8134 2403 12914 268 23684 6769 25077 10520 14509 5037 8132 14518 5020 14511 12904 2366 14357 2374 14552 23683 12247 25076 10469 28604 8137 23685 6765 6783 6762 7320 23277 14624 23278 6766 14652 10804 6763 14661 8168 14647 9757 8127 14599 14553 5022 5559 6933 1018 6061 8522 30839 15336 8795 30840 14750 10791 6774 1916 23076 14762 14773 14804 8148 9753 14809 10209 14827 8144 5102 14883 5070 7439 29727 22140 3374 1146 10819 10214 10216 30841 14932 8530 30842 14957 8167 5047 1250 8152 310 9432 14975 5041 10571 15053 7170 27906 28998 30843 30844 14570 15072 8160 15059 30845 15123 6786 15129 30846 15126 5058 23302 15167 15134 1165 12922 25084 8490 6788 12929 2679 15277 326 6902 15280 30011 9185 8548 30847 2772 9848 5066 7863 2825 8165 30848 15461 15484 23326 15492 15541 8164 15546 26100 15555 8864 2826 30849 12960 15593 15524 24789 15558 8543 22156 15668 15634 3102 30850 8538 12934 9444 15749 3185 5116 9448 15783 15924 2878 15823 12920 15863 2952 15838 12993 15821 10233 3323 15919 30851 5088 2840 15977 9445 15911 15849 15944 10247 5109 16000 26468 9447 22149 16082 16058 9879 12089 2606 30852 24438 30853 16195 29437 16196 787 2260 30854 8819 8546 12202 30855 16265 2067 4962 16303 16268 9914 27657 30856 9420 5114 4670 30857 12704 16371 3236 16384 10493 16415 16416 16468 16397 3079 16385 28252 30858 16353 7053 5123 8545 17435 16558 1022 12947 1248 30859 21568 16781 16665 12559 16656 2850 16711 16715 16712 30023 16784 11480 3177 24055 6154 16788 21952 8177 5138 9223 4691 16737 23413 10555 16914 5745 17761 10667 1051 9217 30860 30861 16947 30862 16860 17035 6890 5146 3531 3492 3281 30863 17401 17134 8563 16803 10457 11441 12782 17151 3450 17190 29736 30532 30864 23353 3452 12671 8183 17334 30865 5794 5625 3522 17219 17268 3574 3127 17354 17359 6892 30866 30867 29412 26927 12705 17425 30868 1840 3773 18673 17547 12708 30869 8574 10598 17808 12974 18932 17561 17640 8191 3740 10726 10695 3674 3813 17753 17748 5784 29738 10511 12801 24941 24907 26535 17350 30870 30871 7372 30756 30872 30873 3586 23484 30874 30875 5171 30876 17915 8203 9249 7066 30877 10637 30878 18028 23769 17948 30879 30880 3852 3912 18076 18063 30881 18124 12804 30551 30882 18036 18035 8584 10671 4027 3981 17926 18080 6889 19897 30883 18058 1252 9969 12794 4125 4088 12977 12972 30884 1049 18275 30885 30886 26140 26618 4074 16713 15864 5841 6637 22224 18384 30887 18443 26133 19795 22231 12684 12691 26614 18513 27596 18543 13001 18562 4243 853 18635 18517 23514 10590 8582 11071 8421 18625 18585 12808 30888 11504 18734 12703 30889 8585 18823 30540 30890 18680 25111 18840 18641 1835 18602 19061 18807 12694 7900 30891 18613 12989 22248 30892 12731 19052 4490 30893 30894 28034 18985 19197 18929 10582 10540 525 29910 19020 5233 25112 3903 10573 23556 3723 19204 29908 28876 19230 30895 6294 8212 11080 19341 20321 12356 30896 30897 12355 30898 26945 30899 30900 19375 30901 30902 30903 11106 30904 8408 10311 19582 30905 19609 5876 19533 5258 13004 19684 10321 11569 9471 10568 19713 30906 30907 12823 24598 12723 19984 19828 30908 30909 19699 19835 19903 19941 1266 20092 19950 10040 10322 19902 19751 19643 30910 11103 19960 19979 20070 12826 30298 20324 20097 12741 10576 30911 8218 12827 30912 30913 12359 30914 30915 30916 30917 30918 30919 7933 11532 30920 20261 20223 30921 13015 22262 20236 20294 30922 30923 10587 20327 20419 30924 20405 10328 6496 20359 10603 25117 20407 26134 20465 20350 12728 10592 4763 20451 30925 20560 20561 29917 30926 10331 20580 30778 29919 20787 10330 30927 20628 12714 30928 30929 20957 26965 9302 7688 7904 9481 20719 30930 8237 30931 30932 22464 28877 30933 20870 29921 10605 21158 30934 30935 13030 29922 21345 12834 30936 6490 21430 8959 30937 21541 30216 13029 30938 21115 21139 29496 30939 21534 21547 10631 7125 6204 30940 30941 21403 21393 21275 21041 10365 22293 25507 10670 10074 30942 30943 21346 30944 22505 29924 30945 30946 28990 23576 30947 21435 13037 23575 22303 6213 23587 22304 30948 30949 30950 30951 30952 30953 30954 21549 22305 21562 8245 21565 30955 22306 7891 22526 30956 30957 30958 22020 30959 30960 29927 28994 30961 29926 30962 10680 30963 23590 7378 30964 10384 29928 21553 30965 30966 26876 28993 30967 30968 30969 29929 30970 23620 23604 30971 30972 30973 30974 23597 30975 30976 30977 30978 30979 30980 10678 11575 22547 30981 30982 30983 30984 22023 1457 30985 11821 29932 10639 30986 30987 30988 30989 29933 30990 23611 29949 10399 30991 30992 30993 23559 30230 30994 30995 28788 30996 30997
408 373 11208 27791 8005 10866 8716 7402 26759 65 6446 29975 13 12387 5101 11743 10949 7212 4938 11960 6137 27445 12274 30145 26829 171 12870 28283 10874 374 10791 23235 326 240 6920 671 143 388 120 114 26880 12204 29884 8274 25183 22398 674
409 5269 28370 30998 9561 26534 23656 30999 1459 31000 1056 31001 31002 554 4784 1917 1012 1040 31003 28127 1564 5928 5702 26176 26817 9332 22090 23840 31004 7275 1601 1173 1463 22089 2071 5736 28897 1074 31005 31006 8375 31007 11309 4938 12491 31008 26988 1054 8396 609 1989 5393 23831 27177 22211 23839 5311 2178 8502 696 22328 25462 8352 11306 5440 13503 31009 31010 5286 9714 22113 5525 6012 1050 31011 7331 9780 8263 22105 9699 31012 14211 12758 24139 8912 5531 4793 22081 13395 4997 31013 29403 5008 23858 31014 29527 23851 24449 444 31015 6366 4622 28143 8447 31016 5945 6359 8354 6070 31017 23079 31018 31019 6085 22127 9395 2716 1113 5299 26896 24721 31020 29848 31021 5559 9362 5786 28968 9394 22145 31022 31023 28624 1806 1657 7330 15188 27864 28962 31024 2691 15191 5318 1855 1838 2801 7786 4836 15324 2789 24931 14784 28603 31025 22972 9867 22115 15368 8394 2965 31026 5108 646 23844 9384 2903 15887 2805 26941 16032 15823 31027 3287 15102 31028 1154 2689 15899 31029 31030 31031 7778 26903 5495 31032 3102 31033 23388 31034 4855 16467 16621 29888 6555 31035 9208 31036 11402 31037 22171 16728 31038 16080 26807 8383 3027 16934 12947 11670 1174 15736 31039 1843 29852 2130 31040 27243 28998 22201 31041 17553 3625 17581 31042 6902 17410 1256 1252 31043 5546 16752 12794 27190 3882 10590 8318 22107 3730 4055 1204 1981 10166 6112 4716 28901 18098 31044 3764 26922 28866 1245 14812 4215 31045 31046 7374 8983 30837 31047 18814 4518 13466 4847 4858 19018 31048 24999 31049 31050 19290 31051 6158 31052 22236 19429 11913 18121 9411 28909 19706 10576 9669 31053 14904 6198 20429 20699 20328 31054 31055 22269 26947 22143 11728 31056 31057 23711 31058 31059 8990 31060
410 8842 31061 11743 31062 24352 24915 4119 1620 31063 1360 8925 1664 26729 1212 31064 707
411 9054 5351 31065 13693 31066 31067 31068 10877 410 23908 25248 25250 25249 69 27977 10142 31069 7580 31070 31071 5579 27487 9027 9056 7572 10953 26160 31072 13199 31073 29236 5448 10883 6954 13401 27645 31074 7701 9146 6955 9042 29243 6960 7529 10878 31075 31076 12174 31077 26596 26019 31078 29675 9106 12317 7028 5590 12204 429 9510 6632 9028 31079 9890 31080 13269 24992 412 7611 14735 7873 7870 12313 16 687 13167 12399 31081 12331 12395 12295 6927 8820 22027 6582 13289 9066 29684 2131 26018 5823 13354 13347 26162 31082 5434 13217 52 13172 31083 31084 25525 31085 12307 31086 31087 25407 7638 8645 31088 13429 13213 8655 9600 8656 670 49 5627 9077 27984 11942 11941 11943 142 7613 31089 13546 27778 7569 29745 6999 9132 31090 31091 29234 31092 13277 9097 13455 8649 31093 31094 8679 4320 13668 29235 13597 13757 27472 13517 7618 31095 93 150 153 29248 9162 31096 29231 9690 13899 29747 31097 9112 7553 29700 31098 13909
412 8322 27201 27861 1069 4337 1916 723 5441 10455 31099 26984 1006 7761 24433 11659 121 1601 1063 5101 22030 31100 5465 7261 28658 26698 6800 5159 8537 5506 4944 6310 8302 29565 6624 7398 4976 6040 23239 9981 2309 1975 31101 27184 12451 9982 749 29030 7320 4639 31102 445 1017 1582 2430 1028 30064 6767 25332 9992 30367 5534 14989 5546 31103 6100 31104 6934 2772 5481 31105 31106 1250 15824 16265 31107 29998 10004 8560 31108 10021 17188 31109 31110 1107 4684 3554 31111 31112
413 10951 64 8076 1688 10979 344 367 775 679 986 7865 119 163 4940 995 12351 6830 9984 7039 203 7390 349 1031 15339 30015 31113 31114 8951
414 6983 26071 27820 5357 31115 6905 5471 29609 31116 29008 11305 23131 4884 23144 7015 1435 4907 31117 31118 31119 8375 13165 1905 1557 6627 7261 2044 4935 8102 31120 13385 8889 13435 10438 1602 12019 28412 26058 31121 13542 31122 7434 681 13344 8343 11680 2155 4938 31123 4966 6671 31124 9631 432 25069 439 8121 6601 4973 21611 13482 13556 13860 13940 31125 13372 382 26507 2314 23241 11361 31126 5520 27090 6717 6721 13266 957 14065 1017 6734 749 31127 1582 9426 5008 4976 31128 14498 5616 8801 25077 13619 25075 12451 6978 25076 9687 5615 12508 2580 11785 25079 31129 3085 23409 14518 2478 29724 15336 23279 31130 3067 25074 5614 31131 31132 31133 7439 15053 3234 15031 9437 4974 9934 310 6501 15180 5058 21903 2613 6828 15061 23153 9846 26084 15325 11355 2648 5047 31134 15358 2759 29731 15490 2757 8188 15483 2853 2888 9432 15558 15072 6634 24781 15089 15800 12934 15167 5088 5117 15183 15900 15968 355 5084 15121 3016 8823 3076 3066 6784 15513 25093 6934 3233 31135 16480 15692 7053 16411 12947 29873 3128 16716 16757 9446 5138 16804 31136 8177 5077 3281 17073 3494 31137 9893 16069 17180 31138 31139 3574 29737 18751 30756 2701 5162 17449 8207 24511 17687 17599 17708 17804 31140 23477 17721 5171 5098 3785 31141 18156 23149 14596 31142 2694 18295 16380 18403 5136 5206 18571 5208 12692 4457 18829 18765 20300 18965 5868 19048 5233 19071 25112 28691 27027 19430 19445 19539 12716 11816 8208 9473 25115 31143 19895 31144 31145 31146 20198 31147 31148 22253 20348 7090 31149 20465 13004 25117 25114 31150 31151 26144 389 12335 20487 21261 21164 30306 31152 23579 31153 21146 31154 22295 23590 23592 30933 31155 31156 31157 31158 31159 23608 31160 31161 31162 31163 31164 23618 31165 31166 31167 31168 12369 31169 23631 31170 31171 31172 31173 31174 31175 23641 31176 31177 31178 31179 31180 31181 26505 31182 4221
415 2076 1875 31183 10457 31184 2733 3665 844 760 1996 31185 12687 31186 12809 31187 5249 31188 31189 31190 31191 31192 31193 4280 31194 31195 31196 31197 1846 1247 31198 28099 31199 1808 30137 31200 31201 30157 31202 31203 31204 31205 31206 31207 31208 11618 13159 31209 6184 2947 31210 24628 31211 11515 31212 31213 31214
416 31215 693 29844 7331 28089 1203 29403 24909 7497 7733 5698 31216 1775 778 22025 23789 3626 29850 31217 31218 29831 1061 1576 29839 8250 1104 1372 28090 31219 28688 5203 12427 31220 31221 10145 2521 31222 23892 29359 7418 30611 24443 6030 24392 31223 31224 7263 31225 1712 6544 1792 30827 13064 12589 1649 31226 1639 1205 1145 6370 1732 31227 8867 1150 707 31228 1759 31229 31230 31231 5451 31232 25535 437 1664 2177 11947 23963 8391 1773 724 7267 8395 11886 23887 1445 24219 28068 25047 24702 2923 28869 1671 12143 23899 2023 8831 1682 27864 31233 25549 7749 982 4107 13078 31234 28455 7746 11902 730 31235 11720 28830 1073 6318 975 387 30760 21644 714 729 31236 2015 11205 23023 5649 27132 31237 31238 5425 30406 28218 31239 2200 31240 31241 1881 7234 30033 31242 28675 2183 520 7262 417 24462 31243 30046 5290 31244 22051 28887 31245 1787 1180 31246 7474 5520 7327 24703 31247 4637 5546 2382
417 1918 720 31248 31249 31250 31251 12558 11396 21681 31252 31253 31254 31255 24764 31256 5686 10863 31257 10874 9163
418 7872 5406 6698 8319 566 427 31258 10171 6793 10867 12317 28328 4913 5579 8102 24372 6591 6641 623 615 9510 587 13705 432 9693 13731 31259 259 4982 298 4992 22332 221 14213 6714 439 14397 22108 6721 6761 6769 14804 2580 14928 11992 14949 31260 5561 2520 31261 13590 12929 31262 6787 8414 332 2808 1658 23375 23378 23373 12555 16138 16715 11447 16609 17073 31263 5802 23413 17482 17599 7061 31264 17540 31265 10511 3501 3786 3335 17812 18047 11796 31266 18386 22400 31267 4308 18010 22414 22418 5172 18728 4546 19461 22427 31268 31269 31270 19741 24615 19375 22448 22457 31271 31272 31273 29902 31274 31275 22621 31276 22642 31277 31278 22698 31279 22707 31280 7912 31281 31282
419 31283 27134 659 11922 1487 1770 31284 10273 7832 24380 31285 7833 413 669 1744 9344 1379 21884 29662 11198 52 31286 31287 980 5964 22059 6997 1403 31288 6280 7008 670 31289 5438 5326 6449 1370 31290 22 2426 10864 31291 12588 30573 149 30766 7208 134 28406 194 1200 19 31292 7269 6805 721 31293 12303 775 31294 22034 28 10812 4891
420 24809 31295 9510 5404 8751 150 5434 31296 3297 2773 9063 5604 13188 8775 5442 5354 5351 5605 7024 23674 31297 6877 12331 8049 1589 16 31298 1597 30469 5411 30471 23695 1560 5622 8623 8624 7013 13245 8625 8633 5629 29636 29678 13266 6640 6567 13269 29676 13180 9035 251 29366 6411 6414 31076 6568 6513 31299 11015 13362 27898 7028 29763 6519 7003 12401 31075 10937 9596 31300 25141 6637 9061
421 9561 15325 31301 8164 15989 16227 3109 16792 16926 17165 9959 17846 31302 18444 20121 21198 31303 31304 28783 31305 31306 11157
422 31307 9040 9044 154 166 7867 6944 6945 6948 172 9061 186 6947 9071 25123 29744 6954 6955 6960 31308 191 13245 6989 6579 6519 11015 251 5628 9596 7835 26273 13484 7208 10793 31309 9654 5649 31310 21812 1407 13460 6969 26298 6994 10407 979 7905 2803 7555 24992 5443 7866 23648 9064 31311 31312 29672 9072 12428 29669 31313 31314 6827 978 8825 1375 10847 10849 8280
423 5372 6344 103 23376 31315 8509 1164 29413 6446 8841 31316 8843 1916 12507 25031 22970 29411 22129 419 1352 8477 8000 13181 11634 1162 4656 8483 8750 1987 167 9653 23215 1601 27654 2056 4892 7261 27735 622 5414 6568 4559 26773 6567 22223 22227 13398 7517 9652 28862 22226 1040 31317 1046 31318 5275 9607 4938 9676 1412 13703 12879 6637 6651 26802 31319 166 5383 26638 31320 7724 24000 22040 31321 31322 1058
424 28830 1539 1550 5437 23715 5339 54 21893 22983 5477 28577 5401 27918 27914 6689 24217 21639 31323 9404 25163 26720 8745 30355 5592 25043 24586 26583 967 31324 31325 31326 31327 31328 723 25316 29362 31329 25192 7511 6827 24381 24406 8753 24150 11665 29972 8112 1251 23649 28063 8027 1746 18255 673 5329 8354 6624 24821 24410 6639 24702 6589 11016 5722 175 19 7394 4945 6801 12202 24007 5577 28328 24758 5985 12483 6276 5454 22955 1975 23031 9429 2 31330 10941 31331 1721 5982 6929 6511 8205 13254 8248 29524 1353 6525 4893 12424 25322 28376 13793 168 11336 7212 29363 24097 31332 9423 23027 1606 223 31333 12877 6637 4938 171 10777 2011 31334 1714 7271 13795 25312 14210 12030 31335 24910 5983 12883 28377 31336 12423 6569 12430 11933 2227 24765 9428 6096 31337 1930 31338 26647 31339 4610 31340 2246 29898 24911 1237 461 469 13979 27166 2272 9691 2092 8204 6364 13899 29531 24285 14345 5704 11037 6725 5708 1040 31341 24290 15194 29557 10055 12852 254 31342 24776 16317 22341 31343 24183 12854 12864 13080 15312 27208 25444 2162 28101 25450 31344 6651 24604 29311 2093 24449 27197 10198 10190 6931 31345 5102 12889 13081 31346 29309 29333 27181 7328 24093 31347 8901 11771 11702 8497 14564 26170 6349 11705 444 2344 27295 27241 25323 5751 31348 11700 27320 29310 11703 27324 8128 14112 31349 14605 11745 27206 11685 27333 27290 4783 419 10476 7275 28574 445 11706 6930 12243 10477 31350 14657 31351 27343 31352 11708 5092 31353 25451 31354 8920 1595 31355 14798 579 6305 11713 2377 31356 29323 6740 6767 31128 31357 11709 1817 2127 310 31358 11712 7170 29551 7221 11903 27168 11785 31359 29338 28105 9184 31360 8142 7317 5622 6621 22028 31361 31362 8623 31363 5837 14978 14405 31364 127 31365 23909 686 2163 14513 24305 15172 11715 12904 701 1954 587 24307 24308 31366 27216 31367 2296 1140 1481 22237 15144 2383 27199 28318 29429 8849 203 24611 12928 11626 24310 21690 23824 19459 6027 8490 10221 6787 28175 9169 15251 24226 9174 24222 24225 24223 24224 8621 26268 15266 15546 31368 31369 22207 24227 24946 8936 31370 19766 4658 24221 31371 31372 28079 31373 31374 31375 5059 11738 11716 2910 25333 25535 31376 31377 28072 31378 31379 11997 31380 10217 31381 31382 28104 9794 2121 29312 2980 31383 2446 8159 8625 13384 7492 13420 31384 31385 11769 11204 28100 31386 12527 13066 6503 633 14701 26082 12746 11719 25777 471 12010 24451 2858 6141 16058 8072 29033 29327 6148 455 475 10959 16064 30447 3055 15567 6785 1916 3165 4591 25212 31387 11638 31388 14577 29328 31389 12874 31390 29329 5097 31391 28115 31392 6707 26776 27244 31393 2779 31394 12944 31395 16335 4962 2942 31396 31397 16416 31398 31399 8263 31400 15262 581 31401 31402 31403 31404 5805 5326 24264 16446 11724 31405 31406 31407 5165 5750 15656 1024 31408 9092 23394 9926 2130 6573 31409 31410 4690 6068 8632 14465 5834 15380 5428 11729 9168 25334 11999 6079 31411 8140 31412 313 16748 25412 4943 14316 31413 473 474 15508 22380 31414 31415 31416 14563 5424 25047 24279 10930 31417 24260 3440 10411 24678 8633 31418 31419 31420 29355 29356 738 9668 10416 25042 24343 16970 29343 11753 11720 31421 31422 10637 6196 12789 504 3389 7834 13437 9408 12049 8194 31423 9452 26191 31424 5051 23398 13069 29799 6656 9964 23390 31425 31426 6142 6306 3546 5737 31427 5631 17678 31428 3726 11296 8670 12297 25427 3476 3665 17946 17747 31429 31430 27327 5828 11202 24512 29800 16026 31431 25445 31432 29357 31433 29558 10518 31434 24748 11027 11325 31435 4396 11062 25203 31436 12371 5845 3137 31437 18134 31438 31439 31440 24791 4146 5779 3961 9211 2370 25446 18421 27215 31441 31442 11773 4481 24542 31443 31444 4112 29467 11737 18728 31445 18927 31446 8694 31447 4178 31448 18822 1837 6831 9450 31449 31450 31451 31452 31453 31454 31455 5864 31456 492 17916 15755 18942 31457 27234 3431 8578 19171 4554 15436 31458 31459 31460 21732 29445 19177 26247 31461 3034 31462 31463 31464 10559 14053 19278 31465 16501 31466 31467 808 27236 17991 991 31468 2300 17931 25531 15824 18098 23399 31469 4536 13149 20331 19243 19474 22146 28984 26657 31470 22202 26670 27235 31471 31472 27249 14268 24551 31473 31474 31475 24447 22232 31476 31477 22261 31478 25181 10204 12940 19964 20404 19265 23524 29916 6228 31479 996 12637 31480 31481 8866 26793 31482 24062 3670 31483 12773 31484 10336 19326 2307 29913 31485 31486 10347 28627 31487 27840 8267 5784 31488 31489 31490 31491 31492 31493 5911 20723 20832 31494 31495 31496
425 12036 23986 7224 26743 1459 23795 11783 28663 31497 1486 31498 654 11923 8434 31499 31500 1629 28492 11308 3670 13092 1618 26696 24926 8920 31501 29081 1311 11653 29856 1715 26742 1643 5393 1740 31502
426 26558 28874 24522 31503 29837 1376 2300 23786 6316 29013 6002 31504 5277 1369 24718 31505 1010 24090 27287 1377 24366 1665 774 12320 26217 24487 5622 31506 1737 8624 24023 527 24364 5964 24572 28847 28433 23135 379 24367 5661 31507 29608 31508 28449 31509 8623 31510 12160 30514 8621 28658 28131 24372 81 31511 114 25414 28941 23175 6003 31512 5992 6004 31513 6958 28100 31514 28940 25426 373 24370 6053 5484 31261 6062 2076 31515 25129 31516 27128 23178 23713 24820 5935 25147 31517 4210 24216 8341 729 25082 24592 4548 24994 8632 4839 25170 31518 8633 31519 31520 4968 31521 1426 7778 31522 26216 6103 31523 31258 24369 5993 1006 5631 2021 31524 8670 5996 5995 387 31525 31526 29613 31527 2374 11027 31528 31529 8694 13 24629 31530 8010 31531 6129 31532 12066 23253 9813 9336 9868 8550 22219 175 1 6008 31533 3003 31534 3210 5629 31535 31536 6011 6032 24644 31537 17699 1888 31538 25111 31539 1427 1700 31540 12753 31541 31542 6055 31543 27021 31544 29179 9317 6106 31545 23735 31546 31547 31548 31549 31550 29617
427 1106 118 211 30145 23069 7228 68 180 1348 367 1361 1014 1648 6907 7129 6486 241 1013 8833 1356 1701 1384 6073 7782 27800 59 1379 23787 22026 27135 93 22032 65 1355 659 968 12303 117 17
428 551 13494 30831 28056 7997 2498 12868 6031 14106 4948 7803 12402 31551 987 5616 23707 5615 31552 6601 6513 6734 190 2580 3089 13760 21853 30433 29606 7874 6789 6749 30039 209 6736 7431 14883 8033 31553 26112 4936 4945 3103 31554 4923 5014 6746 28110 29626 9422 31555 5015 6763 6623 6292 7341 14959 13386 13708 14641 23122 6921 31556 14490 31124 10867 31557 14452 14162 24866 12345 21503 6761 15186 5103 6978 8749 11203 30194 191 25089 14069 6655 6938 7437 16385
429 141 103 3075 241 22322 121 64 31558 24428 25549 25545 23976 22326 2150 31559 175 238 90 10811 21625 28356 29410 1856 6943 5934 25378 11637 679 1186 4919 31560 4940 30726 23068 7403 164 337 31561 5987 7228 4938 197 7815 967 12866 1344 14258 220 11006 11217 11234 29416 6348 171 4922 6506 10761 23083 1364 1948 6088 666 12351 8104 29284 31562 326 1237 12935 23687 31563 5466 6830 1063 1924 26740 5087 8839 1125 12171 23056 28865 5304 10098 8951 8864 31564 1115 173 3136 13816 5784 12783 12994 5225 31565 31566 1445 6486 79 1238 12997 890 30798 9490 31567 4956 31568 11827 31569 11843 22046 12187 25185 93 29742 640 1320 31570 102 31571 22062 74 104 7199 382 22030 10820 28229 10826 26592 1293 7478 655 23046 7206 73 24119 1854 31572 31573 1373 6909 6906
430 6528 28977 671 412 6997 31574 25124 29647 31575 25225 29270 31576 10813 25267 31577 31085 22035 8899 31578 198
431 9561 1886 9563 4791 5631 24232 31579 24759 13210 27112 24240 4809 5630 1936 21477 31580 24279 13325 7431 13727 13729
432 6692 11897 6548 5615 1405 21484 24772 31141 25323 29363 7434 24903 28287 5481 6628 7803 28290 11962 6571 7637 11898 25411 31581 8071 5584 6928 121 28379 31582 409 23703 31583 6570 25402 24760 6660 8778 6678 6648 24211 24762 6601 395 439 2011 6622 28376 10182 31584 6636 31585 6680 12348 4958 990 13736 13472 6675 6722 4988 6750 5722 2092 14465 5723 14485 23822 23216 6717 6671 6773 25442 435 4968 31586 6779 442 14408 6765 6767 6713 6690 11318 13893 6645 11903 9149 15336 15383 15241 6785 5043 10249 6760 23148 2879 31587 5103 14750 22186 8526 2888 6632 7001 25096 12111 4493 17804 5168 12371 5257 31588 1122 11798 18310 19626 24612 15145 18384 31467 15056 31589 29899 31590 14841 31591 22498 19544 12256 31592 25315 8208 9477 31593 13679 2784 27039 31594 31595 8052 3510 31596 31597 5169 17293
433 26798 5692 31598 21974 21829 26778 31599 8055 8024 8580 21975 8715 26782 1566 31600 1569 1486 1646 1604 6483 5044 401 393 31501 21843 8552 7776 30473 26779 5182 26794 2320 1657 1618 8709 24563 22025 28938 30478 1756 1619 1069 31601 655 5445 1241 5991 6020 8792 180 1441 1782 980
434 31602 31603 8794 10858 1014 30291 9151 6702 28519 31604 24851 7476 27710 6926 31605 13707 27646 1374 13452 31606 24266 6666 2271 7652 2024 25293 13760 27914 29268 29271 27689 7997 4939 209 21825 8107 31607 31608 14106 5606 10775 26066 12374 6731 14736 29973 27642 8803 7277 10851 6922
435 26514 31609 25540 5930 24012 22085 8000 12028 7730 24834 7995 31501 660 1745 31610 12280 21481 7221 6905 24145 7240 5643 6476 5101 24611 27445 5949 8920 2594 5347 28330 31611 24942 11329 23252 23734 1435 24815 27922 31612 31613 174 31321 8867 26170 28375 31614 5505 29016 4911 641 9769 12607 5597 24115 26716 11733 23058 251 31615 23215 31616 1096 7224 31617 8465 4557 4787 31618 13242 31619 31620 5391 31621 12139 1006 8493 23835 117 6582 4930 233 14024 1603 10924 2158 31622 1251 1848 96 13837 31623 28127 7478 13443 8030 27156 30324 22090 9653 6684 7393 8539 12507 13468 31624 28516 25364 31625 31626 9676 13575 24347 5663 28515 171 8507 25372 31627 25366 8354 22076 30728 26133 1065 6657 31628 23052 22068 5963 31629 6668 31630 22073 7161 31631 25327 167 5466 26140 6027 417 22211 23024 31632 23986 624 22084 23809 29404 4785 12591 24924 5440 8963 8550 26065 29591 6546 27875 28675 24722 13854 4611 31633 12380 2313 9589 27216 25332 13505 696 2115 12184 6100 29572 31634 14025 23251 8510 8500 5228 26720 5516 240 29528 27897 23481 23247 31635 27166 9671 1543 6580 5493 6067 31636 31240 22223 10439 31637 22226 7338 31638 5506 22227 4997 11888 22083 22207 27924 28960 31639 14450 4628 8517 6899 11702 8799 12930 31640 11705 5340 13986 13845 31641 11700 14221 12891 11703 7236 31395 683 8516 4962 11308 31642 14650 14438 29582 1025 5648 1111 22312 22113 31643 30001 4616 1764 11668 21584 25444 31644 31645 29323 14354 2194 15194 28107 1598 25005 780 23424 9430 10646 30144 6393 28087 5987 686 22133 9534 6763 9668 2326 31360 14447 29409 14211 3374 12514 10697 15017 12442 15026 1129 31646 2780 31647 11706 5712 27242 12336 31648 8820 12916 14749 626 1778 9846 12927 31649 26774 31650 24931 12897 31651 15187 31652 31653 12523 2755 31654 694 688 7731 633 12935 31655 31656 24217 14734 22336 15331 2233 9658 1018 21759 6089 15827 15823 8555 2910 30849 22174 2854 6112 8718 16103 359 12529 9860 3088 8543 27217 31657 5713 30465 29437 463 6626 30442 5714 1823 22238 9455 2830 8951 1237 2510 5102 31658 16368 17442 21987 6120 27669 26536 31659 29411 16873 16384 31660 5250 12947 6902 21831 30430 12946 26793 4548 7442 28580 5736 31661 23383 28530 7327 31662 23074 5149 790 31663 9221 27670 31664 4559 13103 31665 31666 18041 16080 12541 1839 8538 31667 10483 3177 26666 3380 31668 17045 6893 1172 5134 17303 14975 31669 31670 25305 12783 26643 8170 17220 12548 9457 10724 28611 26668 3592 30856 10507 12787 10274 17427 11795 9465 5792 31671 15068 11051 7788 12708 30154 11452 3489 31672 11739 16793 31673 11056 27806 31674 18414 9899 1841 29462 31675 31676 6885 30744 27713 5146 5794 31677 3452 11415 31048 22061 23407 16874 3898 856 4018 17270 31678 25626 28931 31679 9689 1850 6889 22231 31442 23385 31680 4724 26998 12809 4439 10552 12942 3989 5791 31681 13139 26736 31682 8986 5459 31683 6197 19137 31684 30490 8420 29473 31685 12356 10298 662 27821 31686 13119 12693 31687 2057 26724 29477 28535 30705 31688 12714 31689 3513 27809 4729 29448 5881 4167 29913 12820 26731 10323 2969 5257 31690 319 17809 31200 19449 30920 12825 19957 31691 27334 1276 31692 31693 19021 10314 27813 31694 22284 6177 20496 12833 12455 5905 31695 10024 11088 31696 27448 27346 31697 6230 30938 22288 6171 22293 22297 21181 31698 31699 9961 31700 31701 17188 31702 4854 30804 31703 22307 11809 1336 8066 31704 31705 31445 11831 16514 31706 31707 31708 29920 31709 31710 30439 1787 10660 10676 31711 20466 31712 9014 9955 11845 20324 11814 31713 31714 31715 31716 31717 31718 31719
436 5471 2102 7238 4938 136 17 1017 2388 9363 26483 8879 1033 8554 1008 5102 3101 31244 5117 28675 28823 1104 23176 2376 24860 4681 7184 3207 9402 23457 9319 44 7300
437 8249 10775 24871 12589 1901 12345 28159 23033 31720 24856 26482 11 24167 27731 31235 6992 24847 31721 27485 31722 31723 24543 26923 10824 6809 91 28308 31724 26574 31725 30779 25499 31726 792 28237 31727 31728 31729 31730 12750 31731 10971 2393 31732 31733 31734 4386 3911 30893 136 592 6147 4202 10047 8190 19304 23696 18440 31735 4027 31736 31737 31738 31739 31740 4150 31741 29621 4212 31742 31743 23485 3156 7417 6497 4737 5622 30346 31744 31745 27606 19825 31321 20331 31746 31747 31748
438 31749 5696 1006 1924 26474 8526 23881 7259 26589 12151 13 31677 12077 7350 4551 4717 9393 4270 2462 455 31750 31751 31752 31753 31754 8447 640 11661 30270 114 180 379 1719 5964
439 26287 1663 12654 31755 31756 31757 31758 31759 28339 28325 1393 31760 8847 31761 23419 801 13110 11431
440 1868 5354 9510 29817 9067 7580 29821 27481 7193 9046 13218 12316 31612 5363 13266 12313 6568 8785 27487 29822 9589 4922 10994 13315 8767 11227 10747 9595 31762 9600 29250 31300 29678 25141 2081 5820 12342 13552 615 6631 9616 25067 13335 9639 13705 30124 13749 9690 8739 13903 13868 27870 9681 6710 24844 9730 25618 31763 9692 204 14071 14065 14066 25630 9743 9725 14169 2270 9984 9985 12181 6742 30125 26154 9204 5442 2327 14019 6753 262 9760 2363 31764 275 25527 14528 14590 14587 9778 9775 31765 31766 29698 11038 10794 14776 14313 9433 8091 321 9434 15079 31767 15200 9833 25814 9167 15347 31768 15408 8814 9435 15557 14948 29747 15684 350 31769 9871 15697 6291 7064 30128 8817 15913 23351 15991 27218 3084 12959 8824 16205 23393 27219 16360 16380 16405 16558 16552 10257 16726 16764 21811 16888 10020 31114 3356 31770 9454 10263 28337 26159 10051 17312 9463 17175 17459 17542 17540 17579 3824 31771 3765 17927 31772
441 5339 6628 1798 5663 4776 1803 8066 4589 11911 12873 6636 4804 12883 2246 13260 5749 2269 6407 1838 6705 14637 25174 25179 2832
442 1433 374 31773 7487 632 31774 8526 7253 9357 23834 7246 31775 12765 31021 7227 22962 28952 7293 31776 9325 9366 5669 380 31777 1686 558 31778 555 31779 31780 503 27078 395 156 23143 25410 1423 7394 9329 7319 9359 4559 29569 1554 29584 8532 3448 8058 586 12048 9373 27601 12229 4938 1402 23720 9361 25224 1920 11892 5203 23984 12423 5286 24555 4551 580 4593 6007 30436 4588 9386 7256 4607 4621 25057 387 5308 31781 11920 438 4815 31782 1770 26884 2153 584 2374 2337 24305 24307 24308 24310 21690 9384 8703 31783 24285 7325 2658 2376 2387 5657 9394 2516 1935 9170 11992 31784 2151 7341 26789 23288 25019 31785 9603 13179 2867 3070 27905 2812 2801 31786 2787 5782 13 5798 2817 27077 30523 2882 4655 2758 7693 25146 1431 31787 13703 2087 30450 1577 16125 13962 5591 14886 14139 25005 7660 31788 5683 14023 14589 25150 21545 9667 31789 16190 30512 31790 21814 23413 7029 5654 16749 8910 23079 27752 13477 14351 29273 147 7462 3762 1229 90 31791 31792 30469 10545 7845 7449 23776 7785 7374 2692 28595 9849 14235 14802 5305 1507 3706 9565 28955 15254 16391 31793 17057 14659 17359 23449 14554 13417 31794 23333 4150 18534 14168 18074 15253 13686 23343 23342 27893 1424 11503 8478 31006 26805 31795
443 9495 9080 7603 5631 2131 9088 6276 6279 13657 31097 14149 31796 14152 12181 14257 9747 13973 9732 14430 14523 31797 9768 14753 9789 532 15458 15560 31798 15885 15842 5706 10247 31799 15954 16151 16340 16342 31800 31801 16747 28030 17091 17108 31802 16986 31803 810 17229 3344 812 17393 31804 31805 26602 31806 26601 30153 11452 17701 25002 31807 8554 3894 21519 3775 17903 31808 17952 31809 31810 26249 834 31811 4139 31812 24521 30155 4217 18283 3030 11061 31813 31814 18358 861 12114 4178 13131 10546 860 31815 863 11471 31816 31817 4329 11068 31818 19461 4279 16305 31819 24551 31820 31821 11515 9271 11140 27453 31822 27630 31823 19348 31202 4290 2916 31824 5896 11093 31825 31826 13014 31827 7847
444 31828 22078 24360 29225 5329 28137 7394 24900 1104 975 12169 31829 1486 23824 5111 31830 5182 377 31831 7504 31832 1743 7986 25402 24865 24862 21619 31833 1709 23118 24863 24869 6548
445 7828 334 9977 21794 25328 31834 25565 10 28695 25543 25261 11267 31835 13171 22062 9075 9495 7797 27947 10472 7821 25544 10991 1868 27953 27985 5784 5204 1854 18642 1252 17547 12454 7798 27723 26527 31836 6617 7522 10982 7701 708 43 29257 6441 3566 29260 8273 6443 57 74 7815 7639 6828 382 5626 73 11210 31837 12487 10829 27377 5616 149 11285 11270 11271 11289 27356 11282 25605 6858 27960 29673 9046 5614 29688 7531 11874 394 7803 17996 21894 38 21483 2 31838 25235
446 25524 9585 9591 3107 25141 13390 13622 31839 7665 13739 176 31840 9672 13958 13959 13966 14242 12181 7649 13787 14392 25140 14581 14502 28791 14137 31259 14596 9799 14830 14898 15130 29253 15198 9834 12189 9543 9548 16814 17780 17864 31841 12199 18449 18694 31842 18812 18865 18979 13861 19075 19086 19268 31843 19629 31844 19850 31845 20528 20522 35 31846 20901 31847 31848 31849 31850 31851 31852
447 5353 13375 9748 15304 15597 15715 30684 12753 6448 7632 31853 31854 31855 31856 31857 31858 31859
448 5353 9749 19331 21047 31860 31861 28780 31862 31863 31864 31865 31866 31867 31868 31869 31870 31871 31872 31873 31874
449 6668 23787 5466 620 1633 21620 1770 24960 5642 1791 21476 103 22084 23058 10409 23529 31875 1006 31876 679 5101 31877 116 31878 1082 22314 31879 1084 28117 23035 1090 17 8029 2102 1797 1428 1690 5343 11931 10147 79 22223 28177 1649 31880 28539 1350 129 696 700 28904 1746
450 31881 23143 974 10798 18431 1458 25057 24145 10791 10778 1628 1804 1916 1429 680 28314 691 31882 1697 4616 31883 640 4653 31884 552 31885 10160
451 8838 2749 23747 24260 25218 24037 11297 7752 12770 31886 8866 31887 27077 7221 1392 4885 10793 31888 26567 31889 8550 31890 29553 26473 12044 1743 31891 29308 2121 8794 11400 31892 11414 12515 27762 29020 31893 1915 31894 31895 31896 27079 1364 31897 1465 11314 11198 27085 1010
452 54 1923 5425 5654 5958 732 734 22222 26269 11296 1332 1742 31898 10457 31899 12048 30018 6020 30727 5298 5294 8913 5439 1096 7929 22118 6079 22114 31900 2314 9201 7340 1688 6374 1721 12266 28375 5115 968 120 26756 24220 31901 8943 6376 3014 12050 24951 4688 30331 31902 3590 31903 31904 31905 8784 31906 23982 31907 28934 9245 31908 10785 30873 7321 31909 1711 866 31910 11072 31911 754 28873 31912 31913 1305 31914 1310 31915 31916 31917 4598 31918 31919 31920 31921 30646 10396
453 7478 23064 12275 24101 1751 7782 4051 28588 23653 1391 21476 8482 10834 725 9593 9620 8863 27445 774 31922 4785 6523 5267 5678 16 31923 26745 8071 7504 31924 8253 24770 1367 438 11920
454 159 566 1871 7756 1384 46 31925 31926 12033 12858 64 12331 31927 21868 211 8750 986 9099 8472 8619 6582 154 150 1579 24994 10954 251 1592 6909 2028 11201 121 66 6513 12866 6564 276 12 4892 6886 90 1734 11208 968 101 120 11207 721 679 3353 167 8066 6943 22098 8493 213 8105 31928 576 24879 22971 6508 179 30438 4981 4888 5820 13242 4940 13569 286 5370 171 6568 114 373 0 13 8792 65 31929 26829 6601 5581 7803 5584 5615 168 328 31930 9639 6505 4963 428 8050 12437 8118 192 29399 164 4982 13736 52 7 22 225 25135 138 6641 41 1031 31931 126 13868 8062 219 294 13648 14085 5346 27483 13687 6590 238 10930 1103 9650 265 693 6723 254 268 29284 74 7877 8341 9758 5406 5102 14391 6076 30275 600 31932 6754 1311 25217 29725 31933 28598 2374 128 140 117 14668 5286 1242 21819 310 5929 31934 77 67 13468 22055 7721 5512 1631 107 6830 21796 12352 24948 6762 31935 27658 11627 8742 14620 30580 123 12917 31936 1140 6783 15199 431 21800 1372 10791 8286 9854 2748 15294 10228 1792 1816 355 8198 10503 10488 5086 9865 1997 96 31937 1014 118 24263 1125 6879 14712 8140 473 474 8192 16404 1459 15090 6883 12949
455 31938 1806 31939 31940 24260 8325 31941 114 29540 5962 647 7552 29324 7002 28100 5655 31942 12423 9591 6530 376 26698 8302 12484 31943 26160 31507 31509 8532 102 1550 28366 8624 5199 978 1624 6274 643 31944 31945 1534
456 956 954 5491 6793 5404 404 8803 6292 6797 5341 31946 962 1574 6603 987 5821 6921 5405 7803 10867 5370
457 31947 12384 24168 29367 31948 24153 10764 398 8038 3564 28232 394 5599 24943 5725 427 31949 12877 12883 2246 1798 11771 3165 21669 21673 5716 6892 17627 5182 31950 11982 28088 5044 4336 27797 397 5113 23814 401 24958 4494 4337 399 11974
458 22989 7815 11270 8069 24864 8626 25550 5653 31951 684 25647 31 27722 28922 31952 388 93 10848 24707 1251
459 1427 1882 374 26215 28162 31953 8326 373 7482 6523 447 31337 9404 24991 28269 24141 24234 27117 375 2525 376 5654 30477 31954
460 5631 6405 27487 31955 31956 31957 31958 21772 31959 673 31960 8648 25257 9062 25284 9063 8670 31961 14051 21982 5041 359 31962 17442 9868 5728 5109 9223 8192 795 27559 16947 481 1836 5157 16432 15629 17371 31963 31964 25404 5777 16816 17187 15104 31965 8825 528 17627 31966 31967 9873 16119 3210 9952 7704 27587 17641 2939 8194 17699 17777 10899 10894 6897 5844 31968 17858 18927 7705 18989 18589 4302 31969 5255 19326 11115 13028 8243 31970 21419 31971 31972
461 8898 11783 23715 31973 29227 1628 1490 978 643 13072 6530 5113 31974 31975 8886 23782
462 27658 28830 25031 613 5247 26651 25351 656 4559 1133 27222 26812 1731 1075 8718 8526 8437 23962 1063 1212 22076 22071 5343 551 117 23728 79 31976 7260 5988 31977 9367 12153 2056 1469 13575 28514 4608 11960 7778 1771 11630 8932 1006 6041 26169 2280 696 31354 23192 23803 31618 27207 31379 31978 31979
463 31379 1623 2512 2533 24358 11736 2437 28556 5780 31980 26675 12809 24782 31981 31350 31982 3046 31983 31984 31985 27461 4236 30138 31986 31987 31988 27465 31989 31990 31991 23644 25501 22452 31992 31993 31994 24623 31995 31996 31997 31998 904 31999 29125 7888 32000 32001 22528 32002 32003 7892 32004 32005 32006 32007 32008 32009 32010 32011 32012
464 27080 636 1997 4582 164 7211 5522 1430 4895 32013 5511 32014 29730 7216 32015 4505 23015 7726 10146 650
465 427 11648 2458 25356 24946 621 674 28408 28187 28216 1539 17 395 8869 8855 32016
466 11551 5471 32017 8131 1041 23737 1789 10842 659 8853 32018 32019 32020 11620 1452 30379 7477 6539 26703 8325 24444 1198 13092 32021
467 29384 103 679 8841 8859 7196 7398 4598 12876 2268 4955 23106 32022 29517 1031 11738 5012 21481 31564 2278 29328 32023 3207 4429 2361 1513 5466 22342 10637
468 28187 12505 32024 32025 28463 25423 32026 8449 24094 8448 32027 11646 32028 10759 32029 32030 5291 32031 32032 32033 10696 32034 24144 3540
469 462 11414 789 11480 787 22175 3365 12632 11431 32035 11448 32036 3758 4716 32037 32038 32039 4700 11055 5847 32040 4719 28347 4245 4737 13140 11572 5874 30903 30540 26618 26856 11097 25512 32041 8990 13156 23540 31202 13129 11072 32042 31997 9298 32043 32044 32045 32046 32047 11581 32048 26967 24665 10381 32049 10660 7893 11128 32050 32051 32052 32053 11609 23622 6261 32054 32055 7890 22651 23937 32056 32057 32058 25520 32059 32060 32061 32062 11605 32063 32064 32065 32066 32067 32068 32069 32070 32071 31715
470 31099 24849 12336 32072 8101 32073 28071 9325 26787 32013 13711 32074 1814 1819 4648 32075 28947 8959 26192 3225 12788 26645 3729 4713 9259 12105 1170 32076 32077 18161 26671 5564 4728 9893 18880 4272 32078 32079 4363 22241 28687 6816 28610 24588 10739 27010 13004 26948 9283 23544 11532 27014 28625 3005 27015 32080 12732 10742 12360 32081 32082 32083 24650 28636 32084 25376 32085 936 25379 26505 32086 30809 22268 8374 32087 10039 32088 32089 32090 32091 32092 32093 12373
471 5663 2710 32094 4847 32095 32096 19171 32097 32098 19381 32099 5883 26137 32100 28876 19421 1253 26247 19706 10305 32101 32102 21543 1260 8239 32103 8994 27347 10362 32104 26201 21154 23097 32105 5907 32106 30216 32107 28877 32108 32109 32110 32111 32112 32113 10644 8221 32114 32115 7132 32116 11851 32117 32118 32119 11846 32120 32121 32122 28202 32123 32124 32125 32126 26261 12652 32127 32128
472 32129 12315 13171 32130 32131 32132 32133 13190 9078 9557 9029 9088 7606 7605 21854 13199 5384 9031 25197 13207 11010 6279 7533 12332 25044 23651 32134 13272 9103 12313 9101 7610 9104 13289 13974 13230 10885 21793 13274 13308 13291 32135 13316 13327 13329 9591 9518 32136 373 13 13358 2923 5359 13360 6323 8654 4921 2030 9513 2037 32137 27991 9507 158 185 7650 13397 13295 13218 13375 13390 9109 8661 9036 13402 13340 9509 32138 6530 8328 396 7254 32139 23080 716 733 13428 13433 27508 13416 7543 13430 6621 13451 13438 13453 13440 9122 13460 13351 6550 12339 7616 9624 7394 11017 13484 6341 7614 4944 13467 32140 13523 13514 13512 24249 13469 32141 9609 9613 13717 13584 13592 13537 13551 13616 13600 13621 13610 31339 8666 13646 8670 13566 13631 13632 7621 13663 29981 2066 13436 13678 9633 13517 13661 13662 13667 4972 11658 7750 5547 8676 9643 6805 13712 13660 7424 12047 512 13751 32142 4966 13747 13704 4970 7622 92 13721 13734 13672 25048 27994 432 11020 9142 13762 13724 13702 13726 13737 13777 32143 207 7023 9651 9140 13644 12179 13812 13823 13827 24268 13832 32144 9646 13811 13758 9654 13863 29350 32145 13867 461 12183 9690 499 32146 32147 6655 13904 32148 13872 4995 13908 13909 9673 13939 23226 8677 13928 13798 13958 13960 13975 286 335 9145 32149 9697 32150 12059 32151 24277 469 13935 14045 6726 9687 14055 14039 9700 9701 13982 14078 14263 14122 32152 252 16190 32153 32154 14488 14522 305 14952 15082 9828 14579 14803 15221 15161 15294 14773 15571 9851 16485 16405 16337 16488 16525 16483 16399 28027 16579 16585 16639 32155 16594 9903 16602 16739
473 32156 8354 6929 387 4806 6930 8128 509 8652 13099 8225 25949 20331 542 17420 8226
474 7038 13668 8051 25324 32157 9035 6637 13629 13707 225 0 14106 12963 388 6656 6619 2407 32158 5381 6774 30394 223 5020 5043 10797 6785 16195 16138 5103 14412 10866 21995 16887 8082 27614 8016 30692 17403 6723 5168 5784 8196 3813 17374 16404 3826 19869 6501 8278 10 5592 7410 6623
475 12130 29266 7821 6416 5627 6419 10997 6423 13794 32159 14448 32160 25724 32161 32162 32163 25865 32164 32165 32166 32167 32168 27855 6424 6952 28698 9048
476 11216 25542 11938 32169 12143 29758 32170 11221 27726 723 6419 9973 25550 25571 27126 11223 7417 22061 32171 8323 27734 29100 32172 6624 11915 7412 10156 25554 391 11335 5497 5113 2010 2062 4933 4922 90 8005 31632 650 25548 11232 28679 31625 32173 574 11217 12865 1932 25139 28329 8493 41 2111 23763 32174 6517 32175 10476 4590 28232 10439 32176 13311 2212 8715 8440 7034 13621 32177 24709 30464 12140 30473 25580 30007 11319 24075 32178 13716 11941 8058 13409 13766 24357 15312 2092 1924 32179 26830 27870 22002 7413 6020 23798 32180 6343 30766 2207 32181 32182 1960 32183 32184 7307 30269 24078 22199 8788 24355 32185 23297 4610 8505 4609 30410 24045 2296 6805 32186 32187 4500 32188 2330 27232 2297 24374 14287 14521 28672 32189 445 26077 5033 6759 780 1641 6881 30421 10184 26107 32190 28861 2463 26075 32191 15262 12512 10224 7666 32192 7446 32193 2532 5081 28669 32194 8520 32195
477 32196 32197 6396 32198 6492 32199 1392 1649 25144 2271 2237 23802 10743 31421 28702 32200 5188 32201 32202 4381 3790 32203 32204 32205 6356 28050 32206 23600 32207 5976 7746 29340 32208
478 32209 26776 6920 32210 10693 17 22068 29760 3564 22379 30721 21625 8532 1006 12479 1073 628 10775 23143 12386 6580 6581 1541 379 5339 7408 32211 8248 8866 6583 7212 6076 4571 12507 1352 8047 5963 7780 8496 387 4958 7275 31361 5599 7196 28932 432 8029 8002 27201 5383 1042 10446 180 22092 31587 603 32212 12877 13434 7390 24827 171 2268 32213 8263 136 8918 5690 8748 32214 8738 2374 27749 12875 8066 26788 22088 4616 32215 32216 1017 8030 1504 13060 9404 1355 6767 31000 32217 9397 5546 1563 11704 24802 26178 1108 14271 1574 12883 2246 11645 8901 8910 669 24031 29447 5989 1028 2406 9767 1114 29530 2441 7221 23743 12450 27750 5385 26778 10469 31350 32218 27751 10443 11745 4821 21663 14159 4565 13210 32219 30533 220 6714 13090 10520 8514 28346 1003 5108 26772 25404 23366 5102 11741 8542 1140 22164 606 32220 28512 8787 22191 6170 8951 16348 23364 723 1975 5097 26790 8043 3373 6631 28521 24842 28394 4653 457 7642 27701 2687 32221 12510 31812 836 480 9345 4798 9824 15893 28178 15919 427 11056 10518 5172 847 31425 32222 856 6061 4856 1170 31964 11881 24932 12691 31442 10582 5042 9364 1426 1546 6708 6908 28332 30501 9448 12807 13394 4827 6285 8703 8599 12979 9385 9341 28389 1348 5430 15824 9330 24558 25223 27153 11779 26853 6582 32223 4794 14975 729 5790 31773 14936 8140 32224 32225 28338 1428 5712 5650 22223 16805 12371 1308 25110 26854 19759 2751 28583 6508 13017 32226 13786 23489 24626 28875 21149 14907 6785 4292 686 1539 1550 9859 30693 5370 6637 6254 19183 10284 23514 28878 5625 32227 18037 18123
479 8846 13197 8378 32228 5198 8899 29521 8424 8863 27449 1924 32229 11942 11941 11943 28587
480 12423 114 21684 12854 10770 27122 6042 8249 24289 6809 24290 32230 7200 25162 26577 31720 23909 696 27536 12430 21745 30817 1956 21751 31945 1986 10452
481 26653 7289 12536 28922 1931 11328 7208 12213 11412 27858 23183 1923 32231 32232 2082 32233 5307 8295 7168 29095 1978 7250 8879 32234 2048 23236 2721 1809 32235 1047 26484 32236 1926 32237 5480 32238 32239 7161 24021 32240 11411 29017 6803 32241 31252 413 12149 26513 7145 32242 7261 28462 7158 5991 23205 7152 28461 11361 5518 11482 11492 5504 3993 1036 32243 7147 21897 23874 25167 8438 24396 1973 11353 30037 10793 11429 11355 2139 32244 23221 32245 29014 7303 23849 7280 32246 32247 12052 5281 9328 8289 2072 5317 23254 8308 23256 11363 7309 32248 32249 11366 32250 31020 30045 7328 2360 5515 11357 11358 11352 31895 2388 23645 29026 7148 2133 12676 11385 2277 32251 32252 7857 12451 31630 5535 11371 11369 5566 7163 28412 23280 4824 5316 11420 29028 2218 23262 11389 6044 2470 7268 13079 32253 11386 1933 7858 12244 32254 7285 7172 2723 5554 7142 22344 2184 2324 7174 5775 23282 11373 23285 31883 29278 2396 32255 32256 32257 32258 5540 7171 10079 12245 2489 578 4642 2423 31253 32259 7180 11391 23284 32260 2219 11396 2817 6050 2240 2385 32261 32262 23246 12248 7166 5664 8300 11388 11583 32263 11387 7440 3590 1927 30070 11347 2518 10795 3756 10873 7862 11348 32264 23230 2563 8911 5543 7176 23290 9333 32265 11364 23293 25148 32266 32267 7162 11390 7340 11394 5548 23174 11674 32268 32269 12533 24436 23369 2814 7169 32270 10206 12578 2149 7181 11422 32271 10856 2831 8285 32272 24779 1808 6467 10101 1995 11453 2646 31255 2936 32273 7173 11375 2613 9997 9398 8919 5556 11458 28464 11397 11350 32274 5303 30084 12252 30079 12151 32275 32276 5314 12532 1803 12083 2838 9396 4126 26834 2624 23283 31254 32277 32278 32279 9190 29061 26833 32280 31790 32281 29063 11410 3012 32282 12542 32283 12748 32284 7842 29855 29064 11365 2887 11382 29050 31037 32285 26837 32286 32287 9170 3069 10247 26607 11655 32288 32289 32290 10842 23365 2905 32291 23370 5324 4677 32292 7360 23382 11401 29068 2496 32293 3048 32294 7183 7310 29067 12555 7179 8306 10150 32295 11413 29021 1489 2718 8315 3568 32296 11423 11428 7153 32297 8950 1049 12565 13746 1043 10188 10841 23281 29060 2625 5333 12574 11418 11415 8433 5322 23417 32298 24440 12667 11402 7184 32299 1916 1815 951 32300 11383 29070 32301 27868 7155 11439 3100 23204 11370 31250 24781 3401 32302 30675 12666 26269 24395 11406 11450 11409 1044 4815 2787 12581 3328 1474 7259 32303 21963 3125 11408 7182 3235 24498 23437 3239 23429 11430 31018 7848 31021 11545 3535 4188 32304 22385 6172 30107 5319 32305 30408 32306 32307 11451 32308 32309 32310 32311 32312 11454 11436 7363 32313 11474 6136 32314 28417 11443 32315 2524 32316 23371 24057 11506 32317 32318 31248 23457 3619 32319 32320 5679 28556 32321 3771 11446 2940 7975 7194 12576 32322 3521 8964 28454 11511 32323 3367 23472 32324 32325 4030 11438 32326 32327 7170 24058 11468 18101 32328 7683 4201 32329 4220 32330 11435 11496 3854 21522 3933 32331 32332 4364 23451 3463 4287 3969 11434 32333 21965 3848 30101 32334 3884 12501 4255 32335 23504 4262 4318 4245 32336 3623 32337 4072 2753 25107 3881 11565 3516 32338 25496 32339 4132 11105 3130 3317 11303 11493 3451 32340 4464 11572 11475 12632 32341 32097 11508 4024 32342 912 3935 11476 32343 11501 4518 4191 23523 23517 32344 23865 32345 7900 32346 32347 13153 32348 11495 11486
482 395 23133 32349 32350 32351 701 6316 32352 32353 23117 23127 11948 25228 27152 11336 718 2191 7009 21648 1809 24577 25399 26708 28939 24046 5492 373 114 32354 32355 11776 32356 5757 32357 24024 27913 28361 12459 5429 13 28364 28387 21650 30998 6000 673 13894 22997 6040 14343 24944 32358 2374 8847 28416 4938 15057 32359 28290 5730 6765 2598 14828 26898 32360 32361 2306 11910 8336 15653 5078 31359 9198 462 700 11257 9205 5728 5552 10261 5748 5146 1176 24475 12780 24063 9951 32362 3433 3690 2965 31060 9960 16377 32363 3574 5802 32364 10512 17541 10280 28682 3669 28508 3921 3849 32365 18145 9266 23515 7897 18442 8979 1222 24547 5857 32366 31815 6938 32367 32368 27003 31187 9252 27007 25371 3992 12113 32369 26675 5863 32370 32371 5867 3965 917 32372 27046 21622 10297 32373 4748 26247 32374 32375 32376 32080 24752 22264 20855 12646 6215 6021 10373 10744 32377 26977 22296 12743 32378 32379 25508 946 32380 27073 770 32381 32382 32383 7090 32384 7044 32385 32386 15513 22163 32387 32388 32389 32390 32391 32392 31276 29184 32393 32394 8696 32395 32396 32397 32398 20372 32399 32400 32401 32402 32403 32404 32405 32406 32407 32408 32409 7746 1594 25169 85
483 2521 5217 8323 26569 31897 640 4891 4892 28437 10759 551 103 12220 1393 379 4922 28050 90 9975 4931 4925 5750 1758 12056 32410 387 31893 1658 2369 31672 11759 30025 17924 32411 32412 5188 32413 27594 24070 26671 32414 25144 12478 26636 28056 114 373 26300 32021 139 32415 5608 32416 28054 10 32417 32418 6317 1670 2923 32419 26473
484 27213 9310 13067 8755 29366 7803 1603 9311 7288 26800 5584 32420 11718 427 6533 6602 32421 6601 13212 25223 29877 6863 27583 32422 32423 2268 6734 13458 21647 6767 6930 6902 14975 7138 4807 2757 12900 18050 12797 17858 17719 28238 29110 28349 26220 18384 26854 864 28107 26858 10594 27294 5883 32424 12743 32425 32426 13044 12843 2455 6191 32382 9718 32427 9490 5380 172 11665
485 26883 13179 8007 13345 7196 90 8490 576 4585 9339 4591 22109 2485 27020 21004 32428 7787 1402 32429 28600 1230
486 191 10419 5703 1752 29894 1712 1710 251 11936 2591 26879 90 31 56 103 32430 696 5628 605 700 10409 8248 29612 1538 107 166 32431 8110 29673 26624 4892 105 13415 27132 32432 5851 11626 24260 686 9668 5991 672 387 32433 8472 11637 8626 12281 286 8486 28523 186 11202 11205
487 5440 32434 1087 22081 23214 7237 1164 28357 29421 1697 6076 4922 11306 22104 22100 24139 4997 7243 12271 1592 25216 196 27898 12036
488 5477 5578 172 121 5630 13262 5338 440 251 22082 6591 32435 8048 10930 25066 32436 26218 1803 13533 291 225 30574 29018 286 9650 22077 13689 6701 4977 4997 13930 335 8127 6724 10716 14122 3234 255 2231 8134 14357 11375 6751 28401 14548 14555 9758 12444 9786 14426 32437 9815 9821 2757 2759 15493 15527 15593 14585 7374 16000 14769 32438 32439 10533 16468 8681 8169 15971 9446 31029 16679 8864 17142 3416 12751 17599 27578 32440 5186 18036 3816 5814 12677 5811 3321 3627 18050 17857 18077 23484 3974 19897 32441 12804 11324 17356 5172 18134 22224 32442 32443 22003 12690 5858 18765 12684 22231 11071 18656 28617 4456 8986 4338 12701 19795 18059 18651 8217 31045 18109 18589 5867 5868 32444 18867 19381 27623 17888 18623 17509 1851 12009 32445 32446 19351 8410 5256 20005 19835 12723 12722 12724 32447 20337 32448 20346 18063 19986 30920 20566 28172 19880 27250 6190 20932 32449 32450 21534 21404 6204 23577 6203 21182
489 32451 32452 32453 32454 29254 32159 31312 31072 32455 3459 32456 31096 32457 32458 32459 32460 32461 98 21782 29679 32462 32463 32464 32465 32466 32467 32468 32469 32470 13950 32471 9124 9632 25140 32472 9081 14693 32473 15372 15608 304 32474 31839 13614 32475
490 380 6773 1954 29304 14485 4997 2779 6765 6636 464 6622 5248 6722 447 6571 432 13894 21826 23279 379 32476 5837 25423 32477 6767 8248 32433 2148 5730 1024 32478 2826 5078 3076 6938 12402 3085 5616 8871 4968 5036 2726 3440 5129
491 29883 23459 24166 6560 1550 29877 32479 9404 664 32480 31619 19561 987 23990 32481 23471 5454 5471 28333 32482 23430 7720 10161 30774 5277 29881 1539
492 5404 5406 956 6978 32483 23212 5433 1925 6657 7996 4907 5823 5498 4923 121 6619 6571 6513 1565 6582 1557 4922 29874 719 5615 9560 5581 4930 2044 8101 6601 6622 6624 1871 12879 6656 6620 4945 6637 13582 1602 4938 4935 6636 6644 13706 27360 432 3067 9631 4966 6660 23873 13784 168 6671 4944 4968 28972 4973 2079 4976 4977 8066 9920 6289 6743 13312 4982 6721 6719 23241 5580 14000 8813 4928 4948 6722 13786 749 30193 3234 14177 1582 1017 9634 14311 5008 254 5014 6633 6789 6655 6710 14451 25072 30805 6761 6983 25075 8064 32484 8117 9678 14268 32485 6763 6618 6774 6760 5070 32486 14498 6708 14909 8147 30367 5041 5544 310 8003 14159 7439 6785 14912 164 2694 15167 8161 5043 8102 31767 5058 24830 326 10815 2757 6788 31134 29723 6934 9846 13792 15485 1003 2648 14162 2759 30194 8127 27922 32487 5077 2363 32488 15067 5097 13498 16621 6773 8134 5375 15160 30562 2879 355 15785 8170 2961 12710 8152 6871 25324 21910 32489 32490 32491 8168 15896 6676 28119 7982 10190 4937 32492 25090 220 5123 29358 12947 32493 6899 325 32494 16369 6882 2878 32495 5141 16887 5087 12665 5138 3369 2602 6885 5109 9223 17062 6154 29448 17060 963 7047 10483 16992 5047 32496 6890 3450 3233 3560 11799 3574 5794 8186 10021 6892 12782 12788 8154 17599 8207 5161 3452 3825 25098 8189 32497 9249 8190 7745 11082 5186 12801 10511 17638 3738 5171 6897 3785 3741 6940 32498 2952 12804 18049 31431 14283 28348 12810 18177 32499 18403 12371 5206 8201 4125 22231 5713 18765 32500 24547 5209 8987 4338 18625 516 5208 8986 12701 18635 10540 12700 4456 26219 18867 1252 12794 20300 28034 5867 22005 28691 18389 8194 19199 5233 18001 9471 32501 12356 19361 20907 5259 5258 19317 12808 12716 19496 19230 19837 10590 16784 28958 18161 12703 10323 10295 12693 20087 32502 12718 25115 12753 19903 19986 12827 20111 20557 20337 32503 20446 25119 6496 12723 8237 20223 5214 20634 20465 32504 12833 32505 7341 26136 12722 32506 28625 12734 25117 12365 13443 9989 18823 21092 23577 20975 30306 21132 10605 12685 12367 21393 28555 7110 21411 32507 22293 32508 26141 32509 19445 10366 12364 10609 28636 32510 12363 22304 25506 32511 32512 32513 32514 32515 10382 28994 32516 32517 32518 30976 32519 23590 13046 10379 32520 22022 32521 29870 32522 11821 20439 10615 32523 22490 20888 11824 6883 32524 32525 32227 31165 12850 7470 32526 20667 32527 10681 32528 10662 32529 950 30205 31178 24612 32530 32531 23641 32532 23643 32533
493 5442 13186 5354 23649 6606 5349 9069 32534 5381 6580 8000 5581 13205 5346 25063 8750 13242 5423 7252 4907 5823 5363 6515 9589 13974 9426 24810 6602 5628 7517 13722 9693 6708 9678 6719 4974 4982 6712 13895 12508 9695 8788 4968 14354 254 14518 12914 7138 14792 6783 14636 14618 14828 8147 28970 15336 32535 9757 5015 9437 15115 15199 9833 6788 5097 25342 32536 15655 15616 15911 9865 15946 15962 355 9460 1814 5250 9476 9198 462 786 10254 31800 1823 8173 5713 28340 16752 12659 794 9457 8957 5743 32537 3891 5764 26028 23444 32538 17123 12630 11799 3574 11425 24058 5794 17547 3416 5791 8190 28195 8560 17561 12788 32539 29909 32540 18297 7463 3472 25101 867 10177 32541 32542 9932 19767 32543 826 25117 32544 20822 32545 32546 32547 32548 32549 32550 24606
494 29793 13203 32551 6328 24371 24374 29785 29611 9597 32552 32553 27131 29808 21667 11907 32554 2156 32555 13723 11891 9717 3049 1174 26192 12630 9951 17619 17955 9966 9911 32556 32557 32558 32559 32560 32561 10958 9964 14053 2307 32445 32562 23036 27012 32563 9823 9859 9898 9941 10744 24649 9004 32564 10660 32565 32399 32566 32567 14499 23037
495 10756 1927 5944 26473 1006 10146 732 1915 24046 2031 11353 32568 11983 7780 30813 7269 8863 4585 4584 10163 27030 27993 9173 11637 2271 1031 22986 28667 32569 993 23036 32570 21621 23254 10241 11681 2388 679 2237 2317 4815 5302 23226 4610 7167 6805 6488 2407 7170 5552 4647 2371 6126 220 1434 1792 32571 26902 5081 2356 4653 1814 10247 5713 28671 11414 8952 32572 5734 3222 32573 794 32574 32575 5733 9997 32576 3313 24058 31896 1174 1176 24202 32577 23420 7363 1835 31802 3370 5145 822 26608 12675 12786 32578 28681 13153 32579 12637 10268 32580 4498 32581 32582 11312 5309 32583 32584 5436 7243 647 8315 23697
496 8866 21684 6808 11938 12423 10770 24290 12852 12854 5704 8591 5708 12430 24285 6809 8249 25162 8248 21686 32585 1986 9574 32586 1900 24374 21687 25417 32587 1881 27118 32433 22998 6535 24243 32588 32589 2148 27284 2123 424 24275 22035 24255 24344 24289 27122 32590 21696 32591 21697 21752
497 12091 32592 32593 5985 5617 1486 23127 11891 11948 32594 379 23123 23036 23126 13097 1389
498 5353 32595 11017 21525 16191 15388 3388 32596 27946 8868 8563 32597 18209 8165 9914 17425 32598 19921
499 1309 5934 7798 27732 32599 7805 1907 10996 9974 25551 25582 13227 13504 6088 25744 13 3579
500 9562 28766 8633 7607 21768 32600 13284 9094 15932 7573 32601 27933 27979 25289 10427 32602 21777 24964 32603 25529
501 11635 10155 1009 32604 1410 3045 31618 5495 746 1916 4598 30731 5508 8302 5522 2314 7261 30046 750 11673 12764
502 5352 5319 5944 10689 32605 1925 25063 554 121 9356 7168 1100 5498 2005 22972 32606 8343 8438 29019 32607 30721 1601 7261 29878 27027 23192 7269 4925 11352 179 12230 9590 4938 2119 32608 8371 6653 168 23221 11680 2635 4587 223 9658 3067 27993 11666 11376 7854 4976 32609 11361 11306 13860 2240 623 9687 2218 10712 32213 23241 27544 14030 1676 7303 32610 11369 23780 2271 14177 2238 5530 749 12236 31254 6348 1582 5006 5566 254 32611 2122 5332 5712 5298 2267 11371 32612 12244 12248 22344 5316 32613 13542 11383 7174 5535 2723 11384 11390 7164 11385 11386 2423 11382 23290 5313 7652 5559 7165 32484 5314 23279 310 28665 2371 32271 2524 26822 7771 7163 32614 14773 2540 23117 22140 13087 32289 9396 2814 2753 12252 29061 2831 7772 11422 2936 2840 32254 29063 355 30074 4942 23329
503 54 1537 6692 566 25045 10460 1412 6624 5663 26084 8490 31020 7037 310 32615 355 453 463 11414 787 8952 794 11785 9221 9218 11322 8560 32616 8189 27568 11757 11798 21588 3785 462 25509 31678 32617 12698 3669 32581 32618 8491 546 22162 32619 32620 27073 14214 7948 32392 32621 26213 32622 32623 32624 1676 1683 32570 27034 8420 4956 1425 1368
[truncated: 13,725,803 more chars]
