# Supplementary material for: Research on Recommendation Algorithm of Joint Light Graph Convolution Network and DropEdge
Source: Hindawi journal article supplement (doi:10.1155/2022/3843021), 2022-01-27
Supplement: f1 [file 3843021.f1.zip › 3843021.f1/gowalla-test.txt]

0 7580 3730 5983 5990 7608 1213 6017 7510 7513 8343 6006 8197 1217 6011 10970 6020 18632 7595 5963 5962 6018 5964 10976 4664 20154 8360 5979 7500 6010 1215 3191 1538
1 31613 34341 36414 36721 16213 19928 37961 38230 22103 22105 19926 19927 2525
2 1526 1513 1686 1500 35515 26752 2179 2174 2549 3797 1325 3634 1237 1695 1632 1238 1262 2624 1636 11182 11185 5693
3 32189 8437 5178 5179 6451 32807
4 5284 14418 26420 6988 28644
5 189 792 11355 2315 16498 186 29273 1437 1436 2317 187 40042 8622 5770 14204 4587 6041 917 1933 1962 11149 677 1910 3122 1816 17898 9364 6647 197 3053 3099 2483 1399 32614 198 33535 194 8700 22352 35448 805 27356 11357 13907 156 2525 559 37625 20983 14961 14779 20248 1207 6579 11169 1428 767 766 8741 14220 1831 11383 3107 31368 1421 25844 8890 2319 7844 1795
6 6668 1776 529 6444 470 1096 1761
7 880 3873 8537 669 4105 32191 19477 4083 4082 2958 3843 1933 15358
8 28093 16028 3955 1709 4053 13584 7897 6687 7900 7902 7899 35863 25736 25370 2935 1772 10417 1843 10418 11515 1762 4082 1730 944 574 2281 9332 36256 3252 14696 24603 13166 19504 10607 14607 3195 2944 7936 1964 3956 2938 3250 2387 2525 27801 30347 1755 3914 609 566 16552 26044 14609 20051 991 1712 2278 18700 22252 1974 15251 14788 2926 585 3349 23286 1986 4344 2924 10040 11513 11094 3293 564 2956 4024 3120 2409
9 10032 6685 3014 18347 1925 20219 11773 25873 1758 3298 2525 7755 1652 1650 10029 628 699 6507 2986 25370 2786 37507 37508 9316 12852 2954 1843 8148 3141 2637 6751 4410 11536 4111 6750 3242 20901 1755 12587 4030 2527 9314 18419 20228 32296 3000 2965 18042 28479 15078 25369 25364 10031 9296 23246 6684 11605 7458 15077 14771 2387 16938 19867 9471
10 1634 3751 2478 2463 2554 5693 215 2595 2616 2642 1352 4294 17326 13690 15600 6223 9702 8213 2620 29656 6253 2174 222 2633 5621 1609 3812 12622 37314 17108 17111 35046 2180 1636 3538 18262 6233 160 38368 1492 32310 1537 51 15389 2607 2489 21430 3456 2481 6329 1632 3638 5696 5692 22066 2624 227 1625 4601 17603 8970 6232 3699
11 6324 2431 1321 213 6323 12097 2224 23946 5322 1307 1244 14838 29119 1695 5787 5315 326 17807 160 5323 5785 336 5783 7443 30372 422 380 2228 6422 379 2192 26814 415 16465 5683 1625 2633 4432 3510 5842 19587 3521 4442 12098 18152
12 0 1215 7531
13 2067 7348 12528 2220 3044 3071 3019 6803 4602 1436 2071 19348 3268 3087 20837 16986 3072 13682 3081 334 2460 38174 5172 12438 283 559 3768 3032 3077 780 16988 10800 10390 6936 309 14252 2318 623 2895 2545 14235 3133 2324 2467 774 1437 7356 3034 23734 28954 2347 2903 198 15522 3021
14 4546 18264 20960 15935 2565 12206 141 6112 15950 28387 1252 2541 2195 2193 14156 1361 10294 6252 1152 14838 160 20969 2225 2192 18918 6901 1241 4385 9257
15 7897 6687 1076 16606 2036 6146 1441 5386 6022 2319 197 4462 16392 39928 294 374 205 3087 17051 309 6613 2323 5015 559 2525 3128 4708 2284 30853 12566 29289 4812 3307 3396 9441 580 2350 3991 3912 2398 30193 3871 2366 2387 8127 6520 4018 877 10517 18410 7478 33349 39258 30984 22226 12056 12033 34506 12054 7623 7624 7620
16 6606 2358 8186 16512 4523 9963 10242 1424 10241 193 4456 789 10240 8185 3464 812 2482 2906 6133 5619 6129 6132 6130 6131 29228 11781 1778 12378 8187 3266 176 7199 4608 18916 34114 31872 16513 369 141 15338 7103 12176 26037 7988 29133 37083 16908 9310 32194 14999 16909 18630 16911 8964 9211 16910 1355 831 9213 7209 1356 13301 4434 15337 9212 828 8966 8968 9215 2925 3845 5058 1821 937 14700 15110 11763 12031 15235 2337 2525 628 5135 4029 821 837 822 9223 6057 38978 835 16903 38456 3822 4087
17 36637 18844 28373 10678
18 2631 5357 1675 18269 1241 9688 31457 22276 23242 25965 9134 1244 5347 31270 9500 5355 29124 2633 16793 6252 1452
19 14815 11380 1464 9639 201 205 2971 14403 10818 7341 11875 3012 8095 186 17189 7398 6611 529 1479 4519 3092 6558 478 2473 13306 3105 1417 6594 19775 2466 559 8592 33376 329 31368 5410 3059 6579 5012 7394 3096 35008 3031 2483 3739 1437 17190 3107 40974
20 16446 4117 1864 36381 953 13447 3349 13208 2281 9441 10602 1897 1874 2924 654 12567 25366 13955 12537 12211 3991 2970 1772 11715 894 3132 3559 13164 31965 9474 9344 13935 1910 8014 40474
21 1237 8209 5679 1300 2617 5660 1636 6213 1229 40798 5695 3692 5700 7081 2633 2580 39066 19340 30065 1321 11373 5776 8297 2241 13907 447 1831 2616 6098 2595 397 300 194 176 1441 4646 5421 21019 5626 2624
22 9553 27123 1195 1307 36214 1302 4669 17253 11159 4670
23 1965 13208 1105 20573 29677 2965 14456
24 5131 1311 14833 8571 1268 25999 8556 39835 1508 14831 7120 8554 24591 1278 19481 1537 8095 160 1224 6111 8882 8163 23958 3694 37628 2462 1697 1197 40063 1180 8898 35105 6704 35735 1321 1158 14839 6240 6250 15951 1186 2451 37322 34978 15498 36040 7089 1128 3655 6176 1127
25 2962 1843 20213 15093 8252 3263 20222 3559 12200 1101 3121 559 1207 2525 1709 2942 7894 16782 571 600
26 12733 15872 5751 7288 19859 34776 7193 2341 37645 25448 25449 15143 36038 25447 28095 28097 28096 34803 25450 17589 20481 19843 3249 13253 13225 14789 30968 2337 30961 4561 7218 7219 21667 7222 7217 28957 7220 7221 7216 7212 7224 6837 17831 34510 2635 1086 543 542 598 1074 9471 12084 29161 5750 642 7125 5744 5752 14375 5085 13920 4341 12290 5740 32138 17598 5095 17596 30635 12611 19860 5104 5110 18340 7613 13757
27 8331 1965 1893 2395 632 653 893 2283 1969 14603 15093 3846 3933 5685 6081 29933 1534 1314 4131 34486 3320 2040
28 997 4193 3116 18483 1837 2929 10030 1051 8128 6423 19371 6076 1536 1538 2525 4094 1772 3397 3366 2527 1072 2939 22022
29 722 7120 1513 1547 12617 6933 19746 7365 12134 28633 7384 5422 32278 620 10377 5006 3768 10394 31368 4519 1430 6609 10797 39142 8299 718 18104 13938 35001 35008 309 16891 3787 3737 6362 40270 25898 23064 2903 10378 529
30 6715 5320 3514
31 611 4096 33350 13839 2525 3533 1104 1709 2938 1708 2965 3332 4077 2415 1762 2383 8337 692
32 7575 14393 7667 28926 7573 7788 7652 17761 6037 7717 7653 17967 39119
33 19868 23823 7793 2525 594 693 9320 1725 4024 1722 8252 18892 39105 14861 4705 4901 670 16036 1755 11556 1843 1811 6038 1970 15476 15513 2365 707 1728 887 11714 1726
34 40598 26179 37602 517 161 1169 30649 15404 14755 11851 30650
35 13217 847 6847 945 3252 8509 27382 17079 17341 12627 1500 8554 5946 722 2525 13437 15681 1739 10872 1085 7638 14775 9472 958 36849 1029 1938 991 3197 3849 992
36 30659 3533 1033 598 8269 15245 23834 3196 1937 990
37 2030 3252 2405 142 6042 2525 25867 34496 14529 1023 22093 14806 642 38313 13870
38 9028 9024 6548 9066 4477 4481 129 3778 9054 4432 22328 14479 4430 160 9010 8044 6170 6182 7553 6256 7566 6550 8812 5151 40120 9064 5063 6316 1204 9123 40938 127 36545 128 28433 28542
39 36942 11624 16834
40 13033 8119 17637 20899 28759 3189 3190 35969 37730 1169 24010 10524 851 14798 849 17262 13272 1609 4289 37403 32508 17167 12255 2337 837 32193
41 4791 4764 20148 31570
42 21023 2421 5693 2624 4552 9500 2554 6229 22072 2574 6099 1636 38271 1258 21306 2616 5670 6111 1302 1288 1182 1413 28438 1127 6184 6172 6182 6179 6181 6170 6180 1128 1131 1252 2418 37972 1199 5669 160 13075 23049 3549 9778 4974 3554 5226 718
43 238 6224 8888 1225 1260 8258 2503 223 1237 5696 3689 6223 6226 1644 2498 7123 2597 38903 2179 1262 3110 18195 2541 1321 3072 1610 176 9638 479 9528 2315 12130 1632 2463 1695 1453 2624 6098 11156 216 1288 6264 529 12308 302 12540 2508
44 8486 17142 5430 12729 250 30116 13279 13291 35879
45 10415 3592 10416 18006 14634 8122 17652 876 3593 469 18529 1954 1956 13845 17878 12583 25398 11657 7956 30867 12597 755 973 155 14472 1000 998 3004 1003 972 16018 14474 14475 1002 1001 1995 14470 14715 9908 27194 1006 1004 1007 16448 283 15673 1317 1005 11650 3271 10689 6407 24331 29218 23161 9166 29213 9164 9165 29634 20575 28905 6406 29212 29554 3724 3722 22032 3723 32932 24328 3726 22034 37975 20632 30411 17797 29085 3727 3725 32936 16081 9904 7408 1009 2051 4401 2525 3207 17431 2369 3195 9288 27024 11541 713 1755 11511 730 17514 2639 464 3198 3197 3199 2396 894 7744 989 8137 654 1771 1841 12760 1069 736 727 3372 1933 6042 9924 1816 12582 12865 15497 12759 9734 4231 35206 466 874 40234 12832 10013 35205 12214 12747 728 647 18678 16606 14780 2387 19748 628 18350 8306 13182 12884 5059 31692 4349 10419 7936 1067 4784 9733 1966 12756 543 29110 2970 10420 14734 542
46 23570 2635 4545 9264 6488 13472 1072 17610 3956 1078 39353 13501 18773 15765 945 10031 39609 2993 2525 18702 8914 40704 12340 692 964
47 4261 274 18798 32171
48 35851 39015 31436 26787 239 10814 23087 17045 16226 242 4244 32501 7307 26780 8990 13576 11862 36271 40256 32761 7318 30397 7435 33971 7776 16225 6840 18880
49 2752 2780 7171 32428
50 3137 3105 559 1918 15682 12415 2492 15696 2972 5112
51 2660 9391 1242 3643 6265 4548 2261 3687 22079 2426 23444 5634 1183 1231 1263 36214 12673 8821 1203 2514 2525 483 5670 160 22066 14489 7073 40257 1307 4917 5578 8633 18641 35619 3638 5614 1630 33035
52 26584 29089 14654
53 674 7946 4055 2525 2493 160 32635 5060 326 222 216 3113 27727 367 9072 28405 5815 2624 14484 2297 333 5814 14486 37956 7408 17542 4430 2337
54 3493 7105 9153 3501 3447
55 28379 33989 2364 37204 6191 7443 1636 2523 1111 6901 3695 2489 2174 2516 1246 3715 2612 5692 2453 1302 1352 2220 1314 35046 2933 6079 17223 1684 13386 1683 12655 1537 2971 11156 5676 11032 2507 1128 1237 2478 2183 2180
56 25470 25462 35660 642 2341
57 1584 8771 9393 13128 37516 13314 37863
58 555 5430 1504 7120 17117 17144 32457 14318 1513 39822 35869 5429 559 8612 3078 3092 4289 5287 3409 17429 15148 4361 8978 19727 722 2155 198 200 3420 797 205 620 1471 17017 23734 4519 3770 187 4656 2306
59 2474 6618 15923 1428 189 8789 2319 18818 8906 283
60 9407 38095 17254 29422
61 1217 39363 9793
62 8931 15799 10636 8133 43 16701 8906
63 14965 7816 36941 21443 10860 5607 22872 28560 37217 12110 5056 40112 16667 16878 5025 20190 23315 12111 16869 6776 16876 40674 16235 16655 36469 29720 5053 9966 5047 31647 12108 15335 16866 3398 28610 16951 20914 15001 5019 14992 20711 36549 14964 7859 32406 5017 8420 8419 8421 5042 16860 6771 33793 7987 14637 17226 26510 26271 14636 21444 6760 12122 12112 16641 20110 17519 3154 21279 35431 3607 40965 3617 6756 16874 10859 12415 15000 10868 18288
64 9778 18461 18459 5258 5265 5259 5257 5260 5263 5261 5262 5264 19253 5079 18462 18458 5030 5256 19173
65 22858 11837 8831 17084 275 5452 20046 4276 40181
66 15991 3024 25844 17912 2903 17016 5616 2451 3070
67 296 4602 194
68 4793 16664 31246 4869 6770 10871 35122 12109 16862 4870 12108 16866 4738 38362 15333
69 2492 9730 692
70 5842 6347 416 14494 6429 422 1417 31983 39122 4499 7561
71 15115 1076 16673 1077 1933 468 16242 571 2525 155 972 642 17441 18592 33745 26283 4409 17781
72 2057 2635 192 8924
73 202 209 293 373 792 553 302 31262
74 32014 1513 8832 8385 258 257 17296 256 13509 1526 17122 17355 20978 14833 17356 9468 7118 17120 37225 8024 27345 8569 13277 13496 1236 11827 36379 274 7431
75 4177 4083 28140 9428
76 34804 17165 6012 7606 40476
77 16056 11612 16055 8169 16054 16047 2650 2651 2652 1015 11720 2654 11721 16045 2655 16046 2653 18498 23424 16990 18508 26424 1020 18503 12523 3577 27149 31366 30778 17748
78 9705 26812 9568 8899
79 378 6347 394 426 436 6880 3628 14489 9161 2161 6566 128 5793 1349 9143 1292 3626 326 34209 3112 343 422 363
80 16269 16270 7628 19099
81 23046 23054 23055 11989 16978
82 14955 31456 4598 6902 8043 27442 6105
83 17295 27389 17094 11745
84 4272 7427 12932 1538 559 837 28457 9309 2015 30117 2353 7387 13682 39928 25516 21066 2071 6933 2467 305 440 7396 1553 4519 15372 3472 1562 4624 2464 529 194 8592 8155 4656 403 1437 1601
85 4419 19424 19428 11818 10130 22856 10792 18230 20769 10547 10159 10551 11823 11400 13645 10947 10123 18058 35667 4986 18458 5226 9778 5227 20139 3552 4976 718 11249 10575 18827 11666 10150 30543 10904 10128 160 3154 1811 2203 11245
86 14592 27154 2662 6040
87 9935 6717
88 15111 4740 17687 30196 4888 27687 20196 15112 20221 1767 34499 20872
89 978 160 1287 19779 2505 1243 6223 6232 40309 4538 6224 31452 28490 26014 3797 810 15896 12558 33578 2359 6610 3099 1831 9528 1183 221 129 179 1198 1224 5290 1636 2616 128 2622 3696 30888 180 40436 2595 21030 6098 1795 6372 8699 3094 16984 4577 2623 2526 621 194 176 4646 5421 3420 1262 19340 1240 30847 8287 1263 2624
90 19805 17821 7145 15872 19802 34809 7290 18340 18339 29288 33053 5112 33804
91 1362 4505 9133 9155 18166 8286 3628 9196 4452 6422 336 1339 341 391 1406 434 14501 10810 3439 5067 4367 30403 34595 34593 26575 34256 183 213 5315 6263 4354 6527 377 9076 13524 19565 433 4359 12172 12297 31879 16525 2551 3626 3627 6271 30402 14500 9145 11879 14487 14481 5071 14491 28417 4358 4449 28419 128
92 26766 18363 14081 37400 34946 27409 26770 14086 35146 9417 35439 17240 14888 14092 14091 27411 16218 14892 4529 7403 7402 14095 17971 1811 978 26773 27364 9418 33955 35601 19301 9416 14067 18383 13095 37699 32508 34869 18372 21647 36624 13260 2444 28847 14054 11883
93 17189 557 1795 310 7516 123 8105 8092 31631 29993 19727 978 3191 126 84 7596 106 101 7510 23621 108 7504 10987 7513 4661 7538 7595 121 15289 8360 21639
94 542 878 11770 15110 17492 954 34263 34243 19483 2635 2972 718 11890
95 828 835 1354 15535
96 15618 15616 15018 15617 15615 35288 15611
97 1504 8439 17275 3414 13690 15161
98 992 3954 2971
99 1262 222 1150 21029 128 237 216 1240 7092 2642 5693 1149 2478 1691 22070 6919 1702 1200 2506
100 4974 35661 5256 17193
101 31868 559 2567 16505 38006 30088 34474 3764 14274 38638 4610 10401 12271
102 3663 6878 1197 1192 1201 6885 27441 7092 14823 30065 19346 28036 2193 6731 1128 6184 6729
103 2489 8877 8882 28379 31496 1808 2544 22072 3704 20959 20000 2611 1287 33240 13349 7911 39506 12727 51 6455 160 6169 2517 2515 22053 2616 23944 178 1302 39338 2626 2503 1115 7073 7105 15368 35247 2624 35232 2627 2555 1126 1131 3711 1128 39627 6170 1111 2507 39934 3796 2519 1195 11137
104 37781 19983 33830 6201 29655 1639 1347 32927 28406 17603 2627 2541 2501 33849 3480 6165 6166 4394 8818 3528 3489 8812 1202 37791 1204 8160 6715 9059 37787 20010 18169 9499 421 428 337 422 388 6167 7114 2228 39794 20014 2599 12661 10669 20016 127 8816 9118 1625 4534 1109 1110 180 37952 5672 1322 1636 11151 35860 20100 12666 6157 3709
105 9609 10250 6561 37460 24777 10261 12322 6573 2242 38118 9621 38562 558 35008 35001 35006 39899 765 773
106 5848 31785 28417 28418 18931 363 1500 1498 32000 12478 19687 5131 1537 30521 642
107 21025 1262 11032 1636 1199 39928 757 805 8879 6225 6223 7079 2319 6239
108 28737 4593 14505
109 668 1061 23246 7458 14442 3397 4231 12264 34736 666 12891 6839 1735 2348 4233 1866 9471 1838 40879 1973 4430 13411 2635 21301 25361 2525 3154
110 2525 559 800 302 189 1601 3070 6023 779 8593 297 1794 187 6831 632
111 39828 13898 8794 2144 32908 4453 3476 1370 1375 6883 18148 332 5576 6388 7388 6962 9636 10341 1796 11153 194 301 766 6703 4841 14207 1594 10280 534 620 2256 6398 6412 4162 2635 18143 27822 559 24769 9818 6392 33376 24777 11162 6930 11693 2324 2066 4375 11717 36633 2310 197 6701 1553 13154 9615 12322 204 546 4519 8783 13134 176 31023 10350 19622 2242 2345 33532 8890 3040 2261 1321 1428 38110 547 5774 31368 39335 8051 1601 18144 40048 356 35002 35001 35004 34998 35008 35000 35006 38562 309 40060 10250 3099 14177 529 9528 440 6393 524 9637 2319 1831 1795
112 1708 14595 15391
113 11480 7936 1046 14614 1708 11771 12006 10035 2387 654 1821 714 20876 3909 12200 937 1933 19489 4900 936 1758 31518 669 870
114 6175 6176 3655 3645 6174 39631 3644 6170 3635 3646 6177 3657 39624 6179 6178 39629 40824 39633
115 24017 7832 1650 3810
116 1930 580 1708 628 3936 2944 12590 12987 653
117 13433 16881 16882 40135 33977
118 4830 31236 36853 33795 34831 36246 32878 3607 9903 14011 34294 23998 30864 13817 25808 2337 19741
119 205 621 559 1811 7713
120 194 34666 19837 5887 297 1792 3226 800 307 559 15521 283 35975 11854 25978 35606 11921 11856 28081 17803 31755 32753 30877 7472 3261 38103 38364 32610 10496 17804 11647 718 10694 8183 11855 38007 32460
121 2281 4123 1045 6518 3359 2944 3849 2970 476 2964 24787 473 3948 750 3131 2382 1815 2033 2525 821 16364 9300 3901 8252 3152
122 3703 8179 1636 8882 15959 18221 15941 12417 1705 14955 1638 1287 978 4207 5550 160 2191 1197 28331 20973 12424 5324 7443 5677 2207 2229 128 129 14489
123 35257 6589 6599 558 557 6616 2253 805 2134 292 2461 34663 3097
124 19005 39852 32394 35561 30461 19106 25867 19105 19113 19114 19117 17498 12340 978 25212 10812 2432 283 559 19067 197 204 34654 2319 208 1438 1795
125 17321 32103 17320 15912 10610 15486 9662 35462 2830 13781 16281 35899 25880 26585 4436 23328 32106 17318 16404 22335 3402 4430 2635 559 540 801
126 8213 14840 2624 1257 216 2477 16167 19611 1239 2489 6247 6197 2177 11121 6222 2579 6442 1183 8258 39095 6224 223
127 28489 29124 1609 9501 9515 34128 1407 335 21023 1352 26816 18319 15437 9082 1537 3697 8266 8163 16165 212 6026 8198 160 14587
128 14358 38426 32041 14376 26266 32369 6835 12893 2850 7473 1860 3615 16246 23948 642 17589 33980 12612 17821 13868 19560 17820 29920 19029 36978 14366 2724 34678 5750 5754 19557 15872 2712 13643 14368 21240 19500 19829 33786 18482 39297 14745 31488 16040 19503 19434 40645 19432 17787 15877 2773 16254 2695 38882 17846 17453 3127 32037 2813 35844 9184 34677 34034 2880 33787 17777 17860 37529 12733 17818 25959 14351 2881 3125 19851 17842
129 9578 5438 5439 7427 5340 40247 40495 38019 4271 39332 269 37726 270
130 8719 6818 8720 19545
131 6595 194 3765 2097 5619 3071 4641 11113 2289 192 9370 10271 10266 10351 13682 792 187 4998 20022 3093 5004 6135 4630 16498 1613 13827 6930 15022 6445 445 403 3025 4519 4646 2061
132 10808 129 128 14062 14071 2662
133 263 264 271 272 270 268 11011 267 269 273 9582 4294 11009 11012 15973 32168
134 15970 1691 2554 129 2624 5676 1263
135 34505 1952 1714 1654 20141 2337
136 31558 283 3615 1811 9531 6009 8266 18977 718 160 20566
137 1674 2592 1646 2599 8278 7104
138 8361 8108 5985 25987 5966 1459 25980 11056 36369 5990 106 7585 10979 6002 11054 5991 6006 9793 563 54 15289 3219 12079 7607 23625 8107 35293 6010 6007 8365 6008 7595 8092 7599 16212 15290 16209 8360 3744 8376
139 3517 7100 20694 2363 2221 9028 4487 34262 1226 31384 1640 160 9013 5151 4475 6275 9118 1205 3507 3716 36094 3709 19998
140 5030 4939 5440 5343 5344 19542 3549 3551 4946 5079 84 97 1213 19388 11056 118 5991 6423 12438 978 11054
141 838 2525 7848 16567 30085 21727 12570 33983 19083 36382 26570 5107 642 16268 16315 26863
142 3178 5430 1493 1314 1500 1492 3820 15729 4994 8388 1502 1277 1537 3165 33876 21796 29433 7832 3143 14393 16324 19155 12227 29115 4910 36736 2337 31672 3147 17966 14522 3148 17776 3163 3151 37142 5344 5079 3549 4946 2971 33743 4294 15019 1538 1811 16181
143 7932 2432 7739 17811 7921 1537 1500 17585 5174 1463 17120 5180 40770 3800 1811 9786 32640 19158 33042
144 21277 21278 33445 35087 35089 32667 33447 35088 34684 17959 16371 37997 39241 7907 33986 29284 182 32666 25505 16815 40710 25504 2337 837 1996 17169 40606
145 51 598 14701 18287 1743 2525 2493 14529 27189 14586 14535
146 8239 642 17585 5174 1463 17120 15064 40770 8502 20378 1537 4221 18720 1538 34605 6104 10689 8095 9754 9786 33042 718 1811 19158
147 2041 15029 1987 30639 4153 745 571 10434 1762 566 2405 20050 13406 3958
148 11110 14774 24021 847
149 15555 11182 11187 11192
150 20795 32638 10290 34816 13617
151 22270 4785 17679 7906
152 8911 32116 38687 37489 30125 31936
153 4139 2042 8274
154 35227 5617 410 5703
155 12629 17096 32310 34483
156 36422 1156 26819 36561 3518 1642
157 8806 17893 8668 8667 18438 8774 13915 2673 22279 35113
158 12079 6010 109 1215 8379 563 36678 114 7606 7601 77 6015 5972 10802 70 6012 7600 7538 73 62 16210 7498 15289 107 6019 7526 21639 8360
159 23577 2829 38013 642 16350 3308 18698 10630 1903 19485 2404 21423 5128 2337 1104 2525 29619 31 32466 13021 6839
160 2484 1421 192 3471 3266 1792 195 2482 16075 3472 6588 27776 3267 2472 34042 1428 1321 7086 7083 2507 18277 3715 3699 18268 3479 21025 2478 20835 3750 184 7087 7123 35234 9561 2241 205 40270 5452
161 7016 9952
162 28574 3744 6012
163 18261 2557 2616 19340 5701 31601 223 237 1242 1199 3392 6525 7458 5610 32904 1182 7081 7076 5705 1211 219 5696 1631 19326 5675 4596 20957 1236 1183 11121 5695 6185 5351 5678 11151 19347 1134 837 822 17516 828 5284 1023 1690 4527 2624 15435 128 1263 6360 15104 29128 37154 2929 28607 1743 2525 5172 160 8992 216 3643
164 13333 17189 6752 20145 36054 29684 12503 5172 39528
165 308 2318 2248 4498 6593
166 16892 27912 5172
167 155 6108 1264 16836 11485 1076 3881 15221 37309 1875 35221 1959 1711 1754 1933 1863 821 8132 31 10660 8013 15770 8906 917 12967 744 16885 1003 1996 34303 9793 837 2525 714 27023 10050
168 129 128 6254
169 1843 1988 10414 877 30625 933 3313 673 674 2525 141 10987 4674 4673 10956 126 7506 16817 718 6121 4946 563
170 23820 27345 5180 17120 13277 8024 37225 3583 16956 31964 7116 17118 17082 1493 15730 14829 3410 3810 14322 17834 32374 35869 12656 6737 4995 36368 31258 30096 26536 37151 27421 17354 13497 8836 17344 15014 17343 17345 17217 12480 17387 17388 5370 12479 17280 18446 14317 27401 15757 31968 2337 30620 14807 12501 5948 2649 14329 40770 17173 8832 5861 31980 28987 34615 13514 1521 17123 12488 35629 37360 32810 7120 13506 17207 13507 5186 2648
171 28855 19405 38442 356 353 6703 355 362 354 359 13874 17001 6560 19057 39227 15916 4498 529 10341 39226 2345 31025 6625 13135 8046 17018 20390 15418 37521 13828 1594 35873 24767 10299 12269 17047 16101 39230 2067 3050 40725 5410 38120 33948 14299 2263 14163 11123 10339 14168 14217 13862 14167 12128 19373 29240 12129 13833 12544 9895 11380 12149 36221 23786 1601 3073 7364 438 3093 479 33528 2071 19384 33529 24756 20836 4579 13320 31922 30297 30288 17005 12281 35108 37842 12180 14776 12274 30712 34651 9492 6385 309 6204 13915 13142 4519 31368 3092 35379 24343 12143 4575 4565 3732 18545 32381 4582 35001 35008 2510 9650 31032 34998 35002 35000 35004 35006 38562 31757 17893 12295 17895 31926 2319 9386 34043 10327 37863 6936 524 6605 6603 2323 14215 2526 10471 3033 12325 10236 11711 35380 12282 8051 6559 190
172 7335 248 14409 11837 11784
173 29929 1684 39535 21067 1683 1280 14691
174 26606 34279 37884 34425 26371
175 19007 30463 30698
176 4477 1636 29653 3778 2463 1182 17178 2595 1212 31784 28542 6113 2454 9029 18262 1287 1264 32182 13119 34570 1537 160 15389 6247 1307 2541 20991 1250 1294 1148 1623 4596 2504 2601 184 2554 3715 37628 1632 2633 3501 1122
177 18816 21 31 37 32734 35513 16704 15808 29207 48 11 22245 10626 16708 16678 15445 3601 17617 36630 33749 8133 1500 8149
178 11732 6442 2627 2623 25414 2622 8279 2418 2430 160
179 11693 2319 4519
180 8284 5693 18305 31970 8219 26934 1168 8286 2205 18261 327 7446 7086 31601 160 2579 1236 33635 1313 1537 7081 184 34206 1023 11121 19347 5351 5678 4596 1127 5284 16990 2556 22073 2541 16167 2974 15435 2525
181 11328 11965 11346 15285 15290 15286 11330
182 19982 3508 9128 6319 3488 127 4590 6316 28433 3511 7566 6548 15938 31982 1455 3517 15939 19563 3435 5314 5063 6275 6554 4476 8812 6547 19567 8817 3482 1204 6549 18154 18168 3453 9152 1205 4365 1368 1417 8808 8807 8809 8811 8810 1365 2319 37786 1292 7557 3441 6553 5062 3497 2597 8818 4477 37793 37718 6318 30539 18167 3509 4475 3478 8819 35966 458 6712 4598 7416 7417 16099 805 324 192 306 316 6372 3019 129 20002 8160 3477 4499 28409 1294
183 7148 28959
184 3539 5320 21056 160 33885 3734 22709 3758 9841 23486 24752 11652 9687 6896 20323 1207 11161 20906 11172 8062 13526 6425 336 5798 11028 363 5796 380 6347 378 6196 17177 3500 7377 2522 15937 1609 6047 12519 1023 9063 3494 9066
185 16412 37000 12810 822 23848 829 28399 15337 33049 33559 17041 8367 832 4434 18589 2018 17516 20671 1355
186 38797 18264 1451 20988 36775 2740 32137 32136 26283 14883 642 160 22043 6901 8980 15953
187 8320 27759 1961 931 10031 15676 37606 1039 19086 9457 12763 10015 2534 12225 10009 1061 2386 2390 1870 2923 12560 921 958 2789 15256 6495 9471 3120 1918 642 3125 2712 2692 2740 2773 2744 19029 2736 2525 838 2964 2367 14514 1829 600 3879 3367 3297 154 18698 7951 13164 2278 4005 566 819 9432 9679 7055 17546 2965 22005 991 2337 14041 7647 33073 14031 17686 7642 36105 8325 13955 283 2376
188 11796 18531 8828 201
189 2315 28224 34939 1469 11711 8628 1563 6385 11382 8782 529 7372 21039 3759 13150 6605 8620 17189 8063 6963 13160 3090 14256 9874 32551 397 24776 2247 774 10227 205 3099 1582 1568 8689 12554 8599 3059 1573 16519 2310 40974 6644
190 4658 29422 11158 11159 9531 4670 31808
191 1501 1685 1926 22052
192 16202 16204
193 3475 6446 6207 307 324 300 3080 2123 3136 559 1811 3942 1899 1708 1756 600 10412 51 1609 3815 1023 2525 31519 598
194 8127 1870 16191 15391 1811 2525 19466 3383 2396 579 3382 28427 23570 3853 3392 1739 15732 473 3894
195 21304 6291 2261 4375 2599 5313 3774 2319 1352 8266 18505 14423 2570 11442
196 160 1212 35234 9012
197 29082 27121 14649 8266 718 36803 35927 2673 160 5194 9553 18820 14744
198 40079 11011 7321 19722 38899 34231 23166 20089 32675 30296 23133 981 29122 10685 29123 10686 38367 20806 8095 21390 40333
199 28683 40487 22875 25112 40931
200 9827 6638 194 176 8890 4629 6642 2266 9829 9830 39197 8295 1430 24786 765 6398 478 8624 9375 34624 1831 2483 2460 6396 11704 3075 2310 10797 372 13669 27359 3024 3096 307 3420 2307 27815 3044
201 17525 15725 40825 31828 7070 17538 7017 9463 13414 7018
202 4451 6926 35451 2553 5293 16793 1692 9134 18611 1178 18242 20567 19996 29647 1185 391 31843 1244 20985 1406 340 31458 1128 6170 1452 11227 4616
203 370 6207 1428 559 1082 6479 10017 2972 23794 14394 628 10019 1265 30615 28651 4231 1061 3317 22022 19482 3352 10031 560 4202 1538
204 20485 7592 12230 17504 18473 10461 17793 3177 39966 18607 11865 10467 7728 10466 12088 1609 4294 32773 2220 1811 16205 7734 26518 10463 12247 12237 30832 10460 16076 7782 12253 12229 12092 16200 25950 10459 7702 13148 10465 10468
205 5772 8890 8295 1430 478 6398 8624 34624 1831 2483 6380 2460 2323 6396 13158 9639 11704 3075 27359 23776 2310 372 9648 27820 3024 3096 301 34362 39993 307 3420 27815 9348 34216 3044 13669 3078 13322
206 4933 18096 5452 15505
207 3019 5211 27609 13626 22698 7974 28122 3781 32333 21032 36587 19767 2364 1811 4572 18644 3758 39424 3757 20384 38351 13631 31462 3231 4294 11655 40918 17764 40919 7209 36827 837 2525 283 11665
208 12535 4131 1853 571 2385 1843 1821 2924 870 25370 2032 628 4117 17287 1925 2525 2382 1762 3316 7458
209 9293 14142 981 642 21461 29437 37160 8801 774 2622 11115 4453 6372 16491 2510 2526
210 306 2123 6825 794 13414 20113 13780 9664 1858 1749 13166 16027 13571 35250 8329 13572
211 29279 16664 39072 7859 4785 3607 11793 5023
212 10582 10928 10547 10199
213 2688 17766 2712
214 1076 1077 929 20222 661 3262 3357 15270 1061 9723 561 19749 6459 16118 19051 7458 951 2493 32273 19084 666 564 1038 722 1551 20551 978 2365 3854 560 35205 40233 1085 1928 1082 884 9716 1084 728 1100 3367 3385
215 7965 11751 14614 594 8266 20871 2400 34834 24014 11513 3901
216 22015 1493 1500 8388 13363 30520 7120 256 258 257 1283 5172 19223 23048 13066 15263 4946 9478 19200
217 6913 15965 15934 1307 1679 6114 31453 7448 11323 14490 14495 1809 15964 11733 4616 9689 39525 10945 11304 11301 11302 18238 10540 11250 10575 11249 10574 10572 10751 10719 11263 33847 10783 18901 5560 13061 21109 11800 11433 10556 13088 10838 20771 5528 10923 10722 11298 10787 16992 10736 21232 10902 15545 10788 10742 10903 10551 25939 40688 5487 39783 5654 14957 20242 10557 10897 10554 15549 2201 5456 11281 10919 5553 5532 10547 10702 11230 10760 37837 15540 11826 15552 10529
218 13805 6865 4289 2363 29656 15427 15555 1234 8057 1594 9922 17907 8607 24358 31726 1665 8063 8688 14300 1469 201 2150 18669 6559 39644
219 622 1581 1578 3028 3097 6570 8658 16988 2464 547 557 11134 1791 25494 1580 4656 30197 30550 39327 404 546 3047 3070 2472 39098 14255 440 6574 3106 301 3059 34662 3739 3105 13160 3108 13794 20696 1611 374 205 402 38322 9635 529 16533 764 14132 5428 403 478 3737 13674 3107 2242 187 3076 12133 4598 7417 1617 30880 10254 34480 5412 34268 8739 8693 11711 26160 9398 1165 4289 160 30482 1236 559 13308 2247 2307 3041
220 16014 12893 642 17760 12612 18259 2878 19852 7127 2877 12733 2880 15872 7145 7288 14642 16246 24765 33064 1918 39909 14610
221 559 1811 16185 18473 9787 7768 12092 7710 9755 7791 14801 1687 12621 5685 7697 34121 7920 16072 9797 9805 9790 12248 20485 16076
222 21739 18514 6696 1811 2525 6482 28651 31512 4914 2896 17011 1437 2319 1831 1795 447 409 13130 801 529 8189 3049 3082 1555 2150 619 2323 5015 3261 23454 1169 11647
223 10782 10788 10789 11409 2200 11424 10722 9986 10901 11298 10711 10931 10173 5530 10115 5541 10843 10735 10729 10787 9978 10718
224 26798 878 924 630 2635 4430 13769 18576 36626 4230 886 12887 283
225 1965 2525 15133 13836 7953 4030
226 1855 1857 1850 33280 2972 2635
227 15842 17646 35514 25169 11672 19761 13021 34026 8118 17627 8910 28660 8912 9546 978 15768 21 19 16702 8009
228 8095 21821 1658 5736 1650 15941 7543 7605 26263 20491 15182 8099 17767 1811 7257 40645 2773 2750 2659 642 9257 3615 2525 2555 9713 575 3221 160 6210 9684 16454
229 11196 11203 11416 11447 11202 11409 11204 11240 10215 10214 10213 10789 10932 10835 10890 10843 11435 10783 35259 10534 5555 1330 10897 19410 10137 10913 10931 11399 9975 11451 11450 22861 13762 5527 10895 10787 11249 10893 19426
230 10735 10539 10583 10584 10585 10843 10901 5541
231 3089 10326 5418 4622 12287 3092 3770 187 329
232 4294 13041 275 25487 2298 9536 11015 9535 129
233 29679 29393 38349 18181 2314 11898 11913
234 11403 11402 27765 17558 10537 17409 11404 10215 20772 10583 21233 10702 37514 21205 13610
235 4796 3154 4887 30746 32008 34354 4890
236 13254 2974 13165 3955 3263
237 25154 23911 22400
238 16454 1411 5848 6268 5309
239 10117 2201 13056 20780 10548 10835 10761 10783 11283 9983 17560 13061 10575 5530 5451 10583 11304 10555 10529 11893 21234 11273 11322 10702 20266 10836 10579 10832 10549 18826 10102 10715 18815 10735 10787 5536 10291 13765 10128
240 1811 26736 34232 3181 3155 38049 10802 8201 10995 1459 11054 38573
241 16838 8 7496 8077 4 718 19727 30019 978 84 116 114 6021 2 126 8108 96 100 8075 89 7595 6 5983 5974 1218 2222 7100 9931 16494 192 39839 37582 37625 6131 775 805 545 306 324 319 551 323 619 1210 2291 1436 1437 5426 10367 559 23621 97 1 7497 6017 111 65 94 7513 93 11960 11959 31617 91 5 66 98 103 112 7516 1215 7598 283 7588 87 6010 86 2203 2202 11120 10107 11246 11199 11198 10717 9239 10142 5538 110 1352 2221 1213 6012 7600 7606 3191 563
242 1268 21564 1546 1483
243 12464 821 29367 12256 26221 17167 3350 24366 3955 3331 3972 14774 3922 677 6842 1042
244 9639 2466 3768 3097 2263 9528 3085 2662 9281 11979 14663 4429 6537 5112 7053 3402 25465 9280 13774 25463 10610 14643 5114 5113 16276 3407 3401 14664 5117 18577 35900 5115 7021 3400 25474 3404 4430 160 559 547 6981 11716 13907 11703 3107 198 5379 3739 1563 9829 39928 33533 477 3105 201 549 194 329 31368 403 550 3737 34995 309 187 3071 204 3096 35006 2461 801 35008 38562 3031 440 2291 11711 6936 34473 197 176 11717 2467 38111 5006 4519 529 9637 2252 7383 205 3765 447 3092 3035 3099 40974 1795 2319
245 32638 34916 32637 39357 11660 23440 31031 19771
246 10915 17557 10109 5458 21232 36432 5530 5485 11410 5450 19150 19416 10551 13656 2427 2453 1302 10947 5532 17549 11293 17552 5475 10102 10905 2203 11666 10586 11424 11284 1806 5214 10167 13053 18891 9121 10723 20250 1330 10843 10547 32529
247 5531 13060 10708 5541 10940 11819 39783 9986 19427 10528 10527 15200 18849 11195 36715 13086 11392 36432 22855 5483 10900 5485 10899 18235 5528 10286 5484 10905 11452 10214 10587 10834 11406 22865 18902 7974 24753 26575 34817 11652 13645 10936 24397 13950 18868 11399 10720 18874 10942 20775 10904 36436 6423 12438 2203 10579 10729
248 5560 11233 39459 3745 10735 11450
249 4673 38855 15288 8996 10971 15277 9004 7525 15037 11002 25979 17165 15040 15287 8352 15290 15036 6012 7600 7601 7606 15041 15286 11000 10998 21295
250 1156 11694 8686 17055 34051 39928 3047 12327 13142 6559 20699 5630 39479 39907 31375 20838
251 12773 9316 12851 13796 2365 2372 12695 1811 13657 2203 10555 11252 10547 10843 10715 10702 18814 10527 38003 5470 10115 5505 10847 40523 37459 10836 24397 10904 10534 9978 10850 13060 10891 11452 11244 17558 40908 36433 10167 5448 20788 5553 10551 13655 5502 10177 11300 10729 10201 10531 10718 10532 10832 10735 9986 10580
252 11210 11209 11213 11214 11215 11216 11211 11212 11217 19455 5213 5560 5470 10702 10161 10843 10836 5538 11391 10735
253 645 3549 9478
254 15011 9325 27029 35170 7946 9923 2970 27636 4073 28397 12722 15071 4160 4129 15272 23463 27025 23146 17851 25735 3947 20290 991 992 7487 2961 7486 13443 4344 3846 17648 3851 13196 3938 944 35428 30903 27023 37328 23143 466 711 12584 8323 1830 3886 3932 675 4180 1754 6517 11919 4050 1067 20879 31514 710 20291 4071 32292 1060 13166 16027 11140 16585 1933 8308 14466 4214 4030 27427 14763 12703 15653 990 18280 28976 12701 12967 6664 14465 14716 4130 1935 7894 6520 18829
255 14403 9900 13937 13093 17508
256 237 2643
257 16983 1509 7120 6507 7929 1033 19272 12694 25369 23563 33369 21084 26541 3322 1084 11500 673 6477 29888 3317
258 4321 1023 4294 4302 4991 16542 36409 29543 5340 3064 34138 4335 16540
259 38642 11880 7913 28087 12730 3011 3409
260 12453 5474 5485 2203 31844 31841 31842 5172 22689 22692 20250 5475 2166 1306 283
261 10639 15861 12338 4686 12339 13748 31806
262 16046 2655 16045 2653 9872 3536 1023 2976 978 2136 9380 39676 10337 2895 4657 6597 2249 2295 31368 1589 19357 29230 4840 7382 3765 40712 2483 2337 27637 3533 1061 2993 1064 2797 2923 7458 7459 40140 2525 160 559 1795 197 620 8879 3092 5763 2289 176 7194 205 186 5006 3133 2464 4519 301 2146 4353 194 40974 3105 2319
263 34346 8264
264 20503 20506 21644 18797 21645 18813 18812 38737 18799 19392 19394 26767 21643
265 870 4003 654 10419 6857 1744 13965 699 20212 3909 13382 37431 18352 15105 20216 1816 13380 2396 12176 822 28455 5519 5518 1356 1627 837 6682 7618
266 14793 4217 32296 4265 3370 16183 17827 17773 18111 2824 2525 11095 16562 14451 39909 459 8334 15271 9264 27366
267 10787 5505 25938 13645 10777 37458 10164 13081 4635 11390 10758 10910 10935 17231 22861 10926 21213 5474 5468 5527 11224 20781 10700 11250 36429 5551 10725 5541 10211 10893 6753 9985 18875
268 6432 4375 6569 6883 6347 422 2261
269 21378 6670 32131
270 184 39317 5711 19627
271 16964 13249 20236 7620 16971 3192 31419 31418 31417 16003 8095 837 8968 18627 13076 1811 10694
272 21648 8709 38148 8095 21289 4294 28018 10826 13922 33875 14504 160 1242 21046 8302 1755 12696 15597 13933 13937 15207 26901 13924 37766 26902 29393 35991 722 13664 18602 1916 7618 12592 2525 2493 2337 718 6110 18400 3012
273 9271 27432 13935 4059 1915 16234 18699 30334 991 16558 8329
274 5222 31755 24940 6735 40611 35608 19673
275 60 63 64 8074 3 56 3191 3220 17807 4261 19721 12961 18857 10962 8870 30679 33056 30064 19377 2605 8214 1242 11736 30481 7481 10516 10687 21047 15438 21046 7480 20086 12939 17882 35878 18596 36983 36264 20088
276 16304 13072 25817 20421 3549 18463 5079 19223 9531 14744 32752 9506 18820 16168 27123 9552 5248 718 13722 4198 12340 16019 16144 5452
277 30085 31508 16951 6923 13552 16969 17958 28609 20142 13248 30530 39258 3296 6483 23137 17957 16970 28475 28615 4702 22226 12415 22232
278 2491 1708 6016 7540
279 7711 302 545 293 775 6821 814 2078 8326 187 305 559 1811 7725
280 160 6719 16167 10673 2191 1415
281 4785 4798 16875 16873 15334 16874 16861 4828 16848 16235 3618 16968 14640 2053
282 12554 6204 6688 733 1878 461 13795 7490 4344 13217 2525 3094 410 13793 3737 26277 13321 6624 3087 5775 2324 12540 2464 4623 14778 16525 20024 11711 17009 6933 3041 8610 5423 620 13324 28954 34995 623 3739 36220 309 559 397 4646 529 13124 31669 34050 36075 9363 40178
283 37010 30555
284 553 559 14321 17740 8454 3409
285 938 559
286 3533 19307 17369
287 12787 2786 19415 11841
288 8027 5688 31666
289 1762 2925 2382 15248 15267 30829
290 792 3137 30637 20215
291 805 7520 192 196 18267 199 559
292 4758 4864 3154 2525 1355 7859
293 32640 17795 19163 28099 9774 3167 7572 11835 7718 10461 7660 9792 16230 17761 7782 9807
294 14320 5174 13664 1165 48 28661 8928 3601 17616 10626 10627 16734
295 2415 2380 1824 8543
296 19064 12135 25493 34453 4579 30712 13159 1553 8773 16994 12166 20908 2895 6962 12185 11709 8828 189 4654 553 623 3109 5423 3736 1555 11711 6977 5083 17777 2881 642 160 559 10337 8689 13915 35001 34998 38562 35008 2310 40980 3035 19061 13132 18669 2252 40974
297 1501 2396 6525 10447 22052 628 747 2971 141 8332 13217
298 3600 15768 15769 15795 25663 20374
299 7458 14769 4230 3914 817 3196 12560 959 6488 2961 3016 4087
300 36164 15708 14622 36157 37705 37706 38167 36155 36144 36165 37580 37902 38621 13272 13271 38622
301 2019 2432 5701 2435 2433
302 11994 18072 18062 26025 16305 23052 6118 19191 19192 40773 5237
303 10664 30128 17643
304 1946 2969 3846 20885
305 3616 4764 4821 37859 19443
306 1538 16783 1695 2622 2623 129 160
307 4317 9478 13575
308 19373 8642 8656 29240 8675 16982
309 35404 33291
310 12017 15225 2971 11999 9776 5225
311 38277 34761 26258 5475 160 7605
312 9722 10600 6500
313 14912 8430 26529 23420 3572 16839 7743 7681 16050 1024 1025 4955 28109 40632 718 7912 722 1551 2525 37154 18466 3534 13292 7403 39339 14095 978 37865 11719 16051 21679 14423 15397 16220 15147 4294 19157 4678 30546 9793 51 36125 13275 13293 1023 1609 837 2019 28457 13176 1811 5490
314 1079 3864 8337 7758 628 3367 12591 16365
315 5012 3787 8685 22872 2337 5639 30090 5891 397 2067 34478 12180 2242 2474 205 309 9642 11144 559 16485 12327 1601
316 15237 19491 30905 1538 2365 12683 5317 3849 11476 13181 1761 8139 8255 3321 3875 2525 4289 14724 2406 4048 3328 1820 3363 6694 8340 1841 20213 628 991 13840 36592 6738 3898 36591 2970 7947
317 1263 12097 1242 3154 19363 4850 6874 15442 810 570
318 59 3 60
319 19852 15876 2915
320 845 2415 2525 3191 1537 17210 5436 17584 1481 17081 22790 17299 31897 18519 12728 14325 14323 32374 8564 32621 1546 8565 1313 17297 18887 8411 15013
321 9157 27175 24483 4618 36466 25414 1348 4635 29408 2234
322 26524 6734 5237 18180
323 6684 992 3849 3951 3952 1717 714 2286 475 1938 6664 915 17648 1724 11496 4214 11537 991 11764 1970 3853 846 22023 12902 2406 8114 468 2357 8336 12574 13204 12331 11519 16646 33905 16987 18224 20878 15269 1965 628 3352
324 1530 16586 13193 242
325 11343 2136 1586
326 34806 16757 3505 39554 7184 2745 2773 2847 2723 5110 28132 36680 19807 5104 19812 7137 26799 35206 626 858 21951 26796 36716 29915 15213 15211 1038 9735 943 1059 3356 9737 1040 913 2913 958 1058 9736 10011 10599 15682 15680 10020 12596 10008 11609 9738 40233 8255 14595 4343 15677 19495 1074 15676 985 15681 2914 17523 19270 19269 543 542 857 842 728 24947 33477 8840 19498
327 8268 3968 30996 2956 698 2365 195 1831 194 201 1428 2100 412 2934 1708 1709 32660
328 19639 20197 19476 27685 7861 29682 36058 12466 18356
329 688 3293 3250 1874 9266 2525 5218 5217 160 242 1546 5174 1314 8454 5195 1500 19614 18026 10813 2441 22028 5851 569 17245 978 1790 2319 2155 553 17269 34998 35008 805 309 35006 35004 35001 38562 559 10694 4294 13704
330 3352 3986 3999 3994 2381 28837 4706 4707 6520 737 9927 6495 37326 13453 2356 3920 23838 3320 17649
331 953 16615 594 4045 3844 38800 13375 25874 6852 632
332 3605 3604 26246
333 10694 4202 2337 8252 18855 8554 3192
334 4599 2432 261 242 243 39015 4274 8906 16709
335 18960 31522 30227 22745 3605 22242 17484
336 6650 805 14344
337 7923 16896 7924
338 10636 15779
339 5687 2649 19944
340 160 11437 15541 11423 11817 5529 11283 5527 10587 10947 10184 37459 5488 20776 11416 5502 10702 15544 1328 19012 1635 5705 15442 20596 1212 10207 11220 10128 10788 19725
341 718 25890 15263
342 2219 14504 13708 11459 39973 6044 3567 14407 7 1609
343 1577 26743 850 27460 19630
344 1689 1235 6225
345 35658 28573 8512 36522
346 10337 621 39676 2895 26160 296 21014 529 4522 370 12179 11703 277 2483 206 31879 27816 2361 8694 2263 31925 6375 13304 197 805 1563 1582 8772 3136 16525 19398 5882 1569
347 692 1053 1811 2525 598 2276 605 20411 2954 4121 571 1755 15075 12582 17030 18065 4122 2032 1760 15276 6694 36591 9298 3264 3898 3244 20412 4131 600 653 3880 3899 1870 1882 6477
348 2964 1818 696 3911 11002 11350 8353 15036 11965 3191 31516 670 2380 1824 632 871 2415 3323 14788 991 4122 585 6510 3735 1897 1970 5562 3958 3351 628 4044
349 15350 35132 40286 13112 14001 23329 17677 17684 20484 2335 4910 28990 16846 14791 14015 13847
350 2554 9116 4493 9028 9018 3492 3454 3443 3450
351 7545 37272 34702 18957
352 288 19621 2971 23070 2365 30351 3196 14764 1843 20707 19468 1758 1757 628 2637
353 31926 559 6801 160 33062 14399 23594 11568 14403 11564 9901 3012 10684 1541 19011 21007 11660 5423 20248 9650 9491 2266 4581 18402 26864 3039 13912 4582 34047 3732 34363 2247 6624 2258 2251 11711 2263 8681 13915 33368 9291 8063 18550 190 620 553 205 1430 35108 6385 20173 39859 6977 4565 9359
354 26566 25688 20944 22102
355 5367 12639 7738 9746 3159
356 792 538 794 795 205 15177
357 13389 3154 573 1944 2964 15292 3352 2044 10998 11350 8353 15267 871 17735 17338 722 16024 13219 991 4540 13436 3735 632 2382 3911 6694 2525 5562
358 3841 12567 15213 32827 701 8252 1079 19466 3862 40013 2667 23831 1870 33504 2403 15914 31516 4122 605 11463 1837 1970 1866 3238 565 654 23838 4139 14724 3864 37326 1755 2387 13954 15476 15128 36000 9447 14763 9720 8302 3859 3239 671 8308 461 3251 1739 19868 1937 27023 28148 1732 2963 4127 8148 3240 12988 3378 17733 8329
359 24018 1314 722 6664 6477 2525 1683 8834 37214 1480 1481
360 15013 37724 1847 4205 151 12406 880 1941 3947 2372 17685 35083 8537 2034 27775 20707 4003 15512 27403 17360 16586 2736 4014 19489 1768 4082 958 15217 1708 1817 2994 2664 4075 39822 722
361 380 9169 9698 9196 29126 1363 30371 5816 3542 3627 18891 9143 9157 29120 1340 1362 12673 3460 6886 5320 9195 9158
362 3283 25488 9189 7290 7225
363 11454 2217 9476 13591 28110 4434 16919 40004 2011 28401 827 33893 837 20182 25499 2935 1772 692 2525 6115 23243 14946 1352 3191 2971 34347 9871 1023 3548 5717 645 8266 29082 9503 9519 718
364 2310 4841 1791 559 10694 28110 3191 16793 14946 23243 211 6115 9243 1352 7100 2971 18706 26863 16266 11807 33865 644 5717 645 9476
365 36081 10280 6624 20034 11382 12265
366 10091 11221 22784 30600 5560
367 3758 24344 28124 24345 21032 11655 23444 9863 34471 9862 39424 20798 27130 22698 36846
368 11660 40325 21007 34916 32637 6423 9240 5557 5474 20250 11651 15544 2203 978
369 39117 33881 8095 2673
370 6630 23159 14813 8021 2242 3070 4370 9081 22087 1242 1165 160 1441 2266
371 2635 692 12225 821 2492 12568
372 18715 11898 16752 2314 26898 10823 17508 11907 15532 13094 26010 718 3012
373 16822 8094 16821 21293 18626 11025 32818 829 3162 17776 12241 16207 7596 7595 21294
374 2674 2136 792 187 4289 3587 1821
375 21767 21106 32852 1609 19727
376 4107 4036 6042
377 14396 13016 10651 13045 26222 4684 13046 31445 27889 25657 25656 15834
378 14297 36691 9862 24926 3755 283 20851 32397
379 7185 7129 4214
380 11233 10142 17746 10125 18779 19455 5213 16455 30543 10749 6753 160
381 9662 7039 31830 14677 40825 9679 9952 13414 7016 15725
382 3078 20028 4570 7370 12296 27435 296 3738 540 8328 11944 978 38192 4202 3261 17810 559 9396 36700 39677 5615 1430 553 15922 10231 2417 1469 14300 20700 5639 8773 36749
383 2867 39534 31488 3430 13759 38313 8906 34496 3419 23655
384 5430 8401 5173 9881 8402 32528 1537 15391
385 9422 15836 26146 21318 15351
386 33993 3425 3430 34496 25762 16204 3419 30522
387 24767 21199 35873 15377 1428 20036 13834 3736 16525 13923 1430 9363 28629 13135 12554 3094 8580 9895 6029 529 3038 2319 1615 8828 8587 12169 2189 17015 559 2071 4575 4565 12270 8657 38866 13334 14215 16494 14177 2567 316 38111 2263 458 6204 11711 13339 5398 9359 12299
388 32642 4037 15696 9296
389 14345 17103 5435 3409 17095 12652 5948 722 2525 13574 20205 9342 3315 13097
390 10694 17803 17804 11318 1332 1303 8179 3703 19451 10127 16402 5487 23591 10091 34349 10583 9985 17412 10843 11400
391 2924 4540 1970
392 2406 4129 22047 11772
393 2384 3264 30893 10857 19729 4891 11860 18036 4895 4892 4900 4894 12103 28967 7858 4898 4893 4702 14996 13249 35976 1242 9793 30546 36111 19157 38445 28111 4678 1236 160 33062 4545 34294 4755 38730 20706
394 5875 14882 18385 5872 33955 26775 5916 27371 35142 26773 27369 27380 36525 27379 978 977 14458 11883 5923 11882 37421 27411 14923
395 9706 12421 22342 1417 5147 8037
396 7203 19783 9311 19337 829 18333 29417 836 19787 15344 23761 1355 22039 8963 1354 8366 7988 12805 2001 2026 2353 2025 822 12798 18685 832 2008 2009 5508 12806 12810 5507 1628 39035 12817 1627 9224 12800 2005 38944 19797 1998 18630 2006 9310 14972 28739 19338 30117 827 16912 5511 22038 19788 826 5512 1353 17038 23760 837 19779 1287 4399 160 1597 21713 34095 1393 2205 1412 2559 28387 8058 30056 1302 14489 1594 1469 11339 19778 13791 16495 16497 34362 39657 17064 309 310 308 6624 17007 1835 13326 15922 3036 20037 11338 546 6372 35285 3050 7353 2526 5578 1321 1127 6184 1128 39622 38536 6171 39621 3655 6731 3654 39633 39623 3636 6178 39631 6179 3648 6723 6175 6177 6725 3649 3650 1674 6101 12544
397 37798 1609 39973 19727 10805 39667
398 13775 20113 25474 16278 7040 7022 3403 8195 13785 4430
399 3213 27385 21274 32099 32201 28940
400 20378 8446 35749
401 7225 7234 23579 2849 7177 13951 2688 3127 13222 4431 2337 7164 17778 16764 5104 17444 35280 28987 6737 3800 26524 8979 5172 32440 7233 2714 5754
402 36219 12091 9809 9753 9754
403 8149 3597 3598 15781 15795
404 1012 31977 3534 7336 1021 27148 19245 3580 9871 18496 9991 36097 9470 26507 15156 21686 35705 11615 32444 15349 15348
405 369 194 1285 3810
406 12947 20121 7721 2337 2635 7459 1095 11510 2991 3317 11606 1051
407 626 571 691 1851 693 15069 35266 3354 3216 3215 1744 4782 628 23435 5928 6452 18384 18368 978 4900 2525 1843
408 9158 18169 1336 2553 210 18170 19565 31380 5067 343 19587 433 327 9082 183 5321 18152 335 425 422 38434 3112 346 6263 5759 6271 363 31381 39567 2172 1307 5788 388 2297 5791 4448 5833 4468 415 416 1406 4357 160
409 4329 28738 21648 8709 7425 15019 36121 32171 643 51 722 17113
410 3022 13139 10343 277 33961 194 10337 12325 3068 11698 2895 205
411 33625 33470 15399 15395 21263 17483 34937 15400 17020 32420 32423 28480 33471 17019 28481 25767 35895
412 4011 3263 11870 36848 4033 1761 1072 7950 1987 4039 1964 9867 31191 39140 15869 20883 36056 33448 36000 28840 653 34342 12988 2930 2917 2675 15106 39673 978 18527 26250
413 33323 10458 16014
414 1719 1720 1721 1718 461 594
415 1954 38313 34496 15756 3430
416 19381 19383 13272 12382 38305 38825
417 1708 5127 2525 991 699 4900 2667 2276 7745 20228 2968 1096
418 12115 12102 1627 12812 13785
419 20117 7056 5113 35649 35970 13772 13770 7002 2525 3915 27637 1104 2635 4430 16284 15721 9459 17538 22335 18576 14766 9679 16290 9280 15725 9659 9664 7031 40825
420 22064 14648 18820 18644 21668 4489 281 9849 27806 6630 6969 3747 3743 16188
421 1972 566 2959 473 696 699 4107 1964 4105 7944
422 669 3942 4046 571 1933 10035 6867 1650 1654 2382 566 729 2917 19130
423 870 9432 2388 1857 14702 6676 12564 3903 7962 3206 16609 652 14611 1060 16574 2930 1933 1971 937 4103 854 27020 1076 862 18349 15865 14607 991 12405 16344 16356 3838 3844 3946 12200 3316 2917 18699 11469 648
424 9504 8266 160 4702 15271
425 12733 19804
426 15405 17462 17468 17470 35021
427 942 19280 1061 2939 2988 9285 20226 15255 924 22679 18898 35131
428 1933 5917 3871
429 9822 2474 4623 4629 1428 8593 30787 6029 6619
430 1509 2932 722 2281 3252 3297 2929 2525 6423 6406 3722 16094 31555 31864 10694 14711 16354 2937 1824 2382 4131 1029 3558 2964 2952 2930 16036 3124 632 2963 681 12702 1933 1843 870 16366 744 991 1842 2917 2395 6524 3561 585 670 3958 2958
431 5004 801 35945 16427 37075 20336
432 1640 2229 5629 5294 5290 36465 5827 37322 2641 23944 2616 6242 2587 20567 1359 10697 28374 1197 642 28604 160 4398 4507 18914 5609 5697 19779 7693 1811 4416
433 16246 21239 9925 33322 21251 25992 3615 36784 23277 2337 722 1500 1509 3326 3810 17114 13502 2525 4545 15481 33324 32944 15477 15478 25993
434 10493 3589 10472 26929 19871 19908 19913 19911 19910 32266 21739 6696 32800 32799 10498 32265
435 38554 12627 5195 18382 35533 2444 19296 14071 35439 980 1537 1509 8494 5200 18384 38132 18380 18357 18366 17486 978 2662 11968 2661 38905 16110 3261 28850 5874 5925 5922 5932 35143 18377 28848 36898 19299 14062 27426
436 6159 27338 28486 6160 26016 1250 24482 1155 31457 1292 9256 18925
437 27148 14420 1023 17959 32667 26579 27686 39669 4905 27453 4887 4886 33669 15753 828 822 7340 33048 835 1356 1627 2014 3610 4890
438 8337 11753 1993 15491 2382 4026 15871 1907 3922 1977
439 15613 29258 14802 39972 8474 39120 11629 722 17159 31261 7120
440 296 205 2242 3059 204 6933 12181 2141 4519 2289 176 397 11134 5425
441 16937 2278 924 8321 3926 15115 3132 2367 3853 9441 2396 7944 11522 1755 3328
442 5059 1025 4008
443 11328 6011 9004 15286 11331 15290 7525
444 7726 7720 18604 9814 30890 7575 7679 37849 1314 7920 18606 12247 18449 14639 12253 1811
445 34032 12657 14388 12729 32618 8979 20980 722 837 1356 4994 3583 13465 40261
446 6559 1541 35743 10302
447 2923 1764 11500 3849 3367 11773 16352 32120 4120 159 18526 996 628 9264 4609 2635 692 741 590 11480 12723 27028 3897 915 32826 656 9271 16618 951 4118 8235 994 18338 12697 12715 18571 1910 15110 642 3107 5418 1577 2319 186 559 3304 2525 467 18701 468 3202 2929 13501 18527 15765 6477 12209 4351 4095 18773 20407 681 8126 1874 25374 9720 20042
448 20653 7936 4540 2337 4545 30957 17863 17647 1739 924 1811 875 3307 3991 3988 6684 3373 11094 1964 18337 7758 26913 15301 29931 27686 9270 2525
449 19054 29440 2337 3419
450 3951 6520 3250 1726 4222 554 1042 1764 6667 2525 1023 36655 23421 3565 36982 26422
451 3537 12458 8101 13371 26195 28356 28355 7605 1537 13491 17306 8455 17689
452 11419 15544 13763 11077 7461 17960 15458 21406 2203 10904 11394 11245 11292 5560 11388 10556 11430 11294 11254 10222 10715 11241 6366 37172 2514 1307 18875 10735 5532 10902
453 267 7431 13881 249 250 17152 252 253 1502 256 257 258 1526 1513 3413 1686 35515 1238 2624 39676
454 7786 39641 38148 21648 29679 23600 2313 14404 26900
455 2983 3901 2799 25383 11675 37167 18295 8239
456 19498 17644 11467 5135 30899
457 6869 1708 6510 9443 1756 31519 820 669
458 2971 5368 5195 1537 2220 2432 1352 8875 19581 23441 39742 7567 14160 17606 30606 1454 160 20922 20991 39741
459 2041 1971 4098 6520 10602 15055 15080 12537 3958 3349 37385 4105 4107 1923 1946 1873 2400 15655 2387 1870 2042 1023 6984 5287 1021 38957 18618 5288 555 9871 2525 7260 4018 2396 14502 991 1757 40879 1906 15652 8305 15029 12335 17610 2942
460 869 3196 37428 1960
461 14172 10264 1586 1831 553 6398 3792 9817 1617 14230 2467 194 1567 176 1575 1593 1563 620 27823
462 7262 3192 3873 2930 1899 13383 15104 4096 3122
463 1784 369 1790 187 194 189 6149 559 2337 20196 17264
464 4011 16042 11101 10035 12005 11094 33976 4287 3587 16445 2434 35350 35347 7769 224 19821 12291 18581
465 9198 6744 13816 4905 19278 12223 8382 939 12353 10428 18481 10427 954 953 34263 16425 25847 30356 30358 6747 39038 36021 17710 21309 23290 17706 7404 7400 33798 12414
466 431 429 416
467 619 2146 556 3137 7367 22750
468 7865 14640 12115 1023 1025
469 21317 25654 25530
470 559 7073 39934 1625 22098 10978 14893 28841 978 6442 2619 38366 17754 3144 20168 3167 3143 39119 18607 2203 1352 6244 25415 35046 3820 1537 5660 160 40495 40073 35243 12962 718 1811 4294 39561 2174 1128 3655 1127 6170 6181 6179 6180 2584 34299 2507 2519 9106 28382 9108 6200
471 32426 33470 30324 14588 30323
472 34964 36048 18429
473 13314 13794 8773 1835 10349 6976 8772 8890 6204 12317 2292 13906 3024 11699 6030 4567 26012 402 8612 2257 9380 32219 7518 1832 4585 10345 8047 13923 5378 17910 13320 35226 32209 4610 14191 2307 12319 529 1601 1207 13135 3420
474 5887 176 1790
475 2282 12335
476 2553 25204 7447 2541 11310 39354 15936 39429 3798 3682 6223 1634
477 8927 13 38101 48 10666 15804
478 1653 14429 1513
479 155 16224 23703 20395 17406 7550 3240 16339 23993 15641 3860 6694 1851 2409 2525 30766 1500 5202 12984 13392 619 2484 13422 1079 26270 13446 3386
480 34455 3810 14322 1509 16246
481 722 2525 881 3823 15103 4131 632 653 36848 581 3250 1732 12331 2382
482 15035 865 1821 841 15219 11917 605 696 1816 2530 10051
483 184 38857 2580 17407 2476 2456
484 13567 13581
485 9492 6582 5702 559 13388 31584 30996 600 9429 693 160 1236 1937 744 722 34627 14325 5946 15102 1876 3888 16231 4026 2365 642 20141 38905 16111 22298 718 19216 3011 15751 3414 2493 1538 1925 155 978 2525 40135
486 8369 1357 2020 1353 12215 8371 824 10694 3006 1277 17175
487 31383 22099 22100 38667 22058 16443 7410 5667 28142 26916 19710 32679 2438 2437 2434 21660 35351 7932 5893 13052 11254 10104 10175 10551 2203 160 559 6142 766 199 2484 4519
488 1023 9993 27416 39347 34798 1019 15173 25631 22093 19353 15174 37435 28640 20368 31989 23122 15166 30990 26026 15172 37725 10805 20827 36378 37730 3187 39465 23274 20826 6073 1609 37729 14460 27970 39373 16812
489 6294 1406 1307
490 12353 34263 954 29661 13423 1868 13455 17930 14861 3217 20675 4705 3118 4142 4140 4541 3394 13421 18052 12984 16024 12577 1906 928 929 1077 1078 8309 20051 4338 29226 1079 12969 10424 15481 14851 10423 1820
491 18410 10873 1089 961 922 12658 20126 15078 2912 15210 4146 18413 21977 28534 1049 13434 20211 6504 956 3353 19458 21972 1101 10032 971 1093 10033 20618 2796
492 3132 870 16034
493 37889 40296 37893 40056 39706
494 57 7507 5983 3744 34626
495 12519 1843 2525 19338
496 9459 9659 14666 7029 7046 18576 3400 9953 14665 4433 13769 9463 9955 20117 35970 7031
497 1057 629 20212 30106 4173 1039 2283 597 3953 2380 1082 912 616 2969 7748 40576 1843 722 12262 3810 8837 9872 11616 1023 51 6423 160 6199 3634 1125 20018 1236 8252 3323 1755 3558 7894 564 21399 36251 33550 15112 1509 30391 23638 1538 2971 8704 8095 3192 2337 821 17824 837 5515 2019 5115 4430 1757 2365 17660 26040 642 2525 4289 39353
498 11672 16708 4684 13021 8199 7673 7576 16181 7698 12250 15045 19436 32639 7697 12091 9795 15044 7791 17938 7790 1811 12501 14833 20994 3409 17102 1311 1493 1509 1502 1277 4994 3820 1546 16983 5685 17364 36428 17276 1500 8388 722 12260 8906 30678 16704 33749 8921 29207 28 8013
499 7163 17781 20112 15912 1843 15106 3846 473 15053 3955 991 3263 3922 2276 7947 1875 12200 2525
500 1473 10359 17273 3022 10250 5013 4519 2465 3038 5617 6593 198 12182 2265 17772 756 9962 25995 6561 9642 4843 1478 8155 10253 1464 24777 35187 38679 1555 404 440 12322 621 1617 9621 2238 12297 31859 7356 7371
501 1735 3857 13571 1870 13484 2396 12567 37947 1708 601 12985
502 10684 9851 3019 9852 3077 34646 13901 9381 13900 15894 5615 13135 25213 3092 13915 2568 38726 5423 8728 7391 12312
503 21654 4416 5465 5466 16194 21655 17531 17534 17532 5467 21656 29571 17533 16110 1541 6903 4384 28375 20274 1638 27342 8800 18842 1677 35988 23955 9244 34224 9257 7448 2205 2540 38905 2661 1811 20442 160 9247 1128 40041 3711 3662 1129 3637 3663 17185 2192 39056 38677
504 1566 2067 6558 20528 805 2888 14141 4519 2263 296 5015 35008 34998 35006 38562 27350 316 10382 21015 10235 38111 309 3051 529
505 5440 5344 5343 18458 9778 39548 16812 1545 1509
506 718 14315 37498 30652 25485
507 21251 23948 7752 39309 7473 16246 3615 17163 31985 25992 21239
508 2957 10412 3383 4204 1878 1708 1915 11561 16609 4014 3913 4149 12983 4122 870 628 989 1869 17865 14724 3560 18696 20866 14634 14799 16616 3129 3922 4178 671 1817 627 820 13205 3830 36848 880 18678
509 1685 1010 1016
510 23424 5276 5277 9469 9871 3575 37226 28644 36461 34346 15631 9991 10003 3582 13293 13292 11614
511 792 3162 3161 9806 16076 7920 4416 3120 1811 36826
512 406 7791 4416 1811 4344 461 3120 2493 2525 7720 36826
513 3912 1949 11099 15497 15634 1731 16347 3941 8152
514 837 2876 642 36675
515 5560 11450 5502 5538 10916
516 35137 3036 559 718 643 30592 35252 28911 24006 28898 30779 39856 29081 20628 20573 20629
517 6023 552 797 2474 2315 9691 15372 805 529 4620 4629
518 466 879 1933 1857 1851 2938 9329
519 26866 17706 30810 3346 1650
520 19412 16554 28422 21959 9719 27635
521 31503 16174 16146 38314 30737 26654 16151
522 21259 25823 29872 16141
523 9519 27120 28385 5613 1352 2222 14662 8266 32752
524 16124 16145
525 14633 1165 17029 11831 900 19715
526 4522 6131 553 3463 552 1320 5389 369 2098 2127 1433 1779 1428 775 32432 3464 370 619 784 791 192 3471 3266 194 189 302 176 559 7720 1811 18180 15004 1933 473 4344 991 3199 2525 18603 7713
527 7513 7541 1213 10986 7527 126 11020 10784 11115 1183
528 19681 3915 18214 693 1755
529 14586 1609 14529 5172 15396 718 837
530 3156 34309 4294
531 701 561 1708 881 473 2396
532 6677 893 1894 32937
533 18343 15213 27450 8138 28341 22843 39517 21765 1660 21839 2012 9216
534 2854 2773 2729 14355 2807 3127 19855 2805 2750 7283 7236
535 3192 18707 36041 21717 35865 27798 2908 5254 4958 22296 35501 23056 7611 10057 18105 20472 20457 19186 19229 19180 23060 25778 5226 18458 5345 11037 35664 12440 4983 2971 10830 141
536 20858 18312 17712
537 32411 612 20216 24604 1042 4101 4100 14719 26792 16556 1731 9471 6751 11762 15644 8127 3868 32410 16558 3955 3828 3854 1818 1875 4111 1949 3372 3873 3838 4003 2637 1746 11536 6750 29891 1841 8313 16602 9313 9441 587 606 1899 15634 1966 1988 4036
538 13242 12975 15307 7994 16566 21278 32386 19444 30136 25504 12408 25515
539 14239 12550 30745 559 4082 2474 3019 2467 310 1319
540 1538 3565 3567 1023 718 2203 10711 10224 10742 33007 10550 5470
541 11770 20609 738 1031 11441 16630 35933 16675 9338 9717
542 20981 1504 17583 1284 17131 35015 6033 34141
543 24799 10511 522 24875 283 3271 1317 17183 15673 18927
544 9744 4463 36313 4464 16075 4466 792 11343 189 3267 12379 3473 30542 3112 6896 559 8095 2363 1352 8048 10668 6304 6265 10667 18244 422 5558 10547 10580 19427 39043 11819 10584 39783 17562 11238 11426 1242 1169 978 456 5321 2226 20254 5828 13088 10164 6285 6245 1318 1636 7688 5313 6345 131 7443 415 5801 346 1236 12438 34331 36939 35333 30775 30513 12680 36940 14503 14025 628 877 714 7745 3945 1029 1933 8252 20876 2396 1822 1938 1714 1821 744 29553 2525 10669 9124 1692 15441 1295 1307 13053 2569 24482 6901 9986 2207 2593 337 6870 6111 20974 10295 2193 19997 7444 1195 6882 1109 39597 20253 23972 13651 1406 19587 6302 12424 14489 5324 29073 2502 543 736 878 2635 2972 160 6347 378 33680 23545 19450 5450
545 37740 28363 7315
546 887 6928 3792 2991 7634 2382 8153 2396 559 3044 176 2289 12181 397 189 1577 6933 4629 1421 5391 11134 8388 722 4519 2510
547 18528 994 15087 3835 656 7633 15094 966 35838 6476 3890 19465 3906 10435 7759 15078 10670 28923 3246 1933 1968 1970 7162 7161 26040 28043 5104 5110 19292 642 37428 13193 13677 30135 36055 26000 17685 13519 14390 7649 7646 27459 13520 23998 21407 12947 35847 14002 25507 6755 34294 2337 8536 12580 10857 13431 4890 16636 32959 13558 13248 30528 4735 37841 3192 1946 4034 3877 6689 20222 870 1842 3348 11506 35266 22010 10437 574 1029 2370 2406 11478 3250 8321 659 4186 1890 24600 15253 18941 18350 31772 35265 2525 25626 8906 837 628 571
548 8420 4870 38534 38362 16878 5017 12120 4818 12107 8416 16870 5041 16873 6760 16867 20482 16855 4819 4729 32822 8415 6757 15335 20149 4738 4820 7833 39497 34024 29719 20148 37859 3618 4792 4823 4769 4829 27457 4791 4873
549 30338 8002 8003 36 37 22 3598 15780 19 25650 17630 4700 17641 7999 17639 37964 25169 15852 46 8912 40811 13854 33749
550 30590 21376 9918 8861 37939 30573 22770 30884 40736 40730 40882
551 1469 23477 30103 8605 8829 9822 1465 22338 11373 3101 15890 30714
552 2314 18715 26898 10823 13094
553 7211 3505 19830 2838 25455 641 18246 15873 37155 17778 2822 2874 2765 2706 2871 14353 17779 16251 7268 12613 978 16087 16088 28887 3261 2662 642 2772 11842 17448
554 14503 3981 16934 1779 805 775 12274 2362 9450 192 799 3096
555 17946 11860 19642 3606 7849 4409 1236 34926 2499 4392 36984 11652 3790 7096 8977 1321 40235 2241 21013 22063 4635 31456 2236 8994 30404
556 2373 2337 21289 8095
557 34598 1500 5437 1537 2220 1217 3191 21715 11332 11346 14744 18853 123 5985 109 115 7588 6012
558 14475 14474 3207 1003 16018 20428 34340 6037 37599 5562 16073 9803 15034 20436 6038 16194 20437 7794 22758 37141 7681 1811 7743 15984 17533 17532 21655 21654 17531 29571 3191 8374 11075 1217 6011 7540 11352 31618 11036 5966 8361 8350 6012 7601 7600 7606 123 7508 8092 7603 567 7504 38573 5962 18820 8093 8359
559 1807 33439
560 3778 28419 4447
561 17701 18773 2972
562 12323 10255 620 9880 1602 8650 38055
563 15958 5705
564 18713 36453 7333 7332 18708 13879 31652
565 2008 9306 12819 12817 12818 12820 2022 38978 1355 18630 1997 26037 830 32194 5509 1998 9304 36924 16836 1265 36938 34441 29861 1264 8110 30615 21708 25491 16208
566 6991 7461 4415
567 1851 669 7961 1708 573 1076 1861 1857 4082 8318 160
568 39669 4862 12040 3261 2971 23070 5226 10082 12440 5452 17031 23081 19706 23079 28112 18462 1264 16836 3192 14739 15931 4702 28968
569 718 26255 1264
570 14426 2295 186 620 5682 1430 4625 2465 8012 10651 15820 12995 26651 20613 559 34659 11711 2302 3072 529 9188 2715 17766 9189 2472 2073 27344 2247 6609 3737 20233
571 38726 3739 11116 11705 11711 13339 3022 12185 2361 7353 7364 14399 23594 11568 14403 11564 9901 11907 3012 160 10684 11382 4576 6624 2258 3736 28228 2263 4646 5214 1806 8773 8595 6029 8779 6962 23739 3732 440 12320 1795 39676 10337 2895 3768 3294 3295 4914 837 559 9359 4565 6375 620 553 205 458 2250 9820 9650
572 14529 292 4523 619 11891
573 267 269 270 268 274 7423 7427 5438 18023 28086 263 4246 31435 3064 29710 4244 18597 4321 17883 18878 7440 242 7330 4294 4289 6670 1172 19703 5365 8593
574 20565 1553 3024 8780 205 3769 6962 8896 4629 3134 1571 529 14132 32949 21449 3152 559 3784 18402 19384 15230
575 38535 28856 8021
576 545 1209 189 199 802 288 17197 3549
577 4994 8434 1546 16983 5198 12494 17214 28618 1500 5195 13496 26535 39115 26007 35454 3800 26525 2646 8026 14309 8499 1685 3584 6077 31898 3810 8497 31179 18710 7312 242 8392 2931 5430 19136 17391 35909 27397 16682 13386 5685 36472 37619 5687 17274 5946
578 478 34626 8197 16833 33542 5967 8359 109 6 8092 119 5983 2971 5452 11989 6000 5973 65 16209 6021 34944 1352 3778 129 2222 11023 7522 7581 61 7531 5965 68 3191 1217 3612 1996
579 10074 4961 11995 22299 5240
580 3810 7605 8095 16786 7983 4598 2673 2363 722 5183 30874 2648 17391 12493 258 251 40047 13463 5188 37453 36781 35658 8385 35454 5198 32372 22324
581 1010 3261 20141
582 32441 22861 27774
583 2396 1920 6520
584 35833 5926 14061 36310 11885
585 323 1571 4523
586 4660 8266 31677 18820 33831 33256
587 17253 4665 17254
588 15304 26738 26913 14045 24931 21685 20365 32950
589 314 318 3792 374 312 294 313 205 187 293 5418 299 1571 371 189 316 12146 15994 6620 798 306 2360 2896 334 2301 2466 767 160 21841 3804 31899 1285 13385 35748 26018 20981 17174 5432 22858 8463 31869 5437 14317 1264 4882 4878 27462 15328 2337 176 12380 15375 3767 5378 2474 447 29917 2319 1831 2511 2127 4215 3096 13899 2305 18641 5405 540 1511 12261 1509 30096 14316 1312 18471 20199 4329 12944 266 7423 4210 7305 12932 242 32371 15061 1687 2670 30831 8426 1284 21252 5367 40018 13480 6076 6081 30195 1684 6078 17429 40522 1685 13838 36138 8028 837 1628 7209 18290 16921 4434 27690 23836 14319 5948 8509 1537 2071 1620 4602 559 978 3810 17161 4994 39193 36564 26944 16824 4430 7010 3407 5112 3154 32877 22866 28562 7859 722 22789
590 16624 12162 13054 37204 31720 7859
591 31505 35498 30738
592 7861 4910
593 40520 128 1306 2166 10708 11390 21846 35279
594 23280 16765 23282 21249 3613 10455
595 19086 1084 692 29911 3367 19751 32152
596 39528 38104 1546 5195 2976 5172 40264 17102 31277
597 2056 21457 2341
598 16755 2863 33282 2710 30966 34796 30967 28984 17868
599 25487 30611 30644 30078 25482 13357 14755 15672 14757 34965 14758
600 642 4561 31279 5520
601 36532 35467 978 718 14529 14551 37449 32420
602 192 1811 585 15311
603 7572 7728 7791 9754 12091 7701 16180 18606 9814 7702 12250 16076 9797 12247 7703 22225 3192 1811 7697
604 11562 11567 23599 10815 34039 13694 10817 36237 14407 11461 13692
605 1755 628 13166 19504 820 4149 15878 7120 3326 10607 2967 3261 8095 21650 978 2525 837 3558
606 33020 16612 1843 3925 15871 11108 18355 2284 991
607 34306 12963 461
608 16839 17918 30843
609 33054 26205 9954 27729 33359 16294 15720 25467 15486 16279 16280 9278 35539 14644 9673 13772 15725 9280 11979 7026 14765 13414 25880 13411 2525 1928 9952 8195 13771 35900 6532 11981 8375 17228
610 10751 10572 10719 11263 10920 10790 10926 10198 5558 9979 10578 10199 11274 11238 10569 10711 10563 10561 18906 9974 10560 10562 10735 9983 10564 10566 10196 10173 10534 10789 10835 10942 11316 10843 10582 11408 2200
611 11311 10547 10716 10908 17557 5536 10134 10564 10561 9983 10558 10563 10566 9974 10582 10711 10559 10562 10560 10906 10113 5485 11651 11266 11275 11666 19149 11649 20242 10207 10208
612 4611 206 7627 141 29695
613 22793 30476 30477 29784 20537
614 34483 12474 8570 5181 12617 30096 17393 1504 30386 19690
615 17706 17711
616 9181 5092 14383 28959 2841 19822 4555 29920 19558 17758 28102 5740
617 12270 7385 205 199 12379 6207 4582
618 1352 34238 27806 7977
619 856 4519 9350 7368
620 16689 26319 4685 30338 13735 15445 16707 15817 13738 13031 26223 15804 8908 16703 15805 39568 15770 8013 22241 15701 34830 3601 10666 4699
621 4030 6501 9262 6681 870 2947 594 754 12690 628 1755 1881 12724 6682 4084 9313 587 871 10872 580 1069 4053
622 7874 7644 8522 8532 20198 25504 35549 16384 31572 29703 23998 13245 32392 12263 7805 30879 28564 31570 14014 16566 33677 12926 13519 13189 28560 19440 7643 7994 13110 19649 4859 12965 31409 22870 7807 7804 28561 7826
623 26192 34760 38277 15186 28355 12451 36946 15179 15187 20948
624 19631 17869 12928 20483 12415
625 2310 194 176 2123 3421 208 1555 1790 303
626 40945 13993 13983 28626 12113 14049 33807 3610 13995 4858 27454 33615 7994 28624
627 598 12687 20871 20213 7967 2680 3969 17999 19488 18346 18348 30351 7458 2959 600 15266 8235 16608 628 2525 2662 1760 917 12708 2337 6667 160 4952 718 7832 1935 2925 12200 2996 1032 3313 6477 6839
628 5462 3221 30755 30756 22353 21265 40333
629 4234 17499 37852 4946 18100 12011 10074 5030 18451 23071 4976 13069 28113 12450 5452 7681 23070 19019 3549 22298 17191 35667 23052 35073 18771 3159 17966 2971 4962 1811
630 38148 8709 6793 6791 6792 6794 6790 6789 8715 8706 34935 2525 1811 643
631 165 33239 12605 12603 33244
632 2365 24014 865 873
633 718 7914 30547 12328 14034 2752 16756 7131 32199 2835 14362 4906 33550 2337 8524 14029 4888 13814 7453 4545 13868 32037 3127 16757 7169 4341 2766 17452 7249 2717 32136 23576 7303 2755 2712 7251 2736 2659 2750 19817 642 14380
634 1676 20988 6899 1242 2193 22063
635 2970 9325 871
636 40886 27227
637 16849 3617 12110 29719 4829 4729 33075 12831 32582 2525 18034 28605 2337 1538 4279 26197 7326 4210 242
638 18352 2679 21962 35103 10015 3367
639 16560 924 673 32384 3207 2525 1996 837 35113 29237 28953 412 764 766 765 6595 10304 2511 301 302 13915 23963 10305 20027 5682 30767 29236 27349 2315 33950 8668 6928 8670 20036 29378
640 7791 12249 9754 39023 3178 17493
641 20616 36256 8302 3856 7944 7940 18975 4776 571 3919 8316 3387 15632 2413 8335 20211 34736 6519 4101 1043 3359 600 13390 23268 3882 1897 15128 23831
642 15877 34335
643 17835 7127 2739 7733 7704 19319 7720 12092 33671 1811 2942
644 17890 9730 15681
645 35669 26204 7765
646 28613 11798 30198 12050 2662 22020 30514 16813 1169 16451 978 5859 7401 5860 13555 12044 15931 16331 4735 7856 3606 18556 21395 18557 18555 7848 16333 20143 16963 12039 12022 27789 16975 16950 16965 4893 4895 28968 4894 4900 4891 4892 23846 12034 26736 4235 20787 1811 17533 4702 7468 19607 3192 16952 2337 1933 3199 628 461 2970 917 1930 17925 16574 11796 3946 2341 30637 28098 19054 1653 36243 11577 3342 1660 11584 38854 5735 21084 18301 11574 11602 3341 1650 2525 475 3349 465 3829 14609 4703
647 11096 1844 19665 3957 13917 2939 3814 17301 7120 35269 14831 1508 18141 1965 9530
648 3394 12790 17420 543 17424 9319 16241
649 13005 16689 25655 8941
650 2806 2659 2740 32369 7293 7165 16755 19847 29400 4558 19828 35845 19856 5746 2705 5748 2731 9475 19257 6364 12000 5075 6120 19283 35322 23064 5453 5030 12448 19176 19172 8344 4951 38012 18464 40604 35327
651 20465 5177 5437 3012
652 1020 13274 3799 19621 1021 39618
653 15018 15618 15615 11646 241
654 21003 17735 1286
655 447 9528 8299 6589
656 2364 20473 23251 39702 4533 1811
657 10667 22087 6283 30603 1441 14128 447 621 1610 189 5703 198 2319 7364 3098 11172 529 5830 6091 4371 6904 9044 1674 9499 3626 9029 9484 3457 3627 1237 422 6347 9132 1336 1625 2633 4432 28420 3492 19589 5683 1165 13567 160 3491 9057 5795 131 1671 2192 5793 12098 20016 19595 1128
658 27390 11950 27385 980 9900 14403 11564 23594 3012 978 3211 36647 34974 455 6423 7665 2662
659 11570 10824 9900 13697
660 13837 17279 5430
661 2541 11307 6232 1240 8216 6242 22053 1302 3709 6308 1233 4289
662 336 2224 3501 9149
663 33828 31430
664 14024 3315 12290 19560 17777 19851
665 45 30127 15850 30338 15854 8937
666 9793 2472 2071 27818
667 10926 10936 10579 10201 10843 11202 11225 10735
668 20086 19938 1268
669 2273 5137 585 466 1029 871 4104 7949 992 14602 2365
670 3664 2609 16092 36585 30876 32419 20956 38797 25965 5297
671 4857 12974 4887 3607
672 10223 9978 11409 11400 10211 10538 10533 455 1352 10843 17552 10904 9986 10832 11230 10721 10215 11818 10932 5530 10947 10735 10787 10788
673 20997 5198 4994
674 2624 1149 337 5304 1692 131 436 10788 20254 1933 1759 2574 1231 128 8173 18610 10682
675 559 13074 12017 12503 12646 3324 5171 20392 2706 2396 7237 19560 14359 754 2846
676 640 600 3834 654 4063 8142 1843 9267
677 2514 7377 1288 6251 15380 2507 9500 5712 4532 3112 1258 1636 3715 3719 21306 1189 1304 2489 1183 2523 3701 6095 21025 38757 1143 26805 375 128 8883 3753 2633 5693 7084 1211 3070 1430 1562 14215 405 1553 1321 6268 9012 5676 1263 1231 2624 2616 2224 1690
678 7949 11753 3332 2927 9298
679 892 578 2371
680 22113 32358 171 1169 3261 2635 35973 27429 16187 18603 15120 4091 14963 2525 1650 21461 7756
681 13976 29270 39645
682 128 1198 3790 6159 6160 14957 11151 30068 2595 10682 7114 8163 1294 39620 14156 39927 24483 1174 1128 6184 3655 184 2541 31607 5578 4370 1441 5303 18196 2456 22100 7104 33680
683 12210 21971 9988 3367 3376 32122
684 676 3594 4186 4185 675 674 673 7948 10432 10433 571 26914 20881 11757 2408 10431 10446 13387 15252 3972 1984 1975 12702 692 20330 8329 669 2349 874 2936 1078
685 6076 12260 722 2350
686 14085 27365 27410 26766 38554 1577 3472 559 3261 18679 8252 1969 2525 1537 14894 35142 20553 5935 39339 29267 5237 25776 19257 14084 978 5452 718 643 12438
687 9528 10799 9851 4519 9363 14239 2067 5637 5422 13923 15922 28949 13800 13339 5636 40195 1624 1555 8772 3022 5615 2310 2292 3081 5423 11116 2895 17709 2270 40950 13794 1571 5386 4841 2247 208 13809 38679 17269
688 9851 18270 1632 2418 160 4596
689 31512 22678 16024 2918
690 6474 10029 1071 11506 1027 18488 12355 18489 21977 2799 16116
691 18200 31432 3261 141 18898 19421 35839
692 28442 718 642
693 3557 3559 15265 1973 600 25438 25370 28092 696 6675 654 605 18008 566 571 5125 673 29888 18698 4040 598 951 1906
694 15681 6488 10600 3140
695 33555 17221 18142
696 8348 18103 11995 18081 40874 20453 22014 19259 5452 40915 4972 30778 36424 10082 18084
697 3898 2404 10694
698 10061 19184 10087
699 14802 1487 17159 26535 250
700 9793 21560 36137 5430 6079 5174 1537 559 805
701 2944 3930 4008 2947
702 15337 7707 9794
703 21426 17394 30200 12465 30199 12469 30201 5604 13980 14037 13979
704 2805 19816 16596 9185 7125 7187 2737 3248 2747 3127 7171 2767 12893 642 659 668 988 9924 16606 2813 2825 7236 14374 2713
705 2661 1811 1011 23422 9435 1021 16837 31416 31419 31417 31418 39298 3261 23163 1264 26507 1023 12519 7637 11141 2525 19321
706 3266 10273 6031 559 2337 25614
707 37571 24005 9532 13565
708 7920 18606 28597 17916 9806 15046 10463 1811 20485 14393
709 3284 14755 8322 10023 14477 3323 2975 3915 13501 3121 20229 3606 7505 10422 1064 15102 4351 16237 3195
710 484 32353 10524 12603 10512 493
711 11401 30995 3195
712 21200 10226 17895 5423 13915 10280 10316 18750 30714 8052 23495 8047 8050 40891 20911 10225 18756 8053 30297 17005 8773 8664 356 360 19405 6703 352 349 351 358 6701 33947 9291 10332 36455 9947 12299 28351 9701 190 6029
713 1875 605 2525 18309 692 33538 9459
714 2766 11842 17441 2846 31488 31833 6835 639 9185 19846 19818 7247 18339
715 10463 3143 14393 7734 18523 7728 7729 7664 11864 7720 30832 7782 16228 18473 9755 7725 16200 25950 9772 10459 7702 12092 9807 7660 7716 7713 9795 16076
716 23945 13654 6423 21733 39477 15954 15957 15953 14836 25227 15943 28384 2233
717 19241 1023 3821 722 2525
718 13861 18057 21318 8939
719 10330 13275 2971 8092 8106 21639 25980 5975 7527 16828 105 73
720 7542 19395
721 8589 30712 12286 310 30880 6613 2302 559 529 8632 2319 437 14230 18756 20391 13668 31668 805 18551 34304 5636 478 3768 1469 16101 6645 30551 28414 442 19060 35597 36351 7364 5015 2323 8296 309 5410 479 3792 40713 176 3793 35001 38562 2067 34998 35004 35008 13923 40049 1445 4622 35599 15250 12161 21069
722 1811 5465 5538 10895 10583 21205 21233
723 3000 13374 11777 1081
724 11090 654 848 3991 23830 11657 8331 2525 2337
725 1023 554 9480 2395 2917 15461 1739 3250 16549 15218 3129 3920 2925 1957 704 13217 17996 1873 13209 3871 4125 650 1755 31975 1906 7967 1909 4102 14601 5172 2649 12626 14804 38016 19272 17514 12012 5250 5251 35501 11931 30531 9478 718 2525
726 5325 22756 5330
727 4264 30104 5327 30327 17738 16321 10966 141 1811 1538 15208 25941 7332 7773
728 308 1422 10280 309 11354 17904 4582 13909 453 6625 19059 1553 15372 17007 2263 22711 17005 33868 2310 9618 6624 37842 17897 13306 12295 8053 40891 1555 6618 8686 190 5636 21199 3079 17269 30786
729 37598 8252
730 28598 17811 7696 1811 37142
731 1027 3246 40412
732 19766 13915 4570 4569 12151 4571 20700 2141
733 17562 10175 10532 10787
734 5015 22690 978 6423
735 20298 4344 1755 14476 571
736 12739 861 12780 17890 29091 2867 628 701 22005 1685
737 20314 30451 11741 20503 22263 5951 28316 5926 19606 22262 20499
738 11812 18232 10588 18238 10904 11241 15947 10584 10095
739 160 15438
740 5983 11329 8083 10957 7535 5985 7532 8107 11021 10976
741 16463 5557 18870 5458 1330 15544
742 3223 13451 14478 3954 2525
743 10082 5225 18447 5224 3549 8348 6121 4946 19248 19541 9808 18449 5344 37776 5079 13072 13647 23158 30658 37728 40801 25771 1334 23766 20842 20841 19371 17748 33294 35745 31358 15675 31352 16893 38667 1811 6037 33921 18058 18059 17191 20782 19327 128
744 38445 18512 1004 559
745 11801 9976 1330 10782 5530 10843 10090 13077 10098 10787 1329 11435 10166 10705
746 10021 1652 21766 17649 1061
747 559 8132
748 1509 39320 3802 1507 253 8474 32621 17094 32088 24591 5430 18127
749 8095 7344 128
750 3133 302 293 8794 2474 301 5420 3105 2247 370 141 2635 25384 4111 2396 15869 2922 1821 3264 3876 37735 3122 30659
751 9977 9978 11255 17566 11449 20266 18864 10138 9239 10141 10142 10143 5538 11231 10134 10759 10146 25176 10147 5455 10148 10167 9241 10913 15548 10700 10907 10908 17551 10791 10552 10735 10546 9240 10573 10571 10570 10572 5527 10568 5525 5526 10567 18814 20771 17562 11238 10526 10843 10580 10569 10533 10527 10528 9986 19427 11279 10584 11427 9979 10199 10198 10197 11274 5558 9984 10200 10578 10577 13089 17565 10186 10558 17555 9983
752 2193 1638 35445 127 8821 1204 18269 1163 12608 5675 5348 18264 1198 14302 1224 7094 8247 8977 14937 2539 1325 34975 38798 40437 2633 18969 23243
753 2405 4776 13398 3390 4775 23270 3240 13404 1875 1933 744 15641 1079
754 32387 26887 4198 26593 26883 4200 4194 26586 10665 23148 33568 25396 35829 8931 21511 18623 13856 13007 18624 15788 13860 13858 21510 13015 13861 18057 13857 13006 21318 13005 8133 3591 19379 18702
755 12994 32110 26113
756 1186 1697 1185 6105 2595 34915 17231 6333
757 7903 2405 13574 11751 32409 12631 34598 13480 1504 5432
758 1561 26158 316 2306 5532 10587
759 10542 10791 10544 11316 5538 5455 10783 9985 10558
760 40789 12369 40205 38831 40243 38621
761 25856 26662 19661
762 3322 8143 870
763 33050 13565 32593
764 8287 37527 16321 1237 28441 4601 19626 1336 5153 38060
765 31490 38426 19806 36978 2699 16768 5111 9660 5114 16277 29450 34678 642 35001 4623
766 19539 29545 20847 19547
767 27149 12523 11719 19673 11929 15284 11002 11350 15036 8266 3191 10694 24940 40611 11847 8183 2971 9004
768 18957 15804 10650 18947 20951 4202 3954 14603 2525 3849 3920 1897 1893 34486 12537 36592 3216 20214 4338 12693 39353 600
769 25514 6219 10069 30798 13074
770 12285 35907 6976 15555 37692 27793 17012 21035 18756 13915 18570 18667 8728 13904 1468 8060 6947 8773 6029 12150 458 33840 6630 547
771 7136 13757 20225 20187 36979
772 141 4294
773 6511 1718 1910 22047 6520 13966 8252 1717 4900
774 16272 21717 17229 20185 33359 14663 4430 21727 141 35865 18704 17738 22756 25628 39673
775 27888 19122 19661 19001 30566 31932 18998
776 19669 34427 31240 6982
777 8912 15780 8011 38799 16145
778 2525 572 571 1772 1933 36380 1076 1851 1853 934 870 683 684 685 686 681 1758 543 2923
779 3978 10042 32290 4079 25517 3386 3979 6666 1722 3847 11558 3980
780 10815 14406 13697 23600
781 26517 36735 18493 2736 35713
782 6423 1609 5545 3189 3190 30500 13657 5533 11800 20023 6624 309 2318 5402 36456 1553 301 5561 5190 718 38687 18621
783 14593 37867 11278 11434 18870 3719 21846 5530
784 1538 627 14443 27768 18336
785 642 16586 16183
786 12089 3182 17763 7920 9754 7703 12239 29946 7734 16178 12240 7697 17811 10466 7572 11864 16228 7735 9759 10459
787 5685 17585 12637 20464 20466 20467 6081 1500 17201 12636 12624 256 257 258 1513 1526 8555 20468 15013 32176 1537 18444 20471 12440 5079 6121 4946 4980 20416 11037 5030 5250 5251 2337 25806 1811 13588 20469 25780 10067 8346 5452 4949 18464 4958 37852 15263 4959 4961 20452 22299 12000 19541 4939 40604 35509 5242 3543 28109 4951 23078 10820 4950 3549 20447 718 18067 33921 18063
788 10805 15588 18136
789 2372 7872 20615
790 12533 20157 4048 4049 12615 3380 18673 11771 7938 1963 9433 470 14604 3120 12080 23849 23084
791 23782 19019 10830 3292 20075 11938 38855 1217 16304 6121 20469 22290 2971 3191
792 5952 5959 14100 5926 37422
793 12621 38890 8446 2525
794 792 6650 1029
795 953 35913 24939 2965 29094 29902 8255 1086 32941 959
796 5604 22787 30854 14391 5587
797 7131 2843 14347
798 31970 27155 31726 13617 7994 283 28841
799 9748 10461 30890 7679 1811 9755 9795 14655 978 7725 10460 3464 4516 370 187 189 553 814 8326 293 306 3183 7713
800 141 17512 13937
801 237 1811 6037 1227 1636 5711 4452 128 20003 2627 11308 417 184 38857 12665 11121 1262 2624 160 11027 1263 2468 1183 8258
802 35241 262 247 5438 5439 7427 7426 4317 7305
803 10366 18141 31262 18261 692 1207 22823 7367 557
804 28111 13565 4677
805 35170 714 461 13112 3610 19745 3607
806 507 12605 1169 1168 1023 12519 21686 34825 17196 17197 31737 12497
807 17031 5452 11994
808 20870 25858 20860 17991 19290
809 26009 2365 11968 16823 9332 19482 2926 880
810 36235 3283 17463 14751 3287 17473 2266 1624 4843 2249 16393 805 13130 307 2461 8157 2343 1811 30510 835 674 141 4657 4519
811 18634 11730 11731 20498
812 2266 6387 194 1352 1593 3109 33961 205 20247 10383 529 6581 6582 2323 37558 1430 11704 9650 15023 11693 198 40026 6636 10398 10338 34345 15907 4623 2291 2568 6631 39577 1564 31368 4519 19775 3099 18145 368 2319 6632 1795
813 3276 17030 11045 28112 1264 978
814 10789 10843 10931
815 9483 8227 10099 2203
816 10847 5505 3746 5463 5527 18238 11409 10527 11238 10893 2363 283 11655 27609 11665 11652 10787 1811 17532 10700 10726 11220 11429 3162 7723 23266 2662 2825 2685 17778 7257 17819 12611 12289 2773 2839 14351 642 6423 2203 17557
817 160 642 32995 2736 16249
818 3871 7951 696 13573 2929 11099 11757 3880 20409 4160 1712 991 4046 2492 650 1811 681 7486 16615 722 10598 2525 5172 2220
819 6047 28759 3190 15563 1538 17667
820 11912 11566 628 14412
821 3012 13708 978 21309
822 32662 12124 4793 4786 18558 4765 4220 23254 20666 2001 822
823 14685 12241 19406 6753 20777 13644 15197 11400 10119 10926 10108 28428 11277 10788 39680
824 28146 283 1061 9316 15293 25811 18478 189 38904 1795 2319 2324 559 15753 23794 9314 4434 18589 837 14659 965 2999 4089 9264 9269 2993 19270 7459 8147 13953 1843 26001 18773 3376 1041 6475 146 2977 39367 15106 24320 8235 672 628 20210 15463 28531 3397 714 6664 19619 1739 564 14453 8128 598 839 2396 3951 20127 18876 2982 18479 2375 459 2667 3199 3310 21301 1052 1050 461 8269 8336 21688 1023 18531 1101 14444 9775 2525 4091 9730 460 2923 3367 9347 8305 680 8262 4082 20883 561
825 20770 13764 10547 5503 5553 10551
826 10735 17549 10554
827 19802 7156
828 1730 1755 2525 18772 14393 7725 30832
829 12328 7874 15121 3288 30641 3261 141 2337 1800
830 15142 13870 4561
831 21852 18521 34683 20926 19008 20954 33969 25405 12521 21652 30776 30777 8095 19040 8715 19039 32552 19032 8704 35253 21382 26234 21386 32546 20845 38047 30087 32321 37086 34679 8712 8706 26002 20844 20847
832 559 6630 2252 13326 5582 3192 15455 437 30919 8890
833 17350 6734 12646 29450
834 13408 37155
835 5478 11666 5471
836 9095 5759 5067 333 340 332 2290 6258 24752 30784 34256 11652 38434 6568 18155 4499 6347 392 394 5839 422 337 5840 3506 5149 5815 5814 14486 6569 15939 6184 6172 8952 9115 6427 3453 5761 4468 3637 1128 3646 39628 1127 6171 6182 30403 28405 6555
837 6624 14175 22702 3522 16518 6980
838 11077 20313 2525 1287
839 31692 3993 3367 3397
840 6238 4534 2499 40541 642 1625 2599 5700 39479 6111 7691 129 160 1537 1529 7120 11837 9467 24591 17214 26944 28987 2643 2616 8218 23950 22078 2574 128 3713 1127 1128 6184 1131 22066 1631 1257 3697 212 8163 228
841 22341 29269 4242 14047 17703 4888 1743 2525 14980 15024 2337 17885 28096 34891 29681 14003 14041
842 10861 20914 21442 21280 15696 16118 2799 4430 3154 25475
843 917 4104 2941
844 19121 36603 35468 31723
845 12402 17643 21864 22921 40720 34272 27565
846 28978 31691 1758 5362
847 24591 1504 1513
848 4344 15261 1060 543 38603 17497
849 158 14736 14738 4702 33902
850 16300 19194 2525 718 3549 11934
851 23813 23453 575
852 3304 8328 6814 559 1285 20162 2533 8968 16917 20650 17856 6733 1314 8394 17309 5435 17375 21563 40261 12634 1500 266 246 36426 7472 722 8906 36419
853 7743 13808 34500 7118 20992 34676 14832 15059 722 13719 9543 5362 11747 895 34100 17498 19661 19103 6983 19005 26662 39853 31717 30464 19657 28173 19120 16736 25867 17575 19653 1165
854 10123 13765 10150 10891 10120 5502 10551
855 37594 19151 1937
856 4545 7850 7853 5603 37848 4871 7994 7410 35762 4506
857 546 5381 10326 4623 1613 3469 5423
858 12003 978
859 14315 141 2635 2406 6504 12594 8332 3887 1712 20128 2280 12736 6689 6456
860 9981 13087 11400 11426 10904 19428 5553 5543 15200 11433 15544 18826 10787 15545 11800 11220 11429 10726 10730 20786 18238 11282 10211 5455 19427 11819 36613 10925 11289 11418 5487 10533 10090 39783 11279 5541 10923 16767 575 23813 27976 20030 5551 10569 39043 10791 10843 5529 11395 10927 10291 10788 10102
861 11671 10649 38101 11672 13021
862 12802 19793 1627 23142
863 38944 16928 1629 1355 2000 1356 35737 830 9310 39408 8366 9213 8962 828 824 15537 32196 5511 15052 31854 18333 29417 13498 2019 11652 2597 14293 13751 36835 547 10304 39859 10247 5769 39879 12266 14238 6616 309 15990 9948 1618 14297 14187 13791 39657 2526 20037 39230 14189 38536 1128 6184 39622 6171 1674 1452 14278 8684 14214 546
864 29127 29232 3078
865 10735 10533 10569 17549 11197 10291 10173 13055
866 638 16771 33060 38571 5101 33058 21268 33061 12732 16078 19430 33059 16768 16251 18340 18107 9190 12612 5748 2770 23623 18341 33844 18582 39658 32438 2699 641 7171 7211 7245 7230 7210 7266 36812 7287 7247 7280 7279 14347 7157 32043 17453 12290 16774 14353 16591 7244 2763 2764 2692 18108 5747 2701 20832 4554 34808 17934 37529 17942 2732 14367 35846 14377 7272 5750 25458 16754 2862 2757 2659 2872 32526 39533 23579 16597 7290 2874 17444 17825 2691 5083 2866 34807 2843 2804 2861 34810 2830 4341 33804 16777 16588 28132 3126 37156 14382 5104 13539 2827 39778 2875 13757 19028 2730 7242 7128 7146 30960
867 9873 30576 20914 7865 4879 3154 14473
868 10615 656 992 18897 12062 12066
869 14873 24856 14872 10524 3589 24013 506 164 36555 30484 26567 27978 35400 18305 32992 26934 26933 35031 26867 24380 33234 28005 33237 32267 28003 32791 32792 33236 28004 22107 13958 30518 25688 32790 30515 10472 23454 30507 30514 33474 24799 24800 24809 24803 24805 24845 24808 24798 25795 35418 13964 22111 22110 22109 20949 23805 31008 23808
870 2628 33283 3456 5624 1145 16461 19595 4473 3441 22822 2673 20175 6704 6701 2526 6372 9348 6340 5147 6303 33849 1189 6231 6367 3621 28386 37719 9840 33484 422 6263 340 333 1126 3714 29655 6315 6258 11652 2597 2598 129 3480 5211 34601 36984 32909 26820 28154 21032 6426 6282 39509 28392 9843 7075 4477 19570 4499 9138 31190
871 2525 30622 6824 4162 10019 4168 36626 2635 39879 402 40949 2251 15991 12437 3021 12182 10797 3092 39677 3044 3768 559 3294 4914 2466 403 7387 620 19376 2071 5682 301 4524 12184 194 35008 3026 774 722 12998 27181
872 16644 1708
873 35541 12333 34138 7324 33959 34140 36408 36264
874 4065 4071 25809 16670 18441 16035 3973 13573 1906 4057 9329 38353 4149 6838 4783 18681 8905 22330 14724 11094 3957 2405 25401 4350 9441 19619
875 20517 34093 20518 28940 39259 22811 13661 22818 39680 39702 6188 9391
876 11675 33721 32650
877 11008 4296 7308 31855 39652 6025 12950 35115 7325 7317 11646 36746 3062 12940
878 15923 3052 4570 14235 780 176 4657 7353 8597 2247 2474 6946 5404 38111
879 14051 5595 21429
880 28982 23417 3154 4409 8890 14648 18820 16190 5398 9639 6370
881 7041 9463 14658 7018 9659 18490 18491 15909 7031 13781 40825 13414
882 18336 20866 704
883 12928 16374 29703 13234
884 18055 16683 18053
885 10939 4362 10707
886 8612 5382 204 10313 2136 2360 176 3079 38005 372 6647 307 2159 805 3421 5763 3056 28627 9492 6635 10230 2362 2124 194 3071 2247 8884
887 5236 10082 35509 17651 25786 3553 18464 2923 1051 34980 19515 3375 14444 3533 9264 16187 40290 8334 10617 11591 39353 1061 14456 680 8257 2635
888 7699 837 2018
889 6778 16857 15334 8415 8416 4785 3609 17862 33794 7862 7877
890 5551 2173 1307 4482
891 23845 16006 837 36013 28456 15754 15744 36999 2019 37082 7209 9235 28457 9309
892 33054 5112 33076 4430 7734 16181 7716
893 13594 7417 2673 21270 9391 19987 18760
894 13222 2337 29922 32199 9181
895 8528 31571 8371 30858
896 461 7949 917 4344 14925 466 1717 650 2397 733 13168 25934 4128 1966 18353 18355
897 571 2408 31975 8142 3918 2969 3846 3132 1764 1849 11695 4079 20707 6520 1037 3849 8335 2278 4104 36941 7907 10955 7835 2337 593 39551 2042 20884 14024 2526 4649 2252 766 301 2343 9852 559 8315 628 35266 868 586 3328 1925 16025 3152 12591 2944 35428 3933 722 4289 2525 838 1726 3980 14608 3955 1843 16035 32287 7953 3895 2382 13444 3919 1755 2676 8274
898 31572 36012 34888 30083 20118 14975 18184 23846 15458 38330
899 1023 27346 10761 10942 10849 10586
900 4094 8257 18042
901 31368 6581 27359 3019 9647 6648 9604 20696 38111 2483 26157 13669
902 17272 203 559 2964
903 685 686 1843 688 4040 4042 15269 6674 14605 13197 4049 11509 691 8261 27020 18682 15465 30347 19491 3015 22023 30346 12331 15117 6681 6851 1878 4344 461 23143 713 714 4085 6482 11770 20130 32152 9714 4220 7457 7831 160 13090 10667 6164 14949 20274 9496 1200 18615 26728 6367 7444 9160 16471 29569 28409 6294 34208 1301 11728 8246 8209 1167 2178 18918 1226 2520 11176 5676 226 2180 4550 4503 2440 10169 1219 2618 9260 2540 14302 6365 5296 14834 23956 1198 385 213 9076 9078 425 131 6298 30407 17812 12088 7727 7920 17916 12253 18604 19319 7725 23361 6336 20100 10170 25224 1811 7712 7720 9050 6288 1184 12462 30769 15032 837 40663 6254 1125 20835 33028 1140 3714 1224 6184 1128 1127 3655
904 2068 325 323 303 6127 20956 14951 19411 1242 30969 1023 160
905 5174 4994 3820 34117 21561 5370 12478 19286 12476 8410 5430 1509 1511 5206 1502 1277 17175 39163 28084 20981 1508 1504 256 22858 17391 5200 7120 1526 257 258 1513 5198 17110 39319 5188 13512 12487 12492 12488 1520 17092 1537 51 26722 36255 29250 39897 33936 4190 26725 38011 33939 33941 33940 26723 40948 39893
906 16518 8095 38047 980 559 623 13331 34822 34821 33824
907 4004 1923 11527 1897 4075 654 2380 2383
908 16419 21420 14809 14810 21418 16440 29367 40870 29368 21010 35677 27894
909 2525 19554 2337 10040
910 7989 456 19311
911 2958 1072 4044 2952 33506 2492 12580 39280 36057 13722
912 31933 10627 26100 25663 24515 17614 10623 20123
913 266 246 269
914 14312 28115 575 5172 38422 8449 31259 33344 1314 14807 1284 3813
915 18348 669 2383
916 32331 11652 5678 34600 20791
917 4577 12177 5775
918 7185 3261 33787 7272 31506 14380 7234 18256 5104
919 14904 18358
920 13763 10923 20773 22861 2201 13053 11233 10900 20783 5487 10742
921 159 9339 9333 34962 27768 15214 8128 35973 14451 12740 18773 16238 18528 1084 15679 19498 667 16355 817 35653 6053 19751 22022 8305
922 17408 33938 26725
923 22299 4965 18467 12730 7912 2337 19276 25806 12444 1811 35502 718 13588 25813 25812 13075 23050 19267 12445 10066 19201 33523 32883 33071 18465 18091 5452 30531 19181 4939 4946 6121 4962 40874 4936 18464 19042 23078 18079 19197 39362 30797 10067 37851 4984 23045 4986 40604 35666 18101 15263 19217 4963 18081 19541 9475 10081 19255 19233 4959 12440 39903 4948 37852 33921 18063 39461 4949 22300 4955 28109 25775 10820 4950 26025 5079 22296 23071 4958 18083 13071 4944 9478 19259 5242 20139 25892 19190
924 18802 39553 12727 51 12509 1023 15297 1811 141 2337 10875 18356 29703 16846 29269 29115 13220
925 160 22849 19428 5063 40523 5539 10722 11234 10904 10149 10941 5524 10787
926 36727 31485 19681 30081 26198 24381 19890
927 2687 7276 978 20314 18810 32613 18791 19391 18812 40906 21644
928 3947 3131 2525 7919 4195 624 9924 7256 2968
929 15871 1724 11554 11555 16554 3316 4020
930 13666 9821 9293 38576 7419 25995 14181 23963 3092 23990 14128 529 15384 7378 14149 1614 9636 197 11339 6372 4623 14245 18406 556 7091 1352 559 39142 38562 14141 5615 2323 14213 5769 2526
931 2887 2249 814 192 6446
932 23403 25853 23402 19670 9918 34533
933 5950 978 8183 10694
934 9920 16198 15281 15152
935 558 38724 437 805 5887 17063 7393 7362 8790 397 1553 13822 13160 5422 176 6375 2219 2212 9811 11607 2220 559 13825 3192 33901 1776 316 620 11164 6812 8295 2117 11699 1563 14230 10255 3792 477 7383 3106 8582 15522 3024 12185 3022 3736 11694 3787 35595 39229 5423 40976 401 197 16986 2466
936 1402 1256 1125 6347 5798 422
937 8719 21387 8029
938 305 306
939 1811 20441 6037 20440 20141
940 6789 6794 8095 9163 28448 3879 2938 5136 4222 566 12577 1707 13433 6750 15078 141 3191 12574 15511 20210 4003 15463 3218 2007 4794 10856 3154 837 2365 35090 4545 2525 1169
941 1730 4060 880
942 15683 9296 11129 1031 19078 8942 3601 49 17621 8906 12841 15687 1500 5430 258 12499 276 5181 13930 722 946 942 2525 35897 32155 17167 26221 37688 26731 136 37987 8272 8273 9914
943 17758 2702 22048 2365 32624
944 1023 13275 9163 10689 1538 26893 30413 29212 30416
945 16758 5081 7183
946 9203 5507 5510 34732 20604 33399 9226 33932 30366 35808 36009 15535 9208 33890 34738 9197 18281 18770 33914 9235 36013
947 20411 888 3986 10601 4174 3378 1708 6838 1739
948 10923 5486 10161 11256 10164 10127 11398
949 31801 23409 21370
950 38026 20749 20733 25381 21122 25646 30210
951 39618 28091 39363 24005 13565 28111
952 10356 4648 798 16500 8583 5888 2263 8657 13889 11378 3732 4622 10259 9930 16488 16487 16489 4623 16495 3072 16393 16391 2460 9852 16392 14284 30790 7372 3081 16981 28628 14176 30716 12540 39302 28339 5616 13140 8637 3022 8805 1553 12268 6973
953 12260 2525 15013 176
954 28562 10430 25374 15106 29662
955 22842 27852 29842 37018 38614 21543 21163 27958 21158 25381 40602 30210
956 15975 35287 36659 26263 20491
957 619 559 6149 1352 2203 13657 21108 13644 11281 5471 23591 36432 13765 21217 10121 13764 19448 5462 28001 11245 10950 10221 11266 5450 21042 10128 13763
958 10942 10588 11800 5528 11818 9240 10925 2363 29572 575 3191 5538 10833 6753 10893 10729 10184 11422 18907 10215 10761 2203 7405 39883 15322 2662 160 10787 10716 10843 13077 5216 5455 3728 3634 9124 15379 2180 10535 17414 8710 13710 6423 10791
959 9435 16050 9997 3534 31977 14429 11615 1017 1021 14430 5287 1015 3565 32443 1023 12519 23133 10685 30296 32675 23131 23132
960 19007 21377 19006 19669 21376 20541 22807 7546 21287 30477 23400
961 21567 6061 14460
962 4341 19145 2782 19557
963 3754 1635 6102 33030 3638 180
964 4575 3094 1571 1616 12301 4610 4565 1445 11694 3765 2251 12179 38679 1553
965 1000 2533 822 15218 21969
966 3212 8095 19524 19040 6818 21387 6795 6793 6792 6794 19545 8702 33618 19551 19539 30776
967 39184 13801 16986 206 1209 27776 293 2289 404 242 13476 16682 12652 8481 31964 8482 19699 14808 1682 40047 34482 35909 40881 6641 33354 11369
968 25470 5582
969 3329 1897 876 4006 3386 3909 888 3846
970 16620 16356 8253 1722 25874 15070 8340 2365 2357 2372 12699 4205 1717 35250 16344 15643 19139 19137 12590 14732 16549 15218 3954 473 1040 40290 20409 2525 2944 881 11532 39756 1750 6857 707 32290 15274 882 6665 39910 1739 16361 1925 2934 590 11476 1030 11757 20294 650 671 1959 38109 917 12705 4159 11519 15464 35102 13201 628 14761 30901 28147 30829 1755 18673 2380 15311 3973 3250 14511 18694
971 24096 19109 15355 51 300 192 18056
972 3294 4048 11509 9456 26199 17028 13720 18616
973 13915 11386 14260 805 370 3052 5422 10394 12306 31667 33524 36842 15904 438 21039 2136 16393
974 20110 4786 8414 4829 12044 12045 954 953 34485 2662 3617 2635 3607
975 17328 14160 8887 1644 2554 1242
976 23377 19545
977 23418 5211 22693
978 15181 28354 38274 26195 36946 15187 38277 7604 12457 30876 721 7605 13106 13372 17693 26258
979 18623 15355 3591
980 26008 25997 12521 7345 32657
981 11323 12599 1668 15441 2540 30993 9247 8043 21040 9257 15956 1638 6329 39097 1229 14495 1307 18264 23955 8959 1128 1127 6171 6172 6170 6173 6174 6182 6175 6176 3655 39623 6731 39630 6181 3647 381 3637 3711 39631 39636 6180 6184 6178 3658 1672 1302 31969 25202 21041 2229 6919 1152
982 34676 17107 27382 6081 13664 5430 15291 36825 17310 12620 19226 718 2203 10734 10931 15548 20780 10139 11394 15545 9241 17413 10722 13657 17167 21010 35677 21011 12256 27894 21012 26221 2337
983 4818 6757 4829 26579
984 15409 10324 15418 6624 2258 13915 33342 3028 23777 4519 8775 192 1207 3051 3300 5578 31924 9393 20904 15890 620 13324 14139 21069 3105
985 6181 6172 1127 6179 6175 6182 6178 6173 6180 6170 6177 6174 6184 6171 3655 6176 5612 2523 2174 39625 5173 160 2481 1322 1302 2489 6200
986 9523 3265 18329 1417 4425 7417 4598 14332 9375
987 10134 5538 10735 21184 3746 10123 16861 5041 4891 9656 10888 10128 13765 10534 11249 30543 20771
988 11197 13055 10787 10554 10215 10119 24397 10778 10777 17515 11289 3700 10176
989 8141 35933
990 8728 18545 6559
991 8881 4371 9075 5067 39027 36714 16461 3453 14482 160 2162 13335 36547 1414 34991 11229 9195 3460 9081 25221 6541 6347 9076 416 420 418 426 392 427 14493 430 431 385 432 393 429 394 18843 1665 1671 13531
992 2474 16986 11113 3105 1427 400 12514 39824 3044 3034 3087 12132 801 1571 3109 3026 3076 14516 9364 35257 33527 4629 3024 176 8890 25612 2525 8645 8299 559 837
993 21450 21461 3345 13723 21451 1650 17543 29287 13410 5112 8194 17230 2700 2773 642 1169 39641 10495 9768 31882 19884 34799 1165
994 17747 10843
995 5532 11240 14801 718 2203 10091 5561 16992 12452 5486 5470 5538 11202 10547 18234 11284 13645 5560
996 192 1779
997 26737 1739 1772 13375 11696 3328 6525
998 21913 22127 24912 8849 25044 34175 25251 27078 27077 21896 28263 35391 21579 27735 22408 22615 22578 40962 21948 31524
999 11296 10925 10731 10947 2201 11245 5448
1000 22043 1294 15443 15951 1697 1147 6093 22342 8970 1305 22083 27338 26016 1180 12097 9160 4511 4294 28018 263 18319
1001 7550 32601 9921 12374
1002 8580 12304 6087 623 13915 3769 34865
1003 11403 10945 10583 11402 21233 21224 10537 5486 20771 1806 5189 33008 13608 5457 10702 15546 5538
1004 4910 16382 16564 28488 25806 2337 160 6360 17754 10904 20402 36432 10204 21211 10714 10787 11245 13765 5541
1005 10841 13610 10851 11206 20772 10897 10788 11403 11404
1006 40477 5487 18874 21216 10713 11237
1007 10787 11250 10574 10575 10540 10719 10572 11263 10571 20781 21846 1807 23744 23338 11391
1008 1546 3581 9999 8266 11880 6856
1009 2854 2773 2871 16037 4946 718 15478 10423 2838 15873 2751 12611 2737 2807 7283 2713 17779 2804 642 25992 32945 10429 25993 23284 628 31985 32944 18860 3615
1010 4198 36928 26592 26887 28601 12340 33459
1011 10843 13062 13944 5532 1806 21022
1012 7896 39808 28370
1013 262 9573 9574 7305 9576 4332 7322
1014 30863 23816 6921 7471 3152 722 6521 30940 13597 13598 36574 287
1015 40894 12029 7620 3606
1016 26254 7983 36803 20909 20530 2128 809 2141 198 17066
1017 7640 17765 7987 17519 5026 33549
1018 31126 20823 30884
1019 114 10945 15547 10559
1020 5450 11818 5541 5534 5536 5532 5189 10852 10134 11234 10913 13098 5547 20676 10788 17232 11432 19416
1021 9326 8318 2947 40632 12017
1022 2444 5896 14081 5937
1023 2971 10830 4673 8107 16838 7495 115 6020 11352 31618 6015 107 563
1024 12987 653 1093 28538 8251 957 25873 21974 27450 9297 17422 6506 12351 9473 26009 18419
1025 1663 6268 8204 31447 1666 9710 39621
1026 620 15191 1444 7369 7398 34663 8612 6641 2464 6616
1027 1717 693 11483 18529 887 154 9432 1764 1726
1028 21505 21493 25615 13 20951 14071 36898
1029 21590 28511 21175
1030 25832 30937 40384
1031 30443 38354 21178 29050 21621 21590 24914 20683 20725 27837 23112
1032 29072 1329 5485 5553
1033 31077 32167 19669 17573 31240 29785
1034 16928 28399 837 1165 1172 4289 3211 15440 978 6859
1035 25399 20955 6818 12677 12678
1036 19038 19538 34682 25998 6817
1037 18379 18358 26772
1038 33026 26740 31619 16971 29270 13248 6922 17949 12059 36549 18183 2337 7120 13363 1493 6081 12329 26741 19511
1039 4362 13482 1546 5429
1040 5496 7994 4889 5495 26237 14640 19635 20999 12328 36740 14036 4543 14797 4910 16335 26737 36396 14041 13114
1041 2411 3116 3121
1042 2491 3322 19496
1043 6249 1352 5578 1243 12609 1261 6232 179
1044 7621 3192 160
1045 3487 10130 11433 11800 15200 19451
1046 12047 7505 6922
1047 26760 31359 13653
1048 16976 27686 14974
1049 3617 18558 38363 17765 3154 2662 39306 33905
1050 5727 31043 1650 21804 26541 28341 23563 33485 26544 35742 21839
1051 4039 14004 14503 917 751 1933 594 2525 821 3192 20143 7468 37031 7621 12028 13557 23141 17955 12035 20236 12034 17973 32540 20229 7620 30983 2337 4220 8906 8150 20890 25171 25618 25173 15791 21314 15789
1052 27883 23519 21859 25057 8849 20727 21178 22120 20744 25687 32480 27850 33812
1053 18472 14802 17213 8031 34483 24591 38802 5168 38422 30953 722 1165 13581
1054 25381 21160 20688 23120 23383 20689
1055 31802 40557 30937 35711 27272 23653 27271 30221 22163 37537 8849 31165 21342 22210 22199 23646 22219 21354 37107 22220
1056 2007 9236 2021 5508 2000 16929 2006 19796 2005 9205 12799 9305 12798 12808 12802 17040 7908 12814 12797 12803 12795 12804 12800 2001 12806 12805 12816 36084 36708 12812 2352 12811 12813 12815 834 19794 1628 39035 9230 29402 20525 5507 19793 12796 12821 12801 3222 976 27341 1996 12794 12463 837 29391 37146 36015 18590 29398 7482 5991 5974 35294 8087 33023 25985 5988 107 8374
1057 980 28655 28656 4430 2219
1058 3576 36942 5287 555 26417 15152 9250 11624 15160 38320 26362 12511 23419
1059 254 5174 9881 8401 8397 8402 5173 27407 5196 27187 5195 32373 31500 37619 13475 1285 5197
1060 7449 4910 3607
1061 1551 1023 33754 17196 17197 13293 12511 1014
1062 25638 21332 21526 21166 20735 21536 24890 21546 8849
1063 5344 25490 29860 25491 3169 3157 7695 36434 7703 26794 15048
1064 141 16296 16323 16271 16260
1065 18715 2405 571 560 9898
1066 8549 15013 21067 29076
1067 19645 34892 7797 4793 12124 14992 16321
1068 2276 2412 473
1069 498 503 501 14878 16453 5550 34062 11748 3588 36654 33997 33996
1070 4893 17975 28966 11860 7848 7856 14996 35044 4891 17946 3192 2525 7832 1650 21456 29435 40114 25422 23558 22843 29441 5718 22847 21452 5728 23556 31521 26543 11599 21088 11598 31046 21082 35742 21461 33487 23553 31044 28343 21457 21468 11600 21458 23585 21982 21075 21074 31045 21071 22846 11584 21464 23586
1071 1537 3409 5174 8439 36137 8402 12627
1072 17515 11393 5556
1073 22865 5527 10735 13082 15199 16455 21214
1074 529 408 14235 6023
1075 2651 2650 10002 16055 9990 15144
1076 30971 11070 11069
1077 14034 13993 3608
1078 36741 9201 6457 34103
1079 23293 25602 23034
1080 20742 21540 32749
1081 27559 36323 34878 26133
1082 2203 5536 15971 20772
1083 25038 24260 25564 25666 24998 21536 23885 39481 25097 27076
1084 2525 2493 1811 2661 16110 6037 28366 274 7435 1538 17484 17406 26667
1085 14451 28930 37650 11685 18419 6658 6456 9726 2989 35127 9333 19305 958 921 29091 12841 36639 36640 7934 22782 23333 954 953 12353 25613 19269 12260 30953 5430 5174 1493 1500 1502 1277 20615 15064 12998 722 17890 13205 14791 30968 10615 3356 12749 10616 957 10614 956 12831 2792 4095 1055 7458 4093 6503 4030 6502 25356 17421 15213 1065 1061 628 691 674 145 934 821 36717 11676 11679 8239 19492 2525 946 3390 23337 8252 3824 12891 4545 2635 22679 461 39756 12750 12860 3000 543
1086 1352 455 1538 39904 10689 4276 4246 2971 2220 242
1087 14861 12685 32285 4027 14466 20878 2525 8544 8013 616 4338 15370 26250 15292 571 40829 2388 3871 15494
1088 14401 10822 11460
1089 18424 29073 5541 10734 10757 2201 11800 5547 5451 10557
1090 1930 468 1843 12872 2525 4531 14110
1091 11982 14658 9461 34994 18491 35461 4430 2364 8933
1092 18318 14958 8285 12420 7975
1093 1971 3958 12597 8142 11917 17988 9345 13840 2044 863 12334 18337 1712 1958 11107 14604 23147 2525 21990 21454 18301 21987 30424 21084
1094 32361 32362 12439 13365 34465 33290 32360 39235 34466 33289 33288 4927 34464 34467 38669 37950 31614 31971 36722 13366 32358 31613 35551 4924 37949 1169 5361 30046 30047 24792 26166 20503 20498 1303 8179 35236 33029 36516 36519 36520 1396 36518 35249 1398 36517 1395 36521 2522 8204 19990 3541 35238 35248 2615 4508 3542 3621 26808 6247 2592 2593 15394 1132 15442 5661 1243 1211 8213 1323 7123 3706 6223 1631 220 9110 28151 18262 14156 7121 11030 1352 9113 1636 26805
1095 24898 21132 21541 25376
1096 20718 22121 27076 27852 21135 23399
1097 23108 35149 40955 25148
1098 27857 27856 31441 38649 34200 26244 24901 8849 35685 37640 27959 31440 24425 23614 21362 24475 21582 37108 38082 22875 28805 39589 30926 39831 24474 37123 21611
1099 21625 21612 23646 21631
1100 11260 13950 10159 5536
1101 11 50 15767 13 4698 13852
1102 13249 7778 12052 31409 12072 16931 30085 37077 12042 13557 4735 17946
1103 2525 7286 642 2365 2337
1104 36 4684 18056 16686 17633 8912 36632 15773 18816 16689 17621 8146 31445 33703 8923 13020 19763
1105 24014 8919 1878 2409 3958 15765 1726 10662 3250 10042
1106 14637 4545 2365
1107 18799 18803 18805 12456 19392 18795 19395 40906 40692 5942 30456
1108 10489 24794 31406
1109 4597 3681 2589 21305 2506 3634 5676 4504 20252 1156 3514 22065 1878 2525 32275 1288 2537 1291 4532 1183
1110 18143 13883 2256 8803 9392 12320 35137 17912
1111 30531 10080 10070 11041 18447 10082 11043 3551 19196 25897 13073 19676 17033 3549 32594 5246 23062 35501 16300 10054 5254 32883 25890 23263 6120 10060 718 36738 32337 2662 837
1112 21546 20742 21699 31688 30190 23618 21867 26098
1113 2464 8578 6204 12149 1320 17298 8482
1114 20785 837 2222
1115 128 3457 179
1116 7007 35899 4430 32104 23331 13411 14661 9678
1117 24952 11360 194 5398 4519 2315 7385 17057 12310 15522 35136 12266 23739 5423
1118 3706 1261 3734 4528 1183 216 8043 230 19326 2616 1262 1288 3697 3421 1421 3420 305 160 3741 2976 1623 1195 4532 1237
1119 8690 559 2635 2056 16623 20673 2369 30852 16661
1120 9567 40801 20842 23765 30658 17506 27237 520 10499 9523 19684 1169 51 6455 7911
1121 12186 22592 22534 22571 22618 25247 27448 22835 26492 35562 25232 22524 36391 24573 23665
1122 17406 27521 26058
1123 22731 23874 12188 28179 22879 37187 24215 29164 34159 23311 25251 21905 22369 25012 8113 15702 23914 25747 29497 24451 40648 22839 23717 25711 25186 23503 23214 26068 27654 31 30128 8914 8906 8150 27909 22719 23896 26627 26338 25000 28215 33221 40702 24310 17406 21181 37373 37748 24590 21536 40807 23234 23229 22919 24071 24255 24260 35555 22377 21859 29341 32711 25532 33628 23518 29330 22968 26626 22397 22831 24058 24293 26093 9454 40910 21933 23890 23225 23709 22387 26610 23705 23681
1124 21315 21313 31849
1125 17905 10311 32914 18669 9822 12319 2246 8632
1126 9471 36380 25374 18416 3014 837
1127 19669 25828 29737 36845
1128 8932 17772 13665 28073 22042 22035
1129 3941 654 4138
1130 4894 14998 17976 3192 141 22759 559 2263 4579 18775 18654 28631 9822 3769 6980 19770 3758 20791 2526 16494 6372 13915
1131 835 832 837 21967 1089 3195 19748 29427
1132 21877 23683 21859 23234 21126 21536 25527 21178 35964 23385 23089
1133 17547 4430 7057 3140
1134 7266 7303 24374 17817 17935 36979 16587 14883 12733 7145 7256 9185 18581 15872
1135 11754 2930 6852 473 2525 12683 722 12621 5369 12724 8151 1829 11768 13181 20056 10051 1874
1136 16948 7852 18036 27789 3606 6922 4702 16961 16960 18018 3192 141 12570 31481
1137 16724 16727 30884 17571 30886 9918 16742 16715
1138 4689 15445 15815 15838
1139 17890 1065 13374 12849 630 12841
1140 35279 33438 11803 11325 13608
1141 545 6649 192 187 8597 1465 4622 8785
1142 1811 26794 17939 12250 7709 4783 600 13847 7803 16215 20901 2649 3810 5430 571 2052 2525 2337 722
1143 40392 133 33583 25404 25649 30476 30477 30478 30447 27054 21375
1144 28465 7612 2937
1145 37199 19883 19949
1146 12314 3175 17767 38049 7573 3174 23266 7672 7576 22860 1811 2673 11744 20176
1147 22214 39873 36477 21546 22483 24990 24318 37373 23607
1148 21834 17592 21992 26543
1149 1811 10897 30854
1150 25934 920 14697 2525 4403 26943
1151 17313 13858 18625
1152 5582 2203 18237 15195 10702 5505 11432 28428 13645 22861 16455
1153 8496 10575 1537
1154 17866 1947 20900
1155 12442 22869 4703
1156 11417 23591 5549 20250 2203 13657 11432 13063 10152 15200 11265 16455 10554 20402 10163 13052 10130 11411 10132 5531 13645 18824 10164 13763 20242 10207
1157 708 19290 5510 32630 6684
1158 1502 16441 29258 4294 8534
1159 28560 14637 18309 12960 21683 4740 14044 12916 26873 26737 13987
1160 21696 24548 21926 22366 21126 22442 22387 22625 24716 25304 23195 26670 31684 25315 27485 22375 8843 22667 24164 22491 25704 28186 22361 31120 25046 23212 23214 24542 27952 22436 24979 32918 24136 22531 22562 29810 22446 26352 23910 24079 26078 29109 21154 23039 8852 24588 24157 23154 25582
1161 38566 22642 30934 23297
1162 20727 27310 23297 20752 20689
1163 17580 7546 20813
1164 19295 5065 11932 18451 38736 5223 22294 19185 30072 32553 35330 39461 35662 11037 40611 35665 19191 40915 10820 12010 36915 35323 19284 10088 718 51 2363 6998 4962 35322 18068 11855 6361 13215 18448 35509 40270 160 11879 29124 2624 6237 37972 1233 40011 30847 1352 2222 16819 37974 11998 11995 2971 13708 2311 2312 11458 3012 8095 5254 4958 22296 35501 10057 20457 19180 38328 35664
1165 466 3120 12992 14634 4160 1741 24364 7745 714 3920 32022 9343 862 3838 23849
1166 25435 29051 25376 22837 28512 21352 30231 30207 36871 4202 21873 22187 34848
1167 8849 21590 25589 28525
1168 4598 36811 10247 316 15422 2526 14215 546 33678 621 10365 12036 18038 20143 31508 37717 12044 12033 30849 17962
1169 11133 39367 466 8332 1726 2525 21437 464 1925 1820 681 1938 3901 20053 11475
1170 8920 48 21486 36309 20951 40811 11
1171 31083 27552 23874 28168
1172 4419 19600 6423 9578 247 266
1173 8013 10662 40886 17877 17579 28171
1174 22499 21905 38085 28209 23902 25523 23505 26670 24708 24724 23853 22890 25116 28263 17406 23715 25157 33693 25574 23712 25683 24626 24294 22497 24696
1175 19060 37772 3759
1176 13855 26146 8133
1177 6356 2613 28542 36988 31787 3790 28385 2561 5352 31457 9501 7558 16165
1178 18284 33280 12761 9312 4170 978 1169 2525
1179 6207 1797 9914 19653
1180 26736 26735 17970 13356 7667 26734 7576 7672 3164 3155 3175 9789 3144 7654 7730 7669 28599 6189
1181 8867 8866
1182 978 23165 10694 11854 15603 6521 13597
1183 5596 7263 7464 13411 16291 14663 5112 28656 6839 12264
1184 31611 7335 13690 18471 30075
1185 33069 32943 16245 15119 34487 15481 33063 15648 14852 3614 15479
1186 818 597 2391 1965 3316 731 2944 18343 11554 28422 16618 12592 11557 1869 1876
1187 8503 6011 7497 2220 35244
1188 38975 11967 33339
1189 18072 4964 18458 4956 18059 5256 30615 16992 17237 17232 718
1190 12188 25127 24070 25106 21536 23665 10877 22602 40978 23896 22651
1191 714 465 628 1067 1933 8317 9720 40474 2792 36380 23246 7458 3375 3899 693 17998 10417 1843 33505 40473 917 13570 7490 12702 7745 16614 870 4030 20409 598 2635 4430 34788
1192 20770 11390 5448
1193 38293 23697 21623 29858 25377 10879 28169 24894 32307 38743 23665
1194 14874 160 1248 4390 4552 6253 33619 2432 9015 3637 382 1198 2195 39005 1203 1204 3488 20017 1183 24950 2337
1195 36690 25769 29641 18684 19536
1196 31231 1868 13455 9298 12868 865 15663 15460 33504 23276
1197 21577 20749 21865 37019 27271 8845 22831 22578 22719 23610 21158
1198 26294 20810 28165
1199 21167 21948 22196
1200 36632 13005 4685 18056 20951
1201 4001 2525 34904 36611 26309 28165 36215 19004
1202 1355 9165 26039 4794 31890 2673 283 29213 30593 20395
1203 20475 6190 20165 15316 37595 6187
1204 3946 3823 12535
1205 14431 1019 34125 26424 1023 14423 3570 23129 23127 3574 26418 1022 18505 39269 21690 30991 5287
1206 21389 33508 19534
1207 17745 1459 40325 9848 9864 7977 21664 2435 7765 3782 13639
1208 10897 10924 5527 23338 17412 21234 10742 11393 17411 11246 11402 5532 10583 9239 10580 40377 17409 23744 10735 10832 9986 21225 13944 10845 33594 10784
1209 34287 13346 30491 26559
1210 21108 11239 5553 13765 11233 15544 20776 13061 13763 10127 10215 10134 9240 12452 10153 18826 36432 11666 10923 20676 5501 10843 13645 25940 36433 10527 5473 5475 20250 11450 11245 10123 13764 10533 32529 11400 5478 5449 11651 5503 5450
1211 21665 18211 2432 36061 8577 6652 356 8697 9701 26793 12538 10225 14281 15900 28947 10226 18756 32225 10227 18763 6444 3732 1207 20906 9293 33342 15429 18649 1352 1647 10754 37974 12275 23236 2363 559 8690 8655 2263 1553 38111 6625 31754 2526
1212 4519 8691 33881 20518 8773 13142 20079 13915 22818 24764 783
1213 23225 36883 24702 22387 22406 29533 26378 10882 26699 25337 22445 24484 23853 40911 26078 34537 17406 17498 30446 26830
1214 11832 11831 14633
1215 837 15344 16776
1216 19053 7894 559 13021 15080 2525 33749 11500 16579 10608
1217 4738 1965 12878 16615 12700
1218 11528 10417 1843 933 23247 2394 4030 12877 598 4714 28923 464 594 6851 6692 141 575 51 8127 1875 4779 22753
1219 21682 5430 1484 35280 16775 25459 17788 2821 18591 19409 6539 20112 7051 34807 16766 7279 17778
1220 31657 21742 23561 10694 26545 21776 21077 3338
1221 6712 6708 11046 718 283 33950
1222 10209 11318 11314 39043 21215 5538
1223 19381 34878
1224 23372 514 19895
1225 35975 10694 11755 4289 13094 51 33933 33399 1357 8965 7206 40918 28399 35999 18589 33899 822 37870 829 36673 2019 837 1609 3012 11562
1226 10451 3614 34252 17415 7750 33327
1227 38952 34640 37098 26098 20688 20718 19657 27872 27518
1228 14586 32426 14543 32421 14531
1229 108 6016 7496 11081
1230 19802 20636 6537
1231 6007 1537 14744
1232 7309 3063 29663 26547 3062 10794 32762 32761 32760 32764 32763 11626 7307 33970 4254
1233 22639 22592 30313 33320 9920 8145 26313 22219 38778 31336 17484 21635
1234 25292 23614 21167 20689
1235 25682 28591 12190 23859 31544 32815 24969 24970 30312 38085 27994 25108 25747 33420 25015 27562 26616 21903 24993 22599 40568 25553
1236 23233 22579
1237 13900 13901 13902 9381 13915 529 17017 2323 4353 3090 2263 6624 12184 12169 12174 12150 13139 16982 17893 10252 15419 25211 25209 6968 15418 3078 16517 4565 9359 27823
1238 1425 5833
1239 11814 10784 10887 11393
1240 112 9419 3730 9413 4663 9407 34804 6005 9555 109 33256 7532 8094 110 1215 11960 24396 26566 6104 40333 9536 39285 17252 3744 18632 11159 9506 9531 14744 14312 12340 13267 9918 5172 3191 11054 5990 11255 5558
1241 1335 7099 10842 18863 17560 9984
1242 2327 3037 2347 2903 24774 6558 440 9822 15907 1571 557 4841 3304 1352 559 3092 31368 7394 18666 35225 4657 529 4519 37978 3105 12278 14255 33517 189
1243 8863 8862 17575
1244 26772 14895 38132
1245 19079 9364 14338
1246 2976 1169 23432 978 27414 977 20493 19954 24387 13347 19906
1247 17572 30447 22794
1248 12355 15212 18723 1072 2927 3000 642 30961 20831 7169 1502
1249 16643 12123 4764 675 4183 32022 11789 2283 2786
1250 30996 11512 14511 1820 3352 15475 1976 1977 1905 12709 30900 1755 7485 593 14704 15132 15073 3850 4039 1077 2390 4035 20294 25517 22050 35428 15461 9433 7489 1764 10040 153 15267 17921 3250 598 10602 4113 12870 4002 2525
1251 935 15476 11499 24602 1837 3978 8306 11530 9481 650 944 40363 25362 3250 1726 16025 1728 3951
1252 3322 8337 991 15237 6844 10602 2397 877 1937 461 19005 26312 28601 4198 136 37988 8906
1253 3120 11754 1870 7458 3252
1254 9133 9154 1363 9196 6032
1255 12069 20230 4891 7849 19643 18040 17946 18037 31508 19312
1256 7831 23085 22048 12695 2365 2372 32955 30360
1257 2360 12539 1552 4044 17291 3865 17220
1258 22644 33706 25601 24186 23540 23188 10882 25912 29509 24273 25605 27644 21920 22996 34083 27649 26452 26453 29499 29035 26451 26450 24180 24126 21536 23308 21933 27089 22383 23530
1259 26844 24408 27286 27293 38853 27241 23299 28742 26105
1260 22719 26836 36354 25683 35099
1261 4203 155 837 1095 2534 3317
1262 35239 19532 35230 35066 18521 25399 32552 7342 8723 8721 23043 19695 16814 16467 9135 9134 16457 7444 23488 1541 20503 12521 8095 21289 9498 211 33029 36516 36520 1396 36517 2522 35238 36521 35236 36519 36518 40826 1395 1398 8204 19990 35248 4508 3541 2615 3621 26808 3542 3619 3620 5830 19613 36550 28578 718 160 11736 1242 21047 15438 238 39567 39122 128
1263 20951 21475 21474 37473 18943 14783 36228
1264 6825 6605 9895 4522 39496 34116 12437 15372 8806 4581 31922 6976 13336 6029 37861 4585
1265 4451 1195 18242 6891 436 1307 9087 4371 9498 1406 340 422
1266 19536 19534 8710
1267 2124 805 11136 296 31862 311 37071 2128 3421 3228 1571 12317 2894 1594 5004 5379 529 203 12129
1268 2965 4014 9332 1896 860 7959 6843 1824 3910 1857 3925 692 17422 15251 924 2380 991 3120 2390 20859
1269 7937 3120 12706 4564 39667 14462 15624 26248 4901 4781
1270 10923 10547 10912 10551 13767
1271 5360 24859 14873 5598 501 10485 24864 18514 22264 26514 1169 26171 34303 32593 13565 34441 24360
1272 4079 2365 2773 1820 1755
1273 37720 5168 28489 28085 32310 5430
1274 13342 13958 23810
1275 1811 4039 18000 2952 20214 3243 3559 23570 839 2404 36978 628 1708 2281 36592 8323 2923 13165 36000 1843 2525 2635 1023 11108 722 5430 39353 13501 8252 12991 15007 19050 20216 2942 2276 17610
1276 2962 1726 15006 32825 34038 12707 13450
1277 25601 12190 24071 29812 28303
1278 21536 26716 22571 3410 31898
1279 23916 28067 29790 23224 31124 27963 23396 28539 2247 2097 176 2249 620 34418
1280 8133 18959
1281 23706 24979 24517 22879 23687 23712 28687
1282 36215 19004
1283 24657 23200 23201 30326 24616 32984 26494 24958 31055 26331 21923 36880 22601 29527 22535 37362 25694 24525 28231 34425 32728 27936 27164 31781 9451 31795 33249 21695 23234 30307 25007 24977 22876 24611 29806 35048 37917 24659 23225 22956 23028 23154 22376 24630 27641 34083 23713 22952 22955 32565 23023 23022 22974 27952 24542 27886 24470 31684 12188 32722 23919 26329 22592 24488 26356 36352 22446 24580 23014 35188 21905 22882 25724 28269 32723 23211 39805 38933 32562 24731 24680 24567 35494 25634 27905 26837 38971 38834 31958 23208 23209
1284 21909 22501 33696 35496 36779 38889 31950 26348 21913
1285 31517 18692 12588
1286 714 6477 8321
1287 20698 309 5962 6360 2071 26576 32614 1553 27347 13167 8294 1582 39222 440 2466
1288 25374 24949 1106 3217 17681 6460 2525 17879 11786
1289 23558 31658 21992 21798 11602 11600 21101
1290 26278 8296 176 307 1615
1291 27131 32023 14694 34793 7974 36844 36810 9858 9793 283 13620 32332
1292 26218 14056 978 20546 26768 19297 18359 7542 37504
1293 669 752 4133 3297 666 9730 13378 1027 16937 628 1029 7938 37775 3373 7946 932 988 2790 11543 12582 879 2409 3154 2525 11483 2956 4025
1294 10742 11250 11230 5447 10694 2976 6736 13549 19427 5556 11293 5530 3489 15559 978 10721 5528 10224 40523 11016 11054 10947
1295 7166 4341 5101
1296 30046 30047 26171 1168 16451 16452 26169 10498 31228 20487 9769 6696 10502
1297 18337 2032
1298 5485 15544 15552 10892 5475 11666 15549 9978 13060 15550 10164 10702
1299 1093 870 3944
1300 5557 10899 11275 10898 18779 13765 10916 30543
1301 27269 23927 27531 23343 25028 25018 27285 23352 27296
1302 21169 20689 25528 30463
1303 21694 21920 40661
1304 23308 26497 24102 24487 21903 23036 22574
1305 22919 22832 28460 34929 31820 24046 25116
1306 22562 22592 27494 17643
1307 22363 22562 21909 29806 25331 22585 32720 22385 22662 26710 21856 22546 22615 22959
1308 22717 21583 30218 37913 22218 25194 22201 29355
1309 1288 20666 1571 381 2807 2740 34088 15900
1310 31798 21924 21909 22372 23229 23543 12190 24561
1311 28244 25773 23011 25704 28276 22625 23022 23678 22919 23874 25710 26637 26373
1312 23207 38317 29315 40500 24983 29780 23297 23909 25774 37512 34442 23220 26852 27961 24965 24491 26489 30298 27712 39470 22471 26351 23311 22657 30583 21516 34177 21912 24071 22910 27624 24295 39416 31811 24115 22669 36863 12186 22882 21940 22394 25709 25913 22719 28647 29788 24235 38836 26839 23305 24260 32802 23234 38783
1313 12737 14514 2937 16364 15311
1314 4480 679 18009
1315 37594 18863
1316 12866 39874 14312 718 26530 846 4137 283 13376 40816 22859 19465 992 660 662 594 3264 744 14726 20608 1877 2525 30879 39039 25847 16425 2337 4071
1317 30638 15370 28599 1029
1318 24218 25720 24078 24273 21856 24252 24590 23016 23892 22514 22592 23214 34457 22655 24977 22365 29295 34711 23225 22900 25679 25683 21905 23005 38934 31951 25682 36193 23027 22491 34855 29534 29810 23890 24463 22385 21536 32564 26606 36189 27592 27586 32475 38910 27916 27925 32468 30325 23872 22881 24082 22996 39952 23230 22669 23721 36201 31702 27489 21913 22526 35683 38401 28297 27479 31120 31344
1319 29644 18960 32112
1320 37237 24032 22626 9452 22609 27071 26441 26626 25044 17406 26609 5283 38751
1321 3093 479 767 766 301 33528 2071 19384 33529 20836 5356 6981 2141 23159 13327 8610 4622 10797 36838 17048 20703 452 9634 19986 20517 20983 36840 9651 6578 531 15473 15901 18392 6638 5393 18652 5891 5394 10236 13669 28079 39899 6383 4579 36836 6371 8622 20702 6387 13798 18402 2510 9650 2266 20249 9626 5774 27171 529
1322 4096 18348 3522
1323 169 167 32645 39599 21736 26172 26173 24009 26177 26178 36555 493 518 10510 19712 10519 19369 10509 10492 10484 26175 10478 10481 10483 496 10505 910 22267 14881 10482 10480 5358 10512 27628 37979 26179 3808 26183 23362 32816 16222 35401 9523 28118 19937 16544 540 6143 6146 31868 6140 6141 20058 559 30880 6376 19552 9618 6145 6799 5810
1324 22133 20733 23120 33809 28067 25018 38694 9597 21342 34203 23925 23297 23618 8849 23923 20735 21169 17484 9454 23715 22129 23384
1325 19581 9399 27812 33751 19576 14296 22694 4415 4422
1326 2289 3076 27353 10447 3263 1746 10326 307 40179
1327 12728 3416 14691 6927 12177 780 14235 12513 7388 3082
1328 13112 13108 20151
1329 8172 7083 3621 1393 1298
1330 17066 19985 27760
1331 2337 861 9319 468 465 12702 4344 991 8840 3371 9317 2635 4545 14031 28980 15529 14044
1332 18734 18740 18736 18554 18402 5776
1333 17406 25116 24535 22525 37380 38401 39454 31685 40398 28256 21924 9452 22411
1334 12190 12188 24228 22433 29294 22990 31955
1335 22187 39397 24590 21181 17484 31241 30428 27718 37144
1336 22479 22896 29107 32243 24057 24712 24284 22561 27886 34951 25107 22506 22530 24188 24239 24277 25582 28265 27748 28264 28263 25186 23512 35449 24147 22633 33770 22634 24050 33561 24278
1337 24894 23344 28808 38817 22922 23096 24249
1338 22413 22880 22651 22463 21859 12190 22883 25578 22931 24105 24450 24449 24448 24444 22410 22578 22663 22401 33630 24447 22580 24130 23901 25230 23896 22530 22959 30233 22391 22409 24065 22987 23506 34695 27991 22585 25738 23519 27217 22378 24436 22369 22380 21856 29495 31813 39674 31093 39469 40860 39602 26629
1339 22719 28494 26662 24122 24459 26472 23729 25111 35821
1340 36599 22962 36953 36868 40486 9588 26778 29843 28679
1341 31891 21549 31173 30662 23384 20732 29301 28511 24910 21174 20680 21342 27106 21169
1342 20889 21317 13860
1343 25637 29886 39672
1344 24517 35681 27316 25284 21930 29826 22835
1345 23706 22719 21930 24435
1346 21496 15352 15359 21505 15353 13007 32466 31849 25617 21483 21511 25620
1347 11417 5485 21227 5449 5541 5532 6753
1348 5547 11445 10203 10224 10143 10215 5555 5470 5214
1349 21905 27217 29033 23097 23154 27042 39984 23674 24730 27218 38506 22620 25575 24921 23923 24919 22987
1350 22121 27858 21169
1351 25149 25150 22219 39672
1352 20987 15940 33295 6897 3453 36714 16461 4419 12423 14942 14944 9243 14946 14947 23774 6875 2599 4546 2229 8095 8709 8707 10687 1198 6906 8278 6032 18264 23957 1542 385 336 1342 14121 5849 160 8573 8574 6711 6712 23963 3522 2263 6624 2251 8694 38120 8700 13909 6625 8788 1594 367 5315 441 340 14500 1404 5821 383 27629 27630 4235 19033 35066 18521 21289 18169 11339 9938 35644 805 8799 7398 18402 176 8741 774 772 19834 766 767 20779 5386 301 11126 40433 14128 9348 9293 1614 14229 12140 2526 14125 14145 14281 34670 14181 322 5071 19160 26813 8215 17055 9528
1353 25280 22578 22414 22834 27093 21859 17405 24070 25041 25307 21181 25876 17406 23505 23710 23896 38841 27159
1354 23697 23887 37021 32723 22990 24273 23213 22883 37824 31094 33827 21858 29646 22884 32281 22566 26965 22671 25045 34851 25189 32970 24614 23026 23225 39295 32747 28707 21181 24979 22919 24189 8846 23709 22383 22585 25876 24637 26720 24288 28216 37543 37183 36312 24111 21172 12188 17406 26371 22433 21154 22513 33694 29789 22987 25116 25749 23902 37636 22669 24506 27217 22918 28328 25088 33584
1355 23712 24194 22830 24179 21128 23683 37357 27745 27750 25593
1356 20772 9981 10735 10702 5536 10756 21034 11230 10167 10934 5505 2203 8086 7525 718 10935 10091 13087 10787 10932 11196 17979 1811 21844 10784 10215
1357 22902 25077 22605 25677 24984 25560 27047 24260 22384 27737 26688 23519 22416
1358 4684 18055 17636 17637 18620 8939 16680
1359 21124 39684 21324 28500 20754 20744
1360 23537 22916 12190 23675 22432
1361 187 373 2324
1362 32521 15782 22797
1363 1840 1861 24371 30577 18129 12496 1019 19456 1023 2525 11765 15346 23833 16677 2355 27768 675 3558 917 6490 4231 9316 18877 11786 37240 10019 2376 14701 20404 28648 1106 12889 16118
1364 29749 21134 20687 40072
1365 19482 10029 1102 1048 598 2678 18489 18488 922 2799 14769 21977 4781 15078 16410 1082 35729 14768
1366 6058 6059 35288 15611 20398 18635
1367 18055 16678 13858
1368 12573 659 4784 16356 1066 591
1369 38800 1067 19050 9329 594 605 6677 865 3123 13170 9432 3118 6849 1933 40829 9889 26583 15080 671 882 628 13379 3974 4005 4012 5058 1869 2402 1816 1731 4036 1758 20222 1077 2380 583 1753 870 624 30347 3557 670 19129 580 4111 16111 16110 33331 18628 37434 26894
1370 2463 17178 21020 8878 6247 11137 1633 28542 3777 3456 18262 6232 3668 15389 5612 3715 8876 1307 2181 2541 2616 2454 31784 1250 2633 1623 4596 2504 2601 2554 22095 184 6111 1632 1122 1690
1371 3948 7744 821 839
1372 35349 5893 2435
1373 21981 26543 3338 23562 23550 21827 21469 30804
1374 7131 18036 18018 20233 642
1375 35708 29051 31943 21160 36619 21325
1376 10576 10847 5475 10091
1377 20873 13585 13569 673 15692 4231 2972 4906 17685 2337 10593 17890 15213 9318 29911 2635 642 7613 2736 40012 2525 2649 628 39460 12981 3385 4480
1378 721 51 8704 20840 19536 36690 16088
1379 7216 23575 2776 9656 30085 12103 16809 3192 17819 18251 642 2825 16595
1380 13413 6533 9680 8190 16283 9675 14664 29069 26205 7045 13778 14656 3403 25883 36750 7037 40429 11978 7029 20055 7047
1381 12992 1962 12718
1382 29409 30612 15405 17462 3256 3281 11851 3257
1383 10408 1581 1583 1576 3134 18656 10343 11113 2300 1207 16486
1384 5104 18113 31491 2833 2863
1385 3739 11717 2266 3784 187 37978 3028 761 10354 204 810 3043 9491 31028 559 6981 11716 197 192 2265 9657 198 2310 2483 1553 3105 201 549 4519 31368 2345 440 2473 194 11708 8684 3136 208 176 4522 805 324 205 529 2319 3099
1386 794 810 6588 6825 187 792 192 8763 559 21406
1387 722 5059 3853
1388 2380 4173 13193 1875 9924 3895
1389 22427 27016 23676
1390 27041 25162 17575 28682 28685 29502 9452 37350 22406
1391 6783 7209 2337 16846
1392 23234 8845 23663 17406 23706 31733 30839 22918 8856
1393 24281 38972 22317 23214 34184 23503 26371 23117 22495 26376 23711 40362 22669 22524 23914 21148 24080 34189 21899 28718 22883 33798 17706 1500 12478 1493 17406 22719 30253 24897 24627 30275 31798 23879 24231 24260 24448 22931 22930 22929 23310 22278 24151 40766 24077 27063 22513 24529 28303 24447
1394 2337 4220 8913 10627 36629 8906 8901 10626 15446 31
1395 21506 13857 21316 26144 13856 13859 17613 26146 4699 21489 21491 15351 25173 13851
1396 8149 21493 25657 3591 19762 10666 15804 4684 8906 10643 13855 21316 15863 20890 13858 8009 3601 31 17613 26146 8449 20980 1684 5138 1685 22245 13850
1397 7628 2908 2337 1800 18146 141 2220 19621 5325
1398 1023 3065 13042 18712 28994 1014 29628
1399 24122 31298 22369
1400 35710 23120 17484 21865 34189 39842 27522
1401 15447 48 15809 8922 15770 8941 3591 31933 20123 8133 43 25 26225 18816 3601 8918 16 49 8013
1402 24616 23521 31702 27489 29192 22521 39986 22522 35106
1403 38619 21581 35193
1404 26555 35956 29389
1405 25189 28703 27935 21536 31780 24212 32299 22949 22640 23027 21172 22363 21913 22878 27448 24185 22533 40398 22602 23512 22830 22977 25080 25523 40096 21145 28065 23876 40807 27031 22603 27494 40468 22524 29020 29296 23712 29812 22364 21154 40868 26356 39953 26860 22657 40367 27647 38593 22378 22671 33314 23500 37686 24209 23014 27206 22585 23234 23200 25039 22404 38390
1406 9421 5142 3326
1407 11588 944 2032 1883 22051 7947
1408 17480 14529 16201 20207 3419 15281
1409 132 11116 2343 306
1410 26688 27111 23687 22919 27991 22403 24436 25184 22544 7550
1411 4938 18081 4939 6364 4935 19198 4958 4956 18090 13068 12018 4955 5065 18451 5078 12730 26167 9764 26168 12439 18077 23068 11989 18454 9808 5440 20137 25887 19259 18457 33306 5254 5453 4933 6109 36254 8266 26530 18467 3011 5232 25813 18448
1412 2525 2400 1097 22005 15213 32654 14698 1772 1708 3320 3955 3925 18352 992 3846 2528 8123 12900
1413 5245 9514 39322 25887 4974 3549 9531 22015 10068 30798 27120 9533 5237 20424 18062 19236 40439 16302 18088 11039 4939
1414 9898 2214 11900
1415 7549 23406 20893 29098 19652 21284 19004 36215
1416 14297 283 4202 7408 34592 19770
1417 1780 5998 9355 410 6607 2465 372 2510 28228 8890 35641 203 35001 34998 38562
1418 16886 4167 9472 6204 18654 559
1419 391 4515 441 3629 1183 5692 128
1420 24365 3328 945 3557 4006 9445 15220 476 7961
1421 19001 21326 39640 19118 19117 23178 34970
1422 11513 15865 2938 600
1423 1755 2954 2034 1883 17514 3886 693 1764 1726 707 596 2491 2039 714 7894 821 30590 39836 9920 9918 21878 36325 30559 26880 17498 13001 40753 8132 3600 10656 31 22614 30425 17644 8906 18818 4202 17805 26138 34878 19383 26882 23592
1424 14816 6202 5703 978 14786 8939 18942
1425 7070 14677 7051 7040 25880 7050 16283
1426 19100 17579 9920 19109 17498 37093
1427 17423 10009 2797 6471
1428 4046 3963 20870 14799
1429 26840 23896 23681 22831
1430 23313 17544 17535 5111 31834 5116 7070 14677 14656 31832 9666 8195 4430 7005 3240 3264
1431 37523 29556 23060 5253 25779 13290 3544 3020 7785 5229 14423 1023 8183 2976 25785 15282 19195 20137 18127 13120 2971 11848 978 11951 11953 9812 11607 2220 35244
1432 28199 39844 32261 25588 34214 22997 39980 27725 38338 33395 24577 10883 25052 33585 17406 21536 23869
1433 14466 25400 23461 11521 2922
1434 814 4998 3047 3070 35379 4646 1437 3087
1435 13765 11284 19428 11823 5530 11233 10900 20769 5458
1436 4272 4252 32555 23087 4273
1437 17032 2971 3323 2525 4 3191
1438 7720 30832 10460 12253 2018 40918 23794 7209 35999 36826 36827 837
1439 20030 5582 5298 35920 15336 16845 5515 40872 9306 834
1440 2820 2709 26910 2852 2688 1685 38017 2849 2801 7130 23577
1441 27437 218 6098 1183 1199 2622 1128 39254
1442 30953 722 7041 40429 31834 25883 14663 4430 9261 605 1933 990 733 2525 9671 40825
1443 37499 32573 30074
1444 5973 40547 24940 11929
1445 298 32921 5008 529 14235 6023 10277 5636 2347 3094 1594 1437 1436 2319 5778 1215 1217 1352 16820 455 11352 4673 10985 7508 10976 17252 5972 563 71 7595 13716 2334 7741 12960 21953 37167 2525 141 3231 30357 160 3191 122 6010 1334 27627 23766 23765 27795 25771
1446 32944 7470 16246 3610 14035 1925 29943 837 722 2525 35996 14849 141 14889 288 21686 36585 15610 51 886 1609 14540 17482 14529 31486 8702 8095 8243 15477 15478 10421 4545 12948 3615 17866
1447 1958 11107 23147 1726 7938 13201 15239 3955 2525 38854 21990 21987 11580
1448 13376 5674 1186 30843 1810 35619 16164 7088 2557 37970 15385 6159 184 6250 15935 6098 2624 19340
1449 13512 1526 257 1524 258 256 1508 24591 32457 1493 1683 5689 1284 1492 1500 12624 5430 1277 5174 8402 1502 20376 1504 1537 9163 2337 38589
1450 27780 3192 838
1451 26471 23926 34562 28750 35496 23697 17406
1452 12596 4117 1885 35123 31475
1453 25162 25077 24072
1454 25523 27045 24115 25759 27652 23025 22639 24459 22364 23036 40599 24584 23904 32725 24306 24099 26375 28059 24138 25714 24141
1455 39583 24624 22459 22635 22640 22440 21859 29373 37809 35387 25060
1456 39048 12190 22612 22572 22658 24215 23705 28179 23311 22534 22839 29164
1457 27522 28518 28811 20729 21551 27107
1458 4684 16698 34150 13858
1459 27533 25528 39050 40007 39815 27519
1460 36512 31805 32108 13036 33255 34835
1461 22723 24037 24408 28828 23297 23348 22745 4202 23697 39712 22651 24431
1462 19007 17574 17577
1463 441 6884 4444 127
1464 37535 19383 34878 23593
1465 4684 30128 25617 21484 13008 18623 13851 13005 13860 18625 21509 13859 21508 28600
1466 19583 1405 26153 19590
1467 3471 1210
1468 29042 22364 22397 24994 22387 26369 25548 24486 29197
1469 6695 31230 909 24816 39599 21736 32645 24810 24817 24885 24876 24812 165 23365 36556 902 10512 37979 27628 24842 901 35446 36922 24841 27698 36788 24839 24833 24877 24824 24827 17023 19368 12601 24826 905 9525 35402 906 24882 24838 24820 17024 24819 24883 24879 24880 17025 908 24884 168 1169 559 38656 5809
1470 13179 18370 12588 20611
1471 15185 15187 15188 26876 36946
1472 7439 17045 239 978 2662 23290
1473 13753 19766 11660 32637 5681 19771 5445 24925 32398 32397
1474 19937 19915 23813
1475 9281 20114 6537 4429 32104 40260 14661 22329 3402 13411 17230 7012 7039 9678
1476 30806 21451 16108 11575 23586
1477 21632 8849 23683 25134
1478 35376 9845 31727 31194 31728 19576
1479 14065 14898 5869
1480 4684 8009 26114 26115 18962 32114 11672 21312 26144 21489 21508 4685 15354 8115 17613 26146 36632 15351 15359 21500 21481 21317 18623 13005 21313 15353 13851 13855 13860 21509 18625 13859 21484
1481 8703 8724 19536 23378 30776 30971 8704
1482 10128 20778 19453 11295 16455 18912 18239
1483 36708 13556 28139 1811 5582 3559 1937
1484 9314 6937 14447 941
1485 23607 21176 21152
1486 12167 4301 11012 23814 39652
1487 15538 5530 17413
1488 15790 20951 13005 13855 13851 13858 21478 21492 21317
1489 3120 12002 26006 16015
1490 36061 20178 13667 33881
1491 23050 19541 4968 18459 15589 5268 12009
1492 17689 15188 36530 13369 15177 26191
1493 16455 25940 13087 13053 5450 20777 5485
1494 8780 12273 29235 6951
1495 7550 17580 8863
1496 16763 15723 18255 25496 19845
1497 1782 369 3402
1498 37212 19861 38979 15000 7455
1499 12027 3196 4120 18417
1500 34245 33578 1624 369 2203 13386 12195 3409 12618 17337 35621 251 8476 7120 722 1551 546
1501 30960 18247 16775
1502 19109 19652 31244 30467 23402 8847 9914 30476 30477 30478 30480 30479 40557 21285
1503 786 2305 205 176 4608 559 4289 19715 16175
1504 13 31849 20890 13860 13858 18625 18056 20951 25165 17613 26146 21316 15353 4684 13005 25625 11672 10631
1505 28715 29172 10880
1506 34458 36783 34912 22532 23234 32976 22379 21948 24262 29042 24263 24622 25875 29178 27231 36185 23902 33000 25106 28269 27054 32487 22600 23705 22719 34010 24318 26381 24182 22438 25331
1507 484 32646 39269 15470
1508 16979 9863
1509 12190 23687 35477 24521 22672 36534 27504 30813 29512 27647 23234 35809 25681 12193
1510 24895 30257 34875 28659 26436 21518 29880 26446 34374 30188 40673 34251 23094 31893 30818 34190
1511 20200 23426 18505 9436 287 6985 31987 26507 3565 13273 14432 26506 4645 14428 15162 15159 37865 12525 22092
1512 26068 39053 25294 25751 21930 27168 22637 24590 34065 25571 26712 24434 23723 22585 37189 21128 10880 38144 37773 17406 27216 33630 25319 24496 22459 24996 34418 25116 24983 26048 24965 22719 39417 23911 22413 9453 22640 35050 26091 37686 29938 40840 22592 25733 23512 28179 32857 22364 22426 26958 32301
1513 2952 13450 571 2406 642
1514 15348 15349 36464 12511
1515 1998 14037 17712 7840 13987 15235 13969 34802 29689
1516 32129 4289 897 6670 26179 32832
1517 1811 2971 3144 3161 12239 16197 20485 9804 38049 17811
1518 14654 13412 7028 3399 7017 9459
1519 6713 28377 9136 9494 2421 23941
1520 6737 31899 4361
1521 4327 27758 1546 1014 15145 6985 1509 8501 18714 7313 17159 8428 3817 5142 1545 242 251 250 20615 3805
1522 8644 8579 2136 805 1611 31021 11172 35008 38562 40943 3088
1523 5734 21767 21453 7756 21836 30424
1524 3971 1867 2682 14861 13416 13399
1525 1212 160 2375 2635 1640 2554 1292 326 1169
1526 2315 450 1593 8602 2242 10349
1527 34600 32328 34601 28392
1528 25689 28103 36699 33245 35956 30490 19948 28313 31011 25688 40783 35646 13344 20898 19959 19885
1529 7627 5328 2908 31829 16318
1530 281 19052 13638
1531 1072 14793 851 2337 3263 2525 1811 628
1532 24773 18159 8289 1795 12144 33377 187 11358 20697
1533 12467 2332 17671 7872 2337 16254 2773 2687 9191 2701 16758 4560 4561 2695 5100 2659 2745 5110
1534 3907 476 2926 2917 10420 12726 974 722 20675 15514 10442 10419 25410
1535 22333 15909 13411 40260 7071 7039
1536 20914 3154 4430 6530 40260 8192 7039 25885
1537 13722 4194 36930 13270 4198 26887
1538 21693 25301 27968 24979 25162 12190 25116 24582 24079
1539 23860 23234 25877
1540 13856 28600 25623
1541 29178 22454 29315 24071 29795 31948 29197 29195 21922 32561 25116 24052 30444 22655 22669 28460 12190 22666 24172 22553
1542 4419 1811 13839 9921 31241
1543 23199 26363 35816 28323 27917 10880 21536 23697 28682 34712 24436
1544 21130 20692 28511
1545 25821 29596 30737
1546 23540 24447 24622 23673 34177 8856 25559 22903 24644 36187 17406 13272 23715 29041 29847 22409 39485 37809 24442 12190 24275 40724 23533 22426 22522 25570 23225 21858 10882 27643 25542 22513 35387 23672 23712 25569
1547 26651 4236 12955 27884 24080 24230 21126 21914 24611 22387 26597 17406 22902 21693 22364 22633 22435 25714 22409 27995 25092
1548 20321 20316 33940 20305
1549 8558 5432 1504 15058
1550 3155 7592 11835 17811 3151 36431 10942 10539 11199 17558 15544 11231 10155 10947 37459 40523 10732 17560 11270 11413 11394 9975 17565 11825 10112 37837 20266 10108 11203 10787 5536 10702 40377 10549 28001 18865 15546 10843 18826
1551 10959 8354 6003 1456 11054 11330
1552 19739 24846 2337 18186 12415 4908 8381 26922 26166 20760 19937 19442 29703 13111 18310
1553 33057 1236 5213 1806 9240 17231 27774 5558 39478 5541 28429
1554 14648 1811 14608 3947 864 597 12592
1555 9566 22360 11437 5560
1556 14888 5959 5939 5851 14091 5958 14086
1557 552 373 6125 4522 305 3420 3472 17273 4627
1558 23355 27530 39051
1559 33845 22747 14306 35115 40499 18712 32555 1538 4289 7325
1560 886 10602 461 15360 15253 9332 13379 605 28427 1843 12989 3352 628 12443 3559 5058 671 3834 30347 3557 991
1561 412 553 3777 2421 6892 1292 7122 1236 4369
1562 16246 3603 13856 13858 18057 40811
1563 8418 4825 4766 4542
1564 2412 13403 1875 2635 18066 40915 5030 718 3588 4289 924 14605 12777 2525 160
1565 1213 10956 6010 7595 5962 7482 5973 10802 6008
1566 11138 15379 5661 8216 237 1542 3671 3674 3676 1647 34127 1352 40538 3683 3675 3689 18269 25413 1223 16401 6753 19455 10766 10773 8888 18612 20985 8970 6232 1307 20972
1567 3346 26541 21084 1868
1568 24552 23212 23026 12190 34769 35180
1569 30118 30121 31678 22803
1570 23112 23102 23350 22173
1571 23154 23712 35766 22372 22879
1572 28060 25014 23036
1573 22136 29761 35985
1574 38085 24580 35053 21158 26710 23717 20680
1575 26713 22941 22434 22409 31120 24542 24643 29722 9452 40367 22536
1576 40302 7632 2337 7605 10694 978
1577 48 10647
1578 10778 10777 11428 9985 10833 10725 15192 18906
1579 12411 10684 358 8779
1580 19682 26187 23984 519 520 31485 30517 7408 16826 20030 7457 2525 3898
1581 2512 1204 10137 11410 23743
1582 14529 17020 22112
1583 35796 32388 26593 4200 35797 4198 12340 20141
1584 2469 827 7209 1356 19797 9688 5705
1585 35029 40432 16762
1586 9058 9119 9117 5762 4390
1587 16751 11912 11896 17505 13698 37079 13094 13932 11868 11905 11906
1588 35024 32677 29935 3424 3419
1589 18699 16575 28837 1744 3216 9347 9443 873 13587
1590 7209 835 830 1628 2011 17856 16904 8366 19693
1591 642 2049 2679
1592 10524 161 5360 14872 24859 24013 10508 3589 493 40564 19873 19872 509 30053 30052 40732 510 32170 19897 19902 12606 24806 19901 24802 9527 12603 19877 24800 24799 513 511 18537 18536 19363
1593 1165 19050 26044 22318 2941 283 2432
1594 2952 6751 8511 1755 3352 6694 6738 1974 605 20878 12901 2383 1760 2938 12537 820
1595 27063 23539 26371 24066 22651 33219
1596 27495 12188 34169 28279 22405 39415 21907 29520 28243 12186 22968 22404 22428 25159
1597 24054 34408 37023
1598 27663 30668 34312 38457 29472 37208 27662 29475 40185 36296 36289 29457
1599 24534 23501 29793 29183 32240 35819 35820 29794 27221 23117
1600 23869 21901 21536 23699 22572 25126 21913 31242 34447 22724 29496 12188 28461 25877 23301 24114 27891 718 937 31518 10597 744 12597 22047 13966 11915 23410 14722 29129 25583 21968 1851 11519 32404 14725 11130 12689 22021 12709 1955 11517 12691 1953 16345 12968 12967 3870 11124 1758 2396 38109 32286 1750 13500 20287 1933 20210 917 934 877 3899 628 16563 4205 16579 1046 3322 7487 20508 13574 2525 37381 23681 25080 17406 8906 26146
1601 26956 36185 25349
1602 22839 21557 17484 22719
1603 25241 28675 21905 22839 22830 22506 28179
1604 13855 8910 8913
1605 13743 21312 19 29206 25615 13005 3599 4685 13735
1606 17406 24133 22440 32063
1607 38021 18621 20374 10643
1608 27038 22623 21126 17405 24573 36643
1609 24065 21536 22459 39674 25066 22434 24070 23022 38661 24079 17405
1610 21509 13858 13861 21481 15351 13860 10637
1611 24474 24475
1612 22831 31813 29812 25107 29835 25711 27206
1613 13181 672 4041
1614 28094 718 14587
1615 6817 33620 35295
1616 22831 27967 25751
1617 7525 10998 6012 38855 16159 14649 37069 9532
1618 26550 28124 22698 9910 20385 3755 9862 3758 9878 22225 3192 283 9860 38556 9891
1619 22830 24079
1620 2203 10575 10128 11388 15195 5560 15544 13655 5450
1621 23265 17501 23266 7663 9789 3144 17970 13356 26736 7659 7672 7576 3164 3155 36435 26735 3162 7658 11835 7572 3177 12087 7768
1622 27583 24550 36890 26443 27921 23885 30364 31119 29521
1623 4579 8952 24773
1624 1294 1669 7558 1121 6879 40437 11034 2599 1128 211
1625 21067 29929 39970 17223 39193 33467 17213 35730 17734 40047 19689 14324 1273 17379 8486 1309 34481
1626 38413 2220 1020 9998 1023
1627 30253 21933 24412 39988 40035 27084 21521 23297 23210 24068 23914 21913 39145 24629 27243 31304 40006 26110 22884 37140 26359 23912 22882 34697 25285
1628 22769 16723 32579
1629 22892 30279 30310 22523 37182
1630 23916 23353 37752 21913 27161 22623 17406 17498
1631 22757 5107 12570 718 33242 21727 32508 1169 5731 1650 141 837
1632 31715 29316 38408 26105 39265 24404 28823 29852 34748 37465 30834 30192 23352 29321 28675 36601 35182 26049 27511 23350 39978 38853 24414 26640 28742 37342 39712 34022 38774 36862 36753 29222 22667 26094 40971 26370 24503 32604 24734 22654 21536 40678 40123
1633 7151 17451 7294 2880 3985 3864 4076 1917 4079 1029
1634 10003 286 285
1635 3191 1182 17754 6038 1811 2226 3717 1292 6905 1128 2673 29416 36671 829 27783 35737 35538 28399 837 2203 1352
1636 23246 8828 33376 1795 20249 9348 3077 11709 32891 6398 403 7387 2266 5015 8593 6204 36980 1603 24782 9606 31014 9615 14261 14259 12150 2255 2071 2146 6589 23734 3785 2526 3760 24786 3090 26865 8622 2903 4519 9356 13907 1582 6949 194 3736 5682 8894 2308 38055
1637 3255 18429
1638 3814 17300 20376 35436 8390 837 18224 1628 5507 2001 12815 5508 14058 33013 12261 6081 11837 1509 24362 39339 33953 39292 17302 1500 1502 5430 4994 3820 5949 1545 8388 19226 18767 36529 13107 5913 5924 36531 26775 14105 1687 1314 1492 1493 5896 20548 36532 14071 19299 36898 14062 5937 18384 3615 6521 977 29267 2525 3270 32452 21242 8426 30831 12207 8452 14329 8402 6076 17436 5951 2447 20462 9464 1504 12952 22542 8408 13600 1537 34814 1680 2670 978 39351 36525 1165
1639 3237 11773 4592 8840 12808
1640 642 15681 951 26797 12831 16238 693 1755 9296 12869 11141
1641 16498 13911 13915 33842 1428 27766 6980 13794 15418 14226 8790 14272 6372 30605 31757
1642 2207 129 128 23956 1224 19165 19212 1811 1679 18614 9242 5794 6546 36985 9123 15980
1643 27796 16321 16314
1644 9009 6012 15039 11965 7525 21295
1645 5084 8339 1052
1646 25460 29449 7232
1647 718 4157 15218 15068 27759 8337 2525 19290 32459 3920 1821 3121 1609 7262
1648 11459 10826 13931
1649 1875 13978 2373
1650 28256 24511 22514 21943
1651 18417 2273 4411
1652 1355 18630 832 828 12916 13430 34801 33279 35549 4910 14791 4813 21423 16846 5595 12203 18312 12328 4903 4545 141 5607
1653 21536 10879 22486 24576 26404 27204 27076 25033 12391 36168 35283 37276 39591 22456 24292 25683 22427 39485 26952 22409 22534 22385 24046 24219 31696 27756 25096 28688 21182 25099 31097 23193 22918 22969 22530 22615 21905 28065 23939 28277 34223 34011 23934 28323
1654 206 1320 761 176 800 11
1655 23923 26047 23108 40501 9594 28679 28815 28780 25137 34203 22875 34162 38308 21859 24400
1656 24185 25716 21856 138 26066 22590 25924
1657 22421 22625 21900 35099 23902
1658 20814 23697 35094 27066 28999 24058 24976
1659 13853 8150 24053 25773 17405 22406 24059 22918
1660 937 4478 677 10416 2525 3261 21872 21881 28234
1661 30706 38473 34274 27934 31213 40751 34222 22880 23872 27935 35492 36786 9454 27157 32473 37383 37588 38887 31803
1662 23697 21886 21147
1663 17838 40061 12291 15875
1664 29472 26997 37211 29461 10627
1665 5368 4294 2605 5161 20991 8875
1666 29530 27022 34425 23346 38593
1667 324 6372 6417 2123 1445 9401 798 559 2363 30658 23158
1668 29518 21921 22623 31083 24070
1669 21536 24509 25067 24529 22589
1670 192 6448 3382 714 5135 30574
1671 10044 9321 1909 461 991 32148 13516 18828 1108 709 1899 12355 34037 15292 11610 927 4076 20616 7948 1061 959 20405 10029 4183 947 2681 22850
1672 22522 30441 22602 40545 24081 40744 27089 22601 22632 37382 40893 36880 22553 8013 8906 23020 26701 22965 22459
1673 29468 40772 29478 40185 35773 36291 29488 29492 29469 29481 29479
1674 12927 953 36736
1675 258 257 1527 17219 17294 22327 2648 1513 1284 16780 1504 21061
1676 491 19368 488 165 12601 22348 10520 904 521 903 24796 10483 162 24858 9770 504 26939
1677 21536 26951 25234 38971 10879 33424 21948 24508 25283 33833 34430 31548
1678 3831 1746 3383
1679 4477 1204 30058 3514 6313 9028 3510 3506 3501 3481 129 3445 2478
1680 13851 13858 13861
1681 17541 5113 17228 17319 13411 13782 9661 36685 5114 9666 9667 20111 13773 10610 16404
1682 5452 34157 23072 4957 3552 4976 5245 35904 19186 20458 40439 18058 10073 5240
1683 22421 31123 21145 22990 29822
1684 12190 22644 33862 22719 27654 27580 22623 28469 22649 24968 23712 37631 29331 8845 23234 26713 22507 22413 21921 23396 24435 29330 25039 22435 39474 27973 24434
1685 463 3349 7494 29714 12690
1686 1481 1515 369 778
1687 34150 33750 15351
1688 28566 5370
1689 373 1782 369 2902 296
1690 5247 5344 40604 718 5550
1691 16893 5893 21660 5666 20195 2434 10947 19754 21216 11390 3776
1692 2887 809 296 805 775 21201 4635 10159 10735 23338 11391 10579 10095 15538 10285 21033 4598 14283 10843 10580
1693 23297 24620 24675
1694 145 18478 35837 18485 13208 958
1695 3707 2054 30958 6104 160 21963
1696 21835 21750 21788
1697 22862 18171 13768
1698 4656 16988 198 2439 15483 18213
1699 12078 1733 27455 24081 36068 718 3011 2337 35372 4242 4888 21963 15111 4904 20121 5492 32957 5604 33279 23841 14044
1700 3370 21974 2662 957
1701 2306 6806 31993 8590 35383 26539 3086 3092 28577 4519
1702 827 8366 835 32735 2019 5512 2018 13175 5519 8965
1703 2525 9264
1704 1210 1782 553 1780 412 3266 2315 559 1996
1705 27130 20851 9842 5445 8237 9909 11665 28392 34600 14220 283
1706 1437 13890 11354 32210 13323 12158 528 38679 2141 23735 3039 4622 34056 26540 534 3024 31583 12327 8799 2310 6627 7353 34658 4623 9637 5396 2510 12312 1555 34225 17011 14207 20028 3035 5399 5386 4566 4519 6645 15901 16996 2067 16098 17269 31880 40934 35000 26282 16984
1707 545 1571 201 775 4646 1210 2096 6206 192 1785 1780 553 559 3607
1708 12274 3331 2525
1709 17507 11562 9898
1710 31053 21695 21918 22410 21856
1711 38619 22127 29743 34028 20686 23118 26678 22211 29748 25380 21150 22315 22170 22169 23666 27106 21135 27107 33810 21526 35052 23618 21865 25342 20755 21159 21528 26244 28047 24912 27958 40758 28509 21149 40890 25686 24425 40443 33812
1712 22685 19003 19006
1713 26707 24070 24099
1714 22380 24529 34710 24036
1715 34384 31797 19107
1716 37621 3601
1717 26453 29499 29035 23218 37268 31952 22642 28065 22929
1718 12190 28034 26602
1719 18056 16198 29359
1720 5920 5919 26218
1721 21127 22437
1722 26407 30320 23343 9603 34747 31159 31085 24982 31105
1723 22566 23096 13021 29309 22722 28593 29107 22609 26365 15355 23858 27941 25316 28687 33538 17376 8906 27754 26377 8270
1724 23897 25057 35815 36610 38232 38231 36882 8013 8906 24985 17406 26605 26385 10877
1725 20141 4430 1027 12355 36651 9296 2635 3615
1726 36483 23108 36872 29339 31950 22387 39011 40922
1727 28047 31165 22129 30212 21151 31688 26484 26686 24542 22830 25714 25759 27018 11925 31083 23234 23182 25738 21948 20727 21526 17406 37482 24079
1728 24965 25907 24511 22657 22633 25575 23673 25106 35319 24503
1729 30314 22522 34282
1730 9481 3386 1962 4124
1731 19288 10805
1732 22894 38208 40400
1733 12111 6757 12108 3617 3618 12110 5056 4722 4770 4822 4792 4873 3609 2337 1169 36109 19909 19677
1734 722 1509 38046
1735 10882 28460 24137 23700 26632 25878 23681 26148 33863 8924 6076 3803 9465 12631
1736 10165 10575 15538 13053 10712 10556 10527 9986 11893 10756 10787 10940 10547 5486 40688
1737 10488 162 19962
1738 19880 19959 30049 24387 23455 10523 10522 14074 39493 29862 23460 24386
1739 13349 2432 11190 11189
1740 28760 11327 7586 13713 8072 34626 38855 7602 10986
1741 25430 27498 22403 21918 23709 21536 21590 38354 21121 21178 4201 30231 17484 18702
1742 28274 25055 21172 274 8942 134
1743 18315 3715 160 1288 2020 18332 5515 2555 4601 237 5683 2633 6229 5630 1128
1744 13856 25340 13006 21497 28660 13009 17589 2337 642 2750 2778 7211 3192
1745 23389 21138 8849 29345 26048 21540 22212 27276 20680 27521 21526 21324 21176 20749
1746 11862 2220 5550 39574 4331 18324 19438 29258
1747 22719 22651 24498 26839 22585 25130 40828 23109 27213 27036 23038 21172 23233 22990 22380
1748 27743 22671 29820 27588 21858 27112
1749 27534 21856 26965 22651 26472 12186
1750 25423 5728
1751 9986 10787 10725 5541
1752 323 325 307 805 306 20080 32989 30059 9364 30060 10362 10347 35459 14516 28854 6383 39899 39661
1753 7477 8905 22332 13441 13440 13438 29430 4704 18336 20605 12566 2372 559 6142 12310 6392 805 24321 6629 2526 36226 1611 8593 36458 6639 28415 6383 28860 39899 6592 33961 6387 24782 39928 305 33357 2359 35643 15884 2365
1754 6117 22289 4964 23072 33361 5226 18458 5237 12448 23263 23132 23131 981 718 6121 5452 3543 13072 13589 30322 19263 19186 5453 23074 20471 19224 5246 40083 5269 19235 5256 5030 30337 19283 6120 34498 33921 3551 3549 5079 4946 5440 5343 5344 33071 19223 20457 20469
1755 18367 20548 33013 5899
1756 6202 5000 3092 406
1757 1521 12488 3411 12626 14612 1685 15360 13112 8537 21012 26221 17167 33719
1758 7703 18598 27939 3419 11510 8252 12092 9763 3933 1917 18112 642 7736 10467 7209 17915 461 11141 11835 3615 2525 718 1811
1759 30531 18333 5515 5256 31722 39789
1760 9531 8266 22088 6440 18120 18122 23813
1761 205 2135 35642 8604
1762 12450 19252 22016 23074
1763 7283 17602 5706 1138 8260 22096
1764 718 34296 14881 513 30448 3191 25981 10995
1765 23453 1169 15180 19917 17816 10319 23455
1766 9860 38556 9897 9894 3756 9879 32020 35648 9892 27131 32019 24344
1767 3268 9491 13684 31268 14294 233 34568 5834 13685 17273 28858 2307 3024 3047 2251 34934 14235 17007 1441 2265 6204 1620 35226 4610 529 17006 13682 2308 3021 2071 3070 4370 3031 6624 8772 20852 2188
1768 1711 11515 881 1843 1029 14698
1769 12445 5338 18078 2337 10868
1770 27155 1008 38321 32442 39930 39995 642 12893 2850 7193 7138 2851
1771 1817 25398 12080 1738 566 1893 9262 1769 4126 17479 18571 605 9431 651 9924
1772 14592 24352 32328 28392 27142 20856
1773 22883 17406
1774 21549 22117 23614 25684 20749 25686 27865 21868
1775 24096 23249 30937 33821
1776 21172 22989 22413 25002
1777 19114 25856 19670 39255
1778 21181 21520 29343 27304
1779 26702 22657 23224 33496 3428 12186 22603 37745 22651 25162 3430 34496 16201 3419 13870 31278 10603 39146
1780 22735 33597 17406 32566 39523 25916 28155 27599 38338 27840 4236 26651 25899 23869 38986
1781 22549 36441 21856 24625 21516 21948
1782 39431 30923 29878 29834 27168
1783 20744 24965 25615 33201
1784 24786 5773 6700 1594 11139 5421 14230 8890 20170 531
1785 21914 21536 26822 24136 24477 39218
1786 3107 552 13153
1787 21880 21871 30228 34878
1788 8906 8937 19757 20951 18056 25650 10664
1789 718 456
1790 24052 23214 22902 22414 24567 24732 24684 27070 22460 24226 28298 24254 27096 22574 22553 22522 22491 22905 34741 22375 25324 31050 22966 22667 39451 21904 23905 21905 27478 25704 22506 27042 24088 29180 24743 21693 22412 21926 34931 22459 24544 38922 25716 21856 24513 24740 24969 22640 21126 26610 32558 39586 24542 23012 10880 27165 25294 21536 24136
1791 25753 30927 36893 22883 24476 21909 34082 39376 30275 25096 24529 23912
1792 3191 13718 10990 16833 18632 8355 7536 5985 7596 10995 7589 6012 7600
1793 2025 12799 1627 2000 15344 5512 5518 837 19909
1794 2674 4646 6833 570 5929 5868 5928
1795 5420 5004 978 34001 13130 16986 809 3038 23781 557 402 1620 559 14255 2220 7605 10366 5006 1811 4215 305 3101 18392 4519 446
1796 6542 11394 19451 12452 5216 11281 20769
1797 39155 31798 21950 22719 26348 38764 23306 25097 10879 25725 22914 25189 34839 22874 23196 10880 21536 24078 23543
1798 1152 2633 8279 35234 2602 1666 1691 5347 25203 6919 15960 15947 38757 9496 1183 6095 4369 1248 3487 1128 6170 6903 9247 3697 8959 1236 837 2018 18589 2622
1799 4363 23241 3697 211 1148
1800 6832 1749 1813
1801 5088 639 642 7296 17774 1538
1802 18258 18016 283
1803 28659 31327 33601 26386 24065 24564
1804 197 2252 3071 559 4674 5968 13150 203
1805 33492 21825 30424 21100 11583 21743 21106 32851
1806 21694 22387 22549
1807 39653 3092 3059 2484 3522 201 2067 13308 35455 1021 12519 3577 17195 19245 1023 559 20024 11691 6589 34866 14298 620 18668 12301 206 12184 32615
1808 513 10511 8099 20942 15178 26560 20939 7605 8095 3012
1809 13707 2976 4249 29708 35851 18708 23639
1810 15009 1609 2976 35882 36914 4327 2644 8554 1500 8836
1811 5305 34300 9115 3621 15383 5625 6288 10904 2168 20595 1667 6894 14266 8248 1126 3713 6195 1131 3711 6175 3646 1128 6176 3651 3652 1187 9498 15362 28472 21192
1812 8575 4426 32680 26917 24937 7983 35223 28403 27784 1626 13076 29402
1813 891 30348 3926 3922 15867 1851 12778 579 15248
1814 435 3540 6555 5756 5308 5323 21187 14837 30401 13527 14500 6569 4358 19599 29125 9069 6347 340 337 6883 8892 5067 443 336 1342 343 426 4371 20921 6291 3437 8815 1204 34210 1340 5061 4471 9074 422 9071 5778 2526 6372 1553 550 778 4602 2247 1571 2511 2319 524 8890 10383 6641 309 310 40725 308 17190 558 2302 6612 6615 6613 6614 10270 2345 1437 3462 1321 13531 5060 18169 6429 6431 5759 160 15969 2229 6527 5792 36713 5322 2261
1815 1759 629 12535 3139 3830 18147 4175 21388 8095 2525 14024 991 11531 9334 4119 18343 9447 4057 16339 31519 15732 2930 3941 651 3953 3352 2396 6477
1816 36363 29162 9670
1817 18233 5503 11276 18871 10906 23468 11388 19424 5458 11436 10204 13765 11434 10552 11251 5488 5538 13655 34350 5714 3746 11119 18851 18850 14744 15561 33537 34494 5561 18907 15195 10535 10580 10787 18849 13086 40908 36431 15559 11812 10751 10118 10702 11426 11427 10129 11318 10944 10150 15550 10759 19754 10947 37459 10925 12452 12222 11224 11799 10700 11277 10950 18229 11256
1818 1189 35245 9240 11387 1325 15230 15904 14217 22061 33974 9105 21430 39800 1231 13798 3685 39566 7123 3677 26818
1819 2525 2978 3262 2392 1027 34531 11770 10607 591 39364 4545 2365 4003 29716 464 1735 15645 13955 35554 30852 3310 593 12574 3351 6694 31975 466 1893 8955 3883 13571 650 6751 594 33874 586
1820 22839 27973 22578 23234 22609 25057 34222 32710 23311
1821 14609 2273 13198 1172
1822 11660 31031
1823 456 37789 9947 23479 2472 3105
1824 22635 22831 34410 21905 23939 28293
1825 37456 1335 2488 1452 10674 2217
1826 13944 11250 37458
1827 16548 16968 12022 31429 12072 3192 22018 22020 2662 16971 23142
1828 28487 14941 177 14935
1829 25982 16821 10961 10988 16211 115 10972 5985
1830 18829 11776 36425 10430 1072 8250 15088
1831 2277 15079 28648
1832 30522 26878 32418 19363 14551
1833 19177 9779 5232
1834 3386 11528 3250 837 1764 3323 4539 16935 887 3849 628 28922 3262
1835 14451 886 17523
1836 11323 21188 2562 11310 33989 3750 2457 16160 1808 26811 34095 30068 18922 2192
1837 9984 20863 20862 10202
1838 33721 11675 38652
1839 22800 20818 7546
1840 11132 744 4205 2525 9920 20395
1841 25381 20734 21116 21132
1842 27276 8851 20748 37495 27867 24886 39393 21523 22171 22172 25341 20725 37592 27877 8849 17643 20691 25381 21130 27852 20680 25191 20681 20685 20722 20683 21342 27106 29750 39096
1843 19412 1073 6496 15692 957 1085 20126 15078 628 16357 691 571 10445 10442 7948 10439 572 25382 3862 13434 1093 10033 21977 3353 16115 9723 14449 18480 3217 4705 1057 9472 35127 1031 10873 40084 12972 11508 15210 22004 16615 934 674 4045 16617 2786 9316 10615 12889 12788 2493 19214 33921 5030 4938 4949 4958 22296 6364 4959 18465 6118 11922 15263 39696 5079 20139 3549 20456 19190 20416 718 18467 12730 3011 2525 2978
1844 22887 23510 26689 37189 24979 23097 24058
1845 22832 22968 23233
1846 8212 4549 3487 3652 218 2540 160
1847 17173 8388 35039 5177 10952 37440 5685 17214 1311 39689 12731 26525 1504 17106 34475 1488 5429 30520 17175 21681 8467 1463 17216 1537 283 7834 7868 18311 32386 29684
1848 12627 10953 17152 8548 4994 17121 28931 1277 27398 5202 27388 14802
1849 1459 11016 8092 4674 7511 3730 18632 7506
1850 4702 22233 16963 15458 2317 12182 38576 2305 17009 10394 204 529 6609 34478 7365 4650 3105 5423 2526 4294 14308 1242 35006 38562
1851 5951 14892 26771 36584 27392 5901 26769 33955 5864 28595 26768 5856 14887 40390 14058 5950 27364 27426 35601 26767
1852 21126 22609 26365 26685 27643 25103 24318 23729 12188 21862 23858 34768 28687 22903 24644 24434 24040 22530 32527 25039
1853 13482 26767 27364 24362 6452 28588 5951 27392 14892 14930 5856 14058 27365
1854 15043 1811 3154 7668 17919 7735 7791 3147 18524 22866 14791 14515 4430 16324
1855 21496 25618 21317 3591 21507 25616 21503 21494
1856 33983 26570 16297 30981
1857 13167 15032 1352 8266
1858 19842 642 2337 18288 35090 34342 18591 19145 35461
1859 7458 8274 32137
1860 16962 16958 18041 33979 16952 4702 16964 17965 30850 16953 26737 4808 4858 40172 7620
1861 15752 5198 1314 1496 21560 13047 2648 19286 1268 39971 1495 1309 8554 3416 39835 17214 3800 17343 13600 31665 2647
1862 6771 8417 8415 8414 8416
1863 30868 4910 14791 19640 12115 14034 7453 19735 33742 19733
1864 18756 17893 8071 10225 6951 23963 8587 9528 23495 8619 38057 35647 13632 30786 3732 33510 18644 32454 13915 37130 36970
1865 13161 1428 10323 10337 12146
1866 17716 18182 14639 18041 19646 17262 30196
1867 34125 15174 1022 1888
1868 20395 16709 8910 8931 8133 10626 35510 35511 34151
1869 3471 293 7194 307 559 5142 17379 8453
1870 16240 19621 1010 31874 2525 7960 2405 15491 3888 15510 1851 821 722 1504 1772 991 1107 35507
1871 22553 22903 25537 26839
1872 761 176 805 559 3304 920 3352 2679 738 14449 1061 10612 12884
1873 1079 13402 4077
1874 5136 17680 13217 1437 2383 2525
1875 3092 1314 12398
1876 23331 20141 39219 9953 35651 23328 722 6081 6076 4430 3192 6922 29068 39858 6530 4436
1877 17406 17498 34780 23168 17575 39772 23202 24716
1878 30171 22663 22884 38657 25079 24506 25189 23935
1879 27306 26124 9602 9603 23154 23717 21934 24046 24921 23923
1880 22524 32280 24742 33779
1881 8906 17020
1882 1509 34989 17124 3409 20463 1546 14329 33467 40262 24591 5195 33556 22323 1283 17203 34118 1683 14829 8495 13664 1169 24792 18513 18514 6696
1883 14072 28836 36937
1884 27706 32747 27705
1885 1504 29933 7120 1515 8453 2649 40264 38890 3409
1886 32156 27569 40617 28336 21856
1887 22518 24631 22619 22427 23697 21948 29180 28687 35201
1888 5740 26283 5103
1889 202 369 2075 208 187 192 307 29087 28917 18137
1890 23752 4531 5928 18804 18807 39553 39446 4191 17941
1891 24981 29144 27277 23297 27447 39812 10880 28714 21536 40399 27297 39133 32165 27520 22833
1892 9751 2971 3191
1893 5907 14888 5939 14084
1894 39244 39801 28755 39612 32166 27296 27510 28675 30825 26107 26399 38601 31716 39099 25122 9587 39734 40778 33682 27308 36277 27281 27302 39428 38781 31905 34168 38721 9588 27291 27323 39869 39868 30187 34167 28673 39266 40486 27513 31349 20719 40771 29541 27255 27527
1895 369 6448 11143 8328 15370 4545 1714 2525 10689 2971 1023
1896 27213 25189 23009 22610
1897 13279 1549
1898 2276 4076 24001 34519 1076 32384 2525 978 5958 5939 11730 30168 9991 16030 39779 39780 1023 15610 12037 5896 5929 4529 18886 12511 9992 36805 23429 26426 23601 28641
1899 2121 303 1706 2887 5389 756 33534 11355 11384 8020
1900 2298 10808 129 6892 1292 1673 6099 34439
1901 23303 31819 29302 29306 38921 31796 34723
1902 2972 3096 2127
1903 27622 37373 23697 22719
1904 20575 31371 31771 3725 28721 29087 29084 32929 29212 30989 2971 6992 822 1628 15753 837 29085 28722 39286 3722 26043 19334 29079 24331 978 1165 1537 10689 28736 17798 30410 10690 20573 16092 29075 29211 30988 12676
1905 2384 29661 51 6450 17245 39350 978 1811 2525 4811
1906 37450 17968 7660 17795 17767 16200 33045 3173
1907 34636 4807 2337 39645
1908 1284 11854 13489
1909 1537 4294 17754 283 31478 2220 13370 24843 10472 15180 519 7605 51 718
1910 4654 2299 1421 2097 3472 1593 1790 1586 3107 302 14346 30116
1911 27450 9296 27773 1035 942 628 10615 19482
1912 30985 31864 51 6455 643
1913 2662 22748 2365 4203 10030 1031
1914 6204 306 4654 292 13130 198 35007 2511 2257 12178 205 406 208 408 10382 39926 39637 2136 1553 2263 8653 2258 5006 3097 529 6445 12182 7369 3788
1915 9223 822 2007 9163 6988 32611 6991 1609 39270 16990
1916 7675 18600 17710 17711 7697 36276 3972 2525 1811
1917 5159 448 39832 12161 16190 28379 3091 7384 14334 11151 1128 15503 178 5399 4598 1553 2472 13339 11711
1918 17886 37645 39823 642 7268 18252 33976 2748 2773 17788
1919 3989 14052
1920 3607 6761 17686 3152 7471 35759 35750 7399 15342 12414 33339 26866 34485 2662 26196 15324 22748 17706 16105
1921 7966 1933 4121 917 681 3894 14719 11765 4033 13186 26871 12031 6843 16240 1883 8142 1863 3891 1975 16563 17737 1877 1861 7839 1888 26009 30351 6038 703 2525 160 40806 1806
1922 7275 283 25455 7256 3126 17777 5104 14370 18203 9793 1538 11455 36373 26752 4294 642 17783 19839 1023 718
1923 20673 1736 23245
1924 20603 1974 880 3899 628 17284 5946 15062 2493 31512 821 1628 2398 15276 2970 2665 11438 3898 9298 7648 4906 3154 543 13501 13166 13067 8027
1925 192 3471 18821 1573 3792 5997 3152 32008 11793 34892 1811 559 34456
1926 302 6832 189 3318
1927 23387 35496
1928 3607 10866 1654
1929 39032 35183 36486 27290 27255 33682 27288 28775 28824 35572 27326 28762 26648 27533 23297 37751 38989 37724
1930 23028 24192 22913 32983 22608 21516 27498 34457 32485 12192 24649 25252 29194
1931 38993 22490 28680 40928 17498 4202
1932 36415 10648 13045 38031
1933 27094 37253 22443 22935 24586 21536 29788 33335 25160 27056 22916
1934 28244 24504 28251 28034
1935 24260 22377 25738 27962 22652 22669 31298 21948 20727 22364 23679 22624 25695 21934 25532 29529 26348 28060 38840
1936 24038 23297 26448
1937 21480 8928 20951
1938 21611 21590 21546 21359 35496 24425 23030 39400 29744 8849 17484 8850 37187 40921 34859
1939 7914 31917 3368 3367 9463 9956 1033 4382 7001 1811 6037
1940 21948 20727 8849 22827
1941 1330 18911 10843 5536 18865 8266 9503 37459 9975 1189 4373 3719 5669 30993 12423 6914 13656 5527 38003 10583 10722
1942 40181 36266 18027 12942 4275 245 242 4294 10689 20630 20629 28917 26043 30420 28902 3727 12676 28726 24326 3722 29212 31369 20628 32929 30989 10690 29218 30410 39123 28909 30988
1943 24542 27555
1944 23884 27326
1945 14449 3014 2493 4229 2525 628 946 3000 9264 459 20042 718 4952 3397 942
1946 37475 35612 25833 39785 38913
1947 33827 25758 23356 22642 22380 24308 24573 25127
1948 12849 16626 12846 9793 2971 1537 17078 32372 8454 14329 17093
1949 526 129 4368 6426 6527 4392 5147 35452 18833 8048 9146 4446 4447 9072 9071 9173 10668 8825 224 6347 128 6715 5149 2627 1128 1127 3711
1950 15128 655 10036 11107 18009 7955 16571 2963 11098 15866 711 12577 3899 3243 10689 3261 2665 1843 2525 628 33350 8128
1951 13168 3297 887 13162 2680 5452 718 1829 6510 2998 30638 2927 16781 1755 32415 1726 6673 15073 466 1910 2525 2337 2964
1952 835 38978 837 3615 141 5211
1953 23300 24415 38548 34840 28780 25029 38998 37128 37744 30182 27524 40399 31900 26122 26123 29351 23297 38752
1954 10301 18646 5402 21198 20910 9701 356
1955 7905 6499 2635 20652 2019 40714
1956 25376 21158 40903 27833 20748 31724 39651
1957 19804 19852 17825 5110 13756 20396 7294 32538 5090 2830 2692 2686 15872 15873 19557 31648 14384 7242
1958 2662 9775
1959 26456 27214 32998 22430 24043 22562 32125 26416 21181 23670
1960 22919 32756 22636 22497 8846 22582 25006 24182 24168 23706 22539 22649 23011 22959 40960 25238 22422 22827 33308 22637 24266 23234 24189 26626 4202 22719 22278 12190 26614 23663 25350 21905 22961 22506 26610 12192 25039
1961 8537 1066 16618 1034
1962 13985 13813 4545 14048
1963 8906 12957 37964 16678 21507 17644 13021 33538 22318 25657
1964 28914 28732 10689 3261 34119 10694 30954 6406 5717 644 29554
1965 37908 27271 24921
1966 2311 14405 11896 978 3012 976 11458 9997 13275
1967 33956 5954 5901 5898
1968 14773 16647
1969 10227 12270 8052 17012 2190 4581 9397 12265 6415 13323 11163 9353 12180 27170 8023 30534 30532 28858 28853 1594 529 8020 9936 12308 9528
1970 4647 5639 15882 16499 19585 31760 8650 18544 10303 8615 18434 35110 28631 10225 10227 10226 13316 17009 36383 3086 623 11708 20032 1599 8583 16500 306 6087 8189 4648 20695 7200 2450 16893 35743
1971 8540 8538 978 35194 18807 18801 35195 18800 18803 18802 18805 18804 39506 39553 12727 283 1317 1004 2337 16846 13220 33669 37270 7837 26748 7870 12928 20477 31789
1972 12883 32649 2967 13125
1973 2252 403 13129 21248 10797 33376 559
1974 718 18467 2525 15513 2350 13398 2356 37775
1975 4542 30547 2337
1976 4719 10869 14040 4813 27456 30547 16009
1977 34831 718 6121 12399 4946 10081 13066 4956 11932 19541 9778 18448 35509 19179 5344 5440 5226 20139 8522 1800 4888
1978 21168 21130 22126 20733 29843 34168 30179 21590 21540 21579 22211 33812 20742 21176 35053 23110 22734 24909 21536 23543 22602 30243 22918 10879 17406 25312 27475 31116 27473 27711 34431 10883 22410 21172 31821 22972 21948 20727 21166 35180 35853 8849
1979 22929 23715 22921 36387 24307
1980 22384 8849 25376
1981 23213 13272 21924 36873 22321 23902 23539 17406 22513 27647 26651 21903 24065
1982 21520 29136 29839 29135 32246 26122 26123 26448 34554 30819 28175 23925 29144 36956 27293 36312
1983 775 2315 559 2034 19141 20885 21301 7459 2923 8325 837
1984 17406 26434 27935 32305 32965 22372 22834 22839 22364 21693 40914
1985 28811 25521 23297 23885
1986 22719 32067 32125 32998 25725 23676 23717 38564 25294
1987 25277 25679 26633 21536 30817 31320
1988 22437 31066 23225 24199
1989 37261 37472 17627 38474 18620 17637
1990 27521 23120 24478 22196 37538
1991 22895 26601 26119 25000 29499
1992 23155 24420 23343 26120 25028 38754 28747 29319 27292
1993 9773 12253 10460 10464 7697 15045
1994 34050 4565 31767 5776 9936 458
1995 22719 9914 22435 9451 23697
1996 23850 8556 8552 8554 8553 17173 5689 31870 20467 5140 8463 35749
1997 24889 27241 27282 27264 26110 29319 28829 23921 26047 36572 9599 21521 36785 28802 28814 9598 26103 9586 23929 26648 35788 28673 22833 27251
1998 23715 22968 34053 24061 29722 22835 21536 30441 25351
1999 37560 11364 2510 448 5421 28072 6600 30764 16982 8890
2000 2067 2474 3736 575 978 4622 31669 35037 1436 4519 2465 528 812 529 6805
2001 718 1023 4645 1022 9871 3576 555 32029 15150 2976
2002 466 1107 2386 37428 10041 1029 2935 1749 2969 2958 2524 6739 2934 2936 11468 1811 17812 9786 4121 12987 28923
2003 20475 6188 23251
2004 7940 3121 4288
2005 22553 22839 27989 23700 22609 23407 30686 35307 33627
2006 3012 3261 12067 16086 4905 19358 18602 571 970 674 1937 696 2337 20913 13248 12044 12034 37031 6923 12022 17980 26918 13556 3192 14742
2007 26762 21439 31353
2008 837 976 2337 642 18255 18582 7220 16038 16940 28984 5110 37157 13730 31048 1650 5520
2009 1125 1249 35451 160 16466 27379
2010 17454 14755 18429 19387
2011 1917 605 870 4142
2012 785 2906 6133 3475 6821 812 4462 559 13486 15521 722 17200
2013 37940 38095 9408 2513 31808
2014 37142 3180 3183 3143 30890 17494 7573 16179 17917 37509 7747
2015 15875 2880 26266 14883 10084 7286 5080 31489 35620
2016 13715 109 102 5982 6013 8108 97 10972
2017 2926 880 6474 2969 12947 35083 2956 16663 3397 15216 1992 2355 4235 12343 145 3371 4092 14603
2018 991 6478 3154
2019 25761 21450 21460 21798 1652 33369 21105 23585 1650 141 2220 7783 7786 2215 2219 11607 11454 15209 1023 14413 6991
2020 23462 1729 8334
2021 7936 6682 16607 11473 1740 2525 7937 6852 865 24030 3297 11106 155 722
2022 642 9822 197 198 11365 8587 559 18492 12613
2023 38044 23108 34250 33601 23902
2024 36285 35163 26974 36295 26984 30668 36338 27679 27677 27012 27682 37828 26977 27004 27011 26997 38461
2025 24427 24062 27301 34951 29773 22635 23294 22371
2026 35180 28688 40722 25098 21942 21536 17406 31554 25910 39898 35093 39592 37364 39065 27198 33380 27199
2027 21920 25007 23906 35793 33693 21536 21158
2028 13031 17642 49 16 8918 3601 13002 37965 10662 15445 8912 48
2029 22922 26857 26451 30364 25313
2030 9590 25930
2031 34748 23931 23109 27531 23697
2032 6904 1537 20087 3810 17151 1362
2033 21906 21695 25052
2034 22603 24212 21914 23861 22561 24125 22522 23225 34537 27039 22887 12188
2035 21536 23697
2036 26099 23120 22837 21865 21125
2037 22603 21582 29758 23391
2038 19529 8709 21384 8095 33215
2039 29336 40517 23222 22522
2040 24125 24607 34020 24978 24122 22431 22430 17405 28592 22446 35337 34641 21856 24100 36193 34282 23200 30460 39601
2041 15997 18072 6121 10061 22301 7605 11050 28936 40439 9779 20449 5078 10068 40915 4934 10087 3549 37525 39959
2042 25072 25700 22553 28286 26953 17406 917 39367 22966 24595 29329 21536 37296 22574
2043 8219 37961 22105 34126 22106 21739 10498 6696 26181 35418 32799 21738 32798 32800 24869 2363 1625 2579 8211 1148 1299 1295 1326 10294 6247 2600 2235 1407 2608 2181
2044 3243 1105 8339 9989 36526 2525 2927 1061 31592 2923 12225 6475 14442 12343
2045 16136 33455 30732 34585 31341 33700 16139 33588 35307 33285 16122 20395 19127 17404 29871 37840 30730 32052 35302 16135 16145 29873 16141 31342
2046 13964 15180 26559 23810 19959 31007 17814 32364
2047 24520 23883 30439 25324 25697 36164 17406 23224
2048 16338 34041 29892
2049 37066 11858 29648 39123 29211 28736 28907 24328 40513
2050 37621 8010 12996 18961
2051 21128 21913 22882 25088
2052 2736 13167 15465 2380 2963 1965 1072 37735 1853 27775 2319
2053 8888 978
2054 20623 20620 20626 22031 29088 29554
2055 12476 32001 13296 9871 11615 9469 15154 36051 24371 39270 5282
2056 15957 1307 21306 21305 4592 6303 3480 1183 31447 13258 2192 2233 3695
2057 21463 21074 33492
2058 12534 8321 26737
2059 16225 36407 10794 32255 4280 7776 7311 4333 4246 34800 4273 36270 4319 35456 11628
2060 26892 28920 28917 29083
2061 40532 9900 13697 23599 38349 32590 17511 13687 10825 7343
2062 7878 32142 12910 13246 7476 17720 7815 7642 7644 7649 12909 8304 7889 7888 14042 26579 2332 8532 8522 31570 34152 17669 12031 26509 15235 13110 3152 7174 7171 2843 2692 33745 2691 2773 2659 19826 7281 7228 642 33277 32392 19649 13810 12920 12915 16370 28625 14041 13242
2063 19544 21651 26234 8724 30776
2064 23639 23087 11638 23086 23634 21416 12430 275 269 4294
2065 3607 4818 5017 6757 4785 33551 4162 15664 18828 25500
2066 666 10017 2929
2067 2010 28399 20917
2068 25116 26837 22454 37957 21862 40397 32716 31944 28263
2069 25523 22607 38841
2070 23667 27848 29298 31891 20689 34719 29848 39393 24917 28047 34407 28506 36034 36205 28048 39651 8851 21178 34406 20742 21322 39941 25639 22194 25648 25638 24912 21320 23033 21158 21528 20682
2071 27098 24505 28157
2072 37838 34196 27877 30369 30812 20712
2073 17406 37547 23340 26407 22561 22880 30280 22562 22990 23214 22918 23154 21573 25701 20754
2074 32097 35496 28675 36956 33398 25112 29838
2075 7546 20818 26309 8847 19654
2076 23709 24443 25751 28246 21536 22921 21858 24046 28328 25292 27217
2077 36475 27168 26392 27532 25124 27940 33468 29185
2078 22725 22409 22434 21933 28755 27247 37679 34432 21913 23902 28169 24136
2079 22443 22418 22406 21924 25036 29109 8844 28272 25185 22464 24032 27966 39837 26710 34419 8846 28184 37350 26492 30441 31698 22408 27108 22651 38579 23517 22553 37611 22376 24058 24550 21154 23679 39103 22473 28185 17406
2080 17573 19109 32580
2081 9918 20812 8861
2082 12115 12118 32390 21853 7457
2083 28663 28214 30925
2084 33406 24419 23350 27525 29783 9596 32097 35496 26104
2085 30218 30219 22190 22490 25281 27200 27063 12953 22494 23533 25141 22187 38993 21933
2086 22919 31700 21943 21124 21158 17484 26313 25342 28507 21320 21578 20735 39393
2087 32986 22437 24196 17406 29560 33410
2088 21536 17406
2089 26778 28785 24980 17484 23297 37838
2090 28362 15184 8098 31616 14513 8097 7706
2091 33330 33738 30653 17471
2092 25088 31946 25319 29063 22578 27216 32711 21694
2093 16137 16173 25649 38197
2094 27197 26629 32815 1488 38514 23715
2095 35961 5535 10717 5536
2096 36831 20536
2097 23641 27072 30929 23697 25926 33570
2098 4785 13248 12103 12078 12123 12124 16849 3607 4818 8415 20918
2099 197 2483 192 3096 4215 805 3423 559 540 2525 3121 2375 2957 18528 16635 19467 15097 28425 18486 14792 13198 156 2979
2100 25041 22413 38208 28279 24732
2101 5382 3133 3794 2903 15895 4627 9402 3076 12540 17189 25509 1237 215 5427 296 2345 205 10326 2146 6584 10797 16484 6589 3088 778 1619 8157 3074 1188 1128 40880 212
2102 20648 13130 2136 325 805
2103 12860 12855 12847 12846 12885 31467 29116 971 949 964 1041 987 951 984 985 3356 8255 36626 1075 10024 11605 995 1083 31469 4347 1108 15210 21972 24320 35473 630 10595 19131 31468 31472 962 31473 16118 1057 16115 39267 28423
2104 10225 3022 176 5419 4627 26865 40974
2105 13096 3576
2106 12613 978 5953 14065 34945 4562 34832 17451 7242 5120 7212
2107 247 266 2635 10579 598 2203
2108 23814 6735 14310
2109 1577 192 1440 2362 9373 10273 187 978 15622 37731 20199 20587 12196 2525 543 642 7614 1821
2110 30336 13222 2337 10694 19781
2111 23397 25116 25723 22437 22317 32711
2112 976 7681 1811 4416
2113 26734 13356 17970 26735 26736 9789 7658 23265 11835 3156 7703 7697 9797 9754 10462 17675 7669 28599 3144 17811 3178 7572 19163 14523 16325 23266 17501
2114 14881 10481 10525 24853 26175 503 10483 22266 32087 10499 38858 29574 29573 29575 32570 25953 28120 18307 12439 4924 27761 38669 18515 30487 32354 17026 35551 4239 9523 23984 34126 16213 19931 22105 19929 19927 1169 18329 19727 33659 31623 30377 32834 33206 33663 30379 31625 30498 31631 34730 33303 31641 31633 36103 33301 30759 37080 31627 8972
2115 26876 19894 13963
2116 2586 22056 22095 5670 2557 2572 31913 14173 4598 18915 1805 34095 15442 11308 8888 1336 5062 27726 1245 3677 8248 39906 5696 3640 17602 18262 20854 6442 5668 2424 2625 6230 1240 22073 26816 21021 15933 12426 6090 6089 1189 34237 35917 40107 35411 2521 2272 15336 3607 33550 2332 4745 2337 12960 18676 32949 5588 15111 17699 2334 5693 1194 1154 1127 3687 3680
2117 37498 37499 39447 29411 29409 29413 33371
2118 17554 10705 17567
2119 19696 26553 37197
2120 30957 35976 2365 20141
2121 3744 10802 25987
2122 30869 26745 16970
2123 20574 10689 18467 3011
2124 36244 29950
2125 1593 3073 3094 5637 39230 12310 2067 39648 13823 9393 3039 4629 16889 6930 3077 39994 1601 23737 8582 3784 3019 20023 31368 4519 5767 4623 15918 1421 2071 2291 39881 8613 558 40725 34998 35001 35008 549 309 35006 35000 35004 34996 38562 30745 13802 194 1430 8896 2474 9528 1352 2221 3288 16004 3261 8266 14744 2971 35509 15999 5452 5240 559 7353 11386
2126 5198 39319 7120 15878
2127 3132 6524 628 581 997 2937 2963 880 3928 1847 3872 9441 9730 868 892 991 470 2917 695
2128 2357 6498 12884
2129 4271 4272 11639 7332 4297 16679 2219
2130 1820 16415 3861 886 23831 991 593 3352 1056 3857
2131 853 878
2132 7940 585
2133 33739 27765
2134 967 15253 3895 3899 1771 39910
2135 11855 11856 38007
2136 632 18047 13423 687 17999 3558 155
2137 31640 722
2138 10789 10732 10835 16463 10091
2139 258 1526 257 256 718 4946 5030 22296 18458 5226 19541 6121 10081 12399 19250 19542 4962 4944 5344 5440 5343 5079 3551 3549 8348 4950 10694 33052 8518 12260 722 13459 17430 8544 3419 8241 31678
2140 12105 4818 5017 4738 4829 16857 6760 4830 4873 4757 6755 12595 25504 15299 12466 7804 40606 29700 17862 5580 7809 33676 14041 39910 33550 34155 7826 4889 26737 17262 4859 12468 36059 5588 2332 34153 17654
2141 20334 30437 16431 16421
2142 32568 29970 29986 33659 30759 33663 30004 30010 33206
2143 27712 33001 40594 22501 22663 24506 23894
2144 23193 23902 27489 24583 35093
2145 37176 29841 24418 27533 39171 23697 23341 33383
2146 30663 21948 23396 25431
2147 26692 29541 31349 23224 33077 23200 23193 17406
2148 23641 38991 24981 28997 21356 29066 29292 21338 21334 21628 21625 29356 34562 29840 28743 30627 37750 33310 28793 39009 24419 35688 21596 21354 21333 22179 21336 21360 29050 22165 21348 21339 22177 29049 23110 21341 22176 22178 29307 21350 27850 20755 20739 8849 32479 26211 21156 20715 28513 28159 25192 20744 21118 20730 20684 25381 20687 21121 23607 27852 29293 23615 23383 20732 21589 31165 25129 30557 25684 21359 28511 23093 31729 31351 23606 21345 21330 25435 22316 21357 21590 25430 38027 29048
2149 27989 22418 22719 39032 23916 35076 29795 23724 22413 29109 21154 22448
2150 40384 28236 34878 19383 21881
2151 37018 31686 23112
2152 9453 23500 22657 25751 28744 26124 21536 21905 23896 31312 26121 38016 23697 23916 23297 25236 23038 23234 23355 34747
2153 21693 21128 22635 22918 20719 25433 26129 31386 31292 40705 31401 31289 40978 24627 31396 31303 31389 31283 31398 31403 31284
2154 16890 6962 23482 1469 12161 31669 31923 4579 190 33368 1627 12815 17040 12809 837 17057 25211 8772 6980 6204 31576 4565 8686 8674 9291 31670 559 5172
2155 22490 31243 27712 25721 29812
2156 20689 20742 17484
2157 3604 12994 3605
2158 19379 21878 4202 24738 8931 8906 5172 8034 3810 24591 26966 1275
2159 8945 8929 8149
2160 8847 26299 3426
2161 17406 22430 22587 22524 22588 22602 23509 37754 25743 21856 24708 23698
2162 9862 34816 14593 32919 34256
2163 4545 9510 26871
2164 27317 38086 28067
2165 33470 15399 15398 16220 2339
2166 23348 21520 22895 22651
2167 9228 837 25626 1609 1537 51 4593
2168 2473 203 329 814 189 3096 12146 4227
2169 24179 21895 10877 31945
2170 917 1928 991 1930 15496 36010 6851 744 20608 2525 4289
2171 643 15506 30743 36658 1169
2172 28275 23673 23681 24623
2173 30676 13046 4684
2174 21289 8701 30974 8703 8095 20952 19545 30776 21388 8719 6787 12677 21387
2175 17432 5327 31611 288 13280 26275 39835
2176 10957 8360 7498 123 7583 16817
2177 877 11480 2972 141 32912 2363 837 2635 1857 4046 691 3195 4775 2675 15070 1955 17880 10041 3392 856 16670 1961 3594 677 1087 4037 3882 2492 14614 15739 1847 3349 20271 31250 19135 1762 876 8332 7745 1854 1816 1988 17517 8307 1711
2178 369 4657 189 553 2324 552 2473 323 1571 3107 296 205 692 34627 156 11950 18442
2179 27998 27883 24203 25700 25057 22662 1504 1506
2180 35012 31260 28638 18209
2181 7236 33374 2717
2182 36395 37527 26740
2183 31381 4499 2605
2184 38792 28643 15716 23127 23426 9436 287 279 15145
2185 23890 29521 27166 10884
2186 2673 33074
2187 4900 917 27028 11519 17490
2188 26398 24403 37101 38310
2189 4889 2337 722 25999 8429 1463
2190 8979 17162 17203 1315
2191 5769 2259 2324 477 3107 187 2071 3044
2192 16643 4818 4764 4770
2193 19597 14937 4587 9495 31384 3709 1340 3112 12680 2609
2194 28096 28098 2341 7927 1811 2635 9734
2195 141 51 3221 32317
2196 559 160 30009 30042 30031 29992 21559 33659 31626 19727
2197 25482 3285 11850
2198 1169 18725 20805 1538 30490 28016 26563 24384 3736 11709 8189 805 16986 24383
2199 2659 10086 4430 15265 642 19647 11129
2200 6047 51 15600 1609 30501 13880 29254 18126 9751
2201 22067 8232 8231 22068 6881 2494 8230 1157 8952 8950 559 6799 3773 1292 978 27793 16499 14837 1231 14821 375
2202 9793 6112 11709 38148 8095 6345 2489 16793 18264 10689 160 27441
2203 30989 10689 29086 28731 28732 40513 12676 28725 24328 6216 29083 3727
2204 11530 1876 36592 7633 8147 677 6520 1873
2205 5750 27334 5749 2840 2708 2732 7294 7127
2206 4169 3196 4167 10447 3960
2207 21452 27770 3345 18301
2208 32466 8118 37489 26317 27091 18621
2209 32185 16431 16430 12957 8239 38454 38453 33719 40091 11677 28493 33722 17478 11684 11676 37652 22559 22557 7934 22556 2941 27451 24987
2210 22919 22839 26626 34583
2211 21361 21149 21169 23542 25319
2212 25000 39124
2213 21573 22642 39189 23614 21150
2214 26632 33697 28716 24426 28461 48 17406
2215 23904 37363 22802 30477
2216 19445 6107 7480 1242 160 8214 455 34976 26762 26763 10682 4371 2507 14941 26764 1128 1127
2217 32113 25662 33703
2218 8130 11668 4681 3604 18962 8005 10626
2219 40948 14507 26722 40219 978 13272 37045 40280 11739 40692 19397 18793 40906 21644
2220 31049 19001 19114 23177 27880 25867 25866 19007 16734
2221 23406 33815 9915 28167 7548 36374 26298 8847 26302 33466 21285 17571 9916 9918
2222 9521 9509 15369 9176 31861 6109 15439 29695 11855 1537 13591
2223 10514 13957 26874 12607 33824 15524
2224 23458 22853 13344 13957 33225
2225 37258 21316 25625 21512 13859
2226 24762 1594 8741 4571 1207 18550 8664 3078 9492
2227 8332 23697
2228 205 5006 2327 2315 410 3737 194 2097 2080 207 12182 30987 13312 19223 10337 198 2465 8897 18078
2229 22064 22355 36327
2230 12602 14880 10483 36858 6859 36654 19621 5550 283 1004 3419 160 19727 25370 1038 40233 15679 964 15676 6512 2525 821 4289 31612 32794 10495 13956 33997 1172
2231 2525 1609
2232 620 192 370 187 800 3475 297 306 2525 632 18897
2233 19034 8095 1264 25405 29705
2234 4895 15024 5110 7135 642 38873 26945 4908 4910 12470
2235 18671 4827 4819 543
2236 25361 15683 3946 9914
2237 4737 3617 16235 16236 12105 12106 4873 7476 7864 5589 19745 17726 7649 38730 4858 14390 25808 2337 1169 26568 13352 19683 13345 19968 13957 15180 19874 23458 11488 19950 23808 23803 19889 11489 24381 19949 18514 13956 9768 16223
2238 6 1214 9537
2239 19860 9185 13757 19823 2761 5110 5104 17831 12899 7136 12898 19812 2709 33281 31836 642 12612 12897 7137
2240 15591 18456 15592
2241 31589 2252 8023 34094 2326 176 546 3562 15624 15626 5546
2242 29555 2971 11044 15262 29556 18100 5078 4930 9779 5223 23073 9478
2243 35438 30975
2244 1419 226 36691 11652 1804 6257 6325 40136 5158 5160 1128 5699
2245 4221 3012 13940
2246 12146 307 176 369 559 2337 14043 12563 12196
2247 9288 21236 2970 1858 3941
2248 1933 2924 307 12144
2249 17552 17551 17553 15194 10791 18814 10702 10580 10527 18231 10746 10741 10743 17555 10711 10562 9983 11823 28435 25938 10549 10548 10926 10843
2250 17430 8549 27190 8453 28620
2251 4888 3328 17663 7874 7876 7865 37511 1538 1811 26236
2252 22337 22697 194 552 10327 8661 6029 6977 3021 7360 7365 5419 13915 4622 28347 13794 10405 24766 34655 34310 6952 31767 15421 6944 12155 18542 13324 28954 9291 6942 14164 6590
2253 17994 628 870 1896
2254 30857 3367 13165 6869 16917
2255 23396 40812 21856 37763 28294 38205 25116 21181 28681 23697 21948 26839 29020 23196 27022 39466 33852 28185 24217
2256 36965 31049 19117
2257 35771 25242 17405 30686 26472 22413
2258 658 1066 659
2259 22766 16742 19005 27227 30828
2260 2525 978
2261 21186 3809 8554 17200 17379 5685 17214 3810
2262 25617 15357 13011 13008 13010 21500 21492 21510
2263 9871 23419 36942 11615 9470 39270
2264 22441 40960 34013 27651 22961 22506
2265 34177 24168 24082 38381 35051 24973 25080 38812
2266 8865 28494 17498
2267 14349 9166 9164
2268 23233 24153 24209 24965 23408 29173 22923 26332 22839
2269 1930 4186 877 11811 21846
2270 22990 32544 24070 23541
2271 1674 19332 2172 4371 3480 1292 337 6566 3521 32084 22087 5805 32591 9857 5445 9862 9856 363 346 3516 18152 20921 391 14500 4394 326 336 5786 4485 8813 1244 2192 3627 1237 6271 3518 4432 3510 213 5806 8044 2539 2633 6341 5838 6342 18169 4451 2624 6098 6263 6282
2272 17463 35019 17475 17457 3288 18429
2273 11623 1024 31408 11557 2664 13584 18013 7897 7902 6687 7900 12586 1744 1897 2525 1500 1499 32295 7120 1551 652 20881 16782 3354 2997 10041 1873 20127 8275 7958 25881 26250 7937 1772 3360 34148 24021 2995 12902 14775 13168 6848 11480 744 2396 30997 917 40473 3841
2274 19776 4629 4519 1571 28078 5377 3026 13899 10364 31972 6648
2275 30903 16025 462 13209 464
2276 28687 26124 23355 28804 23108 24907
2277 28077 20605 29716
2278 8492 8493 27346 643 13599 35740 15010 15008 250 4994 8548 4996 3820 26018 17079 1537 2220 141
2279 1658 1650 7793 15323 37310
2280 14013 7840 14790
2281 30347 3369 159 920 14793
2282 3196 2337 1904 2525 3246 19442
2283 36577 20861 18428 33828 31432 33739 15407 25487 31418 31419 31417 31910 18200 14755 18430
2284 6797 6146 2885 6796 31868 7201 6086 7258
2285 35437 2404 18528
2286 2525 2493 6088 6423 13826 160
2287 16586 5120 18249 17781
2288 2489 8977 7087 184 4549 1128 5673 37952 39338
2289 5170 8337 16335
2290 12966 33984 17419 22678 2682
2291 6588 553 13471
2292 22127 21158 32505 17484 37178
2293 16295 7331 29460
2294 34215 36933
2295 40494 29050 23095 29066 21950 21585
2296 15781 8013 15858 15798 13002
2297 12228 5107 12092 20476
2298 35070 4914
2299 18171 34607 34606
2300 3598 4684 15353 13858
2301 32364 25795 33228 6661 36538 25955 12459 15180
2302 17826 5102 18109
2303 22406 23896 40910 22830 27041
2304 20727 40840 40480 31681 22553 36481
2305 23232 24455 23902
2306 13861 3601 15702 21490 13005 30677 8005 36419 30970 15351 31 18951 25087 8906 26247 22245 13850
2307 19009 15356 33734
2308 9918 8847 39077
2309 17495 19111 17498 39601
2310 22623 27571 31212 17406 31620 14791 12340 27563
2311 438 17173 8554 37143 8557 255 17107 1509 722 1551 559 8770 4565 9359 2263 6204 2071 4570 3784 3095 14132 13801 6570 801 9829 1610 3036 14173 1197 12134 2266 12173 16525 12306 35135 8725 35604 437 30765 7394 12274 24756 7348 11711 13339 35007 10366 529 3097 18402 40980
2312 29603 16145 19127 25649 4201 21257 29604 29579 17403 40941
2313 954 953 1962
2314 1609 6047
2315 575 36538 18121 28338 18120 18122 25954 23813
2316 5405 2345 2257 20527 2511 20836 29917 6589 20789 7974 296 14235 8597 325 2315 31367 780 4622 13801 8157 805 187 40966 5417 9262 8321 468 2525
2317 2364 39680 20475
2318 30633 6490 1076 28483 3195 3994 628 31421
2319 29248 36345 7403 20553 14655
2320 10879 24965 24230 27207 22656
2321 9913 718 10507 512 165 16223 1169 15281
2322 28320 2322 16889 805 2417 3422 2526 3742 8674 3059 1591 39676 1004 11687 38394 2976 283 559 3096 2155 34996 35001 35008 35006 38562 3107 309 35002 34998 1601 1209 529 4646 33966 546 35537 6928 5682 2324 621 10337 3134 27823
2323 953 1965
2324 3261 642 978
2325 14727 15218 564 26798
2326 19360 29937
2327 1210 11707 792 176 4523 369
2328 13803 160 27175
2329 30534 28859 5013
2330 35119 23070 21289 10830 2971 8095
2331 18868 10720 11399 22353 5216 35075 20771 10702 5190 40565 20399
2332 10383 9652 1428 28945 2324 6139 13691 1500 13502 18889 1509 12619 14388 3810 14321 11084 12197 1551 724 39637 440 31016 2266 15923 24952 2902 5004 801 5405 18641 39142 452 40010 296 3739 3092 2472 33536 3077 306 31368 6593 8768 3089 307 1445 1624 10251 34999 778 35006 40934 309 21060 3109 529 8884 197 40972 2319 1601 11134 1556 32881 3072 19746 6933 4519 2071 3105 400 40974 12293 559 3304 722 32457
2333 2302 11692 2115
2334 31015 20039
2335 34495 14444 4231 11444 3315 30904 19495 6685
2336 21095 11589 21452 31661 11598 36262 31658 21826 23587 24341 23560 29442
2337 15742 2679 3196
2338 8862 8863 19121
2339 8858 16719 22772
2340 20712 8849 25051 21869 31823
2341 28757 26121 26399 27286 28877 23926 24408 23343
2342 36484 33398 24419 33390 23923 10633
2343 40820 25682 36773 24312 22522 25050
2344 29839 39718 28674 26645 24039 28742 24401
2345 821 1821 1933 16926
2346 192 6833 31 13017
2347 1937 9298 6738 8340 2396 23177 36563 13269 23788
2348 20182 36236 11140 464 3121 18520 8239 22003 718 39641 7605 1538 9529 4221 4007 3843 722 4138 1685 1684 2493 7920 1811 2525 1096 28427
2349 19112 27269 27288 35496
2350 7728 7703 19162 9800 7572 20268 32640 7573 3175 9749 4418 31881 1811 3156 7736
2351 19363 24822 15561 8988 11088 32774 34230 32773
2352 5589 14041 19737 4242 28990 12960 12921 26580 8527 17408 36105 4910 2337 1402 718 456 160 642 9187 7257 39777 6321 9139 5833
2353 28695 4246 273
2354 3261 20143 17984 12043 12036 17947 28970
2355 28458 17681 1826 34087 18336 34635
2356 23126 3574 22858
2357 12352 1050 7459 1095 28096 2341 2493 2923
2358 3107 6131 816 17740
2359 14741 27786 40738 29269 15307 28560 37164 12116 32672 15258 38730 4746 36737 26580 27464 16377 34948 17723 28466 20193 3610 13970 19630 13427 21410 12530 28557 20192 13979 26239 19638 5607 19731 15298 17828 17701 7993 13991 12201 16947 31431 27781 14798 20136 17678 36056 36815 19497 8523 26005 32227 4806 1827 39306 3152 718 18061 13215 12999 12010 3544 15263 23049 5079 28112 9778 6121 19248 4946 9478 18458 6123 39696 26013 5225 3551 3552 3549 33921 18058 4887
2360 14516 14255 25511 3044 1437 1617 35537 529 8612 478 5775 27344 7393 3068 2302 23986 2263 31582 31448 2250 10255 12322 3108 3077 3047
2361 22772 9918 17573 16721
2362 143 16309 208
2363 23614 23610 20727 22719
2364 17761 7679 9760
2365 18581 18112 14376 14353
2366 653 870 2666 31471 16646 13389 13076 822 37457 601 28996
2367 3332 1029 15106
2368 11770 9714 3205 713 17418
2369 22356 17232 34898 34897
2370 579 36592 9441 16576 13444 30194 2281 2415 1708 693 574 3836 1731 991 1712 15490 1764 4030 4541 3372 14719 571 8315 2405 3392 8262 838 821 15098 23318 20569 15175 3582 5288 26506 5287 1023 2525 14614 3250 9264 7458 35507 16938 609
2371 7548 8847 17573 31240 8861 19007 27882 9918 22777 19669
2372 10942 10787
2373 23128 9436 8264 17210 1014 1546 35623 28698 5430 34989 28370 21242 1508 32753 30618 11623
2374 17400 20710 33021 4727 29275 17042 19048
2375 24233 34855 29363 35367 34854 22371 17405 25913 25904 38820 28220 29104 35496 28217
2376 10609 4033 4643 15311 15739 15360 40829
2377 3264 1912
2378 26286 23406 26299
2379 5545 28889 13549 38664 38872 36405 23814 6735
2380 4430 7002 7169 7163 642 559 34477 11709 160 28626 14036 33276 22748 2662 8413 11141 8423 22328 2525 4545 17801
2381 32911 33072 14802 722 8543
2382 18112 14363 18579 37451 19071 17855 2773 7178 5110 5750 17442 32103 642 16252 837 827 19337 1353 19782 2018 2019 2014 829 828 30510 7209 9211 1356 1355 832 12810 822 1998 1999 824 5512 31271 13499 825 19338 16912 836 12799 37293 34810 7256 23577 17768 23624 7133 29161 14375 17858 17847 20396 19849 7289
2383 13734 22247 38799 4201 8011
2384 20844 19523 34683 8717 32657 21650 21289 1165 8095 25406
2385 51 34823 36993
2386 978 27364 28841 5879
2387 14667 25884 3401 13781 9957 13780 7031 14657 9678 14675 9666 9280 14644 17311
2388 16951 16967 27781 17982 12057 12204 837 15753 3192
2389 17406 12402
2390 4916 4887 33793 6483 3154 3607
2391 7487 11609 35127 15214
2392 8274 2924 973 7484 779 373 206 3071 187 792 27560
2393 579 11531 4039 14609 9323 3875 1060 4079 10612
2394 821 18019 722
2395 14698 21302 35207 2387 1096 20219 12745 943 15255 9297 28538 6506 26009 14767
2396 35320 20459 3261 5613 160 35324 5064 5452
2397 29085 9505 9517 14755 23814 28731
2398 23318 14416 20367
2399 14423 14429 13183 3914
2400 8043 9257 35247 6329 1229 2629 1128 1127 6171 6172 6176 6175 6182 6174 6173 6170 6731 39623 3655 6727 381 6181 6179 6180 6177 6178 39625 39628 3651 39624 39621 39627 3666 6729 3646 6184 3637 3711 1131 39567
2401 16103 3386 873 16237 3373 12340 34428 31090 2525 1726 12211 701 14925 14722 28474 3206 991 2943 1854 6520 3297 3849 8253 650 2640 11919 1766 10052 12779 2799 3382 2961 27028 3955 11754 18693 3951 945 12697 1028 1815 24943 12834
2402 32333 13640 9877 17605 20792 20790 281 20386 440 2345
2403 2220 9812 33246 35453
2404 3131 744 747 3887 29445 3849 13382
2405 3054 7358 14297 2635 2773 2748 19502 19503 34089 642 12893 559 19385 2902 14132 529 17017 194 1831 3765 8739 9821 2071 532 2467 4519 31368 3092 401 3089 309 6633 1593 4841 1795 5405 18641 3133 2472 778 1479 4657 11367 6589 5398 34612 478 11360 4629 8590
2406 18010 2664 2525 1811
2407 8017 23437 40905 5161 5158 40792 35377 4612 9358 35376 13619 20856 38557 22694 20795 34068 11664 34567 9887 5464 9880 13635 20792 5442 9862 19578 30091 20790 20796
2408 36807 29434 21098 21839 32849 30805
2409 34395 39640
2410 10880 23870 25054 29167 25903 25918 25917 26462 25905 25052 25053 31553 37384
2411 22409 21933
2412 22590 25928 38689 27232 26969 39124 23225 39344 21536 24090 27161 34408
2413 34581 19653 17498 26312 19669 7550 20395 9914
2414 29372 25520 32306 30368
2415 22438 26713 26950 25081 26486 24965 22603 23182 21948 37553 28289 22941 26484 17406
2416 22719 27201 23871 33219 24260 21913 24686 25264 22968 25238 26491 21950 33792 34214 39210 31243 21933 21917 21912 38763 22905 25738 24676 22530 22450 22669 21536 22903 22651 40871 34873 39375 23341 22662 17406
2417 8861 9918 20541
2418 28160 8847 22777 26301
2419 2930 1709 11438 1817 2666 601
2420 40158 40159 40160
2421 36509 36504 36511 40144 40742 40238
2422 497 23365 24875 6696 16223 19899 21738 9770 10480 910
2423 3382 1937 13966 15292 16560
2424 33441 34642 22609 22575 22581 22372 29305
2425 38134 21171 39399 21590 20727 37368 35054 22734 29731 21353 21163 30443 40621 28219 32237 37762 28687 35823
2426 5443 24348 3755 8018 38351 9909
2427 39095 722 2432 1538 30122 978
2428 8487 3820 35658
2429 5892 7974 8018 13752 36834 23446 27132 24369 31039 14687 9487 27153 27152 36588 32020 35648 20790 5680 4490 32330 36589 32398 20386 31001 3059 14255 32333 20792
2430 1493 18141 36135 1937 15465 9455 26705 25603 24472 4906 25318 27909 34166
2431 39767 10878 21924
2432 27054 17573 25827 29833
2433 26645 9586 39801
2434 17484 38023 26466 23112 34275 26325 27569 38801
2435 26441 22609 29527 22886 23664 25088 37394 24318 21536
2436 3835 3826 18350 655 28537 3196 3384 13404 15068 9330 1867 15055 15663 1027 19137 33874 13394 24602 33504 3852 472 2396 4113 1770 7486 628 2923 6500 7894 714 18940 944 15664 3357 3385 3390 3396 3379 1726 5112 29288 5111 20117 917 9728 6520 591 3195 12225 15632
2437 13973 14022 29289 25358 14052
2438 16679 8939 7550 20814 29362 20820 17573 9914
2439 31269 31270 2018 19783
2440 22663 24506 34078
2441 23409 26291 31077
2442 4219 10030 817 1064 9989 14793 9881 3815 2525 2667 3199 15090 2679 32161 9264 18486 1061
2443 8604 12265 8778 399
2444 21158 21321 39776 27867
2445 600 11919 11477 13437 30996 4219 3120 8153 3297 15093 2962 3250 17863 3846 597 1937 4540 8337 1728 35428 24030 614 10041 2969 3830 945 2924 10602 632 1859 1764 9481
2446 2773 5747 642 21795 29432 7125 3127 33876
2447 2771 2688
2448 6297 28330 19772 13615 14684 7977 13633 3755
2449 4362 3811 24017 36472 36622 31337 12621 34616 14329 8979 14804 32151
2450 32629 832 18630 1627 8366 9213 29415 19783 827 835 976 1393 3678 3719 28867 18191 1128 39627 39623 28035 31598 129 1322 160 722 135 134 26730 36524
2451 13043 30972 4294 40881 722 13222 28096 28097 1684 15730 3800 36696 2337 14712 2525 5172
2452 26709 995
2453 763 806 33609 307 8597 3052 6593 1589 4634 20836 11146 331 450 309 558 35008 34998
2454 31401 34426 30272 32236 38068 32709 30257
2455 39278 31404 23200 24616 31062 28208 23869 39249 24472 24471 35149 28663 31388 30250 24555 21941 30178 40488 37187 33811 37363 28219 30274 25099
2456 17405 28461 22578 21859 39474 24042
2457 26293 35067 19003 9918
2458 28772 22736 27323 27622 24400 23341 23350
2459 36183 28680 13272 37563 37568 39721 40452 27269 23697 37814
2460 15845 24590 8132 31 23869 28194 23685 32986 24098 21536
2461 34548 35061 32731 36475 30565 28687 32237 21573 31397 31160 25549 38988 28191 28194 31163 28188
2462 816 10518 28903 24327 24326 24328 30414 30412 28905 29074 28729 20575 40513
2463 35302 38229 16134 29624
2464 23222 24490 34839 23686 36391 22457 24035 27649 10882 25751 27950 22975 21920 23027 23005 24054
2465 34406 22117 28503 28514 23615 31891 39397 23297
2466 10099 10923 5475 3775 5472
2467 17757 26764 39562 16005
2468 6172 6730 6181 1127 3661 1131 1690
2469 2923 7458 6456 40140 2982 160 3133 20249 35008 35001 778 309 3099 33516 1445 2526 331 14150 194 6647 780 2319 307 305 3420 19357 3031 538 325 803 15431 32989 10374 2244 1795
2470 10689 28910 30414 29076 28731
2471 1242 415 131
2472 21168 24473 21323
2473 26155 9483 40379 38434 3442 19563 35445 8160 28419 19594 18170 6048 4398 6423 13654 28081 17803 13582 10694 15609 978 160 1236 34241 30373 8048 1405 6420 9138 128 36233 6282 3432 9026 9027 6314 9482 433 3113 415
2474 39195 128
2475 31301 32481 30285 24555 30269 32482 30270 30274 30252 21942 26850 28772 40501 28221 31284 31283
2476 556 3475 16678 18055
2477 2525 5546 1314 1609 1811 8266 19614 1503 1502 15584
2478 3013 3317 17885 2341 4227 4226 718 1996
2479 39108 38575 39176 39175 39111 39109 39110 20602 39173 39172 33963 39174 13558 14738 7928 3192 160 18555 18556 21397 21398 18557 21396 18565 21395 3606 18038
2480 12028 16971 17972 12034 17964 31421 22225 18038 23141 37243 12033 17952 160 3192 15458
2481 28481 14572 32418 14557
2482 13858 13861 13005
2483 21084 21454 16232 33637 26834 5720 1651 5719 5729 19680
2484 4007 16366 2337
2485 28511 23033 22174 30213 20754 23394 27864 28501
2486 28338 13366 33290
2487 4684 13037 667 681 3195 3235
2488 35271 16792 34226 31498 37626 3712 1288 18318 20172 2673 1352 2545 16806 25227 2540 18847 1183 5151 1128 2622 21019 8992 1247 1189 1636 1625 31494 38009 1263 1231 2457 6212 1674 10819 1120 6245
2489 9054 9064 1307 6197 15378 13532 422
2490 27154 7974 19577 33510 14592 4847 13594 6710 35926 5571 4846 19314 9893
2491 3098 13788 15384
2492 4820 4818 12123
2493 15218 3830 9471 35673 12836 12770 35124 29112 4164 1907 1884 15476 921 958 9331 18784 701 17424 29281 1772 3941 554 15213 40236 16626 1077
2494 29001 21746 32661
2495 15016 22089 30362 29937 3565 5277 5271 9991 10000 36959 35699 6984 9871 13276 5430 32457 31594 32753 1012 30116
2496 11492 16544 15977 30045 19937 16813 17137 6038 6039 17861 14370 12733 18582 13643 38015 18581 38058 17771 32524 32623 16277 5112 5116 29446 2863 642 4557 640
2497 18327 22083 26016 10671 6242 6168 1292 5633 16164 5654
2498 1496 257 34484 1482 1481 8979 6081 13690 17375
2499 15552 9241 10547 10938 13943 10914 10947 11432
2500 10131 11800 22861
2501 29872 39076
2502 19619 13204 1970 3841 6086 1881 19491 4039
2503 16025 600 30351 2032 3196
2504 4479 15765 2375 21971 12518 722 15836 13855 21513 15352 40704 9422 15351 18625
2505 21301 11141 15085 13183 2794 5172 2525
2506 20236 8535 12038 32673 4891 4894 4895 28967 12043 12034 13248 28615 28477 17986 23847 6921
2507 822 30801 35913 1104 642 28141
2508 38648 870 4706
2509 8152 627 10041 3843 15091 1772 15217 674 877 1731 12582 1861 9441 3942 4007 820 1869 13420 34041 16365 628 4179 925 924 16562 3293 16558 17514 590 8306 2961 3849 1962 854 11512
2510 16109 17594 21763
2511 19762 22489 22613
2512 22765 40730 9920 20534 40887 40885
2513 23194 23902 33315 26344 31683 32754 29529 33630
2514 2525 20874 15068 23214
2515 19003 20824 20825
2516 22931 24130 24105 23154 24450 24449 24448
2517 14588 30323 27189
2518 8931 35829 19379
2519 34537 38651 24979 23704 23865 23669 27299 35939 24897 27943 25577 40555 26620 25266 21906
2520 21858 23533 25319 26486 38159 22527 26847 38085 38871 21920 38288 22602 36776 34182
2521 11011 246 7432 266 18881 18712 18717 28901 23374 23375
2522 29306 29498 23308 29302
2523 10626 10628 31
2524 28163 23249 26308 30467 33821
2525 22805 20541 17573
2526 38471 36183 29349 40932 17406 23697
2527 36356 24933 40831
2528 23108 26386 33727 23703
2529 3356 9738 984 948 1074 10018 1053
2530 2263 15418 190 19062 12265 9359 8780 12298 30765 7353 8731 39676 39698 14263 16996 22705 1469 37037 35108
2531 35125 1101 2982 17422 1065 12745 4227 4226 27909 33538 29309 156 11719 15098 31736 12519 12526 3531 3530 15695 2525 942 3001 817 3015 2946 6052 39353 964 15678 1049 8275 20042 4205 15068
2532 23182 24179 8856 32785 21536
2533 20685 21324 21149
2534 34627 14323 15061 15226 40002 8027 14328
2535 2387 3244 15494 1820 2396 3831 7262
2536 1673 22063 6351 1675 17407 5674 2481 3671 1182 26818 26805 1188 2462 40538 32162 1134 6235 1233 1211 8260 3675 129 11387 3706 1242 34207 1138 3735 456 6253 28485 1176 39906 18915 36466 3689 26890
2537 2327 6593 557
2538 5430 1551 12518 33375 1513 12475 33537
2539 6007 8998 9009 5219 7516 13715 18626 7596 10974
2540 23314 28927 37872 14022 13993 17715 27458 12031 19509 14637 30871 12909 29289 28077 29717 40135
2541 12346 2923 701 1064 12747 29117 12847 8454
2542 16698 8010 21507
2543 30759 30007 32834 30022 29998 32836 35529 33662 29982 34435 29989 29983 31998 30006 29999
2544 244 17293 31979 35713 12290 13920 10086
2545 3154 6756 33987 3617 3607 16656
2546 17447 33650 19811 2857 2773 5083
2547 32100 31937 25012 35450
2548 2444 19464 28017 7313 51 3270 15208 11833 978 26245 18710 2337 9716 28651 32649 35473 2525 1023 1538 18769
2549 22822 20169 22815
2550 21798 21106 37732 21073 40457 3338 21099 29437
2551 11072 4430 4429 736
2552 14353 23568 20832
2553 1493 12648 1500 12481 5687 13921 18140
2554 34819 21837 3342
2555 11373 3522 8780 17012 19062 40878 10309 18658 4598 3700
2556 3133 5405 2902 5382 3059 3044 620 2467 31362 310 7348 17189 5768 3072 13682 18641
2557 1217 7533 6009
2558 8153 13165 1096 1101 8337 6673 12576 600 991 677
2559 29949 28926 13356 29950 3147 16324 13358
2560 23768 23770 11118 4667 11159
2561 19767 24349 20385 5563 13636
2562 827 5512 27937 2485
2563 266 2220 157 19099 40302 18704
2564 744 468 1933 857
2565 8931 4202 20
2566 33320 27643 24036 39664 23902 23038 24712 22534 26953 38796 36331 27502 17406 25588 24034 29724 24584 33424 23311 23293 34712 27136
2567 27076 34189 17406 22473 22369 21856 26372
2568 36035 21556 20712 21363 32478 21551 37018 21178 29754 27958 27853 39045 27849 23666 21324 21332 23030 22722
2569 242 23087 2220 25893 13275 10694 15607 35134 8183 6820 3816 19621 13349 51 3270 6455 718 12735 21673 21672 8265
2570 9920 20823 19653
2571 28178 24613 24499 26336 38787 23027 25077 29180 37762 35723 37554 23526 22370 35212 24167 36871 21605 31442 23009 24590 17406 25751 28326 22562 36196 34015 29548 26072 22940 24079 10879 38790 27604 40571 21905 22966
2572 24206 22566
2573 23218 24690 22473
2574 3263 9446 3389 2356
2575 15794 3605 13029
2576 34380 20809 22687
2577 37923 9584 27296 23350 31078 30815 40678 38852
2578 2266 763 6445 35107
2579 688 1902 27636 23995 2525 155 9775 32669 16425 4879 31705 4881 4878 31572
2580 19100 19657 19106 20809 19001
2581 30557 22825 15355 17484 29364
2582 5828 1152 2471 1294 8891 6154 211 8258 1183 31446 34777 6156 5305
2583 29842 38619 21178 38605 30206 21176 25151 22178 25427
2584 11672 10626 10627 15776 15356
2585 34614 13480 35702 12511
2586 12897 19812 12898 18482 20225
2587 20960 2193 15942 15936 1292 14949 1688 2252 6157 1637 1635 1109 23955 1644
2588 33087 37113 40862 40482 38494
2589 23419 22090 30991 1025 31408 1026 15396 25767 14587 16220 14552 14586 30876 32419
2590 13128 9944 4648 1583 410
2591 20070 18731 20029 13314 6978 3795 17904 3304 540 8266 160 34895 28133 194 18752 18775 805 324 35223 6589 316 319 317 314 315 318 4832 37130 9294 18546 17772 4598 22823 28942 11779 2673 22708 32119 559 549 309 14139 38562 35008 35001 34998 20081 6559
2592 1644 6242 2616 39337 6893 1292 11111 33972 6232 2557 39927 1194 36040 1288
2593 16575 4777 4778 8139 3217 3593
2594 3725 28731 29085 31370 39147 28724 28735
2595 2525 2662 10735 25177 10175 11295
2596 34692 34689 33082
2597 33825 29530 24587 22490 23540 8855 37779 34425 23537 17406 21536
2598 7920 7727
2599 1115 2515 1237 7443 2516 2517 1246 2183 3746
2600 1805 1257 2501 36910 11137 184 456 1189 32904 4596 1122 1188 2514 1237 3715 30063 4527 1191 5701 5788 1023 283
2601 7697 7572 7735
2602 12228 9754 1811 17667 28464 19630 8560 1500 1511 29681 13234 33668 15350 13848 4220 8906 26225 9422 33703 40811 8912 12031 9873 9871 1010 1023 1537 1286 722 8543 7797 2525 2337
2603 20603 893 697 3244 18010 873
2604 27604 40329 36872 30839 34757 29496
2605 34710 24230 23855 28295 22278
2606 8860 16726 21376
2607 19514 26904
2608 24129 24617 23154 24495
2609 35171 30447 37928 29737
2610 29750 21342 24556
2611 33821 8848
2612 23890 23869 21536 26629 22539
2613 10881 23310 24672 22929 28539
2614 821 12890 559 722
2615 22523 29102 24960
2616 8118 8119 26227 30299
2617 32697 33258 4669 32692
2618 7001 11923 25978
2619 1551 5117 13775
2620 22509 24288 22575 26693 26462 24590 17406 34428 26636 25096 35180 25097 25099 25126 21909 33630 19662 35363 40591 22883 26079 10879 38297 24046 23296 25309 23519 30599
2621 674 675 676 677 678 679
2622 22837 21178 21158
2623 15235 14791 34580
2624 22989 23397 12190 25080 21536 24488 29774 21924 23530 22958 23509 25721 21913 23154 24507 10882
2625 3311 4064 4133
2626 22706 4423 7971 21032 31039 9888 3271 283 1811 7681 14676 3405 14674 7045 20112 14664 13408 25885 17540 16597 29427 15873 7289 7127 3485 7027 13770 3484 16405 7070 23327 8195 15912
2627 1307 30847 22084 10169 210 20973 4535 2451 1636
2628 4430 9953 13783 7038 5116 17321 5111 718 9951
2629 33447 11663 11658 8282 2162 28385 5710 2451 9894 6333 33817 1811 23823
2630 18307 10507
2631 9678 10610
2632 35 37 39 8943 38 28660 38279 36628 25615 13860 13856 13015 21507
2633 29555 39322 19199
2634 9652 13661 8890 8622 527 23779 9650
2635 23269 2381 2393 4122 34357 20293
2636 23760 31411 29416 15052 34733 15537
2637 1066 2482 3915
2638 4320 39574 4324 4331
2639 515 25798 517
2640 2335 10860 2019 13176 20648 9308 32271 7384 3770 1590 791 5764 3301 7380 3105 547 38006 4458 1537
2641 6492 15737 16035 6491 17431 155 16094 31555
2642 4458 2306 2484 316 3039 4569 13798 36830 4657 559 13905 11711 194 10371 2474 15918 17055 5378 4629 1620 447 16996 4519 8299 3102 978 11058 27415 5422 3768 14238 40904 12265 20028 12310 15023 4622 17911 3072 3092 1594 3073
2643 6760 10866 29001 26207
2644 26519 7787 1811 6945 7355 11380 2460 2473 14175 6204 6637 3078 3089 3758 9840 408 6969 6372 4656 373 6826 2146 1555 529 8586 2361 5637 8674
2645 1355 14304 37085 3253 3261 978 38554 17027 1165 16176 575 4289 11749 16175
2646 17666 2525 1027
2647 21657 23622 11025
2648 12116 19737
2649 21363 21601 21323 22131 29742
2650 23341 37013 36484 29345
2651 25379 26380 31319
2652 12190 23027 23518 24686
2653 14395 11671 15771 31849
2654 32668 12415 14639 5587 4807 34828
2655 28681 37557 23641 30274 31167 29748 27107 30284 31396 30283 21941 28221 31403 35935 31284
2656 3281 29868 33735 3283 7703 7678
2657 11706 3630 20001 31495 7097 8245 2478 15380 3751 1352 14423 3800 1314 8393 5198 13511 17207 6079 28620 1023 34308 1538 15152 15150 35705 5430
2658 917 1965 4030 15491 20880 5601 8537 976 18224 8369 12175 7204 15753 23794 29943 837 31483 2337 19494
2659 22641 21862 23712 22562
2660 2484 15555 3562 31005 31004 348 358 6706 13324 5423 14175 2263 8645 1469 3094 398 1615 13161 187 2323 3880 2306 30789 198 14220 3268 3092 15487
2661 5616 8663 8792
2662 22662 27488 25080
2663 26100 10625 3591 13853
2664 2525 22010 856 8321 19138 19485 7944 1935 605 1969 2954 2959 15271 1973 3849
2665 17643 8134 15827 50 25653 17622 17619
2666 25181 21536 27136
2667 16711 21287 16727
2668 22615 22877 31696 25037 34223 24973 24486 33863 36799 21934 24497 25580 25285 32486 24646 23890 22366 40671 36776 30309 22580 21917 33562 22879 27053 26613 40242 27068 27259 23109 26126 35496 23297 26838 22657 29363 21950 10880 22667 22501 23225 28336 22719 37472 15804 8906 17406 21536 38158 22625
2669 9316 12788 14701 3914 2885 805 7484 21302 1041 878 11501 2913 913 4230 1038
2670 23825 4541 464 28976 561 4810 15111 4037 4479 17931 23831 11133 4776 37326 3982 3935 2365 2379 1933 3857 40879 14710
2671 12097 9253 2633 160 1650 7832 21795
2672 34341 36944 174 36722 34463 36945 22113 31614
2673 2347 1563 622 16997 1618 6647 5424 2266
2674 27346 20982 8501 4328
2675 30901 1843 14478 3879 15099 18682 15472 7941 8236
2676 176 192 805
2677 29090 12700 18009 18008
2678 22542 8471 3325 16983
2679 2679 3243 13506 1513
2680 18150 3451 18149 4383 5761
2681 4914 6520 613 18474 5603 2942 12702 3369 11791 12901 1609 12340 13267 2525 2969 10437 3140 2680 6751 26583 1839 7467 4003 39353 15092 18295
2682 26524 8979 14356 1309 38368 21562 1275 8838 722 643
2683 8013 31 18620 37472 17637
2684 18468 18470 18471
2685 6061 14463 39548 40382 35883 15624 15563 15585 36378 17076 15627 1683 1546 1284 17371 4996 4327
2686 29971 30039 30041 30026 30004 30377 32836 34435 29955 29982 30161 33661 30159 34728 31626 30166 29978 32834 30038 29989 33303 31625 29997 31623 33994 16601 29149 33701 25626 16600
2687 978 18178 10689 30410 29211 29216 10690 20573 30988 32929
2688 4857 26361 7476 34103 10862 19737 33796 4888 36635 14041 26579 6755 15082 33906 37711 34470 7868 21399 16846 17679 10868 5027
2689 33506 7959 8273 11797 13165 4128 9269 20042 15218 3397 37241
2690 5353 5347 2573 31787 18933
2691 4469 4535 1691 16310 40302 9197 35671 16312
2692 23273 5202 1277 27398 1500
2693 6188 23949 10673 1153
2694 5287 3292 7572 3177 39023
2695 9924 10037 3360 991 15270 11106 1711 19504 2525 283 9862 31192 3755 3756 24350 24353 38351 24355 17745 31186 4490
2696 17 4689 26228 15774 15768 17629 15770 30123 30450 8940 10647 10648 32 33 39685 10621 15783 15784 10620 30128 10619 4684 21501 18625 21499 15788 3598 15780 49 8004 15829 15826 16689 16 3601 8918 10660 8906
2697 8447 1496 5947
2698 25456 18585 19848 14370 38426 5088 7177 642 34971 2701 7179
2699 4818 16601 33701 21995 1029 8966 2525
2700 2864 2835 28720 7292 7291 33746 33877 17825 2834 16248 2842 2704
2701 775 3300 307 4657 1706 559 12199 23841 33666 36055 717 11880 20121 2341
2702 16637 35216 4725
2703 3899 1995 11079 15276 4063 3422 7744
2704 9163 35598 141 10966 980 643 978 4207 14920 2662 51 1543 10694 6991
2705 17875 16711 19670 20339
2706 16156 21255 16140
2707 14315 28361 12017
2708 18982 36181 38543 37278 12369 31711 5172 29678 3800 1509 36522 141 718 17484 26466 13272 40378
2709 15938 3490
2710 9989 12900 1027 6505 12694 2525 2337
2711 8474 32621 8458 5131 1537 12727 39506 29252
2712 34722 31932 19661
2713 29254 14321 1315
2714 7339 7917 7918 15595 7619 19470
2715 33883 18528 9314 666
2716 8573 2660 6348 38656 39177 3458 22690 1674
2717 20712 25306 22187
2718 2064 2360 2319 38955 18644 9877 20801 20386 9882 141 37876 2363 6790
2719 35564 39245
2720 7773 23131 4297 23132 981 10685
2721 2664 1933 15092 15089 4092 9270 2396 2958 21971 12591
2722 28023 25247 24301 22554 25738 22423 29190 12262 8444 8486 1506 17406
2723 515 492 503 910 275 15010 18136 15009 15008 35550 10805 14310
2724 9673 11982 19140 7832 2341 4430 4429 7064 17319 9662 9664 36241 36684 14766 5112 10610 16293 7055 40825 7070 31835
2725 13027 19759 10628 8135 4680 15857 3605 37486 36512 26112 11668 11674 11673
2726 2201 11806 9978 35260 21034
2727 24767 21199 559 11115 4453 17892 5704 9931 4370 32367
2728 7109 17427 9272 20244 36425 1088 11503 1918 14456 661
2729 38333 26689 22522 29780 22453 22921 28246 17406 9452
2730 20608 36528 2014 11831 1165 26556 40263 6859
2731 3504 18250 19028 2752 2337 21080 2769
2732 32539 9181 13542 2702 31833 5083 5751 14745 7144 5750 17861 5755 7290
2733 2525 31407 7748
2734 13540 16256 14381 16764 7287 25962
2735 12063 12064 12061 12060 12066 20151 30143 7457 8542 17978 30374 12043 22229
2736 11720 38802 5131 1500
2737 2644 33610 17130 14829 20380 714 9271 3369 1874 15078 35291 11785 39909 16272 16411 19621 35699 141 2908 2525 26570 837 21436
2738 9432 19749 2524 14863 2930
2739 37883 27584 22827 17406 1629 5019 4462
2740 27658 22120 24033 28664 26401 17406
2741 15149 5435
2742 3736 16986 2061 176 34594 17709 6589 5405 9650 40966 437 38111
2743 25124 27305 27511 21536 23341 31715
2744 19109 31077
2745 5149 2427 4432 3758 25487
2746 36788 904 12439 31971 13365 5195 5430 20615 23044
2747 30597 21126 23867
2748 18798 28737 6454 11730
2749 32376 31968 1551 725 575 722 28573 1500 17279 12998
2750 718 2976 7933 141 9752
2751 14829 14329 5430
2752 32689 20336 35560
2753 11756 11621 11746 1165 1173 4924 35551 38042 19956 19703 19664
2754 28464 17716 26869
2755 20758 25955 2533
2756 17815 25792 10523
2757 4361 1551 718 4284 242 32670
2758 4039 1995 3370 4412 7423 16242 3811 8112 15743 39546
2759 6748 6747 30525 12104 30141 34797 7822 19512 33277 17669 29697 5588 20232 34888 4764 3616 37082 39529 20522 36674 8371 2019
2760 15600 1609 2337 9658 26761 1128
2761 2835 7242 5114 19809
2762 1421 10366 20025 547 529 293 2099 2067 6981 6593 35007 40949 8608 8593 34644 8622 11116 12327 4519 5386 2155 405 2526 13306 6931 11112 774 36809 6589 549 3070 20034 410 35361
2763 1708 3828 18051 4061 2944 3419 2493 11522 15490 17923 30522 3309 3424 29935 2525 1753 2980
2764 6558 7370 30748 8593 4519 13323 12316 16519 17060 805 5682 559 15344 7209 837 6928 28953 17053 35001 38111 1563 1571 1564
2765 34953 8711 8704
2766 7752 4479
2767 17034 17591 642
2768 35448 6569 28404
2769 10113 10908 17553
2770 10689 3261 34119 10694 29554
2771 8802 18658 18745 8688 2263 6970 8792 8678 8602 2510 2266 9650 8770 37613 1207 8052 8664 458 18574 2190 3022 12185 12277 13152 11709 8828 29235 11164 3784 8731 34043 8632 28949 18764 6976 9359 10298 35108 8053 28108 13151 10337 39676 2895 8066 13828 4575 190 8613 30288 9291 206 11112 13306 35907 6624 8699 13883 13884 8631 18550 8682 13340 14208 14290 18657 2067 553 208 8597 6805 10384 8800 9932 26864 34950 8773 8795
2772 25487 39298 40111
2773 711 2403
2774 12415 18630 2352 20162 7649 34143 39449 4888 5603 4863 2332
2775 25504 16815
2776 8341 1843 31516 917 4204 2395 7758 7944 473 1870 7262 3328 6520 839 2525 141 18990 1609 4107 6839 8153 4109 8308 2957 2383
2777 3862 2356 1875 593 26583 23839 13434 571 35460 19050 19095 34513 30347 3307 543 542
2778 25834 31535 25852 20825
2779 30930 30170 27993 22454 21536
2780 33431 25772 22522 37382 12190
2781 27707 20748 21158 20733 40567 32709 29826 35875 9918 40887 9920 22449 17406
2782 27288 38821 29137 36601 39092 23107 23360 27516 29837 34165
2783 18022 4280 29670 275 24361 39876
2784 20539 31306 22800 7550
2785 33202 35936 30263 21147 31399
2786 31485 1170 27975 26933 29576 8219 18306 23805 13964 19918 10319 19974 20949 19916 19882 19945 26930 15975
2787 13272 37702 32082 17406 27168
2788 718 11891 16989 2314 13922 11887 10826 3012 29393 35328 8348 3549 12438 30775 32546 14589 35657 16305 36915 19864 5231 9476 19178 35509 18448 23067 38328 19254 19187 19222 8170 12013 19541 6121 13066 20423 10082 11048 20416 4974 9776
2789 26317 25652 37914 8119 8132 17636 17637 19761 20123 33480 18962 13033 11
2790 10880 26437 35308 21913 23717 22968 37140 29800 39481 34429 24070 21891 22949 37748
2791 3120 31973 468 2382 35220 16609 5094 2337 6844 3915 15132 4043 5057 32892 2948 2938 1840 15218 8235 8305 3973 1726 1897 2968 1857 2944 12336 15115 8337 2525 615 3366 3262 3926 707 7947 4900 4149 149 679 881 564 9325 3862 11797 6479 20212 609 35507 991 459 870 14454 2380 147 152 2664 8139 19485 571 4076 3898 13501 11695 3392 597 11095 8269 9328 11471 8142 145 18528 6751 2637 818 4111 3323 22021 714 6520 652 7262 9270 15742 39609 3962 39756 2947 18673 1843 4344 4033 1029 3533 146 4230 3322 605 30349
2792 37268 33826 26435 22901 24454 23234 22973 21536 24965 28274 36882 31089 17406 25275 26405 24492 21948 32721
2793 26691 21948 28218
2794 1268 13489 8446 4712 38648 6668 13664 722
2795 208 2362 1585 189 793 5703 6810 187 186 1591 2142 552 201 176 2674 7347 538 27779 14041 17066
2796 25345 21538 21551 22732
2797 36995 34955 37629 34680 36612 34957 5922 34960 36665
2798 18702 25396
2799 1538 39369 829
2800 4610 192 1440 205 2484 791 307 814 4608
2801 14687 32017 19984
2802 9855 9912 27138 281 31001 27609 27128 3755 32020 31036 32023 31201 35647 24350 3756 27132 4490
2803 26078 26472 27053 35949
2804 7901 6687 10435 674 2635 5246
2805 5615 5300 2263 2510 2265 11880 718 14285 5639 28628 2067 3765 20034 8155 34644 129 375 3024 309 11697 15522 12269 17047 20388 12552 11712 559 22298 11935 2971 18433 9363 1624 13923
2806 5570 1459 11652 9848 9864 21664 2435 7765 3782
2807 25801 31227 24843 31848 25795 9769 20487 23364 26515 13956 32263 32801 23363 32265 32264 18533 26924 18513 10512 24842 901 21733 34503 34062 32591 13566 9541 9542 28314 37199 10487 14078 29627 26926 26927
2808 1638 2175 16475 5683 21041 5629 25222 6914 7447 6184 3655 1127 6170 16800 15933
2809 642 7157 7169
2810 1537 17134 1287 1236 1541 281 2363 160 39042 2673 4614 15062 17073 1546 23133 19937 4280 35326 18495 10813 12961 1655 3551 17034 5225 13482 14312 7335
2811 22578 17405 22623 27021 28293 39596 35201 35061
2812 2121 40866 13906 10236 620 32921 2247 205 294 18656 1584 1570 277 396 18398 7383 19832 316 318 296 3093 33525 24929 2323 5015 1582 18391 3766 1567
2813 9529 1538 160
2814 4994 3800 8455 1528 7120 26275 8404 35628 13510 5430 1513 258 257 1526 256 283 2635 598 6747 36736 2337 11961 3191 141 7453
2815 16655 4824 20482 6776 16855 4822 12105 10955 4764 3616 17840 29687 8530 12925 33677 37303
2816 13179 10041 35507 944 1988 624 580 2969 3846 4109 1029 17648 3252 18338 20886 10607 14711 3851
2817 10223 15552 5501 22849 13063 10112 18870
2818 9775 28452 1268 15015 870 13501 2525
2819 31127 16737 30446 20823
2820 23858 22990 30313
2821 4411 12686 4214 18466 2922 6508 937 2396 22559 12736 35998 2911 543 35205 1067 1879 8251 2525 22803 30121 26831 36718 12954 4236 12953
2822 32550 623 34592 4531 18799 13107 194 3070
2823 3634 2427 6439 32926 1644
2824 32642 1488 32375 28700 6081 28646 39884 17161 8451 3294 17305
2825 4027 4775 1930 31691 4101 4776 13415 2525 4163 1106 1892 7966 655 1918 1909 1943 4071 564 1739 3363 8325 15012 16621 26009 3945 18147 2679 29898 31469 602 1933 4160 1843 20220 16645 17999 14597 1844 28537 3851 35266 12577 34515 1865 1087 17997 15070 16561 21410 27768 5136 11131 16363 24604 2369 6751 11536 2959 8014 1925 19467 16352 4118 20407 36784 3245 6529 5114 17312 9668 35086 14637 3982 3195 3196 4003 10047 9720 7759 4119 3239 2365 2372 2357 30082 12695 1217 38855 10802 7608 16206 7601 6012 7606 3191 3220 628 917 1985 13955 34526 4033
2826 10556 10289 10853 18234 10128 5214
2827 1436 14840 1128
2828 5746 13539 19029 7281 7155 2816 40431 7290 7135 12899 7136 12898 19812 12897 7137 12612 642 12893 30522 14529 7271 36582 7125
2829 20951 14550 15399 21263 23619 14529 30324 17480
2830 10902 11324 11398 28001 25175 38538 22862 10187 13645 10155
2831 4210 11642
2832 7125 32536 7282 7303 2772
2833 21266 9904 5443
2834 25668 25260 9452
2835 5452 19706 12450 25816 23081 718 25788 16031 14417 13273 3563 22093 18129 1021 11719 14434 1023 14423 8906 21475 36229
2836 5305 6813 192 2084 2168 26520 5168 346 6720 8155 34943
2837 11685 11684 11677
2838 20918 18562 34219
2839 1463 9466 1494 1496 4994 1493 12655 6733 28645 722 3304 176 11367 406 5015 194 28228 410 27827 397 32923 32924 13798 12171 2159 12182 6372 39928 4657 32210 4646 300 620 549 368 3268 537 6609 2526 2252 4519 3092 2189 5769 2483 1706 5707 198 5617 6593 13339 38638 1352 12095 32217 197 11339 15901
2840 713 1938 991 710 1937 2286 2925 1657 628 2045 4033 741
2841 18631 30345
2842 2662 16110 9343 1064 822 3419 11680 33719 7832
2843 176 5391 10351 12185 4623 9528 1708 3872 559 4650
2844 5172 17430 9894 283 10694 3409 718 1537 722
2845 17335 1537 13599
2846 2908 2679 1076 2525 3898 945 2404 8336 2962 1811 9772 6052 16954 30349 10694 11797 4430 39353
2847 21117 20754
2848 28178 22572 22966
2849 99 17248 7537 85 4673 5991 7539
2850 21489 21509 15452 15354 15853 3591 15351 15359 21481 13859 40811 13854 13005 18623 25617 13855 13860 18625 21484 13851 20890 15353
2851 25312 21934 39381 13267 17406 34541 32967 40748 34274 26651
2852 37495 21324 21342 21534 33810 21158 39873
2853 26129 32234 22415 31284
2854 31284 29333 31398
2855 25924 26693 22485 23895 22387 34870 21536 35484 23184
2856 31217 39581 27076 22380
2857 30259 31292 31388 30274 35936 33201 29837 24555 24466 49 8013 8921 8922 24965 25904 22723 30252 33261
2858 29856 35181
2859 20097 36746 35878 28695 34308 20091 7318 242 261 38515 37738 4278 18597 18027 4316
2860 8013 4687 38350 23117
2861 9571 5877 33037
2862 4946 5268 31851 35321
2863 1014 10003 18043
2864 22380 24235 24224 10882 21924 25260 21154 23028
2865 37704 40361 15711
2866 5438 5339 283 2337
2867 21369 20541 9918
2868 1659 32852 5732 21798 11578 7754 642 1811
2869 14883 16593 17787 12893 643 15035 18251
2870 23685 26089 39866
2871 31594 37239 36158 3292 11880 32337 141 12634 1537 31277 1546 26529 17305 1937 5168 2662 17161 718 2525
2872 5147 1336 19595 33007 4477 3450
2873 4452 2868 2867 17935 17817 17852 7252 23572 3402 7067 9281 3407 3401 3405 7033 27331 10085 7145 7273 5751 17845 12614 9189 7142 38013 19827 14379 2746 5100 26042 17777 7171 7183 2689 2863 19842 2690 2687 33787 36719 5088
2874 107 83 7497 126
2875 19007 20812 34399 27882 16711
2876 22365 36067 27972 22405 22432 40775 40812 40865 22990 27071 39705
2877 22834 32709 25877 26095 26717
2878 8095 8714 30777 8713 12438 19157 20553
2879 34965 30114 33450 15668 28445 17475
2880 10043 1076 5094 21433 17956 17976 15458 3192 2525 3263 3933 600
2881 35499 19007 23791 8865
2882 32148 16338 34041
2883 30168 40044 26783
2884 23028 22974 33335 27169 38895 24668 22887 24224 22928 24179 36402 27957 22634 22883 25913 21943 23397 4202 22913 21142 21128 22627 36860 22644 25600 12190 25309 34642 37359 23002 21536 23900 25914 25899 38228 30222 24979 24560 21696 17406 4194
2885 10472 32790 18305 1169 160 17754 17752 5462 22357 13768
2886 29412 17461 3288
2887 2331 5520 19309 14637 2011 16920 33895 835
2888 17577 35067 21375
2889 11601 1650 3419
2890 7415 2436 35347 3817 5131 38104 40236 14762 2679 6052 19748 9316
2891 4653 2360 20274 4470 1192
2892 34936 23620 15401 14559 36093
2893 26346 29722 29721 24712 21948 25728 25157
2894 10829 10825 40532 7343 11867 37430 38349
2895 2649 21061 3008 8412 13463
2896 5199 5186 5185 37143 33556 5195 5196 33346 36368 17082 12477 22858 19287 5202 17201 35842 1500 5203 1537 18444 18445 17135 36259
2897 17406 33604 33614 34429 37190 37445 37934 34250
2898 24116 23221 23397 35099
2899 11831 6672 20937 6670 1165
2900 28324 21573 38077
2901 2337 13021 37352 628 2525 1538
2902 27787 27786 32297 4910 16846 2334 14791 13245 21400
2903 17571 9918 32580
2904 12079 75 28020 8379 7535 5990 109 101 1215 126 21639 16830 7531 38642 31889 6008 4674 8352
2905 7335 15136 12208 17379 28987 14324 8426
2906 21644 18797 5942
2907 1807 33040 31449 1686
2908 40081 1255 6933 29232 1541 160 23588
2909 22719 24046 10877
2910 1551 31594 17363 8484 33556 1495 17216 31179
2911 26283 19827 12733 28720 13920 2768 7289 6837 639 5084 31493 40844 39183 19806 16771 2711 19555 17445 17833 2765 4341
2912 17844 9235 13177 33886 38121 34734 13700 40062 19336 27783 20040 7209 16914 18290 16913 824 36133 36217 36672 16915 29397 34732 1358 2533 18334 5593 35887 13174
2913 1650 2525 33439
2914 26153 422 19566 5814 5833 5699
2915 39791 9421 3324 18446 21681 5141 1500 36663 17093 17081 3409
2916 11181 11188 11184 37286 51 36125 40809 10994
2917 1811 7725 36435 7572 2541 546 160 978 29965 3261 31457 17754 10460
2918 10804 30393 1609
2919 498 14877 501 10478 24866 5359 26180 5361 5172 14437
2920 26570 16260 26863 16311 1650
2921 1329 10787 10722
2922 29913 542 543 31466 10012 36626 466 16659 7905
2923 3618 4902 36941 6757
2924 14450 36257 14710
2925 8309 9503
2926 34447 31098 17405 24079
2927 40714 14443 12869 12838 33280 37003 25357 29913
2928 566 2954 5058 15494 888 3880 1969
2929 8704 8723 25443 8095 12678 30973
2930 2920 3973 31516 2383 2415 15475 9430 12559 13206 2980 2405 7944 870 1842
2931 13813 7827 14045 14008 38729 35847 8519 29686 17260 4162 821 11860 4895 4893 4900 4891 30198 28967 4859 33982 3261 19494 2525 17728 12976 15112 14038 12115 14640 5053 12958 15001 16624 3607 12106 18561 3617 4785 16643 26742 3610 33807 32408 5589 7994 7907 12062 14010 2337 40462 26831
2932 17990 20870 17989 15140
2933 17290 14558 14586 17481 32033
2934 10554 21846 10547 11293 10836
2935 1843 30107 744 3395
2936 6733 12626 1683 15060 5172 15513 38648 27801 4000 12988 2963 12982 12960 12959 18979
2937 14812 20334 20356 14810
2938 28019 109 57 5527 5556
2939 9332 7967 2963 3969 2973 35073 12200 571 15075 2657 6842
2940 35609 8722 19539 19034 4663 37940 28000
2941 5132 17740 17735 14806 893 35968 8128 3297 3933 2922 16242 9298 2954
2942 894 15068 2389
2943 37821 21937 37824 26689
2944 34389 34106
2945 23297 23387 38375
2946 13855 13861 18057
2947 29189 32741
2948 40321 25108 22497 29558 17406 837 822 27784
2949 25116 31811 22731 22440 28277 21522 34010 22523 24195 24076 24318 23293 26094 23232 23540 31944 21859 23003 23715 24427
2950 24018 1537 4289
2951 31 37258 15822 11
2952 39771 31522 34400
2953 23106 23297 27511
2954 25698 21172 29520 21620 22149
2955 27923 31816 31905 27657 38953 26484 28285 22400 8845
2956 24032 40508 17406 37359 14691 20980 40242
2957 23108 33271 39289
2958 20720 21691 23031 21178
2959 22832 24042 21905 21145 36860 30906
2960 21672 21673 1017 9995 22092 9994 12525 18131 17211 12524 18130 1020 15144 5287 5288 1015 40737 40231 3171
2961 25309 27588 23397 22664 29106 27623 40775 30170 25074 22361 27163 28461
2962 39892 6107 5445 2363 160 4319 262 32893 31434 35185 26752 714 6664 7940 970 675 11789 1878 1752 20707 18782 12706 12707 29128 2525 718 4294 247 18029 29258 7305 35849 4246 36269 40853 19073
2963 30441 32709 40367
2964 27901 23022 22651 35892 21948 29941 38690 27076 22919 24430 22578 22634 23311
2965 20951 15848 32467 8131 25530 40376 8009 8913 8013
2966 24011 36552 38037 21739 25793 34468 20588 38891 24874 32266 39323 35517 23131 23132 37766 165
2967 39814 38841 24097 38098
2968 13926 19257 40547 11930
2969 12050 5094 3296 34005
2970 3212 7666 978 33620 30754 17749 3221
2971 917 992 9296 2365
2972 8622 14234 11144 14814 6581 6942 2269 2242 6600 40291 40020 5410 2323
2973 21669 15626 36400 35621 37327 6076
2974 21948 23500 21536 26615 27989 26472 23674
2975 2191 559 3021 28228 3092
2976 2492 942 1051 12568 12730 3196
2977 21181 27722 24079
2978 16639 16665 20148 37235 6756 3618 4821 37145 16637 4725 4823 4791 34024 4792 4798 16853 16875 6747 13287 5515 18704 22762 5326
2979 15006 3240 3378 2392 15908 892
2980 670 10019 17437 2387 743 35911 20364 40233
2981 2676 11531 2922 2493 12260 27381 20980 6076 2283
2982 22376 21536 10880 25901 25910 29507 32505 24639 10883 28195 34542
2983 22684 8847 16711
2984 2540 1417 12097
2985 29627 26928
2986 6858 2019 20637 33399
2987 34098 30025 30498
2988 29606 31343 21261 16135 27908 16141
2989 14043 14027 17802
2990 23559 28345 21450 21830
2991 15709 38129 15705 37820 39202 12391 21536 33250 22406 26673 31700 25702 26946 24979 25057 22437 22835 22651 23207 12188 38139 35281 36174
2992 17653 20880 2929 1076 1816 3617 28553
2993 17514 1708 744 3328 632 543 669 945 4082 598 2956 6525 4344 11462
2994 1421 805 801 12317 3133 14235 3420 12539 2061 9868 778 547 307 2902 194 6647 306 15988
2995 37406 11742 36804 34093 5569 20176 2570
2996 30222 22415 25286 23901
2997 22719 29855 25088 28174 22834 22948
2998 30886 8859 22771 31694 22780 34534
2999 2310 4609 559 1755 1843 554 4035 16340 10031 3195 2635 837 10075 2971 2337 21300 1617 5397 1473 3300
3000 2276 4011
3001 7112 14933 3707 3138 2895 756 176
3002 18336 12858 34353
3003 5928 11884 18385 27369 36996 14085 18373
3004 11888 18878 11877 13696 17508 26898 23599
3005 18382 14076 14081 5900 28847
3006 3584 3071 3088 23081 5452 4874 8953
3007 7185 7290 16590 34033 29447 17843 17591 16594 2751 2872 2725 32369 36719 7228
3008 10805 8434
3009 1700 3914 1843 13795 160 14843 18264 34943 6889 9499 1647 375 2558 34129 9257 2225
3010 3615 25992
3011 14171 452 8294 1569 16982 10383 9630 9363 203 2067 28954 12169 15881 2252 39224
3012 35622 26945 2337 19342 30845 1165 1511 722 15765 15370
3013 1366 1418 1390 1386 1385 1383 1384 1377 11652 28410 2662 160 38966 19620
3014 11982 2662 10328 13865 3430 642
3015 1553 1477 2238
3016 2525 814 5174
3017 1072 1039 15868 832
3018 39141 3019 8596 13139
3019 15410 32218 18751 11373 12321 9822 17904 10323 23983 37074 1117
3020 21270 356 8218 4537 2230 6901 2242
3021 9593 23505
3022 2432 19229 297 3092 6589 3087 11648 9877 35007 8890
3023 1906 1859 855 15075
3024 13915 2510 15235 12031 19309 8526 3192 16963 14742 2337 559 529 40449 5423 10388 5012 2309 10382
3025 5699 6289 1644 3634 6262 6439
3026 10780 10932 10923 10783 10530 10529 10721
3027 1853 31250 18304 20157 4053 28149 13197 14723 11466 35103 29129 16611 22052 3380 11771 15130 14607 20331 11106 18349 15129 871 3963 23286 10044 15871 23828 14705 4097 1974 30996 35221 11099 14602 28147 882 15274 30901 15264 16022 22696 32289 16032 11917 16195 20212 654 11552 7951 9262 22859 753 32287 2028 3876 1069 3975 25402 3976 752 16606 1950 706 12756 37328 3893 1894 1965 7965 7966 1881 14596 14670 5136 13844 3347 7938 7956 23570 14672 12332 3310 16610 1933 11541 12705 14707 13445 1823 10051 16362 18344 9434 13185 3372 728 543 735 542 878 35205 2952 820 2387 1710 7261 13216 32285 616 6511 14780 857 736 23548 6658 646 35206 12739 12774 12772 705 1031 867 1731 3868 4027 15494 5059 31692 1067 11130 718 38101 48 36933 4194
3028 2963 561 141
3029 22708 1174 1128
3030 2337 27780 14855 15650
3031 34227 32678
3032 269 270 263 4257 4330 10694 18512 32593 13565 35133 28111 242 18495 4243 7776 2220 9812 9793 4246 18596 36790 13879 39694 272 271 267 36426 4295 4318 28365 4302 247 9578 266 246 268 34631
3033 20231 25847 16425 16426
3034 4808 17519 4899 4854
3035 22365 22719 22387
3036 15171 8425 13363 1023
3037 25074 17405 35367 26370 29195 22413 28327 23655 23656 22669 26382 36733 25077 27046 31821 23715 32507 25103 23535 22651 28216
3038 40910 22549 29331 22440 22831 22524 22365 24190 29812 24169 25737 22404 22410 24750 9454 40622 22719 8494 1509 17352 17406 40036
3039 5271 1017 5279 5280 5277 280 12523 3577
3040 18962 26114 13002 10624 33749 36417 17630
3041 13597 13598 6521 31884 25793 575 1023
3042 29772 26337 22139 35450 22635 27218 24264 22831 29039 22830 27631 25690 22719
3043 22902 25116 26633 28811 40676 24921 24916 24894 33383
3044 280 5279 5280 12523 3577 6990 6988
3045 22413 28179 22878
3046 21918 22380 24979
3047 559 6147 4401 21009 2525 8597 14283 33356 1831 8879 1563 300 176 3092 15990 10349 2289 3268 3022 3094 405 24782 11702 2472 478 8612 39228 7972 6931 529 11711 1422 4629 2256 5403 403 3059 620 16497 3105 1795 3052 3098 2474 309 1620 1436 277 30100 189
3048 15355 34611 26140 37258
3049 17576 30476 31567
3050 40886 35166 9918
3051 2748 32431 2749 5740 642 978 29572 19681 18122 18123 1169 575
3052 27469 26851 37247 25913 27051 26710
3053 2372 2687 4562 642
3054 10837 15540 5505 10559 10724 5213 37834 37836 5215 37833 11223 11221 11811 15551 17563
3055 13368 19705
3056 20520 23742 11735 34092 4453 6704 38539 33040 22815 33656 21204 5161 38900 28393 15902
3057 34330 51 10694 39069 4294 16989 12438
3058 21933 26378 21921 32714 25077 22578 27947 26710 29820 21934 40865 22553 22990 23665 26085 21154
3059 9450 4654 13563 307 3071 17219
3060 23274 8442 3190
3061 2337 39449 33793 32048
3062 20426 5237 11938 8996 10998
3063 5546 12932 39782 15612
3064 15158 21849 23601 35463 12726 14378
3065 9531 9534 39901 14744
3066 645 644
3067 2276 3382 48 15794 14511 1755
3068 179 2179 222 15368 5692 3699 28382 1128 1127 6170 6177 6178 6179 6180 6181 3655 6171 6172 6174 6173 6182 6175 6176 4584 8615 192 10355 2319 3031 17187 6704 28396 12273 8802 2427 3644 3646 39625 6184 3635 1130 6726 381 3648 36112
3069 30532 31006 33353 11355
3070 17164 8362 10991 8073 10961 8350 13715 8094 8106 11345 39559
3071 14833 5131 3409 17095 1504 1546 6081 23835 6076 25938 11823 1306 7074 10551 10562 10564 10559 10565 10561 11286 11281 11651
3072 16542 275 30836
3073 4421 11709 20072 31655 18731 20077 20511 33656
3074 202 15487 692 3200 6738
3075 33634 2526 12140 4519 13907 14141
3076 20835 1292
3077 4430 3322
3078 31881 11864 9762 9763 36244 27362 4235 3159 1811 31674 3156
3079 26602 10879 22876 23301 23872 24644 24209 22965
3080 9822 12321 523 8674 19067 32916 20566 10333 13874 1571 10343 3092 8052 13915 32218 1117 454 6702
3081 37499 14750 30074 30076 3290 14755
3082 21413 40299 32376
3083 1350 14162 16802 18614 18610 128 7113 2536 214 211 1419 6334 16456 33680 14838 1294 12667 6158 6916 23772 4363
3084 5284 25631 9872 20814
3085 14744 5079 25896
3086 8547 31406
3087 20758 38858 29573
3088 559 141 7627
3089 20616 6668 6861 6862 4039 5091 13542 623 7745
3090 5111 14668 17316 9677 4428 16294 16291
3091 2473 14283 39042 13653 24778 8021 4670 19011 26753 33055 20270 3012 19423 19617 35874 160 1541 1540 3261
3092 15656 4712 155 1082
3093 18467 18098 10070 25777 4946 10062 10080 5452 6121 5343 2337 3607 30919 14846 6068 23076 34701 19223
3094 8147 32660 13953 2800 18477 628 34963 25990 25370 20121 2635 841 1096 4545 29272 842
3095 5604 35121 4908 2940
3096 283 1831 545
3097 7294 2877 7288 15872 641 2692
3098 17481 33625 14555
3099 7012 25885 5112 7013 15718
3100 3154 2635 1101 3223 1050 2525 39791 32175 13496
3101 4891 32673
3102 24204 33336 27199 22379 31593
3103 16157 37840 16121 29608 35302 21257
3104 15815 13021 22245 8915
3105 34319 40641 37049 40823 34318 40483 37118 40121 32962 39915 40485 40167 40164 38494 31750 37046 31749 37053 39564 31748 40176 39948 37054 40273 37063 37120 39942 37058 39615 39031 37059 40642
3106 31903 31400 30250 24555 30259
3107 16742 20815 16721 16732 30811 35166 8861 40886 40887 22764 30570 17571 9920 10626 10627
3108 30009 33659 30025 29958 30007 30013
3109 23740 2067 33376 8596 10236 13915
3110 33570 21536 33566
3111 4252 34134 37306 4294 12432 17045 6959 7439 34096 10814 20413 4295 4318 31560
3112 17772 7983 8637
3113 31949 37715 27218 22406 23542 24264 22430 29788 23671 29812 23540 22919 25001 25080 24296
3114 18505 15348 978 51 1609 4294 1023 160
3115 1811 8192 14646 16407 9664 4430 160 28313 39641 24382 24384 3736 32211 8189 11709 3022 16986 559 1169 517 31856 24946 14392 30489 20898 29627 10519 14880 19897 19370 19896 26200 35956 493 161 10524 24794 35453 13344 170 21737 24800 19900 11488 23457
3116 22413 22623 10882 31956 12193 22387 21948 23111 22187 22959 22578 23234 25116 23511 27886 22919 32512 31083 22831 25543 27500 22579 22941 12192
3117 16701 10644 4684 3597 16694 15445 8001 25620 10660 15768 31 22489 36631
3118 17247 32465 31675
3119 20719 31404 21941 31906 31300 25099 30274 30251 21886 31284 31402 40705 24555 28221 35935 26129
3120 21410 20196 37872 12223 19279 27790 7855 15456 16957 28739 18289 830 22038 822 30146 3610
3121 1840 3907 13208 870 2525 718 10689 28907 29211 32933
3122 12759 700 22715 25811 11555 16630 11770
3123 14384 30140 4557 642 18341 19500 34033
3124 16711 7546 30468 9914 25853 22773
3125 20980 14318 32530 12182 2252
3126 34762 25649 36932
3127 26569 39238 35404 36554 37423 39239 4926 34465 39235 165 19965 19966
3128 27391 978 5452 22284 20431 17031 30615 5256 10069 5453 4972
3129 6914 2193 6913 28387 15968 1241 6888 2207 1236 16846 14791 17849 160 39194 1696 28331 15966 18223 15965 15441 1693 6114 1242 2337
3130 5456 12222
3131 18818 2941 30128
3132 2337 1165 30029 1168 1169 19727 30001 30498
3133 28431 28001 10914 1165
3134 2971 21289 9163 1320
3135 5696 6232 2522 21187 1127
3136 21948 35150 22719 24228 23036 23396 25116 23504 40359 32463 22526 27928 35784 21901 24180 25904 22406 21856 22626 22585 23715 12193
3137 22492 22919 25188 24535 23705 21933 21516 22397 22389 21126 22387 29547 22615 22385 21536 23297
3138 4111 17415 2662 18857 722 23271 255 11971 4030 14467 15215 3201 2394 16765 3613 31585 8274 2637 8310 23278 14855 34253 28622 19940 4995 5172 6040 9925 31772 628 1755
3139 30065 19346 9248 16804 18935 1676 38798
3140 733 15054 15664
3141 36047 33495 14755 32573
3142 25274 26126 30223 24493 25738 22428 22539
3143 5705 1126 6351 2628 3735 1307 1258
3144 24965 34590 34602 36032 22553 23234 33862 17406
3145 12877 4030 2044 1843 3372 722 3889 15491 36000 12694 3888 3956 11469 2400 952 953
3146 22772 9920 29163 29737
3147 12413 28964 7404 27361
3148 1310 5435 251 33345 269
3149 11748 3588 13719 30499
3150 11838 7120 17110 5198 1513 12491 12487 258 257 1526 256 1509 3803 1503 1493 8426 19287 16334 561 598 2525 3192 18038 4702 16965 16964 16952 17946 9656 7468 17972 29889 16332 36105
3151 6779 16377 6783
3152 4994 3409 17287 8468 1488 20467 6076 16780 1551 821 11104 155 9775 13192 2927 38865 17925 1965 11774 30992 2525
3153 11166 8297 2252 805 2461 2301 8189 20839 13139 558 3788 6970 208 15992 33531 9643 2306 33376 9492 310 9364 24775 13669 39840 6379 774 39698 27343 559
3154 10074 17193 25781 4945 19192
3155 26531 8564 1284 32619 3409 1680 1687 12651 2933 27181
3156 30843 6355 31605 36967 8284 34439 40267 3710 5350 18318 29408 2499 6099 34146
3157 8478 12651 18519 6082 13119 13276
3158 2167 2337 1650 40581 21805 2662 4418 546
3159 3287 29413 3286
3160 38865 3607 2927
3161 37352 13472 33074
3162 21682 1504 2761 12898 642 2525 18529 8332 1962 17587 722 17740 8544 33970 4210 718 37722 12198
3163 574 609 2276 25374 13217 1029
3164 9630 4610 2315 15900 31669 2321 27817 4519 18409 1321 7374 11704 40060 28078 10259 450 3228 2153 8794 4841 2242
3165 6927 7398 1437 12318 7350 2325 11384 2342 3101 4519 2473 15384 5426 3079
3166 28832 37518 35340 17406 28883 23697 29017 23932 37471 23341 30173 28764 9593 28685 22833 40771 35582 26446 27655
3167 1997 33915 32630 8969 33927 2026 9228
3168 18998 20677 25872 16734 25869
3169 37592 12340 21174 21580 22217 38566 17808 27106
3170 15137 29107 25287 25695 22578 25105 10881 22549 26359 22624 29341 27744 32785 24054 29202 22519 30314 22603 24186 26093 29725 26094 25690 23540 27090 24587 24964 27197 24209 22491 10883 34194 22376 24991 30582 22404 25081 25700 32100 24197 24198 24527 26719 23896 38583 22389 22528 23513 31083 12188 22371 1509 5375 1508 3802 17126 17391 13496 38585 22905 24721 27899 38692 22618 38333 35824 28246 25737 23517 34541 33000 25012 21536 22459 40776 23010 22667 23009 34706 26635 21924 21921 37550
3171 15843 16684 28661
3172 24698 24746
3173 10653 15351 25618 21483 4685 26323 13859 13045
3174 31348 38079 21590 24180 25116 23717 8846 21536 31729 25436
3175 12994 12993 13026 32108
3176 11427 10945 11238
3177 10575 23450 1807 5478 20401 21208 10844 17409
3178 16989 15611 3831
3179 26636 34712 26651 34107 36754 22438
3180 2027 2002 25534 23998 21963 23325 2337 13472 1538
3181 29412 18430 3288
3182 1537 8449 1684 37502
3183 1537 4434 30793
3184 27838 23608 30207
3185 16152 16141 17403 34762 16140
3186 14548 14564 14572 14577
3187 978 7666 31864 19681 23324
3188 8847 34547 19109 34544 33822
3189 5685 18445 1502
3190 21172 37239 24712 16215 28292
3191 14476 628
3192 14573 28480 14546 14554
3193 7846 980 978
3194 2421 6160 1639 8095
3195 13169 6674 17423 642 15681 16626 34244 957 1082 15120 28634 33530 559 1811 20130 1096 2635 722 19360
3196 141 12462 2533 28457 16319 21727 19091
3197 1417 356 352
3198 1709 13501 8323 13166 1760 6738 1829 991 3899 1870 1771 944 2959 2525
3199 17918 1811 40260
3200 40581 11584 40114 29659 33641 29658 21811 11598 37732 11583 21831 21461 33636 11579 21800 23556 28346 3343 37292 1650 16108 32849 11585 11573 36261 30810 26542 26543
3201 666 14769 677 1821
3202 4202 36831 20814 17430 12340 22318 9914 7550 718 3261
3203 29935 30524
3204 7897 693 571 35460 15247 2370 3934 39105 12985 1894 13436 18697 13388 2637 15370 13389 468 461 711 19135 15666 15106 18293 1734 13433 2525 36000 744 472 870 3901 6750 4111 6751 4003 5663 15646 561 3860
3205 21113 561
3206 722 36564 34627 34615 2649 1537 7777 2525
3207 39292 1811 6038 2662 953 20840
3208 5565 5566 23590 8573 12131 10334
3209 27122 17256 4659
3210 141 978 29217
3211 529 17017 15432 10388 28853 34995 20249 34051 3133 9639 8739 3765 15994 5418 6589 309 35006 35001 35000 35004 34998 35002 8586 35008 38562 558 3420 783 33352 8799 4629 4657 6824 39613 559 12381 14312 37435 33364 30990 1021 23420 32449 2650 2651 2652 1015 11720 2654 11721 2655 16046 2653 16045 5287 15144 14436 1023 1010 5172 283 33962 3421 6593 203 9626 5403 1473 10261
3212 13041 18716 7332
3213 6922 13849 37227
3214 35840 16055 38320 31736 32273 31588 9315 942 20509 29908 27639 2993 15255 3385 1075 9333 1050 17524
3215 3064 32370 6077 31594 32375
3216 10969 10991 25985 7596 118 106 108 33039 5972 1458 7602 7521 11024 563 8105 8079 8077 6021 81 10987 7514 7502 8357 11352 8361 33023 8196 28306 75 8380 70
3217 1225 4469 5698 2488 8167 11121
3218 16410 3357 4231 560 13917 21302 18785
3219 37729 3190 3189 15620
3220 31670 19348 3046 1593
3221 3617 4890 9216 7209 35737 19645 4829 4793 7642 3607 34892 40965
3222 15044 18524 17493
3223 8322 9273 7940 7635 821
3224 593 591 1735 4777 4778 4779 4539 829 827 5512 26019 35995 2014 36217 7209 9213 8962 8366 19791 18333 837 36014 4775 2394 4811 2525 38570 13441 16237
3225 16920 24026 12824 5507 9212 18289 1355 8366 29415 39860
3226 27500 30556
3227 24569 27564 39751 28715 26325 25263 31090 9914 17406 38794 34872
3228 11337 5769 14152 10378 8689 15508 2510 7383
3229 37187 26074 33220 26842 24317 33599
3230 30728 17498 16145 30479
3231 21520 24493 34201 29055 38776 23112 28052 23030 26392 25738 23697 17808 24904 23224 22428 23234 40321 26691 17406
3232 22323 3412 22623 24032 17406
3233 16145 19109 19127
3234 34209 10650 10649 718 2673 5435
3235 8851 21159 37183 29762 20680
3236 29726 21912 21536 23348 23297 22882
3237 24653 25289 21922 27136 21695 22723 31284
3238 10877 12186 22380
3239 8861 9914 14529
3240 11814 2203 8266
3241 27076 25277 23297 29139 22875 28750 23885 23502 35716 38045 30184 40535 31324 21950 10879 27168 37762 27167 40962 21536 37882
3242 29595 25824 16135 34588
3243 1236 10689 22087 36676 32935
3244 1105 4430 4406 7706 679 2056 6539
3245 2324 198 8884
3246 28732 16089 28887 29087 13599 1537 5172 24326 24328 30410 32933 29212 10689
3247 4994 5168 13047
3248 23349 23924 25025
3249 25193 28512 21352 30562
3250 35387 24701 25310 24643
3251 35695 22031 28730
3252 2635 1165 17332 39095 2337 3154
3253 15459 699 10607 4111 3239 4025 3988 6751 9320 3998 3997 4000 22676 16661 2384 4339 39551
3254 5136 602 2398 4027 2396 3945
3255 19035 30971 8095 21650
3256 21661 5667 21658
3257 9920 17573 17498 31077
3258 26204 2434 2432 3221 34820 30087 32323 32808 141 3294 3295 4914 837
3259 937 1986 6499 33075 14582 35130 14587 25767
3260 22139 35180 21182 25080 27213 27653 23234 28065 28030 25106 26713 40960 22473 24575 21909 23231 22392
3261 8896 34938 13907 8897 11702 558 2318 14244 1441
3262 2931 2649 4545
3263 21451 21827 3344 21074 11579 30807 22847 11600 27772 30806 21467 5727 5728 21091 21095 11595 40581 21459 30810 37233 35764
3264 21126 22463 22623
3265 25968 40260 2859 911
3266 23248 3192
3267 7477 3140 24015
3268 20108 14043 4220 40022
3269 15076 1726 20221 3250
3270 32231 10607 3850
3271 642 160 7241 17773 2713
3272 25099 40108 30631 31712 28067 36954 22406 17405 22990 29774 22634
3273 14899 35143 5878 14888 22853 1537 17740 23796 15564 1609 978 5922 5856 4529 20548 10046
3274 5987 5973 5983 18629
3275 40082 22816 20174 35223 6704 13662 15902 20520 4427 20176
3276 2525 1811 1062
3277 31998 34435 29955 29982 30161 33206 30012 29957 29958 33303 30038
3278 12498 3414
3279 18034 16884 1995 2525
3280 22326 23835 28596 1685 17735 8471
3281 4859 28636 8523 13116 12199 21402 28990
3282 24928 18580 1204 6425 9082 211 2574
3283 12711 1077 2397 12705 1750 9299 1930 11141
3284 876 594 4179 21840 21434 4900 4893 4898 4892 14996 4891 15929 14997 12114 3152 7471 2525 838 32021 9299 1937 8336 1817 3922 1855 3363 9328 894 35507 3250 11789 17880 10058
3285 23123 1025 4289 32178
3286 3850 12713 463
3287 2525 1811 3163 36245 7734 9810 13356 7788 3157 26733 14393 3160 3162 7720 3183 3178 3169 38049 7723 7653
3288 10164 20778 10121 10159 11237 10153 5462
3289 3701 27177 11128 38757 15388 3688 39934 8163 3668 2624 31264 20835 35231 3699 6212 40312 2463 2589 37970 6098 8283
3290 25459 18250 2808 30355 2824 2337
3291 2923 1065 4091 2525 10955 2330 15360
3292 20129 16028 1933 2370 1824 11099 16349 1538 2525 16043 4013 4349 4015 8124 2398 953 3918 627 15515 571
3293 35375 305 3736 198 1619
3294 2638 25410 2032
3295 11464 19439 1982 571 2405 627 30496 628
3296 36552 167 23368
3297 29662 8337 876 35592 6751 4003 18690
3298 2388 1818 2371 892 2367 679 9286 18487
3299 728 6734 35748 22541 11083 17325
3300 805 2526 3039 30788 3052 2263 38562 35008 35006 34998 33516 3074 6610 5617 3031 35605 4622 4571 13339 23740 559 1811
3301 30670 27669
3302 40717 40937 35687 36957 27655 23697 21181 12186 25738
3303 26441 37274 23715 26372 26060 40596 24993 24427 30444 36595 22378 22538 28716 23197 28248 40571
3304 15575 15008
3305 8913 32118 17646 11671
3306 31529 23415 22766 8861
3307 15445 10666 33749 23238
3308 29767 36894 25908 31329
3309 21948 38382 31946 24136 30686 22501 22623 38841 8537 12340 22831 27929 27996 34076 22409 21154 36002
3310 23663 21536 35852 28067 23341 23916 28746 31792
3311 26130 35342 30268 33259 31402 30249 38532 24981 32492 31399
3312 24629 31159 29304
3313 8554 1165 34962 964 3204 15216 2923 30437 30155 16440 40091 16421 8239 3202 9724 14453 467 2525 722 1537 3065 7322 4258 4294 39024 11049 718 1538 2941
3314 29305 29304 29769 31321 35482
3315 28669 28664 28665 10877 21933 31700 26386 36765 34875
3316 11674 3604 8929 20951
3317 27390 12292 7139 12895 37699 1567 13326 553
3318 7334 7332 30918 29384 16899 7923 16898 13044 7333 7924 18323 11848 13589 22237 13549 13548 35119
3319 17994 6866 12712 3192 476 25362 32445 15171
3320 14384 33877 30683 7125 2525 15734 3846 5110 642 2800 9903 7910 2337 2825 20189 11842
3321 10649 15848 31991 16019 37988 14529 13021 3419 4680
3322 20579 29217 17798 20574
3323 39993 36835 18644 20011
3324 2220 275 11622 15167 13292
3325 160 10689 28912 6406 39123 36676 38016 31810 8398 1509 20814 13021
3326 1682 35650 3326 3817
3327 38646 28535 8263 15110 17424 8955
3328 23902 23897 22839 25080 22601 35824 39751 40568 38089 23296 32755 22405 17405 40835 21535 26623 29330 24968
3329 7330 7331 32555 4319
3330 29886 29885 30333 23869 22150 27271 21937 33575 26325 25906 24623 22445 25336 26443 10877 30363 26386 26400 27556 34875 23229 24606 21536
3331 14626 14630 36168 37704
3332 11563 26903 15532
3333 30864 2365 837 2363
3334 27732 27731 5117 17451 7287 7225 14347 5119 19846 4341 5121 5124 17935 17817 20636 18583 18254 31491 17452 7268 18252 19560 7186 18431 2731 32037
3335 877 3981 722 13491 2649
3336 24970 30312 23233 26860
3337 5094 3607 2662
3338 33982 7874 7875 17663 7641 17662 35083 33073 7646 15124 14390 15125 7648 10457 20146 25614 20145 6752 34507 14965 20110 20913 19830 18250 19433 33282 34913 18257 13222 7798 7821 8540 8537 2337 8304 7722 6769 5017 16862 8420 4826 6757 12109 15335 12123 4764 3616 37090 32677 3419 7269 12895 7190 18258 642 23581 13796
3339 21548 28054 21177 21590 25639 30189 36393 36600 38375 17406
3340 26308 30474 29785 31128
3341 14688 22729 20799
3342 30481 1165 978 2662
3343 19653 36374 22800
3344 34015 22474 22961 21913 22990
3345 1169 30491 23811
3346 21695 25056 22651 24124 25679 33852 31059 25080 33309 34419 23397 34420 17406
3347 2337 699 9926 4111 2525 838 19486 10041 4077 3878 27801 473 15029 3309 1971 20218 20214 12007 1758 20220 3880
3348 11159 38101 37952 2512 2291 4658 4843 309 12306 18402 1436 781
3349 27701 35158 27716 25149 25097 27470
3350 2067 1336 15543 8297 8611 19798 18746 8616 13314 16102 13605 2097 13334 8802 23482 1469 13128 2190 370 1611 35907 3134 14175 4610 5015 13312 8587
3351 33375 12518 19304
3352 3469 31993 32682 16085 7940 2373
3353 12227 1811 17967 3946
3354 13277 32901 32902
3355 9261 2956 18898
3356 4661 4660 32698 11158 35675 29419 9409 23768 4669 16003 3281 3260 9408
3357 19324 15376 26728 5660 1337
3358 29062 21590 31051 21695 23155 30222 37906 38272 30219 30218 36801 22656 26721 22376 24663 22929 29551
3359 34590 39763 22918 22435 26954 23000 22968 25108 23194 26352 22553
3360 5593 34919 4434 22757 35856
3361 600 3251 878 728 6676 17479 31966 14793 9724 14448 18479 3140
3362 12318 8685 5414 24776 3040 437 11166
3363 9753 9795 12253 7720 3261
3364 8849 30932 30922 24505 23297 40098 36073 24921 39092 26124 29104
3365 33547 4732 4820
3366 34598 17102 1685 21242 32643 37590
3367 4859 12468 4863 4906 19646 5607 19634 5128 5595
3368 7156 642 5948
3369 2372 3218 30082 2365 2368 17599 2357 24334
3370 13932 2314 10826
3371 34089 7183 638 23581
3372 28943 12937 1821
3373 658 994 659 660 661 16602 8314 16620 821 2525 14474 662 924 20228 22859 15656 591 1038 1066
3374 14588 30323 30324 37449
3375 10417 14476 11870
3376 17991 14773 18679 14472 973 2622 21040 21030 1179
3377 32430 2807 2748 32431 2749 30964 9187 20636 17441 5098 33745 19842 2689 2863 2830 2692 2690 2686 36018 2740 5104 5110 5740 32138 17848 2687 5747 19826 23546 26269 32293 2319 38880 9219 15534 36274 5520 36013 29404 36272 28456 5521 20158 29394 28454 36023 28398 40872 2014 29401 34104
3378 35192 978 17430 722 4320 4331 4294 28018 19076 36448 22867 20283 14506 569
3379 128 1191 2463 1112 30602 1258 1295 2177 36039 8163 15378 40085
3380 2263 9359 6029 10340 13324 8653 6625 11123 3105 16986 33342 9365 5423 8598 13915 12281 194
3381 2363 32202
3382 369 192 812 2249 14177 529 32202
3383 1186 1128 1127 6182 6184 6170 6173 6181
3384 4207 5856 980 24345 283 14109 5953 5960 34347 5929 978 39339 5941 14919 14892
3385 32197 31444 24382 24386 30488 23460 13352 16176 4238 23810 22102
3386 9571 11638 4319 13703 12432
3387 8618 14138 6976 37863 4571 8828 6204 28633 3046 13794 31924 13798 3784 8207 308 4570 34794 36460 478 296 2247 1421 13799 4622 11360 3472 176 208 2116 12310 1319 2146 8781 1623 2595 9497 3519 203 8592 330 3078 2323
3388 14077 2442 5926 1428 11709 1586 8593 559 21648 570 14062 27897 18367 978
3389 6248 1115 28441 15502 1135 1211 1305 8970 5692 6233 6247 1304 1160 2489 1128
3390 8095 2971 1537 5256
3391 4099 4059 2283 15221 1816 29277 51 628 28537 35266
3392 718 10689
3393 26909 7270 26911
3394 4616 1149 10328
3395 10498 26515 10502
3396 10046 9268 2985 1072 12568 2927
3397 5337 16314 16267 16328 26570 5107 1811
3398 16438 20360 14811 16433
3399 2985 4091 3332 12561 2984 1993 1072
3400 21410 14031 12904 40710 14037 21424 13468 7826 19728
3401 1204 1207 19628 4552 11002 1352 8996 17165 8997 34811 34804 3191 1182 1211
3402 35540 7270 39146
3403 9163 121 11329 8196 7526 8343 8092 3219 82 10957
3404 11801 10833 13058 21217 10140 22865 15197 10153 5531 11261 20769 11388 11649 22862
3405 16039 2525 7452 2810 34495 26909 19516 39146 3428 10606
3406 9328 598 2923
3407 4737 5043 6770 4869 5055 32663 36744 21447 32089 17402 3607 3616
3408 12948 28551
3409 21983 28343 7209
3410 8444 8027 5687 1683 1493 30619
3411 12342 155 2525 837 39325 14701 1084 1038 22022 18414 982 1027 9720 3140 3294
3412 18490 5113 9678 19317 5117 34669 12185 11709 12159 12182 4519 3794 20105 3082 2295 4841 557 16986 2305 33527 3088 3074 780 14235 2327 296 6589 39141 8684 14215 6127 6558 9907 3562 15555 23734 3040 35008 309 7556 3099
3413 29774 21913 22589 28204 24088 24049 26951 35318 23699 12186 35178 37247 27941 38297 36763
3414 19652 8847 25833
3415 36377 38347 6044 837 824 26920
3416 22592 22503 22438 24081 23234 24555 21573
3417 22438 26407
3418 21536 21948 37608 36063 27276 22737 27852 27053 32860 36353 20727 21324 29293 23359
3419 11543 38734 10427
3420 37008 39857 35816
3421 822 1933 12080 821 13272 39706
3422 22634 17406 40571
3423 13746 8919 16705
3424 25021 27302 23884 29026 23297 27260 39718 23348 33682
3425 3616 4798 32048 20617
3426 24963 23233 21858
3427 28660 8906 33665 4700 29515 4695
3428 36761 17484 25253 31953 17406 28159
3429 37364 24306 25902 39586 33336 25680 22522 40922
3430 22413 22874 22572 26492
3431 12947 2337 1504
3432 4646 8027
3433 9656 7779 27780 2053 27557 34878 21873 22745 21876
3434 33746 2765 19842 2692 2830
3435 21577 8849
3436 27706 36769 23219 24508
3437 15270 13310 991
3438 2408 14614 628 12560 12589 2525 51 12438 39069
3439 3779 17745 35279 1236 13751
3440 4039 6675 12700 917 22252 628 1730 1977 3822 1905 14477 15080 12200 679 4029 3185 605 18781 2525 2493 3154 37090 838 14476 13446 14607 1042 1910 12707
3441 23602 14399 10694 2337 21448 5020 16971 7859
3442 369 3266 187 559 1811 8262
3443 35134 10694
3444 594 5917 34775 658 16352 9989 1851 1066
3445 10407 20839 8622 1613 34362 35375 3051 15473 11692 2466 38054 3031 765 2323 2266 2510 2299 309 2310 8295 621 5773 478 1566 1565 12165 1617 3030 1563 6630 13673 9936 16498 9610 1564 3736 1569 397 3784 176 2220 2219 2214 11607 4626 7383
3446 3742 31878 3795 4571 35380 5194 37403 37402 14077 32508 978 40541 1242 8776 11339 8189 16491 5769 14143 11337 9941 14187 14184 20388 14199 1566 1565 6602 28901 35254 30938 643 160 34895 559 13325 17895 2473 2526 9293
3447 9830 3109 12325 6928 9356 21307 2538 17757 283 2359
3448 20491 20489 575
3449 23734 6630 13081
3450 31312 23542 22651 23012 26963 31059 27643 24079
3451 25369 11604 2280 560
3452 1616 12301 12306 7347 8646 6087 37794 28127 21069 1589 8189 22337 559
3453 21933 21536
3454 978 4530 26218 1023 17212
3455 14739 17949 13248 1811
3456 25239 25080 23355 37853 30560
3457 39273 23397 26150 29563 28539 23910
3458 3432 2489
3459 14644 7059 1821
3460 23715 27581 22623
3461 3814 8453 14829 13599 17203 17124 5691 12650
3462 33624 17022 14549
3463 8590 8890 2308
3464 30109 34510 18492
3465 7365 3469 4610
3466 35276 23754 17247 31677 17253 38093 32465 34983 17246 9408 3191 837 2525 2929 946 3896 609 4079
3467 12190 30441 24048 25582 17406
3468 1254 2554 36230 14173 6160
3469 27502 24690 35387 28065 24692
3470 22649 22644 23898 29035 26451 21536 36441
3471 19631 13253 14637
3472 20154 14744 8095 160
3473 11387 3689 180
3474 10034 1960 16561 10030 1875 3532 924 17266 17685 5604 37948 40290 3838 3316 681 682 14770 34355 26276 18352 33866 12566 34528 2525 893 11511 18697 12851 11504 34531 37431 11500
3475 35348 2337 2525 2978 680 3366 3315
3476 23567 19435 16040 40030
3477 5421 9621 6377 15473 35643 10350 6410 20109 13803 8165 33961 334 33534 9382 6414 23777 25212 4627
3478 2525 456 22279 22816 20069 31853
3479 20068 36061 34094 20521
3480 4299 4294 20992 13277 276 18323
3481 4996 8550 18468 1686 10809 17082 51 1014 8264 36101 1545
3482 4974 4977 40727 33362 33360 40583 32277 33361
3483 17028 6662 5196
3484 12812 1354 33887 6746 7835 7797 978
3485 2365 6038 20155 1811 8201
3486 25319 23225 23182 34250 34161 27935 30629 24141 23296 30185
3487 24398 993 4149 3898 2492
3488 12184 9355 8606
3489 29123 15579 10685
3490 9257 8278 5625 1646 3044 1553 3793 39657 1321 3539 1288 381 6172 39627 6171 4392 16806 309 5004 5578 1128 1127 6729 3658 40880 3647 6180 39636 39635
3491 36784 3195 35262 33063
3492 22722 21590 20712
3493 9519 36675
3494 283 9896 14680 24359 9859 39423 32023 13637 13618
3495 19527 1546 31277 29443 28931 17371
3496 34049 11353 6701
3497 19931 22105 22104 31227 26515
3498 2565 18264 15950 15441 23240 18218 8043 6901 30602
3499 3510 9067 40814 3525 1811 3501 37785 9028 3444 1417 1128
3500 6570 10366 529 39649
3501 36709 3064 15561 33537 31435 11639 32778 7439 37770 32779 6958
3502 16274 22756 16258 20229
3503 31721 4883 34786 3231 3612 2365 3195 32683 3196 3381 1735 3854 1989 15221 14861
3504 16381 18333 36058
3505 2773 5110 33935
3506 5017 4828 39834 6744 40920 5514 7209 822 1356 13301 30510 6748 2337 15126 3607 3617 12110 40965 4800 4738 4803
3507 329 9400 127 3776 12659 3501 9081 2633 4532 3515 9014 9098 6927 2310 832 828 7209 837 160 9020
3508 14017 15384
3509 4478 17992 877 14634 15007 22851 679 14715 14474 22781 12001 14472 2525 25506 1995 155 14741 16966 27463 31721 4883 17978 12053 31409 30849 39301 16086 12056 18291 12043 28475 12100 14739 6923
3510 8340 1082 32145 14719 4783 722 2525 7964 28974 20885 1717 16344 15643 12590 16549 473 2934 2944 881 11532 39756 1750 15274 882 16598 39910 16361 20294 590 628 1030 11757 11482 30899 671 1959 12705 4159 1930 11519 3250 650 35102 8253 19137 14761 30901 28147 30829 18694 2380 15311 3973
3511 2525 3261 980 3915 1264
3512 8906 8150 16421
3513 31513 822 17038 6746 5591 34264 17678 20231 2337 19443 7811 7812 35549 17702
3514 20352 20359 30156 30154 16438
3515 18061 8363 12449 23072 18058 25781
3516 3966 4242 18702
3517 23028 26707 26823 25001 24573 25319 21172
3518 29034 22662 31919 35152 22623 24100
3519 8906 9914
3520 21901 25116 21536 28670 37463 36760 39753
3521 31811 22504 27494 21920 25698 22671
3522 25116 25059 22585 28070
3523 16424 20343 16420 36070
3524 24040 23216 23671 21180 22571 22410 33581 8852 30686 21858 22404 37680 32889 25698 29523 26372 24644 27089 22455 26348 22666 25743 22626 22640 22387
3525 22436 23028 21536 21696 22437 23117 38210
3526 25708 24040 24264 29812 8846 22582 23512
3527 24442 26377 25572 34855 22824 22623 23154 24446 25577 26502 22669 25902 26441 22651 22521 24647 24679 29193 24977 34169 24445 23533 25563 25006 22673 17484 23658 40648 21909 17406 22719 27654 26651
3528 35613 21892 39761 39386 39842 31893
3529 11944 4202 17484
3530 26082 23532 25073 35892 37357 24669 48 24965
3531 21116 21703 8849 27855 20735 20683 21115 22132 38758 31169 31172 20725 39537 27852 27106 21123 39776 31731 21176 21174 25341 26136 28525 27853 21159 21178 20712 25639
3532 28371 37729 12635 13291 1500
3533 13921 17080 19289
3534 5802 32635 3432
3535 7081 18148 160 455 9139 9484 18150 229 3773 5148 2642 1631 8215 21044 433 8182 37972 8971 1135 13524 1665 5308 1338 19587 1299 2161 14838 415 5661 7445 376 337 6347 1400 21056 9099 9104 6291 35854
3536 24182 33423 21536 37362 26345 26468 25876 17406 23224 27654 18947 24240
3537 3151 15984 16262 12570 19163 17767 3158 29947 3173 7738
3538 9937 6595 2270 559 20075 765 400 372 3076 10684 206
3539 36445 3154 1538
3540 14015 16322 19094 4519 20386 34792 28338 32197 29574 29575 38858
3541 22361 36643 36734 22669 36900 24887
3542 22087 6291 37628
3543 6112 7464
3544 11782 9783 6029 3092 307 799 1023
3545 192 6833 3304
3546 2162 5357 2226
3547 15090 1758 5339
3548 35442 18904 38634 16395
3549 11863 33845 9571
3550 27240 19163
3551 2073 559 35227 2363 38644 17063 8728 30289 2460 8674 17007 6204 4570 3078 2067 8690 17772 4598 22337 2361 2176 1352
3552 6980 12381 15894 13831 6561 5776 559
3553 5070 14174 7556 4548 4387 1302 1253 1154 6275 5799 4371 26014 14155
3554 2702 9181 17858 28956 18431 34971 14366 7181
3555 22719 25051 29311
3556 37606 12767 19422
3557 2172 1417 3525 5705 37970 7121 3454 19567 18170 4432 3495 18194 3501
3558 24926 36119 28144
3559 14092 27373 27371 5916
3560 37843 15522 16493 15384 763 809 3036 14289 1441 8785 3078 3097 10384 11147 20530 2127 2136 22339 12540
3561 32914 4579 8632 12323 32219 10225 6626 7417 6951 9361 16982 18649 4650
3562 33248 33227 19957 32348 23455 19949
3563 4363 19624 7114 211 14949 5655 2574
3564 25942 28994 4223 18883 2220 559 3021 4570 3079 15460
3565 5339 12714 11775 7459 3915 2525 1428 559
3566 31554 29502
3567 7424 31557 2923 6486 12855 9338 37153 15679 1538 13843
3568 10879 34428 17406 34429 40667
3569 11592 26249 7749
3570 2525 3367 4229
3571 951 18773 17523 36717
3572 2273 461 1962
3573 36590 4490 165
3574 7331 18714 28363
3575 9035 20924 3458 9019 36094
3576 8690 14270 559 8328 15479 3615 4545 3610
3577 11394 10559 10566 11431
3578 28990 5587 4898 4994
3579 21805 17593 21461 1650
3580 2251 2263 194 2674 293 529 3097 7367 12150 3105
3581 593 2525 2337
3582 1172 4418 1165 978 4235 7572 13248 3192 1811 17767 18772 7664 11836 7667
3583 1306 7074 5532
3584 33769 27920 27933 32284 26606 31947 27583 39526 27595 38563 32560 27571 27156 36190 27160 22455 27898
3585 19917 13352 19906 26559 27984 15519 13346 14870 33234 24380 19879 33237 19912 26867 28003 24378 32791 28005 24377 32267 33236 19914 14866 13344 19893 23810 19959 19880 19954 22102 20898 26565 30492 19890 13664 725 8545 724 39128 12510 722 12731 1500 19916 4294 28018 36448 39342 12432 19076 20462 1537 30521 17335
3586 722 7458
3587 802 194 25844 8157 2061
3588 13087 2201 10701 13765
3589 17810 6047 14315 543
3590 21711 2478 9049 1805 2616 19332 1127 6111 8898
3591 1072 14450 959 1040 1031 10517 29907 9471 3142 19132 12771 13516
3592 23142 6483 17982 20234
3593 18517 9163 14349
3594 323 189 1582 529 12377 192 5886 8189 2306 307 4646 2417 369
3595 10802 6012 8266 141 23260 16265 16261 16296 26570 16264 4910 14791 17698 2940 13237 22870 28927 36106 13221 18704 17738 23259 23261
3596 3758 2474 3036 35644 5015 16497 3101 307 6023 15901
3597 2635 917 3195 2369 15070 1933 30867 6854 1847 14717 4051 11482 16670 594 11483 3903 3882 6850 12705 24364 11463 3963 3349 1959 9889 16357 20883 20051 31250 856 11767 1762 2278 6751 13433 4003 33350 1752 1988 4775
3598 18712 7435 20089 242 34231 7418
3599 4622 2466 2071
3600 27611 26983 29476 29477 27672 26974 40745 37993 27662 27008 29492 35774 29482
3601 1039 1745 983 10026 958
3602 32658 39069 35746
3603 13582 9163 32465 40830 32697 31808 35977 33258
3604 8681 6963 2301 3092
3605 32957 12917 1856 3192 4891 12531 17800 4888 1264
3606 3223 14477 1717 1037 14478
3607 1169 5098 26266 3125 7249 7131 2800 2883 7916 14889 19621 718 14366 19820 36748 32780 19846 25959 2689 2804 9185 19860 37850 2493 12581 2525 642 5104 26267 5110 13756 14663
3608 307 6448 1428 11136 187 15759 30350 628
3609 11249 13055 2363 10215 10547 10732 10791 5543 5553
3610 832 9308 16928 21381 827 12810 40946 5507 5506 2022 1998 36793 824 40566 34636 6744 37448 35382 20913
3611 8127 2397 7720 2383
3612 757 36049 2483 532 6647 3135 756 410
3613 6985 3565 1010
3614 10904 11247 21846 13942 7120 21563 39536 1272 24591 1537 978 13608 10583 21001 10950 10702 1128 6184
3615 12566 28458 30632 14006 33554 1875 38020 34635 38572 2773 7184 2659 4228 2746 19723 2783 7283 25462 9281 25468 5112 9674 13424 33873
3616 33992 26904 33496
3617 13109 13552 19607 15457 18018
3618 7359 39653 14236 39040 12325 13823 11153 549 36226 36227 14215 13788 1611 6375 8583 12131 7977 14684 14687 38955 28854 38893 36803 20260 802 38904 34668 330 14139 5015 37772 24928 39116 805 8157 3076 31890 3760 11172 11171 28947 8752 14177 19986 2526 18391 1619 3766 23773 39926 35921 35458 14283 7349 15250 1600 30768 23959 15923 447 9650 35008 34998 38562 189 3105 12538 3081 3094
3619 15125 18311 18476 17839 20191
3620 22499 40871 40739 31099
3621 10607 3846
3622 21139 21122 23391 38568 34198 21135
3623 26397 26403 33727 26401
3624 24302 21142 25323 24979 17405 35317 26963 34177 22585 24070 23397 26711 27220 25077 22406 23700 22989 29109 29178 31545 23293 22433 26621
3625 29737 19669 22686 21374
3626 28662 27882 19101 25867 19106 35499 28173 36602 35561 6983 39852 34774 39853 30464 37494 40080 19105 23659 19104 37093 25866 19655 8862 31208 23790 30458 32554 19119 23169 17498 30446 23178 19007
3627 7604 15182 20940
3628 20681 26098 28508 29148 24983
3629 29536 40619 38849 29102 22364 23225 25116 31963 22516 23019 30818 22411 12188 23025 22483 24032 23670
3630 35951 30306 22515 24177
3631 21145 3601 23504 37885 29813 34282
3632 23296 22830 22524 22874 17405 30313 25189 26493 22602 24070 24979 25705 22437 22953 27940 22482 22392 12188 27562
3633 4294 8939 5172 1538 12527
3634 22606 22659 38506 39807 24086 22501 23522 28058 23934 22513 29314 23154 28289 22422 23673 21856 25106 34072 39352 22918 40925 38932 24560
3635 22664 26631 25741
3636 25184 40560 22564
3637 33602 30184 26325 27737 27050 30183
3638 9051 9706 11228 10698 9700
3639 26475 23308 25722 22394 23154 28872 21948 24508 33833 28702 40295
3640 1492 1314 5131 12500 7335 17432
3641 33664 31998 31626 30043 30029 30017 30018 29971 30040 34727 30163 32835 30006 29954 30007
3642 13037 22578 23397 8028 14317 22791 22320 26371
3643 8906 13017 25172
3644 5624 6353 3621 1396 28485 3710 2615 2537
3645 621 194 3026 2566 19190
3646 25774 31099 27712 21536 30298
3647 27208 24274 29520 22905 22383
3648 33211 20045 3190 35884
3649 22642 21605 25162 22471 26378
3650 2466 8623 451 370 15919 26278 5386 10249 15441 24771 9781 12324 32219 5015 1602 36803 1128 6184 1127 1292
3651 2341 9890 12334 17740 4080
3652 30354 12184 546 3134 2299 28228 8828 4575 2263
3653 19944 17309 8428
3654 16997 19778 3736 19385 329 14256 11144 3068 8299
3655 28940 33880 37196
3656 21922 24565 29844 32706 21856
3657 4660 17254 17256 4665
3658 23286 1985 1881 3955 14465
3659 1500 5172 13482 3800 13363
3660 33432 34740 28240 21536 22278 24289
3661 19006 20812 29833
3662 22882 22387 21537 23397
3663 10968 16318 19081 16262
3664 18459 5343 15282
3665 33244 14392 33239 10519 24883 165 905 26187 17815 26185 13960 19918 10472
3666 1510 1502 30387
3667 35912 21006 1802 4759 1801
3668 331 14183 1209 2060 3739 2153 4602 19376 537 407 10353 3077 13915 619 35227 620 3041 5406 6824 8618 2067 12182 2417 6620 316 39355 36077 15230 13141 37973 32162 2146 1571 4579 1469 6204 300 187 4631 20324 9937 37978 16988 529 31363 13130 6826 16530 7209 40713 34363 6599
3669 14743 1352 642 2713 7130 2687 1239 2514
3670 980 36668 1537 2337 33789 17731 3409 8834
3671 16096 30985 23374 25770
3672 1744 571 18525 744 13469 15106 28650 35998 9430 29128 3216 1107 2283 8312
3673 14859 7262 16621 1077 19468 23284 7467 3615 3607
3674 18469 14801
3675 28912 31372 29076
3676 631 1962 16345 1933 3559 2415
3677 15303 15300 4544 17262 29114 13992 27687 4749 19630
3678 15561 27983 35881 36095 35696 37799 32642 13921 39373 15996 32774 34230 38782 32773 34064 2214
3679 9424 3430 3427
3680 6120 20452 19233 19187 19256 19180
3681 10684 4775 2525 4294 6671 13567 718 1165 978
3682 5397 194 176
3683 1973 20292 14699 8127 1946
3684 19881 27763 22268 24848
3685 12743 958 701 2396 714 953 20219 8128 1061 6520 3915 8139 8554 1509 2644 1277 7120 1515 1513 5198 5685 5131 13277 12329 722 837
3686 2272 378 39626
3687 18248 2774 19809 16775
3688 32137 26040 7160 18340 2683 17596
3689 2334 36365 20230 4764
3690 718 12730 3011 26530 17462
3691 35126 34528 16415 30109 36823 27430 30111 23382 3251 13422 15913 13432 3861 19135 3863 13433 34532 23832 34353 29718 16243 6464 6466 6465 6463 6461 6462 6467 6468 6460 20272 36747 28921 3195 3196 23337 4111 3970 6841 3966 12971 17995 3967 704 2393 18938 15640 2412 2413 3856 33617 16447 12866 18052
3692 529 30745 15307 32227 1271
3693 6122 10079 6117 19263 19246 19229 11039 11925 25782 23042 4972 4973 5237 5030 12448 5344 5439 7427 37306 4253 3062 33970
3694 39136 25668 25595 23706 25321 23727 34111 25577 39695 25604 25605 25606 34108 5076
3695 3862 13388 3861 19135 27638 13434 13432 39105 3863 3994 1707 3988 4775 23381 4160 916 10049 8112 28837 20673 1938 13310 25760 16025 3198 466 23382 35474 1067 917 1930 4003 2637 6751 4410 1746 11536 4111 1933 14025 744
3696 16717 22772 40736 31529
3697 2525 38610 32294 20429 3121 18035
3698 22807 7546 20540 21377 20532 34380
3699 22562 22431 27997 37548 27621 22919 25772 21536 21856 40027 25582 40654 38510
3700 19382 22744 30230 28237
3701 24653 24535 21536 22725 23902 24965
3702 30461 19107 16736 19112 26285 8847 30473 30475 28162
3703 22194 27856 24473 27161
3704 31960 38068 37246 27655 9591 27242 28742 21589 22669 24500 22410 26646 27898 25116 36758 27084 26446 31317 40619 31064 31067 25902 22278 22277 23310 38588 21536 36388 22527 21859 22446 17406 23697 27531 31349 21181
3705 160 5760 26154 5799 128 1362 5797
3706 15879 5947 12654 17103
3707 9619 330 293 11383
3708 27887 34396 34394 31049 16738 25857 40753 6982 19007 21371 31072 21287 20820 34395 32703 18998
3709 25319 21934 40635 21173 27621 25324
3710 16141 35307 29596 33459 32846 26652 25824 29607 31501 16145
3711 29533 21909 17405 22901 40500 24735 24079 21154 22413 22983 24573 24671 39394 36066
3712 8922 8921 15795 8913
3713 27812 27806 31003 9849 14688 33817
3714 8574 6707 32680
3715 36852 1493 6839
3716 9033 3498 35862 3502 128
3717 5550 34062 34063 34503
3718 8133 7997 16692 15819
3719 31946 26592 23037
3720 30323 14535 14586 14532 14531
3721 17069 18123 27696 35297 23419 9436
3722 3759 26216 27609 32550
3723 27518 31823 23885 21536 28195 26646 24611 27079
3724 722 1493 1502
3725 8039 19323 1307 15941 1183
3726 28497 11667 33434 16688 9 4700 10663 11 27889 11672
3727 3077 1610 16389 1469 4519 5300 197 3052 5379 40950 14516 4623 33516
3728 10066 24360
3729 28338 19681 20758 35516
3730 3810 14322 40264 8836 17391 13487
3731 26207 21089 8366 9213 9216 1998 7907 20479
3732 34889 3607 10954 21449 4796 4851 4774 35432 5028 10871
3733 822 8369 2019 20644 33019
3734 7527 9556 1217
3735 13869 39146 13867 29935
3736 19674 18069 15592
3737 6542 2540 6324 4425 4485 128 18198 1292 1128 4462
3738 685 1843 687 688 1902
3739 1061 2992 12355 956 955 951 1076 10614 9989 565 1933 32123 28531 18419 6495 9337 662 661 660 659 9269 1056 9315 947 1100 1027 1073 6486 19866 31245 9296 13411 11604 21301
3740 2660 2673 5582 2337
3741 27170 30534 28857 14177 18842 3648 3664 6701 8020 19622
3742 23038 22433 24175
3743 15149 7120 17098
3744 13715 563 118 8378 7596 5969 8073 34944 7502 25986 79 5985 7528 11081 7537 11327 8091 105
3745 10807 1264 1811 2525 2018 1357 837 2365
3746 14372 4430 3191
3747 6834 19720 7430 246 267 269 11011 268 7321 262 243 4272 5340 35876 4328 4327 4994 17304 27185 8515 5430 1546 5175 17139 3800 252 17360 13386 18767 38277 7605 1493 5174 1502 13505 1508 1509 1492 978 17167 12256 2337 722 26275 19942 2525
3748 784 205 189 1794 4657 373 19357
3749 6588 792 303 3096 4610 192 27560 559 28698
3750 7754 22847 31661 1650 2337
3751 1628 33911 33910 3606 18557 19743 9972 2014 36133
3752 2289 194 6593 532 11703 4519 3787 12514 3091 3737 1795 11709
3753 24639 22918 23902 40428 26435 24623 22574 27489 22413 23225 40834
3754 31463 39578 24751 3755
3755 4430 13785 7056 13780 5115
3756 10349 5885 1576 8289 4522 766 2255 5882 6949 3300 5007 2144 198 530 15023 8798 31025 6969 10671 32904 13333 10304 8799 769 2511 765 8685 27821 10375 2322 15990 5410 478 2466 308 5382 6931 3040 2310 31028 27344 2464 2257 3069 4498 311 2263 2319 189 192 369 1795 316 319 318 314 315 176 290 187 277 205 371 298 6029 1577 324 306 805 2190 29234 2252 6968 12149 36711 32278 524 3031 767 13803 1578 208 31760 10302 31880 3044 24952 2327 334 8612 2299 6641 5000 3078 8790 37843 28347 8785 36984 3780 35527 234 35359 35360 10384 536 9380 33964 404 2247 9829 8658 9398 2345 30101 5378 447 14195 14244 18163 10471 2526 331 9938 14215 1611 7363 18156 2474 8699 13883 10340 401 3794 2315 30549 1437 1436 3105 6605 299 4629 774 33966 13161 16520 8794 1591 6372 14151 1571 1790 1569 18398 19404 10369 10337 10367
3757 26213 2363 14690 160 2179 20834 7122 1149 1246 2573 7209
3758 9554 8266 978 11943
3759 11695 2525 2825 7157 7280 7169 7177 2821 2883 26794 17812 10460 12226 7703 9754 16072 30832 1811 642 2835 7165 7299 7179 2736 17820 7167 4341 19293 30961 2764 19499
3760 27424 1513 9957 12290 18340
3761 19544 19035 30971 8718 25406 8095 19532 11854 10694 20925 20953
3762 8522 30141 7812
3763 36117 16143 33457 35486 16141 29595
3764 29035 31541 22646 29499 24975 24049 24447 24296 31703
3765 26618 23396 22373 23216 22585 23709 21905
3766 10075 19252 20426 5079 20137 19232
3767 23123 18702 18949 19380
3768 32387 13034 3552
3769 21573 21536 23710 21172 29499 25074 22441 23523 22450 24070 22921 32754 32283 22667 22473 23721 22387 22878 25690 8013 24965 22383 24979
3770 26503 28030 25682 23203 26959 30313 21909 23896 21536 27562 22392 24685 21923
3771 22524 23225 28025 32709 25001 38696 40595 22432
3772 32843 16141 9918
3773 20727 30686 25572 39651 20744
3774 19669 21377 27887 19007 35602
3775 22852 13028 18960 29643 26112 21475
3776 30590 9920 34863
3777 22513 23712 22644 24572
3778 9888 9614 36557
3779 23001 24427 34284
3780 29966 29989 33664 30005 30040 29988 30759 29973 30025 30024 30165 33206 32835 30166 30004 30039 37080
3781 775 3305 2525
3782 4434 13177 40311 20564 7207 20644 1628 16106 16916 5515 9197 13172 302 1571 2299 3092 619 2467 2324 1582 189 4519 39936 559 141 2337 837
3783 25287 22595 27209 34184 32857 26375 23301 26855 26627 29534 23902 22959 28065 22652 24507 34175 39953 32709 25877 39986 25251
3784 620 478 6609 16545 15900 20109 3047 11167 1796 2310 305
3785 4425 13592 5680
3786 24410 37853 38817 26398 31176 27941 21948 39712 24400
3787 16558 1816 628 9720 15643
3788 8359 34944 16816 38642 13718 7527 7521 11054
3789 17732 632 15909 9667
3790 4009 842 19665
3791 3367 3368 1053 1072 32123 12593
3792 3088 17999 17057 3025 4519 40980 5695
3793 24031 21138 21149 38420 29740 20727 30247 36484 23697
3794 28362 15184 8097 8098 15188
3795 33382 23932 9597
3796 34691 16141 34686 37173
3797 23590 403 8893 8573 6712 2510 1608 14255 442 13903 13888 5421 2242
3798 2971 5250 3424 14729
3799 14587 3820
3800 26656 34688 33456
3801 37934 35399 37445 23669 32473 26325 25774 27168 22438 24264 24739 39418 21948 38088 29810 23674 35317
3802 9914 23815 19654 31069
3803 1972 874 13871 2525 868
3804 12861 12750 12863
3805 3198 12983 882 2935 1842 9715 653 32654 13403 13417
3806 283 2676 1933
3807 18880 27192 32772
3808 642 14445 4740 21408
3809 29069 36241 9662 9283 7038 9673 17526 7011 16282
3810 2558 2565 3483 32177 160 1242
3811 20825 19652 23401 19003
3812 16734 16723 9918 40885 16019 9920 32580
3813 29202 37817 35210 21693 40848
3814 14041 12948 1536 722 8543 15235 7873 2337 978 981
3815 17401 30856 17869 15307 16858 17264 37943
3816 15099 1925 4711
3817 34098 29976 30759
3818 11455 10823
3819 4440 7064
3820 21080 2337 20164 1609 24065 23360 37104 23402 9 21235 8429 6070
3821 14863 3951 16649 561 37065 23414 4171 24945 32649
3822 23505 22879 22966 22831
3823 1841 35220 3911
3824 296 3737 1441 6022 1436 1437 8884 19572
3825 7179 2855 2809 16771 7131 7177 7267 30635
3826 28115 20758 25955
3827 6013 2 31617 1215 8365 8072
3828 29710 17284 821
3829 2014 1357 2015 1355 837
3830 11719 12497 6985 23419
3831 9558 29952 10995 13714 28307 5985
3832 24390 26164 26168 1169 18020 1538 23635 7315 23627 18766 29665 7930 39368
3833 13095 40389 5859
3834 1699 6917 14161 15946
3835 850 8522 559 20104 1577 620 2319 13091 2337 3615 7473 26005 29688
3836 9006 11332 9004 15287 4637 8995 11000 37956 7125 17830 2771 40016 19824 5104 33374 2744 2843 2813 23574 17846 12083 14353 2740 7252 34776 38017 7156 16589 17451 36906 2717 34961 7228 16770 7290 2721 2872 29428 2743 33802 2815 2844 33803 2802 40431 9184 35844 16759 2727 7278 4228 16254 2821
3837 28426 5917 14732 3871 3884 14465 28425 16339 10025 13204 1066 7490
3838 18384 5859 5928
3839 35173 9914 20814
3840 7182 7183 17451 2693
3841 27134 28391 12144 187 34593 14692 4623 5211 36589 5443 9846 23439 34256 23447 36588 11654 14592 27152 35967 27153
3842 2525 11777 566 22750 1893 680
3843 21954 22001 22002 38455 12958 22003 21836 36653
3844 11347 837 2337 19630 13190 13221 7525 123 159 6523 1855 15090 4232 2365 3191 18490 13782 7031 35309
3845 1362 4497 18891
3846 5147 32638 14681 11186 29256 29257 30952 17196 5287
3847 8429 26531 17305
3848 19517 30522 29935
3849 838 8142 11141 2052 4409 21445
3850 11470 11091 600 32459 4053 4097 1708 1709 4173 4150 4174 16042 4016 4013 872 4139 580 13448 15732 28424 1895 571 2924 1078 2925 1977 4777 2413 1735 1973 15105 1829 1762 9331 2396 669 587 3128 1869 14800 2934 3941 16584 11771 4079
3851 5490 35071 30613 20863 11850 29409 30644 14755 25481
3852 25858 14963 17685
3853 3986 3018
3854 677 1959 12588 11481
3855 18008 8138 18010 877 10412 1107 21978 722 34827 4479 2355 2404 4128 1893 2525 3243 3359 6519 15269
3856 7550 3419 37604 16201 27461 4906 7871 7266 642 4131 8906 2525
3857 3614 23282 23283 33065 7467 32906 14860
3858 9086 9033 3444
3859 19560 17821 7249 12763 4164
3860 628 10052 16608 2967 7745 1032 1708
3861 4202 16122 20395 31342
3862 25772 29833 28269 22530 23021 22572 27401 22366 22597 29558 31940 10878 28070 23680 24550 22966 23715 21930 28186 22468 17406
3863 25240 25723 23038 22522 23397
3864 3469 559 2373 2525 2388 703 3920 20056 2937 16608 15740 14603 40363 856 1869 5318
3865 21704 22194 21342 20728 21122 20744 34718 27863 22726 37018 28048 36205 21178 27849 21551 29759 25148 35157 40037 22727 26842 29065 27072 40544 17484 23407 31214 24505 21590 29064 35155 23683 22732 8849 31441 21703
3866 32608 40730 30885
3867 21129 40554 22397 24965 24511 34250 26673 30581 24035 34177
3868 22775 30887 32579 20678 16723 34534 35166 9918 9919
3869 8727 8772 1437 10309 1236 718 3078 33342 4582 12179 523 26022 6970 36081 559
3870 18381 5950 18806 27364 5960 13095 14106 18368 40472 9416 30976 18363 20548 5928
3871 30574 27364 5905
3872 37729 33017 11189 5211
3873 18957 35798 36930 36563 13262 36933 34702 40811 3591
3874 2263 3732 141 642 2731 31784 1636 33030 6347 39934 1128 2535
3875 23205 29547 29548 33586 32475 38740 33631 26854
3876 2492 980 978 12480 1537 461 3323 9458
3877 30789 8299 457 3092 11383 18391 2324 1551 6558 725 9528 8829 36792 5393 23323 25454 559 13339 39116 3199
3878 19383 36421 21877 4202
3879 40307 14622 12366
3880 20231 4796 9200 35208 37323 11793 19087 7859
3881 35885 34733
3882 31625 29992 30379
3883 23293 25431 26091 38404 22966 25751 21693 30582
3884 11672 8918 11
3885 9872 9871 2337 8537
3886 10694 9166 29213 14655
3887 17529 3261 10081 18180
3888 17234 17752 18425 32441 17233 16992 17236 18171 414 1307 17751 22354 17235 27773
3889 17406 21536 25074
3890 8847 7548 20825 25831 21327 22800 29785 30480 40187 23406 17581
3891 23297 24508 22918 25738 17405 23293 22921
3892 17829 17852 2806 2766 9461 15912 5747 16251 35111
3893 36450 35517 17506 5880 22100 15979 9260 2633 1674 31451
3894 5172 4210 3144 11065
3895 24927 24349 22698 27128 27134 3758 2365 11665
3896 6370 176 2359 557 15994 546 10406 3420 2117
3897 18184 20118 14975 7797 7828 33445 35089 35088 35087 32667 33447 37997 39241 33446 23817 32665 7820 7834 28318 15529 17699 16376 6779 6780 17723 6783 6781 26915 4740 37832 37937 38728 32389 8540 2337 4220 25807 12407 19359 21685 7876 7864 35083 14390 15125 7648 26868 13520 12818 2022 7203 15035 13918 15104 34635 17261 7814
3898 1029 870 1937 3867 18338 40810 3240 2355
3899 4395 15965 14820 1644 25227 6285 1408 1804 1693 1242 5609 5683 128
3900 25309 22478 23017 29528 38937 35947 23397 22602 24077 24529 24444 24276 23682 25331 34186 22412 12190
3901 197 5397 559 3096 2071 307 23734 20106 1207 23985 20029 2362 3035 3071 22675
3902 33862 26710 22320
3903 37574 1482 3800 7120
3904 14545 14573 25766 17020 32420 14551 14529 13373 8098
3905 458 6981 1620 32339 20559 39229 8605 14235 6023 20034 5775 21018 18391 3039 529 8828 2141 197 810 8581 31368 5191 3768 17062 32344 17047 9895 2155 7194 549 34998 35008 35001 35004 35002 38562 35006 35000 309 34658 20852 802 13312 13339 2903 40974
3906 15904 8637 8060 9860 23448 36589 14687 14592 205 8700 13314 22698 3758 3781 24354
3907 4776 594 33873
3908 10976 25984 8998 11329 21638 6019 16206 11962 11956
3909 16194 12233 3849 2525 9797 978 7733 3120 2962 1811 51
3910 13061 13148 35652 9986 6928 5552 11389 5532 10198 17755
3911 5935 5953 14057
3912 13592 3022 2265 9650 37231 17799 8423 3304 8797 8681 18550 37857 141 4545 30957 160 559
3913 24529 23904 25077 22278
3914 36665 36666 34821 38047 36667
3915 29917 3098 5004
3916 14862 15068 1089 9296 8235 4209 1053 1242 14306 35115 267 269 18878 4294 160 12736 11880 19010 28706 12369 32074 32866 33723 29208 13272 39707 12382 8906 8150 718 15598 11609 3322 37241 598 21995 1057 10014 983 33075 13198 12891 828 36009 20523 8366 837 2635
3917 22553 27530 25878
3918 17498 23788 19007 19669
3919 32533 2719 16256
3920 2169 422 2260 14488 23941 21304
3921 29689 17654 30553
3922 6875 1638 2193 1197 6906 2538 15674 35273 1302 2427 26758 9567
3923 6044 2525 3533 6053 6052 1041 4188 8128 19647 29147 34505
3924 1754 1753 13586
3925 9423 3419 25762 14529 30322
3926 14421 3121 35125 9455 12519 6984 12841
3927 8879 10361 176 3092 40049 8597 198
3928 4669 35069 9412 17256 29421 31675 7534 15038
3929 5607 40451 2373 2337 7859 6766 20150 16377 4891 11860 15307 36356 34618
3930 37780 9483 1212 31838 128 1195 39626 129
3931 6535 16111
3932 2493 2228 26752 16467
3933 19173 20454 6364 12014
3934 791 187 293 22337 20699
3935 17706 26866 22285 7404
3936 30710 12180 5635 27825 8729 6947 32222 40934 40725 31200 2302 17190 6612 38562 6613 1321 39129 9699 9494 39524
3937 5166 5939 26219
3938 20046 9811 27191 12992 15104 1744 13918 978 2220 38733 23549
3939 8890 2097 28080
3940 400 6595 1475 16485 1473 15522 1604 192 13902 8628 9381 2089 40109 19776 2417 20565 5637 8604 30787 2903 39329 1624 3054 31924 3105 1590 1470 39457 1209 22337 27813 4622
3941 25481 33450 33736 17944 17469 29409 3286 30612 17475 17454 30642 30643 34298 1236 16257 5094 160 33062 456 3261 3275 30613 29864 30653 3259 14755 17457
3942 30720 3419 32677 29935 34982 35765 33990 10604 38673 39271 35540
3943 19708 19229 9778 25891 4976
3944 18132 9541 30841 26562 29629 26558 11487 30487 4924 33230 19949
3945 18171 17236 30896 18467 5256 2201 10787 10575 5534 17232 34894
3946 176 4453 35366 34004 25977
3947 9509 1236 19551
3948 10866 28982 30375 26510 4407 2362 32223 7353 16169 14648 11993 9502 18820 16190 3746 5398 6370 18544 13323
3949 5879 5926 18384
3950 2525 8305 31586
3951 19785 9226 9228 33399
3952 24311 33595 27584 35335
3953 21235 33428 251 5174 36663 4994 3583 40737 32457 8511 40231 1493 3820 1496 3171 1500 5430 1495 17082 17102 250 8388 14437
3954 21278 27787 7889 27786 7625
3955 4113 1867 15663 15666 6674 6675 15265 2393 15652 1994 1236
3956 16739 9918 26302 23409 20893 8868 32890 28164 29785
3957 39938 23681 38287
3958 12985 37623 3380 2365 2386 14994
3959 40356 10882 38972 26063 25035 21924 23663 39453 21903 21856 22630
3960 21324 22115 21158 27527 28781 21169 21577 17406
3961 22242 22239 16 13039 3605 30299 29352 15836
3962 25667 26355 34541 24550
3963 38174 38794 16198 17406 25920 33600 10880
3964 15816 4694 13734
3965 23532 33410 27218
3966 16419 16429 34156
3967 35951 39712 24888 38917
3968 7435 29670 4319 18325 37306 11637 4307 23088 40256 4275 4337
3969 934 10417 687 10418 1870
3970 12190 22585 21934 24235 27487 37349 31928
3971 16120 16137 23691 34588
3972 24654 21918 26329 22419 29451 22835 22572 23509 21934 25543
3973 28904 20623 35695
3974 21536 22406 22400
3975 11931 19018 38328 11925
3976 5140 31897 8497 20378
3977 9531 18853 32050
3978 26303 23402 34572 20823
3979 17287 18674 1314
3980 5342 5343 4985 9555 33257
3981 3283 16003 11851
3982 1516 1513 8741 7388 6609 6809 8884 21186 3038 620 6824
3983 18560 10427 953 4030 36257 924 673
3984 22553 22421
3985 10897 17515 40731 10539 1806 10837 36613 34348
3986 2363 1169 8266 40806 2203 1306 40684
3987 21635 21613 30578 34874 22180 22196 23717 21605 38841 32506
3988 19109 19653 22687 31127 31802
3989 907 908 169 902 166 26172 6110 13807 1165 8266 31671 35610 34984 2518 978 4207 1169 37949
3990 4003 877 2637 7458 4111
3991 31295 27870 21122 25682 26712 22535 36280 28781 28686 23297 33077 38863
3992 5273 5277 5275 5274 5276 5278 2656 3569 3581 3572 280 5279 5280 12523 3577 35544 16835 26259 10005 23126 26425 15170 14825 16052 3571 9439 12471 12519 1023 14637 1017 37230 9964 28317 26913 34144 7476 7877
3993 2437 10812 23766
3994 20382 27130 3758 2222 7974
3995 9040 9249 17746 17752 30896 34897 17013 17747 13768
3996 369 812 559 7777 2051 19420 2525 7009 36746 29663 31855 1538
3997 27217 22912 21913 39814 23034 27940 26119 22919 25253 35389 22387 24590 27199 27198 17406 23097 25309 23225 33626 12190 25059 37546 36595
3998 832 19791 4402 3154 16847 33987 8537 19476 628
3999 17926 13434 2406 2283 2407 33502 18975 476 18696 3928 9833
4000 5134 11087 9421 18136
4001 13521 28558 40831 26005
4002 27726 9482 17178 39793 15938
4003 22675 31655 356 357 349 352 6703 13665 31999
4004 22941 28322 22634
4005 1053 18485 1051 946 4203
4006 2286 1552 22337 12178 4629 32381 28228
4007 20727 23030 25130 21122
4008 39549 12249
4009 9602 25427 24894 27278 27247
4010 29825 22719 18957
4011 33964 10302 20908 23736 8628 8795 7350 559 38002 12296 4571 20912 8792 10329 2067 8587 37844 12135 11694 3094 39832 34043
4012 35956 19933 28103
4013 10401 38054 6594 5377 10364 3026 9617 15880 296 5400 3092 330 13682 26156
4014 2697 34795
4015 13276 39292 31883 7335
4016 4139 28923 4173 13518 1937 3383
4017 30087 37086 7924 1538 9530 980 25955 1169
4018 27123 9551
4019 190 13337 32570 29574 23324 28120 10323 23489
4020 12450 12017 25784
4021 23327 1811 35901 837 2019
4022 18710 7312 18714 4332 13041
4023 10179 8211 160 2525 11141 10872 25734 744 11439 229 30063
4024 30919 4727 9216 835 7476
4025 206 4656 209 3227 297 1792 6948 3474 13563 800 192 369 16543 6832 559 8328 3304 2635 12762 9725 1064 9714 21302 10422 29429 15068
4026 11711 6379 1598 12540 6204 5423 11735 30745 477 16996 2291 9851 805 31924 20102
4027 33924 9233 6747
4028 4629 277 7347 15230 200 36081 2190 12276 13321 4565 13139 8828
4029 5112 2807 19029 15874
4030 25767 14556 32587
4031 39777 7129
4032 33327 3615 23948 23276
4033 34891 33808 17720
4034 3955 741 6478 12591
4035 17803 19789 15753
4036 4344 3322 11695 11141 13183 2525 16018 2825 7157 7177 2883 26794 10460 9754 16072 30832 1811 642 2835 4341 19293 2764
4037 19309 10868 7475 17684
4038 10326 8064 31448 3095 3025 5807 2361 39330 2364 1352 559 3035 1428 3469 2417 409
4039 6661 15186 28361
4040 15686 36096 3378 668 17927
4041 30985 35324 5077
4042 19159 16179
4043 5085 642 30869 26240 23136
4044 9268 1064 9289 13219
4045 4122 12460 821
4046 22028 30537 27897 30574 5928 35467 5850 28089 14091 5879
4047 22874 24506 27089 25181 24296 22562 35394 40509 23015 29508 34537 21154 26380 40032 28265 40622 23025 21858 27085 37547 22397 38932 34928
4048 8861 17498 29168 23267 34385
4049 22364 26441 21856 24116 23715
4050 14789 13225
4051 24428 21516 23721 22919 33418 23501 40037 8849 22726 37018 21551 22732
4052 29180 26947 33833
4053 27672 34312 37112 27613 27007 27678
4054 13017 27489 22719 33315
4055 17816 19921 34544
4056 16740 33699 16719 27225 31528 16725 16728 27227 33204 33203 16716 17571 12340 26887 36928 28601 26592 26886 38550 34702 36563 13722 35799 35802 35800 4200 23655 32388 21262 4198 4194 36004 26597 26598 35796 35795 4196 26594 25854 8858 34864 16717 40736 30573 8861 16724 29833 31527 35298 35875 16732 22772 9918 40730 22764 40886 9916 23415 22779 22765 16720 29832 16729 16727 9920
4057 21377 19006 20807 7546 20820 20539
4058 23297 9592 9593 25558 39014 27065 22589 27063 30315 22719
4059 7563 11066 11058 979 2220 4254
4060 27588 24062 22530 23234 23512 26486 26954 35064 26952
4061 24046 40217 29144 22949
4062 22651 22406 22432 25523 25324 24686 40903 32721 23869 26351 36779
4063 27534 23350 39171 23697
4064 7313 31434 28365 34097
4065 5406 20106 2247 7364 15415 4570 205 8890 3792 10337 204
4066 16716 16728 20679 16730 35171 17875 27227 31801
4067 718 39324 1072
4068 22547 24067 22839 21695 21912 22534 26632 28279 22397 23509 21914 26852 21536 22662 23309
4069 541 642 9187
4070 28186 27159 25548
4071 307 3157 7664 20140 14523 19168 28950 837
4072 33816 38386 19653
4073 26316 8305 2525
4074 12148 34301 30950 8192 17542
4075 12803 5519 16923 9306 37457 2004 832 822 1628
4076 15658 3235 15664 562
4077 1992 6868 3360
4078 5853 34946 19153
4079 28163 34544 26311 34545 8847 35612
4080 27878 20689 21575 21122 20735 21370
4081 21644 38737 23432
4082 24994 26635 21856 22401 22839
4083 13945 10551 21846
4084 4996 5947 4994
4085 10840 10850 9239 11818
4086 810 1553 7972
4087 30564 29183 35723 32741 26957 37203 39209 22640 28293 31813 27216 22585 29328 27998 28065 23714 38551 25072 25039 23234 24427 17406 30585 37926 23117 26377 40653 27490 12190 25116 29550
4088 10159 13077 18863
4089 25185 24429 22435 22549 23225
4090 643 4546 6163 7448 1200 2463 1699
4091 5198 39855 722 12260
4092 12890 12748 12747 12865 21112 10017 25810 12862 7111 18487
4093 31914 7859 4861
4094 13771 7001
4095 25116 23212 25931 22381 24649 29825 23501 24186 25608 40743 29164 36406 32093 37203 38388 25189 12193 23310 30930 25163 24104 23011 36031 28273 8846 22551 25039 22278
4096 6657 35673 29898
4097 3334 38901 7756 7455 20711 21428 16426
4098 27024 4160 16362 16244 2349 3957 26914 1762 16345 10049 18280 12709 14025 2287 12968 34530 1955 14726 16103 1957 3364 2397 20608 1953 12705 23143 11518 7954 8317 3935 11571 1931 1933 2410 12966 3897
4099 19579 19576 12131 34726 9888 9614 24344 7977
4100 11720 2654 16045 2655 16046 2653 11721 1023 8988 18878 5438 5439 9575 7305 266 267 269 247 1795 8773 765 2319 31368 2337 2923 7458 40140 1064 2792 2982 2525 160 3768 1538 559
4101 3211 1023 9793
4102 13800 2137
4103 1317 12678 21289
4104 3624 5669 19991 19328 12935 2522 2615 36517 8204 6354 6258 6428 6431 15383 28381 6199 28382 30069 9685 3541 19329 39097 1133 34235 3713 15388 37627 40826 36516 36520 33989 1644 5620 1231 37628 8283 11128 7656 1169 34296 5361 1168 160 36521 36519 40924 36518 6353 1127 6184 1128 34941 19992 28490 5705 3655 3711 40041 6170 6173 6174 6182 6175 6176 6172 6171 6180 32084
4105 26248 18336 29716 28921
4106 26296 24096 23404 7548 16711
4107 23087 4280 11454
4108 11468 6692 2491 11483 3352
4109 7337 37797 32448 3574
4110 3420 783 8156 20106 19386 20102 12265
4111 3598 15780 16709 36631 17628
4112 4646 1619 5378 8674 2294 1571 7394 1620 6935 1576 30883 23781 3767 28228 1553 3268 3092 6589 38111
4113 10888 10787 11249 11250 11809 15546 10939 35120 11398 23451
4114 9163 9166
4115 10728 10894 23450 13944 13063 10113 10096 10119 15539 23545 21213 20775 32928
4116 3928 1855 1852 1850 1848 1846 1847 1845 1857 16357 32414 9923 40576 7466 15035 23284 35996 14846 33553 15651 25992 21251 31985 21239 15118 23282 14848 33874 33501 37431 32121 28479 9925 16010 33328 36679
4117 3493 4487 6324 1454 1417 128 3526 35440 40120 3525 25784 9808
4118 722 5170
4119 29863 25476
4120 1644 128 2168 9494 3733 9495
4121 3419 4430 2365 917 4119 8337
4122 32158 28026 22363 21548 23666
4123 34987 38095 11118 32696 27120 9531 29422 23767 23768 33512 37941
4124 1806 21846 17414 22784 21227 10888 10583 11816 11325 33594 13607
4125 2840 19809 7303 17759 978 569 5953 35192
4126 40318 37191 15710
4127 6987 2411 12984 15908 8252
4128 198 4466 792 2969
4129 25885 28652 7064
4130 32693 7528 10802
4131 10689 28731 18903
4132 10031 3353
4133 4610 402 623 12324 40912 4622 4570 440 5888 28634 8021 16496 8685 559
4134 912 1059 11765 20871
4135 1183 337 2553 24018
4136 7994 28544 13113 3607
4137 22333 4428 9185 17441
4138 3012 51 12144 1609
4139 19887 6058 15611
4140 28533 3380 17649 997
4141 5896 20548 27392
4142 20157 17520 11496 10041 2240
4143 8953 39117 32884 20177 5192 19987
4144 7550 13272 2662
4145 930 7111 14767 12988 28447 24939 4702 3356 1864 3386
4146 2933 14323 8978 6732 1504 1278 1503 20980 17735 13837 5430 13664 4882 4878 17268 7649 5585 36943 28466 2334 20576 18182 20108 13189 27687 12115 17685 7643
4147 1264 15288 8108 114 11987 5991 11327 38855 9405 28574 6012 11961 1215 7595
4148 3933 3119 3969 18216 10438 6847 1843 10036 692 12953 4236
4149 3969 3933 15314
4150 15758 1857 628
4151 602 642 17320
4152 15029 4233 12332 19473 16599 18487 1034 25370 2927 40474 16555 14453 11501 18443
4153 34875 40367 26436 28337
4154 17403 26312 19107 21259 16146 21260 31502
4155 32960 22522 22830 27755 22839
4156 27961 24508 30256 21943 21129 26367 21145 26961 12190 40760 30556 24984 33729 37387 40398
4157 30447 19653 30476 30478
4158 837 3295 4914 141 1609 37942
4159 8104 20585 3270 3269
4160 31241 13664 1463 8266 28107 37069
4161 22024 20311 15753 822
4162 34754 40145
4163 24294 22971 25683 24692 25738 24667 37617 22446 24436 26430 23698 40635 25349 23234 33336 23027
4164 19707 19197 4962 4964 4961 22299 4955 8346 4947 9478 36915 19864 5231 19178 18448 35509 19179 33522 11880 7916 1811 26736 26735 17970 13356 7667 26734 7576 3164 7672 3155 7578 23265 7658 23266 17501 3144 9789 7664 20441 6037 5489 718 12730 19214 13075 19260 19207 20459 7611 35666 13215 20416 17181 23076 20137 4975 4974
4165 37588 37587 37383 38887
4166 21904 24054 22366 21933 24711 21696 27495 22425 27899 29550 39664 22966 27485 22999 21906 24565 33792 21914 21905 29189 29799
4167 30675 8027 8005 17614 26146 16019 13002
4168 11851 29866 3275 17456 34964 30644 18861 35997 17810 38364 9764 29390 31882 28056 29862 23460 24386 8102 8103 18177 13543 14748 14315 34298 51 6455 7605 36576 3261 14755 14749 35021 17469 10521 30653 25480
4169 36947 22600 22501 40578
4170 23024 22951 27898 23535 25605 22539 24710 24637 22625 26621 29202 37957 21180 22902 39807 24542 10885 34186 24121 22946 34850 35368 29019 22529 37295 26067 21172 23025 24296 21949 23912 22421 10884 22937 22974 26440
4171 4430 3407 2525 1165
4172 4638 21715 5218 5217
4173 1242 2206 2469 39354 1293 4470 30881 8218 6916 8248
4174 40214 34778 10878 27935 29504 32505 21342 22171 20712 21138 20727 21181
4175 4294 1317 283 13658 27699 21008 34792
4176 23459 23808 19876 18306 22114
4177 3261 4153 7952
4178 2019 29397 822 29406 51 34681
4179 4526 2119 2467 305 2484 814 1601 373 805 194 15896 2362 3071 4657 19063 14391 14044 5114
4180 34142 16319 16310 19099 40511
4181 17012 2319 437 408 1430 14175 6944 8620 17906 8214 1242 11736 40541 8906 37300 8150 160 1236 33062 559 18848 8773 8660 6029 8053 1207 33947 26917 32680 18574 12295 12266 24332 13331 35016 5161 28955 39575 4567 31034 13904 3732 190 20908 4585 39196 12319 18550 13915 31926 26012 6976 32221 6963 8054 6942 38111
4182 4851 33793 36549 4495
4183 2327 11694 4640 3087 6969 3082 34477 559 11880 19776 3045 6147 8214 2317
4184 26344 36412 40653 27950
4185 9592 34424 27031
4186 40509 40500 23015 30225 29042 28325 23919 24455 23671 27940 29102 22364 23911 35212 28265 40622 23025 22413 37347 23509 23233 36385 24713 24696 22491 22562 26479 25308 35101 24436 22438 24193 32983 40889 36595 21864 22637
4187 2116 14817 2323
4188 33076 15909 30977
4189 39104 31971 32358 24801 10485 501 162 10525 10508 1169 13096 7458
4190 28059 29822 25313 29816 27757 23901 23723 23214
4191 6346 5676 1125 26752 5002 51 1249 10669 13203 5147 8359 6452 22351 4578 16982 3457 9151 19994 6881
4192 4237 19887
4193 14755 20075 3274 6012
4194 1557 20701 2347 10360 1617 1594 8802 20504 8988 13386 247 28037 10326 37693 8890 4629 9356
4195 4905 17268 4242 15290 10998 34804
4196 25795 16223 10495 39890 38891 36553 39889 12273 19069 20262 313 2319 2144 2567 547 409 16504 546 8614 18746 30293 12544 8695 445 6029 5423 3079 8799 8798 318 317 6141 559 4531 22853 24370 5933 5928 296 5565 4598 7417 13886 16479 14283 205 8778 447 6624 2263 10339 8692 3109 28114 4490 5211 5445 19578 19579 9894 3759 12308 5636 1594 192 13306 18775 31925 13798 4622 8785 13135 6975 2067
4197 554 15267 3309 2954 3902 8324 600 26009 2956 1981 566 13398 12970 4707 12789 14601 20330 1609 2976 51 2525 18520
4198 22563 21948 20727 25700
4199 6413 12316 5391 8622 8896 7355 11703 2266 3093 6398 3076 11383 3070 620 6981 38055 16527 3024 405 205 38562 35004 3021 8592 6646 621 18402
4200 13758 3419 30522
4201 21276 34917 14637
4202 11511 32942 887 28148 4024 1732 9481 707 154 11557 31233 1724 10042 12560 590 24029 10039 2966 2929 14473 882 31517 4124 6677 3834 4123 2281 16023 3833 4173 4122 5058 3983 19129 894 16195 1747 15736 1817 1869 3123 9446 12591 3953 3866 4116 11533 20291 11475 3947 27024 31248 3887 27026 20879 1814 4349 593 2396 1930 917 3980 12536 22006 11559 14925 11099 11524 23145 15011 3202 16025 3204 2962 663 20212 25403 1825 15633 2380 3555 1717 1933 11553 6522 1729 615 2415 1811 7681 17793
4203 11557 4079 1067 1910 14603 2284 283 9793 3261 3250 3352 6751 4003 600 10044 1956 6839 40810 1096 7758 15076 25936 7967 6843 3386 2380 3348 3382 1726 1264 2525 10607 990
4204 39119 39966 1811 4344 11141 3323 39756 1923 2525 3154 29720 17765 10866
4205 26791 375 7077 160 17332 1674 1407
4206 9441 2965 1048 4707 2923
4207 35737 39035 20158 20161 30328 9234 33911 20640
4208 820 677 17730 6842 12901 13444 11531
4209 22880 23309 24492 29800 37763 24556
4210 3191 2337 14041 19277 17425 7839 19421
4211 17468 30611 30612 30613 14755
4212 18273 16218 33942 28088 26766 5928 5906 5905 5923 14086 18383 14062
4213 17440 34677 19855 14744 7534 8266 1811 26040 15141 7156 17860 7177 2748 16256 7179 7278 14353 19148 9186 16766 2729 18252 13756 7152 5110 30635 2734 7281 20188 16251 14642 5115 7054 9661 3615 2854
4214 559 3868 9345 15465
4215 18446 31499 17126 13503
4216 14591 1970 1972 3559 1029 3914 19472 3199
4217 10109 10942 32433 13084 10787
4218 19476 7872 7865 13205
4219 4730 4819 5042 4871 17400
4220 2067 1835 194
4221 2510 2265 6595 32812 36326 10350 11169 9618 2295 6611 8890 9634 7398 3055 404 2257 2256 2345 17189 31028 6930 38117 31767 36078 39649 38055 33961 2291 6387 2467 478 6570 529 2241 15555 3049 3048 291 4521 4838 1556 36248 309 1479 2483 2315 40949 6573 31368 4519 3092 5578 8816 8815 6550 3441 9026 3433 20923 3432 15411 2319 6561 2238 533 6632 12297 447 6638 403 9626 20109 9629 9639 10374 3044 3031 6376
4222 20580 3727
4223 207 369 189 5887 2305 15132 821 722 26583 27020 1076
4224 9808 18090 35535 5879
4225 23015 26376 23670 31946 38382 10878 33692 38389 22578
4226 3749 4397 9535 9536 9545 9560 9537 9538 9547 9557 35448
4227 11488 8220 21739 9769 11490 28008 1165 35420 19949 30384
4228 29079 35251 25445 34331
4229 8394 8026 8465 29370 17073
4230 3085 3784 32210 10495 4458 208
4231 20012 179
4232 3044 302 7371 4620 3091 2315 310 5421 2299 1428 3025 2252 13446 13392 12768 628 35265 992 3737 6052 886 2635 837 15409 10411 132 13827 2337 4162 9332 3894 722 30399 4294 39892 6609 6599 3038 8884 1436 1437 194 2461 16749 3027 35001 477 13130 3304 37857 6147 160 7682 718 14235 11145 128 3711 1352 4519 28633 559 283 2525
4233 1754 16290 16275 4429 16287 9671
4234 12462 8968 30510 30509 2525 21303 3880 2956 6520 699 888
4235 16026 19303 14455 34152 26238 28466 34636
4236 16968 16966 14741 14739
4237 13452 2394 19311 5589 19745 32407 22005 17890 9721
4238 16815 1821 2525 17685 7648 642 1509 192
4239 21154 28663 21182
4240 12576 28474 2800
4241 28840 6515 18276 5898
4242 10589 1165 31640
4243 19661 8865
4244 306 187 17103
4245 21913 21142 24156
4246 32384 970 3594 4186 16044 675 6692 12724 861 10030 1033 25386 21994 8341 8330 16343 9314 9717 10012 24939 15210 19747 19412 22679 40084 9719 2636 16118 14659
4247 24230 21948 20718 21703 21166 21577 21132 21540
4248 22380 26686 22895 12186 25116 22921 23306 32300 22433 25334 21536 38024 23030 21548 20689 22187 36799 28269 22422 23011 22364 22405 28209 23896 22578 38661 24430 25065 25740 27022 26085 29824 32298 22831
4249 2472 9642 557 5775 6928 14755 3261 718 37285 18937 26831 4236
4250 30170 39605 21536
4251 31157 38518 29767 31164 33717 39055 31321 29564 31323 25668 33714
4252 22876 21536 16436
4253 16121 16123 29602 16127 16153 38197 37168 16145 29873
4254 39382 17406 25747 22597 34713 29824 21858 37387 22578 25876
4255 24568 25574 22377 25116
4256 17484 33459 33456
4257 22642 30262 19007
4258 25851 18999 18998 33465
4259 194 35128 7388 13339 2526 6619 11127 39677 529
4260 9479 5268 10082 18457 32336 5079 12445 25781 8345 18458 5345 6121 5226 11988 33523 25803 18463 5223 4959 29555 25891 32509 19218 5237 12015 10070 12014 4962 19541 12399 9778 39704 7611 19259 4954 12017 10060 10071 31851 10063 40915 12011 3549 22294 10075 18100 18067 4957 19015 18180 30798 39322 26013 23047 9476
4261 38799 39281 4202 35848 37260 15839 8013 8913 3605 31 33665
4262 38 21 33
4263 18878 8981 17798 30412 10689
4264 3256 3259 3281
4265 17030 9808 1811
4266 20582 31771 16081 28890
4267 10706 10583 10551 5505 10947 24397 11293 13656 10208 10586 20771 11400
4268 1163 1199 18188
4269 33701 20341 11079
4270 38984 16141 21255 21257 23691
4271 14101 14090 16218 5953 14082 5903 5929 18357 27371 14919
4272 15937 15972 11141 14763 2397 12583 2525 17212 1026 20666 1217 16793 14940 9255 18917 3562 9244 16799 1352
4273 18151 35862 3446 7564 6546 1665
4274 978 18368 5162 6452
4275 39198 27187 26275 5174 3800
4276 34257 11784 14332 24356 24347 20386 28391 17608 14687 13622
4277 7695 1168
4278 1717 11510 466 8310 14731 741 9473 8252 1766
4279 7492 466 12967 15653
4280 1034 667 1051 1843 34504
4281 29966 30007
4282 3281 35018 17463 33330
4283 38522 38520 23869 22651
4284 642 2775 2697 5105 14375
4285 29987 34098
4286 9653 13326 35226 458 2551 2307 805 9638 622 12324 12308 1321 9115 39626 1292 375 6581 31925 8021 1601 3022 3420 13668
4287 6453 14896 4531 28849 26776 27378 5162 6452 20310 36583 30537 14075 14080 32900 14054 5877 5902 14087 14061 5928 39594 23966 23967 27391 37422 569 37420 14903 11884 5938
4288 13324 13141 1428 438 34940 12155 6204 12180 29233 5012 11371 8933 24791 3786 529 35383 7579 1352 559 8587 479
4289 38786 2976 2971 2525 2944 892 20212 16644 11556
4290 5808 2192 6918 160 1538 4294
4291 13770 7053 9282 31828 7056
4292 33992 35765 19515 15137 33991
4293 30829 1863 2382
4294 12210 3958 893 15268 4133 32292 2635 701 15691 1048 1759 4011 12862 651 15496
4295 23836 24591 1284 18888 6733
4296 16425 25847 12466 25504 6423 1023 978 2337 37088 34154 17665 29689 15121 4755 4753 29686 28556 33985 14041
4297 16885 2525 1627 1355 12810 29402 822 559 2635
4298 8537 20282 19958 1169 8219
4299 6774 6773 33067
4300 187 3397 2527 27027 4230
4301 16374 33550 13842 17700 8532 13221 14797
4302 1925 2493 3224 4202 17498 459
4303 16190 35519 14649
4304 32521 15627 7119 15624 16985
4305 2337 642 1842 14529 11514 2525 283 2432
4306 9894 17608 35732 40136 37655
4307 15245 3974 36591 628 1937 609 1842 35505 35507 4229 1811 7269 38149 2337 8142 559 3419 2525 141 1650
4308 15406 13398 1773 4131 3318 30349
4309 554 2365 16869 5056 628
4310 34708 29167 29166
4311 24503 23665 22966
4312 29878 33692 4680 28826 22582
4313 16435 16424 32687 32185 20345 21417 14812 20334 32688 34156 20336 20348
4314 25851 19106
4315 29724 21606 32480 29332 25116 25518 23902 27502 40648
4316 25854 30811 16730
4317 10882 22580 40126 26062 36869 23225 25706 38806 38923 38810 25072 22522 22493
4318 30176 9597 25124 28676 23108 25018 37471 26446 30833 23929 30177 9588 36751 24039 24895 27309 37175 27315 27655 9591 28753 39282 34565 21520 32500 38546
4319 9187 16256 2721 2843 2723
4320 23031 24886 27951 23385 29731 27960 28045 37018
4321 17405 22719 22387 27755 22968 28462
4322 10787 2201 5551 22862 13645 23451
4323 27964 21536 31794 24590 25350
4324 3252 1930 14634 9270 18898 1085 14608 628
4325 5211 35286 4422 18541 4423 17190 534 1222 14949 3047 39223 3051 5421
4326 3192 18818 33942 39339 5938 18273 5870 14092 18380
4327 28503 30212 19127
4328 30985 24004 35747
4329 24012 10482 10525 23808 1169 35646 19894 19679 3806 26263
4330 10271 20034 19065 2364
4331 17573 22688 29163
4332 15287 11347 11348
4333 10511 8099 20939 19368 904 903 167 8096 12459 7604 17695
4334 202 4646 2885 4441 7044 9678 2493
4335 24580 27738 24200 26695 29338 25592 26325
4336 14128 11164 23989 11711 6204 13339 31769 1469 309 529 12180 38111
4337 21289 829 19536
4338 11930 40611 38008 35974
4339 32693 29421 9411 31676 34986 9407 17255 17256 9403 38095 11159 51 3191
4340 26293 21373 19669 29737 25852 19003 34907
4341 21891 35792 38844 27641 37536
4342 24752 2232 14956 9237 23241 7558 14959 2198 32012 16806 1128
4343 3977 10040 852 14452 20134 12334
4344 26040 14381 7301 29428 35264 2863 16775
4345 21842 5959
4346 7353 32224 311 774 205 8794 319 778 3764 540 559 28133 160 4398 1242 11736 15281 37864 25765
4347 17452 20833 2782 26266 2735 5110 5104 15874 11587
4348 32217 3518 2351 5411
4349 29508 23505 22718 26954 22635 22524 23407 16019 37361
4350 1281 12476 28619 1487 12491 13512 13515 13479 17342 34628 13495 14329 28584 5203 17201
4351 37810 34642 22640 22918 28592 24454 25879
4352 14962 4719 18288 10867 26737 5604 20916 31507 4430
4353 17687 12257 7451
4354 370 13633
4355 28862 1115 1699 11306
4356 38365 39796 718 160 4398 1236 14301 5321 3462 34051 37977 1580 31196 15424 1565 1435 6392 38002 39899 39191 18143 6638 29230 13674 2307 15888 20169 32885 40308 9375 27173 23159
4357 2665 10046 2525
4358 61 58 69 116 25991 93 10970 85 6010
4359 29079 15578 16093 24004 16095
4360 4888 21426 4242 15112 29392 30358 25847 26915 16369 18311
4361 20421 5237 33361 5258 5257 5265 5260 5259 5263 40024
4362 19683 19958 19870 19974 19968 30516 26565
4363 19915 19884 19974
4364 19572 14684 31464 40371 32026
4365 17322 9461 6529 13778 18491 17539 7021 2337
4366 3810 5141 1504 1462 19699 7782 16200 18607 26519 7735
4367 12415 36815 15465 4540 669 2380 19290 3944 1099 14799
4368 36707 16234 10874 12740 14443 35207 32648 12781 12787 8841 4166 29902
4369 31564 36448
4370 11995 23052 2971 35330 2432 21660 31222 37200 31577 5893 2437 7771 2434 7796 11045 11048 5343 15998 5440 5344 22288
4371 37143 17391 5142 12517
4372 18361 6708 978 3096 559 30976 14930 17245
4373 4430 9775 2025 6360
4374 35348 7796 20195 7764 2435 35524 16450 16449 2432 4968 34441 32182 1264 1265 6108 11075 6011 3191 87 7513 25981 3730 7580 11015 11054 1213 1 11074 3278 11724
4375 1870 3297 6488 2367 31976 628 837
4376 11045 3551 3549 718 141 2337 38031 8133 8906 15837 3598 49 15828 7998 8134 25657
4377 718 1537 1509 1508 1502 12207 1500 40264 11089 28692 1507 15061
4378 2305 4640 13312 2127 4519
4379 7152 29447 19806
4380 24004 16091 35252
4381 1102 12355 1059 1861 2913 3357
4382 2337 3899 19630
4383 34334 4661 16159 4665 9550
4384 21010 40870 27894
4385 33592 26407 31715 38065 39143 40898 28806
4386 22918 21522
4387 8906 15589 13928 6860
4388 25649 16123 16120
4389 22609 22578 22519 17405 24965 22966 21920 22835 22635 22459 22378 22918
4390 32497 23697
4391 21908 22377 21905 24284
4392 21573 21546 30189 24517
4393 33588 16123 29873
4394 22582 26352 21536 38308 27313 37471 27655 29011 23297 26048 27256
4395 7547 31069 17403 37714 16141
4396 6589 2317 14187 26865 559 978 11944
4397 29075 29086 32929 10690 39462 29649
4398 10804 15626 11005 29259 4327
4399 7927 13148 33042 33044 19162 7791
4400 28639 18504 38643 16069 3559 35670 4120 3564 3565 3566 16029 25779
4401 17197 575 8104 8170
4402 6647 410 2309 31927 194 19982 20175 5421
4403 18138 6034 18022
4404 4430 16350 3830
4405 13322 4568 12265
4406 17542 23328 17316
4407 30253 22589 30260 27281 23927 23108 34182 38317
4408 21539 20754 22172 20722 21158
4409 1513 1836 14765
4410 642 26536 5981
4411 20534 17571 30811
4412 10414 3322 6684 3915 160
4413 31684 25565 21172 22362 24070
4414 2127 6445
4415 25406 20952 21289 2908 23380 32548
4416 21559 6482 1082 4232 3397 38865 8323 16352 20407 14453 11468 4118 15076 4120
4417 4906 30503 21222 29392
4418 16024 6692 2491
4419 693 463 30334
4420 8723 8721 30337 4986
4421 24054 24173 20727 31941 27581 40599 23914 40493 40422 21948 36002 22386 21536 39376 38781 22151 23650 28304 25600 22719 18295 26830 26827 17406
4422 23765 9907 7417 18760 19060 15555 20012 8020 14297 5011
4423 8906 10689 3604
4424 1076 1843 14712 5317 2640 1894 12778 24021 3894 10872 1873 11757 24603 30905 1836 11152 559 14175 3955 12683 4540 847 7634
4425 13969 14037
4426 14580 32420 28481 14541 32586 14563 14567 14544
4427 4202 18948 32034 14529 28730 10689
4428 559 978 31668 28631 10225 15905 16750 10227 2250
4429 10601 12723 11519 13375 28474
4430 9845 30660 34068 32016
4431 2021 34921 18281 33400
4432 1538 14510 3875 2961 1728 14698 2970 945 40022 13784 6047 4327 8265 2525 10040 2962 741 7633
4433 14665 1821 4344 5117
4434 726 22005 34967 14701 27639
4435 5438 3065 35902 1165 15506
4436 22843 21074 3343 3341 16109 11584 30810
4437 2432 160 6624 8699 17007 2263 25211 9396
4438 2538 165 10502 33475
4439 7114 40548 7122 1295 1257 1163
4440 12197 21564 722 559 7393 798 34877 18405 12625 6734
4441 17463 3242
4442 20221 23996 2337
4443 10026 559 8262
4444 3776 14840 5612
4445 837 10713 9241
4446 11491 22104 35420
4447 5492 13815 10694 1537
4448 2337 19630 12257
4449 34982 5104 2754 2876
4450 1023 19239 2503 2196 1135 6755 10955 12947 26000 37832 12948 32848 37242 4545 10694 160 3735
4451 15060 8444 14322
4452 36039 40085 5673 1182 6162
4453 13257 283 16586
4454 15389 1636 38974 21024 3701 3685 3683 3689 39906 7082 37783 37971 3681 3687 6250 35619 19346
4455 1771 701 15681 12873
4456 6816 10311 7359 6148 3795
4457 4422 14294 23990 32909 36984
4458 12377 21068 1476 4841 31912 1594 452 8890 9013 1307 128 3113 4493 9030 39699 1454 9017 3432 3443 34130 19563 8889 37625 1617 559 3441 6325 3491 160
4459 17057 32345 18644 4519 37794 3768 17055 3092
4460 10216 10712 10203 10715 10114 10556
4461 20592 35524 20195 7771 2432
4462 13757 7159 2843
4463 4519 546 13912 3047 14175
4464 15908 13952 36096 917 20879 18529 30903 15658 13390
4465 10604 33992 3426 19514 26904
4466 38390 36777 22595 25351 23518 24058 22432 22506 27197 22414 33219
4467 782 8693 27028 2533 15276
4468 30667 35165 27613 36294 29471 26987 38497 29472 40093
4469 19106 25857 7546
4470 22657 21536 23532 29768
4471 9914 21368 16145
4472 33717 26048 29303 22841 22723 33441 27069 23297 25024 29024 22735 35816 21536 38173 21573 26463 26092 21948
4473 26880 36323 23592
4474 33586 37023 21910 35616 35618 21891
4475 34174 22578 27229
4476 29587 30735 25825 30733
4477 20998 28601 4200 36927 23655 37272 32387 23654
4478 21536 29305 39452
4479 13846 20014 6284 6282 6258 33484 37784 5150 6715 128 9010
4480 33993 13760 19514 18259 33981 30522 13865 3419 29935
4481 21929 24293 22401 22464
4482 6942 11353 11354
4483 28132 36680 5104 19433
4484 25097 24912 21590 22319 20727 22117 33810 13858 13859 40821 23384 37019 26491
4485 37588 33564 33769 36191 31216 28713 37764 10880 26467 22827 40620 21536 28324 36384 27569 27584 27575
4486 11 29027 3605 36 29207 4700 10633
4487 18623 13858 3604 15853
4488 32194 30981 18707 14976 26570
4489 12376 15232 6151 2220 4280 21721 12518 38106
4490 8263 4231 33280
4491 33472 19907 38154 32133
4492 15611 5163 39403 13708 5928 35288
4493 6568 28408 4368 28419 336
4494 32841 32842 34588
4495 11609 15676 8251 20131 16238 12900 3367 16619 9271 636 40474 694 9314 40234 4231 31590 4346 19751 12745 18487 12214 11129 9721 878 33882 2525 837 9233
4496 8404 5178 1493 5172 13751 9894 1686 2498 5211 23440 7098 9389 13641 1628
4497 6835 13540 33802 17790 2717 14374 17780 34510 17778 7226 2826 17830 9987 14347 7155 35280 26040 15141 19500 16755 2693 7171 16768 7154 30959 2843 7156 17451 28043 22749 18492 39183
4498 7873 33666 20363 30860 14003 14638 27458 32665 4764 5056 4766 3609 13993 3261
4499 30191 24497 24542 22450 26963
4500 30227 17805 48 29359
4501 4319 18030 4317 4273 25949 21183 12432 17045 7440 18880 35185 7435 7434 4254 32255 35326 12428 4280 4296
4502 24354 31184
4503 2365 3744 18632 34626
4504 6741 16928 15337
4505 11193 11194
4506 5980 10961 115 38573 38357 16207 3219 25980 2971 12013 2337
4507 23297 26448 9584
4508 5849 19587 21306 30372 6291 6528 6285 12098 5683 5816 5310 1120 6230 2429 1636 1302 2585 2586 9173 5785 386 416 3627 1237 131 1336 1625 14500 326 422 6324 12097 18169 2603 379 1414 1665 4432 3510 177 6339 4367 160 1242 13527 7443 37783 1674 14301 1344 9161 4510 1189 15442 7072 5074 3521 9081 7445 40607 10669 1349 3487 213 391 1644 4451 9143 336 20254 1128 6184 3655 1127 378 337 23842 1405 6882 2624 6098 16471 18166 6269 30371 6347 7444 232 5838 13531 30401 10697
4509 27443 1023 22090 3574 1017 40328 9998 1022 1020 1021 16059 13291 13275 28602 16319 36382 16265 141 18036 18018 12021 28970 7850 11860 18037 13248 4735 17981 3192 19089 16320 19083 19090 21727
4510 934 17267 470 10035 571 7897 6687
4511 691 13202 586 1929 3907 953 34263 155
4512 978 11058 8095 33509 8704 19521 25997
4513 7794 16208 13648 11852 36833
4514 29555 9832 16306 24360
4515 8429 2649 15061 1536
4516 13660 23160 20013 13662
4517 3310 16383 2337 36717
4518 21662 10812 21666 7770
4519 18800 39506 15611 1317 283
4520 1141 21305 7078 9107 1225
4521 10641 3591 22744 40187
4522 11868 11888 26903 1537
4523 33213 26782 5340 7306 25630 4335 8511 32375
4524 16662 36054 23314 12878 16659 1106
4525 22764 29833
4526 17474 14747 38554 26039 1537 31499 9163
4527 3089 194 3739
4528 15061 39284
4529 36347 40017 37955 28371
4530 8720 718 12677 20927
4531 10510 36555 28016
4532 39039 5510 38975 30434 8239 18520 4911 5519 14639 18400 1023 32628 13173 9220 36128 9228 18050 33399 20637 20641 10694 17803
4533 38787 31957 22366 34837 22554 22401 22903 32298 40368 26721 29551 37985 23516 39466 40744 22535 27022
4534 32441 18425 17752 28431
4535 11060 978 1287 129 35448 29125 441 981 6044 1609 7461
4536 13353 13359 12062 13842 3166 1811
4537 1937 8128 20244 3154 33666 30904 15109 1933 9270 3263 2923 3937 3367 12683 9458 9730 3983 2635 3328 3920 20052 7458 2927
4538 24501 30312 29726
4539 6130 1446 782 187 19479 559 1811 4430 9678 2525
4540 19443 5241
4541 25766 14552 14529 39146 3419 17483 25768
4542 14235 1610 3038 194 2150 29945 2324 31367 3039 1616 5378 16486
4543 8193 35190 23312 23319 5080 11842 2692 19143 2659 34788
4544 13438 12443 3988
4545 30683 25459 2702
4546 10106 5457 5488
4547 31611 8568 5195 40299 39817 722 17436
4548 26263 22267 507
4549 13579 6362 4956 3812 32510 5172 5343 19042 15531 1537 718
4550 35013 34096 4325 30943 30168 4337 12963 34230 4303 37416 275 4318
4551 14640 4888
4552 2950 2921 34032 5168 718 13257 17080
4553 9822 33965 18746 20907 3795 7627 16262 26570 19090 16261
4554 30045 33287 12439 1169
4555 2731 2825 3127
4556 1610 559 2474 373 13800 5379
4557 5132 11085 37723 5134 17740 13386
4558 1802 21006 13425 30112 34522 18940 30109 40576 35592
4559 1721 915 10043 1087 4037 1853 468 11125 11124 6664 463 464 23145 29272 19747 16937 2635 4416 1811 12850 28139 560 925 9732 21112 6499 16114 28149 19133 23547 16118 3192 628 571 2276
4560 6895 2234 1693 1703 2633 2631 22276 9500
4561 4511 30602 2508
4562 16785 20069 20516 35636 35458 5401 1603 2106 23959 17066 22819 35267 32201
4563 36058 32668 13992
4564 5738 30809 21097
4565 18039 12069 34289
4566 1010 28442 30412
4567 18599 12231 7735 12244 3183 7725
4568 9239 15547 11818
4569 4100 4033 958 2993 3830
4570 4039 614 15072
4571 16238 9268 1908 17732 1855 18338 18487 14731 11507 10422 18421 27430 1910 32384 34813 36257 7054 2393
4572 11632 7330 51 29544 1538
4573 30252 31167 26130 21941 31401 25307 27515 24578 26455 31388 21158 31291 25195 30255 26959 21592 31284 31389 25102 40705 31301 31283
4574 22522 21155 25076 22615 22640 38307 23306
4575 1169 1609 15600 1023 1025 33341
4576 27518 22405 27502 23670 20727 23867 22592 23523 25437 26830
4577 5560 525 7592 2880 5112 543 832 16260
4578 30153 14810 20347 20344 16419 32685 20334
4579 51 2673 160 1537
4580 19762 18054 16678 13033
4581 27329 23340 38754 28067 30834 22464 24973 8844 21921
4582 21520 26049 33382 23927 27079 27278 26446 23108 37830 38812 25096 21182
4583 3154 6110 11894 718 33522 1026 19240 1023 35297
4584 25692 27755 22839 22551
4585 37199 5368 5374 1537 6477 1755 7936 14467 11468 2387 9881 8460 19696 15519
4586 19739 493 10524 24854
4587 36204 21116 26211
4588 33231 32268 14866
4589 19683 14866 19974 19968 26199
4590 15158 14414
4591 10163 26235 29945 33296 911 5515 20526 835 8366 7209 830 9216 29415 9213 18630 19792 2011 15343 837 2018 5512 2020 2019 20522 19337 824 829 828 1628 8966 16920 24026 39860 33048 20236 16945 13251 4703 29269 4858 13993 13999 19309
4592 5703 9496 18917 1646 8993 1307 5297
4593 642 5430 12646 29927
4594 11891 6423 4850 160 718
4595 21531 30369 31239 17484 22722 21124 21869 30672 8849 38607 22156
4596 6088 22076 29655 6275 6359 456 19210 7659 7664 1811 2591 12661 461 10967 26571 1236 160
4597 11879 2624 37972 30847 1263 1632
4598 24352 9835 7977 14594 20386 36925
4599 3617 3611 4769 4827 8532 18291 3618 21424 3261 17810 1265 1264 7877
4600 2289 2097 33059 18112
4601 22 13017 18818
4602 3493 5780 37785 3432
4603 8266 2635 3215
4604 9280 17317 7021 14656 20116 14661 3406 15722 30982 7013 13779 16283 40383 34750
4605 2958 3250 6846 18337 16367
4606 17742 37491 27128
4607 1811 12342 19095 18287 34790 1029 628 642 2337
4608 4545 20365 37334
4609 9412 2518 32696 11159 35675
4610 10806 11003 15281
4611 9206 1811 19161 35838
4612 31279 10605 15142 14529
4613 39766 39209 25319 25077 24403 28796 22911 25116
4614 26491 40860 40932
4615 14111 33955 14892 5926 20398 26774 35436 18364 4530 2446 5923 14060 27363 26218 4531 18371 14919 28848 26767 37402 14077 5937 14062 14932 35535
4616 7758 2397
4617 12889 12831 10019 12598 16677 12787 9714 2635 1650 13836 29432
4618 40218 37678 23108 22149
4619 25341 22322 20747 35053 20749 21529 22130 28156
4620 1638 39194 20273 15946 6903 34777 1668 9195 13259 1393 5679 16806 2611 1298 8216 3797 3487 20986 1164 6248 9173 5320 6888 22066 18264 5292 20984 25223 15981
4621 3288 15025 29918 14920
4622 575 1811 3615 628
4623 1030 14917 21978 8543 838 7746 8542 13021 27107 27106 21359 8150 8906 37224 29393 2493 992 628 994 661 15462 722 13664 642 7111 2525 2337 978 3012 12958 8239 718 40822 37766
4624 28682 24894 26778 25520
4625 34917 852 849
4626 15249 9823 1288 4363 2506
4627 11914 34682 29705
4628 208 1209 2362 305 806
4629 17030 17034 11855
4630 2364 18517
4631 1868 13390 4778 571 691 2947 1851 1853 1852 673 152 674 934 29130 4039 6843 1042 1850 1848 1847 1857 1846 1845 1849 8320 18304 744 1930 593 2392 29661 15647 34357 14451 34532 2284 39610 4811 17930
4632 1288 3697 1805
4633 33284 35487 16141 29586 34688
4634 35507 991 1836 2405 605 1749 24021 9458 17925 26250 1993 9344 3392 26044 14609 3244 15132 3956 887 2680 8142 2531 1034 8252 3199 10036 12006 3349
4635 17852 17447 28984 32036 3261 2220 10694 2843 7125 1816 3841 35219 2525 642
4636 22961 22839 24590 22719
4637 15072 28534 9471
4638 21520 9597 26416 39091 28804
4639 35798 37272 12340 13270
4640 3216 2273 3196 628
4641 38453 36640 22001
4642 1527 40881 1528 12618 21244 37453 21245 8385 258 257 13512 1526 1524 1525 39437 5188 13513 12491 12487 13514 12488 20996 12489 12492 39886 13479 21005 28570 1513 39822 1519 32014 37500 3810 8027 17373 12626 1312 20376 37659 26007 1508 13504 13505 17215 1506 1277 32596 1502 28896 39163 3413 5430 5131 12329 13277 8570 276 8436 32189 15059 17222 8485 1537 18445 2971 6999 10830 837 5521 20668 15753 15754 15744 33399 33332 20640 5510 33887 33931 25859 38880 16905 16904 33930 18281 9228 33918 28457 20158 20661 829 9309 19785 9232
4643 2525 8310
4644 4205 12334 17703 2664 2367 4204 19053 1937 468 3950 3262 32145 2283 11108 8152 693 8126 12988 4914 20210 564 39367 2681 1910 1843 2954 16561 4077
4645 31679 30121 22803
4646 11685 11678 11676
4647 553 1320 187 2096 4465 6588 16515
4648 22592 23524 22980 22545 24622 10878 22552 22451 24958 23501 21536 22278
4649 20344 20348 21418 38860 35945 16435
4650 19018 11931 5452
4651 22194 38602 39402 21529 29541 32094 28156 21158
4652 40462 29833 1022 15171 34449 32816 16722 16711 19007 19117 9920
4653 16150 17403 32847
4654 3154 1004 1509 1502 35040 5195
4655 13169 715 935 4045 12990 3607 11759 3373 38873
4656 14786 20951 15355
4657 16740 32608 9920
4658 5237 16168 7531 5607 2940 242
4659 23946 2003 22053
4660 16321 30739 16259
4661 2652 2653 16046 2655 16045 2654 11720 1015 39829 36097 15631 9469 27151 39780 39779 23130 1017 12525 9995 9996 14824 1023 27416 1010 3505
4662 27498 34639 24138 26686 32653 32889 25116 26371 35721 29800 28687 38886 23856 22883 21924
4663 10504 10491 30516 11489 14392 34293 37949 30489 13957 26565 26563 19919 17815 30491 19697 25688
4664 3273 15404
4665 39928 370 9608 28439 19346 1806 34348
4666 18130 1022 15453 32448 21679 17212 36655 13293
4667 18847 10683 14941
4668 2877 33060 33058 33061 12732 39258
4669 11758 20672
4670 2922 35300 16238 3958
4671 22623 17405 23109 31710
4672 12909 20477 13255 13112
4673 24193 24284 24278 24101 23154 24260 22879 21913 12191 22669 24487 22524 25876 24045 22433
4674 12909 13252 4914 160 40811 31 8906 4542 35217 7865 12466 23841 19741 9993 39347 10320 1023 2337 29280 14794
4675 19109 26287 29831 32185 22764 9914 20395 18295
4676 17944 33370 29868
4677 14035 9968 15235 11488 11491 19922
4678 18066 15282 5237 11880 718 12466 17840 1800 39645
4679 17364 14329 5195 17146 17214
4680 24153 22444 28254
4681 13535 15321 19496 21309
4682 19309 35292
4683 11224 10115 15545 5543 27795
4684 26947 38909 21181
4685 3092 4579 11165 1469 2510 5423 6832
4686 32139 32524 26040 26041 28043 2869
4687 2155 805 1706 4458 205 19605 2076 12555
4688 38269 7846 18803
4689 2923 8302 16349
4690 29350 21520 24179 21573
4691 4003 2637 1821 31975 1960 4705
4692 13269 13038 13265
4693 37492 26662 19661
4694 26618 23117 27196
4695 28067 27972 23397 26370 24498 21903 26373 17406 40865 22553 22831
4696 31716 35852 23355
4697 16419 16420 30158 35945
4698 23016 31335 22372
4699 13209 2924 22248 1963
4700 22412 22592 35209 35211 24430 35319 22486 27946 28024 20712 25137 26683
4701 837 14529
4702 4294 7309 5339 4299
4703 22501 26370 22585 30235 24066 22657
4704 20812 9918 16723
4705 549 6558 13642 13331 20325 9396 5775 26282 7353 8634 27826 2343 2472 6204 2258 12128 4519 718 18400 19282 6984 13096 11897 1023 12293 8828 35008 35001 309 34998 38562 35006 35005 35000 3092 22761 10966 141 17954 6924 14742 2337 559 3078 2263 17007 6624 10340 23497 2291 30724 11367 3023 204 32380 13326 1469 14300 20034 3059
4706 26285 30475 26301
4707 10597 20205 18045 15281
4708 12890 20610 25363
4709 16906 16907 5517 837 1650 2341 1656 25448 28097
4710 26757 18176 17757 26759
4711 68 5969 122 563 3574
4712 3221 18790 19297 19032
4713 12730 3008 29833 5172 13839 718 22014 22012
4714 22041 22042 5809
4715 17811 9532 14649
4716 2525 838 6921 20237 15458 7880 28625 4885 35082 19861 33444 32048 27781 4805 17668 35429 12927 4891 4895 4893 4892 4894 3177 3143 20168
4717 28134 13918 15104 13205 2525 2380 10031 8257 12772 14737 3152 3957 2404 8840
4718 2971 20585 3270 718
4719 23924 31709 9591
4720 33460 17022 25768
4721 332 3493 6326
4722 11225 10921 10223 10134 15553 20783 18870
4723 3127 7154 17842
4724 17281 16812 15996
4725 12988 3991 874 32415 12985 37240 3307 3997 30902 4002 38648 31235 15129 4706 13450 23838 1965 3394 3352 3396 13404
4726 18397 17702 16384 4888
4727 5928 27370
4728 1021 15166 1017 36116 36115 21688 5288 35229 26418 37226 28644 40521 8264 18496 15160 9871 34125
4729 7592 7664 23253
4730 29998 30016 31633 29981 30759 32836
4731 3732 8795 3059 1469 4575 8620 7364 9397 8619 3107 283 981 1538 559 30788 16493 18662 8677
4732 20909 320 10280
4733 7703 12519 36434 3217 2525 1811 10463
4734 5998 6207 302 160
4735 17408 2526 316 165 36556 19889 12439 31971
4736 24070 27753 23681 25247 28687 22378 21920 38841 26621
4737 20919 30375 20914 4760
4738 22875 29013 32788 24921 38684 23922 32280
4739 8890 6392 19573 13624 141 3231 1242 7579
4740 13344 26566 23808 26874
4741 2220 18558 3617 6760 2337 10805 275 4294 3261 242 4328
4742 18317 29570 2600 5355 6099 34074 18967 20017
4743 5272 13296 17211 30623 15168 16059 26506 11620 18618 1017 9994 14431 9436 26261 22091 9992 16835 14825 3572 14416 12525
4744 25827 34381 19669 17573 16145 33456 17581 9919 9918 34689 16141 29601
4745 36273 13172 19789 19790 33400
4746 13224 14505 51 283 2337 13238 13111 17656 2334 3154 15326 14791 13223 16374
4747 11858 26035
4748 3829 2956 632 2525 15263 3011 821 17702 2337 5895 15453 5029 35900
4749 3420 410 4646 6372 8189 14202 623 2526 18387 2464 9293 11339 3268
4750 950 630 4479 677
4751 3724 22032 3722 3727 16095 16096 16090 16087 30985 28893 16094 16088
4752 14391 33808 18186 4750 30149 29931 24028 29684 13181
4753 3933 1989 3373 6847 39609 30625 4102 15269 18695 12330 14611 2530 2032 18480 12406 15312 632 12719 722 1906 628 863 2525 8543 12998 20615 1551 19360 39855 847 9325 461 4149 11103 4086 2963
4754 8269 609 3879 13469 13206 12947 564 3243 11789
4755 4767 18559 4799 16235 31235 25847 38363 9966 35215 36857 39306 4806 28558 20234 16880 20240 3617 3607 40965 38330 25848 15259 19649 8527
4756 22841 38267 8006
4757 370 310 307 6611 18641 5015 8685 208 8157 132 4622 325
4758 7102 3606 34892
4759 7649 192 7476
4760 1515 8836 3191 1481 14319
4761 978 2220 34306
4762 13473 19943 12637 17114 32401 8470 37440 12498 28693 13474 8512 28698 36522 17381 252 5177 12616 17199 13550 1519 20995 1513 257 1526 258 256 8447 17116 7119 21242 16983 17146 5685 17214 1278 38514 17124 1503 7120
4763 11422 15544 5478 11812 11324 4635 441 15971 1336 5555 40908 5557
4764 25438 2392 4346 2525
4765 3143 7572 17811 19165 33045 7678
4766 307 7353 5000 8674 3080 20503
4767 3261 718 5087 7225 2870 32039
4768 8880 8873 6239 11137 1805 15499 8256 15503 178 19980 3668 3669 3796 1452
4769 35590 20636 19800 18581 13021
4770 23135 12052 39300 23126
4771 4545 141 21438 23259
4772 18965 18315 30602
4773 32859 25260 22433 33315 25077 26704
4774 2830 7303 7169 19029 32537 7457 2731
4775 24477 35395 28034
4776 22401 39990 31066 22387 28282 39103 24971 25039 38086 39439 22513 26365
4777 39902 13272 37137 12387 37238 38964 39204 32057 32517 32072 38139 38161 12384 14621 32080 36704
4778 27738 23704 35493 28282
4779 21174 24629 25351 27542 24194 29837 22737 24505 21536 31804 29315 20395 28494 19112 19117 19114 23176 19115 23396
4780 23221 22521 25680 26438 22998 24078 24115 22903 22654 23193 27074 23515 38390 27885 25721 32604 32709 28659 22393 25293 26658 28059 40367 25523
4781 24235 22381
4782 24626 22522 23221 22998 24078 22903 22654 27074 25727 25721 22562 32709 22393 28059 26658 23515 25523
4783 23614 21362 24425 26211 36071
4784 12382 38961 12390 37280 13266
4785 22671 26077 28323 28336 22902 22995 27254 23539
4786 1182 1189 25447 2341
4787 19003 26293 20825
4788 50 24456 30554 31445 13045
4789 6056 8366 2024 37304 2006 837 40754 38007
4790 19957 26921 32346 19949 14868
4791 28865 9562 18317
4792 4616 283 11228 2437 160
4793 1792 2099 1428 15900 7977 36664 34792 31180 38612 27699
4794 37979 34465 171 7725 17488 9813 7592 5343 5342 10082 20446 12238 17811 10459
4795 6372 16495 13158 14259 3785 3761 20260 14261 16494 3762 14153 14216 14272 36616 15508 40075 15384 16496 23481 14228 14152 8897 1611 12137 13903 39305 12183 11375 13321 28320 22283 18746
4796 37634 25100 22631 24118
4797 30803 1650 1292
4798 39771 36512 23974
4799 16265 16268 23257 27796
4800 1127 3655 6170 6171 6182 1128 3654 39621 39623 6731 3653 3636 6181 6180 6179 6177 6178 31600 5304 16793 6184 26728 22275
4801 14691 8838 1609 1537 160 8552
4802 9914 1538 19380 18702 8011
4803 30816 36484 29348
4804 29717 11770 6506
4805 2432 978 20503 20300
4806 17455 11851 18429 38577 14755
4807 6820 6790 26008
4808 18712 14406 7341 13689 14402 14412 14407 9900 13094
4809 16989 3744 7528 160 3191
4810 217 1134 10819 4664
4811 29550 23697 18702 22369
4812 32323 36667 35066
4813 12562 7135
4814 571 12726 2365 837 15242
4815 16711 26651 31532 9920 9918
4816 2674 10236 3092 3071 529
4817 13770 23328 7013 31507 7064 8195 9282 7045 20112 13777 4440 25461 17543 20113 9459 14665 5113 35539
4818 35024 34982 34497
4819 4625 6638 8879 27344 1571 18392 5428 19384 40966
4820 36794 837 33069
4821 9757 9748 18607 3157 7653 7697 9797 3155 16181 9804 19413 7733 9787 3143 3144 7728 18594
4822 20141 4702 3192 12251
4823 12729 6737 14323 18207 1548 14804 1488 1504 30872 14913 14330 722 19316 36815 20477
4824 12548 1428 6641 7416 27822 6931 40020 6376 27359 2255 15907 8593 8890 24786 9616 9622 194
4825 36793 1609 1273 29093
4826 4332 16542 29258 6070 14464 5546 14463 3189 3190 4994 39284 13386 7120 21841 12632 1314 14440 11848 13257 18455 6121 4946 40632 718 2337 19442 29681 8527 22870 13396 14001 28552 27460 13246 19649 14394 17041 30545 35372 12965
4827 9989 3014 16604 2970 692 3363
4828 4585 12265 5423 529 16746 25213 6955 1571
4829 11894 15915 34291 19282 6109 25789 25788 717 35668 23263 33361 40583 39697 33362 40024 33360 16977 19025 10071 19173
4830 3011 2525
4831 4539 19140 7832 2635
4832 16408 15682 9734 10027 37304
4833 3111 25326
4834 3434 456 28732 20574 20581 3722 10689 30412
4835 18798 10823 17511 39446 32171
4836 19247 35329 10073 13579 23045
4837 20211 25364 3386 3119 1027 16557 8239 22556 2525 3367 1818 8142 2282 1060 3958 1096 13955 9446
4838 18975 16944 10421 16013 1820 16010 23275 10455
4839 3850 4025 11551 1076 1042
4840 24879 24818 24821 30448
4841 559 2263 10309 10694 11855 40611 37743 1023
4842 4235 14974 13993
4843 6427 31380 19597 340 160 6275 5073 6291 31381 2499 4468 4355
4844 4735 16946 30869 12043 12047
4845 154 1961 11106 13574 15489 2979 11132 1960 11131 14673 28979 602 35463 13845 917 1933 465 1938 3349 468 11557 31233 18214 12560 2968 3848 2966 2929 1817 592 2958 16023 4122 4123 2281 3833 12591 19129 4142 5058 661 662 663 664 1085 4173 25403 865 3555 9432 2380 2415 615 20212 4004 6869 1811 17793 1729 2525
4846 21788 21075 21450 21092 36743 21824 21805 3346 11590 26544 1652 7756 13730 17593 5735 1654 21797 23563
4847 3091 452 7365 2306 194 2255 13682 1473 5421 1428 38645 6389 40711 3794 1421 2155 32207 5778 2514 37456 40949 6624 2466 5420 9609 10797 3092 197 2071 10326 529 35383 401 1555 4519 559 553 35001 35002 34998 35004 35000 35006 38562 35008 40195 9364 14288 18391 9962 296 11703 2249 40974 4629
4848 6998 10830 13290 6992 6997 6995 6994 6999 2971 13069 17794 15382 18061 35501 34158 8363 39365 23316 5065 13300 22302 13071 37641 18060 11050 19019 37306 13706 13705 247 40248 40269 40247 36370 39891 1169 16544 16452 16451 26165 30044 17137 16813 30045 19937 18329 19936 24394 39876 11006
4849 9270 15690 17492 9714 1744 853 2635 33557 14329 30766 15291 12747 9732 12865 23603 12831 9344 28648 33479 1061
4850 3830 4204
4851 837 976 13376 832 36998 33891 32628 36997 16398 18627 38880 34733 33402 20662 19789 16399 33401 7209
4852 1811 19163 16181 1264 36938 11723 23052 19199 16303 5237
4853 36907 23297 23697
4854 7531 119 23622 7595 13715 11081 118 10980 5999 31419 5990
4855 22623 22413 23933 22719
4856 9918 25852 19007
4857 39499 22643 35386 34020
4858 16428 12957 35559
4859 37046 34319 33200 26987 35773 27614 26997 27680 29478 27664 26988 38463 26995 27665 38461 26974 26981 34315 29490
4860 19125 16141 29585 16145 26655 39374
4861 37882 27739 27742 31324
4862 2956 11125 11124 155 17431 1811
4863 13 10644 3601 30126 16 49
4864 21287 34572 20823
4865 19606 18362 17486 37401 18384 26040 2754
4866 27963 23038 24065 22839 22171 34223 22555 22410 40911
4867 39989 33390 37678 21533 20730 22131 21133 26379 22454 23867 22589 37982 24419 28067 33267 24965 31312 23341 23350
4868 14551 14548 14529 4202
4869 3765 51 176 2472 17017 3040 15422 402 3769 3814 13127 1563 35597 15991 3076 1553 6928 529 6584 1795 6403 805 2319 9947 25844
4870 6323 3442 3499 6716 3501 7567 3506
4871 27469 34429 37676 28195 34250
4872 27064 29197 34166 25564 22602 25572 22883
4873 32039 7174 37156 19502 40030 32531
4874 26080 38808 39413 39278 26688
4875 29997 29983
4876 34878 26879
4877 23856 12190 23709 23533 27991 27588 25092 21934 40960 37356 40910 22662 29497 21858 25572 36882 23658
4878 3059 9544 11185
4879 10828 11877 14410
4880 20472 10057 35322 20449
4881 37989 27011 34312 40481 29455 26980 29475 35163 38461 32964
4882 14778 13877 10280 21198 6938 33839 5015 29242 33843
4883 1589 1594 38006 870 573 1843 3132 4350 3309 2525 19337 15340 4430 17316 14677 7042 14766 9661 9670 14765 12620 17285 1483 30874 17429 8835 1500 13458 18209 370 309 3420
4884 27758 1500 1546 4994 4327
4885 37738 275 4311 28142 4990 25949 39895
4886 1021 26425 34347 3564 37526 7335 34008 37327 15623 36378 15622 15173
4887 37228 5030 25803 718 5877 14087 4530 978 1165
4888 19473 2927 3010
4889 7357 12265 19604 19798
4890 17929 8243 11757
4891 39999 22 4194
4892 16670 4119 25810
4893 27623 24209 33584 25116 23517 34002 22919 35367 21535 29940 24705 22432 21536 24280 24311
4894 28958 2858 31251
4895 10826 13694
4896 4856 4826 4873 36491 2337 7818 3607 19359
4897 14219 4274 35060 261 244 4337
4898 17320 8906 4430 18490 7043 36682 9676
4899 10933 10749 10720 10583 21233 559 2203
4900 20215 3383 31519 17610 4063 13166 40829 6510 671
4901 38172 15474 18438
4902 30404 1128 6171 3658
4903 1906 3926 12335 19129 16023 7745 1099 4440 4430 36964 26738 2662 20553 14655 30975 978 9671 13538 2337
4904 21817 21790
4905 3994 14454 10595 15688 29704 4811 5512 35995 36217 2533 19791 15662
4906 1811 160 763 369 2261 39122 2427 19571
4907 16079 2773 2753 861 23548
4908 10982 111 11082 76 10979 8378 7496 7482 7596 3744 1217 1169 8105 16828 5979 35434 1461 7536 7538 16827
4909 23428 19527 22017
4910 2337 2525 3310 5172
4911 32131 34500 13806 165
4912 30910 19121 19652
4913 6392 3023 13130
4914 18395 4910 36054
4915 18154 2177 38366 2478
4916 1843 13953
4917 19669 25834 33755 22683 22684 33756 26293
4918 16933 3192 6038 14463
4919 2400 628 15271
4920 35841 28839 12529 20378 13488 13476 8546 15630 13691 1309 21558 8486
4921 1169 5305 128 1809 2536 9698 11227 9697 9707 31969 33952
4922 307 11682
4923 3950 2525 17430 1065 25361 2908 1076 2787 718 2340 25451 2341
4924 9494 33672 35038 4849 4848
4925 15753 26272 3607 16866 3154 6471 4079 1029 13444
4926 628 10813 247 266 274 39972
4927 13575 1509 1687 12632 19093
4928 28610 7620 1811
4929 6685 953 15068 2682 14451
4930 11112 20527 10375 7367 24774 26538 5423 559 9353 32381 8613 36970 2067 27435 24002 10347 13824 35224 4647 524 3732 6204 13327 8602 18638 13304 5635 12149 8729 13129 11380 7357 12547 3102 9637 13822 40048 37624 35761 20700 39335 16996
4931 22847 40581 3346
4932 28867 18016 20005
4933 19470 4118 2998 2664 20298 2525 2337
4934 22732 22727
4935 24184 21923 23028 22883 22912 23193 21696 24306 22667 28815 35496 34075 25294 23010 26958 40743 22530
4936 22635 29823 27068 26949 25732 29520 12188
4937 28687 38096 30244 37185 28222
4938 23294 28065 34711 24206 22278
4939 24046 26131 22834 22835
4940 22787 35215 12960 35044
4941 2232 6898 3638 8173 7086 7072
4942 10480 14875 10479 494 10525 24793 23366 9770 24849 10488 10476 10485 32265 6696 16813 19543 455 36720 26755 34974 21439 35745
4943 38273 26569 36579
4944 1022 9871 19765 10322 3575 21849 12519
4945 38526 27291 36486 31716 37249 39686 40751 21944 21536 23872 23685 31804
4946 2337 26239 10068 9127 38330 19861 32048 35429 39966
4947 8989 4322 36268 4272 11780 9511 51 30836 4294 559 3077 8299 3091 1811 2213 274 263 37644
4948 2222 5357 16799
4949 25711 30280 27196
4950 20579 28912 28905
4951 2202 11400 5553
4952 24674 34424 28271 25116 26660 26494 24708 36596
4953 17762 16324 28599 16325
4954 16723 30887 32580
4955 29862 26258 34258
4956 8542 9163 35974 15609 38008
4957 22640 24455
4958 8117 8116 13746 25610 13736 31929 4687 15838 8941 30127 10646 8910 17630 8011 15776 26318 25654 15806 13002
4959 19316 32004 20196
4960 19250 4946 25778 5030 18058 33921 4959 13257 12445 19026
4961 9639 2150 802 34942 2473 3092 559 40051 11161 4519 6630 38172 6126 9647 20247 25844 10365 36458 20699 11355 11359 8296
4962 9914 36907 29843 23715 18947 21590 39606 22597 25431 23109 25902
4963 2432 17772 12666 6290 160 20014 141
4964 1609 30389 14329 6081 8462
4965 23300 25124
4966 20453 31676 32692 11159 35675 23770 34334 4661
4967 7459 2990 14456 9988 920 3837
4968 18023 18597 32437 242 275 15488 17854 9793 2220 7319 7423 274 16894 4303 4304 18026
4969 155 51 32178 18800
4970 5250 5251 10060
4971 5226 2476 2337 16935 35504 13935 2635 36259 4779 594 160 15472
4972 5534 11400 13765 5459 10787 5532
4973 2874 38571 21268 2711 2782 7452 714 461 3945 14925 2843 2813 34806 30522 3419 2740 160 375
4974 33281 34677 641 17825 5110 28981 14529 642 19826 17852 17452
4975 11318 20770 11279 5447 5486 5502 13077 10172 22864 10187 11826 21109 11433 20242 26235 10089 10206 15552 11311 10286 6753 23292 10904 5470 10551 10923 11390 10586 10575 37958 11800 10208 11268 10093 10283 10284 2203 10165 10891 18826 15540
4976 25940 5450 10897 13651 40731 11237 5473 5530 5475 13657 2203 5479 1811 6038 20441 4416 7790 7791 9761 7927
4977 20501 38047 34955 34953
4978 12190 23878 25570 24590 17406 23225 23901 24444 21913 25088 32727
4979 22949 17406 22448 25108 23671 21181 20727
4980 13283 21670 6984
4981 8240 8012 8150 18947 20951 4202 27558
4982 21834 36743 3336 21788 11584 23585 31657 34819
4983 13712 10960 10969 10991 10965 26739 11937
4984 1772 28837 15684 23470 643 718 2525 3378
4985 2365 12695
4986 1755 2525 1538 9812 20182
4987 31070 21328 31073 34578
4988 3012 2218 30409
4989 16364 1843 602
4990 17825 5110 35462 36241 17545
4991 10683 5212 5536 11394 19755
4992 2286 3199 461 15511 1850 753 1822 1938 1937 7744 587 1821 4344 4086 2396 841 1045 1042 1870 1768 9432 870 4122 542 878 543 728 6459 2281 15217 604 473 586
4993 1242 1236 8249 160 2337 28927 17268 7996 20147 27463
4994 8220 27975 16213 19929 19927 19926 22105 19931 19924 1170 27978 26258
4995 7735 11132 12245 1986 15013
4996 15880 3107 300 6630 2461 38054 2152 8021 6589 3099 620 3739 8674 5004 15411 15895 4657
4997 20590 23161 9166
4998 18024 28348 32771 7319 283 51 39855
4999 4969 15598 32953 837 27937
5000 19759 10644 25 31806 11672 8117
5001 13606 12184 8890 20039 6972 1611 2067 18746 34942 2903 200 36081 3078 23497 28631 4565 38846 15366 13139 19986 33578 20248 7357 4629 28859 2342 1430 31028 8586 5775 8734 8575 8771 22337 37338 23734 35004 23484 17058 29231 38111 1606
5002 5277 3581 3572 1017 3569 5271 5272 5273 1020 3563 12523 3577 5280 5279 280 3297 1843
5003 28615 12991 17710 2662 3342 30495 2337
5004 21690 10004 21069 16996 2136 17056 4657 204 1436 1437 325 2474 23983 2067 2305 14840
5005 1123 10753 15960 1152 1674 9563
5006 194 559 31273
5007 6563 1293 1199 20854 2542 3776 128 6111
5008 15070 16573 16576 34749 16351 16558 866 16556 6668 1994 21978 15324 1974 1886 6689 28092 13192 3355 2366 20509 4034 3958 12713 1893 3386 1724 4097 1758 142 1762 1906 3980 1894 14731 15095 16338 8338 17479 16231 14635 8313 8314 25810 16346 12210 754 8129 17514 564 1925 4079 7335 12329 8483 8485 8456 1277 13504 1509 14802 32294 36916 15515 36848 4096 18525 22753 15739 20288 35428 7485 11558 1721 1720 7487 7486 11512 3939 11557 3886 1029 1083 951 950 6512 1082 9458 2915 1729 3139 4155 1930 18214 14705 2525 2493
5009 522 27698 30115 31227 3808 26750 12601 9526 25800 19739 511 19897 26179 26183 23365 4382 31917 15596 15598 15590 2851 720
5010 2863 19845 38013 34336 21379 18253 19429 17935 36427 25452 31255
5011 27195 38413 37522
5012 35735 18542 7365
5013 9795 34121 7702 7725 12091 7728 7920
5014 31248 11541 733 33328 1934 1712
5015 5047 6774 4736 15470 976 1165 13172 1538 837
5016 3696 3221 9494 10693 1189 39635 1127 22100
5017 9457 29679
5018 17784 2835 17758 17597 5109 16774 18246
5019 2246 39993 9895 27820 412 6029
5020 18000 14477 14014 16674
5021 6791 25406 33066 16761 4708 12406 3843 744 10424 28139 17425 1974
5022 4111 6751 2637 13433
5023 19316 32046 14018
5024 23846 20231 20237 6921 34888 20232
5025 7894 7459 3533 12953 4236 12958 14809 1726 27027 18280 2283 817 8330 874 17942 4187 3013 10607 5134 8454 15245 459 1841 3367 22753 3419 2525 28228
5026 16433 16422 16423 20335 37075
5027 27186 8838
5028 38389 22493 22610 22603 12190 32710
5029 39586 23027
5030 13858 4691 11
5031 27469 35484 25312
5032 28518 21145 21934
5033 22592 22278 24175
5034 23699 10879 21913 23154 23519
5035 36389 31823 27323 25277 26443 27159
5036 23234 27015 22719
5037 13036 13030 26113
5038 31958 9602 22739 39720 24179 31249 23108 22725 23297 38839 22724 29045
5039 40143 40141 40132 40131 40139 26830 35556 40128 36303 31140 26827 37332
5040 18885 7335 8830 32176 13648
5041 22552 22894 22443 10882
5042 29593 34586 16123 36912 30733 29624 16122
5043 17798 29218
5044 10835 9980 16395 39459 10702 160 1287 1121 14821 10099 9933 40651 1331 15542 4635 13873 37515 32529 36436 28001 25175 5714 3746 5462 10190 2203 40731 16401
5045 29995 30003 30160 37080 29994 34436 29978 30024 29988 30013 33301 32568 8972 8973 30043 30040 33659 34728 30025 29969 14313 30004 30759
5046 20499 6059 20496 18123 11730 15611
5047 29096 19653 26299 33821
5048 12626 1532 1550 5195 13386 1537 3012 35288 11730 16989
5049 7401 14057 14061 30574 20550 5923
5050 949 3385 15212 14771 14792 39324 1093 4227 964
5051 23592 23593 35790 34878 26882
5052 7111 26831 30434 15876 14358 642 2525 11554 3196 28425 16352 9271 628 7458 6486 9296 660 16554 160
5053 10694 2337
5054 18805 36996 718
5055 16225 40499 7312
5056 9721 12747 16238 25394 700 40714 15681
5057 5905 2444 32508 33956 1010 39887 28089 1020 27364
5058 29817 31963 34108 27108 23664 26378 22372 23902 23509 24059 22919
5059 83 7603 1459 9794
5060 23037 40699 23154 23397 27108
5061 208 18645 8641
5062 17692 26257 4924 35551 4926 12439 18308 36414 172 38042 28929 7329 36946
5063 6904 15936 18844 9692 39567 29647
5064 13531 6527 5784 3626 9493 9144 6886 14301 5756 1362 3672 1128 2427 6170 6184 40824 39625 39623 40863 6722 19596 381 40880 6180 6179 6181 6171 6172 6173 6174 6182 6175 6176 6178 6177 3655 1127 6728 29121 21055 4432 3540 1403 9169 160 7543 6564 9143
5065 169 908 24797 19874 490 37962 168 24796 24877 26749 20494 165 24842 902 10512 35446 901
5066 1428 5635 20325 11380 4215 24322 1790
5067 16739 9916 16723 32890 8859 22771 9918 20815 22764 40885 34534 27226 32579 40730 8861
5068 31384 32333 32398
5069 18525 3250 2969 28077 2956
5070 4336 17884 33971 39341 10814 36407 12730 35661
5071 12273 6981 32920 2526 6372 7393
5072 4327 1546 8554
5073 16656 36358 36359 12110 4821 17660 37870 2334
5074 559 31926 35379
5075 3267 34666 307 13809 27766
5076 31820 29172 10880 36799 26453 24072
5077 10595 736 543 35207 12748
5078 8822 2177 40085
5079 1811 3261 2971
5080 32411 628 33650 32655 19095 15104 3006 718 2635 3154
5081 505 10519 9052 35448 436 9683 5596
5082 14804 23836
5083 29176 25634 23663 22959 22579 26376
5084 35803 35801 26590 26592 13722 26595 16407 13782
5085 557 3105 801 1430 408 978 3221
5086 17185 6251 5338
5087 744 16104
5088 3292 1264 16836 1023
5089 5951 35148 14061
5090 23397 22196 21577 22578 9452 26633
5091 3409 251 20615 36781 24591 12626 17277 29444 14343 8481 17376 8468 31964
5092 25566 33862 40760 24296 26439 40910
5093 2112 12376 12378 2081 4518 11114 559 35455 31756 1021
5094 30522 17462 3418 642
5095 5880 1670 9257 2599 1259 3685 18264 16465 3501 40081 21306 1451 25413 1193 9042 1694 5694 1302 3456 5628 14266 1697 2541 1632 15442 4657 2886 529 38111 38151
5096 18708 7314 7315 7313
5097 28782 29773 23096 22433 38841 22623 21154 23022 29793 29792 24502 36066
5098 16834 1023 33819
5099 2337 1650 37496 26543
5100 32834 30014 29966 30009 30026 30022 31641 34434 28359
5101 1533 1314 1078 3840 32402 4107 3830 4205 12406
5102 11266 109 8355 5962
5103 21779 21467 25426 25423 11584 33641 18300 13727 21984
5104 6871 185 2421
5105 283 160 643 20329 26752 4294
5106 32361 18308 32362 575
5107 1538 4309 15208
5108 1541 7682 33031 9510 10684 28578 6360 15927 456 6088 30830 39364 33796 26745 32876 12081 28548 32090 35084 7993 30855 35085 13397 35983 37229 26746 20150 26744 36246 6765 6766 22253 34618 16378 13992 14978 20151 34620 34145 28983 8423 8519 4545 23361 33055 19613 33462 160 26753 20270 15972 541 9513 31874 17810 25483 17456
5109 9459 16295 7013 26202
5110 35042 1537
5111 593 467 13096
5112 643 17807 980 20486 16094
5113 6423 7971 19575
5114 16897 10817 9898
5115 20548 5952 8266
5116 40133 5740 2686 19843 33877
5117 26283 9181 29920
5118 26766 14888 5924 18372 5874 5913
5119 4117 2524 692 12330 8337 15537 12593
5120 991 20366 3348 9433 3329
5121 14525 25767 14580 33470 15399
5122 373 3471 3267 7347 9782 369 559 2337
5123 2673 283 1537 2337 10866 4805
5124 7703 7728 17939 17940 16180 34121 7706 7704 9814 17918 35972
5125 12584 13501 22052 628 821 4289 632 2493 5244 18063 40270 20430 5452 26013 2924 1965
5126 5948 14913 722 13451
5127 38447 38157
5128 6407 10689 25775 5237 18095
5129 13436 13205 642 19824 2824 7163 2813 23569 7281 32042 14357 19829 18581 3970 3195
5130 22464 22445 24058 25001 32721 22599 28209 23518 22561 29296 25116 22551
5131 10787 10924 10209 17754 3288 10929 21109
5132 18039 16949 17956 30827
5133 3292 141 2971 13275 1538 20395 9920 34428 8906 1023 4294 1537 837 2525 2337 1165 575 978 2432
5134 10644 8906 37297 37298 8150
5135 28717 32744 15184 32739 22916 23179 26621 22432
5136 2937 7260 18894 15106 1925 703 19632
5137 22380 17406 25280 23416 16153 17405
5138 27655 35177 23108 35480 25034 37176 28807 25288 22278
5139 26303 30479
5140 26469 29782
5141 31098 21950 23871 33002
5142 24631 22504 32543 27093 29331 28657 38952 27168
5143 39244 30629 38406
5144 23396 22440 31165 26382
5145 20677 19122 19001 21326 19112 19114 25856 19107
5146 7550 31069 27882 7546
5147 36323 34969 21878
5148 22435 22449 17406
5149 24363 34296 1169
5150 23610 32094 21700 22211 29371 21518 40556 28781 9593 31794 40903 25283
5151 31711 8906 23409
5152 34955 36667
5153 5456 13088 10547 18827 11244
5154 19839 641 5110
5155 27734 19219 32130
5156 8190 25884 25469
5157 28301 27476 32476
5158 300 1797 9937 25842 10801 5707 11173 200 3039 28228 4519 187 8592 201 3021 1209 2895
5159 8461 8467 33363
5160 978 23751 28842 18382
5161 29066 24452 21181
5162 35956 10694 19360 978 20553 6453 5870 28848 19606 35439 14091 5916 33956 14079 5899 5928 27897 14895 36897 5879 569 26218 40375
5163 11704 36458 33946 310 1473 7350 160 11166 2345 558 447 17903 774
5164 29947 35073 31221 1811 38905 2661 7672 3162 3160 23265 39023 7664 17501
5165 3352 9920 31566 20893 8906 4101 571 2365 8674 12966 2525
5166 3676 1122 8888
5167 160 9531
5168 22941 25725 23036 24070 21886 9452 26839 28212 24229 22372 22657
5169 10073 18179 10080 10062 18099 9776
5170 25656 11 15809 38100 18818 4202 10636 12837 9319 13021 8906 13038
5171 29292 29066 40715
5172 34738 20642 30148
5173 26451 22880 28593 22630
5174 18395 22866 7476 18050 35121 1506 33025 3572 5271 23126
5175 1804 14158 22080 1597 28376 2167 9692 39742 1220 21023 15442 6891 2232 3448 3523 18839 22081 10819 16467 6898 1240 184 9488
5176 3138 559 17838
5177 4890 4796 3154 9747 3173 1811 13996 9964 14981 32006 14636
5178 30431 22000 38448
5179 208 4545 17259 16372 14390 5587 13993
5180 27191 6033 1538 35244 2220 7572 7664 1811 7681 19165
5181 22059 21662 5814
5182 28663 29780 21933 26432 9584 23108 23697 33685 40717
5183 16623 3868 10047
5184 29082 14744 35309
5185 26947 25312 27475 31243 23219 40470 27723 27716 23226
5186 5582 9906 9909 9855 19099 40302 10967 6940 31188 837 822 835 17041 28399 4491
5187 24195 31552 30931 38986
5188 39562 31359 34976 26756 26755 39900 31353 18633 26764 36398 2538 15675 17757
5189 8320 2525 632
5190 32651 667 15035 11792 15688 30388
5191 2717 9181 17447 13544 27333 7255 7274 32043 7271
5192 21984 21461 24336
5193 8554 5177 4342 3584 8388 1546 17735 15291 24591 1463 15731 37150 1537 7605 13349 6455 11924 3012 51 11942 20491 26263 20767 20492 34296 15977 1169 30045 16813 1168 978 980 11947 4207 29267 2337 2525 4900 155 16886 2493 4404 4401 9720 3899 4783 473 1910 2954 1870 1042 934 4037 1843 3141
5194 18322 13066 9778 22306 28374
5195 17745 281 4846 23449 31274 1537 51 7977
5196 27531 21536 17406 29837 28285 23902 23231
5197 1792 2099 2076 15900 6444 7977 34792 27699
5198 13162 600 3944
5199 18713 7313 12940
5200 16771 29399 31663 2858 9185 18253 38881 26041
5201 34820 39703 34953 37252 36558
5202 318 319 2318 2342 5397 2238 21023
5203 26868 28549 7873
5204 34945 4531 28849 27411
5205 14859 1843 673 35654
5206 3534 1021 23424 160 128
5207 30971 29545 8719
5208 978 9290 19835 2464 2319 34361 302 192 290 550 369 301 296 277 553 292 208 559 19910 23803 19885 23802 22102 19890 33233 19886 288 19621 30383 26566 30541 19958 13342 19887 33229 23808 12438 13720 4289 31883 10694 17137 1169
5209 15395 14535 34937 14581 32424 28480 26878
5210 19502 16040 19434
5211 160 718 28920
5212 17406 25667 17405 29836 40724
5213 21389 21385 21650 32549 8723
5214 21064 783 806 7384 1421 550 307 373 3092 18641
5215 5100 2693 642 51 32326 978 17822
5216 283 118 8105 13711 7522 7524 15287 8107 28574 1811
5217 31447 2604
5218 32107 9659 7052 14666 25474 3402 17526 17536 13771
5219 8573 13665 32333
5220 4667 10802 37941 6012
5221 2822 36017 26266 5104 19804 16764 5098
5222 17526 3407 40383 13770 20114 16290 32106 3399 3402 14677 7018
5223 8439 3810 39427 1685 23836 12621
5224 258 6081 3209 15565 39020 21393 26002 21394 21391 11886 5869 18367 27633 14928 6452 5935 14930 978 980 3212 51 10694 4430
5225 21938 27476 23886 21936
5226 21158 21620 23897 30555
5227 1025 21679 16054 25633
5228 25396 39843 30428
5229 32387 8149 37300
5230 13885 7417
5231 34397 22774 9920 26309 34721 19109 20813
5232 30776 8175 8723 20840 8095
5233 2624 2463 1112 216 2622 1695 28698 15291
5234 29716 28458
5235 14069 980 7446 14923
5236 35309 9519 8266
5237 27781 158 3192 11663 32550 32397
5238 14540 14529 9163 718 16989 5172
5239 9091 30058 6329 4536 9023 4477 8819
5240 34890 4910 5604 13226 12415 20365 14791 22869 13111 27684 7873 13426 17264
5241 4792 5056 4722 16655 35216 4873 12110 2337 1169 36109 19909 32347 34286 19677 19953 161 9770 10524 40783
5242 2553 6916 184 2610 11306
5243 2673 3261 1998 1999 36793 2018 15468 15134 7204 8368 2011 8968 13701 1629 832 835 837 19339 160
5244 38555 12369 32068
5245 2019 7204 29943 18283 837 2525 821 12843 664 26799 12885 12787 12888
5246 2950 6061 18721 27983 12419
5247 24555 25589 25588
5248 13957 19952 35420
5249 15028 36816 13997
5250 5624 3711 6300 1642 28409 3435 6367 441 1804 333 385 36367 4386 6303 34131 3668 9104 1337 35989 1347 9115 1212 8163 3621 28382 20021 33851 1292 37719 378 422 4483 6321 3480 12661 128 3664 1128 1127 6182 8952 6200
5251 5653 22066 6199 3682 3672 15388 3667 31607 6209 1407 11734 22074 3456 5678 6100 4484 35855 4450 1302 8217 1182 5628 6227 31376 2581 6235 1211 219 33283 18836 20000 2625 2174
5252 12855 9272 21970 2534 17890 824 1061
5253 468 696 20866 2391 862 14607 2273 15296 17517 11531 4045 6820 30593 160 2525
5254 9173 16839 27629 19160 25205 4417 4449 1406 14494 1672 5306 18153 2538 21307 26758 20153 4371 391 9144 425 3457 26877 14500 9157 4354 5848 2297 4499 327 3112 2161 2162 14936 39285 7561 3453 39600 383
5255 141 2635 33478 33280 37606 10596
5256 30670 27678 29462 26985
5257 9262 605 4081 1538 16219 13282 18044 13275 1609 2525 3890 882 9715 543 35204 16239 857 728 16365 710 3945 2639 3889 16343 11918 1731 706
5258 36017 17685 7643 2773 2659 2750 9187 2692 641 2141 546 9348
5259 26003 12113 8521 17712 158
5260 19621 1023
5261 26939 32265 455 23754 35745
5262 1998 1999 830 9236 9213 16929 9304 18630 5509 2021 1997 8367 5508 2000 9205 2007 26037 2006 16928 9306 1353 15050 17038 19785 19784 31412 9311 19337 15468 9307 836 19786 14971 824 29417 18333 18766 39368 29384 7333 7334 7930 26143 7332 30918 15488 32758 12963 34230 28057 2214 18896 23635
5263 32219 10324 8673 19061
5264 877 2525 5172
5265 24698 24706 32302 40927 24595 22496 22831 22635 38939 24116 24084 24141 22373 25106 23026 27599 22589 22591 22973 23014 25080 25269 35096
5266 7667 26734 7576 7672 3164 3155 11835 7592 7730 7669
5267 30017 30016 31627 30031
5268 939 953 18481 954 30358 39038 36021 33798
5269 488 489 12601 25800 24946 3808 27393 17243 5162 28581 978
5270 6423 7977
5271 39789 37848 39796 18467 12730 15281 2337 17168 23816 22866 33986 14637 32821 39449 24950 39834 17727 7649 14041 33676 26870 26579 26240 28562 28553 19496 8318 3868 4090 542 543 33559 15337 835
5272 28018 17232 9531
5273 16555 14789 21399 12257 21403 26740 2337 2525 8329 16603 7947 2405 3933 38865
5274 17704 15302 17702 24932 4859 4543 39369 36054 4888 29931 12199 14794 35217
5275 1502 16215 30387
5276 677 674 673 845 4074 7951 15656 19645 39036 19087 10871 7649
5277 4430 718 27731
5278 26252 17803 8170 19243
5279 2337 7989 17167
5280 14773 19549 970 1045 4783 744 12692 16353 585 12224 3315 11915 6042 7452 1933 2525 2337 1650 11584
5281 7645 7647 7646 15124 17662
5282 37304 16908 13288 827 2002 837 2908 16519 15922 546 2292 37337 12159 2132 8879 3022 1242 18957 2473 4622 4519 6934 6942 296 805 24952 1611 28339 1128
5283 1509 12618 15015 1283 6081 1500 251 5172 2525 2349 3240 4005 4074
5284 32761 6957 23626 13040 7318 11640 6958 11634
5285 5518 2018 1627 33667 4888 6765
5286 4657 4656 187 176
5287 13658 2432 10812 28091 11190
5288 2731 36978 7256 3126 20831 2702 29426 7281 32622 30683 2870 2701 9181 28720 14382 14883 5740 5090
5289 18466 12877 3263 3369 1965
5290 8036 3685 6870 227 39566 3683 3689 3664
5291 9678 14666 15722 25884
5292 26792 8313 1843
5293 33217 27035 26098
5294 10590 40429 9671
5295 22364 23508 24283
5296 39134 25000 22397 25286 23214 22875 23297
5297 35179 39136 12190 39806 24191 23902 36734 26083 22602
5298 23154 21128 27088 28282 28060 23309 8845
5299 35498 16135 16142 34587 21256
5300 9588 29023 21519 27305 29013
5301 39775 29290 30190 20732 27851 22133 33812 21158 21130 26832 27855 23618 20742 21577 20689 21139 21177 21166 21176 21540 34857 34843 28501 8849 22131 29750 20749
5302 17373 8389 17383 15878 4289
5303 23025 21909
5304 34078 38840 23232 40968 39421
5305 22739 37282 23933 27080 22277 35213 33577 38135 23106 32724 27922 34875 31346
5306 21573 21167 36131 40821
5307 24740 22980 23695 24485 24109 26433 25668 27036 24097
5308 22397 22933 24065 22831 22959 23731 24520 26852 23214
5309 2924 3875 3849 11553 2970 2961 9889 13021
5310 718 19527 19528 1538 9793
5311 5277 27337 16834 15147 10475
5312 24447 24671 22380 25572
5313 160 1004 5172
5314 14880 12600 24854 493 165 13963
5315 20594 21008 14681
5316 17310 21005 1537 14315 35997 5452 718 17277 13479 17391 7120 21062 5198
5317 27448 22553 22378 22603 22831 26492
5318 19777 13749 16893 17690
5319 36531 5923
5320 1828 13380 978 980 3615 16246 15133 15143
5321 1217 2504 2421 18969
5322 22406 23703 22459 26094 9602
5323 6826 1437 3108 2467 25844 3133
5324 28180 21934 22394 25349 31203 22663 25068 38097 22630 22562
5325 18903 11304 35520 10191 10782 11262
5326 3525 6324 14497 232 3524 1695 3508 127 3513 5319 13167 7072
5327 21462 27696 10499 32087 31228 19962 170 12604 21737 19370 24812 19934 15563
5328 7427 243 245 8988 8986 5438 18878 8985 15746 5439
5329 14297 19771 40325 14683 13749 14292 24926
5330 29959 30759 30007 31633 1165 30845 15470 2283 714 1813 733 37385 2282 989 1843 2942 2525 160 21047 30377 722 39461 13067 718 19727 31642 36103
5331 32751 27123 9506 9534 11991 9531 18853 5462 283 17754 5714 3746 9548 30958 4658 35522 23767 9550 11327 9405 25985 11352 9555 20450 9556
5332 24448 40766 27552 32235 23154 36780 24281 22981 25081 23517 21934 22380 28269 12186 30556 25572
5333 32626 828 8366 1356 15134 2510 8155 2315
5334 114 6007 34334
5335 2650 37526 17070
5336 13947 2096 2086 204 4523 3266 369 792 187 205 192 11688 2337 4171 13838 1685
5337 25701 21180 22657 28589
5338 707 27636 11496 870 1719 628
5339 1335 1690 7691
5340 32591 9541 30841
5341 30343 5335 7630 5329
5342 11129 926 26270 25357 14451
5343 31047 21099 40114 1650 642 31255 19292 11588
5344 11609 3322 37241 3118 3132 651 605 1798 600 4343 1082 992 1057 2961 958 15091 628 10010 1085
5345 3071 3021 16391 3739 51 1286 1537 5685 5689 722 559 2141 33527 2417 31363 3092 14297 12182 4519 8674 2362 2465 3268 410 6375 40912 6981 205 6808 199 2247 6641 198 6931 778 3736 8805 529 3792
5346 15230 15904 546 6412 1611 1473 2242 13130 12180 20125 3108 3769 2895 2474 22337 3092 25844 13627
5347 2662 28964 24016
5348 38934 24685 31345 23938 22898 40582 34109 24542 26629 22882 22893 27057
5349 6858 8494 5430
5350 19804 32534 35620
5351 2525 4059 1933
5352 13791 39656 2460 2887 15230
5353 2932 11086 37436 1271 13497 17159 19419 1483
5354 1355 837 12225 10046 39690 5172 9921 14447 2525 9920
5355 5237 3256 5256
5356 16084 28900 16088 24004
5357 12091 9790 12082 3240 20215 1104 965 11094 3366 991 40829 2970
5358 19164 7678 4543
5359 559 814
5360 11398 10118 40603
5361 31781 22831 26468
5362 21409 15126 19359
5363 37068 35423 25797 39563 23369 516 19880 19959 19869 19952 30488 13352 13345 13346 18365 5896 5162 40389 26559 23460 30491 34293 4238 23810 39641 15520 35646 19947
5364 14087 3261 12000
5365 37590 1545 11618 9570
5366 8337 733 1875 26274 34513
5367 34811 5219 11326 11965 7514 837
5368 11866 9814 12088 12092 16539 7322 38019 11639 3065 30770
5369 8719 8724 19536 21388
5370 9992 17068 15454
5371 12099 1663 2587 2453 1541 6889 1293 14157 2205 6885 2227 6048 1287 6047 1699 22043 1641 2673 7845 1352
5372 18550 31763 8604
5373 1483 12641 23822 21564
5374 16818 10957 8349
5375 35738 8968
5376 13084 23744 40603
5377 15963 15961 5827 5826 15962 6896 14267 9131 16445
5378 24949 12827 8520 24945
5379 3296 12042 12059
5380 5192 15899 6379
5381 9650 1473 3034 38562 309 558 35000 35001 35006 34998 35008 35004
5382 5944 39641 9656
5383 20814 37929 31238
5384 283 30522 3419
5385 1737 16572 1101 957
5386 18859 18674 5452 20431 25812 13256 15589
5387 5423 34652 14237 39040 3094 16981 14238 14165 8805 8587 8664 23736 6971 6961 5707 14263 37074 6947 12554 454 8787 453 8674 8692 8050 8679 8051 39149 8678 8054 8056 8055 8053 12282 20323 34047 13912 9291 13132 6379 27353 17005 6559 18757 8791 15418 18662 8630 23988 8698 12265 25843 402 19057 4570 15417 8796 481 7358 3056 12319 37625
5388 3133 778 8156 4519 5406 2136 3421 31368 1609 1500 1314 1279 30520 2220 559 329 194
5389 14557 23619 721
5390 302 805 208 16549
5391 28125 20855 7101 7973 283 3316 7758 11497 28427 2925 1906 40816 1897 571 2525 32330 40979
5392 28150 20384 20855 9853 31181 28123 20798 40979 5477 3757
5393 0 99 1456 16829
5394 3420 369 8283 15389
5395 10423 16020 14849
5396 17041 28399 36014 39444 32150 2908 16329 141 35378 16886 28092 14608 1895 8308 1027 12353 34243 953 954 34797 7942 681 1825 13443 31515 4006 24025 11556 33351 1843 33553 11148 8014 11509 2944 12987 12590 11545 151 12592 2493 4401 36528 35502 5562 1811 6037 580 653 3866 4116 8269 15312 17864 714 3323 15736 1826 25409 4003 18678 6751 1746 4111 628 15463 20210 1798 4186 3594 18006 877 468 3199 461 1816 12989 16032 3973 2936 4122 1842 865 40474 12006 3366 4139 882 1753 3859 1707 2284 4712 4709 870 654 11544 2929 155 976 7102 15344 837 3555 3128 2281 1910 13415 7402 14655 978 2525
5397 3152 16110 2662 2525
5398 14863 1894 1076 12825 1755 1880 2956 12889
5399 4792 16664 4829 4738 16877 6757 20482 4729 32948 7885 7882 8527 17408 12415 25533 19730 5604 7995 6783 19313 27454 4812 19732 17258 6483 10869 10868 13991 16378 17721 7994 17257 16388 29682
5400 28546 8969 18588 4545
5401 12062 15244
5402 3034 8586 828 835
5403 15867 18345 146 868 15132 11102
5404 31612 575 837 9306 718 20493 20524 2019
5405 701 10592 16117 9273
5406 23697 26122 24417
5407 28062 27482 21172
5408 27287 29222 23106 29220
5409 21913 24970 27215 29035 23867 22651 27218 38784 24287 33706 23902 36873 39923 25596 22652 22387 24252 37548 24275 34697 23196 23037 23180 12190 24180 23889 24223
5410 35577 23297 24992 25879 23697 26643
5411 22606 24717 34418 24301 21909 21948 26651 25682 24722 31798 21856 24560 24296 27197 30822 22918 39583
5412 22592 26691 33813 31319 34222 29886 29885 33781 26854 34637
5413 37632 32588 24526 31085 25918 17406 37361 36770 34720 26839 33759 33758 27208 28589 29327 24527 24548 28231 27114 31551 35724 24246 22386 38582 22418 22361 22392 22481 25535 21181 22977 38284 29539 23684 22719 28716 26623 27546 39584 23700 37356 9920 13038 10882 39705 35894 23663 40910 27649 26365
5414 23681 22578 25127
5415 22831 22615 34177 22554 22432 24426
5416 24744 29202 24447 22602 23397 12190 24230
5417 9233 835 822 34263
5418 37132 4202
5419 30435 14395 26227
5420 23154 28322 27489 27078 26465 24102
5421 29776 32234 28190 31159
5422 14585 37449 32417 14572 15395 14580
5423 3315 714 542 543 728 878 842 15996 31997 20199 15563 6044 13784 575 16767 30535 10330 33018 6074 3190 35550 15622 30392 15584 6034 3189 10804 10806 1609 978 11059 5546 5545 10805 6066 3187 39548 15627 15564 4327 37725
5424 7313 18243 3265 15978
5425 1904 1973 3849
5426 14781 21474
5427 12998 12648 27178
5428 5851 5896 17240 5166
5429 16133 29580 16019 37132
5430 4207 1843 12587 3615 7473 20549 19153
5431 9278 5111 9674 32107 3261 21953 978
5432 12186 24271 23509
5433 22140 23903
5434 30062 5641 14210 33634 14209 14143 5769 14213 14281 2526 20023
5435 34252 36784 32415
5436 13309 20389 9393 8829 33836 6971 17006 453 8645 6945 10399 15894 33837 458 12270 13128 11373 6974 12155 13157 12554 30765 23736 20275 24928 5423
5437 23134 37009 20929 19705
5438 14630 36169 37276
5439 3588 13566 4378 29706
5440 6673 5318 916 2525 642 2800 29152 36016 5120 17766 39658 19847 17788 2698 34971
5441 1221 16798 2448
5442 8154 12684 12200 14608 4781 4714 1751 30996 11753 2935
5443 21520 31349 31823
5444 20269 3749 8229 226 35234 2506 21049 39821 4509 20265 33028 3783 31844 31841
5445 16083 4676 16096 28888 16094
5446 17608 27609 35528 35648 9906 36589
5447 34587 33588 16158
5448 4443 19569 19597
5449 1023 12509 35872 3577
5450 21281 17519 4854 33548 21444
5451 440 3601 2525 3577 14255 5279 3765 4602 22 463 2272 12148 4782 3899 1795 34982 26907 12954 35083 1933 714 4294 4365 6540 468 465 22094 11719 4753 7725 1314 1021 14751 5112 1509 5340 6983 1492 14581 3189 5114 2786 12256 36411 1023 1277 1502 978 334 692 11675 642 2291 18384 6452 5195 1463 4946 1500 4994 10812 276 1493 1515 2337 160 1020 2656 1017 1758 934 3264 1762 6372 2750 2773 628 2740 289 26261 1010 1025 14421 9470 12519 9990 16054 1014 15144 13296 8264 19245 13294 14428 14423 7312 15614 37942 27971 10806 5946 8497 16983 32903 14802
5452 8140 19472 3243 24021 17991 3857 3352 3958 12713 11438 4176 30899 625 8138 13420 4140 17517 18687 8142 4044 13166 2390 15269 16571 15273 9344 15311 2917 10050
5453 28459 17197
5454 32646 35446 19368 491 24380 170 19975 19977 500 14873 14875 31971 13366 32358 35404 31614 13365 21733
5455 4532 3441 9023 9153 3529 3494 34133 9024 15202 9030 8181 8819 4388
5456 23769 28760 16206 18629 16830 10961 10969 10991 11963 8350 1215 7 5973 13712 16817 7506 11021 10951 10959 35119 22016 5717 30512 18463 3549 35661 18464 18628 10496 17176 8106 8357 16821 8359 11054 10986 7532 38855 123 11327
5457 2319 38955 21032 2363 27134 7505 22698 9882 13629
5458 29001 32533 5104 7155 7301
5459 835 3795 10227 17897
5460 24427 22553 29527 22438 23702 21858 22380
5461 14031 35634 13396 19736
5462 27189 33460 36092 30324
5463 6110 9163 23161
5464 5960 23795 1500 7120 5928 5909 27409 14932 14887 18377 14088
5465 8009 29366 29367 12256 21011 35677 21010 21009 29368 40870 1752 6850 3884 22248 6851 29423 5917 18001 7490 11764 14730 11788 13310 14925 15464 27028 2287 12575 3945 27020 11916 13435 14921 16584 23410 16103 598 5198 33701 34426 19383 39280 21536 26365 21516 22919 22317 22916 24171 32604 24497 24254 25604 25606 25605 34111 25577 26633 25634 34108 8849 19114 17579 6983 19007 136 37689 39701 26729 26731 37688 11675 11684 11683 23425 16051 1023 5285 39829 11725 1021 12525 11838 25849 36527 40794 138 12340 28710 26313 40392 20371 20372 20373 8906 4198 12954 12953
5466 1287 9766 165
5467 16202 16204 13867 10606 39146 3430 3419 543 3369 14449 1906
5468 17507 11564 11563 27830 10828 29572 575 9900
5469 16837 30648 5094 31874 9235 837 1264 3270 28081 978 30615 17180 3261
5470 21190 128 129 160 10805 35836 4213 243 18597 4294 6067 6423 13578 11901 17750 3221 978 1609
5471 7063 14642 19356
5472 5153 4485 3501 19595 1128
5473 8877 28385 3629 1229 6328 6329 2548 2440 4482 2489 3638 15394 2174
5474 11736 8214 1650
5475 16371 10871 1023 2337 16385 36635 5603
5476 10593 34041 20880 1066 3196 9715 3297 2525
5477 29068 9679 8193
5478 19456 36805 36655 19321 285
5479 908 909 167 24841 484 903 24825 1004 9759 19319 1811
5480 27687 18185 12115 3617 3607 7643 17685 12465 850 14640 4908 14638 5607 7852 17961 4891 4894 16958 39300 28967 19740 18182 5604 12531 14036 15298
5481 34038 2525 18781 4030
5482 15179 15186 17693 15187 17695 22346
5483 27053 25269 37381 22989 22664 29109 22595 27108 40619 33577 12190 40242 22416 23500 23518 19 15860
5484 27715 27717 29166 38843 30818 22471
5485 34584 29623 16122
5486 5128 21683 832 9206 1609 5172 141 2337 7907
5487 7779 4220 28235 34878 19007
5488 23344 25017 39287 27256 22875 24073 24894 38817
5489 40128 36511 40144 26830
5490 38512 33774 34284
5491 1538 3807 3535 24591 36423
5492 22348 19686 13956 9769 20758
5493 19290 18134 17328
5494 21943 12190 23214 24160 37551 23301 23225
5495 29514 43 24
5496 40796 8641 3057 2319
5497 35752 3419 575
5498 19669 34380 20808 31708 34382
5499 2525 2341 37733 28097 2337 15271
5500 23233 27035 24116 12186 23036 35178 30171 17405 22880 21924
5501 23509 24534 27218 27301 34695 24542 30316 22627 21536 22497 24225 17406 25044 22527 12190
5502 21458 3344 23553
5503 33553 1933 40435
5504 20240 36857
5505 4289 718 11852 35119 26043 20575
5506 28478 12095 18844 10692 10693 28373
5507 412 8156 9823
5508 19091 16315 16309
5509 25848 20240 36857 2373 3616
5510 2600 3219 6010 6020 1195
5511 14852 40576 3615
5512 5287 2650 2651 2652 11720 2654 11721 16045 2655 16046 2653 33428
5513 16453 15009
5514 16920 33399 9214 15754
5515 30470 4202 13001
5516 5408 29376 15413 11383 18664 2461 16482 1553 13323 2362 15907 2292 5421 30722 1611 2252 35008
5517 28840 30975 26219 21394
5518 28789 23297 40719 21886 37104 27308 37245 40592 9588 23884 27531
5519 19271 2635 37159 2220 30661
5520 4994 29937 594 6520
5521 3574 15098 9436 9469 1019 13295 20634 19046 21675 32445 18129 16052 2656 11719 10005 32029 5283 280 5279 32448 33341
5522 3076 6969 1611 8605 8070
5523 39069 9531 35516
5524 12175 7384 35013
5525 4030 38646 969 12784
5526 17167 21011 12255
5527 5652 324 805 2895 12375 189 14274 3301
5528 34750 7063 20116 7064
5529 30336 1356 18627 837 23374
5530 7171 17781 7165 26272
5531 3252 24599 8308 3250 10607 2525 559 1569 205 12182 3059 529 2146 549 14235 397 23734 1552 3133 1620 2902 2071 4519 2289 3770 187 1319 19398 12126 3472 329 200 2247 620 194 27344
5532 5202 1500 5430
5533 20363 2373 17145 29926 2949
5534 16373 25807 7807
5535 19363 14062 15115
5536 10689 29074 29648 30940 23814 36411 29212 35065 20626 28905 29084 20575 28736 39286 20572 30412 28912 39619 28917 28914 20579 32933 17798 40513 35695 28920
5537 35527 31601 32909 31268 13685 34568 5834 1806 13607 4635 7977 16979 30540 36691 24926 3490 5210 38558 5445 9862 14292 1128 1127 3637 19771
5538 39795 10711 10791 10582 5536
5539 33974 3643 21712 31497 14162 8279 9131 483 1666
5540 9776 32336 12000 25781 26010
5541 5110 2704 32135
5542 2540 14837 12420 5654 31452 16457 6894 4589 7682 1236 160 19350 543 842 17492 924 8383 19273 8840 12837 626 12839 2635 2972
5543 37629 39703 37252 32316 36667 34955 5905 34959
5544 17896 18334 16398
5545 35465 33926 13173 32628 16399 33919 1627 12798 35885 33401 13289 24026 36118 7209 9306
5546 29394 9235 20163 37448 6743 34366 20920 6744 28399 15753 16905 16906 9226 16400 33896 20663 33911 2019 5514 2351 33399
5547 822 832
5548 7666 11063 30941 3020 2976
5549 4341 5110 7148 7290
5550 17424 36716 12872 29912
5551 7523 10974 21296 13718 16207
5552 5087 5740 2870
5553 26122 36321 27537 17405
5554 11880 6028 17810
5555 17406 27569 10880 25052 35340 34284
5556 25335 21536 24573 12630
5557 15854 25763 18816
5558 25299 27720 29308
5559 11 15856 8013 15782 13270 32387 3591 8929
5560 23297 21577 22841 38448 37167 20082 17406 10879 25096 35853 21182 28060
5561 21693 23518 27584
5562 28069 21536 23872
5563 269 12429 34134 40777 26787 2525 2337 1609 1023
5564 26711 21920 35061 29725
5565 21120 40890 28500 20735 25135 31891 20689 21133 40723 21135 38758 21160 22131 21167 40821 27870 35811 21324 21176 36131 8849 32496 31301 32492
5566 23384 21133 38864 40388 26098 21118 26676 20728 21130 29293
5567 27406 5536 10900 10926 10947 10715
5568 25556 22931 22930 22929 26453 27299 34082 23711 24580 21909 24704 23154 23879 24291 27213 22610 31684 23028 26621 22893 27921 32565 23002 27581 24727 34784 34871 29536 33859 24442 24959 35724 24054 24567 22605 22955 35188 34185 26356 24043 25569 25565 25572 33219 25546 25587 25575 26377 24276 32506 26664 21172 38842 22880 22962 22877 32719 23890 34699 32889 10877 28461 23225 26437 27032 25088 23397 33316 24487 24254 33863 37636 38509 24993 22506 23396 21857 38317 35180 25097 35853 21182 25096 26477 24198 22952 9452 23234 39786 24048 21948 27204 10879 35809 21536 31058 37417 21905 22617 26673 22484 40960 24450 22473 26401 24305 21917 21918 40840 24035 23034 24441 25559 29035 34576 30556 30169 24230 24123
5569 22561 25708 21536 39378 37679 37004 12186 22380 23397 23699 22651 23717
5570 24306 24276 37548
5571 13951 7229 8243
5572 28234 26137 19383
5573 7668 3144 18606 12092 11866 7734
5574 16975 12040 39448 18040 12054 7620 39300 28476 23137 12033 14011
5575 7554 1325 18262 40379 6096 5350 2623 3697 31602 3735 18326
5576 36483 29346
5577 800 1790
5578 5883 1424 794 6207 206 1426 29889 20236 23467 18567 3192 16096 28888 25769
5579 25974 37930 32573 16008 14755
5580 10102 11303 9985 11301 11411 32416 11804 10129
5581 19478 17135 14116 27371 38956 27373 5921 5932 23796 5916 4529 14932 14071 14892 14062 14906 14908 14105 6513
5582 32325 34953 36665 37408 36690 36994
5583 13005 15813 21316
5584 25892 6124 23067 10081 20455 19233 32591 1165 718
5585 31669 722 12475 1500 1537 2220 160 559 39676 2895 24761 37130 6980 35001 34995 35004 34998 35008 309 39142 13142 12557
5586 25254 32077 38236
5587 37122 31743 38636 38635 33086 39029 40642 33111 39920 33119 20350
5588 21172 23542 32709 34076 40914
5589 1918 4710 2976
5590 26795 4818 7405
5591 17972 17955 14637 25504 25505 16880 924 19275 9316 21967 10031 34790 8339 23414
5592 15147 1017 16031 14414
5593 15486 16593 23575 2755 17766 9987 9673 7054 17322 5112
5594 14443 16649 29110 12879 36626
5595 3231 15112
5596 23108 29538
5597 10078 11159 35675
5598 19861 9200 14991
5599 22406 22536 25695 22364 23216 22839 24055 23097 38862 23896 23038 27084 22409 22578 24508 27033
5600 27966 24303 22432 25879 26351
5601 19479 6110 19522
5602 6512 10016 16611 2913 6685 1041
5603 28644 32443 3579 36116 284 40521 3565 34297 4645
5604 17761 7695 1811 643 29641 30592
5605 39538 25301 35150
5606 8275 1089 3001 2527
5607 24587 29520 33596 27076 22380 23397 21917 27296 27307 27108 22990 24070
5608 1169 10694
5609 1811 8266 9531 19739
5610 17032 20430 23058 25781
5611 21821 3336 21748 23564 28340 32523 18300 33637 21808 5732
5612 15035 3390 13404
5613 36784 3323 3322 35090 461
5614 32678 18228
5615 34454 2432 718
5616 2255 14517 3042 16528 20562 33966 1575 192 369 1831 302 316 290 1795 301 12503
5617 16996 14175 13323 805 23736 6372 8189 11381 14686 15230 8644 12266 9822 19602 9348
5618 16438 32186 20345 16428 12956 30155 30427
5619 13041 1538 7605
5620 17947 3192 160 2220
5621 21385 35066 8702
5622 3261 978 569 4529
5623 30163 33994 4289 35288 4191
5624 3409 722 12984 2923 2525 6737 17308 12841
5625 28355 15176 26262
5626 1159 2174 1632 1128 39621 1127 6184 6182 3655 220 30847 8258 3777 5676 2463 5628 5673 2471
5627 15033 20563 13287 36020 20526 5515 18332 837 2203 5553 40477
5628 18312 12468 17668 22022 39268 12778
5629 6077 37501 12653
5630 39557 23576 34090 19847
5631 28582 4208 11727 31354 978
5632 2525 1925
5633 980 17539 9659
5634 23313 36832 6530
5635 3607 5017 4803 12116 8537 4598 19358 19506 34253
5636 3607 4764 3617 4785 16849 3611 5041 4830 16867 4738 20149 5047 5051 5044
5637 34382 17573
5638 19102 19655 17575 23791 23173 34387 19100
5639 23383 20718 22829
5640 7793 23823 2883 642 23165
5641 21919 22629 40214
5642 23646 22190 23392 23390 21583 37879 22156 23112 21364 21627 37908 22219 22218 37912 30247
5643 26138 21873 4202 39836
5644 27451 36287 27010
5645 40176 31749 37061 39918 40465
5646 25710 22663 27968 36770
5647 15818 13733 26319
5648 23547 35729 2525 2056 19133
5649 32212 32325 30087 7342 36355
5650 27270 25111 23108
5651 36620 31731
5652 20140 13359 7572
5653 26696 32279 37885 26688
5654 23154 25561 21934 24277 12190
5655 21948 24405 27256 27262 23293 27993
5656 2327 2315 12177 18655 12172 32136 642 283 8782 3022 1552 14235 3034 17060 40179 40964 12281 3021 25210 40942 16545 4657 12265 549 33519 6624 2299 529 4519 37201 4622 32920 559
5657 8913 15445 3591
5658 24781 36371 8095
5659 12387 35282 37289
5660 19005 19007 22764 26303
5661 31432 3281 36048 13360
5662 4303 25946 32503 5340
5663 5089 642 559
5664 870 868 25370 630 2996 9924 752 7958 1843 10417 934 675 1858 32459 11106 917 13573 8153 4129 877 2355 628 6677 571 3958 40879 40829 16571 4180 3829 13450 3955 937 2664 11104 11109 2395 10608 871 880 15007 4111 6751 16579
5665 14583 32032 25766 32034
5666 2375 561 15110 6664 2525 3121 2941 22318
5667 26669 36962 29646 23676
5668 11050 26966 35622 718 5453
5669 18543 20851 34726 9843 31182
5670 22030 1811 7669 28599
5671 6037 1811 7669 28599 19094
5672 4684 8945 31929 15843 10626 15835
5673 5110 9180 13542 13539
5674 7417 13140 16892 10248 20024 442 20701 2464 16984
5675 1811 27629 2646
5676 700 16626 16640
5677 17642 26230 10629 16693 16688 43 15847
5678 32874 9964 6481 19644
5679 17431 155 2525 643 17807 34330 31555
5680 2363 283 20009 7209 6704
5681 8368 837
5682 653 14602 2787 15461 880 12334 4344 3893 14446 714 8332 7745 2790 16365 4005 703 1060 11766 9337 2789 9270
5683 15396 6024
5684 5100 28042 2750 2846
5685 8511 15730 1494 36368 8517 17082 1493 1496 17224
5686 7232 17825 5104 17313 32104
5687 23603 6674 40829 878 9723 16631 4164
5688 7120 1016 3805
5689 30592 16088 28887 35251 16095 16096 23374 30985 23375 25769 28900 643
5690 36709 9574 7775
5691 1897 31975 9296 946 3235 31449 15094 27461 6492 1095
5692 9418 570 27364 35534 14097 33945 5859 27420 5858 14104
5693 27454 17264 19507 40945
5694 12236 2052 1843 6038 16193 9749 12251
5695 7249 19560 19839 13544
5696 13667 5161 9563 1128 12663
5697 29078 40513 10689
5698 39641 1538 1609 19360 11908 23636 7332 7924
5699 21813 23559 21807 24339 28340 18575 36807
5700 13810 15726 19131 28533 12831 12862
5701 10378 12305 8992 1207 8641 2067 2246 28228
5702 16641 6760 4726 4872
5703 32331 28153 141 35378 34923 4907 4740 4545 5582 2363 281 9888 9892 9877 31001 27132
5704 23741 3094 160 14335 30059 36803
5705 718 12568 6471 17042 39150 1027 30241 2525 19215 14451
5706 13079 180
5707 17464 29864 16006 32574 18201 18202 33451
5708 36270 18710 7423 18023 5339 12932 4276 4990 23455 12600 19527 30770 26939 1169 12640 20086
5709 22329 6529 3400 5110
5710 8968 8966 31888 27783 7471 30143 17867 35928 6524 32412 32229 15239 9345 20901 155 16886 12906
5711 3617 3618 4792 4872 32405 12062 21006
5712 7115 16229 10463 9755 7735
5713 21957 15750 36089
5714 16585 4013 9334 3910 696 4134 14780 7261 32285 38800 11551 12587 991 1933 6849
5715 5123 16079 17827
5716 38197 35682 32051 33080 35302 35694 38984 32847 32839 21258 16173 16135 39374 34717 16141 37840 27908 16153 29604 29607 29591 29585
5717 36231 1808 31496 2558 14941 1644 6095 4532 6094 18837 4660 20154 6295
5718 30441 26325 22719 18947 31318
5719 35553 18520 16694 3601 37132 20951
5720 19107 18999 18998
5721 31504 25822 16140 26655 16143 29625
5722 506 19365 910 24872 10509 27628 1169 9764 22346 20765 18306 6047 1609 9514 23474 8266 13784 32354
5723 38756 28296 21536 38608 27524
5724 29048 24475 24474 20746 39831
5725 25141 30907 24918
5726 40894 16976 16975 16945 11840 4702 16964
5727 25294 21536
5728 17809 32504 31304 24419 27296 28811 24916 23030 21168 21548 40573 22195
5729 3011 10806 5546 20045 35550
5730 39471 17406 31286 38369
5731 22492 22649 22831 22623 22640 22413 27496 24590 23715 24968 22397 22919 25039 22416 31700 22592 17406 22719
5732 23297 26106
5733 22657 23397 23396 22578 40400
5734 20951 18056 40125 4202 17406 33320
5735 21377 19006 20532
5736 22831 24137 21536 28269
5737 23980 36896
5738 36896 22852 23976
5739 35606 17364 17096 23836
5740 17210 13273
5741 21368 27054 19653
5742 7417 15222 24781 6707
5743 13369 15187 17693
5744 3261 4430 6532
5745 22860 29709 18023
5746 35796 160 1242 8214 2605 15438 11736 456 1169 13963 23810 12439 32354 32361 32362 171 31970 33291 4926 35403 37423 26569 34099 39237 36554 35405 39238 39240 38273 39236 39239 33290 23808 26565 17814 34293 36699 33244 19948 26561 29626 40783 19947
5747 8160 3493 9877
5748 8861 1509 8509
5749 22218 24901 8849 27271 22201
5750 33577 25249 25059 24555
5751 20065 20512 2427 2630 1594 13662 34093 20529 11162 28393
5752 17054 18746 20029 24767 5636 4569 31581 18540 22708 39993 16479
5753 22530 24130 25696 31814 22918
5754 12272 21201 3135 15363 12300 13323 8601 4575 24771 22708 18540 12319 4566 9895 39149 6389 2551 9388 8607 35113 18570 4565 4570 40060 6950 8638 8727 30763 6980 3302 31926 13131 28631 4579 6204 10225
5755 31504 26657 38229 31341 29613 35306 29871 30734 16147 35498 29586 29591 39374 33081 16145 31342
5756 29994 31627 29989
5757 4930 11858 26030
5758 15813 10626
5759 26985 37827 36293 30670 27614 34321
5760 3965 3966 11772 12971 2938 8332 9345
5761 28317 32583 21406 14738 7455
5762 23752 23749 978 26040 13542 32622 29920 14364 32137
5763 16637 16639 32824 4821 16638 32823 37235 6756 34024 3617 5054 18561 4739
5764 4289 978 3292
5765 4747 35968 7471 37325
5766 19005 21371 19007
5767 37441 31406 5195 20615
5768 15852 15797 14395 8931
5769 20952 6818 8702
5770 722 30227 22745
5771 9639 1428 805 4634 12557 6415 8890
5772 37208 29457 38501 40320
5773 36707 1106 701 18828 37712 34596 12749 15068 16662 22782 2925 12831 37065 13181 21951 3195
5774 38978 32818 36126 15244 36127 20239
5775 37082 19781 40919 36011 20523 36827 22037 837 51 32177
5776 18343 2337 2665 2923 1104
5777 31721 20240 15244 36856 15259 25848 36857 25847 36126
5778 25886 30366
5779 19949 18534 493 164
5780 35208 9202 23816 30920 14035
5781 26110 35572 37747 27904 23926 24908 40686
5782 19109 26288 26310
5783 4545 17869 7993 12415 13990 35084 4542
5784 870 3955 1881 6738 3956 18214 14602 1820 4084 2965 27029 598 1925 3122 10612 10804 597 3905
5785 4687 48 8013 15771 12401 25664
5786 11719 15158 15145 6985 16067 26426 33540 15173
5787 18104 5237 33651 11723
5788 24329 32933 28734 10689
5789 35983 39364 7906 39834 5603 27785 30503
5790 6712 4598 12542 8286 9139 9070 10675
5791 4612 18436 38674
5792 22106 37961 22104 38278 30167
5793 12776 35654 30575 12746 36716 704
5794 11860 19643 4891 1538
5795 5645 796 779
5796 1741 873 20410 12881 24941 12778 4061 15029 1964 7949 3118 6677 4006 1897 696 680 1709 9471 3880 476 566 1076 1077 15267 1969 11763 2388 20878 600 2959 1993 1965 2525 15328 4906 15298 18185 4908 17264 2337 1064 40879 13437 1971 30801 15099 894 2530 12564 19748
5797 2242 1831 13674 4625 8612 2472 38055 330 34245 15903 13682 405
5798 21461 11584 33486 21743 40527 36260 23582 21464 18285 21466
5799 8303 35122 4828 4721 4851 4720 18558 6743 2019 38978 1356 34366 37448 2025 4719
5800 22804 18520 20338 16435
5801 3192 16961 32440 7209
5802 39757 22559 36089 33719
5803 36961 21536
5804 12368 32601
5805 16012 34253 10423 15479 17415 16014 26006
5806 306 189 8593 13187 14389 37932 32833 12922
5807 13183 4172 4082 3383 3830 3838
5808 978 980 12022 28612 12034
5809 23641 21132 23120 8849 25118 21865 23341 24894
5810 22719 23234 22406 25041
5811 36763 24529 23710 23895 40468 25233 25593 23712 39247 25595
5812 21856 24428 26852 33581 25240 22635 23715 22631 22524 22573 27095 22597 25242 22400
5813 8939 22224 7997
5814 21926 38662 22918 21920 29825 26340 27991 22966 22378 23671
5815 32216 32214 32316 20327 32322
5816 8844 27502 27086 17406 36388
5817 20951 15822 8908 8924 26230 20123 8133 7998 50 34151 29514 43 8013 18 13736 8912
5818 24912 21579
5819 38773 12374 32083 38827 13272
5820 34906 23789 20824 25834
5821 23212 24646 22579 22623 25679 25056 24209 25088 22728 22609
5822 27217 23293 22918
5823 22661 22796 23732 22993 39092
5824 16420 21419 12956
5825 19639 21411 21683 30871 16026 2337 19727
5826 37345 22157 22216 21630
5827 30917 17503 15155
5828 16157 16155 21259 32846 29612 29588 29596 33588 26656 33700 37171 33080 33079 8906 17644
5829 14994 35441 4854 16568 23758 2337 15295 32959
5830 24633 21913 24231 31798 21696 25292 24542 26474 34035 24508 34002 24130 24105 24273 40582 22966 24125 30690 35151 36186 38835 24442 22911 24529
5831 570 5957 978 3261
5832 40202 33782 15699
5833 17960 269 5438 267 270
5834 31357 2437 2438
5835 11891 978 1537 3261
5836 26401 28670 34373 38135 31067 37024 30306 31574 27080 17406 33731 24264
5837 36003 33719 16709 13021
5838 22834 17406 22435 25877 39103 23308
5839 7335 32180 27184 12511 11617 35702 35701
5840 978 3154 13987 7889
5841 21328 20819
5842 32501 15532 28738 39446 40948
5843 407 22798 2941 283 16986 1355
5844 14144 33634 25217 14215 14153 20260 4623 14194 5154
5845 7600 118 5983
5846 22900 22445 27484 26475 24639 29295 22592 31161 28187 25048 23225
5847 34293 19952 18514 32355 26553 22102 26181 642 35992 7024 5112 6530 6531 31673 40383 14677 14664 15909 5599 161 10524 21732 22268 165 24885 19697
5848 25079 21950 31946 25705 24068 24557 31939 27215 25086 28181
5849 37705 37707
5850 40289 35422 3595 35469
5851 21076 11585 21810 21771 11602 21979 18285 21838 11595 16108 11583 21746 11582 11598 11573 3338 21816 23566 21983 23560 26543
5852 30393 1609 4289
5853 837 36014 3191 1217 7533
5854 26062 22618 28069 22886 32757 24979 38661 10879 28461
5855 4182 34499 3593 674 17652 29715
5856 16617 2525 11102
5857 32155 26906
5858 17071 37960
5859 11897 14436 14428 29910 28642
5860 8913 19128 4700 22246
5861 17246 17811 7730 18771
5862 5250 25814 25781 22311 5452
5863 31411 29416 2013 2015 1357 15468 836 18333 29417 16909 16910 12176 13301 9304 7988 9307 19786 829 40077 7437 6958 32775 37946 33971 29385 39341
5864 8183 15605 14312 20982 8510 10694 11081
5865 192 8305
5866 1317 14727 9267
5867 31011 31010 26557 20897
5868 25248 25037 22413 25116 25052 22959 24102 25080 24590 27199 17406 39352 29497 21934 25236 22664 22894 22387
5869 37133 37612 31711
5870 1207 35908 8690 3070
5871 5452 3549 1515
5872 878 1027 957 19307
5873 3617 12110 32406 5047 4820 39307 16873 4738 5052 3607 16869 12122 2337 7457 642 2800 22328 4430 22329
5874 4661 9404 40310
5875 36942 34347 837 2019 15344
5876 10150 5536 13655 5534 5470 11255
5877 16252 3615 7473 37527
5878 39046 5340 4247 718 4294 141 654 7865 51 4271
5879 4738 20149 4729 4829 3617 5056 3618 4792 16640 6778 11527 14737 4785 3607 4818 40112 2372 2022 2006 837 1996 38092 714 3946
5880 11339 8206
5881 36665 36996 37630
5882 16315 19091 21727 19083 36382 5326
5883 1488 28621 17429 23822 28085 1500 3800 1511 7120 8404 13496 8429 17156 6082 3809 5691 27396 8411 1487 17326 15064 3810 14321 4361 38870 1683 1463
5884 31339 36621 3465 2904 5646 4607 2905 1443 1786 2093 2095 1787 1788 1789 1424 196 1425 5883 6650 545
5885 12499 12476 12485 5370 32000 12481 8441 12478 8442 2669 8388 27397 7335
5886 189 8614 15941 10140 28695 34777
5887 17798 20580 3725 31372 20625 28721
5888 28742 26845 26960
5889 16311 10968 16265
5890 34980 32155 3426
5891 1128 1126 5694 5628 3456 31498 1259 38537 1163
5892 28991 28548 13989 22866 34085 33020 32877 3152 29269 12914
5893 16987 3618 30981 39673 21436
5894 3260 30616 3279
5895 6011 39940 16232 1650
5896 8308 571 8315 20868 12004 14730 12006 12005 1857 2382 11532 1851 14597 1843 1983 1977 4036 2380 2969 3846 473 1910 20330 14596 2954 15029 13406 36592 1930 13456 13383 3373
5897 19645 13394 2786 4820 6760 3617 17226 4856 3607 4785
5898 16951 4891 16968 12067 33349 13250 12068
5899 35414 529 3739
5900 29382 1658 15065 13726 5734 3342
5901 8305 14324 4203 17422 1965 628 18701
5902 5536 10287 10931
5903 4964 23836 5452 10070 22015
5904 25354 1546
5905 628 13442 2117 2111 12722 14466 2319 1795 1107 20289 11473 8955 11870 7894 16025 8957 11472 8956 16551 4111 7494 1821 714 4055 3947 11140 464
5906 11709 3732 3192 19650 3615 559 22675 1553 13915 26012 16101 2467
5907 1361 16167 2633 7084 2228 8279 32774 32773 263 18220 25966 1242 3701 6111 26015 1452 34896 6251 1115 6343 2192 1143
5908 4051 15273 6850 2675 17517 611 2492 16575 1986 628 7745 3946 4099
5909 3925 953 37001 12443 15299 12031 6754 36718
5910 2207 128 19624 4490 160
5911 2809 32043 27333 7299
5912 30522 25762 20231
5913 10551 20786 10208 10734 20780
5914 21685 7874 14637 17719 12948 32833 4542 27460
5915 8710 8711 8095 642 18251 2687 33745
5916 4024 1755 29146 887
5917 15049 17464 18201
5918 18201 4914 22331 14755
5919 718 26010 11856
5920 18056 33701 26827 40869
5921 4829 38361 7476 32955 36469 38533 30360 16425 837 12463 3231 14735 36130 40172 17400 3607
5922 546 32455 3022 2337 7989 189 2466 559 529 3021 6619 2465 3108 3792 3097 160 283 805 2242 8593 1538 718 478 1128
5923 30493 2247 13150 5382 2099 4569 12182 8896
5924 5928 14477 2525
5925 1537 4934 28109 12018 5030 18180 718 1165
5926 37246 23297 35577 21520 29134 28823 23924 27286 25123 29838 27297
5927 628 1096 2525
5928 27973 21181 22553
5929 27299 34082 38947 24237 23310 33216 25308 22888 37356 17406 23715 22719 21181
5930 27271 37178
5931 30835 17628 19128 31735
5932 22474 29787 21858 25041
5933 24118 24996 24649 25252 30598 22529 23207 35369 29019 23213 22669 22539 22919 21516 25000 21922 27923 9920 30590 26651
5934 32467 12401 16703 27048 10645 12402 17643
5935 30478 20541 7548 19003 8847 30447 16145
5936 36029 25756 26710 37189 25182 10880 29796 12340 27168 40817 32602 17192 13073 5077 19676 39012 31681 24591 17834 28645 35889 22593 32716 36644 26064 23902 36950 30276 38380 39911 39865 24588 31680 4201 22594 24243 22303 3550 32594 5234 11043 36879 26665 27017 22191 38272 23649 23390 22187 29883 29826 14329 32457 35681 23524 20421 13071 33921 13300 29201 37281 37478 33858 38085 22598 26851 38086 21536 39418 38592 22410 40750 24176 17406 28707 27705 35591 29500 8348 3549 3548 4945 4946 5030
5937 31240 31708 20808
5938 24125 34072 29801 24643
5939 1537 2220 3221 30755 17750 32808 30756
5940 30153 32185 14812 32688 20355 35559 20336
5941 22571 22410 25774 27581 33575 32473 37587 33574 33564 28752 27931 31057 22592 26345 38209 22629 38204 28051
5942 36191 35491 29513 23544 40096
5943 23693 33649 9453
5944 12374 12368 28061 22602 27093 25189 22640
5945 24430 12188 22618 22413 22651 23542 22438 26069 24491 24965 29106 25041 22365 29495 17406
5946 21950 25116 21536
5947 24419 31390 28762 40686 23697
5948 22640 24611 23663
5949 27712 27721 27472 27470
5950 1782 206 11689 5415 6801 6423 19543
5951 36155 12391 14626 13272
5952 13863 2437 35669 2432 978 11883 31886 21842 17486 4529 40472 26774 5901 9417 5923 34814
5953 10241 559 18382 36583 14910 18359 4529 36532 5879 14071 14062 2446 36531 28595 37504
5954 23397 40776 26441 22378 27032 22413 24065 21154 25041 25879 38661 12190
5955 30240 27535 29781
5956 27523 34537 27505 31396 29342 24422
5957 31218 21913 21181 24508
5958 6706 33040 38539 20077 2673 22279 9870 33658
5959 26843 32313 40037
5960 9840 642 5099 19812 3758 7301 27130
5961 18122 23813
5962 23808 164 517 19968
5963 3419 7058 3154 6481 10866 7859
5964 27131 24358 2200 5211
5965 34941 1359 1641 1408
5966 1500 19226 19256 18096
5967 38800 576 19477
5968 30168 35849 32779 35185 4319 5438 7306 3064 4290 20806 18133 28057 25943 26787 36122 7439 261
5969 248 39972 29444 283 34672 24368 13613 5075 16000 718 28467 25787 1537 32175 4994 1500 5174
5970 11992 34607 35091 10966 141 17754
5971 10414 677 676 678 6509 26737 12978 34264 12111 3607 4785 12112 4873 3864 1866 33617 3239 15476
5972 4276 4303 4306 4334 26780
5973 772 300 782 3267 15191
5974 508 12606 507 170 12605 12603 24800 513 5340 34984 4663
5975 2806 7134 5740 7254 638
5976 8009 30835 4699 4680
5977 19167 16072 13361 26794 7422
5978 17406 28322 28067 27494 27108 24637 10885 26710
5979 1808 180 3432 4549 2181 4601 1294
5980 18056 18621 37195 14786 34835 23408 23981 18943
5981 32354 22114 37597 14903 569 21842 11883 5873 5928 33944 18361 4531 34814 5897 5923 19301
5982 11581 21093 1650 21436 37310 31658
5983 11881 456 32530 6106 6329 5698 219
5984 11062 23133 14057
5985 7446 6116 25966 8977 19994 6093 1597 4363 1134 9688 1666 3146
5986 3157 18594 7729 3144 7700 33042 17918 7767
5987 23016 24252 33859 21943 24590 22719 4994
5988 7633 23832 3196
5989 20935 34523 33032
5990 21308 7762 31352 39308 455
5991 32600 17206 5185 7120
5992 205 306 7358 1586 2136 1428 2635 23833
5993 36372 642 12843 32251 2635 12947 35207 14452
5994 22919 24079 26632 21903
5995 18375 5926 5930 14091 26772 27363
5996 1314 1284 32618 29933 838 3898 874 15737 625 602 924 1764 653 2281 31691 3359 1709 3329 870 2934 15695
5997 13591 24940 11920 12675 11847
5998 32649 35838 6504
5999 30712 8894 12265 1831 194 8828 2067 8587
6000 13922 7346 13709
6001 28622 14319 5366
6002 3349 462 3840 32402 1887 28975 32403 15491 3911 1798 15099 3309 4179 1815 1816 3985 3369 2952 10056 15311 35552 3555 1753 7941 13470 9440 4009 3907 3836 3872 4177 3943 2490 1984 4029 12534 30895 16349 12535 2395 3122 4096 16561 25362 2277 3372 3240 3390 11552 1029 3846 15130 15634 12658 15656 4776 585 1933 13419 16621 16353 4079 7894 2925 1763 15267 4024 20219 4107 1737 3877 3250 7957 20509 14605 26943 15254 18003 3592 10058 4183 34499 11789 35475 10415 37873 4180 4181 4182 20053 14611 3904 17680 16240 16239 3358 2410 3359 23410 4074 15655 4088 6043 6042 15292 2970 11557 12685 944 707 8253 4003 9270 9428 610 2396 35218 7487 4114 4018 3980 7942 2969 1076 12711 3386 11512 3951 17514 1730 9474 40816 15735 20051
6003 22078 21846 20775
6004 19413 17793 10465 23252
6005 11018 16818 11021 10989
6006 21684 13112 7741 30871
6007 1204 3798 39934 38275
6008 2363 13663 35524 22227 25418 7766 26025 5251 14729 18095 33361 23042 5258 23059 19180
6009 4978 4981 16978 25776 11934 23059 18094 5345 5226 5344 5228 5227 22305 18096 5250 5251
6010 12621 26727 13465
6011 28615 28616 7620 12039
6012 34984 4670 34332 9407 33848
6013 3155 7659 7725 7729 17811
6014 3039 2315
6015 10843 15544 10782 11260
6016 20557 31852 3562 33009
6017 9209 828 17516 31513 835 830 32636 911 16841 5515 7209 2000 20162 19788 976 837 17754 160 37561 19304 5172 36728 31275
6018 21172 26472 22522 32462 25592 26371 29512
6019 15035 22023 2525 160
6020 13275 1537 2220 3366 2525 13929 978
6021 5948 27691 5186
6022 35892 22422 35407 22365 22671 22562 27096 33581 22369 23914 22959 27890 33762 30236 25275 22402 29520 38947 37617 22623 40951 22531 22634 23517 17405 23728 33413 22380 21172
6023 25000 25773 27111 22660 25532 36864 39011 22437 21905 25337 35150 22396
6024 29935 26041 19500 15137
6025 17544 10590 9952 5113
6026 5024 17226 4758 4743 6480 4915 4796 21276 14989 4865 10864 10865 33988 17764 33338 5446 3543 35656 5244 3549 5223 11048 3544 6110 6109 2337 8537 19494
6027 17431 25977 17430 155 33553
6028 227 1122
6029 13988 4595 722
6030 14560 14574 14556 14541 14529 14537
6031 20168 3180 14522 3183 37509 3144 17776 29424
6032 17740 26529 2941
6033 5100 14374 20187
6034 15237 3833 1842 13180
6035 35667 22307 18066 13938 9479 718 10043
6036 10843 10742 13607 37958 18238 21265 28429 10575 10547 5447 10734 10931 10115 40523
6037 27055 4680 22251 13031 770 768 769 772 771
6038 36374 40855 40557
6039 30892 35475 11438 542 12851 14451 12791 1087 4037 12856 2635
6040 4890 14989 36742
6041 35487 29587 26654 16987 2337 16145
6042 18351 8323 473 6751 653 1824 12591 11796 893 18002 32275 718 18859 18855 9479 37033 1294 1863 4232 14614 16350 15758 3352 3124
6043 4430 3400 13411
6044 21014 323 176
6045 1430 34658 9851 529 16486
6046 10942 10930 10902 5524 18911 21034 18871 10204 10089 10102 11402 11403 27765 10761 13607 10222 10187 20775
6047 20038 17011 6929 3088 477 30881 1165 19703 3595 559 529 6589 2059 16988 7359 10378
6048 32668 13245
6049 23984 5359 20760 26164 17220
6050 8849 26064 22918 21948 40864
6051 38071 38397 9588
6052 39772 29821 26066 26693 28204 22589 31574 34875
6053 29142 24401 29141 26120 24039 26407 28819 25027 28817 23108 39687 23297 36908 29345 24981 36869 28796 9588
6054 3604 20951 2941 18818 17644
6055 2941 16684 27091
6056 38289 8906 25836 25833 19653
6057 23715 38896 40860 40739 40913 39541 40173
6058 13573 18209 39825 39419
6059 3591 35946
6060 247 266 246 9581 273 29712 4281 18126 32761 15617 39015 244 4321 37308 36791 26784 243 36043 5339 13703 20094 7306 4306 26787 13705 269 30397 32763 37730 3187 5546
6061 3137 307 2135 559
6062 8117 39569 36 40277 18 17630
6063 27794 8579 2067 28616
6064 30660 28126 9845 31194 28938 34793 24368 8222 28575 27131
6065 39862 628 19549
6066 25870 30468 30685 19104 30464 34386 30460 25150 16737 19007 34722
6067 22840 20747 21577 22211 40573 17484 23120
6068 1658 39683 36444 21741 21787 23553
6069 240 31654 7323 35515 7313
6070 1242 14529 559 25843
6071 6767 3611 10866
6072 23724 17406 32544 22406 23500 27041
6073 2337 3607 3617 20999 5588
6074 1811 9223
6075 1010 12103 12022
6076 1504 14825 11719 7338 38319 36101 12627 4994 8511
6077 17697 20762 174 173
6078 13359 29951 17761
6079 26219 5928 570 5950 5951 11833 40472 27363 5166 24362
6080 10583 6753 35278 33594 10729 10851 11814 40377 13942 10095 10735
6081 23185 35100 23026 36352 23225 22459
6082 247 40300 37308
6083 16662 23555 1169 24393 26929 5597 10497 23363 18514 5596 9764 51 2908 23947 32648 37606 18293 36977 20617 16672 12062 16635 30851 18047 934 674 1851 1850 1852 24602 32937 1106 2525 141 2337 2635 15684
6084 7971 31185 36844 9879 13630
6085 16178 33743 14393 16324 12239 17494 3173 29948 14523 34270 20140 3183 12243 18607 19621 1021 2971 1811 39119
6086 155 1828 20601 3217 2393
6087 22096 3685 1211 1128
6088 13114 28636 1628 9233 15753 12328 4542 7871 14637 13108 4888 2337 36258
6089 17406 25748 22454
6090 34447 22830 22470 31098 22440 22918 22839 22372 22386 28334
6091 15450 4680 20123
6092 22046 5777 8610 36349 33027 18663 18544 5575 16401 15201 10134
6093 3587 13721 33996
6094 24410 25023 30320 24070
6095 17406 28678 13021 22536
6096 33967 14071 36898 18358 5951 17243 27634 14062 4529 5929
6097 10799 8782 32211 6947 6029 8779 4519 8619 13915
6098 35546 31612 34502
6099 27828 8537 29283
6100 17314 15909
6101 23439 9886 14687 9891 31186 37491
6102 19388 3288 11022 3747 327 7579 160 33031 978 7542 28588 40801 25771 9567 1806 1333 1352
6103 1023 1009 33074 12258 283 7408 1609 9751 35550 31988 14417
6104 830 835 40062
6105 29111 1730 20211 28648 1047
6106 2974 7650 7643
6107 4589 36986 541 23749 27392
6108 7232 18113 7302 12976 21442
6109 13208 605 6856
6110 11119 13323 19602 29227
6111 31615 2940 7406
6112 18578 40030 17441 28984 18494 2773 38882 26040 26041 17845 9987 23578 38881 19147 33745 28043 2813 2843 2717 34776 2816 15874 14377 11859 29156
6113 23296 24510
6114 30440 23697 33772
6115 21933 37023 25240 22962 38084 23030 21176
6116 35407 38467 37636 24462 34836 31781 38508
6117 38653 38508 39925 25714 24528
6118 21856 22471 33834 23715 26711 21920
6119 22948 17406 34459
6120 34159 21536 26405
6121 30564 29182 30563 29181 29183 29189 36069 22653 22919 28688 26074 30210 17406 22187
6122 8117 3810 8548 3800 23428 8393
6123 9391 35924
6124 19109 30470
6125 37808 26114 26116
6126 31207 23646 22219 21627 29541 33590
6127 16742 30887 30573 9918
6128 28872 24061 37369 21909 21536 23233 25721 29508 23890 28245 28262 36763 25270 22457 36960 40367 23154 22606 34011 24049 25740 24129 26480 21922 37573 12190
6129 31775 34690 33082 34686
6130 29583 29613 30730 21259 19127 35490 38197 25825
6131 27927 27934 33569 21536 25126 40911 25037 31811 34724 22644 22630 25260 33579 32302 36963 25268
6132 30463 9914 7550
6133 32112 13022 36479
6134 23752 27410 559 11381 804 2499 13124 11358 8690 397 718 19541 12999 36383 8605 621
6135 23272 29444 1549
6136 37770 7427 263 273 270 269 274 7423 31561 242 20046 11607 4294 978 455
6137 39058 32601 34536
6138 4203 921 2525 160 2220
6139 19450 5457 16463 20783 1330 11801 16455 11320 17409 11321 5481 11805 18911 11450
6140 21914 29818 17405 30247
6141 21536 23294 12190 22731 23896 27015 23025
6142 32175 15225 6993
6143 20394 6659 33820 5362
6144 18577 9678 14653 36682
6145 12102 23138 8519
6146 1169 15205 7911 13349 2974 2018 32735
6147 2178 6328 184 2423 5697 8167 2470
6148 34649 9139 28387 24930 4582 8795 18649 35755 9395 12295 190 18669 30763 529 8725 39221 17017 15433 15432 1430 408 9374 8699 6624 8682 12305
6149 22921 27196 22990 23386
6150 26293 28068 8848
6151 29508 25721 31292
6152 37378 22641 21147 31168 25721 22502 29533 24079
6153 718 12730 17097 257 258 1526 12636 12639 17293 22858 17294 8463 5367 31869 12474 5437 17393 13362 17392 1513 7120 1509 12627 13550 17382 1504 36935 8494 19938
6154 37136 12356 12371
6155 21536 21181 21166 22322 28508 25381 8849 29505 20727 21577
6156 12680 643 160 2533
6157 2341 37732 21836 13729 39682 37734 3338 21450 23557
6158 7083 7073 4596 6180
6159 38032 30703 10880 27917
6160 25808 5601 13778
6161 5430 8447 1546
6162 654 1837 9332 3822 23084 1964 29661 5922
6163 4890 20110 32668
6164 9573 240 17644 8939
6165 3154 4407 25390 21951 861 20219 24947 12746 7452 16934 1821
6166 213 5704 6263 5074
6167 27364 32808 8095
6168 20751 27106 31943 17484 3414 17113 17276 18702 25241
6169 5926 5928 20314 21643
6170 20204 13503 13457
6171 7292 642 160
6172 17321 5111 9659 7070 25469
6173 15317 34301 19455 40611
6174 16006 30647 30415 17754 6423 3261
6175 30661 26800 22714 24947 12861 12854 30194 2944 34499 4186 1754 4183 25438 29915 543 842 25390 12858 12856 21967 1076 673 1843 4343 15110 15078 18895 18046 10874
6176 13188 8527 12031 21404 283
6177 825 826 34788 30982 6530
6178 10488 10485 14877 9770 5359 14873 10476 10486 10480 19895 493 7411 7753 171
6179 6924 27781 27780 40476 7533
6180 29112 11696 4033 473 36591
6181 51 2220 9793 34096 242 275 6956 23637 14507 20283 4294
6182 35208 37711 5034 32005 36247 4857 28317 7649 7455 32009 5027
6183 10198 10840
6184 19949 22088 7894 2337 30241 36495 7120 13491 3241 24843
6185 9163 6037 18674 7752 1811
6186 24923 518 504 26183 26181 18514 32263 32262 26182 10499 32087 6696 10519 1169 1168 26165 9882 38556 17742 9888
6187 2276 3263 1906 1076 19549 917 1962 7470 14853 31985 33328 33067 3615 14852 26006 21238 2284 6839 33064 16011 14857 33068
6188 7111 2525 18487
6189 1546 3805 12634 19356 14586 16220 14529 26878 29935 30522 3419 35028 34497 35027
6190 7708 12240 36219 25950 12092 10461 9805
6191 594 1843 3882 11786
6192 10025 2635 19091 7627 33483 141 5515
6193 10040 602 893 15765 8337
6194 7204 6057 832 1355 10875 17261 2336 23329 16846 13242 14014 8522 34152 4859 12947 16374
6195 12676 15580 32197
6196 12687 35996 954 26274 17042 15738 917 36784 21249 4713 2412 14852 13437 40829
6197 7301 17845 21379 27335
6198 3419 23723 34082
6199 22882 34576 30169 21912 21917 21927 36783 24518 29032 27047 22655 22529 30332 21909
6200 23723 25161 22669 28295 17406
6201 21176 31350 21139 27876 23041 37927 38293 17484
6202 9916 20815
6203 8912 30675 36417
6204 31658 21749 5727 35929
6205 24250 27659 30935 27490 25634 27642 22376 23858 34016 22719 24281 26375 22438 25312 37366 38209 22492 29800 24606 27556 30441 23218 22522 28233 22427 23938 28245 23894 24624 8486 24303 27094 21536 24136 22530 28270
6206 23610 20755 27870 9591
6207 9769 23813 18120
6208 2650 2651 11720
6209 25019 23297 24982 17405 28071
6210 38662 33003 25107
6211 30690 10879 27218
6212 8913 11 17614
6213 6389 1207 199 14297 13915 3736 208
6214 11402 11404 20771 10927 10938 10711 11812 5355 1122 18610 10576 14843 16463 10787 11818
6215 25062 26490 22397 21535 22632 30928 24533 24532 31094 25917
6216 17294 3810 14829 5172 9004 34804 34811 11350 10995 21657
6217 36098 14423 1811
6218 16145 35591 8906
6219 31611 2525 19621 1609
6220 3409 14309 4327
6221 22513 23677 28282 24296
6222 627 733 15660 3323 1933 917 593 571 3263 2525 155
6223 24040 22453 23505 22831
6224 7872 11521 3869
6225 25575 37379 26377 40555 23396 23541 23397
6226 1017 15166 280 1023 978 570 18372 5166 5958 23795 5960 13095 37401 5872 5928 17240
6227 1463 1549 17112 21004 6081
6228 29801 29799 34188 28023 40656 27044 22910 21497
6229 19383 21881
6230 24508 26064 34852 27651 23117
6231 23715 23510 25250 24506 17406
6232 37931 33828 35021 30382
6233 37629 34955 36993 36990 36667 39703 32316 37408
6234 40462 20919 7987 30866 4760
6235 29441 21461 21781 11595 18301 21453 1650 3972 3962 1754 10414 1843 1875
6236 8763 205 20891 6207 620 15785 10643 13 9422 22222 4701 4680
6237 25165 37258 26145
6238 3957 3132 2410 9447 692 3968
6239 51 2525 1843 642 17769 9426 15877 2659 2745 17781 2701 16704
6240 13798 16982 4570 18391 3732 1292 559 51 369 797 3022 3078 30788
6241 15465 2380 602 14767 2680 1882 4082 15763
6242 20693 9793 51 1023
6243 8847 19109 9914 32167 17573
6244 13212 2247 40332 8632 774 17007 529 2263 2251
6245 13923 8790 529 189 19403 9401 194 13130 2510 8611 51 34653 5191
6246 17161 15068 15102 8252 3144 9240 16839 1544 12196 17285 17834 4327 7572 18713 5546 7658 1811 160 7734 7768 14393 33743
6247 13015 26146 4684 13005 21489
6248 1811 35899 17526 18577 6749 7017
6249 2332 24787 12031 7869 33676 27788 33797 16335 14003
6250 28386 2629 39755 18277 2193 1211 22073 15442 226 4482 5297 3721 36516 4508 4512 20595 1805 1182 1302 31607 2548 40924 35238 2179 25204 1128 6184 6171 1127 1630 3775 235 3708 5612 2468 1238 179 2225 1647 1292 28380 6354 8948
6251 4201 34694 25822 13348 26594 39902 13269 33250 9454 22369 22523 38665 25532 37917 36733 24670 24427 25529 26078 22948 23902 22651 22500 22939 38207 26704 23117 32462 38287 24058 21154 24226 22961 25074 22278 22633
6252 35895 14572 32032 14583 14582 25768 34937 32034 17480
6253 11730 4191 8543 6450
6254 8418 1106 3607 12062
6255 35066 12522 23747 29705
6256 23762 837 14031 7646 7649 30559 35848 4202
6257 2635 13664 20587 1165 5601 2972 38020 35913 12834 18336
6258 7977 31193 31202 27140
6259 1794 6448 559 1821
6260 4416 11078 2525 15070 1879
6261 4545 7612 19510 13982
6262 677 23837 25480 30642
6263 24910 21130 23108 21626 39443 8849 21347 21546 21536 29317
6264 12474 8544 1277 5685 7335 29260 1509 5195 722 3008
6265 909 17025 167 905 901 24797 24847 170 12605 510 517 18538 5358 5359 22111 12439 33291 171 35405 39239 39237 4925 35404 34466 32358 37950 18307 26177 10495 1169 1811 7677 3164
6266 35190 33242 35898
6267 21306 6898 6875 19467 34777 15934 837 5582 1352
6268 32806 31508 30525 23135 22231
6269 2971 36369 6011 1537 54
6270 3070 2289 38111 2473
6271 14753 14755 15407
6272 4430 12199 12919 35292 2525 29392 33677 1733 31722 141 2337 19639 13115 2635 39645 27684 17853 10694 7989
6273 5423 8894 6070 5428 620 4625 15022 2921 2299 1730
6274 4037 8151 677 679 676 675 674 673 571 681 680 682 683 684 11535 3154
6275 1165 518 161 25626 8202
6276 907 36556 906 905 24800 170 24798 19370 512 12605 11190 35600 6652 6704
6277 20082 38448 22000 39310 38450
6278 6529 25882 35898
6279 34451 9837 11361 38677
6280 11206 10887 10759 10223
6281 978 13482 21243 5183 7120 5185 32600 17206 34633 16955 17100 5186 13507 13494 5188 34628 35628 13513 1524 13514 13515 12487 39886 19942 1529 2648 12477 13502 17141 1512 1514 29925 1517 37500 17283 13599 6455 51 1541 22041
6282 1959 17266
6283 17241 14114 2441 14910 32979 575 26256 27411 33968 14091
6284 23963 527 7353 2025 1628 6029 978
6285 21997 37002 40091
6286 33575 22317 38972 22501 24079 40971 24193
6287 22383 23881 36729
6288 19663 8941 19759 13038 13021 15807 15850 15823 3591 48 18 15781
6289 23298 28833 38838 40610 38282 36480 32164 23341
6290 27908 35304 32844 29610
6291 40400 13267 23902 4202
6292 23902 22502 23308 29846 27108
6293 3397 16107 3919 3121
6294 28793 34563 38408 27295 27298 27258 28807 35680
6295 26137 23592 34878
6296 17406 27036 28295 26705
6297 20336 20342 12957
6298 32869 37704 14617 23793
6299 40293 38991
6300 37629 32807 34823 34680 32319 34959 32214 34953 32212 34821 32326 36994
6301 5004 15022 10264 7358 3105 3767 529 16986 199 10297 1437 805 38679 10251 187 18899 480 2466 1553 2315 8155 3035 10261 2305 2362 4841 1436 205 5382 5009 307
6302 9988 3419 10603 37603 39146
6303 39037 21276 28136 4815 4813 4796 4814 7640 35208 141 17736 36814 2337 4220 17166 33278 38363
6304 38555 18990 36704
6305 24078 21181 29506 27199 23296 40367
6306 29318 29003 36482 33708
6307 26195 6663 15179 17691 34405 19704
6308 11655 31189 31184 21032
6309 3552 2971 6993 23070 4207 978 27633 11872 33945 36310 36623
6310 29993 29992 34730 30004 30041 30010 33659
6311 38167 14615 15710 37265 35281 32517
6312 16619 16618 18035 13374 1816 1843 15078 3952 9923 628 598 576 16598 2409 16562 31584 15266
6313 2877 5105 5753 19557 16252 17587 2635 23833 692 37001 20617 6657 6839 3991 35913 39150 29897 16649 12594 37639 19134 16659 37638 19748 16672 16633 25389 18828 29383
6314 4545 2368 4082 15217 6845 15472
6315 18427 14755 17476 18456 29249 718 35668 16919 32272 34157
6316 37467 29334
6317 37314 14319 7119 35622 17391 718
6318 22534 25324 29773 25877
6319 38984 33459 16140 26655 29595 34689
6320 22581 29520 28065 24428
6321 4864 17226 34085 18630 2025 832 4802
6322 24096 29785 30480 19003 19006 22685
6323 22722 27483 12190 24231 28244 25738 22413 24100 22497 31545 23182 21909 22453 37189 29180
6324 19084 31475 33478 33551 37591 6657 19131
6325 10758 5534 11435 10133
6326 33877 4340 32622 30683 21667
6327 38838 24264 29021 27299 25759 32815 25088 36485 21172 22527 25292
6328 33676 33675 8139
6329 7780 33349 1843 1906 20887 30530 30340
6330 1962 11482 714
6331 7427 29675 40499 4294 275 4277 26197 29674 1538 20281 13042 5439 5438 40058 11646 19717 245 243 244 4337 10814 7439 28576 18878 4300 4280 4254 242 11006 2220 4329 4328 15563 19614 4326 1544 38106 3800 160 1537 17391 17138 32457 1500
6332 16321 22018 160 141 12031
6333 13904 15894 11373
6334 1758 35839 821 8144 33600 22911 24211
6335 813 306 2088 8768 325 307 6087 24758 4655 4602 6927 18646 21039 9291 2189 15882 8614 39550 30101
6336 18307 13805 4289 30379 29999 31636 30031 30759
6337 1284 1513 1519 33452 722 7461
6338 36654 1172
6339 17746 10925 15558
6340 30379 19727 29999 30031
6341 17710 3251 38554 34063 29393 17810 2662 718 22020 20357 11974 11968 11970 18857 3012 40822 33875 978 34062 2337 12462 19097
6342 37995 22902 22397 26070 24141 12188 26468 24137 22907 24279 27652 24185 33562 34538 27997 28874 23874 31701 22563 22382 25095 29810 26495 25287 27506 21933 24177 24182 24535 38907 27725 24044 23017 24301 21860 34003 37685 25596 31081 38383
6343 18286 37070 21746 21461 35753 21107 40528 25420 21833 40114 21805 40527 11598
6344 1937 2350 5112 9165 35877 13040 15748 4294 1023 34346 1016 6984 12511 17194 5287 23601 9992 16030 16029 9469 21688 19045 14419
6345 34958 36665 5926 37408
6346 160 978 4531 32789 977 1236 18545 10303 11373 8802 16982 28350 8779 9382 8828 13874 35380 8593
6347 28117 7605 17689 26257 28929 17691
6348 19023 11039 19194 30986 18058 19193 19199
6349 30918 20828 25941 13930 7772 4311 18710 275 1538 7924
6350 15975 15180 19874
6351 2962 3846 4011 16043 12592 2493 3419 15281 14024 9441 18621 4900
6352 12178 38638 2252 11711 5407 30727 3070 14165 3025 2071
6353 1504 27188 18241 38368
6354 40081 33476 2599 1639 3735 30602 3538
6355 7664 7747 7661
6356 3059 1790 16393 205 3105 300 2474 3081 14259 3024 6603 6832 9904 8132 3591 8133 15796 13852 1589 18666
6357 1761 15493 4888
6358 4347 11770 9472 19749 12760 6482 20041 13965 13686 40234
6359 23620 17020 34936 32587 33625 14559 35896
6360 19342 2525 27769 2991 13955 32817 9264 628 7103 20215 2792
6361 32229 16408 22229
6362 859 1031 19275 8263
6363 19860 4294 1023 16060
6364 3946 722
6365 25019 38918 32788 24404
6366 13272 36144 40148 38926 40447
6367 7120 257 1509 9467 1513 8385 36344 15064 8477
6368 39441 39432 30684 27199
6369 22589 37982 34554 28067 34756 39989 40553 28747 26647 24965
6370 27280 40756 35566 27513
6371 36947 10880 23117 23200
6372 23712 25594 25523 23154 32965 22513 26710 24449 21536 23224 722 14062 6453 18384 978 17406 22929 34182 22278 40367 22952
6373 27216 22454 23397
6374 28809 23697
6375 31802 40855 40557 23406 7546 19121 20541
6376 978 30384 28119 13957
6377 2514 1254 4596 18969 1199 221 456 6044 1609 160
[truncated: 972,561 more chars]
