# Supplementary material for: Research on Recommendation Algorithm of Joint Light Graph Convolution Network and DropEdge
Source: Hindawi journal article supplement (doi:10.1155/2022/3843021), 2022-01-27
Supplement: f1 [file 3843021.f1.zip › 3843021.f1/gowalla-train.txt]

0 0 1 2 3 4 5 6 7 8 9 10 11 12 13 14 15 16 17 18 19 20 21 22 23 24 25 26 27 28 29 30 31 32 33 34 35 36 37 38 39 40 41 42 43 44 45 46 47 48 49 50 51 52 53 54 55 56 57 58 59 60 61 62 63 64 65 66 67 68 69 70 71 72 73 74 75 76 77 78 79 80 81 82 83 84 85 86 87 88 89 90 91 92 93 94 95 96 97 98 99 100 101 102 103 104 105 106 107 108 109 110 111 112 113 114 115 116 117 118 119 120 121 122 123 124 125 126
1 127 128 129 130 131 132 133 134 135 136 137 138 139 140 141 142 143 144 145 146 147 148 149 150 151 152 153 154 155 156 157 158 159 160 161 162 163 164 165 166 167 168 169 170 171 172 173 174 175
2 176 177 178 179 180 181 182 183 184 185 186 187 188 189 190 191 192 193 194 195 196 197 198 199 200 201 202 203 204 205 206 207 208 209 210 211 212 213 214 215 216 217 218 219 220 221 222 223 224 225 226 227 228 229 230 231 232 233 234 235 236 237 238 160 239 240 241 242 243 244 245 246 247 248 249 250 251 252 253 254 255 256 257 258
3 259 260 244 243 261 262 263 264 265 266 246 267 268 269 270 271 272 273 274 275 276
4 192 205 277 176 278 279 280 281 282 283 284 285 286 287 288 289
5 290 208 277 291 292 293 294 295 296 297 206 298 176 299 300 301 302 303 304 305 306 307 308 309 310 311 312 313 314 315 316 317 318 319 320 321 322 323 324 325 326 327 328 329 330 331 332 333 334 335 336 337 338 339 340 341 342 343 344 345 346 347 348 349 350 351 352 353 354 355 356 357 358 359 360 361 362 363 364 365 366 367 368 369 370 205 371 372 373 374 375 376 183 377 378 379 380 381 382 383 384 385 386 387 388 389 390 391 392 393 394 395 396 397 398 399 400 401 402 403 404 405 406 407 408 409 410 411 412 413 414 415 416 130 417 418 419 420 421 422 423 424 425 426 427 428 429 430 431 432 433 434 435 129 436 131 437 438 439 440 441 442 443 444 445 446 447 448 449 450 451 452 453 454 455 456 457 458 459 460 461 462 463 464 465 466 467 468 469 470 471 472 473 474 475 476 477 478 479 480 481 482 483 165 484 485 486 487 488 489 490 169 491 492 493 494 495 496 497 498 499 500 501 502 503 504 505 506 507 508 509 510 511 512 513 514 515 516 517 518 519 520 521 522 523 524 525 526 527 528 529 530 531 532 533 534 535 536 537 538 539 540 541 160 542 543 544 204 192 545 546 547 548 549 550 551 552 195 202 553
6 176 294 295 324 554 555 556 197 525 557 374 373 293 558 296 559 560 561 562 563 564 565 566 567 568 569 570
7 571 572 573 543 574 575 576 577 578 579 580 581 582 583 584 585 586 587 588 589 590 591 592 593 594 595 596 597 598 599 600 601 602 603 604 605 606 607 608 609 610 611 612 613 614 615 616 617 618
8 372 619 205 620 621 622 623 624 625 626 627 628 629 630 631 632 633 634 635 636 637 638 639 640 641 642 643 644 645 646 647 648 649 587 650 651 652 653 654 655 656 657 658 659 660 661 662 663 664 665 666 667 668 669 670 671 571 672 673 674 675 676 677 678 679 680 681 682 683 684 685 686 687 688 689 690 691 692 693 694 695 696 697 698 699 700 701 702 703 704 705 543 706 707 708 578 709 710 711 712 713 714 715 716 717 718 719 720 721 722 723 724 725 726 727 728 729 730 731 732 733 734 735 736 737 738 739 740 741 742 743 744 745 565 746 747 748 749 750 472 751 752 753 754 755 545 756 757 758 195 759 302 760 761 374 176 762 763 292 206 764 765 301 766 767 768 769 770 771 772 773 774 775 776 777 778 779 780 369 781 782 783 784 297 785 192 786 787 788 789 790 791 305 792 187 793 794 795 796 189 797 798 307 799 800 529 801 802 553 803 804 373 406 805 806 807 370 808 809 810 811 812 208 813 814 815 559 816 141 155 817 818 605 819 594 820 821 822 823 824 825 826 827 828 829 830 831 832 833 834 835 836 837 838 839 840 841 842 843 844 845 846 847 848 849 850 851 852 853 854 855 856 857 858 859 860 861 862 863 864 865 866 867 868 869 870 871 872 873 874 875 876 877 878 879 880 881 882 883 884 885 886 542 887 888 889 890 891 892 893 894
9 895 896 897 898 899 900 901 902 903 904 905 906 907 169 908 168 909 167 490 161 910 911 139 912 913 914 468 915 916 917 918 919 920 921 922 923 924 925 926 927 928 929 930 931 932 933 934 935 936 937 938 939 940 941 942 943 944 945 154 946 947 948 949 950 951 952 953 954 955 956 957 958 959 960 961 962 963 964 965 660 657 966 967 673 968 969 970 971 972 973 974 975 837 976 977 978 979 980 981 665 982 983 984 985 986 987 988 666 713 465 469 989 990 991 992 993 994 659 661 662 663 664 668 995 996 692 997 998 999 1000 1001 1002 155 1003 1004 1005 1006 1007 283 1008 1009 1010 1011 1012 1013 1014 1015 1016 1017 1018 1019 1020 1021 1022 1023 1024 1025 1026 1027 1028 656 1029 714 1030 1031 1032 1033 598 1034 1035 1036 730 1037 1038 1039 554 1040 630 1041 1042 1043 1044 1045 669 1046 1047 1048 1049 1050 1051 1052 1053 1054 888 1055 1056 1057 1058 1059 1060 1061 1062 1063 1064 1065 658 1066 1067 1068 691 1069 1070 838 1071 1072 1073 1074 1075 1076 1077 1078 1079 1080 1081 1082 1083 1084 1085 1086 1087 1088 1089 1090 1091 1092 1093 1094 1095 1096 1097 1098 1099 1100 853 1101 1102 1103 1104 1105 1106 1107 1108
10 176 208 619 205 374 1109 1110 1111 1112 1113 1114 1115 1116 1117 1118 1119 223 1120 1121 1122 1123 1124 1125 1126 1127 1128 1129 1130 1131 1132 1133 1134 1135 1136 1137 1138 1139 1140 1141 1142 179 1143 1144 1145 1146 1147 1148 1149 1150 237 1151 1152 1153 1154 1155 1156 1157 1158 1159 1160 1161 1162 1163 456 211 1164 1165 1166 1167 1168 1169 1170 1171 1172 1173 1174 1175 1176 1177 1178 178 1179 1180 1181 1182 1183 1184 1185 1186 1187 1188 1189 1190 1191 1192 1193 1194 1195 1196 1197 1198 1199 1200 1201 1202 1203 1204 1205 1206 1207 545 369 192 1208 206 1209 553 187 189 1210 1211 1212 1213 1214 1215 1216 1217 1218 1219 1220 1221 1222 1223 1224 1225 1226 1227 1228 1229 1230 1231 1232 1233 1234 1235 1236 1237 1238 1239 1240 1241 1242 1243 1244 1245 1246 1247 1248 1249 1250 1251 229 1252 1253 1254 1255 1256 1257 1258 1259 1260 1261 1262 1263 1264 1265 1266 1267 1268 1269 1270 1271 1272 1273 1274 1275 1276 1277 1278 1279 1280 1281 1282 1283 1284 1285 1286 980 978 1287 1288 1289 1290 1291 1292 1293 1294 180 1295 1296 1297 1298 1299 1300 1301 1302 1303 1304 1305 1306 1307 1308 1309 1310 1311 1312 1313 1314 1315 1316 283 1317 1318 1319 300 1320 805 1321 1322 1323 1324 1325 1326 1327 1328 1329 1330 1331 1332 1333
11 1334 365 342 364 388 389 1335 1336 376 1337 391 1338 341 1339 384 345 387 386 1340 1341 1342 1343 1344 423 1345 425 347 419 1346 420 418 416 385 339 1347 1348 1349 1350 1351 1352 1353 835 1354 1355 1356 1357 827 825 1358 824 829 1359 1360 1361 1362 1363 1364 1365 1366 1367 1368 1369 1370 1371 1372 1373 1374 1375 1376 1377 1378 1379 1380 1381 1382 1383 1384 1385 1386 1387 1388 1389 1390 1391 1392 378 343 1393 1394 1395 1396 1397 1398 1399 338 1400 1401 363 1402 1403 1404 1405 1406 1407 1408 1409 131 1410 482 337 1411 1412 1413 1414 1415 1416 1417 1418 1419 1420 545 1421 1422 316 1208 1423 1424 1425 302 1426 1427 1428 447 1429 801 1430 529 311 195 1431 1432 196 292 1433 1434 1435 1436 1437 1438 550 176 1439 1440 1441 1442 192 1443 1444 298 437 371 369 553 307 1445 1446 1447 1448 1449 1450 1451 1452 1453 129 1454 1455
12 192 93 1456 1457 52 1458 1459 1460 1461
13 187 192 320 321 319 316 293 294 372 205 374 371 176 1462 1463 481 302 1464 1465 1466 1467 1468 1469 1470 1471 1438 1472 1473 1474 1475 1476 1477 1478 1479 1480 1481 1482 1483 1484 1485 1486 1487 1488 1268 1489 1490 1491 1492 1314 1493 1284 1276 1494 1495 1496 1497 1498 1499 1500 1501 1277 1502 1503 1504 1278 1505 1506 1507 1508 1509 1510 1511 1512 1513 1514 1515 1516 1517 1518 1519 1520 1521 1522 1523 1524 258 1525 257 1526 1527 1528 256 1529 1530 1531 1532 1533 1534 1535 1536 1537 1538 1539 1540 1541 1542 1543 1544 1545 1546 1547 1548 1549 1550 1551 203 766 764 1320 1552 1553 1554 1555 1556 1557 450 1558 1559 1560 1561 1562 1563 1422 1564 1565 1566 1567 1568 1569 1570 1571 1572 1573 1574 1575 1576 1577 1578 1579 1580 1581 1582 1583 1584 189 208 1585 1586 1587 553 292 296 304 791 305 325 1588 200 1589 1590 1591 277 1592 536 1593 1594 1317 1595 1287 1147 1596 1597 1598 1599 1600 1601 1602 445 778 451 1603 1604 1605 1606 1607 1608 51 1609 160 529 1610 1611 197 1612 1613 1614 1615 1616 1617 1618 1619 1620 1621 1622 1623 722 1624
14 1625 822 1626 1627 1628 1629 1354 1630 1631 1199 1632 1633 1634 1109 1635 1318 1179 1636 1228 1227 1198 1637 1638 1639 1640 1641 422 419 421 426 385 386 1139 1642 1643 1644 1645 1646 1647 1648 1649 1650 1651 1652 1653 1654 1655 1656 1657 1658 1659 1660 1661 1662 1663 1664 1665 1194 1666 1667 1668 1669 1670 1671 1672 1673 1674 1675 1676 1677 1678 1679 1537 1680 1681 1509 1277 1504 1682 1683 1684 1685 1314 1686 1687 1236 1688 1689 1114 1690 1691 1186 1692 1693 1694 1417 1454 1695 1118 1696 1697 1698 1699 1182 1700 1701 1292 1702 1233 1703 1704 1197 1705
15 290 371 302 619 208 1706 292 296 304 323 624 616 1707 1708 1709 1710 917 1711 1712 989 1713 466 1714 1715 465 713 1716 1717 1718 1719 1720 1721 1722 1723 1724 1725 1726 1727 1728 1729 1730 1037 1731 887 1732 1733 1734 965 1735 1736 1737 1738 1739 1740 1741 673 1742 1743 1744 1745 1746 1747 1748 1749 730 1750 1751 1752 654 1753 1754 1755 1756 1757 699 1758 1759 1760 1761 1762 1763 707 1764 1765 1766 1067 1767 1768 865 1769 1770 1771 1772 1773 1774 837 1775 1776 545 1777 195 1778 1433 1779 1439 1780 1781 1782 1442 1783 1784 1785 196 1786 1787 1788 1789 805 189 293 1790 193 765 1791 1792 1793 369 1794 1424 301 792 187 1795 1796 1797 1798 1799 1800 1801 1802 1803 1804 1805 1806 1807 1192 1808 1809 1810 160 1811 1812 937 888 1813 1814 1815 1816 1817 1818 1819 605 1820 1821 714 1822 1823 1824 1825 572 571 1826 1827 1828 1829 1830 1437 1831 529 1832 1833 1834 192 1835 838 1836 679 1837 1838 1839 1840 1841 1842 674 676 678 680 681 682 683 684 685 686 1843 1844 687 688 695 1845 1846 1847 1848 1849 1850 1851 1852 1853 1854 1855 1856 1857 1858 1859 592 1860 675 1861 1862 991 1863 1864 1865 1866 870 1867 1868 628 1869 1870 1871 1872 1873 677 1874 1875
16 304 1876 1877 1878 1879 1880 917 1881 1829 1882 1883 1884 1885 1886 1076 1887 1888 1889 1890 1891 1892 1893 1894 1895 1896 1897 1898 1899 1900 1901 1902 1903 1904 1905 1906 1907 1908 1909 1910 1911 1912 1913 1914 732 1915 1916 1917 1918 586 1919 1920 1921 1922 1923 1924 1925 1926 1927 1928 1929 1930 744 1931 1932 746 916 1933 1934 1935 474 1936 989 1712 465 1713 1714 466 1715 991 733 714 713 1937 1938 475 1939 1940 1941 1942 1943 1944 1945 1946 846 1947 1948 612 608 1949 728 736 543 1950 878 857 1951 1952 1953 1954 1955 1956 1957 1958 1959 1711 1960 1961 1962 602 1963 1964 1965 1966 1967 1968 1969 1970 1971 566 1861 1972 1973 1974 1975 1976 1977 1840 1978 1979 1980 1981 1982 1983 1984 1985 1986 1042 1987 1988 1989 1990 1991 1992 542 1993 637 1994 1995 1996 1997 1629 832 1998 1999 2000 2001 2002 1628 2003 2004 2005 833 2006 2007 1627 2008 2009 2010 2011 2012 1354 2013 2014 1357 2015 2016 2017 829 827 825 2018 2019 2020 2021 2022 2023 2024 2025 2026 1626 2027 2028 735 2029 2030 1771 2031 2032 2033 2034 2035 2036 2037 2038 2039 702 2040 2041 2042 2043 2044 2045 2046 842 1758 2047 2048 2049 2050 2051 2052 2053 2054 2055 1353 2056 2057 559 307 1433 2058 2059 2060 2061 1552 2062 2063 2064 2065 2066 2067 2068 2069 2070 2071 528 2072 2073 2074 207 2075 192 551 550 2076 2077 2078 2079 2080 2081 2082 2083 2084 1443 2085 2086 2087 2088 2089 2090 2091 2092 2093 2094 1788 1789 1787 196 2095 1425 545 791 2096 1780 2097 2098 290 2099 2100 2101 2102 2103 2104 805 2105 2106 1420 2107 2108 2109 2110 619 2111 2112 2113 2114 2115 2116 296 2117 2118 1586 2119 2120 2121 2122 781 2123 2124 2125 208 1620 2126 2127 556 2128 2129 2130 2131 2132 2133 303 2134 292 2135 810 2136 2137 763 2138 2139 814 2140 2141 2142 2143 2144 2145 194 2146 2147 1591 2148 2149 2150 2151 188 2152 186 2153 802 2154 2155 2156 2157 2158 187 2159 2160
17 2161 2162 375 1804 2163 2164 2165 2166 1306 2167 2168 2169 2170 2171 2172
18 369 2173 2174 2175 211 2176 1625 227 226 2177 1111 2178 2179 2180 2181 2182 2183 2184 2185 2186 2187 328 2188 2189 2190 2191 2192 2193 2194 1638 2195 2196 2197 2198 2199 1195 2200 2201 2202 2203 2204 2205 1636 2206 2207 2208 2209 2210 1218 455 2211 2212 2213 2214 2215 2216 2217 2218 2219 2220 1352 2221 2222 2223 2224 2225 2226 2227 483 2228 2229 1666 2230 2231 2232 2233 2234 2235 2236 1350 2237
19 294 301 2238 1474 2239 311 295 1365 1370 1372 1378 1381 1380 1375 1368 1377 1388 1418 1366 1364 2240 2241 2242 537 342 364 384 313 1615 2243 2244 309 2245 1831 412 2246 440 553 1593 2247 2248 2249 2250 2251 408 2252 525 480 2253 546 2254 2255 2256 2257 2258 2259 388 339 385 2260 378 416 336 2261 2262 299 2263 2264 2265 447 2266 2267 2268 2269 2270 2271 2272 197 1962 476 2273 2274 2275 1910 2276 1042 2277 1870 1762 2278 2279 2280 2281 2282 571 2283 593 2284 2285 710 713 2286 1938 475 989 1929 2287 466 917 916 2288 2289 2290 2291 2292 2293 2294 2295 346 1292 1183 2296 363 2297 129 2298 2299 2300 176 1622 2301 547 2302 189 195 778 779 202 1795 2303 2304 2305 293 792 2306 2307 2308 2309 2310 2311 2312 2313 2314 2315 2316 2317 2318 2319 2320 2321 2322 318 2323 2324 2325 2146 2326 772 1436 479 2327 187 558 2328 2329 2330 2331 2332 2333 2334 2335 2336 2337 2338 2339 2340 2341 160 1478 2342 2343 194 2344 2345 2346 2347 620 437
20 371 374 295 302 619 277 2348 2349 2350 837 2351 2352 2353 155 592 2354 1855 2355 1836 2356 2357 559 1797 192 2358 1777 369 195 2359 189 293 205 1790 1791 1789 1586 206 2360 307 2361 2258 2263 805 552 306 208 2362 806 807 397 2363 2364 2365 2366 2367 2337 2368 2369 1757 2370 571 2371 2372 2373 2374 744 1969 2375 2376 1812 2377 2378 1853 1080 2379 2380 1753 2381 2382 2383 1970 1946 2384 2044 2385 2386 2387 2388 2389 2390 2391 2392 2393 1820 1830 2394 699 1818 2395 2396 839 1823 2397 2398 1973 2399 1096 2036 2400 2401 1717 2402 2403 1105 2404 2405 2406 2407 870 2408 602 1762 2278 1829 2409 564 991 990 2279 2410 2411 2412 2413 2414 1739 628 2415
21 295 2416 2417 2418 129 203 2249 2419 2420 2421 2422 1148 2423 2424 2425 2426 2427 2428 1120 2429 2430 2431 1360 1632 1252 2432 2433 2434 2435 2436 2437 2438 2439 1199 2440 1230 2441 2442 2443 2444 2445 2446 2447 2448 2449 2450 2451 2452 212 210 2453 2454 1302 1263 2455 2456 2457 2458 2459 451 2460 2461 131 2462 2463 1183 2464 2465 205 1591 2466 2324 410 2467 2468 2469 2470 1692 2471 2472 2473 1795 620 197 2474 2475 1225 2476 2477 2478 2479 184 1182 2480 2481 529 812 2482 206 187 401 548 208 2483 198 2484 1437 552 202 2097 2485 189 307 2071 1625 2486 1110 2487 2488 237 2489 2174 229 160 571 1755 2490 872 2491 2492 2493 1299 1143 2494 2495 1307 1231 2496 2497 2498 2499 2500 2501 2502 2503 128 216 2504 2505 2179 2506 2507 2508 2509 1325 1262
22 2510 315 314 318 316 317 319 320 321 189 770 2511 1369 1371 1370 1378 1381 1372 1380 1375 1390 2512 2513 2514 2515 2516 2517 2518 2507 2174 2519 2180 2520 2489 1644 2521 1251 2522 1636 2523
23 205 371 295 2524 2525 2337 2526 559 692 2527 2528 870 1034 2529 997 2530 2531 1072 598 2532 1628 832 2533 2366 2534
24 2535 1109 2536 1699 2537 1663 1249 1625 1451 2538 2539 1302 2421 2540 2541 2542 274 2543 2503 2544 2545 2546 2547 2548 2549 1112 2550 1199 2551 2552 1212 2553 1252 2554 2555 2556 2557 1307 2558 2559 227 2560 2561 2562 2418 2563 2564 2565 1450 559 2566 2567 447 2568 328 2569 2570 2571 1290 1692 2572 2573 2574 2575 2576 2577 179 2578 2579 2580 2581 1141 2582 2583 1646 2584 2585 2586 1325 2587 2588 2589 2590 2591 1195 1254 1674 2592 2593 1449 1189 2594 2595 2596 2597 2598 2599 184 2600 2174 2601 2602 2603 2604 2605 1191 211 237 2456 2606 2607 2608 1412 2609 2225 2610 2611 2612 2507 2613 1810 2614 2615 2616 2617 1453 2618 2619 1417 1364 1366 1377 1387 1383 1386 1385 1384 1388 1390 1375 1380 1371 1378 1381 1372 1368 1365 1369 1370 1258 2620 2621 2622 2623 1636 1228 1695 2624 2625 2626 2627 2628 2629 2457 2453 2454 2630 2185 2631 2632 2633 2634 2635 2636 2637 673 877 677 1855 2638 989 1938 744 2639 2640 2525 1295 2641 2642 2643 2508 1233 1262 2179 2644 2645 1500 2646 2647 2648 1509 2649 1493
25 205 1855 1845 1846 1857 1853 1852 1850 1851 1848 1847 1849 525 1023 2650 2651 1015 2652 2653 2654 2655 1017 2656 1551 2657 853 1799 2658 2019 653 642 2659 296 2660 1760 2276 675 2337 2661 2662 2663 2404 2664 2665 2666 1870 2667 722 2668 1283 1684 1685 1488 2669 2670 2671 2672 2635 2673 1421 553 2249 369 2674 199 2675 2676 1829 2677 2678 2679 2680 141 1811 2681 2682 1965
26 292 291 553 296 294 295 293 372 374 205 176 187 2683 2684 2685 2659 2686 2687 2688 2689 2690 2691 2692 2693 2694 2695 2696 2697 2698 2699 2700 2701 2702 2703 2704 2705 2706 2707 2708 2709 2710 2711 2712 2713 2714 2715 2716 2717 2718 2719 2720 2721 2722 2723 2724 2725 2726 2727 2728 2729 2730 2731 2732 2733 2734 2735 2736 2737 2738 2739 2740 2741 2742 2743 2744 2745 2746 2747 2748 2749 2750 2751 2752 2753 2754 2755 2756 2757 2758 2759 2760 2761 2762 2763 2764 2765 2766 2767 2768 2769 2770 2771 2772 2773 2774 2775 2776 2777 2778 2779 2780 2781 2782 2783 2784 2785 2786 2787 2788 2789 2790 2791 2792 2793 2794 2795 927 2796 2797 2798 923 2799 2800 2801 2802 2803 2804 2805 2806 2807 2808 2809 2810 2811 2812 2813 2814 2815 2816 2817 2818 2819 2820 2821 2822 2823 2824 2825 2826 2827 2828 2829 2830 2831 2832 2833 2834 2835 2836 2837 2838 2839 2840 2841 2842 2843 2844 2845 2846 2847 2848 2849 2850 2851 2852 2853 2854 2855 2856 2857 2858 2859 2860 2861 2862 2863 2864 2865 2866 2867 2868 2869 2870 2871 2872 2873 2874 2875 2876 2877 2878 2879 2880 2881 2882 2883 2884 2885 290 783 2137 303 277 2485 793 208 2886 2096 2125 2887 809 757 189 2888 796 196 1424 2889 2890 2891 2892 2893 2097 2894 620 298 2289 206 323 805 306 307 324 325 2895 314 315 317 318 316 2896 2897 304 370 2898 1433 1779 2899 305 2900 2901 2902 2903 776 778 779 192 2904 1784 2905 545 302 2906 1443 195 369 559 2907 141 2908 2909 2910 2911 2912 913 2913 985 912 2914 2915 2057 2056
27 374 205 294 295 189 2797 2916 1709 2917 692 2918 2919 655 628 2920 2921 2922 746 2923 2924 2925 2680 1104 2926 2927 997 2382 2928 605 2929 600 2930 722 2931 1685 2932 2933 2934 1732 466 2935 2936 2525 1811 2937 2938 1963 2939 2940 2337 2941 2942 2943 2944 2667 888 2945 2946 2947 2948 2949 2950 2951 2952 1760 2953 818 737 2954 2955 2956 2676 654 2396 817 2957 2958 2410 2959 1072 2960 2961 2962 2963 2964 2965 473
28 2797 2923 838 2966 992 2967 2968 2404 2969 2970 656 2971 2635 2972 2973 993 2974 941 2975 2050 2976 2977 2978 1960 2979 2405 2980 2981 1101 2982 2983 2984 988 1065 2985 2986 2916 2987 2988 2989 2990 2991 2992 2993 1062 1054 2994 937 2995 2996 938 2997 2998 2999 3000 1105 3001 3002 3003 1003 155 3004 973 972 1609 3005 3006 722 3007 3008 3009 3010 3011 3012 965 3013 2965 1064 1089 1104 692 1965 3014 2276 3015 932 2960 3016 3017 1053 3018
29 3019 3020 1005 1436 296 3021 447 3022 3023 1831 1795 3024 408 3025 3026 3027 2266 3028 2362 3029 1473 3030 3031 208 2484 374 772 769 765 2322 3032 3033 1610 3034 3035 3036 2347 2255 1422 3037 3038 3039 2417 2346 198 3040 192 788 2464 2127 3041 3042 307 3043 1601 806 3044 801 3045 3046 3047 440 3048 3049 2295 3050 3051 2310 2321 451 3052 2289 3053 2153 3054 3055 3056 3057 3058 3059 3060 283 2220 3061 3062 3063 3064 266 3065 3066 265 3067 3068 3069 3070 1556 2317 2148 3071 2461 160 2976 3072 3073 3074 3075 3076 3077 3078 802 3079 623 3080 176 3081 310 557 3082 3083 3084 3085 3086 1832 3087 3088 3089 805 1617 197 3090 1562 2483 3091 3092 3093 3094 1569 3095 3096 3097 3098 3099 1593 1437 194 205 3100 1602 3101 2568 3102 3103 3104 3105 3106 3107 3108 3109 2067 537 559
30 372 619 3110 1292 3111 3112 3113 367 3114 3115
31 295 3116 3117 2382 566 3118 3119 3120 2956 991 744 997 580 821 3121 3122 3123 2379 729 3124 654 730 1755 2366 2773 3125 3126 2699 3127 642 3128 3129 1986 1798 3130 2281 1842 3131 2963 3132 559 2900 779 3133 292 794 3134 189 2362 209 3135 3136 192 792 814 369 3137 2319 3138 307 3139 2387 3140 3141 933 944 3142 2492
32 369 293 192 559 3143 3144 3145 3146 3147 3148 3149 3150 3151 3152 3153 3154 3155 3156 3157 3158 3159 3160 3161 3162 3163 3164 3165 3166 3167 3168 3169 3170 1811 3171 3172 1502 1537 3173 3174 3175 3176 3177 3178 3179 3180 3181 3182 3183
33 620 294 372 374 3184 3185 3186 3187 3188 3189 3190 1609 3191 3192 3193 571 3194 466 3195 3196 3197 468 3198 462 461 3199 3200 3201 467 3202 3203 3204 3205 3206 1002 1003 155 3004 3207 3208 3209 3210 3211 3212 3213 3214 978 3215 3216 3217 3218 3219 3220 1217 2405 2276 3221 3222 3223 3224 3225 3154 371 778 776 779 800 3226 790 1428 208 1593 189 205 3227 201 176 792 3228 559 3229 628 677 934 3230 3231 3232 3233 3234 3235 3236 3237 3238 3239 3240 3241 3141 3242 3243 3244 868 1076 3245 3246 3247 1933 3248 642 3249 3250 3251 3252 3253 3254 3255 3256 3257 3258 3259 3260 3261 3262 3263 2372 141 3264
34 192 208 3265 3266 302 369 3267 2111 307 3268 559 283 3269 3270 3271 3272 3273 3274 3275 3276 3277 3278 3279 3280 3281 3282 3283 3256 3284 3285 3286 3287 3288 3289 3290 3291 3292 1811 562 3293 628 3294 3295 165
35 917 1930 600 3296 2914 1939 1933 3206 3297 1841 3298 3299 559 545 2097 619 189 2113 3300 3301 775 805 3302 3303 192 3304 3305 3306 3307 3308 3309 3310 3311 628 714 3312 3313 3314 3315 3316 3317 3318 3319 3320 3321 2534 3322 3323 1920 3324 3325 2649 3326 3327 2414 3328 3329 3330 1909 3331 590 1038 2663 2962 2404 3332 3333 1650 3334 3335 3336 3337 3338 3339 3340 3341 3342 3343 3344 3345 3346 2365 3347 3348 1937 3349 468 3350 2664 3351 3352 1899 3353 616 3354 3355 3356 2397 1039 3357 1083 3358 3359 3360 3361 3154 3362 3363 3364 3365 3366 1096 668 3367 3368 3369 3370 3371 3372 957 3373 937 3374 564
36 3375 2797 2923 714 3376 692 3377 3378 3379 697 2964 945 3380 3234 3381 2937 3382 3383 3384 1875 585 3385 3386 3387 3388 3251 2922 607 2396 3389 3390 473 3391 3392 3393 3394 3395 3396 3397 3398
37 369 192 3399 3400 3401 3402 3403 3404 3405 3406 3407 3408 3409 3410 1513 3411 3412 3413 1285 3414 1504 3415 3416 3417 3418 2850 3419 3420 3421 1208 187 3422 1779 189 2900 2305 3096 3134 2362 209 307 814 559 3423 3424 3425 3426 3427 3428 3429 3430 2667 467 844 468 2938
38 187 170 502 3431 3432 3433 3434 3435 3436 3437 141 3438 3439 3440 3441 3442 3443 3444 3445 3446 3447 3448 3449 3450 3451 3452 1705 3453 3454 2298 3455 1302 3456 3457 3458 3459 3460 3461 1331 3462 545 1788 2081 293 199 3463 552 3464 3465 3466 3467 1433 369 2900 551 550 779 778 195 1792 1782 192 3468 1783 3469 621 782 208 3470 3471 3266 553 3472 792 3473 3474 3475 3476 3477 3478 3479 3480 3481 3482 3483 3484 3485 3486 1811 2163 375 3487 3488 3489 3490 3491 3492 3493 3494 3495 3496 3497 3498 1203 3499 3500 3501 3502 3503 3504 2773 3505 642 3506 3507 3508 3509 3510 3511 3512 3513 3514 3515 3516 3517 3518 3519 3520 2337 3521 3522 2602 1307 3523 3524 3525 3526 3527 3528 3529 1640
39 187 369 3530 3531 1072 3532 2798 3533 3534 3535 3536
40 553 296 2659 2749 2748 2745 2700 2808 2725 2750 2773 2839 2824 3537 3538 1174 3539 3540 335 1132 3541 3542 718 3543 3544 3545 3546 3547 3548 3549 3550 3551 3552 3553 3554 456 160 3555 3556 670 3557 3558 3559 3560 3561 461 3152 575 3562 3563 3564 3565 3566 3567 3568 3569 3570 3571 3572 2656 3573 3574 285 3575 3576 3577 3578 3579 3580 3581 3582 1014 3583 1500 3584 3585 3586 3587 3588 493 3589 161 3590 3591 3592 3593 3594 2924 283 3595 3596 3597 3598 1165 3599 3600 3601 3602 3603 3604 3605
41 3606 3607 3608 3609 3610 3611 3612 3613 3614 3615 3616 3617 3618
42 2542 3542 1156 2547 2546 3619 3620 3621 2548 1292 3622 3541 2522 3623 3624 3625 1630 2429 3626 3627 3628 3503 3432 3629 3630 1113 1183 3631 386 384 385 423 131 421 130 416 1399 346 3632 3633 2495 226 3634 2183 2560 3635 1130 3636 381 382 3637 3638 3639 3640 3641 3642 3643 2424 2537 3644 3645 3646 3647 3648 3649 3650 3651 3652 3653 3654 3655 3656 3657 3658 3659 3660 3661 3662 3663 3664 3665 3666 3667 3668 3669 3670 1229 3671 3672 3673 375 3674 3675 3676 3677 1111 3678 378 422 219 3679 3680 2626 3681 3682 3683 3684 3685 3686 3687 3688 1122 3689 3690 3691 1323 2549 3692 1189 3693 1163 1181 1238 3694 1325 3695 1120 223 3696 3697 3698 1194 3699 3700 1637 2622 1695 3701 3702 1633 129 3703 2463 3704 3705 3706 1212 1300 1191 3707 1261 2420 3708 1307 237 2612 3709 2627 1129 1134 1702 3710 1126 3711 2555 3712 1632 1225 3713 3714 3715 3716 1303 1228 2507 2193 3717 1263 1193 3718 1219 3719 1231 3720 3721
43 365 3722 3723 3724 3725 3726 3727 3623 2522 1259 1109 2488 2420 3728 2505 3729 3730 2606 1231 3731 525 296 319 3732 3134 1141 1261 3733 3734 3735 336 3736 3737 3738 3739 1601 3740 3741 3114 1437 2466 3742 2465 204 3105 1430 3743 3744 3745 3746 3747 1150 2495 2440 2180 3748 2627 184 2555 1191 3749 3750 185 2449 3751 237 3752 227 3753 179 3621 3754 3755 3756 3757 3758 3759 187 189 3760 3098 3761 3762 3763 3764 192 2239 1553 3765 277 290 553 208 2247 1831 1795 298 301 334 310 308 3766 3096 3767 198 552 202 3768 3769 369 783 805 2474 447 3770 792 2155 1573 3771 3772 2242 2360 799 2484 814 478 621 315 314 318 317 316 3773 212 3774 3775 1120 215 3776 3777 211 3778 1631 283 3779 3780 3781 3782 3783 217 1636 2478 1239 205 3784 3785 2071 546 3786 3787 3788 293 3106 3789 1195 3790 3791 3070 3792 3021 3793 3019 3077 3794 372 3795 3796 3797 3798 226 1302 2621 3633 2197 2496
44 3799 288 3800 3801 3586 1509 1511 3802 1507 3803 1506 3804 1508 1496 1546 3805 3806 3807 3808 3809 3810 3811 3812 1492 3813 3814 253 1500 3815 3816 3817 3818 3819 3583 3820 3821
45 3822 878 646 1876 1895 573 3823 1930 916 917 3824 2792 2797 587 580 3825 3826 655 571 842 1850 1852 3827 1853 1851 1848 1847 1708 3828 1846 1857 1845 1849 150 673 674 3829 2665 691 714 1758 888 3830 669 2963 3831 3832 3833 2415 3834 1842 3835 3836 3837 3838 3839 3840 3841 3842 605 1932 592 3843 3844 3845 561 3846 3847 1724 2969 2968 1721 1725 1720 1727 3848 2967 3849 707 1718 3850 1730 3851 3852 3853 3854 2412 3855 3237 3856 3857 3858 3352 3859 1079 3860 3861 3862 3863 3864 3865 3866 3867 1903 1891 978 637 696 3868 1927 594 3869 3870 1879 3871 3872 614 820 632 3873 3874 3875 3876 3877 2045 3878 2044 1946 3879 629 583 1913 2964 733 1713 1712 1037 616 1870 3880 2954 2032 702 474 1955 746 991 1714 1936 1937 1717 3881 3882 3883 3884 3885 3886 3887 1940 1941 3888 3889 3890 3891 3892 3893 2524 967 3894 615 3895 881 3896 3897 3898 3899 3900 1976 1975 1894 1945 3901 600 3902 1965 2959 3903 1986 3904 1985 3905 2410 2277 1042 1987 3906 3907 3908 870 1824 3909 3910 3911 3912 1818 3913 2398 1825 1710 624 3914 3915 3916 627 574 3917 3918 3919 2406 2922 3920 3921 3922 3923 3924 3925 3926 3363 3927 3928 1855 3929 3930 148 151 147 145 3931 672 149 3932 3933 3934 591 3935 3936 3937 3938 3939 944 992 3940 3941 3942 3943 3944 3945 475 1715 1938 465 1939 3946 1934 1935 3947 476 473 750 751 3948 472 3949 3950 1716 3951 3952 3953 3128 3954 2273 1910 3316 3955 1881 3956 3957 1964 1745 3958 1971 2042 1893 1892 2041 3959 3960 3313 1944 3961 3962 3963 1096 3964 3965 3966 3967 3314 2400 3968 3969 3970 3971 3972 3973 3974 3975 3976 3977 3386 3978 3979 1722 3980 468 463 3206 3981 3982 1925 1924 1923 3983 3132 3984 3985 1815 3986 3987 3988 3989 2928 3990 3991 3992 1812 2284 1765 3993 2356 1707 3994 1820 3995 3996 3997 3998 3999 4000 4001 4002 2379 4003 1746 1897 4004 4005 4006 4007 4008 4009 869 868 4010 4011 4012 4013 4014 4015 4016 4017 4018 4019 4020 1888 4021 1763 4022 4023 1887 4024 1732 742 4025 1726 887 2937 4026 3122 2383 2395 2957 4027 4028 4029 1990 1977 1885 1884 1905 4030 4031 4032 4033 4034 4035 4036 4037 715 4038 4039 4040 4041 4042 4043 4044 4045 4046 4047 1854 4048 2378 4049 4050 4051 4052 4053 690 4054 1752 4055 461 4056 4057 1734 4058 4059 612 4060 4061 879 618 880 4062 4063 4064 4065 4066 4067 4068 4069 1890 1900 4070 4071 1899 1898 4072 845 4073 4074 1901 1889 1902 4075 4076 4077 4078 4079 4080 4081 4082 4083 4084 606 2958 582 4085 4086 3328 1922 1928 839 3329 1877 1907 1908 4087 1991 1886 4088 154 1719 4089 4090 4091 4092 3375 4093 4094 1061 666 4095 4096 2917 2382 1984 4097 4098 4099 2640 4100 4101 4102 3359 4103 1762 2278 566 4104 1968 1969 699 4105 4106 1757 4107 3309 4108 4109 4110 4111 4112 1868 4113 4114 4115 1867 2637 4116 4117 994 4118 4119 4120 3139 1088 4121 734 4122 4123 4124 2925 4125 4126 4127 3355 4128 2287 4129 4130 4131 1798 4132 4133 4134 4135 1863 1031 4136 2031 2033 2030 2034 2029 2035 2037 2038 2036 4137 1772 4138 4139 3123 4140 4141 4142 607 4143 4144 4145 701 630 4146 4147 962 963 4148 4149 4150 4151 4152 4153 593 4154 1740 4155 4156 4157 4158 4159 4160 1741 1878 4161 2491 4162 4163 4164 4165 705 4166 4167 4168 4169 4170 854 4171 3130 4172 4173 3383 4174 4175 1709 4176 4177 4178 2399 4179 675 4180 4181 4182 4183 4184 4185 4186
46 2797 4187 3533 2923 4188 4189 1000 4190 4191 51 4192 988 4193 1105 3000 965 2664 1709 4174 1708 4178 1994 160 4194 4195 4196 4197 4198 4199 4200 4201 4202 1065 932 4203 4204 4205 991 4206 2365 2662 4207 4208 1165 2337 4209 4210 4211 2527 142 3392 718 4212 3264 4030 4213 274 4214 553 4215 369 4216 2679 1061 4217 543 4218 4219 2959 573 1609 4220 1032 2492 4221 4222 4223 821 722 4224 4225 4226 4227 2773 2692 2687 4228 1821 3395 4229 4230 4231 4232 2941 4233 4234 4235 1064 4236
47 4237 4238 4239 4240 2334 4241 4242 242 261 4243 4244 4245
48 259 4246 4247 4248 4249 4250 4251 4252 4253 2543 3067 4254 4255 4256 4257 4258 4259 4260 274 4261 4262 4211 4263 4264 4265 4266 4267 266 265 4268 262 4269 4270 4271 4272 4273 4274 4275 4276 4277 275 4278 4279 4280 4281 4282 4283 4284 4285 2220 4286 4287 1165 4288 899 4289 4290 4291 4292 4293 4294 4295 4296 4297 4298 4299 4300 4301 4302 4303 4304 4305 4306 4307 4308 4309 4310 4311 4312 4313 4314 4315 4316 4317 246 270 269 267 4318 4319 4320 4321 4322 4323 4324 4325 1546 1545 4326 4327 4328 4329 4330 4331 4332 4333 4334 4335 3063 4336 4337
49 4338 4339 4340 4341 2770 2753 2659 2700 2840 2857 2707 2699 2859 2833 2733 2759
50 2923 1072 630 3185 995 1084 2525 1509 4342 1284 4343 4344 692 3116 953 928 4345 2792 4346 986 4347 4348 4349 4350 2983 2939 4351 997 4352 779 777 3133 4353 790 202 189 2674 792
51 2164 211 1644 4354 365 346 4355 4356 4357 4358 2427 4359 1635 2252 4360 4361 4362 1537 4363 4364 3436 1204 3489 4365 4366 3447 2429 3539 4367 4368 444 4369 1292 4370 4371 1156 4372 1120 3641 3694 1189 4373 4374 4375 333 340 4376 482 337 4377 4378 4379 4380 4381 1169 4382 51 4383 1679 4384 2195 1638 4385 4386 390 4387 4388 4389 3452 4390 3457 2478 4391 229 4392 1365 1370 1372 1373 1371 1378 1369 1364 1368 1366 1376 1367 1375 1379 1382 1381 1380 4393 1374 1377 1418 1390 1389 1388 1387 1384 1385 1383 1386 4394 3778 4395 2172 4396 4397 4398 1287 4399 4400 4401 4402 4403 4404 4405 4406 2493 4407 4408 4409 3154 4111 4410 2637 4411 4412 4413 2049 3639 1119 4414 575 4415 1362 4416 4417 4418 4419 1811 1228 4420 4421 4422 4423 4424 4425 4426 4427
52 714 4428 2051 1937 4429 4430 4431 3533
53 4432 4433 1627 1628 4434 128 4435 4436 4437 4438 3484 4439 4440 4441 2850 2785 1287 2589 341 391 130 415 4442 327 414 389 390 3510 4443 4444 3449 4445 4446 4447 4448 4449 4450 4451 4452 3493 4453 545 2893 4454 4455 2889 4456 2482 4457 206 194 4458 195 4459 4460 1210 2897 4461 293 208 2483 198 2484 778 779 4462 2289 202 200 204 192 4463 1424 812 2096 4464 1793 619 4465 4466 4467 3114 2505 4468 4469 2469 4470 4471 4472 4473 3440 4474 1204 1203 1202 4475 4476 4477 3442 1242 1165 4478 4037 4479 680 1087 4480 679 677 675
54 160 4481 4482 4477 4483 3454 4484 3698 4485 4486 4487 4488 4489 4490 4491 4492 4493 3526 3499
55 4494 311 4495 4496 4497 206 2239 4498 408 1791 1554 4499 2505 2553 4500 2572 4501 4502 3632 3643 4503 4504 1124 180 1146 1322 384 416 386 3621 4388 1167 1131 415 4505 1413 1141 1195 2554 4506 4507 1632 1455 1204 4508 3631 3634 4509 3668 1252 226 4510 4511 1262 4512 4513 3112 1287 2504 4514 1304 4515 178 2499 3538 2641 2448 192 291 812 187 808 4516 4517 4518 368 1433 2482 548 1553 4519 195 202 552 2247 1785 1582 4520 1577 3474 4521 2097 1790 4522 793 4523 4524 815 3024 1421 205 371 4525 792 302 477 2319 2483 296 805 1831 4526 1586 1437 1573 529 4527 210 4528 4529 4530 4531 4532 4533 2514 1625 2624 2515 1189 1233 4534 2541 4535 4536 4537 176 2466 1835 3087 3077 1795 4538 2365 4539 4540 3990 3991 4541 2927 4542 4543 4544 4545 837 4546 4547 2178 3445 4548 4549 2633 215 4550 4551 4552 1295 1212
56 2659 2773 2843 2768 4553 4554 4555 4556 4557 4558 4559 4560 4561 4562 4563 4564 2722 3400
57 4565 4566 4567 4568 4569 4570 4571 4572 4573 4574 4575 4576 523 3101 4577 4578 2251 2263 4579 4580 4581 4582 4583 3732 4584
58 3722 3723 3724 3725 3726 3727 1714 3870 468 461 4585 411 1119 217 1292 4586 4587 4588 4589 3511 4590 4591 4592 2210 3528 4593 4594 2337 4595 4596 3562 4597 4598 4599 4600 4601 780 3098 4602 410 4603 545 4457 2097 2484 1831 176 4604 1433 4605 4606 4607 1782 2103 1783 2113 2093 207 208 3471 3266 4608 792 3473 3792 192 3475 369 307 802 1421 2101 1209 4609 557 757 814 4610 479 4611 2360 4612 4613 179 1262 1230 4614 4615 4616 4617 4618 1301 128 4619 4370 4620 2474 4621 4622 4623 809 810 2132 3043 4624 1320 3077 3072 296 2263 2258 4625 4626 4627 793 4628 2125 3421 405 216 2622 1695 2624 3487 1562 4629 4630 4631 3107 2067 2123 805 4632 3070 3047 2071 4633 4634 1321 4635 4636 3276 4637 4638 4639 310 4640 3071 4641 4642 1610 51 1023 4643 4644 4645 1022
59 3726 3722 3724 3727 200 4646 556 2123 3421 763 1437 3024 4647 1552 805 4648 2473 202 552 197 2362 206 2084 2465 2315 187 3792 814 4649 4650 4651 4652 4653 4654 4655 4656 4657 2115 3092
60 4658 4659 4660 4661 2513 4662 4663 4664 4665 4666 4667 4668 4669 4670 4671
61 4672 4673 4674 978 2432 2437 4675 3191 4676 4677 4678 4679
62 4680 4681 31 4682 4683 4684 4685 4686 4687 4688 4689 18 4690 4691 22 36 37 4692 4693 4694 4695 4696 4697 4698 4699 4700 4701
63 4702 4703 4704 3396 3264 3240 1755 466 2393 4705 2412 3855 3237 4706 3986 3987 1707 1820 2928 3995 3990 3991 3996 3999 4707 4000 3997 1830 2960 3998 4708 3992 4001 4709 4710 4711 4712 4713 4539 4714 4715 4716 4717 4718 4719 3609 3611 4720 4721 4722 4723 4724 4725 4726 4727 4728 4729 4730 4731 4732 4733 4734 4735 4736 4737 4738 4739 4740 4741 4742 4743 4744 4745 4746 4747 4748 4749 4750 4751 4752 4753 4754 4755 4756 4757 4758 4759 4760 4761 4762 4763 3616 4764 4765 4766 4767 4768 4769 4770 4771 4772 4495 4773 4774 4409 838 593 594 591 4775 4776 1735 4777 4778 2394 4779 4780 4781 2413 463 465 468 1067 917 1933 4782 1930 714 2396 691 870 4783 1870 3899 1910 1762 3854 4784 1069 1070 754 2525 4785 4786 4787 4788 4789 4790 4791 4792 4793 4794 4795 4796 4797 4798 4799 4800 4801 4802 4803 4804 4805 4806 4807 4543 4808 4809 4810 4811 4812 4813 4814 4815 4816 4817 4818 4819 4820 4821 4822 4823 4824 4825 4826 4827 4828 4829 4830 141 2908 559 621 370 205 277 1831 2319 315 314 316 318 317 319 4831 4832 4833 4834 4835 1560 1559 4836 4837 2239 4838 4839 4840 4841 1476 4842 4843 4844 4845 3049 3048 404 1790 1795 4846 4847 4848 4849 4850 2363 4851 2332 4852 4853 4854 4855 4856 4857 4858 4859 4860 4861 4862 4863 4864 4865 4866 4867 4868 4869 4870 4871 4872 3618 4873 4874 4875 4876 4877 4878 4879 4880 4881 4882 4883 4884 4885 4886 4887 4888 4889 4890 4891 4892 4893 4894 4895 4896 4897 4898 4899 4900 3306 3354 677 4901 2365 3152 4902 4903 2940 4904 4905 4906 4907 4908 4909 4242 4910 4911 2334 2373 4912 4913 4914 2337 4915 4916
64 4917 4918 4919 174 4920 4921 4922 4923 4924 4925 4926 4927 175 4928 4929 4930 4931 718 4932 4933 4934 4935 4936 4937 4938 4939 4940 4941 4942 4943 4944 4945 4946 4947 4948 4949 4950 4951 4952 4953 4954 4955 4956 4957 4958 4959 4960 4961 4962 4963 4964 4965 4966 4967 4968 4969 4970 4971 4972 4973 4974 4975 4976 4977 4978 4979 4980 4981 4982 4983 4984 4985 4986 4987 4988 4989
65 2543 4990 266 269 4991 969 673 1855 1845 1857 1853 3827 4048 1852 1850 674 3829 1762 2278 1847 274 4992 4993 791 810 4994 4995 4996 3805 3583 1546 4997
66 1601 4998 524 4999 2310 5000 5001 2301 480 3737 2071 2070 4602 5002 3105 5003 801 5004 5005 2141 5006 5007 5008 408 5009 5010 311 1430 4498 529 5011 478 1169 559 5012 4609
67 5013 5014 5015 2323 5016 4519 1569 2362 2071
68 5017 5018 5019 5020 4813 5021 5022 5023 5024 5025 5026 5027 4857 5028 3154 5029 5030 5031 5032 5033 4876 5034 4855 3616 5035 5036 4764 5037 5038 3607 3617 5039 5040 4820 5041 5042 5043 5044 5045 5046 5047 4872 4732 5048 3611 4737 5049 5050 5051 4785 5052 4766 5053 3609 5054 5055 5056
69 5057 1708 473 5058 5059 621 3107 552
70 5060 160 365 4358 5061 4365 3447 5062 5063 1242 5064 5065 5066 1342 5067 5068 4389 525 5069 329 201 333 5070 5071 335 433 5072 444 5073 337 4367 5074 3453 340 4956 5075 4963 5076 5077 5078 5079 346
71 2701 2694 5080 5081 5082 4562 5083 2721 2872 5084 5085 5086 5087 2863 5088 5089 5090 5091 5092 141 5093 5094 5095 2751 2836 5096 5097 5098 2687 2702 5099 2746 2773 5100 5101 5102 5103 5104 5105 5106 5107 2013 5108 2713 4559 5109 5110 5111 5112 5113 5114 3407 3399 5115 5116 5117 5118 5119 5120 5121 5122 5123 2704 5124 1857 1845 5125 5126 1843 5127 970
72 4091 2525 5128 2337 5129 5130 1463 5131 5132 5133 5134 692 3198
73 945 600 5135 5136 2967 5137 1993 821 5138 1546 5139 1685 5140 5141 5142 5143 5134 1551 559 800 545 297 619 176 189 5144 192 206 2887 5145 369
74 5146 128 5147 3487 5060 4367 344 345 386 395 426 413 415 5067 5148 3513 5149 5150 5151 5152 5153 375 5154 5155 5156 5157 5158 5159 5160 5161 378 131 391 5162 5163 5164 5165 5166 5167 978 5168 5169 5170 5171 5172 5173 3800 5174 5175 5176 5177 5178 5179 5180 276 5181 3801 5182 3586 5183 5184 5185 5186 5187 2648 5188 5189 5190 5191 315 319 314 447 4598 5192 5193 416 385 4356 4355 129 553 2887 2567 316 1569 317 318 4833 622 5194 1537 5195 5196 5197 5198 5199 5200 5201 5202 1500 5203 5204 1277 1279 5205 5206 5207 1509 1511 5208 5209 1519
75 1708 3934 3822 1977 1886 2490 2337 3130 1840 2399 4178 461 4096
76 4359 4367 3490 5210 4490 5211 3758 415 4635 5212 5213 5214 5189 5215 1806 5190 5216 5217 5218 5219
77 1067 5220 5221 3827 1853 1851 1847 1848 1857 1845 3928 1855 1849 1846 1852 1850 3948 472 1843 686 675 3829 674 673 969 691 690 4048 917 1930 5222 5223 5224 5225 5079 5226 5227 5228 3543 5031 5229 5230 5231 5232 5233 5234 4937 4959 5235 5236 3551 3553 3554 5237 5238 3548 3546 5239 5240 5241 5242 5243 5244 5245 3545 5246 3552 3547 5247 5248 5249 5250 5251 5252 5253 5254 5255 5256 5257 5258 5259 5260 5261 5262 5263 5264 5265 5266 5267 5268 5269 1023 3569 5270 3570 2656 1017 5271 5272 5273 5274 5275 5276 5277 5278 3572 3581 280 5279 5280 5281 5282 5283 5284 5285 5286 5287 279 5288
78 5289 5290 5291 5292 1198 1638 5293 5294 1302 5295 5296 1224 5297
79 2624 5298 1288 529 545 1208 205 1432 195 1210 778 779 1441 1439 5299 1784 192 1442 5300 1448 5301 5302 3266 5303 5304 5305 2297 1307 1419 2163 1664 5306 3627 1402 5307 5308 183 5309 5310 5311 5312 1362 5313 1417 1365 1364 1370 1371 1369 1368 1372 1378 1381 1375 1380 1377 1390 1386 1385 1383 1384 1388 1366 1418 5314 5315 5316 456 3366 970 1955 5317 1973 1861 5318 1843 5319 877 675 1933 2525 160 1363 5320 5321 2427 5322 366 5323 1665 5324
80 5325 144 5326 5327 5328 5329 5330 5331 5332 5333 5334 5335 5336 5337
81 5030 5338 5339 5340 3064 243 244 260 4974 5341 5342 5343 5344 5345 5250 5346
82 2545 2236 5347 5348 5349 5350 5351 5352 5353 211 1307 5354 5355 5356 2558 2193 5357 456 1168 5358 497 5359 5360 4380 5361 160 1644 1676
83 5362 5363 5364 5365 5366 5367 5368 5369 5370 5371 5372 5373 5374 5375 5376
84 189 200 2252 5012 3040 5377 758 5378 5379 4602 5380 5381 5382 3089 2327 5383 3737 5006 5384 5385 5386 5387 5388 3038 3029 406 5389 781 2123 809 2132 556 1556 2484 192 1432 1439 195 5299 1792 3021 1442 1783 4520 2097 5390 405 1473 5391 5392 2310 5393 205 5394 5395 3059 1594 5396 5397 3739 5398 5399 1435 2347 5400 5401 2472 3052 1421 1464 2315 5402 5403 4841 1608 477 5404 5405 5406 3793 5407 2247 5408 5409 5003 3105 5410 5411 5412 3794 5413 2249 1472 5414 5415 2242 1791 4840 3765 2301 5416 1430 3073 2474 5417 478 309 2473 298 5418 296 5419 5420 5421 204 3133 5422 447 5423 3767 766 5424 5425 5426 5427 5428 1493 5429 1500 5430 5431 1504 5432 5433 1516 5434 5435 1515 5436 5437 722 5438 3065 5439
85 5079 5343 5440 4946 5189 5212 5213 5441 5442 5443 5444 5445 3609 3607 5446 5447 5448 5449 5450 5451 5452 5346 5453 5454 5455 5456 5457 5458 5459 5460 5461 5462 4663 5463 5464 5465 5466 5467 5468 5469 5470 5471 5472 5473 5474 5475 5476 5477 5478 5479 5480 5481 5482 5483 5484 5485 5486 5487 5488 5489 5490 5491 4794 4743 5492 5493 4543 5494 5495 4908 4431 5496 5497 5498 4905 4755 2337 5499 5500 5501 5502 5503 5504 5505 5506 5507 1627 5508 835 1356 5509 2025 1628 5510 5511 2015 827 5512 5513 2020 5514 2019 5515 911 5516 5517 5518 5519 5520 5521 5522 5523 837 5524 5525 5526 5527 5528 3191 2971 5529 5530 5531 5532 5533 5534 5535 5536 5537 5538 5539 5540 5541 5542 5172 5543 3261 5544 5545 5546 1609 5547 5548 5549 978 5550 283 5551 5552 1352 4850 2432 2363 5553 5554 5555 5556 5557 5558 5559 5560 5561 5562 4418
86 5563 2886 5564 5565 4598 5566 5567 5568 5569 5570 5571 5572
87 5573 1321 3462 5574 5575 5576 5577 5578
88 3609 5579 5580 5581 5582 4371 367 5583 5584 5585 5586 5587 5588 5589 3610 5590 5591 5592 1355 5593 5594 5595 5596 5597 5598 161 5599 165 5600 160 5601 5602 5603 5604 5605 2373 2673 4635 455 1352 2364 2337 5606 5607
89 5608 5609 1111 303 805 1635 3719 2555 1644 5610 5611 4527 2426 2474 1336 3638 1231 5612 3472 2484 4654 1441 5613 5156 2232 5614 5615 5616 525 293 5617 2141 5618 5619 1159 5620 5621 5622 5623 3672 3682 5624 5625 5626 5627 1189 1182 1199 5628 5629 5630 237 1630 1395 5631 801 5632 5633 3697 5634 2127 291 294 374 1615 313 312 321 4623 529 397 5635 5636 4622 5637 2265 2319 2160 5638 5639 331 5640 5641 5642 2896 5643 450 316 5644 5645 206 4458 1591 187 369 2102 2085 195 1792 192 196 2088 767 290 1424 5646 5647 5648 1425 1789 1788 1426 3466 5649 5650 5651 5652 548 775 208 198 779 2894 2619 5653 1632 2580 5654 2420 2457 5655 5347 4596 3043 1428 1437 1436 5656 5657 5658 5659 2502 5660 5661 5662 5663 5664 5665 2435 5666 5667 2434 2437 3624 1302 5668 2496 5669 2497 5670 5671 1288 1149 2489 5672 5673 5674 5675 3538 2179 222 235 1175 1323 1212 5676 2507 5677 215 5678 5679 1300 5680 5681 5682 277 2266 2633 1325 5683 5684 5685 5686 5687 5688 1493 5689 5198 5690 5691 1284 1537 5692 5693 1304 5694 2236 1307 5695 2514 3692 5696 1211 2463 1260 5697 1805 5698 230 2495 5699 5700 219 5701 2478 5702 5703 5704 223 5705 5706 1195 216 5574 5707 5708 3070 5709 5710 4551 3636 5711 5712 3643 2226 3743 5713 5714 5715 5716 5717 2971
90 642 1657 5718 5719 5720 5721 5722 5723 5724 5725 5726 5727 5728 1658 5729 5730 5731 5732 5733 5734 5735 5736 5737 5738 5739 5096 5740 5741 4561 5742 5743 2684 5744 5745 5746 5747 2705 5748 2691 5749 2692 2687 2690 2862 2863 2880 5750 5751 5752 5753 5754 5755
91 379 5699 5756 2540 4374 342 425 5757 5758 5759 4448 5760 5761 5762 364 5763 1421 1474 1553 481 2301 478 2464 309 446 2346 536 450 316 317 318 315 314 319 313 1615 312 374 291 294 293 205 321 320 5764 2567 132 5765 5766 1613 5767 3033 2568 5768 447 5769 2526 1835 5770 1600 2249 3048 2238 5771 4843 1791 176 187 295 307 306 805 324 323 325 3420 3472 303 292 809 1706 553 296 208 2317 2417 5772 329 5773 5774 531 5775 5776 5777 5778 5576 5577 5779 5780 5781 1419 5782 5783 1671 5784 5785 5786 5787 5788 5789 435 5790 383 5791 2290 5792 367 3111 5068 5793 5794 5795 5796 5797 5798 5799 5800 5801 418 423 421 346 365 5802 5803 335 5804 5805 5806 326 327 388 389 426 5060 1399 5807 5808 5809 5810 5811 5812 5813 5073 5814 5815 378 385 344 424 131 428 415 413 414 429 430 431 5816 5817 5818 5819 5820 343 5821 1404 1394 5822 5823 5824 363 2297 3540 5825 5826 5827 5828 181 5829 5830 5831 5148 5832 5833 5834 5835 5836 5837 5838 5839 5840 5841 5842 1344 420 4442 395 384 394 393 387 386 392 416 345 340 5843 1400 1346 5844 432 130 427 422 333 337 2296 5845 482 5846 5847 1363 5848 5849 4617
92 5850 5851 5852 5853 5854 5855 5856 5857 5858 5859 5860 2951 5861 1268 1485 5862 5863 575 5864 5865 5866 5867 5868 5869 5870 5871 5872 5873 5874 5875 5876 5877 5878 5879 5880 397 5881 5882 2893 5883 4656 3463 4523 3792 1831 5884 5885 477 5886 196 3771 305 2900 550 187 812 176 3464 5887 5888 5615 1601 2146 620 5889 5890 2085 189 815 370 2568 447 4623 2078 192 791 3420 2075 292 621 194 2360 2127 369 2096 2116 2117 3784 5891 801 5004 5892 5893 5894 2437 5895 2434 5896 5897 5898 5899 5900 5901 5902 5903 5904 5905 5906 5907 5908 5909 5910 5911 5912 5913 5914 5915 5916 3887 1933 1740 1851 4173 1755 2396 2491 2283 3946 5917 714 2525 5918 5919 5920 5921 5922 5923 5924 5925 5926 5927 5928 5929 570 5930 5931 5932 5933 5934 5935 5936 5937 5938 5939 5940 5941 5942 5943 4207 5944 5945 5946 5947 5948 5140 5949 5950 5951 5952 5953 5954 5955 5956 5957 2443 1537 722 5958 5959 5960 51 5961 1169
93 53 4674 4672 67 5962 5963 5964 65 81 5965 5966 5967 5968 93 97 70 5969 5970 5971 5972 5973 5974 5975 5976 5977 5978 3219 5979 5980 5981 5172 5982 122 5983 5984 5985 5986 5987 5988 5989 5990 5991 5992 529 2295 2315 5993 1437 1208 1831 5994 2327 369 1777 545 5995 194 1433 1779 553 205 779 1421 1782 202 1442 189 176 4525 187 792 192 5996 5997 195 3475 5998 5999 118 1213 59 6000 6001 6002 76 125 6003 6004 6005 6006 6007 6008 77 6009 6010 3744 94 6011 115 6012 6013 6014 6015 6016 107 4673 1215 83 6017 6018 6019 6020 6021 1352 559 6022 2319 2483 6023 1594
94 6024 6025 6026 6027 6028 6029 6030 559 6031 6032 6033 6034 6035 6036 6037 6038 6039 6040 2368 1954 1712 3945 6041 1933 714 1821 3946 744 746 6042 6043 2525 6044 6045 6046 1609 6047 4398 6048 1236 160 6049 6050 6051 6052 6053 6054 543
95 2976 6055 2001 2025 1628 1627 822 6056 2022 833 2023 2005 1629 832 1998 6057
96 3292 6058 6059 6060 6061 6062 6063 6064 6065 6066 6067 6068 3232 3186 6069 6070 6071 6072 3189 3190 6073 6074 6075 6046
97 6076 6077 6078 1492 6079 1493 4994 6080 6081 5173 5174 3800 1284 1502 6082 1285 6083 6084 1491 1517 6085 1682
98 691 6086 2525 397 192 369 6087 792 559 662 656 1030
99 2592 179 4510 6088 6089 6090 6091 6092 6093 6094 6095 212 1233 6096 6097 6098 4596 6099 6100 5701 5698 1134 6101 6102 2557 6103 6104 5629 6105 2174 6106 1133 1541 6107 160 6108 1264 6109 6110 718 6111 6112 2497 1695 1225 1698 1288 6113 5692 218 2624 1407 1237 2556 2495 5297 2229 2599 4450 6114 5695 2514 3692 1188 1254 178 2574 5697 6115 2633 1666 2622 1632 6116 2591
100 6117 5343 6118 5258 6119 6120 5452 6121 6122 4946 6123 6124
101 6125 6126 370 304 303 2323 1553 307 306 6127 791 619 302 553 6128 6129 6130 1780 6131 5889 192 6132 6133 6134 369 6135 4625 6136 5619 797 3071 6137 4608 4641 6138 816 6139 6140 6141 6142 6143 1776 6144 6145 6146 6147 6148 6149 6150 6151 540
102 1638 1224 1198 5290 5291 5292 5694 6152 6153 4384 6154 2195 1679 6155 6156 2194 6157 5351 1637 5631 6158 1250 6159 6160 6161 6162 6163 6164 6165 3790 6166 6167 6168 6169 1627 837 976 1696 6170 6171 6172 6173 6174 6175 6176 3655 1127 6177 6178 6179 6180 6181 3711 1131 3661 3699 3664 1129 1130 6182 3637 3665 3648 6183 3660
103 2421 3659 3663 3662 3661 3660 381 3635 6184 3644 3654 3636 6185 3621 3620 3619 2546 2547 2548 3542 2522 6186 2498 1127 3655 1129 382 3648 1130 5678 6187 6188 6189 6190 4533 6191 6192 6193 2364 6194 3714 6195 2618 1140 1336 1189 3632 227 1229 2514 6196 3629 6197 2479 2535 6198 1226 2580 2537 3664 2577 2424 3624 6199 3682 3672 3678 6200 2578 2505 1625 2617 2608 6201 545 619 2097 2895 6202 2111 6203 1777 6204 4463 369 2091 2058 2099 6205 549 2319 1831 1795 198 197 792 205 192 3475 6206 6207 1593 447 1207 6208 2610 1307 6209 1167 1636 3114 6210 6211 3695 1149 221 6212 1291 1324 6213 1295 6214 1541 6215 6216 6217 6218 6219 6220 6221 2542 4528 1233 6222 6223 6224 2497 216 2622 1695 2623 1453 5626 1235 6225 6226 2583 6227 2633 1141 6228 1298 1296 4527 6229 1262 5711 3694 1231 5684 2456 1120 6230 6231 3693 2420 179 2179 1288 223 3777 6232 2521 5693 6233 6234 237 211 1258 6235 6236 6237 6238 6239 6240 184 6241 6242 2181 6243 6244 1352 2222 559 2337 456 1299 6245 6246 1304 1303 1227 6247 6248 1160 6249 2488 6250 6251 6252 1413 6253
104 384 1307 2624 1342 336 335 6254 5781 1419 5782 5838 6255 6256 376 2603 6257 6258 365 419 435 379 1665 6259 6260 5787 5788 6261 6262 5820 5822 1394 5846 5821 6263 363 414 415 413 3540 6264 6265 3431 1321 3476 5790 128 6266 1671 333 1399 347 338 341 339 378 387 386 393 394 392 416 426 429 395 418 5845 482 327 326 6267 5836 5779 183 377 4497 6268 4496 6269 6270 6271 6272 6273 5062 4365 6274 6275 5063 6276 6277 6278 6279 5153 224 4373 5683 4372 6280 6281 6282 6283 6284 6285 4451 6286 129 6287 6288 4613 6289 6290 6291 6292 385 6293 6294 6295 6296 6297 3627 5824 420 1401 1346 6298 1400 423 425 1345 340 6299 4592 5313 6300 6301 6302 6303 6304 5837 214 6305 6306 6307 6308 1145 6309 6310 6311 6312 6313 6314 332 6315 6316 6317 6318 6319 3488 6320 6321 6322 4386 6323 6324 6325 3457 1454 6326 3542 6327 2548 3622 4512 1229 6328 6329 5626 1113 3541 5842 1338 434 5840 6330 131 6331 6332 1642 6333 6334 6335 6336 6337 6338 6339 6340 6341 6342 6343 6344 1674 6345 213 6346 4442 346 6347 6348 2224 6349 2452 6350 6351 2628 6352 2555 1126 3678 6199 5624 6353 6354 2522 2235 1695 2622 1117 6355 6356 4507 6357 6358 130 1406 3790 160 456 6359 6360 718 717 6361 6362 4936 6363 4952 6364 4965 6365 1224 1198 6366 6367 6368 6369
105 1553 6370 6371 1791 557 1554 2238 401 405 1436 3059 6372 6373 2244 6374 6375 6376 6377 2265 1617 6378 3030 6379 6380 6381 6382 6383 6384 5772 6385 6386 3054 6387 6388 2485 400 1594 2321 6087 6389 6390 6391 6392 6393 6394 6395 2566 6396 6397 6398 2510 203 6399 6400 6401 6402 6403 6404 6405 6406 6407 6408 559 6409 6410 6411 6412 6413 6414 6415 6416 6417 5386 6418 6419
106 1594 4357 6420 6421 387 386 344 345 388 422 425 333 4356 4355 1338 1339 6422 336 1343 443 378 364 342 341 385 416 426 131 365 337 395 384 6423 6424 6425 1354 825 835 1356 6426 6427 5759 6428 6429 6430 5842 391 1344 1342 6431 6432 5061 6433 5323 6434 1411
107 6435 2488 2420 1632 6436 6437 6438 1225 2449 6439 2437 6440 1228 6441 3753 1623 6442 4470 192 3071 6443 6444 1782 6206 202 552 1783 1784 206 6445 293 2362 189 782 4656 209 1421 4572 6446 1793 6447 2075 4466 208 553 1706 6448 6207 800 5887 6449 1295
108 6450 6451 6452 5162 6453 4191 6454 6455 4192
109 3376 2797 6456 6457 6458 6459 1085 1049 982 988 1056 6460 6461 6462 6463 6464 6465 6466 6467 6468 2911 6469 6470 2792 6471 6472 6473 3367 958 6474 1027 6475 6476 663 661 994 6477 665 662 659 657 993 656 3899 992 3847 1029 3938 628 6478 3875 658 660 6479 6480 6481 6482 6483 4409 6484 6485 6486 3824 4093 6487 2375 664 6488 6489 6490 2036 6491 6492 1870 4407 6493 3352 4203 6494 6495 6496 6497 973 155 6498 6499 2923 2529 6500 3533 4030 6501 6502 6503 2972 6504 6505 951 838 1104 6506 1066 1062 6507 1100
110 746 6508 4037 656 6509 819 6510 6511 3958 2926 615 1038 4061 2382 1933 6512 664 747 1039 1734 2944 3357 2635 6513 6514 6515 1540 6516 6517 651 1816 1708 4138 2913 635 893 6518 6519 6520 578 2491 6521 821 6522 6523 1712 6524 2281 3974 3895 3953 4107 4106 4063 6525 2970 6526
111 425 443 5761 1371 379 6527 333 337 338 419 422 418 339 340 1399 388 5842 1339 1338 389 390 1342 6528 421 4367 4358 160 456 4430 6529 6530 6531 6532 6533 6534 6535 6536 6537 6538 6539 6261 4354 347 482 5846 5821 1406 5822 1394 2624 1109 6540 4365 6421 2297 6541 6542 5802 335 5804 6543 1345 426 6544 5758 341 5787 5786 5817 5784 5819 6545 6546 3437 6547 6548 5062 5063 6276 3433 6549 3447 3478 3477 1205 6550 1204 127 6551 4474 3451 1203 6277 3446 3497 6552 6553 6554 4476 6323 6555 4447 6420 6556 5061 2317 6557 6558 297 4570 4574 4569 4573 4577 523 3101 6559 6560 6561 2266 363 431 430 429 427 428 378 5756 6562 385 392 393 394 420 1373 1379 1367 4393 1382 1374 1376 1377 1366 1383 1384 1389 366 6563 5310 6564 5824 377 213 5806 6565 327 6263 1419 4371 2172 376 4356 6566 183 6567 406 5813 5790 5789 435 4449 6568 6569 1369 1387 5783 6291 2246 767 6373 2510 407 408 6570 6571 3765 6374 412 6572 411 410 2466 6573 6574 6575 768 2269 6576 374 2248 6577 6578 391 417 4837 3052 6579 5003 801 5006 4498 5617 5008 5379 6580 6581 6582 6583 6584 5402 6585 6586 2141 2465 3085 6587 1319 6588 6589 6590 6591 6592 1430 6593 2250 6594 5418 2289 4629 6595 1444 6596 481 6597 5388 6598 3097 2243 6599 5767 6600 3487 441 5632 6601 778 2567 1615 6602 6603 6604 6605 6606 1591 2156 6607 2136 556 2127 1706 809 1587 810 2121 3043 2123 2305 757 311 6608 6609 409 6610 2483 3304 6611 6612 6613 6614 6615 2302 446 558 2245 6616 6617 2322 2464 6618 6619 5012 5001 334 3739 5777 6377 6620 6621 2306 1558 536 2346 764 6622 477 6623 6624 6625 6626 5401 2268 537 6396 6627 2252 479 447 6628 6629 6630 538 437 6631 549 6632 329 6383 6633 6634 525 5771 368 6635 6636 6637 6638 2071 3070 2247 3055 2291 2472 3024 6639 6640 1421 2301 5410 478 5382 6641 480 6399 6642 6643 6644 208 530 198 6645 4353 6646 6647 545 6648 5994 3463 6649 195 5650 5651 796 548 5883 6650 775 202 552 553 2093 814 1788 1789 1787 1424 782 189 2095 1425 196 187 792 302 1437 6651 316 359 349 357 360 6652 6411 1436 6653 6654 6655 6410 539 3107 6389 1478 3048 6656 6378
112 6657 3970 3833 2926 4203 1463 729 3920 6658
113 3948 1929 1877 900 6659 6660 898 899 4288 6661 6662 6663 1994 6664 6665 468 1720 1722 6666 2968 744 6667 1965 944 945 2525 6668 1165 6669 6670 6671 6672 895 3587 4289 289 917 469 1959 2279 679 6673 4480 4106 6674 6675 4013 4349 614 6676 1029 6677 624 6678 6679 3244 6680 1032 919 6681 472 839 2396 730 1042 6682 6683 6684 992 6685 994 1755 1060 2370 6686 1853 1849 1855 6687 4159 564 3263 571 6688 6689 874 1739 1080 6690 1937 6691 6692 6693 3885 6694
114 6695 6696 1336 6697 6698 6699 6384 6700 6701 6702 356 352 353 354 6703 351 349 350 355 6704 6705 6706 6707 6708 6709 6710 6711 6712 4598 6713 1350 1307 6714 1236 160 6715 6716 3462 6717 6718 2634 6719 6720 6721 1128 6722 3665 6723 3649 6724 6725 1130 6184 6726 1127 6727 381 6728 6181 6172 3647 3658 6729 6173 6180 6182 6183 382 6730 3637 6731 6171
115 6732 1515 1518 1516 1517 6733 1483 5430 6734 1015 2653 6735 6736 6737 1536 254
116 4117 615 1745 6738 6739 2918 3825 3826 655 627 3918 571 6740 572 3934 691 690 3827 1853 578 1067 714 1730 4056 967 3874 2524 707 1755 3848 1933 917 916
117 6741 6742 6743 6744 6745 6746 6747 6748 6749 4003 4111 6750 628 3825 6751 2637
118 6752 3609 6753 5473 5476 6754 6755 4823 4724 6756 3618 6757 4818 4785 6758 4793 6759 4871 6760 4828 6761 4829 4787 6762 6763 6764 4803 6765 6766 6767 6768 4764 3616 6769 6770 5053 5056 3611 6771 5048 6772 5050 4821 4732 5047 5045 6773 6774 5044 4737 5017 4820 6775 4726 4736 4819 6776 6777 6778 6779 6780 6781 6782 6783 6784 4720 6785
119 2525 397 3463 302 189 553 775 2096 192 203 6786 2674 814 5144 784 6444 1421
120 6787 6788 6789 6790 6791 6792 6793 6794 6795 6138 6139 3305 6796 540 6797 6145 3304 6149 1775 6798 6799 6800 6801 4646 3037 6802 3268 1607 6803 1593 1602 6804 451 1606 450 6805 6806 6807 6808 317 318 314 315 331 319 6372 321 313 312 2346 1615 525 3052 368 539 1795 198 6647 6809 6572 756 6810 305 2148 6811 2362 6812 2907 6813 6814 6143 6031 6815 6816 6817 6818 6819 6820 1317 553 369 2108 1210 316 6821 6822 6823 775 805 324 778 776 779 777 371 202 206 1786 176 6824 5415 4458 6825 6826 4657 293 6827 782 1424 1426 1425 2095 1789 1788 196 1787 6828 1790 2097 761 796 2074 6829 6830 1209 814 6131 5302 3227 6831 195 6832 795 794 790 545 2299 792 187 205 2078 3137 192 6833
121 1730 3959 1842 1910 3313 624 707 1492 274 6834 266 2396 1755 917 1933 714 472 4015 1708 2415 3833 6835 642 1719 150 6836 6837 574 6838 2044 3995 3992 3389 6839 2395 1718 6840 4244 1538 1893 4086 6841 6842 3963 1986 6843 6844 6675 937 601 6845 6846 820 3192 6847 2664 6848 145 4005 4133 6849 696 582 4060 4061 607 879 4078 6850 6851 6852 6853 1752 6854 6693 1879 6855 2639 4085 6856 6857 6858 6859 6860 6861 6862 6863 3596 6864 4289 6865 6866 6867 6868 4102 600 6869 1875
122 2592 1336 2174 213 181 6870 5830 6871 6872 6719 2550 1623 6873 6874 6875 1119 1183 2175 6155 6876 5679 1224 5355 1810 1337 6877 6878 1648 1123 6879 375 6880 1647 6881 5295 2457 6882 6883 6884 1156 6885 195 302 192 440 6886 6887 6888 6889 6890 6891 1292 1157 6892 6893 6894 6895 6896 6897 6898 211 6899 1361 6900 6901 3790 4619 6902 6903 6904 6905 1645 6347 385 5839 6906 1696 2193 6907 6908 1693 6909 6910 6911 1302 1195 456 3628 1663 6912 6913 6914 6915 6425 1307 2205 6916 6917 1688 1697 1186 6918 2599 6919 1352 2222 6920 6921 6922 6923 6924 3192 5582 6925 6926 1227
123 2324 315 318 316 317 2252 2249 529 200 6927 6928 5402 6585 3070 619 369 2096 302 203 6929 3025 3082 623 437 1553 6930 2299 2300 2464 6931 5410 3522 6932 5682 6933 6594 4646 2270 478 402 3059 2511 3469 2417 6934 6935 1428 3038 2308 6936 546
124 372 6937 920 6938 6939 6940 6941 3732 525 329 1601 6398 4583 3092 6942 296 6943 6944 6945 6946 6947 545 2324 2895 293 760 187 812 1433 1779 2899 2064 551 205 1782 1442 1789 791 1786 2093 369 782 3266 6948 192 198 792 6949 6950 6951 6952 6953 3107 5418 6954 6955 4321 6956 6957 6958 6959 4294 5400 6960 6961 6962 477 3022 186 6630 6963 2289 6964 6965 2099 6966 6579 194 529 3052 1831 6967 6968 1594 3094 4579 6969 6970 1567 6971 6972 3105 6973 6974 6975 6976 458 176 6977 3099 6978 6979 6980 451 547 6981 6982 6983
125 5114 6984 3568 3564 3566 6985 6986 6987 6988 6989 6990 6991 6992 6993 6994 6995 6996 6997 6998 6999 7000 2971 7001 7002 4441 7003 7004 7005 7006 7007 7008 7009 7010 7011 7012 7013 7014 7015 7016 7017 7018 7019 7020 7021 7022 7023 6539 3405 5112 7024 7025 3401 3407 3399 7026 3404 7027 7028 7029 7030 7031 7032 5116 7033 7034 7035 7036 7037 7038 7039 5117 7040 7041 7042 7043 7044 7045 7046 7047 7048 7049 7050 7051 7052 7053 7054 7055 7056 7057 7058 7059 3486 7060 7061 7062 7063 7064 7065 7066 7067 7068 7069 7070 7071
126 4510 3643 179 7072 5698 1413 2541 1233 2622 1235 1302 7073 3796 1632 7074 7075 1303 1110 1242 6329 2501 218 7076 1149 4596 2608 1134 6233 1323 5611 7077 1809 5695 2426 5679 3708 7078 3755 7079 6102 5683 1292 4424 1262 1288 1141 5778 797 409 192 6131 1433 205 7080 552 202 1795 1831 207 2484 209 4625 187 792 2181 7081 5701 1115 3697 2607 6101 229 227 1322 7082 2495 5610 237 1238 5684 2420 7083 7084 3706
127 1244 1625 3775 3702 4615 7085 1288 7086 3701 2187 7087 6165 7088 2180 2575 1294 2448 1663 2602 7089 1292 7090 3790 2226 7091 1646 7092 7093 7094 7095 7096 7097 7098 5674 4536 7084 1810 2426 5675 7099 7100 7101 5680 2599 822 1627 7102 1626 7103 7104 2478 6327 7105 3668 7106 3719 7107 7108 7109 7110 3633 7111 5094 1702 2179 7112 2593 7113 7114 7115 1428 1692 1194 3327 4342 1182 4994 7116 5685 7117 7118 7119 7120 51 6905 7121 4369 3820 3583 4294 7122 7123 3735 7124
128 2753 7125 7126 7127 7128 7129 7130 7131 7132 7133 641 2878 7134 7135 7136 7137 7138 7139 2851 7140 7141 2843 2748 2722 7142 638 7143 2721 7144 7145 5083 7146 2882 7147 7148 7149 7150 7151 7152 7153 7154 7155 7156 7157 7158 7159 7160 7161 7162 7163 7164 7165 7166 7167 7168 7169 7170 7171 7172 7173 7174 7175 7176 7177 7178 7179 7180 7181 7182 7183 2844 2747 2857 2745 7184 2845 2756 2715 7185 7186 5746 2705 7187 5749 2864 2863 2758 2842 2859 2733 2692 7188 7189 7190 7191 7192 7193 1571 553 187 176 7194 6131 545 619 290 2114 7195 7196 316 317 4836 318 4831 548 550 551 779 778 776 777 319 805 1784 195 790 202 1442 2299 6931 3031 7197 300 7198 6574 800 369 2093 7199 208 189 782 2078 4648 7200 6650 1831 1795 794 203 196 192 1792 559 7201 6139 7202 1242 1353 829 827 7203 7204 7205 7206 2018 7207 7208 825 7209 1356 1354 2019 837 2800 7210 7211 5099 2740 2693 7212 7213 7214 7215 7216 7217 7218 7219 7220 7221 7222 7223 7224 7225 7226 7227 2871 2827 2779 2706 7228 2743 7229 7230 2812 7231 7232 2741 7233 7234 2737 7235 7236 2727 7237 7238 7239 7240 7241 7242 7243 7244 7245 7246 7247 7248 7249 7250 4553 4340 7251 7252 7253 7254 7255 7256 7257 7258 7259 1906 7260 1888 1758 7261 7262 3840 934 1910 142 7263 4480 677 7264 838 2525 7265 7266 7267 7268 7269 7270 7271 7272 7273 3126 7274 7275 7276 4341 7277 7278 7279 7280 7281 7282 2750 7283 2876 7284 7285 7286 7287 7288 2821 7289 7290 7291 7292 7293 7294 2877 7295 7296 5751 7297 7298 7299 7300 7301 7302 7303 7304
129 7305 265 263 273 246 266 262 7306 4250 3063 7307 4246 4253 2543 7308 4254 7309 7310 7311 1538 7312 7313 7314 7315 7316 5339 7317 7318 7319 7320 4267 7321 268 7322 7323 4252 7324 7325 7326 7327 7328 7329 7330 7331 7332 7333 7334 247 267 274
130 7335 1021 7336 7337 7338 7339 7340 822 7341 7342 2314 7343 7344 7345 7346
131 2346 3739 311 7347 3092 6599 2270 3097 7348 3087 2137 6608 1592 7349 7350 7351 2248 7352 2291 7353 7354 7355 7356 320 1552 7357 1608 481 7358 439 7359 5419 7360 7361 7362 7363 7364 446 5382 2567 536 7365 3044 7366 7367 2566 534 5003 2472 1791 7368 1553 7369 7370 1435 3107 7371 552 3731 6824 7372 7373 7374 7375 7376 1133 7377 2514 3500 5009 2136 1795 6602 1615 2295 2342 7378 1620 3094 7379 7380 7381 2239 3082 7382 6571 7383 7384 7385 7386 6943 2249 7387 5396 4609 7388 7389 2347 5391 2310 3767 447 7390 2467 529 7391 3105 1422 3081 2299 3794 801 6449 7392 203 4840 2294 7393 6935 767 1464 405 5422 7394 7395 3133 298 6927 132 2483 4498 2417 7396 7397 545 3474 195 398 7398
132 7399 7400 7401 7402 7403 7404 7405 7406 7407 7408 7409 7410 7411 7412 2436 2437 7413 7414 7415 2432 7416 7417
133 4207 7418 7310 7419 6930 2266 2510 2265 559 265 4268 5438 7420 7421 7422 274 7423 7424 7425 7426 6834 4317 7322 4306 7320 7427 4259 4309 4260 4336 7428 4211 4263 4262 4257 4258 4256 7321 4264 4265 4266 7429 7430 7431 4267 266 246 247 7432 7433 7434 7435 7436 7437 7438 7439 7440 4296 7441 7442
134 128 7443 7444 7445 3636 4537 1231 184 6247 6098 7446 1302 2536 2622 1292 2606 7447 5705 2497 1241 7448 2588 7077 2418
135 7449 7450 3610 7451 1941 571 7452 3315 7453 7454 7455 464 821 7456 7457 1685 1500 3404 7458 7459 7460 7461 7462
136 7463 2434 7464 7465 1538 7466 3609 5017 4738 4818 4729 4819 3607 4828 4829 4827 4787 4820 6758 6756 575 7467 7468 7469 3154 7470 7471 2971 721 7472 7473 7474 7475 4887 7476 4407 7477 4914 7478 6117 6749
137 2536 1307 1292 2552 1450 1670 7479 3655 1128 3654 3636 1294 1142 1263 1231 3694 1235 1810 1639 7480 7481 3231 1293 2593
138 69 115 7482 7483 3191 2635 2972 2337 141 118 1217 7484 2525 693 6477 714 1723 1720 1729 1719 4079 3386 1722 1721 1764 3978 3262 1724 3979 6666 1718 7485 7486 7487 468 7488 733 7489 6855 7490 3885 3871 6692 3870 7491 4161 3869 7492 7493 7494 7495 73 77 79 7 7496 8 53 58 59 7497 7498 104 105 7499 119 7500 76 80 74 75 7501 7502 5963 7503 7504 7505 3192 68 7506 126 7507 98 7508 108 7509 7510 81 7511 7512 7513 7514 7515 7516 545 553 176 7517 194 305 192 2482 6821 2097 306 1782 538 1780 814 7518 784 4656 209 1448 3266 7519 4466 792 7520 5997 3475 5998 619 307 621 559 7521 6015 107 7522 1215 7523 7524 7525 7526 7527 7528 7529 114 7530 71 7531 7532 7533 7534 64 7535 7536 5973 7537 7538 7539 5980 5972 6020 7540 85 62 7541 52
139 6423 837 2019 2536 283 7542 4207 3527 1541 718 3272 7543 1540 7544 1155 3490 6455 7545 7546 7547 7548 7549 7550 51 4192 7551 7552 4432 7553 2451 7554 5062 6317 4443 7555 4499 1405 5321 1183 2296 6272 1292 3758 7556 5445 4366 3508 6553 7557 3489 7558 7559 7560 4481 224 6550 127 4477 128 3453 332 1392 7561 7562 3783 978 7563 7564 3459 4488 7565 7566 7567 7568 1352 7569 7570 7571 7572 7573 7574 7575 7576 7577 7578 1811 6039 7579 302
140 7516 126 8 3730 7580 0 81 83 96 6008 6018 7581 72 73 7495 7500 643 7582 68 7583 7508 7584 5970 7585 66 110 5979 1460 1458 1461 5982 7586 120 7587 7588 4674 5966 6010 4672 7589 7590 4673 7591 115 6011 1811 4416 7592 7593 7594 7501 3219 7595 563 7532 7596 1459 91 7597 7511 7598 106 1215 107 122 7599 7531 5990 7600 7601 7602 5983 7603 7604 7605 7606 7607 108 6012 7608 7609 7610 5452 7611
141 7612 2694 2736 2819 7613 7614 2750 7615 3504 7616 5226 4947 3192 605 7486 1718 1729 1720 1722 7617 7618 7491 463 464 1755 2491 4161 7619 7620 7621 7622 7623 7624 7625 7626 7627 7628 5093 7629 7630 7631 7632 141 677 146 7633 1029 7634 3559 870 1842 3878 7635 7636 1077 1076 1078 7637 7638 1933
142 7639 3146 7640 7641 7642 7643 7644 7645 7646 7647 7648 7649 7449 7650 7651 7652 7653 7654 7655 7656 4551 7657 2592 7658 7659 7660 7661 7662 7572 7663 3161 7664 7592 978 7665 6423 3211 7666 7667 3164 3155 7668 3167 7669 7670 3183 7671 7672 7673 7674 7675 7676 2373 7577 7677 3166 7678 7679 7680 7681 7682 1287 7683 4398 7096 6366 7684 7685 7686 7687 7688 1674 7689 7690 6343 6344 7691 2593 7692 160 7693 7694 7695 7696 3180 7697 7698 7699 7700 7701 7702 7703 7704 7705 7706 7707 7708 7709 7710 7711 7712 7713 7714 7715 7716 7717 3177 7718 7719 7720 7721 7722 3169 7723 7724 7725 7726 7727 7728 7729 7730 7731 7732 7733 7734 7735 7736 3182 7737 7575 7738 7739 1800 7740 7741 7742 3162 7743 3899 628 693 4782 468 714 465 1933 1930 2396 917 3945 7744 473 934 674 673 1855 691 1853 1067 1712 2490 463 464 7745 1938 1822 1755 1029 3850 4344 1821 3323 2525 7746 3173 7747 3615 7748 7749 7750 7751 7752 4796 3154 4408
143 4994 7753 7720 5734 7754 5729 7755 7756 1650 7757 3949 1772 7758 3323 1882 455 7759 4118 7760 2525 7725 7761 7762 1331 7763 7764 7765 7766 7708 7767 7768 6037 7769 7770 7771 1538 7305 7772 7773 7774 7775 7776 4300 7777 3170 7778 7779 7780 3192 7781 7782 7783 2217 7784 7785 2219 7786 2220 4419 7787 7788 7789 7790 7791 7703 7792 7793 7723 7576 7794 7415 7795 7796 2437
144 3152 7797 7798 7799 7800 7801 7802 7803 7804 7805 7806 7807 7808 7809 7810 7811 7812 7813 7814 7815 7816 7817 4495 7818 7819 4773 4774 7820 7821 7822 7823 7824 7825 7826 7827 7828 7829 7830 7831 7832 7833 7834 7835 7836 7837 7838 7839 7840 7841 7842 7843 5601 5567 7844 6710 5569 5568 2673 7845 7846 7847 7848 7849 7850 7851 7852 7853 7854 7855 7856 7857 7858 7859 7860 7861 7862 7863 7450 7864 7865 7866 7867 7868 7869 7870 7871 7872 7645 7873 7874 7875 7876 7449 7877 7878 7879 7880 7881 7882 7883 7884 7885 7886 7887 7888 7889 7890
145 7891 3369 4294 7892 7893 733 714 7894 7895 7896 674 969 673 7897 7898 7899 7900 7901 7902 6687 2276 7903 571 1959 7904 7905 843 954 953 3607 3617 2334 3610 7906 7907 7908 7909 827 7910 2337 4220 7911 4850
146 4994 2673 3010 7755 7754 1652 7756 1650 7720 7912 7913 7757 649 3323 1772 3949 1882 6423 7759 4118 7760 7836 3154 7725 7706 7761 239 7914 7915 7916 7917 7918 7339 7919 7323 7920 7921 7763 7764 7765 7766 7922 7708 7772 7923 7924 7925 7770 5663 7926 7774 7775 7309 4300 7927 3170 3192 7778 7928 7781 7782 7794 7783 2219 2220 4419 7788 7789 7929 7792 7793 455 7777 7930 7931 7769 7415 7795 7796 2437 7932 2432 7739 6037 2365 7933 951 4162 1082 2635 2525 7934
147 7935 7936 7937 6684 1932 3883 7938 737 7939 5058 632 3872 7940 615 7941 7942 7943 7944 7945 2491 7946 564 2278 7947 2377 7948 7949 7950 1861 696 7951 3118 7952 2680 2398 7953 7954 1973 7955 2676 3247 7956 1772 7957 4338 1970 7958 7959 7960 7961 2042 1969 1972 7962
148 1853 3827 691 690 2395 7963 4682 7964 7965 1985 7966 3905 7967
149 7968 5158 5157 5161 5160 7969 5159 5156 5154 5155 186 7970 7971 7972 7973
150 7974 2597 7975 7976 7977 5211 7978 7979 7980 7981 7982 7417 7983 5892 7984 7985
151 7986 7987 6779 7988 7643 7989 7990 7991 7992 7993 7994 7995 7996 4240
152 7997 7998 7999 8000 20 8001 22 8002 18 17 8003 3598 8004 8005 8006 8007 8008 8009 8010 29 8011 8012 8013 4690
153 1970 4106 466 4214 8014 628 1969 8015 2371
154 8016 8017 7974 8018 8019 8020 5013 8021 8022 8023 6589 205
155 5195 1487 8024 1463 1285 8025 8026 8027 8028 8029 8030 8031 8032 8033 8034
156 6255 8035 8036 5147 8037 8038 8039 8040 8041 8042 6262 2458 2540 8043 6299 6303 8044 1234 4613 1228 1636 8045
157 8046 8047 4581 7385 4642 1396 1352 3777 2578 8048 129 128 6938 8049 4582 8050 8051 8052 8053 8054 8055 8056 8057 8058 8059 8060 8061 8062 8063 8064 8065 8066 8067 8068 8069 8070 8071
158 6017 98 84 66 96 8072 1537 1493 6007 88 7496 125 118 104 68 106 105 108 92 94 115 8 61 69 58 59 54 55 7497 5962 7 6016 7507 57 8073 102 90 65 86 64 8074 56 8075 8076 52 8077 8078 53 8079 60 3 4 63 8080 8081 7541 7513 121 8082 67 6013 97 8083 8084 8085 8086 8087 8088 8089 8090 8091 71 7511 8092 8093 110 5983 8094 8095 7984 8096 8097 8098 8099 8100 8101 7605 8102 8103 7985 575 8104 1217 3191 8105 8106 8107 5991 5976 113 7523 8108 8109 7408 8110 7540 91 8111 3730 7595 5973
159 8112 1820 8113 8114 3369 4076 2398 3984 33 8115 8116 8117 8118 8119 8120 6478 8121 1933 6693 8122 2922 2680 8123 8124 1824 1842 8125 8126 8127 3853 933 8128 8129 8130 4684 8131 8132 8133 8134 3600 3932 8135 8136 3372 3976 8137 8138 8139 3823 3973 8140 715 3897 593 733 8141 8142 846 6847 1958 7111 8143 6869 8144 8145 8146 875 8147 8148 1843 821 8149 8150 718 8151 609 1841 8152 881 8153 7944 8154 1901
160 3702 1257 5617 6593 2142 7393 8155 6372 793 5703 1706 2136 553 2123 325 3420 8156 4992 4993 8157 810 8158 1237 2603 6257 8159 5063 6273 1204 5062 8160 8161 8162 2560 8163 3538 1303 2519 1302 1182 3542 1288 8164 4501 219 211 8165 180 1304 3719 3668 2501 5673 1160 8166 8167 3695 1212 718 720 8168 8169 8170 178 1252 8171 7084 8172 8173 2541 7073 2544 8174 8175 8095 7846 1352 1287 8176 8177 2462 8178 6247 1111 3703 8179 1636 1228 1292 5675 6243 5614 1191 5701 2520 2554 1666 212 3661 8180 8181 8182 2463 3687 1174 5610 5670 2174 1236 8183 8184 2489 2618 6232 5704 545 208 176 4654 2126 2117 4611 1208 5886 8185 8186 547 410 305 3464 2104 2110 8187 5651 292 1780 8188 814 556 4625 797 550 778 779 2091 8189 2674 189 622 209
161 7015 8190 8191 8192 8193 5111 8194 8195
162 7599 66 7586 5982 8196 978 3191 8197
163 8198 6106 8199 3144 3174 8200 8201 129 8202 8203 8204 8205 372 7347 802 187 186 4646 4623 620 6588 298 6587 2289 300 374 371 205 6577 558 8206 791 810 4992 6127 305 304 370 4993 6125 8207 2461 8157 6126 325 556 2136 296 292 809 546 1189 2549 2426 3652 6184 1127 1130 8208 8209 8210 8211 2556 3687 5670 8212 1225 8213 7481 8214 7480 8215 8216 2536 4392 220 6223 3752 8217 8218 1151 8219 8220 8221 8222 456 4510 1302 2626 8223 2585 1253 1326 5657 1325 8224 8225 7123 8182 3740 1289 1261 8226 221 1149 8227 8228 1132 1305 8229 8230 6881 8231 8232 1157 8233 8234 1630 2807 2773 4111 8235 460 4090 730 1755 8236 1881 3110 8237 8238 8239 8240 8241 8242 3294 8243 3295 1061 1307 8244 8245 180 1257 2423 8246 2495 212 8247 4470 4424 2177 1233 2449 1288 1262 8248 4513 1133 8249 8250 8251 1718 8252 875 8253 8128 4229 8254 8255 692 8256 1232 2541 1115 3697 7083 8257 8258 1292 8259 8260 8261 8262 8263 3367 1152 2220 1537 5430 8264 8265 8266 1231 8267 8268 8269 631 7121 4376 6224 2634 7446 2363 1352 2498 1287 6047 1609 8270 8271 8272 136 8273 51 7551 1695 1625 2635 8274 917 6495 8275 8276 2914 3357 2913 7953 8277 1322 1239 8278 8279 6253 5697 8280 8281 8282 8283 8284 3789 5693 3776 8285 8286 8287 2597
164 621 8288 1581 8289 5409 8290 2247 6372 8291 8292 8293 320 8294 1579 3090 1564 546 8295 1580 6812 7394 5421 8296 1563 1811 3074 8297 1795 8298 1620 478 2324
165 204 2067 6955 5423 8299 8300 296 2254 558 6613 2302 310 446 2245 309 6611
166 5763 8301 2345 1475 203 1477 764 4629
167 924 587 591 660 1732 718 8302 4131 855 889 710 1826 8303 8304 4853 4774 2283 729 3124 8305 628 655 3835 8306 3826 3825 8307 594 8308 874 8309 8310 1993 8311 2981 8312 8313 8314 580 1708 4344 1739 8127 8315 2405 586 8316 8317 3839 8318 8319 7635 8320 4084 1815 8321 8322 991 8323 6520 8324 4101 8325 590 973 805 2289 545 2097 199 4523 1428 778 187 529 192 1782 1442 812 207 206 4646 8326 3266 277 3134 373 293 8327 6207 369 189 559 8328 2337 1759 577 2273 1906 1077 7947 3882 7948 2491 8329 8124 734 893 1816 8330 3323 8331 733 8332 881 1032 1755 8333 887 600 584 3843 4079 3862 2922 4052 564 3950 8334 8335 8336 3894 8337 8338 8339 8274 8340 1772 882 8341 4140
168 127 332 6274 8342 5063 8160 5062 6276 6320 6341
169 1216 5963 8343 8072 8344 8345 8346 8347 8348 5980 8349 6017 109 1215 8350 8351 7602 7504 8352 110 88 8353 8354 5990 3219 8088 89 8355 8356 8357 8358 8359 84 8360 8086 8109 123 8108 7596 8361 6010 8362 8363 5079 8364 5970 116 87 6021 8365 5999 1217 8366 835 8367 822 8368 832 8369 8370 8371 8372 8373 5985 3191 8374 6011 8375 1811 8376 8377 8378 7608 8379 3730 5973 5991 8380 3192 4242 8381 4910 7819 8382 8383 924 925
170 1502 8384 8385 8386 8387 8388 5173 5430 8389 1500 8390 8391 1512 6079 8392 8393 8394 6733 5435 8395 5174 5175 5176 8396 8397 1314 1276 8398 8399 1490 1491 254 8400 8401 8402 8403 8404 8405 8406 8407 5177 8408 8409 8410 5178 5179 8411 3008 8412 7831 7830 8413 4764 3616 6769 5053 3609 3611 4732 3607 5047 4820 4871 6760 4720 4828 4818 8414 8415 8416 8417 8418 4729 4819 4730 6776 4726 8419 4738 6757 5017 8420 8421 8422 8423 4545 837 1353 825 827 2016 2015 2017 1357 2013 2014 5512 824 829 8424 3820 8425 8426 8427 4361 8428 8429 8430 8431 8432 4996 8433 8434 5139 4326 8435 8436 8437 1544 1545 2921 8438 2931 8439 1496 8440 1499 1498 8441 8442 8443 1497 1268 8444 8445 8446 8447 8448 1495 5133 8449 8450 8451 8452 1685 8453 8454 8455 8456 1283 8457 5134 8458 5129 8459 8460 6081 8461 8462 8463 8464 8465 8466 8467 8468 8469 8470 8471 8472 8473 8474 8475 8476 8477 8478 8479 5686 3800 8480 8481 8482 1312 1311 8483 8484 8485 8486 8487 8488 8489 8490 8491 8492 8493 3811 8494 3809 8495 8496 8497 8498 8499 5688 5687 8500 8501 8502 5429 4362 5691 5690 8503 8504 5376 5374 8505 8506 8507 8508 8509 3805 4997 4994 8510 8511 8512 8513 8514 5138 8515 1684 7119 1494 8516 8517 725 1551 8518 8519 8520 8521 8522 8523 8524 8525 8526 8527 8528 7450 7865 7870 7864 8529 8530 8531 8532 850 852 8533 8534 8535 8536 8537 5601 7843 8538 8539 8540 8541 8542 8543 8544 8545 724 723 722 8546 8547 8548 8549 8550 1270 8551 8552 8553 8554 2645 8555 8556 1277 8557 8558 8559 8560 8561 8562 8563 1546 8564 8565 8566 8567 8568 8569 8570 8571 8572
171 2310 8573 8574 5568 5565 7416 4598 8575 8576 8577 330 8578 5423 6449 3019 3787 3039 8579 8580 8581 8582 8583 6087 6628 1564 622 1574 1581 8584 396 6574 6557 7366 8585 2256 2257 3031 8586 6613 310 8587 8588 8589 2266 6930 3522 2291 2346 8590 8591 536 4837 317 316 319 315 1559 1560 767 399 400 6595 8592 480 1428 8593 458 8594 8595 8596 791 2123 2136 2137 2139 303 8597 6126 810 553 292 809 1706 302 408 3070 546 2566 8598 8599 4581 8600 8601 4572 4578 3101 4577 5777 8602 1469 8603 8604 8605 8606 8607 8608 4569 8061 204 197 3052 537 1831 1795 299 6587 8609 3059 5000 5001 5012 2248 3739 2289 620 6588 298 368 6598 6570 2252 478 6577 4574 8610 8611 6590 412 311 558 334 8612 6931 7367 3097 2246 8047 8053 8050 8613 8614 8615 2190 8616 8617 8618 8619 4642 4585 8620 8621 8622 1430 5008 8067 8623 189 8624 8625 1466 1467 8626 8059 8627 8628 2896 8629 318 4833 3738 2267 446 8630 8631 8632 8633 4629 4571 6624 8634 8635 8636 4567 8637 8638 8639 8640 8641 8642 8643 8644 8645 8646 8647 8648 8649 8650 8651 8652 2268 8653 8654 8655 8656 8657 6979 6571 3069 8658 3028 3023 6608 8659 525 3303 3302 6977 8660 6029 8661 6030 4583 8662 8663 8664 8665 8666 6968 8667 8668 8669 8670 8671 8672 6938 8673 8674 453 8675 8676 8677 8678 8679 4580 8680 8681 8682 8683 8684 8685 300 2359 7371 3080 8063 8686 8052 8687 8688 7385 3731 8689 6942 8690 8691 7359 3268 8692 8693 8694 8695 8696 8070 8697 8698 8699 8700 559 6423 8701 6788 6787 8702 8703 8704 8705 6789 8706 6790 6794 8707 6791 6793 6792 8708 8709 8710 8711 8712 8713 8714 8715 8716 8717 8718 6818 8719 8720 8721 7342 8722 8723 8724 8095 160 2127 2153 8725 8726 8727 8728 8729 8071 8730 8731 8732 8733 8049 8734 8735 2466 5645 290 5014 5144 815 4523 6576 8736 6594 8290 2247 1577 3134 6650 8737 8738 3465 1443 1424 8739 5397 766 301 1320 764 8740 8741 2889 4455 2891 8742 5646 1208 8743 8744 8745 2892 1796 3094 8746 1426 3463 8747 1591 5994 6649 5883 1571 2088 8748 8749 1554 8750 8751 8752 8753 8754 8755 8756 192 8757 2097 195 796 8758 1431 4604 4460 1432 8759 8760 2897 4459 548 1792 1433 8761 6589 775 551 779 1782 202 1442 196 1785 1786 2093 369 782 8762 1794 4465 4466 792 187 545 8763 8764 1425 8765 3475 8186 8766 8767 8768 799 8769 8770 8771 8772 8773 4570 8774 8775 8776 8777 8778 8779 4576 8780 2511 774 8781 8782 8783 8784 8785 8786 8787 8788 2251 8789 7362 8790 8791 8792 8793 1444 8794 8795 8796 8797 8798 8799 8800 8801 8802 621 1568 8803 8804 8055 523 8805 437 5393 296 8806 805 6318 1365 1364 1372 1381 1378 1371 1368 1366 1370 8807 1379 1382 4393 1380 8808 1374 1373 1375 1367 1369 1377 1390 1388 1386 1384 1418 8809 1376 8810 1389 8811 1387 1417 1385 1383 6274 1203 3451 8812 4485 8813 8814 4477 1455 4366 8160 8815 6553 4365 8816 8817 8818 3441 3497 8819 3446 3489 8820 8821 8342 8822 6315 4475 5063 8823 5152 5153 6278 8824 5151 8825 6279 8826 6717 8827 5578 5191 8828 7357 8829
172 8830 1515 1513 1509 1511 1508 3801 256 8831 1527 257 258 8832 8384 8385 1492
173 1488 3411 1513 8546 8833 1271 8834 8835 8836 8837 8838 8839 1482 5430 1480 1549 1551 878 8840 2970 543 8841 634 6658 1277
174 8842 8843 8844 8845 8846 8847 8848 8849 8850 8851 8852 8853 8854 8855 8856 8857
175 8858 8859 8860 8861 8862 8863 8864 8865 8866 8867 8868 8869
176 211 1117 3634 1118 5573 1428 406 412 6635 4610 5778 1123 4546 1147 1242 8870 8871 6106 2507 2581 4514 3797 1196 3684 1138 1142 8221 1304 2486 2271 8872 8873 227 8874 1177 1154 1155 1231 2431 1167 1302 2626 8223 1441 8875 1191 6441 2580 2641 1178 5679 8876 8158 1115 1238 6223 1180 1184 1633 3456 1186 1189 1187 5695 1220 1192 1125 2642 2501 1198 1200 1201 8877 2624 1206 8878 1222 527 531 801 6593 325 2141 1582 297 805 8879 6592 2362 6631 798 3420 192 3081 806 305 529 3042 8593 3109 2182 8880 1197 3538 2180 1223 1224 6232 1305 8881 8882 8883 1233 1207 8884 3099 1571 204 7078 1227 1625 3701 1325 8885 229 1150 2489 2179 2478 8886 7552 8887 3442 6111 1690 8888 2178 8889 1262 3709 2539 180 6250 1288 1295 6239 8212 8162 2563 4565 4519 3070 8890 2553 2616 3668 1318 128 2514 1810 210 6233 8891 8279 8892 2425 1252 3499
177 5145 620 205 298 8893 8894 3784 1564 1584 1620 1552 8895 5003 8896 2474 8897 3740 2488 8898 8899 8900 8901 16 4686 8902 8903 8904 6107 160 4914 8905 8214 8906 8907 3598 8908 8909 4688 8910 8911 8912 8913 8914 8915 8916 7963 8917 8918 8919 8920 8921 8922 8923 18 4701 8924 49 8925 8926 8927 8928 8929 8930 8931 7408 2363 2319 1795 2263 3034 3105 559 8932 8933 8934 8935 1149 1242 8936 8937 8938 8939 8940 8941 8942 8943 8944 8945 8946 8947 36
178 5066 1340 129 8232 8233 3707 8258 5653 1183 8948 3749 1230 8949 2494 8229 8950 6881 8214 8951 5781 8230 1157 8952 1244 1292 6892 3773 978 8953 977 1295 5673 1231 375 8954 4452 5837
179 842 878 857 542 543 466 728 463 8955 8956 8957
180 8899 8199 129 8203 8204 2289 6577 546 1189 2177 8958 8215 3643 4392 3752 1211 5696 8218 8959 1169 8960 8211 1232 2557 5628 6107 8961 1690 2423 7123 8182 221 8227 8962 828 8963 8964 8965 5518 2351 8966 8967 8968 8969 8970 1305 4432 5151 8234 1151 5657 8971 1630 8972 8973 3110 7076 5705 1242 8240 6348 8974 8221 1307 8244 8245 180 1257 2576 1302 6441 8246 1667 4424 8975 219 3705 1240 5701 2624 8976 8228 5683 1181 6343 8977 6090 8256 5838 7682 8978 8979 1292 1246 8259 2195 8260 8247 1670 1152 4510 3711 1233 1702 8980 5173 1546 242 274 7431 262 246 267 269 8981 8982 8983 8984 8985 8986 8987 8988 243 8989 8990 4275 5438 8991 4272 7423 7427 239 5697 4376 8992 8993 1235 2634 1811 3789 1663 8994 3774 1182 1625 6106 214 8277 1322 1239 2494 1249 3638 2498
181 8995 8996 8997 5219 8998 3191 8273 8999 9000 134 135 9001 136 8271 9002 137 9003 7666 9004 9005 9006 7525 9007 9008 9009
182 9010 9011 4483 6266 1671 2163 2172 4371 4474 6323 3446 3437 6276 9012 3433 6274 6272 3447 1384 1383 1389 1387 1385 9013 8813 8814 3442 3443 3444 6550 9014 1203 8821 332 8822 9015 9016 3524 6326 3501 9017 3527 9018 9019 2453 1370 1372 1371 1373 1379 1382 4393 1374 1378 1367 1369 1366 1375 1377 1386 1364 1381 1376 1418 1380 1390 1388 9020 3432 5151 9021 2598 9022 3507 9023 9024 9025 3499 9026 9027 3454 9028 4493 9029 6311 3493 9030 3494 3489 6277 4366 6551 9031 9032 9033 9034 9035 5210 3490 9036 1692 9037 9038 2588 2477 9039 6252 7685 2496 7657 6366 7684 7692 7686 2593 7096 7690 7691 7689 7688 1674 2592 9040 9041 9042 9043 9044 9045 9046 9047 9048 9049 6904 9050 6894 6288 9051 9052 9053 6369 8889 9054 3481 9055 9056 9057 1391 3459 3483 9058 9059 3492 9060 9061 9062 9063 9064 2512 6310 3526 8181 9065 7560 9066 9067 4481 6314 444 9068 9069 9070 9071 9072 9073 2290 9074 5792 9075 5316 9076 213 340 365 482 5840 337 5841 5845 6347 346 6543 2296 9077 1399 9078 347 419 1346 422 423 1401 338 6330 9079 418 1345 1404 4442 5821 130 326 327 428 384 9080 131 415 425 333 426 414 1338 6880 375 7077 2162 2161 9081 9082 9083 8159 9084 7567 3523 1454 9085 9086 9087 9088 9089 9090 9091 9092 5760 6544 9093 5761 6429 6430 5758 4448 5759 9094 6428 6427 6431 9095 9096 9097 6421 4357 6556 6545 6546 9098 3515 9099 9100 8044 9101 6254 9102 9103 6338 417 9104 8952 1157 1109 1189 9105 7079 9106 1162 1161 3638 1120 2429 2594 2557 1690 2430 2622 2541 1233 1288 9107 9108 5697 9109 6106 9110 9111 1297 8871 8958 9112 9113 5611 3677 9114 3690 2494 8229 2624 8230 9115 9116 9117 7106 6096 9118 6273 9119 5762 7568 9120 3673 9121 7564 3528 9122 9123 7555 9124 6317 4472 3451 6552 8820 3440 6315 4473
183 1513 9125 1523 5198 1526 257 1528 5173
184 1183 9126 4955 4964 4949 9127 9128 1307 1394 5822 9129 1263 1231 9130 9131 9132 1411 9133 7543 7444 231 9134 9135 7445 5828 5826 5825 9079 9136 9137 6424 6422 1338 9138 1342 1343 8279 1350 9139 9140 9141 9142 9143 9144 3111 367 9145 5699 365 340 333 425 419 422 423 6330 4471 1403 6715 9146 3506 3778 4395 9147 9148 9149 2172 4371 9150 9151 1292 9152 6311 2512 3432 9153 9154 1363 9155 9156 3773 9157 526 9158 9159 9160 9161 2161 1419 6291 9162 9163 9164 9165 9166 9167 3431 6527 8227 9168 718 5315 9169 3511 3482 6549 6265 2605 7557 4365 9170 2228 9171 4482 5840 9172 5313 5836 5835 3439 2210 6346 1344 6904 9173 9174 9175 9176 9177 6215 9178 9179 5741 9180 9181 7158 2723 2748 2773 2757 7229 2700 9182 5106 5109 2870 2659 9183 2777 9184 2751 2727 9185 9186 9187 9188 9189 2869 7159 9190 2692 9191 9192 7443 9193 9194 9195 6257 3448 339 5756 9196
185 4808 1998 1629 824 1999 9197 1354 9198 4890 9199 9200 9201 9202 7859 6746 6748 6747 9203 9204 2005 9205 5508 2027 1997 9206 835 9207 1356 9208 9209 9210 9211 9212 9213 828 8969 8968 9214 9215 2012 8966 2011 2007 9216 9217 9218 9219 9220 9221 9222 9223 9224 9225 9226 9227 9228 9229 2024 1627 9230 9231 6056 2353 2025 2026 2001 9232 9233 9234 9235 2006 2021 2000 9236 2014 7209
186 2536 2599 9237 1645 9238 1700 9239 9240 9241 1352 1679 9242 8994 1703 1638 6888 9243 9244 2425 9245 978 9246 9247 2337 7092 211 9248 9249 1023 9250 1184 1241 1307 8244 1244 1222 1692 9037 9251 1212 3652 9252 1186 6906 9253 6885 1693 9254 9255 1417 9256 9257 9258 9259 2565 6162 7114 1696 9260 2633
187 4077 571 9261 9262 637 722 8451 8475 1502 2921 8153 2991 9263 2404 9264 9265 9266 3389 9267 9268 9269 607 3873 9270 729 9271 2524 9272 9273 9274 9275 6537 9276 9277 9278 5111 3405 3404 3407 7016 9279 7024 5114 9280 9281 5112 4433 9282 9283 7021 9284 7020 9285 2993 1708 614 1964 9286 6477 605 2975 4430 9287 7486 1729 3382 2968 9288 650 651 9289 2792 1047 2047 649 9290 9291 4610 313 374 406 372 294 277 291 292 3043 4657 2141 312 1615 1422 321 9292 9293 2474 4623 9294 9295 298 6576 620 4602 1620 3368 3002 9296 9297 675 461 1853 3920 1910 9298 1732 465 1750 9299 4159 1955 9300 9301 9302 4006 3194 572 2283 1066 9303 832 1355 9304 2001 9305 9306 829 9307 835 9308 1354 830 1356 9309 828 9310 9210 8366 5515 9311 1629 837 9312 4141 844 3943 9313 1734 6042 4153 1714 876 2911 598 4230 2275 2989 9314 9315 6524 9316 9317 9318 9319 668 9320 1728 1755 730 468 9321 6485 9322 3960 1859 6844 9323 2939 2938 9324 9325 3199 845 3252 9326 466 697 3373 9327 2791 6482 9328 9329 462 2529 2787 9330 1064 7458 6520 9331 9332 9333 4231 3017 3397 632 9334 4011 9335 9336 9337 9338 3376 4143 9339 3533 9340 9341 9342 9343 9344 9345 1762 4037 8274 9346 4214 1937 2924 992 9347 2797 6484 2635 1591 410 2319 545 3071 176 369 5144 192 9348 1574 2123 3421 9349 5004 764 775 1552 805 4648 3024 2473 202 205 3023 8725 529 2464 206 189 2465 1320 1437 1436 6832 198 373 792 187 3792 2360 799 199 9350 814 9351 9352 1478 4649 4461 301 9353 9354 559 6139 2056
188 791 2324 2461 1571 1574 1572 7393 2247 4993 6602 3134 4622 3792 1593
189 3134 9355 9356 318 317 319 1471 2067 189 3047 8600 277 7393 9357 5637 1581 805 315 314 296 374 8682 9358 190 7199 7353 2153 2142 525 1795 6607 3103 1594 4579 7974 9359 8053 5410 4570 396 3135 9360 9361 8686 8052 5407 7385 2362 547 9362 6936 9363 458 9364 1319 9365 8054 316 204 9366 208 2319 6131 553 778 1439 1210 5703 1445 6134 369 5301 5302 1787 4464 1424 1788 9367 9368 4463 1789 5646 9369 9370 1425 9371 196 3465 1443 545 9372 9373 1426 6650 5883 3227 3226 195 3792 192 6446 620 9374 6951 2252 9375 9376 9377 9378 8610 6626 9379 9380 6946 8739 2301 8681 4522 9381 8683 9382 4575 2483 5386 9383 2089 9384 9385 9386 9387 9388 5008 408 6638 9389 8802 1553 5192 9390 9391 3106 6610 3732 1569 3268 9392 9393 9394 197 9395 9396 1593 9397 5776 801 8614 9398 187 768 402 4582 6825 1831 8800 1430 9399 5445 9400 2263 9401 9402 2317
190 9403 9404 4663 9405 123 9406 6011 3191 9407 8377 9408 9409 9410 9411 9412 9413 4668 8373 9414 9415 9416 9417 5928 9418 3211 9419
191 472 561 543 596 9420 7894 4086 3243 2404 9421 8906 9422 821
192 9423 9424 9425 7129 2773 9426 9427 2689
193 1709 4914 3834 632 9428 571 9429 9430 9431 2395 9432 614 3352 3130 870 2963 9433 601 9434 3866 3139 821 9435 9436 9437 9438 9439 4122 1088 3943 3383 4060 991 4402 3880 9440 3555 4083 6846 587 585 6738 9441 4015 9442 6510 9443 4117 3843 9334 9444 4012 9445 580 9446 9447 973 176 4525 545 1210 3422 290 2083 9448 305 2900 775 779 778 776 292 800 192 9449 1783 1784 293 2362 9450 782 208 763 195 189 9373 3266 805 373 8762 792 6821
194 870 9451 9452 9453 9454 4204 1755 160 9455 9456 821 778 779 792 187 559 9457 9458 576 2056 2493 9459 8153 155 7009 9460 9461 9462 3402 3405 7027 5115 9463 5113 4430 9464 9465 9466 1513 9467 5131 9468 8460 1546 9469 9470 1023 6869 1841 9471 9472 1709 9473 3872 9474 154 2954 632 1708 9475 9476 9477 9478 9479 718 601 650 1941 747 9480 1903 9481
195 419 423 418 416 426 392 420 9482 365 430 431 427 429 428 130 131 6271 9483 4359 336 4368 422 5060 435 9484 1244 2169 4367 9485 4374 5758 375 9486 9487 9488 9489 1415 6431 7553 333 2171 9490 6883 9491 6980 9492 340 444 5815 5814 9493 9494 9495
196 9496 6273 1183 9497 9498 9499 2590 9500 2428 1663 4509 9501
197 1352 3665 3648 1127 3635 6184 1541 9502 9503 9504 9505 9506 9507 9177 8249 9508 9509 9176 9510 9511 9512 9513 456 9514 9515 9516 9517 9518 9519 9520 9521 9522 3265 9523 9524 9525 9526 9527 9528 8189 559 1236 1538 4221 9529 9530 9531 6009 9532 9533 9534
198 9535 9536 9537 9538 4848 9539 9540 978 575 9541 9542 4377 1165 9543 9544 9545 9546 9547 9548 9549 9550 9518 9551 9552 9553 9554 9555 4663 9556 4664 9557 9558 9559 9560 9561 9562 9563 3679 9564 9565 9566 9567 9568 9569 9570 9571 7435 7434 9572 4296 9573 9574 7322 9575 7305 9576 9577 4260 4259 247 9578 246 272 271 7429 267 268 269 9579 265 9580 7432 273 7433 9581 4267 4294 9582 263 4268 9583 266 270
199 9584 9585 9586 9587 9588 9589 9590 9591 9592 9593 9594 9595 9596 9597 9598 9599 9600 9601 9602 9603
200 9604 9605 9606 4844 5771 5398 9607 3134 3059 324 321 320 4835 315 314 319 4832 1560 9608 313 6604 6603 312 6606 374 205 371 294 291 3464 305 9609 318 317 3048 301 3052 2252 2243 9610 6375 452 9611 6699 1615 9612 2267 9613 9614 9615 1428 1474 3049 2262 9616 9617 9618 9619 9620 4598 4421 6383 9621 6412 1421 9622 202 3070 792 192 805 9623 9624 3099 6126 802 9625 2247 373 9626 9627 9628 442 3092 9629 9630 9631 3105 9632 9633 978 6380 6371 4841 9634 9635 1479 546 2526 1611 9636 9637 2250 9638 6630 9639 2242 9640 5400 9641 440 9642 766 4999 334 1553 9643 9644 6381 1473 9645 2510 4453 5628 141 160 9646 2258 9647 534 9648 6379 9649 9650 9651 9652 9653 9654 6558 310 9655 9656 3192 559 316 2323 2472 2473 9657 529 2315
201 9658 9659 9660 7016 9661 5115 9662 9663 3399 9664 9665 7042 3400 7064 9666 9667 9668 9669 5111 6529 9670 9671 7030 9672 6530 9673 6537 9674 9675 9676 9677 9678 4430 9679 9680 7039
202 9160 9681 9682 4502 1140 3714 237 6891 4432 7566 6309 1292 2226 1224 9683 1665 1664 9498 9684 1597 9685 1195 9686 9046 1699 3070 2301 9687 9688 1307 9689 9494 9690 9154 1321 2319 1615 536 2346 450 5770 1833 331 9691 8653 2361 2567 481 5763 1600 132 5765 5766 1613 5767 446 9692 5805 9693 5818 333 4486 1302 9694 6211 9695 6210 2627 9696 9697 9698 388 9699 9700 8794 9701 226 9702 9703 9049 9704 9705 6719 6226 9706 9707 9708 9709 5825 3664 5699 1679 2228 9710 5313 1693 6915 6889 1362 177 3626 5321 9711 4471 9712 1625 9713
203 6475 2798 914 1039 913 9714 9715 646 670 4006 6459 1056 9716 9717 561 9718 9719 2525 1755 9720 2965 4230 9721 1064 9289 9722 9723 3532 2797 9724 9725 4203 9726 9727 9728 9729 9730 9731 6500 9732 568 4170 9733 9734 4167 4165 9735 9736 9737 9738 943 985 730 5058 4007 1859 9739 2913 1038 2057 4648 369 192 800 619 208 2096 545 553 4455 1423 293 2895 199 305 3421 9740 9741 550 551 779 778 189 9742 1784 1783 3134 9743 2362 4656 9373 9744 1422 792 187 176 412
204 9745 7673 7716 9746 7712 9747 9748 3144 7790 9749 5172 8434 5139 9750 4326 1544 1545 9751 9752 9753 9754 9755 9756 7703 7709 9757 9758 9759 9760 9761 4234 9762 9763 9764 1169 9765 9766 9767 9768 9769 9770 502 162 503 7704 9771 9772 9773 9774 9775 141 9776 5225 4976 9777 9778 3549 7611 9779 2971 4416 545 2895 809 9780 396 6131 2892 1423 552 410 189 6203 1831 548 1779 1788 2087 805 775 305 550 306 9781 1781 4461 1783 369 1786 2093 7199 2136 782 814 784 3266 1586 208 4466 5887 1784 9782 6821 3475 1780 9783 553 176 307 292 5144 192 302 806 621 9784 559 7202 7708 9785 9786 7733 9787 9788 9789 9790 9791 7697 9792 9793 9794 9795 7735 3261 9796 7920 9797 9798 7791 7668 9799 9800 9801 9802 6521 718 9803 9804 9805 9806 9807 9808 9809 9810 2214 9811 9812 9813 9814
205 4576 321 320 4835 1561 315 314 4832 317 9608 313 1615 6603 6604 312 6606 374 294 291 305 9609 6370 4837 2269 4844 3052 2252 9617 6375 6621 3472 6699 7419 4462 1608 9815 9816 2464 5410 2302 2267 6611 446 3059 525 1572 319 1562 1574 1571 1582 5412 9614 9615 9817 9612 9618 9635 9818 9620 4598 4421 6383 9621 6412 9622 9641 202 792 192 324 805 9623 809 3099 9819 802 2247 373 9627 6371 2307 9820 9657 2510 3092 1428 9632 9633 978 9645 1479 9821 546 1611 2526 9637 2250 1555 9822 6630 2242 9640 5400 318 440 766 4999 1553 9610 9644 6381 9823 141 160 334 2258 534 9650 6379 9630 2293 9651 8802 6558 310 2473 9824 9825 2265 3070 9611 9647 559 316 5015 529 2315 9826 9827 452 9828 176 6629 4629 2266 9829 9649 9830
206 3549 5225 3011 2976 9831 5261 5264 5259 5257 5258 5265 9832 5453 6364 4959
207 9833 8173 6424 6372 2567 9834 9835 5550 1165 2533 9836 9837 9838 9839 9840 9841 9842 9843 9844 9845 9846 9847 5466 5465 9848 9849 9850 8057 9851 9852 9853 9854 9855 9856 5444 9857 9858 9859 9860 8780 9861 3077 9862 5445 9863 9864 9865 9866 9867 2673 9868 9869 8577 9870 1023 9871 9872 3568 9873 1010 9874 9875 9876 9877 9878 9879 8693 4626 9880 8480 9881 1685 1684 5138 9882 3755 9883 9884 9885 9886 3782 9887 9888 1755 3366 9889 9890 155 7892 9891 9892 7977 9893 9894 9895 9896 9897 9898 9899 9900 9901 9902 7793 642 6408 1004 7989 2337 9903 8542 9904 9905 7408 9906 9907 9908 1317 9909 9910 7972 9911 7973 9912 9913 9914 9915 9916 9917 9918 9919 9920 5172 9921 559 9922 3091 3737
208 4161 1901 9923 468 594 616 2337 2374 838 1818 9924 1798 9431 1760 1913 2923 2380 2415 691 9480 9925 4075 582 3901 1708 1820 4003 2387 3237 1930 469 9926 821 1684 1931 2963 730 2366 872 473 1963 1965 3559 1823 9927 9441 3404 2396 1755 614 991 9928 1730 692 654 192 277 553 792 187 2360 2263 552 306 208 2362 806 807 205 805 3071 206 4045 3231 2492 1060
209 5191 1111 3661 3662 3663 3660 3664 3659 6604 4835 321 1559 1560 1561 1563 9929 314 315 317 6602 313 9930 4370 9931 5578 9932 1332 1331 9933 9699 3729 6211 9934 5147 5620 1601 9935 9936 5770 553 619 9937 7359 5769 9938 9939 9940 9941 9942 9943 9944 1615 1137 9945 9946 2124 2118 9947 9948 9949
210 9659 9950 5111 7033 5116 9280 7026 9660 9679 3402 7029 9668 9673 9951 9952 9671 9459 9953 9954 9274 9955 9678 7050 7016 9670 9669 9956 7030 9957 9958 9959 9960 9463 7031 9961 2135 2127 756 297 192 206 207 553 305 805 369 9962 1784 9963 372 4656 2136 2090 812 2102 3464 208 5703 809 1424 3474 1209 2097 4523
211 3609 2332 7643 7649 7642 9964 8417 5017 4820 9965 4726 6776 4819 4729 4730 6757 5047 9966 3611 9967 4827 4736 4720 9968 9969 9970 9971 9972 9973 4886 4916 4887
212 204 3070 9974 9975 9976 7173 9977 9978 9979 9980 9981 9982 9983 9984 9985 9986
213 2810 2731 2722 2843 2724 2696 9987 2827 5097
214 9714 9715 2797 9314 6475 6456 9988 9989 1057 664 637 2055 9990 9991 9992 9993 1017 9994 9995 9996 1023 9997 9250 9998 6987 9999 10000 1014 1019 10001 10002 10003 5271 5272 5273 10004 5275 2656 3571 3572 10005 5282 280 10006 5279 10007 5285 5284 9435 3848 655 3939 3851 628 2914 10008 913 943 912 948 914 10009 2792 1074 10010 4347 2798 983 663 662 659 994 2971 2337 658 995 982 2993 1108 10011 10012 6482 10013 542 543 878 6658 9337 1073 9738 1075 6458 2534 2990 950 10014 9718 862 1964 2273 992 988 9736 10015 10016 6685 4094 949 2965 9731 10017 4230 10018 2916 2923 10019 921 2913 1039 9722 656 4231 10020 1058 10021 10022 7916 718 3154 4409 4407 6494 2525 4189 1066 10023 3397 10024 3533 10025 660 960 1963 2938 1755 730 930 4093 10026 10027 10028 10029 2986 9297 10030 1055 10031 2939 7459 10032 10033 668 3368 10034 10035
215 1930 670 3854 591 2399 574 8302 8336 9720 10036 10037 8335 7935 10038 10039 10040 10041 1724 10042 10043 10044 4102 593 3328 3311 10045 3121 10046 605 614 10047 10048 618 1960 10049 10050 10051 628 5136 10052
216 4937 9779 10053 4942 4941 10054 10055 10056 5249 9778 5030 10057 4479 10058 1772 1709 1708 1764 1725 1933 6520 8252 10059 714 877 2525 4960 5245 10060 4950 10061 3549 5236 10062 10063 4939 10064 10065 10066 10067 10068 10069 10070 5076 10071 10072 10073 10074 10075 10076 10077 10078 5256 10079 10080 10081 10082 10083 2867 2773 10084 7167 7179 7155 2706 2692 10085 10086 641 9776 10087 10088
217 10089 10090 10091 10092 10093 5470 10094 2203 10095 10096 10097 10098 10099 10100 3621 6353 6184 1127 10101 5524 10102 10103 10104 10105 10106 10107 10108 10109 10110 10111 10112 10113 10114 10115 10116 10117 10118 10119 10120 10121 10122 10123 10124 10125 10126 5486 10127 10128 10129 10130 5457 10131 10132 10133 10134 10135 10136 10137 10138 10139 10140 9239 10141 10142 10143 10144 10145 10146 10147 10148 10149 10150 10151 10152 10153 10154 10155 5531 10156 10157 10158 10159 10160 10161 10162 10163 10164 10165 10166 10167 10168 5539 10169 10170 5554 10171 10172 10173 10174 10175 5551 10176 10177 5502 10178 10179 10180 5499 10181 10182 10183 10184 10185 10186 10187 10188 10189 10190 10191 10192 10193 10194 10195 10196 10197 9979 10198 10199 5558 10200 10201 10202 10203 10204 5469 10205 10206 10207 10208 10209 10210 10211 10212 9980 10213 10214 10215 10216 10217 10218 10219 10220 10221 10222 10223 10224 3795 10225 10226 10227 10228 10229 1428 1432 4454 10230 3047 3070 546 10231 2417 1599 10232 6571 3069 6570 3097 10233 305 8157 370 775 805 803 323 10234 6202 9781 1577 10235 1569 622 1571 10236 2894 2103 369 10237 9349 2901 528 10238 4608 10239 527 9630 6640 9825 1439 4606 790 3464 8185 10240 812 10241 10242 2482 789 7517 4523 1424 1426 1789 1788 4607 2905 5646 1442 3468 2058 1785 786 10243 4521 1786 3465 8879 6593 6635 10244 529 204 408 3105 547 2093 553 10245 10246 2254 10247 10248 10249 10250 1608 10251 10252 10253 4462 10254 10255 10256 10257 10258 8206 10259 10260 10261 10262 10263 10264 10265 10266 4603 10267 192 10268 2318 10269 446 2344 5410 10270 8781 10271 10272 558 309 3266 10273 10274 2111 764 8738 6444 1794 302 2097 1593 1607 3268 10275 10276 10277 1594 10278 10279 10280 10281 6634 10282 10283 10284 10285 10286 1330 10287 10288 10289 10290 7978 7979 10291 10292 10293 10294 1152 4384 5677 10295
218 5159 10296 10297 3562 8061 10298 10299 8615 10300 10301 10302 10303 3795 10304 1464 8301 10305 10306 10307 10308 8662 10280 10309 8728 453 6625 8639 8634 2263 10310 9861 10311 10312 9357 8060 10313 2473 141 7465 204 525 6589 10314 10315 10316 978 4207 10317 8594 805 1608 5698 197 5015 8614 176 10318 10319 10320 10321 1020 10322 2932 6991 8095 10323 7666 10324 10325 7408 283 1004 10326 6455 51 7911 10327 10328 4432 7566 10329 559 10159 2203 1352 10330 1609 575 10331 10332 10333 10334 2222 2223 10335 2221 10336
219 1574 316 6580 1573 1421 1474 277 9348 1576 3134 1571 1569 8289 10337 372 371 373 3770 293 2674 8584 10338 2263 2258 8634 8639 10339 2361 10340 1479 3469 6594 537 1831 6589 2265 5379 3031 3022 759 10245 8778 8605 10341 2142 2894 10342 6593 1553 10343 1577 6576 549 6558 10344 10345 9816 10304 1572 8301 10346 10347 481 7378 6824 298 10348 3049 10349 3792 9355 438 3021 8590 3025 5407 8591 3788 2346 10253 3268 5385 3300 5001 6614 6613 6611 2267 309 10350 10351 3044 1575 10352 1566 1570 1436 1437 534 6616 3085 5617 2465 294 437 10353 398 10354 10355 315 2567 10356 10238 3136 1583 4498 2359 10357 1444 10358 10359 3080 10360 10361 767 766 10248 10250 10249 6633 308 10252 1430 176 406 4458 10362 10363 10364 7347 3024 8890 10365 772 10366 311 527 6942 10332 5386 197 9615 10233 5391 10367 6595 10368 300 10369 6651 10370 4837 6621 1558 10371 6620 10263 10372 10373 7393 6832 1579 1563 10374 5408 6596 7366 10375 10376 2303 6641 8609 5000 2301 10377 10378 2473 9362 10379 10380 2160 10381 8295 1567 10382 9604 10383 10384 536 7365 7388 439 6623 4522 10385 10386 6655 2071 9640 7419 2510 10387 2266 10388 1593 9628 2062 10389 10390 5387 3791 1620 5410 3305 5638 5421 6930 10391 10392 10393 5009 8725 9634 10394 2136 2124 10236 10395 1435 10396 3765 5427 1472 477 2310 2466 1464 1622 9780 2484 3135 4516 8290 762 189 1582 369 756 10397 2305 296 292 1789 1426 2097 1320 4845 202 2144 10398 2077 1584 6827 782 10399 9947 2255 6138 6142 6139 10264 10400 408 3093 5382 10401 192 10402 8766 6650 10403 799 5883 2127 1478 10404 3784 3078 4622 10405 313 9608 1615 6603 6605 6606 2157 2158 10406 10407 10408 10409 10255 8155 758 1591 6607 10410 5402 6585 10411
220 673 968 969 10412 10413 674 10414 4186 3829 4185 675 10415 10416 679 1843 10417 10418 687 3908 3907 4009 10419 10420 3876 1078 8319 1076 1906 928 7466 10421 10422 10423 10424 10425 10426 7749 10427 10428 10429 10430 571 10431 10432 7943 10433 2980 2283 10434 3194 10435 10436 10437 10438 2406 10439 10440 10441 2370 2405 10442 10443 2407 8315 8329 10444 10445 10446 2276 10447 10448 3615 837 10449 10450 7948 8311 4776 10451 1099 10452 10453 10454 10455 10456 10457 8310 10458
221 10459 7712 3144 9773 7733 7720 9809 5172 9751 1609 10460 9754 10461 10462 7708 9794 9761 10463 7709 9757 9758 10464 10465 9795 7725 9760 9800 10466 10467 9749 7702 9798 9796 10468 9774 5225 3549 9777 9778 9779 2971 9763 545 2895 809 396 6131 2892 1423 552 410 189 6203 1432 1831 548 1779 2087 805 775 305 550 306 9781 1781 1784 1783 369 7199 2136 782 814 784 621 192 1586 208 4466 5887 4523 6821 3475 6446 9783 553 176 307 292 5144 302 806 9784
222 2289 5418 6804 3268 9608 6605 2317 525 1567 1422 1565 1560 315 1559 314 10469 1558 4837 317 10470 5617 4843 1478 2249 3047 316 318 319 1436 197 536 10471 2135 5454 10472 506 10473 10474 10475 10476 10477 10478 10479 10480 5358 10481 10482 10483 10484 10485 10486 10487 5359 10488 10489 10490 10491 10492 10493 486 484 10494 10495 10496 10497 10498 10499 10500 10501 10502 10503 10504 503 10505 9770 162 10506 10507 3589 10508 10509 493 10510 170 513 10511 522 902 905 901 10512 10513 509 10514 10515 10516 1168 456 6937 2988 3333 9739 9719 10517 3808 521 904 10518 491 10519 161 910 165 10520 499 501 4966 1537 3259 10521 3258 10522 10523 10524 497 10525 500
223 9982 10526 10527 10528 10167 10529 10530 5448 10531 10532 10533 10534 10535 10536 10537 10538 10539 10146 10540 10541 10542 10543 10293 10544 10545 10198 9979 10197 10546 10547 10548 10549 10550 10551 9980 10196 10552 10553 10554 10555 10556 10114 10203 10557 10558 9974 10559 10560 10561 10562 10563 10564 9983 10565 10566 10567 5526 5525 10568 10569 10570 5527 10571 10572 10573 10574 10575 10200 10576 10199 10577 10578 9984 5558 10209 10579 10580 10201 5536 10291 10581 10582 10583 10584 10585 10586 10587 10588
224 632 917 461 3933 9480 7022 5136 10589 3960 3310 4344 2923 1986 2415 1739 8142 2679 4231 5111 10590 10591 9724 3946 564 6486 705 10015 2989 10592 714 6052 10593 10594 10595 4045 3914 7996 10596 1843 10597 10598 9316 10599 3196 10600 10601 9271 722 1538 2525 10602 3941
225 10603 10604 10605 3428 10606 6849 2922 10607 8302 2406 3853 4062 10608 2667 10609 2956 868 10610 4430 1925 10611 10612 8152
226 2525 722 8412 6499 6472 10613 10614 957 10615 10616 2529 2534 2992 10009 9988 2990 2991 10617 10618 919
227 44 10619 10620 10621 32 33 8913 7963 3598 3597 10622 10623 10624 10625 10626 10627 10628 10629 8906 10630 4680 10631 10632 10633 10634 10635 10636 46 10637 10638 10639 10640 18 36 37 10641 10642 8917 10643 10644 8900 10645 10646 10647 10648 10649 10650 8936 48 10651 10652 23 10653 10654 10655 8914 10656 10657 10658 4687 10659 10660 22 42 41 40 39 35 8149 10661 4914 10662 10663 8136 10664 10665 10666
228 8048 6333 7446 10667 6302 10668 6285 10669 2224 3431 6265 6264 6304 1365 1369 1372 1370 1371 1373 1368 1364 1367 1382 1381 1378 4393 1380 1379 1374 1375 1390 1389 1366 5491 4495 7818 10670 6687 2378 673 675 674 680 1708 1843 687 688 10671 6910 129 10672 1643 9134 6211 9495 3719 3729 378 10673 10674 8717 6791 6794 10675 6301 1183 1418 1384 1385 1383 1386 1388 1377 10676 10677 10678 10679 5818 128 10680 6720 10681 6907 10682 10683 10684 1236 10685 10686 981 10687 232 10688 1242 10689 10690 10691 455 10692 2538 2168 10693 4294 269 267 247 266 246 2220 10694 10695 3448 3112 5683 6424 10696 10697 9494 10698 9696 10699
229 10526 10700 9986 10701 10702 10703 10704 9240 10705 10706 10707 10708 10709 10710 10204 10527 10711 10712 5560 5470 10713 10714 5524 10093 10715 10716 10224 10165 9978 10531 5532 10717 10140 10538 10201 10532 10718 10719 10720 10721 10134 5538 10722 10723 10724 5558 9984 10559 10725 10726 10727 10554 10728 10729 10730 10731 5447 5448 10732 10567 5526 10108 10139 10733 5539 10135 10734 10107 10536 10735 10736 10737 10217 10738 10739 10740 10092 10218 10741 10742 10743 10744 10745 10746 10747 5505 10091 10094 5469 10110 10111 10184 10748 9980 10209 10212 10210 10211 10749 10164 5535 2201 5536 10750 10556 10114 10557 10572 10751 10568 1123 10752 4546 10753 10754 10755 10756 10757 10758 10539 10759 10760 10761 10762 10763 10286 10288 10289 10287 10764 10765 10766 6753 10767 10768 5549 10769 10770 10771 10772 10773 10774 10775 10776 10575 10574 10540 9985 10777 10778 10779 10780
230 10165 10549 10291 10569 5447 5448 10781 10530 10093 10529 5524 10782 10783 10784 10785 10786 10536 10787 10788 10732 10789 10790 10791 10541 10792 10729 10554 9984
231 2251 4253 4254 10793 7423 10794 10795 5636 3421 1421 10233 10796 321 4519 2568 8894 3105 10797 10798 3047 10799 10800 4610 296 1589 3090 1835 559 722 10801 6641 2067
232 5191 7592 1811 5828 5779 5836 160 3191 7531 6012 10802 1419 1292 128 1609 10803 10804 10805 10806 10807 1405 10808 5172 10809 10810 10811 10812 10813 266 246 269 267 274 10814
233 498 521 489 5359 10815 7346 7343 10816 10817 10818 3749 10819 160 718 4974 10820 10821 10822 10823 10824 10825 10826 10827 10828 10829 10830 3012
234 10722 2203 10831 10724 10721 10832 5558 10559 10833 10725 10834 10581 10835 9980 10732 10789 10730 10728 5505 10836 10837 10838 10735 10536 10546 10839 10840 10841 10842 10586 10763 10843 10844 10845 10846 10847 10707 10212 10569 10848 10849 10850 10851 10787 10785 10706 10852 5560 10118 9985 10853 5555 10854 5534 10742 10184 10855
235 10856 2412 1820 4916 4740 7987 7465 10857 10858 10859 10860 5446 10861 10862 10863 10864 10865 10866 3607 10867 10868 10869 10870 4853 4771 7474 10871
236 7936 3297 870 2525 7575 842 2281 1964 7938 2924 1709 543 10872 10873 10874 6492 631 9267 10875
237 10876 10877 10878 10879 10880 10881 10882 10883 10884 10885
238 5683 10669 2224 3431 6264 6265 6304 380 366 6563 5310 5847 3539 6269 4497 6257 6910
239 10886 10887 10146 10556 10888 10889 5558 9240 10850 10890 10891 10892 10893 10894 10730 10135 10723 10094 10838 10895 5214 10537 5538 10721 10724 10728 10725 10559 5505 10536 5540 10896 10897 10898 10899 10900 10901 10547 10541 10792 10150 10902 10113 10903 10837 10731 10904 10729 10905 10127 10906 10576 10196 10543 10907 10199 10197 9979 10552 10908 10909 10910 10137 10136 10554 10911 10292 10293 9976 5539 10912 10140 10913 10144 10786 10139 10914 10915 10733 10916 10917 5555 10119 10096 10918 10162 10163 10919 10115 10557 10204 10224 10920 10921 10848 10129 10922 10221 10553 5502 10923 10736 10924 10925 10926 10790 10927 10928 10929 10930 10585 9985 10223 9241 10931 10932 10933 10934 5534 10935 9978 10936 10937 5541 10173 5532 10938 10939 10940 9984 10703 10941 10942 10742 10943 5470 10219 5501 5551 10944 5560 10945 5448 10946 5528 10947 10108 10948 10949 5531 10843 10950 5457 5447
240 10951 3191 722 10952 8839 10953 5198 5188 257 1500 5177 1515 1513 7599 10954 10955 2337 10956 10957 1 5963 7588 67 10958 10959 8380 8350 10960 10961 10962 10963 10964 10965 8197 10966 10967 10968 10969 10970 10971 5218 10972 122 6010
241 10973 53 10974 10975 54 8196 5985 10976 10170 1364 1365 1366 1369 1368 1367 1370 1372 1374 1375 1371 1373 1378 1379 1380 1381 1382 4393 1376 1377 1418 1390 1389 1388 1387 1384 1385 1383 7562 10977 5801 5800 10978 5692 8260 2177 6223 220 1631 1233 1199 1632 1134 1702 1261 3740 2423 7123 3633 1225 2495 3776 1196 1191 1240 63 69 10979 6006 76 7500 8365 4672 82 81 101 10980 123 8359 8362 8357 8105 10981 10982 8378 7607 58 61 10983 5970 1458 0 10984 7603 10985 59 10986 10987 6007 83 1214 10988 10989 10990 7514 10991 10969 10992 10993 6016 68 10994 10995 8078 10996 10997 10998 10999 11000 11001 10971 11002 1545 11003 4327 11004 11005 4328 4329 7785 11006 242 259 243 260 244 3065 2543 4253 3067 9574 265 4268 5438 7422 7421 7420 274 7423 6834 4279 4258 4259 4211 4263 4309 4262 4261 4264 4265 7430 7431 266 246 247 7432 7433 7429 4266 4267 272 7435 7434 4296 7436 11007 11008 7437 7438 7439 11009 11010 7327 7441 269 273 7442 263 264 271 270 268 267 11011 9582 4294 11012 1538 2971 8079 7 4392 9031 9036 9033 11013 9021 3507 11014 4432 1391 8360 99 85 92 11015 11016 80 74 71 7501 11017 5986 7540 8076 64 7602 7498 11018 11019 11020 11021 7582 5979 60 7503 11022 11023 11024 7532 11025 57 70 88 6013 11026 5168 8500 7335 5195 8830 1537 8351 56 1292 11027 6107 9508 9510 1236 9157 11028 11029 11030 1135 6234 11031 11032 6439 8871 11033 11034 4469 11035 7609 7511 90 11036 8361 8080 3 8374 11037 11038 5452 11039 11040 11041 11042 11043 11044 5223 11045 11046 11047 10082 3551 11048 5230 11049 11050 11051 5234 3554 11052 5225 5224 7339 11053 7915 7919 11054 11055 122 7483 1459 95 5980 7608 11056 7580 3730 104 109 11057 3212 11058 980 979 3211 11059 11060 4207 11061 11062 11063 11064 7666 11065 3213 11066 977 11067 11068 11069 11070 7543 11071 9513 1541 11072 456 6032 11073 8197 11074 10802 6011 11075 11076 121 11077 1811 11078 7989 8539 8536 7798 11079 2337 160 5990 10956 11080 67 7585 102 1217 1264 52 7541 11081 8082 55 115 7512 62 1216 11082
242 4994 2931 11083 2649 11084 11085 11086 1315 11087 11088 11089 6734 5139
243 628 11090 7958 11091 870 3557 3875 2970 3849 11092 4051 11093 11094 11095 2997 937 4345 844 917 1927 893 11096 6844 11097 681 8151 11098 11099 751 1857 3927 10035 7944 11100 11101 1933 590 1853 3129 6847 11102 3373 9343 3361 11103 11104 11105 2664 7936 11106 7634 11107 10037 11108 6492 733 714 4039 11109 11110
244 7368 557 536 128 2624 11111 407 311 410 1572 7365 10341 450 5770 6372 5767 5766 5765 132 2567 1600 5763 481 446 6575 11112 4458 558 2248 6577 6570 438 7388 412 296 6635 370 2183 7377 1674 1319 3070 11113 7366 11114 11115 4453 5696 5692 1189 2324 1571 11116 451 11117 3747 11118 9413 4660 11119 5538 11120 10915 10721 10136 10724 5558 10725 5505 10554 10559 10735 9240 5536 10167 1292 6223 11121 11122 2071 458 11123 6625 1436 4209 459 460 4092 1720 1721 4782 463 465 714 4055 469 474 1930 470 471 473 472 11124 11125 468 476 461 6623 6627 478 2267 5069 8658 10404 6599 6557 11126 2268 1475 1615 3052 11127 2346 6933 4508 2515 178 1212 11128 4547 3743 9411 3746 5714 8622 2514 418 6572 1594 11129 543 842 736 542 2923 2797 729 2406 571 4054 1067 11130 1938 917 1853 1845 934 674 877 11131 11132 2287 11133 141 4843 3049 1832 525 11134 1791 11135 1556 1553 2251 11136 5704 237 2516 2425 11137 1233 5313 4507 11138 377 422 378 11139 3871 2282 11140 466 11141 839 2396 464 2299 4624 11142 314 5628 1148 2553 6375 539 545 553 1208 1432 2111 290 796 548 779 778 1439 202 1442 369 1786 2093 2305 195 3266 196 4525 792 3475 11143 6605 192 1613 3784 11144 767 6653 3048 5679 2174 1167 4477 3499 1417 1364 1365 1368 1367 1418 1366 1377 1388 1389 1390 8810 1369 1370 1385 1372 1371 1384 1383 1386 1375 1378 1381 1380 3451 6275 11145 1636 1228 2249 2344 331 11146 11147 3736 2257 11148 1933 1962 11149 677 1910 3122 1816 6641 4610 3019 3060 2168 11150 11151 1325 2586 2489 293 5386 301 3729 9494 8798 11152 186 11153 11154 11155 326 2541 11156 2421 810 337 4499 11157 1134 4527 6966 6392 9403 11158 11159 9412 11160 302 1835 2246 4570 1428 3059 156 2525 2345 7353 1422 11161 774 9641 310 4598 5565 7417 11162 3792 11163 208 189 11164 11165 368 532 305 1567 6967 11166 11167 1437 524 408 11168 10797 2483 11169 1831 6558 11170 2472 1610 5008 1430 316 11171 11172 6579 3069 1421 2316 11173 8794 8879 2474 6970 4602 11174 7355 2510 9650 2266 3024 10353 3133 2310 5425 805 3087 791 10800 10390 2473
245 283 11175 2520 11176 5610 3703 1228 1636 1109 1625 11177 1227 11178 11179 11180 11181 11182 11183 11184 11185 9544 11186 11187 11188 11189 11190 11191 11069 11192 11193 11194
246 5459 10533 11195 10716 10702 5557 11196 10531 10718 10538 10532 11197 9978 10106 5473 11198 10836 10899 11199 11200 11201 11202 11203 11204 2202 11205 9986 10838 10789 10554 11206 10934 10936 10847 10769 10772 11207 11208 11209 11210 11211 11212 11213 11214 6753 11215 11216 11217 11218 11219 10776 10768 6353 3622 1113 2548 3620 1395 4482 1396 8204 1331 2201 10914 5190 11220 11221 11222 11223 10761 11224 11225 10148 10717 5535 10116 10534 11226 10782 10583 6276 1804 11227 2522 3542 3621 1398 3112 130 422 11228 11229 5484 10937 10783 5505 10557 9984 5558 11230 10537 10108 11231 5528 10528 10941 11232 11233 10897 11234 5526 11235 10931 5447 10731 10925 6894 10674 11236 11237 11238 11239 5468 10578 10577 5469 11240 10285 11241 5538 10787 5536 10791 5534 5470 10201 1328 5290 1307 11242 9251 10725 10711 11243 11244 11245 11246 5527 5504 9241 5474 10759 5441 11247 5560 10544 11248 10140 10146 10722 11249 10721 11250 11251 9240 5449 11252 10143
247 11253 11254 10165 10722 10146 10889 10549 10711 10564 11255 10577 10532 10531 10718 10201 10901 10919 10112 10160 11256 1330 10723 10767 11211 10774 10891 11257 10204 10728 10768 10772 10775 10776 11210 11219 10773 10771 10770 10769 11209 11208 11207 11218 11213 11214 11215 11216 11212 11217 10557 10927 10725 10833 10835 10789 9980 10581 10836 10837 9984 9985 10727 10732 10730 10541 10090 11258 11259 11260 11261 10129 5457 11262 6753 10540 10575 10719 10572 10751 11263 11264 10120 10152 10151 11265 11266 11267 11268 10703 10704 11269 5503 5548 11270 11271 11272 11273 10198 10199 10197 11274 5558 10543 10173 11197 11241 11275 11276 11277 10928 11278 10735 10584 11279 11280 10950 10792 10911 10929 11281 11282 10224 10128 10116 10551 11283 11284 11285 11286 11287 10221 11288 10890 11289 10843 11290 11291 11245 11292 10709 11293 11294 11295 11296 11297 9979 10781 11298 11299 5448 11300 10731 5447 10935 10113 10945 10102 11301 11302 11303 10902 11304 10903 11305 11243 10179 1306 2550 3711 3659 6183 382 3637 1129 3647 381 6247 2627 1252 2554 2572 2553 8886 11306 4500 2541 11307 11308 1112 210 2555 2463 11309 2501 11310 5713 10715 10150 10923 10782 11311 11312 10787 11249 10574 11250 10547 10932 11313 11314 11315 5553 5540 11316 11317 5461 5533 11318 11319 11320 11321 5547 10134 11322 10161 5530 5505 10191
248 10702 2175 4384 1638 11323 1307 5530 10536 5558 6753 10936 11324 5553 10127 11325 5536 10722 11262 10729 10554 10551 10549 10584 5470
249 11326 11327 11001 11328 123 11329 9009 11330 9007 5219 110 85 11331 11332 11333 563 2222 800 553 208 545 369 324 305 3463 809 2136 9962 176 1433 1779 199 1831 11334 11335 775 805 6445 550 551 778 779 791 1442 189 11336 1445 11337 5769 11338 11339 11340 5015 2323 6621 11341 11342 4831 318 317 314 315 316 1571 3266 10273 2299 187 11343 397 192 3475 8764 5883 6650 1425 196 8766 1787 1788 6207 194 11344 8767 8597 1706 559 1352 3191 10999 6004 11345 10997 11346 11347 10996 11348 11349 11350 11351 6003 11352
250 11353 5158 11354 2248 6577 11355 1706 11356 9356 11357 11358 189 412 11359 5617 11360 11361 10225 410 11362 11363 11364 11365 197 11366 2485 2243 9364 6617 8799 3092 11367 11368 11369 11370 198 11371 11372 11373 11374 448 11375 445 11376 11377 11378 11379 11380 9822 11381 10309 11382 9392 1207 8060 11383 11384 11385 8592 11386 8775 8791 11387
251 10291 11388 11389 11230 11283 11390 5540 10707 10927 10704 10709 10886 10892 10538 11391 10731 10700 10094 10742 10107 10135 11277 10837 10536 10701 5457 10128 5552 10217 10737 10738 10740 10110 10728 10575 11392 11292 10708 11289 10146 10143 10722 10929 10852 11393 10911 11260 10790 10208 11394 11395 10090 10556 10922 10132 11396 11397 10846 10209 10212 10703 10939 11398 10554 9983 10784 10763 10932 11399 11198 11279 11278 10905 11400 11231 11201 10526 11401 10838 10123 5447 10900 10537 11402 11403 11404 11405 11406 10154 10160 9976 10792 5500 11407 10585 11408 10901 9982 11409 10930 5469 11410 10142 10584 10549 10926 11238 11411 11269 10191 5534 11412 10717 10758 9241 11413 6753 10772 10775 10776 10774 11209 11208 11207 11210 11219 11214 11215 11216 11211 11217 11213 11218 10766 10770 10771 10773 11414 5455 10553 11415 11416 10757 10923 11417 11418 11419 10205 10180 5541 11420 11421 11422 10711 10938 11423 10848 10586 11424 11425 5558 9984 11267 11426 11427 9981 10750 10727 11428 10557 11297 11429 11220 10726 10541 10224 10173 10161 5530 10761 10947 11430 11249 11250 10535 5503 11431 5528 10579 5524 11432 10787 10950 5560 10092 11433 10783 10936 5532 11434 10781 11435 11436 11437 6038 6037 4003 11438 673 11439 5125 11440 11441 11442 728 11443 11444 543 736 842 542 4412 10013
252 10291 11445 10901 10929 10838 10837 5558 10559 10725 5505 10721 10724 10832 10728 10730 10732 10581 10834 9985 10833 9980 10789 10835 10536 11296 10711 5528 10173 11279 11446 10575 10853 11447 10922 9978 10787 10554 10920 10531 10936 9981 10553 5532 10547 10537 11448 10158 10143 10926 9986 11449 11240 5448 2201 5534 5541 11238 5553 10703 11293 11450 11451 10729 5530 11247 10195 11452 11224 10950 11453 10549 10930 10715 10224 10116 6753
253 9779 7611 2219 11454 11455 5717 9754 1811 9793
254 11456 11457 11458 11459 11460 11461 3012 2367 2031 2037 632 11462 6688 1757 1037 1719 4080 3980 11463 591 11464 3881 7948 572 571 11465 1845 11466 11467 8129 2491 4161 7952 2667 9328 11468 11125 1739 11469 11470 11471 467 468 11472 7489 3885 7494 3870 3869 11473 11474 474 593 1934 3206 1713 989 1715 1937 11475 713 699 154 945 3875 3848 741 11476 2967 3952 3977 11477 10059 1032 1730 7485 1721 1724 3847 6666 3978 1723 707 4024 1726 1728 1764 11478 5135 693 8269 8268 4782 4055 564 11479 11480 937 7261 11481 7262 463 11482 11483 6665 594 3981 1938 889 3349 465 1936 11484 11485 7488 11486 8127 733 3849 2525 4189 973 837 1996 1169 1168 11487 11488 11489 11490 11491 11492 3265 11493 5467 6039 11078 1811 5466 2929 11494 155 11495 3950 11496 11497 11498 1875 11499 8313 754 11500 11501 11502 7111 11503 11504 11505 11506 11507 982 11508 922 8333 1853 4049 4053 1856 3827 11509 691 4048 1857 3927 4046 1846 6525 596 3986 6751 1746 9322 1716 9481 3382 3850 11510 1029 11511 3262 1725 1727 11512 655 628 3915 3392 1910 2402 583 3955 11513 864 8236 11514 4037 1843 874 11515 11516 3840 917 469 1959 11517 11518 11519 1852 1850 1851 1848 674 145 3194 11520 8307 2981 7492 11521 11522 870 3993 1820 3995 4000 3996 3990 2284 4001 3992 2348 3994 11523 5221 2405 11524 11525 11526 745 1941 1926 3982 11527 2954 11528 6855 6853 1046 6689 2028 2925 4125 6522 3119 11529 11530 1870 11531 7618 11532 712 11533 1718 11534 11535 3939 3999 3997 3998 2960 4708 3264 4003 1742 4111 2637 11536 4410 6740 11537 7745 11538 2286 11539 3205 11540 1930 11541 11542 751 11543 3198 11544 11545 3899 4075 11546 1758 1762 1042 4076 11547 11548 11549 11550 1890 11551 11552 464 3197 3876 3365 11553 1030 658 11554 11555 934 1717 686 11556 11557 1722 1729 1720 11558 4079 8252 714 11559 3204 462 3203 475 11560 11561 9327 11124
255 11562 11563 11564 11565 11566 10824 11567 11568 11569 11570 718 2525 714 11571 1538 9901
256 1292 5355 5684 2425 2521 5678 1299 1188
257 11572 11573 11574 11575 11576 11577 11578 11579 11580 11581 5198 11582 11583 11584 11585 3342 11586 3341 11587 1656 2341 11588 11589 11590 2525 9730 11591 11592 1056 689 992 3318 11593 11594 11595 11596 11597 11598 3334 1651 11599 11600 11601 1652 11602 11603 1650 11604 11605 598 11606 7783 11454 2215 11607 2219 2220 1073 4347 2375 957 1843 5127 11608 995 9989 11609 2678 9738 9471 11610 921 983 10024 4030 8452
258 11611 5288 11612 11613 11614 11615 11616 11617 287 11618 9871 11619 11620 1017 1024 1165 11621 1025 11622 11623 11624 11625 11626 239 242 3805 1014 11627 9436 4303 11628 4319 11629 11630 11631 11632 4304 11633 11634 11635 1277 11636 243 269 11637 7427 2220 2543 11638 11639 11640
259 7844 8575 4598 5564 5569 4599 6710 7845 7912 718 6037 7794 2364 1811 3277 7914 11641 11642 275 4277 11643 11644 3066 11645 11646 11647
260 7976 11648 4422 10164 5450 11649 281 11650 1317 5558 9984 11281 11651 11652 10672 5443 11653 11654 11655 10547 10735 11656 7977 2287 714 7894 11657 4344 3323 2525 1002 7979 11658 11659 3271 4419 1811 11660 11661 11248 5538 10140 10146 11662 11663 11664 11665 10899 10900 5557 5473 11666 5530 5449 10787 9240
261 10622 48 11667 25 11668 11669 11670 13 10629 11671 40 41 42 22 39 35 36 11672 11673 11674 10621 32 33 8912 10637
262 11675 11676 11677 11678 11679 11680 11681 8239 525 11682 11683 11684 11685 7510 452 2896 3097 11686 316 7353 4566 5636 757 374 317 318 319 315 4630 6607 11687 283 3080 772 6809 545 2324 2891 8612 1433 1779 2899 2064 1782 202 1442 2906 1789 369 1786 2093 4611 3465 3266 553 792 3475 195 3137 9783 11688 451 450 6575 1613 314 6653 11689 1582 447 536 9943 4623 5770 11147 767 198 718 9163 11690 1538 11691 6825 11692 6637 543 542 11693 11694 547 11153 1796 3031 6372 302 189 6964 11141 2396 1067 1821 466 1755 571 1930 11695 1822 4344 11696 714 1933 917 1910 2566 539 1594 3048 3049 5397 6558 11697 2253 2344 1430 1615 312 9780 11698 2345 2263 7080 4602 11699 11700 11701 310 3792 11163 11702 372 306 8799 1437 4843 2247 4622 11164 11165 1553 2153 6967 538 294 6579 8897 368 11703 11168 2511 11169 1319 5388 2473 11173 309 5379 1831 1464 8794 6599 5412 6970 11704 10353 331 2474 6972 208 2310 5425 200 2309 6605 3737 1570 3099 11705 7378 1421 11706 9907 9850 3107 11707 11708 11709 8828 5416 9650 446 11710 791 10800 10390 187 11711 11712 2466 3768 9528 3784 808 9292 11713 810 3043 2265 2266 440 9491 204 870 1817 4013 4016 9341 11714 4000 2284 1820 11715 11716 329 529 192 11717 11142 2526 477 11718 2656 11719 5279 6984 8168 555 5287 2650 2651 1015 2652 11720 2654 11721
263 7785 11722 11723 11724 1264 2220 11725 9996
264 5908 4529 5926 11726 11727 3638 1231 11728 2554 11729 1541 11730 11731 6198 11732 11733 2507 1636 1299 1302 1253 1182 4450 11734 7480 4527 5778 11735 11736 2605 1242 8870 5923 5935 11737 11738 5854 11739 456 5930 11740 981 10685 10686 1538 11741 11742 11743 4598 11744 2673 160
265 11745 11746 11747 1165 643 11748 900 11749 6670 4289 11750 2406 591 6684 11751 11752 11753 9326 1758 3309 1085 1041 1040 6685 988 666 668 665 664 663 662 673 11754 11494 11755 11756 669 3893 3892 6869 3243 11757 10420 1731 4111 6751 2637 11758 1815 594 1060 4037 11759 1843 3908 11760 11534 8324 11761 11762 693 11763 11764 11765 4153 1951 751 466 4480 935 1764 1918 4009 1092 472 6693 1094 11766 1080 3120 571 11767 11768 1933 2959 3907 1046 6692 4137 2954 628 10047 11769 602 917 1711 7936 728 542 11770 11771 10035 2664 8124 11772 5135 4075 11773 4063 1928
266 11774 1104 11775 11776 928 709 9288 8128 11777 11778 11779 11780 545 1831 1795 5887 552 5884 189 619 814 775 187 529 192 2099 2097 293 782 209 2484 11781 208 4466 11343 2078 4353 11782 369 9868 8575 9511 11783 4598 11784 2673 11785 6937 1060 11786 7617 11787 11788 564 1061 3318 11789 11505 474 11790 11791 11792 4758 11793 5446 4864 11794 11795 4242 5023 5047 3607 11796 4219 1878 11797 611 4898 11798 7486
267 10702 10287 5450 11799 10092 11300 10569 10526 10528 10782 10888 5214 5457 9975 10713 10575 11256 10721 10724 5558 10560 10582 10559 10728 10918 11800 10920 11801 5448 11202 11261 11802 5530 11803 11804 10534 11220 1330 11805 10849 11806 7464 11807 11808 141 11809 5560 11810 11811 10527 11396 10712 9986 11452 11394 11812 10886 11272 11813 11205 10118 11814 10150 10556 5212 10853 11230 10192 11815 5536 10848 11244 11816 5557 10719 1167 2178 1419 184 237 10932 10780 11416 10289 11817 11818 10837 11819 5190 5216 11820 11311 10215 5503 9983 10789 10554 10927 10729 11393 11821 10890 10843 11240 10549 9241 5532 2201 10836 11822 11823 11824 10108 11446 11246 11200 5447 11825 10181 10205 5470 11419 5500 5469 10532 10941 11826 11827 11828 2203
268 347 1345 1399 6543 346 5845 482 337 333 365 340 425 420 426 416 427 430 431 392 129 9137 4371 5066 11829 6567 4368 4367 11830
269 266 11722 4294 11831 11832 11833 978 1165 1172 11834
270 226 4502 1140 3714 237 2489 1292 1665 2616 2456 1596 2618
271 1023 11835 11836 722 1502 1508 1509 11837 5199 11838 827 11839 11840 158 11841 4734 4495 9426 5748 2692 5104 2746 2659 11842 7290 11843 11844 11845 11846 3152 718 11847 5452 5268 5256 1538 266 7427 5438 4310 6736 11848 11849 3275 11850 11851 3288 11852 11853 1537 11854 11855 11856 8183 2971 2364 11857 11858 3261 11859 2745 2773 642 2365 11860 4702 11861
272 11457 11458 11862 4320 11863 7725 11864 7720 9797 9773 9800 11865 11866 1811 11867 11868 11869 7760 7486 1720 1718 1722 1727 3262 3382 464 5135 2413 707 1726 11483 465 571 6740 11870 2283 11871 991 1938 468 6688 917 469 11106 4116 8249 11872 6993 9163 2971 11873 11874 10823 11875 11876 11877 11878 10827 6031 4523 8593 208 6816 11072 11879 1165 11880 8738 545 619 2096 6825 205 291 176 374 294 538 800 192 369 290 9815 559 11881 7311 6959 239 4207 11882 11883 11884 11885 11886 980 11887 11888 11889 11890 11891 11892 10915 11893 2201 2200 2202 2203 11894 11895 11896 11897 11898 3211 2214 11899 2211 7783 2215 2217 7786 11900 7785 7784 2219 11901 2220 978 11902 11903 934 11148 4401 1023 1025 11904 11905 2314 11906 11907 11908 11630 11909 11910 10816 1729 1730 1739 11911 11912 11913 8714 6791 11914 6789 6790 8705 6794 6793 6792
273 590 6478 1962 1060 473 600 11915 1959 2282 11547 2380 1741 1951 4159 917 469 11916 747 2981 8311 3206 11917 744 585 11918 1933 2493 2525 821 3297 2278 6491 4338 4339 928 838 2676 7948 571 1068 11919
274 11847 11920 11921 11922 11923 3541 3542 2522 1292 10694 51 11924 11925 11926 11927 11928 11929 11930 11931 5440 8363 11932 11933 11934 4950 11935
275 1216 1213 11936 10957 110 92 1215 100 8354 10951 10960 10981 11937 10993 9405 11938 11939 11940 7583 11941 8352 11942 3211 3212 11063 11066 11058 11943 11944 11945 978 11946 977 7666 11947 11061 11062 11065 11948 979 980 4207 11949 8953 11950 5944 11076 11075 6011 8374 8197 3208 11951 11952 11064 11059 11953 11060 11954 11955 7563 10963 11956 8103 11957 10959 11958 10964 89 11959 7497 11960 111 112 8075 96 94 86 66 6017 114 98 99 103 85 5 84 67 102 117 91 93 95 101 61 11961 10984 7483 7603 10958 11962 10992 11963 11964 11965 9006 6003 11966 11326 11057 1217 11967 11968 11969 11970 11971 11972 11973 11974 11975 2662 11976 6536 11977 9462 11978 11979 11980 11981 7060 4430 7010 7008 11982 11983 11984 7001 11985 7059 7006 7058 7057 11986 7005 7003 7004 3486 53 7515 6021 6010 8360 11987 8343 52 7597
276 11988 11989 11990 3543 5341 5342 5226 8344 4942 5250 4939 4938 5031 11991 11992 11993 9518 9516 11994 4944 5030 11995 5246 9519 11996 11997 11998 11999 12000 9522 8266 2525 4189 12001 838 3310 12002 1930 12003 1857 1854 1845 3928 1849 1855 1847 12004 12005 12006 2943 1846 1850 1851 1853 1941 917 934 3926 691 1067 1852 1848 1769 12007 1758 4036 571 1933 2947 3010 4930 11935 12008 9832 12009 12010 12011 5251 3551 12012 12013 12014 12015 5229 5238 12016 12017 5256 5232 6121 4946 10081
277 3544 3548 3549 3551 12018 4946 12019 4944 5030 9778 10055 12020 7468 12021 12022 12023 12024 12025 12026 12027 12028 12029 12030 4735 12031 12032 12033 12034 12035 12036 12037 978 977 4207 12038 12039 11839 12040 12041 12042 7624 12043 12044 12045 12046 12047 12048 12049 6921 12050 12051 12052 12053 12054 12055 12056 12057 12058 12059 12060 12061 12062 12063 12064 12065 12066 12067 12068 7620 7853 12069 7851 12070 7850 7856 12071 12072 12073 12074 7854 12075 12076 12077 3192 7461 7505 7852 12078
278 116 108 8077 12079 7513 8360 7595 70 8079 107 7536 1217 7760 4161
279 11045 2930 572 1893 893 3297 145 149 1854 2657 12080 10009 4093 4859 4756 12081 2337 837 718 12082 642 2875 7129 2728 7287 7233 7286 12083 2687 12084 2733 2800 12085 7697 9748 12086 7791 7716 12087 7768 9795 7733 12088 3373 2525 12089 12090 7701 12091 9799 7728 12092 10460 9772 9753
280 12093 1350 6904 12094 9105 1352 9494 5355 237 1288 211 12095 2478 12096 7448 3687 12097 1212 12098 11151 12099
281 12100 12101 4545 12102 3606 12103 12104 5607 12043 4764 3611 6760 5047 8418 12105 12106 12107 6757 12108 12109 4826 4766 3616 6769 12110 4871 4820 3607 4728 12111 12112 4767 12113 12114 5602 12115 12116 12117 12118 12119 4723 4722 3617 4726 5017 12120 4730 4818 12121 12122 4768 12123 4802 12124 4786 4803
282 8605 1571 293 6449 12125 12126 454 12127 3792 12128 204 411 12129 10471 9944 1302 1207 12130 447 12131 1430 408 1831 8783 12132 12133 5015 12134 7353 8634 8682 12135 10332 2895 1465 12136 3731 3021 12137 1775 12138 8779 12139 12140 2465 12141 1468 176 12142 2190 1583 12143 3071 205 2289 545 194 6589 290 8756 3466 1433 1790 550 551 7194 778 12144 1778 1782 1442 206 2304 814 2362 207 3266 9369 12145 10241 208 4466 1794 6395 553 809 11343 187 792 3267 369 11782 2108 192 6207 2097 1426 307 12146 1421 8189 3059 2461 12147 12148 160 8214 12149 9895 12150 6955 2266 12151 8593 5378 2474 7355 12152 12153 3820 1683 3171 3583 12154 1551 12155 12156 1624 3092 4575 12157 12158 8603 12159 6934 12160 3946 2283 654 714 1938 12161 12162 12163 8772 12164 6701 12165 12166 1553 12167 12168 12169 12170 12171 372 2359 6593 296 12172 12173 12174 6147 2352 8369 12175 12176 837 12177 4565 2263 2220 12178 8641 11365 2265 3522 621 8884 12179 12180 4519 1209 12181 12182 2067 5391 4574 12183 547 11379 8606 8648 2141 6972 12184 2252 8828 3022 12185 6954
283 12186 12187 12188 12189 12190 12191 12192 12193
284 8503 8452 9773 12194 8393 12195 5242 718 8451 12196 1530 12197 12198 722 5550 3811 1551 545 369 189 201 2301 814 4215
285 1993 628 12199 1962 1893 12200 6686 2996
286 1104 1105 6507 3323 2972 2019 12201 1051
287 6921 12202 978 3192 12203 12204 139 911 12205 12206 924 925 953
288 5691 11837 8473 1530 1550 1463 5372 1537 12207 12208
289 3900 3124 3875 4171 12209 12210 51 1711 991 12211 12212 4131 7965 566 4109 3841 1920 2525 3419 697 4479 2492 1910 12213
290 692 2972 997 12214 12215 3297 3832 12216 2965 12217 12218 192 6131 779 202
291 2278 3352 800 305 176 4525 545 369 12219 12220 8759 10241 1424 1779 2098 778 5299 1442 8584 293 2362 9450 189 206 812 5379
292 10859 2203 5491 4890 12221 4764 3616 4792 3618 3611 5017 5459 12222 5446 12223 3366 8154 12224 675 6937 12225
293 12226 7658 12227 3143 12228 9794 12229 3182 12230 3183 9748 12231 9785 9745 12232 12233 7767 9755 12234 12091 12235 12236 12237 9801 9773 7668 3173 7678 12238 9799 7652 12239 12240 12241 9797 12242 12243 12087 9800 10468 12244 9754 12245 7659 9746 12246 12247 10463 12248 12249 3145 12250 9814 12251 7715 9761 9809 7673 12252 12253 7725 12254
294 12255 12256 12257 12258 559 545 1208 2113 1433 1210 2899 5144 4606 5299 1781 1782 1442 2093 782 1448 1320 9373 3266 12145 7519 192 8763 2906 3465 1424 12259 3475 9783 9369 2112 196 2014 1355 12260 12261 1509 1500 12262 5198
295 4082 12263 2337 632 4175 870 3943 9302 3122 4139 12264 4122
296 8053 8646 12265 8795 4642 10333 12266 12267 12268 12269 7385 12270 316 4837 12271 12272 12273 8651 8603 12274 3070 8638 621 10303 12275 12276 12277 6624 6371 447 8578 12278 12279 8778 12280 208 1464 12281 523 8069 11380 12180 6560 12282 2323 12149 12283 296 12284 412 12285 12286 1469 12287 8730 8052 6975 8649 8672 8664 12288 12289 2772 12290 12291 12292 12293 6976 8792 12294 1613 8055 757 8797 12295 12296 11164 12297 6951 12298 8677 6204 12299 12300 12301 12302 2247 4585 6634 3044 8699 12303 8060 1594 12304 12305 2258 12306 442 8663 6559 8732 12307 12308 9359 3304 7484 12309 1811 11078 405 9397 12310 299 3794 8610 11139 9822 12311 3784 7353 9363 3094 8783 190 8731 8637 12312 12313 9360 12314 12315 410 197 12316 198 187 3103 1437 5426 6029 12317 12318 8884 12319 12320 4575 11382 4565 3084 6142 12321 12322 3048 4570 411 1620 781 12323 6963 4576 8595 6969 8799 8054 1428 12324 2464 8693 2361 2263 8682 8802 12325 2896 3300 2067 8894 9895 8608 12326 6980 2141 2362 12327 3732 8095 1601 9291
297 472 2924 5685 1509 2037 3981 3947 12328 839 9298 4151 5370 12329 12330 470 11513 12331 12332 7744 1047 1923 12333 4079 11771 12334 1924 3850 1062 2923 1755 297 805 205 12146 722 5134 821 4218 1926 12335 1928 561 12336
298 12337 10626 10627 10628 25 10658 3602 3599 43 18 8003 17 10637 8912 48 10654 8913 8940 4698 10638 12338 4686 12339 8929
299 12340 820 868 6485 10017 8257 12341 12342 12343 1034 9321 12344 9296 12345 12346 12347 12348 1056 11610 9340 10031 12349 12350 957 12351 12352 12353 953 947 9338 958 6507 3533 2923 12354 11604 912 1064 6937 992 666 12355 3951 4091 8252 1072 7897 6687
300 12356 12357 12358 12359 12360 12361 12362 12363 12364 12365 12366 12367 12368 12369 12370 12371 12372 12373 12374 3466 1433 2136 12375 206 623 12376 4607 12377 203 1789 814 2362 782 3097 3266 812 9370 12378 2081 369 192 12379 12380 199 293 3267 9375 307 370 283 12381 5172 12382 12383 12384 12385 12386 12387 12388 12389 12390 12391 12392
301 1352 229 1639 2624 1262 2505 216 2593 12393 2439 12394 12395 12396 10812 1355 829
302 12000 4974 5030 4962 4938 8344 4964 4946 4978 5338 11988 4959 4966 718 1537 4362 11837 12397 7611 3549 12398 12399 3544 3546 5224 5225 3551 3554 5230 4936 5226 4961 5453 4934 5234 5223 4950 4948 559 3767 12400 9778
303 8134 10638 12401 12402 12403 7997 3604 12404
304 3878 1722 1976 699 1724 12405 1076 1077 12406 12007 4220 2525 6520
305 2662 3152 7800 12407 4803 4734 12408 12409 2337 12410 12411 12412 12413 12414 12415 7471 7814 12416
306 2558 12417 12418 1625 4294 7437 12419 7438 12420 2193 12421 6895 12422 4598 2565 9260 9258 12423 12424 12425 12426 6957 2599 6889 9256 7682
307 4244 7317 12427 12428 12429 12430 12431 7316 12432 12433 12434 12435
308 8802 2263 2251 3024 5386 301 398 291 1582 277 192 810 2894 2121 553 528 12436 194 295 12437 12299 12128
309 978 4380 9531 8095 12438 1169 12439 171
310 9778 3551 12440 5452 5250 2525 12441 12442 12443 12444 2337 718 12445 12446 6118 12447 5077 12448 8364 12449 12450 3552
311 5557 9978 10936 12451 978 2203 12452 5459 10943 10116 12453 11666 11241 5532 5450 10220 6423 12454 12455 12456 12457 12458 12459
312 2797 9314 6475 6489 9725 9340 1100 9727 6456
313 8408 5179 1282 5173 1492 1284 8393 637 7265 12460 2533 2011 8968 7102 829 9222 12461 12462 12463 12464 9439 12465 9964 5588 12466 4909 12467 4858 5492 11795 8381 4242 2332 4908 4906 11846 12468 4859 7454 6768 12469 2337 12470 1010 2976 3020 12471 12472 8406 3583 5429 251 12473 5368 12474 12475 12476 5204 12477 12478 8441 12479 8836 12480 5176 5370 8396 12481 12482 1502 1498 12483 1277 12484 12485 12486 12487 1520 12488 12489 12490 1521 12491 12492 5188 5198 12493 12494 8264 12495 1018 12496 12497 1501 1500 8486 1493 12498 3800 5174 12499 3171 12500 12501 12502 3820 9871 4996 254 12503 12504 253 12505 8444 1488 12506 12507 279 10322 12508 4994 8548 8547 8491 12509 4208 724 12510 723 12511 12512 3423 559 6139 12513 12514 200 812 545 9383 277 12144 767 764 302 7199 621 2092 2071 1425 12515 1789 8742 553 296 292 8157 8746 3765 1421 11116 8756 1433 3465 196 619 3138 369 189 304 290 12377 1478 12516 4461 301 4215 329 1428 2108 192 12517 12518 1021 12519 12520 12521 12522 8095 1538 5195 3814 1017 12523 2656 12524 12525 12526 11607 12527 12528 2220 1546 12529 5142 3817
314 6423 1334 12530 4905 12531 3892 2525 3901 4430 12532 4911 714 12533 12534 838 8341 12535 2680 573 2959 12536 3352 11515 11765 7952 3195 1841 10419 12537
315 12538 8673 307 51 1611 4656 198 4654 2362 757 12539 1553 1594 454 12540 7417 2317 2141 1207 1617 12541 6712 4599 7982 12542 12543 3793 373 2149 12544 12545 3739 6929 2473 5378 296 2264 12546 8299 12547 6204 9610 805 765 1464 2343 766 12548 978 11955 3082 6618 4624 186 12549 8879 2461 5412 2310 4519 8065 8682 2262 12550 8896 12551 7364 12552 9396 12553 529 3059 3041 310 12149 12554 12296 12555 12556 12557 1624 2318 5423 12558
316 691 12559 12560 12561 2935 3980 12562 9718 12563 1828 731 12564 2282 11528 12565 10589 2964 12566 819 1912 1713 12567 12568 3533 3874 894 12569 12570 5328 141 1978 12571 9889 3879 12572 1816 12573 1863 11757 12574 11753 4338 3983 1842 6520 12575 2283 12576 3201 1870 9266 12577 2403 12578 8242 2962 10607 2930 2944 12579 601 1076 4107 4106 2961 654 1858 744 11513 12580 11763 4901 12581 12582 12583 4080 8311 722 689 12584 1037 3880 1935 461 2957 2412 2337 1609 12585 3190 4164 7633 1029 11557 2404 704 1970 1751 12586 1107 9338 3350 609 8329 600 470 12587 6685 3977 1755 12588 1741 1923 11527 8015 12589 12590 12591 11609 12592 8275 12593 945 3838 9480 466 2947 921 10050 12594 3607 12595 12596 4046 3925 12597 12598 3348 882 1771
317 10170 11068 1644 1183 12599 2501 1302 504 506 10487 12600 10519 518 165 12601 12602 498 12603 12604 12605 507 12606 10506 12607 211 12608 6262 6341 2449 2486 1665 128 129 7085 12609 4592 1307 1701 12610 1292
318 8076 61 66 54 56 55 64 62
319 12611 12612 12613 2662 12462 9216 2533 12614
320 3380 1955 917 3830 12615 718 12616 12617 1483 3586 3801 256 12618 257 258 1526 1513 12619 8475 10953 12620 12621 12622 12329 12623 1502 4678 9793 4342 12624 3800 3413 12625 12626 12627 12628 12629 3006 12630 1684 1685 12631 12632 8500 12633 8451 8548 12634 4327 3187 6061 3190 12635 5545 8546 1504 1509 12636 12637 5685 5198 12638 1494 1500 12639 12640 1493 12641 8514 12642 12643 12644 1284 12645 12646 12647 12648 11084 6733 12649 1309 3817 12650 12651 8498 5202 5168 12652 12653 8474 12654 12655 12656 12657 9465 3819 722 7948 571 12658 7939 4075 1819 870 1842
321 4386 128 129 3747 12659 2629 2599 1596 2431 12660 1804 12661 8038 8209 8246 12662 12663 8037 4392 12664 2469 12665 12666 3115 9100 12667 2575 1415 12668 8205 12669 12670 12671 12672 8208 12673 12674 1156 160
322 12675 12676 11929 12677 8707 12678 12679 8718 11914 12680 11923 11920 12681
323 7937 3886 1878 3870 7936 7935 3377 7490 7952 744 12682 12683 691 1890 10035 12005 11753 12684 11480 3366 11473 8321 3857 4776 469 917 571 153 944 3351 6853 2924 11130 12685 4411 12686 12687 12688 1903 12689 6459 1930 747 746 6849 1940 1745 2524 881 1995 2525 7265 12460 2055 3154 4409 4407 5446 6494 12690 12691 12692 577 12693 12694 1843 2365 12695 2372 12696 12697 1767 11754 2994 12698 1929 3131 3867 4003 3015 2402 1857 1848 1847 1845 12699 12700 3871 3914 12701 7491 12702 937 12703 1714 12704 12705 632 2934 2944 12706 12707 870 1842 1818 12708 12709 7258 6086 12710 839 840 565 1077 1076 12711 1771 8152 12712 12713 12714 12715 12716 4087 12717 1901 4160 12718 2046 593 2287 2038 2033 2034 2393 2637 6751 4111 1067 591 2283 2980 10433 583 12719 3185 7637 6851 10609 12720 12721 12722 916 12723 4071 12724 1879 594 2530 1872 1906 12559 12725 1933 12726 3885 10038
324 5430 2651 1015 4327 1314 12727 1811 2401 2525 5133 8979 12728 12729 12730 12731 9480
325 2692 12732 12733 812 9962 5703 192 6833 779 800 619 305
326 2786 12734 3195 12735 12736 12737 4347 948 10018 9472 914 1039 3357 10027 1085 12738 1967 1950 12739 10013 12740 12741 12742 1084 12743 931 1057 10010 12744 12345 738 12745 705 12746 12747 12748 12749 3832 12217 9319 12750 12751 12752 12753 12754 4166 12755 878 12756 12757 12758 9734 12759 4231 9733 10618 4170 4167 4165 12760 4169 4168 4143 12761 12762 12763 12764 12765 12766 12767 12768 2636 12769 6658 736 727 12770 4148 12771 1031 12772 11443 12773 12774 843 12775 12776 12777 12778 12779 12780 9339 12781 8841 12782 11441 12783 12346 9318 12784 12785 12347 12786 12787 12788 12789 12790 11444 6499 12791 6487 12792 12793 12794 1774 976 837 12795 7908 12796 12797 12798 12799 12800 12801 9305 12802 12803 12804 2001 12805 12806 2002 12807 12808 12809 9230 1627 12810 2007 12811 6056 9231 832 5508 9308 9205 833 2006 9306 2005 12812 12813 2352 12814 7340 12815 12816 2022 2004 2009 12817 2008 12818 12819 2021 12820 12821 12822 12823 12824 2972 12825 12826 12827 12828 12829 983 3385 10026 984 912 12830 12831 12832 6471 12833 12834 12835 12836 701 646 12837 12838 12839 12840 12841 12842 12843 12844 12845 12846 12847 12848 12849 12850 12851 12852 12853 12854 12855 12856 12857 12858 12859 739 12860 12861 12862 12863 12864 12216 12865 3196 12866 12867 12868 3352 10591 12869 12870 12871 6052 12872 885 12873 12874 4030 12875 6503 6502 12876 4031 6501 4145 4032 12877 12878 12879 12880 12881 9316 12882 12883 12884 12885 12886 12887 12888 12889 12890 2635 12532 12891 12892 2056 12893 12894 642 12895 12896 12897 12898 12899 7135 2843 2849 2753 2659
327 2924 12900 9926 1829 2954 8152 3838 4117 701 554 2958 11468 12901 11542 1933 3899 737 8341 4116 9458 3323 1870 6524 12567 4026 632 2531 3559 12902 1076 4011 566 1836 12903 2404 4080 9443 2399 820 592 4083 1772 6846 2926 2937 3377 12591 600 2380 12693 2637 729 12683 2942 2396 5058 873 9442 573 473 1876 991 8262 818 2952
328 7612 12904 12905 12906 12907 12908 12909 12910 12911 12912 12913 12914 12915 12916 4757 12917 6755 12918 12919 12920 12921 7649 12922 12923 12924 4756 8532 850 1800 12925 12926 12927 12928
329 275 7428 12929 11577 11585 12930 12931 1650 8388 4997 7309 12932 12933 2548 2522 3542 3541 1292 1212 12934 4373 128 129 12935 4254 1538 6509 3899 944 3851 8305 2681 3349 465 989 475 12936 1962 1933 12937 1067 1853 1852 1851 1850 1848 1847 1849 1855 1845 1857 1846 821 12938 12939 12940 4319 4321 4246 545 1443 9369 2083 12941 369 1433 1780 206 187 10241 12376 10274 4606 619 814 208 782 189 12314 196 10265 1555 3266 787 192 1424 788 3475 2906 9783 3465 552 11344 307 306 1574 767 4525 205 2060 12942 12943 12944 1493 283 3231 12945 12946 12947 12948 12949 12950 12429 3191 3323 714 3261 12951 12952 4994 247 1609 2929 12953 12954 8240 4236 12955 12956 12957 12958 3152 12959 1800 12960 2337 51 4256 4261 12961 274 12962 12963 466 917 12332 991 1938 571 673 674 675 4186 676 677 678 679 680 681 682 683 684 685 686 1843 687
330 1976 3120 3846 12964 593 3833 12965 880 732 2945 2961 10594 609 1824 3308 1029 879 4001 3992 3995 3990 3997 4000 3996 12966 12967 12968 3849 12969 1874 12970 12971 3955 12972 666 2405 12973 3392 708 2960 3297 4137 12974 12975 12537 637 6754 12976 3152 2677 3857 3957 632 3987 12977 12978 3234 12979 12980 3998 12981 12982 3378 602 3956 12983 3128 12984 12985 873 2937 2283 2380 4218 12986
331 820 702 1922 1919 1921 465 475 915 3871 3352 12987 9273 12775 12988 3323 4138 592 2278 2936 12989 10035 4054 12990 3925 3920 4053 1078 12991 12559 4088 1844 1843 3944 7936 1762 587 583 1910 691 12992
332 12993 12994 12995 4687 8133 8134 12996 12997
333 12998 978 2739 2972 832 1627 274 722 6053 2990 12999 2971 1537 12340 4198 4684 48 3598 8906 13000 598 7459 7993 13001 8150
334 13002 13003 8901 13004 11671 8929 10644 13005 13006 13007 13008 13009 13010 13011 13012 13013 13014 13015 13016 11672 13017 13018 13019 13020 48 4687 13021 1554 316 2343 557 2472 2319 7417
335 13022 13023 13024 13025 13026 13027 13028 12993 13029 13030 13031 13032 13033 13034 5173 13035 5430 5432 1502 5172 13036 13037 13038 13039
336 1684 559 192 5887 2359 372 369 2090 775
337 7440 13040 13041 7333 13042 7334 13043 7332 13044
338 13004 13045 19 13046 8931 4684 8936 10661
339 6077 2414 2397 1755 13047 13048 13049 13050
340 1284 1502 11449 9980 10789 10209 10171 13051 10224 10102 10743 10189 10103 11800 13052 10165 5553 10122 13053 10123 11806 9978 12162 13054 12147 10516 13055 13056 13057 10106 13058 10188 10907 10092 13059 11452 13060 10193 10176 10208 13061 10787 13062 11230 11418 5560 11430 10904 5536 11254 10918 13063 10127 13064 10943 10912 13065 13066 13067 13068 13069 3544 13070 5079 4952 13071 13072 12013 3553 3554 11052 13073 3549 5246 13074 13075 718 11267 5469 9215 2009 2026 1628 13076 2019 822 837 5541 10734 10203 13077 5470 13078 1327 1331 13079 10819 13080 11728 9945 13081 13082 13083 13084 13085 10908 13086 2201 10932 13087 5538 10172 13088 13089 2162 13090 128 375 2203 283
341 7454 13091 13092 2337 9432 632 2415 747 2525
342 11868 11457 11458 11913 13093 13094 13095 11885 570 2314 10826 11018 3012 9901 11911 11906 13096 13097 1537 3565 456 11912 4645 13098 10934 2200 11240 160 13099 13100 13101 13102 13103 13104 13105 13106 13107 2220
343 13108 13109 13110 12905 2274 2055 7457 13111 13112 13113 13114 12201 13115 13116 12912 12947 2337 4524
344 1195 1212 2545 13117 3642 1233 1302 1182 2595 1183 1203 13118
345 5430 8402 5368 1500 13119 1546 13120 13121 13122 13123 1506 4994
346 13124 13125 12851 12855 2786 9316 12742 739 6640 1467 2250 13126 13127 13128 12138 1428 13129 208 13130 4565 6625 2251 12273 8773 5423 13131 13132 13133 11373 12169 8828 5887 12184 13134 9359 13135 12180 2136 2485 10338 6825 4458 205 13136 372 1574 2305 12163 13137 9365 13138 13139 3099 458 13140 8805 12296 13141 13142 13143 13144 13145 547 10379 553 1586 2153 11698 1831 1795 2319 12554 12149 13146 9355 4577 1466 12177 12270 6934 186 176 538 13147 5775 6932 6037 9773 13148 1811 559 194 546 13149 187 410 13150 11705 13151 13152 12277 11709 324 13153 13154 6929 13155 409 2888 8290 1578 3090 13156 8774 13157 398 3106 437 12325 13158 2526 6372 4623 6946 6947 13159 13160 3097 3028 13161
347 4026 1096 11102 13162 2414 473 937 2995 6076 8543 2404 652 13163 13164 4077 156 651 13165 3555 881 819 12901 7758 8305 3879 13166 13167 3141 1843 3974 11099 1076 702 13168 13169 4039 13170 893 1937 13171 1748 13172 9234 13173 13174 9223 9213 13175 13176 9235 13177 13178 4003 2040 13179 3252 9428 2957 13180 13181 13182 2274 872 13183 860 865 13184 10966 141 4136 3370 3297 1829 13185 2355 13186 13187 13188 13189 13190 13191 13192 155 3933 2963 3308 11079 2380 4063 3122 2383 12537 1709 654 2959 2324 3422 302 2305 805 775 12146 3300 814 209 194 293 792 189 559 2493 13193 7953 3263 3559 13194 13195 3914 1745 2283 13196 2030 3912 13197 4082 7940 4091 566 1933 2033 1893 1970 4099 1771 722 13198
348 6739 10998 10983 6010 83 563 4057 3252 8906 13199 13200 2930 4131 13201 12406 13202 888 2387 846 456 6260 2186 4596 1149 13203 160 2406 2926 13091 9775 2525 13204 9332 11484 747 13205 13206 3883 4132 12745 2960 1755 868 13207 1739 1753 865 1899 13208 9923 1772 13209 821 206 13210 301 545 293 760 13211 13212 187 189 805 1779 6823 208 2065 767 4609 13213 1782 13214 290 1552 3133 619 2111 2078 794 1437 792 12144 1553 192 3475 800 795 761 307 559 571 2395 2971 13215 3834 1842 2396 1937 1902 13216 3871 4063 2273 13217 870 3830 6524 13218 2281 2937 10611 3558 2401 653 13219 2676 12717 3154 2667
349 12442 11792 13220 12904 13221 7806 7798 13222 13223 13224 7823 13225 13226 13227 13228 7802 7807 13229 13230 13231 13232 13233 13234 13235 7676 13236 13237 13238 13239 13240 8537 2337 13241 13242 12926 13243 13244 2328 13245 13246 2336 13109 13247 13248 3606 13249 12055 4735 12046 13250 13251 6921 13252 10955 13253 12948 13254 13255 7742 12909
350 456 3545 13256 13257 3547 718 2555 2172 9035 3503 3621 9034 13258 3481 9146 13259 1296 1288 3490 8889 3526 3445 13260 2553 9011 160 3501 12673 13261 4477 9032 3498 6562 9246
351 4198 3591 13262 13263 13264 13265 13266 13267 13268 13269 13270 12340 13271 13272 7546
352 13273 13274 11725 280 5279 3799 2010 13275 13276 5430 13277 276 5181 13278 13279 13280 13281 3816 13282 13283 13284 13285 3807 13286 13287 835 13288 1355 2011 9223 9214 13289 837 3191 10830 13290 13291 13292 13293 1023 5170 8264 1017 1020 9997 13294 3572 3581 2656 5278 13295 12497 13296 13297 13298 13299
353 13300 3545 13257 4577 12320 2464 829 1998 835 13301 5515 1354 1627 13302 2190 13303 8779 4576 8595 1467 8611 13304 8599 546 622 2267 3036 8729 13305 4575 12151 8734 13306 9395 9396 5015 2067 13307 8828 13308 3736 3303 9393 6962 13309 12150 11078 5490 13310 3945 13311 6814 10225 8728 8653 8683 8686 8610 3077 4579 8579 13312 3133 9360 13313 13314 208 1320 369 302 1779 305 779 1780 1439 5887 202 1442 556 192 6131 3227 4522 12145 4466 792 176 11782 8763 195 3475 13315 8068 6449 13316 12308 2252 13317 6581 6582 13318 13319 10323 3785 13320 11382 10303 409 3768 13321 6633 10236 13322 6976 8829 13323 203 13324 8685 8664 12143 5410 2302 13325 1466 8772 12180 12295 8663 8795 10300 3795 2525 838 7745 1963 7758 714 596 1880 669 2396 473 3200 8252 1730 3323 476 6688 5221 2924 1821 733 4189 141 9366 11363 13326 13327 8679 2361 13328 8054 8730 13329 437 5415 316 318 314 315 319 3090 13330 13132 12554 12155 4570 8802 13331 8050 12282 6560 6559 13332 6029 8064 13333 10376 8669 2189 3739 3031 5006 13334 8652 8773 6625 458 13335 2162 5778 9822 11178 7978 13336 9615 2323 3464 2089 13337 1594 10280 13338 7353 13339 13340
354 13341 13342 13343 13344 13345 13346 13347 3591 8113 13348 13349 13350 13351 13352
355 3158 13353 13354 13355 13356 13357 13358 13359 7728 13360 3168 7652 13361 1811 722 13362 12483 13363 5433
356 13364 13365 13366 8096 13367 13368 13369 12457 13370 3537 13371 13372 12458 13373 7985 800 293 307 553 779 195 192 306
357 2032 2963 6739 4015 4011 10983 6010 563 8152 3845 11099 699 2930 4068 3983 615 2958 13374 1984 4009 600 469 13375 1910 585 3351 3849 566 2186 1149 13203 160 13376 865 13377 13091 9775 3297 1755 1824 3912 3910 13206 13378 3371 13379 3846 2960 1947 3252 13380 1899 13381 1820 206 13210 545 293 13211 13212 187 189 6131 6558 12144 1779 1780 208 2065 4609 12548 192 204 1552 10265 619 3266 1437 792 4841 6833 800 795 307 559 4122 13382 13383 1875 6511 1902 13216 13384 9465 13385 8388 13386 6081 8544 2273 7259 13217 3830 13387 870 13218 2937 3558 2401 653
358 11758 3899 707 4112 13388 881 3974 882 13389 3941 3907 3840 635 554 4121 3898 1868 13390 13391 13392 3895 3896 1965 11499 11469 13393 13206 4003 2637 3264 3235 1045 893 13394 13395 13396 5047 6760 4871 5017 4736 4721 3611 4830 4785 7993 13397 4806 1915 473 2405 2407 3217 13398 13399 1717 593 2282 917 6042 1959 2924 4776 2273 2274 2275 1910 13400 989 8269 1930 602 11471 9261 13401 7261 13402 1867 12978 3236 2380 3861 3263 10442 586 2034 11515 6492 12534 714 1938 3396 3390 13403 13404 953 13405 13406 4144 1773 13407 10610 13408 7050 13409 13410 13411 5112 5113 13412 13413 13414 9282 4430 2365 7954 1875 13415 11561 11520 3935 13217 13416 13417 747 12682 10443 583 3313 13418 744 580 4153 13419 591 4775 1735 13420 4159 712 3328 7948 3883 13421 4706 6751 13422 13423 1941 7953 13424 1843 1877 13425 1933 12724 4111 7478 4812 4746 7865 13426 7872 7867 7871 13427 13112 13428 13429 13430 4543 13431 1929 887 11511 594 13432 13433 2394 4778 4777 2413 13434 627 11870 12983 3854 13435 10431 603 13436 2393 10445 870 7947 1946 13437 13438 13439 13440 13441 472 3831 13442 4128 2956 13443 2491 13444 7494 12537 13445 3297 13446 13447 1820 879 13448 3863 3348 2952 587 13449 1039 1040 958 913 3920 13450 2276 571 3247 13451 991 2406 13192 13452 13453 13454 13455 13456
359 1463 13457 6079 9465 2976 8560 13458 13459 7666 1582 8157 800 1210 1431 1432 13460 2097 553 297 805 2093 10234 3227 1267 13461 13462 13463 13464 1531 13465 2950 8544 980 10961 10958 1217 13466 13467 1485 1532 13120
360 746 1934 10953 1264 13468 2337 3878 13469 13470 707 1726 5172 13471 1500 3586 13472 13473 6082 3171 13474 13475 13476 13477 13478 13479 1515 5134 1549 13480 5430 13481 13482 10027 7452 4132 13483 2365 13484 733 4214 13485 6142 1577 192 2893 2104 6130 761 13486 8452 13487 13488 13047 13489 13490 13491 13492 13493 13494 13495 5198 12493 13496 13497 5199 1537 823 829 2533 13498 13499 837 744 1937 990 7948 7903 10436 611 1764 571 13500 745 1930 13501 11870 6520 1933 748 2639 461 8453 5946 1546 8489 13502 13503 5209 13504 1511 13505 13506 13507 13508 13509 2647 13510 13511 13512 13513 13514 13515 8451 8543 1551 2404 12703 8332 11871 1938 9325 3946 13516 1939 13517 13518 3131 3328 1970 13519 7643 13520 13521 2525 1853 13522 4053 1513
361 424 413 5791 9082 5817 5819 229 3638 326 2161 5840 339 6870 13523 3112 10697 13524 10683 1450 13525 1671 9683 13526 6266 13527 9173 1344 5842 13528 13529 5147 6426 5699 4493 332 8822 9150 6271 10808 129 128 7561 13530 5800 526 5848 1292 1157 6881 8233 8232 13531 6425 2631 2554 2430 9132 2364 4533 9142 13532 11029 13533 1242 13534 2662 11972 13535 13536 11072 378 9154 8286 1403 7445 436 9693 10674 13537 3448 3774 1405 456 6032 13538 7461 160 2163
362 13539 4341 7149 2843 7255 2813 13540 13541 2817 13542 7126 4557 3281 13543 638 5087 13544 5100 13545 3256
363 13546 3544 3552 3551 2673 5565 6652 8574 8573 9869 8576 7983 13547 6736 13548 13549 2976 722 3584 3585 13550 12637 3326 5172 755 653 628 656 664 659 670 671 742 571 672 674 675 676 677 678 679 680 681 682 683 684 685 686 688 687 997 842 994 658 1066 5715 5716 3192 13551 13552 4731 4735 13553 13554 6922 13555 7505 13556 13557 13558 13559 12036 13560 13561 13562 6993 538 776 779 292 553 800 13563 187 192 794 3472 8767 307 795 9962 559 8328 13564 13565 644 643 4378 13566 13567 1165 8203 654 13568 543 542 1083 934 1855 3928 673 13569 11440 9446 9270 6687 13570 1843 8148 1762 2278 12332 1933 13571 1755 13572 1718 8252 13573 13574 10694 8364 11455 13575 242 13576 7325 13577 13578 2219 2218
364 13546 13579 5343 13560 6993 538 776 553 2065 2127 192 2058 9369 796 13563 13580 815 794 3472 8767 292 795 9962 208 800 5715 13564 643 4378 13566 13581 13567 1165 8203 13582 3011 654 13568 728 542 878 1083 13573 934 1855 3928 13583 13584 13585 11789 675 9446 673 6687 13570 1843 1762 2278 1772 12332 1933 13571 13572 1755 13586 13574 5917 1718 8252 7947 13587 2525 4950 8364 4930 13588 718 13589 13590 11455 13578 2219 2218 11454 7784 5716 13561 13591 2673 8577 5192 4598 13592 7417 13593 13594 13595 13596 310
365 13597 13598 6521 13599 1537 13600 1314 1284 9378 13601 2263 13602 2190 13603 13604 13605 13606 12169 12184 200
366 5524 10895 10843 13607 13608 11261 2203 3191 2971 13609 1217 1806 11220 13610 10923 1807 13611 11206 10583 10888
367 13612 9894 13613 13614 13615 13616 9906 9875 13617 13618 7977 3541 1632 11659 13619 13620 13621 13622 13623 13624 13625 9854 13626 11665 13627 13628 13629 9891 13630 13631 13632 13633 13634 13635 13636 13637 13638 9882 13639 13640 13641 4646 2417 11139 13642 529 1317 3281 3283 3261 283 642 9189 7287 2829 7129 13643 6408
368 13644 5450 13645 5482 5532 11206 11261 11944 13646 5552 10899 10900 10943 10116 13647 13648 11266 11666 5551 10787 10575 5458 11649 5483 13649 6452 5162 5473 11233 11240 11412 13650 5212 5501 5459 13651 13652 11248 12452 160 13653 13654 11293 5475 5476 10547 13655 13656 10915 10721 12453 5485 13657
369 283 13658 13659 13660 13661 13662 7415 13663 1537 1283 2670 13664 718 13665 13666 13667
370 481 2510 13668 2265 1472 13669 3024 4610 13670 13671 13672 8890 546 7465 3268 622 2247 296 13673 13674 540 7777 12519 13675 9635 9775 1674 13676 13677 13678 4521 2071 13679 4572 13680 6611 5636 13681 13322 310 334 6558 559 2307 13682 13683 6648 9491 529 13684 13685 233
371 959 1897 13686 2525 997 468 4545 3120 7649 620 2319 619 5144 192 2460 779 4353 202 2078 2315 2674 187 6448 559
372 7346 11877 13687 11888 11458 10817 13688 13689 10824 13690 3171 1500 13691 1537 13692 13693 13694 13695 11887 13696 13697 13698 13699 11903 1996 13700 6055 828 8966 13701 12822 6455 51 7911 10821 7418 13702 13703 13704 13705 13706 4276 245 243 12528 2220 13707 13708 13709 13710
373 7507 11018 13711 10986 8378 8085 8087 11036 1213 103 11940 120 7498 106 108 8349 7514 7506 563 5965 13712 7538 13713 13714 6010 94 8358 5985 10187 1307 10159 10534 5527 7532 13715 10957 1456 13716 8359 8361 7597 88 11024 7504 6007 5990 7582 8081 13717 77 8109 123 8351 10961 13718 10993
374 6659 13719 6661 6662 8096 6663 13720 6859 13721 6860 1165 979 978 4207 12340 4194 13722 4198 559 4608 189 1320 8760 814 6821
375 11574 13723 2525 4095 13724 13725 13726 5729 4208 4289 141 13727 13728 13729 13730 1662 13731 13732
376 3545 3546 3549 3547 7758 1821 714 628 1758
377 13 11670 11669 13733 13734 13735 10650 10649 8936 48 47 13736 13737 11667 4698 8903 13018 13738 12995 13739 8917 37 13740 8944 10642 8912 10637 13741 13742 3408 13743 4692 8931 8133 13744 13745 13746 3591 13747 13748 3598 18 4686 4696 4699
378 13749 3759 9877 13750 13751 13752 170 513 511 5359 6696 7977 13753 192 1784 779 1440 1320 3474 1783 2304 1446 9373 6948 13754 5887 13563 8289 9783 2134 805 13755
379 13756 13757 7290 2881 12084 13758 13759 13760 4340 2695 5082 13761
380 10150 11390 10175 10122 10731 5450 11269 13762 10152 13763 10289 13764 13644 11414 10719 10095 10158 13765 11277 5553 11241 5447 13766 10124 5458 11802 10123 13767 5536 5561 5557 10717 5532 10923 10551 11388 11452 13768 11245 2203 718 456 10897 11257 5503
381 11977 13769 9950 9661 9669 13770 13771 980 7056 5808 8247 9508 13772 13773 13774 13775 13776 9463 7052 7042 3399 9960 13777 13778 13779 13780 13781 8195 13782 5111 13783 4198 13784 6991 13785 7018 13786 9279
382 8581 5767 13787 13788 2474 4623 11113 8580 4289 283 447 13789 13790 316 318 10469 317 314 315 1560 1558 319 4832 8583 194 13791 8896 13792 2291 13793 12156 3094 13794 3039 3787 3305 6801 2369 13795 3196 4714 13796 2357 2372 3218 837 778 7365 13797 13798 13799 13800 8777 13801 8296 12557 13802 4622 13803 1574 2907 13804 13805 13806 13807 13808 13809 9851 1624 6799 12920 13810 13811 13812 13813 13814 4906 4908 13815 4242 11795 13816 4905 13817 2337 7831 7830 6142 5421 13818 13819 2323 5015 13820 13682 132 5764 7195 7196 13821 13822 13823 13824 13825 6717 13826 13827 4526 13828 13829 13830 13831 13832 12266 8700 2263 6624 13833 8639 8657 8691 7362 13834 8785
383 13835 2339 13836 3427 2800 1500 13837 1684 1685 2933 13838 3412 1283 1519 1509 1511 5138 13839 2883 838 12583 602 12576 2278 2033 2035 3380 7634 3297 3243 744 11091 2276 1849 1857 1851 2396 13840 2525 13841
384 7803 7806 13842 13843 3881 11657 13844 13845 2667 3935 13846 12711 1076 1077 929 1906 3839 928 1078 8308 12559 6687 13847 13848 12914 4409 4407 3272 13849 254
385 13850 4685 50 13851 13852 13853 37 1718 13854 3603 13855 13856 13857 13858 13859 13860 13861
386 7612 6768 4242 4462 2248 6577 558 805 2247 1571 3079 13862 3765 1555 301 1428 2249 13863 12394 13864 2432 1811 13865 13866 13867 7287 13868 716 10606 13869 13758 13870
387 2067 3084 620 205 3732 1466 405 1493 13871 1509 5172 8618 141 3154 2337 3019 4640 13683 623 1331 13872 13873 3746 1306 453 8676 13874 190 12295 1594 200 8578 3731 552 295 13875 3784 13876 5767 7379 450 7390 8897 8052 8664 13877 6384 1468 3101 2220 8986 4990 13878 13042 13879 12943 13880 13881 10330 8095 12138 3737 1831 2099 2466 3089 2346 536 11374 13882 1467 13883 13884 8787 5565 4598 13885 13886 8574 6712 8573 13887 13888 10389 3791 13157 12150 6814 13889 9642 1553 318 317 315 314 319 10469 765 5300 13890 4579 13891 13892 8623 6978 13893 13894 13895 2247 13896 194 2483 549 300 8770 13897 6942 12180 1469 2474 12288 8788 13898 8295 13899 5766 13900 13901 13902 9381 6968 13903 13904 7353 13905 13154 9655 5403 6378 13906 1436 1437 2310 5770 13907 12178 13908 13909 13910 13911 3077 13131 208 6966 13912 4570 5465 1811 8699 8636 8802 12149 13332 6971 8795 8628 1795 197 2089 8047 8792 8608 8066 6946 9396 6950 3070 2633 128 2489 1636 13913 5830 5577 2258 2251 13914 8651 1613 4573 6624 6625 8773 8625 13915 10280 5636
388 1040 667 692 2525 1060 13916 13917 13918 1072 1076 13919 12485 2693 13920 13921
389 13922 13923 2248 6577 1441 12139 3019 559 160 13688 1165 11456 13924 13925 1242 8214 3271 6088 456 12012 11898 13926 13927 13928 13929 13930 11880 10826 13931 13932 11905 2314 13933 6110 829 11458 13934 1236 13935 875 2493 13936 1685 13937 11459 13938 11040 13939 11891 13940 11460 11461 11896 3012
390 10711 13941 5214 11259 10125 5551 9986 10130 13762 10892 10102 11303 11264 11260 13610 5451 10152 5488 10115 13942 5501 10579 11814 13943 2203 10840 10128 13944 5486 10140 13945 13053 13650 5447 13611 5553 10159 5531 13946 10782 10156 11233 1306 545 13947 2081 622 547 13948 4523 2895 1784 2097 2886 192 13949 2096 5144 1783 2252 1792 195 1320 2058 1331 13950 10735 10851 10903 10106 10586 10116 10787 11226 5528 11230 10551
391 12985 13206 2396 1923 13951 821 13952 13953 13954 3216 13955
392 13956 13957 13958 13959 13960 13961 13962 13963 13964 13965 966 1816 13966 10049 1740
393 12916 13967 13968 13969 13224 13970 1538 12118 5602 13971 13972 13973 13974 13975 13976 13813 13977 13978 13979 13980 13981 13982 13983 13984 13985 13986 13987 4242 13988 9964 13989 13990 13991 7993 13992 13993 13994 13995 13996 13997 141 10694 13998 2976 12919 2337 4858 13999 14000 14001 14002 14003 2372 3251 2928 13380 1843 12697 14004 14005 8254 142 3878 1762 2278 1977 13418 14006 14007 4753 14008 14009 14010 14011 14012 13112 14013 14014 14015 14016 14017 14018 14019 14020 4757 12925 14021 12113 14022 14023 1910 1930 917 3946 8321 7948 571 611 1933 2287 465 2396 733 11537 1938 468 14024 1881 14025 3945 714 14026 593 1717 14027 14028 14029 14030 14031 7641 14032 7453 14033 14034 14035 14036 14037 14038 14039 14040 7875 7644 14041 14042 5604 14043 14044 14045 8519 14046 14047 14048 14049 7840 14050 2332 14051 14052
394 14053 14054 14055 4531 9418 14056 14057 14058 14059 5854 14060 5958 5931 5925 5918 5850 14061 14062 14063 14064 14065 14066 14067 14068 14069 5903 14070 5939 5162 14071 14072 6451 14073 14074 14075 14076 5952 9414 14077 14078 14079 14080 5940 5959 2442 14081 14082 14083 14084 2444 5905 14085 14086 14087 14088 14089 14090 14091 14092 14093 14094 14095 14096 14097 14098 14099 14100 14101 5910 5926 14102 14103 14104 14105 14106 5853 14107 5897 11737 14108 14109 14110 14111 14112 13260 5876 14113 14114 14115 14116
395 14117 1638 2170 2163 6564 1665 6542 14118 456 14119 14120 6904 2536 14121 13523 1679 14122 13533 14123 10682 11228
396 311 5006 6571 14124 5770 7379 14125 14126 14127 12096 5296 1129 381 3644 7363 14128 6591 2474 3767 447 14129 14130 14131 1441 405 10358 5408 14132 3044 404 2467 1436 6595 1319 4646 1612 14133 14134 14135 12139 14136 9943 3096 2323 14137 6804 10471 14138 8895 10345 9348 7356 14139 3268 2896 451 14140 14141 4650 11702 3034 3103 3058 1593 6602 1615 1565 1422 1566 1571 10235 1574 8290 12133 538 767 1475 1553 203 1477 1476 4843 316 189 14142 14143 14144 13792 14145 14146 11699 3765 9868 14147 9691 14148 14149 6930 453 8785 8894 9895 13537 8214 14150 13642 12152 9937 3522 14151 14152 12538 4579 14153 1613 14154 14155 14156 14157 7691 2477 1692 9041 2588 9040 9039 14158 2191 14159 9045 9498 9042 7686 7657 7692 7689 7688 7684 7685 2496 6366 7096 7690 1663 14160 14161 12667 14162 7359 450 759 9375 11123 14163 2258 8675 8657 10339 8676 6625 8671 524 14164 2359 300 6596 4629 10366 801 9946 14165 14166 2251 14167 8640 14168 13862 8639 8700 10340 8728 8653 8645 14169 14170 4627 13787 13159 14171 14172 14173 1292 5614 14174 1293 2592 1350 2232 2626 8224 1151 1325 10673 9043 2593 9044 12668 9140 14175 12308 14176 6702 14177 14178 14179 14180 14181 14182 14183 9942 14184 8897 14185 14186 13788 14187 14188 14189 9939 3742 14190 14191 14192 14193 8790 13338 11139 14194 3032 1832 14195 12558 3073 14196 14197 5381 3787 13793 14198 14199 14200 3794 1579 14201 7393 10373 2306 5643 14202 11713 14203 14204 11126 14205 14206 5767 5768 14207 13306 14208 6419 5641 14209 14210 14211 14212 14213 5642 14214 14215 6375 14216 2903 10390 2062 8605 1468 12321 14217 8692 13909 13755 9628 14218 14219 14220 9290 9642 3048 5771 2567 14221 13832 14222 9938 14223 3095 12324 12325 8805 14224 14225 8893 13797 14226 14227 14228 8637 5393 14229 1614 5401 400 772 10368 6588 14230 3469 14231 2242 14232 2303 529 6570 10232 7362 14233 7419 778 1471 3766 14234 3071 1589 14235 7372 14236 14237 14238 14239 5640 14240 14241 12296 6802 14242 5383 14243 14244 7518 14245 12180 10387 8804 5777 8643 9293 14246 14247 305 803 10238 807 12140 13907 8695 8634 8694 8656 14248 13894 14249 14250 6392 6644 11337 9948 14251 11142 14252 14253 14254 5008 4498 14255 14256 4519 449 14257 14258 13158 14259 10258 8206 9640 14260 4623 14261 14262 14263 14264 6618 7378 3031 6717 14265 5305 14266 4497 14267 6343 14268 11652 2597 14269 14270 8699 13157 1618 3059 13923 3033 9528 14271 14272 1611 9638 14273 14274 3764 10356 14275 13826 14276 14277 2539 1452 14278 5577 4640 9941 1428 14279 6581 11146 14280 4622 8644 14281 1207 9913 559 10239 756 2346 9826 2319 12144 766 764 437 2510 523 763 1706 2132 14282 14283 14284 14285 5769 14286 322 14287 331 2065 3047 2067 14288 5615 14289 10247 12312 14290 14291 5211 14292 13751 14293 14294 14295 14296 8016 14297 14298 330 14299 2263 4610 14300 1198 14301 8279 4363 1224 14302 1218 1352 14303 8951 6215 7693 7204 14304
397 11072 559 1797 2310 558 1421 5172 5544 14305 14306 14307 14308 14309 14310 10806 14311 1504 5138 14312 14313 14314 6075
398 8405 14315 722 8394 14316 9465 1504 14317 12641 3416 3417 3415 8567 14318 14319 1483 14320 14321 14322 14323 8979 14324 8833 5198 3411 14325 14326 14327 12195 8457 14328 14329 14330 13780 3399 5115 9280 5114 3404 9463
399 14331 13592 14332 12542 14333 14334 7416 14335 14336 14337 14338 14175 437 298 2146 1319 14339 3302 14340 978 980
400 1505 14341 14342 5371 2668 14343 1499 14344 5945 14345 14346
401 4341 14347 2717 5113 9281 14348 5114 9660 11858 14349 14350 10694 2736 14351 7256 7176 14352 14353 14354 14355 12613 2932 5141 8028 14356 1685 14317 8544 2739 12612 14357 14358 2659 2806 2740 2700 7251 2813 14359 14312 14360 14309 2931 14361 7283 14362 7142 7303 13868 14363 14364 12733 14365 14366 2706 14367 14368 14369 7301 4558 14370 2812 2735 2875 14371 14372 3402 5115 3399 2775 7182 14373 5120 14374 14375 14376 14377 14378 2866 14379 7235 14380 14381 2525 642 7130 3248 14382 7173 14383 14384 14385 3171 722 14386 14387 2776 5100 2777 2868 7282 3126 9465 14388 2729
402 3145 7725 12248 3144 14389 14390 14391 4543 10462 7782 10459 14392 14393 9748 12806 14394
403 21 13740 10642 13046 13045 14395 11672 13016 14396 13739 8917 10643 14397 14398 10657 7963 4699 10622
404 287 12472 14399 14400 9898 11907 14401 14402 11566 11564 14403 9900 9901 13697 11562 11913 14404 14405 10825 7343 11569 14406 14407 14408 14409 13924 13940 13687 14410 14411 14412 10828 11873 3012 722 3008 1551 12526 12471 9439 12512 12509 14413 14414 9990 14415 14416 14417 14418 14419 8265 14420 1010 1026 1025 14421 14422 1023 14423 14424 14425 14426 9993 11897 3579 14427 14428 14429 9994 14430 14431 14432 1018 1019 14433 12496 12497 9436 11719 14434 3577 14435 3576 14436
405 13930 14437 1551 14438 14439 14322 722 14440 5174 14441 1549 12998 1533 1436 1437 203
406 2972 10017 12196 1755 728 14442 2965 2679 14443 4229 14444 14445 2056 3533 1086 14446 10030 992 2525 10607 14447 4024 14448 12342 2990 14449 14450 2373 14451 666 14452 9723 14453 14454 3250 9730 1061 14455 12225 13188 14456 9724 10009 14457 10616 956
407 3223 838 637 2055 1811 4207 14458 14459 7434 242 4329 4328 4327 3189 3190 6074 5546 5545 14460 14461 14462 14463 14464 6068 3187 6073 6047 6044 718 7912 11473 11474 7492 1934 593 474 465 3869 14465 14466 3870 1935 1714 14467 7489 11472 6855 7493 468 461 3202 463 14468 3192 12023 12022 4408 3154 4409 14469 3004 3207 1003 973 155 14470 14471 14472 1002 2929 14473 1066 14474 14475 755 1906 14476 14477 14478 3520 14479 2396 1930 917 714 1933 4038 12837
408 386 367 5836 14480 6434 1363 14481 4355 6432 1364 1366 1368 1367 1418 1376 1377 1374 1390 1389 1388 1387 1385 1384 1383 1386 1379 1378 1372 1370 1371 1373 1381 1382 1375 4393 1380 1365 1369 14482 5314 14483 10787 10701 14484 9077 14485 6431 6429 5778 5072 4449 4367 6422 385 426 428 6194 14486 2603 6257 2161 5806 6307 11829 4354 5073 10810 14487 6420 5802 5785 6541 1288 3702 14488 14489 5324 14490 4359 8266 11236 4635 9156 4356 8954 5821 1411 337 3627 441 14491 14492 9148 6562 6430 9097 378 9138 9137 6272 3457 6291 3540 14493 9143 4587 131 419 9092 6285 6259 9084 4374 5071 9076 2174 4528 8162 8161 2555 1112 14494 5061 6883 6261 418 5849 6568 6305 434 5148 347 333 1339 1809 14495 1344 14496 5795 5756 4371 6569 5846 3719 213 1402 326 6555 14497 5699 4358 5799 1302 3704 5323 9075 2478 336 14498 14499 14500 8816 14501 379 9133 2260 6347 5787 342 5782
409 14502 605 7618 1816 7760 12937 3195 1739 3884 14503 838 12939 3191 8197 11730 11905 13937 14504 13925 13708 11458 11906 11913 14505 14506 14507 14508 14509 14510 1029 3978 1755 14511 13572 14512 1729 2935 594 4142 4006 3118 2525 11454 14513 2219 11607
410 739 12742 14514 3118 2525 7572 14515 14516 208 4522 9359 3133 14517 14518 1568 14519 5015 10338 3739 14520 773 5882 6605 6825 14521 296 3059 5887 3136 805 9383 370 10379 3040 5382 2907 11493 7664 7730 14522 7747 7697 14523 5574 10376
411 14524 14525 14526 14527 14528 14529 14530 14531 14532 14533 14534 14535 14536 14537 14538 14539 14540 14541 14542 14543 14544 14545 14546 14547 14548 14549 14550 14551 14552 8198 14553 14554 14555 14556 14557 14558 14559 14560 14561 14562 14563 7893 14564 14565 14566 14567 14568 14569 14570 14571 14572 14573 14574 14575 14576 14577 14578 14579 6026 14580 14581 14582 14583 14584 14585 14586 14587 14588
412 13924 11459 1811 2662 1538 14589 9470 9992 1024 945 3389 1836 4746 13428 5584 4858 894 7659 3175 1023 3956 600 1042 3328 1799 12687 2931 14388 14590 3815 7465 697 141 4218 3128 14591 3313 283 14592 14593 9863 14594 14514 1765 4095 3986 14595 14596 8127 2926 9335 2957 915 14597 14598 2350 14599 14600 3920 4204 4131 1891 1945 3950 605 14601 4061 820 13470 2664 12582 12695 11588 1654 3941 3247 707 14511 14602 2964 893 4350 14603 1841 14604 8139 14605 3297 2958 221 1149 5697 14606 14607 14608 3329 14609 1971 2952 3929 3216 8128 3243 3901 4149 844 13383 3352 1728 991 3250 3846 1029 13423 2525 1609 1509 679 4540 1933
413 10421 10425 10426 14610 10453 10429 10454 1965 14611
414 1724 1010 1488 14612 1549 1463 1509 256 257 1526 258 12491 1513 1523 1524 14613 13509 8832 8386 1525 12618 2647 13493 3187
415 1755 2524 13769 9951 9664 5115 3407 3399 3400 3401 3403 3405 3406 2534 2797 14614
416 14615 14616 14617 14618 12364 14619 12369 14620 14621 14622 14623 14624 14625 14626 12370 14627 14628 12360 14629 14630 12359 14631 14632
417 6671 1165 51 978 14633 3587 4289 821 6677 624 2676 1046 3206 1739 12200 6687 877 1032 1755 2406 709 11752 4134 1818 1933 1042 669 944 14634 7936 6688 744 6694 1762 729 2666 12688 628 1092 14635 3392 1764 468 7666 2387 7633 13569 11771
418 14636 3607 4818 5017 3618 4820 4785 4793 4859 14637 13972 14638 4764 12114 14639 14640
419 8235 3532 972 2731 14641 2754 2750 7283 2773 2709 14642 13414 6536 14643 7046 7016 14644 9954 14645 14646 14647 3486 141 9502 14648 14649 8266 7012 14650 14651 4429 14652 14653 7007 11493 575 1811 14654 9663 7011 14655 978 14656 3402 3401 14371 9678 9671 14657 5112 3405 14658 12764 14659 14660 4433 9281 9275 7019 14661 9951 11986 9504 14662 3191 7048 9673 9665 14663 11977 7030 14664 9277 10590 9669 7021 13781 13783 14665 14666 14667 13775 14668 3399 14669 12080 14670 11149 1843 14671 2380 3297 7492 1909 1771 14672 14607 14673 473 9480 11438 3404 14674 14675 14676 13769 5111 9463 9955 14677 14678 3403 9957 7029
420 283 9830 6372 2242 8225 14592 9844 14679 11652 524 9626 5398 14680 14681 14682 9886 5158 5154 5156 5159 4586 12131 14683 13635 14684 3782 2510 2190 3420 3074 13826 5454 5217 14685 4636 9880 14686 10236 4622 14687 14688 14689 2363 14690 722 14691 1273 1548 13458 1551 14692 14693 13617 14694 9877 9290
421 882 881 2525 14695 6539 3486 3010 3206 14696 14697 3955 2409 14698 1076 14699 14700 2045 12564 10597 2365 594 2917 1905 600 744 10048 7745 991 2388 5058 585 14603 14701 597 14670 2043
422 1728 1879 11108 14466 13375 3882 1811 2436 2437 2432 14702 2405 7948 605 3970 2409 1963 11657 1869 11771 7961 14696 4349 3555 877 470 917 1825 689 2281 2930 3960 2391 2387 1729 1964 2490 2926 585 12331 1928 991 870 869 696 12213 2969 691 651 2396 751 10598 3838 11484 2943 10048
423 14703 4779 1735 12583 10035 5221 572 14704 3902 690 3887 12684 11772 4097 2402 571 7493 600 4102 1894 14705 14706 14699 14700 919 4159 14707 594 13207 14708 3934 2981 14709 1980 564 1837 14710 2387 2391 7637 3314 2953 14711 14712 1879 686 14713 14714 1767 12867 841 469 1881 3955 1928 2396 1941 751 4156 4054 4049 1853 14715 14716 14717 14718 1962 917 14670 14719 4136 691 863 3349 463 2286 1938 14720 14721 10048 7745 1067 14722 6042 1955 9924 7958 11106 4055 689 1852 1850 1845 4046 14723 713 714 12533 8337 12534 11484 3899 653 14724 6852 1981 6511 14725 14726 14727 14471 14728 719 14729 718 13065 141 2525 11090 8121 12588 1755 887 1930 696 10417 1843 14730 7948 2406 12902 14026 14731 14696 1979 944 3914 628 12990 3925 7947 699 8261 14732 12332 14733 744 602 1964 3118 580 3952 14734 10598 11101 624
424 14735 3606 14736 14737 714 13557 158 14738 14739 12053 12101 14740 14741 14742 2337 14743 14744
425 7129 2735 6835 2881 7127 7294 7289 14745
426 14746 3281 14747 14748 14749 14750 14751 14752 14753 14754 14755 14756 14757 14758 13543 3288 14759 14760
427 4347 961 1085 9338 957 9725 2923 1038 4343 2385 14761 1771 1072 12342 9722 1086 14762 7758 14763 14764 9730 14765 14766 9278 677 2965 1082 14767 10017 12355 14456 2992 12225 10027 14768 958 14769 2985 870 14449 14770 14771 14772 3376
428 6847 14773 3331 3969 11467 2276 14774 14775
429 8617 14776 8063 1468 621 14338 6449 2323 3732 9630 4579 8620 14777 4576 12554 6947 9364 8623 13142 8068 12265 8067 2190 14778 2903 454 8670 5775 6969 14779 546 3029 8691 538
430 2524 6739 14780 1906 12711 31 14781 14782 14783 13200 14784 14785 13199 14786 8906 3974 14787 11099 2490 14788 564 12406 13919 2387 888 565 600 881 573 7935 12199 4910 14789 14790 14791 13230 2283 571 2406 2926 2944 466 11757 2401 1755 3251 2925 12841 734 3912 2957 13202 13208 1772 3872 141 176 619 553 208 206 302 545 2319 3099 759 1706 2065 2900 805 1785 2078 2086 2085 290 3133 13156 189 3464 4523 192 3227 1792 796 369 764 301 767 12144 1437 772 792 187 13563 305 1795 1831 194 794 307 8767 814 13580 795 3136 800 195 559 837 1844 3911 14792 14793 12726 4111 6751 2637 1740 917 3131 655 1902 3831 14603 4036 3196 4122 3122 628 2415 7944 14794 13377 14795 14796 11845 2337 8305 9924 470 3328 1925 2676 4011 11753 1965 543 4704 14797 7462 14798 14799 1855 868 9441 3830 9440 3873 8341 865 653 3118 14800 6677 3559 8331 1463 14801 14802 14803 14804 14805 14806 12640 5436 1483 8564 14807 5198 1513 14808 1488 6079 1492 1500 1277
431 14809 14810 14811 14812 545 14813 14814 1790 1792 195 14815 2264 2082 805 14816 307 192 6135 2249 14817
432 14818 1142 6425 2191 2428 1597 2578 4450 1302 14819 5313 6424 9130 14820 1187 184 129 2421 9140 2453 14821 8216 10683 5291 14822 14823 1691 9171 10754 5153 5152 224 225 6278 10671 6366 1674 7685 9043 7686 1255 2454 6359 1026 14824 11627 13299 13274 1022 13273 5282 10005 14825 3572 14826 14827 3581 3569 5283 280 14828 3810 14829 1496 1498 5370 10953 14830 3586 3801 14831 1509 14832 5171 14833 5131 1663 6888 6909 10753 6346 11027 1287 8994 9242 6365 14834 1198 1224 4546 1699 5657 1325 2478 1335 1218 1352 14835 14156 14836 4360 1321 14837 3448 3668 1293 14157 6905 14838 14839 14840 1240 1451 6878 1348 14841 14842 14843
433 9751 7465 2266 4845 306 14844 10453 283 2432 14845 9879 6817 3231 14846 14847 14848 14849 14850 14851 7467 14852 7473 14853 14854 14855 14856 14857 3192 6142 3097 14858 13580 4353 4460 195 5649 5995 2127 9740 10243 550 3027 2096 2083 3468 6833 324 805 1786 2093 784 3071 10273 369 1792 2482 13754 196 6448 187 792 198 2319 192 545 553 4526 2068 8157 2484 302 307 814 194 206 1831 811 305 370 412 559 6151 141 14859 837 835 8968 14860 14861 10612 14862 9458 1082 2913 943 912 913 14863 561
434 14864 4920 172 174 4919 4918 4921 14865 14866 14867 14868 14869 14870 493 10519 14871 10508 161 10524 10489 14872 10473 12600 10475 10487 14873 10505 5359 14874 162 14875 10486 10488 500 10477 501 10476 10485 9770 14876 10479 495 12602 502 10490 14877 14878 14879 14880 5599 494 496 10525 10478 10482 10480 14881 10481 5358 503 10484 10492 10483 10491
435 14096 11737 14882 5166 11884 5924 14883 2870 11843 12613 14884 14885 14886 14887 14888 3213 3212 1010 1023 14889 14890 14891 14892 5940 14081 5926 14893 14894 14895 14095 14896 5913 9414 4376 179 1262 5705 7122 1292 1183 235 129 2298 6230 1398 1395 3621 2522 160 14897 14898 14899 14115 5876 14900 5958 11885 5938 5929 14901 14902 977 14903 14904 5951 14905 14906 14084 14907 5879 14908 5875 14909 14910 5173 5430 14911 5687 14912 14913 12261 14914 14915 10595 598 2911 3318 14916 14917 821 155 14918 14919 14920 1939 917 1930 714 991 554 4783 1854 13522 7894 3945 1067 14921 14076 5918 14922 14923 14091 14089 14924 5907 14087 14113 1933 461 7758 14925 13484 14926 2378 1850 1857 1853 870 654 7956 7452 1821 2525 14927 14928 5896 5921 14083 13275 4207 14929 1500 13035 1281 5138 5202 13260 14930 14092 14931 14932 11948
436 14933 14934 9258 14935 14936 14937 14938 14939 14940 14941 2237 9245 14942 14943 14944 14945 14946 14947 14948 14949 9496 1701 14950 14951 14952 1639 14953 1810 2599 2448 14954 14955 5356 5357 5654 14956 14957 7097 12420 14958 14959 14960 6687 673 14961 244
437 14962 3230 14963 5021 3184 14964 4805 14965 14966 14967 6747 7203 10868 12031 14968 14969 14970 4856 4733 830 14971 14972 9211 14973 14974 14975 6784 14976 14977 14978 14979 849 850 14980 6480 4771 14981 14982 14983 14984 9223 827 14985 5508 832 12806 14986 14011 14987 7455 5019 3362 14988 2332 9967 13975 3154 11719 1811 14989 14990 12070 4702 9199 14991 14992 14993 7640 4865 4744 14994 4861 14995 4894 4892 14996 4893 14997 14998 3192 4895 4891 4796 829 14999 12462 6748 15000 7649 2337 15001 5023 12221 15002 3152
438 7778 1870 1885 14591 7967 6847 14603 12706 4040 15003 15004 571 10045 11095 6520 2278 15005 1894 3240 15006 4087 15007 12583 3332 4127 4029 2954 3925 1853 7637 3355 2280 6843 14597 2042 4104
439 15008 15009 15010 4289 12756 735 1712 11468 3315 15011 470 542 878 12533 714 1032 8337 15012 1937 12534 611 12332 10417 687 12224 1933 7745 991 2055 1995 2525 5172 15013 15014 15015 12616 13120 15016 12640 250 12655 15017 15018 15019
440 5387 1620 4627 3073 1601 1478 1610 621 781 545 3071 199 8756 9781 1433 192 1780 1442 2362 15020 7388 4463 1793 369 187 2895 553 10337 5428 5391 2291 3025 1029 2396 699 15021 3915 1843 8337 8252 4646 3105 4623 2249 2474 15022 403 1552 15023 3072 2346 529 5421 2189 4657
441 892 3118 4124 8309 2944 751 2398 12406 3830 4350 14503 12332 3974 744 10049 15024 8537 3191 8356 5972 7595 15025 15026 15027 15028 14788 2354 4132 3122 991 3195 4338 4541 12559 628 15029 1933 1970 1899 15030 4066 3252 8190 15031 15032 15033 2337 838 2356 8353 15034 1753 1897 15035 1708 870 1824
442 654 3908 2944 1816 1875 3307 10047 3892 3838 1758 13380 3306
443 15036 11326 6003 7504 15037 5967 15038 15039 11348 11333 10998 10961 9410 15040 10999 15041 11347 9009 11965 8996 15042 11000 9006 10997 11349 8997 11350
444 3915 7791 15043 15044 12086 15045 9773 7680 11866 10467 12240 12251 15046 12087 7768 7725 7670 15047 7713 7673 13354 15048 10460 11078 15049 15050 15051 15052 1357 14806 12621 10463 9799 4542 8537 9755 3937 2493 7728 7708 559 775 2484 812 207 791 2086 2136 3420 307 4522 192 11688 2062 1792 1790 800 189 187 369
445 3352 1965 4203 3120 15053 1096 3861 15054 4113 15055 15056 1960 3857 3001 3000 2401 15057 1867 13407 11657 3373 13436 1995 15058 1277 1509 12624 12501 12484 4671 13048 8836 14321 14323 8388 6733 1267 1463 15059 15060 8444 1274 15061 7120 12618 15062 1266 3810 15063 3409 15064 2932
446 1652 5731 5732 5734 5729 15065 13726 283 15066 8613 2322 14338 8797 9357 15067
447 1829 11545 2967 576 6484 998 13696 283 2922 2407 4090 14730 591 9723 15068 2947 655 469 1959 2282 1958 10441 525 2324 10035 12006 746 2637 2348 4001 14609 15069 1728 6478 3313 4203 15070 691 4119 1878 6522 15071 1938 1839 15072 11553 13469 13311 10607 2373 4740 1800 8537 13444 2274 3835 10040 1755 730 3122 15073 3131 8306 3899 819 624 4122 2281 1842 3918 673 3365 2047 722 4224 8503 1551 1795 2464 6029 206 2150 7378 3919 990 1843 3386 9989 10616 2678 3826 1029 15074 15075 12716 15076 145 2993 15077 15078 855 1855 613 4411 12686 15079 1627 3323 11796 6740 3848 2961 15080 15081 821 15082 160 10376 15083 545 1208 1423 5650 195 4522 1433 369 15084 3096 805 6447 812 1782 5006 529 447 12146 8590 3266 4463 3420 792 187 4215 192 12144 3475 2465 15085 1601 2056 15086 8252 15087 8275 4030 15088 632 6677 8305 944 7633 15089 3974 12579 189 2365 2971 3012 718 3197 714 609 2492 14789 2337 15090 744 964 8112 571 945 11507 12694 707 1717 2854 1065 9273 15091 11556 11125 15092 3875 1027 7956 15093 817 3937 4091 15094 4219 6857 11476 6664 14510 8276 598 2404 14454 8128 8124 8337 3986 15095 8338 15096 9296 6507 14444 2992 9471 3243 4039 8151 15097 1831 13150 3021 8095 15098 1023 14445 4128 561 9458 3322 11797 2406 983 992 2283 15099 3263 2675 15100 3533 7458 1906 837 504 161 10524 165 10512 9770 170 12600 497 7605 978 15101 15102 156
448 3993 2348 3994 3366 3120 15103 3897 15104 1744 1993 13444 8302 4711 917 1707 12984 1106 915 2979 14670 5136 2283 12711 1076 12597 2964 4001 3995 15105 15106 3861 3920 12683 15107 4812 594 12726 2365 2373 11788 15108 15109 1897 15110 2403 12919 15111 15112 15113 12704 15114 6681 7935 1970 15115 4183 4181 15116 15117 2924 13204 15118 7750 15119 12578 12978 14701 15120 3989 12973 15121 10594 12331 1820 13206 3865 12868 15122 15123 6842 3152 2052 5112 15124 7647 7641 15125 14031 7643 15126 15127 12264 15128 2913 15129 15130 12988 4006 2963 566 3855 15131 15132 15133 11587 837 15134
449 15135 15136 1022 15137 15138 15139 15140 14378 12614 7155 4341 2766 15141 7129 15142 15143
450 15144 15145 6987 3534 1010 1165 15146 6454 13349 3572 1026 1025 15147 9470 15148 8429 15149 15150 15151 15152 10004 9436 15153 11719 11619 555 15154 11924 15155 15156 15157 7336 15158 15159 15160 1014 15161 1546 8464 286 3582 1022 15162 11624 15163 2026 2020 9215 837 51 15164 13299 15165 15166 15167 15168 15169 15170 15171 15172 15173 15174 15175 12519
451 15176 6662 15177 13369 13364 15178 15179 15180 15181 15182 15183 15184 12451 15185 8096 15186 15187 15188 15189 7985 545 2895 5703 1582 15190 1587 1706 14858 757 195 6650 293 305 622 778 192 1320 805 208 620 6446 553 794 766 187 189 2136 529 198 2319 15191 307
452 10091 10098 10745 10738 10746 5469 10737 10217 10739 10740 10218 10092 10744 10747 5470 10111 10094 10742 10115 5558 9982 9984 10544 9979 11389 10919 10284 10110 10743 10748 10741 10194 10185 10184 10545 10725 15192 10778 9985 10727 10726 10750 10777 10581 11435 10792 10116 15193 10547 5548 10850 11416 10932 10161 11414 10791 10788 15194 15195 10557 5503 11277 10950 11276 10709 10708 10890 10703 10927 10891 13765 10165 10762 10761 10117 11289 11408 5471 15196 15197 10113 11301 11302 11304 10945 10903 10096 10108 10173 11230 11232 11311 11395 10549 10926 10130 15198 10912 10541 10204 10202 10760 10097 10529 10223 11321 11651 15199 15200 13652 13651 15201 10831 10583 1331 1413 5499 10205 10181 10182
453 1115 1303 1632 2463 2495 179 1236 7831 1134 5670 8225 218 1164 178 15202 2192 3797 1302 7077 1179 1292 226 182 8537 3749 184 6232 185 15203 1322 1146 222 223 205 187 198 2127 200 201 203 206 207 209 2484 3074 14171 228 212 215 225 227 1257 7691 229 5671 5684 2174 5673 2489 236 6224 180 238 1636 1262 240 242 243 245 244 15204 11639 266 246 247 269
454 2314 837 1069 714 992 661 1034 4218 2396 839 11471 663 6477 464 1023 15205 7760 4118 11869 2525 1609 3012 10823 13687 15206 11913 15207 15016 15208 13043 13093 2215 2214 15209 2219
455 692 14701 15210 15211 3116 2525 15110 3002 12889 3316 956 12200 4231 9263 2415 10027 1031 15212 931 1076 15213 6685 1039 3140 12596 15214 4232 3370 10015
456 8336 571 3919 15215 14849 1755 14476 2337 13451 821 10607 4212 9303 1609 14005 12706 2676 2525 1023 15216
457 3139 1709 5058 11107 9322 9428 9341 609 15089 11093 11513 601 15217 2380 614 9442 15218 592 15219 696 605 4014 1993 15220 15221 8311 3942 632 10609 8152
458 15222 15223 1307 5445 9849 10108 2363 15224 3490 3778 8887 2203 15225 15226 12624 1509 5691 4362 1502 3800 1493 1508 15227 455 1292 545 8745 15228 2081 3463 199 553 15229 5144 9740 548 2319 1787 15230 775 551 778 369 192 2482 13213 3468 15231 761 814 782 4657 4656 15232 3227 2599 1690 15233 375 7077 15234 2210 128 129 4481 2622 4552 216 1695 141 4478 4186 876 2525 1811 2271 8266
459 8428 3326 722 15235 12595 4750 3882 1957 3971 14604 1710 4142 3972 1881 2038 15236 15237 1758 1964 2938 12080 9342 1077 1752 4160 1988 14788 3884 11482 3922 6841 3557 15238 2667 1076 6673 15239 3933 15240 15241 4037 13192 6478 1892 2964 2371 4020 3206 15242 15243 15244 3612 2365 2369 154 12560 566 3373 14600 3878 4034 6842 9343 9345 1965 7259 1814 15245 4411 15246 4003 2954 3252 1755 574 3918 2034 2405 15247 992 3328 1735 15248 893 141 553 4458 307 6589 15249 194 621 15250 559 160 1772 653 13179 15251 2388 874 9924 4106 15252 15253 15254 543 15255 1875 2354 15256 15257 821 2337 4543 13108 15258 15259 3231 4126 14512 699 14601 15260 2409 15261 15262 15263 9478 10087 718 12992 1973 1820 3352 15264 6674 15265 15132 11100 2917 628 2390 1891 1970 15266 877 11513 554 1969 15267 4125 15268 466 585 11099 2408 1825 4029 839 3354 15269 4338 1843 3250 15270 1910 1933 8015 1708 677 15075 15271 1952 476 15272
460 3903 14787 8124 15273 6867 4098 15274 15275 1743 13181 1813 881 11101 1961 15276
461 11326 48 15277 11333 1811 15278 1960 8334 15279 2972 837 283 54 8084 6003 11002 10971 2971 6999 10996 15280 11965 11000 15281 5172 9163 4673 9008 9005 11347 11350 8353 15040 11346 9007 4932 15282 11891 15283 718 11880 10989 15284 11351 11001 15036 15285 11966 10998 10997 9004 9009 11328 15286 15287 7582 15288 8996 6015 15289 7525 9006 5219 6011 2247 2136 205 559 6423 15037 11331 8352 3191 1217 11348 11330 15290 1306
462 893 4099 651 7129 2351 1546 15013 1504 8029 15291 8543 837 15292 12987 9440 7940 3359 1880 15293 3846 1977 15294 8534 15295 7873 4117 1854 15129 4214 15296 991 976 600 821 2380
463 12595 14008 15297 14044 4807 15298 4749 15299 13226 15300 15301 14639 15302 15303 4544 5604 15304 15305 12415 7865 15306 15258 12911 15307 15308 545 2324 2116 8757 4656 176 10241 15309 779 778 1589 791 192 10273 13754 557
464 2380 9432 4139 3123 3118 4140 4142 7939 670 3557 3558 3555 3556 4006 624 3559 3560 13379 671 6524 15310 15311 13163 15312 3961 3962 3314 15313 15314 3373 6847 14600 11513 11093 10037 15080 14696 7634 631 917 1959 1930 1933 5318 3366 3120 11754 1881 3964 2273 1910 3954 3313 629 583 1768 580 3866 2963 4149 4178 669 587 3830 3873 854 4015 4012
465 11967 12162 15315 15316 15317 5298 15318 15319 7406 15320 15321 12413 15322 7407 7405 15323 15324 11970 11969 11975 15325 15326 12920 8539 8542 8538 8540 15327 11972 11973 15328 4764 3611 4799 4787 6762 15329 15330 15331 15332 4769 15333 6763 4829 15334 6761 4820 4871 6760 4720 4736 3607 4818 8418 4729 5017 15335 6757 12108 8421 12109 8415 4738 2373 2337 8541 12409 15336 5515 13286 825 827 15337 15338 15339 834 15340 1358 2637 15341 3956 3200 3349 1933 1758 917 3199 6664 461 733 3198 714 468 1853 13522 1850 571 7943 2369 2368 2365 2372 2662 15342 1628 5507 2011 12810 822 835 9216 830 7209 15343 8367 15344
466 13524 5148 5832 3670 15345 427 430 426
467 1965 1072 3902 1029 9720 15346 2415 3833 7952 3017 2530 2380 2409 653 2924 4082 945 2281 2396 2051 3128 2057 369
468 14424 4207 978 6452 5162 15347 12616 1283 10952 15348 11615 15349 1014 1546 15147 51 15350
469 15351 15352 13008 13016 15353 15354 15355 15356 15357 15358 48 15359
470 6184 5172 1169 4957 7655 15360 852 4911 2337 12155 14216 8189 187 802 5380 15361 277 4514 3720 15362 212 180 8245 15363 8676 15364 12298 15365 5421 15366 3712 5701 1111 15367 15368 15369 1853 1850 3921 1857 1846 1845 1852 1851 1848 1847 1849 1855 1755 8269 8305 15370 571 15371 1994 11080 1292 4373 1775 2319 3304 1706 5389 6607 2417 7369 7365 1258 9105 2556 7105 4545 6221 3788 778 2252 1605 192 545 194 15372 1831 814 2473 8884 2088 1428 792 6593 3099 10376 3031 1209 15373 3107 189 305 412 6589 805 553 5887 15374 199 15375 206 8690 2251 203 6786 4536 1636 15376 2460 3030 1617 4565 15377 1191 8256 1236 178 9042 9249 7687 3538 2542 3719 15378 3638 1195 2560 4360 1302 11387 2616 15379 15380 456 11049 5225 1295 5622 2418 1325 15381 1257 229 6436 717 15382 215 15383 2263 4522 196 205 294 176 15384 3022 4622 3732 8778 1582 6111 1224 15385 6234 1321 642 7132 7287 7301 2840 15386 2870 15387 2757 2659 2731 3668 15388 15389 15390 15391 1219 8883 15392 2489 228 6246 1237 2554 1159 2536 2505 230 5612 1630 2478 5673 15393 8183 15394 1577
471 15395 14573 14528 14586 15396 15281 15397 14532 14572 15398 14529 15399 15400 15401 14567 7896 14524 15402
472 15403 2337 3261 3287 15404 15405 15406 3280 15407 15408 980 4378
473 2242 141 1654 12173 9691 2895 302 2075 3096 1320 398 6575 300 15409 15410 11702 2061 1797 5401 3794 4462 10250 3055 10245 10247 3792 7393 1576 1577 3134 1573 10337 10343 1574 1584 3136 1583 8289 1600 8657 6624 13674 4582 2263 2247 1578 1572 7419 8625 15411 523 15412 11142 2266 12538 5770 15413 14154 481 10351 10313 6963 6944 14288 3032 14244 14141 14148 15414 14209 8638 8637 8727 8619 15415 8601 6389 15416 3092 296 8796 15417 12295 6385 15418 4579 5766 2464 6029 3268 623 15419 1466 2256 4630 2511 774 765 8585 7366 7353 6626 12277 13159 8049 15420 6370 6371 8608 15421 6951 6602 1615 10352 1565 1422 12294 15422 1559 1560 315 317 314 4837 318 4833 316 4832 10370 319 15423 10373 1579 294 374 313 312 6604 15424 15425 14249 292 320 321 8288 15426 8290 8779 2474 12283 5386 6947 15427 15428 15429 15430 15431 15432 15433 4498 622 15434 3022 2136 305 3732
474 910 503 10492 1264 160 559 1320 206 545 4629 778
475 2396 472 839 2970 154 595 744 1741
476 1230 15435 11728 2624 15436 2642 15437 1307 2488 8888 1259 2195 15438 1242 15439 15440 718 2179 1196 3701 179 1674 15441 13776 3719 2232 3672 1663 15388 3686 1636 3456 2622 1695 2623 1453 2580 6245 1288 6236 7079 15442 1289 15443 1182 2627
477 13003 8912 8940 8936 15444 8133 15445 13735 15446 8135 15447 15448 13021 13018 8150 8937 13017 8900 14 15449 10626 15450 15451 15452
478 10007 5285 15453 15454 15455 6921 15456 15457 15458
479 4411 4707 9474 3843 3236 11095 1060 9720 1072 11758 3378 2350 3352 2337 9377 9375 208 2363 15459 13919 3196 3863 2372 917 10035 3235 15116 3991 692 4230 2274 2275 3998 13403 15460 15461 1053 3392 4111 6751 3857 15462 2405 15463 12006 4775 15464 6520 15465 15123 2491 1067 15466 15467 4003 2014 827 15468 832 15469 13302 1165 15470 13571 1755 15471 15472 8252 729 13166 1867 3238 3239 14611 893 3864 15411 15473 6382 545 1586 192 2319 1795 1831 199 10241 369 812 293 775 2100 15474 559 456 642 2365 142 4079 5135 11468 9432 15475 9430 15476 3384
480 15477 15478 10426 14846 15479 7473 14851 10429 14856 10423 10453 3614 15480 14860 9925 15481 15482 13487 5435 8486
481 1067 2337 15483 2416 14845 5666 13863 12395 15484 15485 978 10043 3974 2282 602 3328 6681 703 3899 14348 5112 9274 7068 15486 4430 7961 1080 2938 3873 860 1970 4151 5948 6821 559 893 15238 12564 4545 13204 2917 2957 2954 15005 1893 4062 2667 15487 7944 13867 3428 3419 573 14603 2959 15488
482 3876 1711 917 918 3890 8305 15489 3976 13840 3906 15490 3888 15491 3889 629 583 1913 1769 3954 15492 1914 1911 3313 15493 15494 7960 15088 3891 3964 15495 1871 11497 9432 1895 12717 1048 4023 15496 15497 1938
483 2230 15498 2237 1808 5655 11137 15499 1805 6239 8256 2425 1160 15500 1298 1195 8880 1296 8873 15501 15502 15503 2610 15504
484 5453 4938 12399 9778 4946 15505 9543 15506
485 6076 13664 2055 2337 571 637 2483 15507 13682 1599 2265 402 8308 1907 4136 3025 15508 2474 6631 4623 7831 15509 15510 1840 2924 15511 4047 3889 3122 1983 15512 623 5421 6916 2557 129 6900 6438 3950 9926 1984 15513 15514 14603 4011 893 566 3860 3841 5057 15515 3313 653 8153 999 51 15516 15517 15518 15519 15520 13342 15521 15522 5777 203 3048 10394 2266 2255 2635 2354 1757 729 1977 9793 4145 11103 2047 15523 5140 13599 1169 15524 15525 15526 1730 13486 187 7381 3092 7518 4627 3081 1620 14235 4116 12697 15527 15528 194 1209 3105 307 306 2289 1433 369 4609 814 550 2078 620 10274 2098 2065 323 206 3096 2096 13947 1780 6821 205 5379 397 3475 11688 3100 189 2473 3133 192 2247 806 2362 809 325 2895 802 797 811 3071 2902 6816 2032 991 1714 15529 696 12986 1884 9473 699 1878 5430 15530 15531 5172 8890
486 15532 9163 837 1355 15338 2023 832 2533 12462 12461 5593 4434 8968 2025 822 835 1629 1998 1354 1356 6057 5515 15533 15534 15535 825 5512 2017 2016 2013 2015 828 6055 15536 2022 1628 2011 2014 15537 829 827 2018 2019
487 15538 4510 3707 10742 9690 3642 5670 3687 4376 2488 11802 10702 10284 15539 15540 15541 10171 10918 2201 10839 10581 13078 1306 15542 3487 10090 11236 3431 6264 128 129 1292 15543 1331 10176 5555 10174 15544 11278 10156 11417 10155 13943 10919 5551 5488 10162 10096 11394 10130 10128 11435 5553 11304 11273 5457 5501 10091 15545 10219 5470 5560 11422 11433 13057 10933 13655 10153 13061 11224 10569 15546 10708 11405 5456 9239 5536 10102 10168 5538 10139 10717 10758 5534 15547 10180 10191 13098 10733 15548 10146 13056 10914 1242 1165 15549 3779 11652 5531 15550 1806 11811 5212 15551 11805 5487 11453 10095 10103 10112 15552 10539 9980 11420 10209 15553 10923 11432 4360 15554 15555 15556 15557 15558 5451 15559 10931 5528 15560 9933 1332 1333
488 15561 6070 6072 6063 15562 6062 6061 15563 15564 6066 15565 6064 15566 15567 15568 15569 15570 15571 2212 15572 15573 3190 15574 15575 3188 14462 15576 14463 14461 14464 15577 3232 15578 15579 15580 15581 14311 13466 15582 15583 15584 15585 6069 6065 3186 15586 6074 15587 4327 15588 4932 4929 15589 15590 15591 15592 15593 7917 7916 719 15594 7912 15595 15596 7918 14728 7915 720 718 15597 7913 11053 7339 7919 4969 15598 4968 15599 6047 6027 6044 15600 15601 9752 9751 10806 10804 15602 13998 15603 15604 15605 15606 10694 15607 15608 2054 15609 8183 15610 15611 6059 6058 15612 15613 15614 15615 15616 15018 15617 15618 13881 248 15619 15620 3189 15621 15622 15623 15624 3209 15625 15626 15627 250 6077 15628 3171 6078 15629 15630 4994 8493 8492 8513 1546 8430 8547 8406 5195 9871 15631 11719 12472
489 5760 4371 1405 3448 340 5781 14480 5314
490 3858 3195 12583 15632 4706 3864 605 15633 13378 8141 15634 1898 1901 11546 11549 9262 1897 1896 4072 845 1889 8142 15312 15635 3229 15636 1862 1867 4114 4115 4003 2637 733 1713 3945 991 3206 3947 15637 1933 4129 4157 4160 3887 4158 2287 474 916 15638 14465 1959 593 4130 918 12710 1714 1711 2282 4154 3251 15639 7929 2412 15640 2413 15641 6751 10047 15642 15643 8341 11760 15644 13388 13432 3861 3860 3862 13434 3863 13391 7933 15645 15646 15647 14857 15648 10426 14844 15649 15650 15651 2403 15116 12970 2369 15652 4776 591 1740 1954 1940 464 12722 15653 11473 1921 1919 1899 4071 1890 15654 4065 4066 4067 4070 4068 1900 4064 4069 15655 4073 846 15656 753 11547 13390 15657 15658 3391 15659 1917 15660 1916 1915 15661 583 1914 1912 15662 13433 15054 15663 15664 1770 15665 15666 15667 1875 953
491 995 1083 950 914 9989 923 10029 3956 15668 14746 15669 14760 14756 14747 3284 15670 15671 15672 3002 283 15673 15674 15675 455 1317 1004 6482 3017 9333 15676 15677 12596 15678 15679 14595 10011 15680 1040 6685 958 15681 3356 10599 10020 943 1058 15682 983 15255 9736 8255 964 986 987 1103 10615 12988 1974 15683 1035 15684 12598 15079 1075 15685 15686 12873 951 949 6471 10024 1038 10517 15687 947 15688 1065 15689 14862 15690 14449 4343 10008 1104 941 15691 12571 3333 957 10616 6499 6459 15692 12743 15693 2525 9715 10031 11605 9739 15694 15695 1031 1082 561 9472 15696 2983 15697 2992 14456 1041 1073 1061
492 1106 10030 3830 4350 4178 1941 1931 1940 699 3873
493 15698 15699 14615 15700 15701 15702 15703 15704 15705 14628 15706 15707 15708 15709 15710 15711 15712 15713
494 5671 222 2188 559 5975 5967 7496 123 105 68 118 104 6016 107 15714 3191 1169 165 718 11056
495 10417 10412 968 673 934 1844 9925 13919 1087 14787 2357 2365 15715 15716
496 15717 15718 9950 14371 13781 13414 15719 2432 2662 14645 9952 7021 7016 15720 14652 9673 13772 13770 7027 14646 14654 9671 5112 15721 15722 13771 7018 7054 9667 7064 15723 15724 4561 3401 15725 9664 9678 9957 9280 14667 4429 15726 7056 13774 9951 9665 5111 9679 3399 15727 15728 13783 4430 722 15729 3409 15730 12198 15731 7013 14677 3402 5115
497 3559 3561 2415 15732 13167 15733 3223 4010 1825 654 15734 3910 15735 6839 2929 991 697 9302 4204 2387 1077 5135 13571 1842 8141 671 10056 15736 1096 1708 14717 15313 1798 4116 4006 670 874 4339 15737 6492 4338 4031 3128 6511 14514 3911 693 6052 11770 13208 4123 4122 1896 1817 1824 15738 15739 15740 6520 3322 12590 1971 3958 743 9458 3940 1875 4140 554 10020 2936 3915 8305 11469 893 15741 4195 3261 3849 1085 15742 4144 6751 15651 15494 1742 15472 4053 11091 637 15743 10420 2917 892 11475 2396 4141 3123 15744 3121 4032 4057 2273 3972 873 1869 992 2926 651 865 468 15681 15745 15746 15747 15748 5438 15749 10694 6820 6406 10689 978 15750 11685 4217 731 15218 15751 5688 15752 12154 1537 1627 12798 829 15753 15754 574 3555 870 7948 9423 15755 15137 15756 3419 8255 2491 3349 15757 1682 8543 15310 15758 2390 1870 3557 3107 294 374 132 1613 5766 3134 323 291 2567 192 2289 808 620 202 2097 814 4656 6444 373 176 4525 9383 301 369 307 189 205 6574 11334 11335 3080 3031 13333 2344 2253 10269 558 2322 6617 6616 10375 7366 765 2511 774 770 769 768 772 559 15759 9623 306 806 3420 8156 807 2362 206 1586 552 805 187 9819 194 3422 9625 803 2138 766 296 305 6151 141 4149 12743 585 614 2524 15760 929 15761 15762 1710 14595 6677 12596 4076 958 820 3356 473 601 696 9298 1059 605 943 14607 9332 15763 10011 15764 677 15765
498 15766 15767 13748 7963 15768 15769 15770 3599 15771 15772 24 3602 25 15773 8003 18 17 15774 15775 13 12337 10628 15776 10648 15777 36 35 4700 15778 9 15779 15780 3597 10622 15781 8001 10659 10660 22 38 37 21 13740 19 26 27 44 15782 34 10619 15783 15784 15785 8149 15786 15787 10656 3604 3591 13009 15788 15789 15790 15791 3600 8929 43 4696 10657 4699 10655 10654 15792 15793 8133 8920 11667 4698 13736 8903 15794 12339 15795 8922 15796 8914 23 10652 15797 8913 13742 8936 4692 13744 13746 15798 15701 15799 15800 15801 15802 14 15803 3601 15804 8924 15805 15806 13737 15807 15808 15809 15810 15811 8904 15812 15813 12338 15814 15815 4693 4694 13734 15816 15817 12995 13738 8925 15 15818 16 15819 4685 15820 15821 15822 4695 15823 50 15824 15825 15826 15827 15828 15829 7998 15830 15831 15832 13741 15833 15834 15835 4697 47 10649 8004 49 13743 15836 15837 15838 15839 15840 10647 15841 15842 8116 8909 4691 15843 15844 12404 15845 15846 13002 15847 15848 15849 15850 15851 8941 15852 15853 15854 15855 15856 15857 8919 15858 15859 3598 8931 13745 15860 15861 48 15862 15863 4686 15864
499 3967 751 4050 14702 4046 15865 12334 1853 1852 1851 1850 1848 1847 1855 1849 1857 1845 1846 469 571 2406 15866 1854 1904 11439 1922 15867 468 917 3932 15868 15869 2396 2973 15870 7967 2380 3194 2282 12565 2355 7936 11110 654 1821 3252 1933 15871 2924 14663 5113 5114 5112 2880 7145 15872 2877 12733 7288 15873 7211 15874 2773 2745 2659 15875 15876 7169 2692 2782 15877 9426
500 558 6577 6702 6638 5691 15878 8396 15879 722 6630 306 6087 6377 2242 458 9895 5771 8590 307 9619 559 5423 296 6380 6381 6397 13669 6382 10350 6383 10798 15880 11135 6414 9639 15881 6371 301 6415 6412 6930 3044 5772 15882 6394 10263 6639 15883 6388 3079 15884 15885 6592 6403 6393 6391 15886 2071 10304 15887 2254 10261 15888 4582 329 15374 2485 15889 6704 2160 5397 6786 6398 14331 8579 6573 6392 400 1594 1430 5008 2305 557 6411 1476 5405 2061 6586 9618 1437 15890 5393 15891 10367 1436 3737 15892 6400 11704 15893 3076 15894 6624 14217 10340 2130 4627 15895 6396 1706 4628 15896 1421 15897 293 15898 1445 2136 194 176 4622 7362 15899 15900 805 15901 15902 14235 325 11336 8597 5424 2566 438 3133 372 1832 529 8023 6379 6389 15903 15904 6417 15905 15906 15907 801 6620 3056 203 2510 2292 12129 14299 12544 8728 9830
501 13206 2367 3858 15908 3396 1865 15909 15910 15911 13411 15912 5113 3328 15913 3896 15733 12123 4785 4819 4738 3607 6776 4726 4820 4727 15641 6520 3883 6846 1755 991 2282 917 13423 12443 3132 1079 15271 15914 12984 4541
502 3078 1609 15225 15600 718 15595 15594 14728 15439 7339 7919 15915 13928 6816 3305 6962 15916 15917 8578 15918 5767 2361 6980 8776 4629 1613 14521 4519 450 8894 8695 8639 13911 453 6624 15919 13789 8579 15920 1619 15921 13825 13823 13889 8611 5400 13909 8699 13798 15922 15923 2263 15924 15925 6799 3304 6801 6800 6798 6149 540 6814 801 15926 559 456 6360 15927 541 15928 15929 4895 15930 15931 4891 4894 15932 3192 7928 1236 9177 160
503 6899 15933 6889 1703 5629 10752 15934 10683 2225 1670 7094 15935 1639 2448 1224 5290 5296 5294 15936 1123 4546 15937 15938 15939 4477 1364 1365 1369 1366 1371 1373 1368 1370 1372 1381 1378 1380 1367 4393 1382 1375 1418 1377 1390 1389 1388 1386 1384 1385 1383 15940 1647 1701 6888 15941 15942 15943 15944 2193 6155 2175 2194 2195 4385 1679 15945 12097 15946 9237 2237 1114 4535 6116 6919 6112 2163 6366 7657 7684 7686 2592 9044 7688 9045 7689 9043 1674 1698 15947 1699 9050 6288 15948 4552 15949 6915 6901 15950 12424 12599 8244 6153 6911 6913 1666 11242 1450 5313 15951 1186 5353 1705 6097 15952 15953 15954 15955 15956 1361 15957 1663 1154 15958 15959 3487 10753 15960 15961 5826 15962 15963 5827 5825 2595 15964 11323 1152 2574 1251 15965 6918 6908 15966 15967 10696 6297 6898 15968 6912 15969 15970 15971 6359 6360 15972 15927 456 6088 2634 2450 15973 11185 15974 15975 15976 5596 15977 4381 15978 11183 9544 11182 11186 4849 4848 15979 6714 15980 6105 15981 1691 6906 5156 5155 5677 15982 15983 6902 1307 7681 7743 15984 15985 15986 15987
504 2248 6577 299 3021 408 2511 8290 1572 7363 621 194 2344 3031 374 770 2267 12126 1319 810 1563 1795 1582 15988 1831 306 323 6616 195 2362 806 15989 192 6589 783 3052 12539 15990 2318 15422 331 300 558 13898 4522 396 765 2323 2322 13312 2253 15991 302 15992 15993 4632 13801 9293 2077 546 9819 15994 1594 9376 3794 479 13139 397 3135 5006 1430 2247 1437 620 2136 15995 553 208 305 6701 3059 310 12133 307 3420 4628 5407 3422 559 2153 6825 2117 9528 11164 774
505 3820 1500 1493 1492 1314 1277 1502 1508 1503 1504 8433 4994 1546 15996 13466 3549 11042 15997 15998 4981 6121 4946 5079 3548 5030 7611 15999 5452 5246 13300 16000 3547
506 16001 3280 16002 16003 15669 3288 16004 15406 14759 14662 16005 455 2971 6992 16006 16007 16008
507 7929 3991 1079 1169 283 1004 16009 16010 16011 14847 14040 16012 16013 15651 16014 16015 4112 4776 4780 594 3884 12534 714 991 15246 16016 16017 10454 1003 155 16018 5172 16019 14312 13839 2525 2493 16020 16021 15479 9925 613 7467
508 751 750 16022 1842 2944 12987 1948 13163 6855 11472 12992 3555 593 592 1824 624 4067 594 16023 14466 16024 1735 16025 2958 8127 13379 4109 696 1714 1923 844 6838 3983 2019 2936 13202 16026 4749 7872 4059 469 2273 585 1060 16027 3557 16028 16029 9873 16030 16031 6524 14761 582 12682 11483 2491 4124 2952 9336 872 1965 3902 632 15740 2937 7492 15030 1742 11551 15654 605 3559 14467 3892 10419 3907 16032 7489 3885 3838 991 16033 15075 4051 2282 2396 11475 1752 11467 5137 2390 580 869 7262 1745 670 879 13955 744 12213 11917 16034 1816 7944 1933 9332 4010 4177 16035 4161 11531 14733 894 3132 2409 11515 8308 1077 2926 651 16036 15217 12591 868 15311 4186 2713 16037 16038 16039 16040 642 1538 16041 6991 718 2525 16042 16043 3594 16044 4096 571 2406 13208 2408 9441 877 2382 3866
509 1017 11719 1023 14417 1537 254 643 3568 12998
510 15147 2650 2651 1015 11720 2654 11721 16045 2655 16046 2652 2653 10002 10001 15169 11611 16047 16048 16049 16050 16051 16052 13294 15144 16053 11612 16054 5288 16055 16056 8169 279 16057 10322 16058 16059 15168 16060 16061 16062 16063 16064 8264 13299 13274 12495 3563 13273 16065 14422 14413 16066 16067 16068 16069 3564 3566 3565 3567 1023 12519 12472 5278 16070
511 7706 9813 16071 12092 12229 16072 9755 1963 15045 7720 3155 16073 559 194 9401 176 4522 6650 1831 5994 16074 2097 553 1209 3463 1792 195 5646 206 1788 10267 293 551 779 187 1478 203 1446 3471 16075
512 7706 15045 9755 7709 7708 9773 16076 160 16073 559 194 9401 176 545 5646 1831 5994 2098 16074 2097 1426 8759 5648 4523 2087 293 3472 551 777 779 776 778 187 1478 1445 1447 1446 4461 369 16075 1209 792 192
513 11475 4082 5059 870 13378 2398 3984 6846 4016 4013 1977 10045 12587 8126 15070 15240 1948 16077 2273 11772 4075 591 3890 15221 15644 11762 594 1849 3928 2638 589 969
514 2747 2746 2693 7614 2694 3248 16078 12732 16079 2699 2733 2780 2016 2015
515 10919 10941 10920 2203 1811 5447 10926 10548 10122 11300 10783 10224 10549 2517 10918 10163 10162
516 16080 12032 12916 16081 16082 16083 16084 16085 16086 4734 3192 16087 16088 16089 16090 16091 16092 16093 16094 16095 16096 3089 16097 16098 2067 3070 546 1428 4598 7417 16099 13888 8573 8802 6624 6625 2263 8728 8654 8611 16100 283 623 12308 2319 4843 3048 620 1795 3021 805 324 478 2315 3109 12325 1430 529 16101 13306 16102 12150 4570
517 2903 9266 176 8593 199 2123 189 775 1552 4648 2473 202 2319 206 2084 2465 2085 2075 187 792 3792 2360 814 4649 4650 8897 3024 3092 1593 7364 3421 3052 2362 1437 3739 1620 5413 5000 5400 15994
518 585 559 15489 14466 848 4135 744 2396 2964 3981 11108 674 970 16103 2667 12332 1959 3313 893 12583 16104 13484 1739 3316 15537
519 692 16105 16106 2025 5593 2533 2011 8967 2525 16107 2492 3204 543 2662 16108 16109 16110 16111
520 861 16112 10027 3385 10592 9328 10018 9731 1061 11533 858 10026 4347 16113 16114 16115 16116 16117 2790 853 15346 16118
521 16119 16120 16121 16122 16123 16124 16125 16126 16127 16128 16129 16130 16131 16132 16133 16134 16135 16136 16137 16138 16139 16140 16141 16142 16143
522 16144 16145 16137 16146 16147 16148 16149 16150 16151 16152 16153 16154 16155 16156 16157 16158
523 16159 5655 16160 977 2446 16161 14655 16162 4289 13806 16163 3596 896 13808 16164 1257 16165 6351 2628 6352 1229 3678 16166 16167 16094 16168 16169 16170 9506 8977 5112 4430 3191 16171 9531
524 16144 16019 16141 16172 16173 16174 16147 16157
525 2337 7649 7650 16175 16176 15600 654 1954 470 714 16177 1076 3382 693 7617 9288 7618 3919 969 2397 1000 6659
526 7782 9791 3147 15045 16178 10468 7652 9773 15048 7711 16179 6738 11479 15115 11106 3945 554 566 7679 7680 16180 7767 12247 16181 9756 12089 12092 3146 7712 9748 7129 16182 16183 14381 5120 2818 2776 2729 12083 7286 16184 642 9797 16185 10467 3175 16186 7789 3156 9786 3200 6520 1764 3533 4090 14456 7939 1027 16187 3323 7617 820 8200 7575 16188 9504 718 9503 7781 12231 7728 16189 7700 9753 7920 7670 15047 7708 7673 13354 16190 8266 9795 7733 16191 2957 15220 10611 1870 2954 12582 618 12236 12229 16192 12230 10463 3159 9799 16193 9772 7709 16194 16195 3120 3322 1032 12696 16196 2382 16197 12251 7791 7704 12560 2969 4079 8268 13181 11775 577 12683 2380 9794 9749 7725 9754 7706 9755 722 16198 978 5466 16072 11477 1755 16199 3292 16200 3143 3419 13869 16201 16202 15755 16203 16204 13867 10603 3425 10460 16205 12226 292 208 545
527 7596 13718 16206 7588 13711 16207 10969 10981 16208 6008 5964 16209 7540 10990 10988 16210 16211 10989 11345 81 2 1 1216 11081 1214 7 103 65 86 88 97 11017 7501 8196 16212 6013 121 10956
528 16213 10492 1314 16214 16215 16216 16217 16218 5856 9418 545 553 778 189 197 369
529 7650 2337 1023 16219 739 2525 16220 16221 1811 1538 3584 3585 1537 7896 14528 14547 15395 1169 16222 10524 16223 15281 16224 559
530 1169 5596 3012 16225 16226 1811 16227 12237 16228 16229 16230
531 13398 571 1718 992 16022 2954 1816 953 2405 8315 2929 6664 1960 6524 2380 3954 2680 747 2282 1933
532 3842 3976 629 5318 1730 3396 1865 2966 16231 4103 1762 844 2278
533 2679 4037 10047 16232 11601 5732 1650 2681 16233 16234 5047 4818 5017 8418 3617 3618 16235 5056 12105 4827 16236 12108 4820 6774 4722 4824 4723 6773 16237 12682 8250 11554 16238 2400 12854 16239 16240 3986 16241 16242 990 12587 1976 16243 16244 14005
534 12611 15478 16245 14851 16246 14373 7136 2828 16247 16248 5747 7290 14364 2840 2734 16249 5104 2811 16250 15386 16251 2728 2695 2839 2714 2735 2801 16252 15477 9925 16253 15246 2838 2841 2845 14375 16254 5100 16255 3615 642 16256 2873
535 16257 16258 16259 16260 16261 16262 11808 16263 16264 13184 16265 5107 16266 16267 16268 5336 7628 5335 16269 5334 5329 5325 16270 5333 144 16271 16272 16273 7465 16274 9666 16275 7041 7042 16276 6533 6534 16277 16278 7012 16279 16280 15486 16281 16282 16283 16284 16285 16286 6538 9284 16287 16288 7021 7020 16289 16290 16291 7023 16292 16293 16294 16295 4430 16296 5327 16297 16298 16299 16300 11931 16301 9778 16302 12008 5248 16303 15263 12013 16304 4946 12399 13066 4978 4987 4982 3549 11047 16305 16306 16307 12569 16308 16309 16310 16311 16312 16313 16314 16315 16316 16317 16318 16319 16320 16321 16322 16323 16324 7669 16325 16326 1811 6038 5328 16327 16328 16329 7631 16330 16331 12073 16332 16333 16334
536 16335 14037 11846 16336 5604 13970 16337 12595
537 2794 2795 608 5057 880 704 1960 1961 11657 12583 3964 13171 592 4350 4784 3976 867 4061 582 2958 4083 3830 10420 4008 10419 3908 4069 15221 1069 15070 468 3349 465 1936 593 4084 16338 1815 854 1855 1854 1850 1853 7261 15642 11918 10047 3907 12210 879 607 15095 16339 6845 4175 4176 16042 6846 16028 581 2273 7966 9447 605 16340 16341 16342 1816 16343 866 3985 16344 4078 15643 12903 870 4160 746 469 602 474 16345 10049 3973 5059 3892 754 8314 16346 10611 16347 16348 1756 11760 16349 12877 4031 12875 8137 16350 16351 16352 4119 4351 1938 1717 6520 16353 4158 16354 917 1959 15489 2979 12080 713 12582 6507 9296 12214 16355 16077 8251 744 1930 1741 1933 4067 3918 16356 7948 572 12573 16357 691 16358 1852 4053 4052 1909 16359 12989 604 16191 16360 16361 1912 16362 10035 10612 12006 3970 11772 16363 4103 9445 16364 15220 573 3837 16365 1859 1772 669 13955 16366 15275 9474 4026 591 571 10448 1948 10609 6869 4060 1881 647 695 8152 1910 4058 2525 3940 618 3975
538 16367 13092 16368 16369 16370 16371 7867 16372 16373 16374 7800 16375 7989 6779 16376 16377 16378 6783 14015 16379 16380 7456 12960 7886 12416 4910 16381 16382 4908 16383 7643 7642 7649 1800 2334 7814 16384 16385 16386 14529 4888 16387 2337 16388
539 296 3098 3767 14138 8597 292 16389 132 16390 8896 3076 16391 805 2116 2117 3078 5615 13827 2902 807 2270 12173 16392 6142 4843 11113 9822 3077 4841 9852 16393 3784 14226 3133 3038 15923 1422 14128 11713 15522
540 1729 6738 3875 596 10923 16394 10905 16395 11257 16396 10832 10735 2272 16397 16398 15344 16399 16400 12801 15336 10717 10897 5484 16401 13942 10843 3746 10124 10165 10219 16402 16403 9680 13778 16404 16405 13414 7054 14646 16406 3403 16407 4430 160 3323 2525
541 13843 3918 674 10412 992 4168 16408 16409 15210 16410 2912 12889 12779 2635 141 16411 829 2018 827 2014 7209 16412 822 2533 14762 878 16413 14701 16414 16415 14768 1075 10012 16416 16417 16418
542 16419 16420 14810 16421 16422 16423 16424 16425 16426 16427 16428 16429 16430 16431 16432 14812 16433 16434 16435 16436 16437 16438 16439 16440 2212 16441 16442 11899
543 16443 6941 16444 16445 5666 7764 12395 7769 15914 12978 15686 16446 16447 12264 2413 1735 14473 14471 2929 2966 14469 998 999 9303 1000 2525 1004 16448 16449 16450 2432 16451 16452 16453 10525 10478 10504 10482
544 1294 5829 16454 10682 6904 2592 1674 1639 367 9072 10536 16455 11802 5474 5475 11199 10710 11252 11200 11246 11244 11201 11202 11203 11409 11204 10546 9240 10714 10925 2201 10910 2202 11205 11279 10527 10838 11260 11390 2180 16456 9693 6289 4592 16457 6894 9175 4589 16458 16459 14266 6288 9050 9051 9700 9048 9047 16460 5683 3541 2522 1120 3433 16461 3453 9704 1644 6301 16462 2224 3728 10715 13765 12452 5485 10090 16463 5458 15367 340 9076 213 365 1404 482 5840 5841 5845 1399 384 9080 4499 16464 10691 386 425 333 347 9077 326 426 418 414 9151 16465 6872 9135 6871 6334 2228 14820 7445 8948 6891 10735 10836 10535 10906 181 7682 5830 16466 237 1238 2183 385 7554 1625 7657 7687 7684 7686 7690 6366 7689 327 16467 16468 178 1246 8259 3796 2517 2516 2515 6528 342 6305 341 9079 339 2260 6306 388 389 3701 7086 1288 8161 8177 7091 3702 7085 8162 16469 1190 9134 231 16470 16471 9160 10671 16472 16473 16474 16475 16476 2624 3740 1261 8182 8226 15442 1289 16477 2423 8874 1233 6223 1702 1632 6222 1260 1211 1199 7123 1134 5706 5661 3643 4551 6339 11156 16478 16479 16480 16481 8652 16482 12266 14283 16483 16484 13819 16485 15232 5639 2551 13818 8581 4647 16486 16487 16488 16489 13312 16490 15923 13793 16491 16492 16493 16494 16495 16496 14245 9930 5300 7364 3098 3787 13832 16497 16498 16499 6375 16500 8583 16501 16502 13790 16503 16504 319 16505 1579 8292 8294 8288 13161 16506 810 4835 16507 8291 10337 756 16508 5703 757 15896 1789 12515 2890 8742 5645 1423 16509 16510 800 6828 796 1790 4521 2097 7517 13947 4457 10243 8186 16511 4456 10241 4523 2358 10242 16512 1788 16513 290 1209 3474 793 9383 16514 13211 4522 6832 4656 2484 294 16515 11367 205 3770 16516 373 6443 4458 6824 12170 8740 7383 5619 5887 396 3106 16517 8879 2117 13212 3300 7396 2076 2143 187 2148 10407 2158 14201 10406 7393 2154 188 2140 2142 2147 2145 8747 4657 2156 3522 16518 311 16519 6571 10232 3097 2465 2319 2247 1571 16520 292 296 553 208 1792 195 1424 2898 1434 1433 16521 6829 761 302 2482 8185 3464 196 1831 1795 529 299 371 298 314 315 317 318 316 301 369 306 324 805 334 478 16522 6590 548 6650 5883 1426 1787 5646 5648 16523 5647 1425 16524 1779 9740 411 204 557 2472 176 406 372 15230 9823 9357 16525 202 10796 798 6628 16526 6811 1442 621 16527 16528 9784 1785 2144 2146 802 5415 2149 5638 13160 2155 2151 2150 12941 15994 1591 2674 7347 7194 1783 198 186 6594 10353 16529 6599 6579 11691 5418 6589 620 277 2159 374 4525 16530 6826 2309 16531 2160 2359 1320 5379 6558 6825 6580 549 11136 12317 201 194 1582 13146 12126 397 293 552 4628 16532 15904 10357 5881 9780 8736 2152 16533 6576 5882 199 538 5016 6595 3096 3024 4649 10344 5386 15372 16534 7371 16535 1435 192 6446 6821 6831 8754 6822 5301 5890 5302 6448 16536 16537 619 5144 812 8757 2078 2096 8189 4648 1794 16538
545 16539 7311 4273 16540 16541 12932 16542 5438
546 3073 1478 5423 2097 2484 1574 290 1210 1433 9449 204 2362 7388 4463 3266 1793 13682 187 369 192 8764 2895 16543 3070 3071 774 2343 310 2360 553 13755 623 2465 3069 2291 1562 16544 3012 403 410 1029 699 15021 3915 1843 1938 8337 8252 8332 15512 4646 3105 10801 1589 4623 16545 1430 621 311 2474 3092 8621 15022 1593 440 10372 1612 1594 10347 15023 1552 3794 529 3072 2317 2295 10254 3059 5421 7394 16546 1617 2242 2266 3763 2525 3971 7458 609 3250 16547 4702 16548 3192 4841 4657 205 5377 876
547 691 1067 14724 3901 2963 4178 5221 2968 1941 3936 14603 1898 4067 1825 16549 14698 14697 6477 12209 16550 625 3842 3975 3976 2658 16551 686 1844 4038 16552 15293 16553 609 15086 3938 3826 655 12560 153 16554 16555 11554 595 3918 1758 15096 8333 16556 1843 10417 687 10418 688 2664 745 1741 744 1070 1836 11870 6740 16557 16558 754 12210 15643 1956 1930 16559 469 16560 3328 465 463 468 4782 1910 693 1925 1762 14719 11104 142 473 475 733 2639 1938 713 1730 627 3917 591 881 2524 4117 3899 16348 11480 13195 15236 1918 16561 16562 16360 13182 16563 967 6738 11792 16564 16565 10457 12919 16566 14993 3154 4915 6457 6481 7859 12028 13557 7848 16567 14995 6923 12103 12022 16568 16569 13243 16570 6752 16347 16571 3935 16572 16573 4784 594 2981 1742 15247 3839 1077 1906 1076 12711 13444 13501 8336 579 11796 150 148 151 3827 16574 16575 1850 1851 3129 4050 4049 1853 4052 1852 1848 1847 1846 1845 1857 3928 1849 1855 2638 1870 1708 1768 3898 16346 2415 1824 8315 2407 3194 14717 14720 11525 474 12936 4037 14005 2042 4139 862 841 1881 1731 16576 15070 16351 7111 11505 681 680 16577 1087 1816 3372 11776 16578 16579 16580 2922 10436 3933 16581 7955 12989 16582 3848 16583 8262 10434 14709 2283 4410 11536 12691 917 11106 6042 16584 2396 16585 11695 6505 866 2681 16586 11843 16587 2740 2773 16588 2750 2847 2659 2692 2691 2690 5747 16589 2814 2825 13951 9987 16590 16591 2718 2713 2742 16592 16593 16594 16595 7158 2817 14377 14381 16596 16597 12894 12613 14885 6858 821 2405 10446 10439 16598 16599 11500 16600 16601 16602 8313 4783 1042 934 6687 3264 4111 16603 14635 867 2667 4214 714 461 3199 1937 11537 6750 5135 8251 16604 16605 4085 4086 3981 15346 15312 1871 1883 9434 2038 2034 2039 2029 8325 16606 4137 2954 3297 1829 11918 16607 16608 11542 16609 472 1929 14725 16610 16611 631 15292 14512 16612 3923 3925 16613 3924 3363 3927 11919 16614 3922 16615 4045 4044 16616 14799 674 10413 10412 16617 3926 15867 11752 4046 6516 15510 12990 6517 15869 4047 2948 13586 3929 3203 3200 16344 3263 5127 661 16618 16619 16620 16238 8314 12784 12889 4119 993 16621 746 748 16622 1030 992 657
548 16623 8418 6756 4830 4827 3609 16624 3616 16408 16625 16626 16627 16628 16629 9312 16630 12594 16631 16632 16633 16634 16635 6050 15110 10857 16636 5048 5050 5047 6774 5045 4736 4720 4871 3611 16637 4724 4821 16638 4725 16639 16640 4721 4828 16641 4768 4826 6762 15331 16642 4787 4790 4789 15333 15330 15332 6763 15329 16643 12123 12124 4803 4786 16236 12106 8417 12105 6777 4785 16644 686 16645 16646 14597 685 11480 5126 16647 16648 16649 16650 16651 4825 4800 16652 4726 5049 5042 6773 4872 4737 16653 5043 5044 4824 16654 4722 16655 4770 16656 9966 4822 16657 16658 6761 12110 9964 12872 8318 923 16659 16660 1910 4186 10414 4037 1843 3196 16661 12735 16662 16663 7635 16664 16235 16665 16666 16667 5039 16668 3617 4730 12121 16669 6776 16035 6492 16670 11439 16671 1855 16672 16673 1076 16674 16551 8330 16675 12771 16676 3195 2369 4030 16677 3142 7649 3607 5038 12109
549 16678 16679 16680 8938 16681 8907 16682 8456 16683 16684 48 40 39 16685 21 11 8939 3591 15770 18 12 16686 16687 16688 9 16689 16690 16691 15451 13741 15820 16692 15447 8947 8913 10621 32 45 16693 8903 16694 16695 8937 13031 16696 8901 16697 16698 16699 16700 15863 12338 8928 16701 8902 16 3601 8900 16702 16703 13002 8945 4695 4693 4694 4692 4699 16704 4698 4686 4697 15802 15835 16705 8921 16706 13 4687 11672 8923 4696 16707 15857 8013 13004 16708 16709 10648 16710
550 10650 8936 10649 48 10651 8912 18 9920 16711 16712 16713 16714 16715 16716 16717 16718 16719 16720 16721 16722 16723 16724 9916 16725 16726 16727 16728 16729 16730 16731 16732 16733 16734 16735 16736 6983 16737 16738 16739 16740 16741 16742
551 10255 7417 14686 623 16743 13908 12310 5771 16744 3732 2257 3089 16745 6375 2250 12311 6973 12320 2343 2315 2259 12324 16746 768 3050 8785 8674 437 7398 16747 13876 16748 16749 11689 2246 12287 1555 2263 16750 6022 8879 10236 4570 12554
552 16751 13688 13687 10824 13699 16752 15206 13696 11903 14412 11876 11877 13692 13709 13698 13693 13708
553 2699 2689 2863 2686 16753 5104 2740 2739 2696 16754 16755 2701 2728 2735 2713 16596 2751 2844 2747 2744 2808 2857 2775 16756 2736 2722 2711 6837 16757 2729 2856 2828 16758 2727 2721 2724 2723 2843 2719 16759 2810 2803 14381 2851 16760 7141 14844 15477 15478 3613 7748 15651 16761 6836 4557 2800 7916 14349 16762 9163 718 16763 7168 16764 2854 2840 2846 14856 16765 14849 7750 14851 14855 15480 7473 16246 16017 7137 16766 5744 5081 2807 2659 16248 12611 2759 1811 575 16767 8104 2820 2818 7142 7183 7303 14347 13757 14361 14373 15386 7283 16768 16769 5100 16770 16771 16772 2734 16773 16256 12290 2773 2694 13761 14375 2849 16774 16775 16776 16777
554 16778 14612 14326 3409 16779 8474 8472 8473 16780 1283 6081 8460 15161 9466 5177 12517 253 12500 2971 6848 6508 16781 16782 2664 2943 11473 13180 2525 1893 2976 1609 7644 2337 937 11108 1751 2956 9434 15005 3297 629 732 848 2964
555 2573 16783 15941 14951 2430 8813 8814 7688 15955 5357 1674 11784 8573 8574 5567 13547 7416 5564 4598 5565 8575 5568 5569 16784 8577 6709 8576 6652 16785 16786 6710 15222 4599 7981 7983 9869 9868 16787 6708 16788 7844 14934 16789 2596 16790 16791 12424 1244 2556 16792 2588 16793 16794 16795 2193 16796 6914 375 16797 9252 1307 5347 1663 1669 1189 1676 2469 9045 1156 8161 16798 16799 16800 16801 16802 2592 1233 1646 16803 2599 1248 16804 2480 9256 16805 3712 16806 2421 9258 16807 3519 3487 2500 16808 2462 14835 9253 6360 16809
556 16810 16811 11074 3191 1169 16812 7468 3192 16813 1609 16814 16815 15328
557 10694 10991 10985 8078 3219 10986 13712 16816 7526 6019 16206 7931 7777 13376 10971 8080 11944 5550 11058 5965 8377 7539 10960 10987 8380 563 16817 16818 6000 8351 118 11023 7504 120 8197 16819 16820 16821 11074 5999 8092 7508 16822 6442 2622 2430 10335 1352 2222 10957 11937 7602 3730 8362 8107 8373 7532 8357 11019 15288 10802 8095 10821 3012 16823 9750 1546 16824 16825 12622 5131
558 104 108 8349 1004 16826 283 16827 14744 6007 84 94 5 16828 8079 7586 16206 6019 16829 16830 107 68 7538 85 8197 14423 9998 16831 16832 289 7537 15714 1213 1 8085 8084 5976 5973 10973 2 16833 563 7513 1215 8377 1264 16061 15156 16064 16062 16834 9470 3572 3581 14827 16835 1025 1265 16836 16837 10957 1010 1023 13275 1609 13784 9751 10330 7608 7531 16821 11055 16838 16839 911 16840 140 16841 16842 16843 16844 16845 16846 2333 16847 2334 3607 3617 16848 16657 16849 3611 4872 5047 5053 16850 16851 5048 6773 4732 5041 5042 15334 16852 4871 6760 6775 16853 4720 4820 4730 12120 16668 16667 4800 6776 16854 16855 16652 4738 16856 16857 4830 16858 4819 4736 16859 5049 6777 16860 16861 4788 4787 4728 4829 12122 16862 16863 15333 4769 6762 6763 16642 15330 15331 16641 15329 4790 15332 4789 4768 4799 16864 16865 4827 12111 16866 4767 12112 16867 16868 16869 4826 16870 16871 6785 5043 16872 5051 5044 5045 4737 16873 16653 4726 6761 4798 16874 16875 4721 4828 16876 4729 4818 16877 16878 4825 8418 8415 8416 16879 12106 15303 4812 16880 16881 15035 16882 3990 2394 4778 4777 2413 1735 4776 580 3907 3854 4784 1070 754 2525 838 3121 16883 821 16884 4189 16885 2493 16886 155 14715 7746 14927 16887 9303
559 5189 5214 16888 5212 1806 9980 10897 9240
560 4375 2261 4368 4383 11829 14491 4635 9141 5699 5799 5070
561 6472 4226 1962 13302 3003 4545 10607 2337
562 6409 5408 6631 2472 7392 16889 15022 3108 16890 3076 1438 8896 3055 3787 3050 1604 3093 405 16891 4841 3794 1553 16493 529 532 16892 1437 2467
563 1679 1307 15957 1632 16893 8876 2564 6185
564 1538 978 455 240 16894 7775 5340 7313 13043 15208 16895 16896 7334 16897 16898 7924 16899 7923 7312 7989 16884 16900 3121 16901
565 9215 2533 1628 8968 9220 13236 16106 835 1354 828 2014 2016 827 825 829 2005 13076 822 1627 833 1356 7340 15536 15534 2011 824 1353 1996 16902 3222 837 2006 5508 15134 16903 6057 13301 16904 16905 16906 16907 8367 16908 16909 16910 7103 7988 12176 16911 2015 16912 16913 16914 15343 1357 16915 2021 12808 12802 12813 9305 12798 12821 12799 12796 12800 12801 7908 12815 12795 12810 12814 12797 2001 16916 1626 16917 12807 12824 12822 5507 16918 4434 16919 16920 9214 2010 8967 8966 8969 16921 5517 16922 5518 16923 5519 16924 16925 16926 16927 9216 9206 1999 1629 2007 832 16928 16929 2027 9205 2000 2004 2009
566 2908 14742 2337 5173 722 16930 16931 3606
567 4015 1709 580 7461 16932 16933 3192 838 7492 4138 654 3941 16934 3120 3352 16935 8305 16936 9163 1811 2525 16937 1988 1963 6869 1764 3252 1933 647 12200 16938 16939 3404 5117 16940 16941 16111 16110 604 3366 8320
568 16942 12101 16943 15337 835 1355 832 2023 15338 2024 1996 837 12463 7473 16944 6921 12104 12047 16945 14741 12043 16946 16947 13559 13554 16948 7855 7850 7856 15457 16949 7852 12069 16950 16951 16952 16953 7461 14468 6037 7786 2212 2214 13590 9811 15209 11454 15568 15571 15573 2220 718 16954 722 13504 1511 16955 1546 16956 11861 16957 16958 16959 16960 16961 14998 16962 11860 16963 16964 7469 16965 14997 16966 16967 16968 16969 16970 16971 16972 7848 12038 12103 16973 16974 16975 16976 4890 12595 12960 4905
569 5225 16977 12399 4946 9778 8345 5226 16978
570 1563 1551 2933 8899 3105 1562 3097 16979 16980 4492 5423 1581 2308 2361 397 6928 5393 1586 2324 16981 2067 2934 12696 3386 3199 3134 550 3051 369 192 1320 619 14270 12180 3771 3091 4575 1582 277 203 194 405 16982 3106 7367 16527 197 6081 14612 3409 16983 12501 293 2493 15734 461 991 571 8274 3080 16498 4841 2117 3736 2483 16984 8685 4519 16985 14590 5948 3089 8783 8295 6931 1428 1567 3034 3039 3088 2299 1795 761 4633 6558 6933 3019 6575 797 3087 6625 478 1790 4215 2258 206 16986 7364 4874 16987 10856 11794 3192 16988 557 2270 1317 16989 283 1004 309 1552 2903 2077 3101 15474 4643 4850 1023 16990 16991
571 12159 1707 12280 3092 2190 13303 405 8678 16992 12672 3792 12160 12554 525 8599 16993 546 3070 8806 352 357 356 16994 8676 16995 9363 16996 5423 12155 8605 8776 13338 10280 1594 5015 2323 8619 194 3731 16997 13142 8064 8728 8618 13307 6928 13157 12321 16998 412 5644 7390 8897 8772 8784 12180 13137 3303 6625 2251 6385 13889 8894 6933 3737 3059 3105 176 16750 16999 12265 12157 8771 8774 13314 17000 6978 1466 1469 6609 2071 3077 13324 17001 13828 4575 9895 2067 2319 1831 11334 2081 4457 796 293 760 11136 297 1792 195 1784 5995 545 1779 2097 3474 206 9448 189 1583 1591 6593 2465 4498 2473 13949 6131 1439 5887 202 1442 2362 9450 207 4656 209 2484 17002 3471 196 3266 208 187 792 3097 192 1780 8763 2906 369 3475 2078 1789 761 307 8767 3096 17003 8778 12308 309 6936 13326 8770 17004 6581 6582 4610 3019 12136 13793 12179 1613 481 2467 1468 17005 17006 1571 13322 10236 359 6384 12150 17007 17008 7367 13135 17009 14776 9396 3098 3784 13902 403 621 8625 2461 5398 5377 13907 2525 838 3323 6520 596 714 14731 3200 8252 1730 1821 2396 17010 6204 17011 17012 763 11698 8700 17013 17014 328 13915 5682 2189 8828 4573 11168 17015 300 8580 3035 3095 9822 17016 2466 1421 13153 1430 17017 529 13334 4629 17018 5425
572 14533 14562 17019 14573 15400 17020 14565 14568 14534 14567 17021 14528 17022 14561 15395 4220
573 165 484 521 487 522 488 904 903 490 167 491 902 10512 17023 905 906 907 168 17024 909 17025 4922 4924 17026 17027 17028 17029 11831 11746 17030 9778 4984 5226 4946 16304 17031 5452 17032 17033 17034 17035 5341 5440 5344 12445 16000 3549 13928 17036 11749 6862 6660 6659 2432 1996 826 17037 822 835 17038 17039 5508 17040 17041 832 1627 9306 15338 2007 837 7471 838 631 12583 6042 6043 917 1933 1930 4049 1857 2638 1849 3928 1855 673 5125 969 11440 675 3594 10414 4185 17042 7897 6687 674 15509 13918 821 2337 13808 2974 17043 17044 17045 4336 4245 4250 7305 5439 17046 7420 247 246 266
574 8677 8688 1467 6449 16496 6029 13915 3044 8054 17047 3732 8578 17048 6184 1321 6946 12320 8774 1538 718 8619 5398 4579 15923 2096 5422 6375 2510 5589 5587 7846 3045 3039 3090 17049 17050 13798 17051 9353 17052 17053 17054 4571 10801 17055 17056 1594 9851 4519 3764 2323 372 13142 4569 17057 4621 3070 12177 14686 13822 17058 4648 9294 2568 8894 7357 5423 2525 283 10250 17059 6102 17060 17061 17062 17063 13139 13905 3736 15918 17064
575 13672 17065 17066 553 809 2123 810 8022 8019 17067
576 10694 2203 2201 10710 5536 10108 10147 10931 978 13279 13291 12528 2220 8170 16061 17068 17069 17070 17071 1021 17072 9871 775 4215 192 1572 208 814 369 4463
577 17073 5175 17074 17075 8488 4996 17076 4327 1502 1496 17077 1503 3413 3803 1277 17078 17079 5174 5139 17080 17081 17082 12648 3586 3801 17083 14831 256 5182 10953 17084 8831 17085 17086 17087 1527 17088 1528 17089 17090 17091 257 1526 17092 13509 2647 13493 17093 17094 14612 17095 17096 17097 17098 1314 4995 17099 15752 5129 3817 5200 251 17100 17101 1687 1680 17102 11629 14345 17103 17104 17105 17106 8561 17107 17108 17109 13511 14330 1683 6081 17110 17111 17112 17113 17114 13475 17115 17116 17117 17118 17119 17120 14439 17121 17122 17123 12488 17124 13936 17125 8515 15629 8455 13505 1508 17126 17127 17128 1549 16955 17129 5374 17130 17131 17132 2933 12626 1268 17133 3409 8830 17134 17135 1169 17136 17137 16544 1537 17138 13047 1284 1684 17139 13050 8516 17140 17141 15531 17142 17143 17144 12621 6079 17145 17146 17147 5371 14805 17148 1509 1512 17149 14804 17150 8498 17151 250 17152 8501 1492 17153 1463 17154 1493 258 1490 3809 8471 8469 17155 17156 14911 17157 17158 17159 8452 14321 14329 17160 12627 17161 8393 17162
578 1214 1213 6007 7904 17163 2337 17164 17165 86 66 100 88 55 56 87 57 54 63 1215 84 1 9410 8362 6019 3277 96 110 11019 7508 12569 10966 563 17166 4910 7457 7989 17167 8537 17168 2373 17169 3220 11015 5979 11054 10956 4 52 69 64 8360 8074 7499 17170 8107 10979 5992 11076 17171 1683 17172 8460 6081 12508 8388 17173 1504 5432 17174 5175 3800 8549 8553 16983 15731 1277 17175 1279 1282 8554 1537 6010 7538 4673 17176 13713 5984 81 1130 3664 1127 3665 17177 17178 2514 2591 2603 6257 8093 6001 6011 15714 17179 11724 17180 17181 11999 7408 283 17182 17183 17184 8380 1457 6013 9146 6715 6725 1128 3648 3663 17185 1129 3711 7417 17186 13887 6711 17187 17188 15882 6395 11707 6810 189 3134 17189 309 17190 310
579 16301 4962 15997 4967 17191 5079 9778 17192 17034 4946 10082 5237 5076 4964 4950 17193 4953 5234 10072 4948
580 16045 2654 5288 1015 11720 2655 16046 16068 17194 9437 6984 3012 1010 6985 1016 14428 15145 11721 17195 11618 14423 2971 829 11615 17196 17197 17198 12476 17199 17077 17079 16069 14828 17200 17201 17202 17203 10953 256 257 1526 13512 17204 17205 17206 8031 17207 17108 17078 17208 17209 3583 4996 17210 1022 15159 17211 1017 17212 14824 13296 1014 5430 1503 12498 1502 1500 4994 8388 17213 1277 12483 1492 3410 15630 1504 1463 17214 1509 17215 13277 12623 12329 17216 17144 17217 15059 8571 1508 17128 1513 14321 17218 1683 17219 17097 12637 1314 13491 17220 17221 17222 17223 12622 12655 17224 14329 5685
581 17225 2800 17226 4855 17227 3154 141 17228 17229 17230 6533 1023
582 17231 17232 17233 17234 13768 17235 17236 2175 9703 17237
583 1938 3887 751 4126 2398 1757 15261 13202 11546 1708 1717 991
584 17238 17239 17240 5955 2442 17241 5908 13095 978 6452 11872 17242 17243 17244 13649 17245
585 11461 559 192 5619 194 305 762 2080 814
586 17246 17247 17248 4659 17249 11158 17250 9406 9404 1169 9523 6696 17251 718 4670 9409 4658 9403 4665 17252 17253 9555 17254
587 17255 9403 17250 9406 17256 11727 9409 17246 4658
588 4226 5585 17257 12415 17258 13994 7872 5604 17259 13428 17260 4749 3616 4792 4820 17261 8413 17262 17263 17264 4545 17265 4748 2372 17266 17267 17268 4595
589 5386 1554 1555 1556 17269 1476 2249 4843 4844 2270 2238 3048 4609 1474 11116 1421 17270 2239 1553 1475 1477 203 5771 17271 17272 3024 399 9364 397 396 10338 8584 8290 1576 3134 10235 1569 8291 8288 621 16520 553 323 4993 3472 8157 8156 528 4992 2461 304 370 6202 6125 3420 8597 8207 6126 325 805 324 296 292 369 290 208 277 303 307 291 321 2136 2123 556 2139 810 319 4526 9781 1706 13160 1581 2484 6576 5881 3765 7393 6593 197 368 412 204 407 2483 6590 411 6572 2324 547 409 6579 537 1795 3052 549 2317 10341 410 529 4498 408 1430 311 3097 5008 5379 802 9355 4522 809 2894 2096 6127 791 2137 9962 2895 3136 1582 2247 1584 12133 1583 2092 305 622 1578 7349 778 1589 1552 2903 10390 3791 5387 2070 3794 17273 4361 3411 1490 1491 3809 17274 14612 17275 14326 17276 12501 4225 1283 8456 6083 8472 17277 3409 8477 5686 16779 8469 16780 1498 12476 17278 2669 8440 12484 17279 12482 17280 12478 5368 12481 12474 15014 17281 3812 8393 8395 1496 17282 12504 253 12517 8387 13491 9465 5435 6079 5946 8401 254 12646 5173 8402 8507 1518 1516 17283 1515 1517 12617 8835 17284 8425 8447 15731 1495 13050 6084 17285 8428 8411 17286 13871 1315 17287 17203 13481 17160 8396 8443 1499 8441 1497 5373 5372 3800 17288 17289 16682 13119 17159 14552 17290 14587 14558 14581 5172 3820 17291 12647 15013 17292 8564 5188 12491 12487 12488 1525 12489 12486 1522 1523 1520 8464 17113 12639 17293 5370 13362 17294 5204 12475 12499 13690 5208 17295 12397 11837 14831 17296 5182 1512 12620 8392 17297 1683 979 3211 4288 17077 12626 8495 17298 14329 6077 12500 17299 8451 17300 9421 12729 5130 8979 15060 17301 14913 1529 10953 17302 17108 17107 17078 17303 17099 11085 17104 2646 17304 17305 17306 17307 17308 17309 8391 17122 17310 17311 9668 17312 16285 16276 3404 14663 17313 9462 14654 6539 17314 3405 7024 9274 17315 17316 14644 9956 5115 14348 9673 13772 9660 9280 17317 7029 7030 7031 9665 9955 7015 17318 17319 17320 15486 17321 3399 3401 17322 17323 7046 7054 7033 13770 5116 7026 17324 6537 9658 11978 725 8543 8545 724 723 1551 17325 11089 1463 5376 14911 8498 2649 8499 17144 17326 17327 4221 7777 17328 1539 17329 17330 17331 1538 1165 17332 2974 17333 15589 17334 718 17335 17135 17336 9464 17337 17338 17339 5132 17340 17341 2931 16956 8547 4997 12634 8491 12473 17217 17342 17343 17344 17345 17346 13386 5198 3811 3326 17347 14322 14829 17348 17349 5690 8403 8506 8404 17350 17351 5375 13505 17352 3803 14590 17353 13497 17354 1483 6734 5131 17355 17356 14833 1311 17357 17222 17358 15059 17359 1274 2668 5141 14805 5371 8439 17360 1268 3416 15291 12195 1313 17361 8567 15063 8566 8565 6737 16825 17362 17363 17364 17365 17366 17367 5138 8446 17368 17369 17370 17371 17372 8505 8515 5687 12196 17373 17150 8026 17374 17375 8429 8452 17376 17377 5129 17378 8468 8470 17379 8475 17380 14342 14388 8444 1488 17381 8558 17382 13489 17383 13502 17141 3584 17384 17385 8442 12480 8836 8389 17386 17387 17388 8388 12479 17081 17389 17390 2648 17391 12631 12630 12637 17392 17393 1236 6360 192 8751 1591 315 317
590 5604 4242 17394 4880 17395 4764 6775 4736 12120 4820 4798 6773 16655 4792 8418 17396 17397 17398 12467 2373 17399 17400 17401 17402
591 16141 16145 17403 17404 17405 17406 16148 16146
592 4469 17407 9238 10955 7821 13222 17408 8527
593 10549 129 10808 17409 5214 10547 1806 5212 13610 15548 17410 13945 10895 10706 1807 5553 10551 10209 17411 17412 17413 10146 10145 1333 13078 5462 13607 10755 5536 10787 11250 17414
594 7750 15651 7470 10423 15481 10424 10456 16944 17415 17416 15649 14860 8142 8141 14854 14853 17417 14859 14856 10451
595 701 17418 17419 17420 9714 12780 971 14451 17421 17422 953 10032 17423 17424 6471 3121 17425 6459 12743 15693 9739 17426 1031 821 17427
596 17428 8029 17429 7423 251 1958 17430 17431 17432 1504 14345 5373 17377 17093 17074 17107 17433 8515 17434 5168 8405 17435 3819 9793 13482 10694 13363 15757 9165 9166 17436 5129 1537 718
597 3116 16630 16413 997 953 2635 3860 17437 9736
598 7173 17438 17439 17440 7148 17441 17442 17443 17444 17445 17446 2693 17447 17448 16763 13757 16754 2700 17449 17450 2686 2740 2697 2337 14362 17451 17452 2767 7145 15872 7126 17453
599 17454 17455 17456 3273 17457 17458 15668 17459 15670 17460 17461 15671 15669 14756 11851 14750 17462 17463 17464 17465 17466 14747 3275 17467 17468 17469 17470 14752 14751 14753 17471 3290 3289 3282 17472 14746 14760 17473 17474 17475 17476
600 692 628 16648 6478 2936 12863 17477 924 6495 17478 837 666 991 17479
601 15400 14528 1165 17480 14554 17481 17482 17483 3407 7034 3402 7027 3405 3404 14678 9679 5111 9459 3399 8191 5116 16407 7053 4430 3419 15281 5172 17484 17485 16220 1023 17486
602 718 2525 4082 14780 991 7944 2365 642 16291 17487 6520 7989 15325
603 7781 9795 17488 4162 1538 12756 4229 12792 9800 7659 559 192 13947 1427 775 12146 2097 11343 447 189 2301 307 17489 17490 9787 17491 17492 15726 14659 2635 17493 3175 17494 10467 17495 17496 17497 17498 9914 12246 9802 9801 7758 2396 1822 1821 611 2525 7706 12089 3181 4984 12445 13300 6121 17499 718 7733 16186 7782 7708 12194 17500 17501 16199 9753 14529 17502 1023 12519 17503 9761 3183 17504
604 14399 11566 17505 17506 13697 13925 3012 1537 12491 257 2647 14831 1513 13924 11456 14504 17507 13696 14409 14411 13940 11458 11888 11905 14401 11460 11570 13937 11459 17508 11887 11868 17509 13931 9901 9900 17510 17511 9899 17512
605 11476 8153 707 3914 12517 3955 3849 1730 1712 991 6868 740 1726 2961 876 17513 15026 1599 780 369 13321 203 176 189 1574 2484 1553 290 192 778 5886 1209 3267 2108 1421 4215 1589 200 2101 557 4610 559 2363 10330 1060 1935 6520 2283 650 2962 1076 17514 10899 10096 17515 10719 2203 3846 3199 6476 1986 2944 3915 1843 7745 8332 12901 4079 1723 11502 894
606 3607 4828 4818 4787 6848 11091 3363 673 17266 7951 17516 2533 9222 16647 17517 17518 714 9328 5056 7870 7872 17519 13675 775 1785 208 373 799 564 17520 17521 3355 17522 5587
607 543 17523 1049 673 10029 17524 1086 1057 1967 1992
608 14937 14936 15942 6899 1638 2193 14950 5355 8163
609 16406 10011 10008 1057 1038 913 1082 958 6685 2635 6539 9284 6529 13775 9679 7055 9659 9663 9664 9950 13412 5112 13773 17525 17526 17527 9669 9459 9463 5111 9660 16285 14661 5114 16284 3402 7046 17528 17316 9956 14348 5115 9274 17315 7019 3401 3407 3404 3405 7024 3399 9279 9106 1305 1297 6093 9110 8970 15315 2364 11078 5467 7484 6039 15034 17529 16073 5490 17530 17531 11493 4419 17532 17533 5465 16194 5466 17534 1811 7010 11985 7001 4430 9276 17535 17536 17537 17319 17320 17538 7015 17539 14669 7052 15911 7041 17540 15718 6537 7022 16290 16287 16289 7020 13777 14371 17541 4437 4440 8192 17542 4438 17543 17544 17545 14656 7035 14695 17546 5116 13770 7033 7054 7027 17321 17318 9960 7032 17547 7053 9953 17548
610 10533 9982 10586 10716 10837 10536 11424 17549 17550 5532 10215 10725 10833 10544 10197 17551 11235 10788 17552 17553 15194 11311 9977 10836 15192 10548 10291 9984 10543 17554 10901 17555 17556 10907 10908 10546 17557 10549 11198 11397 10910 10935 17558 10934 11252 11199 11205 11200 10710 11244 11201 10925 17559 10839 2202 11409 11204 10779 10932 11196 10780 11203 9240 11240 11416 11202 5560 5470 10745 10744 10747 10111 10748 10743 10741 5469 10746 17560 11270 10529 10530 10223 9975 10782 10093 16402 10212 10210 10209 9980 10922 17561 10211 10587 11435 11428 11220 10750 10581 10727 10777 10834 9985 10778 10554 10555 10726 10911 10584 11279 9986 10528 10527 17562 10526 10545 10577 10576 10538 10532 10201 10531 10718 10771 10773 11219 11210 11450 10764 10769 10774 10767 10776 10775 10772 10768 6753 10559 10565 10558 10791 5525 5526 10787 10540 10575
611 10569 10137 5456 17551 10534 10786 17563 10536 11235 10586 10139 10140 10135 11397 11198 11244 10710 11200 17558 11246 10925 11252 11201 10902 10199 10748 10743 10744 10746 10832 10839 10173 10848 11424 11806 9982 10198 10291 10735 10542 10837 10577 9979 10197 10196 17553 11280 17564 11822 17550 10936 10545 9977 9980 10789 10942 10835 10211 10212 10210 10209 10115 17562 10533 11238 10843 10791 10570 5525 5527 10568 5526 10787 10575 10540 10572 10719 10751 11263 10578 9984 5558 11395 17565 11230 10904 11394 10732 11270 9975 17560 16402 5524 10091 10736 10194 10737 10741 10745 10747 10092 10740 10218 17566 11197 9976 10293 10543 10544 11255 11407 17554 10757 17567 10539 10724 10535 10527 10526 11427 5470
612 15045 51 12092 3295 718 559 192 545 17568 1831 370 369 814 775 306 805 189 529 408
613 17569 17570 4195 17571 17572 17573 17574 17575 17498 17576 17577 17578 17579 17580 8863 8862 17581
614 17582 12620 980 12616 17220 2648 6521 10694 2054 17293 12639 13362 4960 12400 2971 1286 11838 5864 978 1537 5202 8484 17583 17151 8393 6079 17148 12480 5174 3800 8551 17584 17585 13599 11085 17081 12634 4329 1487
615 17586 3152 15324 11975 11970 2662 7404 12414
616 5085 2702 642 2851 16760 2848 17587 7141 7192 11843 17588 2883 12894 6836 12613 17589 2784 17590 3610 17591 17592 16109 17593 17594 17595 2703 17596 5091 5095 17597 5741 17598 5739 5109 5080 13542 2704 2357 17599 12695 2372 2365 9178 17600 5106 9180 17601 5096
617 1468 8610 3070 229 3701 17602 17603 11373 13915 8605 9822 3109 6947 329 5617 3096 458 1706 2123 3047 14130 9938 6372 7200 529 12556 13795
618 17604 17605 14689 17606 9399 17607 11652 14684 14693 17608 12131 17609
619 2927 692 667 1028 3117 988 17610 3376 2048 959 8275 3140 3116 15072 1072 4044
620 17611 17612 17613 17614 8136 17615 10660 38 37 8943 13734 17616 17617 15768 15769 11 17618 4687 17619 40 41 36 35 21 13733 11669 17620 17621 17622 17623 17624 17625 16690 17626 17627 16695 8942 18 8003 8002 17 15774 4689 15792 3604 17628 15818 15 14 10662 17629 17630 15820 17631 13002 50 15823 7998 17632 17633 49 15786 8902 17634 15836 17635 31 8118 8119 17636 17637 17638 17639 17640 17641 7999 17642 17643 10657 13748 8922 3600 8906 17644 8939 17645 8938 8910 11671 17646 4695 15816 15702 16706 4680
621 13217 6492 3854 3972 3246 148 150 151 1849 3928 1855 1845 1846 3927 1850 1852 1848 1847 675 17647 4057 11468 11479 15007 4098 12987 4132 11544 17648 595 6693 1889 4046 917 469 4129 1714 14600 3968 571 1067 6851 3910 3909 2406 13379 670 12990 3122 17649 12212 1853 2491 2046 592 6684 2036 8236 7262 9432 14799 1959 1851 3982 691 11509 3925 1857 593 583 17650 712 711 7745 15471 3594 8242 12713 1798 9443 16242 874 4344 6503
622 13109 2337 7831 718 3546 3545 12020 3544 3548 17651 8304 13092 970 674 16648 17652 10414 4186 17653 10416 10415 3829 4185 4184 675 11786 8129 2667 1878 1938 991 3945 3206 1713 15637 4157 4160 733 15272 471 473 472 476 714 4085 17654 5588 17655 12910 17656 4757 12907 14020 7861 12927 13987 15111 17657 17401 17658 7986 7865 7647 7642 17659 17660 7873 7649 7645 17661 17662 17663 7641 7823 17664 17665 14016 16382 13227 7646 7648 17666 17667 13111 17668 12919 13842 15299 7676 17669 14015 7806 13242 17670 17671 13238 17396 17672 2336 17673 14017 17674 13243 4876 17675 4745 2332 17676 17677 13237 17678 2330 17679 16636 4885 12909 5137 17680 600 1045 3314 4106 3298 4348 1758 11106 14726 593 1933 917 13234 17681 15095 17479 3918 17682 17683 1042 2277 8324 4101 17684 13220 17685 16815 17686 7875 17687 4910 15124
623 17688 17689 12458 6455 4192 51 13349 17690 11650 16448 15673 9908 1005 1006 3271 1004 1007 283 16826 1008 1543 7605 15181 17691 17692 15176 17693 17694 9758 9757 978 17695 17696 17697 13369 15189
624 6477 2525 17698 13223 13109 17699 14795 4240 17700 17701 7649 16384 17702 13220 8522 17703 17704 17705
625 17706 7407 7404 2662 2247 9364 1476 2136 810 1421 7766 17707 17708 2436 17709 559 141 15322 17586 12409 17710 17711 15324 5422 1428 2887 3420 9492 2895 8769 440 6825 3472 2116 1552
626 4787 16624 17712 17713 17714 15298 5604 7797 17264 17715 17716 4802 4785 17717 14028 14010 17718 15295 4240 13978 14021 17262 13842 5494 17719 17720 4736 4826 16865 4827 15329 16656 4726 4800 5053 17721 14638 12102 7612 17722 14389 17723 15002 14735 4888 17724 17725 5589 5590 17726 13999 7649 17727 17728 17729
627 3951 1958 2979 945 937 1965 1863 11757 3935 11476 467 6664 817 11750 998 1577 208 17730 2038 4137 7935 13193 4161 17610 4107 6694 12575 10050 12586 2410 2280 4044 10597 12902 15243 2281 8445 8514 1685 16983 2933 1266 17731 3915 9273 14596 13406 3365 3824 3131 1959 14603 9330 11529 3955 1855 609 10434 10049 1843 11766 17732 3376 17733 3121 17734 17735 4128 712 4089 1755 3311 3901 12584 3849 13469 7489 13935 978 141 17736 2276 2408 10045 8126 17737 14444 12212 1320 545 6130 1433 201 775 805 2113 369 619 187 784 4656 6821 3266 792 559 1811 3533 4011 460 10044 9264 159 8322 17738 17739 2375 2396 3404 3407 5112 8128 875 4103 9458 681 11768 6520 1896 8332 15130 3323 8141 12564 155 17740 722 16670 15081 14788 3594 677 6690 12696 571 2922 2041 11761 1993 16552 11108
628 10536 10735 17741 9840 14687 17742 17743 17744 9842 17745 17746 17747 17748 17749 17750 2363 17014 17234 17751 17752 17753 17754 17755 5714 3746 3745
629 2706 12249 17756 619 1473 1207 559 17757 455 456 12087 17758 5099 17759 13539 17760 17761 17762 14374 17763 2775 7129 2809 17764 17765 2748 2840 17766 17767 17768 17769 7152 643 2662 8200 141 2713 7277 17770 17771 17772 10326 2673 12612 14375 7037 5114 17773 7187 5118 16256 14379 2692 3126 16183 17774 5110 17775 2777 2828 13757 17776 14380 17777 17778 17779 17780 17781 17782 17783 14381 9788 3183 6904 160 3248 17784 5120 2710 3176 17785 3178 6038 17786 17787 17788 17789 16769 16766 2868 2773 2750 17790 16251 2740 5123 17791 5104 5101 17446 9185 9186 17792 12733 2880 2737 642 7768 13358 17793 14523 9747 5242 17794 3545 17795 7571
630 11598 11577 17796 642 12613 17797 12340 7760 11869 4118 12676 17798 17799 17800 17801 17802 12563 12696 1729 16939 4410 4111 17803 17804 17805 17806 4202 17807 1538 3211 13098 2200 2202 2203 6423 16083 17808 17809 17810 2219 2214 7786 2220 16095 16096 17811 9771 9753 17812 7576 7667 6038
631 170 484 901 1169 10508 10488 10485 500 10525 10511 514 495 13960 17813 17814 17815 17816 513 161
632 3884 11484 15113 888 2387 11478 1933 7490 14706 594 4079 6520 3996 1820
633 6836 12613 10694 6521 17817 17818 2773 2742 2814 17819 16755 16940 17820 2880 7145 10085 15872 7288 2877 17821 12733 17440 17822 17823 17824 12201 4557 17825 17826 17827 7148 17828 17829 17830 7186 17831 7140 2851 2807 2821 2768 17832 14033 12115 2809 7193 17833 7225 17587 17375 17834 5172 13839 17835 17836 13255 17837 17838 7144 7179 14358 2784 2357 14503 2963 2396 4344 2365 17839 17840 14012 2832 17841 17842 17843 1996 17844 9235 2813 17845 17846 17847 2699 17848 7167 17849 4910 2330 9189 822 12810 2001 5508 2008 17850 9455 17851 16103 1962 13516 1712 1939 11473 461 3199 15270 4160 4214 3950 13981 2737 17852 2850 17853 7457 17854 9793 4679 17855 2533 17856 17857 8968 837 2830 17858 17859 7133 17860 15876 7155 17861 7271 17862 16381 5603 7132 7299 17589 3830 17863 4026 17864 17865 15742 2525 13967 14797 17866 7267 7277 2800 16847 3607 17867 5495 7256 17868 640 14353 17759 2884 2883 17685 7643 15124 17869 17870
634 1668 6889 4598 8573 6888 4635 16795 1292 1638 1665 10753 8994 11029 17871 160 6906 1679 15942 17872 1693 17873 15946 17874
635 154 692 1060 3875 945 3951 666 877 997 832
636 8861 17875 17876 16720 17877 9916 9918 16724
637 3875 992 4229 6459 744 13443 17878 11471 466 6664 8269 11463 1962 17879 16634 16613 689 4053 15868 11106 3923 3363 17880 4244 4319 6959 17881 4283 5340 4151 3361 14708 5318 2665 3314 3316 1958 13405 17882 17883 17884 7427 17328 3129 1076 675 12853 9721 1761 4046 602 12597 13375 11556 9471 3017 2796 14927 11588 17885 13836 17886 17887 17888 2341 9342 11796 704 15511 14599 934 2635
638 997 3317 3968 2963 4014 601 620 619 192 2460 202 369 3266 205 2674 792 7393 12049 17889 17890
639 8682 1467 17012 6389 10345 17891 4569 7350 17892 718 8792 17893 8070 15555 8071 6700 17048 6559 6560 17064 12132 8783 4570 8618 8057 5775 10333 12273 16998 6942 17894 17895 12553 3732 10227 4584 8890 1775 2011 2025 1627 1998 9206 1999 2021 17896 8779 12157 13137 5709 13914 2301 5382 5000 12144 767 768 6927 17897 12275 3795 17898 17899 15429 17900 8667 17901 17902 13834 12279 9394 8060 1594 14686 13874 5012 3059 203 17903 17904 17905 445 13319 2461 4624 1421 16535 196 303 16532 810 1787 1789 1424 10403 813 10237 2104 2100 545 11344 8589 3522 16518 3788 10306 531 15411 11353 190 2263 8634 17906 17907 15427 17908 11374 8635 9922 17909 17910 17911 17912 4610 10363 8616 8793 8672 6412 8806 6929 559 7831 17913 674 13585 7897 4185 17914
640 7713 17915 7697 10460 9755 17916 16199 9774 9753 12253 17917 7720 9801 12228 7790 16186 10463 17918 7725 17919
641 1910 12969 13381 17920 3196 10608 3961 4030 15664 935 4135 5057 12977 13434 15459 917 10442 15739 17921 17922 1099 564 7947 1096 9924 2398 1959 2282 13435 14780 2406 17923 3559 3313 586 15054 617 3120 9927 7948 4003 3131 16571 3307 15006 17924 17925 1868 585 840 13432 6525 1867 1770 2412 15665 4115 12868 15640 17926 17927 13952 15268 3933 593 2403 4344 4133 696 11547 893 591 2393 845 4071 16602 12711 17928 703 873 991 7758 1755 8307 13393 11526 17929 6866 13183 4541 17930 3857 11092 14696 17931 13421 4775 3863 15641 17932 2028 1076 12980 17933 3841 1875 4125 13450
642 14745 16596 6835 17934 17817 17935 17777 7237
643 17936 17937 9802 4782 1878 2365 17500 12194 7706 17938 16199 9801 7736 12082 2729 7287 16184 12083 1538 7421 244 1939 4056 8515 17939 9814 17940 9794 7728 9730 8275 14453 642 7614 4213 2525 6037 17941 51 11078 7711 6190 17942 2807
644 3317 3397 1709 17943 2283 369 619 779 202 792
645 4955 9777 10078 17944 17459 2437 17945 13863 7770 484 17707
646 14997 15457 17946 17947 12070 11861 17948 17949 7849 17950 17951 17952 13251 17953 7853 17954 7625 13554 17955 14995 17956 12040 17957 17958 7797 182 7820 7799 17959 7858 16943 7469 16974 16930 16964 12024 13248 11840 17960 17961 17962 16332 16945 16973 17963 3121 838 1069 3854 3907 4054 4048 3924 4046 10414 934 1855 1853 1851 1850 1852 1846 1845 1857 1847 1848 1849 691 469 474 13551 12103 17964 7854 7852 17965 7715 7714 3147 16324 7670 17966 17501 3144 7653 9810 7663 9787 17967 9789 17968 17969 7667 3164 3155 7672 7576 17970 3162 7592 7664 7572 17917 7654 3148 7729 3163 17971 7659 5466 5465 12046 7620 7851 12035 17972 17973 12033 13559 17974 11860 16959 17975 16932 17976 17977 16970 17978 6923 12074 17979 17980 12069 17981 17982 12036 17983 6922 17984 17985 17986 15455 16547 16948 13553 17987 12077 14468 155 11549 11552 17923 696 4133 9431 617 629 3961 17988 4043 10416 15254 17989 17990 17991 17992 13570 10415 4184 17993 11102 7966 1985 9434 7941 7951 4004 17994 3876 1906 1076 8308 3966 17995 17996 15080 11107 11097 15132 675 676 677 678 679 4480 8151 680 4037 17997 681 682 683 684 14597 685 686 16645 1843 687 688 17998 17999 3355 3372 3868 1899 624 870 1870 1910 1042 18000 3927 2948 1767 1067 12691 12710 1962 11751 1941 714 468 463 11124 11125 4782 18001 3246 18002 18003 673 18004 969 18005 970 674 4186 17652 2665 4185 3592 18006 3594 18007 8122 17653 935 6667 12902 8236 18008 18009 18010 12586 18011 18012 3593 18013 18014 672 2947 14709 571 10966 16321 18015 141 12049 16951 12029 13552 18016 18017 16957 16949 16958 18018 7461 18019 4151 972 1995 821 4152 2055 18020 17328 4991 15747 13703 4310 18021 18022 271 267 4262 274 18023 4210 18024 4302 7324 14306 10793 4244 18025 18026 18027 12942 18028 13879 247 18029 11636 243 3064 5438 7427 266 263 265 4268 18030 18031 18032 269 1538 18033 7925 18034 18035 9287 1023 12519 16883 4189 16961 16809 7855 7850 14998 18036 18037 18038 18039 18040 12048 15456 7622 15458 18041 13247 14742
647 1034 18042 637 18043 13282 18044 5129 3585 1492 17289 1493 722 4042 9731 476 14614 921 1925 3946 697 9720 2529 2927 692 3017 18045 718 2965 1039 3014 10694 6521 3008 12340 13034 3121 959 16618 14409 3012 2525 1105 13275 2971 729 3140 3116 2528 3317 3533 4230 3117 2987 9729 2797 18046 12342 18047 18048 1072
648 1072 692 18049 3116 12835 1102 2524 17890 12831 861 2965 12903 15758 7485 11477 9213 18050 17427 3611 5510 7209 16915 12755 10012 18051 15213 18052
649 18053 18054 10665 18055 16683 16678 8939 18056 13856 13860 13858 18057
650 5237 4959 4952 4955 4964 4961 4962 4938 4936 4965 11990 5338 4933 5252 4935 4960 4949 4944 4942 4941 4946 12399 4945 4947 4937 4958 5235 4966 13257 4967 17191 18058 18059 17651 18060 5065 18061 4956 12019 13300 16977 4934 5258 5257 5260 5264 5262 5259 14729 18062 5249 13068 18063 18064 4957 18065 18066 4953 12018 18067 18068 18069 4954 18070 11995 18071 18072 6362 18073 18074 11988 18075 18076 18077 18078 18079 9778 18080 18081 18082 4940 18083 18084 5255 18085 18086 18087 18088 18089 18090 4963 4939 18091 18092 18093 18094 18095 18096 18097 4973 15591 18098 18099 12446 18100 8347 18101 18102 10074 4984 18103 17499 4983 11989 18104 5265 18105 18106 8346 718 17333 3011 4557 642 7226 9187 7252 18107 5747 18108 16248 18109 18110 18111 18112 18113 9183 18114 2805 2876 16588 16255 18115 2745 2748
651 13687 11569 11888 1165 10821 10824 18116 13578 18117 17511 722 15729 18118 4995 1500 17393
652 3806 3221 18119 18120 18121 18122 18123 18124 575 18125 18126 15614 248 18127 3572 18128 15144 18129 1017 18130 12525 18131 12524
653 9541 9542 18132 4289 18133 1551 8412 8544 722 3006 18134 18135 17080 18136 18137 18138 18139 18140 15616 15617
654 4329 1500 17280 8443 18141 643 18142 3807 718 4957
655 331 14125 14140 14286 14127 6411 18143 12322 6592 6591 18144 6601 18145 2474 3767
656 2329 18146 4040 4479 1755 8252 3292 3261 2525 6664 3206 2492 11124 18147 15739 733 5075 4959 4947 3549 718 3291
657 1244 2512 5789 6291 1340 419 18148 415 5313 6319 6315 5322 326 18149 13530 18150 5314 5824 333 342 340 3501 1204 3442 18151 6716 9017 9016 3437 1307 9052 390 18152 4383 388 3447 5576 18153 5800 3636 14480 5785 4363 18154 5321 5306 8881 13533 5805 18155 6528 2470 1288 1262 5838 14500 6566 545 195 2891 8743 1428 12315 18156 1429 801 3105 277 205 1431 18157 292 1434 1433 1437 1791 550 2894 4651 16513 8761 5144 176 1780 1439 6131 553 369 2093 1445 1447 782 208 2362 2111 5389 1448 9373 3266 6948 7519 765 3047 187 792 767 1427 1435 16535 18158 8763 192 297 6821 3475 6446 9783 9608 18159 316 6621 10369 1558 10371 18160 2896 18161 6806 10275 6805 1606 18162 4646 9292 11126 14147 18163 1832 14146 18164 1321 6546 9128 3510 379 394 378 337 5779 3494 8045 5791 391 346 7557 1221 183 9073 213 1455 6550 2172 336 3489 9098 5067 435 5848 1690 14484 5806 18165 1632 2623 11732 2463 1112 5627 1541 1695 6098 18166 6431 129 6263 363 3493 6334 3439 1406 5794 4477 3112 9152 9482 5787 16454 18167 6544 18168 6324 4483 3515 214 18169 3435 3526 2421 9148 1392 14267 3448 9143 1362 1454 3521 18170 6302 6264
658 1831 1795 3739 2464 3303 458 9359 8610 7762 6029 8773 13303 8779 4576 8595 559 1352 18171 7407 17706 837 18172 11726 16886 838 594 917 2282 11124 596 991 14731 3206 1933 15109 6085 472 1822 1938 2286 1821 714 3946 674 18173 673 5125 969 18174 10414 4186 675 11789 4185 3594 1930 3948 3323 155 2525 972 141 18175 18176 7605 18177 18178 8095
659 18058 3552 11048 18179 18180 14400 11564 14403 13688 14406 11458 14408 9901 18181
660 18182 723 18183 18184 14391 15466 18185 5604 18186 18187
661 1128 2208 6183 2594 1323 6196 11157 184 2486 14821 2595 2545 1186 1231 1141 3716 6199 3641 18188 3642 1120 2429 1182 18189 18190 1673 18191 2608 1307 9244 18192 1135 3631 2620 3621 3619 3620 1396 4550 2180 3542 3688 1263 7443 18193 2553
662 1455 4592 6883 18194 9087 18195 5313 18196 9484 6431 18197 3437 18198 5789
663 18199 17465 18200 18201 17473 16003 17459 18202
664 5083 18203 4558 7252 3191 2220 15566 5120 5084 6477 14763 2739 14315 12144 553 8906 10620 18204 7237 16611
665 13038 48 13744 18205 13020 15836 15798 9422 8133 8931 15856 4692 13746 13745 17616 11671 8941 15837 18206 3591 15851
666 5172 1684 15629 1685 5138 12197 14318 18207 17130 18208 13050 18209
667 10724 10727 10901 10725 5558 10721 5448 5505 10559 10536 11244 10167 10839 2201 2203 10837 10546 10941 11268 10215 10547 10756 10535 10143 10584 5560 17551 10554 11250 10728 10583
668 18210 8458 12396 18211 18212 18213 12616 3817
669 3913 9431 1772 476 15742 7490 10040 1861 654 1085 1538 821 2961 3915 18214 6478 3955 17994 7936 2924 697 1798 12583 15865 11470 11462 9262 3849 15218 10597 991 2404 13193 12209 1896 12564 2963 18215 18216 18217 2944 3875
670 16791 17873 18218 6901 18219 18220 1307 12422 18221 1638 2198 6888 18222 6908 15934 14481 6433 6906 129 18223 9256 128 9253 3191 2673 1352 1154 1996 18224 5518 18225 13531 18226 160 11880 1236 6338
671 7881 4813 4890 4733 4886 14984 10860 7643 4803 6775 18227 3618 17679 14983 4868
672 10091 10711 13766 11449 5478 13053 10536 10549 18228 13646 10150 11802 10568 10571 10575 10162 10742 10532 18229 5561 11241 5527 10291 18230 10096 10782 18231 18232 5502 11314 11313 5474 11320 18233 10551 11823 5472 10209 18234 10724 10123 5531 5505 17562 10940 5532 18235 10221 18236 10848 10850 5560 11321 11253 11265 13941 10765 13765 5485 10580 5483 11255 5526 5525 10941 10569 11245 10716 10756 11806 10547 18237 10174 11287 5557 11812 11293 10838 10128 18238 10719 10945 5458 10586 11425 10736 11431 11226 16395 11238 10108 18239 11317 10584 10583
673 6083 2921 13386 18240 8392 8388 17358 9998 3801 18241
674 10732 5560 5450 5528 18242 10536 18243 1263 18188 11151 4587 9050 2180 6302 18244 9682 6112 1244 6334 17004 8693 9850 5158 11228 9047 11388 5536 1224 6301 9134 1625 6720 6257 16462 2224 5324 3728 5485 10090 9986 6891 13523 425 9686 14492 10836 10216 5470 1405 5830 2642 6164 3774 1362 2604 5527 11227 7446 5847 16467 3452 378 7085 1288 3638 1632
675 1032 6520 2365 642 2800 18245 2773 14368 18246 12733 2880 7145 2877 7288 15872 18247 18248 7281 18249 4341 2766 2864 18250 2525 18251 18252 17846 18253 18254 3126 16771 2707 2765 14380 18255 12291 7297 7143 18256 2699 7125 17438 18257 18258 14472 838 6664 708 1897 12898 192 4461 8884 9356 805 205 3471
676 3116 1042 2929 5104 14883 642 2525 1842 1824 692 641 14382 4340 1504 1500 9924 7171 18259 17822 12733 5084 2773 838 997 4061 1818 7131 7256
677 1644 1352 2434 2435 2432 18260 7086 216 18261 8258 1235 2535 391 1238 18262 1302 5701 18263 3693 8877 228 3777 5657 8162 8177 1125 1174 2463 18264 3740 9565 9561 8178 11387 2537 4547 1191 12673 3539 1689 1188 1395 11121 2610 1148 2449 2420 2180 3642 1256 1133 5679 6198 2456 18265 1449 1225 8172 6098 2181 6889 180 2584 15971 622 194 208 192 6131 15228 547 410 6610 305 1433 13947 556 619 550 369 779 1439 5299 2091 2058 1442 1786 2093 292 782 1421 3471 3266 18266 10366 529 2484 12379 1791 8763 18267 812 3475 9783 187 8767 307 203 7083 5692 18268 2501 16469 4511 184 2488 2589 18269 5800 223 2505 1407 1322 210 6436 221 229 2541 8215 1195 3695 7375 7073 18270 2607 6212 1632 5673 2515 238 6094 18271 2509 18272 2575 9132 3441 1236 18273 18274 18275 18276 978 160 5628 237 3538 1229 3668 15203 6442 2183 1695 4497 2418 16167 2601 8287 8163 4537 1262 1122 8176 8283 1300 11137 2554 6345 2478 212 3720 6169 18277 1237 4536 15379 1167 1179 1182 18278 3634 18279 1193 1233 219 1194 4596 5695
678 11767 2525 4226 2959 4099 10040 3829 998 12947 4812 11480 12564 2337 2954 2415 682
679 6509 3854 1928 7490 2041 893 2354 1741 2396 18280
680 722 3154 12787 12788 12345 12828 9223 18281 2019 18282 18283 822 1628 16399 2011 12823 18284 12883 1662 18285 18286 1660 4813 3121 18287 4890 18288 18289 18290 12810 18291 18292 18293 16437 7407 7405 17169 4776 12735 18294 9316 9317 18295 12850 18296 13723 18297 18298 5735 3345 18299 11584 18300 18301 18302 16408 18303 18304 13202 751 6487 12825 160 18305 18306 18307 18308 173
681 2337 7910 10955 18309 18310 5595 15109 3323 18311 18312 5604 7799
682 9684 18313 18314 2520 9887 18315 1290 14956 2549 2486 18316 18317 1231 1212 18318 3701 237 5296 1242 3705 51 718 1244 1302 1182 15944 6916 1252 6252 210 1186 2488 2597 16160 1206 1109 1636 2624 4432 2234 1292 6165 18319 8876 18320 226 1228 2448 18321 1194 978 977 2606 18322 15951 18323 11607 5439 8986 18324 12961 6834 266 247 269 267 15488 4321 5340 3062 18325 1538 643 8977 18326 6100 12661 1690 1142 8960 18327 5347 211 6111 483 9843 1625 2562 14946 9118 9496 2599 5654 18328 2502 2554 2505 2191 1325 7479 9108 1134 5628 1810 1224 1169 18329 160 18330 1623 18331 5515 18332 827 18333 9223 5593 18334 16921 14050 18335 4542 14016 1596 1195 2621 6233 9709 2418 9681 3735 3697
683 9338 18336 9472 958 8142 11869 4185 1956 4188 668 2923 2993 18287 14701 14443 14635 3352 3239 1925 940 12856 3386 2788 12841
684 10045 1961 3961 3359 2410 2277 4101 1884 2490 3139 1759 1813 14596 1861 566 3377 18337 15461 2365 1875 7759 3154 4805 18338 602 15074 15496 15494 2935 17680 3977 6665 616 1798 2240 632 1087 3831 17830 2694 7233 2740 2751 7290 641 2773 7145 2880 12733 2877 18339 7276 7288 15872 2659 2753 2700 2742 18340 18256 4553 17449 18341 17588 642 18342 18343 11555 11554 4097 8308 1906 1077 18344 1918 1741 3971 5221 4103 18345 1909 10044 12969 7941 6677 18012 18346 3316 841 870 18347 11099 1060 16027 18348 8126 15495 1029 11771 4049 18349 2924 3825 18350 871 18351 7967 18352 11765 2033 18353 18354 14004 18355 4037 680 681 682 679 677 678 11098
685 2928 3394 12998 754 2048 18356 1069 594 591 4776 1735 4784 2525
686 18357 18358 18359 5876 18360 18361 18362 6453 5855 5933 18363 14899 5850 17242 18364 5133 5142 1544 5172 14655 18365 18366 5896 4288 2974 5860 5937 18367 2337 4732 4407 7465 17245 5926 5908 5932 18368 5939 11755 1165 14924 18369 5921 14115 5870 4529 14458 15115 3950 744 18370 13375 974 980 14055 18371 5875 14088 18372 14081 18373 3211 545 369 785 778 2078 529 546 18374 782 5408 6831 4461 2896 805 192 11949 5879 5938 18375 18376 18377 14080 4207 18378 4561 2692 2691 18245 17831 4479 4128 677 15765 5859 18379 11884 18380 14918 18381 9416 5923 18382 5874 14062 18383 18384 5925 2305 9380 14882 18385 18386
687 9850 1594 10280 3033 2265 529 5145 11164 2315 2259 4623 5618 4620 12159 2343 3731 8611 4609 6607 13822 3092 1586 5399 801 18387 203 13832 408 3304 12257 13253 15308 2099 194 1320 804 1788 5619 791 305 4516 297 290 2073 199 14235 1210 200 13213 8187 8189 369 10273 6833 18388 4463 198 205 552 189 18389 192 18158 8763 8765 8327 195 18390 1792 3464 788 5379 410 16749 18391 18392 12551 14288 2189 18393 13823 3078 3044 13225 11845 18394 18395 18396 14789 14796 18397 2337 12308 18398 18399 2252 7374 7368 5639 15372 540 18400 16386 18401 718 717 559 18402 6029 6966 2246 5421 197 9364 206 370 17062 176 3469 18403 11163 3105 1553 18404 403 18405 3079 18406 11134 18407 15384 3024 14292 18408 13312 5771 18409 13825 15921 6970 8582 4579 2263 458 8602 440 204 6972 7378 2472 401 17061 3094 12185
688 1191 6208 1237 8949 1302 5350 4648 6247 2554 6904 3720 483 2489 3702 8165 8210 7086 3701 1262 2419 1257 2504
689 3938 10040 3851 3939 628 3835 15735 2525 15086 3914 17419 15089 7458
690 18410 18411 1031 738 705 663 18412 18413 14768 18414 960 1028 965 18415 18416 1052 3018 9296 12344 2794 12214 18417 2793 2795 927 1050 932 18418 1056 1102 982 959 1081 18419 10616 10615 16578 18420 661 16342 18421
691 18201 13560 3554 3549 16000 16002 18422 18423 11493 18424 10583 18425 11388 2203 16006 3288 18426 18427 18428 14315 4914 1811 18429 3281 18430
692 18431 2712 18432 2722 17845 9987 14381 14423
693 18433 296 205 7384 8806 2292 18434 11164 458 2474 1477 4843 8593 6204 3765 203 3087 18435 9363 8681 18436 18437 8780 18438 8620 8666 17061 4622 13142 1612 17269 8772 477 1466 7394 12554 3732 12265 9852 8795 1076 970 15029 1843 6492 4048 2677 11100 588 4030 15740 1876 893 3958 2388 15251 743 2281 4012 1708 10872 15237 11752 2283 4133 1905 2961 468 8112 14605 16996 11386 18439 13915 1553 559 17863 6843 9440 14603 888 2387 15296 18440 4037 18441 2910 3561
694 18442 15035 6474 12873 4230 605 4042 6485 1072 15278 12342 18443 17704 654
695 8456 6082 6076 17139 18444 18445 1537 18446 8484 5195
696 3551 5234 18447 18448 5229 4970 18180 18449 9808 15593 18450 18451 2971 18452 5240 13070 5251 5250 12446 5344 12000 11989 4950 5243 14729 4900 18453 5256 18454 18455 18456 18457 5343 5030 6121 4946 5226 18458 5258 8364 9778 18459 18460 18461 5079 18462 18104 18463 5247 18075 4962 6124 5225 18464 18465 18083 3549
697 18466 2964 3328 1107 2097 792 8252 6052 4479
698 470 11476 992 628 2283 2406 1962 18467
699 1545 17209 1544 10953 8501 18468 5542 1546 4994 1493 8447 11629 17152 18469 18470 18471 1492 17276 15016 18472
700 2921 14329 1492 6076 6081 1463 5435 12498 1503 1506 1508 1509 17093 10953 3586 256 257 8446 8394 14323 17107 1309 6082 12645 14318 5687 17375 8402 5173 17077 1502 17335
701 2934 4175 3907 580 2395 5059 16239 3892 4117 16505 10420 6523
702 7725 9797 18473 12091 2662 7697 1811 7001
703 4819 4729 4827 4738 4829 4820 4720 4823 6756 4724 3618 12123 13814 15298 13985 14638 18474 13999 14000 4242 6768 12467 4906 4908 18310 9964 4828 6758 17699 18311 13813 12563 13976 13975 13972 13974 18475 14049 18476 18477 5492
704 18414 2913 921 960 9321 10017 4230 1064 2965 2923 18478 18479 997 18480 18042 2792 942 3013 4343 4203 18415 983 1056 9316 8312 4232 18481 12223 13919 3116 6738 1034 2939 10009 6485 2274 1910 13868 7182 7232 7155 18482 2821 2804 957 2988 10617 2966 18483 3117 18484 713 14475 2406 14449 1028 9192 2839 2728 2525 16418 1090 18485 18486 1051 1062 1101 18416 18487 1035 3014 3836 1027 18488 18489 1104 1072 3002 18490 18491 18492 2836 7253 15387 16770 17598 17597 18493 2748 7235 2742 2773 13920 4341 2692 18494
705 4281 18495 4282 4279 4278 4258 4259 4260 4257 6834 7423 4256 4261 4300 242 18496 9470 14415 18497 16067 16066 13273 11627 12495 15454 14432 15453 14461 14460 14463 15575 10003 18498 9990 2432 2437 4221 7777 3327 3409 16778 8027 14896 18499 6452 5859 2444 6987 9999 18500 4380 18501 978 4207 1010 17210 1014 16031 12525 18130 18502 18503 18504 3581 1017 5271 5272 18505 2651 1015 2652 2650 18506 16060 9871 9996 18507 5277 2656 18508 18509 1532 11719 18510 11616 12524
706 3607 4829 4720 4828 4830 4823 4724 6756 8760 194 204 6833 9740 2112 4519 3107 4611 192 10241 369 2090 18511
707 18512 4679 16544 18513 18514 18515 18307 161 18516 10525 9770 1169 16094 9793 18517 18518
708 16178 7701 7705 1537 8409 18519 1504 3156 14381 5120 12083 16184 642 2337 18520 9761 8266 10460 12228 18473 18521 12194 18522 12238 9772 16228 7712 7725 18523 9790 18524 7706 7704 16205 12241 9755 16229
709 632 3389 12694 8125 11542 1910 7940 3366 11969 2662 942 18525 2525 1076 8122 18526 18527 8123 2405 11554 18528 14456 2531 994 16348 8257 8336 469 18529 10009 10040 2667 12537 3372 1906 11504 7111 12900 4099 2396 2964 991 1051 2679 9314 1039 1034 6486 1061 18530 17423 940 9730 1081 3140 15076 2991 17422 2923 4030 18531 145 14597 2946 9298 1755 15035 18532 14444 12988 4713 2922 14315
710 18533 18534 510 18535 5359 14878 18536 18537 517 18538 18539 515 170 17815 10508 503 10482 490 901 165
711 1844 16604 684 685 16645 10414 2240 8537
712 353 12210 822 1628 2025 2001 8968 18540 3046 11380 6204 4422 4415 18541 4423 18542 18543 8055 11353 18544 8680 18545 18546 361 362 350 348 354 359 8067 18547 12283 6944 8667 6711 18548 6712 18549 13592 10279 4582 18550 18551 10324 6707 8573 4598 5192 18552 18553 18554 1996 837 1829 6142 13304 17893 8632 10308 8797 18555 18556 18557 18558 4792 16655 4822 4798 15334 4829 6761 4769 4827 4799 6764 5054 3618 16637 4770 5017 18559 4721 6758 16664 18560 12108 6757 4820 4729 5047 3611 12111 12112 4728 16641 4767 4830 3607 4736 6777 4738 5046 16877 8419 12109 12124 6770 4785 4730 4726 4768 6774 18561 5048 16658 4803 18562 18563 18564 3606 18565 4735 18566 18567 18568 18569 3192 7385 18570 2337 9298 18571 4011 1709 2936 2525 141 559 8803 12141 3795 8733 10227 12304 15905 10229 8802 18572 5713 4664 4663 12275 8683 8682 10411 15419 18573 15413 8661 18574 6559
713 11509 3335 13723 12931 18575 561 2375 3357 9298 10036 992 13470 887 873 1538 2044 9462 18576 4433 5111 7027 18577 9672 10610 4430
714 2708 7125 2802 18578 18579 17589 11843 160 1287 18580 3489 3501 7656 2767 18581 18582 18583 2771 5085 18584 17833 13841 18585 2775 4341 2769 2765 14383 18586 5084 2863 5118 5751 18587 642 835 13701 18588 18589 17857 8968 17516 18590 18591 2754 18592 9187 18247 18593 18203 17842
715 7705 14381 5120 12083 7286 16184 642 9814 18594 18595 18596 12430 18597 1538 10464 9757 9758 7708 7712 12229 18598 9746 7701 12242 7709 18599 3463 370 205 302 1588 553 775 189 6444 2096 6786 2674 814 784 1421 192 369 3420 307 373 792 559 12238 12234 12241 16229 9810 12088 18524 12086 7698 18522 7791 10466 16178 3156 7727 7781 17915 3170 16179 9748 18600 7717 18601 16205 18602 1755 2922 1933 18603 628 8337 3895 2525 9801 18604 3167 7572 18605 9753 18606 16197 12091 837 9754 7700 15048 7735 7703 16072 7733 3183 12251 9794 7920 51 1811 16186 10460 9773 18607 18608 16192 9797 9809
716 13721 6878 14823 1197 7092 1325 1162 5678 1151 8218 2626 18262 2607 1110 1109 1318 2181 1191 11307 1623 1148 2595 2608 6888 18609 6302 7104 1341 1451 18610 18611 9710 18612 5293 1139 1187 6333 18613 18614 6903 1663 1697 18615 10667 6339 18616 18617 13373 7665
717 18044 6984 6664 1962 2914 16041 461 837 14315 642 2337 7847 1165 4079 13021 13275 9264 1546 18618 14832
718 16683 18619 18620 17637 16681 18621 18055 13005 18622 18623 18624 18625 13858 13860
719 18626 6017 7536 3261 18627 283 3191 8094 13711 18628 1456 1215 59 7507 7531 7482 54 16209 7526 18629 6057 829 18630 2022 837 123 3744 18631 10802 7537 8350 5991 4672 9405 10973 10987 18632 6010 11056 8377 8077 5986 8087 11964 3219 1217 14662
720 242 18633 18634 5162 18635 18636 18637 5929
721 8614 5767 12302 2096 2075 1594 16747 18638 18639 13627 18640 18641 13908 16998 11172 18642 3097 4498 6824 7396 6576 398 764 6574 300 18643 14148 9293 14125 14181 331 14183 14145 2526 322 14142 14288 447 7390 4565 9359 4575 6419 5637 8774 8647 11380 18644 10302 10238 6931 3059 6614 2267 18645 5891 6616 6633 12554 2417 18646 16102 18647 282 16537 450 10469 330 13904 18648 18649 18650 17011 2263 6617 2322 446 16480 13340 14290 14208 18651 18652 8697 5402 6585 4630 2257 8592 10375 11112 8650 8658 9638 6642 9641 9649 9357 9653 12265 1797 2066 10356 16499 9396 14300 18653 2460 18654 18655 9643 2318 17190 6615 6612 8755 8753 8754 8751 5014 1784 545 13948 18656 1571 8738 13947 9962 1433 1779 4526 324 4606 1781 772 558 8748 1780 17002 2906 8326 3471 3266 12145 12259 8750 8749 8752 792 187 10400 369 11782 10271 6833 5996 195 3475 10269 192 18657 12436 13324 8803 6597 8800 18658 18659 18660 14196 438 801 10374 4579 15067 8615 18661 277 13898 2089 8628 13337 1624 8600 3732 18662 9392 18663 10301 18546 3044 12299 10279 5394 18664 190 8784 5422 18665 8773 6204 18666 18667 3031 2256 18668 765 2511 774 7355 6558 317 314 316 318 315 319 1438 8799 5399 13307 12272 12551 18669 11382
722 5530 10549 10548 10784 18670 10920 10911 10735 10536 10855 17409 10843 1806 11221 5214 10541 10792 10547 2203 978 4289 7666 10790 10926 11300
723 3013 18414 1084 2534 1036 9727 1056 12351 965 1811 9813 2525 3014 18671 1023 12260
724 16191 18353 14004 11771 1904 13202 2944 13180 1818 1946 9989 18672 1981 2396 14700 2956 2036 1708 15492 2954 818 11476 16361 715 3316 14672 18345 7262 17653 11104 554 3831 14731 2491
725 2945 18673 605 10062 6492 6491 4542 4747 4906 564 18674 1912 8838 8464 17308 2933 12260 18675 18676 10875 12914 18677 13396 7872 9926 877 2032 893 16217 1165 585 6673 1770 1759 18678 17647 3377 14773 18679 283 577 1635 1322 1288 18531 8329 14634 11465 4019 4010 3901 18680 18681 1064 3006 17517 697 2410 18682 15341 629 600 5137 9328 3970 18683 18684 8705 8095 160 1863 837 2027 5523 18685 2025 5507 5510 6744 6748 14974 1875 4018 16613 15260 10441 18686 2924 17737 571 3933 149 4023 18687 722 5188 1504 1268 3814 18688 1609 1169 18689 13380 18690 1885 4037 1897 18691 1068 15099 1078 1753 18692 9335 602 4063 1896 7951 1899 18693 2962 18694 18695 2973 1836 15471 6844 8337 9313 608 18696 11796 7745 991 18697 1079 18002 4545 2365 11527 18698 12725 1963 15865 10044 8142 3955 1893 3195 1945 2283 3912 12567 461 17610 2942 3931 1709 18699 16575 18700 18701 15274 13423 14002 18702 13348 9914 2337 15697 855 1772 11547 18703 870 1842 5287 16048 11718
726 18704 18705 7836 2337 141 16273 16840 7628 18706 16315 18707 16265
727 1169 7333 16896 4297 18708 18709 13040 11632 7313 18710 12963 17045 7924 13044 18711 7427 247 18712 18713 18714 18715 15532 13710 16897 18716 16898 4254 7424 7420 18717 266 18718 240 18719 18720 16899 18721 18722 5946 4328 4329 242 7312 4309 7428 2681 18723 12210 16602 16346 2525 2493 18724 18725
728 6560 14256 8600 13912 10309 1475 9392 18726 10278 10302 8056 12304 15418 18727 18728 1321 12130 18729 18730 4598 13887 8574 4599 8573 18731 11779 13661 5192 18732 18733 18553 18554 18734 18735 18736 18737 18738 18739 18740 18741 18742 18743 11780 18744 12279 9642 8676 8728 5145 18745 18746 18547 8636 10317 8672 6634 10277 8661 14777 18747 14231 1468 9607 8683 18748 11353 18649 17906 9822 18749 16982 9364 1594 12301 11386 18750 4841 8798 8799 6581 6583 6582 8680 9861 12134 13152 8070 8071 13136 15906 4579 13314 18751 18752 8603 5423 18753 12265 2292 18754 8632 3044 12303 8051 18755 18756 6559 16535 3059 7352 12282 18757 14789 13253 18758 559 18405 18759 15222 16099 18760 18542 2464 203 6943 6980 12554 13915 11376 18761 13144 18762 18763 10226 18764 12141 18765 6654 13128 9393 3795
729 18766 18767 18768 18769 1538 9227 18770 837
730 3166 13354 13353 18771 17795 7660 7789 3147 9763 9762 7791 9771 7576 3169 18772 7747 9747 16324 8199 7663
731 8269 3914 2970 18773 14446 2662 13376 15245
732 4623 18774 18775 6375 6398 13875 805 4584 18776 13923 8773 2323 8616 1468 1571 10303 5636 11179 15374 3105 458 802 1428 8070 18777 12304 1553 18778 18665
733 10765 11232 11288 11287 5478 6753 11286 5458 18233 18228 11265 11285 18779 11233
734 5811 559 6548 9128 5812 8573 7983 4599 7844 11784 16784 2323
735 12707 733 14597 1087 675 15471 8254 4185 18780 1098 1894 18781 8112 18782 14477 2942 15238
736 2525 12862 9316 12855 283 1986 1811 12335 2396 15465 9362 1577 2362 1436 6608 3023 3042 17420 2332 2337 8429 5138 5948 2908 4878 4882 12851 12863 6011 18783 10593 18784 18785 15600 14310 4327 18786 18787 931
737 18788 18789 4531 5879 18790 18791 18792 18793 18794 18795 6454 18796 5449 5557 18797 4593 14505 18798 18799 18800 18801 18802 18803 18804 18805 12456 18806 18807 18808 11248 5475 12453 10140 10146 2203 283 18809 18810 18811 18812 18813
738 11232 11449 5478 5450 11287 10536 11245 10765 18233 18228 11285 5557 10223 10221 11286 11226 5502 11320 11257 5531 5474 18235 11281 11400 13762 5483 13765 5530 18814 5560 10787 5458 5485 18815
739 11 18816 18817 21 15787 10636 18818 1242
740 107 18819 10989 8356 108 16211 11939 13717 18820 8106 10785 369 2097 10249 4494 192 1210 1780 6833 1784 4353 6131 302 18821 208 10250 18158 9782 196 5998 11688 619 8073 7608 10974 7508 123 18822 7514
741 18823 11284 5471 5482 5459 18237 18824 10892 16455 10948 18825 11314 11266 11281 18826 11295 11232 18827 12452 5530 5472
742 18442 18705 4171 18828 1033 1925 1023 2387 1842 13406 12707 3121 880 870 13034 673 2493 18829
743 6714 129 3648 1130 1127 3637 6182 3635 3658 1292 1230 3707 8258 5653 1183 8036 8037 8035 18830 8039 13528 8038 18831 18832 5147 18833 18834 18279 18835 1182 3684 5678 1325 2626 8218 1232 1151 2625 1302 1162 8217 4450 3704 18836 1413 2455 15503 1148 1299 9497 6245 9561 6094 1644 18837 2634 1288 7085 7091 3702 3701 14159 18838 4364 6091 2575 18839 1415 18840 2191 12668 2232 18271 18841 12094 5608 7113 1294 12608 1220 1692 2588 9037 2477 9042 9041 9038 1674 6252 2593 7096 7692 9045 7688 2592 7657 9043 6699 8801 9932 18842 18843 422 1401 416 5844 429 420 418 423 426 427 430 431 432 6330 340 9076 419 425 131 1346 392 6306 424 6298 385 393 338 5843 3487 18844 10693 18845 18846 18847 9174 4583 8773 8660 6968 18848 13081 4635 1327 18849 13086 10549 10548 11262 10128 11251 5536 11224 10700 17747 5462 3746 13873 18850 18851 3745 18852 9550 9554 18853 14744 11935 10055 12999 18854 18855
744 15101 18856 4207 18857 18858 16246 7473 18859 17416 18860 10423 18861 18862
745 10713 5478 5528 10551 11812 10223 11651 18863 10147 10536 18864 10765 18233 18779 18228 18865 10174 11802 9981 18866 10742 10899 18867 18868 10175 13762 18869 11233 11400 10547 11266 10722 10586 18870 11285 5536 12452 9986 10588 18871 5531 10583 5547 13652 18872 5459 5487 11800 11241 18873 18874 18875
746 6489 3386 1047 3013 12343 667 8322 9337 1064 18876 9725 4203 965 2534 9314 18877 3367 9727
747 10652 15355 1208 369 1789 12376 192 2058
748 7431 18878 8985 5340 7776 11637 18718 239 18879 18880 266 9580 4332 7305 7420 9576 7424 7322 8991 18881 7926 7425 18882 18883 18884 7426 18885 18886 6988 7061 288 18887 4362 8453 3810 18888 12639 1503 12628 12627 10953 17079 7120 17084 18889
749 129 3487 6560 4571 13525 6424 141 18890 18891 11072 1242
750 12214 1104 666 3872 656 10017 3944 3352 4047 1072 587 4203 1066 3954 15491 1741 1538 246 269 267 4271 3985 1069 2534 671 18046 1798 15088 3132 651 3316 11483 10048 4029 18892 17996 4048 2679 18893 5317 2380 4006 12972 4117 3986 3970 1708 9726 3973 4139 11106 1097 18894 15106 3941 13218 4159 870 4036 15252 18895 592 4905 4003 6517 17422 6477 18896 15360 18897 15497 18898 11870 3328 692 15487 11522 991 7459 14787 12978 2056 559 18899 4567 11153 1428 3024 1473
751 17556 2203 5560 5469 10217 10737 10739 10738 10740 10744 10746 10747 10743 10745 10184 10092 10742 10185 11435 10783 10192 10193 10190 11296 10936 11822 10919 10760 16888 10102 10902 11407 10939 11809 11398 11799 10098 13055 10557 10119 10096 10179 10538 10531 10532 10718 10201 11450 10764 10768 6753 10767 10772 10775 10776 10774 10769 10773 10771 11210 11219 11208 11207 11209 11217 11218 11212 11213 11211 11216 11215 11214 5524 13052 15544 10121 5553 10156 10174 10175 5501 5537 5487 13053 15541 13064 10090 10116 10906 10117 18900 10166 11317 5528 18901 10165 10224 11268 11305 18902 11271 10838 17550 10837 17554 10559 5532 10922 10218 10741 10094 10093 16402 10782 18903 18904 18905 10565 10560 11311 9974 10582 10941 10211 10731 5448 5447 10835 10789 9980 10942 10212 10544 9982 10542 10291 17549 11197 9976 10755 10909 5536 17557 18906 10215 10836 11272 18907 18908 10130 5457 5486 11269 10551 10151 10159 10158 10157 10154 13950 18909 10155 10150 11411 10152 11259 11260 5456 10120 10911 10901 10918 10162 13063 10171 10945 10113 10903 11304 10164 10163 10112 11302 10556 10203 10114 10715 18863 18910 13051 5470 5505 10847 10194 10091 10530 10529 17560 9975 11395 11394 10904 11300 11452 18911 10730 10781 11298 10732 11270 10223 10209 10554 10555 9981 11220 10581 10777 10587 11428 9985 10727 10750 10726 10834 10778 15192 10833 10725 10576 10173 10196 10547 15194 17552 17553 10108 18912 10723 10144 10722 10133 10721 11225 10915 2201 17559 10910 10935 10758 10756 10724 10757 10539 10850 11416 11196 10780 10932 10779 11203 11240 11204 11244 11201 10710 11246 10109 10537 10714 10787 10575 10540 10832 11235 10534 11316 10115 10204 11280 11293 10545 10543 10293 10292 17564 10716 10562 10711 10563 10561 10564 10566 10702 17561 10736 18913
752 10753 6439 8179 1227 2553 1596 17407 1307 2498 7092 18914 17872 1679 1694 18260 5352 4432 3432 18915 2573 5347 18164 192 370 2136 302 18916 2119 15994 6384 1625 2195 456 10689 9248 18917 16160 2418 18918 2621 2207 2197 1112 18919 18920 7558 18921 8959 5353 18922 1294 15942 6901 5700 1125 18923 1326 1194 5694 12423 14946 12422 18924 6918 18925 16804 18218 2580 1176 4614 15940 1336 15968 7093 2599 18926 16799 18927 16386 18401 283 16793 18928 2626 5354 1676 18929 18930 18931 18932 18933 16165 7554 6111 18934 18935 18936 1287 160 2525 3121 8240 18937 4236 9693
753 8339 13388 3261 6423 2273 8312 10442 10038 2413 571 591 1837 1735 18938 4045 733 1820 18939 3011 9167 11954 8316 18940 18045 13065 9163 754 1070 1069 4784 11520 3994 14721 18829 7929 1965 565 2396 18941 4111 7955 15472 11509 972 2525 283 12438 1811 16884
754 18942 18943 18944 18945 18946 13199 16019 18947 18948 857 842 3958 1971 12537 2041 2042 7962 15268 1718 1883 821 13021 18949 17644 18950 18951 10635 718 6813 198 525 204 329 11134 1791 8612 6589 1556 1553 2251 2263 12544 4649 3024 2317 315 314 316 318 317 319 10338 529 11136 9348 1602 440 2156 2157 2160 530 539 18952 17327 4221 301 400 18953 619 766 765 18954 208 553 296 292 12144 2247 545 2324 1831 548 796 1208 302 2074 2319 16524 6823 369 779 776 778 6557 1795 202 3226 1792 2071 1442 1425 196 1785 2088 12378 2078 3133 1552 2305 189 176 2472 767 195 192 2058 290 2482 795 187 6593 792 205 194 800 3099 368 559 3423 1538 18955 18956 18957
755 18958 18959 18960 13024 18961 18962 13039 18963 3605
756 1242 160 51 1609 15600 18964 18965 2541 14687 11944 6099 2614 18966 18967 1287 978 18968 18969 1690 11138 2599 18970 15944 18971 18972 18973 18974 5147 5347
757 583 1913 18975 571 18976 3956 3857 3352 12200 1986 6518 1042 8310 18977 10452 18978 3229 13686 14764 3390 3396 18979 15116 2372 14023 2532 18467 7913 2525 18938 15035 6042 3315 16939 3195 13965 15914 4002 13916 12985
758 10902 10116 10760 15199 11230 10108 15198 10792 11283 6444 775 192 3072 3047 3070 6607 6128 2906 6133 17059
759 10549 10554 10849 10173 10537 9982 10563 11424 10711 5505 10847 10091 10547 18913 10926 10557 10575 10540 10196 11246 11252 10925 10710 11200 11201 10787 10843 10835 10559 10222 17564 5558 10920 11435 10578
760 18980 18981 15711 15708 12365 18982 18983 18984 18985 18986 18987 12374 18988 18989 18990 18991 18992 12386 18993 18994 18995 13272 18996 18997
761 18998 18999 19000 19001 19002 19003 19004 19005 19006 19007
762 11555 15268 692 10694 2365 4545 18532 2525 822 11535
763 19008 12522 19009 18948 10630 19010 138 8906 13021 15598
764 8178 2579 2612 1253 6220 19011 2976 2503 2582 5675 3701 2611 11111 1191 19012 4469 1193 9497 3753 5534 10758 10717 1292 6100 1302 2601 1249 1322 19013 2232 4549 1194 1295 1242 7481 1257
765 19014 11998 538 809 1601 4610 2363 12440 19015 19016 19017 5440 16000 3554 5030 19018 4962 5269 17193 19019 19020 19021 18447 404 623 5426 718 19022 4930 12012 19023 18081 5250 19024 5452 3092 529 14191 3070 10057 19025 19026 4974 12449 16006 2971 19027 5100 19028 7155 7272 1437 559 19029 2824 7301
766 19030 19031 19032 19033 19034 8174 7344 19035 14905 19036 19037 19038 5926 19039 19040 19041
767 11920 7525 11333 5244 19042 5237 6004 2472 553 208 5703 301 2891 2892 293 176 5995 4516 1779 19043 292 1706 778 779 306 2247 791 1442 1783 2065 1445 19044 369 9367 290 9373 805 2299 187 792 11343 767 397 192 6207 194 307 8767 3092 1427 559 1352 563 11351 11347 15290 1217 17165 11930 8353 15041 10971 15042 19045 1017 18509 2656 19046 19047 5279
768 2365 15360 1995 3154 577 1870 953 19048 4434 5140 6076 19049 16176 4289 13217 18686 2959 653 5058 2937 3366 2675 18979 15514 2962 293 2324 552 1831 302 5887 805 779 3096 2097 2299 8597 814 559 11477 11571 3263 5446 4039 3244 12902 3313 3297 17733 632 14700 19050 146 2963 2922 19051 3352 155 19052 283 8369 1829 1965 873 4223 1538 817 19053 2340 2339 19054 13835 2341 5318 2956 2680 18527 7940 874 711 3397 3833 818 8906 15853 4198
769 6423 643 11647 15596 718 7913 19055 141 19056 10856 9199 4409 4407 2332 674 4142
770 17899 4567 2266 18726 4585 12149 7357 12299 12295 10227 11353 18746 8772 6626 8651 3795 3101 19057 8605 8771 1612 19058 19059 15421 19060 1618 19061 19062 13319 12273 19063 8053 15429 18649 4579 190 19064 19065 6808 14169 6625 8050 8638 18550 19066 6624 15919 10323 19067 9392 11382 17895 141 2525 1941 991 733 714 16648 17992 1822 745 12003 1821 14718 969 1933 19068 2337 1594 2896 9364 5410 12323 4575 12282 13874 3732 19069 18542 4565 17054 8792 10340 18749 2263 8052 8055 15418 8631 12276 9650 12286
771 2687 2692 2691 2686 2863 2736 19070 19071 2708 2702 5747 19072 12899 7236 14384 2697 13643 12898 5097
772 19073 4246 19074 9571 7310 19075 19076 19077
773 7485 3978 1036 19078 924 9346 992 14511 2961 1097 668 1056 15077 1716 1027 11533 3200 9321 9989 12593 3950 3246 1095 957 2365 8375 14722 12332 566 15633 466 15742 1037 4188
774 19079 19080 2363 19081 5326 19082 19083 19084 8251 18898 992 12691 746 469 744 19085 19086 2972 2053 19087 14735 16331 12072 19088 16273 19089 19090 19091 16262 4702 12100 12057 14742 12049 12022 13556 19092 12058 7631 16319 19093 5094 17739 16321 13846 19094 10968 19095 19096 12889 9318 16602 19097 19098 2635 9316 12862 12851 19099 5337
775 17579 19006 18999 19100 19101 19102 19103 19104 19105 19106 19107 19108 19005 6983 19109 17498 19110 19111 19112 19113 19114 19115 16737 19116 8864 19007 19117 19118
776 16738 19118 17497 19106 19119 19120 16737 18999 19121 19007 19122 19123 8864 17579 17498 19124
777 19125 16146 16688 16687 19126 12953 16437 19127 14398 10655 15447 8936 15768 3598 16693 9 19128 4700
778 18295 4082 3533 3881 10041 2276 1852 1850 1857 1845 1846 1847 1848 4049 917 19129 10872 654 3559 7262 18480 9296 8251 991 3898 2396 1906 2675 2938 19130 9726 19131 4230 19132 6495 19133 19134 4037 3397 19135 3370 15514 3374 15013 3411 3409 12731 6079 14329 6081 13477 1492 1509 257 1527 258 1513 1526 256 17391 19136 1500 1463 1270 1508 722 1095 3952 16345 1849 1855 4345 2983 1061 4203 6507 1843
779 2637 6520 4782 742 11469 7486 1721 1718 4080 1720 1723 1719 1764 1725 1724 1726 1732 887 707 1755 1728 19137 8253 18525 8269 8268 1729 14511 19138 650 19139 693 9322 4003 11478 3234 3229 8310 736 842 7832 19140 15636 19141 12984 13952 3394 13206
780 9900 14403 14410 14402 14407 10817 10824 11877 11563 12167 18117 14401 13687 17507
781 19142 2738 15387 14445 19143 17446 2712 7613 2737 19144 19145 2739 19146 2824 19147 19148
782 11264 11259 4858 5553 10848 10153 10102 11303 10950 10091 5554 10788 11260 13087 10152 5478 283 13240 14980 8522 7721 2337 1811 15198 13941 10892 10759 5216 10735 10159 10783 5451 10551 9984 2263 5536 10547 545 195 13947 2081 622 547 6130 5650 2895 2097 13949 5144 192 4461 12222 10128 12452 10215 17414 13650 10702 5547 5456 10123 10742 10140 10757 10156 13950 5551 10843 5532 5488 10209 10902 5470 11318 11314 5485 10130 8728 1601 1332 11400 5538 11434 5455 11820 5487 2203
783 10541 1638 1674 5557 5485 5460 12452 5484 10583 10551 5472 5533 375 2162 10554 5536 10723 9118 6550 11319 19149 5561 5501 5547 10128 18875 19150 19151
784 4258 4257 274 6834 4281 4279 4282 4300 4259 4260 4278 7423 4261 4306 11646 12932 3012
785 4531 19152 19153 3191 3730 8076 7541 978
786 19154 7700 7711 12092 3155 18595 7658 19155 9760 9755 2662 19156 19157 4676 12241 19158 7739 14515 19159 7733 19160 19161 7664 7709 16197 9805 18473 9796 17767 7719 7732 7782 7674 7737 18599 3146 16185 12247 3162 7694 19162 17494 9772 9748 5094 16181 19163 19164 12231 12243 7594 3169 19165 7724 3143 7791 7728 9798 7702 9806 9793 1811 14393 17976 7668 19166 10468 10461 19167 9797 9763 19168 16230 18772 3161 7789 7781
787 19169 19170 4938 3550 5228 19014 14589 18105 19171 8344 19172 4936 4955 19173 16978 19174 19175 19176 4937 4956 5065 18061 19177 19178 18448 19179 19180 18447 19181 19182 9832 19183 19184 10079 19185 18086 4962 4965 11922 4960 19186 19187 19188 19189 10073 19190 19191 19192 19193 10054 19194 19195 4975 4974 5230 19196 3552 5246 13300 19197 11999 19198 19199 19200 10063 19201 10088 18085 19202 11998 12016 19203 5453 19204 9778 18098 19205 19206 19207 7916 7913 19208 5601 7989 13677 7801 8537 8536 8542 19209 8539 16570 12444 7681 5466 5562 17534 4416 7743 5465 19210 19211 19212 13929 19213 7914 7918 19214 12730 19215 19216 3011 19217 19218 6122 19219 11041 5224 5223 11049 11048 5225 10082 19220 19221 19222 12009 12015 19223 19224 19225 6364 11931 19226 17134 5430 1497 19227 7120 19136 17081 17391 19228 5172 13839 19229 19230 4944 10065 11935 12999 19231 19232 10830 2971 19233 19234 17499 4984 19235 4964 7610 19236 5344 5226 19237 5227 18456 4977 4978 6110 19238 19239 19240 1026 12471 19241 1024 1025 12519 12472 14436 19242 19243 14419 19244 3580 19245 11719 9435 1010 1023 19246 5244 11039 19247 18091 19248 4988 19249 19250 19251 19252 19253 19254 4952 13068 6363 19255 19256 19257 19258 19259 4900 18453 19260 4930 19261 19262 19263 19264 19265 19266 19267 2972 12532 19268 1082 19269 17523 19270 1090 1084 9715 19271 19272 15694 8383 924 19273 19274 19275 7824 19276 16565 12441 12443 19277 8382 12223 19278 19279 19280 1039 951 913 2635 6487 12825 19281 19282 5256 4935 19283 6120 19284 18467 11880 19285 8551 1277 8458 19286 5202 19287 18241
788 6044 10804 1609 10806 6072 11004 15622 19288 15602 19289
789 991 13166 7054 7022 5112 9661 16284 8190
790 3924 1845 3363 1846 4046 14514 624 1798 1842 1824 9302 3833 3909 3910 3558 3555 654 4124 2415 4077 3561 3911 9332 4122 4006 3556 1847 1848 6516 11091 605 1853 3920 4052 3827 15472 4053 1768 3927 3923 3922 16613 3925 3926 13587 15090 2657 3921 1850 16614 15511 1852 3928 1851 1849 1857 1854 4051 19290 4050 2378 19291 18304 11509 16574
791 16206 11056 5983 5982 6019 18629 7586 7603 8084 5984 7513 124 567 1537 5430 12476 1500 19227 3800 1502 257 1513 12491 1526 258 1527 256 1279 1504 13599 11057 8072 5990 19292 7125 4340 4341 19293 642 6011 19294 8081 6020 3276 12019 5030 5338 11988 5065 19295 5452 18059 5075
792 19296 18790 19297 19298 14886 1609 15600 6070 6072 14062 14897 19299 14071 5879 19300 19301
793 17375 8486 19302 2649 12653 12260 13677 7894 602 7634 468 19303 19304 1683 6081
794 1914 848 635 16104 670 9889 629 1811 9962 805 369 373
795 1056 930 14768 2799 18418 960 19305 997 3116 19306 3616 3611 3607 8418 4818 4828 4829 11604 2524 2797 12870 1029 4230 1064 12355 10031 19307 13919 692 957 7989 14769 12595 2337 10017 12534 19308 17922 1099
796 8095 722 1537 718 19309 14013 15466 18474 4906 4545 19310 19311 14640 4895 19312 4891
797 2702 2711 5102 2739 3127 5740 16756 5739 7257 16777
798 5096 12595 3127 2739 5740 19313 642 4909 14037 17716 9163 4543 4764 4820 14687 19314 281 51 718 2337 978 19315 19316 1654 165 12603 513 161
799 2525 15115 554 14514 3185 3252 2676 8269 7680 3143 7733 11866 3175 16181 3156 1764 9458 3533 4090 14456 1027 1818 3323 1893 3880 10872 1870 2380 3955 605 3895 3899 7700 9797 18523 7728 7720 12091 2754 7283 7164 7134 19317 5113 14663 16288 17321 17823 19318 16597 19319 3147 15047 7791 7673 13354 15048 9763 19320 7709 9772 16197 12089 7782 16072 3120 3322 1032 1739 13196 1755 16196 16076 12231 10463 7704 461 4079 12696 11479 7638 1933 8268 2387 15266 8015 2917 2409 7706
800 13925 19321 12786 12869 701 1033 561 628 11908
801 9111 2180 4503 3643 129 1336 5614 1230 4342 5177 8554 16983 8026 17285 19322 19323 6245 19324 4424 9497 1236 7682 19325 8278 4363 230 222 216 6098 18830 8041 8040 2590 3633 4551 4538 19326 5608 6223 19327 4510 7846 1297 6224 15499 11749 1165 8171 215 19328 19329 3749 19330 1232 6916 19331 19332 15442 1233 1302 1325 2580 5756 19333 19334 14271 2199 1261 14303 828 2019 19335 822 2002 7209 19336 19337 827 19338 829 837 1996 19339 976 19340 2208 1137 456 19341 2337 19342 19343 6232
802 9392 18749 4571 4624 6611 6614 310 6613 446 6570 1560 315 314 318 317 316 4832 4833 319 12157 9395 18649 19344 6029 8594 19345 10304 18753 17906 7198 301 766 6641 11639 4272
803 160 5520 559 7079 5705 18313 1064 2635 12593 1149 8958 8992 19346 2206 9108 12903 15956 19347 19348 9111 1251 6185 19349 806 2563 1143 189 129 4230 19350 2545 8977 8794 6250
804 19351 19352 11624 19353 19354 1014 19355 19356
805 837 15024 2337 559 2289 369 2094 5884 189 19357 302 323 1445 805 4611 6824 19358 19359 7676 7649 2525 2397 7452 8253 564 1755 2491 7745
806 978 18767 19360 19361 9998 8170 14425 19362 1022 11719 15098 1010 19363 165 10524 161 501 9770 500 502 3589 504 19364 506 19365 514 517 515 485 19366 484 19367 904 10485 19368 10475 10476 10486 5359 19369 10519 14877 170 19370 9527
807 2532 10694 51 978 3221 19371 19372 5030
808 16615 1749 16027 669 13840 4021 3955 17990 14773 1738 881 893 2947 6520 1915 2938 3849 703
809 4053 692 3329 12564 820 16034 607 6477 2350 2958 468 8341 647 14696 564 13919 9444 4149 5058 15217 12264 9441 651 654 2525 7466 4117 2492 7260 1983 2917
810 305 5015 2323 12514 8692 13862 19373 9817 3768 19374 10362 2903 3049 17270 10374 13323 13915 2362 296 3133 1552 2242 16485 1608 1464 12549 1706 11136 3469 397 13682 1604 780 4627 447 15250 1592 4610 406 205 176 204 5377 2321 19375 19376 1589 5412 11115 19377 19378 4200 4194 18957 19379 19380 19381 19382 19383 4202 160 3044 2071 2467 14235 19384 2289 809 2073 6589 550 13211 3096 9624 370 807 19385 3472 5423 19386 7358 1594 1421 2511 1444 3031 6641 402 12179 3092 19387 19388
811 19389 19390 19391 11738 18788 18811 19392 19393 19394 19395 19396 19397 6216
812 4498 299 371 7366 6603 6580 6605 6557 6597 1615 2346 6602 9608 536 374 313 6604 6606 312 3093 2317 11167 7388 3788 5004 5006 5003 3097 409 406 2142 5379 7365 410 8585 8781 19398 438 6571 5008 408 6587 2156 5007 407 311 14516 6579 6590 549 531 6381 6371 439 5617 532 411 6593 2465 412 802 6125 8207 4629 768 1571 2157 1591 3031 6589 7347 373 2324 10384 450 19399 1617 3049 1428 4598 5565 5566 10350 6648 204 537 3052 2268 8659 9648 19400 15473 9295 10353 6635 6607 6637 2141 8884 6572 2483 1594 525 6647 19401 19402 6638 2127 3739 208 2269 19403 328 5778 545 192 1208 8744 8743 8745 2892 1425 8758 195 1442 553 189 3471 18821 292 792 451 1607 19404 2067 8890 6653 356 359 349 352 354 360 19405 10367 3107 1831 1437 8622 296 6570 176 477 10798 6640 187 2315 186 11153 11172 1438 2242 12538 197 4625 1589 8593 18144 547
813 19406 19407 2007 12801 19408 15753 2533 837 4939 13066 9778 19014 16000 15387 12613 16291 19409 11977 14663 7055
814 10787 10726 19410 10735 10536 10711 11815 10209 10791 10291
815 5293 1223 5799 18149 19411 18314 8249 19412 10020 10517 5313 9156 15981
816 19413 3149 3169 11448 11313 5678 10223 10580 11197 10848 9982 5457 10130 10128 10547 11410 11298 10782 1330 11435 7728 18595 11424 12034 12033 19414 19415 13440 3192 11822 10529 11226 11277 10538 10532 10090 1148 1302 19416 5458 9985 10756 10108 5536 10783 10843 11427 10714 11389 11388 10534 10731 11805 5470 10291 17549 10186 1549 19417 1504 12498 8394 9466 19418 14911 1680 1687 13489 5685 18240 19419 17214 17146 1682 1537 5194 1236 15528 11736 10716 5448 10941 10788 10722 11810 10577 2337 19420 13438 19421 19422 8536 5479 19423 1165 1169 160 18826 9986 10543 11423 11274 5560 11390 5532 10849 9978 10569 11452 11392 11426 11206 17556 10292 11806 11425 11279 19424 10575 9979 10586 5534 19425 10997 10996 10971 7525 9006 4638 10215 5503 9975 5447 5524 10907 10904 11393 18171 11254 10890 11289 11230 19426 19427 13061 10554 18236 18875 11250 11196 10211 5528 19163 10732 19428 18231 15550 5541 3538 6194 13051
817 2687 16755 19429 19430 19431 16754 19432 17775 17791 9183 9187 5120 19433 17825 19434 19435 4556 718 11891 10694
818 1029 554 4039 10041 15251 15053 12931 3335 18575 1933 9335 1974 3873 7904 11101 13470 17971 19436 7704 7667 3155 697 11557 13484 1739 3129 686 865 13183 8302 8537 19437 19438 4416 10460 7709 9772 7782 16549 873 18303 1749 671 605 3872 19439 2530 13444 10059 11103 18000 1863 627 692 11091 4344 2917 13196 1730 18682 893 3965 2493 7725 51 978 16072 8267 744 8268 2387 207 3463 775 2116 2895 553 814 2096 1428 176 2085 192 4353 307 306 189 302 316 369 559 9755 9748 7713 17493 15004
819 13223 7810 7837 19440 14437 7457 5604 17673 2336 12910 19441 19442 16368 19443 16374 16383 13220 13242 18356 4757 19444 17408 978
820 9898 14408 13696 6450 10828 11563 3332 16613 5962 15288 2018 2007
821 1242 160 11111 19445 1537 13693 13696 16984 1468 4569 17012 3304 559 4207
822 6189 19446 2364 2373 6771 4828 6760 4728 6777 6757 6776 3611 6772 3607 12112 8417 16236 5017 4726 8418 4818 4820 4729 4819 6758 4721 4829 5048 6756 3618 16235 3617 12110 4791 4792 4738 16868 3609 19447 4785
823 5190 5216 11236 5530 10128 16455 5471 10780 10779 11416 17562 10925 10586 10549 10548 19448 19449 10911 13766 19450 18824 19451 18233 10134 11394 5538 10144 10914 19452 5469 10122 19453 11319 5459 10923 10125 15196 5484 11811 11260 13765 11224 11799 12452 17558 10819 11206 10904 19454 19455 10772 5547 3795 1594 1336 11220
824 3949 15600 6070 6066 6061 1022 19456 13273 12495 13299 13274 9998 3581 3572 2656 3569 3192 7947 13217 4021 19305 1011 11897 1024 19457 1909 466 14600 4161 4044 932 19458 9720 10597 1941 637 5004 525 197 1831 8291 621 681 19459 469 1933 12702 7948 1065 19460 4256 4259 4260 6834 266 4267 4266 7431 19461 274 19462 18023 7422 7420 9574 4250 5340 243 11636 19463 11639 245 4272 7306 5439 3065 10813 269 272 4268 4269 4271 4284 259 19464 18495 13702 1538 8313 10045 679 19465 9473 19053 19466 15242 2925 4092 4119 19467 15007 9330 3385 677 14609 1029 2963 991 673 7897 6687 877 10414 4186 675 2283 19468 15515 19469 12699 1853 14703 2530 11090 19470 9471 6500 10600 18009 1903 13845 1062 159 12586 9814 7725 7713 822 17516 8966 8968 19471 2273 2274 2275 1910 19472 571 3202 468 19473 2965 11471 464 1714 14699 3355 1067 594 591 4776 1735 3993 10594 3989 4003 2637 6751 4111 11757 6691 19050 1870 18337 9480 7939 4079 12697 17879 951 15312 15682 6486 6844 15313 5136 7452 2282 1930 19474 7847 7829 16847 19475 14791 19476 7825 2404 2994 3332 4205 15866 19477 942 2790 472 1926 2529 13165 2281 18671 12928 12904 8537 10021 12260 19478 18208 3811 3810 1493 9890 15523 2671 553 302 545 2249 1478 3096 201 775 619 6830 205 187 4651 307 1792 195 192 369 1428 792 2484 19479 9456 14792 145 736 543 8276 1811 19212 7922 7720 12226 1609 15564 12501 17146 6079 1277 1509 19480 1502 1492 17287 19481 722 19482 2990 19483 19484 15004 937 2664 11104 15871 4230 3407 3404 5111 4430 7007 12573 19485 2680 577 691 690 1852 1851 1848 1847 1855 1857 1845 1846 870 624 19486 12200 2988 9731 1104 11787 917 817 6739 3010 3914 3937 992 19487 11591 14449 3533 13179 7619 7954 19488 17999 475 1938 19489 600 4203 19490 692 10050 4128 19491 9714 11675 19492 8239 8274 3375 9298 734 10009 15082 19493 19494 2991 18480 609 19495 958 9729 19496 7054 5112 5114 17230 17229 14765 1878 11482 632 12225 2786 19497 2337 19498 16571 13501 8257 9877
825 11320 10554 18237 10925 10159 5531 16455 5488 11233 5456 10898 10095 11260 10128 10132 5457 10937 5536 10579 6753 19455
826 10173 10536 9984 10843 10196 10835 10789 10579
827 19499 19500 19501 9185 16040 19502 19503 14654
828 9772 7727 7920 623 15427 559 6800 6149 6797 11078 3182 4419 12227 1811 2929 542 3397 1821 1933 7745 14510 13484 2491 19504
829 14029 19505 8522 19506 19507 12595 13225 296 3092 559 13997 5604 14002 9967 7831 718 17463 3281 160 19508 850 16374 19509 19510 14640 17654 19511 7650 13982 5588 7822 19512
830 19513 19514 19515 19516 19517 19518 19519 7270 3430 19520 15139
831 19521 1165 19522 13567 5365 1169 575 19033 19523 19524 9793 12520 19525 7344 19526 2220 8170 19527 19528 19529 19530 8174 8720 19531 19532 17803 13998 1264 643 16004 3288 15408 19533 16006 2971 19534 19535 19536 8722 19537 6789 6794 6790 6792 6793 6791 19538 11914 19539 10830 4950 5233 5225 3551 4956 8363 5079 13072 19540 5030 18458 19541 5226 19542 6121 12399 10081 4946 19250 5343 5237 718 19543 6423 19544 19545 19546 19547 19034 19548 8708 8707 12522 10699 283 1933 1755 18603 11797 628 8267 707 3382 10040 1726 991 714 3205 11512 887 7952 571 13569 18004 673 18005 19549 674 934 10416 4186 3594 675 677 676 678 7264 679 680 1087 4037 681 682 683 684 14597 685 686 1843 687 688 19550 594 2525 3261 19551
832 9652 19552 9639 16270 5328 5336 1698 1699 15969 9247 4535 6112 6919 5629 10753 1123 4546 10752 1703 15971 15945 6297 6640 13671 160 8095 718 10247 19553 6558 9295 18748 141 19554 16263 16269 10966 2908
833 2849 19555 5081 2717 19556 5741 19557 642 2739 18493 2773 5740 19558 5751 2692 12893
834 19559 1010 722 19560 2694 7185 7238 13951
835 13944 5476 10132 10551 5450 10151 10150 18779
836 6550 19561 3778 341 3487 15345 4444 6291 5842 2127 2123 303 2571 5841 19562 390 6567 9056 3444 19563 3443 19564 441 3480 6270 1399 345 385 384 5577 9089 416 388 19565 433 19566 9099 9102 1157 1183 4371 5066 14484 9030 15938 4477 3489 1338 3528 19567 378 19568 19569 9118 19570 8889 3493 5314 6431 9077 6316 19571 19572 19573 19574 19575 19576 19577 5445 19578 9862 19579 5681 9865 9856 19580 19581 9399 19582 8238 386 387 1419 5783 18152 7085 1288 6586 6700 19583 4368 19584 327 336 529 192 6558 549 3464 8185 196 6087 4832 4833 4831 318 8761 775 5394 805 810 809 2128 781 2130 292 5636 19585 328 367 5578 19586 6298 19587 7557 4476 3442 3499 3491 19588 3441 128 9093 5575 3113 19589 19590 4367 1205 127 19591 5792 14491 9059 9055 3749 3664 9147 19592 19593 19594 3511 413 1670 15947 3501 6883 14482 3437 4467 1204 2172 6544 4449 1406 19595 3440 4472 4474 19596 2427 5816 375 7077 129 5072 3527 6428 4432 4443 19597 19598 6702 9375 9092 19599 5060 9096 131
837 4993 559 19600 15922 19601 9822 19602 19603 13308 5015 1835 8601 3302 19604 208 6942 19605 16483 19606 4582
838 14642 19607 2190 559 283 11070 2337 3154 2049 17542 1538 4221 4430 1811 2432
839 642 4039 9272 666 16905 19608 5510 17427 2809 2716 1821 1933 8329 2927 2400
840 18272 6099 6345 19609 1253 19610 19611 15500 5613 1540 718 10807 1264 1541 18262 1292 4514 1302 1325 2421 1298 728 17925 543 18263 2555 18972 10684 977 7682 8266 7093 1194 1191 3775 5674 2364 12147 18919 9039 178 9418 18383 978 8873 456 541 837 822 12803 835 5518 16922 5514 19612 7102 1299 19613 6047 19614 9750 1609 3700 2478 6327 7105 3668 1157 8280 7106 19615 2337 5589 17590 14018 1433 1789 2087 8597 550 797 192 369 19616 545 1782 5646 1442 1785 196 2080 1788 1786 307 306 208 810 814 800 8326 3266 4523 19617 2459 180 1323 15935 7090 3702 1236 19618 12154 2605 1242 19619 8305 5136 714 8320 852 19620 19621 18928 2584 6247 8158 6328 7121 19622 1239 3538 3719 4536 2580 14301 19623 19624 3664 7084 4601 7376 1654 19625 1650 8172 19626 4501 19627 5670 1228 2552 184 19628 1407 3631 3751 1174 2418 18969 229
841 2635 19629 16847 19630 14027 19631 19632 19633 17705 14012 7872 17263 19634 19635 19636 816 370 545 13947 16512 196 13948 199 3463 206 1433 293 189 814 812 2058 1428 1421 538 372 3266 2097 3138 192 4841 2472 141 4545 12118 12114 19506 19637 7824 19638 19639 14038 19640 14009 14034 14640 12116 7741 19641 14048 13812 16962 19642 17981 19643 18018 11860 16809
842 12461 2533 2025 19644 4824 16639 3618 11795 6757 4795 19645 19646 10859 3607 1056 19647 19084 158 4735 10860 9970 5607 9678 7021 16291 7012 14642 3611 19648 19649 12467 7036 16405 6530 19650 4861 7987 7474 4916
843 19651 19652 12262 1509 51 9920 19653 19654 1933
844 19112 19655 19656 19657 19658 19104 16736 19659 19660 19661 17579 19116 17580 8862 8869
845 50 19 32 4698 8923 18621 16683 19662 16706 3597 15781 10622 3598 15780 3590 15769 15768 8134 10664 19663 15785 48 16687 16688 4700 8012 15832 13
846 19522 19664 11748 12002 11915 970 934 19665 10432 11769 7897 19666 4153
847 19667 15770 17 16 22 8145 19668 5593 837 141 2525 1509
848 19655 19117 16734 19121 19114 6983 19669 19006 19670 19007 6982 17579 19671 8863 1933 1708 870 13484 3328 1821 1956
849 11841 3192 642 2687 17770 19146 5744 12290 2684 5752 2711 2877 12733 19555 2659 7290 4734 19672
850 19673 19674 16000 3550 11046 19675 19676 19220 3551 18447 11051 3554 5223 11048 5230 4974 10082 5225 3553 11931 19174
851 19677 19678 19679 19680 19681 504 19682 19683 19684 19685 19686
852 3409 19687 12501 17291 17292 15013 1489 8032 19688 13386 5198 2976 19689 1509 13493 19690 3564 9439 1023 1309 8481 17275 19691 1271 1484 19692 14807 1273 8031 19693 15536 19694 15344 12462 2018 5175 18444 6789 6790 6792 6793 6794 8709 6791 19695 1537 17106 1504 5432 1277 5142 575 19696 19697 19698 19699 1551 545 192 4457 797 305 6130 3474 6821 13947 6129 11336 2065 19700 306 307 10272 10265 302 1792 1428 8157 2104 2100 304 370 6125 2101 10237 13580 2116 1780 5997 621 189 4603 11688 6207 3266 2906 6206 4519 19701 19702 8749 799 813 196 10403 2088 2085 369 6139
853 19703 10492 10481 10482 10504 10525 5599 14880 14878 10490 500 501 10476 10508 493 19704 19705 896 12446 17030 9778 4984 5226 5345 19249 4946 5452 17031 19706 19707 17032 19708 19056 17033 17034 3551 5225 17035 19709 5341 5440 5344 12445 16000 13928 17036 11748 3587 2434 2437 18213 12393 10812 19710 7795 2432 4289 6670 19711 19712 502 14877 495 19713 503 10484 910 5358 9770 5359 165 10512 19714 521 19715 239 4271 7305 5438 19716 11639 19717 244 243 19718 245 259 13576 19719 4272 17045 11637 247 246 266 19720 7423 19721 4261 12961 274 7427 8990 263 15746 267 11011 19722 270 269 18878 8981 8984 8985 4294 19723 2847 18115 2687 2773 2692 16769 5747 15874 642 1811
854 1807 10708 5553 11277 10215 5451 10842 10787 5448 18424 19450 10789 5532 10204 10715 5505 11400 13763 19449 11324 11241 11411 19724 10843 19725 18909 10890
855 5558 10721 10728 5505 10559 4321 19726 19727
856 13985 18310 19728 6768 4908 12465 12469 456 541 6088 493 9163 19729 19730 19731 19732 4758 19733 19734 19735 2332 6767 19736 19737 19738 10495 19739 487 11844 4745 19740 15467 19741 8540 10520 512 19742
857 6184 1128 5770 5191 1614 6372 5158 5767 15604 18747 16494 13923 1615 4646 19743 5589 19744 19745 4818 4827 3612 559 14218 14686 19746 6618 14126 14280
858 16340 7649 3012 283 2525 19747 18419 3261
859 4033 646 636 12865 634 633 878 9316 12845 858 12737 861 700 19748 2678 3992 3995 3990 3998 3997 4000 3996 12966 4001 10593 9318 694 19749 19750 19751 15680 15676 2531 10592 706 842 12762 1038 2989 2965 3206 2676 577 4706 884 11441 958 9333 543 19098 3832 701 16628 2056
860 5189 11810 17411 15548 10114 10556 5216 5190 3777 5214 5536 10122 10110 10725 11195 10704 11273 10119 18912 2201 10723 10144 17565 11390 10707 5540 11315 10890 10530 10529 10587 10727 10581 10111 10128 5470 10185 10568 10572 5457 10159 10160 10127 10570 10571 5527 5525 17559 10920 10790 10926 11246 11201 11397 11198 10846 10839 2202 11435 10750 10152 11264 10156 5531 11261 10132 10129 13941 10950 11277 10155 10154 10158 10911 11200 10710 11205 11256 10780 11204 11409 10735 11298 13085 19752 10200 9984 5558 10848 10586 11806 11424 10215 5560 10092 5469 10094 10748 10742 13943 11269 10123 10120 5456 10777 10575 10540 10574 10719 10934 10910 10792 5459 15199 5548 10541 19753 10886 19725 17561 11316 10893 10894 5502 10177 10176 10112 11303 5503 10901 10573 5530 10108 5488 5448 10781 5447 10131 18424 11314 11313 11394 10731 10782 10922 10093 10150 10178 10151 10551 10548 5486 10184 17553 15194 11322 19754 11271 18901 11283 8247 8221 3705 11278 11411 10783 10189 5524 10905 18910 18902 10201 10732 5535 11252 11199 11427 10216 19755 10929 10567 10580 5532 9985 10837 10091 18911 10579 11452 10891 5479 8266 9517 14662 17552 10549 19756 11393 10935 10526 11238 11430 2203 5480 10670 14764 10903 13061 11230 10140
861 13020 8150 739 19757 17638 13002 19758 15785 19759 8013 48 19760 19761 19762 3591 4684 17646 8912 19763
862 9435 19764 6987 1014 11617 14691 19765 13934 3182 2001 12798 822
863 14181 9293 9348 7379 13907 5770 11337 14130 14131 14216 8897 14135 14143 14140 1475 1477 14142 322 14125 14145 14229 14246 4650 12271 450 5191 1614 6372 5158 4579 1613 19766 9894 281 19767 19768 14299 2361 11123 8653 2263 2251 14163 13862 8675 8657 2258 10339 8634 12544 8676 6625 10340 453 8671 3031 4629 774 8640 16494 14272 3761 16493 19743 5589 19769 19744 19745 4818 3231 559 3094 14264 6702 9375 5381 14193 5767 11713 14288 1615 19770 13632 11663 14218 14220 3048 2567 17905 6942 15918 14126 5777 8637 14261 9942 15922 14149 14256 4519 1835 14184 13923 7353 4623 6618 19771 9864 19772 4490 19773 14269 8691 8699 3059 3469 9528 1611 12308 14213 4610 2266 6644 14152 14228 9941 14245 1428 14279 6581 11146 331 5642 2323 14280 8644 9852 2346 481 446 523 14285 19774 14289 12312 5211 14294 14295 8016 8017 330 1552 1797 19775 19776 19777 2598 2596 19778 12558 3073 14197 14196 4627 1321 5577 160 1287 19779 7693 1996 14304 19780 837 19781 2018 19782 19783 19338 19337 19784 829 9307 19785 19786 19787 15468 827 2015 2014 2013 826 19788 5512 16914 825 15344 19789 19790 15051 19791 15050 6057 19792 835 12805 12806 19793 1628 822 2001 1627 12797 2022 12800 12804 12798 2026 12810 12814 12802 12812 19794 12811 12813 12803 12801 832 12820 5507 19795 12799 9306 5508 2005 19796 9236 9216 18630 19797 8367 1998
864 8776 10259 3094 19798 10236 13338 17911 3768
865 5532 10718 10577 10198 9979 5558 9984 10578 10542 10293 9976 10711 10562 10566 10563 10098 9977 11293 9982 10547 10097 10089 10727 10581 11435 9985 10833 10725 10536
866 5110 14641 19799 2767 2765 2769 19800 19801 19802 18583 19803 5742 19804 19805 7294 19806 14380 14745 2685 19142 5751 7615 16040 19502 19807 13868 7155 3127 17818 7172 3125 7304 7142 7164 7182 7183 19808 7173 14369 2705 2758 2759 2752 2859 19809 640 2833 7153 19810 7271 2829 2871 2766 17859 12083 16596 7176 19811 18586 7134 2710 2760 7135 7136 12898 19812 12897 7141 16760 7140 7190 19813 11843 7191 17587 7192 17588 19814 3191 8079 8076 5970 5971 8196 11017 11081 1217 8197 16586 7137 19815 14352 7240 19816 2731 14381 16766 2734 2736 5084 2878 2877 7254 19560 19817 7126 10085 19818 7289 19557 17817 7127 15872 2881 2880 18253 19819 17771 19820 7238 2822 19821 9181 2762 17832 2694 19822 2841 2809 19823 2740 16755 19432 9191 17787 17775 18109 18110 17791 18113 18114 9187 19824 19825 19826 7234 13920 19293 19559 17769 7241 16589 18246 9186 19827 7243 2868 19828 19829 12084 17770 2828 19830 19831 18578 19431 815 796 291 3300 3138 15896 9350 2895 2119 2122 2136 1424 5883 6650 1443 1425 2121 2129 781 2123 19832 556 2127 2125 2126 2115 292 2130 2134 2135 2133 2118 763 2128 2116 2131 2132 2138 8597 303 810 13580 5703 4628 2362 18374 208 1586 15373 6395 9743 2099 1585 793 13156 11707 6445 2888 3422 5389 9962 15988 6810 16508 11114 757 2305 19833 5646 8742 2890 1782 1433 277 293 2894 8746 4653 3463 189 762 302 6130 5650 6129 6833 545 1434 9740 553 779 790 2065 1442 3474 10237 2093 2124 1420 2063 2067 1780 2098 2064 4608 370 2113 4523 2096 369 10342 4651 8761 814 15426 4654 3043 772 770 769 768 19834 771 1444 6596 4629 774 3471 3227 1797 1620 316 1592 4353 14234 19835 9371 3465 10273 4463 9369 9370 795 192 3467 787 7519 13754 19836 3266 3267 800 3475 1792 2482 16521 3226 761 1582 2097 4521 297 206 207 1209 4522 812 3137 19837 11344 1426 1789 1787 10402 196 1790 1577 294 374 290 2088 767 19838 301 298 794 195 8736 1319 176 559 19839 19840 16250 642 2779 2842 18250 17448 7125 2687 19841 19842 2689 19843 2832 19844 18248 19845 19846 7239 18581 19847 7257 19848 7235 19849 7149 7181 19850 2686 5753 6835 17861 17777 5754 7297 19851 2879 7144 19852 7273 19853 7156 2802 2811 19854 7236 19855 2695 4228 2773 7184 2749 18111 2863 2831 7228 9188 19856 14354 18339 7276 2856 19857 16595 2720 7285 9185 14386 17826 19858 5100 2858 4557 19859 14445 18493 3504 19860
867 1500 1514 1519 16026 17226 5025 4344 714 2276 3349 13406 2047 2049 19861 978 19862 4244 4321 4294 980 4409 2337 1538 11910 19863 5685 8479
868 283 18410 1002 972 19864 12010 18452 5030 19865 19078 19866 19867 16410 14772 2381 19868 13403 633 155 3352
869 902 10512 907 488 19869 19870 19871 510 19872 19873 19874 19875 4380 19876 170 513 12603 19877 507 12605 511 512 19878 509 19879 19880 19881 1173 19882 14864 19883 19884 19885 19886 19887 18501 19888 19889 19890 19891 19892 19893 19894 493 161 10490 10476 501 10485 10477 14880 5359 12602 494 496 10525 10478 10487 14876 12600 10504 10491 10493 10479 162 10475 495 19895 19896 19897 19898 19899 12606 9527 19900 19901 19902 19903 13346 10319 19904 15517 19905 19906 19907 19908 19909 19910 19911 13341 19912 19913 14870 19914 15180 19915 19916 13351 19917 19918 13352 8219 19919 17816 19920 19921 19686 19922 19923 19924 4239 19925 19926 19927 19928 19929 19930 19931 19932 19933 19934 18329 1169 19935 19936 19937 15227 17335 3819 12628 17075 19938 1502 17077 1277 12498 1503 19939 1278 3413 1500 1282 19940 8390 19941 14831 1529 17301 1681 19942 14913 8557 17173 8554 8555 8558 1280 12637 13473 19943 8424 251 19944 8510 8830 11026 17135 1537 19945 19946 19947 19948 19949 19950 13345 13347 19951 18513 19952 19953 4238 19954 19698 18534 19955 19956 19957 19958 15518 18617 18616 19959 19960 19961 19962 16453 19963 19964 19965 484 487 19966 485 19967 165 19968 978 19969 11954 11948 11064 13373 7665 6423 19970 19971 19972 19973 19974 14875 19975 5598 19976 19977 10486 500 19978 19979 10488
870 6184 1441 3762 3795 6348 4846 4847 5571 14592 5563 5570 6281 10808 5620 5669 3669 5625 4373 8285 19980 1336 1113 2548 3542 3623 3541 3620 3619 3672 5153 8824 19981 6314 3436 1203 8821 1204 8820 19982 6545 6546 6323 6547 8817 3447 127 8825 9118 6286 6299 19983 3440 3477 6319 6551 6276 6554 4366 4476 19984 19985 19986 19987 19988 19989 13594 8577 7983 12131 482 346 387 416 2296 426 6296 6293 1292 1398 19990 19991 3622 3670 15392 5622 2541 2627 6200 19992 15383 3667 5623 19993 19994 19995 6320 5152 10696 19996 5791 337 6347 18264 19997 15367 16476 6256 6262 19998 6336 19999 1109 1227 3703 1303 11177 1625 5657 2586 1325 20000 4450 18836 1182 1302 1119 20001 6337 4613 8826 332 4394 6270 20002 5314 6528 4467 19568 385 386 421 5844 347 9685 6335 3453 8813 3442 11027 20003 5843 3503 9099 1395 11128 2578 20004 3710 20005 20006 8248 9121 6341 14483 415 5841 6300 18279 20007 9158 9033 6342 3432 3499 7557 3451 8812 9059 3509 9015 1391 128 9100 6357 20008 20009 423 12666 6290 4592 6332 20010 20011 20012 15883 4494 20013 4598 5565 17772 14180 8020 20014 20015 20016 3433 6317 8342 4472 4474 20017 4591 1642 1193 5626 6328 1125 4502 20018 4512 2522 2223 2363 1352 1218 1636 378 1399 20019 20020 20021 9102 9115 9104 8952 8204 6353 6199 3678 2555
871 6588 2289 208 20022 440 20023 203 2324 2483 10801 20024 410 3059 553 13671 8772 8727 1795 2895 6647 3078 3100 3737 12287 14175 12172 20025 7974 9615 4844 5771 20026 14516 20027 448 1555 623 20028 3731 17903 7393 1601 20029 5775 8601 3022 6814 20030 283 1317 20031 557 20032 14814 11378 16997 12150 4575 17909 13324 20033 4998 8296 1467 2252 523 17057 13604 802 6607 2270 5397 187 13322 16996 6204 11134 14813 3019 3420 810 4611 552 189 1792 13948 192 775 293 12377 12516 201 369 2906 20034 20035 7354 7368 17908 2295 20036 546 4565 176 1591 540 3006 1236 6360 8625 3070 7353 2464 4646 11711 20037 20038 3089 3024 6609 10394 8734 13834 2306 529 2465 2472 2305 1209 2247 12169 2361 2347 15191 2146 11144 206 10340 6928 3023 20039 3304 20040 837 1617 205 10694 51 1553 1619 2266 16557 12586 4344 18010 20041 8235 20042 9330 18345 18009
872 3973 1988 929 1077 1979 12559 1840 11757
873 19726 20043 4252 4322 5339 20044 12951 7325 4328 14464 14460 5546 5545 12585 20045 4327 4329 16442 15615 20046 20047 2212 15571 15570 15573 15569 2217 15568 15567 20048 18031 18032
874 1907 11523 14598 2934 3891 4784 4031 4032 4145 11985 4339 1708 3872 973 2337 20049 296 5409 9456 9889 14472 155 1029 1977 1889 4072 8309 20050 2918 7745 3867 15251 729 679 20051 874 3831 20052 3901 3311 20053 1818 594 3920 8261 591 20054 20055 11982 629 20056 7947 15497 16612 3846 2969 4085 11515 4117 3955 2052 4430 4441 15026 9290 1619 545 5381 192 369 2103 1616 12259 2358 1794 2100 18916 11343 19837 2295 814 13312 16490 559 4135 13456 20057 586 632 2386 8142 16575 16344 9924 696 3890 2525 7001 20058 1996 1890
875 18731 20059 20060 10226 6704 20061 20062 20063 20064 20065 1594 13662 20066 20067 20068 20069 20070 2660 1428 15555 20071 15902 20072 19774 20073 13665 1207 20074 6037 20075 4637 3276 6375 553 20076 911 13596 20077 14332 20078 12612 13757 20079 17066 20080 9512 2673 20081
876 20082 11677 11678 11683 11685 11684 1933 937 1939 1712 17478 20083
877 3297 20084 953 925 4053 1853 4252 20085 12419 302 1445 208 6821 370 305 199 2134 805 4244 7776 18597 20086 242 20087 17114 20088 247 5339 10794 20089 17883 18027 20090 11631 7438 20091 20092 17882 20093 12430 20094 20095 1023 4251 16542 4305 19460 20096 20097 20098 20099 4247 7309
878 13800 306 1422 296 12298 19602 6204 15384 3022 20100 20101 805 208 2136 5616 19386 20102 5377 7364 9396 3793 5015 12320 6030 5423 12265 18438 18746 370 4622 11172 8619 20103 16996 402 1572 15250 18641 9174 3133 405 19374 20104 20105 1473 15893 3071 2242 5378 20106 3101 12160 16392
879 6922 4735 18476 7809 20107 15300 5604 7450 12415 12976 5586 20108
880 8225 11652 3022 7353 14683 281 3048 5454 4636 5218 14685 20109 9629 10386 2510 2265 2473 10236 18328 10682 18640 6630 9626 2895 13669 6930 13684 197 1775 3304 6149 6801 6799 6800 6798 6143 6031 6139 540 6816 559 7202 7201 20110
881 15728 13772 7042 20111 20112 17525 7064 7063 9462 20113 20114 16404 9668 9669 9667 9952 9664 3406 9951 5116 20115 9678 4429 7033 7049 3399 9956 5111 7037 10590 7070 5113 9960 9957 7050 7030 20116 9677 5112 15727 9670 7051 9673 9679 20117
882 3352 566 1973 3956 4039 4042 729 4144 1813
883 16336 20118 19306 20119 15360 20120 13110 14795 19509 13111 20121 20122
884 18054 8133 13744 18619 20123 16681 18621 16678
885 10940 11435 11220 11427 18826 5458 9975 10837
886 621 1586 17708 5663 7766 17709 2908 12413 12414 2359 3302 3052 1831 553 302 2310 793 3420 1441 1589 2474 12170 12153 9822 1569 3092 2242 6607 5617 2465 300 16516 6389 10382 374 4657 4458 205 2895 4656 1620 559 6813 2662 3794 2566 198 1578 2123 2127 192 11704 1553 7371 7368 305 5378 1552 1582 2077 3136 1583 6810 12133 11707 10381 8290 1581 10380 3135 12171 10233 2484 5619 4522 2485 16514 5882 13211 6832 397 5887 13212 3106 6576 398 8740 764 10353 1320 767 1427 20124 1435 4649 15372 20125 807 8156 3765 1791 296 306 3133 9653 3059 2343
887 13165 948 984 14442 8322 13193 4052 12341 926 8339 20126 1034 20127 3192 3382 1732 20128 2375 10452 3196 15097 20129 3317 14453 2993 8252 3397 2986 1097 9989 3367 2787 15072 12688 2637 9457 7486 973 707 1728 6485 16561 12225 1933 11770 20130 10052 1087 7464 6738 10607 12343 2972 837 7209 821 12001 16884 1023 12591 15105 15732 11606 2790 3368 13217 929 12697 3897 2963 20131 681 17997 3318 9458 20132 2341 4091 2799 3347 17498 2525 19494 17168 15328 11846 12468 20133 20134 20135 20136 12532 11880 718 11891 4975 20137 20138 4974 20139 5065 4956 18463 5342
888 20140 2971 1433 369 203 3082 1437 192 1442 20141 1811 2662
889 4738 3618 4729 3611 4732 5050 2940 20142 17947 19642 20143 4891 20144 20145 6752 20146 16564 20147 4542 17396 20148 3617 16664 5017 4818 20149 4824 4873 16377 7815 20150 19735 20151 20152 10954 6767 7881 3616 4764 3607 4820 6760 12108 16878
890 20153 20154 98 7590 5966 7589 4673 4674 563 10983 13716 20155 20156 642
891 13398 10039 11462 3848 4082 1032 11481 3875 6520 3851 2405 1938 6477 2415 1726 958 707 473 893 2382 590 2491 2404 4080 2944 3849 4138 3386 1708 17944 20157 7758 1907 693 559 2482 369 176 192 8187 2098 779 778 20158 20159 20160 12798 1278 5523 9217 20161 20162 8968 9215 8966 20163
892 16839 9810 9787 20164 718 11077 7575 17762 7920 3144 20165 3162 3150 20166 7730 20167 9748 7728 9797 7767 7592 7652 7572 20168 17918 3183
893 20169 20170 20171 4421 20172 6721 20173 20174 356 352 9870 20175 20176 20068 20177 20178 20179 20180 20181 978 4207 20182 20183 13665 20080 20184
894 1811 19071 20185 5740 17784 4562 642 1165 19727 160 20186 20187 20188 20189 3607 158 20190 3617
895 19633 20191 17699 20192 20193 5595 14978 2337 20194 20195 2432 20196 7740 14987 20197 20198
896 3189 14463 20199 1609 2976 14417 1020 1017 5273 5275 18508 5278 20200 2656 3581 280 10006 5279 20201 20202 1023 1537 1511 1509 3802 5430 5372 20203 6081 1500 20204 13102 13104 6526 9418 978 7452 714 4214 2287 10597 20205 18045 20206 4202 13574 13445 15869 7936 8542 13760 20207 15138 20208 5172 3419 20209 20210 15281 2525 19439
897 7680 16180 7713 12092 9805 12241 9795 17795 17967 9755 10460 19163 7728 7712 7831 10856 4736 4871 4729 6757 4820 4738 8537 9797 7720 7697 10464 11836 7659 18594 9757 9758 825 9445 16077 1970 17267 2797 701 3397 1983 1818 15643 19290 14599 3916 11511 16350 15220 2391 15069 8236 15760 154 461 20211 888 3941 574 650 4116 12200 11545 2395 4204 20212 728 4138 573 12212 4411 652 12560 2380 4344 3263 17997 8253 13406 1708 991 1817 2383 6677 13484 1714 1875 12534 2355 20213 3363 3882 1066 12248 4084 1829 14787 3875 2922 3316 15296 20214 155 669 8302 1742 7487 1854 12988 12839 11609 12937 6492 3992 4001 1741 4159 696 585 1965 743 2390 15251 4035 699 2527 942 17491 2636 1723 15765 14659 20215 733 20216 20217 1740 14722 651 1969 16614 8318 16645 20218 8337 1824 9754 16076 7715 7668 7660 1811 15030 3951 887 12875 8015 9889 20219 660 2396 4778 16572 1730 2276 4046 580 870 4081 2387 15459 3993 20220 1739 9446 6694 14467 3200 1822 14763 7452 471 7758 1821 874 6491 2970 473 675 4186 969 15029 11099 14514 841 20221 15510 6850 10607 689 1933 18603 10042 3119 13425 5127 20222 11477 1107 2283 7962 1762 2043 3878 14351 20223 20224 18581 3504 2740 2824 9182 5080 20225 642 1029 1771 4047 16358 6522 2405 992 630 2923 666 609 10608 2967 11097 13206 7954 3607 20149 6775 4726 20226 3224 3154 4003 1717 2406 2961 1096 6841 4034 1892 16571 11463 2657 11482 8317 11530 934 1930 4082 1842 2281 11476 2929 842 965 2637 20227
898 20228 12694 15254 470 967 673 17961 15244 4719 20229 20230 12070 20231 20232 15000 10450 11860 4702 20233 16949 16957 19642 16958 16965 20234 4891 12103 20235 12075 20236 19302 20237 6921 20238 20239 20240 7859 4888 20241 11840
899 5214 20242 9986 11206 5532 8360 15547 5487 11390 11293 10559 10843 10202 10106 1330 5534 11301 5541 10547 20243 11002
900 20244 632 3833 2529 9729 2676 1915 10023
901 6584 13915 3109 4519 12453 1020 1017 5271 5277 5272 5273 5274 5275 5276 5278 2656 3569 3572 3581 12523 3577 5280 5279 280 20245 13273 9999 20246 1023 20247 20248 6381 6930 18760 4598 9609 2510 718 20249 11704 15411 20250 2203 1352 559
902 9904 3264 2961 554 302 18157 1779 6824 808 1781 2068 301
903 306 9781 323 325 4992 305 304 6125 8207 20251 4504 20252 3634 4509 2183 2589 4502 2184 3522 8591 2301 5001 5000 480 6619 2310 478 2466 1145 6201 18964 6340 12422 6258 2515 15379 9497 1212 3627 6271 377 5846 327 415 414 434 5790 10810 5789 391 384 344 345 387 386 388 5839 2260 378 9079 6306 341 6305 342 9077 6543 347 1399 1400 1345 1346 338 339 418 1401 416 420 427 426 428 5843 432 431 430 5844 429 423 422 419 5841 5840 333 5845 365 340 346 337 482 2296 394 395 393 392 413 421 4499 14488 5786 3540 1363 7543 16475 20253 16466 20254 19997 1396 1397 1395 1398 2522 3542 2548 1113 3622 19995 19994 6353 5653 8233 6881 1230 3707 8948 8258 1183 1336 5630 20255 15543 3620 2546 20256 3541 4373 1256 3112 10808 128 20014 4452 5316 9101 6293 13788 12318 14150 14199 14146 7518 11699 14141 7379 11702 3032 9946 14136 14288 10345 15414 14147 4650 11142 14140 14209 14148 9348 14126 8895 20257 20258 5767 14207 9941 14245 9942 3762 3785 16494 14215 6372 14131 14130 14135 11337 14143 14149 14144 331 2526 14142 14183 322 20259 14181 9293 10471 14138 14170 8897 15384 14184 14152 14153 20260 1611 9936 14137 5384 9292 14205 7363 14204 14128 13907 14229 14246 1614 20261 4627 12538 14224 5393 477 6604 312 313 6603 1615 6602 6606 1591 187 2142 2154 186 802 2155 12317 5379 371 406 205 374 2359 372 11136 176 15230 373 3770 16515 15904 4458 294 6824 293 7347 194 295 13212 16533 2484 10338 396 397 9383 8584 277 4522 4525 291 2092 2096 2894 10342 3138 810 809 1706 1587 2127 3043 2305 757 9962 6445 2895 1586 5703 208 11114 793 189 1585 3136 10337 6812 8288 1584 8289 8291 10235 621 321 320 20262 4835 1562 9929 15422 14520 1561 9608 10238 17897 3795 3480 6348 6270 4394 6303 4372 1365 1364 1366 1368 1367 1372 1371 1373 1370 1378 1381 1382 1380 4393 1379 1375 1374 1376 1377 1418 1390 1389 1388 1387 1384 1385 1383 1369 1386 3450 4477 15938 11014 9685 20263 6281 1347 6286 4618 20264 1124 20265 1331 11236 17564 10292 9984 5558 10543 9977 10098 11272 20266 10836 17554 10837 17550 10838 11238 10526 17562 10533 10584 10832 10570 10787 10540 10751 10575 10719 18236 10108 10537 10721 10142 10147 10167 18912 10723 5536 10755 10724 10559 10215 10725 10833 15192 9985 10581 10834 11220 10554 9980 10789 10835 10942 10212 10210 10209 10211 10732 10730 9804 12240 17500 17675 9745 10468 12234 7790 17938 10463 20267 20268 9756 5560 10110 10094 10111 5470 5505 12662 12663 8208 12665 18195 1116 1623 11307 1191 6231 5627 20269 9042 1674 9041 2632 8876 2564 8993 2539 16456 2453 2496 1236 7682 7655 20270 9510 8537 20146 6752 20145 16565 16570 20271 6460 20272 6464 6466 6465 6468 6467 6463 6461 6462 3919 18004 673 19666 17913 17933 970 674 16648 675 676 677 678 679 680 681 682 683 684
904 1645 6899 1638 2558 2193 6876 20273 1668 20274 16798 5347 15959 16795 18914 1200 1201 3638 20275 18639 20276 20277 13627 189 20278 2510 208 793 6445 9962 2895 5703 1585 757 2305 1422 320 321 1706 316 10230 805 529 1591 528
905 18803 6453 20279 20280 11058 980 7332 7334 16898 20281 978 20282 11951 20283 20284 14508 20285 20286 3261 11125 3199 3869 463 464 11472 4155 20287 12936 11511 1755 3850 3915 16579 579 1067 691 5221 1853 1850 1848 1852 1851 1857 1847 1845 1846 151 1849 1855 2638 3928 3129 1879 4782 693 8129 8268 8269 15739 564 9923 13572 14717 1092 20288 18525 2667 13201 2680 19137 13217 8267 13209 14732 8253 4055 14026 3349 1937 713 714 11475 16609 2396 7744 473 12698 733 20289 18484 20290 3947 991 1713 15637 3203 4344 14925 11559 711 8323 20291 712 3201 3200 461 15216 468 8252 465 1718 1716 11495 1938 2286 11537 11124 7946 11482 20292 13484 19619 4222 19138 20293 20294 9301 917 14723 20295 3927 20296 10413 674 673 969 20297 5126 18004 877 20298 142 14004 682 1843 1844 16645 686 20220 4028 1906 1077 928 1076 15761 1910 586 1921 744 1933 1930 916 593 6850 19550 12696 15464 650 19139 5135 155 1004 6404 20030 9904 1009 7408 283 1317 3271 20299 20300 20301 20302 20303 20304 20305 20306 14506 20307 20308 20309 20310 7401 5164 20311 7403 5162 6452 18384 14071 14062 14507 20312 11730 1811 20313 2525 1538 12727 20314 18797 20315 20316 18804 14509 20317 18805 20318 20319 20320 20321 20322 14505 1500 8388
906 1553 1477 1475 801 10348 11161 20323 20324 20325 13326 20326 7365 5004 6597 529 3039 5767 10230 546 774 773 4576 17011 20327 20328 20329 1811 199 6588 2299 1615 187 3096 203 2295 325
907 3901 2964 4076 1771 2273 874 870 597 20205 17878 9429 9456 20330 2967 3849 747 1910 1876 16660 2937 4063 737 11765 20331 17737 13402 13954 11550 4017 18695 20332
908 20333 20334 16424 16434 20335 20336 20337 20338 20339 8861 16732 12340 16019 20340 20341 20342 20343 20344 20345 16435 14812 20346 20347 20348 20349 20350 16421 16431 14811 20351 20352 20353 20354 20355 20356 20357 20358 16423 16436 16427 16429 12957 20359 20360
909 650 6922 14452 20361 20362 13112 20363 16847 5135 3915 6939 3755 887 18337
910 12595 19316 20364 4543 20196 20365 4544 1800 4747 4764 4820 4545
911 3116 600 3123 1772 3373 3347 4122 870 601 3216 13167 20366 20367 20368 19223 18979 19053 15165 8543 991 4131 2415 11917 654 3983 2680 1925 13806 20369 19049 2974 2276 20370 12591 7937 2954 2937
912 11673 15776 10628 8914 10652 10656 15767 15795 15796 12339 4682 20371 20372 20373 31 3591 8931 20374 10625 8133 13745 13744 20375 8132 4681 10624 10626 11674 11668 8130
913 17077 1279 17175 19478 250 249 18715 247
914 20376 16937 3241 6498 20377 18895 7752 2337 722 19941 8511 4994 1492 8393 13477 8401 250 13690 20378 17204 1276 3810 1490 1491 8402 15629 1493 1462 8398 13386 8494 17203 14329 8480 12645 12198 14318 3325 13049 20379 1483 17370 5430 1546
915 11946 11944 1708 20380 11871 8142 614 2957 14614 4131 3898
916 20381 20382 11665 13622 14295 20383 20384 13629 9843 1623 3638 20385 20386 20387 14684 5464
917 13157 20388 4458 176 20389 20390 5636 20391 12273 8773 11373 8805
918 15877 7249 17777 2694 18203 642 16586 20392 2880 12733 7145 2877 7288 15872 17934 19817 978 1165 3596 13806 20393 20394 14341 2881 7179 16256 18257 4430 20395 7232 639 20396 6835
919 4531 14891 2443 5854 20397 20398 5915 14080
920 20399 10149 20400 10208 20401 5469 10551 10140 10950 13766 19724 12222 11245 15544 11453 19453 11388 5488 16455 10154 10123 10120 5502 11414 10128 5553 18863 11290 10106 10171 11277 20402 10147 10132 5478 11417 5457 5456 10122 5551 5458 5547 5501
921 2972 1986 12775 6664 18486 16410 2676 18417 12784 9330 3317 20403 12755 3294 12218 3295 8243 16021 705 4231 2525 19458 12889 12783 919 2392 10012 20404 8235 6470 16241 4091 9273 17879 8257 3196 20405 20406 15211 460 6520 4724 4786 4828 4827 3607 6759 15077 20407 4406 1811 7577 7671 15048 16200 11835 7730 20408 20409 3192 16933 2635 634 9316 18051 17420 3204 3370 15081 12831 20410 861 11869 13845 20411 16263 14731 713 15682 7933 14792 12835 924 6038 575 20412 12744 1031 948 9296 12853 12790
922 4593 51 4295 20413 4337 10814 20414 20415 17705
923 11922 19175 9831 19178 18448 19179 19203 19675 11043 18447 20416 19172 12000 3292 19256 19180 16306 19169 19204 19184 20417 6117 11038 19188 19189 20418 20419 5225 20420 3551 3552 20421 19056 11998 5344 20422 5223 8348 20423 19674 15999 19192 10054 19195 4975 4974 17030 11037 19218 9832 5246 4961 20424 11999 19198 19199 19200 10063 8346 4960 19225 18074 20425 19252 19253 20426 4928 5244 5240 19206 3011 720 15283 19216 4400 20427 2493 20428 18411 955 10614 598 2911 2375 16241 542 543 728 857 736 9723 3532 9739 1040 2914 985 9737 1074 912 11609 10027 1825 11552 1897 4062 624 4006 18035 2525 2048 3010 15523 20429 717 11891 19254 9778 5226 20430 17031 20431 18105 19207 20432 20433 19219 5342 5227 7914 19208 7917 19213 8539 5601 7843 20434 19209 20435 16565 16570 17530 16073 5562 5466 7681 20436 20437 20438 5490 11078 20439 19210 19211 17534 4416 16194 7743 7794 19212 20440 20441 6037 20442 20443 719 20444 10065 20445 6122 19018 5251 5256 10073 3554 5224 20446 19220 13073 20447 11040 19223 17334 19224 12447 19249 12399 20448 19229 19266 19232 20449 19187 19222 6998 6999 20450 4664 18852 17164 11076 20451 1217 3191 10830 2971 20452 19174 6364 18071 19262 5250 4964 13589 19236 20453 19258 19016 19260 19221 12017 3549 5230 19246 19183 20454 20455 18458 20456 5345 19235 4952 20457 19186 4900 18453 4930 19263 11931 19265 20458 12449 11881 11880 1082 19412 12873 9715 19272 4146 924 19273 19274 11592 19275 7824 12441 12443 19279 19278 8382 1039 951 2635 2972 12532 6487 7916 16307 20459 19283 6120 6028 19281 20460 18400 20461 20462 19226 19285 1277 8458 20463 1680 12627 1500 17201 19286 18241 5685 1496 3800 17585 1502 12498 1503 255 1506 3803 17352 1509 1508 13505 7120 19556 1511 8555 12637 20464 20465 20466 20467 6081 17202 12636 12624 256 257 258 1513 1526 8386 11837 17084 1528 18118 20468 17297 8027 17374 17155 14316 17146 1283 1537 20469 5237 5030 18463 4935 4938 20470 13068 4956 18451 14589 20471 20472 19182 7610
924 6187 6189 20473 6188 16185 20474 7725 20141 20475 6190 10460 20476 4533 3292 160 11857 15316 12233 8454 13386 1500 1509 6193 20477 14796 20478 20479 20480 20481 2330 5584 4818 12120 5017 6757 4738 4826 16874 4729 20482 3617 4723 6756 12123 4820 12927 17703 20483 14791 12926 2636 20484 12253 7697 20485 7707 12162 2364 3194 673 675 1843 2525 4289 13221 722
925 10902 11446 129 10905 11452 10579 10704 18911 10554 10848 10119 5541 11405 10891 11451 5547 5538 10742 10116 19705 1169 5470 11435 10761 9985 10106 17746 17014 10097 10947 10215 5528 10918 11401 10583 10089 10897 11398 5447 5560 10103 3547 17499 13609 3549 4952 718 10556 2203 283 20486 12438
926 20487 9769 10502 9768 575 20488 12438 20489 20490 20491 20492 15974 3806 10524 494 161 10508 10489 3589 20493 20494 20495 20496 20497 19950
927 20498 20499 18792 18793 5172 17201 20500 17393 2647 17391 17175 3171 51 1609 4207 2525 12210 542 975 7666 18368 20501 19397 15601 20502 18809 3154 4409 13649 20503 283 2337 19395 20504 20505 20506 3270 642 2773 2659 19502 5086 2780 2692
928 5135 13208 3912 2337 5584 20507 3963 7619 3189 15618 1538 3875 15218 470 593 13374 4006 2273 13483 4171 145 5372 4141 1995 642 16079 20508 1818 1897 4005 3365 888 679 15007
929 15642 11762 10047 4019 1989 3235 3307 3396 1865 15636 3229 4003 2637 693 875 8317 4036 4034 1078 3839 20509 846 1947 1772 2046 1966 1945
930 1618 1612 13923 20510 2265 9348 20511 20512 17756 14335 12557 2124 546 14140 12308 16101 14150 3105 20513 20514 6375 15422 14271 5400 20515 14203 13665 2660 10327 17066 1441 14129 331 13797 11162 20516 13592 4598 14336 5569 20517 6705 13659 1207 14210 11697 3047 20518 9938 14183 20519 9350 793 1476 9948 6621 3742 14229 3051 4353 14151 14288 4640 17055 765 8781 7518 13333 14289 6656 20520 20521 837 2019 5512 20522 827 829 20523 18050 1627 12799 822 1628 8968 9224 5507 20524 5514 20525 20526 5515 7846 762 1555 8584 310 14858 2474 1430 13139 20527 1323 6098 216 5612 179 5671 4622 2128 809 14188 322 14142 20528 2308 14275 2132 6930 14143 14193 14133 11142 2067 1835 5639 763 14146 11164 7397 20529 10236 524 20530 4610 14136 3033 4647 5300
931 584 6664 8253 3941 2367 15742 3587 559 545 176 6131 302 12376 619 290 805 1779
932 17573 20531 20532 20533 19006 20534 20535 20536 20537 7545 20538 20539 20540 20541 16711 20542 20543 20544 7546 20545 8847
933 20546 11737 20547 5951 20548 20549 20550 20551 5860 14922 14887 18499 20552 20553
934 1538 20209 716 2702 18493 19502 16040 7238 642 14529 718 9997 5287 1023
935 451 450 3784 767 3092 2464 1795 1831 3052 9608 1559 1560 315 314 1561 20554 7365 277 1574 1572 4498 3033 3094 1584 18748 3019 1615 298 1319 6587 7398 5008 408 1430 5003 801 8580 6571 12549 1568 7378 1583 1578 8290 10238 7353 14520 17016 8605 6605 6606 2156 1591 10352 2567 1562 6602 203 1475 9642 1477 1554 764 1571 1576 10381 8293 7348 16101 20037 20555 20556 5777 10280 2267 296 9655 20557 12269 14233 9363 20558 17047 3077 1567 1613 20559 319 3739 2142 2076 5421 9631 10799 9355 20560 14252 7384 18759 10406 2485 621 13161 10337 10356 5891 2157 10407 16498 18407 13820 2971 5344 5343 5440 5342 18457 1566 14139 20561 16501 15425 20562 1209 12129 4578 13157 5639 1422 1582 1581 3072 15424 4519 6631 1617 9929 2089 761 837 20563 20564 835 16911 15753 15744 13823 10235 9962 195 545 17062 293 205 305 6127 410 290 369 2358 2083 1789 1788 2097 1426 3474 550 7194 4625 1782 1442 2058 189 2362 207 209 9368 1424 2084 4518 3023 529 4466 208 187 792 2140 186 3475 192 2096 194 17053 553 8785 8189 1565 6832 1586 3076 10349 14339 2247 3134 1577 11126 2067 6936 3090 20519 5615 309 11134 15422 1564 12514 9364 5402 13139 2310 1569 622 20565 478
936 6306 419 1401 423 1399 425 6305 9079 3499 1157 9129 338 6309 16470 2542 18242 20566 6339 14488 378 6263 20567 6307 341
937 3209 6070 722 1266 8838 1533 12522 20568
938 16068 17195 20569 9997 6526 192 5887 4608
939 20570 20571 20572 20573 6406 20574 20575 2334 20576 2337 10689 20577 20578 20579 20580 20581 20582 20583 17798 20584
940 15313 1971 12562 718 4924 12439 20585 5365 20586 13341 283 7134 19317 6539 14663 17321 19318 16597 2853 456 20587 20588 7713 9755 1811 20589 3208 1165 20590 1168 3596 20591 6861 11186 11188 20592 20593 16445 2437 20594 1421 2484 370 3422 775 814 5144 2127 187 792 14175 12129 2305 307 189 1706 809 805 4369 3719 20595 3541 5712 13079 20596 20597 10897 11818 15336 16841 5515 7340 20598 8969 13701 8968 9215 20599 14394 20600 2041 20601 13431 4903 4735 20602 893 635 924 6686 10612 18897 13180 821 13808 628 3902 2404 20603 1881 1962 12332 8317 2963 2033 2954 9430 20604 2919 20605 3958 13197 14599 16935 2662 9764 17810 20606 19141 4539 17042 3956 20607 3261 19034 19548 6790 6793 6791
941 16360 3971 624 3907 3908 7261 1922 1988 2278 561
942 2927 998 2324 208 2337 3322 4043 10597 1941 744 15081 9456 5004 16520 525 197 189 2121 553 8291 621 11604 6482 19866 15076 18528 461 469 3310 20608 16103 923 17423 12225 920 8128 20609 16113 10596 2992 2792 14730 16025 992 2947 917 10031 20610 4143 2799 11571 2676 12575 3203 14792 4231 4162 630 4089 8257 7459 18046 156 17649 15308 1577 1582 1831 1795 2319 3107 9362 3134 559 540 13486 821 672 15089 2923 3367 6474 20611 1032 12212 14444 2679 8274 2396 980 9715 19458 460 1061 2682 2283 20612 977 3212 14446 14737 8402 3584 13664 2493 3121 20613 18818 20614 13034 932 1086 12885 5173 20615 12260 18489 668 3386 2786 8235 9330 8322 1051 1918 20616 15449 17644 12352 3533 20617 20618 159 9471 978
943 5085 5102 20619 2851 642 16760 2848 17587 7141 7192 11843 17588 2883 1539 1538 5739 2704 5741
944 6664 20620 20621 20622 20623 20624 17798 3727 20625 20626 20627 20628 20629 20630 20631 20632 20633 18505 5273 20634 13599 20635 13283 2220 51 141 917 4053 2525 3581 18043 1500 5172
945 2814 20636 5087 5109 5739 2702 5091 5080
946 20637 9225 20638 9228 20639 2018 9227 9209 9212 8963 20640 20641 20642 18050 20643 7204 20644 15163 20645 20646 12215 2019 2020 8371 8370 5514 20647 18282 12175 20648 19612 8369 8962 20649 20650 20651 20652 828 8964 9211 9217 9310 8366 6055 9207 20653 20654 5520 20160 20655 20656 20657 20658 20659 20660 20661 14973 20662 20663 20664 9218 20665 11078 1811 20666 12809 13173 20667 20668 20669 1627 9230 9231 20670 12811 12798 9308 12815 12810 2024 17040 20671
947 696 880 3953 4140 893 15097 20672 3130 1933 3387 20673 468 16025 3914 6478 2380 4016 3960 20674 4139 20675 11507 3390 1842 703 991 4710 5135 1899 4065 1896 591
948 5475 10802 11400 10125 11390 15544 5456 10163 12452 15545 11433 11800 10902 10106 18826 20676 11826 4664 10534 15553 10123 5538 11804 10557
949 19113 19117 20677 17498 9914 3409 8429 16711 20539 20678 20679
950 20680 20681 20682 20683 20684 20685 559 545 2893 619 1443 3465 2890 1424 5646 1208 15228 192 20686 20687 20688 20689 20690 20691 20692
951 978 2437 2432 10694 91 3191 20693 4676 456 2203 11811 1807 160 9793 4678 4679 8266 3270 2971 8095 20694
952 16496 20695 6087 13790 319 1579 4835 10469 4837 1558 1593 16501 323 4993 5394 10238 528 3472 8156 5772 3794 1797 6128 2071 2070 807 6628 16526 6811 307 4832 4833 4462 17891 7349 15250 8677 9291 10318 13144 13141 14338 5639 2551 8581 6385 14239 1438 20696 5401 2061 14215 6375 7200 1613 3736 9365 20697 20698 11359 20699 4526 6202 9781 325 4992 810 2461 791 303 6126 2135 2123 1706 9962 1586 5703 189 793 1585 1583 1582 1581 8295 767 1556 1555 1554 2472 1791 11134 557 7368 3082 2239 7381 1476 4844 2270 1474 11116 3765 1421 8301 1464 1472 1622 8155 10255 3055 13912 20037 8294 2567 12324 14241 12325 5393 3095 8662 8672 802 5379 371 3040 5012 8612 805 324 8061 10327 6979 4575 8771 11373 8774 6600 17008 12283 8047 8670 450 12308 12310 2067 11354 12266 7361 16485 13819 20700 8600 6947 8641 9359 8622 6370 13671 20701 20278 12545 6381 6371 6380 20702 9630 6640 534 20703 10262 316 2060 2062 20704 20705
953 671 10056 15736 6664 1798 3953 14008 13112 20706 2337 141 5512
954 18976 2637 3247 2943 4338 1843 20707 11789 1094 15104 20084 14764 20708 16624 20709 20710 20711 14968
955 20712 20713 8849 20714 20715 20716 20717 20718 20719 20720 20721 20722 20723 20724 20725 20726 20727 20728 20729 20730 20731 20732 20733 20734 20735 20736 20737 20738 20739 20740 20741 20742 20743 20744 20745 20746 20747 20748 20749 20750 20692 20751 20752 20753 20754 20755 20756
956 20757 20758 20759 18177 7777 6991 20760 20761 7604 20762 20763 20764 20765 20766 20489 20490 20492 20767 20768
957 20769 10114 11261 11284 5530 5458 5484 10155 10120 15540 10124 11257 20770 5501 17409 11801 10191 10160 5554 5536 10125 10557 10911 10188 10122 10127 10707 10581 10153 20771 16455 9239 10897 10529 6753 10767 10110 10584 11241 13652 11231 5527 19450 13651 11417 20772 10142 5534 13053 15196 20773 20676 15544 5553 5547 10132 10130 5486 10165 20774 15545 10184 10913 10157 5459 11802 5560 20775 10892 18827 11277 20776 19449 11278 10923 19725 20777 13059 20402 15197 5213 10787 10549 18779 18824 13645 10108 13087 20778 2363 2319 372 766 8794 187 2145 13155 1831 1795 546 5006 20779 12144 1427 192
958 10832 11893 10167 5532 17550 10539 10140 11313 10542 9979 10547 20780 20781 11821 10889 11325 9980 11244 11246 20782 3778 3729 9984 17956 17965 18017 4735 7987 7779 3192 9978 11280 11279 9982 10725 9985 10581 10834 10835 11394 10730 10789 10543 10732 17565 11296 11224 10836 10534 10527 18779 20783 17551 10779 10780 10541 10731 10186 10532 10201 10718 17552 10950 11276 5214 5189 11812 16455 5503 11235 10559 10582 10565 10567 10724 10721 10537 5558 10728 10936 10528 18827 11245 9974 11220 10726 11435 10141 10552 10173 10734 15194 11389 10538 10926 17560 11424 10287 5458 5524 10578 10584 10837 5505 10191 5536 5535 10717 10128 10778 10933 10551 15195 17549 10126 10120 5456 10923 10908 1321 3026 2306 13130 298 3562 15555 20784 1571 16499 2252 3021 20785 15548 20786 17762 8199 19161 20787 12309 3155 7767 16071 7697 16180 12088 19167 11299 5533 10719 5527 7528 7501 126 5983 1216 7580 8083 3730 3746 18865 11255 10199 17554 10894 11806 9986 5459 10735 10838 3487 13078 20788 10526 10849 5534 10910
959 14929 718 719 7912 7915 7916 15606 15605 10694 8183 15603 3006 14690 7101 5680 20789 17745 20790 20791 20792 20793 20794 20795 20796 20797 20798 13628 1005 283 1004 5172 1317 11650 1006 3759 20799 20800 9882 20801 20802 325 323 303 296 553 292 208 2895 295 293 176 205 187 374 294 291 321 307 306 805 313 312 1571 189 2247 6372 1428 20803 17273 5442 3758 20804 8225 2363 3211 20282 3212 980 4207 978 981 20805 20806 18133 14433
960 20807 20531 20532 20808 20809 19117 19001 7545 19654 20810 20811 20812 20542 20813 20814 8868 17571 20815 16723 9918 8858 20816 20817 20536 20818 20535 20819 17576 20820 20821 20540 19670 16711 20822 20823 8847 19652 20824 20825 20539 20537 17580 8862
961 3186 12585 14461 20826 20827 6066 20828 17076 20829
962 20830 14375 2758 20831 2759 2781 19829 18342 20832 2853 18252 20833
963 2422 2470 1322 4501 7090 229 2478 6212 1237 2178 20834 7087 1209 17047 306 798 806 7080 16393 2249 1321 1174 7084 20835
964 805 296 774 10255 5421 203 10326 2097 20836 192 791 370 2071 14126 2246 20103 2263 9850 8789 11142 12140 5772 20837 8157 761 13800 176 6389 10797 2292 20838 4519 4582 20839 11134 197 2343 4609 20105 9830 10250 3079 12322 1473 3794 1430 3022 10248 4622 17903 2315 8155 458
965 4032 4144 9432 12334 14614 3956 1933 11525 4124 15742 1755 3937 1739 15740 733 671 15251 3889 1818 4026
966 20840 2337 2365 19547 12678 20841 20842 1334 19034 8704 19695 16000 20843 5223 11052 2971 20844 12522 141 2663 4914 20845 559 6142 369 545 812 15190 1209 2124 13580 2130 5886 192 1432 14817 805 19605 775 198 187 204 13211 5887 2108 1780 3471 3266 2127 553 208 20846 18684 12520 8715 10699 20847 19532 4207 20848 980
967 20849 2971 7353 10337 12928 14795 4911 15360 19476 2337 3077 16546 6609 1611 20850 7374 2343 5887 194 20851 3781 9864 1553 1604 16490 296 3736 3739 4215 6927 3095 14235 6023 780 2325 2347 2259 2327 1603 545 192 17053 20852 9852 2473 8884 3472 3096 2315 3107 1577 189 305 2139 15373 196 2088 1831 2362 3042 767 2511 1435 1554 2472 6589 4519 3105 6931 2483 300 2067 12540 7461 8313 2413 571 2960 3141 3215 20853 2365 1574 12301 11383 17235 17746 10371 9359 17008 4565 8298 529 20854 160 10694 18402 20855 20856 559 6558 20248 13800
968 14646 9274 519 20857 20369 17316 15717 20858
969 654 9264 3875 2961 4062 1818 1798 10597 1929 1875 12405 2273 13483 2386 2404 1771 605 14788 2415 20859 14863 15654 2055 874 1708 9924 2968 11546 3002 697 13208
970 14510 1746 11523 15247 15086 3826 3852 12560 20860 593 18531 3893 20228 1955 11544 564 10058 10052 2947 3932 19619 595 18004 673 7941 15239 586 4004 4175 2662 13543 3261 18430 20861 20862 20863 20864 17476 14315 12613 642 2800 877 3383 820 9298 2918 13444 13420 1708 15251 15240 9326 741 670 3123 4046 730 11511 731 1749 9924 2491 594 16582 16580 1730 1880 733 1850 714 600 4102 14696 3938 20865 20866 3933 10433 3194 7943 20227 3851 153 18679 12901 16583 15765 6478 8316 708 9989 1036 1841 8337 821 20867 4055 4214 652 2370 2922 7948 17933 11440 655 10432 4133 1818 935 1060 3373 19457 11100 14600 15314 653 4010 6850 3882 17990 4783 20868 13585 14799 4045 16615 20869 18681 15471 1096 893 8331 18013 8332 10589 9432 3910 5059 3918 8336 6523 3930 713 1936 7758 18690 11439 1029 16563 152 150 145 15093 10438 10040 7894 11124 11465 16027 20870 20871 9473 20872 1067 12332 15489 11769 17989 13584 7897 20873 2638 18692 6694 20874 3323 8140 1731 4232 20875 4177 8252 20876 1821 10434 3835 20877 3377 2388 15296 20878 892 11099 20292 20879 4082 696 13166 934 5126 16616 4186 18002 13569 11796 2681 20880 14916 1814 1747 15257 3974 12559 3372 147 3895 4136 1853 13522 14703 8121 672 15661 4900 1933 591 6750 20881 17513 3971 10035 18680 20882 846 20883 9329 15273 18687 991 848 3847 6666 20884 16671 465 20885 11527 4150 149 689 16647 14773 20886 1078 18005 674 6687 20887 1843 10412 12589 7262 12984 3354 6673 461 20888 693 11478 5135 11482 571 18696 711 3229 13404 12725 3931 1725 744 1766 8269 11471 3382 4067 8124 867
971 20889 13005 20890 15821 4684 545 2102 4523 1433 6130 2899 4606 1781 1783 2093 1797 1448 3266 4465 369 20891 6207 559 20031 20892 15770 20893 9915
972 3063 4253 3065 20894 1353 8469 17094 20895 20896 20897 15517 20898 20899 11748 19888 13342 13721 13719 18617 20900 5136 2283 7452 13917 562 20901 20604 18466 5319 18216
973 15906 12286 20902 3522 307 9781 18733 18738 18739 18737 18740 18743 18742 18741 18734 5192 4622 20903 13324 208 303 16516 20904 18653 20905 1553 12304 4575 4585 20906 20907 8795 8730 20908 5775 10228 3732 8792 6385 9947 559 20909 18572 3795 18746 3101 13144 13317 1430 20910 20911 2127 2242 8595 13141 176 374 15417 8054 5300 8636 12298 8625 10411 8800 8632 20912 11362
974 4733 4771 20913 4890 18288 4735 15000 10861 3296 12221 14965 4853 10860 4762 20914 20915 20916 4716 20917 20918 6758 15334 4818 5017 12122 4785 4725 4764 3611 6771 16235 4728 4827 4828 4820 10866 20919 10859 19861 4824 3618 20920 6745 835 18334 16399 5594 4861
975 2271 1292 19567 4371 2172 2512 3511 20921 20922 3438 3529 3778 2541 8875 3445 3457 3432 20923 3501 20924 4477 1236 4276 3064
976 20925 20926 7979 3192 283 8095 20927 8704
977 283 7979 16455 978 10290 3271 11058 3211 11946 980 20928 12393
978 20929 978 12438 20930 15182 20931 15178 20932 13370 20933 20934 20935 4288 20936 16163 20937 9543 20938 6662 12458 20939 20940 3537 20941 20942 20943 13368 20944 20945 13369 20946 15179 20947 17691 20948 15177 15188 20949 1537 12478 1463 1493 1509 1511 1284 3812 5195 5196 8388 1314 1508 256 257 258 1526 12491 1513 1500 4994 1492
979 20950 15821 17630 20951 7997 18056 7452 3310 4402 2525 19659
980 19038 20952 19551 19033 20953 20954 8704 20955 8175 12677 20568 12678 20926 5905 4417 19531
981 1194 1645 18222 18614 211 1674 20956 20957 17607 20008 2271 10752 1648 15971 8224 1162 20958 8218 20959 2585 1181 2586 1253 5657 6913 20960 1647 8882 2611 6915 20961 7685 1670 1299 3777 1625 1186 16820 20962 20963 16789 2363 2223 4388 6548 19982 20964 5795 20965 12421 20966 8975 6897 15945 1703 16792 1242 6899 11072 2337 7642 14031 17662 7641 10753 376 1678 9249 5629 9694 15970 12417 5354 20967 20968 6097 1700 6280 177 20969 20273 1693 6153 2193 1701 15981 20970 20011 369 18954 301 766 20971 765 2253 772 553 2887 4654 5389 293 802 372 1321 9254 20972 1666 1241 10335 6914 2569 1679 15966 18225 6875 18219 8211 16819 2222 20973 20974 6917 1218 4385 15964 20975 1537 6733 15013 14325 17383 10953 12627 5199 20976 1500 4994 1492 8570 13277 276 5181 14590 1493 20977 17093 17149 5131 14832 8435 5171 20978 17356 17120 5180 20979 8571 17352 1506 1509 20980 1504 20981 13502 3819 17285 17735 17365 3800 8501 8510 20982 13839 5172 456 160 20983 5677 20984 3456 20985 20986 6903 20987 6906 20988 4546 6889 14120 2175 20989 2565 2195 1398 3110 18265 180 1676 20990 18930 1696 20991 4488 15936 2207 12424 16791 15941 6918 1352
982 13277 12329 4329 4328 4327 1545 1502 1500 5198 257 14831 3409 8571 5685 1463 20992 8024 5373 12622 17222 3800 17201 1492 276 8436 5181 1509 20993 20994 12623 13491 1512 1511 1508 17093 17120 7118 1513 20995 14832 5131 1515 12491 12489 12488 1520 1521 12487 20996 13493 2647 20997 17390 1493 20998 4200 4194 12340 4202 10694 456 10918 8231 1395 11429 5215 11231 10554 1332 1230 15379 5530 10943 10096 12466 1800 7838 20999 4740 20479 14794 12917 16388 5536 9240 318 10366 10393 10244 21000 372 293 205 194 6610 6593 3099 186 2142 2076 12170 2464 10400 187 176 3267 10719 10843 10091 10115 21001 10153 11224 11421 1537 1526 21002 6733 21003 13035 21004 1496 20615 21005 13479 251 1546 4994 14807
983 21006 19358 1801 7838 3616 6769 4764 16637 4725 4722 16656 4824 5047 4826 5048 18559
984 11380 8602 12320 2526 14144 14181 11702 12298 12265 524 10378 9293 3097 2473 16525 14244 10250 14214 2264 5008 1430 9939 14213 8734 11339 14228 2253 529 11338 331 15414 14149 21007 21008 6630 14254 3059 309 3039 2246 316 13898 8258 1183 12150 9348 2907 559 2337 19743 7989 12256 21009 21010 21011 21012 17167 6142 6800 8773 21013 12179 21014 9365 21015 619 12160 12180 12554 558 6379 17007 454 21016 1593 3070 8799 2135 21017 9822 2305 2361 14814 160 6327 1302 2616 14840 17017 13144 21018 8621 13671 527 2299 2344
985 21019 2520 2662 18195 11275 21020 15362 21021 19013 8223 6345 21022 3687 180 1227 1262 6221 2177 222 10942 5560 11422 2478 2589 1191 5675 1625 4596 5628 1248 7085 2222 21023 192 2473 3794 2327 2315 2259 189 3107 15373 623 774 2511 5887 2584 4536 1632 1115 2421 2507 2519 1211 3624 21024 3668 2582 21025 2180 1233 21026 1136 21027 3719 6233 8279 5622 8163 5447 11452 5448 6111 1352 7529 8266 4294 4244 12949 21028 247 7427 8987 7326 5673 18910 18230 3645 3637 6244 8277 1631 1182 1212 8245 5672 1237 10694 21029 1128 21030 9106 2633 5706 4514
986 1350 18928 1177 1698 6876 21031 18969 1663 14836 6897 6888 20987 2558 1224 1638 6891 1287 3808 161 10525 904 522 907 170 12603 10511 513 494 10485 9770 10524 10499
987 10536 5214 5189 11810 10139 10135 5539 10722 11893 9241 5455 10897 17556 10925 2201 10839 11397 11246 10923 5527 5447 11252 10933 11293 11220 10908 10850 5488 17557 11197 10789 10209 10756 10787 10911 10585 5505 10091 10847 18913 10223 5558 11240 10554 10843 10848 9239 11428 10581 10777 9985 10750 10143 9986 10167 10912 10551 11452 11300 10140 17558 10124 11200 10905 10547 10934 5541
988 10536 21032 2201 11230 18900 10905 10224 10146 10890 10735 20769 10932 10886 10223 10091 11282 10732 10108 17566 21033 11435 21034 10585 10933 10584 11805 5541 5536 11428 5532 9980 11819 19427 10904 13087 10195 11800 10837 10575 10941 11816 5344 5452 10891 5447 10145 10731 11238
989 2525 2415 15110 1870 1829 4818 4798 870
990 21035 4421 21036 20902 21037 12570 10303 3138 12304 12326 21038
991 386 1644 6094 18911 11300 6274 8342 6551 3433 389 388 2260 345 344 6306 6528 1183 5553 2163 5822 1394 5820 9291 13132 10318 21039 16456 2453 4364 2575 12667 18839 18838 1415 18840 21040 20986 21041 213 365 333 5841 5845 337 1399 346 6543 9070 8949 2418 1623 20774 10124 13059 10126 10120 5456 5457 10132 10127 10923 21042 14500 9145 4354 6527 377 6263 5846 9080 183 14481 14487 6433 21043 5839 6330 340 341 425 5840 2296 390 13524 19565 433 21044 5833 4359 5148 5832 16464 5321 10516 11736 21045 15528 1242 21046 7480 21047 15438 21048 7481 4357 9074 5792 2261 21049 5316 482 5791 9072 378 14485 8892 13530 9068 21050 4499 343 5824 5793 5794 18165 21051 21052 1416 5795 5068 18197 18170 4383 2172 20921 21053 4396 5314 19594 19592 19593 21054 21055 21056 5848 5847 3626 3627 2427 19596 1128 9073 9071 21057 444 9069 5790 18169 21058 9098
992 2466 3772 7518 4575 5635 306 805 4572 13801 21059 1593 319 3268 20259 1620 2289 3059 12144 6204 13574 729 141 552 16493 21060 16486 529 3022 10255 6589 3094 14238 1537 21061 21062 21063 2220 9528 13915 203 2363 11038 19185 2971 21064 14220 192 21065 6942 545 3463 305 208 369 206 782 3266 187 792 293 3267 3475 2305 2362 2258 9851 8693 16500 13682 19386 2337 470 565 1717 3206 7745 3946 8332 1723 4079 1428 1473 17060 21066 3092 7353 5378 2472 1430 12306 3768 16544 8511 21067 1310 3189 1609 1601 2315 5379 798 21068 3030 2071 5615 8895 3071 21069 3793 12301 2460 3420 1552 307 21070 16996 2255 13798 4646 12557 4526
993 11572 21071 13731 18286 21072 4118 7760 3382 693 7617 9288 7618 13166 838 4160 1933 3310 744 1930 7486 1728 707 1729 468 9923 1959 593 11869 2525 11581 11582 21073 21074 21075 21076 3341 21077 21078 11588 2337 21079 21080 21081 12911 4220 1662 21082 21083 5720 21084 21085 3334 11593 11578 21086 21087 21088 11608 5735 21089 21090 13724 13727 21091 21092 11598 21093 21094 21095 21096 21097 21098 21099 21100 1661 21101 11607 2219 2220 2662 21102 21103 21104 13732 21105 21106 21107 11576
994 10536 10748 11245 10783 11806 13768 17752 11425
995 11263 15196 11823 5450 10738 10217 10739 10737 10736 10192 10740 10161 10125 10117 5501 11259 18909 13950 10151 10121 5456 10120 10129 10128 11264 10551 10159 10158 10152 5554 10155 10150 11411 10123 11269 19724 5524 10190 13644 10174 10783 10165 18867 21108 10847 10220 5457 1330 10127 11282 10171 10130 10735 5551 5461 21109 16455 10923 1335 14818 1674 6294 128 10579 16396 21110 15545 5469 11257
996 2997 893 9480 21111 559 2097 545 6131
997 1947 4006 1755 21112 2411 561 654 1088 1708 600 19749 917 13844 3872 6492 21113 632 9344 4075 4176 4007 560 2383 21114 820 12928
998 21115 20683 21116 21117 21118 21119 21120 21121 21122 20723 21123 21124 20730 21125 21126 21127 21128 21129 21130 21131 20744 21132 21133 21134 21135 21136 21137 21138 21139 21140 21141 21142 10879 20740 21143 21144 21145 21146 21147 21148 21149 21150 21151 21152 21153 21154 21155 21156 21157 21158 21159 21160 21161 21162 21163 21164 21165 21166 21167 21168 21169 21170 20735 21171 21172 21173 20727 20689 21174 21175 21176 20742 21177 21178 21179 21180 21181 20753 20732 21182
999 718 7916 4294 21183 7310 4250 7306 9577 4262 274 10891 11077 11411 10554 11422 11800 11230 10938 13088 13655 11390 10843 21184 15545 11416 11260 5541
1000 2192 129 10808 12608 211 1357 16922 2015 2533 15533 2016 825 829 1808 2096 2092 1421 2089 545 316 4611 21185 6822 16536 16537 8597 1428 447 4627 18156 1429 801 409 1430 3105 195 16521 6829 1431 292 369 8757 2078 1436 1437 21186 550 1591 2359 176 6131 15898 1441 12139 14190 14275 14200 1210 6831 192 2065 7199 4617 7543 160 1348 19324 16456 21187 2496 21188 21189 21190 9171 6346 16454 6909 9945 21191 21192 3448 21193
1001 9914 11079 16437 19684 161 16213 17816 6860 4289 21194 21195 21196 18987 12373
1002 3522 13324 19561 21197 8070 20905 21198 6717 20011 10411 4569 3070 5775 559 3732 21199 8615 4519 18572 3101 13317 1430 21200 9701 21201 10325 12298
1003 5470 11298 21202 13650 9240 11401 17409 5560 13607 5214 5536 5555 11818 10706 10710 16396 5558 10287 10851 15539 19407 19406 19160 21203 17414 13942 11234 10742 20400 16472 21204 21205 21206 21207 13652 21208 19755 20772 17412 17410 10095 3746 4660 21209 4658 17563 10118 6753 20775 10855 13084 21210 10155 5534 16473 10712 11398 21211 5212 21212 10785 2203 160 10897 21213 21214 10842
1004 11234 18424 5451 11319 5553 5502 11417 18823 5539 11433 5458 10179 10850 21215 11390 15195 10783 21216 10291 11410 5530 10150 11421 11318 11806 11298 19449 13764 5551 19450 13088 5560 20770 21108 5459 11195 10122 18826 5557 13055 21217 5552 6753 10944 10527 5532 15197 13644 11206 5527 11425 10755 13763 18236 17014 5470 10586 10091 11277 5190 4545 21218 21219 14037 4905 7994 21220 19733 4543 18758 2334 21221 21222
1005 10146 10706 21202 11402 21223 21224 13946 13062 21225 21226 10583 10787 5487 10785 18826 21227 21205 11818 13083 13652 10784 10924 21228 10109 11401 17412 21229 5532 13942 21230 21231 13944
1006 11402 17409 10146 5536 15538 18907 11206 18869 10757 21232 10547 10139 21233 10707 10843 5559 11800 10702 11324 10789
1007 10785 10784 10732 9984 10831 11198 11201 11244 17558 11240 10791 11238 10843 10526 10527 10533 10556 10114 10203 10115 10204 17562 10569 10580 20772 17409 2202 18912 10723 5536 10107 10734 10733 10933 10135 10139 13056 10917 20780 15560 10196 5532 9979 10199 10198 11274 10197 10173 10547 15194 10907 19752 10844 21234 10583 17553 19756
1008 4092 2972 19220 718 15081 7492 3869 7490 3317 12212 4232 1728 1918 3375 3376 8128 9330 17649 460 2493
1009 18679 18174 18696 15479 10426 10453 721 14437 21235 16245 4153 2014 7467 21236 2018 21237 9206 7206 21238 14851 15480 21239 14853 7282 19808 21240 2840 2734 722 12648 21241 20378 21242 21243 5184 5182 17296 256 21244 12618 21245 257 17091 21246 1526 13512 17092 13509 2647 13511 5186 5187 2648 17100 10953 1500 8836 8491 1546 4994 5138 8034 17154 1532 17127 1463 15059 14833 1311 12653 1684 1513 8832 258 21247 11837 1508 1509 1685 21248 19693 2019 976 16246 14844 14860 21249 15477 20222 11516 19439 21250 9925 16253 15246 21251 7473 16015 7748 16215 253 15878 17305 5195 17153 21252 17286 1551 14856 837 14732 13441 19421 21253
1010 19383 4202 21254 17403 21255 21256 21257 21258 16145 21259 16134 16141 16120 21260 19125 16129 21261 16135 13262 13268 4194 15741 13722 21262
1011 10146 21228 10109 11403 10583 21225 15539 10851 10841 11417 21229 10924 10215 10787 5487 18234 21205 11818 20772 17412 10125
1012 14530 21263 17021 15402 17020 14576 14563 15395 14572 14586
1013 7430 7431 274 7420 18878 5438 5439 4272 3064 7306 5340 21183 4269 11640 7319 4250 4271 21264 4273 269 18880 7435 7434 4270
1014 21265 21266 17754 8266 6999 6993 6994 2971 721 5237 18093 18086 11723 21267 2709 5104 16764 17827 16753 17790 17774 5099 21268 19430 2740 3504 2773 2778 2872 2659 2748 2753 2843 19808 7287 18482 2876 7135 12899 7136 12898 19812 12897 7137 12612 642 1551
1015 7468 17958 13552 16567 12059 16961 13248 12049 21269 12077 17974 6922 17984
1016 21270 7845 2673 13659 9930 208 2119 756 2067 529 556 553 292 1706 201 21271 18730 20512 20511 15384 21272 5834 20169 2660 9391 21273 7417 2124 331 21274 16787 15922 3054 13666 21275 9512
1017 4916 4813 14962 4815 21276 4865 3230 21277 7890 7889 7888 21278 13810 14963 4902 4742 4886 4853 21279 21280 21281 21282
1018 16145 19653 21283 21284 21285 21286 8847 8868 21287
1019 11424 11422 11206 10942 10551 11293 5532 10905 10115 11256 10579 10204 10849 11390
1020 718 1538 9041 9975 11265 1307 9013 20769 10164 11220 18825 11282 10123 16455 11320 13763 11225 13944 13087 5561 10891 10890 19753 333 6528 13766 20783 15199 21288 10783 10122 5485 10554 11651 18234 5557 11801 11649 11278 18779 10777 10923 10221 19448 21217 12452 11400 5553 13644 17552 10095 18864 10547 5469 5500 10897 5468 5475 11237 21289 2363 2203 18424 13061 10787 10900 20773 19450
1021 5250 12012 12011 12013 11996 18090 11999 12000 9522 2525 1855 1845 1857 12005 2943 934 917 3926 1854 12007
1022 18066 12012 19225 12440 718 978 5906 14882 5926 5913 18361 18366 21290 5932 5905
1023 77 6007 21291 81 18819 6019 16206 21292 5967 6000 6006 4674 69 9410 1459 5989 1215 8996 15036 9008 15040 5986 21293 5999 8072 118 15289 8365 5987 10996 7595 5980 21294 10976 21295 8092 1236 1242 3419 126 8094 21296 194 800 14279 7656 160 6011 7525 1217 3191 6117
1024 15212 3347 468 3846 12740 4172 1842 1844 141 2337 2635 995 1746 19468 21297 941 8341 1039 15677 11609 4780 4231 1061 2525 10694 3012 14409 978 18785 2983 1054 6469 21298 21299 12757 15697 1082 3297 3000 12355 3968 2984 3397 15214 21300 692 10615 21301 4203 16410 21302 15100 9314 21303 4217 3014 3357 12745 1063 14767 1031 943
1025 9244 1302 1182 1647 211 21304 21305 21306 11827 21307 21308 15958 2480 2195 8950 2591 6297 1262 14836 1809 4432 18264 2225 1408 2180 2205
1026 15321 15319 15318 10229 12275 540 559 6799 6800 9290 6801 6149 6798 21309 11967 16525 20903 8649 8600 18573 8651 21310 10298 10303 3795 14264 11147 6804 14206 8295 1581 16514 5881 6576 6587 6825 437 8736
1027 1891 14511 944 2961 3849 3199 718 2525 837 1995 15091 945 11484 13484 2282 15464 1818 1732 15281 14529 10042 1933 714 21311 1755 16034 2970 564 10607 828 15753 17514 8302
1028 21312 21313 8906 15355 15353 18625 21314 20890 20889 13007 21315 13016 13859 15791 15789 21316 13005 21317 21318 21319 15788 4684 17627 13851 13855 13860
1029 21320 21321 21322 21323 21174 20754 20744 21324 21325
1030 17489 19001 21326 19107 20395 9918 21327 19652 21287 21328 19004 20824
1031 20712 21329 21330 21331 21332 21333 21334 21335 21336 21337 21338 21339 21340 21341 21342 21343 21344 21345 21346 21347 21348 8849 21349 21350 21351 21352 21353 21354 21355 21356 21357 21358 21359 21158 21360 21361 21362 21363 21364 21365 21366 21367
1032 10702 10705 10720 21214 18232 20769 17563 18874 18872 10742 5470 5484 5458
1033 21254 21368 21369 21370 21371 9920 9914 20536 19109 19653 8847 21372 19007 21373 21374 21375 21376 20816 21377 20814
1034 17691 6659 11746 21378 11756 7408 16586 2739 19723 2659 21379 19147 14633 6669 17029 19715 11831 13808 15188 7605 4207 1996 15339 8963 9206 21380 8367 7209 2018 7205 2016 21381 5512 12815 17040 12798 1998
1035 21382 18683 19031 8704 6790 6789 6794 6792 6793 6791 19531 20953 19038 21383 21384 19538 19039 21385 19521
1036 19530 21386 8702 8095 8719 12678 21387 8708 19545 21388 21389 20953 21390 12679 2662 8703
1037 2337 7831 8542 978 6219 21391 21392 21393 21394
1038 12072 18555 21395 3606 21396 18557 21397 21398 21399 19309 16382 17687 2334 14789 21400 19493 7742 19632 21401 13229 13847 13220 13223 12904 21402 13253 13235 19497 21403 20483 18758 4910 18396 15326 21404 21405 13227 13230 7457 16586 13868 7130 7233 2659 2814 17846 19502 9186 18113 7451 21406 1800 16374 11845 13224 10875 7852 12919 21407 16952 21408 7612 18312 18356 13429 21409 12263 21410 12029 14791 21411 16975
1039 13650 10843 17409 2203 5172 21412 21413 1549 21414 17343 8836 17144 13502 8404
1040 21415 21416 7424 1538 2525 12958 16429 21417 21418 21419 14810 20342 16423 16424 21420 16434 20340 20347 12957 21421 16435 16421 20355 21422 16440 20122 7453 18396 5492 17394 21423 7612 7868 9971 8532 14046 17264 21424 21425 21426 7848 12116 13986 14047 17262 21427 7993 17717 12031 13968 21428 19303 13971 16636 14029 7579 1811 16846 2334 18185 14637 12468 13999 14987 12916 19494 17324 9281 3485 4430 2337 3610 21429
1041 2337 12532 2635 2972 16114 4232 2365 1551 722 878
1042 839 2396 3981 182 1923 12328 3329 2404 7960 615 12330 12694
1043 2179 185 5692 1122 11387 7074 9048 1121 2610 21430 6090 1199 5670 3689 2595 8871 1227 21431 1305 9110 1298 2449 1303 2426 2537 15501 1196 1625 6226
1044 21432 6260 2163 18891 6910 21433 6922 21434
1045 10150 10783 10217 10892 10128 21042 11264 5487 5501 11260 5451 16455 19450 5488 19724 10102 11303 10161 10159 19453 5553 10551 13053 5073
1046 21435 21436 21437 16263 16265 21438 16321 19082 19554 5331
1047 11828 11727 21439 21308 17757 2538 21440 21441
1048 21442 12948 4820 5017 5446 21443 3154 837 51 18797 6450
1049 15299 7476 4813 4774 15000 21444 3611 4719 4890 21219 21443 21445 16569 4899 21446 5020 21447 4785 16235 3225 21448 5024 7455 10856 16385 14990 21449 3607 4827 4829 16877 4818
1050 21450 21451 21452 1660 21453 21454 1656 21455 2341 21456 11600 21072 11581 21457 21458 11588 2929 735 705 155 7746 21459 21460 21461 511 509 21462 1811 21463 11579 21090 21464 7754 5735 21465 21083 21466 21467 21468 21469
1051 21470 18944 18945 18946 21471 14781 14782 14783 13200 14784 14785 14786 13199 21472 21473 21474 21475 20951 15355 21476 3604 8931 8941 8936 13016 21477 21319 13012 21478 21479 21480 13007 21481 3591 15854 18949 13348 19379 8118 11672 15357 21312 17637 31 21482 21483 21484 21485 21486 18988 21487 21488 21489 21490 21491 21492 21493 13010 10649 10651 16685 35 36 39 37 22 12 11 21494 15820 4685 15358 13045 4684 21495 15353 21496 21497 13009 13011 21498 21499 15351 21500 21501 21502 10634 10661 19760 15848 48 21317 21503 21504 13859 21316 13005 21505 21313 21506 21507 21508 21509 18623 13856 13006 18624 13857 13855 13858 18625 21510 13015 13861 18057 21511 21318 21512 21513 15359 20889 13860 13851 13021 21514 21515 1742 3973 1067 3925 744 1938 8252 468 593 1930 11438 674 969 589 18004 1717 1937 7929
1052 21516 21322 21517 21518 21519 21520 21521 21135 21522 21523 21524 21525 21526 21527 21528 21132 21529 21530 20741 21531 21532 21151 21533 21534 21535 21536 21537 20686 20754 21538 21539 21540 21541 543 21542 21543 21544 21545 21546 21547 21548 21549 21550 21551 20681 21552 21553 21554 21555 21556 21557
1053 13567 17391 3008 3410 8393 1492 21558 14329 5429 3171 1551 19727 21559 21560 1495 1500 21561 21562 21563 13504 8385 258 257 1526 256 1513 1515 1509 6079 21564 21565 1493 5169 21566 1309 3190 3189 21567 243 262 247 266 246 269 274 7427 5438 7306 11636 21568 21569 21570
1054 21536 20680 21571 4202 21572 21573 21574 21575 21576 21324 21577 20730 21578 20687 21132 21133 21176 20749 20734 21579 21580 20753 21581
1055 21582 9914 2525 7491 6855 7634 609 2004 833 15338 1933 571 4119 2658 9920 17484 21583 21364 21358 21584 21585 21586 21587 21588 21340 21589 21590 21591 21592 21593 21594 21595 21596 20746 20727 21597 21598 21599 21600 21601 21602 21603 21604 21605 21606 21607 21608 21609 21610 21611 21612 21613 21614 21615 21616 21617 21618 21619 21620 21621 21622 21623 21624 21625 21626 21627 21628 21629 21630 21631 21632 21633 21634 21635 21636 21637
1056 56 55 64 53 3 60 8077 59 21638 99 8360 103 57 62 54 11017 7501 77 7500 73 72 74 7495 80 65 21639 6018 6008 16209 5964 7536 7535 7581 8092 11056 5962 7531 16206 6019 18629 5979 6014 10979 79 6006 71 76 7603 11016 1458 78 11015 16212 5966 7589 4672 7591 10983 93 84 67 7541 7 115 7496 7511 5980 87 121 1215 4 89 88 7508 5965 8356 6010 4674 4673 7599 119 7499 5971 1461 7483 21296 113 8085 8084 8083 8088 16828 3193 18631 8079 8076 8089 7602 5970 1459 0 10984 58 61 11961 70 52 7497 63 101 11036 8361 81 82 83 21640 6007 8365 7587 125 116 10957 21641 10964 7600 7606 6012 7521 11024 11959 6021 11960 96 100 86 110 92 112 111 102 8075 90 109 94 66 7538 21293 8078 69 7513 1213 2 1 114 21642 20503 21643 11740 21644 18795 20502 21645 18813 21646 20398 21647 14891 21648 8718 8706 8704 8705 6790 6794 8707 6792 6789 8709 6793 8708 6791 21649 21650 8711 8710 20846 8712 19537 8703 12679 8724 21651 8713 8714 21652 8715 3220 5992 20451 11076 1217 8197 11074 11075 11057 1218 4469 16820 21653 2363 14690 17534 7681 6037 15985 5466 15986 4416 5465 16194 21654 21655 17533 17532 21656 7743 17531 17530 1811 8073 21657 563 11081 7590 6011 10802 16819 11034 16449 16450 5665 21658 21659 21660 7763 16445 21661 5667 21662 16444 21663 20332 14845 21664 21665 21666 2432 2221 2204 10335 1352 2223 8196 75 16838 11082 9206 9216 21380
1057 21667 7141 2054 718 17333 13929 3316 14723 12587 13572 1933 12591 714 970 2525 1538 6521
1058 21668 4627 11134 7368 2472 805 12131 559 6987 11616 15168 16057 21669 2652 11615 4645 15158 3582 3575 9436 14425 21670 1014 21671 21672 21673 16041 12507 1010 21674 19245 16069 11620 16047 18130 21675 20368 21676 14431 3536 21677 6398 5172 1023 285 286 21678 1017 15167 21679 3579 15715
1059 2647 257 8509 9125 21680 12493 5198 17078 17107 17093 17108 17074 17303 10953 5199 17111 1681 1529 3802 17352 1509 1511 1508 14441 19689 3805 4994 4995 1496 1495 1493 3800 5175 1499 5176 8443 1498 17278 12476 12481 12484 8440 12478 12482 8442 2669 1500 17279 12499 8396 7335 21681 17364 16779 5686 6083 18241 18240 17276 17281 8441 5430 18141 21682 8399
1060 1735 1067 7649 12911 21683 21684 17590 20147 7865 21685 12916 12909
1061 13282 15151 15147 21686 13279 15098 15716 16062 16061 13274 21687 21688 1017 21689 18129 5272 5275 18503 5270 16052 21671 12525 12524 17211 21690 12495 13273 722
1062 21691 21692 21693 21694 21695 21696 21540 21350 21364 20727 21697 20714 21698 21699 21150 21700 21523 21701 21702 21703 17484 21531 21636 21704 21705 20728 21706 21117 21342 21349 20713 21707
1063 21708 16208 17567 11427 10578 10543 9984 10544 9705 21709 18840 14159 9048 21710 13537 21711 1692 21712 21713 9688 21714 10717 10846 10788 10289 10292 21715 9506 14744 18674 2525 4073 17926 714 463 12534 1937 15637 9270 4008 8537 9531
1064 21716 16262 10968 13184 16261 16266 21717 7464 16321 2908 15338 9223 21718 17041 21719 7209 20648
1065 12454 12455 21720 21721 21722 21723 21724 7427 5438 4273 13922 11877 11887 9900 9524 521 522 9770 10484 21725
1066 13101 13102 21726 13105 14092 4207 2976 722 19379 5908 1516 17144 14343
1067 5327 143 16314 5047 5017 16643 18015 5326 16308 16262 17738 7626 16320 21727 16298 21436 21728 16265 7630 16309 11807 7612 2334 17226
1068 2382 13389 4012 15276 2934 632 4082 15740 4173 571 16603
1069 21729 17816 19907 19971 19921 9766 21730 21731 10508 5358 21732 499 12602 14873 10524 493 904 21733 11746 517 516 21734 520 6696 9543 20937 21735 165 489 484 485 21736 164 502 492 170 21737 19896 512 19878 21738 21739 161 496 500 497
1070 11579 21740 21741 21091 21742 21743 21744 21745 21746 21747 17592 21090 21748 21749 21750 21751 21752 21093 21753 21754 21755 21756 21757 21758 21759 21760 21761 21762 11601 5734 5732 1652 21763 21463 21764 21077 21765 21078 13732 5731 21766 11608 21087 21767 3337 21768 21769 11597 21770 21771 11583 21772 21773 1657 5738 21774 11572 21775 21776 21777 21778 21779 13725 21780 21781 18299 21782 21783 21784 21785 21786 21787 21788 21789 21790 11575 21791 21103 21792 21793 21794 5730 21096 21795 21796 1655 21797 11588 21798 13727 21799 21800 21801 3336 21802 1660 21803 5721 21804 21805 21806 21807 21808 21809 21810 5726 21811 16260 18015 141 1811 20441 545 277 1831 1795 2319 299 176 205 296 2065 195 324 208 189 206 6395 10397 8744 1208 19833 292 1428 801 1777 4526 2064 550 805 10234 4606 207 782 307 8597 553 4628 2362 192 1320 302 1588 1788 792 815 559 2907 283 21812 11574 21073 21813 21814 21815 21816 21817 21818 21819 21820 21821 21822 21823 12930 21824 21092 21825 11590 21826 16109 3341 21827 3344 21828 21829 21830 21831 17595 21832 3345 21833 21834 21835 21836 21837 21838 21099 21839 13730 11602 5733 21840 16948 17961 4895 4892 4894 4900
1071 1314 2668 16682 17364 3586 1493 8446 8516 6733 14323 13550 1312 1509 1500 1502 21841 17093 5685 8388 14318 1268 4289 21842 18364 18276 14891
1072 17410 6753 5189 21843 11257 21844 13650 13944 10105 21845 13942 10895
1073 10284 10095 10102 10945 10903 13063 10918 5488 5456 10171 5502 13950 11260 21033 10103 10139 10140 12452 18908 11278 17567 21217 10122 21846 5538 10734 10168 11295
1074 11822 10196 10787 10788 10711 10716 21847 10581 1330 10930 10843 17566 10791
1075 10007 5285 12475 5430 10809 3576 1023 15348 11615 21848 287 16054 9871 3564 21849 10322 15585 21690 19245 15169 1015 2655 16045
1076 14744 21850 18853 21851 16159 9533 6817 21852 21388
1077 12115 21853 14010 7450 14030 7865 8529 21854 12916
1078 16624 4809 4110 15496 1959 1711 469 1933 1955 14707 7452 714 713 1928 1927 21855
1079 21856 21857 21858 21859 21860 21861 4195 21181 21862 21863 21864
1080 21546 21132 9585 21865 21866 21177 21867 21868 21869 21870
1081 21871 21872 21873 21874 21875 21876 19383 21877 4202 21878 21879 21880 21881
1082 11402 21882 10146 11403 11224 18907 13084 15578 19351 18853 21233 3261 1811
1083 21883 21884 21693 21885 21886 21887 21888 21889 21890 21891 21892 21893 21894 10879 21895 21896 21897 21898 21899 21900 21901 21902 21903 21904 21905 21906 21907 21908 21909 21910 274 598 468 21911 21912 21913 21914
1084 4202 21915 21916 21917 21918 21919 21920 21921 21922 21923 21924 21925 21926 21927 21928 21929 21930 21931 21181 21932 21933 21934 21935 21936 21937 21938 21939 21940 21941 21621 20713 21115 20730 21942 21943 21944 21945 21946 21947 21948 4236 21949 21950 11535 1933 4160 7894 4345 3946 733 14734
1085 983 6685 951 19751 12743 8255 10011 1038 9319 1082 19866 10020 2793 16237 12211 928 1991 1977 15681 21951 4136 2050 21952 4189 16901 14603 16900 21953 21954 21955 21956 21957 21958 3121 12784 9316 1102 10009 2283 15096 4232 1053 2975 12785 12346 12788 1057 12889 1063 10026 4347 1040 15214 16233 6512 9318 19084 15110 6052 18783 19483 469 6041 12224 16103 1957 1955 18529 4159 1954 21959 701 1101 1051 15764 822 13076 828 8968 2533 18488 12355 18489 21960 2982 11604 930 18418 931 10024 3154 6494 21961 4409 4408 4407 12825 4168 8955 12345 8276 940 14456 9988 12225 2534 21962 3016 15462 996 943 9735 9736 1074 913 2913 9738 10018 2972 6487 12792 12793 21963 21964 21965 8423 8520 12828 963 21966 21967 12348 15687 14670 3310 1962 11106 21968 918 12710 11519 12702 465 1933 474 12936 15071 16345 18280 11473 464 3870 11517 20879 11124 992 21969 9737 985 912 1039 914 10016 9472 1108 984 1083 10027 19495 21297 18530 8322 3317 21970 14453 6937 15679 10008 15680 12217 3832 18478 9471 6497 16340 12571 16341 1047 2789 2790 15211 2677 11777 2910 2375 21303 630 21971 1059 948 2914 3385 17523 19270 21972 21973 15694 2658 19473 16342 8275 3374 982 21974 21975 987 962 4147 4217 19867 18046 19078 15683 21976 14769 20618 18048 1081 959 9989 2799 21977 923 922 1049 15677 1058 4343 10599 14595 15682 19458 1103 1041 964 986 949 15676 11609 1086 15527 2047 21978 1994 6668 1662 1650 7755 11572 21979 21980 21787 11584 21981 21750 18299 21982 21983 21984 21985 21986 21453 21987 21988 7756 21989 21990 21991 1660 3342 5721 11577 18297 3334 18300 5730 5731 21992 21083 2337 21993 838 21994 598 21995 950 17420 2977 16883 21996 16884 11683 11684 21997 21998 21999 22000 22001 22002 22003 1105 22004 21298 2786 11770 12596 12050 7461 16618 16619 12214 12771 22005 9723 7619 4119 18528 655 22006 3199 3197 468 467 3202 3349 16025 917 22007 9287 1033 19865 1986 714 712 22008 17478 22009 3370 20126 12741 1056 3357 22010 153 693 2993 22011
1086 17651 4937 18069 12012 718 15591 15592 18097 19019 18450 18454 4972 4952 22012 14729 22013 10967 5328 16270 18706 16268 141 22014 19540 22015 8095 7605 13560 5242 20456 20453 9532 16188 22016 5717 18059
1087 11484 3900 7488 15241 702 14608 1096 3373 11131 11552 3008 13017 22017 2043 3199 3955 1897 1078 7258 729 2038 605 2387 888 12405 15512 9211 9197 3898 2662 2493 13378 3920 7959 2530 991 155 22018 22019 22020 15465 3297 2922 17733 15346 3263 1709 8310 2357 722 6521 8545 2365 2491 1823 953 16562 8274 22021 1752 586 2405 11870 20707 3849 22022 22023 594 14467 2924 4125 564 677
1088 10829 10824 11569 11878 15206 10823 13687 11876
1089 5527 11300 10839 13763 10174 10184 10911 10837 11284 11230 11290 13078 10291 20769 10787 5501 10150 19453 19448 11234 10223 5448 16455 14943 5486 5458 10755 10159 5298 10125 10735 13765 5551 10091 18779 5457 5536 5481 10551 12452
1090 22024 22025 3806 22026 14071 22027 18307 13649 22028 5851 2337 642 22029 22030 978 722 1537 18807 5928 5939 11592 18898 1853 1852 1851 571 1933
1091 22031 3722 3726 3723 22032 3724 22033 22034 10689 160 5807 5812 22035 22036 7685 3456 1623 9306 15469 2533 22037 20523 22038 828 22039 837 5809 5808 5810 9907 20963 22040 14294 22041 8932 22042
1092 17407 17672 12028 4733 128 1287 333 1206 22043 160 1679 22044 4569 6375 22045 5777 9944 22046
1093 1732 1941 1930 1067 22047 11771 14511 17514 991 11092 11101 1717 632 12332 2055 7457 19619 9299 14734 22048 6193 22049 2364 3192 2372 17513 16622 917 469 12709 11767 673 969 12875 1755 18527 9342 3937 820 1029 744 12682 1751 11094 11915 22050 1962 11657 7937 2961 2938 3916 2530 3312 4024 3920 3970 14696 3875 10040 22051 22052 4057 6868 1745 6843 728 3965 10037 884 18690 12725 12992 1750 17943 12576 2922 821 20229 7621 12050 3352 878 15239 9344 2406 875 7938 3297 17730 837 16412 12798 3455 828
1094 160 18614 8975 6226 1138 2577 2477 1674 14840 12099 1293 9109 22053 9702 1160 15500 15498 1298 1296 8256 2425 1805 1195 9042 9037 9039 2588 9041 1692 8993 8876 2564 2539 3777 1251 2632 18261 1649 22054 19814 1242 15528 21048 2605 8214 15438 21047 1184 1222 22055 22056 22057 4596 4469 11035 8182 6106 6439 6234 11033 6232 1175 185 6153 2498 22058 2437 22059 7412 22060 7413 2416 11177 1227 5610 1625 11151 3703 1239 1249 2550 18243 8234 16167 3790 6165 6166 6167 19624 6168 3681 22061 22062 2457 22063 22064 3685 6892 8952 1157 1261 22065 3671 3676 2422 8281 2470 7106 5653 20269 1133 3749 5627 22066 8935 1183 3631 8934 22067 6881 22068 3747 22069 22070 8228 21193 9694 1181 8223 22071 2626 1253 2586 5657 1161 3684 8218 2585 1326 22072 20958 2455 2579 1232 1413 2581 1193 2628 11111 1144 1194 5675 219 22073 6235 8874 5706 1702 2642 6089 6090 11387 22074 5678 11734 3456 1182 6209 8224 22075 3704 6243 1302 2514 3700 7377 19620 6196 3500 5695 4369 8285 12933 3716 3719 15362 6327 8950 13081 4635 1327 15542 9933 1331 1332 2616 22076 1393 22077 7093 8173 22078 22079 15443 18271 22080 22081 7113 2602 5674 1150 2481 22082 2613 18319 22083 19330 8230 8232 8231 2494 8233 1292 22084 2423 6102 8216 18193 22085 3690 8260 19626 22086 18921 22087 6542 2222 22088 14662 8266 2220 1025 1023 15168 1021 22089 11613 22090 1017 21688 22091 12525 22092 9995 3563 22093 22094 3574 3689 3674 1623 5692 15385 1259 10978 1632 1289 1260 8226 5696 8888 6244 9108 2578 6214 2421 3683 22095 22096 1188 2204 2223 1218 1176 1163 2426 1233 1199 22097 22098 5611 15381 18196 1191 8871 1240 1135 8958 1228 1318 2521 2181 2471 1635 21030 1179 19611 2607 1109 22099 22100 22101 1168 22102 19874 4239 22103 22104 22105 22106 19930 19929 15524 22107 19931 22108 22109 22110 22111 22112 22027 22113 22114
1095 20686 20712 22115 20749 20715 22116 22117 21707 22118 22119 22120 22121
1096 21321 20712 22122 22123 22124 22125 20683 22126 22115 22116 22127 20692 22128 22129 22130 21574 21161 21705 22131 22132 22133 22134
1097 22135 22136 22137 21548 21117 22138 22139 22140 22141 22142 22143 22144 22145 22146 21596 22147
1098 22148 21619 22149 22150 22151 22152 22153 22154 22155 22156 22157 22158 22159 22160 22161 22162 21584 22163 22164 21335 21367 22165 22166 21341 21355 22167 21348 19881 22168 8203 1165 21704 22169 21324 21703 22170 22171 22172 22173 22174 20755 21365 22175 21336 21590 22176 22177 22178 21358 21329 21339 21360 22179 21340 21588 22180 22181 22182 22183 22184 22185 21586 22186 22187 22188 22189 22190 21600 22191 22192 21620 22193 21583 21538 22194 22195 22196 22197 22198 22199 22200 21635 22201 21612 22202 22203 20746 22204 22205 22206 22207 22208 22209 22210 21630 22211 21361 22212 21691 22213 21548 21351 22214 22138 22215
1099 22190 22148 22209 22216 21122 22217 21613 22161 21593 22163 22218 22219 22220 22221
1100 10152 10155 10150 10151 10551 11278 10128 10923 5457 10102 10903 11264 11269 5486 5487
1101 10650 10649 15802 8908 8909 22222 16706 15848 19760 17638 8945 8116 15447 8936 22223 4692 8133 3591 15794 15792 43 22224
1102 22225 12043 12035 12946 12045 16947 7625 6039 6070 1609 2971 6995 12071 22226 9656 3192 283 22227 22228 21665 13663 22229 12059 22230 22231 22232 7855 22233 16953 17979 17962 17981 11860 17958 17975 18040 22234 19642 4891 4895 22235 4897 7624 16975 11861 16952
1103 14655 718 22236 22237 155 11870 141 2976 1609 22238 3251 2925 1881 1974 13194 4099 1771
1104 15856 17612 10652 10656 8924 15702 8902 16690 17624 10660 21 37 15775 4683 22222 16701 11669 17616 20951 16700 22239 10649 4698 13 22240 13019 10635 10661 3601 15835 13850 4699 17638 8134 22241 10647 15805 8115 10644 16694 10666 16692 8940 15 7998 13852 13002 8133 22242 18959 10633 13734 15445 13853 22243 17615 47 22244 22245 22246 16695 17628 13736 3598 10654 11 22247
1105 594 3884 22248 2491 3386 22249 12200 1076 14467 3885 1895 22250 1764 3980 2387 14466 18466 14597 11522 4035 11512 1755 715 22251 11480 4079 8252 2944 9714 14511 2388 4030 8472 7947 1829 1029 628 2927 22252
1106 17801 7760 11869 2525 22253 22254 8520 8423 2970
1107 22255 13102 13103 22256 18274 19389 21645 22257 11924 1551 22258 17430 18789 22259 11740 22260 11731 21646 20314 22261 18794 11741 18813 22262 11738 18793 21643 18812 18797 18810 19390 20315 11730 19396 19393 20502 21644 22263 18788 20506
1108 22264 22265 18514 10509 22266 22267 22268 9770 22269 10482 22110
1109 16974 15931 11860 17952 16809 1304 3154 22270 2440 3741 1253 5678 16471 22271 9489 1256 1352 16445 5893 22227 2437 22272 2432 3716 3668 4527 3525 9085 9508 15317 4533 2364 19610 6431 6212 1182 3684 3751 16456 4509 2486 1188 6226 15383 1248 1126 2180 2630 184 9564 1302 6101 3700 6196 6088 22273 22274 4550 22275 10819 6232 4502 15379 1237 14842 2504 3487 3715 1111 22276 1125 8334 15279 19350 22277 22278 8906 160 456 22279
1110 13802 2099 545 6131 4455 19833 3463 192 1433 1210 369 22280 4523 8185 1782 2905 22281 2093 22282 2189 8605 2263 3036 4570 6931 22283 18402 4579
1111 22015 19173 8348 5452 9832 4959 12446 22284 19283 3554 5268 11925 10053 18100 19192 7611 7404 22285 17706 22286 22287 22288 4981 5230 5223 11049 19674 11050 18060 10055 4940 22289 4944 4946 18102 9778 19018 22290 19169 22291 4985 22292 5224 22293 22294 5234 19220 3550 22295 11046 19675 13069 22296 4937 4950 10073 10064 22297 20445 18179 12447 22298 12019 4955 22299 22300 4964 4960 18080 18101 18103 17030 17192 22301 22302 22303 4956 19229 5077 22304 17499 18092 22305 11931 20417 11038 9831 19016 11037 16306 19185 22306 22307 22308 5250 5251 19191 19023 19199 22309 19182 18105 12440 11048 11052 11042 20420 5225 22310 3552 13300 5065 18061 18079 22311 4989 4983 11045 22312 19174
1112 21540 22313 21526 22314 21534 21166 20722 20725 22315 21130 21342 21523 21324 21579 21169 21149 20689 22316 8849 22317 22318 22319 22211 22320 22321 22322 21904 21905
1113 4225 8473 22323 1283 8456 6081 3585 6076 13480 12154 17378 22324 3414 14443 8334 8497 22325 12728 5685 22326 22327 8636 205 6813 17145 5172 545 192
1114 15201 10895 15539 13610 11492 10583 12438 8266
1115 1806 2541 5578 5297 3511 9153 1203 1455
1116 3400 16283 14674 22328 15909 16295 22329 14479 8905 22330 22331 7477 22332 22333 3520 22334 9281 6537 4429 9658 3405 5116 15727 9953 17321 17536 22335 17525
1117 8582 3098 5016 22336 1209 192 2893 8737 2327 8749 8748 19701 785 6650 5883 5652 5886 14817 5014 8751 8754 8753 8755 8579 1788 1424 1787 297 1320 2071 2259 1430 1571 296 3767 1586 12274 17053 22337 12555 2067 3101 7367 22338 13823 11365 3736 22339 3092 8828 6928 5682
1118 1252 1191 5679 1302 2563 2525 571 917 1937 1857 4036 1845 3925 1843 877 674 2572 3733 3740 5675 6245 7079 184 3750 2554 307 5389 1706 306 809 22340 6226 215 1631 1292 219 220 3702 1150 229 5671 3776 1307 223 4622 805 13154 5628 1199 1644 2541 179 16271 16260 16298 20135 22341 7464 21435 7631 141 3705 6100 2508 8221 1300 3701 2539 5670 6210 1632 447 3092 1613 8218 180 2495 2624 1553 529 1430 1321 2580 6111 1141 1260 1122 4509 22342 1636 1211 1134
1119 17492 4163 22343 12787 1538 1169 1170 22344 8220 22345 18306 22346 1079 13446 2393 22347 15110 158 19672 1466 14451 3196 3195 2972 7792 3419 9316 9318 12735 15652 8066 6029 8611
1120 1168 22348 19686 22349 283 22350 11652 12665 7445 7481 1649 1242 8870 3265 9764 5305 1808 181 5830 16471 7444 5829 9160 2224 10671 6285 10669 8205 22351 22352 5683 22353 22354 17234 19454 7681 4416 5465 4419 1811 160 1287 4658 22064 3743 3747 22355 2599 3541 129 8246 22356 22357 1806 21266 17754 22358 22359 22360 9568
1121 22361 21516 21126 22362 22363 22364 22365 22366 22367 22368 22369 21913 22370 22371 22372 22373 22374 22375 22376 22377 22378 22379 22380 22381 22382 22383 22384 21180 22385 22386 22387 22388 22389 22390 22391 22392 22393 22394 22395 22396 22397 22398 22399 22400 22401 22402 22403 21894 22404 22405 17405 22406 22407 22408 22409 22410 22411 21181 22412 22413
1122 22116 21166 22414 22415 21859 21126 22389 22416
1123 22417 22414 22418 22419 22420 22421 22422 22423 22424 22425 22426 22427 22428 22429 22365 22430 22431 22432 21912 22433 22434 21154 22435 22436 22437 12192 22438 22439 22440 22441 22442 22443 22444 22445 22446 22447 22448 22449 22450 22451 8856 22452 22453 22454 22455 22456 22457 21925 22458 22459 22460 22461 22462 22463 22464 22465 22466 22467 22468 22469 22470 22471 22472 22473 22474 22475 22476 17497 17579 22477 22478 22479 22480 22481 8846 21934 22482 22483 22484 22485 22486 22487 22488 22489 8947 3591 15854 13348 22490 22491 22492 22493 22494 22495 8845 22496 22497 22498 22499 22402 22410 22500 22501 22502 22503 22504 22505 22506 22507 22508 22509 10882 22510 22511 22512 22513 22514 22515 22516 22517 17405 22518 22519 22520 22521 22522 22523 22524 21694 22525 22526 22527 22528 22529 22530 21126 22364 21858 22531 22532 22533 22534 21917 21918 22535 22536 22537 22538 22539 22540 17345 14329 6081 1683 14323 22541 3810 1509 22542 5172 13482 22543 22361 22544 22545 22546 22547 22548 22549 22550 22551 8132 13021 13017 22552 21948 18702 22553 22554 22555 4236 12955 22556 22557 22558 22559 22560 12953 7934 22561 22413 12186 22562 22563 22564 22565 22566 22567 18982 22568 22569 22570 22571 22572 22573 22574 22575 22576 22577 22398 22578 22579 22580 22581 22582 8850 22583 22584 22585 22586 22587 22588 21919 22589 22590 22591 22592 22593 22594 22595 10879 17484 22596 22597 22598 22599 22600 21172 22601 22602 22603 22604 22605 22606 22607 22608 22609 22610 22611 22 22612 10656 3598 3597 48 16688 22613 8913 8920 16687 9 22614 22615 21695 22616 22617 22618 22619 22620 22621 22622 22623 22624 22625 22626 22627 21696 22628 22629 22630 22631 22632 22633 22634 22635 22636 22637 21913 22638 22639 9453 22640 22641 22642 21614 21352 22643 22644 22645 22646 22647 22648 22649 22650 22651 22409 22652 22653 22654 22655 22656 22657 22658 22659 22660 22661 22662 22663 22664 22665 22666 22667 22668 22669 22670 22366 22404 22671 22672 22673
1124 13016 15791 21511 15359 21501 21478 15788 21504
1125 6973 2971 3292 559 6372 2551 2895 2473 2484 2150 8584 8773 10323 13136 8594 17912 13912 2526 12283 10399 6559 10271 22674 5402 8059 11365 10227 22675 6942 8802
1126 3117 3116 7465 2971 2525 10031 22676 14472 3016 22677 2679 22678 2493 14557 14529 22679 18489 269 9321 991 1036
1127 22680 22681 22682 22683 22684 21372 22685 19006 22686 22687 17573 22688
1128 5809 8933 5808 5807 22689 5812 22690 5156 20928 22691 11663 4598 7976 7971 9389 22692 22693 22694 5445 3758 22695 5810
1129 1772 893 2964 3944 1042 1986 2491 21114 17925 22696 4006 601
1130 6979 22697 22698 13615 6415 19069 3022 14130 14131 22699 22700 3795 22701 51 14272 22702 12273 9385 18540 22703 9895 21305 6282 1236 19621 21038 10280 22704 12149 10799 8779 13923 18406 12286 13675 1811 642 2817 16040 17441 17825 5110 5104 7145 12733 2880 4554 12292 7484 12299 160 21048 2067 22705 22706 18645 9839 5211 10315 22707 13798 16498 9877 8579 8046 22708 2190 1428 22709 14139 9293 2249 22710 1835 3039 1594 5423 9930 22711 837 22712 11860 4895 4891 19643
1131 9458 12776 727 7760 17925 11840 4735 7478 3956 20127 22713 22714 1028 11507 14448 12831 1061 12856 12850 12889 15691 3862 4173 12887 9314 22715 13125 22716 4232 15338 9306
1132 22219 22717 21893 22718 10879 22719 22720 22721 12359 8849 21590 22722 22723 21147 22724 22725 22726 22727 22728 21592 5681 22729 22730 22731 8850 21905 22732 22733 22734 22735 22736 22737 13021 22738 21602 22739 22740 22741 22742 22743 21182 21158 17484 22744
1133 22745 19383 22746 718 2525 3322 20997 722 283 8773 9359 7016 9957 13783 13775 7056
1134 19146 17843 3125 13643 22054 978 274 4262 7431 266 268 11011 267 269 22747 265 12932 9421 15136 20203 2220 718 19822 3248 17837 7287 2821 17852 8110 10807 1264 22748 2662 17847 19816 16183 7125 13757 17822 22749 17829 1759 3972 10022 15723 642 11522 3941 461 18342 8305 4075 16940 2737 2760 2858
1135 3925 2935 1761 6677 6847 8128 12200 875 3533 12225 1839 3140 22750 10607 1726 9434 8139 159 2667 1976 16613 1760 2400 692 12597 4091 7722 642 13180 11796 978 3392 4172 22751 1857 8262 22752 590 7486 856 19305 6839 17927 2381 3264 19485 4344 147 1064 2283 3872 11523 2937 1851 2924 10601 7745 2943 20876 145 22753 2380 9298 15276 7961 2657 16575 14706
1136 21728 5332 18706 5329 16270 5333 5325 5331 7632 16321 16262 22754 22755 19081 22756 16264 13184 7631 16266 5466 3147 7696 16324 7670 15047 17767 17966 7651 16194 17532 17533 11078 22757 17534 7681 5465 4416 22758 5490 1811 6037 7465 3299 16273 22759 22760 17187 13885 8577 8576 7846 12205 2019 22761 22762 22763
1137 22764 16127 16136 22765 16717 16732 16721 16714 22766 22767 16718 22768 9916 16713 22769 22770 22771 8861 22772 22773 22774 22775 16719 9919 22776 22777 20816 22778 16729 22779 17875 22780
1138 10657 15852 15835 3601 8903 8115 17612 15794 8931 8133 4686 10666 4696
1139 931 19866 598 10020 921 12755 12571 951 18419 1055 1047 3322 2525 12771 15684 22781 21561 8452 12260 21974 22782 958
1140 20242 10926 10790 10920 2203 15540 10208 5189 10852 5214 10889 11816 10911 10549 21001 22783 13607 22784 21227
1141 8602 12557 8189 6372 9291 2474 13322 8792 22785 447 3768 559 2363 10491 503 4381 1168 9930 12319 12163 1553 369 11376 13141 7364 3098 5767 3784
1142 1761 2276 4183 4180 1740 13208 18699 2959 20611 3154 4817 4407 13254 22786 4883 13091 4878 22787 1839 17342 5429 1268 1504 17113 22788 1498 22789 17077 1503 2493 653 689 4218 13181 625 2937 3920 617 22790 22791 19227 1492 1491 3809 1500 5691 1502 12637 1463 1686 8560 19053 2675 3263 13452 14601 13179 2957 12644 8552 12616 8027 8543 821 2055 917 2671 22792 4882 937 13586 3329 12728 12260 2044 1042
1143 22793 17576 22794 17569 9920 22795 22796 22797 22798 22799 21287 22800 22801 7546 17572 17574 17577 22802 22803 22804 16437 9914 7550 8868 20541 22805 22806 17570 22807 10649 48 31 15449 50 7998 17641 8013 10626 10627 3598
1144 692 14634 632 9443 3849 4122 14603 12693 2281
1145 22808 19958 15524 4924 17816 19921 15518 12439 22809 19950 3806
1146 18743 192 1433 5886 785 775 805 3133 17066 18730 978 3214 19774 20078 20069 9390 16390 22810 3012 7846 22811 22812 22813 22814 22815 7983 20181 22816 22817 22279 22818 4422 9650 1466 8614 20070 20521 22819 19989 22820 2660 9391 20172 20073 21271 22821 22822 20081 11742 20067 22823 4599 17187 2570 559
1147 22824 22719 22825 21523 12192 22826 22827 22430 22828 22829 22830 22831 22832 21577 22833 22670 22834 22835 22836 22837 22838 22839 22631 22609 22840 22841 20727 20721 21700 21151 22171 22842 22211 22194
1148 22843 22844 21452 22845 11585 13725 13731 22846 21467 21819 22847 22848 21074
1149 10742 5536 18870 10216 22849 10090 2203 3288 3261
1150 9271 3122 4171 893 16550 2957 22850 18412 642 19145 13951 2824 632 4039 9420 19621 22851 1083 4480 6679 3313 6678 3120 3297
1151 18942 22852 16019 22853 20111 9280 19318 7031 22854 17324
1152 10215 5461 10792 11823 20783 18229 20401 5538 11450 11256 15197 10923 13766 11233 10201 10848 18779 11266 19450 22855 10735 22856 5536 1330 17556 5561 6753 1207 11269 10899 11434 5449 5470 21108 10122 17232 1811 4743 4794 20110 4867 22857
1153 8391 8497 160 1242 8870 17754 253 12480 12474 12639 22858
1154 2337 5512 829 22859 20870 3313 3823 4346
1155 7209 15931 7856 12022 19643 16952 17983 17961 7625
1156 12452 18424 11409 11234 21213 11300 9745 22860 15044 9771 9756 9761 10551 10937 10204 13941 5441 5486 10095 20770 10175 11247 10583 20676 11812 10106 11435 10161 5474 5473 20769 5481 5541 21042 22856 10886 10215 5499 10742 22861 22862 22863 22864 11412 15551 15199 10899 10192 10284 11390 20778 18229 18871 13651 10112 15550 10900 10904 7927 4418 19158 13766 10575 10128 10121 10101 433 5553 5547 10919 11230 11237 5488 11826 18826 5450 11259 10722 10787 10090 11433 13765 11666 10162 11400 5551 22865 10892 5530 19450 20777 1811 7669 9786 7728 13764 5487 5475 10120 21215 11245 10923
1157 148 150 151 1849 3928 3363 6516 1847 1845 1857 3927 3924 3923 16614 1850 1851 1852
1158 22866 13992 1004 9908 22867 16895 18025 7993 1811 1538 6033 274 18139 18135 12627 1500
1159 7649 1067 13237 19737 19311 14032 14031 17590 22868 13848 20147 17701 21685 22869 21424 2332 13847 22870 12031 15235 22871 12922 5604 19303 17261 2337 2372 4812 7875 17685 7643 7865 4751 12465 14001 3607 12120 16878 3617 3618 7873 7644 22872
1160 22873 22874 17405 22875 22459 22876 21904 22877 22878 22879 22880 22881 10883 22882 22883 22884 22885 22886 22887 22888 22889 21536 22890 22891 22892 22893 22894 22895 22896 22539 22547 22897 22898 22899 22900 22901 22376 22902 21917 22903 22904 22905 22657 21912 22362 22906 22907 22908 22909 22910 22911 22912 22913 22914 22915 22916 21933 22917 21516 22918 22632 22919 22920 22921 22922 22923 22924 22925 22926 22927 22928 22929 22930 22931 22932 22933 22934 22935 22936 22937 22938 22457 22939 22940 22941 22942 22943 22944 22945 22946 22947 22374 22948 22949 22950 22951 22952 22953 22954 22955 22956 22957 22958 22831 22584 22372 22959 22546 21694 22839 22960 22370 22961 22962 22963 22964 22965 22656 22966 22967 22968 22969 22970 22971 22972 22973 22626 22421 22974 22975 22976 22977 22978 22979 22980 22981 22982 22983 22984 22985 10882 22986 22526 22987 22988 22989 22990 22991 22992 22993 22994 22615 21913 22995 22380 22996 22997 22998 22999 23000 23001 23002 23003 23004 21695 23005 23006 23007 23008 23009 23010 23011 23012 22509 23013 23014 23015 23016 23017 23018 23019 23020 22530 23021 23022 23023 23024 21909 23025 23026 23027 22450 23028
1161 20718 22121 23029 21151 21867 21546 21122 23030 23031 23032 22128 21540 23033
1162 20692 22129 22413 23034 22380 22878 21536 21124 21169 23035 22490 22657 23036 23037 22627 23038 21934 23039 22644 21948
1163 9914 20822 20807 23040 20539 19657 23041 17579
1164 16902 19175 5269 13589 19254 9779 23042 11847 19673 20452 6383 6592 531 9619 2270 7368 19065 10350 540 6799 3304 23043 4939 4964 4959 16825 21062 5685 3327 4995 1496 8402 253 1503 17077 17216 23044 1463 1537 19170 11052 3551 18078 10054 19220 7919 141 21436 16329 16257 5094 10066 20416 5032 5030 18081 19262 19260 16302 20431 19182 13932 19217 23045 4943 18084 19251 22299 23046 4983 19221 14589 3261 18429 14746 19533 15670 15405 18452 23047 23048 16306 18092 19223 23049 23050 15598 4950 19023 19181 18180 16300 11931 16301 9778 16303 12013 4946 12399 10065 20449 23051 11997 8364 20472 19192 19193 19256 23052 19173 23053 23054 13609 23055 5440 5344 19179 23056 9832 23057 11920 11930 11923 23058 23059 15999 5253 23060 12014 23061 4930 10053 18099 19229 6994 13290 6993 16006 22311 18061 22302 22301 3547 5244 5079 19675 20447 11045 3549 17030 22310 9127 11046 19674 16000 11042 22291 5246 23062 23063 18449 9808 11038 23064 18077 23065 4989 23066 23067 18859 19234 6363 4952 20458 9776 15263 19200 20469 19169 20459 18464 4938 19201 19204 19190 23068 19184 18458 4987 22292 13066 10081 23069 12400 23070 10821 19019 23071 6364 4951 4955 22300 23072 19189 19225 12440 10082 23073 16307 10830 6999 19080 15473 5773 2253 21015 2146 5881 765 9830 20035 1791 2472 1617 3030 16997 559 19183 23074 593 3946 2276 571 10442 14723 1712 4133 1893 4129 744 1939 1933 1714 2525 16886 155 19195 23075 23076 23077 19018 7610 23078 5452 23079 19707 17031 23080 23081 20424 19207 20432 23082 20455 19265 9831 3552 20456 19235 18106 11933
1165 998 14407 13697 11570 3012 10694 864 1856 14600 12597 23083 12710 7936 3373 4121 12334 1755 11534 2396 1941 745 11771 20205 747 13840 1852 20057 14733 11107 20866 4173 4159 744 565 23084 3823 9342 877 3244 3380 23085 3191 23086 4253 7309 23087 4256 12932 4990 23088 12438 11101 571 2964 3328 17730 470 13166
1166 21348 21590 23089 23090 21345 23091 21115 20730 23092 23093 22191 23094 23095 22486 23096 23097 21948 20727 23098 23099 20680 21338 21178 23100 20734 23101 23102 23103 22195 23104 23105 23106 23107 9597 23108 20689 21160 22153 23109 21577 23110 23111 21556 23112 23113 20681 23114 23115 23116
1167 20735 21115 22547 23117 20727 22131 21150 23118 18702 23119 20725 21324 22490 23120 23121
1168 15715 23122 1014 23123 15453 15454 3572 16050 3571 3569 2656 5281 18498 1019 17072 16991 3581 23124 10320 23125 10005 23126 5282 5283 9998 1022 16831 9991 9871 5271 10321 5272 23127 15144 23128 23129 10004 5273 14432 23130 11622 13275 4294 981 23131 23132 23133 23134 22810 22231 6922 12072 12046 12025 23135 16330 11839 12043 16946 13247 12101 14741 22230 23136 23137 23138 23139 13557 22712 23140 12034 7468 23141 23142 12100 800 13212 6378 6392
1169 8151 3377 15475 19290 697 3925 3922 12936 11517 21236 744 991 23143 16348 6478 17928 15130 3982 4018 12564 1863 3197 1933 3349 11541 12990 7940 16025 463 3199 12722 1965 461 475 8274 11532 23144 1906 14466 23145 14774 15007 23146 3198 3202 16242 155 15391 2662 11657 8956 11140 628 6525 12700 8275 605 23147 13843 1723
1170 10656 4683 3604 31 23148 13021 13 8913 8906 14395 4684 15860 8115 23149 8117 10624 8928 3600 18619 23150 8912 10626 11672 22224 23151 15449 23152
1171 22964 22562 22376 22941 23153 23154 21924 23155 23009 22919 23156 23157
1172 13647 23158 7845 2673 7665 23159 23160 4598 23161 9163 23162 23163 11854 4194 23164 980 22018 16110 16111 23165 2662 23166 4294 1811
1173 23167 19107 19100 23168 23169 23170 21326 23171 23172 17497 23173 23174 19113 17498 17575 23175 9920 21369 19007 23176 23177 23178 19117
1174 23179 23180 22644 10883 23181 12190 21934 23005 23182 23183 22575 22562 21516 22951 23184 23185 23186 23187 21181 21907 23188 21856 22524 23189 12186 23190 23191 23192 21933 23193 22438 22473 21904 21536 23194 23195 22898 23196 23197 23198 21948 23199 23200 23201 22389 22364 23202 23203 23204 23205 23206 23207 23208 23209 23210 23211 23212 22652 23213 23214 23215 22669 23216 23217 22592 23027 23218 22471 23219 23220 22522 23221 23222 23223 22719 23224 17573 8906 21313 21497 15789 23016 23225 23226 23227 23228 23229 22917 23230 21180 23231 23232 23233 22387 23234 23235
1175 14337 283 23236 20066 13594 8575 8573 5569
1176 4680 17637 8119 10650 31 13021 18621 23237 23238 15798
1177 1139 2502 1114 23239 11242 15946 10753 1698 1808 1452 1292 2501 3777 447 1441 11147 4843 6029 6355 1810 5678 7095 229 2463 11308 20972 2624 23240 4535 1407 1302 18321 5662 23241 2457 23242 23243 7376 6157 18320 1679 18935 18974 7097 14933 5629 1809 6165 2448 2599 1307 15982
1178 917 7339 13376 15008 23244 23245 15010 10805 5546 14311 3261 2635 19549 674 673 13583 12214 23246 878 23247 12444 5601 7843 3192 23248 1609 6657 12779 16630
1179 7548 23249 8868 8847 19652 7546 8848 23250 21287 20823 7547 192 3467
1180 23251 6188 23252 11857 141 827 21237 15344 15753 19408 15317 22049 23253 7664 7573 7572 7592 13353 23254 19446 15316 6193 6191 8200 23255 18704 23256 23257 7631 16265 23258 23259 23260 23261 21438 15315 5344 5343 5452 19707 5079 23262 5440 19022 5030 23263 15262 5226 18458 4946 4964 3549 3551 22311 18463 17499 13069 2971 2364 20474 23264 20165 17811 11835 7658 23265 17501 23266 19413
1181 23168 23267 6983 19117 19121 17580 17496 19656
1182 21266 21265 17754 8266 2971 721 5237 18086 18093 11723 21267 2709 5104 2740 3504 2773 2872 2659 2753 2748 2843 7287 18482 2876 642 722 3212
1183 12980 23268 2412 3264 4003 1906 18355 1077 6478 4705 13452 12768 19470 11528 18532 3381 23269 4002 3240 6751 2286 1938 475 991 3829 15641 20835 1156 6197 18528 3939 1719 14709 8099 723 12517 5142 2379 18898 23270
1184 12632 17159 1463 23271 251 17428 12499 4995 17348 23272 23273 18470 4326 8433 6081 14329 4327 23274 5542 1546
1185 23275 23276 18860 23277 23278 15650 10429 15651 14673 991 13844 7750 23279 23280 23281 14854 23282 16012 15480 10426 15118 870 729 23283 7748 14850 16761 10454 23284 21249 14849 3613 7470 14859 16246 20434 2341 23285 15133 17886 11587 2525
1186 11482 4129 8253 2961 11757 882 3843 10035 13420 870 4122 13186 1759 1937 3359 1732 16606 14614 3377 1726 13205 18214 1753 1724 4012 4016 11534 602 5137 4102 23286 4079 11476 6520 3386 879 652 14731 991 5059 877 3947 3974 2680 3365 14698 2959 16550 3846 3898 554 2967 1764 9447 2934 1755
1187 1683 8396 23287 4994 722 978 11061 8411 17107 5429 17308 8444 1680 9468 6084 8033 23288 17378 3409 23289
1188 6037 15318 11974 5022 7455 3152 7404 23290 19780
1189 13768 6336 6324 6270 6282 22354 17752 17746 21265 22353 17747 11813 23291 22862 17234 20399 4396 4371 19592 456 4662 11891 15440 160 19423 1541 11244 11201 11198 11397 19752 23292 11410 10142 5538 10143 13656 17754 9531 5452 5228 17191 5030
1190 17405 22879 23293 21145 23294 21858 23154 22466 21126 21516 22921 23214 8845 23295 21695 23296 22632 10880 23297 23298 23299 23300 23301 21909 22878 21172 23302 23303 21903 23304 21573 21154 23305 23306 22929 23307 22413 23308 23309 23310 22364 23311 10879 22719
1191 1500 12484 5370 12478 17278 12482 5177 10953 1509 11837 1277 1502 1506 17352 23312 23313 7021 141 2363 1352 2364 8537 15235 19309 23314 9964 7987 3230 3616 3611 20190 23315 19728 15328 8542 11880 10083 23316 8348 13070 22298 718 23126 13274 21675 13299 13298 3563 17211 18130 12525 15159 23317 1022 23318 1023 14424 23319 23320 3001 23321 23322 12841 920 14793 14453 21962 3824 2525 6533 6534 2692 5110 23323 5100 2773 2971 23324 575 3191 23325 21963 4858 4908 11795 23326 14789 2334 12031 12470 7066 23327 23328 7059 7457 8539 2330 18396 23329 19476 13226 13253 23330 21403 18397 2335 15326 21399 4911 2337 4436 23331 23332 14737 19280 23333 23334 23335 14701 23336 3196 3195 3264 3396 23337 4003 6751 4782 468 571
1192 10704 9981 23338 10091 18911 10922 10840 10215 11408 10134
1193 23154 21856 22879 23294 21858 23339 23299 23300 23340 23341 23302 23342 23343 23344 22723 23304 21573 23345 21154 23305 23297 23346 23347 23348 23349 9588 23350 23351 23352 21536 23115 23353 23354 9590 23355 23356 23357 23358 23359 23360
1194 9108 1151 1302 1235 2199 482 1399 347 3704 1325 3456 5628 6225 1352 10335 23361 6088 2439 8045 9116 8993 1307 517 161 10508 23362 23363 23364 10497 6696 15978 23365 162 5359 10488 500 10486 501 10476 9770 502 14877 23366 5599 12602 495 14873 496 10525 10482 14881 10504 10483 10492 10491 10487 5360 12600 10475 10473 14872 10481 23367 503 10480 14871 23368 491 904 10512 901 165 522 484 516 18539 23369 23370 23371 23372 498 499 23373
1195 21382 23374 23375 23376 8712 23377 8175 8724 21385 23378 23379 6787 8702 23380 19534 19535
1196 603 4218 7933 1079 17921 1837 7486 1729 1755 11869 4118 605 16556 12983 15636 17931 991 9927 15476 920 3139 15665 3857 4002 15658 1867 1881 3384 23381 14672 1875 23382 4006 9432 1708 7758 6694 3378
1197 21953 22157 22148 23383 21130 20722 21620 21349 23384 23385 23386 23387 21144 23388 23389 22204 22156 23390 23391 23392 23393 22219 20688 20718 21178 21120 21169 23394 23395 21581 23396 23397 23015 17406 21138 23398 8849 22160 23120 20735 23399
1198 7548 23400 23401 8847 23402 23403 23404 23405 23406
1199 22148 21590 22188 23386 20712 17484 23407 2647 1504 1515 5429 1509
1200 8115 12401 15355 23408 4684 8012 13016 16706 15452 18818 17038 14529 8906 15814 8133 8008 8134
1201 23409 23410 1933 7490 6507 11129 926 9296 12779 728 542 1061 9988 9312 23411 7721 8527 849 12916 5586 8532 850 23412 17715 12031 23413 15235 5494 13969 20145 23414
1202 23415 9920 3272 718 954 12353 20215 3270 10082 5233 2971 8542 23416 7987 978 20587 2940 13810 2373 20121 23417 4743 14349 2337 3541 15969 9046 160 9163 10856 2637 20607 2525 8095 13038 20590 3154
1203 15317 19446 2363 21665 22059 7413 7412 2439 2434 7463 5893 2435 23418 17707 4675 21659 2432 1352 2364 20474 23254 6189
1204 8152 1948 11551 2981 8307 2525 1824 15497
1205 17503 23419 14432 1018 14430 22090 23420 9998 19361 15164 15168 23421 718 3569 18509 3581 13295 5278 14419 15162 12506 15155 13294 20200 23422 23423 5275 23424 18508 16052 5277 2656 23425 5271 23426 21671 23130 5272 9793 23427 10004 14824 9994 23428 15144 13299 1017 23429 11613 23128 21679 23430 9995 11720 1015 2652 2650 2653 2655 16046 2651 2654 7338 1021 14416
1206 23431 23432 5850 19297 18790 13649 12037 23433 23434 23435
1207 23436 15542 3746 1215 7583 5962 13614 23437 7972 1126 8230 23438 23439 20802 1248 1292 8952 23440 23441 11648 23442 23443 9885 23444 19572 23445 23446 11652 1306 4847 23447 14687 5570 23448 8238 15224 23449 7974 8018 281 5211 4422 4415
1208 1236 8302 3875 992 2929 1724 3386 590 2970 7760 11869 655 3826 3938 628 3852 3825 154 541 21205 20771 13942 1284 3810 8393 1493 3800 17201 1500 1537 283 5538 19452 10168 20781 10105 11268 5213 11450 23450 11257 16403 10559 20772 6753 23451 11240 10702 13611 13084 10553 10841 9240 23452 10855 10840 10527 17410 10547 10575 18670 160 21046 1934 3945 1729 12536 712 1933 1930 18005 673 17683 3933 2396 2525 2203 10144 10167 10917 5560 5469 5500 13057 10205 21210 21208 11403 10843 13610 11401 10785 11409 13098 2200 10133 10844 10787 9975 16402 11238 11426 10134 19755
1209 23453 23454 20495 13959 23455 13719 23456 23457 19916 23458 23459 19883 23460 15520
1210 2392 1938 13516 593 11482 1752 23461 1933 2397 23462 18892 2412 3234 2379 881 990 11474 3251 12937 23463 1712 1714 4776 11531 23464 872 1352 10787 2363 2364 2365 4775 7810 22226 23465 10735 5527 11241 17557 5486 13059 5575 5576 545 539 2319 1437 1436 2467 2889 1443 1423 9743 5772 6203 1320 8760 1792 195 2898 5647 9740 1778 4526 775 805 779 13949 201 202 4607 1783 6609 5006 1780 1448 17002 3465 3266 5646 13754 6448 1424 369 804 9780 792 2078 192 18158 196 761 16512 23466 6833 786 2058 3137 559 6144 7461 23467 3192 837 16455 5459 9978 11260 21217 5458 6111 11236 11318 11417 15199 10126 23468 16394 19449 18229 11390 5470 11430 5560 19450 11247 17549 17552 11248 5530 20402 5554 10551 22865 20778 10900 23469 10130 10164 5485 11232 10122 13644 11432 23470 16088 20486 23471 23472 2971 8266 13656 10125 5557 5541 5532 11277 21211 18909 2203 10547 10908 11237 5474
1211 8647 17904 141 10307 190 11353 369 9375 18570 11161 7363 23473 14169 17012 2885 6423 16171 23474 6942 18754 8803 18551 19344 2464 2252 23475 1222 6392 10278 9619 3268 4583 1555 23476 2246 23477 22273 10301 10303 1594 18546 8052 17901 10317 13308 9948 18659 15419 19986 5015 6933 8612 21200 8053 14184 10279 18540 805 546 16500 8600 4648 23478 8643 18650 2160 8614 14229 8894 17707 5667 2434 19080 6142 3764 4610 23479 3040 3303 3302 21668 8792 11379 23480 9939 331 23481 2067 23482 18759 9938 23483 14273 4646 6372 23484 2308 14243 3522 16518 14145 9348 5641 14250 14129 16491 16492 23485 18545 7356 13628 22698 23486 10308 12326 23487 8328 6860 4289 10331 575 23488 20566 6259 6269 7100 2222 15066 23489 23490 10323 3047 14298 14166 2325 23491 18663 12279 2097 5769 10306 4572 10280 23492 10316 12311 330 5383 12302 23493 12282 302 1445 316 23494 8674 17007 14777 23495 6637 14206 4571 12271 4582 13788 2323 9395 10309 12320 9861 18547 6634 16994 8802
1212 5615 7983 17066 2673 3092 8612 529 311 4498 5006 801 408 8637 12325 14208 9348 9293 14229 11142 10471 7363 11126 3103 8684 412 18727 1674 9044 296 8894 8805 19988 16749 1570 12174 23496 23497 8593 12177 5423
1213 22879 23498 23499 23500 22364 23214 22919 22535 23501 23502 22593 23503 23504 23505 20395 21145 22574 23506 22381 23193 23185 23507 23508 22623 23509 22372 23510 23511 23512 23513 23514 23515 23516 23517 23518 23519 23520 23521 23200 22524 23216 23522 23523 23524 22562 23525 23526 23527 22522 22719 22397 21695 23301 23192 23179 22592 23528 23529 23530 22966 21154 23531 22502 23532 22669 23533 23534 23535 23536 23537 23538 23539 23540 22639 23541 23542 23543 23544
1214 13096 17028 17029 6415 16499 553 11354 15521 2974 6670 6672 6669
1215 642 15558 23545 10140 6753 2203 1811 5110 2731 23546 12613 2662
1216 12694 11482 564 699 12911 13469 16574 2337 2283 7488 1993 1761 13444 14800 2916 1032 4030 2662 692 821 3121 650 637 10242 4522 189 192 792 8767 10403 2362 2676 2405 598 2533 3322 2492
1217 23547 842 23548 6675 2635 3962 4027 4480 2664 18558 4792 3618 4829 12112 4728 4827 4785
1218 11582 21086 11589 9455 18939 23549 2220 15485 19621 20164 21077 21818 23550 23551 13727 11578 23552 23553 22846 23554 12930 21074 21463 21100 21832 3345 21767 13724 21094 3336 21083 6664 14670 12342 1714 1933 1938 838 23555 1658 1657 1659 11594 21798 21101 3341 21105 22847 23556 23557 11598 21777 11600 2662 22286 22287 22020 21107 11576 11599 23558 13723 21450 21097 23559 21073 21099 21106 23560 23561 23562 23563 23564 23565 5728 21451 21461 11603 15065 18285 23566 1650 2525 2369 2365 953
1219 18248 23567 2823 2813 7183 13544 17768 14369 2717 3126 14381 2857 19858 640 23568 14347 7280 7229 23569 19808 12894 1878 23570 16758 5550 23571 19855 2708 23572 2801 17830 23573 2820 7164 17819 2729 23574 17784 7247 19558 18431 5080 23575 7301 2819 5097 23576 23577 23578 17789 17786 19801 23579 7186 17451 23580 5102 7130 2805 2849 16773 2737 17792 7257 2775 23581
1220 13732 21104 22847 21836 11575 11599 23582 12931 21812 11598 23583 3337 21106 21798 23584 21105 1650 21805 23585 23560 13727 16232 3339 23586 21762 23587 11576 2525 1811 4416 13724 11593
1221 23236 15673 3271 1541 1242 6107 23588 19011 21273 7417 23589 13888 14333 13592 14335 7416 17186 9620 7982 7981 23590
1222 16219 1537 1538 2203 5451 13943 5528 19451 10950 5457 15198 1330 10912 5536 5447 2081 1784 13949 195 10735 23591 11435 5561
1223 23592 23593 21881 13444 2396 468 155 14315
1224 494 14880 5599 493 504 9770 10480 521 491
1225 14409 5857 23376 8095 23594 14410 10815 17590 2337 18384 5878 23595 5666 2436 2439 545 1788 17568 2120 189 3138 812 8189 1428 176 792 3267 2887 369 192 3465 23596 2819 17855 2695 23597 6820 23598 11458 11565 23599 13097 10817 11457 11912 9899 14411 13926 18715 13648 11887 13922 13687 11569 10822 23600 1014 5142 1685 17161 23601 14404 13093 10823 9901 9900 23602 14399 11567 2312 10816 10824 978 4523 2319 205 805 208 559 6423 9898 8431 3820 17284 722 14407 1538 1023 9436 12496 9871 10322 6985 15145 15147 11719
1226 3229 19748 23603 18773 8341 3192 7473 23276 16246 1551 16825 1283 12154 8455 15136 13384 14913 17339 1513 17834 5143 8404 1823 5136
1227 23604 22314 23605 21342 22138 21130 21322 21546 20732 23606 23607 23030 20722 20742 22134 23608 23609 23610 23611 20752 20734 23612 21132 22841 22126 23613 23614 23615 23616 23617 21577 23618 21635
1228 14548 14560 17020 14567 14544 15395 14534 14532 14564 14538 14585 14579 23619 14571 14574 14551 23620
1229 125 7503 10982 7583 23621 107 7595 7526 23622 11021 104 113 21642
1230 12292 23623 23624 7148 17440 2525 19353 19354 14415
1231 5978 7536 17339 3586 12079 6006 7500 4207 16073 23625 78 5986
1232 23626 23627 7323 1538 18719 23628 240 7321 7422 19720 19461 4210 18023 7423 6834 7775 23629 23630 23086 23631 3065 23632 20097 23633 23634 5439 4263 4262 4336 268 269 10813 23635 18766 7420 4268 265 23636 4267 7427 7320 9577 5438 7306 3064 5340 23637 259 13000 23638 2543 7310 4249 23639 23640 23087 4253 4246
1233 23641 22148 12369 18993 13272 23642 22941 22440 23643 21948 22187 23644 22159 23645 23646 23647 22197 23648 16141 22192 23649 23650 23651 23652 23653 13267 23654 4198 13263 23655 23656 13268 20998 23657 23658 21287 7546 23407 6983 23659 23660 23661 23662 23663 22835
1234 21324 21546 20742 20755 21536 21154 23664 23665 21920 22650 23666 23606 21150 20688 23667 23668
[truncated: 4,233,595 more chars]
