# Supplementary material for: Research on Recommendation Algorithm of Joint Light Graph Convolution Network and DropEdge
Source: Hindawi journal article supplement (doi:10.1155/2022/3843021), 2022-01-27
Supplement: f1 [file 3843021.f1.zip › 3843021.f1/run-amazon_book.txt]

model：  lgn  layer：3  5月30日 21：46：21--6月1日 8：18：40  耗时：34：32：19 
D:\ProgramFiles\Anaconda3\envs\image_caption_python36\python.exe D:/workspace/LightGcn/LightGCN-PyTorch-master/code/main.py
Cpp extension not loaded
>>SEED: 2020
loading [../data/amazon-book]
2380730 interactions for training
603382 interactions for testing
amazon-book Sparsity : 0.0006188476640083725
amazon-book is ready to go
===========config================
{'A_n_fold': 100,
 'A_split': False,
 'bigdata': False,
 'bpr_batch_size': 2048,
 'decay': 0.0001,
 'dropout': 0,
 'keep_prob': 0.6,
 'latent_dim_rec': 64,
 'lightGCN_n_layers': 3,
 'lr': 0.001,
 'multicore': 0,
 'pretrain': 0,
 'test_u_batch_size': 100}
cores for test: 6
comment: lgn
tensorboard: 1
LOAD: 0
Weight path: ./checkpoints
Test Topks: [20]
using bpr loss
===========end===================
use NORMAL distribution initilizer
loading adjacency matrix
successfully loaded...
don't split the matrix
lgn is already to go(dropout:0)
load and save to /home/qhc/下载/LightGCN-PyTorch-master\code\checkpoints\lgn-amazon-book-3-64.pth.tar
[TEST]
{'precision': array([0.00012062]), 'recall': array([0.00022214]), 'ndcg': array([0.00018017])}
EPOCH[1/1000] loss0.439-|Sample:14.44|
EPOCH[2/1000] loss0.221-|Sample:18.26|
EPOCH[3/1000] loss0.181-|Sample:16.65|
EPOCH[4/1000] loss0.157-|Sample:16.76|
EPOCH[5/1000] loss0.139-|Sample:14.48|
EPOCH[6/1000] loss0.125-|Sample:14.86|
EPOCH[7/1000] loss0.116-|Sample:15.28|
EPOCH[8/1000] loss0.107-|Sample:14.70|
EPOCH[9/1000] loss0.100-|Sample:14.37|
EPOCH[10/1000] loss0.095-|Sample:14.32|
[TEST]
{'precision': array([0.01030051]), 'recall': array([0.02401627]), 'ndcg': array([0.01861473])}
EPOCH[11/1000] loss0.090-|Sample:14.51|
EPOCH[12/1000] loss0.085-|Sample:13.97|
EPOCH[13/1000] loss0.081-|Sample:14.50|
EPOCH[14/1000] loss0.078-|Sample:14.54|
EPOCH[15/1000] loss0.075-|Sample:14.45|
EPOCH[16/1000] loss0.072-|Sample:14.32|
EPOCH[17/1000] loss0.069-|Sample:14.61|
EPOCH[18/1000] loss0.067-|Sample:14.20|
EPOCH[19/1000] loss0.064-|Sample:14.23|
EPOCH[20/1000] loss0.062-|Sample:14.34|
[TEST]
{'precision': array([0.01182873]), 'recall': array([0.02776402]), 'ndcg': array([0.02160207])}
EPOCH[21/1000] loss0.060-|Sample:14.09|
EPOCH[22/1000] loss0.058-|Sample:14.12|
EPOCH[23/1000] loss0.057-|Sample:14.15|
EPOCH[24/1000] loss0.055-|Sample:14.36|
EPOCH[25/1000] loss0.054-|Sample:14.54|
EPOCH[26/1000] loss0.052-|Sample:14.32|
EPOCH[27/1000] loss0.051-|Sample:14.47|
EPOCH[28/1000] loss0.050-|Sample:14.45|
EPOCH[29/1000] loss0.049-|Sample:14.39|
EPOCH[30/1000] loss0.048-|Sample:14.56|
[TEST]
{'precision': array([0.01284311]), 'recall': array([0.03049239]), 'ndcg': array([0.0234599])}
EPOCH[31/1000] loss0.047-|Sample:14.25|
EPOCH[32/1000] loss0.046-|Sample:14.56|
EPOCH[33/1000] loss0.045-|Sample:14.28|
EPOCH[34/1000] loss0.044-|Sample:14.57|
EPOCH[35/1000] loss0.043-|Sample:14.54|
EPOCH[36/1000] loss0.043-|Sample:14.31|
EPOCH[37/1000] loss0.042-|Sample:14.43|
EPOCH[38/1000] loss0.041-|Sample:14.45|
EPOCH[39/1000] loss0.040-|Sample:14.53|
EPOCH[40/1000] loss0.040-|Sample:14.39|
[TEST]
{'precision': array([0.01331896]), 'recall': array([0.03180176]), 'ndcg': array([0.02452477])}
EPOCH[41/1000] loss0.039-|Sample:14.70|
EPOCH[42/1000] loss0.038-|Sample:14.26|
EPOCH[43/1000] loss0.038-|Sample:14.76|
EPOCH[44/1000] loss0.037-|Sample:14.51|
EPOCH[45/1000] loss0.037-|Sample:14.51|
EPOCH[46/1000] loss0.036-|Sample:14.28|
EPOCH[47/1000] loss0.036-|Sample:14.18|
EPOCH[48/1000] loss0.035-|Sample:14.45|
EPOCH[49/1000] loss0.035-|Sample:13.90|
EPOCH[50/1000] loss0.034-|Sample:14.11|
[TEST]
{'precision': array([0.013829]), 'recall': array([0.0333195]), 'ndcg': array([0.02551637])}
EPOCH[51/1000] loss0.034-|Sample:14.76|
EPOCH[52/1000] loss0.033-|Sample:14.23|
EPOCH[53/1000] loss0.033-|Sample:14.79|
EPOCH[54/1000] loss0.033-|Sample:14.32|
EPOCH[55/1000] loss0.032-|Sample:14.75|
EPOCH[56/1000] loss0.032-|Sample:14.43|
EPOCH[57/1000] loss0.031-|Sample:14.34|
EPOCH[58/1000] loss0.031-|Sample:14.57|
EPOCH[59/1000] loss0.031-|Sample:14.20|
EPOCH[60/1000] loss0.030-|Sample:14.40|
[TEST]
{'precision': array([0.01416618]), 'recall': array([0.03415577]), 'ndcg': array([0.02630407])}
EPOCH[61/1000] loss0.030-|Sample:14.70|
EPOCH[62/1000] loss0.030-|Sample:14.39|
EPOCH[63/1000] loss0.029-|Sample:14.29|
EPOCH[64/1000] loss0.029-|Sample:14.61|
EPOCH[65/1000] loss0.029-|Sample:14.25|
EPOCH[66/1000] loss0.029-|Sample:14.22|
EPOCH[67/1000] loss0.029-|Sample:14.54|
EPOCH[68/1000] loss0.028-|Sample:14.23|
EPOCH[69/1000] loss0.028-|Sample:14.06|
EPOCH[70/1000] loss0.028-|Sample:14.00|
[TEST]
{'precision': array([0.01454324]), 'recall': array([0.03519435]), 'ndcg': array([0.02703583])}
EPOCH[71/1000] loss0.027-|Sample:14.40|
EPOCH[72/1000] loss0.027-|Sample:14.31|
EPOCH[73/1000] loss0.027-|Sample:15.11|
EPOCH[74/1000] loss0.027-|Sample:14.22|
EPOCH[75/1000] loss0.027-|Sample:14.45|
EPOCH[76/1000] loss0.026-|Sample:14.28|
EPOCH[77/1000] loss0.026-|Sample:14.15|
EPOCH[78/1000] loss0.026-|Sample:14.56|
EPOCH[79/1000] loss0.026-|Sample:14.50|
EPOCH[80/1000] loss0.025-|Sample:14.43|
[TEST]
{'precision': array([0.014737]), 'recall': array([0.03558142]), 'ndcg': array([0.02736349])}
EPOCH[81/1000] loss0.026-|Sample:14.45|
EPOCH[82/1000] loss0.025-|Sample:14.79|
EPOCH[83/1000] loss0.025-|Sample:14.37|
EPOCH[84/1000] loss0.025-|Sample:14.15|
EPOCH[85/1000] loss0.025-|Sample:14.50|
EPOCH[86/1000] loss0.025-|Sample:14.57|
EPOCH[87/1000] loss0.024-|Sample:14.09|
EPOCH[88/1000] loss0.024-|Sample:13.87|
EPOCH[89/1000] loss0.024-|Sample:14.53|
EPOCH[90/1000] loss0.024-|Sample:14.23|
[TEST]
{'precision': array([0.01491556]), 'recall': array([0.03602136]), 'ndcg': array([0.02781486])}
EPOCH[91/1000] loss0.024-|Sample:14.65|
EPOCH[92/1000] loss0.023-|Sample:14.34|
EPOCH[93/1000] loss0.024-|Sample:14.59|
EPOCH[94/1000] loss0.023-|Sample:14.87|
EPOCH[95/1000] loss0.023-|Sample:14.22|
EPOCH[96/1000] loss0.023-|Sample:14.28|
EPOCH[97/1000] loss0.023-|Sample:14.62|
EPOCH[98/1000] loss0.023-|Sample:14.50|
EPOCH[99/1000] loss0.023-|Sample:14.43|
EPOCH[100/1000] loss0.023-|Sample:14.53|
[TEST]
{'precision': array([0.01516061]), 'recall': array([0.03660434]), 'ndcg': array([0.02830703])}
EPOCH[101/1000] loss0.023-|Sample:14.56|
EPOCH[102/1000] loss0.022-|Sample:14.25|
EPOCH[103/1000] loss0.022-|Sample:14.50|
EPOCH[104/1000] loss0.022-|Sample:14.07|
EPOCH[105/1000] loss0.022-|Sample:13.93|
EPOCH[106/1000] loss0.022-|Sample:13.95|
EPOCH[107/1000] loss0.022-|Sample:14.20|
EPOCH[108/1000] loss0.022-|Sample:14.56|
EPOCH[109/1000] loss0.022-|Sample:14.42|
EPOCH[110/1000] loss0.022-|Sample:14.15|
[TEST]
{'precision': array([0.01540946]), 'recall': array([0.03725817]), 'ndcg': array([0.02875546])}
EPOCH[111/1000] loss0.021-|Sample:14.75|
EPOCH[112/1000] loss0.021-|Sample:14.34|
EPOCH[113/1000] loss0.021-|Sample:14.18|
EPOCH[114/1000] loss0.021-|Sample:14.61|
EPOCH[115/1000] loss0.021-|Sample:14.25|
EPOCH[116/1000] loss0.021-|Sample:14.25|
EPOCH[117/1000] loss0.021-|Sample:14.29|
EPOCH[118/1000] loss0.021-|Sample:14.00|
EPOCH[119/1000] loss0.021-|Sample:14.47|
EPOCH[120/1000] loss0.021-|Sample:14.45|
[TEST]
{'precision': array([0.01560701]), 'recall': array([0.03778839]), 'ndcg': array([0.02906555])}
EPOCH[121/1000] loss0.021-|Sample:14.31|
EPOCH[122/1000] loss0.021-|Sample:14.22|
EPOCH[123/1000] loss0.021-|Sample:14.67|
EPOCH[124/1000] loss0.021-|Sample:13.93|
EPOCH[125/1000] loss0.020-|Sample:14.34|
EPOCH[126/1000] loss0.020-|Sample:14.50|
EPOCH[127/1000] loss0.020-|Sample:14.68|
EPOCH[128/1000] loss0.020-|Sample:14.40|
EPOCH[129/1000] loss0.020-|Sample:14.36|
EPOCH[130/1000] loss0.020-|Sample:14.34|
[TEST]
{'precision': array([0.01567825]), 'recall': array([0.03796724]), 'ndcg': array([0.0292644])}
EPOCH[131/1000] loss0.020-|Sample:14.12|
EPOCH[132/1000] loss0.020-|Sample:14.26|
EPOCH[133/1000] loss0.020-|Sample:13.81|
EPOCH[134/1000] loss0.020-|Sample:14.18|
EPOCH[135/1000] loss0.020-|Sample:13.98|
EPOCH[136/1000] loss0.020-|Sample:15.34|
EPOCH[137/1000] loss0.020-|Sample:14.28|
EPOCH[138/1000] loss0.020-|Sample:14.43|
EPOCH[139/1000] loss0.020-|Sample:14.65|
EPOCH[140/1000] loss0.019-|Sample:14.26|
[TEST]
{'precision': array([0.01583971]), 'recall': array([0.03846883]), 'ndcg': array([0.02960493])}
EPOCH[141/1000] loss0.019-|Sample:14.68|
EPOCH[142/1000] loss0.020-|Sample:14.01|
EPOCH[143/1000] loss0.019-|Sample:14.39|
EPOCH[144/1000] loss0.019-|Sample:14.47|
EPOCH[145/1000] loss0.019-|Sample:14.29|
EPOCH[146/1000] loss0.019-|Sample:14.34|
EPOCH[147/1000] loss0.019-|Sample:14.20|
EPOCH[148/1000] loss0.019-|Sample:14.14|
EPOCH[149/1000] loss0.019-|Sample:14.18|
EPOCH[150/1000] loss0.019-|Sample:14.06|
[TEST]
{'precision': array([0.01598598]), 'recall': array([0.03877932]), 'ndcg': array([0.02984444])}
EPOCH[151/1000] loss0.019-|Sample:14.79|
EPOCH[152/1000] loss0.019-|Sample:14.34|
EPOCH[153/1000] loss0.019-|Sample:14.14|
EPOCH[154/1000] loss0.019-|Sample:14.39|
EPOCH[155/1000] loss0.019-|Sample:14.45|
EPOCH[156/1000] loss0.019-|Sample:14.65|
EPOCH[157/1000] loss0.019-|Sample:14.39|
EPOCH[158/1000] loss0.019-|Sample:14.48|
EPOCH[159/1000] loss0.019-|Sample:14.32|
EPOCH[160/1000] loss0.019-|Sample:14.09|
[TEST]
{'precision': array([0.01608001]), 'recall': array([0.03898291]), 'ndcg': array([0.03001222])}
EPOCH[161/1000] loss0.019-|Sample:14.25|
EPOCH[162/1000] loss0.019-|Sample:13.89|
EPOCH[163/1000] loss0.019-|Sample:14.00|
EPOCH[164/1000] loss0.019-|Sample:14.00|
EPOCH[165/1000] loss0.018-|Sample:14.22|
EPOCH[166/1000] loss0.018-|Sample:14.36|
EPOCH[167/1000] loss0.018-|Sample:14.47|
EPOCH[168/1000] loss0.018-|Sample:14.32|
EPOCH[169/1000] loss0.018-|Sample:14.61|
EPOCH[170/1000] loss0.018-|Sample:14.51|
[TEST]
{'precision': array([0.0161465]), 'recall': array([0.03908351]), 'ndcg': array([0.03017896])}
EPOCH[171/1000] loss0.018-|Sample:14.07|
EPOCH[172/1000] loss0.018-|Sample:14.31|
EPOCH[173/1000] loss0.018-|Sample:14.48|
EPOCH[174/1000] loss0.018-|Sample:14.40|
EPOCH[175/1000] loss0.018-|Sample:14.64|
EPOCH[176/1000] loss0.018-|Sample:14.57|
EPOCH[177/1000] loss0.018-|Sample:14.18|
EPOCH[178/1000] loss0.018-|Sample:13.93|
EPOCH[179/1000] loss0.018-|Sample:13.90|
EPOCH[180/1000] loss0.018-|Sample:14.25|
[TEST]
{'precision': array([0.01616644]), 'recall': array([0.03927307]), 'ndcg': array([0.03023665])}
EPOCH[181/1000] loss0.018-|Sample:14.36|
EPOCH[182/1000] loss0.018-|Sample:14.09|
EPOCH[183/1000] loss0.018-|Sample:14.26|
EPOCH[184/1000] loss0.018-|Sample:14.14|
EPOCH[185/1000] loss0.018-|Sample:14.37|
EPOCH[186/1000] loss0.018-|Sample:14.32|
EPOCH[187/1000] loss0.018-|Sample:14.34|
EPOCH[188/1000] loss0.018-|Sample:14.31|
EPOCH[189/1000] loss0.018-|Sample:14.32|
EPOCH[190/1000] loss0.018-|Sample:14.22|
[TEST]
{'precision': array([0.01629941]), 'recall': array([0.03953091]), 'ndcg': array([0.03051736])}
EPOCH[191/1000] loss0.018-|Sample:14.43|
EPOCH[192/1000] loss0.018-|Sample:13.90|
EPOCH[193/1000] loss0.018-|Sample:13.90|
EPOCH[194/1000] loss0.018-|Sample:14.39|
EPOCH[195/1000] loss0.018-|Sample:14.29|
EPOCH[196/1000] loss0.018-|Sample:14.31|
EPOCH[197/1000] loss0.018-|Sample:14.59|
EPOCH[198/1000] loss0.018-|Sample:14.32|
EPOCH[199/1000] loss0.018-|Sample:14.31|
EPOCH[200/1000] loss0.017-|Sample:14.56|
[TEST]
{'precision': array([0.01622438]), 'recall': array([0.0394137]), 'ndcg': array([0.03046259])}
EPOCH[201/1000] loss0.018-|Sample:14.62|
EPOCH[202/1000] loss0.018-|Sample:14.51|
EPOCH[203/1000] loss0.017-|Sample:14.48|
EPOCH[204/1000] loss0.018-|Sample:14.23|
EPOCH[205/1000] loss0.018-|Sample:14.42|
EPOCH[206/1000] loss0.017-|Sample:14.32|
EPOCH[207/1000] loss0.017-|Sample:14.51|
EPOCH[208/1000] loss0.018-|Sample:14.26|
EPOCH[209/1000] loss0.017-|Sample:15.11|
EPOCH[210/1000] loss0.018-|Sample:14.26|
[TEST]
{'precision': array([0.01632696]), 'recall': array([0.03950221]), 'ndcg': array([0.03054243])}
EPOCH[211/1000] loss0.017-|Sample:14.45|
EPOCH[212/1000] loss0.017-|Sample:14.31|
EPOCH[213/1000] loss0.017-|Sample:14.57|
EPOCH[214/1000] loss0.017-|Sample:14.47|
EPOCH[215/1000] loss0.017-|Sample:14.45|
EPOCH[216/1000] loss0.017-|Sample:14.39|
EPOCH[217/1000] loss0.017-|Sample:14.26|
EPOCH[218/1000] loss0.017-|Sample:14.11|
EPOCH[219/1000] loss0.017-|Sample:14.18|
EPOCH[220/1000] loss0.017-|Sample:14.32|
[TEST]
{'precision': array([0.01637635]), 'recall': array([0.03971061]), 'ndcg': array([0.03069713])}
EPOCH[221/1000] loss0.017-|Sample:14.15|
EPOCH[222/1000] loss0.017-|Sample:14.15|
EPOCH[223/1000] loss0.017-|Sample:14.37|
EPOCH[224/1000] loss0.017-|Sample:14.28|
EPOCH[225/1000] loss0.017-|Sample:14.89|
EPOCH[226/1000] loss0.017-|Sample:14.15|
EPOCH[227/1000] loss0.017-|Sample:14.62|
EPOCH[228/1000] loss0.017-|Sample:14.61|
EPOCH[229/1000] loss0.017-|Sample:13.98|
EPOCH[230/1000] loss0.017-|Sample:14.45|
[TEST]
{'precision': array([0.01648652]), 'recall': array([0.03992724]), 'ndcg': array([0.03072854])}
EPOCH[231/1000] loss0.017-|Sample:14.31|
EPOCH[232/1000] loss0.017-|Sample:14.20|
EPOCH[233/1000] loss0.017-|Sample:14.43|
EPOCH[234/1000] loss0.017-|Sample:14.26|
EPOCH[235/1000] loss0.017-|Sample:14.29|
EPOCH[236/1000] loss0.017-|Sample:14.11|
EPOCH[237/1000] loss0.017-|Sample:14.15|
EPOCH[238/1000] loss0.017-|Sample:14.04|
EPOCH[239/1000] loss0.017-|Sample:14.26|
EPOCH[240/1000] loss0.017-|Sample:13.87|
[TEST]
{'precision': array([0.01651312]), 'recall': array([0.04004328]), 'ndcg': array([0.03087129])}
EPOCH[241/1000] loss0.017-|Sample:14.37|
EPOCH[242/1000] loss0.017-|Sample:14.15|
EPOCH[243/1000] loss0.017-|Sample:14.26|
EPOCH[244/1000] loss0.017-|Sample:14.53|
EPOCH[245/1000] loss0.017-|Sample:14.62|
EPOCH[246/1000] loss0.017-|Sample:14.29|
EPOCH[247/1000] loss0.017-|Sample:14.07|
EPOCH[248/1000] loss0.017-|Sample:14.39|
EPOCH[249/1000] loss0.017-|Sample:14.50|
EPOCH[250/1000] loss0.017-|Sample:14.22|
[TEST]
{'precision': array([0.01643618]), 'recall': array([0.03989357]), 'ndcg': array([0.0307912])}
EPOCH[251/1000] loss0.017-|Sample:14.39|
EPOCH[252/1000] loss0.017-|Sample:14.09|
EPOCH[253/1000] loss0.017-|Sample:14.07|
EPOCH[254/1000] loss0.017-|Sample:14.25|
EPOCH[255/1000] loss0.017-|Sample:14.17|
EPOCH[256/1000] loss0.017-|Sample:14.22|
EPOCH[257/1000] loss0.017-|Sample:14.70|
EPOCH[258/1000] loss0.017-|Sample:14.03|
EPOCH[259/1000] loss0.017-|Sample:14.51|
EPOCH[260/1000] loss0.017-|Sample:14.15|
[TEST]
{'precision': array([0.01659765]), 'recall': array([0.04025852]), 'ndcg': array([0.03111608])}
EPOCH[261/1000] loss0.017-|Sample:14.82|
EPOCH[262/1000] loss0.017-|Sample:14.39|
EPOCH[263/1000] loss0.017-|Sample:14.54|
EPOCH[264/1000] loss0.017-|Sample:14.47|
EPOCH[265/1000] loss0.017-|Sample:14.03|
EPOCH[266/1000] loss0.017-|Sample:14.31|
EPOCH[267/1000] loss0.017-|Sample:14.72|
EPOCH[268/1000] loss0.017-|Sample:14.09|
EPOCH[269/1000] loss0.017-|Sample:14.04|
EPOCH[270/1000] loss0.017-|Sample:14.31|
[TEST]
{'precision': array([0.01651312]), 'recall': array([0.04003269]), 'ndcg': array([0.0309432])}
EPOCH[271/1000] loss0.017-|Sample:14.56|
EPOCH[272/1000] loss0.017-|Sample:14.73|
EPOCH[273/1000] loss0.017-|Sample:14.36|
EPOCH[274/1000] loss0.017-|Sample:14.34|
EPOCH[275/1000] loss0.017-|Sample:14.78|
EPOCH[276/1000] loss0.017-|Sample:13.93|
EPOCH[277/1000] loss0.017-|Sample:14.73|
EPOCH[278/1000] loss0.017-|Sample:14.70|
EPOCH[279/1000] loss0.017-|Sample:14.26|
EPOCH[280/1000] loss0.017-|Sample:14.78|
[TEST]
{'precision': array([0.0166062]), 'recall': array([0.04028376]), 'ndcg': array([0.03106465])}
EPOCH[281/1000] loss0.017-|Sample:14.34|
EPOCH[282/1000] loss0.017-|Sample:14.40|
EPOCH[283/1000] loss0.017-|Sample:14.15|
EPOCH[284/1000] loss0.017-|Sample:14.29|
EPOCH[285/1000] loss0.017-|Sample:14.31|
EPOCH[286/1000] loss0.017-|Sample:13.89|
EPOCH[287/1000] loss0.017-|Sample:13.81|
EPOCH[288/1000] loss0.017-|Sample:14.36|
EPOCH[289/1000] loss0.017-|Sample:14.62|
EPOCH[290/1000] loss0.017-|Sample:14.68|
[TEST]
{'precision': array([0.01669073]), 'recall': array([0.04044272]), 'ndcg': array([0.03123137])}
EPOCH[291/1000] loss0.016-|Sample:14.53|
EPOCH[292/1000] loss0.016-|Sample:14.23|
EPOCH[293/1000] loss0.017-|Sample:14.37|
EPOCH[294/1000] loss0.017-|Sample:14.31|
EPOCH[295/1000] loss0.016-|Sample:14.65|
EPOCH[296/1000] loss0.017-|Sample:14.42|
EPOCH[297/1000] loss0.016-|Sample:14.39|
EPOCH[298/1000] loss0.016-|Sample:14.48|
EPOCH[299/1000] loss0.016-|Sample:14.37|
EPOCH[300/1000] loss0.016-|Sample:14.12|
[TEST]
{'precision': array([0.01676861]), 'recall': array([0.04082255]), 'ndcg': array([0.03143691])}
EPOCH[301/1000] loss0.017-|Sample:14.20|
EPOCH[302/1000] loss0.016-|Sample:13.87|
EPOCH[303/1000] loss0.017-|Sample:14.18|
EPOCH[304/1000] loss0.016-|Sample:14.29|
EPOCH[305/1000] loss0.017-|Sample:13.90|
EPOCH[306/1000] loss0.016-|Sample:14.47|
EPOCH[307/1000] loss0.016-|Sample:14.17|
EPOCH[308/1000] loss0.016-|Sample:14.42|
EPOCH[309/1000] loss0.016-|Sample:14.61|
EPOCH[310/1000] loss0.016-|Sample:14.11|
[TEST]
{'precision': array([0.01678001]), 'recall': array([0.04064157]), 'ndcg': array([0.03134744])}
EPOCH[311/1000] loss0.017-|Sample:14.82|
EPOCH[312/1000] loss0.016-|Sample:14.01|
EPOCH[313/1000] loss0.016-|Sample:14.84|
EPOCH[314/1000] loss0.016-|Sample:14.51|
EPOCH[315/1000] loss0.016-|Sample:14.07|
EPOCH[316/1000] loss0.016-|Sample:14.18|
EPOCH[317/1000] loss0.016-|Sample:14.20|
EPOCH[318/1000] loss0.016-|Sample:14.23|
EPOCH[319/1000] loss0.016-|Sample:14.25|
EPOCH[320/1000] loss0.016-|Sample:14.39|
[TEST]
{'precision': array([0.01666223]), 'recall': array([0.04046632]), 'ndcg': array([0.03129978])}
EPOCH[321/1000] loss0.016-|Sample:14.34|
EPOCH[322/1000] loss0.016-|Sample:14.57|
EPOCH[323/1000] loss0.016-|Sample:14.17|
EPOCH[324/1000] loss0.016-|Sample:14.15|
EPOCH[325/1000] loss0.016-|Sample:14.42|
EPOCH[326/1000] loss0.016-|Sample:14.48|
EPOCH[327/1000] loss0.016-|Sample:14.45|
EPOCH[328/1000] loss0.016-|Sample:14.67|
EPOCH[329/1000] loss0.016-|Sample:14.40|
EPOCH[330/1000] loss0.016-|Sample:14.28|
[TEST]
{'precision': array([0.01669738]), 'recall': array([0.04051428]), 'ndcg': array([0.0312598])}
EPOCH[331/1000] loss0.016-|Sample:14.20|
EPOCH[332/1000] loss0.016-|Sample:14.01|
EPOCH[333/1000] loss0.016-|Sample:13.97|
EPOCH[334/1000] loss0.016-|Sample:13.87|
EPOCH[335/1000] loss0.016-|Sample:14.53|
EPOCH[336/1000] loss0.016-|Sample:14.47|
EPOCH[337/1000] loss0.016-|Sample:14.48|
EPOCH[338/1000] loss0.016-|Sample:14.34|
EPOCH[339/1000] loss0.016-|Sample:14.51|
EPOCH[340/1000] loss0.016-|Sample:14.37|
[TEST]
{'precision': array([0.01673917]), 'recall': array([0.04064529]), 'ndcg': array([0.03135251])}
EPOCH[341/1000] loss0.016-|Sample:14.20|
EPOCH[342/1000] loss0.016-|Sample:14.18|
EPOCH[343/1000] loss0.016-|Sample:14.43|
EPOCH[344/1000] loss0.016-|Sample:14.29|
EPOCH[345/1000] loss0.016-|Sample:14.22|
EPOCH[346/1000] loss0.016-|Sample:14.34|
EPOCH[347/1000] loss0.016-|Sample:14.64|
EPOCH[348/1000] loss0.016-|Sample:14.04|
EPOCH[349/1000] loss0.016-|Sample:13.87|
EPOCH[350/1000] loss0.016-|Sample:14.31|
[TEST]
{'precision': array([0.0168294]), 'recall': array([0.04091817]), 'ndcg': array([0.03150056])}
EPOCH[351/1000] loss0.016-|Sample:14.59|
EPOCH[352/1000] loss0.016-|Sample:14.01|
EPOCH[353/1000] loss0.016-|Sample:14.48|
EPOCH[354/1000] loss0.016-|Sample:15.01|
EPOCH[355/1000] loss0.016-|Sample:14.42|
EPOCH[356/1000] loss0.016-|Sample:14.59|
EPOCH[357/1000] loss0.016-|Sample:14.36|
EPOCH[358/1000] loss0.016-|Sample:14.43|
EPOCH[359/1000] loss0.016-|Sample:14.53|
EPOCH[360/1000] loss0.016-|Sample:14.32|
[TEST]
{'precision': array([0.01684649]), 'recall': array([0.04093877]), 'ndcg': array([0.03146631])}
EPOCH[361/1000] loss0.016-|Sample:14.40|
EPOCH[362/1000] loss0.016-|Sample:14.34|
EPOCH[363/1000] loss0.016-|Sample:13.57|
EPOCH[364/1000] loss0.016-|Sample:13.64|
EPOCH[365/1000] loss0.016-|Sample:13.47|
EPOCH[366/1000] loss0.016-|Sample:13.50|
EPOCH[367/1000] loss0.016-|Sample:13.68|
EPOCH[368/1000] loss0.016-|Sample:13.48|
EPOCH[369/1000] loss0.016-|Sample:13.57|
EPOCH[370/1000] loss0.016-|Sample:13.70|
[TEST]
{'precision': array([0.01675911]), 'recall': array([0.0406583]), 'ndcg': array([0.03133588])}
EPOCH[371/1000] loss0.016-|Sample:13.50|
EPOCH[372/1000] loss0.016-|Sample:13.51|
EPOCH[373/1000] loss0.016-|Sample:13.57|
EPOCH[374/1000] loss0.016-|Sample:13.51|
EPOCH[375/1000] loss0.016-|Sample:13.81|
EPOCH[376/1000] loss0.016-|Sample:13.47|
EPOCH[377/1000] loss0.016-|Sample:13.56|
EPOCH[378/1000] loss0.016-|Sample:13.67|
EPOCH[379/1000] loss0.016-|Sample:13.45|
EPOCH[380/1000] loss0.016-|Sample:13.61|
[TEST]
{'precision': array([0.01684459]), 'recall': array([0.0409116]), 'ndcg': array([0.0316158])}
EPOCH[381/1000] loss0.016-|Sample:13.43|
EPOCH[382/1000] loss0.016-|Sample:13.62|
EPOCH[383/1000] loss0.016-|Sample:13.51|
EPOCH[384/1000] loss0.016-|Sample:13.45|
EPOCH[385/1000] loss0.016-|Sample:13.56|
EPOCH[386/1000] loss0.016-|Sample:13.59|
EPOCH[387/1000] loss0.016-|Sample:13.53|
EPOCH[388/1000] loss0.016-|Sample:13.62|
EPOCH[389/1000] loss0.016-|Sample:13.70|
EPOCH[390/1000] loss0.016-|Sample:13.54|
[TEST]
{'precision': array([0.0168085]), 'recall': array([0.04078965]), 'ndcg': array([0.03145841])}
EPOCH[391/1000] loss0.016-|Sample:13.61|
EPOCH[392/1000] loss0.016-|Sample:13.37|
EPOCH[393/1000] loss0.016-|Sample:13.61|
EPOCH[394/1000] loss0.016-|Sample:13.57|
EPOCH[395/1000] loss0.016-|Sample:13.47|
EPOCH[396/1000] loss0.016-|Sample:13.48|
EPOCH[397/1000] loss0.016-|Sample:13.50|
EPOCH[398/1000] loss0.016-|Sample:13.57|
EPOCH[399/1000] loss0.016-|Sample:13.45|
EPOCH[400/1000] loss0.016-|Sample:13.42|
[TEST]
{'precision': array([0.01689588]), 'recall': array([0.04100507]), 'ndcg': array([0.03162287])}
EPOCH[401/1000] loss0.016-|Sample:13.57|
EPOCH[402/1000] loss0.016-|Sample:13.50|
EPOCH[403/1000] loss0.016-|Sample:13.67|
EPOCH[404/1000] loss0.016-|Sample:13.43|
EPOCH[405/1000] loss0.016-|Sample:13.45|
EPOCH[406/1000] loss0.016-|Sample:13.54|
EPOCH[407/1000] loss0.016-|Sample:13.57|
EPOCH[408/1000] loss0.016-|Sample:13.56|
EPOCH[409/1000] loss0.016-|Sample:13.64|
EPOCH[410/1000] loss0.016-|Sample:13.42|
[TEST]
{'precision': array([0.01692058]), 'recall': array([0.04094785]), 'ndcg': array([0.03152758])}
EPOCH[411/1000] loss0.016-|Sample:13.51|
EPOCH[412/1000] loss0.016-|Sample:13.45|
EPOCH[413/1000] loss0.016-|Sample:13.43|
EPOCH[414/1000] loss0.016-|Sample:13.61|
EPOCH[415/1000] loss0.016-|Sample:13.61|
EPOCH[416/1000] loss0.016-|Sample:13.53|
EPOCH[417/1000] loss0.016-|Sample:13.68|
EPOCH[418/1000] loss0.016-|Sample:13.43|
EPOCH[419/1000] loss0.016-|Sample:13.50|
EPOCH[420/1000] loss0.016-|Sample:13.64|
[TEST]
{'precision': array([0.01689113]), 'recall': array([0.04102309]), 'ndcg': array([0.0315874])}
EPOCH[421/1000] loss0.016-|Sample:13.57|
EPOCH[422/1000] loss0.016-|Sample:13.51|
EPOCH[423/1000] loss0.016-|Sample:13.61|
EPOCH[424/1000] loss0.016-|Sample:13.45|
EPOCH[425/1000] loss0.016-|Sample:13.62|
EPOCH[426/1000] loss0.016-|Sample:13.40|
EPOCH[427/1000] loss0.016-|Sample:13.50|
EPOCH[428/1000] loss0.016-|Sample:13.65|
EPOCH[429/1000] loss0.016-|Sample:13.40|
EPOCH[430/1000] loss0.016-|Sample:13.64|
[TEST]
{'precision': array([0.01690443]), 'recall': array([0.04095715]), 'ndcg': array([0.03170144])}
EPOCH[431/1000] loss0.016-|Sample:13.39|
EPOCH[432/1000] loss0.016-|Sample:13.57|
EPOCH[433/1000] loss0.016-|Sample:13.57|
EPOCH[434/1000] loss0.016-|Sample:13.47|
EPOCH[435/1000] loss0.016-|Sample:13.56|
EPOCH[436/1000] loss0.016-|Sample:13.56|
EPOCH[437/1000] loss0.016-|Sample:13.47|
EPOCH[438/1000] loss0.016-|Sample:13.56|
EPOCH[439/1000] loss0.016-|Sample:13.61|
EPOCH[440/1000] loss0.016-|Sample:13.48|
[TEST]
{'precision': array([0.01697187]), 'recall': array([0.0412591]), 'ndcg': array([0.0317718])}
EPOCH[441/1000] loss0.016-|Sample:13.57|
EPOCH[442/1000] loss0.016-|Sample:13.37|
EPOCH[443/1000] loss0.016-|Sample:13.62|
EPOCH[444/1000] loss0.016-|Sample:13.61|
EPOCH[445/1000] loss0.016-|Sample:13.51|
EPOCH[446/1000] loss0.016-|Sample:13.50|
EPOCH[447/1000] loss0.016-|Sample:13.56|
EPOCH[448/1000] loss0.016-|Sample:13.65|
EPOCH[449/1000] loss0.016-|Sample:13.61|
EPOCH[450/1000] loss0.016-|Sample:13.47|
[TEST]
{'precision': array([0.01702601]), 'recall': array([0.04126207]), 'ndcg': array([0.03183913])}
EPOCH[451/1000] loss0.016-|Sample:13.67|
EPOCH[452/1000] loss0.016-|Sample:13.50|
EPOCH[453/1000] loss0.016-|Sample:13.70|
EPOCH[454/1000] loss0.016-|Sample:13.51|
EPOCH[455/1000] loss0.016-|Sample:13.47|
EPOCH[456/1000] loss0.016-|Sample:13.62|
EPOCH[457/1000] loss0.016-|Sample:13.36|
EPOCH[458/1000] loss0.016-|Sample:13.61|
EPOCH[459/1000] loss0.016-|Sample:13.65|
EPOCH[460/1000] loss0.016-|Sample:13.47|
[TEST]
{'precision': array([0.01692438]), 'recall': array([0.04093841]), 'ndcg': array([0.03169942])}
EPOCH[461/1000] loss0.016-|Sample:13.61|
EPOCH[462/1000] loss0.016-|Sample:13.36|
EPOCH[463/1000] loss0.016-|Sample:13.59|
EPOCH[464/1000] loss0.016-|Sample:13.62|
EPOCH[465/1000] loss0.016-|Sample:13.45|
EPOCH[466/1000] loss0.016-|Sample:13.47|
EPOCH[467/1000] loss0.016-|Sample:13.64|
EPOCH[468/1000] loss0.016-|Sample:13.42|
EPOCH[469/1000] loss0.016-|Sample:13.62|
EPOCH[470/1000] loss0.016-|Sample:13.64|
[TEST]
{'precision': array([0.01692913]), 'recall': array([0.041058]), 'ndcg': array([0.03156675])}
EPOCH[471/1000] loss0.016-|Sample:13.47|
EPOCH[472/1000] loss0.016-|Sample:13.57|
EPOCH[473/1000] loss0.016-|Sample:13.73|
EPOCH[474/1000] loss0.016-|Sample:13.48|
EPOCH[475/1000] loss0.016-|Sample:13.67|
EPOCH[476/1000] loss0.016-|Sample:13.48|
EPOCH[477/1000] loss0.016-|Sample:13.59|
EPOCH[478/1000] loss0.016-|Sample:13.59|
EPOCH[479/1000] loss0.016-|Sample:13.39|
EPOCH[480/1000] loss0.016-|Sample:13.61|
[TEST]
{'precision': array([0.01688639]), 'recall': array([0.04098406]), 'ndcg': array([0.03159282])}
EPOCH[481/1000] loss0.016-|Sample:13.53|
EPOCH[482/1000] loss0.016-|Sample:13.61|
EPOCH[483/1000] loss0.016-|Sample:13.57|
EPOCH[484/1000] loss0.016-|Sample:13.53|
EPOCH[485/1000] loss0.016-|Sample:13.51|
EPOCH[486/1000] loss0.016-|Sample:13.62|
EPOCH[487/1000] loss0.016-|Sample:13.45|
EPOCH[488/1000] loss0.016-|Sample:13.62|
EPOCH[489/1000] loss0.016-|Sample:13.65|
EPOCH[490/1000] loss0.016-|Sample:13.40|
[TEST]
{'precision': array([0.01681515]), 'recall': array([0.04067798]), 'ndcg': array([0.0315015])}
EPOCH[491/1000] loss0.016-|Sample:13.64|
EPOCH[492/1000] loss0.016-|Sample:13.48|
EPOCH[493/1000] loss0.016-|Sample:13.59|
EPOCH[494/1000] loss0.016-|Sample:13.61|
EPOCH[495/1000] loss0.016-|Sample:13.56|
EPOCH[496/1000] loss0.016-|Sample:13.57|
EPOCH[497/1000] loss0.016-|Sample:13.65|
EPOCH[498/1000] loss0.016-|Sample:13.61|
EPOCH[499/1000] loss0.016-|Sample:13.59|
EPOCH[500/1000] loss0.016-|Sample:13.47|
[TEST]
{'precision': array([0.01689493]), 'recall': array([0.04094141]), 'ndcg': array([0.03160132])}
EPOCH[501/1000] loss0.016-|Sample:13.73|
EPOCH[502/1000] loss0.016-|Sample:13.61|
EPOCH[503/1000] loss0.016-|Sample:13.65|
EPOCH[504/1000] loss0.016-|Sample:13.59|
EPOCH[505/1000] loss0.016-|Sample:13.54|
EPOCH[506/1000] loss0.016-|Sample:13.65|
EPOCH[507/1000] loss0.016-|Sample:13.51|
EPOCH[508/1000] loss0.016-|Sample:13.59|
EPOCH[509/1000] loss0.016-|Sample:13.76|
EPOCH[510/1000] loss0.016-|Sample:13.48|
[TEST]
{'precision': array([0.01683985]), 'recall': array([0.04088391]), 'ndcg': array([0.0315962])}
EPOCH[511/1000] loss0.016-|Sample:13.61|
EPOCH[512/1000] loss0.016-|Sample:13.36|
EPOCH[513/1000] loss0.016-|Sample:13.54|
EPOCH[514/1000] loss0.016-|Sample:13.67|
EPOCH[515/1000] loss0.016-|Sample:13.50|
EPOCH[516/1000] loss0.016-|Sample:13.48|
EPOCH[517/1000] loss0.016-|Sample:13.64|
EPOCH[518/1000] loss0.016-|Sample:13.42|
EPOCH[519/1000] loss0.016-|Sample:13.43|
EPOCH[520/1000] loss0.016-|Sample:13.61|
[TEST]
{'precision': array([0.01697662]), 'recall': array([0.04115113]), 'ndcg': array([0.03177121])}
EPOCH[521/1000] loss0.016-|Sample:13.48|
EPOCH[522/1000] loss0.016-|Sample:13.53|
EPOCH[523/1000] loss0.016-|Sample:13.67|
EPOCH[524/1000] loss0.016-|Sample:13.42|
EPOCH[525/1000] loss0.016-|Sample:13.64|
EPOCH[526/1000] loss0.016-|Sample:13.48|
EPOCH[527/1000] loss0.016-|Sample:13.57|
EPOCH[528/1000] loss0.016-|Sample:13.61|
EPOCH[529/1000] loss0.016-|Sample:13.47|
EPOCH[530/1000] loss0.016-|Sample:13.50|
[TEST]
{'precision': array([0.01686169]), 'recall': array([0.04091346]), 'ndcg': array([0.03163316])}
EPOCH[531/1000] loss0.016-|Sample:13.50|
EPOCH[532/1000] loss0.016-|Sample:13.59|
EPOCH[533/1000] loss0.016-|Sample:13.50|
EPOCH[534/1000] loss0.016-|Sample:13.31|
EPOCH[535/1000] loss0.016-|Sample:13.50|
EPOCH[536/1000] loss0.016-|Sample:13.42|
EPOCH[537/1000] loss0.016-|Sample:13.48|
EPOCH[538/1000] loss0.016-|Sample:13.53|
EPOCH[539/1000] loss0.016-|Sample:13.62|
EPOCH[540/1000] loss0.016-|Sample:13.40|
[TEST]
{'precision': array([0.01689493]), 'recall': array([0.04100854]), 'ndcg': array([0.03177601])}
EPOCH[541/1000] loss0.016-|Sample:13.62|
EPOCH[542/1000] loss0.016-|Sample:13.40|
EPOCH[543/1000] loss0.016-|Sample:13.56|
EPOCH[544/1000] loss0.016-|Sample:13.65|
EPOCH[545/1000] loss0.016-|Sample:13.53|
EPOCH[546/1000] loss0.016-|Sample:13.43|
EPOCH[547/1000] loss0.016-|Sample:13.53|
EPOCH[548/1000] loss0.016-|Sample:13.56|
EPOCH[549/1000] loss0.016-|Sample:13.47|
EPOCH[550/1000] loss0.016-|Sample:13.51|
[TEST]
{'precision': array([0.01692058]), 'recall': array([0.04111786]), 'ndcg': array([0.03188763])}
EPOCH[551/1000] loss0.016-|Sample:13.56|
EPOCH[552/1000] loss0.016-|Sample:13.59|
EPOCH[553/1000] loss0.016-|Sample:13.72|
EPOCH[554/1000] loss0.016-|Sample:13.56|
EPOCH[555/1000] loss0.016-|Sample:13.67|
EPOCH[556/1000] loss0.016-|Sample:13.61|
EPOCH[557/1000] loss0.016-|Sample:13.57|
EPOCH[558/1000] loss0.016-|Sample:13.64|
EPOCH[559/1000] loss0.016-|Sample:13.65|
EPOCH[560/1000] loss0.016-|Sample:13.54|
[TEST]
{'precision': array([0.01699846]), 'recall': array([0.04130492]), 'ndcg': array([0.03193808])}
EPOCH[561/1000] loss0.016-|Sample:13.64|
EPOCH[562/1000] loss0.016-|Sample:13.43|
EPOCH[563/1000] loss0.016-|Sample:13.64|
EPOCH[564/1000] loss0.016-|Sample:13.70|
EPOCH[565/1000] loss0.016-|Sample:13.50|
EPOCH[566/1000] loss0.016-|Sample:13.57|
EPOCH[567/1000] loss0.016-|Sample:13.73|
EPOCH[568/1000] loss0.016-|Sample:13.59|
EPOCH[569/1000] loss0.016-|Sample:13.65|
EPOCH[570/1000] loss0.016-|Sample:13.65|
[TEST]
{'precision': array([0.01697282]), 'recall': array([0.04128896]), 'ndcg': array([0.03183556])}
EPOCH[571/1000] loss0.016-|Sample:13.48|
EPOCH[572/1000] loss0.016-|Sample:13.57|
EPOCH[573/1000] loss0.016-|Sample:13.76|
EPOCH[574/1000] loss0.016-|Sample:13.42|
EPOCH[575/1000] loss0.016-|Sample:13.73|
EPOCH[576/1000] loss0.016-|Sample:13.54|
EPOCH[577/1000] loss0.016-|Sample:13.68|
EPOCH[578/1000] loss0.016-|Sample:13.56|
EPOCH[579/1000] loss0.016-|Sample:13.47|
EPOCH[580/1000] loss0.016-|Sample:13.73|
[TEST]
{'precision': array([0.01700796]), 'recall': array([0.04134259]), 'ndcg': array([0.03192384])}
EPOCH[581/1000] loss0.016-|Sample:13.54|
EPOCH[582/1000] loss0.016-|Sample:13.70|
EPOCH[583/1000] loss0.016-|Sample:13.54|
EPOCH[584/1000] loss0.016-|Sample:13.53|
EPOCH[585/1000] loss0.016-|Sample:13.53|
EPOCH[586/1000] loss0.016-|Sample:13.59|
EPOCH[587/1000] loss0.016-|Sample:13.54|
EPOCH[588/1000] loss0.016-|Sample:13.61|
EPOCH[589/1000] loss0.016-|Sample:13.53|
EPOCH[590/1000] loss0.016-|Sample:13.45|
[TEST]
{'precision': array([0.01698611]), 'recall': array([0.0412722]), 'ndcg': array([0.0319605])}
EPOCH[591/1000] loss0.016-|Sample:13.64|
EPOCH[592/1000] loss0.016-|Sample:13.37|
EPOCH[593/1000] loss0.016-|Sample:13.51|
EPOCH[594/1000] loss0.016-|Sample:13.59|
EPOCH[595/1000] loss0.016-|Sample:13.64|
EPOCH[596/1000] loss0.016-|Sample:13.51|
EPOCH[597/1000] loss0.016-|Sample:13.54|
EPOCH[598/1000] loss0.016-|Sample:13.54|
EPOCH[599/1000] loss0.016-|Sample:13.56|
EPOCH[600/1000] loss0.016-|Sample:13.34|
[TEST]
{'precision': array([0.01702506]), 'recall': array([0.04135176]), 'ndcg': array([0.03188865])}
EPOCH[601/1000] loss0.016-|Sample:13.54|
EPOCH[602/1000] loss0.016-|Sample:13.51|
EPOCH[603/1000] loss0.016-|Sample:13.57|
EPOCH[604/1000] loss0.016-|Sample:13.40|
EPOCH[605/1000] loss0.016-|Sample:13.47|
EPOCH[606/1000] loss0.016-|Sample:13.53|
EPOCH[607/1000] loss0.016-|Sample:13.45|
EPOCH[608/1000] loss0.016-|Sample:13.48|
EPOCH[609/1000] loss0.016-|Sample:13.67|
EPOCH[610/1000] loss0.016-|Sample:13.43|
[TEST]
{'precision': array([0.01698137]), 'recall': array([0.04113882]), 'ndcg': array([0.03185117])}
EPOCH[611/1000] loss0.016-|Sample:13.57|
EPOCH[612/1000] loss0.016-|Sample:13.40|
EPOCH[613/1000] loss0.016-|Sample:13.54|
EPOCH[614/1000] loss0.016-|Sample:13.62|
EPOCH[615/1000] loss0.016-|Sample:13.48|
EPOCH[616/1000] loss0.016-|Sample:13.43|
EPOCH[617/1000] loss0.016-|Sample:13.62|
EPOCH[618/1000] loss0.016-|Sample:13.42|
EPOCH[619/1000] loss0.016-|Sample:13.51|
EPOCH[620/1000] loss0.016-|Sample:13.51|
[TEST]
{'precision': array([0.01696902]), 'recall': array([0.04118377]), 'ndcg': array([0.0317381])}
EPOCH[621/1000] loss0.016-|Sample:13.33|
EPOCH[622/1000] loss0.016-|Sample:13.53|
EPOCH[623/1000] loss0.016-|Sample:13.65|
EPOCH[624/1000] loss0.016-|Sample:13.43|
EPOCH[625/1000] loss0.016-|Sample:13.62|
EPOCH[626/1000] loss0.016-|Sample:13.45|
EPOCH[627/1000] loss0.016-|Sample:13.53|
EPOCH[628/1000] loss0.016-|Sample:13.62|
EPOCH[629/1000] loss0.016-|Sample:13.50|
EPOCH[630/1000] loss0.016-|Sample:13.62|
[TEST]
{'precision': array([0.01696332]), 'recall': array([0.041142]), 'ndcg': array([0.03175065])}
EPOCH[631/1000] loss0.016-|Sample:13.40|
EPOCH[632/1000] loss0.016-|Sample:13.54|
EPOCH[633/1000] loss0.016-|Sample:13.50|
EPOCH[634/1000] loss0.016-|Sample:13.45|
EPOCH[635/1000] loss0.016-|Sample:13.51|
EPOCH[636/1000] loss0.016-|Sample:13.51|
EPOCH[637/1000] loss0.016-|Sample:13.42|
EPOCH[638/1000] loss0.016-|Sample:13.51|
EPOCH[639/1000] loss0.016-|Sample:13.65|
EPOCH[640/1000] loss0.016-|Sample:13.40|
[TEST]
{'precision': array([0.01698611]), 'recall': array([0.04121983]), 'ndcg': array([0.03190365])}
EPOCH[641/1000] loss0.016-|Sample:14.09|
EPOCH[642/1000] loss0.016-|Sample:13.29|
EPOCH[643/1000] loss0.016-|Sample:13.51|
EPOCH[644/1000] loss0.016-|Sample:13.57|
EPOCH[645/1000] loss0.016-|Sample:13.40|
EPOCH[646/1000] loss0.016-|Sample:13.53|
EPOCH[647/1000] loss0.016-|Sample:13.54|
EPOCH[648/1000] loss0.016-|Sample:13.73|
EPOCH[649/1000] loss0.016-|Sample:13.53|
EPOCH[650/1000] loss0.016-|Sample:13.39|
[TEST]
{'precision': array([0.01693672]), 'recall': array([0.04112953]), 'ndcg': array([0.0318111])}
EPOCH[651/1000] loss0.016-|Sample:13.50|
EPOCH[652/1000] loss0.016-|Sample:13.57|
EPOCH[653/1000] loss0.016-|Sample:13.64|
EPOCH[654/1000] loss0.016-|Sample:13.42|
EPOCH[655/1000] loss0.016-|Sample:13.62|
EPOCH[656/1000] loss0.016-|Sample:13.51|
EPOCH[657/1000] loss0.016-|Sample:13.51|
EPOCH[658/1000] loss0.016-|Sample:13.56|
EPOCH[659/1000] loss0.016-|Sample:13.64|
EPOCH[660/1000] loss0.016-|Sample:13.51|
[TEST]
{'precision': array([0.01700226]), 'recall': array([0.04114531]), 'ndcg': array([0.03183347])}
EPOCH[661/1000] loss0.016-|Sample:13.51|
EPOCH[662/1000] loss0.016-|Sample:13.43|
EPOCH[663/1000] loss0.016-|Sample:13.61|
EPOCH[664/1000] loss0.016-|Sample:13.56|
EPOCH[665/1000] loss0.016-|Sample:13.47|
EPOCH[666/1000] loss0.016-|Sample:13.48|
EPOCH[667/1000] loss0.016-|Sample:13.68|
EPOCH[668/1000] loss0.016-|Sample:13.50|
EPOCH[669/1000] loss0.016-|Sample:13.51|
EPOCH[670/1000] loss0.016-|Sample:13.57|
[TEST]
{'precision': array([0.01694242]), 'recall': array([0.04112391]), 'ndcg': array([0.03175962])}
EPOCH[671/1000] loss0.016-|Sample:13.26|
EPOCH[672/1000] loss0.016-|Sample:13.51|
EPOCH[673/1000] loss0.016-|Sample:13.61|
EPOCH[674/1000] loss0.016-|Sample:13.48|
EPOCH[675/1000] loss0.016-|Sample:13.53|
EPOCH[676/1000] loss0.016-|Sample:13.45|
EPOCH[677/1000] loss0.016-|Sample:13.73|
EPOCH[678/1000] loss0.016-|Sample:13.82|
EPOCH[679/1000] loss0.016-|Sample:13.53|
EPOCH[680/1000] loss0.016-|Sample:13.70|
[TEST]
{'precision': array([0.01708489]), 'recall': array([0.04147452]), 'ndcg': array([0.03204603])}
EPOCH[681/1000] loss0.016-|Sample:13.48|
EPOCH[682/1000] loss0.016-|Sample:13.54|
EPOCH[683/1000] loss0.016-|Sample:13.64|
EPOCH[684/1000] loss0.016-|Sample:13.48|
EPOCH[685/1000] loss0.016-|Sample:13.59|
EPOCH[686/1000] loss0.016-|Sample:13.57|
EPOCH[687/1000] loss0.016-|Sample:13.48|
EPOCH[688/1000] loss0.016-|Sample:13.62|
EPOCH[689/1000] loss0.016-|Sample:13.72|
EPOCH[690/1000] loss0.016-|Sample:13.47|
[TEST]
{'precision': array([0.01699846]), 'recall': array([0.04122917]), 'ndcg': array([0.03187957])}
EPOCH[691/1000] loss0.016-|Sample:13.51|
EPOCH[692/1000] loss0.016-|Sample:13.34|
EPOCH[693/1000] loss0.016-|Sample:13.62|
EPOCH[694/1000] loss0.016-|Sample:13.59|
EPOCH[695/1000] loss0.016-|Sample:13.50|
EPOCH[696/1000] loss0.016-|Sample:13.47|
EPOCH[697/1000] loss0.016-|Sample:13.65|
EPOCH[698/1000] loss0.016-|Sample:13.59|
EPOCH[699/1000] loss0.016-|Sample:13.45|
EPOCH[700/1000] loss0.016-|Sample:13.41|
[TEST]
{'precision': array([0.01702885]), 'recall': array([0.04128848]), 'ndcg': array([0.03203892])}
EPOCH[701/1000] loss0.016-|Sample:13.64|
EPOCH[702/1000] loss0.016-|Sample:13.43|
EPOCH[703/1000] loss0.016-|Sample:13.59|
EPOCH[704/1000] loss0.016-|Sample:13.43|
EPOCH[705/1000] loss0.016-|Sample:13.39|
EPOCH[706/1000] loss0.016-|Sample:13.61|
EPOCH[707/1000] loss0.016-|Sample:13.48|
EPOCH[708/1000] loss0.016-|Sample:13.53|
EPOCH[709/1000] loss0.016-|Sample:13.62|
EPOCH[710/1000] loss0.016-|Sample:13.56|
[TEST]
{'precision': array([0.01708964]), 'recall': array([0.04152399]), 'ndcg': array([0.03206222])}
EPOCH[711/1000] loss0.016-|Sample:13.57|
EPOCH[712/1000] loss0.016-|Sample:13.37|
EPOCH[713/1000] loss0.016-|Sample:13.53|
EPOCH[714/1000] loss0.015-|Sample:13.54|
EPOCH[715/1000] loss0.015-|Sample:13.50|
EPOCH[716/1000] loss0.016-|Sample:13.81|
EPOCH[717/1000] loss0.016-|Sample:13.64|
EPOCH[718/1000] loss0.015-|Sample:13.43|
EPOCH[719/1000] loss0.016-|Sample:13.56|
EPOCH[720/1000] loss0.016-|Sample:13.59|
[TEST]
{'precision': array([0.01698896]), 'recall': array([0.04124695]), 'ndcg': array([0.03196986])}
EPOCH[721/1000] loss0.016-|Sample:13.53|
EPOCH[722/1000] loss0.016-|Sample:13.48|
EPOCH[723/1000] loss0.016-|Sample:13.59|
EPOCH[724/1000] loss0.016-|Sample:13.39|
EPOCH[725/1000] loss0.016-|Sample:13.59|
EPOCH[726/1000] loss0.016-|Sample:13.39|
EPOCH[727/1000] loss0.016-|Sample:13.33|
EPOCH[728/1000] loss0.016-|Sample:13.64|
EPOCH[729/1000] loss0.016-|Sample:13.39|
EPOCH[730/1000] loss0.016-|Sample:13.54|
[TEST]
{'precision': array([0.01695287]), 'recall': array([0.04115845]), 'ndcg': array([0.03187083])}
EPOCH[731/1000] loss0.016-|Sample:13.47|
EPOCH[732/1000] loss0.016-|Sample:13.56|
EPOCH[733/1000] loss0.016-|Sample:13.50|
EPOCH[734/1000] loss0.016-|Sample:13.70|
EPOCH[735/1000] loss0.016-|Sample:13.65|
EPOCH[736/1000] loss0.016-|Sample:13.62|
EPOCH[737/1000] loss0.016-|Sample:13.51|
EPOCH[738/1000] loss0.016-|Sample:13.56|
EPOCH[739/1000] loss0.016-|Sample:13.76|
EPOCH[740/1000] loss0.016-|Sample:13.45|
[TEST]
{'precision': array([0.01715328]), 'recall': array([0.04176153]), 'ndcg': array([0.03214148])}
EPOCH[741/1000] loss0.016-|Sample:13.48|
EPOCH[742/1000] loss0.016-|Sample:13.42|
EPOCH[743/1000] loss0.016-|Sample:13.53|
EPOCH[744/1000] loss0.016-|Sample:13.59|
EPOCH[745/1000] loss0.016-|Sample:13.47|
EPOCH[746/1000] loss0.016-|Sample:13.68|
EPOCH[747/1000] loss0.016-|Sample:13.53|
EPOCH[748/1000] loss0.015-|Sample:13.61|
EPOCH[749/1000] loss0.016-|Sample:13.67|
EPOCH[750/1000] loss0.016-|Sample:13.37|
[TEST]
{'precision': array([0.01700606]), 'recall': array([0.04135646]), 'ndcg': array([0.03198086])}
EPOCH[751/1000] loss0.015-|Sample:13.72|
EPOCH[752/1000] loss0.015-|Sample:13.54|
EPOCH[753/1000] loss0.016-|Sample:13.62|
EPOCH[754/1000] loss0.015-|Sample:13.54|
EPOCH[755/1000] loss0.016-|Sample:13.42|
EPOCH[756/1000] loss0.016-|Sample:13.54|
EPOCH[757/1000] loss0.016-|Sample:13.48|
EPOCH[758/1000] loss0.016-|Sample:13.59|
EPOCH[759/1000] loss0.016-|Sample:13.61|
EPOCH[760/1000] loss0.016-|Sample:13.39|
[TEST]
{'precision': array([0.01713048]), 'recall': array([0.04171513]), 'ndcg': array([0.03212755])}
EPOCH[761/1000] loss0.016-|Sample:13.64|
EPOCH[762/1000] loss0.016-|Sample:13.51|
EPOCH[763/1000] loss0.016-|Sample:13.56|
EPOCH[764/1000] loss0.016-|Sample:13.64|
EPOCH[765/1000] loss0.016-|Sample:13.56|
EPOCH[766/1000] loss0.016-|Sample:13.48|
EPOCH[767/1000] loss0.016-|Sample:13.70|
EPOCH[768/1000] loss0.016-|Sample:13.47|
EPOCH[769/1000] loss0.015-|Sample:13.50|
EPOCH[770/1000] loss0.016-|Sample:13.64|
[TEST]
{'precision': array([0.01698896]), 'recall': array([0.04126263]), 'ndcg': array([0.03203444])}
EPOCH[771/1000] loss0.016-|Sample:13.47|
EPOCH[772/1000] loss0.015-|Sample:13.53|
EPOCH[773/1000] loss0.016-|Sample:13.40|
EPOCH[774/1000] loss0.016-|Sample:13.34|
EPOCH[775/1000] loss0.015-|Sample:13.70|
EPOCH[776/1000] loss0.016-|Sample:13.42|
EPOCH[777/1000] loss0.016-|Sample:13.54|
EPOCH[778/1000] loss0.016-|Sample:13.61|
EPOCH[779/1000] loss0.016-|Sample:13.56|
EPOCH[780/1000] loss0.016-|Sample:13.56|
[TEST]
{'precision': array([0.0170317]), 'recall': array([0.04129197]), 'ndcg': array([0.03193677])}
EPOCH[781/1000] loss0.016-|Sample:13.51|
EPOCH[782/1000] loss0.016-|Sample:13.42|
EPOCH[783/1000] loss0.016-|Sample:13.47|
EPOCH[784/1000] loss0.016-|Sample:13.43|
EPOCH[785/1000] loss0.016-|Sample:13.51|
EPOCH[786/1000] loss0.016-|Sample:13.61|
EPOCH[787/1000] loss0.015-|Sample:13.42|
EPOCH[788/1000] loss0.016-|Sample:13.53|
EPOCH[789/1000] loss0.016-|Sample:13.62|
EPOCH[790/1000] loss0.016-|Sample:13.45|
[TEST]
{'precision': array([0.01699941]), 'recall': array([0.04123307]), 'ndcg': array([0.03186093])}
EPOCH[791/1000] loss0.015-|Sample:13.61|
EPOCH[792/1000] loss0.016-|Sample:13.42|
EPOCH[793/1000] loss0.016-|Sample:13.57|
EPOCH[794/1000] loss0.016-|Sample:13.56|
EPOCH[795/1000] loss0.016-|Sample:13.61|
EPOCH[796/1000] loss0.016-|Sample:13.54|
EPOCH[797/1000] loss0.015-|Sample:13.62|
EPOCH[798/1000] loss0.015-|Sample:13.61|
EPOCH[799/1000] loss0.016-|Sample:13.64|
EPOCH[800/1000] loss0.016-|Sample:13.42|
[TEST]
{'precision': array([0.01691583]), 'recall': array([0.04114124]), 'ndcg': array([0.03183682])}
EPOCH[801/1000] loss0.016-|Sample:13.67|
EPOCH[802/1000] loss0.016-|Sample:13.54|
EPOCH[803/1000] loss0.016-|Sample:13.57|
EPOCH[804/1000] loss0.015-|Sample:13.53|
EPOCH[805/1000] loss0.016-|Sample:13.51|
EPOCH[806/1000] loss0.016-|Sample:13.56|
EPOCH[807/1000] loss0.016-|Sample:13.43|
EPOCH[808/1000] loss0.016-|Sample:13.53|
EPOCH[809/1000] loss0.016-|Sample:13.57|
EPOCH[810/1000] loss0.015-|Sample:13.45|
[TEST]
{'precision': array([0.01704975]), 'recall': array([0.04142325]), 'ndcg': array([0.03210643])}
EPOCH[811/1000] loss0.016-|Sample:13.59|
EPOCH[812/1000] loss0.016-|Sample:13.23|
EPOCH[813/1000] loss0.015-|Sample:13.57|
EPOCH[814/1000] loss0.016-|Sample:13.70|
EPOCH[815/1000] loss0.016-|Sample:13.56|
EPOCH[816/1000] loss0.016-|Sample:13.37|
EPOCH[817/1000] loss0.016-|Sample:13.76|
EPOCH[818/1000] loss0.016-|Sample:13.51|
EPOCH[819/1000] loss0.016-|Sample:13.54|
EPOCH[820/1000] loss0.016-|Sample:13.68|
[TEST]
{'precision': array([0.01708109]), 'recall': array([0.04145987]), 'ndcg': array([0.03207747])}
EPOCH[821/1000] loss0.016-|Sample:13.43|
EPOCH[822/1000] loss0.016-|Sample:13.54|
EPOCH[823/1000] loss0.015-|Sample:14.03|
EPOCH[824/1000] loss0.015-|Sample:13.47|
EPOCH[825/1000] loss0.016-|Sample:13.65|
EPOCH[826/1000] loss0.016-|Sample:13.42|
EPOCH[827/1000] loss0.016-|Sample:13.54|
EPOCH[828/1000] loss0.016-|Sample:13.67|
EPOCH[829/1000] loss0.016-|Sample:13.50|
EPOCH[830/1000] loss0.016-|Sample:13.64|
[TEST]
{'precision': array([0.01713808]), 'recall': array([0.0413938]), 'ndcg': array([0.03209788])}
EPOCH[831/1000] loss0.016-|Sample:13.54|
EPOCH[832/1000] loss0.016-|Sample:13.57|
EPOCH[833/1000] loss0.016-|Sample:13.57|
EPOCH[834/1000] loss0.016-|Sample:13.51|
EPOCH[835/1000] loss0.016-|Sample:13.56|
EPOCH[836/1000] loss0.015-|Sample:13.57|
EPOCH[837/1000] loss0.016-|Sample:13.43|
EPOCH[838/1000] loss0.016-|Sample:13.59|
EPOCH[839/1000] loss0.016-|Sample:13.59|
EPOCH[840/1000] loss0.015-|Sample:13.47|
[TEST]
{'precision': array([0.01700226]), 'recall': array([0.04115124]), 'ndcg': array([0.03189476])}
EPOCH[841/1000] loss0.016-|Sample:13.70|
EPOCH[842/1000] loss0.016-|Sample:13.42|
EPOCH[843/1000] loss0.016-|Sample:13.68|
EPOCH[844/1000] loss0.015-|Sample:13.65|
EPOCH[845/1000] loss0.016-|Sample:13.47|
EPOCH[846/1000] loss0.015-|Sample:13.51|
EPOCH[847/1000] loss0.015-|Sample:13.57|
EPOCH[848/1000] loss0.015-|Sample:13.57|
EPOCH[849/1000] loss0.016-|Sample:13.53|
EPOCH[850/1000] loss0.016-|Sample:13.47|
[TEST]
{'precision': array([0.01703075]), 'recall': array([0.04112303]), 'ndcg': array([0.03190627])}
EPOCH[851/1000] loss0.016-|Sample:13.50|
EPOCH[852/1000] loss0.016-|Sample:13.48|
EPOCH[853/1000] loss0.015-|Sample:13.65|
EPOCH[854/1000] loss0.015-|Sample:13.53|
EPOCH[855/1000] loss0.016-|Sample:13.29|
EPOCH[856/1000] loss0.015-|Sample:13.54|
EPOCH[857/1000] loss0.016-|Sample:13.42|
EPOCH[858/1000] loss0.015-|Sample:13.51|
EPOCH[859/1000] loss0.016-|Sample:13.61|
EPOCH[860/1000] loss0.016-|Sample:13.40|
[TEST]
{'precision': array([0.01711434]), 'recall': array([0.04141457]), 'ndcg': array([0.03209273])}
EPOCH[861/1000] loss0.016-|Sample:13.67|
EPOCH[862/1000] loss0.016-|Sample:13.43|
EPOCH[863/1000] loss0.016-|Sample:13.54|
EPOCH[864/1000] loss0.016-|Sample:13.57|
EPOCH[865/1000] loss0.015-|Sample:13.43|
EPOCH[866/1000] loss0.015-|Sample:13.56|
EPOCH[867/1000] loss0.016-|Sample:13.70|
EPOCH[868/1000] loss0.016-|Sample:13.47|
EPOCH[869/1000] loss0.015-|Sample:13.59|
EPOCH[870/1000] loss0.016-|Sample:13.56|
[TEST]
{'precision': array([0.01706115]), 'recall': array([0.04142519]), 'ndcg': array([0.03204813])}
EPOCH[871/1000] loss0.016-|Sample:13.45|
EPOCH[872/1000] loss0.015-|Sample:13.42|
EPOCH[873/1000] loss0.016-|Sample:13.64|
EPOCH[874/1000] loss0.016-|Sample:13.39|
EPOCH[875/1000] loss0.016-|Sample:13.59|
EPOCH[876/1000] loss0.015-|Sample:13.33|
EPOCH[877/1000] loss0.015-|Sample:13.47|
EPOCH[878/1000] loss0.016-|Sample:13.62|
EPOCH[879/1000] loss0.016-|Sample:13.48|
EPOCH[880/1000] loss0.016-|Sample:13.73|
[TEST]
{'precision': array([0.0170374]), 'recall': array([0.0414002]), 'ndcg': array([0.03203027])}
EPOCH[881/1000] loss0.016-|Sample:13.48|
EPOCH[882/1000] loss0.016-|Sample:13.51|
EPOCH[883/1000] loss0.015-|Sample:13.59|
EPOCH[884/1000] loss0.015-|Sample:13.50|
EPOCH[885/1000] loss0.015-|Sample:13.57|
EPOCH[886/1000] loss0.015-|Sample:13.57|
EPOCH[887/1000] loss0.016-|Sample:13.45|
EPOCH[888/1000] loss0.016-|Sample:13.61|
EPOCH[889/1000] loss0.015-|Sample:13.73|
EPOCH[890/1000] loss0.015-|Sample:13.43|
[TEST]
{'precision': array([0.01695857]), 'recall': array([0.04121325]), 'ndcg': array([0.03182826])}
EPOCH[891/1000] loss0.015-|Sample:13.59|
EPOCH[892/1000] loss0.015-|Sample:13.34|
EPOCH[893/1000] loss0.015-|Sample:13.50|
EPOCH[894/1000] loss0.016-|Sample:13.64|
EPOCH[895/1000] loss0.015-|Sample:13.43|
EPOCH[896/1000] loss0.015-|Sample:13.47|
EPOCH[897/1000] loss0.015-|Sample:13.51|
EPOCH[898/1000] loss0.015-|Sample:13.54|
EPOCH[899/1000] loss0.015-|Sample:13.51|
EPOCH[900/1000] loss0.015-|Sample:13.47|
[TEST]
{'precision': array([0.01701556]), 'recall': array([0.04130363]), 'ndcg': array([0.03193657])}
EPOCH[901/1000] loss0.015-|Sample:13.54|
EPOCH[902/1000] loss0.015-|Sample:13.45|
EPOCH[903/1000] loss0.015-|Sample:13.54|
EPOCH[904/1000] loss0.016-|Sample:13.43|
EPOCH[905/1000] loss0.015-|Sample:13.39|
EPOCH[906/1000] loss0.015-|Sample:13.54|
EPOCH[907/1000] loss0.015-|Sample:13.48|
EPOCH[908/1000] loss0.015-|Sample:13.50|
EPOCH[909/1000] loss0.015-|Sample:13.67|
EPOCH[910/1000] loss0.015-|Sample:13.47|
[TEST]
{'precision': array([0.01703455]), 'recall': array([0.0413417]), 'ndcg': array([0.03193461])}
EPOCH[911/1000] loss0.015-|Sample:13.61|
EPOCH[912/1000] loss0.016-|Sample:13.40|
EPOCH[913/1000] loss0.015-|Sample:13.65|
EPOCH[914/1000] loss0.015-|Sample:13.64|
EPOCH[915/1000] loss0.015-|Sample:13.50|
EPOCH[916/1000] loss0.015-|Sample:13.50|
EPOCH[917/1000] loss0.015-|Sample:14.03|
EPOCH[918/1000] loss0.016-|Sample:13.45|
EPOCH[919/1000] loss0.016-|Sample:13.56|
EPOCH[920/1000] loss0.015-|Sample:13.61|
[TEST]
{'precision': array([0.01710294]), 'recall': array([0.0415199]), 'ndcg': array([0.03198502])}
EPOCH[921/1000] loss0.016-|Sample:13.48|
EPOCH[922/1000] loss0.015-|Sample:13.59|
EPOCH[923/1000] loss0.015-|Sample:13.72|
EPOCH[924/1000] loss0.015-|Sample:13.45|
EPOCH[925/1000] loss0.015-|Sample:13.65|
EPOCH[926/1000] loss0.015-|Sample:13.43|
EPOCH[927/1000] loss0.016-|Sample:13.59|
EPOCH[928/1000] loss0.015-|Sample:13.64|
EPOCH[929/1000] loss0.015-|Sample:13.43|
EPOCH[930/1000] loss0.015-|Sample:13.56|
[TEST]
{'precision': array([0.01709249]), 'recall': array([0.04134122]), 'ndcg': array([0.03195472])}
EPOCH[931/1000] loss0.016-|Sample:13.51|
EPOCH[932/1000] loss0.015-|Sample:13.64|
EPOCH[933/1000] loss0.015-|Sample:13.34|
EPOCH[934/1000] loss0.015-|Sample:13.50|
EPOCH[935/1000] loss0.016-|Sample:13.61|
EPOCH[936/1000] loss0.015-|Sample:13.53|
EPOCH[937/1000] loss0.015-|Sample:13.51|
EPOCH[938/1000] loss0.016-|Sample:13.45|
EPOCH[939/1000] loss0.015-|Sample:13.70|
EPOCH[940/1000] loss0.015-|Sample:13.47|
[TEST]
{'precision': array([0.01714473]), 'recall': array([0.04157385]), 'ndcg': array([0.03207726])}
EPOCH[941/1000] loss0.016-|Sample:13.65|
EPOCH[942/1000] loss0.015-|Sample:13.42|
EPOCH[943/1000] loss0.015-|Sample:13.62|
EPOCH[944/1000] loss0.015-|Sample:13.47|
EPOCH[945/1000] loss0.015-|Sample:13.54|
EPOCH[946/1000] loss0.016-|Sample:13.53|
EPOCH[947/1000] loss0.016-|Sample:13.61|
EPOCH[948/1000] loss0.015-|Sample:13.57|
EPOCH[949/1000] loss0.016-|Sample:13.59|
EPOCH[950/1000] loss0.015-|Sample:13.39|
[TEST]
{'precision': array([0.01709819]), 'recall': array([0.04135961]), 'ndcg': array([0.03206076])}
EPOCH[951/1000] loss0.015-|Sample:13.57|
EPOCH[952/1000] loss0.016-|Sample:13.48|
EPOCH[953/1000] loss0.015-|Sample:13.62|
EPOCH[954/1000] loss0.015-|Sample:13.43|
EPOCH[955/1000] loss0.015-|Sample:13.54|
EPOCH[956/1000] loss0.015-|Sample:13.53|
EPOCH[957/1000] loss0.015-|Sample:13.40|
EPOCH[958/1000] loss0.016-|Sample:13.59|
EPOCH[959/1000] loss0.016-|Sample:13.62|
EPOCH[960/1000] loss0.015-|Sample:13.45|
[TEST]
{'precision': array([0.01713808]), 'recall': array([0.04152494]), 'ndcg': array([0.03225456])}
EPOCH[961/1000] loss0.015-|Sample:13.68|
EPOCH[962/1000] loss0.015-|Sample:13.43|
EPOCH[963/1000] loss0.016-|Sample:13.61|
EPOCH[964/1000] loss0.016-|Sample:13.73|
EPOCH[965/1000] loss0.016-|Sample:13.54|
EPOCH[966/1000] loss0.015-|Sample:13.50|
EPOCH[967/1000] loss0.016-|Sample:13.57|
EPOCH[968/1000] loss0.015-|Sample:13.47|
EPOCH[969/1000] loss0.015-|Sample:13.56|
EPOCH[970/1000] loss0.015-|Sample:13.65|
[TEST]
{'precision': array([0.01704405]), 'recall': array([0.04127412]), 'ndcg': array([0.03198147])}
EPOCH[971/1000] loss0.015-|Sample:13.48|
EPOCH[972/1000] loss0.015-|Sample:13.56|
EPOCH[973/1000] loss0.015-|Sample:13.65|
EPOCH[974/1000] loss0.015-|Sample:13.37|
EPOCH[975/1000] loss0.015-|Sample:13.70|
EPOCH[976/1000] loss0.015-|Sample:13.32|
EPOCH[977/1000] loss0.015-|Sample:13.59|
EPOCH[978/1000] loss0.015-|Sample:13.68|
EPOCH[979/1000] loss0.015-|Sample:13.54|
EPOCH[980/1000] loss0.015-|Sample:13.54|
[TEST]
{'precision': array([0.01713618]), 'recall': array([0.0414762]), 'ndcg': array([0.03211148])}
EPOCH[981/1000] loss0.015-|Sample:13.40|
EPOCH[982/1000] loss0.016-|Sample:13.59|
EPOCH[983/1000] loss0.015-|Sample:13.53|
EPOCH[984/1000] loss0.016-|Sample:13.39|
EPOCH[985/1000] loss0.015-|Sample:13.47|
EPOCH[986/1000] loss0.015-|Sample:13.54|
EPOCH[987/1000] loss0.015-|Sample:13.39|
EPOCH[988/1000] loss0.015-|Sample:13.51|
EPOCH[989/1000] loss0.015-|Sample:13.64|
EPOCH[990/1000] loss0.015-|Sample:13.33|
[TEST]
{'precision': array([0.01711814]), 'recall': array([0.04152752]), 'ndcg': array([0.03208819])}
EPOCH[991/1000] loss0.015-|Sample:13.53|
EPOCH[992/1000] loss0.016-|Sample:13.36|
EPOCH[993/1000] loss0.015-|Sample:13.53|
EPOCH[994/1000] loss0.016-|Sample:13.61|
EPOCH[995/1000] loss0.015-|Sample:13.89|
EPOCH[996/1000] loss0.016-|Sample:13.48|
EPOCH[997/1000] loss0.016-|Sample:13.64|
EPOCH[998/1000] loss0.015-|Sample:13.61|
EPOCH[999/1000] loss0.015-|Sample:13.57|
EPOCH[1000/1000] loss0.015-|Sample:13.39|

Process finished with exit code 0

model:MF layer:3
D:\ProgramFiles\Anaconda3\envs\image_caption_python36\python.exe D:/workspace/LightGcn/LightGCN-PyTorch-master/code/main.py
Cpp extension not loaded
>>SEED: 2020
loading [../data/amazon-book]
2380730 interactions for training
603382 interactions for testing
amazon-book Sparsity : 0.0006188476640083725
amazon-book is ready to go
===========config================
{'A_n_fold': 100,
 'A_split': False,
 'bigdata': False,
 'bpr_batch_size': 2048,
 'decay': 0.0001,
 'dropout': 0,
 'keep_prob': 0.6,
 'latent_dim_rec': 64,
 'lightGCN_n_layers': 3,
 'lr': 0.001,
 'multicore': 0,
 'pretrain': 0,
 'test_u_batch_size': 100}
cores for test: 6
comment: lgn
tensorboard: 1
LOAD: 0
Weight path: ./checkpoints
Test Topks: [20]
using bpr loss
===========end===================
using Normal distribution N(0,1) initialization for PureMF
load and save to /home/qhc/下载/LightGCN-PyTorch-master\code\checkpoints\mf-amazon-book-64.pth.tar
[TEST]
{'precision': array([0.00018521]), 'recall': array([0.0003439]), 'ndcg': array([0.00027584])}
EPOCH[1/1000] loss4.358-|Sample:16.65|
EPOCH[2/1000] loss3.931-|Sample:16.73|
EPOCH[3/1000] loss3.555-|Sample:16.82|
EPOCH[4/1000] loss3.207-|Sample:16.62|
EPOCH[5/1000] loss2.908-|Sample:17.18|
EPOCH[6/1000] loss2.642-|Sample:16.95|
EPOCH[7/1000] loss2.406-|Sample:16.92|
EPOCH[8/1000] loss2.185-|Sample:16.73|
EPOCH[9/1000] loss2.000-|Sample:17.12|
EPOCH[10/1000] loss1.827-|Sample:16.37|
[TEST]
{'precision': array([0.00010828]), 'recall': array([0.00022261]), 'ndcg': array([0.0001609])}
EPOCH[11/1000] loss1.678-|Sample:14.29|
EPOCH[12/1000] loss1.546-|Sample:15.18|
EPOCH[13/1000] loss1.416-|Sample:15.22|
EPOCH[14/1000] loss1.304-|Sample:14.48|
EPOCH[15/1000] loss1.203-|Sample:14.82|
EPOCH[16/1000] loss1.113-|Sample:15.45|
EPOCH[17/1000] loss1.029-|Sample:15.45|
EPOCH[18/1000] loss0.949-|Sample:15.44|
EPOCH[19/1000] loss0.876-|Sample:15.07|
EPOCH[20/1000] loss0.813-|Sample:14.79|
[TEST]
{'precision': array([0.00017096]), 'recall': array([0.00033474]), 'ndcg': array([0.00027928])}
EPOCH[21/1000] loss0.753-|Sample:14.81|
EPOCH[22/1000] loss0.699-|Sample:14.50|
EPOCH[23/1000] loss0.648-|Sample:14.84|
EPOCH[24/1000] loss0.599-|Sample:15.04|
EPOCH[25/1000] loss0.560-|Sample:14.17|
EPOCH[26/1000] loss0.521-|Sample:15.09|
EPOCH[27/1000] loss0.484-|Sample:14.72|
EPOCH[28/1000] loss0.450-|Sample:14.45|
EPOCH[29/1000] loss0.421-|Sample:14.57|
EPOCH[30/1000] loss0.394-|Sample:14.61|
[TEST]
{'precision': array([0.00059362]), 'recall': array([0.00100332]), 'ndcg': array([0.00084127])}
EPOCH[31/1000] loss0.369-|Sample:14.68|
EPOCH[32/1000] loss0.343-|Sample:14.61|
EPOCH[33/1000] loss0.322-|Sample:14.61|
EPOCH[34/1000] loss0.302-|Sample:14.62|
EPOCH[35/1000] loss0.284-|Sample:14.75|
EPOCH[36/1000] loss0.266-|Sample:14.47|
EPOCH[37/1000] loss0.250-|Sample:14.68|
EPOCH[38/1000] loss0.236-|Sample:14.72|
EPOCH[39/1000] loss0.222-|Sample:14.43|
EPOCH[40/1000] loss0.210-|Sample:14.70|
[TEST]
{'precision': array([0.00124898]), 'recall': array([0.0020309]), 'ndcg': array([0.00181388])}
EPOCH[41/1000] loss0.198-|Sample:14.67|
EPOCH[42/1000] loss0.187-|Sample:14.53|
EPOCH[43/1000] loss0.177-|Sample:14.92|
EPOCH[44/1000] loss0.167-|Sample:14.48|
EPOCH[45/1000] loss0.159-|Sample:14.93|
EPOCH[46/1000] loss0.151-|Sample:14.65|
EPOCH[47/1000] loss0.143-|Sample:14.36|
EPOCH[48/1000] loss0.137-|Sample:14.59|
EPOCH[49/1000] loss0.130-|Sample:14.72|
EPOCH[50/1000] loss0.124-|Sample:14.36|
[TEST]
{'precision': array([0.00174477]), 'recall': array([0.00270818]), 'ndcg': array([0.00252882])}
EPOCH[51/1000] loss0.118-|Sample:14.84|
EPOCH[52/1000] loss0.112-|Sample:14.26|
EPOCH[53/1000] loss0.108-|Sample:14.82|
EPOCH[54/1000] loss0.103-|Sample:14.68|
EPOCH[55/1000] loss0.099-|Sample:14.92|
EPOCH[56/1000] loss0.095-|Sample:14.01|
EPOCH[57/1000] loss0.091-|Sample:14.76|
EPOCH[58/1000] loss0.087-|Sample:14.78|
EPOCH[59/1000] loss0.084-|Sample:14.32|
EPOCH[60/1000] loss0.081-|Sample:14.86|
[TEST]
{'precision': array([0.00216743]), 'recall': array([0.00332985]), 'ndcg': array([0.00316102])}
EPOCH[61/1000] loss0.079-|Sample:14.31|
EPOCH[62/1000] loss0.076-|Sample:14.78|
EPOCH[63/1000] loss0.073-|Sample:14.62|
EPOCH[64/1000] loss0.070-|Sample:14.57|
EPOCH[65/1000] loss0.068-|Sample:14.62|
EPOCH[66/1000] loss0.066-|Sample:14.64|
EPOCH[67/1000] loss0.064-|Sample:14.45|
EPOCH[68/1000] loss0.062-|Sample:14.76|
EPOCH[69/1000] loss0.060-|Sample:14.67|
EPOCH[70/1000] loss0.059-|Sample:14.54|
[TEST]
{'precision': array([0.00246092]), 'recall': array([0.00376273]), 'ndcg': array([0.00354986])}
EPOCH[71/1000] loss0.057-|Sample:14.72|
EPOCH[72/1000] loss0.056-|Sample:14.25|
EPOCH[73/1000] loss0.054-|Sample:14.82|
EPOCH[74/1000] loss0.052-|Sample:14.65|
EPOCH[75/1000] loss0.051-|Sample:14.48|
EPOCH[76/1000] loss0.050-|Sample:14.72|
EPOCH[77/1000] loss0.050-|Sample:14.64|
EPOCH[78/1000] loss0.047-|Sample:14.65|
EPOCH[79/1000] loss0.047-|Sample:14.73|
EPOCH[80/1000] loss0.045-|Sample:14.36|
[TEST]
{'precision': array([0.00276295]), 'recall': array([0.00433682]), 'ndcg': array([0.00405484])}
EPOCH[81/1000] loss0.045-|Sample:14.84|
EPOCH[82/1000] loss0.044-|Sample:14.67|
EPOCH[83/1000] loss0.043-|Sample:14.67|
EPOCH[84/1000] loss0.042-|Sample:14.42|
EPOCH[85/1000] loss0.041-|Sample:14.73|
EPOCH[86/1000] loss0.040-|Sample:14.61|
EPOCH[87/1000] loss0.040-|Sample:14.51|
EPOCH[88/1000] loss0.039-|Sample:14.72|
EPOCH[89/1000] loss0.038-|Sample:14.57|
EPOCH[90/1000] loss0.038-|Sample:14.61|
[TEST]
{'precision': array([0.00298425]), 'recall': array([0.00485481]), 'ndcg': array([0.00442347])}
EPOCH[91/1000] loss0.037-|Sample:14.76|
EPOCH[92/1000] loss0.036-|Sample:14.25|
EPOCH[93/1000] loss0.036-|Sample:14.86|
EPOCH[94/1000] loss0.035-|Sample:14.78|
EPOCH[95/1000] loss0.034-|Sample:14.45|
EPOCH[96/1000] loss0.034-|Sample:14.68|
EPOCH[97/1000] loss0.034-|Sample:14.67|
EPOCH[98/1000] loss0.033-|Sample:14.53|
EPOCH[99/1000] loss0.033-|Sample:14.84|
EPOCH[100/1000] loss0.032-|Sample:14.56|
[TEST]
{'precision': array([0.00328439]), 'recall': array([0.00563267]), 'ndcg': array([0.00498571])}
EPOCH[101/1000] loss0.032-|Sample:14.67|
EPOCH[102/1000] loss0.031-|Sample:14.73|
EPOCH[103/1000] loss0.031-|Sample:14.84|
EPOCH[104/1000] loss0.030-|Sample:14.73|
EPOCH[105/1000] loss0.030-|Sample:14.68|
EPOCH[106/1000] loss0.030-|Sample:14.48|
EPOCH[107/1000] loss0.029-|Sample:14.87|
EPOCH[108/1000] loss0.029-|Sample:14.73|
EPOCH[109/1000] loss0.028-|Sample:14.64|
EPOCH[110/1000] loss0.028-|Sample:14.92|
[TEST]
{'precision': array([0.00357692]), 'recall': array([0.00644183]), 'ndcg': array([0.00551612])}
EPOCH[111/1000] loss0.028-|Sample:14.34|
EPOCH[112/1000] loss0.027-|Sample:14.81|
EPOCH[113/1000] loss0.027-|Sample:14.81|
EPOCH[114/1000] loss0.027-|Sample:14.26|
EPOCH[115/1000] loss0.026-|Sample:14.90|
EPOCH[116/1000] loss0.026-|Sample:14.86|
EPOCH[117/1000] loss0.026-|Sample:14.20|
EPOCH[118/1000] loss0.025-|Sample:14.87|
EPOCH[119/1000] loss0.025-|Sample:14.97|
EPOCH[120/1000] loss0.025-|Sample:14.17|
[TEST]
{'precision': array([0.003897]), 'recall': array([0.00728909]), 'ndcg': array([0.00612416])}
EPOCH[121/1000] loss0.025-|Sample:14.82|
EPOCH[122/1000] loss0.024-|Sample:14.25|
EPOCH[123/1000] loss0.025-|Sample:14.98|
EPOCH[124/1000] loss0.024-|Sample:14.92|
EPOCH[125/1000] loss0.024-|Sample:14.14|
EPOCH[126/1000] loss0.024-|Sample:14.79|
EPOCH[127/1000] loss0.023-|Sample:14.86|
EPOCH[128/1000] loss0.023-|Sample:14.17|
EPOCH[129/1000] loss0.023-|Sample:14.72|
EPOCH[130/1000] loss0.023-|Sample:14.62|
[TEST]
{'precision': array([0.00417624]), 'recall': array([0.00814016]), 'ndcg': array([0.00666418])}
EPOCH[131/1000] loss0.023-|Sample:14.81|
EPOCH[132/1000] loss0.022-|Sample:14.70|
EPOCH[133/1000] loss0.022-|Sample:14.07|
EPOCH[134/1000] loss0.022-|Sample:14.56|
EPOCH[135/1000] loss0.022-|Sample:14.84|
EPOCH[136/1000] loss0.022-|Sample:14.31|
EPOCH[137/1000] loss0.022-|Sample:14.68|
EPOCH[138/1000] loss0.021-|Sample:14.73|
EPOCH[139/1000] loss0.021-|Sample:14.73|
EPOCH[140/1000] loss0.021-|Sample:14.31|
[TEST]
{'precision': array([0.00457516]), 'recall': array([0.0091131]), 'ndcg': array([0.00747615])}
EPOCH[141/1000] loss0.021-|Sample:14.86|
EPOCH[142/1000] loss0.021-|Sample:14.22|
EPOCH[143/1000] loss0.021-|Sample:14.82|
EPOCH[144/1000] loss0.020-|Sample:14.90|
EPOCH[145/1000] loss0.020-|Sample:14.37|
EPOCH[146/1000] loss0.020-|Sample:14.87|
EPOCH[147/1000] loss0.020-|Sample:14.75|
EPOCH[148/1000] loss0.020-|Sample:14.50|
EPOCH[149/1000] loss0.020-|Sample:14.86|
EPOCH[150/1000] loss0.019-|Sample:14.67|
[TEST]
{'precision': array([0.00495223]), 'recall': array([0.01024547]), 'ndcg': array([0.00815396])}
EPOCH[151/1000] loss0.020-|Sample:14.72|
EPOCH[152/1000] loss0.019-|Sample:14.82|
EPOCH[153/1000] loss0.019-|Sample:14.50|
EPOCH[154/1000] loss0.019-|Sample:14.57|
EPOCH[155/1000] loss0.019-|Sample:14.98|
EPOCH[156/1000] loss0.019-|Sample:14.23|
EPOCH[157/1000] loss0.019-|Sample:14.95|
EPOCH[158/1000] loss0.018-|Sample:14.75|
EPOCH[159/1000] loss0.018-|Sample:14.65|
EPOCH[160/1000] loss0.018-|Sample:14.84|
[TEST]
{'precision': array([0.0052799]), 'recall': array([0.01115725]), 'ndcg': array([0.00879284])}
EPOCH[161/1000] loss0.018-|Sample:14.48|
EPOCH[162/1000] loss0.018-|Sample:14.73|
EPOCH[163/1000] loss0.018-|Sample:14.50|
EPOCH[164/1000] loss0.018-|Sample:14.57|
EPOCH[165/1000] loss0.018-|Sample:14.75|
EPOCH[166/1000] loss0.018-|Sample:14.81|
EPOCH[167/1000] loss0.018-|Sample:14.31|
EPOCH[168/1000] loss0.017-|Sample:14.84|
EPOCH[169/1000] loss0.017-|Sample:14.98|
EPOCH[170/1000] loss0.017-|Sample:14.17|
[TEST]
{'precision': array([0.00562088]), 'recall': array([0.01221127]), 'ndcg': array([0.00944782])}
EPOCH[171/1000] loss0.017-|Sample:14.89|
EPOCH[172/1000] loss0.017-|Sample:14.37|
EPOCH[173/1000] loss0.017-|Sample:14.78|
EPOCH[174/1000] loss0.017-|Sample:14.81|
EPOCH[175/1000] loss0.017-|Sample:14.26|
EPOCH[176/1000] loss0.016-|Sample:14.81|
EPOCH[177/1000] loss0.017-|Sample:14.86|
EPOCH[178/1000] loss0.016-|Sample:14.40|
EPOCH[179/1000] loss0.016-|Sample:14.89|
EPOCH[180/1000] loss0.016-|Sample:14.65|
[TEST]
{'precision': array([0.00594761]), 'recall': array([0.01307345]), 'ndcg': array([0.01025062])}
EPOCH[181/1000] loss0.016-|Sample:14.86|
EPOCH[182/1000] loss0.016-|Sample:14.72|
EPOCH[183/1000] loss0.016-|Sample:14.51|
EPOCH[184/1000] loss0.016-|Sample:14.98|
EPOCH[185/1000] loss0.016-|Sample:14.65|
EPOCH[186/1000] loss0.016-|Sample:14.37|
EPOCH[187/1000] loss0.016-|Sample:14.76|
EPOCH[188/1000] loss0.016-|Sample:14.76|
EPOCH[189/1000] loss0.016-|Sample:14.22|
EPOCH[190/1000] loss0.015-|Sample:14.72|
[TEST]
{'precision': array([0.00631138]), 'recall': array([0.01398754]), 'ndcg': array([0.01089123])}
EPOCH[191/1000] loss0.015-|Sample:14.31|
EPOCH[192/1000] loss0.015-|Sample:14.75|
EPOCH[193/1000] loss0.015-|Sample:14.79|
EPOCH[194/1000] loss0.015-|Sample:14.75|
EPOCH[195/1000] loss0.015-|Sample:14.45|
EPOCH[196/1000] loss0.015-|Sample:14.87|
EPOCH[197/1000] loss0.015-|Sample:14.82|
EPOCH[198/1000] loss0.015-|Sample:14.48|
EPOCH[199/1000] loss0.015-|Sample:14.89|
EPOCH[200/1000] loss0.015-|Sample:14.70|
[TEST]
{'precision': array([0.00656593]), 'recall': array([0.0147211]), 'ndcg': array([0.01143783])}
EPOCH[201/1000] loss0.015-|Sample:14.75|
EPOCH[202/1000] loss0.015-|Sample:14.76|
EPOCH[203/1000] loss0.014-|Sample:14.48|
EPOCH[204/1000] loss0.014-|Sample:14.62|
EPOCH[205/1000] loss0.015-|Sample:14.73|
EPOCH[206/1000] loss0.014-|Sample:14.34|
EPOCH[207/1000] loss0.014-|Sample:14.86|
EPOCH[208/1000] loss0.014-|Sample:14.93|
EPOCH[209/1000] loss0.014-|Sample:14.48|
EPOCH[210/1000] loss0.014-|Sample:14.90|
[TEST]
{'precision': array([0.0068917]), 'recall': array([0.01558904]), 'ndcg': array([0.01212422])}
EPOCH[211/1000] loss0.014-|Sample:14.62|
EPOCH[212/1000] loss0.014-|Sample:14.82|
EPOCH[213/1000] loss0.014-|Sample:14.61|
EPOCH[214/1000] loss0.014-|Sample:14.62|
EPOCH[215/1000] loss0.014-|Sample:14.75|
EPOCH[216/1000] loss0.014-|Sample:14.56|
EPOCH[217/1000] loss0.014-|Sample:14.56|
EPOCH[218/1000] loss0.014-|Sample:14.86|
EPOCH[219/1000] loss0.013-|Sample:14.36|
EPOCH[220/1000] loss0.013-|Sample:14.86|
[TEST]
{'precision': array([0.00716525]), 'recall': array([0.01629046]), 'ndcg': array([0.01270843])}
EPOCH[221/1000] loss0.013-|Sample:14.89|
EPOCH[222/1000] loss0.013-|Sample:14.18|
EPOCH[223/1000] loss0.013-|Sample:14.78|
EPOCH[224/1000] loss0.013-|Sample:14.70|
EPOCH[225/1000] loss0.013-|Sample:14.29|
EPOCH[226/1000] loss0.013-|Sample:14.68|
EPOCH[227/1000] loss0.013-|Sample:14.76|
EPOCH[228/1000] loss0.013-|Sample:14.32|
EPOCH[229/1000] loss0.013-|Sample:14.86|
EPOCH[230/1000] loss0.013-|Sample:14.67|
[TEST]
{'precision': array([0.00747203]), 'recall': array([0.01708772]), 'ndcg': array([0.01317197])}
EPOCH[231/1000] loss0.013-|Sample:15.03|
EPOCH[232/1000] loss0.013-|Sample:14.67|
EPOCH[233/1000] loss0.013-|Sample:14.45|
EPOCH[234/1000] loss0.013-|Sample:14.70|
EPOCH[235/1000] loss0.013-|Sample:14.75|
EPOCH[236/1000] loss0.013-|Sample:14.32|
EPOCH[237/1000] loss0.013-|Sample:14.68|
EPOCH[238/1000] loss0.013-|Sample:14.70|
EPOCH[239/1000] loss0.013-|Sample:14.20|
EPOCH[240/1000] loss0.012-|Sample:14.68|
[TEST]
{'precision': array([0.0078187]), 'recall': array([0.01788803]), 'ndcg': array([0.01383486])}
EPOCH[241/1000] loss0.012-|Sample:14.25|
EPOCH[242/1000] loss0.012-|Sample:14.61|
EPOCH[243/1000] loss0.012-|Sample:14.79|
EPOCH[244/1000] loss0.012-|Sample:14.37|
EPOCH[245/1000] loss0.012-|Sample:14.67|
EPOCH[246/1000] loss0.012-|Sample:14.68|
EPOCH[247/1000] loss0.012-|Sample:14.48|
EPOCH[248/1000] loss0.012-|Sample:14.68|
EPOCH[249/1000] loss0.012-|Sample:14.79|
EPOCH[250/1000] loss0.012-|Sample:14.65|
[TEST]
{'precision': array([0.00799157]), 'recall': array([0.01827664]), 'ndcg': array([0.01424446])}
EPOCH[251/1000] loss0.012-|Sample:14.72|
EPOCH[252/1000] loss0.012-|Sample:14.81|
EPOCH[253/1000] loss0.012-|Sample:14.40|
EPOCH[254/1000] loss0.012-|Sample:14.67|
EPOCH[255/1000] loss0.012-|Sample:14.78|
EPOCH[256/1000] loss0.012-|Sample:14.28|
EPOCH[257/1000] loss0.012-|Sample:14.79|
EPOCH[258/1000] loss0.012-|Sample:14.89|
EPOCH[259/1000] loss0.012-|Sample:14.54|
EPOCH[260/1000] loss0.012-|Sample:15.03|
[TEST]
{'precision': array([0.00823661]), 'recall': array([0.01880041]), 'ndcg': array([0.01460305])}
EPOCH[261/1000] loss0.012-|Sample:14.65|
EPOCH[262/1000] loss0.012-|Sample:14.92|
EPOCH[263/1000] loss0.012-|Sample:14.59|
EPOCH[264/1000] loss0.011-|Sample:14.64|
EPOCH[265/1000] loss0.011-|Sample:14.84|
EPOCH[266/1000] loss0.012-|Sample:14.59|
EPOCH[267/1000] loss0.011-|Sample:14.70|
EPOCH[268/1000] loss0.011-|Sample:15.00|
EPOCH[269/1000] loss0.011-|Sample:14.57|
EPOCH[270/1000] loss0.011-|Sample:14.86|
[TEST]
{'precision': array([0.00848451]), 'recall': array([0.01950767]), 'ndcg': array([0.01508186])}
EPOCH[271/1000] loss0.011-|Sample:14.73|
EPOCH[272/1000] loss0.011-|Sample:14.51|
EPOCH[273/1000] loss0.011-|Sample:14.92|
EPOCH[274/1000] loss0.011-|Sample:14.47|
EPOCH[275/1000] loss0.011-|Sample:14.78|
EPOCH[276/1000] loss0.011-|Sample:14.75|
EPOCH[277/1000] loss0.011-|Sample:14.79|
EPOCH[278/1000] loss0.011-|Sample:14.25|
EPOCH[279/1000] loss0.011-|Sample:14.81|
EPOCH[280/1000] loss0.011-|Sample:14.73|
[TEST]
{'precision': array([0.0085282]), 'recall': array([0.01976562]), 'ndcg': array([0.01516342])}
EPOCH[281/1000] loss0.011-|Sample:15.01|
EPOCH[282/1000] loss0.011-|Sample:14.82|
EPOCH[283/1000] loss0.011-|Sample:14.32|
EPOCH[284/1000] loss0.011-|Sample:14.86|
EPOCH[285/1000] loss0.011-|Sample:14.73|
EPOCH[286/1000] loss0.011-|Sample:14.07|
EPOCH[287/1000] loss0.011-|Sample:14.79|
EPOCH[288/1000] loss0.011-|Sample:14.78|
EPOCH[289/1000] loss0.011-|Sample:14.36|
EPOCH[290/1000] loss0.011-|Sample:14.86|
[TEST]
{'precision': array([0.00888817]), 'recall': array([0.02062747]), 'ndcg': array([0.01594591])}
EPOCH[291/1000] loss0.011-|Sample:14.70|
EPOCH[292/1000] loss0.011-|Sample:14.59|
EPOCH[293/1000] loss0.011-|Sample:14.89|
EPOCH[294/1000] loss0.011-|Sample:14.51|
EPOCH[295/1000] loss0.011-|Sample:14.67|
EPOCH[296/1000] loss0.011-|Sample:14.61|
EPOCH[297/1000] loss0.011-|Sample:14.67|
EPOCH[298/1000] loss0.011-|Sample:14.73|
EPOCH[299/1000] loss0.011-|Sample:14.53|
EPOCH[300/1000] loss0.010-|Sample:14.68|
[TEST]
{'precision': array([0.00896036]), 'recall': array([0.02097182]), 'ndcg': array([0.01617426])}
EPOCH[301/1000] loss0.011-|Sample:14.73|
EPOCH[302/1000] loss0.010-|Sample:14.62|
EPOCH[303/1000] loss0.011-|Sample:14.92|
EPOCH[304/1000] loss0.010-|Sample:14.82|
EPOCH[305/1000] loss0.010-|Sample:14.62|
EPOCH[306/1000] loss0.010-|Sample:14.56|
EPOCH[307/1000] loss0.010-|Sample:14.95|
EPOCH[308/1000] loss0.010-|Sample:14.47|
EPOCH[309/1000] loss0.010-|Sample:14.64|
EPOCH[310/1000] loss0.010-|Sample:14.90|
[TEST]
{'precision': array([0.00924054]), 'recall': array([0.02173726]), 'ndcg': array([0.01675876])}
EPOCH[311/1000] loss0.010-|Sample:14.68|
EPOCH[312/1000] loss0.010-|Sample:14.97|
EPOCH[313/1000] loss0.010-|Sample:14.42|
EPOCH[314/1000] loss0.010-|Sample:14.70|
EPOCH[315/1000] loss0.010-|Sample:14.86|
EPOCH[316/1000] loss0.010-|Sample:14.43|
EPOCH[317/1000] loss0.010-|Sample:14.73|
EPOCH[318/1000] loss0.010-|Sample:14.82|
EPOCH[319/1000] loss0.010-|Sample:14.39|
EPOCH[320/1000] loss0.010-|Sample:14.93|
[TEST]
{'precision': array([0.00941816]), 'recall': array([0.02213575]), 'ndcg': array([0.01720552])}
EPOCH[321/1000] loss0.010-|Sample:14.12|
EPOCH[322/1000] loss0.010-|Sample:14.68|
EPOCH[323/1000] loss0.010-|Sample:14.84|
EPOCH[324/1000] loss0.010-|Sample:14.26|
EPOCH[325/1000] loss0.010-|Sample:14.97|
EPOCH[326/1000] loss0.010-|Sample:14.72|
EPOCH[327/1000] loss0.010-|Sample:14.29|
EPOCH[328/1000] loss0.010-|Sample:14.78|
EPOCH[329/1000] loss0.010-|Sample:14.76|
EPOCH[330/1000] loss0.010-|Sample:14.34|
[TEST]
{'precision': array([0.00950839]), 'recall': array([0.0224212]), 'ndcg': array([0.0172032])}
EPOCH[331/1000] loss0.010-|Sample:14.79|
EPOCH[332/1000] loss0.010-|Sample:14.92|
EPOCH[333/1000] loss0.010-|Sample:14.57|
EPOCH[334/1000] loss0.010-|Sample:14.86|
EPOCH[335/1000] loss0.010-|Sample:14.72|
EPOCH[336/1000] loss0.010-|Sample:14.45|
EPOCH[337/1000] loss0.010-|Sample:14.73|
EPOCH[338/1000] loss0.010-|Sample:14.62|
EPOCH[339/1000] loss0.010-|Sample:14.90|
EPOCH[340/1000] loss0.010-|Sample:14.76|
[TEST]
{'precision': array([0.00962711]), 'recall': array([0.02274123]), 'ndcg': array([0.0174768])}
EPOCH[341/1000] loss0.010-|Sample:14.73|
EPOCH[342/1000] loss0.010-|Sample:14.64|
EPOCH[343/1000] loss0.010-|Sample:14.57|
EPOCH[344/1000] loss0.010-|Sample:14.75|
EPOCH[345/1000] loss0.010-|Sample:14.81|
EPOCH[346/1000] loss0.010-|Sample:14.39|
EPOCH[347/1000] loss0.010-|Sample:14.95|
EPOCH[348/1000] loss0.010-|Sample:14.72|
EPOCH[349/1000] loss0.010-|Sample:14.51|
EPOCH[350/1000] loss0.010-|Sample:15.03|
[TEST]
{'precision': array([0.00978288]), 'recall': array([0.02326801]), 'ndcg': array([0.01790505])}
EPOCH[351/1000] loss0.010-|Sample:14.56|
EPOCH[352/1000] loss0.010-|Sample:14.68|
EPOCH[353/1000] loss0.010-|Sample:14.95|
EPOCH[354/1000] loss0.009-|Sample:14.37|
EPOCH[355/1000] loss0.010-|Sample:15.01|
EPOCH[356/1000] loss0.009-|Sample:14.72|
EPOCH[357/1000] loss0.009-|Sample:14.34|
EPOCH[358/1000] loss0.009-|Sample:14.90|
EPOCH[359/1000] loss0.009-|Sample:14.67|
EPOCH[360/1000] loss0.010-|Sample:15.03|
[TEST]
{'precision': array([0.01010676]), 'recall': array([0.02389617]), 'ndcg': array([0.01836159])}
EPOCH[361/1000] loss0.010-|Sample:14.76|
EPOCH[362/1000] loss0.009-|Sample:14.79|
EPOCH[363/1000] loss0.009-|Sample:14.20|
EPOCH[364/1000] loss0.009-|Sample:14.79|
EPOCH[365/1000] loss0.009-|Sample:14.92|
EPOCH[366/1000] loss0.009-|Sample:14.18|
EPOCH[367/1000] loss0.009-|Sample:14.72|
EPOCH[368/1000] loss0.009-|Sample:14.76|
EPOCH[369/1000] loss0.009-|Sample:14.56|
EPOCH[370/1000] loss0.009-|Sample:14.65|
[TEST]
{'precision': array([0.01011056]), 'recall': array([0.02396272]), 'ndcg': array([0.01839918])}
EPOCH[371/1000] loss0.009-|Sample:14.72|
EPOCH[372/1000] loss0.009-|Sample:14.78|
EPOCH[373/1000] loss0.009-|Sample:14.68|
EPOCH[374/1000] loss0.009-|Sample:14.90|
EPOCH[375/1000] loss0.009-|Sample:14.78|
EPOCH[376/1000] loss0.009-|Sample:14.75|
EPOCH[377/1000] loss0.009-|Sample:14.75|
EPOCH[378/1000] loss0.009-|Sample:14.82|
EPOCH[379/1000] loss0.009-|Sample:14.50|
EPOCH[380/1000] loss0.009-|Sample:14.61|
[TEST]
{'precision': array([0.01027202]), 'recall': array([0.02440298]), 'ndcg': array([0.01877111])}
EPOCH[381/1000] loss0.009-|Sample:14.75|
EPOCH[382/1000] loss0.009-|Sample:14.47|
EPOCH[383/1000] loss0.009-|Sample:14.92|
EPOCH[384/1000] loss0.009-|Sample:14.51|
EPOCH[385/1000] loss0.009-|Sample:14.56|
EPOCH[386/1000] loss0.009-|Sample:14.75|
EPOCH[387/1000] loss0.009-|Sample:14.76|
EPOCH[388/1000] loss0.009-|Sample:14.34|
EPOCH[389/1000] loss0.009-|Sample:14.79|
EPOCH[390/1000] loss0.009-|Sample:14.51|
[TEST]
{'precision': array([0.01042874]), 'recall': array([0.02485027]), 'ndcg': array([0.01906559])}
EPOCH[391/1000] loss0.009-|Sample:14.78|
EPOCH[392/1000] loss0.009-|Sample:14.73|
EPOCH[393/1000] loss0.009-|Sample:14.43|
EPOCH[394/1000] loss0.009-|Sample:14.87|
EPOCH[395/1000] loss0.009-|Sample:14.93|
EPOCH[396/1000] loss0.009-|Sample:14.28|
EPOCH[397/1000] loss0.009-|Sample:15.01|
EPOCH[398/1000] loss0.009-|Sample:14.68|
EPOCH[399/1000] loss0.009-|Sample:14.20|
EPOCH[400/1000] loss0.009-|Sample:14.93|
[TEST]
{'precision': array([0.01050947]), 'recall': array([0.0251729]), 'ndcg': array([0.01936529])}
EPOCH[401/1000] loss0.009-|Sample:14.40|
EPOCH[402/1000] loss0.009-|Sample:14.76|
EPOCH[403/1000] loss0.009-|Sample:14.93|
EPOCH[404/1000] loss0.009-|Sample:14.11|
EPOCH[405/1000] loss0.009-|Sample:15.06|
EPOCH[406/1000] loss0.009-|Sample:14.64|
EPOCH[407/1000] loss0.009-|Sample:14.23|
EPOCH[408/1000] loss0.009-|Sample:14.86|
EPOCH[409/1000] loss0.009-|Sample:14.95|
EPOCH[410/1000] loss0.009-|Sample:14.50|
[TEST]
{'precision': array([0.01073267]), 'recall': array([0.02558851]), 'ndcg': array([0.01959018])}
EPOCH[411/1000] loss0.009-|Sample:14.67|
EPOCH[412/1000] loss0.009-|Sample:14.32|
EPOCH[413/1000] loss0.009-|Sample:14.75|
EPOCH[414/1000] loss0.009-|Sample:14.75|
EPOCH[415/1000] loss0.009-|Sample:14.93|
EPOCH[416/1000] loss0.009-|Sample:14.84|
EPOCH[417/1000] loss0.009-|Sample:14.67|
EPOCH[418/1000] loss0.009-|Sample:14.64|
EPOCH[419/1000] loss0.009-|Sample:14.59|
EPOCH[420/1000] loss0.009-|Sample:14.76|
[TEST]
{'precision': array([0.01074597]), 'recall': array([0.02566287]), 'ndcg': array([0.01966185])}
EPOCH[421/1000] loss0.009-|Sample:14.78|
EPOCH[422/1000] loss0.009-|Sample:14.61|
EPOCH[423/1000] loss0.009-|Sample:14.56|
EPOCH[424/1000] loss0.009-|Sample:14.79|
EPOCH[425/1000] loss0.009-|Sample:15.07|
EPOCH[426/1000] loss0.009-|Sample:14.22|
EPOCH[427/1000] loss0.009-|Sample:14.78|
EPOCH[428/1000] loss0.009-|Sample:14.82|
EPOCH[429/1000] loss0.009-|Sample:14.31|
EPOCH[430/1000] loss0.009-|Sample:14.67|
[TEST]
{'precision': array([0.01097392]), 'recall': array([0.02628727]), 'ndcg': array([0.02014178])}
EPOCH[431/1000] loss0.009-|Sample:14.61|
EPOCH[432/1000] loss0.009-|Sample:14.72|
EPOCH[433/1000] loss0.009-|Sample:15.04|
EPOCH[434/1000] loss0.009-|Sample:14.37|
EPOCH[435/1000] loss0.009-|Sample:14.75|
EPOCH[436/1000] loss0.009-|Sample:14.81|
EPOCH[437/1000] loss0.009-|Sample:14.29|
EPOCH[438/1000] loss0.009-|Sample:14.81|
EPOCH[439/1000] loss0.009-|Sample:15.00|
EPOCH[440/1000] loss0.009-|Sample:14.15|
[TEST]
{'precision': array([0.01106605]), 'recall': array([0.02659372]), 'ndcg': array([0.02028327])}
EPOCH[441/1000] loss0.009-|Sample:14.98|
EPOCH[442/1000] loss0.009-|Sample:14.62|
EPOCH[443/1000] loss0.009-|Sample:14.15|
EPOCH[444/1000] loss0.009-|Sample:14.84|
EPOCH[445/1000] loss0.008-|Sample:14.75|
EPOCH[446/1000] loss0.009-|Sample:14.04|
EPOCH[447/1000] loss0.009-|Sample:14.95|
EPOCH[448/1000] loss0.009-|Sample:14.76|
EPOCH[449/1000] loss0.009-|Sample:14.14|
EPOCH[450/1000] loss0.009-|Sample:14.81|
[TEST]
{'precision': array([0.01108694]), 'recall': array([0.02688297]), 'ndcg': array([0.02052982])}
EPOCH[451/1000] loss0.008-|Sample:14.26|
EPOCH[452/1000] loss0.008-|Sample:14.87|
EPOCH[453/1000] loss0.009-|Sample:14.87|
EPOCH[454/1000] loss0.008-|Sample:14.34|
EPOCH[455/1000] loss0.009-|Sample:14.81|
EPOCH[456/1000] loss0.008-|Sample:14.67|
EPOCH[457/1000] loss0.009-|Sample:14.67|
EPOCH[458/1000] loss0.008-|Sample:14.81|
EPOCH[459/1000] loss0.009-|Sample:14.37|
EPOCH[460/1000] loss0.009-|Sample:14.70|
[TEST]
{'precision': array([0.01117148]), 'recall': array([0.02702392]), 'ndcg': array([0.02076581])}
EPOCH[461/1000] loss0.008-|Sample:14.61|
EPOCH[462/1000] loss0.008-|Sample:14.59|
EPOCH[463/1000] loss0.008-|Sample:14.86|
EPOCH[464/1000] loss0.008-|Sample:14.61|
EPOCH[465/1000] loss0.008-|Sample:14.72|
EPOCH[466/1000] loss0.009-|Sample:14.86|
EPOCH[467/1000] loss0.008-|Sample:14.39|
EPOCH[468/1000] loss0.008-|Sample:14.65|
EPOCH[469/1000] loss0.008-|Sample:14.89|
EPOCH[470/1000] loss0.008-|Sample:14.61|
[TEST]
{'precision': array([0.01131584]), 'recall': array([0.02727659]), 'ndcg': array([0.02073325])}
EPOCH[471/1000] loss0.008-|Sample:14.84|
EPOCH[472/1000] loss0.008-|Sample:14.72|
EPOCH[473/1000] loss0.008-|Sample:14.50|
EPOCH[474/1000] loss0.008-|Sample:14.82|
EPOCH[475/1000] loss0.008-|Sample:14.81|
EPOCH[476/1000] loss0.008-|Sample:14.32|
EPOCH[477/1000] loss0.008-|Sample:14.97|
EPOCH[478/1000] loss0.008-|Sample:14.79|
EPOCH[479/1000] loss0.008-|Sample:14.43|
EPOCH[480/1000] loss0.008-|Sample:14.73|
[TEST]
{'precision': array([0.01136428]), 'recall': array([0.02747252]), 'ndcg': array([0.02099153])}
EPOCH[481/1000] loss0.008-|Sample:14.43|
EPOCH[482/1000] loss0.008-|Sample:14.76|
EPOCH[483/1000] loss0.008-|Sample:14.87|
EPOCH[484/1000] loss0.008-|Sample:14.23|
EPOCH[485/1000] loss0.008-|Sample:14.78|
EPOCH[486/1000] loss0.008-|Sample:14.78|
EPOCH[487/1000] loss0.008-|Sample:14.07|
EPOCH[488/1000] loss0.008-|Sample:14.68|
EPOCH[489/1000] loss0.008-|Sample:14.95|
EPOCH[490/1000] loss0.008-|Sample:13.92|
[TEST]
{'precision': array([0.01149726]), 'recall': array([0.02785714]), 'ndcg': array([0.02127764])}
EPOCH[491/1000] loss0.008-|Sample:14.87|
EPOCH[492/1000] loss0.008-|Sample:14.14|
EPOCH[493/1000] loss0.008-|Sample:14.82|
EPOCH[494/1000] loss0.008-|Sample:14.86|
EPOCH[495/1000] loss0.008-|Sample:14.17|
EPOCH[496/1000] loss0.008-|Sample:14.73|
EPOCH[497/1000] loss0.008-|Sample:14.73|
EPOCH[498/1000] loss0.008-|Sample:14.51|
EPOCH[499/1000] loss0.008-|Sample:14.51|
EPOCH[500/1000] loss0.008-|Sample:14.73|
[TEST]
{'precision': array([0.01161408]), 'recall': array([0.02828951]), 'ndcg': array([0.02141565])}
EPOCH[501/1000] loss0.008-|Sample:14.61|
EPOCH[502/1000] loss0.008-|Sample:14.72|
EPOCH[503/1000] loss0.008-|Sample:14.68|
EPOCH[504/1000] loss0.008-|Sample:14.56|
EPOCH[505/1000] loss0.008-|Sample:15.01|
EPOCH[506/1000] loss0.008-|Sample:14.32|
EPOCH[507/1000] loss0.008-|Sample:14.68|
EPOCH[508/1000] loss0.008-|Sample:14.89|
EPOCH[509/1000] loss0.008-|Sample:14.14|
EPOCH[510/1000] loss0.008-|Sample:14.81|
[TEST]
{'precision': array([0.01155709]), 'recall': array([0.02810733]), 'ndcg': array([0.02131469])}
EPOCH[511/1000] loss0.008-|Sample:14.47|
EPOCH[512/1000] loss0.008-|Sample:14.73|
EPOCH[513/1000] loss0.008-|Sample:14.73|
EPOCH[514/1000] loss0.008-|Sample:14.47|
EPOCH[515/1000] loss0.008-|Sample:14.86|
EPOCH[516/1000] loss0.008-|Sample:14.76|
EPOCH[517/1000] loss0.008-|Sample:14.23|
EPOCH[518/1000] loss0.008-|Sample:15.01|
EPOCH[519/1000] loss0.008-|Sample:14.86|
EPOCH[520/1000] loss0.008-|Sample:14.14|
[TEST]
{'precision': array([0.01174325]), 'recall': array([0.02828109]), 'ndcg': array([0.0215288])}
EPOCH[521/1000] loss0.008-|Sample:14.89|
EPOCH[522/1000] loss0.008-|Sample:14.37|
EPOCH[523/1000] loss0.008-|Sample:14.81|
EPOCH[524/1000] loss0.008-|Sample:14.92|
EPOCH[525/1000] loss0.008-|Sample:14.78|
EPOCH[526/1000] loss0.008-|Sample:14.14|
EPOCH[527/1000] loss0.008-|Sample:14.78|
EPOCH[528/1000] loss0.008-|Sample:14.75|
EPOCH[529/1000] loss0.008-|Sample:14.11|
EPOCH[530/1000] loss0.008-|Sample:14.68|
[TEST]
{'precision': array([0.0117689]), 'recall': array([0.02850973]), 'ndcg': array([0.02166375])}
EPOCH[531/1000] loss0.008-|Sample:14.25|
EPOCH[532/1000] loss0.008-|Sample:14.70|
EPOCH[533/1000] loss0.008-|Sample:14.93|
EPOCH[534/1000] loss0.008-|Sample:14.20|
EPOCH[535/1000] loss0.008-|Sample:14.68|
EPOCH[536/1000] loss0.008-|Sample:14.78|
EPOCH[537/1000] loss0.008-|Sample:14.45|
EPOCH[538/1000] loss0.008-|Sample:14.76|
EPOCH[539/1000] loss0.008-|Sample:14.62|
EPOCH[540/1000] loss0.008-|Sample:14.59|
[TEST]
{'precision': array([0.01180309]), 'recall': array([0.02872701]), 'ndcg': array([0.02189525])}
EPOCH[541/1000] loss0.008-|Sample:14.84|
EPOCH[542/1000] loss0.008-|Sample:14.25|
EPOCH[543/1000] loss0.008-|Sample:14.76|
EPOCH[544/1000] loss0.008-|Sample:14.75|
EPOCH[545/1000] loss0.008-|Sample:14.43|
EPOCH[546/1000] loss0.008-|Sample:14.73|
EPOCH[547/1000] loss0.008-|Sample:14.81|
EPOCH[548/1000] loss0.008-|Sample:14.42|
EPOCH[549/1000] loss0.008-|Sample:14.78|
EPOCH[550/1000] loss0.008-|Sample:14.47|
[TEST]
{'precision': array([0.01184013]), 'recall': array([0.02867983]), 'ndcg': array([0.02181456])}
EPOCH[551/1000] loss0.008-|Sample:14.61|
EPOCH[552/1000] loss0.008-|Sample:14.76|
EPOCH[553/1000] loss0.008-|Sample:14.93|
EPOCH[554/1000] loss0.008-|Sample:14.25|
EPOCH[555/1000] loss0.008-|Sample:14.89|
EPOCH[556/1000] loss0.008-|Sample:14.62|
EPOCH[557/1000] loss0.008-|Sample:14.53|
EPOCH[558/1000] loss0.008-|Sample:14.84|
EPOCH[559/1000] loss0.008-|Sample:14.51|
EPOCH[560/1000] loss0.008-|Sample:14.86|
[TEST]
{'precision': array([0.01197215]), 'recall': array([0.02903356]), 'ndcg': array([0.022093])}
EPOCH[561/1000] loss0.008-|Sample:14.53|
EPOCH[562/1000] loss0.008-|Sample:14.42|
EPOCH[563/1000] loss0.008-|Sample:14.76|
EPOCH[564/1000] loss0.008-|Sample:14.72|
EPOCH[565/1000] loss0.008-|Sample:14.59|
EPOCH[566/1000] loss0.008-|Sample:14.86|
EPOCH[567/1000] loss0.008-|Sample:14.47|
EPOCH[568/1000] loss0.008-|Sample:14.75|
EPOCH[569/1000] loss0.008-|Sample:15.12|
EPOCH[570/1000] loss0.008-|Sample:14.36|
[TEST]
{'precision': array([0.01198925]), 'recall': array([0.02896291]), 'ndcg': array([0.02217388])}
EPOCH[571/1000] loss0.008-|Sample:14.72|
EPOCH[572/1000] loss0.008-|Sample:14.68|
EPOCH[573/1000] loss0.008-|Sample:14.59|
EPOCH[574/1000] loss0.008-|Sample:14.82|
EPOCH[575/1000] loss0.008-|Sample:14.56|
EPOCH[576/1000] loss0.008-|Sample:14.45|
EPOCH[577/1000] loss0.008-|Sample:14.98|
EPOCH[578/1000] loss0.008-|Sample:14.51|
EPOCH[579/1000] loss0.008-|Sample:14.64|
EPOCH[580/1000] loss0.008-|Sample:14.64|
[TEST]
{'precision': array([0.01211937]), 'recall': array([0.02944114]), 'ndcg': array([0.0221995])}
EPOCH[581/1000] loss0.008-|Sample:14.50|
EPOCH[582/1000] loss0.008-|Sample:14.64|
EPOCH[583/1000] loss0.008-|Sample:15.06|
EPOCH[584/1000] loss0.008-|Sample:14.32|
EPOCH[585/1000] loss0.008-|Sample:14.61|
EPOCH[586/1000] loss0.008-|Sample:14.79|
EPOCH[587/1000] loss0.008-|Sample:14.23|
EPOCH[588/1000] loss0.008-|Sample:14.82|
EPOCH[589/1000] loss0.008-|Sample:14.89|
EPOCH[590/1000] loss0.008-|Sample:14.09|
[TEST]
{'precision': array([0.0121944]), 'recall': array([0.02959777]), 'ndcg': array([0.02242779])}
EPOCH[591/1000] loss0.008-|Sample:14.79|
EPOCH[592/1000] loss0.008-|Sample:14.28|
EPOCH[593/1000] loss0.008-|Sample:14.81|
EPOCH[594/1000] loss0.008-|Sample:14.87|
EPOCH[595/1000] loss0.008-|Sample:14.36|
EPOCH[596/1000] loss0.008-|Sample:14.84|
EPOCH[597/1000] loss0.008-|Sample:15.06|
EPOCH[598/1000] loss0.008-|Sample:14.22|
EPOCH[599/1000] loss0.008-|Sample:14.76|
EPOCH[600/1000] loss0.008-|Sample:14.79|
[TEST]
{'precision': array([0.01215926]), 'recall': array([0.02947581]), 'ndcg': array([0.02238711])}
EPOCH[601/1000] loss0.008-|Sample:14.72|
EPOCH[602/1000] loss0.008-|Sample:14.68|
EPOCH[603/1000] loss0.008-|Sample:14.17|
EPOCH[604/1000] loss0.008-|Sample:14.76|
EPOCH[605/1000] loss0.008-|Sample:15.01|
EPOCH[606/1000] loss0.008-|Sample:14.03|
EPOCH[607/1000] loss0.008-|Sample:14.84|
EPOCH[608/1000] loss0.008-|Sample:14.84|
EPOCH[609/1000] loss0.008-|Sample:14.68|
EPOCH[610/1000] loss0.008-|Sample:14.48|
[TEST]
{'precision': array([0.01225424]), 'recall': array([0.02969379]), 'ndcg': array([0.02259284])}
EPOCH[611/1000] loss0.008-|Sample:14.61|
EPOCH[612/1000] loss0.008-|Sample:14.32|
EPOCH[613/1000] loss0.008-|Sample:14.93|
EPOCH[614/1000] loss0.008-|Sample:14.79|
EPOCH[615/1000] loss0.008-|Sample:14.42|
EPOCH[616/1000] loss0.008-|Sample:14.79|
EPOCH[617/1000] loss0.008-|Sample:14.72|
EPOCH[618/1000] loss0.008-|Sample:14.68|
EPOCH[619/1000] loss0.008-|Sample:14.95|
EPOCH[620/1000] loss0.008-|Sample:14.40|
[TEST]
{'precision': array([0.01218871]), 'recall': array([0.02961751]), 'ndcg': array([0.02259264])}
EPOCH[621/1000] loss0.008-|Sample:14.93|
EPOCH[622/1000] loss0.008-|Sample:14.65|
EPOCH[623/1000] loss0.008-|Sample:14.31|
EPOCH[624/1000] loss0.008-|Sample:15.00|
EPOCH[625/1000] loss0.008-|Sample:14.78|
EPOCH[626/1000] loss0.008-|Sample:14.45|
EPOCH[627/1000] loss0.008-|Sample:14.79|
EPOCH[628/1000] loss0.008-|Sample:14.61|
EPOCH[629/1000] loss0.008-|Sample:14.67|
EPOCH[630/1000] loss0.008-|Sample:14.56|
[TEST]
{'precision': array([0.01225994]), 'recall': array([0.02982049]), 'ndcg': array([0.02263765])}
EPOCH[631/1000] loss0.008-|Sample:14.57|
EPOCH[632/1000] loss0.008-|Sample:14.86|
EPOCH[633/1000] loss0.008-|Sample:14.67|
EPOCH[634/1000] loss0.008-|Sample:14.61|
EPOCH[635/1000] loss0.008-|Sample:14.67|
EPOCH[636/1000] loss0.008-|Sample:14.79|
EPOCH[637/1000] loss0.008-|Sample:14.17|
EPOCH[638/1000] loss0.008-|Sample:14.87|
EPOCH[639/1000] loss0.008-|Sample:14.87|
EPOCH[640/1000] loss0.008-|Sample:14.18|
[TEST]
{'precision': array([0.01242235]), 'recall': array([0.03039818]), 'ndcg': array([0.02290998])}
EPOCH[641/1000] loss0.008-|Sample:14.98|
EPOCH[642/1000] loss0.008-|Sample:14.34|
EPOCH[643/1000] loss0.008-|Sample:14.70|
EPOCH[644/1000] loss0.008-|Sample:14.87|
EPOCH[645/1000] loss0.008-|Sample:14.26|
EPOCH[646/1000] loss0.008-|Sample:14.87|
EPOCH[647/1000] loss0.008-|Sample:14.73|
EPOCH[648/1000] loss0.008-|Sample:14.06|
EPOCH[649/1000] loss0.008-|Sample:14.72|
EPOCH[650/1000] loss0.008-|Sample:14.92|
[TEST]
{'precision': array([0.01238816]), 'recall': array([0.0301527]), 'ndcg': array([0.02286942])}
EPOCH[651/1000] loss0.008-|Sample:14.78|
EPOCH[652/1000] loss0.008-|Sample:14.64|
EPOCH[653/1000] loss0.008-|Sample:14.26|
EPOCH[654/1000] loss0.008-|Sample:14.67|
EPOCH[655/1000] loss0.008-|Sample:14.82|
EPOCH[656/1000] loss0.008-|Sample:14.00|
EPOCH[657/1000] loss0.008-|Sample:14.79|
EPOCH[658/1000] loss0.008-|Sample:14.93|
EPOCH[659/1000] loss0.008-|Sample:14.23|
EPOCH[660/1000] loss0.008-|Sample:14.90|
[TEST]
{'precision': array([0.01254773]), 'recall': array([0.03040643]), 'ndcg': array([0.02303562])}
EPOCH[661/1000] loss0.008-|Sample:14.28|
EPOCH[662/1000] loss0.008-|Sample:14.79|
EPOCH[663/1000] loss0.008-|Sample:14.79|
EPOCH[664/1000] loss0.008-|Sample:14.39|
EPOCH[665/1000] loss0.008-|Sample:14.47|
EPOCH[666/1000] loss0.008-|Sample:14.84|
EPOCH[667/1000] loss0.008-|Sample:14.42|
EPOCH[668/1000] loss0.008-|Sample:14.67|
EPOCH[669/1000] loss0.008-|Sample:14.97|
EPOCH[670/1000] loss0.008-|Sample:14.31|
[TEST]
{'precision': array([0.01255438]), 'recall': array([0.03060289]), 'ndcg': array([0.02309051])}
EPOCH[671/1000] loss0.008-|Sample:15.00|
EPOCH[672/1000] loss0.008-|Sample:14.57|
EPOCH[673/1000] loss0.008-|Sample:14.50|
EPOCH[674/1000] loss0.008-|Sample:15.03|
EPOCH[675/1000] loss0.008-|Sample:14.48|
EPOCH[676/1000] loss0.008-|Sample:14.54|
EPOCH[677/1000] loss0.008-|Sample:14.79|
EPOCH[678/1000] loss0.008-|Sample:14.53|
EPOCH[679/1000] loss0.008-|Sample:14.61|
EPOCH[680/1000] loss0.008-|Sample:14.62|
[TEST]
{'precision': array([0.01251733]), 'recall': array([0.03045644]), 'ndcg': array([0.02310145])}
EPOCH[681/1000] loss0.008-|Sample:14.73|
EPOCH[682/1000] loss0.008-|Sample:14.90|
EPOCH[683/1000] loss0.008-|Sample:14.42|
EPOCH[684/1000] loss0.008-|Sample:14.84|
EPOCH[685/1000] loss0.008-|Sample:14.75|
EPOCH[686/1000] loss0.008-|Sample:14.25|
EPOCH[687/1000] loss0.008-|Sample:14.87|
EPOCH[688/1000] loss0.008-|Sample:14.78|
EPOCH[689/1000] loss0.008-|Sample:14.28|
EPOCH[690/1000] loss0.008-|Sample:14.57|
[TEST]
{'precision': array([0.0126921]), 'recall': array([0.0309615]), 'ndcg': array([0.0234306])}
EPOCH[691/1000] loss0.008-|Sample:14.65|
EPOCH[692/1000] loss0.008-|Sample:13.92|
EPOCH[693/1000] loss0.008-|Sample:14.73|
EPOCH[694/1000] loss0.008-|Sample:14.79|
EPOCH[695/1000] loss0.008-|Sample:13.97|
EPOCH[696/1000] loss0.008-|Sample:14.82|
EPOCH[697/1000] loss0.008-|Sample:14.86|
EPOCH[698/1000] loss0.008-|Sample:14.01|
EPOCH[699/1000] loss0.008-|Sample:14.79|
EPOCH[700/1000] loss0.008-|Sample:15.06|
[TEST]
{'precision': array([0.01285261]), 'recall': array([0.03135187]), 'ndcg': array([0.02372852])}
EPOCH[701/1000] loss0.008-|Sample:14.75|
EPOCH[702/1000] loss0.008-|Sample:14.76|
EPOCH[703/1000] loss0.008-|Sample:14.25|
EPOCH[704/1000] loss0.007-|Sample:14.75|
EPOCH[705/1000] loss0.008-|Sample:14.92|
EPOCH[706/1000] loss0.008-|Sample:14.25|
EPOCH[707/1000] loss0.008-|Sample:14.82|
EPOCH[708/1000] loss0.008-|Sample:14.86|
EPOCH[709/1000] loss0.008-|Sample:14.36|
EPOCH[710/1000] loss0.007-|Sample:14.87|
[TEST]
{'precision': array([0.01267975]), 'recall': array([0.03092137]), 'ndcg': array([0.0233712])}
EPOCH[711/1000] loss0.008-|Sample:14.45|
EPOCH[712/1000] loss0.008-|Sample:14.81|
EPOCH[713/1000] loss0.008-|Sample:14.56|
EPOCH[714/1000] loss0.007-|Sample:14.48|
EPOCH[715/1000] loss0.008-|Sample:15.07|
EPOCH[716/1000] loss0.007-|Sample:14.53|
EPOCH[717/1000] loss0.008-|Sample:14.61|
EPOCH[718/1000] loss0.008-|Sample:14.78|
EPOCH[719/1000] loss0.008-|Sample:14.92|
EPOCH[720/1000] loss0.008-|Sample:14.12|
[TEST]
{'precision': array([0.01273009]), 'recall': array([0.03090582]), 'ndcg': array([0.02343039])}
EPOCH[721/1000] loss0.007-|Sample:14.78|
EPOCH[722/1000] loss0.008-|Sample:14.32|
EPOCH[723/1000] loss0.008-|Sample:14.62|
EPOCH[724/1000] loss0.007-|Sample:14.81|
EPOCH[725/1000] loss0.008-|Sample:14.50|
EPOCH[726/1000] loss0.008-|Sample:14.70|
EPOCH[727/1000] loss0.008-|Sample:14.78|
EPOCH[728/1000] loss0.008-|Sample:14.39|
EPOCH[729/1000] loss0.008-|Sample:14.93|
EPOCH[730/1000] loss0.007-|Sample:14.57|
[TEST]
{'precision': array([0.01260851]), 'recall': array([0.03083065]), 'ndcg': array([0.02349002])}
EPOCH[731/1000] loss0.008-|Sample:14.84|
EPOCH[732/1000] loss0.008-|Sample:14.64|
EPOCH[733/1000] loss0.008-|Sample:14.48|
EPOCH[734/1000] loss0.008-|Sample:14.93|
EPOCH[735/1000] loss0.008-|Sample:14.76|
EPOCH[736/1000] loss0.008-|Sample:14.37|
EPOCH[737/1000] loss0.008-|Sample:14.65|
EPOCH[738/1000] loss0.007-|Sample:14.84|
EPOCH[739/1000] loss0.008-|Sample:14.29|
EPOCH[740/1000] loss0.007-|Sample:14.84|
[TEST]
{'precision': array([0.01276903]), 'recall': array([0.03138441]), 'ndcg': array([0.02377667])}
EPOCH[741/1000] loss0.007-|Sample:14.17|
EPOCH[742/1000] loss0.007-|Sample:14.65|
EPOCH[743/1000] loss0.008-|Sample:14.75|
EPOCH[744/1000] loss0.008-|Sample:14.32|
EPOCH[745/1000] loss0.007-|Sample:14.70|
EPOCH[746/1000] loss0.007-|Sample:14.82|
EPOCH[747/1000] loss0.008-|Sample:14.87|
EPOCH[748/1000] loss0.008-|Sample:14.45|
EPOCH[749/1000] loss0.008-|Sample:14.89|
EPOCH[750/1000] loss0.007-|Sample:14.75|
[TEST]
{'precision': array([0.01279182]), 'recall': array([0.03129309]), 'ndcg': array([0.0238233])}
EPOCH[751/1000] loss0.007-|Sample:14.78|
EPOCH[752/1000] loss0.007-|Sample:14.78|
EPOCH[753/1000] loss0.007-|Sample:14.50|
EPOCH[754/1000] loss0.007-|Sample:14.87|
EPOCH[755/1000] loss0.007-|Sample:15.03|
EPOCH[756/1000] loss0.007-|Sample:14.36|
EPOCH[757/1000] loss0.008-|Sample:14.82|
EPOCH[758/1000] loss0.007-|Sample:14.75|
EPOCH[759/1000] loss0.008-|Sample:14.39|
EPOCH[760/1000] loss0.007-|Sample:14.79|
[TEST]
{'precision': array([0.01286211]), 'recall': array([0.03142404]), 'ndcg': array([0.02384394])}
EPOCH[761/1000] loss0.007-|Sample:14.45|
EPOCH[762/1000] loss0.007-|Sample:14.82|
EPOCH[763/1000] loss0.007-|Sample:14.54|
EPOCH[764/1000] loss0.008-|Sample:14.50|
EPOCH[765/1000] loss0.007-|Sample:14.73|
EPOCH[766/1000] loss0.008-|Sample:14.59|
EPOCH[767/1000] loss0.007-|Sample:14.48|
EPOCH[768/1000] loss0.007-|Sample:14.78|
EPOCH[769/1000] loss0.007-|Sample:14.59|
EPOCH[770/1000] loss0.007-|Sample:14.64|
[TEST]
{'precision': array([0.01290105]), 'recall': array([0.0315681]), 'ndcg': array([0.02395589])}
EPOCH[771/1000] loss0.007-|Sample:14.62|
EPOCH[772/1000] loss0.007-|Sample:14.32|
EPOCH[773/1000] loss0.008-|Sample:15.00|
EPOCH[774/1000] loss0.007-|Sample:14.70|
EPOCH[775/1000] loss0.008-|Sample:14.28|
EPOCH[776/1000] loss0.008-|Sample:14.75|
EPOCH[777/1000] loss0.007-|Sample:14.82|
EPOCH[778/1000] loss0.008-|Sample:14.37|
EPOCH[779/1000] loss0.007-|Sample:14.75|
EPOCH[780/1000] loss0.007-|Sample:14.56|
[TEST]
{'precision': array([0.01291435]), 'recall': array([0.03154043]), 'ndcg': array([0.02398942])}
EPOCH[781/1000] loss0.007-|Sample:14.86|
EPOCH[782/1000] loss0.007-|Sample:14.73|
EPOCH[783/1000] loss0.008-|Sample:14.40|
EPOCH[784/1000] loss0.007-|Sample:14.78|
EPOCH[785/1000] loss0.007-|Sample:14.82|
EPOCH[786/1000] loss0.007-|Sample:14.12|
EPOCH[787/1000] loss0.007-|Sample:14.72|
EPOCH[788/1000] loss0.007-|Sample:14.72|
EPOCH[789/1000] loss0.007-|Sample:14.25|
EPOCH[790/1000] loss0.007-|Sample:14.73|
[TEST]
{'precision': array([0.01291055]), 'recall': array([0.03155684]), 'ndcg': array([0.02383246])}
EPOCH[791/1000] loss0.007-|Sample:14.43|
EPOCH[792/1000] loss0.007-|Sample:14.67|
EPOCH[793/1000] loss0.007-|Sample:14.79|
EPOCH[794/1000] loss0.007-|Sample:14.43|
EPOCH[795/1000] loss0.007-|Sample:14.79|
EPOCH[796/1000] loss0.007-|Sample:14.78|
EPOCH[797/1000] loss0.007-|Sample:14.65|
EPOCH[798/1000] loss0.007-|Sample:14.70|
EPOCH[799/1000] loss0.007-|Sample:14.67|
EPOCH[800/1000] loss0.007-|Sample:14.68|
[TEST]
{'precision': array([0.0129172]), 'recall': array([0.0315462]), 'ndcg': array([0.02389928])}
EPOCH[801/1000] loss0.008-|Sample:14.59|
EPOCH[802/1000] loss0.007-|Sample:14.59|
EPOCH[803/1000] loss0.008-|Sample:14.51|
EPOCH[804/1000] loss0.007-|Sample:14.75|
EPOCH[805/1000] loss0.007-|Sample:14.76|
EPOCH[806/1000] loss0.007-|Sample:14.48|
EPOCH[807/1000] loss0.007-|Sample:14.86|
EPOCH[808/1000] loss0.007-|Sample:14.64|
EPOCH[809/1000] loss0.007-|Sample:14.59|
EPOCH[810/1000] loss0.007-|Sample:15.01|
[TEST]
{'precision': array([0.01299223]), 'recall': array([0.03188176]), 'ndcg': array([0.02415272])}
EPOCH[811/1000] loss0.007-|Sample:14.67|
EPOCH[812/1000] loss0.007-|Sample:14.89|
EPOCH[813/1000] loss0.007-|Sample:14.48|
EPOCH[814/1000] loss0.007-|Sample:14.67|
EPOCH[815/1000] loss0.007-|Sample:14.93|
EPOCH[816/1000] loss0.007-|Sample:14.39|
EPOCH[817/1000] loss0.007-|Sample:14.93|
EPOCH[818/1000] loss0.007-|Sample:14.82|
EPOCH[819/1000] loss0.007-|Sample:14.47|
EPOCH[820/1000] loss0.007-|Sample:14.59|
[TEST]
{'precision': array([0.01303877]), 'recall': array([0.03188281]), 'ndcg': array([0.02411154])}
EPOCH[821/1000] loss0.007-|Sample:14.47|
EPOCH[822/1000] loss0.007-|Sample:14.62|
EPOCH[823/1000] loss0.007-|Sample:14.75|
EPOCH[824/1000] loss0.007-|Sample:14.39|
EPOCH[825/1000] loss0.007-|Sample:14.65|
EPOCH[826/1000] loss0.007-|Sample:14.72|
EPOCH[827/1000] loss0.007-|Sample:14.29|
EPOCH[828/1000] loss0.007-|Sample:14.86|
EPOCH[829/1000] loss0.007-|Sample:14.79|
EPOCH[830/1000] loss0.007-|Sample:14.72|
[TEST]
{'precision': array([0.0131499]), 'recall': array([0.03224721]), 'ndcg': array([0.02439191])}
EPOCH[831/1000] loss0.007-|Sample:14.79|
EPOCH[832/1000] loss0.007-|Sample:14.92|
EPOCH[833/1000] loss0.007-|Sample:14.23|
EPOCH[834/1000] loss0.007-|Sample:14.70|
EPOCH[835/1000] loss0.007-|Sample:14.72|
EPOCH[836/1000] loss0.007-|Sample:14.22|
EPOCH[837/1000] loss0.007-|Sample:14.68|
EPOCH[838/1000] loss0.007-|Sample:14.64|
EPOCH[839/1000] loss0.007-|Sample:14.45|
EPOCH[840/1000] loss0.007-|Sample:14.59|
[TEST]
{'precision': array([0.01317459]), 'recall': array([0.0323884]), 'ndcg': array([0.02450131])}
EPOCH[841/1000] loss0.007-|Sample:14.64|
EPOCH[842/1000] loss0.007-|Sample:14.68|
EPOCH[843/1000] loss0.007-|Sample:14.67|
EPOCH[844/1000] loss0.007-|Sample:14.81|
EPOCH[845/1000] loss0.007-|Sample:14.82|
EPOCH[846/1000] loss0.007-|Sample:14.50|
EPOCH[847/1000] loss0.007-|Sample:14.64|
EPOCH[848/1000] loss0.007-|Sample:14.75|
EPOCH[849/1000] loss0.007-|Sample:14.37|
EPOCH[850/1000] loss0.007-|Sample:14.78|
[TEST]
{'precision': array([0.01304827]), 'recall': array([0.03193724]), 'ndcg': array([0.02437724])}
EPOCH[851/1000] loss0.007-|Sample:14.56|
EPOCH[852/1000] loss0.007-|Sample:14.48|
EPOCH[853/1000] loss0.007-|Sample:14.92|
EPOCH[854/1000] loss0.007-|Sample:14.37|
EPOCH[855/1000] loss0.007-|Sample:14.72|
EPOCH[856/1000] loss0.007-|Sample:14.61|
EPOCH[857/1000] loss0.007-|Sample:14.73|
EPOCH[858/1000] loss0.007-|Sample:14.32|
EPOCH[859/1000] loss0.007-|Sample:14.67|
EPOCH[860/1000] loss0.007-|Sample:14.93|
[TEST]
{'precision': array([0.0131461]), 'recall': array([0.03222779]), 'ndcg': array([0.02444159])}
EPOCH[861/1000] loss0.007-|Sample:14.68|
EPOCH[862/1000] loss0.007-|Sample:14.92|
EPOCH[863/1000] loss0.007-|Sample:14.40|
EPOCH[864/1000] loss0.007-|Sample:14.78|
EPOCH[865/1000] loss0.007-|Sample:14.70|
EPOCH[866/1000] loss0.007-|Sample:14.36|
EPOCH[867/1000] loss0.007-|Sample:14.70|
EPOCH[868/1000] loss0.007-|Sample:14.76|
EPOCH[869/1000] loss0.007-|Sample:14.18|
EPOCH[870/1000] loss0.007-|Sample:14.73|
[TEST]
{'precision': array([0.01309576]), 'recall': array([0.03188355]), 'ndcg': array([0.0242583])}
EPOCH[871/1000] loss0.007-|Sample:14.17|
EPOCH[872/1000] loss0.007-|Sample:14.61|
EPOCH[873/1000] loss0.007-|Sample:14.79|
EPOCH[874/1000] loss0.007-|Sample:14.11|
EPOCH[875/1000] loss0.007-|Sample:14.75|
EPOCH[876/1000] loss0.007-|Sample:14.72|
EPOCH[877/1000] loss0.007-|Sample:14.22|
EPOCH[878/1000] loss0.007-|Sample:14.72|
EPOCH[879/1000] loss0.007-|Sample:14.72|
EPOCH[880/1000] loss0.007-|Sample:14.25|
[TEST]
{'precision': array([0.01317269]), 'recall': array([0.03220317]), 'ndcg': array([0.02450498])}
EPOCH[881/1000] loss0.007-|Sample:14.79|
EPOCH[882/1000] loss0.007-|Sample:14.26|
EPOCH[883/1000] loss0.007-|Sample:14.89|
EPOCH[884/1000] loss0.007-|Sample:14.68|
EPOCH[885/1000] loss0.007-|Sample:14.64|
EPOCH[886/1000] loss0.007-|Sample:14.47|
EPOCH[887/1000] loss0.007-|Sample:14.68|
EPOCH[888/1000] loss0.007-|Sample:14.53|
EPOCH[889/1000] loss0.007-|Sample:14.72|
EPOCH[890/1000] loss0.007-|Sample:14.57|
[TEST]
{'precision': array([0.01313565]), 'recall': array([0.03221146]), 'ndcg': array([0.02462241])}
EPOCH[891/1000] loss0.007-|Sample:14.57|
EPOCH[892/1000] loss0.007-|Sample:14.59|
EPOCH[893/1000] loss0.007-|Sample:14.48|
EPOCH[894/1000] loss0.007-|Sample:14.76|
EPOCH[895/1000] loss0.007-|Sample:14.79|
EPOCH[896/1000] loss0.007-|Sample:14.39|
EPOCH[897/1000] loss0.007-|Sample:15.03|
EPOCH[898/1000] loss0.007-|Sample:14.82|
EPOCH[899/1000] loss0.007-|Sample:14.29|
EPOCH[900/1000] loss0.007-|Sample:14.90|
[TEST]
{'precision': array([0.01324773]), 'recall': array([0.03243464]), 'ndcg': array([0.02477783])}
EPOCH[901/1000] loss0.007-|Sample:14.32|
EPOCH[902/1000] loss0.007-|Sample:14.72|
EPOCH[903/1000] loss0.007-|Sample:14.79|
EPOCH[904/1000] loss0.007-|Sample:14.17|
EPOCH[905/1000] loss0.007-|Sample:15.04|
EPOCH[906/1000] loss0.007-|Sample:14.75|
EPOCH[907/1000] loss0.007-|Sample:14.32|
EPOCH[908/1000] loss0.007-|Sample:14.98|
EPOCH[909/1000] loss0.007-|Sample:14.64|
EPOCH[910/1000] loss0.007-|Sample:14.20|
[TEST]
{'precision': array([0.01329901]), 'recall': array([0.03265218]), 'ndcg': array([0.02479423])}
EPOCH[911/1000] loss0.007-|Sample:14.56|
EPOCH[912/1000] loss0.007-|Sample:14.78|
EPOCH[913/1000] loss0.007-|Sample:14.15|
EPOCH[914/1000] loss0.007-|Sample:14.68|
EPOCH[915/1000] loss0.007-|Sample:14.78|
EPOCH[916/1000] loss0.007-|Sample:13.92|
EPOCH[917/1000] loss0.007-|Sample:14.81|
EPOCH[918/1000] loss0.007-|Sample:14.75|
EPOCH[919/1000] loss0.007-|Sample:14.37|
EPOCH[920/1000] loss0.007-|Sample:14.57|
[TEST]
{'precision': array([0.01336645]), 'recall': array([0.03271214]), 'ndcg': array([0.0247437])}
EPOCH[921/1000] loss0.007-|Sample:14.59|
EPOCH[922/1000] loss0.007-|Sample:14.75|
EPOCH[923/1000] loss0.007-|Sample:14.70|
EPOCH[924/1000] loss0.007-|Sample:14.61|
EPOCH[925/1000] loss0.007-|Sample:14.70|
EPOCH[926/1000] loss0.007-|Sample:14.59|
EPOCH[927/1000] loss0.007-|Sample:14.64|
EPOCH[928/1000] loss0.007-|Sample:14.79|
EPOCH[929/1000] loss0.007-|Sample:14.42|
EPOCH[930/1000] loss0.007-|Sample:14.54|
[TEST]
{'precision': array([0.0133598]), 'recall': array([0.03264507]), 'ndcg': array([0.02473364])}
EPOCH[931/1000] loss0.007-|Sample:14.87|
EPOCH[932/1000] loss0.007-|Sample:14.42|
EPOCH[933/1000] loss0.007-|Sample:14.89|
EPOCH[934/1000] loss0.007-|Sample:14.53|
EPOCH[935/1000] loss0.007-|Sample:14.45|
EPOCH[936/1000] loss0.007-|Sample:14.97|
EPOCH[937/1000] loss0.007-|Sample:14.28|
EPOCH[938/1000] loss0.007-|Sample:14.61|
EPOCH[939/1000] loss0.007-|Sample:14.84|
EPOCH[940/1000] loss0.007-|Sample:14.56|
[TEST]
{'precision': array([0.01337595]), 'recall': array([0.03270798]), 'ndcg': array([0.02472182])}
EPOCH[941/1000] loss0.007-|Sample:14.70|
EPOCH[942/1000] loss0.007-|Sample:14.64|
EPOCH[943/1000] loss0.007-|Sample:14.42|
EPOCH[944/1000] loss0.007-|Sample:14.70|
EPOCH[945/1000] loss0.007-|Sample:14.64|
EPOCH[946/1000] loss0.007-|Sample:14.31|
EPOCH[947/1000] loss0.007-|Sample:14.92|
EPOCH[948/1000] loss0.007-|Sample:14.72|
EPOCH[949/1000] loss0.007-|Sample:14.34|
EPOCH[950/1000] loss0.007-|Sample:14.84|
[TEST]
{'precision': array([0.01335505]), 'recall': array([0.03262455]), 'ndcg': array([0.02464006])}
EPOCH[951/1000] loss0.007-|Sample:14.48|
EPOCH[952/1000] loss0.007-|Sample:14.81|
EPOCH[953/1000] loss0.007-|Sample:14.87|
EPOCH[954/1000] loss0.007-|Sample:14.09|
EPOCH[955/1000] loss0.007-|Sample:14.79|
EPOCH[956/1000] loss0.007-|Sample:14.61|
EPOCH[957/1000] loss0.007-|Sample:14.28|
EPOCH[958/1000] loss0.007-|Sample:14.95|
EPOCH[959/1000] loss0.007-|Sample:14.68|
EPOCH[960/1000] loss0.007-|Sample:14.07|
[TEST]
{'precision': array([0.01328192]), 'recall': array([0.03246567]), 'ndcg': array([0.02458817])}
EPOCH[961/1000] loss0.007-|Sample:14.56|
EPOCH[962/1000] loss0.007-|Sample:14.11|
EPOCH[963/1000] loss0.007-|Sample:14.62|
EPOCH[964/1000] loss0.007-|Sample:14.72|
EPOCH[965/1000] loss0.007-|Sample:14.18|
EPOCH[966/1000] loss0.007-|Sample:14.81|
EPOCH[967/1000] loss0.007-|Sample:14.67|
EPOCH[968/1000] loss0.007-|Sample:14.68|
EPOCH[969/1000] loss0.007-|Sample:14.75|
EPOCH[970/1000] loss0.007-|Sample:14.61|
[TEST]
{'precision': array([0.01345193]), 'recall': array([0.03290292]), 'ndcg': array([0.02499927])}
EPOCH[971/1000] loss0.007-|Sample:14.62|
EPOCH[972/1000] loss0.007-|Sample:14.65|
EPOCH[973/1000] loss0.007-|Sample:14.54|
EPOCH[974/1000] loss0.007-|Sample:14.56|
EPOCH[975/1000] loss0.007-|Sample:14.86|
EPOCH[976/1000] loss0.007-|Sample:14.43|
EPOCH[977/1000] loss0.007-|Sample:14.75|
EPOCH[978/1000] loss0.007-|Sample:14.75|
EPOCH[979/1000] loss0.007-|Sample:14.54|
EPOCH[980/1000] loss0.007-|Sample:14.64|
[TEST]
{'precision': array([0.01337975]), 'recall': array([0.03279804]), 'ndcg': array([0.02487123])}
EPOCH[981/1000] loss0.007-|Sample:14.62|
EPOCH[982/1000] loss0.007-|Sample:14.54|
EPOCH[983/1000] loss0.007-|Sample:14.87|
EPOCH[984/1000] loss0.007-|Sample:14.50|
EPOCH[985/1000] loss0.007-|Sample:14.75|
EPOCH[986/1000] loss0.007-|Sample:14.79|
EPOCH[987/1000] loss0.007-|Sample:14.43|
EPOCH[988/1000] loss0.007-|Sample:14.90|
EPOCH[989/1000] loss0.007-|Sample:14.79|
EPOCH[990/1000] loss0.007-|Sample:14.20|
[TEST]
{'precision': array([0.01340254]), 'recall': array([0.03271093]), 'ndcg': array([0.02483238])}
EPOCH[991/1000] loss0.007-|Sample:14.95|
EPOCH[992/1000] loss0.007-|Sample:14.53|
EPOCH[993/1000] loss0.007-|Sample:14.78|
EPOCH[994/1000] loss0.007-|Sample:14.76|
EPOCH[995/1000] loss0.007-|Sample:14.84|
EPOCH[996/1000] loss0.007-|Sample:14.06|
EPOCH[997/1000] loss0.007-|Sample:14.93|
EPOCH[998/1000] loss0.007-|Sample:14.75|
EPOCH[999/1000] loss0.007-|Sample:14.28|
EPOCH[1000/1000] loss0.007-|Sample:14.82|

Process finished with exit code 0

model:lgn layer:2
D:\ProgramFiles\Anaconda3\envs\image_caption_python36\python.exe D:/workspace/LightGcn/LightGCN-PyTorch-master/code/main.py
Cpp extension not loaded
>>SEED: 2020
loading [../data/amazon-book]
2380730 interactions for training
603382 interactions for testing
amazon-book Sparsity : 0.0006188476640083725
amazon-book is ready to go
===========config================
{'A_n_fold': 100,
 'A_split': False,
 'bigdata': False,
 'bpr_batch_size': 2048,
 'decay': 0.0001,
 'dropout': 0,
 'keep_prob': 0.6,
 'latent_dim_rec': 64,
 'lightGCN_n_layers': 2,
 'lr': 0.001,
 'multicore': 0,
 'pretrain': 0,
 'test_u_batch_size': 100}
cores for test: 6
comment: lgn
tensorboard: 1
LOAD: 0
Weight path: ./checkpoints
Test Topks: [20]
using bpr loss
===========end===================
use NORMAL distribution initilizer
loading adjacency matrix
successfully loaded...
don't split the matrix
lgn is already to go(dropout:0)
load and save to /home/qhc/下载/LightGCN-PyTorch-master\code\checkpoints\lgn-amazon-book-2-64.pth.tar
[TEST]
{'precision': array([0.00011587]), 'recall': array([0.00020769]), 'ndcg': array([0.00016923])}
EPOCH[1/1000] loss0.514-|Sample:13.14|
EPOCH[2/1000] loss0.228-|Sample:13.45|
EPOCH[3/1000] loss0.172-|Sample:13.77|
EPOCH[4/1000] loss0.144-|Sample:13.92|
EPOCH[5/1000] loss0.125-|Sample:13.97|
EPOCH[6/1000] loss0.112-|Sample:14.12|
EPOCH[7/1000] loss0.102-|Sample:14.03|
EPOCH[8/1000] loss0.093-|Sample:13.78|
EPOCH[9/1000] loss0.086-|Sample:14.47|
EPOCH[10/1000] loss0.081-|Sample:14.06|
[TEST]
{'precision': array([0.01104325]), 'recall': array([0.02557576]), 'ndcg': array([0.01982961])}
EPOCH[11/1000] loss0.076-|Sample:13.84|
EPOCH[12/1000] loss0.071-|Sample:14.07|
EPOCH[13/1000] loss0.067-|Sample:13.79|
EPOCH[14/1000] loss0.064-|Sample:13.97|
EPOCH[15/1000] loss0.061-|Sample:14.01|
EPOCH[16/1000] loss0.058-|Sample:14.25|
EPOCH[17/1000] loss0.056-|Sample:14.12|
EPOCH[18/1000] loss0.053-|Sample:14.36|
EPOCH[19/1000] loss0.051-|Sample:14.17|
EPOCH[20/1000] loss0.049-|Sample:13.82|
[TEST]
{'precision': array([0.01245655]), 'recall': array([0.02941761]), 'ndcg': array([0.02278977])}
EPOCH[21/1000] loss0.047-|Sample:13.86|
EPOCH[22/1000] loss0.045-|Sample:13.97|
EPOCH[23/1000] loss0.044-|Sample:14.65|
EPOCH[24/1000] loss0.043-|Sample:13.79|
EPOCH[25/1000] loss0.042-|Sample:14.28|
EPOCH[26/1000] loss0.040-|Sample:14.09|
EPOCH[27/1000] loss0.039-|Sample:14.62|
EPOCH[28/1000] loss0.038-|Sample:14.70|
EPOCH[29/1000] loss0.037-|Sample:13.67|
EPOCH[30/1000] loss0.036-|Sample:14.28|
[TEST]
{'precision': array([0.01345288]), 'recall': array([0.03214101]), 'ndcg': array([0.02468908])}
EPOCH[31/1000] loss0.035-|Sample:13.72|
EPOCH[32/1000] loss0.035-|Sample:14.03|
EPOCH[33/1000] loss0.034-|Sample:14.07|
EPOCH[34/1000] loss0.033-|Sample:14.15|
EPOCH[35/1000] loss0.032-|Sample:14.18|
EPOCH[36/1000] loss0.031-|Sample:14.25|
EPOCH[37/1000] loss0.031-|Sample:14.04|
EPOCH[38/1000] loss0.030-|Sample:14.11|
EPOCH[39/1000] loss0.030-|Sample:14.31|
EPOCH[40/1000] loss0.029-|Sample:14.32|
[TEST]
{'precision': array([0.0138404]), 'recall': array([0.03320103]), 'ndcg': array([0.02559013])}
EPOCH[41/1000] loss0.028-|Sample:14.00|
EPOCH[42/1000] loss0.028-|Sample:14.64|
EPOCH[43/1000] loss0.028-|Sample:14.61|
EPOCH[44/1000] loss0.027-|Sample:13.75|
EPOCH[45/1000] loss0.027-|Sample:14.09|
EPOCH[46/1000] loss0.026-|Sample:14.23|
EPOCH[47/1000] loss0.026-|Sample:13.93|
EPOCH[48/1000] loss0.025-|Sample:19.35|
EPOCH[49/1000] loss0.025-|Sample:15.90|
EPOCH[50/1000] loss0.025-|Sample:15.04|
[TEST]
{'precision': array([0.01430675]), 'recall': array([0.03457699]), 'ndcg': array([0.02652915])}
EPOCH[51/1000] loss0.024-|Sample:15.45|
EPOCH[52/1000] loss0.024-|Sample:14.50|
EPOCH[53/1000] loss0.024-|Sample:14.68|
EPOCH[54/1000] loss0.023-|Sample:15.20|
EPOCH[55/1000] loss0.023-|Sample:15.07|
EPOCH[56/1000] loss0.023-|Sample:14.45|
EPOCH[57/1000] loss0.022-|Sample:14.65|
EPOCH[58/1000] loss0.022-|Sample:14.89|
EPOCH[59/1000] loss0.022-|Sample:14.81|
EPOCH[60/1000] loss0.022-|Sample:14.23|
[TEST]
{'precision': array([0.0147351]), 'recall': array([0.03572424]), 'ndcg': array([0.02747261])}
EPOCH[61/1000] loss0.022-|Sample:14.48|
EPOCH[62/1000] loss0.021-|Sample:14.39|
EPOCH[63/1000] loss0.021-|Sample:15.82|
EPOCH[64/1000] loss0.021-|Sample:14.18|
EPOCH[65/1000] loss0.021-|Sample:13.81|
EPOCH[66/1000] loss0.020-|Sample:14.07|
EPOCH[67/1000] loss0.020-|Sample:14.29|
EPOCH[68/1000] loss0.020-|Sample:13.84|
EPOCH[69/1000] loss0.020-|Sample:14.70|
EPOCH[70/1000] loss0.020-|Sample:14.51|
[TEST]
{'precision': array([0.01494501]), 'recall': array([0.03635584]), 'ndcg': array([0.02797948])}
EPOCH[71/1000] loss0.019-|Sample:13.86|
EPOCH[72/1000] loss0.019-|Sample:14.04|
EPOCH[73/1000] loss0.019-|Sample:13.98|
EPOCH[74/1000] loss0.019-|Sample:13.72|
EPOCH[75/1000] loss0.019-|Sample:14.17|
EPOCH[76/1000] loss0.019-|Sample:14.22|
EPOCH[77/1000] loss0.019-|Sample:13.90|
EPOCH[78/1000] loss0.018-|Sample:14.95|
EPOCH[79/1000] loss0.018-|Sample:13.98|
EPOCH[80/1000] loss0.018-|Sample:13.92|
[TEST]
{'precision': array([0.01501719]), 'recall': array([0.03657907]), 'ndcg': array([0.0281832])}
EPOCH[81/1000] loss0.018-|Sample:14.00|
EPOCH[82/1000] loss0.018-|Sample:14.09|
EPOCH[83/1000] loss0.018-|Sample:13.81|
EPOCH[84/1000] loss0.018-|Sample:13.92|
EPOCH[85/1000] loss0.018-|Sample:14.23|
EPOCH[86/1000] loss0.017-|Sample:13.79|
EPOCH[87/1000] loss0.017-|Sample:13.95|
EPOCH[88/1000] loss0.017-|Sample:14.18|
EPOCH[89/1000] loss0.017-|Sample:14.14|
EPOCH[90/1000] loss0.017-|Sample:13.97|
[TEST]
{'precision': array([0.01532587]), 'recall': array([0.03722893]), 'ndcg': array([0.02871824])}
EPOCH[91/1000] loss0.017-|Sample:14.79|
EPOCH[92/1000] loss0.017-|Sample:13.89|
EPOCH[93/1000] loss0.017-|Sample:14.11|
EPOCH[94/1000] loss0.017-|Sample:14.42|
EPOCH[95/1000] loss0.017-|Sample:13.75|
EPOCH[96/1000] loss0.016-|Sample:14.07|
EPOCH[97/1000] loss0.016-|Sample:14.32|
EPOCH[98/1000] loss0.016-|Sample:14.04|
EPOCH[99/1000] loss0.016-|Sample:13.93|
EPOCH[100/1000] loss0.016-|Sample:14.25|
[TEST]
{'precision': array([0.01547404]), 'recall': array([0.03754346]), 'ndcg': array([0.02894882])}
EPOCH[101/1000] loss0.016-|Sample:14.22|
EPOCH[102/1000] loss0.016-|Sample:13.78|
EPOCH[103/1000] loss0.016-|Sample:14.51|
EPOCH[104/1000] loss0.016-|Sample:13.75|
EPOCH[105/1000] loss0.016-|Sample:13.67|
EPOCH[106/1000] loss0.016-|Sample:14.06|
EPOCH[107/1000] loss0.016-|Sample:14.12|
EPOCH[108/1000] loss0.016-|Sample:14.12|
EPOCH[109/1000] loss0.016-|Sample:14.40|
EPOCH[110/1000] loss0.016-|Sample:14.06|
[TEST]
{'precision': array([0.01539426]), 'recall': array([0.03746971]), 'ndcg': array([0.02901971])}
EPOCH[111/1000] loss0.015-|Sample:13.89|
EPOCH[112/1000] loss0.015-|Sample:13.89|
EPOCH[113/1000] loss0.015-|Sample:13.87|
EPOCH[114/1000] loss0.015-|Sample:14.17|
EPOCH[115/1000] loss0.015-|Sample:13.73|
EPOCH[116/1000] loss0.015-|Sample:14.12|
EPOCH[117/1000] loss0.015-|Sample:14.47|
EPOCH[118/1000] loss0.015-|Sample:14.14|
EPOCH[119/1000] loss0.015-|Sample:14.39|
EPOCH[120/1000] loss0.015-|Sample:13.84|
[TEST]
{'precision': array([0.01562791]), 'recall': array([0.03795806]), 'ndcg': array([0.02935151])}
EPOCH[121/1000] loss0.015-|Sample:13.61|
EPOCH[122/1000] loss0.015-|Sample:13.97|
EPOCH[123/1000] loss0.015-|Sample:14.06|
EPOCH[124/1000] loss0.015-|Sample:13.72|
EPOCH[125/1000] loss0.015-|Sample:14.12|
EPOCH[126/1000] loss0.015-|Sample:14.01|
EPOCH[127/1000] loss0.015-|Sample:13.76|
EPOCH[128/1000] loss0.015-|Sample:14.22|
EPOCH[129/1000] loss0.015-|Sample:14.03|
EPOCH[130/1000] loss0.015-|Sample:14.11|
[TEST]
{'precision': array([0.01573049]), 'recall': array([0.03811065]), 'ndcg': array([0.02947569])}
EPOCH[131/1000] loss0.015-|Sample:14.07|
EPOCH[132/1000] loss0.015-|Sample:14.26|
EPOCH[133/1000] loss0.014-|Sample:13.76|
EPOCH[134/1000] loss0.014-|Sample:13.95|
EPOCH[135/1000] loss0.014-|Sample:14.31|
EPOCH[136/1000] loss0.014-|Sample:13.73|
EPOCH[137/1000] loss0.014-|Sample:14.36|
EPOCH[138/1000] loss0.014-|Sample:14.51|
EPOCH[139/1000] loss0.014-|Sample:14.01|
EPOCH[140/1000] loss0.014-|Sample:14.18|
[TEST]
{'precision': array([0.01582832]), 'recall': array([0.03836461]), 'ndcg': array([0.02962962])}
EPOCH[141/1000] loss0.014-|Sample:14.34|
EPOCH[142/1000] loss0.014-|Sample:14.09|
EPOCH[143/1000] loss0.014-|Sample:13.97|
EPOCH[144/1000] loss0.014-|Sample:14.81|
EPOCH[145/1000] loss0.014-|Sample:13.72|
EPOCH[146/1000] loss0.014-|Sample:13.95|
EPOCH[147/1000] loss0.014-|Sample:14.28|
EPOCH[148/1000] loss0.014-|Sample:14.37|
EPOCH[149/1000] loss0.014-|Sample:13.95|
EPOCH[150/1000] loss0.014-|Sample:14.20|
[TEST]
{'precision': array([0.01585491]), 'recall': array([0.03853367]), 'ndcg': array([0.02980936])}
EPOCH[151/1000] loss0.014-|Sample:14.86|
EPOCH[152/1000] loss0.014-|Sample:13.73|
EPOCH[153/1000] loss0.014-|Sample:14.18|
EPOCH[154/1000] loss0.014-|Sample:13.97|
EPOCH[155/1000] loss0.014-|Sample:14.39|
EPOCH[156/1000] loss0.014-|Sample:18.41|
EPOCH[157/1000] loss0.014-|Sample:15.50|
EPOCH[158/1000] loss0.014-|Sample:15.23|
EPOCH[159/1000] loss0.014-|Sample:15.68|
EPOCH[160/1000] loss0.014-|Sample:14.87|
[TEST]
{'precision': array([0.01600688]), 'recall': array([0.03894175]), 'ndcg': array([0.03005142])}
EPOCH[161/1000] loss0.014-|Sample:14.95|
EPOCH[162/1000] loss0.014-|Sample:15.22|
EPOCH[163/1000] loss0.014-|Sample:15.65|
EPOCH[164/1000] loss0.014-|Sample:15.42|
EPOCH[165/1000] loss0.014-|Sample:17.75|
EPOCH[166/1000] loss0.014-|Sample:18.34|
EPOCH[167/1000] loss0.014-|Sample:17.06|
EPOCH[168/1000] loss0.014-|Sample:16.90|
EPOCH[169/1000] loss0.014-|Sample:18.70|
EPOCH[170/1000] loss0.014-|Sample:18.09|
[TEST]
{'precision': array([0.01601447]), 'recall': array([0.0388583]), 'ndcg': array([0.03015356])}
EPOCH[171/1000] loss0.013-|Sample:17.43|
EPOCH[172/1000] loss0.014-|Sample:17.98|
EPOCH[173/1000] loss0.013-|Sample:17.82|
EPOCH[174/1000] loss0.013-|Sample:18.12|
EPOCH[175/1000] loss0.013-|Sample:18.03|
EPOCH[176/1000] loss0.013-|Sample:16.98|
EPOCH[177/1000] loss0.013-|Sample:16.11|
EPOCH[178/1000] loss0.013-|Sample:17.18|
EPOCH[179/1000] loss0.013-|Sample:18.29|
EPOCH[180/1000] loss0.013-|Sample:17.26|
[TEST]
{'precision': array([0.01602967]), 'recall': array([0.03898252]), 'ndcg': array([0.0301817])}
EPOCH[181/1000] loss0.013-|Sample:17.87|
EPOCH[182/1000] loss0.013-|Sample:16.20|
EPOCH[183/1000] loss0.013-|Sample:18.79|
EPOCH[184/1000] loss0.013-|Sample:17.25|
EPOCH[185/1000] loss0.013-|Sample:17.46|
EPOCH[186/1000] loss0.013-|Sample:18.53|
EPOCH[187/1000] loss0.013-|Sample:15.90|
EPOCH[188/1000] loss0.013-|Sample:18.14|
EPOCH[189/1000] loss0.013-|Sample:18.32|
EPOCH[190/1000] loss0.013-|Sample:17.04|
[TEST]
{'precision': array([0.01615979]), 'recall': array([0.03936053]), 'ndcg': array([0.03042331])}
EPOCH[191/1000] loss0.013-|Sample:16.11|
EPOCH[192/1000] loss0.013-|Sample:16.51|
EPOCH[193/1000] loss0.013-|Sample:16.86|
EPOCH[194/1000] loss0.013-|Sample:18.68|
EPOCH[195/1000] loss0.013-|Sample:16.18|
EPOCH[196/1000] loss0.013-|Sample:16.76|
EPOCH[197/1000] loss0.013-|Sample:18.14|
EPOCH[198/1000] loss0.013-|Sample:15.98|
EPOCH[199/1000] loss0.013-|Sample:16.84|
EPOCH[200/1000] loss0.013-|Sample:16.28|
[TEST]
{'precision': array([0.01601542]), 'recall': array([0.03886333]), 'ndcg': array([0.03015502])}
EPOCH[201/1000] loss0.013-|Sample:18.15|
EPOCH[202/1000] loss0.013-|Sample:16.39|
EPOCH[203/1000] loss0.013-|Sample:17.65|
EPOCH[204/1000] loss0.013-|Sample:18.04|
EPOCH[205/1000] loss0.013-|Sample:15.68|
EPOCH[206/1000] loss0.013-|Sample:17.79|
EPOCH[207/1000] loss0.013-|Sample:18.87|
EPOCH[208/1000] loss0.013-|Sample:17.39|
EPOCH[209/1000] loss0.013-|Sample:17.84|
EPOCH[210/1000] loss0.013-|Sample:16.81|
[TEST]
{'precision': array([0.01622248]), 'recall': array([0.03947158]), 'ndcg': array([0.03046799])}
EPOCH[211/1000] loss0.013-|Sample:18.32|
EPOCH[212/1000] loss0.013-|Sample:16.57|
EPOCH[213/1000] loss0.013-|Sample:18.48|
EPOCH[214/1000] loss0.013-|Sample:17.20|
EPOCH[215/1000] loss0.013-|Sample:16.95|
EPOCH[216/1000] loss0.013-|Sample:16.59|
EPOCH[217/1000] loss0.013-|Sample:18.31|
EPOCH[218/1000] loss0.013-|Sample:16.56|
EPOCH[219/1000] loss0.013-|Sample:16.28|
EPOCH[220/1000] loss0.013-|Sample:15.12|
[TEST]
{'precision': array([0.01610566]), 'recall': array([0.03919678]), 'ndcg': array([0.03037049])}
EPOCH[221/1000] loss0.013-|Sample:16.18|
EPOCH[222/1000] loss0.013-|Sample:16.92|
EPOCH[223/1000] loss0.013-|Sample:16.43|
EPOCH[224/1000] loss0.013-|Sample:16.50|
EPOCH[225/1000] loss0.013-|Sample:18.01|
EPOCH[226/1000] loss0.013-|Sample:17.28|
EPOCH[227/1000] loss0.013-|Sample:16.64|
EPOCH[228/1000] loss0.013-|Sample:17.98|
EPOCH[229/1000] loss0.013-|Sample:18.31|
EPOCH[230/1000] loss0.013-|Sample:16.75|
[TEST]
{'precision': array([0.01613035]), 'recall': array([0.03918328]), 'ndcg': array([0.03028064])}
EPOCH[231/1000] loss0.013-|Sample:17.53|
EPOCH[232/1000] loss0.013-|Sample:18.04|
EPOCH[233/1000] loss0.013-|Sample:16.56|
EPOCH[234/1000] loss0.013-|Sample:17.87|
EPOCH[235/1000] loss0.013-|Sample:16.28|
EPOCH[236/1000] loss0.013-|Sample:17.59|
EPOCH[237/1000] loss0.013-|Sample:18.12|
EPOCH[238/1000] loss0.013-|Sample:17.95|
EPOCH[239/1000] loss0.013-|Sample:18.04|
EPOCH[240/1000] loss0.013-|Sample:18.28|
[TEST]
{'precision': array([0.01619494]), 'recall': array([0.03928751]), 'ndcg': array([0.03043747])}
EPOCH[241/1000] loss0.013-|Sample:18.46|
EPOCH[242/1000] loss0.013-|Sample:17.29|
EPOCH[243/1000] loss0.013-|Sample:17.71|
EPOCH[244/1000] loss0.013-|Sample:18.25|
EPOCH[245/1000] loss0.013-|Sample:17.17|
EPOCH[246/1000] loss0.013-|Sample:17.62|
EPOCH[247/1000] loss0.013-|Sample:18.21|
EPOCH[248/1000] loss0.013-|Sample:17.64|
EPOCH[249/1000] loss0.013-|Sample:18.00|
EPOCH[250/1000] loss0.013-|Sample:16.01|
[TEST]
{'precision': array([0.01615694]), 'recall': array([0.03926764]), 'ndcg': array([0.03038044])}
EPOCH[251/1000] loss0.013-|Sample:18.36|
EPOCH[252/1000] loss0.013-|Sample:17.50|
EPOCH[253/1000] loss0.013-|Sample:16.17|
EPOCH[254/1000] loss0.013-|Sample:18.28|
EPOCH[255/1000] loss0.013-|Sample:17.07|
EPOCH[256/1000] loss0.013-|Sample:16.09|
EPOCH[257/1000] loss0.013-|Sample:17.92|
EPOCH[258/1000] loss0.013-|Sample:18.79|
EPOCH[259/1000] loss0.013-|Sample:16.51|
EPOCH[260/1000] loss0.013-|Sample:17.11|
[TEST]
{'precision': array([0.01626617]), 'recall': array([0.0395881]), 'ndcg': array([0.03062367])}
EPOCH[261/1000] loss0.013-|Sample:16.04|
EPOCH[262/1000] loss0.012-|Sample:18.11|
EPOCH[263/1000] loss0.013-|Sample:18.53|
EPOCH[264/1000] loss0.013-|Sample:16.89|
EPOCH[265/1000] loss0.012-|Sample:16.84|
EPOCH[266/1000] loss0.013-|Sample:15.87|
EPOCH[267/1000] loss0.012-|Sample:18.40|
EPOCH[268/1000] loss0.013-|Sample:16.31|
EPOCH[269/1000] loss0.012-|Sample:16.00|
EPOCH[270/1000] loss0.012-|Sample:18.98|
[TEST]
{'precision': array([0.01617879]), 'recall': array([0.03930642]), 'ndcg': array([0.03041178])}
EPOCH[271/1000] loss0.013-|Sample:18.40|
EPOCH[272/1000] loss0.013-|Sample:18.20|
EPOCH[273/1000] loss0.013-|Sample:17.50|
EPOCH[274/1000] loss0.012-|Sample:16.89|
EPOCH[275/1000] loss0.012-|Sample:16.59|
EPOCH[276/1000] loss0.012-|Sample:17.15|
EPOCH[277/1000] loss0.012-|Sample:18.71|
EPOCH[278/1000] loss0.012-|Sample:17.89|
EPOCH[279/1000] loss0.012-|Sample:18.71|
EPOCH[280/1000] loss0.012-|Sample:17.65|
[TEST]
{'precision': array([0.01623293]), 'recall': array([0.03958367]), 'ndcg': array([0.03045863])}
EPOCH[281/1000] loss0.013-|Sample:18.36|
EPOCH[282/1000] loss0.012-|Sample:16.01|
EPOCH[283/1000] loss0.012-|Sample:19.32|
EPOCH[284/1000] loss0.012-|Sample:17.09|
EPOCH[285/1000] loss0.012-|Sample:15.87|
EPOCH[286/1000] loss0.012-|Sample:17.82|
EPOCH[287/1000] loss0.012-|Sample:18.32|
EPOCH[288/1000] loss0.012-|Sample:18.48|
EPOCH[289/1000] loss0.012-|Sample:16.53|
EPOCH[290/1000] loss0.012-|Sample:17.82|
[TEST]
{'precision': array([0.01641814]), 'recall': array([0.03996647]), 'ndcg': array([0.03070894])}
EPOCH[291/1000] loss0.012-|Sample:16.96|
EPOCH[292/1000] loss0.012-|Sample:18.65|
EPOCH[293/1000] loss0.012-|Sample:16.11|
EPOCH[294/1000] loss0.012-|Sample:18.59|
EPOCH[295/1000] loss0.012-|Sample:17.81|
EPOCH[296/1000] loss0.012-|Sample:17.87|
EPOCH[297/1000] loss0.012-|Sample:18.00|
EPOCH[298/1000] loss0.012-|Sample:17.04|
EPOCH[299/1000] loss0.012-|Sample:18.15|
EPOCH[300/1000] loss0.012-|Sample:15.93|
[TEST]
{'precision': array([0.01638394]), 'recall': array([0.0399983]), 'ndcg': array([0.03075891])}
EPOCH[301/1000] loss0.012-|Sample:18.04|
EPOCH[302/1000] loss0.012-|Sample:17.21|
EPOCH[303/1000] loss0.012-|Sample:17.89|
EPOCH[304/1000] loss0.012-|Sample:17.28|
EPOCH[305/1000] loss0.012-|Sample:17.76|
EPOCH[306/1000] loss0.012-|Sample:16.23|
EPOCH[307/1000] loss0.012-|Sample:17.70|
EPOCH[308/1000] loss0.012-|Sample:16.86|
EPOCH[309/1000] loss0.012-|Sample:17.90|
EPOCH[310/1000] loss0.012-|Sample:17.39|
[TEST]
{'precision': array([0.0163716]), 'recall': array([0.03990711]), 'ndcg': array([0.0307587])}
EPOCH[311/1000] loss0.012-|Sample:16.51|
EPOCH[312/1000] loss0.012-|Sample:18.15|
EPOCH[313/1000] loss0.012-|Sample:17.15|
EPOCH[314/1000] loss0.012-|Sample:19.20|
EPOCH[315/1000] loss0.012-|Sample:17.46|
EPOCH[316/1000] loss0.012-|Sample:17.01|
EPOCH[317/1000] loss0.012-|Sample:17.57|
EPOCH[318/1000] loss0.012-|Sample:18.09|
EPOCH[319/1000] loss0.012-|Sample:17.46|
EPOCH[320/1000] loss0.012-|Sample:17.42|
[TEST]
{'precision': array([0.0163507]), 'recall': array([0.03986905]), 'ndcg': array([0.03075792])}
EPOCH[321/1000] loss0.012-|Sample:17.46|
EPOCH[322/1000] loss0.012-|Sample:18.59|
EPOCH[323/1000] loss0.012-|Sample:17.50|
EPOCH[324/1000] loss0.012-|Sample:16.70|
EPOCH[325/1000] loss0.012-|Sample:18.70|
EPOCH[326/1000] loss0.012-|Sample:15.92|
EPOCH[327/1000] loss0.012-|Sample:17.39|
EPOCH[328/1000] loss0.012-|Sample:17.00|
EPOCH[329/1000] loss0.012-|Sample:16.64|
EPOCH[330/1000] loss0.012-|Sample:19.48|
[TEST]
{'precision': array([0.01630321]), 'recall': array([0.03977608]), 'ndcg': array([0.03064856])}
EPOCH[331/1000] loss0.012-|Sample:17.11|
EPOCH[332/1000] loss0.012-|Sample:18.51|
EPOCH[333/1000] loss0.012-|Sample:16.25|
EPOCH[334/1000] loss0.012-|Sample:16.15|
EPOCH[335/1000] loss0.012-|Sample:17.15|
EPOCH[336/1000] loss0.012-|Sample:16.11|
EPOCH[337/1000] loss0.012-|Sample:17.76|
EPOCH[338/1000] loss0.012-|Sample:18.51|
EPOCH[339/1000] loss0.012-|Sample:16.95|
EPOCH[340/1000] loss0.012-|Sample:17.95|
[TEST]
{'precision': array([0.01632316]), 'recall': array([0.03993364]), 'ndcg': array([0.03086588])}
EPOCH[341/1000] loss0.012-|Sample:17.61|
EPOCH[342/1000] loss0.012-|Sample:18.25|
EPOCH[343/1000] loss0.012-|Sample:16.04|
EPOCH[344/1000] loss0.012-|Sample:18.62|
EPOCH[345/1000] loss0.012-|Sample:17.26|
EPOCH[346/1000] loss0.012-|Sample:18.53|
EPOCH[347/1000] loss0.012-|Sample:16.07|
EPOCH[348/1000] loss0.012-|Sample:18.71|
EPOCH[349/1000] loss0.012-|Sample:17.62|
EPOCH[350/1000] loss0.012-|Sample:17.12|
[TEST]
{'precision': array([0.01645043]), 'recall': array([0.04002521]), 'ndcg': array([0.03093])}
EPOCH[351/1000] loss0.012-|Sample:17.92|
EPOCH[352/1000] loss0.012-|Sample:17.53|
EPOCH[353/1000] loss0.012-|Sample:17.46|
EPOCH[354/1000] loss0.012-|Sample:18.40|
EPOCH[355/1000] loss0.012-|Sample:16.81|
EPOCH[356/1000] loss0.012-|Sample:18.01|
EPOCH[357/1000] loss0.012-|Sample:18.46|
EPOCH[358/1000] loss0.012-|Sample:18.62|
EPOCH[359/1000] loss0.012-|Sample:18.32|
EPOCH[360/1000] loss0.012-|Sample:16.36|
[TEST]
{'precision': array([0.01643428]), 'recall': array([0.04007938]), 'ndcg': array([0.03088847])}
EPOCH[361/1000] loss0.012-|Sample:18.57|
EPOCH[362/1000] loss0.012-|Sample:16.11|
EPOCH[363/1000] loss0.012-|Sample:16.96|
EPOCH[364/1000] loss0.012-|Sample:17.57|
EPOCH[365/1000] loss0.012-|Sample:17.62|
EPOCH[366/1000] loss0.012-|Sample:17.86|
EPOCH[367/1000] loss0.012-|Sample:18.57|
EPOCH[368/1000] loss0.012-|Sample:16.82|
EPOCH[369/1000] loss0.012-|Sample:18.40|
EPOCH[370/1000] loss0.012-|Sample:17.17|
[TEST]
{'precision': array([0.01646468]), 'recall': array([0.0400994]), 'ndcg': array([0.03086786])}
EPOCH[371/1000] loss0.012-|Sample:17.14|
EPOCH[372/1000] loss0.012-|Sample:17.31|
EPOCH[373/1000] loss0.012-|Sample:16.64|
EPOCH[374/1000] loss0.012-|Sample:17.73|
EPOCH[375/1000] loss0.012-|Sample:16.07|
EPOCH[376/1000] loss0.012-|Sample:18.00|
EPOCH[377/1000] loss0.012-|Sample:19.06|
EPOCH[378/1000] loss0.012-|Sample:16.79|
EPOCH[379/1000] loss0.012-|Sample:16.86|
EPOCH[380/1000] loss0.012-|Sample:18.68|
[TEST]
{'precision': array([0.01649507]), 'recall': array([0.04020997]), 'ndcg': array([0.03104559])}
EPOCH[381/1000] loss0.012-|Sample:16.25|
EPOCH[382/1000] loss0.012-|Sample:18.78|
EPOCH[383/1000] loss0.012-|Sample:16.14|
EPOCH[384/1000] loss0.012-|Sample:17.84|
EPOCH[385/1000] loss0.012-|Sample:18.26|
EPOCH[386/1000] loss0.012-|Sample:17.43|
EPOCH[387/1000] loss0.012-|Sample:18.29|
EPOCH[388/1000] loss0.012-|Sample:16.45|
EPOCH[389/1000] loss0.012-|Sample:16.25|
EPOCH[390/1000] loss0.012-|Sample:16.29|
[TEST]
{'precision': array([0.01649317]), 'recall': array([0.04021768]), 'ndcg': array([0.03093946])}
EPOCH[391/1000] loss0.012-|Sample:17.31|
EPOCH[392/1000] loss0.012-|Sample:18.14|
EPOCH[393/1000] loss0.012-|Sample:17.50|
EPOCH[394/1000] loss0.012-|Sample:18.73|
EPOCH[395/1000] loss0.012-|Sample:18.57|
EPOCH[396/1000] loss0.012-|Sample:15.70|
EPOCH[397/1000] loss0.012-|Sample:15.54|
EPOCH[398/1000] loss0.012-|Sample:15.14|
EPOCH[399/1000] loss0.012-|Sample:15.57|
EPOCH[400/1000] loss0.012-|Sample:15.14|
[TEST]
{'precision': array([0.01647797]), 'recall': array([0.04014481]), 'ndcg': array([0.03104287])}
EPOCH[401/1000] loss0.012-|Sample:16.11|
EPOCH[402/1000] loss0.012-|Sample:15.25|
EPOCH[403/1000] loss0.012-|Sample:15.14|
EPOCH[404/1000] loss0.012-|Sample:15.37|
EPOCH[405/1000] loss0.012-|Sample:15.14|
EPOCH[406/1000] loss0.012-|Sample:15.62|
EPOCH[407/1000] loss0.012-|Sample:15.40|
EPOCH[408/1000] loss0.012-|Sample:15.39|
EPOCH[409/1000] loss0.012-|Sample:15.75|
EPOCH[410/1000] loss0.012-|Sample:15.00|
[TEST]
{'precision': array([0.01649222]), 'recall': array([0.04017267]), 'ndcg': array([0.03093065])}
EPOCH[411/1000] loss0.012-|Sample:15.25|
EPOCH[412/1000] loss0.012-|Sample:15.64|
EPOCH[413/1000] loss0.012-|Sample:15.65|
EPOCH[414/1000] loss0.012-|Sample:15.14|
EPOCH[415/1000] loss0.012-|Sample:15.34|
EPOCH[416/1000] loss0.012-|Sample:15.28|
EPOCH[417/1000] loss0.012-|Sample:15.03|
EPOCH[418/1000] loss0.012-|Sample:15.26|
EPOCH[419/1000] loss0.012-|Sample:14.98|
EPOCH[420/1000] loss0.012-|Sample:15.12|
[TEST]
{'precision': array([0.01642289]), 'recall': array([0.03989251]), 'ndcg': array([0.03086636])}
EPOCH[421/1000] loss0.012-|Sample:15.09|
EPOCH[422/1000] loss0.012-|Sample:16.04|
EPOCH[423/1000] loss0.012-|Sample:15.84|
EPOCH[424/1000] loss0.012-|Sample:14.95|
EPOCH[425/1000] loss0.012-|Sample:15.61|
EPOCH[426/1000] loss0.012-|Sample:15.87|
EPOCH[427/1000] loss0.012-|Sample:15.47|
EPOCH[428/1000] loss0.012-|Sample:15.39|
EPOCH[429/1000] loss0.012-|Sample:15.20|
EPOCH[430/1000] loss0.012-|Sample:15.90|
[TEST]
{'precision': array([0.01659195]), 'recall': array([0.04039196]), 'ndcg': array([0.03123563])}
EPOCH[431/1000] loss0.012-|Sample:15.57|
EPOCH[432/1000] loss0.012-|Sample:15.29|
EPOCH[433/1000] loss0.012-|Sample:15.82|
EPOCH[434/1000] loss0.012-|Sample:15.22|
EPOCH[435/1000] loss0.012-|Sample:15.25|
EPOCH[436/1000] loss0.012-|Sample:15.43|
EPOCH[437/1000] loss0.012-|Sample:15.73|
EPOCH[438/1000] loss0.012-|Sample:15.09|
EPOCH[439/1000] loss0.012-|Sample:16.06|
EPOCH[440/1000] loss0.012-|Sample:15.43|
[TEST]
{'precision': array([0.01654541]), 'recall': array([0.04021268]), 'ndcg': array([0.03112538])}
EPOCH[441/1000] loss0.012-|Sample:15.73|
EPOCH[442/1000] loss0.012-|Sample:14.98|
EPOCH[443/1000] loss0.012-|Sample:15.25|
EPOCH[444/1000] loss0.012-|Sample:15.40|
EPOCH[445/1000] loss0.012-|Sample:15.93|
EPOCH[446/1000] loss0.012-|Sample:16.06|
EPOCH[447/1000] loss0.012-|Sample:15.26|
EPOCH[448/1000] loss0.012-|Sample:15.48|
EPOCH[449/1000] loss0.012-|Sample:15.23|
EPOCH[450/1000] loss0.012-|Sample:15.65|
[TEST]
{'precision': array([0.0165796]), 'recall': array([0.04032146]), 'ndcg': array([0.03129313])}
EPOCH[451/1000] loss0.012-|Sample:15.82|
EPOCH[452/1000] loss0.012-|Sample:15.01|
EPOCH[453/1000] loss0.012-|Sample:15.45|
EPOCH[454/1000] loss0.012-|Sample:16.09|
EPOCH[455/1000] loss0.012-|Sample:15.09|
EPOCH[456/1000] loss0.012-|Sample:15.31|
EPOCH[457/1000] loss0.012-|Sample:14.93|
EPOCH[458/1000] loss0.012-|Sample:15.67|
EPOCH[459/1000] loss0.012-|Sample:15.40|
EPOCH[460/1000] loss0.012-|Sample:15.15|
[TEST]
{'precision': array([0.01662994]), 'recall': array([0.04043724]), 'ndcg': array([0.03125714])}
EPOCH[461/1000] loss0.012-|Sample:15.57|
EPOCH[462/1000] loss0.012-|Sample:15.22|
EPOCH[463/1000] loss0.012-|Sample:15.42|
EPOCH[464/1000] loss0.012-|Sample:16.14|
EPOCH[465/1000] loss0.012-|Sample:15.51|
EPOCH[466/1000] loss0.012-|Sample:15.07|
EPOCH[467/1000] loss0.012-|Sample:14.95|
EPOCH[468/1000] loss0.012-|Sample:15.50|
EPOCH[469/1000] loss0.012-|Sample:15.37|
EPOCH[470/1000] loss0.012-|Sample:15.47|
[TEST]
{'precision': array([0.01654066]), 'recall': array([0.04008399]), 'ndcg': array([0.03100064])}
EPOCH[471/1000] loss0.012-|Sample:15.23|
EPOCH[472/1000] loss0.012-|Sample:15.61|
EPOCH[473/1000] loss0.012-|Sample:15.29|
EPOCH[474/1000] loss0.012-|Sample:15.32|
EPOCH[475/1000] loss0.012-|Sample:15.42|
EPOCH[476/1000] loss0.012-|Sample:15.92|
EPOCH[477/1000] loss0.012-|Sample:16.51|
EPOCH[478/1000] loss0.012-|Sample:15.40|
EPOCH[479/1000] loss0.012-|Sample:14.97|
EPOCH[480/1000] loss0.012-|Sample:15.79|
[TEST]
{'precision': array([0.01658055]), 'recall': array([0.04025718]), 'ndcg': array([0.03118217])}
EPOCH[481/1000] loss0.012-|Sample:15.40|
EPOCH[482/1000] loss0.012-|Sample:15.51|
EPOCH[483/1000] loss0.012-|Sample:14.68|
EPOCH[484/1000] loss0.012-|Sample:15.61|
EPOCH[485/1000] loss0.012-|Sample:15.61|
EPOCH[486/1000] loss0.012-|Sample:15.54|
EPOCH[487/1000] loss0.012-|Sample:15.98|
EPOCH[488/1000] loss0.012-|Sample:15.65|
EPOCH[489/1000] loss0.012-|Sample:15.78|
EPOCH[490/1000] loss0.012-|Sample:15.06|
[TEST]
{'precision': array([0.01652451]), 'recall': array([0.04020115]), 'ndcg': array([0.03113373])}
EPOCH[491/1000] loss0.012-|Sample:15.12|
EPOCH[492/1000] loss0.012-|Sample:15.45|
EPOCH[493/1000] loss0.012-|Sample:15.22|
EPOCH[494/1000] loss0.012-|Sample:15.98|
EPOCH[495/1000] loss0.012-|Sample:15.22|
EPOCH[496/1000] loss0.012-|Sample:15.11|
EPOCH[497/1000] loss0.012-|Sample:15.18|
EPOCH[498/1000] loss0.012-|Sample:15.37|
EPOCH[499/1000] loss0.012-|Sample:15.39|
EPOCH[500/1000] loss0.012-|Sample:15.14|
[TEST]
{'precision': array([0.01654731]), 'recall': array([0.04025996]), 'ndcg': array([0.03121662])}
EPOCH[501/1000] loss0.012-|Sample:15.22|
EPOCH[502/1000] loss0.012-|Sample:15.47|
EPOCH[503/1000] loss0.012-|Sample:16.03|
EPOCH[504/1000] loss0.012-|Sample:15.76|
EPOCH[505/1000] loss0.012-|Sample:15.25|
EPOCH[506/1000] loss0.012-|Sample:15.18|
EPOCH[507/1000] loss0.012-|Sample:15.65|
EPOCH[508/1000] loss0.012-|Sample:15.18|
EPOCH[509/1000] loss0.012-|Sample:15.43|
EPOCH[510/1000] loss0.012-|Sample:15.17|
[TEST]
{'precision': array([0.01652546]), 'recall': array([0.04013799]), 'ndcg': array([0.0311087])}
EPOCH[511/1000] loss0.012-|Sample:15.87|
EPOCH[512/1000] loss0.012-|Sample:15.22|
EPOCH[513/1000] loss0.012-|Sample:15.78|
EPOCH[514/1000] loss0.012-|Sample:15.51|
EPOCH[515/1000] loss0.012-|Sample:15.32|
EPOCH[516/1000] loss0.012-|Sample:15.37|
EPOCH[517/1000] loss0.012-|Sample:15.22|
EPOCH[518/1000] loss0.012-|Sample:15.51|
EPOCH[519/1000] loss0.012-|Sample:15.31|
EPOCH[520/1000] loss0.012-|Sample:15.90|
[TEST]
{'precision': array([0.01659195]), 'recall': array([0.04026323]), 'ndcg': array([0.03121304])}
EPOCH[521/1000] loss0.012-|Sample:15.18|
EPOCH[522/1000] loss0.012-|Sample:15.72|
EPOCH[523/1000] loss0.012-|Sample:15.48|
EPOCH[524/1000] loss0.012-|Sample:14.97|
EPOCH[525/1000] loss0.012-|Sample:15.36|
EPOCH[526/1000] loss0.012-|Sample:15.34|
EPOCH[527/1000] loss0.012-|Sample:14.70|
EPOCH[528/1000] loss0.012-|Sample:14.04|
EPOCH[529/1000] loss0.012-|Sample:13.93|
EPOCH[530/1000] loss0.012-|Sample:14.23|
[TEST]
{'precision': array([0.0165853]), 'recall': array([0.04037348]), 'ndcg': array([0.03123246])}
EPOCH[531/1000] loss0.012-|Sample:13.51|
EPOCH[532/1000] loss0.012-|Sample:15.20|
EPOCH[533/1000] loss0.012-|Sample:14.43|
EPOCH[534/1000] loss0.012-|Sample:13.82|
EPOCH[535/1000] loss0.012-|Sample:15.18|
EPOCH[536/1000] loss0.012-|Sample:14.43|
EPOCH[537/1000] loss0.012-|Sample:14.45|
EPOCH[538/1000] loss0.012-|Sample:13.79|
EPOCH[539/1000] loss0.012-|Sample:14.45|
EPOCH[540/1000] loss0.012-|Sample:14.68|
[TEST]
{'precision': array([0.01663469]), 'recall': array([0.04057818]), 'ndcg': array([0.03124507])}
EPOCH[541/1000] loss0.012-|Sample:15.03|
EPOCH[542/1000] loss0.012-|Sample:14.04|
EPOCH[543/1000] loss0.012-|Sample:14.15|
EPOCH[544/1000] loss0.012-|Sample:13.67|
EPOCH[545/1000] loss0.012-|Sample:14.61|
EPOCH[546/1000] loss0.012-|Sample:14.73|
EPOCH[547/1000] loss0.012-|Sample:13.93|
EPOCH[548/1000] loss0.012-|Sample:14.73|
EPOCH[549/1000] loss0.012-|Sample:14.43|
EPOCH[550/1000] loss0.012-|Sample:13.73|
[TEST]
{'precision': array([0.01666603]), 'recall': array([0.04065438]), 'ndcg': array([0.03137921])}
EPOCH[551/1000] loss0.012-|Sample:14.36|
EPOCH[552/1000] loss0.012-|Sample:14.36|
EPOCH[553/1000] loss0.012-|Sample:14.22|
EPOCH[554/1000] loss0.012-|Sample:14.65|
EPOCH[555/1000] loss0.012-|Sample:14.01|
EPOCH[556/1000] loss0.012-|Sample:14.26|
EPOCH[557/1000] loss0.012-|Sample:14.61|
EPOCH[558/1000] loss0.012-|Sample:14.09|
EPOCH[559/1000] loss0.012-|Sample:14.15|
EPOCH[560/1000] loss0.012-|Sample:13.61|
[TEST]
{'precision': array([0.01670308]), 'recall': array([0.04070045]), 'ndcg': array([0.03144688])}
EPOCH[561/1000] loss0.012-|Sample:14.01|
EPOCH[562/1000] loss0.012-|Sample:14.50|
EPOCH[563/1000] loss0.012-|Sample:14.72|
EPOCH[564/1000] loss0.012-|Sample:13.97|
EPOCH[565/1000] loss0.012-|Sample:14.61|
EPOCH[566/1000] loss0.012-|Sample:14.62|
EPOCH[567/1000] loss0.012-|Sample:14.48|
EPOCH[568/1000] loss0.012-|Sample:14.26|
EPOCH[569/1000] loss0.012-|Sample:14.26|
EPOCH[570/1000] loss0.012-|Sample:14.93|
[TEST]
{'precision': array([0.01671352]), 'recall': array([0.04070811]), 'ndcg': array([0.03138617])}
EPOCH[571/1000] loss0.012-|Sample:14.75|
EPOCH[572/1000] loss0.012-|Sample:14.23|
EPOCH[573/1000] loss0.012-|Sample:14.32|
EPOCH[574/1000] loss0.012-|Sample:13.56|
EPOCH[575/1000] loss0.012-|Sample:14.32|
EPOCH[576/1000] loss0.012-|Sample:14.48|
EPOCH[577/1000] loss0.012-|Sample:13.95|
EPOCH[578/1000] loss0.012-|Sample:14.89|
EPOCH[579/1000] loss0.012-|Sample:14.43|
EPOCH[580/1000] loss0.012-|Sample:13.68|
[TEST]
{'precision': array([0.01671732]), 'recall': array([0.04072894]), 'ndcg': array([0.03135512])}
EPOCH[581/1000] loss0.012-|Sample:14.18|
EPOCH[582/1000] loss0.012-|Sample:14.53|
EPOCH[583/1000] loss0.012-|Sample:14.15|
EPOCH[584/1000] loss0.012-|Sample:14.48|
EPOCH[585/1000] loss0.012-|Sample:14.34|
EPOCH[586/1000] loss0.012-|Sample:14.18|
EPOCH[587/1000] loss0.012-|Sample:14.72|
EPOCH[588/1000] loss0.012-|Sample:14.14|
EPOCH[589/1000] loss0.012-|Sample:14.23|
EPOCH[590/1000] loss0.012-|Sample:13.53|
[TEST]
{'precision': array([0.01672017]), 'recall': array([0.04082401]), 'ndcg': array([0.03150535])}
EPOCH[591/1000] loss0.012-|Sample:14.22|
EPOCH[592/1000] loss0.012-|Sample:14.32|
EPOCH[593/1000] loss0.012-|Sample:14.64|
EPOCH[594/1000] loss0.012-|Sample:14.18|
EPOCH[595/1000] loss0.012-|Sample:14.34|
EPOCH[596/1000] loss0.012-|Sample:14.65|
EPOCH[597/1000] loss0.012-|Sample:14.59|
EPOCH[598/1000] loss0.012-|Sample:14.07|
EPOCH[599/1000] loss0.012-|Sample:14.18|
EPOCH[600/1000] loss0.012-|Sample:14.48|
[TEST]
{'precision': array([0.01671352]), 'recall': array([0.04084317]), 'ndcg': array([0.03149376])}
EPOCH[601/1000] loss0.012-|Sample:14.73|
EPOCH[602/1000] loss0.012-|Sample:14.34|
EPOCH[603/1000] loss0.012-|Sample:14.04|
EPOCH[604/1000] loss0.012-|Sample:13.53|
EPOCH[605/1000] loss0.012-|Sample:14.43|
EPOCH[606/1000] loss0.012-|Sample:14.68|
EPOCH[607/1000] loss0.012-|Sample:13.95|
EPOCH[608/1000] loss0.012-|Sample:14.36|
EPOCH[609/1000] loss0.012-|Sample:14.79|
EPOCH[610/1000] loss0.012-|Sample:13.79|
[TEST]
{'precision': array([0.01669073]), 'recall': array([0.0407453]), 'ndcg': array([0.03143452])}
EPOCH[611/1000] loss0.012-|Sample:14.73|
EPOCH[612/1000] loss0.012-|Sample:14.37|
EPOCH[613/1000] loss0.012-|Sample:14.01|
EPOCH[614/1000] loss0.012-|Sample:14.62|
EPOCH[615/1000] loss0.012-|Sample:14.23|
EPOCH[616/1000] loss0.012-|Sample:13.82|
EPOCH[617/1000] loss0.012-|Sample:14.79|
EPOCH[618/1000] loss0.012-|Sample:14.47|
EPOCH[619/1000] loss0.012-|Sample:14.26|
EPOCH[620/1000] loss0.012-|Sample:13.89|
[TEST]
{'precision': array([0.01669263]), 'recall': array([0.04069706]), 'ndcg': array([0.03136168])}
EPOCH[621/1000] loss0.012-|Sample:14.04|
EPOCH[622/1000] loss0.012-|Sample:14.25|
EPOCH[623/1000] loss0.012-|Sample:14.70|
EPOCH[624/1000] loss0.012-|Sample:13.84|
EPOCH[625/1000] loss0.012-|Sample:14.34|
EPOCH[626/1000] loss0.012-|Sample:14.42|
EPOCH[627/1000] loss0.012-|Sample:14.67|
EPOCH[628/1000] loss0.012-|Sample:14.61|
EPOCH[629/1000] loss0.012-|Sample:14.06|
EPOCH[630/1000] loss0.012-|Sample:14.67|
[TEST]
{'precision': array([0.01663184]), 'recall': array([0.04056521]), 'ndcg': array([0.03128765])}
EPOCH[631/1000] loss0.012-|Sample:14.15|
EPOCH[632/1000] loss0.012-|Sample:14.97|
EPOCH[633/1000] loss0.012-|Sample:13.68|
EPOCH[634/1000] loss0.012-|Sample:13.67|
EPOCH[635/1000] loss0.012-|Sample:14.28|
EPOCH[636/1000] loss0.012-|Sample:14.89|
EPOCH[637/1000] loss0.012-|Sample:14.03|
EPOCH[638/1000] loss0.012-|Sample:14.20|
EPOCH[639/1000] loss0.012-|Sample:14.64|
EPOCH[640/1000] loss0.012-|Sample:13.93|
[TEST]
{'precision': array([0.01665749]), 'recall': array([0.0407053]), 'ndcg': array([0.03145287])}
EPOCH[641/1000] loss0.012-|Sample:14.79|
EPOCH[642/1000] loss0.012-|Sample:14.43|
EPOCH[643/1000] loss0.012-|Sample:13.95|
EPOCH[644/1000] loss0.012-|Sample:14.56|
EPOCH[645/1000] loss0.012-|Sample:14.43|
EPOCH[646/1000] loss0.012-|Sample:13.64|
EPOCH[647/1000] loss0.012-|Sample:14.72|
EPOCH[648/1000] loss0.012-|Sample:14.78|
EPOCH[649/1000] loss0.012-|Sample:14.23|
EPOCH[650/1000] loss0.012-|Sample:13.86|
[TEST]
{'precision': array([0.01669263]), 'recall': array([0.04071801]), 'ndcg': array([0.03150527])}
EPOCH[651/1000] loss0.012-|Sample:14.50|
EPOCH[652/1000] loss0.012-|Sample:14.07|
EPOCH[653/1000] loss0.012-|Sample:14.93|
EPOCH[654/1000] loss0.012-|Sample:14.25|
EPOCH[655/1000] loss0.012-|Sample:14.07|
EPOCH[656/1000] loss0.012-|Sample:14.61|
EPOCH[657/1000] loss0.012-|Sample:14.76|
EPOCH[658/1000] loss0.012-|Sample:14.36|
EPOCH[659/1000] loss0.012-|Sample:14.15|
EPOCH[660/1000] loss0.012-|Sample:14.65|
[TEST]
{'precision': array([0.01670498]), 'recall': array([0.04070334]), 'ndcg': array([0.03140953])}
EPOCH[661/1000] loss0.012-|Sample:14.64|
EPOCH[662/1000] loss0.012-|Sample:14.48|
EPOCH[663/1000] loss0.012-|Sample:14.00|
EPOCH[664/1000] loss0.012-|Sample:13.95|
EPOCH[665/1000] loss0.012-|Sample:14.06|
EPOCH[666/1000] loss0.012-|Sample:14.54|
EPOCH[667/1000] loss0.012-|Sample:14.26|
EPOCH[668/1000] loss0.012-|Sample:14.45|
EPOCH[669/1000] loss0.012-|Sample:14.62|
EPOCH[670/1000] loss0.012-|Sample:14.11|
[TEST]
{'precision': array([0.01671637]), 'recall': array([0.04080101]), 'ndcg': array([0.03143839])}
EPOCH[671/1000] loss0.012-|Sample:14.61|
EPOCH[672/1000] loss0.012-|Sample:14.47|
EPOCH[673/1000] loss0.012-|Sample:14.12|
EPOCH[674/1000] loss0.012-|Sample:14.22|
EPOCH[675/1000] loss0.012-|Sample:14.90|
EPOCH[676/1000] loss0.012-|Sample:13.78|
EPOCH[677/1000] loss0.012-|Sample:14.78|
EPOCH[678/1000] loss0.012-|Sample:14.56|
EPOCH[679/1000] loss0.012-|Sample:14.18|
EPOCH[680/1000] loss0.012-|Sample:14.07|
[TEST]
{'precision': array([0.01670687]), 'recall': array([0.04075396]), 'ndcg': array([0.03148633])}
EPOCH[681/1000] loss0.012-|Sample:14.40|
EPOCH[682/1000] loss0.012-|Sample:14.09|
EPOCH[683/1000] loss0.012-|Sample:14.68|
EPOCH[684/1000] loss0.012-|Sample:14.34|
EPOCH[685/1000] loss0.012-|Sample:14.14|
EPOCH[686/1000] loss0.012-|Sample:14.97|
EPOCH[687/1000] loss0.012-|Sample:14.48|
EPOCH[688/1000] loss0.012-|Sample:14.78|
EPOCH[689/1000] loss0.012-|Sample:13.95|
EPOCH[690/1000] loss0.012-|Sample:14.40|
[TEST]
{'precision': array([0.01668883]), 'recall': array([0.04058135]), 'ndcg': array([0.03143589])}
EPOCH[691/1000] loss0.012-|Sample:14.22|
EPOCH[692/1000] loss0.012-|Sample:14.32|
EPOCH[693/1000] loss0.012-|Sample:14.48|
EPOCH[694/1000] loss0.012-|Sample:14.25|
EPOCH[695/1000] loss0.012-|Sample:13.87|
EPOCH[696/1000] loss0.012-|Sample:14.87|
EPOCH[697/1000] loss0.012-|Sample:14.57|
EPOCH[698/1000] loss0.012-|Sample:13.93|
EPOCH[699/1000] loss0.012-|Sample:14.78|
EPOCH[700/1000] loss0.012-|Sample:14.11|
[TEST]
{'precision': array([0.01686264]), 'recall': array([0.04109731]), 'ndcg': array([0.0316881])}
EPOCH[701/1000] loss0.012-|Sample:14.72|
EPOCH[702/1000] loss0.012-|Sample:14.56|
EPOCH[703/1000] loss0.012-|Sample:14.18|
EPOCH[704/1000] loss0.012-|Sample:14.14|
EPOCH[705/1000] loss0.012-|Sample:14.32|
EPOCH[706/1000] loss0.012-|Sample:14.14|
EPOCH[707/1000] loss0.012-|Sample:14.26|
EPOCH[708/1000] loss0.012-|Sample:14.89|
EPOCH[709/1000] loss0.012-|Sample:14.67|
EPOCH[710/1000] loss0.012-|Sample:14.42|
[TEST]
{'precision': array([0.01674107]), 'recall': array([0.04082718]), 'ndcg': array([0.03153181])}
EPOCH[711/1000] loss0.012-|Sample:15.22|
EPOCH[712/1000] loss0.012-|Sample:13.76|
EPOCH[713/1000] loss0.012-|Sample:14.50|
EPOCH[714/1000] loss0.012-|Sample:14.79|
EPOCH[715/1000] loss0.012-|Sample:13.84|
EPOCH[716/1000] loss0.012-|Sample:14.64|
EPOCH[717/1000] loss0.012-|Sample:14.42|
EPOCH[718/1000] loss0.012-|Sample:14.50|
EPOCH[719/1000] loss0.012-|Sample:14.11|
EPOCH[720/1000] loss0.012-|Sample:14.47|
[TEST]
{'precision': array([0.01671162]), 'recall': array([0.04075236]), 'ndcg': array([0.03144949])}
EPOCH[721/1000] loss0.012-|Sample:13.93|
EPOCH[722/1000] loss0.012-|Sample:14.59|
EPOCH[723/1000] loss0.012-|Sample:14.47|
EPOCH[724/1000] loss0.012-|Sample:14.29|
EPOCH[725/1000] loss0.012-|Sample:14.14|
EPOCH[726/1000] loss0.012-|Sample:14.65|
EPOCH[727/1000] loss0.012-|Sample:15.06|
EPOCH[728/1000] loss0.012-|Sample:17.78|
EPOCH[729/1000] loss0.012-|Sample:15.07|
EPOCH[730/1000] loss0.012-|Sample:15.47|
[TEST]
{'precision': array([0.01668313]), 'recall': array([0.04063323]), 'ndcg': array([0.03136581])}
EPOCH[731/1000] loss0.012-|Sample:15.42|
EPOCH[732/1000] loss0.012-|Sample:15.64|
EPOCH[733/1000] loss0.012-|Sample:15.75|
EPOCH[734/1000] loss0.012-|Sample:15.72|
EPOCH[735/1000] loss0.012-|Sample:15.25|
EPOCH[736/1000] loss0.012-|Sample:15.07|
EPOCH[737/1000] loss0.012-|Sample:15.03|
EPOCH[738/1000] loss0.012-|Sample:15.45|
EPOCH[739/1000] loss0.012-|Sample:15.70|
EPOCH[740/1000] loss0.012-|Sample:15.29|
[TEST]
{'precision': array([0.01677811]), 'recall': array([0.04100867]), 'ndcg': array([0.03152914])}
EPOCH[741/1000] loss0.012-|Sample:15.32|
EPOCH[742/1000] loss0.012-|Sample:14.90|
EPOCH[743/1000] loss0.012-|Sample:15.64|
EPOCH[744/1000] loss0.012-|Sample:15.14|
EPOCH[745/1000] loss0.012-|Sample:16.14|
EPOCH[746/1000] loss0.012-|Sample:15.78|
EPOCH[747/1000] loss0.012-|Sample:15.23|
EPOCH[748/1000] loss0.012-|Sample:15.42|
EPOCH[749/1000] loss0.012-|Sample:15.09|
EPOCH[750/1000] loss0.012-|Sample:14.98|
[TEST]
{'precision': array([0.01670498]), 'recall': array([0.04085339]), 'ndcg': array([0.03145646])}
EPOCH[751/1000] loss0.012-|Sample:15.11|
EPOCH[752/1000] loss0.012-|Sample:15.51|
EPOCH[753/1000] loss0.012-|Sample:15.48|
EPOCH[754/1000] loss0.012-|Sample:15.39|
EPOCH[755/1000] loss0.012-|Sample:15.75|
EPOCH[756/1000] loss0.012-|Sample:15.09|
EPOCH[757/1000] loss0.012-|Sample:15.25|
EPOCH[758/1000] loss0.012-|Sample:15.98|
EPOCH[759/1000] loss0.012-|Sample:15.72|
EPOCH[760/1000] loss0.012-|Sample:15.65|
[TEST]
{'precision': array([0.01672587]), 'recall': array([0.04094354]), 'ndcg': array([0.03147395])}
EPOCH[761/1000] loss0.012-|Sample:15.11|
EPOCH[762/1000] loss0.012-|Sample:15.00|
EPOCH[763/1000] loss0.012-|Sample:15.73|
EPOCH[764/1000] loss0.012-|Sample:17.06|
EPOCH[765/1000] loss0.012-|Sample:17.86|
EPOCH[766/1000] loss0.012-|Sample:17.57|
EPOCH[767/1000] loss0.012-|Sample:18.31|
EPOCH[768/1000] loss0.012-|Sample:19.32|
EPOCH[769/1000] loss0.012-|Sample:17.01|
EPOCH[770/1000] loss0.012-|Sample:17.95|
[TEST]
{'precision': array([0.01672492]), 'recall': array([0.0408251]), 'ndcg': array([0.03153037])}
EPOCH[771/1000] loss0.012-|Sample:16.62|
EPOCH[772/1000] loss0.012-|Sample:19.07|
EPOCH[773/1000] loss0.012-|Sample:17.09|
EPOCH[774/1000] loss0.012-|Sample:17.39|
EPOCH[775/1000] loss0.012-|Sample:17.51|
EPOCH[776/1000] loss0.012-|Sample:17.65|
EPOCH[777/1000] loss0.012-|Sample:16.46|
EPOCH[778/1000] loss0.012-|Sample:18.31|
EPOCH[779/1000] loss0.012-|Sample:17.06|
EPOCH[780/1000] loss0.012-|Sample:16.40|
[TEST]
{'precision': array([0.01670213]), 'recall': array([0.04064025]), 'ndcg': array([0.03141971])}
EPOCH[781/1000] loss0.012-|Sample:16.96|
EPOCH[782/1000] loss0.012-|Sample:17.21|
EPOCH[783/1000] loss0.012-|Sample:18.78|
EPOCH[784/1000] loss0.012-|Sample:16.79|
EPOCH[785/1000] loss0.012-|Sample:17.34|
EPOCH[786/1000] loss0.012-|Sample:17.20|
EPOCH[787/1000] loss0.012-|Sample:17.18|
EPOCH[788/1000] loss0.012-|Sample:18.79|
EPOCH[789/1000] loss0.012-|Sample:18.73|
EPOCH[790/1000] loss0.012-|Sample:17.39|
[TEST]
{'precision': array([0.01671922]), 'recall': array([0.04074389]), 'ndcg': array([0.03139685])}
EPOCH[791/1000] loss0.012-|Sample:16.78|
EPOCH[792/1000] loss0.012-|Sample:17.18|
EPOCH[793/1000] loss0.012-|Sample:19.01|
EPOCH[794/1000] loss0.012-|Sample:16.76|
EPOCH[795/1000] loss0.012-|Sample:17.29|
EPOCH[796/1000] loss0.012-|Sample:18.23|
EPOCH[797/1000] loss0.012-|Sample:17.15|
EPOCH[798/1000] loss0.012-|Sample:16.92|
EPOCH[799/1000] loss0.012-|Sample:17.92|
EPOCH[800/1000] loss0.012-|Sample:17.07|
[TEST]
{'precision': array([0.01673157]), 'recall': array([0.0408724]), 'ndcg': array([0.03148725])}
EPOCH[801/1000] loss0.012-|Sample:16.68|
EPOCH[802/1000] loss0.012-|Sample:16.81|
EPOCH[803/1000] loss0.012-|Sample:18.68|
EPOCH[804/1000] loss0.012-|Sample:19.25|
EPOCH[805/1000] loss0.012-|Sample:17.34|
EPOCH[806/1000] loss0.012-|Sample:19.45|
EPOCH[807/1000] loss0.012-|Sample:16.65|
EPOCH[808/1000] loss0.012-|Sample:16.45|
EPOCH[809/1000] loss0.012-|Sample:17.90|
EPOCH[810/1000] loss0.012-|Sample:17.09|
[TEST]
{'precision': array([0.01668028]), 'recall': array([0.04079387]), 'ndcg': array([0.0314944])}
EPOCH[811/1000] loss0.012-|Sample:18.39|
EPOCH[812/1000] loss0.012-|Sample:17.03|
EPOCH[813/1000] loss0.012-|Sample:17.39|
EPOCH[814/1000] loss0.012-|Sample:18.01|
EPOCH[815/1000] loss0.012-|Sample:16.68|
EPOCH[816/1000] loss0.012-|Sample:19.15|
EPOCH[817/1000] loss0.012-|Sample:17.23|
EPOCH[818/1000] loss0.012-|Sample:18.01|
EPOCH[819/1000] loss0.012-|Sample:17.03|
EPOCH[820/1000] loss0.012-|Sample:17.21|
[TEST]
{'precision': array([0.01680185]), 'recall': array([0.04105829]), 'ndcg': array([0.0316211])}
EPOCH[821/1000] loss0.012-|Sample:16.81|
EPOCH[822/1000] loss0.012-|Sample:18.81|
EPOCH[823/1000] loss0.012-|Sample:17.00|
EPOCH[824/1000] loss0.012-|Sample:18.07|
EPOCH[825/1000] loss0.012-|Sample:19.37|
EPOCH[826/1000] loss0.012-|Sample:16.65|
EPOCH[827/1000] loss0.012-|Sample:16.78|
EPOCH[828/1000] loss0.012-|Sample:17.54|
EPOCH[829/1000] loss0.012-|Sample:17.61|
EPOCH[830/1000] loss0.012-|Sample:19.03|
[TEST]
{'precision': array([0.016837]), 'recall': array([0.040956]), 'ndcg': array([0.03156834])}
EPOCH[831/1000] loss0.012-|Sample:16.76|
EPOCH[832/1000] loss0.012-|Sample:16.70|
EPOCH[833/1000] loss0.012-|Sample:19.43|
EPOCH[834/1000] loss0.012-|Sample:16.64|
EPOCH[835/1000] loss0.012-|Sample:17.01|
EPOCH[836/1000] loss0.012-|Sample:17.29|
EPOCH[837/1000] loss0.012-|Sample:16.64|
EPOCH[838/1000] loss0.012-|Sample:15.36|
EPOCH[839/1000] loss0.012-|Sample:16.25|
EPOCH[840/1000] loss0.012-|Sample:14.57|
[TEST]
{'precision': array([0.01678191]), 'recall': array([0.04081071]), 'ndcg': array([0.03153354])}
EPOCH[841/1000] loss0.012-|Sample:15.56|
EPOCH[842/1000] loss0.012-|Sample:15.20|
EPOCH[843/1000] loss0.012-|Sample:15.26|
EPOCH[844/1000] loss0.012-|Sample:15.29|
EPOCH[845/1000] loss0.012-|Sample:14.95|
EPOCH[846/1000] loss0.012-|Sample:15.84|
EPOCH[847/1000] loss0.012-|Sample:14.98|
EPOCH[848/1000] loss0.012-|Sample:15.42|
EPOCH[849/1000] loss0.012-|Sample:15.15|
EPOCH[850/1000] loss0.012-|Sample:14.92|
[TEST]
{'precision': array([0.01670308]), 'recall': array([0.04057042]), 'ndcg': array([0.03143795])}
EPOCH[851/1000] loss0.012-|Sample:15.73|
EPOCH[852/1000] loss0.012-|Sample:15.34|
EPOCH[853/1000] loss0.012-|Sample:16.37|
EPOCH[854/1000] loss0.012-|Sample:15.81|
EPOCH[855/1000] loss0.012-|Sample:15.22|
EPOCH[856/1000] loss0.012-|Sample:15.57|
EPOCH[857/1000] loss0.012-|Sample:15.11|
EPOCH[858/1000] loss0.012-|Sample:15.42|
EPOCH[859/1000] loss0.012-|Sample:15.14|
EPOCH[860/1000] loss0.012-|Sample:15.06|
[TEST]
{'precision': array([0.01676006]), 'recall': array([0.04094531]), 'ndcg': array([0.03156584])}
EPOCH[861/1000] loss0.012-|Sample:15.15|
EPOCH[862/1000] loss0.012-|Sample:15.37|
EPOCH[863/1000] loss0.012-|Sample:15.15|
EPOCH[864/1000] loss0.012-|Sample:15.65|
EPOCH[865/1000] loss0.012-|Sample:15.37|
EPOCH[866/1000] loss0.012-|Sample:15.28|
EPOCH[867/1000] loss0.012-|Sample:15.73|
EPOCH[868/1000] loss0.012-|Sample:15.25|
EPOCH[869/1000] loss0.012-|Sample:15.00|
EPOCH[870/1000] loss0.012-|Sample:15.50|
[TEST]
{'precision': array([0.01665369]), 'recall': array([0.0405991]), 'ndcg': array([0.0313551])}
EPOCH[871/1000] loss0.012-|Sample:15.11|
EPOCH[872/1000] loss0.012-|Sample:15.53|
EPOCH[873/1000] loss0.012-|Sample:15.26|
EPOCH[874/1000] loss0.012-|Sample:15.00|
EPOCH[875/1000] loss0.012-|Sample:15.79|
EPOCH[876/1000] loss0.012-|Sample:14.79|
EPOCH[877/1000] loss0.012-|Sample:14.92|
EPOCH[878/1000] loss0.012-|Sample:15.34|
EPOCH[879/1000] loss0.012-|Sample:15.22|
EPOCH[880/1000] loss0.012-|Sample:15.29|
[TEST]
{'precision': array([0.01668978]), 'recall': array([0.0408916]), 'ndcg': array([0.03149569])}
EPOCH[881/1000] loss0.012-|Sample:15.32|
EPOCH[882/1000] loss0.012-|Sample:15.81|
EPOCH[883/1000] loss0.012-|Sample:15.54|
EPOCH[884/1000] loss0.012-|Sample:15.25|
EPOCH[885/1000] loss0.012-|Sample:15.56|
EPOCH[886/1000] loss0.012-|Sample:15.51|
EPOCH[887/1000] loss0.012-|Sample:15.34|
EPOCH[888/1000] loss0.012-|Sample:15.67|
EPOCH[889/1000] loss0.012-|Sample:15.48|
EPOCH[890/1000] loss0.012-|Sample:14.11|
[TEST]
{'precision': array([0.01667838]), 'recall': array([0.04071106]), 'ndcg': array([0.0313498])}
EPOCH[891/1000] loss0.012-|Sample:14.56|
EPOCH[892/1000] loss0.012-|Sample:14.37|
EPOCH[893/1000] loss0.012-|Sample:14.26|
EPOCH[894/1000] loss0.012-|Sample:14.56|
EPOCH[895/1000] loss0.012-|Sample:14.61|
EPOCH[896/1000] loss0.012-|Sample:14.64|
EPOCH[897/1000] loss0.012-|Sample:14.39|
EPOCH[898/1000] loss0.012-|Sample:14.79|
EPOCH[899/1000] loss0.012-|Sample:14.56|
EPOCH[900/1000] loss0.012-|Sample:14.12|
[TEST]
{'precision': array([0.01681135]), 'recall': array([0.04110766]), 'ndcg': array([0.03163509])}
EPOCH[901/1000] loss0.012-|Sample:14.23|
EPOCH[902/1000] loss0.012-|Sample:14.18|
EPOCH[903/1000] loss0.012-|Sample:14.50|
EPOCH[904/1000] loss0.012-|Sample:14.70|
EPOCH[905/1000] loss0.012-|Sample:14.40|
EPOCH[906/1000] loss0.012-|Sample:14.40|
EPOCH[907/1000] loss0.012-|Sample:14.54|
EPOCH[908/1000] loss0.012-|Sample:14.43|
EPOCH[909/1000] loss0.012-|Sample:14.47|
EPOCH[910/1000] loss0.012-|Sample:14.43|
[TEST]
{'precision': array([0.01678096]), 'recall': array([0.04094572]), 'ndcg': array([0.03151379])}
EPOCH[911/1000] loss0.012-|Sample:14.62|
EPOCH[912/1000] loss0.012-|Sample:13.93|
EPOCH[913/1000] loss0.012-|Sample:14.59|
EPOCH[914/1000] loss0.012-|Sample:14.56|
EPOCH[915/1000] loss0.011-|Sample:14.43|
EPOCH[916/1000] loss0.012-|Sample:14.47|
EPOCH[917/1000] loss0.012-|Sample:14.26|
EPOCH[918/1000] loss0.012-|Sample:14.39|
EPOCH[919/1000] loss0.012-|Sample:14.56|
EPOCH[920/1000] loss0.012-|Sample:14.37|
[TEST]
{'precision': array([0.01678476]), 'recall': array([0.0409744]), 'ndcg': array([0.03155825])}
EPOCH[921/1000] loss0.012-|Sample:14.51|
EPOCH[922/1000] loss0.012-|Sample:14.15|
EPOCH[923/1000] loss0.012-|Sample:14.32|
EPOCH[924/1000] loss0.012-|Sample:14.01|
EPOCH[925/1000] loss0.012-|Sample:14.45|
EPOCH[926/1000] loss0.012-|Sample:14.68|
EPOCH[927/1000] loss0.012-|Sample:14.54|
EPOCH[928/1000] loss0.012-|Sample:14.65|
EPOCH[929/1000] loss0.012-|Sample:14.37|
EPOCH[930/1000] loss0.011-|Sample:14.23|
[TEST]
{'precision': array([0.01679521]), 'recall': array([0.04092938]), 'ndcg': array([0.0314294])}
EPOCH[931/1000] loss0.012-|Sample:14.28|
EPOCH[932/1000] loss0.012-|Sample:14.40|
EPOCH[933/1000] loss0.012-|Sample:14.42|
EPOCH[934/1000] loss0.012-|Sample:14.39|
EPOCH[935/1000] loss0.012-|Sample:14.51|
EPOCH[936/1000] loss0.012-|Sample:14.45|
EPOCH[937/1000] loss0.012-|Sample:14.69|
EPOCH[938/1000] loss0.012-|Sample:14.43|
EPOCH[939/1000] loss0.012-|Sample:14.59|
EPOCH[940/1000] loss0.012-|Sample:14.70|
[TEST]
{'precision': array([0.01679805]), 'recall': array([0.04103695]), 'ndcg': array([0.03163295])}
EPOCH[941/1000] loss0.012-|Sample:14.70|
EPOCH[942/1000] loss0.012-|Sample:14.28|
EPOCH[943/1000] loss0.012-|Sample:14.75|
EPOCH[944/1000] loss0.012-|Sample:15.17|
EPOCH[945/1000] loss0.012-|Sample:14.32|
EPOCH[946/1000] loss0.012-|Sample:14.20|
EPOCH[947/1000] loss0.012-|Sample:14.29|
EPOCH[948/1000] loss0.012-|Sample:15.03|
EPOCH[949/1000] loss0.012-|Sample:14.01|
EPOCH[950/1000] loss0.012-|Sample:14.04|
[TEST]
{'precision': array([0.01678666]), 'recall': array([0.04089822]), 'ndcg': array([0.03160143])}
EPOCH[951/1000] loss0.012-|Sample:14.25|
EPOCH[952/1000] loss0.012-|Sample:14.56|
EPOCH[953/1000] loss0.012-|Sample:14.40|
EPOCH[954/1000] loss0.012-|Sample:14.31|
EPOCH[955/1000] loss0.012-|Sample:14.07|
EPOCH[956/1000] loss0.012-|Sample:15.29|
EPOCH[957/1000] loss0.012-|Sample:14.04|
EPOCH[958/1000] loss0.012-|Sample:14.79|
EPOCH[959/1000] loss0.012-|Sample:15.12|
EPOCH[960/1000] loss0.012-|Sample:13.95|
[TEST]
{'precision': array([0.01678951]), 'recall': array([0.04096262]), 'ndcg': array([0.03160291])}
EPOCH[961/1000] loss0.012-|Sample:13.98|
EPOCH[962/1000] loss0.012-|Sample:14.64|
EPOCH[963/1000] loss0.012-|Sample:14.15|
EPOCH[964/1000] loss0.012-|Sample:14.92|
EPOCH[965/1000] loss0.012-|Sample:14.20|
EPOCH[966/1000] loss0.012-|Sample:14.25|
EPOCH[967/1000] loss0.012-|Sample:14.37|
EPOCH[968/1000] loss0.012-|Sample:14.09|
EPOCH[969/1000] loss0.012-|Sample:13.98|
EPOCH[970/1000] loss0.012-|Sample:13.31|
[TEST]
{'precision': array([0.0168009]), 'recall': array([0.04103263]), 'ndcg': array([0.03162353])}
EPOCH[971/1000] loss0.012-|Sample:13.01|
EPOCH[972/1000] loss0.012-|Sample:13.20|
EPOCH[973/1000] loss0.012-|Sample:13.15|
EPOCH[974/1000] loss0.011-|Sample:13.20|
EPOCH[975/1000] loss0.012-|Sample:13.51|
EPOCH[976/1000] loss0.012-|Sample:13.14|
EPOCH[977/1000] loss0.012-|Sample:13.25|
EPOCH[978/1000] loss0.012-|Sample:13.33|
EPOCH[979/1000] loss0.012-|Sample:13.17|
EPOCH[980/1000] loss0.012-|Sample:13.26|
[TEST]
{'precision': array([0.01686359]), 'recall': array([0.04113825]), 'ndcg': array([0.03172849])}
EPOCH[981/1000] loss0.012-|Sample:13.18|
EPOCH[982/1000] loss0.012-|Sample:13.39|
EPOCH[983/1000] loss0.012-|Sample:13.29|
EPOCH[984/1000] loss0.012-|Sample:13.15|
EPOCH[985/1000] loss0.012-|Sample:13.36|
EPOCH[986/1000] loss0.012-|Sample:13.42|
EPOCH[987/1000] loss0.012-|Sample:13.36|
EPOCH[988/1000] loss0.012-|Sample:13.34|
EPOCH[989/1000] loss0.012-|Sample:13.43|
EPOCH[990/1000] loss0.012-|Sample:13.23|
[TEST]
{'precision': array([0.01678951]), 'recall': array([0.04093716]), 'ndcg': array([0.03156075])}
EPOCH[991/1000] loss0.012-|Sample:13.45|
EPOCH[992/1000] loss0.012-|Sample:13.08|
EPOCH[993/1000] loss0.011-|Sample:13.29|
EPOCH[994/1000] loss0.012-|Sample:13.39|
EPOCH[995/1000] loss0.012-|Sample:13.15|
EPOCH[996/1000] loss0.012-|Sample:13.42|
EPOCH[997/1000] loss0.012-|Sample:13.48|
EPOCH[998/1000] loss0.012-|Sample:13.47|
EPOCH[999/1000] loss0.012-|Sample:13.31|
EPOCH[1000/1000] loss0.012-|Sample:13.23|

Process finished with exit code 0


model:mf layer:2
D:\ProgramFiles\Anaconda3\envs\image_caption_python36\python.exe D:/workspace/LightGcn/LightGCN-PyTorch-master/code/main.py
Cpp extension not loaded
>>SEED: 2020
loading [../data/amazon-book]
2380730 interactions for training
603382 interactions for testing
amazon-book Sparsity : 0.0006188476640083725
amazon-book is ready to go
===========config================
{'A_n_fold': 100,
 'A_split': False,
 'bigdata': False,
 'bpr_batch_size': 2048,
 'decay': 0.0001,
 'dropout': 0,
 'keep_prob': 0.6,
 'latent_dim_rec': 64,
 'lightGCN_n_layers': 2,
 'lr': 0.001,
 'multicore': 0,
 'pretrain': 0,
 'test_u_batch_size': 100}
cores for test: 6
comment: lgn
tensorboard: 1
LOAD: 0
Weight path: ./checkpoints
Test Topks: [20]
using bpr loss
===========end===================
using Normal distribution N(0,1) initialization for PureMF
load and save to /home/qhc/下载/LightGCN-PyTorch-master\code\checkpoints\mf-amazon-book-64.pth.tar
[TEST]
{'precision': array([0.00018521]), 'recall': array([0.0003439]), 'ndcg': array([0.00027584])}
EPOCH[1/1000] loss4.358-|Sample:13.26|
EPOCH[2/1000] loss3.931-|Sample:14.72|
EPOCH[3/1000] loss3.555-|Sample:13.50|
EPOCH[4/1000] loss3.207-|Sample:14.70|
EPOCH[5/1000] loss2.908-|Sample:14.12|
EPOCH[6/1000] loss2.642-|Sample:14.28|
EPOCH[7/1000] loss2.406-|Sample:14.47|
EPOCH[8/1000] loss2.185-|Sample:14.09|
EPOCH[9/1000] loss2.000-|Sample:14.45|
EPOCH[10/1000] loss1.827-|Sample:13.76|
[TEST]
{'precision': array([0.00010828]), 'recall': array([0.00022261]), 'ndcg': array([0.0001609])}
EPOCH[11/1000] loss1.678-|Sample:14.17|
EPOCH[12/1000] loss1.546-|Sample:14.40|
EPOCH[13/1000] loss1.416-|Sample:14.48|
EPOCH[14/1000] loss1.304-|Sample:13.93|
EPOCH[15/1000] loss1.203-|Sample:14.45|
EPOCH[16/1000] loss1.113-|Sample:14.42|
EPOCH[17/1000] loss1.029-|Sample:13.75|
EPOCH[18/1000] loss0.949-|Sample:14.40|
EPOCH[19/1000] loss0.876-|Sample:13.89|
EPOCH[20/1000] loss0.813-|Sample:14.37|
[TEST]
{'precision': array([0.00017096]), 'recall': array([0.00033474]), 'ndcg': array([0.00027928])}
EPOCH[21/1000] loss0.753-|Sample:14.42|
EPOCH[22/1000] loss0.699-|Sample:14.34|
EPOCH[23/1000] loss0.648-|Sample:14.04|
EPOCH[24/1000] loss0.599-|Sample:14.73|
EPOCH[25/1000] loss0.560-|Sample:13.70|
EPOCH[26/1000] loss0.521-|Sample:14.48|
EPOCH[27/1000] loss0.484-|Sample:14.30|
EPOCH[28/1000] loss0.450-|Sample:14.56|
EPOCH[29/1000] loss0.421-|Sample:14.67|
EPOCH[30/1000] loss0.394-|Sample:13.90|
[TEST]
{'precision': array([0.00059362]), 'recall': array([0.00100332]), 'ndcg': array([0.00084127])}
EPOCH[31/1000] loss0.369-|Sample:13.97|
EPOCH[32/1000] loss0.343-|Sample:14.42|
EPOCH[33/1000] loss0.322-|Sample:14.87|
EPOCH[34/1000] loss0.302-|Sample:13.98|
EPOCH[35/1000] loss0.284-|Sample:14.37|
EPOCH[36/1000] loss0.266-|Sample:13.70|
EPOCH[37/1000] loss0.250-|Sample:14.68|
EPOCH[38/1000] loss0.236-|Sample:14.31|
EPOCH[39/1000] loss0.222-|Sample:13.59|
EPOCH[40/1000] loss0.210-|Sample:14.39|
[TEST]
{'precision': array([0.00124898]), 'recall': array([0.0020309]), 'ndcg': array([0.00181388])}
EPOCH[41/1000] loss0.198-|Sample:14.62|
EPOCH[42/1000] loss0.187-|Sample:14.61|
EPOCH[43/1000] loss0.177-|Sample:13.98|
EPOCH[44/1000] loss0.167-|Sample:14.79|
EPOCH[45/1000] loss0.159-|Sample:13.70|
EPOCH[46/1000] loss0.151-|Sample:14.40|
EPOCH[47/1000] loss0.143-|Sample:14.09|
EPOCH[48/1000] loss0.137-|Sample:14.45|
EPOCH[49/1000] loss0.130-|Sample:14.47|
EPOCH[50/1000] loss0.124-|Sample:13.95|
[TEST]
{'precision': array([0.00174477]), 'recall': array([0.00270818]), 'ndcg': array([0.00252882])}
EPOCH[51/1000] loss0.118-|Sample:14.15|
EPOCH[52/1000] loss0.112-|Sample:14.45|
EPOCH[53/1000] loss0.108-|Sample:14.56|
EPOCH[54/1000] loss0.103-|Sample:13.90|
EPOCH[55/1000] loss0.099-|Sample:14.68|
EPOCH[56/1000] loss0.095-|Sample:13.82|
EPOCH[57/1000] loss0.091-|Sample:14.45|
EPOCH[58/1000] loss0.087-|Sample:13.79|
EPOCH[59/1000] loss0.084-|Sample:14.47|
EPOCH[60/1000] loss0.081-|Sample:14.68|
[TEST]
{'precision': array([0.00216743]), 'recall': array([0.00332985]), 'ndcg': array([0.00316102])}
EPOCH[61/1000] loss0.079-|Sample:14.09|
EPOCH[62/1000] loss0.076-|Sample:14.95|
EPOCH[63/1000] loss0.073-|Sample:13.78|
EPOCH[64/1000] loss0.070-|Sample:14.61|
EPOCH[65/1000] loss0.068-|Sample:13.73|
EPOCH[66/1000] loss0.066-|Sample:14.61|
EPOCH[67/1000] loss0.064-|Sample:13.95|
EPOCH[68/1000] loss0.062-|Sample:14.42|
EPOCH[69/1000] loss0.060-|Sample:14.75|
EPOCH[70/1000] loss0.059-|Sample:14.11|
[TEST]
{'precision': array([0.00246092]), 'recall': array([0.00376273]), 'ndcg': array([0.00354986])}
EPOCH[71/1000] loss0.057-|Sample:14.12|
EPOCH[72/1000] loss0.056-|Sample:14.40|
EPOCH[73/1000] loss0.054-|Sample:14.57|
EPOCH[74/1000] loss0.052-|Sample:14.25|
EPOCH[75/1000] loss0.051-|Sample:14.43|
EPOCH[76/1000] loss0.050-|Sample:13.72|
EPOCH[77/1000] loss0.050-|Sample:14.95|
EPOCH[78/1000] loss0.047-|Sample:13.82|
EPOCH[79/1000] loss0.047-|Sample:14.50|
EPOCH[80/1000] loss0.045-|Sample:14.23|
[TEST]
{'precision': array([0.00276295]), 'recall': array([0.00433682]), 'ndcg': array([0.00405484])}
EPOCH[81/1000] loss0.045-|Sample:14.42|
EPOCH[82/1000] loss0.044-|Sample:14.37|
EPOCH[83/1000] loss0.043-|Sample:13.79|
EPOCH[84/1000] loss0.042-|Sample:14.37|
EPOCH[85/1000] loss0.041-|Sample:13.92|
EPOCH[86/1000] loss0.040-|Sample:14.78|
EPOCH[87/1000] loss0.040-|Sample:14.40|
EPOCH[88/1000] loss0.039-|Sample:13.87|
EPOCH[89/1000] loss0.038-|Sample:14.62|
EPOCH[90/1000] loss0.038-|Sample:13.73|
[TEST]
{'precision': array([0.00298425]), 'recall': array([0.00485481]), 'ndcg': array([0.00442347])}
EPOCH[91/1000] loss0.037-|Sample:14.18|
EPOCH[92/1000] loss0.036-|Sample:14.34|
EPOCH[93/1000] loss0.036-|Sample:14.70|
EPOCH[94/1000] loss0.035-|Sample:13.89|
EPOCH[95/1000] loss0.034-|Sample:14.53|
EPOCH[96/1000] loss0.034-|Sample:13.62|
EPOCH[97/1000] loss0.034-|Sample:14.64|
EPOCH[98/1000] loss0.033-|Sample:14.26|
EPOCH[99/1000] loss0.033-|Sample:19.62|
EPOCH[100/1000] loss0.032-|Sample:15.59|
[TEST]
{'precision': array([0.00328439]), 'recall': array([0.00563267]), 'ndcg': array([0.00498571])}
EPOCH[101/1000] loss0.032-|Sample:15.01|
EPOCH[102/1000] loss0.031-|Sample:14.92|
EPOCH[103/1000] loss0.031-|Sample:15.20|
EPOCH[104/1000] loss0.030-|Sample:15.72|
EPOCH[105/1000] loss0.030-|Sample:15.04|
EPOCH[106/1000] loss0.030-|Sample:15.25|
EPOCH[107/1000] loss0.029-|Sample:15.29|
EPOCH[108/1000] loss0.029-|Sample:14.89|
EPOCH[109/1000] loss0.028-|Sample:15.36|
EPOCH[110/1000] loss0.028-|Sample:15.01|
[TEST]
{'precision': array([0.00357692]), 'recall': array([0.00644183]), 'ndcg': array([0.00551612])}
EPOCH[111/1000] loss0.028-|Sample:14.43|
EPOCH[112/1000] loss0.027-|Sample:15.39|
EPOCH[113/1000] loss0.027-|Sample:15.45|
EPOCH[114/1000] loss0.027-|Sample:14.86|
EPOCH[115/1000] loss0.026-|Sample:15.32|
EPOCH[116/1000] loss0.026-|Sample:14.73|
EPOCH[117/1000] loss0.026-|Sample:15.37|
EPOCH[118/1000] loss0.025-|Sample:14.50|
EPOCH[119/1000] loss0.025-|Sample:15.61|
EPOCH[120/1000] loss0.025-|Sample:14.45|
[TEST]
{'precision': array([0.003897]), 'recall': array([0.00728909]), 'ndcg': array([0.00612416])}
EPOCH[121/1000] loss0.025-|Sample:15.29|
EPOCH[122/1000] loss0.024-|Sample:14.79|
EPOCH[123/1000] loss0.025-|Sample:15.39|
EPOCH[124/1000] loss0.024-|Sample:14.81|
EPOCH[125/1000] loss0.024-|Sample:15.15|
EPOCH[126/1000] loss0.024-|Sample:15.82|
EPOCH[127/1000] loss0.023-|Sample:14.61|
EPOCH[128/1000] loss0.023-|Sample:15.46|
EPOCH[129/1000] loss0.023-|Sample:14.62|
EPOCH[130/1000] loss0.023-|Sample:15.23|
[TEST]
{'precision': array([0.00417624]), 'recall': array([0.00814016]), 'ndcg': array([0.00666418])}
EPOCH[131/1000] loss0.023-|Sample:15.14|
EPOCH[132/1000] loss0.022-|Sample:14.79|
EPOCH[133/1000] loss0.022-|Sample:14.14|
EPOCH[134/1000] loss0.022-|Sample:14.50|
EPOCH[135/1000] loss0.022-|Sample:13.73|
EPOCH[136/1000] loss0.022-|Sample:14.67|
EPOCH[137/1000] loss0.022-|Sample:13.68|
EPOCH[138/1000] loss0.021-|Sample:14.50|
EPOCH[139/1000] loss0.021-|Sample:14.39|
EPOCH[140/1000] loss0.021-|Sample:14.28|
[TEST]
{'precision': array([0.00457516]), 'recall': array([0.0091131]), 'ndcg': array([0.00747615])}
EPOCH[141/1000] loss0.021-|Sample:13.62|
EPOCH[142/1000] loss0.021-|Sample:14.53|
EPOCH[143/1000] loss0.021-|Sample:14.03|
EPOCH[144/1000] loss0.020-|Sample:14.48|
EPOCH[145/1000] loss0.020-|Sample:14.28|
EPOCH[146/1000] loss0.020-|Sample:14.00|
EPOCH[147/1000] loss0.020-|Sample:14.87|
EPOCH[148/1000] loss0.020-|Sample:14.14|
EPOCH[149/1000] loss0.020-|Sample:13.86|
EPOCH[150/1000] loss0.019-|Sample:14.56|
[TEST]
{'precision': array([0.00495223]), 'recall': array([0.01024547]), 'ndcg': array([0.00815396])}
EPOCH[151/1000] loss0.020-|Sample:14.42|
EPOCH[152/1000] loss0.019-|Sample:14.72|
EPOCH[153/1000] loss0.019-|Sample:14.31|
EPOCH[154/1000] loss0.019-|Sample:14.15|
EPOCH[155/1000] loss0.019-|Sample:13.93|
EPOCH[156/1000] loss0.019-|Sample:14.36|
EPOCH[157/1000] loss0.019-|Sample:13.76|
EPOCH[158/1000] loss0.018-|Sample:14.62|
EPOCH[159/1000] loss0.018-|Sample:14.39|
EPOCH[160/1000] loss0.018-|Sample:14.45|
[TEST]
{'precision': array([0.0052799]), 'recall': array([0.01115725]), 'ndcg': array([0.00879284])}
EPOCH[161/1000] loss0.018-|Sample:13.67|
EPOCH[162/1000] loss0.018-|Sample:14.65|
EPOCH[163/1000] loss0.018-|Sample:14.01|
EPOCH[164/1000] loss0.018-|Sample:14.45|
EPOCH[165/1000] loss0.018-|Sample:14.53|
EPOCH[166/1000] loss0.018-|Sample:14.00|
EPOCH[167/1000] loss0.018-|Sample:14.32|
EPOCH[168/1000] loss0.017-|Sample:13.67|
EPOCH[169/1000] loss0.017-|Sample:14.64|
EPOCH[170/1000] loss0.017-|Sample:14.23|
[TEST]
{'precision': array([0.00562088]), 'recall': array([0.01221127]), 'ndcg': array([0.00944782])}
EPOCH[171/1000] loss0.017-|Sample:14.62|
EPOCH[172/1000] loss0.017-|Sample:14.26|
EPOCH[173/1000] loss0.017-|Sample:14.17|
EPOCH[174/1000] loss0.017-|Sample:14.75|
EPOCH[175/1000] loss0.017-|Sample:13.84|
EPOCH[176/1000] loss0.016-|Sample:14.54|
EPOCH[177/1000] loss0.017-|Sample:13.81|
EPOCH[178/1000] loss0.016-|Sample:14.48|
EPOCH[179/1000] loss0.016-|Sample:14.34|
EPOCH[180/1000] loss0.016-|Sample:14.29|
[TEST]
{'precision': array([0.00594761]), 'recall': array([0.01307345]), 'ndcg': array([0.01025062])}
EPOCH[181/1000] loss0.016-|Sample:13.68|
EPOCH[182/1000] loss0.016-|Sample:14.65|
EPOCH[183/1000] loss0.016-|Sample:14.01|
EPOCH[184/1000] loss0.016-|Sample:14.75|
EPOCH[185/1000] loss0.016-|Sample:14.39|
EPOCH[186/1000] loss0.016-|Sample:14.34|
EPOCH[187/1000] loss0.016-|Sample:14.45|
EPOCH[188/1000] loss0.016-|Sample:13.67|
EPOCH[189/1000] loss0.016-|Sample:14.61|
EPOCH[190/1000] loss0.015-|Sample:13.65|
[TEST]
{'precision': array([0.00631138]), 'recall': array([0.01398754]), 'ndcg': array([0.01089123])}
EPOCH[191/1000] loss0.015-|Sample:14.57|
EPOCH[192/1000] loss0.015-|Sample:14.17|
EPOCH[193/1000] loss0.015-|Sample:14.25|
EPOCH[194/1000] loss0.015-|Sample:14.73|
EPOCH[195/1000] loss0.015-|Sample:13.81|
EPOCH[196/1000] loss0.015-|Sample:14.45|
EPOCH[197/1000] loss0.015-|Sample:14.09|
EPOCH[198/1000] loss0.015-|Sample:14.40|
EPOCH[199/1000] loss0.015-|Sample:14.23|
EPOCH[200/1000] loss0.015-|Sample:14.56|
[TEST]
{'precision': array([0.00656593]), 'recall': array([0.0147211]), 'ndcg': array([0.01143783])}
EPOCH[201/1000] loss0.015-|Sample:13.89|
EPOCH[202/1000] loss0.015-|Sample:14.65|
EPOCH[203/1000] loss0.014-|Sample:13.98|
EPOCH[204/1000] loss0.014-|Sample:14.53|
EPOCH[205/1000] loss0.015-|Sample:14.26|
EPOCH[206/1000] loss0.014-|Sample:14.54|
EPOCH[207/1000] loss0.014-|Sample:14.45|
EPOCH[208/1000] loss0.014-|Sample:14.06|
EPOCH[209/1000] loss0.014-|Sample:14.43|
EPOCH[210/1000] loss0.014-|Sample:13.86|
[TEST]
{'precision': array([0.0068917]), 'recall': array([0.01558904]), 'ndcg': array([0.01212422])}
EPOCH[211/1000] loss0.014-|Sample:14.37|
EPOCH[212/1000] loss0.014-|Sample:14.42|
EPOCH[213/1000] loss0.014-|Sample:14.65|
EPOCH[214/1000] loss0.014-|Sample:14.23|
EPOCH[215/1000] loss0.014-|Sample:14.04|
EPOCH[216/1000] loss0.014-|Sample:14.59|
EPOCH[217/1000] loss0.014-|Sample:13.79|
EPOCH[218/1000] loss0.014-|Sample:14.81|
EPOCH[219/1000] loss0.013-|Sample:14.07|
EPOCH[220/1000] loss0.013-|Sample:14.64|
[TEST]
{'precision': array([0.00716525]), 'recall': array([0.01629046]), 'ndcg': array([0.01270843])}
EPOCH[221/1000] loss0.013-|Sample:14.17|
EPOCH[222/1000] loss0.013-|Sample:14.28|
EPOCH[223/1000] loss0.013-|Sample:13.79|
EPOCH[224/1000] loss0.013-|Sample:14.73|
EPOCH[225/1000] loss0.013-|Sample:13.89|
EPOCH[226/1000] loss0.013-|Sample:14.57|
EPOCH[227/1000] loss0.013-|Sample:14.29|
EPOCH[228/1000] loss0.013-|Sample:14.34|
EPOCH[229/1000] loss0.013-|Sample:14.51|
EPOCH[230/1000] loss0.013-|Sample:13.95|
[TEST]
{'precision': array([0.00747203]), 'recall': array([0.01708772]), 'ndcg': array([0.01317197])}
EPOCH[231/1000] loss0.013-|Sample:14.00|
EPOCH[232/1000] loss0.013-|Sample:14.62|
EPOCH[233/1000] loss0.013-|Sample:14.90|
EPOCH[234/1000] loss0.013-|Sample:13.98|
EPOCH[235/1000] loss0.013-|Sample:14.62|
EPOCH[236/1000] loss0.013-|Sample:14.50|
EPOCH[237/1000] loss0.013-|Sample:13.82|
EPOCH[238/1000] loss0.013-|Sample:14.34|
EPOCH[239/1000] loss0.013-|Sample:13.86|
EPOCH[240/1000] loss0.012-|Sample:14.37|
[TEST]
{'precision': array([0.0078187]), 'recall': array([0.01788803]), 'ndcg': array([0.01383486])}
EPOCH[241/1000] loss0.012-|Sample:14.50|
EPOCH[242/1000] loss0.012-|Sample:14.51|
EPOCH[243/1000] loss0.012-|Sample:14.11|
EPOCH[244/1000] loss0.012-|Sample:14.56|
EPOCH[245/1000] loss0.012-|Sample:13.57|
EPOCH[246/1000] loss0.012-|Sample:14.42|
EPOCH[247/1000] loss0.012-|Sample:14.14|
EPOCH[248/1000] loss0.012-|Sample:14.59|
EPOCH[249/1000] loss0.012-|Sample:14.65|
EPOCH[250/1000] loss0.012-|Sample:14.29|
[TEST]
{'precision': array([0.00799157]), 'recall': array([0.01827664]), 'ndcg': array([0.01424446])}
EPOCH[251/1000] loss0.012-|Sample:13.81|
EPOCH[252/1000] loss0.012-|Sample:14.65|
EPOCH[253/1000] loss0.012-|Sample:14.53|
EPOCH[254/1000] loss0.012-|Sample:14.42|
EPOCH[255/1000] loss0.012-|Sample:14.61|
EPOCH[256/1000] loss0.012-|Sample:13.79|
EPOCH[257/1000] loss0.012-|Sample:14.65|
EPOCH[258/1000] loss0.012-|Sample:14.62|
EPOCH[259/1000] loss0.012-|Sample:13.75|
EPOCH[260/1000] loss0.012-|Sample:14.62|
[TEST]
{'precision': array([0.00823661]), 'recall': array([0.01880041]), 'ndcg': array([0.01460305])}
EPOCH[261/1000] loss0.012-|Sample:14.36|
EPOCH[262/1000] loss0.012-|Sample:14.47|
EPOCH[263/1000] loss0.012-|Sample:13.93|
EPOCH[264/1000] loss0.011-|Sample:14.51|
EPOCH[265/1000] loss0.011-|Sample:13.86|
EPOCH[266/1000] loss0.012-|Sample:14.64|
EPOCH[267/1000] loss0.011-|Sample:13.84|
EPOCH[268/1000] loss0.011-|Sample:14.67|
EPOCH[269/1000] loss0.011-|Sample:14.47|
EPOCH[270/1000] loss0.011-|Sample:14.23|
[TEST]
{'precision': array([0.00848451]), 'recall': array([0.01950767]), 'ndcg': array([0.01508186])}
EPOCH[271/1000] loss0.011-|Sample:13.68|
EPOCH[272/1000] loss0.011-|Sample:14.48|
EPOCH[273/1000] loss0.011-|Sample:13.98|
EPOCH[274/1000] loss0.011-|Sample:14.75|
EPOCH[275/1000] loss0.011-|Sample:14.64|
EPOCH[276/1000] loss0.011-|Sample:14.18|
EPOCH[277/1000] loss0.011-|Sample:14.53|
EPOCH[278/1000] loss0.011-|Sample:13.95|
EPOCH[279/1000] loss0.011-|Sample:14.62|
EPOCH[280/1000] loss0.011-|Sample:14.26|
[TEST]
{'precision': array([0.0085282]), 'recall': array([0.01976562]), 'ndcg': array([0.01516342])}
EPOCH[281/1000] loss0.011-|Sample:14.43|
EPOCH[282/1000] loss0.011-|Sample:14.39|
EPOCH[283/1000] loss0.011-|Sample:14.09|
EPOCH[284/1000] loss0.011-|Sample:14.51|
EPOCH[285/1000] loss0.011-|Sample:13.70|
EPOCH[286/1000] loss0.011-|Sample:14.47|
EPOCH[287/1000] loss0.011-|Sample:13.78|
EPOCH[288/1000] loss0.011-|Sample:14.42|
EPOCH[289/1000] loss0.011-|Sample:14.34|
EPOCH[290/1000] loss0.011-|Sample:14.25|
[TEST]
{'precision': array([0.00888817]), 'recall': array([0.02062747]), 'ndcg': array([0.01594591])}
EPOCH[291/1000] loss0.011-|Sample:13.76|
EPOCH[292/1000] loss0.011-|Sample:14.40|
EPOCH[293/1000] loss0.011-|Sample:14.06|
EPOCH[294/1000] loss0.011-|Sample:14.59|
EPOCH[295/1000] loss0.011-|Sample:14.57|
EPOCH[296/1000] loss0.011-|Sample:14.25|
EPOCH[297/1000] loss0.011-|Sample:14.70|
EPOCH[298/1000] loss0.011-|Sample:13.76|
EPOCH[299/1000] loss0.011-|Sample:14.57|
EPOCH[300/1000] loss0.010-|Sample:13.89|
[TEST]
{'precision': array([0.00896036]), 'recall': array([0.02097182]), 'ndcg': array([0.01617426])}
EPOCH[301/1000] loss0.011-|Sample:14.56|
EPOCH[302/1000] loss0.010-|Sample:14.28|
EPOCH[303/1000] loss0.011-|Sample:14.50|
EPOCH[304/1000] loss0.010-|Sample:14.40|
EPOCH[305/1000] loss0.010-|Sample:13.93|
EPOCH[306/1000] loss0.010-|Sample:14.48|
EPOCH[307/1000] loss0.010-|Sample:13.72|
EPOCH[308/1000] loss0.010-|Sample:14.79|
EPOCH[309/1000] loss0.010-|Sample:14.23|
EPOCH[310/1000] loss0.010-|Sample:14.81|
[TEST]
{'precision': array([0.00924054]), 'recall': array([0.02173726]), 'ndcg': array([0.01675876])}
EPOCH[311/1000] loss0.010-|Sample:13.84|
EPOCH[312/1000] loss0.010-|Sample:14.59|
EPOCH[313/1000] loss0.010-|Sample:13.73|
EPOCH[314/1000] loss0.010-|Sample:14.34|
EPOCH[315/1000] loss0.010-|Sample:14.14|
EPOCH[316/1000] loss0.010-|Sample:14.51|
EPOCH[317/1000] loss0.010-|Sample:14.47|
EPOCH[318/1000] loss0.010-|Sample:14.09|
EPOCH[319/1000] loss0.010-|Sample:14.64|
EPOCH[320/1000] loss0.010-|Sample:13.47|
[TEST]
{'precision': array([0.00941816]), 'recall': array([0.02213575]), 'ndcg': array([0.01720552])}
EPOCH[321/1000] loss0.010-|Sample:14.31|
EPOCH[322/1000] loss0.010-|Sample:14.12|
EPOCH[323/1000] loss0.010-|Sample:14.48|
EPOCH[324/1000] loss0.010-|Sample:14.47|
EPOCH[325/1000] loss0.010-|Sample:14.15|
EPOCH[326/1000] loss0.010-|Sample:14.54|
EPOCH[327/1000] loss0.010-|Sample:13.84|
EPOCH[328/1000] loss0.010-|Sample:14.54|
EPOCH[329/1000] loss0.010-|Sample:13.92|
EPOCH[330/1000] loss0.010-|Sample:14.28|
[TEST]
{'precision': array([0.00950839]), 'recall': array([0.0224212]), 'ndcg': array([0.0172032])}
EPOCH[331/1000] loss0.010-|Sample:14.39|
EPOCH[332/1000] loss0.010-|Sample:14.78|
EPOCH[333/1000] loss0.010-|Sample:14.36|
EPOCH[334/1000] loss0.010-|Sample:14.62|
EPOCH[335/1000] loss0.010-|Sample:18.27|
EPOCH[336/1000] loss0.010-|Sample:14.92|
EPOCH[337/1000] loss0.010-|Sample:15.18|
EPOCH[338/1000] loss0.010-|Sample:15.18|
EPOCH[339/1000] loss0.010-|Sample:14.97|
EPOCH[340/1000] loss0.010-|Sample:15.07|
[TEST]
{'precision': array([0.00962711]), 'recall': array([0.02274123]), 'ndcg': array([0.0174768])}
EPOCH[341/1000] loss0.010-|Sample:15.06|
EPOCH[342/1000] loss0.010-|Sample:14.73|
EPOCH[343/1000] loss0.010-|Sample:14.98|
EPOCH[344/1000] loss0.010-|Sample:15.12|
EPOCH[345/1000] loss0.010-|Sample:14.76|
EPOCH[346/1000] loss0.010-|Sample:14.86|
EPOCH[347/1000] loss0.010-|Sample:15.07|
EPOCH[348/1000] loss0.010-|Sample:14.76|
EPOCH[349/1000] loss0.010-|Sample:15.15|
EPOCH[350/1000] loss0.010-|Sample:15.23|
[TEST]
{'precision': array([0.00978288]), 'recall': array([0.02326801]), 'ndcg': array([0.01790505])}
EPOCH[351/1000] loss0.010-|Sample:14.78|
EPOCH[352/1000] loss0.010-|Sample:14.97|
EPOCH[353/1000] loss0.010-|Sample:15.39|
EPOCH[354/1000] loss0.009-|Sample:15.07|
EPOCH[355/1000] loss0.010-|Sample:14.93|
EPOCH[356/1000] loss0.009-|Sample:15.00|
EPOCH[357/1000] loss0.009-|Sample:16.50|
EPOCH[358/1000] loss0.009-|Sample:15.04|
EPOCH[359/1000] loss0.009-|Sample:15.00|
EPOCH[360/1000] loss0.010-|Sample:16.01|
[TEST]
{'precision': array([0.01010676]), 'recall': array([0.02389617]), 'ndcg': array([0.01836159])}
EPOCH[361/1000] loss0.010-|Sample:16.21|
EPOCH[362/1000] loss0.009-|Sample:16.64|
EPOCH[363/1000] loss0.009-|Sample:16.15|
EPOCH[364/1000] loss0.009-|Sample:18.34|
EPOCH[365/1000] loss0.009-|Sample:16.71|
EPOCH[366/1000] loss0.009-|Sample:17.40|
EPOCH[367/1000] loss0.009-|Sample:16.36|
EPOCH[368/1000] loss0.009-|Sample:16.48|
EPOCH[369/1000] loss0.009-|Sample:16.37|
EPOCH[370/1000] loss0.009-|Sample:16.90|
[TEST]
{'precision': array([0.01011056]), 'recall': array([0.02396272]), 'ndcg': array([0.01839918])}
EPOCH[371/1000] loss0.009-|Sample:17.11|
EPOCH[372/1000] loss0.009-|Sample:17.67|
EPOCH[373/1000] loss0.009-|Sample:17.21|
EPOCH[374/1000] loss0.009-|Sample:17.15|
EPOCH[375/1000] loss0.009-|Sample:17.84|
EPOCH[376/1000] loss0.009-|Sample:17.25|
EPOCH[377/1000] loss0.009-|Sample:16.12|
EPOCH[378/1000] loss0.009-|Sample:18.46|
EPOCH[379/1000] loss0.009-|Sample:16.28|
EPOCH[380/1000] loss0.009-|Sample:16.06|
[TEST]
{'precision': array([0.01027202]), 'recall': array([0.02440298]), 'ndcg': array([0.01877111])}
EPOCH[381/1000] loss0.009-|Sample:17.34|
EPOCH[382/1000] loss0.009-|Sample:16.96|
EPOCH[383/1000] loss0.009-|Sample:17.32|
EPOCH[384/1000] loss0.009-|Sample:17.21|
EPOCH[385/1000] loss0.009-|Sample:17.61|
EPOCH[386/1000] loss0.009-|Sample:16.68|
EPOCH[387/1000] loss0.009-|Sample:18.45|
EPOCH[388/1000] loss0.009-|Sample:16.45|
EPOCH[389/1000] loss0.009-|Sample:16.71|
EPOCH[390/1000] loss0.009-|Sample:17.15|
[TEST]
{'precision': array([0.01042874]), 'recall': array([0.02485027]), 'ndcg': array([0.01906559])}
EPOCH[391/1000] loss0.009-|Sample:18.51|
EPOCH[392/1000] loss0.009-|Sample:17.50|
EPOCH[393/1000] loss0.009-|Sample:18.12|
EPOCH[394/1000] loss0.009-|Sample:17.31|
EPOCH[395/1000] loss0.009-|Sample:17.92|
EPOCH[396/1000] loss0.009-|Sample:16.15|
EPOCH[397/1000] loss0.009-|Sample:16.95|
EPOCH[398/1000] loss0.009-|Sample:16.11|
EPOCH[399/1000] loss0.009-|Sample:16.39|
EPOCH[400/1000] loss0.009-|Sample:18.51|
[TEST]
{'precision': array([0.01050947]), 'recall': array([0.0251729]), 'ndcg': array([0.01936529])}
EPOCH[401/1000] loss0.009-|Sample:17.54|
EPOCH[402/1000] loss0.009-|Sample:16.42|
EPOCH[403/1000] loss0.009-|Sample:17.21|
EPOCH[404/1000] loss0.009-|Sample:16.09|
EPOCH[405/1000] loss0.009-|Sample:18.32|
EPOCH[406/1000] loss0.009-|Sample:17.62|
EPOCH[407/1000] loss0.009-|Sample:17.82|
EPOCH[408/1000] loss0.009-|Sample:17.11|
EPOCH[409/1000] loss0.009-|Sample:17.48|
EPOCH[410/1000] loss0.009-|Sample:17.86|
[TEST]
{'precision': array([0.01073267]), 'recall': array([0.02558851]), 'ndcg': array([0.01959018])}
EPOCH[411/1000] loss0.009-|Sample:16.11|
EPOCH[412/1000] loss0.009-|Sample:16.36|
EPOCH[413/1000] loss0.009-|Sample:16.20|
EPOCH[414/1000] loss0.009-|Sample:16.87|
EPOCH[415/1000] loss0.009-|Sample:18.43|
EPOCH[416/1000] loss0.009-|Sample:16.73|
EPOCH[417/1000] loss0.009-|Sample:17.25|
EPOCH[418/1000] loss0.009-|Sample:16.43|
EPOCH[419/1000] loss0.009-|Sample:17.48|
EPOCH[420/1000] loss0.009-|Sample:16.34|
[TEST]
{'precision': array([0.01074597]), 'recall': array([0.02566287]), 'ndcg': array([0.01966185])}
EPOCH[421/1000] loss0.009-|Sample:18.09|
EPOCH[422/1000] loss0.009-|Sample:17.18|
EPOCH[423/1000] loss0.009-|Sample:17.31|
EPOCH[424/1000] loss0.009-|Sample:17.56|
EPOCH[425/1000] loss0.009-|Sample:16.95|
EPOCH[426/1000] loss0.009-|Sample:16.54|
EPOCH[427/1000] loss0.009-|Sample:18.01|
EPOCH[428/1000] loss0.009-|Sample:16.20|
EPOCH[429/1000] loss0.009-|Sample:17.48|
EPOCH[430/1000] loss0.009-|Sample:17.01|
[TEST]
{'precision': array([0.01097392]), 'recall': array([0.02628727]), 'ndcg': array([0.02014178])}
EPOCH[431/1000] loss0.009-|Sample:16.21|
EPOCH[432/1000] loss0.009-|Sample:16.43|
EPOCH[433/1000] loss0.009-|Sample:17.65|
EPOCH[434/1000] loss0.009-|Sample:16.54|
EPOCH[435/1000] loss0.009-|Sample:18.11|
EPOCH[436/1000] loss0.009-|Sample:16.87|
EPOCH[437/1000] loss0.009-|Sample:16.23|
EPOCH[438/1000] loss0.009-|Sample:16.12|
EPOCH[439/1000] loss0.009-|Sample:17.01|
EPOCH[440/1000] loss0.009-|Sample:16.11|
[TEST]
{'precision': array([0.01106605]), 'recall': array([0.02659372]), 'ndcg': array([0.02028327])}
EPOCH[441/1000] loss0.009-|Sample:18.04|
EPOCH[442/1000] loss0.009-|Sample:17.26|
EPOCH[443/1000] loss0.009-|Sample:17.01|
EPOCH[444/1000] loss0.009-|Sample:17.43|
EPOCH[445/1000] loss0.008-|Sample:16.81|
EPOCH[446/1000] loss0.009-|Sample:16.57|
EPOCH[447/1000] loss0.009-|Sample:16.37|
EPOCH[448/1000] loss0.009-|Sample:17.96|
EPOCH[449/1000] loss0.009-|Sample:16.67|
EPOCH[450/1000] loss0.009-|Sample:17.70|
[TEST]
{'precision': array([0.01108694]), 'recall': array([0.02688297]), 'ndcg': array([0.02052982])}
EPOCH[451/1000] loss0.008-|Sample:16.51|
EPOCH[452/1000] loss0.008-|Sample:17.42|
EPOCH[453/1000] loss0.009-|Sample:17.01|
EPOCH[454/1000] loss0.008-|Sample:16.56|
EPOCH[455/1000] loss0.009-|Sample:16.64|
EPOCH[456/1000] loss0.008-|Sample:17.29|
EPOCH[457/1000] loss0.009-|Sample:18.14|
EPOCH[458/1000] loss0.008-|Sample:17.65|
EPOCH[459/1000] loss0.009-|Sample:18.50|
EPOCH[460/1000] loss0.009-|Sample:17.90|
[TEST]
{'precision': array([0.01117148]), 'recall': array([0.02702392]), 'ndcg': array([0.02076581])}
EPOCH[461/1000] loss0.008-|Sample:16.14|
EPOCH[462/1000] loss0.008-|Sample:16.34|
EPOCH[463/1000] loss0.008-|Sample:16.04|
EPOCH[464/1000] loss0.008-|Sample:16.39|
EPOCH[465/1000] loss0.008-|Sample:17.17|
EPOCH[466/1000] loss0.009-|Sample:17.36|
EPOCH[467/1000] loss0.008-|Sample:17.48|
EPOCH[468/1000] loss0.008-|Sample:16.54|
EPOCH[469/1000] loss0.008-|Sample:17.84|
EPOCH[470/1000] loss0.008-|Sample:16.03|
[TEST]
{'precision': array([0.01131584]), 'recall': array([0.02727659]), 'ndcg': array([0.02073325])}
EPOCH[471/1000] loss0.008-|Sample:18.26|
EPOCH[472/1000] loss0.008-|Sample:17.01|
EPOCH[473/1000] loss0.008-|Sample:18.37|
EPOCH[474/1000] loss0.008-|Sample:18.09|
EPOCH[475/1000] loss0.008-|Sample:17.31|
EPOCH[476/1000] loss0.008-|Sample:17.28|
EPOCH[477/1000] loss0.008-|Sample:18.53|
EPOCH[478/1000] loss0.008-|Sample:16.45|
EPOCH[479/1000] loss0.008-|Sample:16.32|
EPOCH[480/1000] loss0.008-|Sample:17.43|
[TEST]
{'precision': array([0.01136428]), 'recall': array([0.02747252]), 'ndcg': array([0.02099153])}
EPOCH[481/1000] loss0.008-|Sample:17.14|
EPOCH[482/1000] loss0.008-|Sample:17.46|
EPOCH[483/1000] loss0.008-|Sample:16.73|
EPOCH[484/1000] loss0.008-|Sample:16.50|
EPOCH[485/1000] loss0.008-|Sample:17.56|
EPOCH[486/1000] loss0.008-|Sample:17.18|
EPOCH[487/1000] loss0.008-|Sample:16.29|
EPOCH[488/1000] loss0.008-|Sample:16.51|
EPOCH[489/1000] loss0.008-|Sample:18.06|
EPOCH[490/1000] loss0.008-|Sample:16.81|
[TEST]
{'precision': array([0.01149726]), 'recall': array([0.02785714]), 'ndcg': array([0.02127764])}
EPOCH[491/1000] loss0.008-|Sample:16.31|
EPOCH[492/1000] loss0.008-|Sample:17.15|
EPOCH[493/1000] loss0.008-|Sample:16.46|
EPOCH[494/1000] loss0.008-|Sample:16.98|
EPOCH[495/1000] loss0.008-|Sample:17.50|
EPOCH[496/1000] loss0.008-|Sample:17.11|
EPOCH[497/1000] loss0.008-|Sample:17.43|
EPOCH[498/1000] loss0.008-|Sample:16.50|
EPOCH[499/1000] loss0.008-|Sample:16.26|
EPOCH[500/1000] loss0.008-|Sample:16.29|
[TEST]
{'precision': array([0.01161408]), 'recall': array([0.02828951]), 'ndcg': array([0.02141565])}
EPOCH[501/1000] loss0.008-|Sample:18.14|
EPOCH[502/1000] loss0.008-|Sample:17.76|
EPOCH[503/1000] loss0.008-|Sample:18.43|
EPOCH[504/1000] loss0.008-|Sample:17.37|
EPOCH[505/1000] loss0.008-|Sample:18.59|
EPOCH[506/1000] loss0.008-|Sample:17.00|
EPOCH[507/1000] loss0.008-|Sample:17.56|
EPOCH[508/1000] loss0.008-|Sample:16.71|
EPOCH[509/1000] loss0.008-|Sample:17.12|
EPOCH[510/1000] loss0.008-|Sample:16.21|
[TEST]
{'precision': array([0.01155709]), 'recall': array([0.02810733]), 'ndcg': array([0.02131469])}
EPOCH[511/1000] loss0.008-|Sample:15.64|
EPOCH[512/1000] loss0.008-|Sample:15.08|
EPOCH[513/1000] loss0.008-|Sample:15.14|
EPOCH[514/1000] loss0.008-|Sample:14.90|
EPOCH[515/1000] loss0.008-|Sample:15.14|
EPOCH[516/1000] loss0.008-|Sample:15.92|
EPOCH[517/1000] loss0.008-|Sample:14.92|
EPOCH[518/1000] loss0.008-|Sample:14.91|
EPOCH[519/1000] loss0.008-|Sample:16.71|
EPOCH[520/1000] loss0.008-|Sample:16.89|
[TEST]
{'precision': array([0.01174325]), 'recall': array([0.02828109]), 'ndcg': array([0.0215288])}
EPOCH[521/1000] loss0.008-|Sample:17.67|
EPOCH[522/1000] loss0.008-|Sample:17.32|
EPOCH[523/1000] loss0.008-|Sample:17.42|
EPOCH[524/1000] loss0.008-|Sample:17.32|
EPOCH[525/1000] loss0.008-|Sample:17.45|
EPOCH[526/1000] loss0.008-|Sample:16.95|
EPOCH[527/1000] loss0.008-|Sample:17.29|
EPOCH[528/1000] loss0.008-|Sample:16.68|
EPOCH[529/1000] loss0.008-|Sample:16.59|
EPOCH[530/1000] loss0.008-|Sample:17.32|
[TEST]
{'precision': array([0.0117689]), 'recall': array([0.02850973]), 'ndcg': array([0.02166375])}
EPOCH[531/1000] loss0.008-|Sample:16.98|
EPOCH[532/1000] loss0.008-|Sample:16.70|
EPOCH[533/1000] loss0.008-|Sample:17.39|
EPOCH[534/1000] loss0.008-|Sample:16.61|
EPOCH[535/1000] loss0.008-|Sample:16.71|
EPOCH[536/1000] loss0.008-|Sample:17.76|
EPOCH[537/1000] loss0.008-|Sample:16.18|
EPOCH[538/1000] loss0.008-|Sample:16.92|
EPOCH[539/1000] loss0.008-|Sample:17.50|
EPOCH[540/1000] loss0.008-|Sample:16.68|
[TEST]
{'precision': array([0.01180309]), 'recall': array([0.02872701]), 'ndcg': array([0.02189525])}
EPOCH[541/1000] loss0.008-|Sample:17.28|
EPOCH[542/1000] loss0.008-|Sample:17.17|
EPOCH[543/1000] loss0.008-|Sample:17.23|
EPOCH[544/1000] loss0.008-|Sample:17.59|
EPOCH[545/1000] loss0.008-|Sample:17.98|
EPOCH[546/1000] loss0.008-|Sample:16.86|
EPOCH[547/1000] loss0.008-|Sample:16.53|
EPOCH[548/1000] loss0.008-|Sample:17.46|
EPOCH[549/1000] loss0.008-|Sample:17.78|
EPOCH[550/1000] loss0.008-|Sample:16.53|
[TEST]
{'precision': array([0.01184013]), 'recall': array([0.02867983]), 'ndcg': array([0.02181456])}
EPOCH[551/1000] loss0.008-|Sample:16.51|
EPOCH[552/1000] loss0.008-|Sample:16.57|
EPOCH[553/1000] loss0.008-|Sample:18.36|
EPOCH[554/1000] loss0.008-|Sample:17.65|
EPOCH[555/1000] loss0.008-|Sample:17.37|
EPOCH[556/1000] loss0.008-|Sample:16.84|
EPOCH[557/1000] loss0.008-|Sample:17.82|
EPOCH[558/1000] loss0.008-|Sample:17.32|
EPOCH[559/1000] loss0.008-|Sample:17.20|
EPOCH[560/1000] loss0.008-|Sample:16.20|
[TEST]
{'precision': array([0.01197215]), 'recall': array([0.02903356]), 'ndcg': array([0.022093])}
EPOCH[561/1000] loss0.008-|Sample:16.67|
EPOCH[562/1000] loss0.008-|Sample:16.56|
EPOCH[563/1000] loss0.008-|Sample:18.26|
EPOCH[564/1000] loss0.008-|Sample:16.21|
EPOCH[565/1000] loss0.008-|Sample:17.23|
EPOCH[566/1000] loss0.008-|Sample:17.96|
EPOCH[567/1000] loss0.008-|Sample:16.03|
EPOCH[568/1000] loss0.008-|Sample:16.25|
EPOCH[569/1000] loss0.008-|Sample:18.17|
EPOCH[570/1000] loss0.008-|Sample:17.18|
[TEST]
{'precision': array([0.01198925]), 'recall': array([0.02896291]), 'ndcg': array([0.02217388])}
EPOCH[571/1000] loss0.008-|Sample:16.48|
EPOCH[572/1000] loss0.008-|Sample:18.20|
EPOCH[573/1000] loss0.008-|Sample:16.62|
EPOCH[574/1000] loss0.008-|Sample:17.70|
EPOCH[575/1000] loss0.008-|Sample:17.54|
EPOCH[576/1000] loss0.008-|Sample:17.29|
EPOCH[577/1000] loss0.008-|Sample:16.21|
EPOCH[578/1000] loss0.008-|Sample:18.39|
EPOCH[579/1000] loss0.008-|Sample:16.36|
EPOCH[580/1000] loss0.008-|Sample:16.14|
[TEST]
{'precision': array([0.01211937]), 'recall': array([0.02944114]), 'ndcg': array([0.0221995])}
EPOCH[581/1000] loss0.008-|Sample:17.34|
EPOCH[582/1000] loss0.008-|Sample:17.62|
EPOCH[583/1000] loss0.008-|Sample:17.57|
EPOCH[584/1000] loss0.008-|Sample:17.81|
EPOCH[585/1000] loss0.008-|Sample:16.89|
EPOCH[586/1000] loss0.008-|Sample:18.04|
EPOCH[587/1000] loss0.008-|Sample:16.98|
EPOCH[588/1000] loss0.008-|Sample:18.11|
EPOCH[589/1000] loss0.008-|Sample:16.87|
EPOCH[590/1000] loss0.008-|Sample:16.32|
[TEST]
{'precision': array([0.0121944]), 'recall': array([0.02959777]), 'ndcg': array([0.02242779])}
EPOCH[591/1000] loss0.008-|Sample:17.75|
EPOCH[592/1000] loss0.008-|Sample:16.68|
EPOCH[593/1000] loss0.008-|Sample:16.64|
EPOCH[594/1000] loss0.008-|Sample:17.51|
EPOCH[595/1000] loss0.008-|Sample:17.04|
EPOCH[596/1000] loss0.008-|Sample:17.78|
EPOCH[597/1000] loss0.008-|Sample:16.87|
EPOCH[598/1000] loss0.008-|Sample:17.82|
EPOCH[599/1000] loss0.008-|Sample:17.06|
EPOCH[600/1000] loss0.008-|Sample:18.23|
[TEST]
{'precision': array([0.01215926]), 'recall': array([0.02947581]), 'ndcg': array([0.02238711])}
EPOCH[601/1000] loss0.008-|Sample:17.37|
EPOCH[602/1000] loss0.008-|Sample:17.65|
EPOCH[603/1000] loss0.008-|Sample:18.60|
EPOCH[604/1000] loss0.008-|Sample:17.03|
EPOCH[605/1000] loss0.008-|Sample:17.43|
EPOCH[606/1000] loss0.008-|Sample:16.00|
EPOCH[607/1000] loss0.008-|Sample:16.39|
EPOCH[608/1000] loss0.008-|Sample:17.73|
EPOCH[609/1000] loss0.008-|Sample:17.04|
EPOCH[610/1000] loss0.008-|Sample:18.53|
[TEST]
{'precision': array([0.01225424]), 'recall': array([0.02969379]), 'ndcg': array([0.02259284])}
EPOCH[611/1000] loss0.008-|Sample:17.06|
EPOCH[612/1000] loss0.008-|Sample:17.23|
EPOCH[613/1000] loss0.008-|Sample:17.11|
EPOCH[614/1000] loss0.008-|Sample:17.21|
EPOCH[615/1000] loss0.008-|Sample:17.32|
EPOCH[616/1000] loss0.008-|Sample:18.43|
EPOCH[617/1000] loss0.008-|Sample:17.39|
EPOCH[618/1000] loss0.008-|Sample:18.64|
EPOCH[619/1000] loss0.008-|Sample:17.23|
EPOCH[620/1000] loss0.008-|Sample:17.26|
[TEST]
{'precision': array([0.01218871]), 'recall': array([0.02961751]), 'ndcg': array([0.02259264])}
EPOCH[621/1000] loss0.008-|Sample:16.14|
EPOCH[622/1000] loss0.008-|Sample:16.40|
EPOCH[623/1000] loss0.008-|Sample:17.17|
EPOCH[624/1000] loss0.008-|Sample:16.87|
EPOCH[625/1000] loss0.008-|Sample:16.23|
EPOCH[626/1000] loss0.008-|Sample:19.53|
EPOCH[627/1000] loss0.008-|Sample:17.26|
EPOCH[628/1000] loss0.008-|Sample:18.12|
EPOCH[629/1000] loss0.008-|Sample:18.28|
EPOCH[630/1000] loss0.008-|Sample:16.70|
[TEST]
{'precision': array([0.01225994]), 'recall': array([0.02982049]), 'ndcg': array([0.02263765])}
EPOCH[631/1000] loss0.008-|Sample:17.64|
EPOCH[632/1000] loss0.008-|Sample:16.61|
EPOCH[633/1000] loss0.008-|Sample:16.46|
EPOCH[634/1000] loss0.008-|Sample:16.82|
EPOCH[635/1000] loss0.008-|Sample:16.89|
EPOCH[636/1000] loss0.008-|Sample:18.18|
EPOCH[637/1000] loss0.008-|Sample:16.09|
EPOCH[638/1000] loss0.008-|Sample:16.21|
EPOCH[639/1000] loss0.008-|Sample:16.86|
EPOCH[640/1000] loss0.008-|Sample:16.36|
[TEST]
{'precision': array([0.01242235]), 'recall': array([0.03039818]), 'ndcg': array([0.02290998])}
EPOCH[641/1000] loss0.008-|Sample:16.78|
EPOCH[642/1000] loss0.008-|Sample:16.67|
EPOCH[643/1000] loss0.008-|Sample:18.07|
EPOCH[644/1000] loss0.008-|Sample:17.06|
EPOCH[645/1000] loss0.008-|Sample:16.89|
EPOCH[646/1000] loss0.008-|Sample:17.21|
EPOCH[647/1000] loss0.008-|Sample:17.50|
EPOCH[648/1000] loss0.008-|Sample:16.73|
EPOCH[649/1000] loss0.008-|Sample:17.81|
EPOCH[650/1000] loss0.008-|Sample:17.20|
[TEST]
{'precision': array([0.01238816]), 'recall': array([0.0301527]), 'ndcg': array([0.02286942])}
EPOCH[651/1000] loss0.008-|Sample:17.31|
EPOCH[652/1000] loss0.008-|Sample:17.43|
EPOCH[653/1000] loss0.008-|Sample:17.59|
EPOCH[654/1000] loss0.008-|Sample:18.59|
EPOCH[655/1000] loss0.008-|Sample:17.17|
EPOCH[656/1000] loss0.008-|Sample:17.21|
EPOCH[657/1000] loss0.008-|Sample:18.76|
EPOCH[658/1000] loss0.008-|Sample:17.26|
EPOCH[659/1000] loss0.008-|Sample:18.09|
EPOCH[660/1000] loss0.008-|Sample:16.32|
[TEST]
{'precision': array([0.01254773]), 'recall': array([0.03040643]), 'ndcg': array([0.02303562])}
EPOCH[661/1000] loss0.008-|Sample:17.42|
EPOCH[662/1000] loss0.008-|Sample:17.18|
EPOCH[663/1000] loss0.008-|Sample:18.04|
EPOCH[664/1000] loss0.008-|Sample:17.00|
EPOCH[665/1000] loss0.008-|Sample:18.09|
EPOCH[666/1000] loss0.008-|Sample:16.93|
EPOCH[667/1000] loss0.008-|Sample:18.34|
EPOCH[668/1000] loss0.008-|Sample:16.90|
EPOCH[669/1000] loss0.008-|Sample:17.59|
EPOCH[670/1000] loss0.008-|Sample:16.68|
[TEST]
{'precision': array([0.01255438]), 'recall': array([0.03060289]), 'ndcg': array([0.02309051])}
EPOCH[671/1000] loss0.008-|Sample:17.89|
EPOCH[672/1000] loss0.008-|Sample:17.56|
EPOCH[673/1000] loss0.008-|Sample:17.31|
EPOCH[674/1000] loss0.008-|Sample:17.31|
EPOCH[675/1000] loss0.008-|Sample:18.42|
EPOCH[676/1000] loss0.008-|Sample:17.11|
EPOCH[677/1000] loss0.008-|Sample:17.04|
EPOCH[678/1000] loss0.008-|Sample:16.95|
EPOCH[679/1000] loss0.008-|Sample:16.93|
EPOCH[680/1000] loss0.008-|Sample:16.68|
[TEST]
{'precision': array([0.01251733]), 'recall': array([0.03045644]), 'ndcg': array([0.02310145])}
EPOCH[681/1000] loss0.008-|Sample:17.93|
EPOCH[682/1000] loss0.008-|Sample:18.09|
EPOCH[683/1000] loss0.008-|Sample:17.50|
EPOCH[684/1000] loss0.008-|Sample:17.70|
EPOCH[685/1000] loss0.008-|Sample:17.25|
EPOCH[686/1000] loss0.008-|Sample:19.23|
EPOCH[687/1000] loss0.008-|Sample:16.07|
EPOCH[688/1000] loss0.008-|Sample:16.36|
EPOCH[689/1000] loss0.008-|Sample:16.87|
EPOCH[690/1000] loss0.008-|Sample:16.21|
[TEST]
{'precision': array([0.0126921]), 'recall': array([0.0309615]), 'ndcg': array([0.0234306])}
EPOCH[691/1000] loss0.008-|Sample:17.45|
EPOCH[692/1000] loss0.008-|Sample:18.17|
EPOCH[693/1000] loss0.008-|Sample:17.64|
EPOCH[694/1000] loss0.008-|Sample:18.59|
EPOCH[695/1000] loss0.008-|Sample:17.71|
EPOCH[696/1000] loss0.008-|Sample:17.87|
EPOCH[697/1000] loss0.008-|Sample:18.20|
EPOCH[698/1000] loss0.008-|Sample:17.01|
EPOCH[699/1000] loss0.008-|Sample:18.56|
EPOCH[700/1000] loss0.008-|Sample:16.32|
[TEST]
{'precision': array([0.01285261]), 'recall': array([0.03135187]), 'ndcg': array([0.02372852])}
EPOCH[701/1000] loss0.008-|Sample:17.84|
EPOCH[702/1000] loss0.008-|Sample:17.12|
EPOCH[703/1000] loss0.008-|Sample:17.98|
EPOCH[704/1000] loss0.007-|Sample:18.07|
EPOCH[705/1000] loss0.008-|Sample:17.04|
EPOCH[706/1000] loss0.008-|Sample:16.95|
EPOCH[707/1000] loss0.008-|Sample:16.73|
EPOCH[708/1000] loss0.008-|Sample:16.64|
EPOCH[709/1000] loss0.008-|Sample:16.23|
EPOCH[710/1000] loss0.007-|Sample:16.32|
[TEST]
{'precision': array([0.01267975]), 'recall': array([0.03092137]), 'ndcg': array([0.0233712])}
EPOCH[711/1000] loss0.008-|Sample:16.84|
EPOCH[712/1000] loss0.008-|Sample:16.84|
EPOCH[713/1000] loss0.008-|Sample:16.54|
EPOCH[714/1000] loss0.007-|Sample:16.71|
EPOCH[715/1000] loss0.008-|Sample:16.98|
EPOCH[716/1000] loss0.007-|Sample:17.07|
EPOCH[717/1000] loss0.008-|Sample:17.76|
EPOCH[718/1000] loss0.008-|Sample:16.75|
EPOCH[719/1000] loss0.008-|Sample:16.81|
EPOCH[720/1000] loss0.008-|Sample:17.90|
[TEST]
{'precision': array([0.01273009]), 'recall': array([0.03090582]), 'ndcg': array([0.02343039])}
EPOCH[721/1000] loss0.007-|Sample:16.43|
EPOCH[722/1000] loss0.008-|Sample:16.96|
EPOCH[723/1000] loss0.008-|Sample:17.57|
EPOCH[724/1000] loss0.007-|Sample:16.68|
EPOCH[725/1000] loss0.008-|Sample:17.82|
EPOCH[726/1000] loss0.008-|Sample:16.25|
EPOCH[727/1000] loss0.008-|Sample:17.15|
EPOCH[728/1000] loss0.008-|Sample:16.57|
EPOCH[729/1000] loss0.008-|Sample:16.14|
EPOCH[730/1000] loss0.007-|Sample:15.89|
[TEST]
{'precision': array([0.01260851]), 'recall': array([0.03083065]), 'ndcg': array([0.02349002])}
EPOCH[731/1000] loss0.008-|Sample:18.46|
EPOCH[732/1000] loss0.008-|Sample:17.14|
EPOCH[733/1000] loss0.008-|Sample:18.25|
EPOCH[734/1000] loss0.008-|Sample:17.15|
EPOCH[735/1000] loss0.008-|Sample:17.93|
EPOCH[736/1000] loss0.008-|Sample:17.18|
EPOCH[737/1000] loss0.008-|Sample:18.32|
EPOCH[738/1000] loss0.007-|Sample:16.21|
EPOCH[739/1000] loss0.008-|Sample:16.32|
EPOCH[740/1000] loss0.007-|Sample:18.12|
[TEST]
{'precision': array([0.01276903]), 'recall': array([0.03138441]), 'ndcg': array([0.02377667])}
EPOCH[741/1000] loss0.007-|Sample:16.07|
EPOCH[742/1000] loss0.007-|Sample:17.45|
EPOCH[743/1000] loss0.008-|Sample:16.40|
EPOCH[744/1000] loss0.008-|Sample:16.51|
EPOCH[745/1000] loss0.007-|Sample:17.18|
EPOCH[746/1000] loss0.007-|Sample:16.39|
EPOCH[747/1000] loss0.008-|Sample:17.26|
EPOCH[748/1000] loss0.008-|Sample:18.11|
EPOCH[749/1000] loss0.008-|Sample:17.59|
EPOCH[750/1000] loss0.007-|Sample:17.39|
[TEST]
{'precision': array([0.01279182]), 'recall': array([0.03129309]), 'ndcg': array([0.0238233])}
EPOCH[751/1000] loss0.007-|Sample:16.51|
EPOCH[752/1000] loss0.007-|Sample:16.34|
EPOCH[753/1000] loss0.007-|Sample:18.12|
EPOCH[754/1000] loss0.007-|Sample:16.96|
EPOCH[755/1000] loss0.007-|Sample:18.54|
EPOCH[756/1000] loss0.007-|Sample:16.50|
EPOCH[757/1000] loss0.008-|Sample:17.12|
EPOCH[758/1000] loss0.007-|Sample:17.71|
EPOCH[759/1000] loss0.008-|Sample:16.14|
EPOCH[760/1000] loss0.007-|Sample:16.76|
[TEST]
{'precision': array([0.01286211]), 'recall': array([0.03142404]), 'ndcg': array([0.02384394])}
EPOCH[761/1000] loss0.007-|Sample:17.45|
EPOCH[762/1000] loss0.007-|Sample:16.39|
EPOCH[763/1000] loss0.007-|Sample:16.92|
EPOCH[764/1000] loss0.008-|Sample:17.36|
EPOCH[765/1000] loss0.007-|Sample:16.31|
EPOCH[766/1000] loss0.008-|Sample:17.21|
EPOCH[767/1000] loss0.007-|Sample:16.18|
EPOCH[768/1000] loss0.007-|Sample:17.89|
EPOCH[769/1000] loss0.007-|Sample:16.36|
EPOCH[770/1000] loss0.007-|Sample:16.82|
[TEST]
{'precision': array([0.01290105]), 'recall': array([0.0315681]), 'ndcg': array([0.02395589])}
EPOCH[771/1000] loss0.007-|Sample:17.29|
EPOCH[772/1000] loss0.007-|Sample:16.93|
EPOCH[773/1000] loss0.008-|Sample:18.17|
EPOCH[774/1000] loss0.007-|Sample:16.95|
EPOCH[775/1000] loss0.008-|Sample:16.73|
EPOCH[776/1000] loss0.008-|Sample:17.43|
EPOCH[777/1000] loss0.007-|Sample:17.07|
EPOCH[778/1000] loss0.008-|Sample:17.48|
EPOCH[779/1000] loss0.007-|Sample:17.23|
EPOCH[780/1000] loss0.007-|Sample:17.11|
[TEST]
{'precision': array([0.01291435]), 'recall': array([0.03154043]), 'ndcg': array([0.02398942])}
EPOCH[781/1000] loss0.007-|Sample:17.93|
EPOCH[782/1000] loss0.007-|Sample:16.65|
EPOCH[783/1000] loss0.008-|Sample:17.15|
EPOCH[784/1000] loss0.007-|Sample:17.46|
EPOCH[785/1000] loss0.007-|Sample:16.39|
EPOCH[786/1000] loss0.007-|Sample:17.28|
EPOCH[787/1000] loss0.007-|Sample:17.45|
EPOCH[788/1000] loss0.007-|Sample:17.46|
EPOCH[789/1000] loss0.007-|Sample:17.14|
EPOCH[790/1000] loss0.007-|Sample:18.04|
[TEST]
{'precision': array([0.01291055]), 'recall': array([0.03155684]), 'ndcg': array([0.02383246])}
EPOCH[791/1000] loss0.007-|Sample:16.50|
EPOCH[792/1000] loss0.007-|Sample:16.64|
EPOCH[793/1000] loss0.007-|Sample:16.79|
EPOCH[794/1000] loss0.007-|Sample:16.40|
EPOCH[795/1000] loss0.007-|Sample:16.43|
EPOCH[796/1000] loss0.007-|Sample:18.12|
EPOCH[797/1000] loss0.007-|Sample:17.21|
EPOCH[798/1000] loss0.007-|Sample:16.90|
EPOCH[799/1000] loss0.007-|Sample:17.03|
EPOCH[800/1000] loss0.007-|Sample:16.34|
[TEST]
{'precision': array([0.0129172]), 'recall': array([0.0315462]), 'ndcg': array([0.02389928])}
EPOCH[801/1000] loss0.008-|Sample:17.56|
EPOCH[802/1000] loss0.007-|Sample:17.57|
EPOCH[803/1000] loss0.008-|Sample:17.29|
EPOCH[804/1000] loss0.007-|Sample:18.34|
EPOCH[805/1000] loss0.007-|Sample:17.61|
EPOCH[806/1000] loss0.007-|Sample:17.42|
EPOCH[807/1000] loss0.007-|Sample:17.32|
EPOCH[808/1000] loss0.007-|Sample:16.56|
EPOCH[809/1000] loss0.007-|Sample:16.25|
EPOCH[810/1000] loss0.007-|Sample:18.00|
[TEST]
{'precision': array([0.01299223]), 'recall': array([0.03188176]), 'ndcg': array([0.02415272])}
EPOCH[811/1000] loss0.007-|Sample:16.31|
EPOCH[812/1000] loss0.007-|Sample:16.67|
EPOCH[813/1000] loss0.007-|Sample:16.07|
EPOCH[814/1000] loss0.007-|Sample:16.36|
EPOCH[815/1000] loss0.007-|Sample:16.75|
EPOCH[816/1000] loss0.007-|Sample:16.54|
EPOCH[817/1000] loss0.007-|Sample:16.01|
EPOCH[818/1000] loss0.007-|Sample:19.68|
EPOCH[819/1000] loss0.007-|Sample:17.36|
EPOCH[820/1000] loss0.007-|Sample:17.25|
[TEST]
{'precision': array([0.01303877]), 'recall': array([0.03188281]), 'ndcg': array([0.02411154])}
EPOCH[821/1000] loss0.007-|Sample:16.87|
EPOCH[822/1000] loss0.007-|Sample:16.06|
EPOCH[823/1000] loss0.007-|Sample:16.09|
EPOCH[824/1000] loss0.007-|Sample:18.51|
EPOCH[825/1000] loss0.007-|Sample:17.07|
EPOCH[826/1000] loss0.007-|Sample:17.50|
EPOCH[827/1000] loss0.007-|Sample:17.25|
EPOCH[828/1000] loss0.007-|Sample:16.89|
EPOCH[829/1000] loss0.007-|Sample:16.26|
EPOCH[830/1000] loss0.007-|Sample:17.50|
[TEST]
{'precision': array([0.0131499]), 'recall': array([0.03224721]), 'ndcg': array([0.02439191])}
EPOCH[831/1000] loss0.007-|Sample:17.17|
EPOCH[832/1000] loss0.007-|Sample:17.67|
EPOCH[833/1000] loss0.007-|Sample:17.56|
EPOCH[834/1000] loss0.007-|Sample:17.14|
EPOCH[835/1000] loss0.007-|Sample:16.95|
EPOCH[836/1000] loss0.007-|Sample:17.04|
EPOCH[837/1000] loss0.007-|Sample:17.14|
EPOCH[838/1000] loss0.007-|Sample:17.92|
EPOCH[839/1000] loss0.007-|Sample:17.25|
EPOCH[840/1000] loss0.007-|Sample:18.25|
[TEST]
{'precision': array([0.01317459]), 'recall': array([0.0323884]), 'ndcg': array([0.02450131])}
EPOCH[841/1000] loss0.007-|Sample:17.71|
EPOCH[842/1000] loss0.007-|Sample:17.78|
EPOCH[843/1000] loss0.007-|Sample:17.45|
EPOCH[844/1000] loss0.007-|Sample:17.53|
EPOCH[845/1000] loss0.007-|Sample:17.81|
EPOCH[846/1000] loss0.007-|Sample:16.65|
EPOCH[847/1000] loss0.007-|Sample:17.21|
EPOCH[848/1000] loss0.007-|Sample:16.59|
EPOCH[849/1000] loss0.007-|Sample:17.09|
EPOCH[850/1000] loss0.007-|Sample:16.48|
[TEST]
{'precision': array([0.01304827]), 'recall': array([0.03193724]), 'ndcg': array([0.02437724])}
EPOCH[851/1000] loss0.007-|Sample:18.40|
EPOCH[852/1000] loss0.007-|Sample:17.64|
EPOCH[853/1000] loss0.007-|Sample:18.18|
EPOCH[854/1000] loss0.007-|Sample:17.29|
EPOCH[855/1000] loss0.007-|Sample:18.18|
EPOCH[856/1000] loss0.007-|Sample:18.00|
EPOCH[857/1000] loss0.007-|Sample:18.34|
EPOCH[858/1000] loss0.007-|Sample:16.21|
EPOCH[859/1000] loss0.007-|Sample:17.51|
EPOCH[860/1000] loss0.007-|Sample:16.34|
[TEST]
{'precision': array([0.0131461]), 'recall': array([0.03222779]), 'ndcg': array([0.02444159])}
EPOCH[861/1000] loss0.007-|Sample:18.26|
EPOCH[862/1000] loss0.007-|Sample:17.73|
EPOCH[863/1000] loss0.007-|Sample:17.01|
EPOCH[864/1000] loss0.007-|Sample:17.37|
EPOCH[865/1000] loss0.007-|Sample:17.31|
EPOCH[866/1000] loss0.007-|Sample:18.00|
EPOCH[867/1000] loss0.007-|Sample:17.09|
EPOCH[868/1000] loss0.007-|Sample:16.57|
EPOCH[869/1000] loss0.007-|Sample:16.31|
EPOCH[870/1000] loss0.007-|Sample:16.17|
[TEST]
{'precision': array([0.01309576]), 'recall': array([0.03188355]), 'ndcg': array([0.0242583])}
EPOCH[871/1000] loss0.007-|Sample:17.25|
EPOCH[872/1000] loss0.007-|Sample:18.01|
EPOCH[873/1000] loss0.007-|Sample:16.89|
EPOCH[874/1000] loss0.007-|Sample:17.93|
EPOCH[875/1000] loss0.007-|Sample:17.71|
EPOCH[876/1000] loss0.007-|Sample:17.34|
EPOCH[877/1000] loss0.007-|Sample:16.40|
EPOCH[878/1000] loss0.007-|Sample:17.36|
EPOCH[879/1000] loss0.007-|Sample:16.17|
EPOCH[880/1000] loss0.007-|Sample:16.17|
[TEST]
{'precision': array([0.01317269]), 'recall': array([0.03220317]), 'ndcg': array([0.02450498])}
EPOCH[881/1000] loss0.007-|Sample:17.23|
EPOCH[882/1000] loss0.007-|Sample:17.79|
EPOCH[883/1000] loss0.007-|Sample:18.14|
EPOCH[884/1000] loss0.007-|Sample:16.26|
EPOCH[885/1000] loss0.007-|Sample:16.23|
EPOCH[886/1000] loss0.007-|Sample:17.25|
EPOCH[887/1000] loss0.007-|Sample:16.14|
EPOCH[888/1000] loss0.007-|Sample:18.79|
EPOCH[889/1000] loss0.007-|Sample:18.48|
EPOCH[890/1000] loss0.007-|Sample:17.26|
[TEST]
{'precision': array([0.01313565]), 'recall': array([0.03221146]), 'ndcg': array([0.02462241])}
EPOCH[891/1000] loss0.007-|Sample:18.23|
EPOCH[892/1000] loss0.007-|Sample:16.68|
EPOCH[893/1000] loss0.007-|Sample:16.79|
EPOCH[894/1000] loss0.007-|Sample:18.50|
EPOCH[895/1000] loss0.007-|Sample:17.61|
EPOCH[896/1000] loss0.007-|Sample:17.31|
EPOCH[897/1000] loss0.007-|Sample:18.39|
EPOCH[898/1000] loss0.007-|Sample:16.06|
EPOCH[899/1000] loss0.007-|Sample:17.18|
EPOCH[900/1000] loss0.007-|Sample:16.81|
[TEST]
{'precision': array([0.01324773]), 'recall': array([0.03243464]), 'ndcg': array([0.02477783])}
EPOCH[901/1000] loss0.007-|Sample:16.48|
EPOCH[902/1000] loss0.007-|Sample:17.11|
EPOCH[903/1000] loss0.007-|Sample:18.32|
EPOCH[904/1000] loss0.007-|Sample:17.34|
EPOCH[905/1000] loss0.007-|Sample:18.46|
EPOCH[906/1000] loss0.007-|Sample:17.14|
EPOCH[907/1000] loss0.007-|Sample:18.31|
EPOCH[908/1000] loss0.007-|Sample:16.90|
EPOCH[909/1000] loss0.007-|Sample:16.61|
EPOCH[910/1000] loss0.007-|Sample:16.43|
[TEST]
{'precision': array([0.01329901]), 'recall': array([0.03265218]), 'ndcg': array([0.02479423])}
EPOCH[911/1000] loss0.007-|Sample:15.76|
EPOCH[912/1000] loss0.007-|Sample:16.15|
EPOCH[913/1000] loss0.007-|Sample:17.89|
EPOCH[914/1000] loss0.007-|Sample:16.28|
EPOCH[915/1000] loss0.007-|Sample:16.62|
EPOCH[916/1000] loss0.007-|Sample:17.04|
EPOCH[917/1000] loss0.007-|Sample:17.59|
EPOCH[918/1000] loss0.007-|Sample:17.42|
EPOCH[919/1000] loss0.007-|Sample:18.84|
EPOCH[920/1000] loss0.007-|Sample:16.31|
[TEST]
{'precision': array([0.01336645]), 'recall': array([0.03271214]), 'ndcg': array([0.0247437])}
EPOCH[921/1000] loss0.007-|Sample:18.04|
EPOCH[922/1000] loss0.007-|Sample:16.89|
EPOCH[923/1000] loss0.007-|Sample:17.15|
EPOCH[924/1000] loss0.007-|Sample:18.40|
EPOCH[925/1000] loss0.007-|Sample:16.21|
EPOCH[926/1000] loss0.007-|Sample:16.26|
EPOCH[927/1000] loss0.007-|Sample:18.25|
EPOCH[928/1000] loss0.007-|Sample:17.15|
EPOCH[929/1000] loss0.007-|Sample:17.17|
EPOCH[930/1000] loss0.007-|Sample:17.84|
[TEST]
{'precision': array([0.0133598]), 'recall': array([0.03264507]), 'ndcg': array([0.02473364])}
EPOCH[931/1000] loss0.007-|Sample:16.28|
EPOCH[932/1000] loss0.007-|Sample:16.12|
EPOCH[933/1000] loss0.007-|Sample:16.48|
EPOCH[934/1000] loss0.007-|Sample:16.84|
EPOCH[935/1000] loss0.007-|Sample:16.25|
EPOCH[936/1000] loss0.007-|Sample:16.46|
EPOCH[937/1000] loss0.007-|Sample:17.79|
EPOCH[938/1000] loss0.007-|Sample:16.29|
EPOCH[939/1000] loss0.007-|Sample:17.46|
EPOCH[940/1000] loss0.007-|Sample:16.46|
[TEST]
{'precision': array([0.01337595]), 'recall': array([0.03270798]), 'ndcg': array([0.02472182])}
EPOCH[941/1000] loss0.007-|Sample:17.90|
EPOCH[942/1000] loss0.007-|Sample:16.73|
EPOCH[943/1000] loss0.007-|Sample:17.65|
EPOCH[944/1000] loss0.007-|Sample:17.11|
EPOCH[945/1000] loss0.007-|Sample:17.57|
EPOCH[946/1000] loss0.007-|Sample:16.70|
EPOCH[947/1000] loss0.007-|Sample:19.65|
EPOCH[948/1000] loss0.007-|Sample:16.06|
EPOCH[949/1000] loss0.007-|Sample:16.93|
EPOCH[950/1000] loss0.007-|Sample:17.20|
[TEST]
{'precision': array([0.01335505]), 'recall': array([0.03262455]), 'ndcg': array([0.02464006])}
EPOCH[951/1000] loss0.007-|Sample:16.07|
EPOCH[952/1000] loss0.007-|Sample:16.89|
EPOCH[953/1000] loss0.007-|Sample:16.36|
EPOCH[954/1000] loss0.007-|Sample:16.14|
EPOCH[955/1000] loss0.007-|Sample:18.79|
EPOCH[956/1000] loss0.007-|Sample:16.23|
EPOCH[957/1000] loss0.007-|Sample:17.14|
EPOCH[958/1000] loss0.007-|Sample:17.95|
EPOCH[959/1000] loss0.007-|Sample:17.64|
EPOCH[960/1000] loss0.007-|Sample:17.15|
[TEST]
{'precision': array([0.01328192]), 'recall': array([0.03246567]), 'ndcg': array([0.02458817])}
EPOCH[961/1000] loss0.007-|Sample:17.81|
EPOCH[962/1000] loss0.007-|Sample:17.37|
EPOCH[963/1000] loss0.007-|Sample:17.61|
EPOCH[964/1000] loss0.007-|Sample:17.18|
EPOCH[965/1000] loss0.007-|Sample:17.31|
EPOCH[966/1000] loss0.007-|Sample:17.62|
EPOCH[967/1000] loss0.007-|Sample:17.64|
EPOCH[968/1000] loss0.007-|Sample:17.43|
EPOCH[969/1000] loss0.007-|Sample:18.17|
EPOCH[970/1000] loss0.007-|Sample:17.31|
[TEST]
{'precision': array([0.01345193]), 'recall': array([0.03290292]), 'ndcg': array([0.02499927])}
EPOCH[971/1000] loss0.007-|Sample:16.42|
EPOCH[972/1000] loss0.007-|Sample:17.07|
EPOCH[973/1000] loss0.007-|Sample:16.20|
EPOCH[974/1000] loss0.007-|Sample:16.70|
EPOCH[975/1000] loss0.007-|Sample:18.12|
EPOCH[976/1000] loss0.007-|Sample:16.23|
EPOCH[977/1000] loss0.007-|Sample:17.64|
EPOCH[978/1000] loss0.007-|Sample:17.00|
EPOCH[979/1000] loss0.007-|Sample:17.46|
EPOCH[980/1000] loss0.007-|Sample:16.61|
[TEST]
{'precision': array([0.01337975]), 'recall': array([0.03279804]), 'ndcg': array([0.02487123])}
EPOCH[981/1000] loss0.007-|Sample:17.48|
EPOCH[982/1000] loss0.007-|Sample:16.90|
EPOCH[983/1000] loss0.007-|Sample:17.73|
EPOCH[984/1000] loss0.007-|Sample:16.90|
EPOCH[985/1000] loss0.007-|Sample:17.79|
EPOCH[986/1000] loss0.007-|Sample:17.70|
EPOCH[987/1000] loss0.007-|Sample:16.56|
EPOCH[988/1000] loss0.007-|Sample:16.54|
EPOCH[989/1000] loss0.007-|Sample:18.62|
EPOCH[990/1000] loss0.007-|Sample:17.45|
[TEST]
{'precision': array([0.01340254]), 'recall': array([0.03271093]), 'ndcg': array([0.02483238])}
EPOCH[991/1000] loss0.007-|Sample:16.64|
EPOCH[992/1000] loss0.007-|Sample:17.23|
EPOCH[993/1000] loss0.007-|Sample:16.42|
EPOCH[994/1000] loss0.007-|Sample:17.87|
EPOCH[995/1000] loss0.007-|Sample:17.57|
EPOCH[996/1000] loss0.007-|Sample:16.25|
EPOCH[997/1000] loss0.007-|Sample:17.89|
EPOCH[998/1000] loss0.007-|Sample:17.15|
EPOCH[999/1000] loss0.007-|Sample:16.06|
EPOCH[1000/1000] loss0.007-|Sample:16.98|

Process finished with exit code 0


model:lgn layer:1
D:\ProgramFiles\Anaconda3\envs\image_caption_python36\python.exe D:/workspace/LightGcn/LightGCN-PyTorch-master/code/main.py
Cpp extension not loaded
>>SEED: 2020
loading [../data/amazon-book]
2380730 interactions for training
603382 interactions for testing
amazon-book Sparsity : 0.0006188476640083725
amazon-book is ready to go
===========config================
{'A_n_fold': 100,
 'A_split': False,
 'bigdata': False,
 'bpr_batch_size': 2048,
 'decay': 0.0001,
 'dropout': 0,
 'keep_prob': 0.6,
 'latent_dim_rec': 64,
 'lightGCN_n_layers': 1,
 'lr': 0.001,
 'multicore': 0,
 'pretrain': 0,
 'test_u_batch_size': 100}
cores for test: 6
comment: lgn
tensorboard: 1
LOAD: 0
Weight path: ./checkpoints
Test Topks: [20]
using bpr loss
===========end===================
use NORMAL distribution initilizer
loading adjacency matrix
successfully loaded...
don't split the matrix
lgn is already to go(dropout:0)
load and save to /home/qhc/下载/LightGCN-PyTorch-master\code\checkpoints\lgn-amazon-book-1-64.pth.tar
[TEST]
{'precision': array([0.00011398]), 'recall': array([0.00020748]), 'ndcg': array([0.00016859])}
EPOCH[1/1000] loss0.637-|Sample:14.98|
EPOCH[2/1000] loss0.329-|Sample:15.31|
EPOCH[3/1000] loss0.187-|Sample:15.53|
EPOCH[4/1000] loss0.140-|Sample:15.11|
EPOCH[5/1000] loss0.114-|Sample:15.67|
EPOCH[6/1000] loss0.096-|Sample:15.84|
EPOCH[7/1000] loss0.084-|Sample:16.28|
EPOCH[8/1000] loss0.074-|Sample:15.23|
EPOCH[9/1000] loss0.067-|Sample:15.07|
EPOCH[10/1000] loss0.061-|Sample:15.00|
[TEST]
{'precision': array([0.0119997]), 'recall': array([0.02773192]), 'ndcg': array([0.02174019])}
EPOCH[11/1000] loss0.056-|Sample:16.72|
EPOCH[12/1000] loss0.052-|Sample:15.28|
EPOCH[13/1000] loss0.048-|Sample:16.37|
EPOCH[14/1000] loss0.045-|Sample:17.40|
EPOCH[15/1000] loss0.042-|Sample:18.03|
EPOCH[16/1000] loss0.040-|Sample:17.25|
EPOCH[17/1000] loss0.038-|Sample:16.70|
EPOCH[18/1000] loss0.036-|Sample:16.71|
EPOCH[19/1000] loss0.034-|Sample:16.84|
EPOCH[20/1000] loss0.033-|Sample:16.51|
[TEST]
{'precision': array([0.01324393]), 'recall': array([0.03120252]), 'ndcg': array([0.0243212])}
EPOCH[21/1000] loss0.031-|Sample:17.56|
EPOCH[22/1000] loss0.030-|Sample:18.96|
EPOCH[23/1000] loss0.029-|Sample:17.12|
EPOCH[24/1000] loss0.028-|Sample:16.09|
EPOCH[25/1000] loss0.027-|Sample:16.36|
EPOCH[26/1000] loss0.026-|Sample:17.86|
EPOCH[27/1000] loss0.025-|Sample:18.51|
EPOCH[28/1000] loss0.025-|Sample:17.93|
EPOCH[29/1000] loss0.024-|Sample:18.67|
EPOCH[30/1000] loss0.023-|Sample:17.03|
[TEST]
{'precision': array([0.01390973]), 'recall': array([0.03317082]), 'ndcg': array([0.02579829])}
EPOCH[31/1000] loss0.023-|Sample:17.17|
EPOCH[32/1000] loss0.022-|Sample:17.56|
EPOCH[33/1000] loss0.022-|Sample:18.06|
EPOCH[34/1000] loss0.021-|Sample:17.53|
EPOCH[35/1000] loss0.021-|Sample:17.56|
EPOCH[36/1000] loss0.020-|Sample:18.17|
EPOCH[37/1000] loss0.020-|Sample:17.17|
EPOCH[38/1000] loss0.020-|Sample:17.84|
EPOCH[39/1000] loss0.019-|Sample:18.34|
EPOCH[40/1000] loss0.019-|Sample:16.92|
[TEST]
{'precision': array([0.0140636]), 'recall': array([0.03366846]), 'ndcg': array([0.02617814])}
EPOCH[41/1000] loss0.018-|Sample:18.26|
EPOCH[42/1000] loss0.018-|Sample:17.00|
EPOCH[43/1000] loss0.018-|Sample:18.46|
EPOCH[44/1000] loss0.018-|Sample:18.20|
EPOCH[45/1000] loss0.017-|Sample:18.06|
EPOCH[46/1000] loss0.017-|Sample:16.34|
EPOCH[47/1000] loss0.017-|Sample:18.01|
EPOCH[48/1000] loss0.017-|Sample:17.57|
EPOCH[49/1000] loss0.016-|Sample:16.61|
EPOCH[50/1000] loss0.016-|Sample:17.86|
[TEST]
{'precision': array([0.01420702]), 'recall': array([0.03412954]), 'ndcg': array([0.02648026])}
EPOCH[51/1000] loss0.016-|Sample:17.96|
EPOCH[52/1000] loss0.016-|Sample:17.48|
EPOCH[53/1000] loss0.016-|Sample:17.07|
EPOCH[54/1000] loss0.015-|Sample:18.40|
EPOCH[55/1000] loss0.015-|Sample:16.39|
EPOCH[56/1000] loss0.015-|Sample:17.39|
EPOCH[57/1000] loss0.015-|Sample:18.26|
EPOCH[58/1000] loss0.015-|Sample:18.11|
EPOCH[59/1000] loss0.015-|Sample:18.32|
EPOCH[60/1000] loss0.015-|Sample:17.92|
[TEST]
{'precision': array([0.01429155]), 'recall': array([0.03446386]), 'ndcg': array([0.02673523])}
EPOCH[61/1000] loss0.015-|Sample:18.48|
EPOCH[62/1000] loss0.014-|Sample:18.48|
EPOCH[63/1000] loss0.014-|Sample:18.31|
EPOCH[64/1000] loss0.014-|Sample:17.03|
EPOCH[65/1000] loss0.014-|Sample:17.79|
EPOCH[66/1000] loss0.014-|Sample:18.23|
EPOCH[67/1000] loss0.014-|Sample:18.40|
EPOCH[68/1000] loss0.014-|Sample:18.03|
EPOCH[69/1000] loss0.014-|Sample:18.03|
EPOCH[70/1000] loss0.014-|Sample:16.26|
[TEST]
{'precision': array([0.01442452]), 'recall': array([0.03475893]), 'ndcg': array([0.02699636])}
EPOCH[71/1000] loss0.013-|Sample:17.01|
EPOCH[72/1000] loss0.013-|Sample:16.34|
EPOCH[73/1000] loss0.013-|Sample:17.40|
EPOCH[74/1000] loss0.013-|Sample:17.20|
EPOCH[75/1000] loss0.013-|Sample:17.56|
EPOCH[76/1000] loss0.013-|Sample:16.65|
EPOCH[77/1000] loss0.013-|Sample:17.93|
EPOCH[78/1000] loss0.013-|Sample:16.73|
EPOCH[79/1000] loss0.013-|Sample:17.54|
EPOCH[80/1000] loss0.013-|Sample:17.73|
[TEST]
{'precision': array([0.01433049]), 'recall': array([0.03454482]), 'ndcg': array([0.02683639])}
EPOCH[81/1000] loss0.013-|Sample:17.43|
EPOCH[82/1000] loss0.013-|Sample:17.00|
EPOCH[83/1000] loss0.013-|Sample:18.39|
EPOCH[84/1000] loss0.012-|Sample:18.45|
EPOCH[85/1000] loss0.012-|Sample:17.90|
EPOCH[86/1000] loss0.012-|Sample:17.87|
EPOCH[87/1000] loss0.012-|Sample:17.36|
EPOCH[88/1000] loss0.012-|Sample:18.03|
EPOCH[89/1000] loss0.012-|Sample:15.62|
EPOCH[90/1000] loss0.012-|Sample:15.43|
[TEST]
{'precision': array([0.01444542]), 'recall': array([0.03475472]), 'ndcg': array([0.02699953])}
EPOCH[91/1000] loss0.012-|Sample:15.50|
EPOCH[92/1000] loss0.012-|Sample:17.37|
EPOCH[93/1000] loss0.012-|Sample:17.00|
EPOCH[94/1000] loss0.012-|Sample:16.36|
EPOCH[95/1000] loss0.012-|Sample:16.95|
EPOCH[96/1000] loss0.012-|Sample:18.61|
EPOCH[97/1000] loss0.012-|Sample:17.92|
EPOCH[98/1000] loss0.012-|Sample:16.82|
EPOCH[99/1000] loss0.012-|Sample:16.68|
EPOCH[100/1000] loss0.012-|Sample:16.70|
[TEST]
{'precision': array([0.01445681]), 'recall': array([0.034809]), 'ndcg': array([0.0270374])}
EPOCH[101/1000] loss0.012-|Sample:17.43|
EPOCH[102/1000] loss0.012-|Sample:16.68|
EPOCH[103/1000] loss0.012-|Sample:16.71|
EPOCH[104/1000] loss0.012-|Sample:16.62|
EPOCH[105/1000] loss0.011-|Sample:17.90|
EPOCH[106/1000] loss0.012-|Sample:16.26|
EPOCH[107/1000] loss0.011-|Sample:17.71|
EPOCH[108/1000] loss0.011-|Sample:17.32|
EPOCH[109/1000] loss0.011-|Sample:16.61|
EPOCH[110/1000] loss0.011-|Sample:17.95|
[TEST]
{'precision': array([0.01445016]), 'recall': array([0.03490806]), 'ndcg': array([0.02713654])}
EPOCH[111/1000] loss0.011-|Sample:18.01|
EPOCH[112/1000] loss0.011-|Sample:17.86|
EPOCH[113/1000] loss0.011-|Sample:18.95|
EPOCH[114/1000] loss0.011-|Sample:17.98|
EPOCH[115/1000] loss0.011-|Sample:17.86|
EPOCH[116/1000] loss0.011-|Sample:16.67|
EPOCH[117/1000] loss0.011-|Sample:16.93|
EPOCH[118/1000] loss0.011-|Sample:16.39|
EPOCH[119/1000] loss0.011-|Sample:18.11|
EPOCH[120/1000] loss0.011-|Sample:16.78|
[TEST]
{'precision': array([0.01445776]), 'recall': array([0.03487302]), 'ndcg': array([0.02706006])}
EPOCH[121/1000] loss0.011-|Sample:17.01|
EPOCH[122/1000] loss0.011-|Sample:18.01|
EPOCH[123/1000] loss0.011-|Sample:18.20|
EPOCH[124/1000] loss0.011-|Sample:17.64|
EPOCH[125/1000] loss0.011-|Sample:17.20|
EPOCH[126/1000] loss0.011-|Sample:18.15|
EPOCH[127/1000] loss0.011-|Sample:18.46|
EPOCH[128/1000] loss0.011-|Sample:16.62|
EPOCH[129/1000] loss0.011-|Sample:16.51|
EPOCH[130/1000] loss0.011-|Sample:16.18|
[TEST]
{'precision': array([0.01449291]), 'recall': array([0.03490517]), 'ndcg': array([0.02707512])}
EPOCH[131/1000] loss0.011-|Sample:18.07|
EPOCH[132/1000] loss0.011-|Sample:18.09|
EPOCH[133/1000] loss0.011-|Sample:18.31|
EPOCH[134/1000] loss0.011-|Sample:16.23|
EPOCH[135/1000] loss0.011-|Sample:18.04|
EPOCH[136/1000] loss0.011-|Sample:17.96|
EPOCH[137/1000] loss0.011-|Sample:19.17|
EPOCH[138/1000] loss0.011-|Sample:18.61|
EPOCH[139/1000] loss0.011-|Sample:16.37|
EPOCH[140/1000] loss0.010-|Sample:16.59|
[TEST]
{'precision': array([0.01445111]), 'recall': array([0.03490033]), 'ndcg': array([0.02710451])}
EPOCH[141/1000] loss0.010-|Sample:17.01|
EPOCH[142/1000] loss0.011-|Sample:18.57|
EPOCH[143/1000] loss0.011-|Sample:17.61|
EPOCH[144/1000] loss0.010-|Sample:17.04|
EPOCH[145/1000] loss0.010-|Sample:16.93|
EPOCH[146/1000] loss0.011-|Sample:19.42|
EPOCH[147/1000] loss0.010-|Sample:18.61|
EPOCH[148/1000] loss0.011-|Sample:16.42|
EPOCH[149/1000] loss0.010-|Sample:18.34|
EPOCH[150/1000] loss0.010-|Sample:17.42|
[TEST]
{'precision': array([0.01457649]), 'recall': array([0.03529983]), 'ndcg': array([0.02740838])}
EPOCH[151/1000] loss0.010-|Sample:17.42|
EPOCH[152/1000] loss0.010-|Sample:17.12|
EPOCH[153/1000] loss0.010-|Sample:18.00|
EPOCH[154/1000] loss0.010-|Sample:18.34|
EPOCH[155/1000] loss0.010-|Sample:16.34|
EPOCH[156/1000] loss0.010-|Sample:17.67|
EPOCH[157/1000] loss0.010-|Sample:18.61|
EPOCH[158/1000] loss0.010-|Sample:18.85|
EPOCH[159/1000] loss0.010-|Sample:16.51|
EPOCH[160/1000] loss0.010-|Sample:18.25|
[TEST]
{'precision': array([0.01460878]), 'recall': array([0.03543817]), 'ndcg': array([0.0275504])}
EPOCH[161/1000] loss0.010-|Sample:19.10|
EPOCH[162/1000] loss0.010-|Sample:18.53|
EPOCH[163/1000] loss0.010-|Sample:17.78|
EPOCH[164/1000] loss0.010-|Sample:18.18|
EPOCH[165/1000] loss0.010-|Sample:17.93|
EPOCH[166/1000] loss0.010-|Sample:18.36|
EPOCH[167/1000] loss0.010-|Sample:18.68|
EPOCH[168/1000] loss0.010-|Sample:17.86|
EPOCH[169/1000] loss0.010-|Sample:16.43|
EPOCH[170/1000] loss0.010-|Sample:17.64|
[TEST]
{'precision': array([0.01466482]), 'recall': array([0.0354315]), 'ndcg': array([0.02759879])}
EPOCH[171/1000] loss0.010-|Sample:16.67|
EPOCH[172/1000] loss0.010-|Sample:17.00|
EPOCH[173/1000] loss0.010-|Sample:18.96|
EPOCH[174/1000] loss0.010-|Sample:17.31|
EPOCH[175/1000] loss0.010-|Sample:17.96|
EPOCH[176/1000] loss0.010-|Sample:18.79|
EPOCH[177/1000] loss0.010-|Sample:17.34|
EPOCH[178/1000] loss0.010-|Sample:17.20|
EPOCH[179/1000] loss0.010-|Sample:17.92|
EPOCH[180/1000] loss0.010-|Sample:18.79|
[TEST]
{'precision': array([0.01458029]), 'recall': array([0.03539314]), 'ndcg': array([0.02738828])}
EPOCH[181/1000] loss0.010-|Sample:18.07|
EPOCH[182/1000] loss0.010-|Sample:18.82|
EPOCH[183/1000] loss0.010-|Sample:17.37|
EPOCH[184/1000] loss0.010-|Sample:16.29|
EPOCH[185/1000] loss0.010-|Sample:17.37|
EPOCH[186/1000] loss0.010-|Sample:17.37|
EPOCH[187/1000] loss0.010-|Sample:17.03|
EPOCH[188/1000] loss0.010-|Sample:18.28|
EPOCH[189/1000] loss0.010-|Sample:16.56|
EPOCH[190/1000] loss0.010-|Sample:16.15|
[TEST]
{'precision': array([0.0147541]), 'recall': array([0.03582179]), 'ndcg': array([0.0277341])}
EPOCH[191/1000] loss0.010-|Sample:16.70|
EPOCH[192/1000] loss0.010-|Sample:16.78|
EPOCH[193/1000] loss0.010-|Sample:17.70|
EPOCH[194/1000] loss0.010-|Sample:18.56|
EPOCH[195/1000] loss0.010-|Sample:17.93|
EPOCH[196/1000] loss0.010-|Sample:17.31|
EPOCH[197/1000] loss0.010-|Sample:17.46|
EPOCH[198/1000] loss0.010-|Sample:18.25|
EPOCH[199/1000] loss0.010-|Sample:17.75|
EPOCH[200/1000] loss0.010-|Sample:17.36|
[TEST]
{'precision': array([0.0147427]), 'recall': array([0.03570698]), 'ndcg': array([0.02758299])}
EPOCH[201/1000] loss0.010-|Sample:16.75|
EPOCH[202/1000] loss0.010-|Sample:18.06|
EPOCH[203/1000] loss0.010-|Sample:17.43|
EPOCH[204/1000] loss0.010-|Sample:17.04|
EPOCH[205/1000] loss0.010-|Sample:17.45|
EPOCH[206/1000] loss0.010-|Sample:16.96|
EPOCH[207/1000] loss0.010-|Sample:16.79|
EPOCH[208/1000] loss0.010-|Sample:17.68|
EPOCH[209/1000] loss0.010-|Sample:18.03|
EPOCH[210/1000] loss0.010-|Sample:18.40|
[TEST]
{'precision': array([0.01489752]), 'recall': array([0.03617264]), 'ndcg': array([0.0278758])}
EPOCH[211/1000] loss0.010-|Sample:17.92|
EPOCH[212/1000] loss0.010-|Sample:16.40|
EPOCH[213/1000] loss0.010-|Sample:17.67|
EPOCH[214/1000] loss0.010-|Sample:17.81|
EPOCH[215/1000] loss0.010-|Sample:16.57|
EPOCH[216/1000] loss0.010-|Sample:18.25|
EPOCH[217/1000] loss0.010-|Sample:17.46|
EPOCH[218/1000] loss0.010-|Sample:16.34|
EPOCH[219/1000] loss0.010-|Sample:18.31|
EPOCH[220/1000] loss0.010-|Sample:17.26|
[TEST]
{'precision': array([0.01488422]), 'recall': array([0.03622963]), 'ndcg': array([0.0278668])}
EPOCH[221/1000] loss0.010-|Sample:18.14|
EPOCH[222/1000] loss0.010-|Sample:17.48|
EPOCH[223/1000] loss0.010-|Sample:18.04|
EPOCH[224/1000] loss0.010-|Sample:18.59|
EPOCH[225/1000] loss0.010-|Sample:17.20|
EPOCH[226/1000] loss0.010-|Sample:16.64|
EPOCH[227/1000] loss0.010-|Sample:17.81|
EPOCH[228/1000] loss0.010-|Sample:17.67|
EPOCH[229/1000] loss0.010-|Sample:16.64|
EPOCH[230/1000] loss0.010-|Sample:18.07|
[TEST]
{'precision': array([0.01491556]), 'recall': array([0.03613236]), 'ndcg': array([0.02780648])}
EPOCH[231/1000] loss0.010-|Sample:16.73|
EPOCH[232/1000] loss0.010-|Sample:16.84|
EPOCH[233/1000] loss0.010-|Sample:16.86|
EPOCH[234/1000] loss0.010-|Sample:16.78|
EPOCH[235/1000] loss0.010-|Sample:17.39|
EPOCH[236/1000] loss0.010-|Sample:17.82|
EPOCH[237/1000] loss0.010-|Sample:17.62|
EPOCH[238/1000] loss0.010-|Sample:17.61|
EPOCH[239/1000] loss0.010-|Sample:17.12|
EPOCH[240/1000] loss0.010-|Sample:16.82|
[TEST]
{'precision': array([0.01495071]), 'recall': array([0.03632386]), 'ndcg': array([0.027968])}
EPOCH[241/1000] loss0.010-|Sample:16.67|
EPOCH[242/1000] loss0.010-|Sample:16.90|
EPOCH[243/1000] loss0.010-|Sample:17.89|
EPOCH[244/1000] loss0.010-|Sample:18.28|
EPOCH[245/1000] loss0.010-|Sample:16.75|
EPOCH[246/1000] loss0.010-|Sample:17.45|
EPOCH[247/1000] loss0.010-|Sample:18.04|
EPOCH[248/1000] loss0.010-|Sample:17.32|
EPOCH[249/1000] loss0.010-|Sample:16.18|
EPOCH[250/1000] loss0.010-|Sample:16.21|
[TEST]
{'precision': array([0.01483673]), 'recall': array([0.03607525]), 'ndcg': array([0.02787374])}
EPOCH[251/1000] loss0.010-|Sample:16.56|
EPOCH[252/1000] loss0.010-|Sample:18.48|
EPOCH[253/1000] loss0.010-|Sample:17.12|
EPOCH[254/1000] loss0.010-|Sample:16.21|
EPOCH[255/1000] loss0.010-|Sample:17.71|
EPOCH[256/1000] loss0.010-|Sample:17.32|
EPOCH[257/1000] loss0.010-|Sample:16.71|
EPOCH[258/1000] loss0.010-|Sample:18.84|
EPOCH[259/1000] loss0.010-|Sample:18.32|
EPOCH[260/1000] loss0.010-|Sample:17.54|
[TEST]
{'precision': array([0.01496115]), 'recall': array([0.03634042]), 'ndcg': array([0.02808078])}
EPOCH[261/1000] loss0.010-|Sample:18.18|
EPOCH[262/1000] loss0.010-|Sample:17.28|
EPOCH[263/1000] loss0.010-|Sample:17.43|
EPOCH[264/1000] loss0.010-|Sample:17.54|
EPOCH[265/1000] loss0.009-|Sample:17.31|
EPOCH[266/1000] loss0.010-|Sample:18.76|
EPOCH[267/1000] loss0.009-|Sample:16.90|
EPOCH[268/1000] loss0.010-|Sample:17.39|
EPOCH[269/1000] loss0.009-|Sample:18.61|
EPOCH[270/1000] loss0.009-|Sample:18.57|
[TEST]
{'precision': array([0.01483958]), 'recall': array([0.03603319]), 'ndcg': array([0.02792632])}
EPOCH[271/1000] loss0.009-|Sample:15.98|
EPOCH[272/1000] loss0.009-|Sample:16.65|
EPOCH[273/1000] loss0.009-|Sample:17.03|
EPOCH[274/1000] loss0.009-|Sample:16.89|
EPOCH[275/1000] loss0.009-|Sample:17.37|
EPOCH[276/1000] loss0.009-|Sample:16.90|
EPOCH[277/1000] loss0.009-|Sample:18.85|
EPOCH[278/1000] loss0.009-|Sample:16.43|
EPOCH[279/1000] loss0.009-|Sample:17.71|
EPOCH[280/1000] loss0.009-|Sample:16.42|
[TEST]
{'precision': array([0.01488422]), 'recall': array([0.03629318]), 'ndcg': array([0.02783606])}
EPOCH[281/1000] loss0.009-|Sample:16.76|
EPOCH[282/1000] loss0.009-|Sample:18.23|
EPOCH[283/1000] loss0.009-|Sample:17.26|
EPOCH[284/1000] loss0.009-|Sample:18.03|
EPOCH[285/1000] loss0.009-|Sample:18.37|
EPOCH[286/1000] loss0.009-|Sample:18.45|
EPOCH[287/1000] loss0.009-|Sample:17.81|
EPOCH[288/1000] loss0.009-|Sample:16.81|
EPOCH[289/1000] loss0.009-|Sample:18.68|
EPOCH[290/1000] loss0.009-|Sample:17.90|
[TEST]
{'precision': array([0.01491556]), 'recall': array([0.03632959]), 'ndcg': array([0.02794992])}
EPOCH[291/1000] loss0.009-|Sample:16.86|
EPOCH[292/1000] loss0.009-|Sample:16.06|
EPOCH[293/1000] loss0.010-|Sample:17.78|
EPOCH[294/1000] loss0.009-|Sample:17.34|
EPOCH[295/1000] loss0.009-|Sample:16.36|
EPOCH[296/1000] loss0.009-|Sample:17.89|
EPOCH[297/1000] loss0.009-|Sample:17.50|
EPOCH[298/1000] loss0.009-|Sample:16.37|
EPOCH[299/1000] loss0.009-|Sample:17.62|
EPOCH[300/1000] loss0.009-|Sample:16.53|
[TEST]
{'precision': array([0.01503619]), 'recall': array([0.03666423]), 'ndcg': array([0.02818815])}
EPOCH[301/1000] loss0.009-|Sample:17.57|
EPOCH[302/1000] loss0.009-|Sample:18.28|
EPOCH[303/1000] loss0.009-|Sample:18.12|
EPOCH[304/1000] loss0.009-|Sample:18.07|
EPOCH[305/1000] loss0.009-|Sample:17.95|
EPOCH[306/1000] loss0.009-|Sample:17.15|
EPOCH[307/1000] loss0.009-|Sample:18.89|
EPOCH[308/1000] loss0.009-|Sample:17.81|
EPOCH[309/1000] loss0.009-|Sample:18.32|
EPOCH[310/1000] loss0.009-|Sample:17.28|
[TEST]
{'precision': array([0.01500294]), 'recall': array([0.03650851]), 'ndcg': array([0.02808149])}
EPOCH[311/1000] loss0.009-|Sample:17.54|
EPOCH[312/1000] loss0.009-|Sample:16.12|
EPOCH[313/1000] loss0.009-|Sample:17.75|
EPOCH[314/1000] loss0.009-|Sample:19.06|
EPOCH[315/1000] loss0.009-|Sample:16.65|
EPOCH[316/1000] loss0.009-|Sample:16.43|
EPOCH[317/1000] loss0.009-|Sample:18.18|
EPOCH[318/1000] loss0.009-|Sample:17.11|
EPOCH[319/1000] loss0.009-|Sample:16.42|
EPOCH[320/1000] loss0.009-|Sample:17.48|
[TEST]
{'precision': array([0.01504663]), 'recall': array([0.03684905]), 'ndcg': array([0.02829082])}
EPOCH[321/1000] loss0.009-|Sample:18.26|
EPOCH[322/1000] loss0.009-|Sample:17.15|
EPOCH[323/1000] loss0.009-|Sample:16.75|
EPOCH[324/1000] loss0.009-|Sample:17.14|
EPOCH[325/1000] loss0.009-|Sample:17.53|
EPOCH[326/1000] loss0.009-|Sample:17.25|
EPOCH[327/1000] loss0.009-|Sample:17.59|
EPOCH[328/1000] loss0.009-|Sample:17.76|
EPOCH[329/1000] loss0.009-|Sample:16.29|
EPOCH[330/1000] loss0.009-|Sample:17.40|
[TEST]
{'precision': array([0.01503334]), 'recall': array([0.03669547]), 'ndcg': array([0.02834235])}
EPOCH[331/1000] loss0.009-|Sample:17.34|
EPOCH[332/1000] loss0.009-|Sample:18.34|
EPOCH[333/1000] loss0.009-|Sample:16.98|
EPOCH[334/1000] loss0.009-|Sample:15.04|
EPOCH[335/1000] loss0.009-|Sample:15.32|
EPOCH[336/1000] loss0.009-|Sample:15.40|
EPOCH[337/1000] loss0.009-|Sample:15.31|
EPOCH[338/1000] loss0.009-|Sample:15.62|
EPOCH[339/1000] loss0.009-|Sample:15.73|
EPOCH[340/1000] loss0.009-|Sample:15.93|
[TEST]
{'precision': array([0.01496115]), 'recall': array([0.03666908]), 'ndcg': array([0.02830754])}
EPOCH[341/1000] loss0.009-|Sample:15.17|
EPOCH[342/1000] loss0.009-|Sample:15.59|
EPOCH[343/1000] loss0.009-|Sample:15.97|
EPOCH[344/1000] loss0.009-|Sample:15.28|
EPOCH[345/1000] loss0.009-|Sample:15.70|
EPOCH[346/1000] loss0.009-|Sample:15.67|
EPOCH[347/1000] loss0.009-|Sample:15.34|
EPOCH[348/1000] loss0.009-|Sample:15.78|
EPOCH[349/1000] loss0.009-|Sample:15.34|
EPOCH[350/1000] loss0.009-|Sample:16.00|
[TEST]
{'precision': array([0.01502004]), 'recall': array([0.03670844]), 'ndcg': array([0.02826189])}
EPOCH[351/1000] loss0.009-|Sample:15.28|
EPOCH[352/1000] loss0.009-|Sample:15.26|
EPOCH[353/1000] loss0.009-|Sample:16.50|
EPOCH[354/1000] loss0.009-|Sample:15.47|
EPOCH[355/1000] loss0.009-|Sample:15.42|
EPOCH[356/1000] loss0.009-|Sample:15.22|
EPOCH[357/1000] loss0.009-|Sample:15.56|
EPOCH[358/1000] loss0.009-|Sample:15.68|
EPOCH[359/1000] loss0.009-|Sample:15.87|
EPOCH[360/1000] loss0.009-|Sample:15.29|
[TEST]
{'precision': array([0.01507893]), 'recall': array([0.03680089]), 'ndcg': array([0.02838119])}
EPOCH[361/1000] loss0.009-|Sample:15.03|
EPOCH[362/1000] loss0.009-|Sample:15.11|
EPOCH[363/1000] loss0.009-|Sample:16.06|
EPOCH[364/1000] loss0.009-|Sample:15.92|
EPOCH[365/1000] loss0.009-|Sample:15.32|
EPOCH[366/1000] loss0.009-|Sample:15.65|
EPOCH[367/1000] loss0.009-|Sample:15.76|
EPOCH[368/1000] loss0.009-|Sample:16.12|
EPOCH[369/1000] loss0.009-|Sample:15.31|
EPOCH[370/1000] loss0.009-|Sample:16.09|
[TEST]
{'precision': array([0.01509412]), 'recall': array([0.03680485]), 'ndcg': array([0.02829269])}
EPOCH[371/1000] loss0.009-|Sample:15.59|
EPOCH[372/1000] loss0.009-|Sample:15.12|
EPOCH[373/1000] loss0.009-|Sample:15.89|
EPOCH[374/1000] loss0.009-|Sample:15.73|
EPOCH[375/1000] loss0.009-|Sample:15.48|
EPOCH[376/1000] loss0.009-|Sample:15.81|
EPOCH[377/1000] loss0.009-|Sample:15.48|
EPOCH[378/1000] loss0.009-|Sample:15.68|
EPOCH[379/1000] loss0.009-|Sample:15.25|
EPOCH[380/1000] loss0.009-|Sample:16.34|
[TEST]
{'precision': array([0.01511407]), 'recall': array([0.03686288]), 'ndcg': array([0.02831597])}
EPOCH[381/1000] loss0.009-|Sample:15.06|
EPOCH[382/1000] loss0.009-|Sample:15.37|
EPOCH[383/1000] loss0.009-|Sample:15.90|
EPOCH[384/1000] loss0.009-|Sample:15.40|
EPOCH[385/1000] loss0.009-|Sample:15.31|
EPOCH[386/1000] loss0.009-|Sample:15.62|
EPOCH[387/1000] loss0.009-|Sample:15.12|
EPOCH[388/1000] loss0.009-|Sample:15.61|
EPOCH[389/1000] loss0.009-|Sample:15.96|
EPOCH[390/1000] loss0.009-|Sample:15.12|
[TEST]
{'precision': array([0.01512642]), 'recall': array([0.03688836]), 'ndcg': array([0.02826418])}
EPOCH[391/1000] loss0.009-|Sample:15.42|
EPOCH[392/1000] loss0.009-|Sample:15.65|
EPOCH[393/1000] loss0.009-|Sample:15.72|
EPOCH[394/1000] loss0.009-|Sample:15.64|
EPOCH[395/1000] loss0.009-|Sample:15.59|
EPOCH[396/1000] loss0.009-|Sample:15.79|
EPOCH[397/1000] loss0.009-|Sample:15.25|
EPOCH[398/1000] loss0.009-|Sample:15.57|
EPOCH[399/1000] loss0.009-|Sample:15.89|
EPOCH[400/1000] loss0.009-|Sample:15.07|
[TEST]
{'precision': array([0.01509697]), 'recall': array([0.0369234]), 'ndcg': array([0.0284457])}
EPOCH[401/1000] loss0.009-|Sample:15.95|
EPOCH[402/1000] loss0.009-|Sample:15.78|
EPOCH[403/1000] loss0.009-|Sample:15.36|
EPOCH[404/1000] loss0.009-|Sample:15.61|
EPOCH[405/1000] loss0.009-|Sample:15.31|
EPOCH[406/1000] loss0.009-|Sample:15.78|
EPOCH[407/1000] loss0.009-|Sample:15.62|
EPOCH[408/1000] loss0.009-|Sample:15.22|
EPOCH[409/1000] loss0.009-|Sample:15.39|
EPOCH[410/1000] loss0.009-|Sample:15.67|
[TEST]
{'precision': array([0.01508653]), 'recall': array([0.03682396]), 'ndcg': array([0.02840879])}
EPOCH[411/1000] loss0.009-|Sample:15.48|
EPOCH[412/1000] loss0.009-|Sample:15.15|
EPOCH[413/1000] loss0.009-|Sample:15.75|
EPOCH[414/1000] loss0.009-|Sample:16.09|
EPOCH[415/1000] loss0.009-|Sample:15.20|
EPOCH[416/1000] loss0.009-|Sample:15.51|
EPOCH[417/1000] loss0.009-|Sample:15.57|
EPOCH[418/1000] loss0.009-|Sample:15.67|
EPOCH[419/1000] loss0.009-|Sample:15.51|
EPOCH[420/1000] loss0.009-|Sample:16.11|
[TEST]
{'precision': array([0.01506088]), 'recall': array([0.03673826]), 'ndcg': array([0.02831921])}
EPOCH[421/1000] loss0.009-|Sample:15.32|
EPOCH[422/1000] loss0.009-|Sample:15.47|
EPOCH[423/1000] loss0.009-|Sample:15.25|
EPOCH[424/1000] loss0.009-|Sample:16.34|
EPOCH[425/1000] loss0.009-|Sample:15.36|
EPOCH[426/1000] loss0.009-|Sample:15.42|
EPOCH[427/1000] loss0.009-|Sample:15.47|
EPOCH[428/1000] loss0.009-|Sample:15.42|
EPOCH[429/1000] loss0.009-|Sample:15.76|
EPOCH[430/1000] loss0.009-|Sample:15.43|
[TEST]
{'precision': array([0.01528503]), 'recall': array([0.03730542]), 'ndcg': array([0.02875575])}
EPOCH[431/1000] loss0.009-|Sample:15.47|
EPOCH[432/1000] loss0.009-|Sample:15.61|
EPOCH[433/1000] loss0.009-|Sample:16.37|
EPOCH[434/1000] loss0.009-|Sample:15.51|
EPOCH[435/1000] loss0.009-|Sample:15.90|
EPOCH[436/1000] loss0.009-|Sample:15.86|
EPOCH[437/1000] loss0.009-|Sample:15.68|
EPOCH[438/1000] loss0.009-|Sample:15.29|
EPOCH[439/1000] loss0.009-|Sample:15.25|
EPOCH[440/1000] loss0.009-|Sample:15.82|
[TEST]
{'precision': array([0.01524134]), 'recall': array([0.03718268]), 'ndcg': array([0.02862729])}
EPOCH[441/1000] loss0.009-|Sample:15.64|
EPOCH[442/1000] loss0.009-|Sample:14.76|
EPOCH[443/1000] loss0.009-|Sample:15.70|
EPOCH[444/1000] loss0.009-|Sample:15.70|
EPOCH[445/1000] loss0.009-|Sample:15.70|
EPOCH[446/1000] loss0.009-|Sample:16.20|
EPOCH[447/1000] loss0.009-|Sample:15.81|
EPOCH[448/1000] loss0.009-|Sample:15.53|
EPOCH[449/1000] loss0.009-|Sample:15.22|
EPOCH[450/1000] loss0.009-|Sample:15.76|
[TEST]
{'precision': array([0.01526319]), 'recall': array([0.03738117]), 'ndcg': array([0.02876279])}
EPOCH[451/1000] loss0.009-|Sample:15.36|
EPOCH[452/1000] loss0.009-|Sample:15.31|
EPOCH[453/1000] loss0.009-|Sample:15.73|
EPOCH[454/1000] loss0.009-|Sample:15.45|
EPOCH[455/1000] loss0.009-|Sample:15.40|
EPOCH[456/1000] loss0.009-|Sample:15.50|
EPOCH[457/1000] loss0.009-|Sample:15.54|
EPOCH[458/1000] loss0.009-|Sample:15.36|
EPOCH[459/1000] loss0.009-|Sample:15.48|
EPOCH[460/1000] loss0.009-|Sample:16.28|
[TEST]
{'precision': array([0.01524514]), 'recall': array([0.03727318]), 'ndcg': array([0.02852801])}
EPOCH[461/1000] loss0.009-|Sample:15.34|
EPOCH[462/1000] loss0.009-|Sample:15.34|
EPOCH[463/1000] loss0.009-|Sample:15.84|
EPOCH[464/1000] loss0.009-|Sample:15.78|
EPOCH[465/1000] loss0.009-|Sample:15.32|
EPOCH[466/1000] loss0.009-|Sample:15.65|
EPOCH[467/1000] loss0.009-|Sample:15.72|
EPOCH[468/1000] loss0.009-|Sample:15.48|
EPOCH[469/1000] loss0.009-|Sample:15.93|
EPOCH[470/1000] loss0.009-|Sample:15.48|
[TEST]
{'precision': array([0.0152119]), 'recall': array([0.03728578]), 'ndcg': array([0.0286345])}
EPOCH[471/1000] loss0.009-|Sample:15.57|
EPOCH[472/1000] loss0.009-|Sample:15.36|
EPOCH[473/1000] loss0.009-|Sample:15.82|
EPOCH[474/1000] loss0.009-|Sample:15.00|
EPOCH[475/1000] loss0.009-|Sample:15.48|
EPOCH[476/1000] loss0.009-|Sample:15.45|
EPOCH[477/1000] loss0.009-|Sample:15.87|
EPOCH[478/1000] loss0.009-|Sample:15.25|
EPOCH[479/1000] loss0.009-|Sample:15.03|
EPOCH[480/1000] loss0.009-|Sample:15.43|
[TEST]
{'precision': array([0.01516536]), 'recall': array([0.03704534]), 'ndcg': array([0.02851308])}
EPOCH[481/1000] loss0.009-|Sample:15.47|
EPOCH[482/1000] loss0.009-|Sample:15.70|
EPOCH[483/1000] loss0.009-|Sample:15.28|
EPOCH[484/1000] loss0.009-|Sample:15.45|
EPOCH[485/1000] loss0.009-|Sample:15.50|
EPOCH[486/1000] loss0.009-|Sample:15.50|
EPOCH[487/1000] loss0.009-|Sample:16.56|
EPOCH[488/1000] loss0.009-|Sample:15.68|
EPOCH[489/1000] loss0.009-|Sample:15.92|
EPOCH[490/1000] loss0.009-|Sample:15.48|
[TEST]
{'precision': array([0.01511977]), 'recall': array([0.03703101]), 'ndcg': array([0.02840363])}
EPOCH[491/1000] loss0.009-|Sample:15.61|
EPOCH[492/1000] loss0.009-|Sample:15.50|
EPOCH[493/1000] loss0.009-|Sample:15.70|
EPOCH[494/1000] loss0.009-|Sample:16.14|
EPOCH[495/1000] loss0.009-|Sample:15.90|
EPOCH[496/1000] loss0.009-|Sample:15.87|
EPOCH[497/1000] loss0.009-|Sample:15.65|
EPOCH[498/1000] loss0.009-|Sample:15.50|
EPOCH[499/1000] loss0.009-|Sample:15.36|
EPOCH[500/1000] loss0.009-|Sample:15.36|
[TEST]
{'precision': array([0.01515491]), 'recall': array([0.03705059]), 'ndcg': array([0.02853502])}
EPOCH[501/1000] loss0.009-|Sample:15.56|
EPOCH[502/1000] loss0.009-|Sample:15.68|
EPOCH[503/1000] loss0.009-|Sample:15.51|
EPOCH[504/1000] loss0.009-|Sample:15.45|
EPOCH[505/1000] loss0.009-|Sample:15.70|
EPOCH[506/1000] loss0.009-|Sample:15.42|
EPOCH[507/1000] loss0.009-|Sample:15.09|
EPOCH[508/1000] loss0.009-|Sample:14.75|
EPOCH[509/1000] loss0.009-|Sample:14.89|
EPOCH[510/1000] loss0.009-|Sample:14.00|
[TEST]
{'precision': array([0.01511407]), 'recall': array([0.03687409]), 'ndcg': array([0.02839879])}
EPOCH[511/1000] loss0.009-|Sample:14.70|
EPOCH[512/1000] loss0.009-|Sample:13.84|
EPOCH[513/1000] loss0.009-|Sample:15.01|
EPOCH[514/1000] loss0.009-|Sample:13.90|
EPOCH[515/1000] loss0.009-|Sample:14.48|
EPOCH[516/1000] loss0.009-|Sample:14.70|
EPOCH[517/1000] loss0.009-|Sample:14.53|
EPOCH[518/1000] loss0.009-|Sample:13.75|
EPOCH[519/1000] loss0.009-|Sample:14.59|
EPOCH[520/1000] loss0.009-|Sample:14.70|
[TEST]
{'precision': array([0.01529548]), 'recall': array([0.03728859]), 'ndcg': array([0.02868066])}
EPOCH[521/1000] loss0.009-|Sample:14.39|
EPOCH[522/1000] loss0.009-|Sample:14.51|
EPOCH[523/1000] loss0.009-|Sample:14.23|
EPOCH[524/1000] loss0.009-|Sample:14.23|
EPOCH[525/1000] loss0.009-|Sample:14.89|
EPOCH[526/1000] loss0.009-|Sample:14.53|
EPOCH[527/1000] loss0.009-|Sample:14.64|
EPOCH[528/1000] loss0.009-|Sample:14.75|
EPOCH[529/1000] loss0.009-|Sample:13.98|
EPOCH[530/1000] loss0.009-|Sample:14.32|
[TEST]
{'precision': array([0.0152119]), 'recall': array([0.03711017]), 'ndcg': array([0.02860027])}
EPOCH[531/1000] loss0.009-|Sample:13.87|
EPOCH[532/1000] loss0.009-|Sample:14.61|
EPOCH[533/1000] loss0.009-|Sample:14.62|
EPOCH[534/1000] loss0.009-|Sample:14.61|
EPOCH[535/1000] loss0.009-|Sample:13.84|
EPOCH[536/1000] loss0.009-|Sample:14.81|
EPOCH[537/1000] loss0.009-|Sample:14.54|
EPOCH[538/1000] loss0.009-|Sample:14.57|
EPOCH[539/1000] loss0.009-|Sample:13.89|
EPOCH[540/1000] loss0.009-|Sample:14.67|
[TEST]
{'precision': array([0.01530593]), 'recall': array([0.03752981]), 'ndcg': array([0.02870972])}
EPOCH[541/1000] loss0.009-|Sample:14.76|
EPOCH[542/1000] loss0.009-|Sample:14.25|
EPOCH[543/1000] loss0.009-|Sample:14.12|
EPOCH[544/1000] loss0.009-|Sample:14.68|
EPOCH[545/1000] loss0.009-|Sample:14.57|
EPOCH[546/1000] loss0.009-|Sample:14.39|
EPOCH[547/1000] loss0.009-|Sample:14.22|
EPOCH[548/1000] loss0.009-|Sample:15.01|
EPOCH[549/1000] loss0.009-|Sample:14.56|
EPOCH[550/1000] loss0.009-|Sample:14.18|
[TEST]
{'precision': array([0.01533632]), 'recall': array([0.03747531]), 'ndcg': array([0.02871333])}
EPOCH[551/1000] loss0.009-|Sample:14.47|
EPOCH[552/1000] loss0.009-|Sample:13.97|
EPOCH[553/1000] loss0.009-|Sample:14.82|
EPOCH[554/1000] loss0.009-|Sample:13.67|
EPOCH[555/1000] loss0.009-|Sample:14.48|
EPOCH[556/1000] loss0.009-|Sample:14.72|
EPOCH[557/1000] loss0.009-|Sample:14.53|
EPOCH[558/1000] loss0.009-|Sample:14.00|
EPOCH[559/1000] loss0.009-|Sample:14.78|
EPOCH[560/1000] loss0.009-|Sample:14.57|
[TEST]
{'precision': array([0.01538381]), 'recall': array([0.03756727]), 'ndcg': array([0.02882295])}
EPOCH[561/1000] loss0.009-|Sample:14.61|
EPOCH[562/1000] loss0.009-|Sample:14.50|
EPOCH[563/1000] loss0.009-|Sample:14.31|
EPOCH[564/1000] loss0.009-|Sample:14.48|
EPOCH[565/1000] loss0.009-|Sample:14.76|
EPOCH[566/1000] loss0.009-|Sample:14.65|
EPOCH[567/1000] loss0.009-|Sample:14.54|
EPOCH[568/1000] loss0.009-|Sample:14.57|
EPOCH[569/1000] loss0.009-|Sample:14.48|
EPOCH[570/1000] loss0.009-|Sample:14.26|
[TEST]
{'precision': array([0.01535342]), 'recall': array([0.03759941]), 'ndcg': array([0.0288019])}
EPOCH[571/1000] loss0.009-|Sample:13.84|
EPOCH[572/1000] loss0.009-|Sample:14.32|
EPOCH[573/1000] loss0.009-|Sample:14.70|
EPOCH[574/1000] loss0.009-|Sample:14.61|
EPOCH[575/1000] loss0.009-|Sample:14.28|
EPOCH[576/1000] loss0.009-|Sample:14.32|
EPOCH[577/1000] loss0.009-|Sample:14.56|
EPOCH[578/1000] loss0.009-|Sample:14.87|
EPOCH[579/1000] loss0.009-|Sample:13.90|
EPOCH[580/1000] loss0.009-|Sample:14.68|
[TEST]
{'precision': array([0.01526984]), 'recall': array([0.03741501]), 'ndcg': array([0.02872887])}
EPOCH[581/1000] loss0.009-|Sample:14.53|
EPOCH[582/1000] loss0.009-|Sample:14.40|
EPOCH[583/1000] loss0.009-|Sample:13.82|
EPOCH[584/1000] loss0.009-|Sample:14.42|
EPOCH[585/1000] loss0.009-|Sample:14.78|
EPOCH[586/1000] loss0.009-|Sample:14.57|
EPOCH[587/1000] loss0.009-|Sample:13.87|
EPOCH[588/1000] loss0.009-|Sample:14.67|
EPOCH[589/1000] loss0.009-|Sample:14.75|
EPOCH[590/1000] loss0.009-|Sample:14.17|
[TEST]
{'precision': array([0.01531163]), 'recall': array([0.03757372]), 'ndcg': array([0.02877774])}
EPOCH[591/1000] loss0.009-|Sample:14.72|
EPOCH[592/1000] loss0.009-|Sample:13.75|
EPOCH[593/1000] loss0.009-|Sample:14.68|
EPOCH[594/1000] loss0.009-|Sample:14.18|
EPOCH[595/1000] loss0.009-|Sample:14.32|
EPOCH[596/1000] loss0.009-|Sample:14.59|
EPOCH[597/1000] loss0.009-|Sample:14.62|
EPOCH[598/1000] loss0.009-|Sample:14.06|
EPOCH[599/1000] loss0.009-|Sample:14.43|
EPOCH[600/1000] loss0.009-|Sample:14.48|
[TEST]
{'precision': array([0.01540471]), 'recall': array([0.03784089]), 'ndcg': array([0.0290142])}
EPOCH[601/1000] loss0.009-|Sample:14.42|
EPOCH[602/1000] loss0.009-|Sample:14.64|
EPOCH[603/1000] loss0.009-|Sample:14.28|
EPOCH[604/1000] loss0.009-|Sample:14.09|
EPOCH[605/1000] loss0.009-|Sample:14.43|
EPOCH[606/1000] loss0.009-|Sample:14.73|
EPOCH[607/1000] loss0.009-|Sample:14.37|
EPOCH[608/1000] loss0.009-|Sample:14.64|
EPOCH[609/1000] loss0.009-|Sample:14.61|
EPOCH[610/1000] loss0.009-|Sample:14.00|
[TEST]
{'precision': array([0.01530308]), 'recall': array([0.0375672]), 'ndcg': array([0.0287701])}
EPOCH[611/1000] loss0.009-|Sample:14.25|
EPOCH[612/1000] loss0.009-|Sample:14.03|
EPOCH[613/1000] loss0.009-|Sample:14.70|
EPOCH[614/1000] loss0.009-|Sample:14.76|
EPOCH[615/1000] loss0.009-|Sample:14.09|
EPOCH[616/1000] loss0.009-|Sample:14.25|
EPOCH[617/1000] loss0.009-|Sample:14.65|
EPOCH[618/1000] loss0.009-|Sample:14.67|
EPOCH[619/1000] loss0.009-|Sample:14.09|
EPOCH[620/1000] loss0.009-|Sample:14.98|
[TEST]
{'precision': array([0.01523659]), 'recall': array([0.03733785]), 'ndcg': array([0.0287489])}
EPOCH[621/1000] loss0.009-|Sample:14.39|
EPOCH[622/1000] loss0.009-|Sample:14.57|
EPOCH[623/1000] loss0.009-|Sample:14.03|
EPOCH[624/1000] loss0.009-|Sample:14.59|
EPOCH[625/1000] loss0.009-|Sample:14.76|
EPOCH[626/1000] loss0.009-|Sample:14.56|
EPOCH[627/1000] loss0.009-|Sample:13.90|
EPOCH[628/1000] loss0.009-|Sample:14.78|
EPOCH[629/1000] loss0.009-|Sample:14.57|
EPOCH[630/1000] loss0.009-|Sample:14.56|
[TEST]
{'precision': array([0.015229]), 'recall': array([0.03723996]), 'ndcg': array([0.02852339])}
EPOCH[631/1000] loss0.009-|Sample:14.61|
EPOCH[632/1000] loss0.009-|Sample:13.98|
EPOCH[633/1000] loss0.009-|Sample:14.70|
EPOCH[634/1000] loss0.009-|Sample:14.18|
EPOCH[635/1000] loss0.009-|Sample:14.37|
EPOCH[636/1000] loss0.009-|Sample:14.65|
EPOCH[637/1000] loss0.009-|Sample:14.47|
EPOCH[638/1000] loss0.009-|Sample:14.17|
EPOCH[639/1000] loss0.009-|Sample:14.31|
EPOCH[640/1000] loss0.009-|Sample:14.37|
[TEST]
{'precision': array([0.01535152]), 'recall': array([0.03756294]), 'ndcg': array([0.02883111])}
EPOCH[641/1000] loss0.009-|Sample:14.57|
EPOCH[642/1000] loss0.009-|Sample:14.57|
EPOCH[643/1000] loss0.009-|Sample:14.45|
EPOCH[644/1000] loss0.009-|Sample:14.18|
EPOCH[645/1000] loss0.009-|Sample:14.73|
EPOCH[646/1000] loss0.009-|Sample:14.70|
EPOCH[647/1000] loss0.009-|Sample:14.57|
EPOCH[648/1000] loss0.009-|Sample:14.78|
EPOCH[649/1000] loss0.009-|Sample:14.68|
EPOCH[650/1000] loss0.009-|Sample:13.64|
[TEST]
{'precision': array([0.01525844]), 'recall': array([0.03731307]), 'ndcg': array([0.02882698])}
EPOCH[651/1000] loss0.009-|Sample:14.43|
EPOCH[652/1000] loss0.009-|Sample:14.01|
EPOCH[653/1000] loss0.009-|Sample:14.70|
EPOCH[654/1000] loss0.009-|Sample:14.53|
EPOCH[655/1000] loss0.009-|Sample:14.25|
EPOCH[656/1000] loss0.009-|Sample:14.09|
EPOCH[657/1000] loss0.009-|Sample:14.64|
EPOCH[658/1000] loss0.009-|Sample:14.54|
EPOCH[659/1000] loss0.009-|Sample:14.34|
EPOCH[660/1000] loss0.009-|Sample:14.57|
[TEST]
{'precision': array([0.01543795]), 'recall': array([0.0377514]), 'ndcg': array([0.02881897])}
EPOCH[661/1000] loss0.009-|Sample:14.54|
EPOCH[662/1000] loss0.009-|Sample:14.53|
EPOCH[663/1000] loss0.009-|Sample:14.04|
EPOCH[664/1000] loss0.009-|Sample:14.57|
EPOCH[665/1000] loss0.009-|Sample:14.51|
EPOCH[666/1000] loss0.009-|Sample:14.62|
EPOCH[667/1000] loss0.009-|Sample:14.06|
EPOCH[668/1000] loss0.009-|Sample:14.43|
EPOCH[669/1000] loss0.009-|Sample:14.72|
EPOCH[670/1000] loss0.009-|Sample:14.72|
[TEST]
{'precision': array([0.0154256]), 'recall': array([0.03768243]), 'ndcg': array([0.02882671])}
EPOCH[671/1000] loss0.009-|Sample:14.65|
EPOCH[672/1000] loss0.009-|Sample:14.20|
EPOCH[673/1000] loss0.009-|Sample:14.54|
EPOCH[674/1000] loss0.009-|Sample:14.20|
EPOCH[675/1000] loss0.009-|Sample:14.37|
EPOCH[676/1000] loss0.009-|Sample:14.47|
EPOCH[677/1000] loss0.009-|Sample:14.64|
EPOCH[678/1000] loss0.009-|Sample:14.67|
EPOCH[679/1000] loss0.009-|Sample:13.97|
EPOCH[680/1000] loss0.009-|Sample:14.65|
[TEST]
{'precision': array([0.01526034]), 'recall': array([0.03742425]), 'ndcg': array([0.02874848])}
EPOCH[681/1000] loss0.009-|Sample:14.48|
EPOCH[682/1000] loss0.009-|Sample:14.67|
EPOCH[683/1000] loss0.009-|Sample:14.67|
EPOCH[684/1000] loss0.009-|Sample:13.82|
EPOCH[685/1000] loss0.009-|Sample:14.65|
EPOCH[686/1000] loss0.009-|Sample:14.72|
EPOCH[687/1000] loss0.009-|Sample:13.98|
EPOCH[688/1000] loss0.009-|Sample:14.62|
EPOCH[689/1000] loss0.009-|Sample:14.72|
EPOCH[690/1000] loss0.009-|Sample:13.86|
[TEST]
{'precision': array([0.01538381]), 'recall': array([0.03763264]), 'ndcg': array([0.02893096])}
EPOCH[691/1000] loss0.009-|Sample:14.57|
EPOCH[692/1000] loss0.009-|Sample:13.82|
EPOCH[693/1000] loss0.009-|Sample:14.68|
EPOCH[694/1000] loss0.009-|Sample:14.65|
EPOCH[695/1000] loss0.009-|Sample:14.22|
EPOCH[696/1000] loss0.009-|Sample:14.22|
EPOCH[697/1000] loss0.009-|Sample:14.56|
EPOCH[698/1000] loss0.009-|Sample:14.64|
EPOCH[699/1000] loss0.009-|Sample:14.50|
EPOCH[700/1000] loss0.009-|Sample:14.51|
[TEST]
{'precision': array([0.0154351]), 'recall': array([0.03768069]), 'ndcg': array([0.0291067])}
EPOCH[701/1000] loss0.009-|Sample:14.65|
EPOCH[702/1000] loss0.009-|Sample:14.61|
EPOCH[703/1000] loss0.009-|Sample:14.11|
EPOCH[704/1000] loss0.009-|Sample:14.34|
EPOCH[705/1000] loss0.009-|Sample:14.54|
EPOCH[706/1000] loss0.009-|Sample:14.65|
EPOCH[707/1000] loss0.009-|Sample:14.00|
EPOCH[708/1000] loss0.009-|Sample:14.40|
EPOCH[709/1000] loss0.009-|Sample:14.73|
EPOCH[710/1000] loss0.009-|Sample:14.53|
[TEST]
{'precision': array([0.01537716]), 'recall': array([0.03759077]), 'ndcg': array([0.02888739])}
EPOCH[711/1000] loss0.009-|Sample:14.78|
EPOCH[712/1000] loss0.009-|Sample:14.01|
EPOCH[713/1000] loss0.009-|Sample:14.59|
EPOCH[714/1000] loss0.009-|Sample:14.73|
EPOCH[715/1000] loss0.009-|Sample:14.03|
EPOCH[716/1000] loss0.009-|Sample:14.67|
EPOCH[717/1000] loss0.009-|Sample:14.67|
EPOCH[718/1000] loss0.009-|Sample:14.47|
EPOCH[719/1000] loss0.009-|Sample:14.03|
EPOCH[720/1000] loss0.009-|Sample:14.93|
[TEST]
{'precision': array([0.01530688]), 'recall': array([0.03730154]), 'ndcg': array([0.02870693])}
EPOCH[721/1000] loss0.009-|Sample:14.37|
EPOCH[722/1000] loss0.009-|Sample:14.90|
EPOCH[723/1000] loss0.009-|Sample:14.86|
EPOCH[724/1000] loss0.009-|Sample:13.92|
EPOCH[725/1000] loss0.009-|Sample:14.61|
EPOCH[726/1000] loss0.009-|Sample:14.64|
EPOCH[727/1000] loss0.009-|Sample:13.98|
EPOCH[728/1000] loss0.009-|Sample:14.79|
EPOCH[729/1000] loss0.009-|Sample:14.57|
EPOCH[730/1000] loss0.009-|Sample:14.36|
[TEST]
{'precision': array([0.01525939]), 'recall': array([0.03724977]), 'ndcg': array([0.02853344])}
EPOCH[731/1000] loss0.009-|Sample:14.45|
EPOCH[732/1000] loss0.009-|Sample:13.97|
EPOCH[733/1000] loss0.009-|Sample:14.81|
EPOCH[734/1000] loss0.009-|Sample:14.50|
EPOCH[735/1000] loss0.009-|Sample:14.57|
EPOCH[736/1000] loss0.009-|Sample:14.04|
EPOCH[737/1000] loss0.009-|Sample:14.59|
EPOCH[738/1000] loss0.009-|Sample:14.73|
EPOCH[739/1000] loss0.009-|Sample:14.67|
EPOCH[740/1000] loss0.009-|Sample:14.47|
[TEST]
{'precision': array([0.01536672]), 'recall': array([0.03757268]), 'ndcg': array([0.02882343])}
EPOCH[741/1000] loss0.009-|Sample:14.62|
EPOCH[742/1000] loss0.009-|Sample:14.43|
EPOCH[743/1000] loss0.009-|Sample:14.31|
EPOCH[744/1000] loss0.009-|Sample:14.34|
EPOCH[745/1000] loss0.009-|Sample:14.81|
EPOCH[746/1000] loss0.009-|Sample:14.65|
EPOCH[747/1000] loss0.009-|Sample:14.28|
EPOCH[748/1000] loss0.009-|Sample:14.23|
EPOCH[749/1000] loss0.009-|Sample:14.89|
EPOCH[750/1000] loss0.009-|Sample:14.54|
[TEST]
{'precision': array([0.01540091]), 'recall': array([0.03776024]), 'ndcg': array([0.0288512])}
EPOCH[751/1000] loss0.009-|Sample:14.40|
EPOCH[752/1000] loss0.009-|Sample:14.31|
EPOCH[753/1000] loss0.009-|Sample:14.75|
EPOCH[754/1000] loss0.009-|Sample:14.89|
EPOCH[755/1000] loss0.009-|Sample:13.93|
EPOCH[756/1000] loss0.009-|Sample:14.76|
EPOCH[757/1000] loss0.009-|Sample:14.47|
EPOCH[758/1000] loss0.009-|Sample:14.61|
EPOCH[759/1000] loss0.009-|Sample:13.98|
EPOCH[760/1000] loss0.009-|Sample:14.26|
[TEST]
{'precision': array([0.01537241]), 'recall': array([0.03767796]), 'ndcg': array([0.02884173])}
EPOCH[761/1000] loss0.009-|Sample:14.47|
EPOCH[762/1000] loss0.009-|Sample:14.51|
EPOCH[763/1000] loss0.009-|Sample:14.67|
EPOCH[764/1000] loss0.009-|Sample:14.43|
EPOCH[765/1000] loss0.009-|Sample:14.18|
EPOCH[766/1000] loss0.009-|Sample:14.79|
EPOCH[767/1000] loss0.009-|Sample:14.00|
EPOCH[768/1000] loss0.009-|Sample:14.53|
EPOCH[769/1000] loss0.009-|Sample:14.57|
EPOCH[770/1000] loss0.009-|Sample:14.72|
[TEST]
{'precision': array([0.01542655]), 'recall': array([0.03776801]), 'ndcg': array([0.02895316])}
EPOCH[771/1000] loss0.009-|Sample:14.54|
EPOCH[772/1000] loss0.009-|Sample:13.95|
EPOCH[773/1000] loss0.009-|Sample:14.62|
EPOCH[774/1000] loss0.009-|Sample:14.62|
EPOCH[775/1000] loss0.009-|Sample:15.07|
EPOCH[776/1000] loss0.009-|Sample:18.45|
EPOCH[777/1000] loss0.009-|Sample:15.32|
EPOCH[778/1000] loss0.009-|Sample:15.37|
EPOCH[779/1000] loss0.009-|Sample:15.50|
EPOCH[780/1000] loss0.009-|Sample:15.78|
[TEST]
{'precision': array([0.01538856]), 'recall': array([0.03782478]), 'ndcg': array([0.02891169])}
EPOCH[781/1000] loss0.009-|Sample:15.01|
EPOCH[782/1000] loss0.009-|Sample:15.14|
EPOCH[783/1000] loss0.009-|Sample:15.95|
EPOCH[784/1000] loss0.009-|Sample:15.65|
EPOCH[785/1000] loss0.009-|Sample:15.36|
EPOCH[786/1000] loss0.009-|Sample:15.81|
EPOCH[787/1000] loss0.009-|Sample:14.92|
EPOCH[788/1000] loss0.009-|Sample:15.11|
EPOCH[789/1000] loss0.009-|Sample:15.57|
EPOCH[790/1000] loss0.009-|Sample:15.84|
[TEST]
{'precision': array([0.01536862]), 'recall': array([0.03769722]), 'ndcg': array([0.02879454])}
EPOCH[791/1000] loss0.009-|Sample:15.28|
EPOCH[792/1000] loss0.009-|Sample:15.04|
EPOCH[793/1000] loss0.009-|Sample:15.18|
EPOCH[794/1000] loss0.009-|Sample:15.78|
EPOCH[795/1000] loss0.009-|Sample:15.25|
EPOCH[796/1000] loss0.009-|Sample:15.29|
EPOCH[797/1000] loss0.009-|Sample:15.75|
EPOCH[798/1000] loss0.009-|Sample:15.70|
EPOCH[799/1000] loss0.009-|Sample:15.22|
EPOCH[800/1000] loss0.009-|Sample:15.86|
[TEST]
{'precision': array([0.01536007]), 'recall': array([0.03769444]), 'ndcg': array([0.02904939])}
EPOCH[801/1000] loss0.009-|Sample:15.20|
EPOCH[802/1000] loss0.009-|Sample:15.31|
EPOCH[803/1000] loss0.009-|Sample:15.25|
EPOCH[804/1000] loss0.009-|Sample:15.47|
EPOCH[805/1000] loss0.009-|Sample:15.23|
EPOCH[806/1000] loss0.009-|Sample:15.12|
EPOCH[807/1000] loss0.009-|Sample:15.20|
EPOCH[808/1000] loss0.009-|Sample:15.34|
EPOCH[809/1000] loss0.009-|Sample:15.28|
EPOCH[810/1000] loss0.009-|Sample:15.51|
[TEST]
{'precision': array([0.01538666]), 'recall': array([0.03770468]), 'ndcg': array([0.02913428])}
EPOCH[811/1000] loss0.009-|Sample:15.73|
EPOCH[812/1000] loss0.009-|Sample:15.00|
EPOCH[813/1000] loss0.009-|Sample:15.37|
EPOCH[814/1000] loss0.009-|Sample:15.59|
EPOCH[815/1000] loss0.009-|Sample:15.43|
EPOCH[816/1000] loss0.009-|Sample:15.36|
EPOCH[817/1000] loss0.009-|Sample:15.51|
EPOCH[818/1000] loss0.009-|Sample:15.04|
EPOCH[819/1000] loss0.009-|Sample:15.59|
EPOCH[820/1000] loss0.009-|Sample:15.75|
[TEST]
{'precision': array([0.01535722]), 'recall': array([0.03762131]), 'ndcg': array([0.02908782])}
EPOCH[821/1000] loss0.009-|Sample:15.32|
EPOCH[822/1000] loss0.009-|Sample:15.28|
EPOCH[823/1000] loss0.009-|Sample:15.12|
EPOCH[824/1000] loss0.009-|Sample:15.17|
EPOCH[825/1000] loss0.009-|Sample:15.36|
EPOCH[826/1000] loss0.009-|Sample:15.48|
EPOCH[827/1000] loss0.009-|Sample:18.18|
EPOCH[828/1000] loss0.009-|Sample:18.06|
EPOCH[829/1000] loss0.009-|Sample:17.89|
EPOCH[830/1000] loss0.009-|Sample:17.20|
[TEST]
{'precision': array([0.0154503]), 'recall': array([0.0377623]), 'ndcg': array([0.0291492])}
EPOCH[831/1000] loss0.009-|Sample:16.64|
EPOCH[832/1000] loss0.009-|Sample:18.92|
EPOCH[833/1000] loss0.009-|Sample:17.15|
EPOCH[834/1000] loss0.009-|Sample:18.26|
EPOCH[835/1000] loss0.009-|Sample:18.43|
EPOCH[836/1000] loss0.009-|Sample:18.39|
EPOCH[837/1000] loss0.009-|Sample:17.37|
EPOCH[838/1000] loss0.009-|Sample:18.67|
EPOCH[839/1000] loss0.009-|Sample:17.32|
EPOCH[840/1000] loss0.009-|Sample:17.03|
[TEST]
{'precision': array([0.01546549]), 'recall': array([0.03782302]), 'ndcg': array([0.02918167])}
EPOCH[841/1000] loss0.009-|Sample:17.53|
EPOCH[842/1000] loss0.009-|Sample:17.46|
EPOCH[843/1000] loss0.009-|Sample:17.06|
EPOCH[844/1000] loss0.009-|Sample:17.12|
EPOCH[845/1000] loss0.009-|Sample:17.45|
EPOCH[846/1000] loss0.009-|Sample:17.67|
EPOCH[847/1000] loss0.009-|Sample:18.23|
EPOCH[848/1000] loss0.009-|Sample:17.18|
EPOCH[849/1000] loss0.009-|Sample:18.34|
EPOCH[850/1000] loss0.009-|Sample:17.42|
[TEST]
{'precision': array([0.01531258]), 'recall': array([0.0374978]), 'ndcg': array([0.02889525])}
EPOCH[851/1000] loss0.009-|Sample:16.98|
EPOCH[852/1000] loss0.009-|Sample:17.25|
EPOCH[853/1000] loss0.009-|Sample:18.46|
EPOCH[854/1000] loss0.009-|Sample:17.57|
EPOCH[855/1000] loss0.009-|Sample:17.11|
EPOCH[856/1000] loss0.009-|Sample:17.73|
EPOCH[857/1000] loss0.009-|Sample:17.43|
EPOCH[858/1000] loss0.009-|Sample:17.68|
EPOCH[859/1000] loss0.009-|Sample:17.54|
EPOCH[860/1000] loss0.009-|Sample:19.50|
[TEST]
{'precision': array([0.01535627]), 'recall': array([0.03757242]), 'ndcg': array([0.02905935])}
EPOCH[861/1000] loss0.009-|Sample:18.67|
EPOCH[862/1000] loss0.009-|Sample:18.40|
EPOCH[863/1000] loss0.009-|Sample:17.17|
EPOCH[864/1000] loss0.009-|Sample:18.98|
EPOCH[865/1000] loss0.009-|Sample:17.31|
EPOCH[866/1000] loss0.009-|Sample:17.82|
EPOCH[867/1000] loss0.009-|Sample:18.36|
EPOCH[868/1000] loss0.009-|Sample:17.43|
EPOCH[869/1000] loss0.009-|Sample:18.78|
EPOCH[870/1000] loss0.009-|Sample:17.50|
[TEST]
{'precision': array([0.01533822]), 'recall': array([0.03747635]), 'ndcg': array([0.02900043])}
EPOCH[871/1000] loss0.009-|Sample:17.90|
EPOCH[872/1000] loss0.009-|Sample:18.48|
EPOCH[873/1000] loss0.009-|Sample:17.40|
EPOCH[874/1000] loss0.009-|Sample:17.17|
EPOCH[875/1000] loss0.009-|Sample:18.68|
EPOCH[876/1000] loss0.009-|Sample:17.15|
EPOCH[877/1000] loss0.009-|Sample:17.26|
EPOCH[878/1000] loss0.009-|Sample:18.75|
EPOCH[879/1000] loss0.009-|Sample:17.51|
EPOCH[880/1000] loss0.009-|Sample:17.32|
[TEST]
{'precision': array([0.01535437]), 'recall': array([0.03756355]), 'ndcg': array([0.02899379])}
EPOCH[881/1000] loss0.009-|Sample:17.40|
EPOCH[882/1000] loss0.009-|Sample:19.03|
EPOCH[883/1000] loss0.009-|Sample:17.11|
EPOCH[884/1000] loss0.009-|Sample:17.06|
EPOCH[885/1000] loss0.009-|Sample:19.93|
EPOCH[886/1000] loss0.009-|Sample:17.39|
EPOCH[887/1000] loss0.009-|Sample:17.23|
EPOCH[888/1000] loss0.009-|Sample:17.70|
EPOCH[889/1000] loss0.009-|Sample:17.95|
EPOCH[890/1000] loss0.009-|Sample:16.96|
[TEST]
{'precision': array([0.01541041]), 'recall': array([0.03776877]), 'ndcg': array([0.02902356])}
EPOCH[891/1000] loss0.009-|Sample:17.03|
EPOCH[892/1000] loss0.009-|Sample:18.50|
EPOCH[893/1000] loss0.009-|Sample:17.70|
EPOCH[894/1000] loss0.009-|Sample:17.26|
EPOCH[895/1000] loss0.009-|Sample:17.73|
EPOCH[896/1000] loss0.009-|Sample:17.71|
EPOCH[897/1000] loss0.009-|Sample:17.45|
EPOCH[898/1000] loss0.009-|Sample:17.01|
EPOCH[899/1000] loss0.009-|Sample:19.92|
EPOCH[900/1000] loss0.009-|Sample:16.75|
[TEST]
{'precision': array([0.01543415]), 'recall': array([0.03790268]), 'ndcg': array([0.02908061])}
EPOCH[901/1000] loss0.009-|Sample:17.20|
EPOCH[902/1000] loss0.009-|Sample:16.79|
EPOCH[903/1000] loss0.009-|Sample:16.71|
EPOCH[904/1000] loss0.009-|Sample:17.92|
EPOCH[905/1000] loss0.009-|Sample:17.07|
EPOCH[906/1000] loss0.009-|Sample:17.26|
EPOCH[907/1000] loss0.009-|Sample:16.81|
EPOCH[908/1000] loss0.009-|Sample:19.04|
EPOCH[909/1000] loss0.009-|Sample:16.68|
EPOCH[910/1000] loss0.009-|Sample:16.90|
[TEST]
{'precision': array([0.0154256]), 'recall': array([0.03780752]), 'ndcg': array([0.02904554])}
EPOCH[911/1000] loss0.009-|Sample:17.17|
EPOCH[912/1000] loss0.009-|Sample:19.34|
EPOCH[913/1000] loss0.009-|Sample:17.76|
EPOCH[914/1000] loss0.009-|Sample:18.03|
EPOCH[915/1000] loss0.009-|Sample:18.36|
EPOCH[916/1000] loss0.009-|Sample:17.95|
EPOCH[917/1000] loss0.009-|Sample:17.53|
EPOCH[918/1000] loss0.009-|Sample:17.04|
EPOCH[919/1000] loss0.009-|Sample:19.37|
EPOCH[920/1000] loss0.009-|Sample:17.11|
[TEST]
{'precision': array([0.0154522]), 'recall': array([0.03788857]), 'ndcg': array([0.0291922])}
EPOCH[921/1000] loss0.009-|Sample:17.70|
EPOCH[922/1000] loss0.009-|Sample:18.20|
EPOCH[923/1000] loss0.009-|Sample:19.40|
EPOCH[924/1000] loss0.009-|Sample:18.06|
EPOCH[925/1000] loss0.009-|Sample:17.82|
EPOCH[926/1000] loss0.009-|Sample:16.95|
EPOCH[927/1000] loss0.009-|Sample:17.36|
EPOCH[928/1000] loss0.009-|Sample:16.96|
EPOCH[929/1000] loss0.009-|Sample:15.09|
EPOCH[930/1000] loss0.009-|Sample:15.65|
[TEST]
{'precision': array([0.01548354]), 'recall': array([0.03797192]), 'ndcg': array([0.02911819])}
EPOCH[931/1000] loss0.009-|Sample:16.01|
EPOCH[932/1000] loss0.009-|Sample:15.22|
EPOCH[933/1000] loss0.009-|Sample:15.84|
EPOCH[934/1000] loss0.009-|Sample:15.48|
EPOCH[935/1000] loss0.009-|Sample:15.36|
EPOCH[936/1000] loss0.009-|Sample:15.23|
EPOCH[937/1000] loss0.009-|Sample:15.40|
EPOCH[938/1000] loss0.009-|Sample:15.57|
EPOCH[939/1000] loss0.009-|Sample:15.31|
EPOCH[940/1000] loss0.009-|Sample:15.25|
[TEST]
{'precision': array([0.01553768]), 'recall': array([0.03812134]), 'ndcg': array([0.02926497])}
EPOCH[941/1000] loss0.009-|Sample:15.28|
EPOCH[942/1000] loss0.009-|Sample:15.18|
EPOCH[943/1000] loss0.009-|Sample:15.34|
EPOCH[944/1000] loss0.009-|Sample:15.22|
EPOCH[945/1000] loss0.009-|Sample:15.56|
EPOCH[946/1000] loss0.009-|Sample:15.28|
EPOCH[947/1000] loss0.009-|Sample:15.37|
EPOCH[948/1000] loss0.009-|Sample:15.45|
EPOCH[949/1000] loss0.009-|Sample:15.37|
EPOCH[950/1000] loss0.009-|Sample:15.14|
[TEST]
{'precision': array([0.01538001]), 'recall': array([0.0376129]), 'ndcg': array([0.02905414])}
EPOCH[951/1000] loss0.009-|Sample:15.29|
EPOCH[952/1000] loss0.009-|Sample:15.81|
EPOCH[953/1000] loss0.009-|Sample:15.34|
EPOCH[954/1000] loss0.009-|Sample:15.26|
EPOCH[955/1000] loss0.009-|Sample:15.48|
EPOCH[956/1000] loss0.009-|Sample:15.48|
EPOCH[957/1000] loss0.009-|Sample:15.42|
EPOCH[958/1000] loss0.009-|Sample:15.26|
EPOCH[959/1000] loss0.009-|Sample:15.90|
EPOCH[960/1000] loss0.009-|Sample:15.36|
[TEST]
{'precision': array([0.01546929]), 'recall': array([0.03792998]), 'ndcg': array([0.02924513])}
EPOCH[961/1000] loss0.009-|Sample:15.39|
EPOCH[962/1000] loss0.009-|Sample:15.62|
EPOCH[963/1000] loss0.009-|Sample:15.50|
EPOCH[964/1000] loss0.009-|Sample:15.64|
EPOCH[965/1000] loss0.009-|Sample:15.03|
EPOCH[966/1000] loss0.009-|Sample:15.47|
EPOCH[967/1000] loss0.009-|Sample:15.20|
EPOCH[968/1000] loss0.009-|Sample:15.20|
EPOCH[969/1000] loss0.009-|Sample:15.36|
EPOCH[970/1000] loss0.009-|Sample:15.40|
[TEST]
{'precision': array([0.01539616]), 'recall': array([0.03770773]), 'ndcg': array([0.02911268])}
EPOCH[971/1000] loss0.009-|Sample:14.97|
EPOCH[972/1000] loss0.009-|Sample:15.12|
EPOCH[973/1000] loss0.009-|Sample:15.57|
EPOCH[974/1000] loss0.009-|Sample:15.23|
EPOCH[975/1000] loss0.009-|Sample:15.29|
EPOCH[976/1000] loss0.009-|Sample:15.37|
EPOCH[977/1000] loss0.009-|Sample:15.31|
EPOCH[978/1000] loss0.009-|Sample:15.07|
EPOCH[979/1000] loss0.009-|Sample:15.18|
EPOCH[980/1000] loss0.009-|Sample:15.86|
[TEST]
{'precision': array([0.01549114]), 'recall': array([0.03803832]), 'ndcg': array([0.02917072])}
EPOCH[981/1000] loss0.009-|Sample:15.59|
EPOCH[982/1000] loss0.009-|Sample:15.26|
EPOCH[983/1000] loss0.009-|Sample:15.12|
EPOCH[984/1000] loss0.009-|Sample:15.15|
EPOCH[985/1000] loss0.009-|Sample:15.25|
EPOCH[986/1000] loss0.009-|Sample:15.62|
EPOCH[987/1000] loss0.009-|Sample:15.70|
EPOCH[988/1000] loss0.009-|Sample:15.25|
EPOCH[989/1000] loss0.009-|Sample:15.50|
EPOCH[990/1000] loss0.009-|Sample:15.12|
[TEST]
{'precision': array([0.01547214]), 'recall': array([0.03782074]), 'ndcg': array([0.02904855])}
EPOCH[991/1000] loss0.009-|Sample:15.50|
EPOCH[992/1000] loss0.009-|Sample:15.34|
EPOCH[993/1000] loss0.009-|Sample:15.34|
EPOCH[994/1000] loss0.009-|Sample:15.26|
EPOCH[995/1000] loss0.009-|Sample:15.28|
EPOCH[996/1000] loss0.009-|Sample:15.25|
EPOCH[997/1000] loss0.009-|Sample:15.36|
EPOCH[998/1000] loss0.009-|Sample:15.26|
EPOCH[999/1000] loss0.009-|Sample:15.29|
EPOCH[1000/1000] loss0.009-|Sample:15.11|

Process finished with exit code 0


model:mf layer:1
D:\ProgramFiles\Anaconda3\envs\image_caption_python36\python.exe D:/workspace/LightGcn/LightGCN-PyTorch-master/code/main.py
Cpp extension not loaded
>>SEED: 2020
loading [../data/amazon-book]
2380730 interactions for training
603382 interactions for testing
amazon-book Sparsity : 0.0006188476640083725
amazon-book is ready to go
===========config================
{'A_n_fold': 100,
 'A_split': False,
 'bigdata': False,
 'bpr_batch_size': 2048,
 'decay': 0.0001,
 'dropout': 0,
 'keep_prob': 0.6,
 'latent_dim_rec': 64,
 'lightGCN_n_layers': 1,
 'lr': 0.001,
 'multicore': 0,
 'pretrain': 0,
 'test_u_batch_size': 100}
cores for test: 6
comment: lgn
tensorboard: 1
LOAD: 0
Weight path: ./checkpoints
Test Topks: [20]
using bpr loss
===========end===================
using Normal distribution N(0,1) initialization for PureMF
load and save to /home/qhc/下载/LightGCN-PyTorch-master\code\checkpoints\mf-amazon-book-64.pth.tar
[TEST]
{'precision': array([0.00018521]), 'recall': array([0.0003439]), 'ndcg': array([0.00027584])}
EPOCH[1/1000] loss4.358-|Sample:14.12|
EPOCH[2/1000] loss3.931-|Sample:15.07|
EPOCH[3/1000] loss3.555-|Sample:15.03|
EPOCH[4/1000] loss3.207-|Sample:15.40|
EPOCH[5/1000] loss2.908-|Sample:15.23|
EPOCH[6/1000] loss2.642-|Sample:15.04|
EPOCH[7/1000] loss2.406-|Sample:15.76|
EPOCH[8/1000] loss2.185-|Sample:15.01|
EPOCH[9/1000] loss2.000-|Sample:15.18|
EPOCH[10/1000] loss1.827-|Sample:15.39|
[TEST]
{'precision': array([0.00010828]), 'recall': array([0.00022261]), 'ndcg': array([0.0001609])}
EPOCH[11/1000] loss1.678-|Sample:14.92|
EPOCH[12/1000] loss1.546-|Sample:15.22|
EPOCH[13/1000] loss1.416-|Sample:15.98|
EPOCH[14/1000] loss1.304-|Sample:15.31|
EPOCH[15/1000] loss1.203-|Sample:15.31|
EPOCH[16/1000] loss1.113-|Sample:14.98|
EPOCH[17/1000] loss1.029-|Sample:14.76|
EPOCH[18/1000] loss0.949-|Sample:15.43|
EPOCH[19/1000] loss0.876-|Sample:15.00|
EPOCH[20/1000] loss0.813-|Sample:14.73|
[TEST]
{'precision': array([0.00017096]), 'recall': array([0.00033474]), 'ndcg': array([0.00027928])}
EPOCH[21/1000] loss0.753-|Sample:15.34|
EPOCH[22/1000] loss0.699-|Sample:16.09|
EPOCH[23/1000] loss0.648-|Sample:15.48|
EPOCH[24/1000] loss0.599-|Sample:15.07|
EPOCH[25/1000] loss0.560-|Sample:16.42|
EPOCH[26/1000] loss0.521-|Sample:17.70|
EPOCH[27/1000] loss0.484-|Sample:16.78|
EPOCH[28/1000] loss0.450-|Sample:16.34|
EPOCH[29/1000] loss0.421-|Sample:16.82|
EPOCH[30/1000] loss0.394-|Sample:17.65|
[TEST]
{'precision': array([0.00059362]), 'recall': array([0.00100332]), 'ndcg': array([0.00084127])}
EPOCH[31/1000] loss0.369-|Sample:16.57|
EPOCH[32/1000] loss0.343-|Sample:16.95|
EPOCH[33/1000] loss0.322-|Sample:16.37|
EPOCH[34/1000] loss0.302-|Sample:16.36|
EPOCH[35/1000] loss0.284-|Sample:17.20|
EPOCH[36/1000] loss0.266-|Sample:16.39|
EPOCH[37/1000] loss0.250-|Sample:16.89|
EPOCH[38/1000] loss0.236-|Sample:18.37|
EPOCH[39/1000] loss0.222-|Sample:17.39|
EPOCH[40/1000] loss0.210-|Sample:17.11|
[TEST]
{'precision': array([0.00124898]), 'recall': array([0.0020309]), 'ndcg': array([0.00181388])}
EPOCH[41/1000] loss0.198-|Sample:17.36|
EPOCH[42/1000] loss0.187-|Sample:16.17|
EPOCH[43/1000] loss0.177-|Sample:16.62|
EPOCH[44/1000] loss0.167-|Sample:18.78|
EPOCH[45/1000] loss0.159-|Sample:16.45|
EPOCH[46/1000] loss0.151-|Sample:16.81|
EPOCH[47/1000] loss0.143-|Sample:18.15|
EPOCH[48/1000] loss0.137-|Sample:17.09|
EPOCH[49/1000] loss0.130-|Sample:17.29|
EPOCH[50/1000] loss0.124-|Sample:18.40|
[TEST]
{'precision': array([0.00174477]), 'recall': array([0.00270818]), 'ndcg': array([0.00252882])}
EPOCH[51/1000] loss0.118-|Sample:16.42|
EPOCH[52/1000] loss0.112-|Sample:17.40|
EPOCH[53/1000] loss0.108-|Sample:17.37|
EPOCH[54/1000] loss0.103-|Sample:16.53|
EPOCH[55/1000] loss0.099-|Sample:18.29|
EPOCH[56/1000] loss0.095-|Sample:16.31|
EPOCH[57/1000] loss0.091-|Sample:18.57|
EPOCH[58/1000] loss0.087-|Sample:18.01|
EPOCH[59/1000] loss0.084-|Sample:17.93|
EPOCH[60/1000] loss0.081-|Sample:17.23|
[TEST]
{'precision': array([0.00216743]), 'recall': array([0.00332985]), 'ndcg': array([0.00316102])}
EPOCH[61/1000] loss0.079-|Sample:16.70|
EPOCH[62/1000] loss0.076-|Sample:16.25|
EPOCH[63/1000] loss0.073-|Sample:17.39|
EPOCH[64/1000] loss0.070-|Sample:16.21|
EPOCH[65/1000] loss0.068-|Sample:17.12|
EPOCH[66/1000] loss0.066-|Sample:17.28|
EPOCH[67/1000] loss0.064-|Sample:17.09|
EPOCH[68/1000] loss0.062-|Sample:16.34|
EPOCH[69/1000] loss0.060-|Sample:16.98|
EPOCH[70/1000] loss0.059-|Sample:16.51|
[TEST]
{'precision': array([0.00246092]), 'recall': array([0.00376273]), 'ndcg': array([0.00354986])}
EPOCH[71/1000] loss0.057-|Sample:18.15|
EPOCH[72/1000] loss0.056-|Sample:17.87|
EPOCH[73/1000] loss0.054-|Sample:17.93|
EPOCH[74/1000] loss0.052-|Sample:17.18|
EPOCH[75/1000] loss0.051-|Sample:18.26|
EPOCH[76/1000] loss0.050-|Sample:17.78|
EPOCH[77/1000] loss0.050-|Sample:18.71|
EPOCH[78/1000] loss0.047-|Sample:16.26|
EPOCH[79/1000] loss0.047-|Sample:17.03|
EPOCH[80/1000] loss0.045-|Sample:17.04|
[TEST]
{'precision': array([0.00276295]), 'recall': array([0.00433682]), 'ndcg': array([0.00405484])}
EPOCH[81/1000] loss0.045-|Sample:17.25|
EPOCH[82/1000] loss0.044-|Sample:17.59|
EPOCH[83/1000] loss0.043-|Sample:16.86|
EPOCH[84/1000] loss0.042-|Sample:16.45|
EPOCH[85/1000] loss0.041-|Sample:18.37|
EPOCH[86/1000] loss0.040-|Sample:16.36|
EPOCH[87/1000] loss0.040-|Sample:17.86|
EPOCH[88/1000] loss0.039-|Sample:17.34|
EPOCH[89/1000] loss0.038-|Sample:18.03|
EPOCH[90/1000] loss0.038-|Sample:17.95|
[TEST]
{'precision': array([0.00298425]), 'recall': array([0.00485481]), 'ndcg': array([0.00442347])}
EPOCH[91/1000] loss0.037-|Sample:16.75|
EPOCH[92/1000] loss0.036-|Sample:17.29|
EPOCH[93/1000] loss0.036-|Sample:16.61|
EPOCH[94/1000] loss0.035-|Sample:16.34|
EPOCH[95/1000] loss0.034-|Sample:16.82|
EPOCH[96/1000] loss0.034-|Sample:17.14|
EPOCH[97/1000] loss0.034-|Sample:17.42|
EPOCH[98/1000] loss0.033-|Sample:16.29|
EPOCH[99/1000] loss0.033-|Sample:18.14|
EPOCH[100/1000] loss0.032-|Sample:16.70|
[TEST]
{'precision': array([0.00328439]), 'recall': array([0.00563267]), 'ndcg': array([0.00498571])}
EPOCH[101/1000] loss0.032-|Sample:17.07|
EPOCH[102/1000] loss0.031-|Sample:16.67|
EPOCH[103/1000] loss0.031-|Sample:17.59|
EPOCH[104/1000] loss0.030-|Sample:16.42|
EPOCH[105/1000] loss0.030-|Sample:16.89|
EPOCH[106/1000] loss0.030-|Sample:16.18|
EPOCH[107/1000] loss0.029-|Sample:17.93|
EPOCH[108/1000] loss0.029-|Sample:18.07|
EPOCH[109/1000] loss0.028-|Sample:17.00|
EPOCH[110/1000] loss0.028-|Sample:17.56|
[TEST]
{'precision': array([0.00357692]), 'recall': array([0.00644183]), 'ndcg': array([0.00551612])}
EPOCH[111/1000] loss0.028-|Sample:16.84|
EPOCH[112/1000] loss0.027-|Sample:16.28|
EPOCH[113/1000] loss0.027-|Sample:17.76|
EPOCH[114/1000] loss0.027-|Sample:16.46|
EPOCH[115/1000] loss0.026-|Sample:16.62|
EPOCH[116/1000] loss0.026-|Sample:18.00|
EPOCH[117/1000] loss0.026-|Sample:16.92|
EPOCH[118/1000] loss0.025-|Sample:17.95|
EPOCH[119/1000] loss0.025-|Sample:16.98|
EPOCH[120/1000] loss0.025-|Sample:17.76|
[TEST]
{'precision': array([0.003897]), 'recall': array([0.00728909]), 'ndcg': array([0.00612416])}
EPOCH[121/1000] loss0.025-|Sample:17.42|
EPOCH[122/1000] loss0.024-|Sample:18.03|
EPOCH[123/1000] loss0.025-|Sample:17.71|
EPOCH[124/1000] loss0.024-|Sample:18.70|
EPOCH[125/1000] loss0.024-|Sample:17.89|
EPOCH[126/1000] loss0.024-|Sample:18.61|
EPOCH[127/1000] loss0.023-|Sample:16.39|
EPOCH[128/1000] loss0.023-|Sample:16.96|
EPOCH[129/1000] loss0.023-|Sample:16.92|
EPOCH[130/1000] loss0.023-|Sample:17.64|
[TEST]
{'precision': array([0.00417624]), 'recall': array([0.00814016]), 'ndcg': array([0.00666418])}
EPOCH[131/1000] loss0.023-|Sample:18.09|
EPOCH[132/1000] loss0.022-|Sample:16.39|
EPOCH[133/1000] loss0.022-|Sample:16.65|
EPOCH[134/1000] loss0.022-|Sample:17.76|
EPOCH[135/1000] loss0.022-|Sample:16.09|
EPOCH[136/1000] loss0.022-|Sample:18.32|
EPOCH[137/1000] loss0.022-|Sample:17.40|
EPOCH[138/1000] loss0.021-|Sample:18.14|
EPOCH[139/1000] loss0.021-|Sample:18.17|
EPOCH[140/1000] loss0.021-|Sample:17.50|
[TEST]
{'precision': array([0.00457516]), 'recall': array([0.0091131]), 'ndcg': array([0.00747615])}
EPOCH[141/1000] loss0.021-|Sample:18.93|
EPOCH[142/1000] loss0.021-|Sample:16.36|
EPOCH[143/1000] loss0.021-|Sample:16.54|
EPOCH[144/1000] loss0.020-|Sample:16.96|
EPOCH[145/1000] loss0.020-|Sample:16.34|
EPOCH[146/1000] loss0.020-|Sample:17.39|
EPOCH[147/1000] loss0.020-|Sample:17.45|
EPOCH[148/1000] loss0.020-|Sample:16.86|
EPOCH[149/1000] loss0.020-|Sample:16.53|
EPOCH[150/1000] loss0.019-|Sample:17.73|
[TEST]
{'precision': array([0.00495223]), 'recall': array([0.01024547]), 'ndcg': array([0.00815396])}
EPOCH[151/1000] loss0.020-|Sample:16.57|
EPOCH[152/1000] loss0.019-|Sample:16.34|
EPOCH[153/1000] loss0.019-|Sample:17.26|
EPOCH[154/1000] loss0.019-|Sample:18.14|
EPOCH[155/1000] loss0.019-|Sample:17.53|
EPOCH[156/1000] loss0.019-|Sample:17.20|
EPOCH[157/1000] loss0.019-|Sample:17.48|
EPOCH[158/1000] loss0.018-|Sample:16.71|
EPOCH[159/1000] loss0.018-|Sample:16.68|
EPOCH[160/1000] loss0.018-|Sample:18.03|
[TEST]
{'precision': array([0.0052799]), 'recall': array([0.01115725]), 'ndcg': array([0.00879284])}
EPOCH[161/1000] loss0.018-|Sample:17.11|
EPOCH[162/1000] loss0.018-|Sample:17.20|
EPOCH[163/1000] loss0.018-|Sample:16.31|
EPOCH[164/1000] loss0.018-|Sample:16.84|
EPOCH[165/1000] loss0.018-|Sample:16.68|
EPOCH[166/1000] loss0.018-|Sample:18.70|
EPOCH[167/1000] loss0.018-|Sample:17.62|
EPOCH[168/1000] loss0.017-|Sample:18.37|
EPOCH[169/1000] loss0.017-|Sample:17.59|
EPOCH[170/1000] loss0.017-|Sample:18.06|
[TEST]
{'precision': array([0.00562088]), 'recall': array([0.01221127]), 'ndcg': array([0.00944782])}
EPOCH[171/1000] loss0.017-|Sample:16.42|
EPOCH[172/1000] loss0.017-|Sample:16.15|
EPOCH[173/1000] loss0.017-|Sample:16.28|
EPOCH[174/1000] loss0.017-|Sample:17.31|
EPOCH[175/1000] loss0.017-|Sample:16.37|
EPOCH[176/1000] loss0.016-|Sample:18.23|
EPOCH[177/1000] loss0.017-|Sample:15.03|
EPOCH[178/1000] loss0.016-|Sample:15.07|
EPOCH[179/1000] loss0.016-|Sample:15.18|
EPOCH[180/1000] loss0.016-|Sample:14.73|
[TEST]
{'precision': array([0.00594761]), 'recall': array([0.01307345]), 'ndcg': array([0.01025062])}
EPOCH[181/1000] loss0.016-|Sample:15.64|
EPOCH[182/1000] loss0.016-|Sample:15.06|
EPOCH[183/1000] loss0.016-|Sample:16.59|
EPOCH[184/1000] loss0.016-|Sample:17.28|
EPOCH[185/1000] loss0.016-|Sample:16.29|
EPOCH[186/1000] loss0.016-|Sample:17.40|
EPOCH[187/1000] loss0.016-|Sample:17.50|
EPOCH[188/1000] loss0.016-|Sample:17.36|
EPOCH[189/1000] loss0.016-|Sample:17.39|
EPOCH[190/1000] loss0.015-|Sample:17.20|
[TEST]
{'precision': array([0.00631138]), 'recall': array([0.01398754]), 'ndcg': array([0.01089123])}
EPOCH[191/1000] loss0.015-|Sample:16.42|
EPOCH[192/1000] loss0.015-|Sample:18.06|
EPOCH[193/1000] loss0.015-|Sample:16.45|
EPOCH[194/1000] loss0.015-|Sample:17.14|
EPOCH[195/1000] loss0.015-|Sample:16.75|
EPOCH[196/1000] loss0.015-|Sample:17.14|
EPOCH[197/1000] loss0.015-|Sample:16.70|
EPOCH[198/1000] loss0.015-|Sample:17.29|
EPOCH[199/1000] loss0.015-|Sample:16.86|
EPOCH[200/1000] loss0.015-|Sample:16.81|
[TEST]
{'precision': array([0.00656593]), 'recall': array([0.0147211]), 'ndcg': array([0.01143783])}
EPOCH[201/1000] loss0.015-|Sample:16.20|
EPOCH[202/1000] loss0.015-|Sample:16.86|
EPOCH[203/1000] loss0.014-|Sample:18.29|
EPOCH[204/1000] loss0.014-|Sample:16.39|
EPOCH[205/1000] loss0.015-|Sample:16.67|
EPOCH[206/1000] loss0.014-|Sample:17.21|
EPOCH[207/1000] loss0.014-|Sample:17.34|
EPOCH[208/1000] loss0.014-|Sample:17.40|
EPOCH[209/1000] loss0.014-|Sample:17.73|
EPOCH[210/1000] loss0.014-|Sample:18.43|
[TEST]
{'precision': array([0.0068917]), 'recall': array([0.01558904]), 'ndcg': array([0.01212422])}
EPOCH[211/1000] loss0.014-|Sample:16.42|
EPOCH[212/1000] loss0.014-|Sample:18.29|
EPOCH[213/1000] loss0.014-|Sample:16.67|
EPOCH[214/1000] loss0.014-|Sample:16.20|
EPOCH[215/1000] loss0.014-|Sample:17.25|
EPOCH[216/1000] loss0.014-|Sample:17.23|
EPOCH[217/1000] loss0.014-|Sample:16.79|
EPOCH[218/1000] loss0.014-|Sample:17.93|
EPOCH[219/1000] loss0.013-|Sample:18.23|
EPOCH[220/1000] loss0.013-|Sample:17.18|
[TEST]
{'precision': array([0.00716525]), 'recall': array([0.01629046]), 'ndcg': array([0.01270843])}
EPOCH[221/1000] loss0.013-|Sample:17.76|
EPOCH[222/1000] loss0.013-|Sample:16.78|
EPOCH[223/1000] loss0.013-|Sample:16.78|
EPOCH[224/1000] loss0.013-|Sample:16.32|
EPOCH[225/1000] loss0.013-|Sample:16.29|
EPOCH[226/1000] loss0.013-|Sample:18.70|
EPOCH[227/1000] loss0.013-|Sample:16.67|
EPOCH[228/1000] loss0.013-|Sample:17.93|
EPOCH[229/1000] loss0.013-|Sample:16.45|
EPOCH[230/1000] loss0.013-|Sample:17.25|
[TEST]
{'precision': array([0.00747203]), 'recall': array([0.01708772]), 'ndcg': array([0.01317197])}
EPOCH[231/1000] loss0.013-|Sample:16.87|
EPOCH[232/1000] loss0.013-|Sample:16.36|
EPOCH[233/1000] loss0.013-|Sample:16.48|
EPOCH[234/1000] loss0.013-|Sample:18.43|
EPOCH[235/1000] loss0.013-|Sample:17.51|
EPOCH[236/1000] loss0.013-|Sample:17.20|
EPOCH[237/1000] loss0.013-|Sample:16.86|
EPOCH[238/1000] loss0.013-|Sample:18.14|
EPOCH[239/1000] loss0.013-|Sample:16.81|
EPOCH[240/1000] loss0.012-|Sample:17.28|
[TEST]
{'precision': array([0.0078187]), 'recall': array([0.01788803]), 'ndcg': array([0.01383486])}
EPOCH[241/1000] loss0.012-|Sample:17.79|
EPOCH[242/1000] loss0.012-|Sample:16.12|
EPOCH[243/1000] loss0.012-|Sample:17.09|
EPOCH[244/1000] loss0.012-|Sample:17.14|
EPOCH[245/1000] loss0.012-|Sample:16.50|
EPOCH[246/1000] loss0.012-|Sample:18.28|
EPOCH[247/1000] loss0.012-|Sample:17.50|
EPOCH[248/1000] loss0.012-|Sample:17.96|
EPOCH[249/1000] loss0.012-|Sample:17.71|
EPOCH[250/1000] loss0.012-|Sample:17.87|
[TEST]
{'precision': array([0.00799157]), 'recall': array([0.01827664]), 'ndcg': array([0.01424446])}
EPOCH[251/1000] loss0.012-|Sample:18.11|
EPOCH[252/1000] loss0.012-|Sample:16.78|
EPOCH[253/1000] loss0.012-|Sample:17.64|
EPOCH[254/1000] loss0.012-|Sample:17.73|
EPOCH[255/1000] loss0.012-|Sample:16.59|
EPOCH[256/1000] loss0.012-|Sample:16.82|
EPOCH[257/1000] loss0.012-|Sample:18.18|
EPOCH[258/1000] loss0.012-|Sample:16.86|
EPOCH[259/1000] loss0.012-|Sample:16.81|
EPOCH[260/1000] loss0.012-|Sample:18.06|
[TEST]
{'precision': array([0.00823661]), 'recall': array([0.01880041]), 'ndcg': array([0.01460305])}
EPOCH[261/1000] loss0.012-|Sample:17.92|
EPOCH[262/1000] loss0.012-|Sample:17.01|
EPOCH[263/1000] loss0.012-|Sample:17.25|
EPOCH[264/1000] loss0.011-|Sample:16.62|
EPOCH[265/1000] loss0.011-|Sample:17.64|
EPOCH[266/1000] loss0.012-|Sample:16.42|
EPOCH[267/1000] loss0.011-|Sample:17.11|
EPOCH[268/1000] loss0.011-|Sample:17.40|
EPOCH[269/1000] loss0.011-|Sample:18.03|
EPOCH[270/1000] loss0.011-|Sample:17.17|
[TEST]
{'precision': array([0.00848451]), 'recall': array([0.01950767]), 'ndcg': array([0.01508186])}
EPOCH[271/1000] loss0.011-|Sample:16.25|
EPOCH[272/1000] loss0.011-|Sample:16.09|
EPOCH[273/1000] loss0.011-|Sample:18.81|
EPOCH[274/1000] loss0.011-|Sample:17.11|
EPOCH[275/1000] loss0.011-|Sample:17.81|
EPOCH[276/1000] loss0.011-|Sample:16.59|
EPOCH[277/1000] loss0.011-|Sample:17.39|
EPOCH[278/1000] loss0.011-|Sample:17.46|
EPOCH[279/1000] loss0.011-|Sample:17.45|
EPOCH[280/1000] loss0.011-|Sample:17.15|
[TEST]
{'precision': array([0.0085282]), 'recall': array([0.01976562]), 'ndcg': array([0.01516342])}
EPOCH[281/1000] loss0.011-|Sample:18.12|
EPOCH[282/1000] loss0.011-|Sample:17.61|
EPOCH[283/1000] loss0.011-|Sample:18.71|
EPOCH[284/1000] loss0.011-|Sample:17.39|
EPOCH[285/1000] loss0.011-|Sample:17.92|
EPOCH[286/1000] loss0.011-|Sample:17.43|
EPOCH[287/1000] loss0.011-|Sample:16.56|
EPOCH[288/1000] loss0.011-|Sample:16.32|
EPOCH[289/1000] loss0.011-|Sample:16.65|
EPOCH[290/1000] loss0.011-|Sample:16.20|
[TEST]
{'precision': array([0.00888817]), 'recall': array([0.02062747]), 'ndcg': array([0.01594591])}
EPOCH[291/1000] loss0.011-|Sample:19.26|
EPOCH[292/1000] loss0.011-|Sample:17.26|
EPOCH[293/1000] loss0.011-|Sample:17.98|
EPOCH[294/1000] loss0.011-|Sample:17.42|
EPOCH[295/1000] loss0.011-|Sample:17.12|
EPOCH[296/1000] loss0.011-|Sample:16.95|
EPOCH[297/1000] loss0.011-|Sample:18.29|
EPOCH[298/1000] loss0.011-|Sample:16.18|
EPOCH[299/1000] loss0.011-|Sample:17.62|
EPOCH[300/1000] loss0.010-|Sample:17.61|
[TEST]
{'precision': array([0.00896036]), 'recall': array([0.02097182]), 'ndcg': array([0.01617426])}
EPOCH[301/1000] loss0.011-|Sample:16.67|
EPOCH[302/1000] loss0.010-|Sample:16.70|
EPOCH[303/1000] loss0.011-|Sample:17.42|
EPOCH[304/1000] loss0.010-|Sample:16.28|
EPOCH[305/1000] loss0.010-|Sample:17.87|
EPOCH[306/1000] loss0.010-|Sample:16.79|
EPOCH[307/1000] loss0.010-|Sample:18.20|
EPOCH[308/1000] loss0.010-|Sample:17.37|
EPOCH[309/1000] loss0.010-|Sample:16.96|
EPOCH[310/1000] loss0.010-|Sample:16.96|
[TEST]
{'precision': array([0.00924054]), 'recall': array([0.02173726]), 'ndcg': array([0.01675876])}
EPOCH[311/1000] loss0.010-|Sample:17.84|
EPOCH[312/1000] loss0.010-|Sample:16.70|
EPOCH[313/1000] loss0.010-|Sample:18.18|
EPOCH[314/1000] loss0.010-|Sample:16.86|
EPOCH[315/1000] loss0.010-|Sample:17.93|
EPOCH[316/1000] loss0.010-|Sample:17.54|
EPOCH[317/1000] loss0.010-|Sample:17.51|
EPOCH[318/1000] loss0.010-|Sample:17.31|
EPOCH[319/1000] loss0.010-|Sample:18.48|
EPOCH[320/1000] loss0.010-|Sample:16.71|
[TEST]
{'precision': array([0.00941816]), 'recall': array([0.02213575]), 'ndcg': array([0.01720552])}
EPOCH[321/1000] loss0.010-|Sample:17.01|
EPOCH[322/1000] loss0.010-|Sample:18.37|
EPOCH[323/1000] loss0.010-|Sample:17.25|
EPOCH[324/1000] loss0.010-|Sample:18.48|
EPOCH[325/1000] loss0.010-|Sample:16.29|
EPOCH[326/1000] loss0.010-|Sample:17.92|
EPOCH[327/1000] loss0.010-|Sample:17.87|
EPOCH[328/1000] loss0.010-|Sample:17.53|
EPOCH[329/1000] loss0.010-|Sample:16.92|
EPOCH[330/1000] loss0.010-|Sample:16.87|
[TEST]
{'precision': array([0.00950839]), 'recall': array([0.0224212]), 'ndcg': array([0.0172032])}
EPOCH[331/1000] loss0.010-|Sample:16.50|
EPOCH[332/1000] loss0.010-|Sample:17.87|
EPOCH[333/1000] loss0.010-|Sample:17.20|
EPOCH[334/1000] loss0.010-|Sample:18.71|
EPOCH[335/1000] loss0.010-|Sample:16.25|
EPOCH[336/1000] loss0.010-|Sample:17.81|
EPOCH[337/1000] loss0.010-|Sample:17.65|
EPOCH[338/1000] loss0.010-|Sample:17.29|
EPOCH[339/1000] loss0.010-|Sample:17.26|
EPOCH[340/1000] loss0.010-|Sample:18.68|
[TEST]
{'precision': array([0.00962711]), 'recall': array([0.02274123]), 'ndcg': array([0.0174768])}
EPOCH[341/1000] loss0.010-|Sample:17.31|
EPOCH[342/1000] loss0.010-|Sample:16.82|
EPOCH[343/1000] loss0.010-|Sample:16.46|
EPOCH[344/1000] loss0.010-|Sample:32.13|
EPOCH[345/1000] loss0.010-|Sample:18.04|
EPOCH[346/1000] loss0.010-|Sample:18.36|
EPOCH[347/1000] loss0.010-|Sample:17.79|
EPOCH[348/1000] loss0.010-|Sample:17.18|
EPOCH[349/1000] loss0.010-|Sample:17.65|
EPOCH[350/1000] loss0.010-|Sample:17.37|
[TEST]
{'precision': array([0.00978288]), 'recall': array([0.02326801]), 'ndcg': array([0.01790505])}
EPOCH[351/1000] loss0.010-|Sample:16.84|
EPOCH[352/1000] loss0.010-|Sample:16.14|
EPOCH[353/1000] loss0.010-|Sample:17.40|
EPOCH[354/1000] loss0.009-|Sample:16.15|
EPOCH[355/1000] loss0.010-|Sample:17.17|
EPOCH[356/1000] loss0.009-|Sample:17.25|
EPOCH[357/1000] loss0.009-|Sample:18.14|
EPOCH[358/1000] loss0.009-|Sample:17.61|
EPOCH[359/1000] loss0.009-|Sample:18.64|
EPOCH[360/1000] loss0.010-|Sample:17.61|
[TEST]
{'precision': array([0.01010676]), 'recall': array([0.02389617]), 'ndcg': array([0.01836159])}
EPOCH[361/1000] loss0.010-|Sample:18.54|
EPOCH[362/1000] loss0.009-|Sample:17.07|
EPOCH[363/1000] loss0.009-|Sample:18.17|
EPOCH[364/1000] loss0.009-|Sample:16.14|
EPOCH[365/1000] loss0.009-|Sample:16.18|
EPOCH[366/1000] loss0.009-|Sample:18.15|
EPOCH[367/1000] loss0.009-|Sample:17.15|
EPOCH[368/1000] loss0.009-|Sample:18.14|
EPOCH[369/1000] loss0.009-|Sample:17.73|
EPOCH[370/1000] loss0.009-|Sample:16.65|
[TEST]
{'precision': array([0.01011056]), 'recall': array([0.02396272]), 'ndcg': array([0.01839918])}
EPOCH[371/1000] loss0.009-|Sample:17.40|
EPOCH[372/1000] loss0.009-|Sample:16.79|
EPOCH[373/1000] loss0.009-|Sample:17.31|
EPOCH[374/1000] loss0.009-|Sample:16.26|
EPOCH[375/1000] loss0.009-|Sample:17.06|
EPOCH[376/1000] loss0.009-|Sample:17.73|
EPOCH[377/1000] loss0.009-|Sample:16.79|
EPOCH[378/1000] loss0.009-|Sample:16.64|
EPOCH[379/1000] loss0.009-|Sample:16.89|
EPOCH[380/1000] loss0.009-|Sample:16.75|
[TEST]
{'precision': array([0.01027202]), 'recall': array([0.02440298]), 'ndcg': array([0.01877111])}
EPOCH[381/1000] loss0.009-|Sample:18.48|
EPOCH[382/1000] loss0.009-|Sample:16.45|
EPOCH[383/1000] loss0.009-|Sample:16.89|
EPOCH[384/1000] loss0.009-|Sample:18.28|
EPOCH[385/1000] loss0.009-|Sample:17.51|
EPOCH[386/1000] loss0.009-|Sample:16.75|
EPOCH[387/1000] loss0.009-|Sample:18.45|
EPOCH[388/1000] loss0.009-|Sample:16.65|
EPOCH[389/1000] loss0.009-|Sample:16.87|
EPOCH[390/1000] loss0.009-|Sample:17.40|
[TEST]
{'precision': array([0.01042874]), 'recall': array([0.02485027]), 'ndcg': array([0.01906559])}
EPOCH[391/1000] loss0.009-|Sample:17.32|
EPOCH[392/1000] loss0.009-|Sample:17.12|
EPOCH[393/1000] loss0.009-|Sample:17.18|
EPOCH[394/1000] loss0.009-|Sample:16.50|
EPOCH[395/1000] loss0.009-|Sample:17.81|
EPOCH[396/1000] loss0.009-|Sample:17.32|
EPOCH[397/1000] loss0.009-|Sample:17.82|
EPOCH[398/1000] loss0.009-|Sample:17.00|
EPOCH[399/1000] loss0.009-|Sample:17.48|
EPOCH[400/1000] loss0.009-|Sample:16.79|
[TEST]
{'precision': array([0.01050947]), 'recall': array([0.0251729]), 'ndcg': array([0.01936529])}
EPOCH[401/1000] loss0.009-|Sample:17.12|
EPOCH[402/1000] loss0.009-|Sample:16.34|
EPOCH[403/1000] loss0.009-|Sample:16.73|
EPOCH[404/1000] loss0.009-|Sample:17.73|
EPOCH[405/1000] loss0.009-|Sample:17.18|
EPOCH[406/1000] loss0.009-|Sample:17.68|
EPOCH[407/1000] loss0.009-|Sample:16.28|
EPOCH[408/1000] loss0.009-|Sample:17.11|
EPOCH[409/1000] loss0.009-|Sample:16.18|
EPOCH[410/1000] loss0.009-|Sample:17.70|
[TEST]
{'precision': array([0.01073267]), 'recall': array([0.02558851]), 'ndcg': array([0.01959018])}
EPOCH[411/1000] loss0.009-|Sample:16.50|
EPOCH[412/1000] loss0.009-|Sample:17.92|
EPOCH[413/1000] loss0.009-|Sample:17.82|
EPOCH[414/1000] loss0.009-|Sample:17.62|
EPOCH[415/1000] loss0.009-|Sample:17.68|
EPOCH[416/1000] loss0.009-|Sample:16.56|
EPOCH[417/1000] loss0.009-|Sample:16.00|
EPOCH[418/1000] loss0.009-|Sample:18.14|
EPOCH[419/1000] loss0.009-|Sample:17.43|
EPOCH[420/1000] loss0.009-|Sample:18.42|
[TEST]
{'precision': array([0.01074597]), 'recall': array([0.02566287]), 'ndcg': array([0.01966185])}
EPOCH[421/1000] loss0.009-|Sample:16.50|
EPOCH[422/1000] loss0.009-|Sample:17.54|
EPOCH[423/1000] loss0.009-|Sample:16.64|
EPOCH[424/1000] loss0.009-|Sample:16.31|
EPOCH[425/1000] loss0.009-|Sample:16.12|
EPOCH[426/1000] loss0.009-|Sample:18.17|
EPOCH[427/1000] loss0.009-|Sample:16.43|
EPOCH[428/1000] loss0.009-|Sample:16.34|
EPOCH[429/1000] loss0.009-|Sample:17.79|
EPOCH[430/1000] loss0.009-|Sample:16.00|
[TEST]
{'precision': array([0.01097392]), 'recall': array([0.02628727]), 'ndcg': array([0.02014178])}
EPOCH[431/1000] loss0.009-|Sample:16.65|
EPOCH[432/1000] loss0.009-|Sample:18.50|
EPOCH[433/1000] loss0.009-|Sample:16.50|
EPOCH[434/1000] loss0.009-|Sample:16.21|
EPOCH[435/1000] loss0.009-|Sample:16.70|
EPOCH[436/1000] loss0.009-|Sample:17.26|
EPOCH[437/1000] loss0.009-|Sample:17.15|
EPOCH[438/1000] loss0.009-|Sample:18.92|
EPOCH[439/1000] loss0.009-|Sample:17.07|
EPOCH[440/1000] loss0.009-|Sample:17.32|
[TEST]
{'precision': array([0.01106605]), 'recall': array([0.02659372]), 'ndcg': array([0.02028327])}
EPOCH[441/1000] loss0.009-|Sample:16.89|
EPOCH[442/1000] loss0.009-|Sample:17.64|
EPOCH[443/1000] loss0.009-|Sample:17.64|
EPOCH[444/1000] loss0.009-|Sample:17.89|
EPOCH[445/1000] loss0.008-|Sample:17.04|
EPOCH[446/1000] loss0.009-|Sample:17.98|
EPOCH[447/1000] loss0.009-|Sample:16.89|
EPOCH[448/1000] loss0.009-|Sample:17.57|
EPOCH[449/1000] loss0.009-|Sample:16.71|
EPOCH[450/1000] loss0.009-|Sample:16.54|
[TEST]
{'precision': array([0.01108694]), 'recall': array([0.02688297]), 'ndcg': array([0.02052982])}
EPOCH[451/1000] loss0.008-|Sample:17.56|
EPOCH[452/1000] loss0.008-|Sample:17.71|
EPOCH[453/1000] loss0.009-|Sample:17.20|
EPOCH[454/1000] loss0.008-|Sample:18.42|
EPOCH[455/1000] loss0.009-|Sample:17.12|
EPOCH[456/1000] loss0.008-|Sample:17.17|
EPOCH[457/1000] loss0.009-|Sample:17.34|
EPOCH[458/1000] loss0.008-|Sample:17.18|
EPOCH[459/1000] loss0.009-|Sample:16.61|
EPOCH[460/1000] loss0.009-|Sample:18.53|
[TEST]
{'precision': array([0.01117148]), 'recall': array([0.02702392]), 'ndcg': array([0.02076581])}
EPOCH[461/1000] loss0.008-|Sample:16.51|
EPOCH[462/1000] loss0.008-|Sample:17.29|
EPOCH[463/1000] loss0.008-|Sample:16.36|
EPOCH[464/1000] loss0.008-|Sample:16.98|
EPOCH[465/1000] loss0.008-|Sample:17.87|
EPOCH[466/1000] loss0.009-|Sample:17.73|
EPOCH[467/1000] loss0.008-|Sample:17.18|
EPOCH[468/1000] loss0.008-|Sample:18.61|
EPOCH[469/1000] loss0.008-|Sample:18.03|
EPOCH[470/1000] loss0.008-|Sample:17.68|
[TEST]
{'precision': array([0.01131584]), 'recall': array([0.02727659]), 'ndcg': array([0.02073325])}
EPOCH[471/1000] loss0.008-|Sample:16.53|
EPOCH[472/1000] loss0.008-|Sample:16.40|
EPOCH[473/1000] loss0.008-|Sample:18.06|
EPOCH[474/1000] loss0.008-|Sample:17.37|
EPOCH[475/1000] loss0.008-|Sample:17.36|
EPOCH[476/1000] loss0.008-|Sample:16.21|
EPOCH[477/1000] loss0.008-|Sample:16.95|
EPOCH[478/1000] loss0.008-|Sample:16.20|
EPOCH[479/1000] loss0.008-|Sample:17.01|
EPOCH[480/1000] loss0.008-|Sample:16.23|
[TEST]
{'precision': array([0.01136428]), 'recall': array([0.02747252]), 'ndcg': array([0.02099153])}
EPOCH[481/1000] loss0.008-|Sample:19.48|
EPOCH[482/1000] loss0.008-|Sample:17.37|
EPOCH[483/1000] loss0.008-|Sample:17.68|
EPOCH[484/1000] loss0.008-|Sample:17.61|
EPOCH[485/1000] loss0.008-|Sample:17.67|
EPOCH[486/1000] loss0.008-|Sample:16.53|
EPOCH[487/1000] loss0.008-|Sample:16.36|
EPOCH[488/1000] loss0.008-|Sample:17.89|
EPOCH[489/1000] loss0.008-|Sample:17.45|
EPOCH[490/1000] loss0.008-|Sample:17.54|
[TEST]
{'precision': array([0.01149726]), 'recall': array([0.02785714]), 'ndcg': array([0.02127764])}
EPOCH[491/1000] loss0.008-|Sample:17.57|
EPOCH[492/1000] loss0.008-|Sample:16.40|
EPOCH[493/1000] loss0.008-|Sample:17.40|
EPOCH[494/1000] loss0.008-|Sample:16.48|
EPOCH[495/1000] loss0.008-|Sample:17.09|
EPOCH[496/1000] loss0.008-|Sample:17.79|
EPOCH[497/1000] loss0.008-|Sample:17.61|
EPOCH[498/1000] loss0.008-|Sample:17.61|
EPOCH[499/1000] loss0.008-|Sample:17.29|
EPOCH[500/1000] loss0.008-|Sample:17.28|
[TEST]
{'precision': array([0.01161408]), 'recall': array([0.02828951]), 'ndcg': array([0.02141565])}
EPOCH[501/1000] loss0.008-|Sample:17.75|
EPOCH[502/1000] loss0.008-|Sample:16.93|
EPOCH[503/1000] loss0.008-|Sample:17.89|
EPOCH[504/1000] loss0.008-|Sample:16.59|
EPOCH[505/1000] loss0.008-|Sample:17.82|
EPOCH[506/1000] loss0.008-|Sample:18.01|
EPOCH[507/1000] loss0.008-|Sample:17.43|
EPOCH[508/1000] loss0.008-|Sample:17.43|
EPOCH[509/1000] loss0.008-|Sample:18.01|
EPOCH[510/1000] loss0.008-|Sample:16.78|
[TEST]
{'precision': array([0.01155709]), 'recall': array([0.02810733]), 'ndcg': array([0.02131469])}
EPOCH[511/1000] loss0.008-|Sample:17.00|
EPOCH[512/1000] loss0.008-|Sample:17.20|
EPOCH[513/1000] loss0.008-|Sample:17.01|
EPOCH[514/1000] loss0.008-|Sample:16.26|
EPOCH[515/1000] loss0.008-|Sample:18.87|
EPOCH[516/1000] loss0.008-|Sample:17.68|
EPOCH[517/1000] loss0.008-|Sample:17.86|
EPOCH[518/1000] loss0.008-|Sample:17.56|
EPOCH[519/1000] loss0.008-|Sample:18.11|
EPOCH[520/1000] loss0.008-|Sample:18.23|
[TEST]
{'precision': array([0.01174325]), 'recall': array([0.02828109]), 'ndcg': array([0.0215288])}
EPOCH[521/1000] loss0.008-|Sample:16.39|
EPOCH[522/1000] loss0.008-|Sample:16.95|
EPOCH[523/1000] loss0.008-|Sample:16.36|
EPOCH[524/1000] loss0.008-|Sample:16.56|
EPOCH[525/1000] loss0.008-|Sample:18.28|
EPOCH[526/1000] loss0.008-|Sample:17.53|
EPOCH[527/1000] loss0.008-|Sample:17.11|
EPOCH[528/1000] loss0.008-|Sample:17.67|
EPOCH[529/1000] loss0.008-|Sample:17.29|
EPOCH[530/1000] loss0.008-|Sample:17.68|
[TEST]
{'precision': array([0.0117689]), 'recall': array([0.02850973]), 'ndcg': array([0.02166375])}
EPOCH[531/1000] loss0.008-|Sample:17.00|
EPOCH[532/1000] loss0.008-|Sample:17.20|
EPOCH[533/1000] loss0.008-|Sample:17.57|
EPOCH[534/1000] loss0.008-|Sample:17.07|
EPOCH[535/1000] loss0.008-|Sample:17.36|
EPOCH[536/1000] loss0.008-|Sample:18.96|
EPOCH[537/1000] loss0.008-|Sample:16.84|
EPOCH[538/1000] loss0.008-|Sample:18.50|
EPOCH[539/1000] loss0.008-|Sample:17.76|
EPOCH[540/1000] loss0.008-|Sample:17.53|
[TEST]
{'precision': array([0.01180309]), 'recall': array([0.02872701]), 'ndcg': array([0.02189525])}
EPOCH[541/1000] loss0.008-|Sample:17.37|
EPOCH[542/1000] loss0.008-|Sample:16.09|
EPOCH[543/1000] loss0.008-|Sample:16.21|
EPOCH[544/1000] loss0.008-|Sample:17.53|
EPOCH[545/1000] loss0.008-|Sample:17.17|
EPOCH[546/1000] loss0.008-|Sample:17.67|
EPOCH[547/1000] loss0.008-|Sample:18.51|
EPOCH[548/1000] loss0.008-|Sample:16.15|
EPOCH[549/1000] loss0.008-|Sample:16.34|
EPOCH[550/1000] loss0.008-|Sample:17.09|
[TEST]
{'precision': array([0.01184013]), 'recall': array([0.02867983]), 'ndcg': array([0.02181456])}
EPOCH[551/1000] loss0.008-|Sample:18.54|
EPOCH[552/1000] loss0.008-|Sample:18.01|
EPOCH[553/1000] loss0.008-|Sample:17.67|
EPOCH[554/1000] loss0.008-|Sample:17.11|
EPOCH[555/1000] loss0.008-|Sample:18.20|
EPOCH[556/1000] loss0.008-|Sample:16.96|
EPOCH[557/1000] loss0.008-|Sample:16.96|
EPOCH[558/1000] loss0.008-|Sample:18.90|
EPOCH[559/1000] loss0.008-|Sample:17.42|
EPOCH[560/1000] loss0.008-|Sample:17.48|
[TEST]
{'precision': array([0.01197215]), 'recall': array([0.02903356]), 'ndcg': array([0.022093])}
EPOCH[561/1000] loss0.008-|Sample:16.11|
EPOCH[562/1000] loss0.008-|Sample:16.23|
EPOCH[563/1000] loss0.008-|Sample:16.75|
EPOCH[564/1000] loss0.008-|Sample:16.31|
EPOCH[565/1000] loss0.008-|Sample:18.03|
EPOCH[566/1000] loss0.008-|Sample:16.79|
EPOCH[567/1000] loss0.008-|Sample:18.48|
EPOCH[568/1000] loss0.008-|Sample:17.50|
EPOCH[569/1000] loss0.008-|Sample:18.62|
EPOCH[570/1000] loss0.008-|Sample:17.25|
[TEST]
{'precision': array([0.01198925]), 'recall': array([0.02896291]), 'ndcg': array([0.02217388])}
EPOCH[571/1000] loss0.008-|Sample:16.31|
EPOCH[572/1000] loss0.008-|Sample:16.37|
EPOCH[573/1000] loss0.008-|Sample:16.50|
EPOCH[574/1000] loss0.008-|Sample:16.71|
EPOCH[575/1000] loss0.008-|Sample:18.15|
EPOCH[576/1000] loss0.008-|Sample:16.17|
EPOCH[577/1000] loss0.008-|Sample:17.56|
EPOCH[578/1000] loss0.008-|Sample:16.76|
EPOCH[579/1000] loss0.008-|Sample:16.34|
EPOCH[580/1000] loss0.008-|Sample:16.82|
[TEST]
{'precision': array([0.01211937]), 'recall': array([0.02944114]), 'ndcg': array([0.0221995])}
EPOCH[581/1000] loss0.008-|Sample:17.65|
EPOCH[582/1000] loss0.008-|Sample:17.28|
EPOCH[583/1000] loss0.008-|Sample:17.96|
EPOCH[584/1000] loss0.008-|Sample:16.31|
EPOCH[585/1000] loss0.008-|Sample:16.31|
EPOCH[586/1000] loss0.008-|Sample:18.06|
EPOCH[587/1000] loss0.008-|Sample:17.21|
EPOCH[588/1000] loss0.008-|Sample:17.17|
EPOCH[589/1000] loss0.008-|Sample:18.54|
EPOCH[590/1000] loss0.008-|Sample:16.43|
[TEST]
{'precision': array([0.0121944]), 'recall': array([0.02959777]), 'ndcg': array([0.02242779])}
EPOCH[591/1000] loss0.008-|Sample:18.34|
EPOCH[592/1000] loss0.008-|Sample:17.04|
EPOCH[593/1000] loss0.008-|Sample:17.06|
EPOCH[594/1000] loss0.008-|Sample:18.04|
EPOCH[595/1000] loss0.008-|Sample:17.68|
EPOCH[596/1000] loss0.008-|Sample:16.81|
EPOCH[597/1000] loss0.008-|Sample:16.42|
EPOCH[598/1000] loss0.008-|Sample:17.37|
EPOCH[599/1000] loss0.008-|Sample:17.59|
EPOCH[600/1000] loss0.008-|Sample:16.48|
[TEST]
{'precision': array([0.01215926]), 'recall': array([0.02947581]), 'ndcg': array([0.02238711])}
EPOCH[601/1000] loss0.008-|Sample:16.39|
EPOCH[602/1000] loss0.008-|Sample:16.31|
EPOCH[603/1000] loss0.008-|Sample:18.36|
EPOCH[604/1000] loss0.008-|Sample:16.29|
EPOCH[605/1000] loss0.008-|Sample:18.36|
EPOCH[606/1000] loss0.008-|Sample:17.06|
EPOCH[607/1000] loss0.008-|Sample:18.01|
EPOCH[608/1000] loss0.008-|Sample:18.03|
EPOCH[609/1000] loss0.008-|Sample:17.07|
EPOCH[610/1000] loss0.008-|Sample:17.03|
[TEST]
{'precision': array([0.01225424]), 'recall': array([0.02969379]), 'ndcg': array([0.02259284])}
EPOCH[611/1000] loss0.008-|Sample:16.28|
EPOCH[612/1000] loss0.008-|Sample:16.31|
EPOCH[613/1000] loss0.008-|Sample:17.25|
EPOCH[614/1000] loss0.008-|Sample:16.67|
EPOCH[615/1000] loss0.008-|Sample:18.23|
EPOCH[616/1000] loss0.008-|Sample:16.45|
EPOCH[617/1000] loss0.008-|Sample:17.43|
EPOCH[618/1000] loss0.008-|Sample:16.46|
EPOCH[619/1000] loss0.008-|Sample:16.92|
EPOCH[620/1000] loss0.008-|Sample:18.07|
[TEST]
{'precision': array([0.01218871]), 'recall': array([0.02961751]), 'ndcg': array([0.02259264])}
EPOCH[621/1000] loss0.008-|Sample:17.09|
EPOCH[622/1000] loss0.008-|Sample:17.59|
EPOCH[623/1000] loss0.008-|Sample:17.62|
EPOCH[624/1000] loss0.008-|Sample:17.26|
EPOCH[625/1000] loss0.008-|Sample:17.21|
EPOCH[626/1000] loss0.008-|Sample:18.45|
EPOCH[627/1000] loss0.008-|Sample:17.29|
EPOCH[628/1000] loss0.008-|Sample:17.76|
EPOCH[629/1000] loss0.008-|Sample:17.23|
EPOCH[630/1000] loss0.008-|Sample:17.18|
[TEST]
{'precision': array([0.01225994]), 'recall': array([0.02982049]), 'ndcg': array([0.02263765])}
EPOCH[631/1000] loss0.008-|Sample:18.00|
EPOCH[632/1000] loss0.008-|Sample:17.39|
EPOCH[633/1000] loss0.008-|Sample:18.75|
EPOCH[634/1000] loss0.008-|Sample:17.39|
EPOCH[635/1000] loss0.008-|Sample:17.06|
EPOCH[636/1000] loss0.008-|Sample:17.09|
EPOCH[637/1000] loss0.008-|Sample:16.20|
EPOCH[638/1000] loss0.008-|Sample:16.23|
EPOCH[639/1000] loss0.008-|Sample:18.09|
EPOCH[640/1000] loss0.008-|Sample:17.04|
[TEST]
{'precision': array([0.01242235]), 'recall': array([0.03039818]), 'ndcg': array([0.02290998])}
EPOCH[641/1000] loss0.008-|Sample:17.37|
EPOCH[642/1000] loss0.008-|Sample:16.98|
EPOCH[643/1000] loss0.008-|Sample:16.96|
EPOCH[644/1000] loss0.008-|Sample:16.78|
EPOCH[645/1000] loss0.008-|Sample:16.61|
EPOCH[646/1000] loss0.008-|Sample:17.34|
EPOCH[647/1000] loss0.008-|Sample:17.29|
EPOCH[648/1000] loss0.008-|Sample:17.39|
EPOCH[649/1000] loss0.008-|Sample:17.09|
EPOCH[650/1000] loss0.008-|Sample:18.36|
[TEST]
{'precision': array([0.01238816]), 'recall': array([0.0301527]), 'ndcg': array([0.02286942])}
EPOCH[651/1000] loss0.008-|Sample:17.40|
EPOCH[652/1000] loss0.008-|Sample:16.51|
EPOCH[653/1000] loss0.008-|Sample:18.43|
EPOCH[654/1000] loss0.008-|Sample:17.34|
EPOCH[655/1000] loss0.008-|Sample:17.67|
EPOCH[656/1000] loss0.008-|Sample:17.28|
EPOCH[657/1000] loss0.008-|Sample:16.70|
EPOCH[658/1000] loss0.008-|Sample:16.46|
EPOCH[659/1000] loss0.008-|Sample:18.79|
EPOCH[660/1000] loss0.008-|Sample:16.46|
[TEST]
{'precision': array([0.01254773]), 'recall': array([0.03040643]), 'ndcg': array([0.02303562])}
EPOCH[661/1000] loss0.008-|Sample:18.14|
EPOCH[662/1000] loss0.008-|Sample:16.15|
EPOCH[663/1000] loss0.008-|Sample:16.18|
EPOCH[664/1000] loss0.008-|Sample:16.36|
EPOCH[665/1000] loss0.008-|Sample:15.14|
EPOCH[666/1000] loss0.008-|Sample:15.22|
EPOCH[667/1000] loss0.008-|Sample:15.18|
EPOCH[668/1000] loss0.008-|Sample:15.62|
EPOCH[669/1000] loss0.008-|Sample:15.36|
EPOCH[670/1000] loss0.008-|Sample:15.20|
[TEST]
{'precision': array([0.01255438]), 'recall': array([0.03060289]), 'ndcg': array([0.02309051])}
EPOCH[671/1000] loss0.008-|Sample:15.22|
EPOCH[672/1000] loss0.008-|Sample:15.36|
EPOCH[673/1000] loss0.008-|Sample:15.48|
EPOCH[674/1000] loss0.008-|Sample:15.15|
EPOCH[675/1000] loss0.008-|Sample:15.57|
EPOCH[676/1000] loss0.008-|Sample:14.97|
EPOCH[677/1000] loss0.008-|Sample:15.73|
EPOCH[678/1000] loss0.008-|Sample:15.75|
EPOCH[679/1000] loss0.008-|Sample:15.62|
EPOCH[680/1000] loss0.008-|Sample:15.03|
[TEST]
{'precision': array([0.01251733]), 'recall': array([0.03045644]), 'ndcg': array([0.02310145])}
EPOCH[681/1000] loss0.008-|Sample:15.70|
EPOCH[682/1000] loss0.008-|Sample:15.12|
EPOCH[683/1000] loss0.008-|Sample:15.92|
EPOCH[684/1000] loss0.008-|Sample:15.03|
EPOCH[685/1000] loss0.008-|Sample:15.28|
EPOCH[686/1000] loss0.008-|Sample:15.20|
EPOCH[687/1000] loss0.008-|Sample:15.47|
EPOCH[688/1000] loss0.008-|Sample:15.20|
EPOCH[689/1000] loss0.008-|Sample:15.51|
EPOCH[690/1000] loss0.008-|Sample:15.31|
[TEST]
{'precision': array([0.0126921]), 'recall': array([0.0309615]), 'ndcg': array([0.0234306])}
EPOCH[691/1000] loss0.008-|Sample:15.14|
EPOCH[692/1000] loss0.008-|Sample:15.20|
EPOCH[693/1000] loss0.008-|Sample:15.29|
EPOCH[694/1000] loss0.008-|Sample:15.34|
EPOCH[695/1000] loss0.008-|Sample:15.29|
EPOCH[696/1000] loss0.008-|Sample:15.84|
EPOCH[697/1000] loss0.008-|Sample:15.45|
EPOCH[698/1000] loss0.008-|Sample:15.50|
EPOCH[699/1000] loss0.008-|Sample:15.14|
EPOCH[700/1000] loss0.008-|Sample:15.26|
[TEST]
{'precision': array([0.01285261]), 'recall': array([0.03135187]), 'ndcg': array([0.02372852])}
EPOCH[701/1000] loss0.008-|Sample:14.98|
EPOCH[702/1000] loss0.008-|Sample:16.46|
EPOCH[703/1000] loss0.008-|Sample:15.18|
EPOCH[704/1000] loss0.007-|Sample:15.47|
EPOCH[705/1000] loss0.008-|Sample:15.75|
EPOCH[706/1000] loss0.008-|Sample:15.09|
EPOCH[707/1000] loss0.008-|Sample:15.15|
EPOCH[708/1000] loss0.008-|Sample:15.90|
EPOCH[709/1000] loss0.008-|Sample:15.34|
EPOCH[710/1000] loss0.007-|Sample:15.22|
[TEST]
{'precision': array([0.01267975]), 'recall': array([0.03092137]), 'ndcg': array([0.0233712])}
EPOCH[711/1000] loss0.008-|Sample:14.90|
EPOCH[712/1000] loss0.008-|Sample:15.07|
EPOCH[713/1000] loss0.008-|Sample:15.45|
EPOCH[714/1000] loss0.007-|Sample:15.06|
EPOCH[715/1000] loss0.008-|Sample:15.82|
EPOCH[716/1000] loss0.007-|Sample:15.07|
EPOCH[717/1000] loss0.008-|Sample:15.84|
EPOCH[718/1000] loss0.008-|Sample:15.43|
EPOCH[719/1000] loss0.008-|Sample:15.14|
EPOCH[720/1000] loss0.008-|Sample:15.12|
[TEST]
{'precision': array([0.01273009]), 'recall': array([0.03090582]), 'ndcg': array([0.02343039])}
EPOCH[721/1000] loss0.007-|Sample:15.84|
EPOCH[722/1000] loss0.008-|Sample:14.95|
EPOCH[723/1000] loss0.008-|Sample:15.72|
EPOCH[724/1000] loss0.007-|Sample:15.06|
EPOCH[725/1000] loss0.008-|Sample:14.97|
EPOCH[726/1000] loss0.008-|Sample:15.17|
EPOCH[727/1000] loss0.008-|Sample:15.26|
EPOCH[728/1000] loss0.008-|Sample:15.70|
EPOCH[729/1000] loss0.008-|Sample:15.64|
EPOCH[730/1000] loss0.007-|Sample:14.92|
[TEST]
{'precision': array([0.01260851]), 'recall': array([0.03083065]), 'ndcg': array([0.02349002])}
EPOCH[731/1000] loss0.008-|Sample:15.09|
EPOCH[732/1000] loss0.008-|Sample:15.14|
EPOCH[733/1000] loss0.008-|Sample:15.68|
EPOCH[734/1000] loss0.008-|Sample:15.53|
EPOCH[735/1000] loss0.008-|Sample:15.28|
EPOCH[736/1000] loss0.008-|Sample:15.92|
EPOCH[737/1000] loss0.008-|Sample:15.64|
EPOCH[738/1000] loss0.007-|Sample:15.59|
EPOCH[739/1000] loss0.008-|Sample:15.20|
EPOCH[740/1000] loss0.007-|Sample:15.04|
[TEST]
{'precision': array([0.01276903]), 'recall': array([0.03138441]), 'ndcg': array([0.02377667])}
EPOCH[741/1000] loss0.007-|Sample:15.06|
EPOCH[742/1000] loss0.007-|Sample:15.43|
EPOCH[743/1000] loss0.008-|Sample:15.56|
EPOCH[744/1000] loss0.008-|Sample:15.56|
EPOCH[745/1000] loss0.007-|Sample:15.03|
EPOCH[746/1000] loss0.007-|Sample:15.61|
EPOCH[747/1000] loss0.008-|Sample:15.28|
EPOCH[748/1000] loss0.008-|Sample:15.12|
EPOCH[749/1000] loss0.008-|Sample:15.09|
EPOCH[750/1000] loss0.007-|Sample:15.42|
[TEST]
{'precision': array([0.01279182]), 'recall': array([0.03129309]), 'ndcg': array([0.0238233])}
EPOCH[751/1000] loss0.007-|Sample:15.04|
EPOCH[752/1000] loss0.007-|Sample:15.15|
EPOCH[753/1000] loss0.007-|Sample:16.34|
EPOCH[754/1000] loss0.007-|Sample:15.70|
EPOCH[755/1000] loss0.007-|Sample:15.87|
EPOCH[756/1000] loss0.007-|Sample:15.25|
EPOCH[757/1000] loss0.008-|Sample:15.12|
EPOCH[758/1000] loss0.007-|Sample:15.42|
EPOCH[759/1000] loss0.008-|Sample:15.45|
EPOCH[760/1000] loss0.007-|Sample:15.39|
[TEST]
{'precision': array([0.01286211]), 'recall': array([0.03142404]), 'ndcg': array([0.02384394])}
EPOCH[761/1000] loss0.007-|Sample:15.22|
EPOCH[762/1000] loss0.007-|Sample:15.18|
EPOCH[763/1000] loss0.007-|Sample:15.07|
EPOCH[764/1000] loss0.008-|Sample:15.18|
EPOCH[765/1000] loss0.007-|Sample:15.32|
EPOCH[766/1000] loss0.008-|Sample:15.23|
EPOCH[767/1000] loss0.007-|Sample:14.95|
EPOCH[768/1000] loss0.007-|Sample:15.14|
EPOCH[769/1000] loss0.007-|Sample:15.53|
EPOCH[770/1000] loss0.007-|Sample:15.43|
[TEST]
{'precision': array([0.01290105]), 'recall': array([0.0315681]), 'ndcg': array([0.02395589])}
EPOCH[771/1000] loss0.007-|Sample:15.20|
EPOCH[772/1000] loss0.007-|Sample:15.06|
EPOCH[773/1000] loss0.008-|Sample:15.25|
EPOCH[774/1000] loss0.007-|Sample:15.23|
EPOCH[775/1000] loss0.008-|Sample:15.89|
EPOCH[776/1000] loss0.008-|Sample:15.11|
EPOCH[777/1000] loss0.007-|Sample:15.25|
EPOCH[778/1000] loss0.008-|Sample:15.50|
EPOCH[779/1000] loss0.007-|Sample:15.07|
EPOCH[780/1000] loss0.007-|Sample:15.75|
[TEST]
{'precision': array([0.01291435]), 'recall': array([0.03154043]), 'ndcg': array([0.02398942])}
EPOCH[781/1000] loss0.007-|Sample:15.67|
EPOCH[782/1000] loss0.007-|Sample:15.11|
EPOCH[783/1000] loss0.008-|Sample:15.76|
EPOCH[784/1000] loss0.007-|Sample:15.09|
EPOCH[785/1000] loss0.007-|Sample:15.15|
EPOCH[786/1000] loss0.007-|Sample:15.15|
EPOCH[787/1000] loss0.007-|Sample:15.15|
EPOCH[788/1000] loss0.007-|Sample:14.98|
EPOCH[789/1000] loss0.007-|Sample:15.45|
EPOCH[790/1000] loss0.007-|Sample:15.15|
[TEST]
{'precision': array([0.01291055]), 'recall': array([0.03155684]), 'ndcg': array([0.02383246])}
EPOCH[791/1000] loss0.007-|Sample:15.25|
EPOCH[792/1000] loss0.007-|Sample:14.98|
EPOCH[793/1000] loss0.007-|Sample:15.81|
EPOCH[794/1000] loss0.007-|Sample:15.37|
EPOCH[795/1000] loss0.007-|Sample:15.87|
EPOCH[796/1000] loss0.007-|Sample:15.00|
EPOCH[797/1000] loss0.007-|Sample:15.76|
EPOCH[798/1000] loss0.007-|Sample:15.39|
EPOCH[799/1000] loss0.007-|Sample:15.23|
EPOCH[800/1000] loss0.007-|Sample:15.22|
[TEST]
{'precision': array([0.0129172]), 'recall': array([0.0315462]), 'ndcg': array([0.02389928])}
EPOCH[801/1000] loss0.008-|Sample:15.00|
EPOCH[802/1000] loss0.007-|Sample:15.18|
EPOCH[803/1000] loss0.008-|Sample:15.68|
EPOCH[804/1000] loss0.007-|Sample:15.42|
EPOCH[805/1000] loss0.007-|Sample:15.06|
EPOCH[806/1000] loss0.007-|Sample:15.15|
EPOCH[807/1000] loss0.007-|Sample:15.56|
EPOCH[808/1000] loss0.007-|Sample:15.03|
EPOCH[809/1000] loss0.007-|Sample:15.03|
EPOCH[810/1000] loss0.007-|Sample:15.23|
[TEST]
{'precision': array([0.01299223]), 'recall': array([0.03188176]), 'ndcg': array([0.02415272])}
EPOCH[811/1000] loss0.007-|Sample:14.79|
EPOCH[812/1000] loss0.007-|Sample:15.70|
EPOCH[813/1000] loss0.007-|Sample:15.01|
EPOCH[814/1000] loss0.007-|Sample:15.92|
EPOCH[815/1000] loss0.007-|Sample:15.57|
EPOCH[816/1000] loss0.007-|Sample:15.28|
EPOCH[817/1000] loss0.007-|Sample:15.00|
EPOCH[818/1000] loss0.007-|Sample:15.18|
EPOCH[819/1000] loss0.007-|Sample:15.54|
EPOCH[820/1000] loss0.007-|Sample:15.03|
[TEST]
{'precision': array([0.01303877]), 'recall': array([0.03188281]), 'ndcg': array([0.02411154])}
EPOCH[821/1000] loss0.007-|Sample:15.17|
EPOCH[822/1000] loss0.007-|Sample:14.98|
EPOCH[823/1000] loss0.007-|Sample:15.09|
EPOCH[824/1000] loss0.007-|Sample:15.23|
EPOCH[825/1000] loss0.007-|Sample:15.40|
EPOCH[826/1000] loss0.007-|Sample:15.15|
EPOCH[827/1000] loss0.007-|Sample:15.50|
EPOCH[828/1000] loss0.007-|Sample:15.12|
EPOCH[829/1000] loss0.007-|Sample:15.76|
EPOCH[830/1000] loss0.007-|Sample:15.29|
[TEST]
{'precision': array([0.0131499]), 'recall': array([0.03224721]), 'ndcg': array([0.02439191])}
EPOCH[831/1000] loss0.007-|Sample:15.00|
EPOCH[832/1000] loss0.007-|Sample:15.76|
EPOCH[833/1000] loss0.007-|Sample:15.34|
EPOCH[834/1000] loss0.007-|Sample:15.76|
EPOCH[835/1000] loss0.007-|Sample:15.54|
EPOCH[836/1000] loss0.007-|Sample:15.23|
EPOCH[837/1000] loss0.007-|Sample:15.22|
EPOCH[838/1000] loss0.007-|Sample:15.50|
EPOCH[839/1000] loss0.007-|Sample:15.56|
EPOCH[840/1000] loss0.007-|Sample:15.17|
[TEST]
{'precision': array([0.01317459]), 'recall': array([0.0323884]), 'ndcg': array([0.02450131])}
EPOCH[841/1000] loss0.007-|Sample:15.23|
EPOCH[842/1000] loss0.007-|Sample:14.95|
EPOCH[843/1000] loss0.007-|Sample:15.97|
EPOCH[844/1000] loss0.007-|Sample:15.73|
EPOCH[845/1000] loss0.007-|Sample:14.97|
EPOCH[846/1000] loss0.007-|Sample:15.47|
EPOCH[847/1000] loss0.007-|Sample:15.26|
EPOCH[848/1000] loss0.007-|Sample:14.81|
EPOCH[849/1000] loss0.007-|Sample:15.18|
EPOCH[850/1000] loss0.007-|Sample:15.57|
[TEST]
{'precision': array([0.01304827]), 'recall': array([0.03193724]), 'ndcg': array([0.02437724])}
EPOCH[851/1000] loss0.007-|Sample:15.11|
EPOCH[852/1000] loss0.007-|Sample:15.43|
EPOCH[853/1000] loss0.007-|Sample:15.62|
EPOCH[854/1000] loss0.007-|Sample:15.48|
EPOCH[855/1000] loss0.007-|Sample:15.59|
EPOCH[856/1000] loss0.007-|Sample:15.48|
EPOCH[857/1000] loss0.007-|Sample:15.15|
EPOCH[858/1000] loss0.007-|Sample:16.31|
EPOCH[859/1000] loss0.007-|Sample:15.17|
EPOCH[860/1000] loss0.007-|Sample:15.57|
[TEST]
{'precision': array([0.0131461]), 'recall': array([0.03222779]), 'ndcg': array([0.02444159])}
EPOCH[861/1000] loss0.007-|Sample:15.67|
EPOCH[862/1000] loss0.007-|Sample:15.20|
EPOCH[863/1000] loss0.007-|Sample:15.61|
EPOCH[864/1000] loss0.007-|Sample:14.89|
EPOCH[865/1000] loss0.007-|Sample:15.12|
EPOCH[866/1000] loss0.007-|Sample:15.11|
EPOCH[867/1000] loss0.007-|Sample:15.01|
EPOCH[868/1000] loss0.007-|Sample:15.23|
EPOCH[869/1000] loss0.007-|Sample:15.34|
EPOCH[870/1000] loss0.007-|Sample:14.92|
[TEST]
{'precision': array([0.01309576]), 'recall': array([0.03188355]), 'ndcg': array([0.0242583])}
EPOCH[871/1000] loss0.007-|Sample:15.76|
EPOCH[872/1000] loss0.007-|Sample:15.03|
EPOCH[873/1000] loss0.007-|Sample:16.14|
EPOCH[874/1000] loss0.007-|Sample:15.57|
EPOCH[875/1000] loss0.007-|Sample:15.22|
EPOCH[876/1000] loss0.007-|Sample:15.06|
EPOCH[877/1000] loss0.007-|Sample:15.32|
EPOCH[878/1000] loss0.007-|Sample:15.92|
EPOCH[879/1000] loss0.007-|Sample:15.07|
EPOCH[880/1000] loss0.007-|Sample:15.62|
[TEST]
{'precision': array([0.01317269]), 'recall': array([0.03220317]), 'ndcg': array([0.02450498])}
EPOCH[881/1000] loss0.007-|Sample:15.89|
EPOCH[882/1000] loss0.007-|Sample:15.17|
EPOCH[883/1000] loss0.007-|Sample:16.20|
EPOCH[884/1000] loss0.007-|Sample:15.07|
EPOCH[885/1000] loss0.007-|Sample:15.42|
EPOCH[886/1000] loss0.007-|Sample:15.53|
EPOCH[887/1000] loss0.007-|Sample:15.40|
EPOCH[888/1000] loss0.007-|Sample:15.12|
EPOCH[889/1000] loss0.007-|Sample:15.29|
EPOCH[890/1000] loss0.007-|Sample:14.95|
[TEST]
{'precision': array([0.01313565]), 'recall': array([0.03221146]), 'ndcg': array([0.02462241])}
EPOCH[891/1000] loss0.007-|Sample:15.45|
EPOCH[892/1000] loss0.007-|Sample:15.73|
EPOCH[893/1000] loss0.007-|Sample:15.64|
EPOCH[894/1000] loss0.007-|Sample:15.28|
EPOCH[895/1000] loss0.007-|Sample:15.11|
EPOCH[896/1000] loss0.007-|Sample:15.67|
EPOCH[897/1000] loss0.007-|Sample:15.17|
EPOCH[898/1000] loss0.007-|Sample:15.20|
EPOCH[899/1000] loss0.007-|Sample:15.76|
EPOCH[900/1000] loss0.007-|Sample:15.28|
[TEST]
{'precision': array([0.01324773]), 'recall': array([0.03243464]), 'ndcg': array([0.02477783])}
EPOCH[901/1000] loss0.007-|Sample:15.72|
EPOCH[902/1000] loss0.007-|Sample:15.23|
EPOCH[903/1000] loss0.007-|Sample:15.17|
EPOCH[904/1000] loss0.007-|Sample:15.45|
EPOCH[905/1000] loss0.007-|Sample:15.17|
EPOCH[906/1000] loss0.007-|Sample:15.04|
EPOCH[907/1000] loss0.007-|Sample:15.28|
EPOCH[908/1000] loss0.007-|Sample:15.03|
EPOCH[909/1000] loss0.007-|Sample:14.98|
EPOCH[910/1000] loss0.007-|Sample:16.43|
[TEST]
{'precision': array([0.01329901]), 'recall': array([0.03265218]), 'ndcg': array([0.02479423])}
EPOCH[911/1000] loss0.007-|Sample:15.64|
EPOCH[912/1000] loss0.007-|Sample:15.59|
EPOCH[913/1000] loss0.007-|Sample:15.20|
EPOCH[914/1000] loss0.007-|Sample:15.11|
EPOCH[915/1000] loss0.007-|Sample:15.65|
EPOCH[916/1000] loss0.007-|Sample:15.25|
EPOCH[917/1000] loss0.007-|Sample:15.31|
EPOCH[918/1000] loss0.007-|Sample:15.48|
EPOCH[919/1000] loss0.007-|Sample:15.01|
EPOCH[920/1000] loss0.007-|Sample:15.01|
[TEST]
{'precision': array([0.01336645]), 'recall': array([0.03271214]), 'ndcg': array([0.0247437])}
EPOCH[921/1000] loss0.007-|Sample:15.20|
EPOCH[922/1000] loss0.007-|Sample:15.11|
EPOCH[923/1000] loss0.007-|Sample:15.61|
EPOCH[924/1000] loss0.007-|Sample:15.14|
EPOCH[925/1000] loss0.007-|Sample:15.40|
EPOCH[926/1000] loss0.007-|Sample:15.07|
EPOCH[927/1000] loss0.007-|Sample:15.84|
EPOCH[928/1000] loss0.007-|Sample:15.50|
EPOCH[929/1000] loss0.007-|Sample:15.62|
EPOCH[930/1000] loss0.007-|Sample:15.04|
[TEST]
{'precision': array([0.0133598]), 'recall': array([0.03264507]), 'ndcg': array([0.02473364])}
EPOCH[931/1000] loss0.007-|Sample:15.40|
EPOCH[932/1000] loss0.007-|Sample:15.29|
EPOCH[933/1000] loss0.007-|Sample:15.31|
EPOCH[934/1000] loss0.007-|Sample:15.04|
EPOCH[935/1000] loss0.007-|Sample:15.78|
EPOCH[936/1000] loss0.007-|Sample:15.18|
EPOCH[937/1000] loss0.007-|Sample:15.15|
EPOCH[938/1000] loss0.007-|Sample:15.11|
EPOCH[939/1000] loss0.007-|Sample:15.42|
EPOCH[940/1000] loss0.007-|Sample:14.93|
[TEST]
{'precision': array([0.01337595]), 'recall': array([0.03270798]), 'ndcg': array([0.02472182])}
EPOCH[941/1000] loss0.007-|Sample:15.40|
EPOCH[942/1000] loss0.007-|Sample:15.81|
EPOCH[943/1000] loss0.007-|Sample:15.57|
EPOCH[944/1000] loss0.007-|Sample:15.12|
EPOCH[945/1000] loss0.007-|Sample:15.00|
EPOCH[946/1000] loss0.007-|Sample:15.36|
EPOCH[947/1000] loss0.007-|Sample:15.17|
EPOCH[948/1000] loss0.007-|Sample:15.07|
EPOCH[949/1000] loss0.007-|Sample:15.45|
EPOCH[950/1000] loss0.007-|Sample:15.65|
[TEST]
{'precision': array([0.01335505]), 'recall': array([0.03262455]), 'ndcg': array([0.02464006])}
EPOCH[951/1000] loss0.007-|Sample:15.75|
EPOCH[952/1000] loss0.007-|Sample:15.09|
EPOCH[953/1000] loss0.007-|Sample:15.18|
EPOCH[954/1000] loss0.007-|Sample:15.04|
EPOCH[955/1000] loss0.007-|Sample:15.53|
EPOCH[956/1000] loss0.007-|Sample:15.17|
EPOCH[957/1000] loss0.007-|Sample:15.04|
EPOCH[958/1000] loss0.007-|Sample:15.23|
EPOCH[959/1000] loss0.007-|Sample:14.95|
EPOCH[960/1000] loss0.007-|Sample:15.32|
[TEST]
{'precision': array([0.01328192]), 'recall': array([0.03246567]), 'ndcg': array([0.02458817])}
EPOCH[961/1000] loss0.007-|Sample:15.73|
EPOCH[962/1000] loss0.007-|Sample:15.18|
EPOCH[963/1000] loss0.007-|Sample:15.31|
EPOCH[964/1000] loss0.007-|Sample:15.68|
EPOCH[965/1000] loss0.007-|Sample:15.17|
EPOCH[966/1000] loss0.007-|Sample:15.25|
EPOCH[967/1000] loss0.007-|Sample:15.37|
EPOCH[968/1000] loss0.007-|Sample:15.04|
EPOCH[969/1000] loss0.007-|Sample:15.98|
EPOCH[970/1000] loss0.007-|Sample:15.20|
[TEST]
{'precision': array([0.01345193]), 'recall': array([0.03290292]), 'ndcg': array([0.02499927])}
EPOCH[971/1000] loss0.007-|Sample:15.39|
EPOCH[972/1000] loss0.007-|Sample:15.31|
EPOCH[973/1000] loss0.007-|Sample:15.61|
EPOCH[974/1000] loss0.007-|Sample:15.22|
EPOCH[975/1000] loss0.007-|Sample:16.17|
EPOCH[976/1000] loss0.007-|Sample:15.25|
EPOCH[977/1000] loss0.007-|Sample:15.78|
EPOCH[978/1000] loss0.007-|Sample:15.07|
EPOCH[979/1000] loss0.007-|Sample:15.17|
EPOCH[980/1000] loss0.007-|Sample:15.29|
[TEST]
{'precision': array([0.01337975]), 'recall': array([0.03279804]), 'ndcg': array([0.02487123])}
EPOCH[981/1000] loss0.007-|Sample:15.54|
EPOCH[982/1000] loss0.007-|Sample:15.06|
EPOCH[983/1000] loss0.007-|Sample:15.70|
EPOCH[984/1000] loss0.007-|Sample:15.72|
EPOCH[985/1000] loss0.007-|Sample:15.18|
EPOCH[986/1000] loss0.007-|Sample:15.26|
EPOCH[987/1000] loss0.007-|Sample:15.48|
EPOCH[988/1000] loss0.007-|Sample:15.86|
EPOCH[989/1000] loss0.007-|Sample:15.56|
EPOCH[990/1000] loss0.007-|Sample:15.37|
[TEST]
{'precision': array([0.01340254]), 'recall': array([0.03271093]), 'ndcg': array([0.02483238])}
EPOCH[991/1000] loss0.007-|Sample:15.17|
EPOCH[992/1000] loss0.007-|Sample:15.40|
EPOCH[993/1000] loss0.007-|Sample:15.23|
EPOCH[994/1000] loss0.007-|Sample:15.51|
EPOCH[995/1000] loss0.007-|Sample:15.28|
EPOCH[996/1000] loss0.007-|Sample:15.68|
EPOCH[997/1000] loss0.007-|Sample:15.39|
EPOCH[998/1000] loss0.007-|Sample:15.40|
EPOCH[999/1000] loss0.007-|Sample:15.14|
EPOCH[1000/1000] loss0.007-|Sample:15.39|

Process finished with exit code 0

model：  lgn  layer：4  6月21日 16：30：35--6月22日 18：20：39  耗时：25：45：04 
D:\ProgramFiles\Anaconda3\envs\image_caption_python36\python.exe D:/workspace/LightGcn/LightGCN-PyTorch-master/code/main.py
Cpp extension not loaded
>>SEED: 2020
loading [../data/amazon-book]
2380730 interactions for training
603382 interactions for testing
amazon-book Sparsity : 0.0006188476640083725
amazon-book is ready to go
===========config================
{'A_n_fold': 100,
 'A_split': False,
 'bigdata': False,
 'bpr_batch_size': 2048,
 'decay': 0.0001,
 'dropout': 0,
 'keep_prob': 0.6,
 'latent_dim_rec': 64,
 'lightGCN_n_layers': 4,
 'lr': 0.001,
 'multicore': 0,
 'pretrain': 0,
 'test_u_batch_size': 100}
cores for test: 6
comment: lgn
tensorboard: 1
LOAD: 0
Weight path: ./checkpoints
Test Topks: [20]
using bpr loss
===========end===================
use NORMAL distribution initilizer
loading adjacency matrix
successfully loaded...
don't split the matrix
lgn is already to go(dropout:0)
load and save to D:\workspace\LightGcn\LightGCN-PyTorch-master\code\checkpoints\lgn-amazon-book-4-64.pth.tar
1624264235.7839296
[TEST]
{'precision': array([0.00012157]), 'recall': array([0.00022079]), 'ndcg': array([0.00017924])}
EPOCH[1/1000] loss0.403-|Sample:12.72|
EPOCH[2/1000] loss0.226-|Sample:13.65|
EPOCH[3/1000] loss0.193-|Sample:13.43|
EPOCH[4/1000] loss0.171-|Sample:13.48|
EPOCH[5/1000] loss0.153-|Sample:13.43|
EPOCH[6/1000] loss0.138-|Sample:13.50|
EPOCH[7/1000] loss0.128-|Sample:13.53|
EPOCH[8/1000] loss0.118-|Sample:13.39|
EPOCH[9/1000] loss0.111-|Sample:13.51|
EPOCH[10/1000] loss0.106-|Sample:13.62|
[TEST]
{'precision': array([0.00970974]), 'recall': array([0.02277167]), 'ndcg': array([0.01758716])}
EPOCH[11/1000] loss0.100-|Sample:13.42|
EPOCH[12/1000] loss0.096-|Sample:13.51|
EPOCH[13/1000] loss0.091-|Sample:13.36|
EPOCH[14/1000] loss0.088-|Sample:13.48|
EPOCH[15/1000] loss0.084-|Sample:13.29|
EPOCH[16/1000] loss0.081-|Sample:13.43|
EPOCH[17/1000] loss0.079-|Sample:13.45|
EPOCH[18/1000] loss0.076-|Sample:13.34|
EPOCH[19/1000] loss0.074-|Sample:13.43|
EPOCH[20/1000] loss0.072-|Sample:13.28|
[TEST]
{'precision': array([0.01120567]), 'recall': array([0.02638712]), 'ndcg': array([0.02045687])}
EPOCH[21/1000] loss0.069-|Sample:13.40|
EPOCH[22/1000] loss0.067-|Sample:13.45|
EPOCH[23/1000] loss0.066-|Sample:13.57|
EPOCH[24/1000] loss0.065-|Sample:13.40|
EPOCH[25/1000] loss0.063-|Sample:13.54|
EPOCH[26/1000] loss0.062-|Sample:13.82|
EPOCH[27/1000] loss0.060-|Sample:13.57|
EPOCH[28/1000] loss0.059-|Sample:13.31|
EPOCH[29/1000] loss0.058-|Sample:13.50|
EPOCH[30/1000] loss0.057-|Sample:13.53|
[TEST]
{'precision': array([0.01205573]), 'recall': array([0.02855556]), 'ndcg': array([0.02206831])}
EPOCH[31/1000] loss0.056-|Sample:13.40|
EPOCH[32/1000] loss0.055-|Sample:13.47|
EPOCH[33/1000] loss0.054-|Sample:13.50|
EPOCH[34/1000] loss0.053-|Sample:13.51|
EPOCH[35/1000] loss0.052-|Sample:13.39|
EPOCH[36/1000] loss0.051-|Sample:13.36|
EPOCH[37/1000] loss0.051-|Sample:13.54|
EPOCH[38/1000] loss0.050-|Sample:13.39|
EPOCH[39/1000] loss0.049-|Sample:13.39|
EPOCH[40/1000] loss0.048-|Sample:13.56|
[TEST]
{'precision': array([0.01265125]), 'recall': array([0.03013917]), 'ndcg': array([0.02323172])}
EPOCH[41/1000] loss0.048-|Sample:13.36|
EPOCH[42/1000] loss0.047-|Sample:13.33|
EPOCH[43/1000] loss0.047-|Sample:13.59|
EPOCH[44/1000] loss0.046-|Sample:13.32|
EPOCH[45/1000] loss0.045-|Sample:13.53|
EPOCH[46/1000] loss0.045-|Sample:13.64|
EPOCH[47/1000] loss0.044-|Sample:13.47|
EPOCH[48/1000] loss0.044-|Sample:13.53|
EPOCH[49/1000] loss0.043-|Sample:13.47|
EPOCH[50/1000] loss0.043-|Sample:13.37|
[TEST]
{'precision': array([0.01321923]), 'recall': array([0.03170904]), 'ndcg': array([0.02422834])}
EPOCH[51/1000] loss0.042-|Sample:13.45|
EPOCH[52/1000] loss0.042-|Sample:13.50|
EPOCH[53/1000] loss0.041-|Sample:13.43|
EPOCH[54/1000] loss0.041-|Sample:13.45|
EPOCH[55/1000] loss0.040-|Sample:13.40|
EPOCH[56/1000] loss0.040-|Sample:13.56|
EPOCH[57/1000] loss0.040-|Sample:13.42|
EPOCH[58/1000] loss0.039-|Sample:13.42|
EPOCH[59/1000] loss0.039-|Sample:13.51|
EPOCH[60/1000] loss0.039-|Sample:13.39|
[TEST]
{'precision': array([0.01350892]), 'recall': array([0.03257201]), 'ndcg': array([0.02492368])}
EPOCH[61/1000] loss0.038-|Sample:13.39|
EPOCH[62/1000] loss0.038-|Sample:13.39|
EPOCH[63/1000] loss0.037-|Sample:13.53|
EPOCH[64/1000] loss0.037-|Sample:13.37|
EPOCH[65/1000] loss0.037-|Sample:13.47|
EPOCH[66/1000] loss0.037-|Sample:13.34|
EPOCH[67/1000] loss0.036-|Sample:13.43|
EPOCH[68/1000] loss0.036-|Sample:13.39|
EPOCH[69/1000] loss0.036-|Sample:13.25|
EPOCH[70/1000] loss0.035-|Sample:13.26|
[TEST]
{'precision': array([0.01376916]), 'recall': array([0.0332932]), 'ndcg': array([0.02562297])}
EPOCH[71/1000] loss0.035-|Sample:13.26|
EPOCH[72/1000] loss0.035-|Sample:13.28|
EPOCH[73/1000] loss0.034-|Sample:13.54|
EPOCH[74/1000] loss0.034-|Sample:13.36|
EPOCH[75/1000] loss0.034-|Sample:13.43|
EPOCH[76/1000] loss0.034-|Sample:13.45|
EPOCH[77/1000] loss0.033-|Sample:13.36|
EPOCH[78/1000] loss0.033-|Sample:13.40|
EPOCH[79/1000] loss0.033-|Sample:13.59|
EPOCH[80/1000] loss0.033-|Sample:13.39|
[TEST]
{'precision': array([0.01396767]), 'recall': array([0.03380911]), 'ndcg': array([0.02604303])}
EPOCH[81/1000] loss0.033-|Sample:13.36|
EPOCH[82/1000] loss0.032-|Sample:13.37|
EPOCH[83/1000] loss0.032-|Sample:13.47|
EPOCH[84/1000] loss0.032-|Sample:13.36|
EPOCH[85/1000] loss0.032-|Sample:13.31|
EPOCH[86/1000] loss0.032-|Sample:13.46|
EPOCH[87/1000] loss0.032-|Sample:13.45|
EPOCH[88/1000] loss0.031-|Sample:13.53|
EPOCH[89/1000] loss0.031-|Sample:13.37|
EPOCH[90/1000] loss0.031-|Sample:13.39|
[TEST]
{'precision': array([0.01433429]), 'recall': array([0.03452848]), 'ndcg': array([0.02665465])}
EPOCH[91/1000] loss0.031-|Sample:13.48|
EPOCH[92/1000] loss0.030-|Sample:13.53|
EPOCH[93/1000] loss0.030-|Sample:13.43|
EPOCH[94/1000] loss0.030-|Sample:13.36|
EPOCH[95/1000] loss0.030-|Sample:13.48|
EPOCH[96/1000] loss0.030-|Sample:13.36|
EPOCH[97/1000] loss0.030-|Sample:13.48|
EPOCH[98/1000] loss0.029-|Sample:13.54|
EPOCH[99/1000] loss0.029-|Sample:13.39|
EPOCH[100/1000] loss0.029-|Sample:13.51|
[TEST]
{'precision': array([0.01457459]), 'recall': array([0.03510253]), 'ndcg': array([0.02710103])}
EPOCH[101/1000] loss0.029-|Sample:13.31|
EPOCH[102/1000] loss0.029-|Sample:13.31|
EPOCH[103/1000] loss0.029-|Sample:13.51|
EPOCH[104/1000] loss0.029-|Sample:13.42|
EPOCH[105/1000] loss0.029-|Sample:13.48|
EPOCH[106/1000] loss0.029-|Sample:13.34|
EPOCH[107/1000] loss0.029-|Sample:13.51|
EPOCH[108/1000] loss0.028-|Sample:13.51|
EPOCH[109/1000] loss0.028-|Sample:13.51|
EPOCH[110/1000] loss0.028-|Sample:13.47|
[TEST]
{'precision': array([0.01477689]), 'recall': array([0.03565359]), 'ndcg': array([0.02748356])}
EPOCH[111/1000] loss0.028-|Sample:13.53|
EPOCH[112/1000] loss0.028-|Sample:13.40|
EPOCH[113/1000] loss0.028-|Sample:13.18|
EPOCH[114/1000] loss0.028-|Sample:13.48|
EPOCH[115/1000] loss0.027-|Sample:13.52|
EPOCH[116/1000] loss0.027-|Sample:13.40|
EPOCH[117/1000] loss0.027-|Sample:13.43|
EPOCH[118/1000] loss0.027-|Sample:13.40|
EPOCH[119/1000] loss0.027-|Sample:13.39|
EPOCH[120/1000] loss0.027-|Sample:13.54|
[TEST]
{'precision': array([0.01498585]), 'recall': array([0.03619744]), 'ndcg': array([0.02787533])}
EPOCH[121/1000] loss0.027-|Sample:13.34|
EPOCH[122/1000] loss0.027-|Sample:13.33|
EPOCH[123/1000] loss0.027-|Sample:13.47|
EPOCH[124/1000] loss0.027-|Sample:13.48|
EPOCH[125/1000] loss0.026-|Sample:13.36|
EPOCH[126/1000] loss0.026-|Sample:13.45|
EPOCH[127/1000] loss0.027-|Sample:13.36|
EPOCH[128/1000] loss0.026-|Sample:13.34|
EPOCH[129/1000] loss0.026-|Sample:13.43|
EPOCH[130/1000] loss0.026-|Sample:13.36|
[TEST]
{'precision': array([0.01512642]), 'recall': array([0.03650224]), 'ndcg': array([0.02815931])}
EPOCH[131/1000] loss0.026-|Sample:13.26|
EPOCH[132/1000] loss0.026-|Sample:13.37|
EPOCH[133/1000] loss0.026-|Sample:13.37|
EPOCH[134/1000] loss0.025-|Sample:13.29|
EPOCH[135/1000] loss0.026-|Sample:13.48|
EPOCH[136/1000] loss0.026-|Sample:13.43|
EPOCH[137/1000] loss0.026-|Sample:13.42|
EPOCH[138/1000] loss0.026-|Sample:13.55|
EPOCH[139/1000] loss0.025-|Sample:13.47|
EPOCH[140/1000] loss0.025-|Sample:13.42|
[TEST]
{'precision': array([0.01525084]), 'recall': array([0.03685201]), 'ndcg': array([0.02835994])}
EPOCH[141/1000] loss0.025-|Sample:13.40|
EPOCH[142/1000] loss0.025-|Sample:13.31|
EPOCH[143/1000] loss0.025-|Sample:13.45|
EPOCH[144/1000] loss0.025-|Sample:13.44|
EPOCH[145/1000] loss0.025-|Sample:13.47|
EPOCH[146/1000] loss0.025-|Sample:13.45|
EPOCH[147/1000] loss0.025-|Sample:13.17|
EPOCH[148/1000] loss0.025-|Sample:13.45|
EPOCH[149/1000] loss0.025-|Sample:13.61|
EPOCH[150/1000] loss0.025-|Sample:13.36|
[TEST]
{'precision': array([0.01540281]), 'recall': array([0.03729831]), 'ndcg': array([0.02864048])}
EPOCH[151/1000] loss0.025-|Sample:13.29|
EPOCH[152/1000] loss0.025-|Sample:13.47|
EPOCH[153/1000] loss0.024-|Sample:13.37|
EPOCH[154/1000] loss0.025-|Sample:13.37|
EPOCH[155/1000] loss0.024-|Sample:13.45|
EPOCH[156/1000] loss0.025-|Sample:13.37|
EPOCH[157/1000] loss0.024-|Sample:13.34|
EPOCH[158/1000] loss0.024-|Sample:13.34|
EPOCH[159/1000] loss0.024-|Sample:13.36|
EPOCH[160/1000] loss0.024-|Sample:13.43|
[TEST]
{'precision': array([0.01558327]), 'recall': array([0.03762714]), 'ndcg': array([0.02894601])}
EPOCH[161/1000] loss0.024-|Sample:13.37|
EPOCH[162/1000] loss0.024-|Sample:13.50|
EPOCH[163/1000] loss0.024-|Sample:13.17|
EPOCH[164/1000] loss0.024-|Sample:13.40|
EPOCH[165/1000] loss0.024-|Sample:13.32|
EPOCH[166/1000] loss0.024-|Sample:13.18|
EPOCH[167/1000] loss0.024-|Sample:13.47|
EPOCH[168/1000] loss0.024-|Sample:13.50|
EPOCH[169/1000] loss0.024-|Sample:13.34|
EPOCH[170/1000] loss0.024-|Sample:13.37|
[TEST]
{'precision': array([0.01555477]), 'recall': array([0.0375302]), 'ndcg': array([0.02902955])}
EPOCH[171/1000] loss0.024-|Sample:13.40|
EPOCH[172/1000] loss0.024-|Sample:13.43|
EPOCH[173/1000] loss0.024-|Sample:13.32|
EPOCH[174/1000] loss0.024-|Sample:13.45|
EPOCH[175/1000] loss0.023-|Sample:13.29|
EPOCH[176/1000] loss0.023-|Sample:13.42|
EPOCH[177/1000] loss0.023-|Sample:13.43|
EPOCH[178/1000] loss0.023-|Sample:13.54|
EPOCH[179/1000] loss0.023-|Sample:13.54|
EPOCH[180/1000] loss0.023-|Sample:13.34|
[TEST]
{'precision': array([0.0156754]), 'recall': array([0.037867]), 'ndcg': array([0.02927121])}
EPOCH[181/1000] loss0.023-|Sample:13.73|
EPOCH[182/1000] loss0.023-|Sample:13.29|
EPOCH[183/1000] loss0.023-|Sample:13.36|
EPOCH[184/1000] loss0.023-|Sample:13.36|
EPOCH[185/1000] loss0.023-|Sample:13.42|
EPOCH[186/1000] loss0.023-|Sample:13.42|
EPOCH[187/1000] loss0.023-|Sample:13.36|
EPOCH[188/1000] loss0.023-|Sample:13.25|
EPOCH[189/1000] loss0.023-|Sample:13.51|
EPOCH[190/1000] loss0.023-|Sample:13.45|
[TEST]
{'precision': array([0.01587391]), 'recall': array([0.03840016]), 'ndcg': array([0.02965543])}
EPOCH[191/1000] loss0.023-|Sample:13.34|
EPOCH[192/1000] loss0.023-|Sample:13.40|
EPOCH[193/1000] loss0.023-|Sample:13.37|
EPOCH[194/1000] loss0.023-|Sample:13.50|
EPOCH[195/1000] loss0.023-|Sample:13.34|
EPOCH[196/1000] loss0.023-|Sample:13.47|
EPOCH[197/1000] loss0.023-|Sample:13.59|
EPOCH[198/1000] loss0.023-|Sample:13.48|
EPOCH[199/1000] loss0.023-|Sample:13.33|
EPOCH[200/1000] loss0.023-|Sample:13.53|
[TEST]
{'precision': array([0.01590335]), 'recall': array([0.03848266]), 'ndcg': array([0.02972692])}
EPOCH[201/1000] loss0.023-|Sample:13.43|
EPOCH[202/1000] loss0.022-|Sample:13.36|
EPOCH[203/1000] loss0.022-|Sample:13.42|
EPOCH[204/1000] loss0.023-|Sample:13.37|
EPOCH[205/1000] loss0.023-|Sample:13.39|
EPOCH[206/1000] loss0.022-|Sample:13.56|
EPOCH[207/1000] loss0.022-|Sample:13.48|
EPOCH[208/1000] loss0.023-|Sample:13.39|
EPOCH[209/1000] loss0.022-|Sample:13.43|
EPOCH[210/1000] loss0.022-|Sample:13.31|
[TEST]
{'precision': array([0.01591095]), 'recall': array([0.03847293]), 'ndcg': array([0.02975748])}
EPOCH[211/1000] loss0.022-|Sample:13.40|
EPOCH[212/1000] loss0.022-|Sample:13.31|
EPOCH[213/1000] loss0.022-|Sample:13.56|
EPOCH[214/1000] loss0.022-|Sample:13.43|
EPOCH[215/1000] loss0.022-|Sample:13.42|
EPOCH[216/1000] loss0.022-|Sample:13.39|
EPOCH[217/1000] loss0.022-|Sample:13.23|
EPOCH[218/1000] loss0.022-|Sample:13.29|
EPOCH[219/1000] loss0.022-|Sample:13.57|
EPOCH[220/1000] loss0.022-|Sample:13.47|
[TEST]
{'precision': array([0.01606861]), 'recall': array([0.03892677]), 'ndcg': array([0.03002597])}
EPOCH[221/1000] loss0.022-|Sample:13.42|
EPOCH[222/1000] loss0.022-|Sample:13.48|
EPOCH[223/1000] loss0.022-|Sample:13.42|
EPOCH[224/1000] loss0.022-|Sample:13.39|
EPOCH[225/1000] loss0.022-|Sample:13.37|
EPOCH[226/1000] loss0.022-|Sample:13.37|
EPOCH[227/1000] loss0.022-|Sample:13.36|
EPOCH[228/1000] loss0.022-|Sample:13.39|
EPOCH[229/1000] loss0.022-|Sample:13.39|
EPOCH[230/1000] loss0.022-|Sample:13.50|
[TEST]
{'precision': array([0.01609331]), 'recall': array([0.03884054]), 'ndcg': array([0.02995135])}
EPOCH[231/1000] loss0.022-|Sample:13.48|
EPOCH[232/1000] loss0.022-|Sample:13.37|
EPOCH[233/1000] loss0.022-|Sample:13.51|
EPOCH[234/1000] loss0.022-|Sample:13.36|
EPOCH[235/1000] loss0.022-|Sample:13.47|
EPOCH[236/1000] loss0.022-|Sample:13.29|
EPOCH[237/1000] loss0.022-|Sample:13.47|
EPOCH[238/1000] loss0.022-|Sample:13.45|
EPOCH[239/1000] loss0.022-|Sample:13.37|
EPOCH[240/1000] loss0.022-|Sample:13.36|
[TEST]
{'precision': array([0.01620253]), 'recall': array([0.03912049]), 'ndcg': array([0.03020269])}
EPOCH[241/1000] loss0.022-|Sample:13.17|
EPOCH[242/1000] loss0.022-|Sample:13.40|
EPOCH[243/1000] loss0.022-|Sample:13.37|
EPOCH[244/1000] loss0.022-|Sample:13.51|
EPOCH[245/1000] loss0.022-|Sample:13.31|
EPOCH[246/1000] loss0.022-|Sample:13.29|
EPOCH[247/1000] loss0.022-|Sample:13.64|
EPOCH[248/1000] loss0.022-|Sample:13.37|
EPOCH[249/1000] loss0.022-|Sample:13.53|
EPOCH[250/1000] loss0.022-|Sample:13.37|
[TEST]
{'precision': array([0.01617404]), 'recall': array([0.03922176]), 'ndcg': array([0.0302201])}
EPOCH[251/1000] loss0.022-|Sample:13.40|
EPOCH[252/1000] loss0.022-|Sample:13.36|
EPOCH[253/1000] loss0.022-|Sample:13.34|
EPOCH[254/1000] loss0.022-|Sample:13.45|
EPOCH[255/1000] loss0.022-|Sample:13.40|
EPOCH[256/1000] loss0.022-|Sample:13.34|
EPOCH[257/1000] loss0.021-|Sample:13.56|
EPOCH[258/1000] loss0.021-|Sample:13.25|
EPOCH[259/1000] loss0.022-|Sample:13.43|
EPOCH[260/1000] loss0.022-|Sample:13.57|
[TEST]
{'precision': array([0.01627757]), 'recall': array([0.03942612]), 'ndcg': array([0.03037605])}
EPOCH[261/1000] loss0.022-|Sample:13.31|
EPOCH[262/1000] loss0.021-|Sample:13.36|
EPOCH[263/1000] loss0.021-|Sample:13.40|
EPOCH[264/1000] loss0.021-|Sample:13.40|
EPOCH[265/1000] loss0.021-|Sample:13.17|
EPOCH[266/1000] loss0.021-|Sample:13.53|
EPOCH[267/1000] loss0.021-|Sample:13.36|
EPOCH[268/1000] loss0.021-|Sample:13.36|
EPOCH[269/1000] loss0.021-|Sample:13.40|
EPOCH[270/1000] loss0.021-|Sample:13.42|
[TEST]
{'precision': array([0.01625097]), 'recall': array([0.03931412]), 'ndcg': array([0.03034377])}
EPOCH[271/1000] loss0.021-|Sample:13.45|
EPOCH[272/1000] loss0.021-|Sample:13.37|
EPOCH[273/1000] loss0.021-|Sample:13.51|
EPOCH[274/1000] loss0.021-|Sample:13.25|
EPOCH[275/1000] loss0.021-|Sample:13.36|
EPOCH[276/1000] loss0.021-|Sample:13.37|
EPOCH[277/1000] loss0.021-|Sample:13.25|
EPOCH[278/1000] loss0.021-|Sample:13.31|
EPOCH[279/1000] loss0.021-|Sample:13.42|
EPOCH[280/1000] loss0.021-|Sample:13.34|
[TEST]
{'precision': array([0.01632031]), 'recall': array([0.03953933]), 'ndcg': array([0.03051269])}
EPOCH[281/1000] loss0.021-|Sample:13.37|
EPOCH[282/1000] loss0.021-|Sample:13.22|
EPOCH[283/1000] loss0.021-|Sample:13.54|
EPOCH[284/1000] loss0.021-|Sample:13.36|
EPOCH[285/1000] loss0.021-|Sample:13.43|
EPOCH[286/1000] loss0.021-|Sample:13.32|
EPOCH[287/1000] loss0.021-|Sample:13.36|
EPOCH[288/1000] loss0.021-|Sample:13.37|
EPOCH[289/1000] loss0.021-|Sample:13.54|
EPOCH[290/1000] loss0.021-|Sample:13.26|
[TEST]
{'precision': array([0.01641149]), 'recall': array([0.03976408]), 'ndcg': array([0.03065128])}
EPOCH[291/1000] loss0.021-|Sample:13.50|
EPOCH[292/1000] loss0.021-|Sample:13.53|
EPOCH[293/1000] loss0.021-|Sample:13.37|
EPOCH[294/1000] loss0.021-|Sample:13.36|
EPOCH[295/1000] loss0.021-|Sample:13.36|
EPOCH[296/1000] loss0.021-|Sample:13.28|
EPOCH[297/1000] loss0.021-|Sample:13.34|
EPOCH[298/1000] loss0.021-|Sample:13.39|
EPOCH[299/1000] loss0.021-|Sample:13.45|
EPOCH[300/1000] loss0.021-|Sample:13.50|
[TEST]
{'precision': array([0.01654826]), 'recall': array([0.04010242]), 'ndcg': array([0.03088504])}
EPOCH[301/1000] loss0.021-|Sample:13.40|
EPOCH[302/1000] loss0.021-|Sample:13.43|
EPOCH[303/1000] loss0.021-|Sample:13.45|
EPOCH[304/1000] loss0.021-|Sample:13.39|
EPOCH[305/1000] loss0.021-|Sample:13.51|
EPOCH[306/1000] loss0.021-|Sample:13.37|
EPOCH[307/1000] loss0.021-|Sample:13.47|
EPOCH[308/1000] loss0.021-|Sample:13.48|
EPOCH[309/1000] loss0.021-|Sample:13.33|
EPOCH[310/1000] loss0.021-|Sample:13.56|
[TEST]
{'precision': array([0.01651692]), 'recall': array([0.03994301]), 'ndcg': array([0.03086333])}
EPOCH[311/1000] loss0.021-|Sample:13.42|
EPOCH[312/1000] loss0.021-|Sample:13.43|
EPOCH[313/1000] loss0.021-|Sample:13.32|
EPOCH[314/1000] loss0.021-|Sample:13.45|
EPOCH[315/1000] loss0.021-|Sample:13.48|
EPOCH[316/1000] loss0.021-|Sample:13.26|
EPOCH[317/1000] loss0.021-|Sample:13.45|
EPOCH[318/1000] loss0.021-|Sample:13.39|
EPOCH[319/1000] loss0.021-|Sample:13.51|
EPOCH[320/1000] loss0.021-|Sample:13.36|
[TEST]
{'precision': array([0.01650837]), 'recall': array([0.0399827]), 'ndcg': array([0.03085025])}
EPOCH[321/1000] loss0.021-|Sample:13.57|
EPOCH[322/1000] loss0.021-|Sample:13.39|
EPOCH[323/1000] loss0.021-|Sample:13.37|
EPOCH[324/1000] loss0.021-|Sample:13.53|
EPOCH[325/1000] loss0.021-|Sample:13.40|
EPOCH[326/1000] loss0.021-|Sample:13.40|
EPOCH[327/1000] loss0.021-|Sample:13.48|
EPOCH[328/1000] loss0.021-|Sample:13.32|
EPOCH[329/1000] loss0.021-|Sample:13.51|
EPOCH[330/1000] loss0.021-|Sample:13.51|
[TEST]
{'precision': array([0.01643523]), 'recall': array([0.03980792]), 'ndcg': array([0.03077867])}
EPOCH[331/1000] loss0.021-|Sample:13.36|
EPOCH[332/1000] loss0.021-|Sample:13.37|
EPOCH[333/1000] loss0.021-|Sample:13.40|
EPOCH[334/1000] loss0.021-|Sample:13.43|
EPOCH[335/1000] loss0.021-|Sample:13.37|
EPOCH[336/1000] loss0.021-|Sample:13.48|
EPOCH[337/1000] loss0.021-|Sample:13.47|
EPOCH[338/1000] loss0.021-|Sample:13.43|
EPOCH[339/1000] loss0.021-|Sample:13.43|
EPOCH[340/1000] loss0.021-|Sample:13.45|
[TEST]
{'precision': array([0.01644758]), 'recall': array([0.03987841]), 'ndcg': array([0.03082423])}
EPOCH[341/1000] loss0.021-|Sample:13.43|
EPOCH[342/1000] loss0.021-|Sample:13.42|
EPOCH[343/1000] loss0.021-|Sample:13.51|
EPOCH[344/1000] loss0.021-|Sample:13.29|
EPOCH[345/1000] loss0.021-|Sample:13.42|
EPOCH[346/1000] loss0.021-|Sample:13.50|
EPOCH[347/1000] loss0.021-|Sample:13.33|
EPOCH[348/1000] loss0.021-|Sample:13.45|
EPOCH[349/1000] loss0.021-|Sample:13.51|
EPOCH[350/1000] loss0.021-|Sample:13.50|
[TEST]
{'precision': array([0.01659385]), 'recall': array([0.04000092]), 'ndcg': array([0.03095874])}
EPOCH[351/1000] loss0.021-|Sample:13.40|
EPOCH[352/1000] loss0.021-|Sample:13.29|
EPOCH[353/1000] loss0.021-|Sample:13.51|
EPOCH[354/1000] loss0.021-|Sample:13.45|
EPOCH[355/1000] loss0.021-|Sample:13.39|
EPOCH[356/1000] loss0.020-|Sample:13.48|
EPOCH[357/1000] loss0.021-|Sample:13.43|
EPOCH[358/1000] loss0.021-|Sample:13.45|
EPOCH[359/1000] loss0.020-|Sample:13.57|
EPOCH[360/1000] loss0.020-|Sample:13.34|
[TEST]
{'precision': array([0.01654636]), 'recall': array([0.03998939]), 'ndcg': array([0.03086162])}
EPOCH[361/1000] loss0.021-|Sample:13.37|
EPOCH[362/1000] loss0.020-|Sample:13.47|
EPOCH[363/1000] loss0.021-|Sample:13.37|
EPOCH[364/1000] loss0.021-|Sample:13.29|
EPOCH[365/1000] loss0.020-|Sample:13.53|
EPOCH[366/1000] loss0.021-|Sample:13.25|
EPOCH[367/1000] loss0.020-|Sample:13.25|
EPOCH[368/1000] loss0.020-|Sample:13.40|
EPOCH[369/1000] loss0.020-|Sample:13.45|
EPOCH[370/1000] loss0.021-|Sample:13.43|
[TEST]
{'precision': array([0.016591]), 'recall': array([0.0400998]), 'ndcg': array([0.03093433])}
EPOCH[371/1000] loss0.020-|Sample:13.29|
EPOCH[372/1000] loss0.021-|Sample:13.36|
EPOCH[373/1000] loss0.021-|Sample:13.26|
EPOCH[374/1000] loss0.021-|Sample:13.43|
EPOCH[375/1000] loss0.021-|Sample:13.45|
EPOCH[376/1000] loss0.020-|Sample:13.25|
EPOCH[377/1000] loss0.020-|Sample:13.40|
EPOCH[378/1000] loss0.020-|Sample:13.36|
EPOCH[379/1000] loss0.020-|Sample:13.25|
EPOCH[380/1000] loss0.020-|Sample:13.40|
[TEST]
{'precision': array([0.01670213]), 'recall': array([0.04031458]), 'ndcg': array([0.03124257])}
EPOCH[381/1000] loss0.020-|Sample:13.28|
EPOCH[382/1000] loss0.021-|Sample:13.29|
EPOCH[383/1000] loss0.020-|Sample:13.32|
EPOCH[384/1000] loss0.020-|Sample:13.45|
EPOCH[385/1000] loss0.020-|Sample:13.34|
EPOCH[386/1000] loss0.020-|Sample:13.29|
EPOCH[387/1000] loss0.020-|Sample:13.50|
EPOCH[388/1000] loss0.020-|Sample:13.45|
EPOCH[389/1000] loss0.020-|Sample:13.72|
EPOCH[390/1000] loss0.020-|Sample:13.36|
[TEST]
{'precision': array([0.01663279]), 'recall': array([0.04024286]), 'ndcg': array([0.03109117])}
EPOCH[391/1000] loss0.020-|Sample:13.50|
EPOCH[392/1000] loss0.020-|Sample:13.40|
EPOCH[393/1000] loss0.020-|Sample:13.32|
EPOCH[394/1000] loss0.020-|Sample:13.56|
EPOCH[395/1000] loss0.020-|Sample:13.51|
EPOCH[396/1000] loss0.020-|Sample:13.40|
EPOCH[397/1000] loss0.020-|Sample:13.61|
EPOCH[398/1000] loss0.020-|Sample:13.36|
EPOCH[399/1000] loss0.020-|Sample:13.54|
EPOCH[400/1000] loss0.020-|Sample:13.50|
[TEST]
{'precision': array([0.01670023]), 'recall': array([0.04031296]), 'ndcg': array([0.03122784])}
EPOCH[401/1000] loss0.020-|Sample:13.37|
EPOCH[402/1000] loss0.020-|Sample:13.40|
EPOCH[403/1000] loss0.020-|Sample:13.51|
EPOCH[404/1000] loss0.020-|Sample:13.50|
EPOCH[405/1000] loss0.020-|Sample:13.34|
EPOCH[406/1000] loss0.020-|Sample:13.48|
EPOCH[407/1000] loss0.020-|Sample:13.52|
EPOCH[408/1000] loss0.020-|Sample:13.32|
EPOCH[409/1000] loss0.020-|Sample:13.42|
EPOCH[410/1000] loss0.020-|Sample:13.45|
[TEST]
{'precision': array([0.0166119]), 'recall': array([0.04012084]), 'ndcg': array([0.0310551])}
EPOCH[411/1000] loss0.020-|Sample:13.48|
EPOCH[412/1000] loss0.020-|Sample:13.47|
EPOCH[413/1000] loss0.020-|Sample:13.40|
EPOCH[414/1000] loss0.020-|Sample:13.33|
EPOCH[415/1000] loss0.020-|Sample:13.50|
EPOCH[416/1000] loss0.020-|Sample:13.53|
EPOCH[417/1000] loss0.020-|Sample:13.34|
EPOCH[418/1000] loss0.020-|Sample:13.54|
EPOCH[419/1000] loss0.020-|Sample:13.43|
EPOCH[420/1000] loss0.020-|Sample:13.50|
[TEST]
{'precision': array([0.01665654]), 'recall': array([0.04017998]), 'ndcg': array([0.03107754])}
EPOCH[421/1000] loss0.020-|Sample:13.39|
EPOCH[422/1000] loss0.020-|Sample:13.22|
EPOCH[423/1000] loss0.020-|Sample:13.47|
EPOCH[424/1000] loss0.020-|Sample:13.43|
EPOCH[425/1000] loss0.020-|Sample:13.34|
EPOCH[426/1000] loss0.020-|Sample:13.37|
EPOCH[427/1000] loss0.020-|Sample:13.25|
EPOCH[428/1000] loss0.020-|Sample:13.42|
EPOCH[429/1000] loss0.020-|Sample:13.53|
EPOCH[430/1000] loss0.020-|Sample:13.47|
[TEST]
{'precision': array([0.01670972]), 'recall': array([0.04035299]), 'ndcg': array([0.03122106])}
EPOCH[431/1000] loss0.020-|Sample:13.34|
EPOCH[432/1000] loss0.020-|Sample:13.51|
EPOCH[433/1000] loss0.020-|Sample:13.34|
EPOCH[434/1000] loss0.020-|Sample:13.32|
EPOCH[435/1000] loss0.020-|Sample:13.40|
EPOCH[436/1000] loss0.020-|Sample:13.42|
EPOCH[437/1000] loss0.020-|Sample:13.25|
EPOCH[438/1000] loss0.020-|Sample:13.40|
EPOCH[439/1000] loss0.020-|Sample:13.34|
EPOCH[440/1000] loss0.020-|Sample:13.51|
[TEST]
{'precision': array([0.01679141]), 'recall': array([0.04062152]), 'ndcg': array([0.03130405])}
EPOCH[441/1000] loss0.020-|Sample:13.37|
EPOCH[442/1000] loss0.020-|Sample:13.47|
EPOCH[443/1000] loss0.020-|Sample:13.37|
EPOCH[444/1000] loss0.020-|Sample:13.42|
EPOCH[445/1000] loss0.020-|Sample:13.54|
EPOCH[446/1000] loss0.020-|Sample:13.36|
EPOCH[447/1000] loss0.020-|Sample:13.47|
EPOCH[448/1000] loss0.020-|Sample:13.51|
EPOCH[449/1000] loss0.020-|Sample:13.42|
EPOCH[450/1000] loss0.020-|Sample:13.56|
[TEST]
{'precision': array([0.01685314]), 'recall': array([0.04073838]), 'ndcg': array([0.03140093])}
EPOCH[451/1000] loss0.020-|Sample:13.34|
EPOCH[452/1000] loss0.020-|Sample:13.48|
EPOCH[453/1000] loss0.020-|Sample:13.29|
EPOCH[454/1000] loss0.020-|Sample:13.51|
EPOCH[455/1000] loss0.020-|Sample:13.42|
EPOCH[456/1000] loss0.020-|Sample:13.39|
EPOCH[457/1000] loss0.020-|Sample:13.62|
EPOCH[458/1000] loss0.020-|Sample:13.34|
EPOCH[459/1000] loss0.020-|Sample:13.59|
EPOCH[460/1000] loss0.020-|Sample:13.34|
[TEST]
{'precision': array([0.01675531]), 'recall': array([0.04045111]), 'ndcg': array([0.03124235])}
EPOCH[461/1000] loss0.020-|Sample:13.40|
EPOCH[462/1000] loss0.020-|Sample:13.36|
EPOCH[463/1000] loss0.020-|Sample:13.36|
EPOCH[464/1000] loss0.020-|Sample:13.42|
EPOCH[465/1000] loss0.020-|Sample:13.48|
EPOCH[466/1000] loss0.020-|Sample:13.33|
EPOCH[467/1000] loss0.020-|Sample:13.48|
EPOCH[468/1000] loss0.020-|Sample:13.23|
EPOCH[469/1000] loss0.020-|Sample:13.50|
EPOCH[470/1000] loss0.020-|Sample:13.54|
[TEST]
{'precision': array([0.01677431]), 'recall': array([0.04050136]), 'ndcg': array([0.03122848])}
EPOCH[471/1000] loss0.020-|Sample:13.40|
EPOCH[472/1000] loss0.020-|Sample:13.45|
EPOCH[473/1000] loss0.020-|Sample:13.45|
EPOCH[474/1000] loss0.020-|Sample:13.47|
EPOCH[475/1000] loss0.020-|Sample:13.33|
EPOCH[476/1000] loss0.020-|Sample:13.62|
EPOCH[477/1000] loss0.020-|Sample:13.45|
EPOCH[478/1000] loss0.020-|Sample:13.48|
EPOCH[479/1000] loss0.020-|Sample:13.37|
EPOCH[480/1000] loss0.020-|Sample:13.62|
[TEST]
{'precision': array([0.01681325]), 'recall': array([0.04061966]), 'ndcg': array([0.03130093])}
EPOCH[481/1000] loss0.020-|Sample:13.36|
EPOCH[482/1000] loss0.020-|Sample:13.45|
EPOCH[483/1000] loss0.020-|Sample:13.42|
EPOCH[484/1000] loss0.020-|Sample:13.33|
EPOCH[485/1000] loss0.020-|Sample:13.42|
EPOCH[486/1000] loss0.020-|Sample:13.20|
EPOCH[487/1000] loss0.020-|Sample:13.23|
EPOCH[488/1000] loss0.020-|Sample:13.39|
EPOCH[489/1000] loss0.020-|Sample:13.37|
EPOCH[490/1000] loss0.020-|Sample:13.40|
[TEST]
{'precision': array([0.01673727]), 'recall': array([0.04043734]), 'ndcg': array([0.03119175])}
EPOCH[491/1000] loss0.020-|Sample:13.39|
EPOCH[492/1000] loss0.020-|Sample:13.51|
EPOCH[493/1000] loss0.020-|Sample:13.43|
EPOCH[494/1000] loss0.020-|Sample:13.22|
EPOCH[495/1000] loss0.020-|Sample:13.42|
EPOCH[496/1000] loss0.020-|Sample:13.34|
EPOCH[497/1000] loss0.020-|Sample:13.39|
EPOCH[498/1000] loss0.020-|Sample:13.36|
EPOCH[499/1000] loss0.020-|Sample:13.32|
EPOCH[500/1000] loss0.020-|Sample:13.32|
[TEST]
{'precision': array([0.01675816]), 'recall': array([0.04043064]), 'ndcg': array([0.0312172])}
EPOCH[501/1000] loss0.020-|Sample:13.50|
EPOCH[502/1000] loss0.020-|Sample:13.39|
EPOCH[503/1000] loss0.020-|Sample:13.42|
EPOCH[504/1000] loss0.020-|Sample:13.51|
EPOCH[505/1000] loss0.020-|Sample:13.47|
EPOCH[506/1000] loss0.020-|Sample:13.37|
EPOCH[507/1000] loss0.020-|Sample:13.45|
EPOCH[508/1000] loss0.020-|Sample:13.47|
EPOCH[509/1000] loss0.020-|Sample:13.45|
EPOCH[510/1000] loss0.020-|Sample:13.40|
[TEST]
{'precision': array([0.01669928]), 'recall': array([0.04040801]), 'ndcg': array([0.03115712])}
EPOCH[511/1000] loss0.020-|Sample:13.51|
EPOCH[512/1000] loss0.020-|Sample:13.37|
EPOCH[513/1000] loss0.020-|Sample:13.36|
EPOCH[514/1000] loss0.020-|Sample:13.54|
EPOCH[515/1000] loss0.020-|Sample:13.45|
EPOCH[516/1000] loss0.020-|Sample:13.31|
EPOCH[517/1000] loss0.020-|Sample:13.47|
EPOCH[518/1000] loss0.020-|Sample:13.26|
EPOCH[519/1000] loss0.020-|Sample:13.39|
EPOCH[520/1000] loss0.020-|Sample:13.51|
[TEST]
{'precision': array([0.01686549]), 'recall': array([0.0408288]), 'ndcg': array([0.03140873])}
EPOCH[521/1000] loss0.020-|Sample:13.51|
EPOCH[522/1000] loss0.020-|Sample:13.40|
EPOCH[523/1000] loss0.020-|Sample:13.63|
EPOCH[524/1000] loss0.020-|Sample:13.54|
EPOCH[525/1000] loss0.020-|Sample:13.29|
EPOCH[526/1000] loss0.020-|Sample:13.57|
EPOCH[527/1000] loss0.020-|Sample:13.40|
EPOCH[528/1000] loss0.020-|Sample:13.42|
EPOCH[529/1000] loss0.020-|Sample:13.48|
EPOCH[530/1000] loss0.020-|Sample:13.54|
[TEST]
{'precision': array([0.0168104]), 'recall': array([0.04057095]), 'ndcg': array([0.03127214])}
EPOCH[531/1000] loss0.020-|Sample:13.36|
EPOCH[532/1000] loss0.020-|Sample:13.51|
EPOCH[533/1000] loss0.020-|Sample:13.53|
EPOCH[534/1000] loss0.020-|Sample:13.31|
EPOCH[535/1000] loss0.020-|Sample:13.57|
EPOCH[536/1000] loss0.020-|Sample:13.37|
EPOCH[537/1000] loss0.020-|Sample:13.26|
EPOCH[538/1000] loss0.020-|Sample:13.42|
EPOCH[539/1000] loss0.020-|Sample:13.42|
EPOCH[540/1000] loss0.020-|Sample:13.56|
[TEST]
{'precision': array([0.01687214]), 'recall': array([0.04084432]), 'ndcg': array([0.03145751])}
EPOCH[541/1000] loss0.020-|Sample:13.29|
EPOCH[542/1000] loss0.020-|Sample:13.42|
EPOCH[543/1000] loss0.020-|Sample:13.26|
EPOCH[544/1000] loss0.020-|Sample:13.40|
EPOCH[545/1000] loss0.020-|Sample:13.62|
EPOCH[546/1000] loss0.020-|Sample:13.31|
EPOCH[547/1000] loss0.020-|Sample:13.31|
EPOCH[548/1000] loss0.020-|Sample:13.28|
EPOCH[549/1000] loss0.020-|Sample:13.31|
EPOCH[550/1000] loss0.020-|Sample:13.37|
[TEST]
{'precision': array([0.01685504]), 'recall': array([0.04077155]), 'ndcg': array([0.03152311])}
EPOCH[551/1000] loss0.020-|Sample:13.54|
EPOCH[552/1000] loss0.020-|Sample:13.28|
EPOCH[553/1000] loss0.020-|Sample:13.45|
EPOCH[554/1000] loss0.020-|Sample:13.36|
EPOCH[555/1000] loss0.020-|Sample:13.25|
EPOCH[556/1000] loss0.020-|Sample:13.31|
EPOCH[557/1000] loss0.020-|Sample:13.42|
EPOCH[558/1000] loss0.020-|Sample:13.45|
EPOCH[559/1000] loss0.020-|Sample:13.50|
EPOCH[560/1000] loss0.020-|Sample:13.29|
[TEST]
{'precision': array([0.01696617]), 'recall': array([0.04109321]), 'ndcg': array([0.03166391])}
EPOCH[561/1000] loss0.020-|Sample:13.39|
EPOCH[562/1000] loss0.020-|Sample:13.36|
EPOCH[563/1000] loss0.020-|Sample:13.45|
EPOCH[564/1000] loss0.020-|Sample:13.32|
EPOCH[565/1000] loss0.020-|Sample:13.43|
EPOCH[566/1000] loss0.020-|Sample:13.31|
EPOCH[567/1000] loss0.020-|Sample:13.48|
EPOCH[568/1000] loss0.020-|Sample:13.20|
EPOCH[569/1000] loss0.020-|Sample:13.54|
EPOCH[570/1000] loss0.020-|Sample:13.42|
[TEST]
{'precision': array([0.01688829]), 'recall': array([0.04099005]), 'ndcg': array([0.03156275])}
EPOCH[571/1000] loss0.020-|Sample:13.31|
EPOCH[572/1000] loss0.020-|Sample:13.25|
EPOCH[573/1000] loss0.020-|Sample:13.34|
EPOCH[574/1000] loss0.020-|Sample:13.51|
EPOCH[575/1000] loss0.020-|Sample:13.34|
EPOCH[576/1000] loss0.020-|Sample:13.36|
EPOCH[577/1000] loss0.020-|Sample:13.33|
EPOCH[578/1000] loss0.020-|Sample:13.28|
EPOCH[579/1000] loss0.020-|Sample:13.22|
EPOCH[580/1000] loss0.020-|Sample:13.31|
[TEST]
{'precision': array([0.01690348]), 'recall': array([0.0410466]), 'ndcg': array([0.03155115])}
EPOCH[581/1000] loss0.020-|Sample:13.59|
EPOCH[582/1000] loss0.020-|Sample:13.39|
EPOCH[583/1000] loss0.020-|Sample:13.43|
EPOCH[584/1000] loss0.020-|Sample:13.28|
EPOCH[585/1000] loss0.020-|Sample:13.50|
EPOCH[586/1000] loss0.020-|Sample:13.28|
EPOCH[587/1000] loss0.020-|Sample:13.37|
EPOCH[588/1000] loss0.020-|Sample:13.50|
EPOCH[589/1000] loss0.020-|Sample:13.45|
EPOCH[590/1000] loss0.020-|Sample:13.47|
[TEST]
{'precision': array([0.01686074]), 'recall': array([0.04087201]), 'ndcg': array([0.03158454])}
EPOCH[591/1000] loss0.020-|Sample:13.36|
EPOCH[592/1000] loss0.020-|Sample:13.45|
EPOCH[593/1000] loss0.020-|Sample:13.36|
EPOCH[594/1000] loss0.020-|Sample:13.25|
EPOCH[595/1000] loss0.020-|Sample:13.54|
EPOCH[596/1000] loss0.020-|Sample:13.40|
EPOCH[597/1000] loss0.020-|Sample:13.43|
EPOCH[598/1000] loss0.020-|Sample:13.36|
EPOCH[599/1000] loss0.020-|Sample:13.26|
EPOCH[600/1000] loss0.020-|Sample:13.43|
[TEST]
{'precision': array([0.01686739]), 'recall': array([0.04092833]), 'ndcg': array([0.03155424])}
EPOCH[601/1000] loss0.020-|Sample:13.47|
EPOCH[602/1000] loss0.020-|Sample:13.47|
EPOCH[603/1000] loss0.020-|Sample:13.36|
EPOCH[604/1000] loss0.020-|Sample:13.37|
EPOCH[605/1000] loss0.020-|Sample:13.37|
EPOCH[606/1000] loss0.020-|Sample:13.29|
EPOCH[607/1000] loss0.020-|Sample:13.54|
EPOCH[608/1000] loss0.020-|Sample:13.47|
EPOCH[609/1000] loss0.020-|Sample:13.51|
EPOCH[610/1000] loss0.020-|Sample:13.43|
[TEST]
{'precision': array([0.01688829]), 'recall': array([0.04093546]), 'ndcg': array([0.03156023])}
EPOCH[611/1000] loss0.020-|Sample:13.47|
EPOCH[612/1000] loss0.020-|Sample:13.33|
EPOCH[613/1000] loss0.020-|Sample:13.26|
EPOCH[614/1000] loss0.020-|Sample:13.36|
EPOCH[615/1000] loss0.020-|Sample:13.36|
EPOCH[616/1000] loss0.020-|Sample:13.22|
EPOCH[617/1000] loss0.020-|Sample:13.37|
EPOCH[618/1000] loss0.020-|Sample:13.31|
EPOCH[619/1000] loss0.020-|Sample:13.33|
EPOCH[620/1000] loss0.020-|Sample:13.62|
[TEST]
{'precision': array([0.0168066]), 'recall': array([0.04079511]), 'ndcg': array([0.03140563])}
EPOCH[621/1000] loss0.020-|Sample:13.34|
EPOCH[622/1000] loss0.020-|Sample:13.39|
EPOCH[623/1000] loss0.020-|Sample:13.42|
EPOCH[624/1000] loss0.020-|Sample:13.37|
EPOCH[625/1000] loss0.020-|Sample:13.32|
EPOCH[626/1000] loss0.020-|Sample:13.54|
EPOCH[627/1000] loss0.020-|Sample:13.45|
EPOCH[628/1000] loss0.020-|Sample:13.33|
EPOCH[629/1000] loss0.020-|Sample:13.34|
EPOCH[630/1000] loss0.020-|Sample:13.53|
[TEST]
{'precision': array([0.01684649]), 'recall': array([0.04079947]), 'ndcg': array([0.03144699])}
EPOCH[631/1000] loss0.020-|Sample:13.61|
EPOCH[632/1000] loss0.020-|Sample:13.37|
EPOCH[633/1000] loss0.020-|Sample:13.54|
EPOCH[634/1000] loss0.020-|Sample:13.29|
EPOCH[635/1000] loss0.020-|Sample:13.50|
EPOCH[636/1000] loss0.020-|Sample:13.26|
EPOCH[637/1000] loss0.020-|Sample:13.23|
EPOCH[638/1000] loss0.020-|Sample:13.39|
EPOCH[639/1000] loss0.020-|Sample:13.42|
EPOCH[640/1000] loss0.020-|Sample:13.33|
[TEST]
{'precision': array([0.01681895]), 'recall': array([0.04077943]), 'ndcg': array([0.03152845])}
EPOCH[641/1000] loss0.020-|Sample:13.37|
EPOCH[642/1000] loss0.020-|Sample:13.48|
EPOCH[643/1000] loss0.020-|Sample:13.39|
EPOCH[644/1000] loss0.020-|Sample:13.18|
EPOCH[645/1000] loss0.020-|Sample:13.53|
EPOCH[646/1000] loss0.020-|Sample:13.42|
EPOCH[647/1000] loss0.020-|Sample:13.42|
EPOCH[648/1000] loss0.020-|Sample:13.34|
EPOCH[649/1000] loss0.020-|Sample:13.34|
EPOCH[650/1000] loss0.020-|Sample:13.43|
[TEST]
{'precision': array([0.0168047]), 'recall': array([0.04071663]), 'ndcg': array([0.03144964])}
EPOCH[651/1000] loss0.020-|Sample:13.36|
EPOCH[652/1000] loss0.020-|Sample:13.20|
EPOCH[653/1000] loss0.020-|Sample:13.45|
EPOCH[654/1000] loss0.020-|Sample:13.54|
EPOCH[655/1000] loss0.020-|Sample:13.25|
EPOCH[656/1000] loss0.020-|Sample:13.56|
EPOCH[657/1000] loss0.020-|Sample:13.25|
EPOCH[658/1000] loss0.020-|Sample:13.47|
EPOCH[659/1000] loss0.020-|Sample:13.54|
EPOCH[660/1000] loss0.020-|Sample:13.23|
[TEST]
{'precision': array([0.01685314]), 'recall': array([0.04081456]), 'ndcg': array([0.03149272])}
EPOCH[661/1000] loss0.020-|Sample:13.53|
EPOCH[662/1000] loss0.020-|Sample:13.36|
EPOCH[663/1000] loss0.020-|Sample:13.34|
EPOCH[664/1000] loss0.020-|Sample:13.51|
EPOCH[665/1000] loss0.020-|Sample:13.26|
EPOCH[666/1000] loss0.020-|Sample:13.42|
EPOCH[667/1000] loss0.020-|Sample:13.48|
EPOCH[668/1000] loss0.020-|Sample:13.34|
EPOCH[669/1000] loss0.020-|Sample:13.45|
EPOCH[670/1000] loss0.020-|Sample:13.36|
[TEST]
{'precision': array([0.01684554]), 'recall': array([0.04080802]), 'ndcg': array([0.03144571])}
EPOCH[671/1000] loss0.020-|Sample:13.36|
EPOCH[672/1000] loss0.020-|Sample:13.28|
EPOCH[673/1000] loss0.020-|Sample:13.39|
EPOCH[674/1000] loss0.020-|Sample:13.51|
EPOCH[675/1000] loss0.020-|Sample:13.36|
EPOCH[676/1000] loss0.020-|Sample:13.39|
EPOCH[677/1000] loss0.020-|Sample:13.57|
EPOCH[678/1000] loss0.020-|Sample:13.54|
EPOCH[679/1000] loss0.020-|Sample:13.31|
EPOCH[680/1000] loss0.020-|Sample:13.37|
[TEST]
{'precision': array([0.01677811]), 'recall': array([0.04063638]), 'ndcg': array([0.03146987])}
EPOCH[681/1000] loss0.020-|Sample:13.42|
EPOCH[682/1000] loss0.020-|Sample:13.45|
EPOCH[683/1000] loss0.020-|Sample:13.53|
EPOCH[684/1000] loss0.020-|Sample:13.65|
EPOCH[685/1000] loss0.020-|Sample:13.34|
EPOCH[686/1000] loss0.020-|Sample:13.48|
EPOCH[687/1000] loss0.020-|Sample:13.54|
EPOCH[688/1000] loss0.020-|Sample:13.34|
EPOCH[689/1000] loss0.020-|Sample:13.65|
EPOCH[690/1000] loss0.020-|Sample:13.45|
[TEST]
{'precision': array([0.01689018]), 'recall': array([0.0408548]), 'ndcg': array([0.03160089])}
EPOCH[691/1000] loss0.020-|Sample:13.36|
EPOCH[692/1000] loss0.020-|Sample:13.51|
EPOCH[693/1000] loss0.020-|Sample:13.43|
EPOCH[694/1000] loss0.020-|Sample:13.42|
EPOCH[695/1000] loss0.020-|Sample:13.45|
EPOCH[696/1000] loss0.020-|Sample:13.53|
EPOCH[697/1000] loss0.020-|Sample:13.25|
EPOCH[698/1000] loss0.020-|Sample:13.50|
EPOCH[699/1000] loss0.020-|Sample:13.36|
EPOCH[700/1000] loss0.020-|Sample:13.43|
[TEST]
{'precision': array([0.01695952]), 'recall': array([0.041033]), 'ndcg': array([0.03171411])}
EPOCH[701/1000] loss0.020-|Sample:13.59|
EPOCH[702/1000] loss0.020-|Sample:13.28|
EPOCH[703/1000] loss0.020-|Sample:13.47|
EPOCH[704/1000] loss0.020-|Sample:13.47|
EPOCH[705/1000] loss0.020-|Sample:13.43|
EPOCH[706/1000] loss0.020-|Sample:13.50|
EPOCH[707/1000] loss0.020-|Sample:13.62|
EPOCH[708/1000] loss0.020-|Sample:13.51|
EPOCH[709/1000] loss0.020-|Sample:13.34|
EPOCH[710/1000] loss0.020-|Sample:13.34|
[TEST]
{'precision': array([0.01692153]), 'recall': array([0.0409944]), 'ndcg': array([0.03156112])}
EPOCH[711/1000] loss0.020-|Sample:13.50|
EPOCH[712/1000] loss0.020-|Sample:13.39|
EPOCH[713/1000] loss0.020-|Sample:13.57|
EPOCH[714/1000] loss0.020-|Sample:13.54|
EPOCH[715/1000] loss0.020-|Sample:13.34|
EPOCH[716/1000] loss0.020-|Sample:13.50|
EPOCH[717/1000] loss0.020-|Sample:13.53|
EPOCH[718/1000] loss0.020-|Sample:13.34|
EPOCH[719/1000] loss0.020-|Sample:13.54|
EPOCH[720/1000] loss0.020-|Sample:13.36|
[TEST]
{'precision': array([0.01687214]), 'recall': array([0.04092762]), 'ndcg': array([0.03153302])}
EPOCH[721/1000] loss0.020-|Sample:13.34|
EPOCH[722/1000] loss0.020-|Sample:13.28|
EPOCH[723/1000] loss0.020-|Sample:13.43|
EPOCH[724/1000] loss0.020-|Sample:13.37|
EPOCH[725/1000] loss0.020-|Sample:13.47|
EPOCH[726/1000] loss0.020-|Sample:13.64|
EPOCH[727/1000] loss0.020-|Sample:13.37|
EPOCH[728/1000] loss0.020-|Sample:13.59|
EPOCH[729/1000] loss0.020-|Sample:13.43|
EPOCH[730/1000] loss0.020-|Sample:13.48|
[TEST]
{'precision': array([0.01684934]), 'recall': array([0.04076001]), 'ndcg': array([0.03146562])}
EPOCH[731/1000] loss0.020-|Sample:13.59|
EPOCH[732/1000] loss0.020-|Sample:13.36|
EPOCH[733/1000] loss0.020-|Sample:13.51|
EPOCH[734/1000] loss0.020-|Sample:13.47|
EPOCH[735/1000] loss0.020-|Sample:13.53|
EPOCH[736/1000] loss0.020-|Sample:13.57|
EPOCH[737/1000] loss0.020-|Sample:13.51|
EPOCH[738/1000] loss0.020-|Sample:13.43|
EPOCH[739/1000] loss0.020-|Sample:13.43|
EPOCH[740/1000] loss0.020-|Sample:13.45|
[TEST]
{'precision': array([0.01700226]), 'recall': array([0.04125323]), 'ndcg': array([0.03171438])}
EPOCH[741/1000] loss0.020-|Sample:13.51|
EPOCH[742/1000] loss0.020-|Sample:13.34|
EPOCH[743/1000] loss0.020-|Sample:13.47|
EPOCH[744/1000] loss0.020-|Sample:13.54|
EPOCH[745/1000] loss0.020-|Sample:13.29|
EPOCH[746/1000] loss0.020-|Sample:13.48|
EPOCH[747/1000] loss0.020-|Sample:13.64|
EPOCH[748/1000] loss0.020-|Sample:13.43|
EPOCH[749/1000] loss0.020-|Sample:13.59|
EPOCH[750/1000] loss0.020-|Sample:13.33|
[TEST]
{'precision': array([0.01695192]), 'recall': array([0.04116862]), 'ndcg': array([0.03168852])}
EPOCH[751/1000] loss0.020-|Sample:13.48|
EPOCH[752/1000] loss0.020-|Sample:13.43|
EPOCH[753/1000] loss0.020-|Sample:13.56|
EPOCH[754/1000] loss0.020-|Sample:13.39|
EPOCH[755/1000] loss0.020-|Sample:13.53|
EPOCH[756/1000] loss0.020-|Sample:13.53|
EPOCH[757/1000] loss0.020-|Sample:13.32|
EPOCH[758/1000] loss0.020-|Sample:13.28|
EPOCH[759/1000] loss0.020-|Sample:13.20|
EPOCH[760/1000] loss0.020-|Sample:13.47|
[TEST]
{'precision': array([0.01695667]), 'recall': array([0.04105569]), 'ndcg': array([0.03165591])}
EPOCH[761/1000] loss0.020-|Sample:13.42|
EPOCH[762/1000] loss0.020-|Sample:13.37|
EPOCH[763/1000] loss0.020-|Sample:13.50|
EPOCH[764/1000] loss0.020-|Sample:13.43|
EPOCH[765/1000] loss0.020-|Sample:13.45|
EPOCH[766/1000] loss0.020-|Sample:13.42|
EPOCH[767/1000] loss0.020-|Sample:13.45|
EPOCH[768/1000] loss0.020-|Sample:13.50|
EPOCH[769/1000] loss0.020-|Sample:13.43|
EPOCH[770/1000] loss0.020-|Sample:13.43|
[TEST]
{'precision': array([0.01695952]), 'recall': array([0.04100191]), 'ndcg': array([0.03168694])}
EPOCH[771/1000] loss0.020-|Sample:13.57|
EPOCH[772/1000] loss0.020-|Sample:13.43|
EPOCH[773/1000] loss0.020-|Sample:13.70|
EPOCH[774/1000] loss0.020-|Sample:13.51|
EPOCH[775/1000] loss0.020-|Sample:13.34|
EPOCH[776/1000] loss0.020-|Sample:13.54|
EPOCH[777/1000] loss0.020-|Sample:13.61|
EPOCH[778/1000] loss0.020-|Sample:13.28|
EPOCH[779/1000] loss0.020-|Sample:13.59|
EPOCH[780/1000] loss0.020-|Sample:13.45|
[TEST]
{'precision': array([0.01688449]), 'recall': array([0.04097691]), 'ndcg': array([0.03158435])}
EPOCH[781/1000] loss0.020-|Sample:13.43|
EPOCH[782/1000] loss0.020-|Sample:13.43|
EPOCH[783/1000] loss0.020-|Sample:13.53|
EPOCH[784/1000] loss0.020-|Sample:13.42|
EPOCH[785/1000] loss0.020-|Sample:13.54|
EPOCH[786/1000] loss0.020-|Sample:13.47|
EPOCH[787/1000] loss0.020-|Sample:13.36|
EPOCH[788/1000] loss0.020-|Sample:13.59|
EPOCH[789/1000] loss0.020-|Sample:13.48|
EPOCH[790/1000] loss0.020-|Sample:13.37|
[TEST]
{'precision': array([0.01691678]), 'recall': array([0.04098609]), 'ndcg': array([0.0315708])}
EPOCH[791/1000] loss0.020-|Sample:13.54|
EPOCH[792/1000] loss0.020-|Sample:13.20|
EPOCH[793/1000] loss0.020-|Sample:13.47|
EPOCH[794/1000] loss0.020-|Sample:13.53|
EPOCH[795/1000] loss0.020-|Sample:13.36|
EPOCH[796/1000] loss0.020-|Sample:13.48|
EPOCH[797/1000] loss0.020-|Sample:13.32|
EPOCH[798/1000] loss0.020-|Sample:13.43|
EPOCH[799/1000] loss0.020-|Sample:13.28|
EPOCH[800/1000] loss0.020-|Sample:13.54|
[TEST]
{'precision': array([0.01691868]), 'recall': array([0.04111544]), 'ndcg': array([0.03170768])}
EPOCH[801/1000] loss0.020-|Sample:13.43|
EPOCH[802/1000] loss0.020-|Sample:13.42|
EPOCH[803/1000] loss0.020-|Sample:13.70|
EPOCH[804/1000] loss0.020-|Sample:13.51|
EPOCH[805/1000] loss0.020-|Sample:13.39|
EPOCH[806/1000] loss0.020-|Sample:13.45|
EPOCH[807/1000] loss0.020-|Sample:13.59|
EPOCH[808/1000] loss0.020-|Sample:13.22|
EPOCH[809/1000] loss0.020-|Sample:13.67|
EPOCH[810/1000] loss0.020-|Sample:13.31|
[TEST]
{'precision': array([0.01692723]), 'recall': array([0.04113174]), 'ndcg': array([0.03168971])}
EPOCH[811/1000] loss0.020-|Sample:13.54|
EPOCH[812/1000] loss0.020-|Sample:13.50|
EPOCH[813/1000] loss0.020-|Sample:13.51|
EPOCH[814/1000] loss0.020-|Sample:13.40|
EPOCH[815/1000] loss0.020-|Sample:13.42|
EPOCH[816/1000] loss0.020-|Sample:13.51|
EPOCH[817/1000] loss0.020-|Sample:13.25|
EPOCH[818/1000] loss0.020-|Sample:13.56|
EPOCH[819/1000] loss0.020-|Sample:13.28|
EPOCH[820/1000] loss0.020-|Sample:13.29|
[TEST]
{'precision': array([0.01693577]), 'recall': array([0.04118535]), 'ndcg': array([0.03170291])}
EPOCH[821/1000] loss0.020-|Sample:13.39|
EPOCH[822/1000] loss0.020-|Sample:13.32|
EPOCH[823/1000] loss0.020-|Sample:13.48|
EPOCH[824/1000] loss0.020-|Sample:13.43|
EPOCH[825/1000] loss0.020-|Sample:13.28|
EPOCH[826/1000] loss0.020-|Sample:13.31|
EPOCH[827/1000] loss0.020-|Sample:13.25|
EPOCH[828/1000] loss0.020-|Sample:13.36|
EPOCH[829/1000] loss0.020-|Sample:13.32|
EPOCH[830/1000] loss0.020-|Sample:13.37|
[TEST]
{'precision': array([0.01699181]), 'recall': array([0.0410434]), 'ndcg': array([0.03175721])}
EPOCH[831/1000] loss0.020-|Sample:13.64|
EPOCH[832/1000] loss0.020-|Sample:13.25|
EPOCH[833/1000] loss0.020-|Sample:13.47|
EPOCH[834/1000] loss0.020-|Sample:13.48|
EPOCH[835/1000] loss0.020-|Sample:13.33|
EPOCH[836/1000] loss0.020-|Sample:13.50|
EPOCH[837/1000] loss0.020-|Sample:13.54|
EPOCH[838/1000] loss0.020-|Sample:13.29|
EPOCH[839/1000] loss0.020-|Sample:14.43|
EPOCH[840/1000] loss0.020-|Sample:13.36|
[TEST]
{'precision': array([0.01693577]), 'recall': array([0.04105186]), 'ndcg': array([0.03166057])}
EPOCH[841/1000] loss0.020-|Sample:13.47|
EPOCH[842/1000] loss0.020-|Sample:13.40|
EPOCH[843/1000] loss0.020-|Sample:13.45|
EPOCH[844/1000] loss0.020-|Sample:13.26|
EPOCH[845/1000] loss0.020-|Sample:13.50|
EPOCH[846/1000] loss0.020-|Sample:13.40|
EPOCH[847/1000] loss0.020-|Sample:13.31|
EPOCH[848/1000] loss0.020-|Sample:13.48|
EPOCH[849/1000] loss0.020-|Sample:13.29|
EPOCH[850/1000] loss0.020-|Sample:13.40|
[TEST]
{'precision': array([0.01686644]), 'recall': array([0.04087324]), 'ndcg': array([0.03159494])}
EPOCH[851/1000] loss0.020-|Sample:13.48|
EPOCH[852/1000] loss0.020-|Sample:13.43|
EPOCH[853/1000] loss0.020-|Sample:13.53|
EPOCH[854/1000] loss0.020-|Sample:13.28|
EPOCH[855/1000] loss0.020-|Sample:13.32|
EPOCH[856/1000] loss0.020-|Sample:13.40|
EPOCH[857/1000] loss0.020-|Sample:13.50|
EPOCH[858/1000] loss0.020-|Sample:13.36|
EPOCH[859/1000] loss0.020-|Sample:13.36|
EPOCH[860/1000] loss0.020-|Sample:13.50|
[TEST]
{'precision': array([0.01692248]), 'recall': array([0.04101933]), 'ndcg': array([0.03167394])}
EPOCH[861/1000] loss0.020-|Sample:13.53|
EPOCH[862/1000] loss0.020-|Sample:13.26|
EPOCH[863/1000] loss0.020-|Sample:13.51|
EPOCH[864/1000] loss0.020-|Sample:13.54|
EPOCH[865/1000] loss0.020-|Sample:13.36|
EPOCH[866/1000] loss0.020-|Sample:13.45|
EPOCH[867/1000] loss0.020-|Sample:13.51|
EPOCH[868/1000] loss0.020-|Sample:13.37|
EPOCH[869/1000] loss0.020-|Sample:13.59|
EPOCH[870/1000] loss0.020-|Sample:13.34|
[TEST]
{'precision': array([0.01695762]), 'recall': array([0.04110282]), 'ndcg': array([0.03168122])}
EPOCH[871/1000] loss0.020-|Sample:13.47|
EPOCH[872/1000] loss0.020-|Sample:13.47|
EPOCH[873/1000] loss0.020-|Sample:13.56|
EPOCH[874/1000] loss0.020-|Sample:13.26|
EPOCH[875/1000] loss0.020-|Sample:13.50|
EPOCH[876/1000] loss0.020-|Sample:13.50|
EPOCH[877/1000] loss0.020-|Sample:13.50|
EPOCH[878/1000] loss0.020-|Sample:13.45|
EPOCH[879/1000] loss0.020-|Sample:13.54|
EPOCH[880/1000] loss0.020-|Sample:13.45|
[TEST]
{'precision': array([0.01691773]), 'recall': array([0.04102284]), 'ndcg': array([0.03158031])}
EPOCH[881/1000] loss0.020-|Sample:13.54|
EPOCH[882/1000] loss0.020-|Sample:13.26|
EPOCH[883/1000] loss0.020-|Sample:13.67|
EPOCH[884/1000] loss0.020-|Sample:13.50|
EPOCH[885/1000] loss0.020-|Sample:13.39|
EPOCH[886/1000] loss0.020-|Sample:13.53|
EPOCH[887/1000] loss0.020-|Sample:13.45|
EPOCH[888/1000] loss0.020-|Sample:13.54|
EPOCH[889/1000] loss0.020-|Sample:13.31|
EPOCH[890/1000] loss0.020-|Sample:13.54|
[TEST]
{'precision': array([0.01692153]), 'recall': array([0.04104984]), 'ndcg': array([0.03157906])}
EPOCH[891/1000] loss0.020-|Sample:13.48|
EPOCH[892/1000] loss0.020-|Sample:13.28|
EPOCH[893/1000] loss0.020-|Sample:13.45|
EPOCH[894/1000] loss0.020-|Sample:13.51|
EPOCH[895/1000] loss0.020-|Sample:13.36|
EPOCH[896/1000] loss0.020-|Sample:13.47|
EPOCH[897/1000] loss0.020-|Sample:13.56|
EPOCH[898/1000] loss0.020-|Sample:13.25|
EPOCH[899/1000] loss0.020-|Sample:13.53|
EPOCH[900/1000] loss0.020-|Sample:13.23|
[TEST]
{'precision': array([0.01691678]), 'recall': array([0.04110765]), 'ndcg': array([0.03166327])}
EPOCH[901/1000] loss0.020-|Sample:13.36|
EPOCH[902/1000] loss0.020-|Sample:13.42|
EPOCH[903/1000] loss0.020-|Sample:13.48|
EPOCH[904/1000] loss0.020-|Sample:13.28|
EPOCH[905/1000] loss0.020-|Sample:13.48|
EPOCH[906/1000] loss0.020-|Sample:13.51|
EPOCH[907/1000] loss0.020-|Sample:13.29|
EPOCH[908/1000] loss0.020-|Sample:13.45|
EPOCH[909/1000] loss0.020-|Sample:13.28|
EPOCH[910/1000] loss0.020-|Sample:13.48|
[TEST]
{'precision': array([0.01693767]), 'recall': array([0.04104319]), 'ndcg': array([0.03158685])}
EPOCH[911/1000] loss0.020-|Sample:13.56|
EPOCH[912/1000] loss0.020-|Sample:13.31|
EPOCH[913/1000] loss0.020-|Sample:13.51|
EPOCH[914/1000] loss0.020-|Sample:13.32|
EPOCH[915/1000] loss0.019-|Sample:13.53|
EPOCH[916/1000] loss0.020-|Sample:13.22|
EPOCH[917/1000] loss0.020-|Sample:13.54|
EPOCH[918/1000] loss0.020-|Sample:13.34|
EPOCH[919/1000] loss0.020-|Sample:13.25|
EPOCH[920/1000] loss0.020-|Sample:13.48|
[TEST]
{'precision': array([0.01698516]), 'recall': array([0.04117482]), 'ndcg': array([0.03165176])}
EPOCH[921/1000] loss0.020-|Sample:13.37|
EPOCH[922/1000] loss0.020-|Sample:13.22|
EPOCH[923/1000] loss0.020-|Sample:13.54|
EPOCH[924/1000] loss0.020-|Sample:13.31|
EPOCH[925/1000] loss0.020-|Sample:13.40|
EPOCH[926/1000] loss0.020-|Sample:13.23|
EPOCH[927/1000] loss0.020-|Sample:13.48|
EPOCH[928/1000] loss0.020-|Sample:13.32|
EPOCH[929/1000] loss0.020-|Sample:13.53|
EPOCH[930/1000] loss0.020-|Sample:13.32|
[TEST]
{'precision': array([0.01692248]), 'recall': array([0.0409622]), 'ndcg': array([0.03156103])}
EPOCH[931/1000] loss0.020-|Sample:13.50|
EPOCH[932/1000] loss0.020-|Sample:13.39|
EPOCH[933/1000] loss0.020-|Sample:13.45|
EPOCH[934/1000] loss0.020-|Sample:13.53|
EPOCH[935/1000] loss0.020-|Sample:13.34|
EPOCH[936/1000] loss0.020-|Sample:13.39|
EPOCH[937/1000] loss0.020-|Sample:13.54|
EPOCH[938/1000] loss0.020-|Sample:13.28|
EPOCH[939/1000] loss0.020-|Sample:13.50|
EPOCH[940/1000] loss0.020-|Sample:13.34|
[TEST]
{'precision': array([0.01703075]), 'recall': array([0.04123377]), 'ndcg': array([0.03180753])}
EPOCH[941/1000] loss0.020-|Sample:13.36|
EPOCH[942/1000] loss0.020-|Sample:13.50|
EPOCH[943/1000] loss0.020-|Sample:13.43|
EPOCH[944/1000] loss0.020-|Sample:13.37|
EPOCH[945/1000] loss0.020-|Sample:13.59|
EPOCH[946/1000] loss0.020-|Sample:13.36|
EPOCH[947/1000] loss0.020-|Sample:13.51|
EPOCH[948/1000] loss0.020-|Sample:13.51|
EPOCH[949/1000] loss0.020-|Sample:13.48|
EPOCH[950/1000] loss0.020-|Sample:13.34|
[TEST]
{'precision': array([0.0170469]), 'recall': array([0.04115033]), 'ndcg': array([0.0316916])}
EPOCH[951/1000] loss0.020-|Sample:13.51|
EPOCH[952/1000] loss0.020-|Sample:13.22|
EPOCH[953/1000] loss0.020-|Sample:13.48|
EPOCH[954/1000] loss0.020-|Sample:13.40|
EPOCH[955/1000] loss0.020-|Sample:13.56|
EPOCH[956/1000] loss0.020-|Sample:13.34|
EPOCH[957/1000] loss0.020-|Sample:13.48|
EPOCH[958/1000] loss0.020-|Sample:13.18|
EPOCH[959/1000] loss0.020-|Sample:13.47|
EPOCH[960/1000] loss0.020-|Sample:13.43|
[TEST]
{'precision': array([0.01714758]), 'recall': array([0.04147272]), 'ndcg': array([0.03192445])}
EPOCH[961/1000] loss0.020-|Sample:13.31|
EPOCH[962/1000] loss0.020-|Sample:13.42|
EPOCH[963/1000] loss0.020-|Sample:13.59|
EPOCH[964/1000] loss0.020-|Sample:13.42|
EPOCH[965/1000] loss0.020-|Sample:13.51|
EPOCH[966/1000] loss0.020-|Sample:13.54|
EPOCH[967/1000] loss0.020-|Sample:13.28|
EPOCH[968/1000] loss0.020-|Sample:13.40|
EPOCH[969/1000] loss0.020-|Sample:13.22|
EPOCH[970/1000] loss0.020-|Sample:13.45|
[TEST]
{'precision': array([0.0170317]), 'recall': array([0.04126571]), 'ndcg': array([0.03178401])}
EPOCH[971/1000] loss0.020-|Sample:13.51|
EPOCH[972/1000] loss0.020-|Sample:13.28|
EPOCH[973/1000] loss0.020-|Sample:13.51|
EPOCH[974/1000] loss0.019-|Sample:13.36|
EPOCH[975/1000] loss0.020-|Sample:13.43|
EPOCH[976/1000] loss0.020-|Sample:13.20|
EPOCH[977/1000] loss0.020-|Sample:13.33|
EPOCH[978/1000] loss0.020-|Sample:13.37|
EPOCH[979/1000] loss0.020-|Sample:13.34|
EPOCH[980/1000] loss0.020-|Sample:13.37|
[TEST]
{'precision': array([0.01700131]), 'recall': array([0.04117274]), 'ndcg': array([0.0317181])}
EPOCH[981/1000] loss0.020-|Sample:13.29|
EPOCH[982/1000] loss0.020-|Sample:13.22|
EPOCH[983/1000] loss0.020-|Sample:13.51|
EPOCH[984/1000] loss0.020-|Sample:13.48|
EPOCH[985/1000] loss0.020-|Sample:13.33|
EPOCH[986/1000] loss0.020-|Sample:13.54|
EPOCH[987/1000] loss0.020-|Sample:13.33|
EPOCH[988/1000] loss0.020-|Sample:13.25|
EPOCH[989/1000] loss0.020-|Sample:13.37|
EPOCH[990/1000] loss0.020-|Sample:13.28|
[TEST]
{'precision': array([0.0170393]), 'recall': array([0.04128304]), 'ndcg': array([0.0317317])}
EPOCH[991/1000] loss0.020-|Sample:13.32|
EPOCH[992/1000] loss0.020-|Sample:13.34|
EPOCH[993/1000] loss0.019-|Sample:13.26|
EPOCH[994/1000] loss0.020-|Sample:13.33|
EPOCH[995/1000] loss0.020-|Sample:13.64|
EPOCH[996/1000] loss0.020-|Sample:13.25|
EPOCH[997/1000] loss0.020-|Sample:13.37|
EPOCH[998/1000] loss0.020-|Sample:13.42|
EPOCH[999/1000] loss0.020-|Sample:13.23|
EPOCH[1000/1000] loss0.020-|Sample:13.42|
1624357239.8522391

Process finished with exit code 0


lgcn-v1:
{'name': 'LGCNDataset', 'path': 'data/amazon-book', 'device': device(type='cuda'), 'val_ratio': 0.1}
init dataset LGCNDataset
{'name': 'LightGCN', 'embedding_size': 64, 'n_layers': 3, 'dropout': 0.5, 'device': device(type='cuda'), 'dataset': <dataset.LGCNDataset object at 0x7f97a37eb310>}
{'name': 'BPRTrainer', 'optimizer': 'Adam', 'lr': 0.001, 'l2_reg': 5e-05, 'n_epochs': 1500, 'batch_size': 2048, 'dataloader_num_workers': 6, 'test_batch_size': 512, 'topks': [20, 100], 'device': device(type='cuda'), 'dataset': <dataset.LGCNDataset object at 0x7f97a37eb310>, 'model': LightGCN(
  (embedding): Embedding(144242, 64)
)}
Epoch 0/1500, Loss: 0.355548, Time: 327.532s
Test result. Precision: 0.630%@20, 0.449%@100, Recall: 1.338%@20, 4.697%@100, NDCG: 1.069%@20, 2.228%@100, Time: 18.780s
Save model to checkpoints/LightGCN_BPRTrainer_LGCNDataset_1.069.pth
Epoch 1/1500, Loss: 0.211556, Time: 332.564s
Test result. Precision: 0.739%@20, 0.514%@100, Recall: 1.597%@20, 5.397%@100, NDCG: 1.268%@20, 2.579%@100, Time: 18.512s
Save model to checkpoints/LightGCN_BPRTrainer_LGCNDataset_1.268.pth
Epoch 2/1500, Loss: 0.179985, Time: 327.709s
Test result. Precision: 0.828%@20, 0.570%@100, Recall: 1.813%@20, 6.001%@100, NDCG: 1.434%@20, 2.875%@100, Time: 19.229s
Save model to checkpoints/LightGCN_BPRTrainer_LGCNDataset_1.434.pth
Epoch 3/1500, Loss: 0.157521, Time: 328.842s
Test result. Precision: 0.886%@20, 0.611%@100, Recall: 1.953%@20, 6.465%@100, NDCG: 1.551%@20, 3.103%@100, Time: 19.525s
Save model to checkpoints/LightGCN_BPRTrainer_LGCNDataset_1.551.pth
Epoch 4/1500, Loss: 0.142185, Time: 326.708s
Test result. Precision: 0.932%@20, 0.645%@100, Recall: 2.063%@20, 6.852%@100, NDCG: 1.641%@20, 3.287%@100, Time: 19.918s
Save model to checkpoints/LightGCN_BPRTrainer_LGCNDataset_1.641.pth
Epoch 5/1500, Loss: 0.131193, Time: 330.108s
Test result. Precision: 0.966%@20, 0.669%@100, Recall: 2.145%@20, 7.112%@100, NDCG: 1.718%@20, 3.427%@100, Time: 19.289s
Save model to checkpoints/LightGCN_BPRTrainer_LGCNDataset_1.718.pth
Epoch 6/1500, Loss: 0.122838, Time: 320.960s
Test result. Precision: 0.998%@20, 0.690%@100, Recall: 2.227%@20, 7.360%@100, NDCG: 1.780%@20, 3.547%@100, Time: 19.937s
Save model to checkpoints/LightGCN_BPRTrainer_LGCNDataset_1.780.pth
Epoch 7/1500, Loss: 0.115568, Time: 327.069s
Test result. Precision: 1.033%@20, 0.710%@100, Recall: 2.305%@20, 7.585%@100, NDCG: 1.841%@20, 3.657%@100, Time: 20.465s
Save model to checkpoints/LightGCN_BPRTrainer_LGCNDataset_1.841.pth
Epoch 8/1500, Loss: 0.109523, Time: 329.097s
Test result. Precision: 1.063%@20, 0.727%@100, Recall: 2.369%@20, 7.769%@100, NDCG: 1.893%@20, 3.750%@100, Time: 18.977s
Save model to checkpoints/LightGCN_BPRTrainer_LGCNDataset_1.893.pth
Epoch 9/1500, Loss: 0.104600, Time: 327.977s
Test result. Precision: 1.085%@20, 0.744%@100, Recall: 2.424%@20, 7.956%@100, NDCG: 1.936%@20, 3.838%@100, Time: 19.204s
Save model to checkpoints/LightGCN_BPRTrainer_LGCNDataset_1.936.pth
Epoch 10/1500, Loss: 0.100345, Time: 329.734s
Test result. Precision: 1.107%@20, 0.756%@100, Recall: 2.473%@20, 8.089%@100, NDCG: 1.973%@20, 3.905%@100, Time: 19.027s
Save model to checkpoints/LightGCN_BPRTrainer_LGCNDataset_1.973.pth
Epoch 11/1500, Loss: 0.096042, Time: 324.906s
Test result. Precision: 1.127%@20, 0.771%@100, Recall: 2.520%@20, 8.249%@100, NDCG: 2.012%@20, 3.982%@100, Time: 18.960s
Save model to checkpoints/LightGCN_BPRTrainer_LGCNDataset_2.012.pth
Epoch 12/1500, Loss: 0.092545, Time: 328.119s
Test result. Precision: 1.148%@20, 0.783%@100, Recall: 2.568%@20, 8.394%@100, NDCG: 2.054%@20, 4.053%@100, Time: 18.946s
Save model to checkpoints/LightGCN_BPRTrainer_LGCNDataset_2.054.pth
Epoch 13/1500, Loss: 0.089160, Time: 355.187s
Test result. Precision: 1.166%@20, 0.794%@100, Recall: 2.605%@20, 8.522%@100, NDCG: 2.087%@20, 4.117%@100, Time: 27.503s
Save model to checkpoints/LightGCN_BPRTrainer_LGCNDataset_2.087.pth
Epoch 14/1500, Loss: 0.086229, Time: 407.286s
Test result. Precision: 1.182%@20, 0.804%@100, Recall: 2.644%@20, 8.633%@100, NDCG: 2.118%@20, 4.172%@100, Time: 23.041s
Save model to checkpoints/LightGCN_BPRTrainer_LGCNDataset_2.118.pth
Epoch 15/1500, Loss: 0.083571, Time: 331.572s
Test result. Precision: 1.197%@20, 0.815%@100, Recall: 2.676%@20, 8.748%@100, NDCG: 2.144%@20, 4.226%@100, Time: 19.260s
Save model to checkpoints/LightGCN_BPRTrainer_LGCNDataset_2.144.pth
Epoch 16/1500, Loss: 0.081017, Time: 335.645s
Test result. Precision: 1.207%@20, 0.825%@100, Recall: 2.700%@20, 8.850%@100, NDCG: 2.165%@20, 4.276%@100, Time: 19.515s
Save model to checkpoints/LightGCN_BPRTrainer_LGCNDataset_2.165.pth
Epoch 17/1500, Loss: 0.079161, Time: 330.176s
Test result. Precision: 1.216%@20, 0.832%@100, Recall: 2.719%@20, 8.936%@100, NDCG: 2.179%@20, 4.314%@100, Time: 19.696s
Save model to checkpoints/LightGCN_BPRTrainer_LGCNDataset_2.179.pth
Epoch 18/1500, Loss: 0.076789, Time: 331.392s
Test result. Precision: 1.226%@20, 0.840%@100, Recall: 2.749%@20, 9.033%@100, NDCG: 2.203%@20, 4.361%@100, Time: 19.220s
Save model to checkpoints/LightGCN_BPRTrainer_LGCNDataset_2.203.pth
Epoch 19/1500, Loss: 0.075420, Time: 327.319s
Test result. Precision: 1.233%@20, 0.847%@100, Recall: 2.773%@20, 9.115%@100, NDCG: 2.219%@20, 4.399%@100, Time: 19.220s
Save model to checkpoints/LightGCN_BPRTrainer_LGCNDataset_2.219.pth
Epoch 20/1500, Loss: 0.073240, Time: 324.076s
Test result. Precision: 1.245%@20, 0.856%@100, Recall: 2.798%@20, 9.224%@100, NDCG: 2.238%@20, 4.445%@100, Time: 18.401s
Save model to checkpoints/LightGCN_BPRTrainer_LGCNDataset_2.238.pth
Epoch 21/1500, Loss: 0.071406, Time: 330.787s
Test result. Precision: 1.249%@20, 0.861%@100, Recall: 2.816%@20, 9.296%@100, NDCG: 2.249%@20, 4.477%@100, Time: 18.818s
Save model to checkpoints/LightGCN_BPRTrainer_LGCNDataset_2.249.pth
Epoch 22/1500, Loss: 0.070011, Time: 322.810s
Test result. Precision: 1.259%@20, 0.868%@100, Recall: 2.842%@20, 9.375%@100, NDCG: 2.271%@20, 4.517%@100, Time: 19.651s
Save model to checkpoints/LightGCN_BPRTrainer_LGCNDataset_2.271.pth
Epoch 23/1500, Loss: 0.068440, Time: 329.779s
Test result. Precision: 1.269%@20, 0.872%@100, Recall: 2.875%@20, 9.447%@100, NDCG: 2.293%@20, 4.549%@100, Time: 19.143s
Save model to checkpoints/LightGCN_BPRTrainer_LGCNDataset_2.293.pth
Epoch 24/1500, Loss: 0.067260, Time: 325.299s
Test result. Precision: 1.281%@20, 0.880%@100, Recall: 2.905%@20, 9.534%@100, NDCG: 2.315%@20, 4.591%@100, Time: 19.070s
Save model to checkpoints/LightGCN_BPRTrainer_LGCNDataset_2.315.pth
Epoch 25/1500, Loss: 0.065880, Time: 324.497s
Test result. Precision: 1.284%@20, 0.884%@100, Recall: 2.923%@20, 9.585%@100, NDCG: 2.328%@20, 4.616%@100, Time: 19.195s
Save model to checkpoints/LightGCN_BPRTrainer_LGCNDataset_2.328.pth
Epoch 26/1500, Loss: 0.064371, Time: 326.123s
Test result. Precision: 1.293%@20, 0.889%@100, Recall: 2.944%@20, 9.643%@100, NDCG: 2.343%@20, 4.645%@100, Time: 19.172s
Save model to checkpoints/LightGCN_BPRTrainer_LGCNDataset_2.343.pth
Epoch 27/1500, Loss: 0.063031, Time: 327.542s
Test result. Precision: 1.306%@20, 0.892%@100, Recall: 2.980%@20, 9.688%@100, NDCG: 2.364%@20, 4.670%@100, Time: 19.385s
Save model to checkpoints/LightGCN_BPRTrainer_LGCNDataset_2.364.pth
Epoch 28/1500, Loss: 0.062158, Time: 325.871s
Test result. Precision: 1.313%@20, 0.897%@100, Recall: 3.001%@20, 9.755%@100, NDCG: 2.380%@20, 4.701%@100, Time: 19.238s
Save model to checkpoints/LightGCN_BPRTrainer_LGCNDataset_2.380.pth
Epoch 29/1500, Loss: 0.061260, Time: 327.994s
Test result. Precision: 1.320%@20, 0.901%@100, Recall: 3.022%@20, 9.814%@100, NDCG: 2.394%@20, 4.728%@100, Time: 19.285s
Save model to checkpoints/LightGCN_BPRTrainer_LGCNDataset_2.394.pth
Epoch 30/1500, Loss: 0.059891, Time: 324.014s
Test result. Precision: 1.329%@20, 0.903%@100, Recall: 3.044%@20, 9.851%@100, NDCG: 2.411%@20, 4.749%@100, Time: 19.931s
Save model to checkpoints/LightGCN_BPRTrainer_LGCNDataset_2.411.pth
Epoch 31/1500, Loss: 0.058964, Time: 322.566s
Test result. Precision: 1.336%@20, 0.907%@100, Recall: 3.060%@20, 9.912%@100, NDCG: 2.421%@20, 4.773%@100, Time: 18.308s
Save model to checkpoints/LightGCN_BPRTrainer_LGCNDataset_2.421.pth
Epoch 32/1500, Loss: 0.058281, Time: 326.544s
Test result. Precision: 1.341%@20, 0.911%@100, Recall: 3.081%@20, 9.969%@100, NDCG: 2.434%@20, 4.800%@100, Time: 18.919s
Save model to checkpoints/LightGCN_BPRTrainer_LGCNDataset_2.434.pth
Epoch 33/1500, Loss: 0.057135, Time: 330.062s
Test result. Precision: 1.347%@20, 0.914%@100, Recall: 3.101%@20, 10.014%@100, NDCG: 2.441%@20, 4.815%@100, Time: 19.485s
Save model to checkpoints/LightGCN_BPRTrainer_LGCNDataset_2.441.pth
Epoch 34/1500, Loss: 0.056462, Time: 324.228s
Test result. Precision: 1.357%@20, 0.920%@100, Recall: 3.126%@20, 10.084%@100, NDCG: 2.463%@20, 4.854%@100, Time: 18.990s
Save model to checkpoints/LightGCN_BPRTrainer_LGCNDataset_2.463.pth
Epoch 35/1500, Loss: 0.054908, Time: 329.461s
Test result. Precision: 1.359%@20, 0.922%@100, Recall: 3.132%@20, 10.121%@100, NDCG: 2.471%@20, 4.872%@100, Time: 18.285s
Save model to checkpoints/LightGCN_BPRTrainer_LGCNDataset_2.471.pth
Epoch 36/1500, Loss: 0.054660, Time: 327.781s
Test result. Precision: 1.365%@20, 0.924%@100, Recall: 3.150%@20, 10.141%@100, NDCG: 2.483%@20, 4.886%@100, Time: 17.725s
Save model to checkpoints/LightGCN_BPRTrainer_LGCNDataset_2.483.pth
Epoch 37/1500, Loss: 0.053929, Time: 332.906s
Test result. Precision: 1.376%@20, 0.929%@100, Recall: 3.176%@20, 10.202%@100, NDCG: 2.498%@20, 4.912%@100, Time: 18.106s
Save model to checkpoints/LightGCN_BPRTrainer_LGCNDataset_2.498.pth
Epoch 38/1500, Loss: 0.053190, Time: 324.839s
Test result. Precision: 1.376%@20, 0.931%@100, Recall: 3.180%@20, 10.240%@100, NDCG: 2.503%@20, 4.928%@100, Time: 18.808s
Save model to checkpoints/LightGCN_BPRTrainer_LGCNDataset_2.503.pth
Epoch 39/1500, Loss: 0.052756, Time: 330.225s
Test result. Precision: 1.376%@20, 0.932%@100, Recall: 3.183%@20, 10.265%@100, NDCG: 2.506%@20, 4.940%@100, Time: 17.404s
Save model to checkpoints/LightGCN_BPRTrainer_LGCNDataset_2.506.pth
Epoch 40/1500, Loss: 0.051798, Time: 330.676s
Test result. Precision: 1.383%@20, 0.936%@100, Recall: 3.205%@20, 10.309%@100, NDCG: 2.521%@20, 4.962%@100, Time: 17.712s
Save model to checkpoints/LightGCN_BPRTrainer_LGCNDataset_2.521.pth
Epoch 41/1500, Loss: 0.051275, Time: 326.681s
Test result. Precision: 1.383%@20, 0.939%@100, Recall: 3.211%@20, 10.358%@100, NDCG: 2.525%@20, 4.981%@100, Time: 18.585s
Save model to checkpoints/LightGCN_BPRTrainer_LGCNDataset_2.525.pth
Epoch 42/1500, Loss: 0.050689, Time: 329.009s
Test result. Precision: 1.386%@20, 0.939%@100, Recall: 3.226%@20, 10.372%@100, NDCG: 2.533%@20, 4.989%@100, Time: 19.096s
Save model to checkpoints/LightGCN_BPRTrainer_LGCNDataset_2.533.pth
Epoch 43/1500, Loss: 0.049968, Time: 327.231s
Test result. Precision: 1.388%@20, 0.941%@100, Recall: 3.234%@20, 10.392%@100, NDCG: 2.539%@20, 5.000%@100, Time: 19.508s
Save model to checkpoints/LightGCN_BPRTrainer_LGCNDataset_2.539.pth
Epoch 44/1500, Loss: 0.049449, Time: 330.608s
Test result. Precision: 1.395%@20, 0.946%@100, Recall: 3.244%@20, 10.457%@100, NDCG: 2.549%@20, 5.026%@100, Time: 19.775s
Save model to checkpoints/LightGCN_BPRTrainer_LGCNDataset_2.549.pth
Epoch 45/1500, Loss: 0.048535, Time: 323.760s
Test result. Precision: 1.401%@20, 0.949%@100, Recall: 3.260%@20, 10.500%@100, NDCG: 2.561%@20, 5.048%@100, Time: 19.377s
Save model to checkpoints/LightGCN_BPRTrainer_LGCNDataset_2.561.pth
Epoch 46/1500, Loss: 0.048507, Time: 322.794s
Test result. Precision: 1.405%@20, 0.951%@100, Recall: 3.271%@20, 10.527%@100, NDCG: 2.567%@20, 5.059%@100, Time: 19.875s
Save model to checkpoints/LightGCN_BPRTrainer_LGCNDataset_2.567.pth
Epoch 47/1500, Loss: 0.047587, Time: 322.657s
Test result. Precision: 1.406%@20, 0.951%@100, Recall: 3.273%@20, 10.546%@100, NDCG: 2.567%@20, 5.064%@100, Time: 19.794s
Save model to checkpoints/LightGCN_BPRTrainer_LGCNDataset_2.567.pth
Epoch 48/1500, Loss: 0.047421, Time: 325.916s
Test result. Precision: 1.410%@20, 0.954%@100, Recall: 3.285%@20, 10.580%@100, NDCG: 2.574%@20, 5.079%@100, Time: 19.247s
Save model to checkpoints/LightGCN_BPRTrainer_LGCNDataset_2.574.pth
Epoch 49/1500, Loss: 0.046768, Time: 326.354s
Test result. Precision: 1.415%@20, 0.956%@100, Recall: 3.298%@20, 10.621%@100, NDCG: 2.587%@20, 5.100%@100, Time: 18.856s
Save model to checkpoints/LightGCN_BPRTrainer_LGCNDataset_2.587.pth
Epoch 50/1500, Loss: 0.046209, Time: 328.231s
Test result. Precision: 1.420%@20, 0.958%@100, Recall: 3.314%@20, 10.654%@100, NDCG: 2.602%@20, 5.120%@100, Time: 19.240s
Save model to checkpoints/LightGCN_BPRTrainer_LGCNDataset_2.602.pth
Epoch 51/1500, Loss: 0.045735, Time: 323.921s
Test result. Precision: 1.423%@20, 0.959%@100, Recall: 3.325%@20, 10.679%@100, NDCG: 2.611%@20, 5.134%@100, Time: 19.310s
Save model to checkpoints/LightGCN_BPRTrainer_LGCNDataset_2.611.pth
Epoch 52/1500, Loss: 0.045474, Time: 327.666s
Test result. Precision: 1.426%@20, 0.961%@100, Recall: 3.326%@20, 10.695%@100, NDCG: 2.613%@20, 5.139%@100, Time: 19.547s
Save model to checkpoints/LightGCN_BPRTrainer_LGCNDataset_2.613.pth
Epoch 53/1500, Loss: 0.045139, Time: 323.144s
Test result. Precision: 1.428%@20, 0.962%@100, Recall: 3.336%@20, 10.730%@100, NDCG: 2.618%@20, 5.153%@100, Time: 19.905s
Save model to checkpoints/LightGCN_BPRTrainer_LGCNDataset_2.618.pth
Epoch 54/1500, Loss: 0.044408, Time: 328.310s
Test result. Precision: 1.429%@20, 0.965%@100, Recall: 3.338%@20, 10.773%@100, NDCG: 2.622%@20, 5.171%@100, Time: 19.374s
Save model to checkpoints/LightGCN_BPRTrainer_LGCNDataset_2.622.pth
Epoch 55/1500, Loss: 0.044026, Time: 328.974s
Test result. Precision: 1.433%@20, 0.967%@100, Recall: 3.351%@20, 10.789%@100, NDCG: 2.626%@20, 5.177%@100, Time: 19.274s
Save model to checkpoints/LightGCN_BPRTrainer_LGCNDataset_2.626.pth
Epoch 56/1500, Loss: 0.043622, Time: 330.905s
Test result. Precision: 1.438%@20, 0.968%@100, Recall: 3.362%@20, 10.802%@100, NDCG: 2.637%@20, 5.189%@100, Time: 19.133s
Save model to checkpoints/LightGCN_BPRTrainer_LGCNDataset_2.637.pth
Epoch 57/1500, Loss: 0.043255, Time: 321.587s
Test result. Precision: 1.439%@20, 0.970%@100, Recall: 3.363%@20, 10.821%@100, NDCG: 2.639%@20, 5.198%@100, Time: 19.280s
Save model to checkpoints/LightGCN_BPRTrainer_LGCNDataset_2.639.pth
Epoch 58/1500, Loss: 0.042734, Time: 323.817s
Test result. Precision: 1.443%@20, 0.972%@100, Recall: 3.374%@20, 10.845%@100, NDCG: 2.646%@20, 5.209%@100, Time: 18.628s
Save model to checkpoints/LightGCN_BPRTrainer_LGCNDataset_2.646.pth
Epoch 59/1500, Loss: 0.042632, Time: 319.476s
Test result. Precision: 1.450%@20, 0.976%@100, Recall: 3.394%@20, 10.894%@100, NDCG: 2.657%@20, 5.228%@100, Time: 20.567s
Save model to checkpoints/LightGCN_BPRTrainer_LGCNDataset_2.657.pth
Epoch 60/1500, Loss: 0.041996, Time: 323.272s
Test result. Precision: 1.450%@20, 0.977%@100, Recall: 3.398%@20, 10.919%@100, NDCG: 2.659%@20, 5.238%@100, Time: 18.413s
Save model to checkpoints/LightGCN_BPRTrainer_LGCNDataset_2.659.pth
Epoch 61/1500, Loss: 0.041799, Time: 321.103s
Test result. Precision: 1.453%@20, 0.978%@100, Recall: 3.406%@20, 10.933%@100, NDCG: 2.663%@20, 5.245%@100, Time: 19.511s
Save model to checkpoints/LightGCN_BPRTrainer_LGCNDataset_2.663.pth
Epoch 62/1500, Loss: 0.041312, Time: 326.250s
Test result. Precision: 1.459%@20, 0.981%@100, Recall: 3.418%@20, 10.953%@100, NDCG: 2.673%@20, 5.257%@100, Time: 19.152s
Save model to checkpoints/LightGCN_BPRTrainer_LGCNDataset_2.673.pth
Epoch 63/1500, Loss: 0.041180, Time: 332.914s
Test result. Precision: 1.461%@20, 0.982%@100, Recall: 3.421%@20, 10.971%@100, NDCG: 2.676%@20, 5.265%@100, Time: 19.148s
Save model to checkpoints/LightGCN_BPRTrainer_LGCNDataset_2.676.pth
Epoch 64/1500, Loss: 0.040833, Time: 329.321s
Test result. Precision: 1.465%@20, 0.985%@100, Recall: 3.428%@20, 11.008%@100, NDCG: 2.680%@20, 5.278%@100, Time: 18.865s
Save model to checkpoints/LightGCN_BPRTrainer_LGCNDataset_2.680.pth
Epoch 65/1500, Loss: 0.040394, Time: 332.480s
Test result. Precision: 1.468%@20, 0.986%@100, Recall: 3.445%@20, 11.031%@100, NDCG: 2.691%@20, 5.292%@100, Time: 20.603s
Save model to checkpoints/LightGCN_BPRTrainer_LGCNDataset_2.691.pth
Epoch 66/1500, Loss: 0.040091, Time: 322.007s
Test result. Precision: 1.471%@20, 0.988%@100, Recall: 3.453%@20, 11.046%@100, NDCG: 2.698%@20, 5.302%@100, Time: 19.416s
Save model to checkpoints/LightGCN_BPRTrainer_LGCNDataset_2.698.pth
Epoch 67/1500, Loss: 0.040096, Time: 329.860s
Test result. Precision: 1.468%@20, 0.989%@100, Recall: 3.447%@20, 11.058%@100, NDCG: 2.698%@20, 5.310%@100, Time: 18.932s
Save model to checkpoints/LightGCN_BPRTrainer_LGCNDataset_2.698.pth
Epoch 68/1500, Loss: 0.039994, Time: 326.169s
Test result. Precision: 1.472%@20, 0.991%@100, Recall: 3.454%@20, 11.079%@100, NDCG: 2.703%@20, 5.319%@100, Time: 20.275s
Save model to checkpoints/LightGCN_BPRTrainer_LGCNDataset_2.703.pth
Epoch 69/1500, Loss: 0.039533, Time: 326.384s
Test result. Precision: 1.472%@20, 0.992%@100, Recall: 3.458%@20, 11.098%@100, NDCG: 2.709%@20, 5.331%@100, Time: 19.444s
Save model to checkpoints/LightGCN_BPRTrainer_LGCNDataset_2.709.pth
Epoch 70/1500, Loss: 0.039313, Time: 323.385s
Test result. Precision: 1.478%@20, 0.994%@100, Recall: 3.468%@20, 11.127%@100, NDCG: 2.718%@20, 5.345%@100, Time: 19.536s
Save model to checkpoints/LightGCN_BPRTrainer_LGCNDataset_2.718.pth
Epoch 71/1500, Loss: 0.038942, Time: 327.433s
Test result. Precision: 1.480%@20, 0.997%@100, Recall: 3.470%@20, 11.165%@100, NDCG: 2.721%@20, 5.361%@100, Time: 19.433s
Save model to checkpoints/LightGCN_BPRTrainer_LGCNDataset_2.721.pth
Epoch 72/1500, Loss: 0.038667, Time: 323.650s
Test result. Precision: 1.485%@20, 1.000%@100, Recall: 3.488%@20, 11.195%@100, NDCG: 2.733%@20, 5.378%@100, Time: 19.741s
Save model to checkpoints/LightGCN_BPRTrainer_LGCNDataset_2.733.pth
Epoch 73/1500, Loss: 0.038456, Time: 327.729s
Test result. Precision: 1.488%@20, 1.003%@100, Recall: 3.501%@20, 11.232%@100, NDCG: 2.739%@20, 5.393%@100, Time: 19.408s
Save model to checkpoints/LightGCN_BPRTrainer_LGCNDataset_2.739.pth
Epoch 74/1500, Loss: 0.038022, Time: 326.418s
Test result. Precision: 1.489%@20, 1.003%@100, Recall: 3.511%@20, 11.220%@100, NDCG: 2.746%@20, 5.394%@100, Time: 19.037s
Save model to checkpoints/LightGCN_BPRTrainer_LGCNDataset_2.746.pth
Epoch 75/1500, Loss: 0.037743, Time: 329.092s
Test result. Precision: 1.485%@20, 1.002%@100, Recall: 3.498%@20, 11.219%@100, NDCG: 2.738%@20, 5.391%@100, Time: 18.608s
Save model to checkpoints/LightGCN_BPRTrainer_LGCNDataset_2.738.pth
Epoch 76/1500, Loss: 0.037292, Time: 323.311s
Test result. Precision: 1.487%@20, 1.003%@100, Recall: 3.507%@20, 11.244%@100, NDCG: 2.739%@20, 5.397%@100, Time: 19.465s
Save model to checkpoints/LightGCN_BPRTrainer_LGCNDataset_2.739.pth
Epoch 77/1500, Loss: 0.037274, Time: 326.672s
Test result. Precision: 1.491%@20, 1.004%@100, Recall: 3.518%@20, 11.257%@100, NDCG: 2.747%@20, 5.407%@100, Time: 18.942s
Save model to checkpoints/LightGCN_BPRTrainer_LGCNDataset_2.747.pth
Epoch 78/1500, Loss: 0.037018, Time: 325.667s
Test result. Precision: 1.486%@20, 1.005%@100, Recall: 3.504%@20, 11.265%@100, NDCG: 2.741%@20, 5.409%@100, Time: 18.540s
Save model to checkpoints/LightGCN_BPRTrainer_LGCNDataset_2.741.pth
Epoch 79/1500, Loss: 0.036934, Time: 328.825s
Test result. Precision: 1.489%@20, 1.008%@100, Recall: 3.516%@20, 11.299%@100, NDCG: 2.751%@20, 5.426%@100, Time: 17.858s
Save model to checkpoints/LightGCN_BPRTrainer_LGCNDataset_2.751.pth
Epoch 80/1500, Loss: 0.036742, Time: 328.912s
Test result. Precision: 1.494%@20, 1.009%@100, Recall: 3.530%@20, 11.318%@100, NDCG: 2.759%@20, 5.435%@100, Time: 18.875s
Save model to checkpoints/LightGCN_BPRTrainer_LGCNDataset_2.759.pth
Epoch 81/1500, Loss: 0.036461, Time: 324.677s
Test result. Precision: 1.504%@20, 1.011%@100, Recall: 3.551%@20, 11.348%@100, NDCG: 2.773%@20, 5.451%@100, Time: 18.952s
Save model to checkpoints/LightGCN_BPRTrainer_LGCNDataset_2.773.pth
Epoch 82/1500, Loss: 0.036193, Time: 326.107s
Test result. Precision: 1.502%@20, 1.012%@100, Recall: 3.547%@20, 11.378%@100, NDCG: 2.772%@20, 5.459%@100, Time: 19.427s
Save model to checkpoints/LightGCN_BPRTrainer_LGCNDataset_2.772.pth
Epoch 83/1500, Loss: 0.036129, Time: 325.254s
Test result. Precision: 1.503%@20, 1.011%@100, Recall: 3.549%@20, 11.363%@100, NDCG: 2.773%@20, 5.458%@100, Time: 18.747s
Save model to checkpoints/LightGCN_BPRTrainer_LGCNDataset_2.773.pth
Epoch 84/1500, Loss: 0.035751, Time: 333.027s
Test result. Precision: 1.506%@20, 1.014%@100, Recall: 3.555%@20, 11.394%@100, NDCG: 2.780%@20, 5.473%@100, Time: 19.408s
Save model to checkpoints/LightGCN_BPRTrainer_LGCNDataset_2.780.pth
Epoch 85/1500, Loss: 0.035667, Time: 330.144s
Test result. Precision: 1.507%@20, 1.015%@100, Recall: 3.553%@20, 11.404%@100, NDCG: 2.782%@20, 5.479%@100, Time: 19.160s
Save model to checkpoints/LightGCN_BPRTrainer_LGCNDataset_2.782.pth
Epoch 86/1500, Loss: 0.035489, Time: 328.197s
Test result. Precision: 1.507%@20, 1.017%@100, Recall: 3.555%@20, 11.428%@100, NDCG: 2.787%@20, 5.493%@100, Time: 18.806s
Save model to checkpoints/LightGCN_BPRTrainer_LGCNDataset_2.787.pth
Epoch 87/1500, Loss: 0.035376, Time: 318.525s
Test result. Precision: 1.510%@20, 1.018%@100, Recall: 3.563%@20, 11.447%@100, NDCG: 2.793%@20, 5.501%@100, Time: 19.197s
Save model to checkpoints/LightGCN_BPRTrainer_LGCNDataset_2.793.pth
Epoch 88/1500, Loss: 0.034927, Time: 329.280s
Test result. Precision: 1.508%@20, 1.017%@100, Recall: 3.562%@20, 11.438%@100, NDCG: 2.785%@20, 5.490%@100, Time: 20.527s
Save model to checkpoints/LightGCN_BPRTrainer_LGCNDataset_2.785.pth
Epoch 89/1500, Loss: 0.034949, Time: 328.773s
Test result. Precision: 1.516%@20, 1.018%@100, Recall: 3.578%@20, 11.452%@100, NDCG: 2.801%@20, 5.506%@100, Time: 19.775s
Save model to checkpoints/LightGCN_BPRTrainer_LGCNDataset_2.801.pth
Epoch 90/1500, Loss: 0.034858, Time: 330.077s
Test result. Precision: 1.516%@20, 1.021%@100, Recall: 3.577%@20, 11.486%@100, NDCG: 2.803%@20, 5.519%@100, Time: 19.054s
Save model to checkpoints/LightGCN_BPRTrainer_LGCNDataset_2.803.pth
Epoch 91/1500, Loss: 0.034589, Time: 328.661s
Test result. Precision: 1.515%@20, 1.021%@100, Recall: 3.585%@20, 11.487%@100, NDCG: 2.810%@20, 5.526%@100, Time: 19.365s
Save model to checkpoints/LightGCN_BPRTrainer_LGCNDataset_2.810.pth
Epoch 92/1500, Loss: 0.034615, Time: 329.429s
Test result. Precision: 1.515%@20, 1.021%@100, Recall: 3.586%@20, 11.494%@100, NDCG: 2.809%@20, 5.525%@100, Time: 20.365s
Save model to checkpoints/LightGCN_BPRTrainer_LGCNDataset_2.809.pth
Epoch 93/1500, Loss: 0.034341, Time: 324.687s
Test result. Precision: 1.525%@20, 1.023%@100, Recall: 3.607%@20, 11.527%@100, NDCG: 2.825%@20, 5.544%@100, Time: 18.110s
Save model to checkpoints/LightGCN_BPRTrainer_LGCNDataset_2.825.pth
Epoch 94/1500, Loss: 0.034061, Time: 326.709s
Test result. Precision: 1.517%@20, 1.023%@100, Recall: 3.592%@20, 11.531%@100, NDCG: 2.815%@20, 5.540%@100, Time: 20.619s
Save model to checkpoints/LightGCN_BPRTrainer_LGCNDataset_2.815.pth
Epoch 95/1500, Loss: 0.034028, Time: 329.370s
Test result. Precision: 1.524%@20, 1.026%@100, Recall: 3.607%@20, 11.552%@100, NDCG: 2.830%@20, 5.559%@100, Time: 19.504s
Save model to checkpoints/LightGCN_BPRTrainer_LGCNDataset_2.830.pth
Epoch 96/1500, Loss: 0.033575, Time: 326.232s
Test result. Precision: 1.521%@20, 1.027%@100, Recall: 3.602%@20, 11.578%@100, NDCG: 2.823%@20, 5.564%@100, Time: 18.944s
Save model to checkpoints/LightGCN_BPRTrainer_LGCNDataset_2.823.pth
Epoch 97/1500, Loss: 0.033473, Time: 325.785s
Test result. Precision: 1.518%@20, 1.028%@100, Recall: 3.593%@20, 11.581%@100, NDCG: 2.817%@20, 5.561%@100, Time: 19.352s
Save model to checkpoints/LightGCN_BPRTrainer_LGCNDataset_2.817.pth
Epoch 98/1500, Loss: 0.033343, Time: 325.789s
Test result. Precision: 1.522%@20, 1.029%@100, Recall: 3.603%@20, 11.592%@100, NDCG: 2.821%@20, 5.566%@100, Time: 19.115s
Save model to checkpoints/LightGCN_BPRTrainer_LGCNDataset_2.821.pth
Epoch 99/1500, Loss: 0.033312, Time: 327.624s
Test result. Precision: 1.527%@20, 1.029%@100, Recall: 3.614%@20, 11.619%@100, NDCG: 2.830%@20, 5.579%@100, Time: 19.952s
Save model to checkpoints/LightGCN_BPRTrainer_LGCNDataset_2.830.pth
Epoch 100/1500, Loss: 0.032600, Time: 323.605s
Test result. Precision: 1.532%@20, 1.032%@100, Recall: 3.624%@20, 11.650%@100, NDCG: 2.836%@20, 5.591%@100, Time: 19.481s
Save model to checkpoints/LightGCN_BPRTrainer_LGCNDataset_2.836.pth
Epoch 101/1500, Loss: 0.032931, Time: 324.775s
Test result. Precision: 1.536%@20, 1.032%@100, Recall: 3.630%@20, 11.637%@100, NDCG: 2.841%@20, 5.591%@100, Time: 20.010s
Save model to checkpoints/LightGCN_BPRTrainer_LGCNDataset_2.841.pth
Epoch 102/1500, Loss: 0.032801, Time: 326.356s
Test result. Precision: 1.541%@20, 1.036%@100, Recall: 3.644%@20, 11.692%@100, NDCG: 2.849%@20, 5.610%@100, Time: 20.078s
Save model to checkpoints/LightGCN_BPRTrainer_LGCNDataset_2.849.pth
Epoch 103/1500, Loss: 0.032596, Time: 328.938s
Test result. Precision: 1.542%@20, 1.037%@100, Recall: 3.650%@20, 11.699%@100, NDCG: 2.847%@20, 5.609%@100, Time: 18.768s
Save model to checkpoints/LightGCN_BPRTrainer_LGCNDataset_2.847.pth
Epoch 104/1500, Loss: 0.032841, Time: 325.996s
Test result. Precision: 1.547%@20, 1.037%@100, Recall: 3.652%@20, 11.701%@100, NDCG: 2.855%@20, 5.615%@100, Time: 18.775s
Save model to checkpoints/LightGCN_BPRTrainer_LGCNDataset_2.855.pth
Epoch 105/1500, Loss: 0.032464, Time: 327.209s
Test result. Precision: 1.542%@20, 1.038%@100, Recall: 3.648%@20, 11.710%@100, NDCG: 2.852%@20, 5.620%@100, Time: 18.613s
Save model to checkpoints/LightGCN_BPRTrainer_LGCNDataset_2.852.pth
Epoch 106/1500, Loss: 0.032266, Time: 320.350s
Test result. Precision: 1.551%@20, 1.039%@100, Recall: 3.664%@20, 11.733%@100, NDCG: 2.859%@20, 5.627%@100, Time: 18.744s
Save model to checkpoints/LightGCN_BPRTrainer_LGCNDataset_2.859.pth
Epoch 107/1500, Loss: 0.031896, Time: 327.642s
Test result. Precision: 1.551%@20, 1.042%@100, Recall: 3.670%@20, 11.747%@100, NDCG: 2.863%@20, 5.637%@100, Time: 18.137s
Save model to checkpoints/LightGCN_BPRTrainer_LGCNDataset_2.863.pth
Epoch 108/1500, Loss: 0.032237, Time: 328.285s
Test result. Precision: 1.556%@20, 1.042%@100, Recall: 3.684%@20, 11.762%@100, NDCG: 2.872%@20, 5.645%@100, Time: 19.050s
Save model to checkpoints/LightGCN_BPRTrainer_LGCNDataset_2.872.pth
Epoch 109/1500, Loss: 0.032051, Time: 328.528s
Test result. Precision: 1.548%@20, 1.042%@100, Recall: 3.672%@20, 11.754%@100, NDCG: 2.863%@20, 5.641%@100, Time: 17.770s
Save model to checkpoints/LightGCN_BPRTrainer_LGCNDataset_2.863.pth
Epoch 110/1500, Loss: 0.031844, Time: 329.319s
Test result. Precision: 1.550%@20, 1.042%@100, Recall: 3.678%@20, 11.764%@100, NDCG: 2.866%@20, 5.645%@100, Time: 17.784s
Save model to checkpoints/LightGCN_BPRTrainer_LGCNDataset_2.866.pth
Epoch 111/1500, Loss: 0.031619, Time: 325.872s
Test result. Precision: 1.551%@20, 1.043%@100, Recall: 3.677%@20, 11.775%@100, NDCG: 2.863%@20, 5.646%@100, Time: 18.820s
Save model to checkpoints/LightGCN_BPRTrainer_LGCNDataset_2.863.pth
Epoch 112/1500, Loss: 0.031396, Time: 321.734s
Test result. Precision: 1.554%@20, 1.046%@100, Recall: 3.680%@20, 11.808%@100, NDCG: 2.868%@20, 5.660%@100, Time: 19.097s
Save model to checkpoints/LightGCN_BPRTrainer_LGCNDataset_2.868.pth
Epoch 113/1500, Loss: 0.031190, Time: 324.700s
Test result. Precision: 1.555%@20, 1.046%@100, Recall: 3.688%@20, 11.802%@100, NDCG: 2.870%@20, 5.658%@100, Time: 18.607s
Save model to checkpoints/LightGCN_BPRTrainer_LGCNDataset_2.870.pth
Epoch 114/1500, Loss: 0.031568, Time: 323.489s
Test result. Precision: 1.557%@20, 1.046%@100, Recall: 3.699%@20, 11.806%@100, NDCG: 2.874%@20, 5.662%@100, Time: 19.039s
Save model to checkpoints/LightGCN_BPRTrainer_LGCNDataset_2.874.pth
Epoch 115/1500, Loss: 0.031071, Time: 328.507s
Test result. Precision: 1.561%@20, 1.048%@100, Recall: 3.709%@20, 11.832%@100, NDCG: 2.886%@20, 5.677%@100, Time: 19.091s
Save model to checkpoints/LightGCN_BPRTrainer_LGCNDataset_2.886.pth
Epoch 116/1500, Loss: 0.030862, Time: 322.558s
Test result. Precision: 1.559%@20, 1.049%@100, Recall: 3.706%@20, 11.843%@100, NDCG: 2.885%@20, 5.682%@100, Time: 19.715s
Save model to checkpoints/LightGCN_BPRTrainer_LGCNDataset_2.885.pth
Epoch 117/1500, Loss: 0.030925, Time: 328.232s
Test result. Precision: 1.561%@20, 1.051%@100, Recall: 3.710%@20, 11.866%@100, NDCG: 2.888%@20, 5.691%@100, Time: 18.564s
Save model to checkpoints/LightGCN_BPRTrainer_LGCNDataset_2.888.pth
Epoch 118/1500, Loss: 0.030747, Time: 325.074s
Test result. Precision: 1.564%@20, 1.053%@100, Recall: 3.717%@20, 11.897%@100, NDCG: 2.894%@20, 5.704%@100, Time: 19.987s
Save model to checkpoints/LightGCN_BPRTrainer_LGCNDataset_2.894.pth
Epoch 119/1500, Loss: 0.031015, Time: 291.725s
Test result. Precision: 1.566%@20, 1.053%@100, Recall: 3.724%@20, 11.906%@100, NDCG: 2.897%@20, 5.706%@100, Time: 16.908s
Save model to checkpoints/LightGCN_BPRTrainer_LGCNDataset_2.897.pth
Epoch 120/1500, Loss: 0.030865, Time: 280.260s
Test result. Precision: 1.566%@20, 1.054%@100, Recall: 3.724%@20, 11.914%@100, NDCG: 2.898%@20, 5.711%@100, Time: 16.783s
Save model to checkpoints/LightGCN_BPRTrainer_LGCNDataset_2.898.pth
Epoch 121/1500, Loss: 0.030720, Time: 293.793s
Test result. Precision: 1.571%@20, 1.056%@100, Recall: 3.732%@20, 11.939%@100, NDCG: 2.906%@20, 5.724%@100, Time: 17.436s
Save model to checkpoints/LightGCN_BPRTrainer_LGCNDataset_2.906.pth
Epoch 122/1500, Loss: 0.030668, Time: 284.128s
Test result. Precision: 1.571%@20, 1.057%@100, Recall: 3.728%@20, 11.939%@100, NDCG: 2.906%@20, 5.727%@100, Time: 16.803s
Save model to checkpoints/LightGCN_BPRTrainer_LGCNDataset_2.906.pth
Epoch 123/1500, Loss: 0.030327, Time: 276.976s
Test result. Precision: 1.573%@20, 1.057%@100, Recall: 3.744%@20, 11.951%@100, NDCG: 2.907%@20, 5.726%@100, Time: 16.524s
Save model to checkpoints/LightGCN_BPRTrainer_LGCNDataset_2.907.pth
Epoch 124/1500, Loss: 0.030292, Time: 321.061s
Test result. Precision: 1.569%@20, 1.057%@100, Recall: 3.732%@20, 11.959%@100, NDCG: 2.902%@20, 5.727%@100, Time: 20.247s
Save model to checkpoints/LightGCN_BPRTrainer_LGCNDataset_2.902.pth
Epoch 125/1500, Loss: 0.029972, Time: 331.701s
Test result. Precision: 1.570%@20, 1.056%@100, Recall: 3.737%@20, 11.940%@100, NDCG: 2.904%@20, 5.720%@100, Time: 19.473s
Save model to checkpoints/LightGCN_BPRTrainer_LGCNDataset_2.904.pth
Epoch 126/1500, Loss: 0.030026, Time: 323.546s
Test result. Precision: 1.569%@20, 1.056%@100, Recall: 3.733%@20, 11.952%@100, NDCG: 2.902%@20, 5.724%@100, Time: 19.120s
Save model to checkpoints/LightGCN_BPRTrainer_LGCNDataset_2.902.pth
Epoch 127/1500, Loss: 0.029889, Time: 326.686s
Test result. Precision: 1.576%@20, 1.058%@100, Recall: 3.749%@20, 11.960%@100, NDCG: 2.914%@20, 5.735%@100, Time: 19.473s
Save model to checkpoints/LightGCN_BPRTrainer_LGCNDataset_2.914.pth
Epoch 128/1500, Loss: 0.029984, Time: 328.053s
Test result. Precision: 1.577%@20, 1.057%@100, Recall: 3.751%@20, 11.967%@100, NDCG: 2.915%@20, 5.737%@100, Time: 19.417s
Save model to checkpoints/LightGCN_BPRTrainer_LGCNDataset_2.915.pth
Epoch 129/1500, Loss: 0.029907, Time: 327.360s
Test result. Precision: 1.582%@20, 1.061%@100, Recall: 3.763%@20, 12.005%@100, NDCG: 2.919%@20, 5.749%@100, Time: 20.532s
Save model to checkpoints/LightGCN_BPRTrainer_LGCNDataset_2.919.pth
Epoch 130/1500, Loss: 0.029632, Time: 324.477s
Test result. Precision: 1.582%@20, 1.062%@100, Recall: 3.762%@20, 12.024%@100, NDCG: 2.925%@20, 5.761%@100, Time: 20.352s
Save model to checkpoints/LightGCN_BPRTrainer_LGCNDataset_2.925.pth
Epoch 131/1500, Loss: 0.029561, Time: 330.967s
Test result. Precision: 1.580%@20, 1.062%@100, Recall: 3.761%@20, 12.023%@100, NDCG: 2.929%@20, 5.767%@100, Time: 20.348s
Save model to checkpoints/LightGCN_BPRTrainer_LGCNDataset_2.929.pth
Epoch 132/1500, Loss: 0.029481, Time: 326.428s
Test result. Precision: 1.582%@20, 1.064%@100, Recall: 3.765%@20, 12.050%@100, NDCG: 2.932%@20, 5.778%@100, Time: 19.805s
Save model to checkpoints/LightGCN_BPRTrainer_LGCNDataset_2.932.pth
Epoch 133/1500, Loss: 0.029597, Time: 325.970s
Test result. Precision: 1.582%@20, 1.064%@100, Recall: 3.766%@20, 12.042%@100, NDCG: 2.932%@20, 5.775%@100, Time: 19.342s
Save model to checkpoints/LightGCN_BPRTrainer_LGCNDataset_2.932.pth
Epoch 134/1500, Loss: 0.029341, Time: 327.684s
Test result. Precision: 1.585%@20, 1.065%@100, Recall: 3.770%@20, 12.063%@100, NDCG: 2.934%@20, 5.781%@100, Time: 19.466s
Save model to checkpoints/LightGCN_BPRTrainer_LGCNDataset_2.934.pth
Epoch 135/1500, Loss: 0.029275, Time: 327.500s
Test result. Precision: 1.590%@20, 1.065%@100, Recall: 3.785%@20, 12.062%@100, NDCG: 2.941%@20, 5.783%@100, Time: 20.324s
Save model to checkpoints/LightGCN_BPRTrainer_LGCNDataset_2.941.pth
Epoch 136/1500, Loss: 0.029235, Time: 334.576s
Test result. Precision: 1.595%@20, 1.066%@100, Recall: 3.795%@20, 12.071%@100, NDCG: 2.946%@20, 5.788%@100, Time: 19.868s
Save model to checkpoints/LightGCN_BPRTrainer_LGCNDataset_2.946.pth
Epoch 137/1500, Loss: 0.029301, Time: 322.266s
Test result. Precision: 1.593%@20, 1.067%@100, Recall: 3.796%@20, 12.086%@100, NDCG: 2.946%@20, 5.793%@100, Time: 19.079s
Save model to checkpoints/LightGCN_BPRTrainer_LGCNDataset_2.946.pth
Epoch 138/1500, Loss: 0.029121, Time: 324.857s
Test result. Precision: 1.598%@20, 1.068%@100, Recall: 3.805%@20, 12.095%@100, NDCG: 2.957%@20, 5.803%@100, Time: 19.078s
Save model to checkpoints/LightGCN_BPRTrainer_LGCNDataset_2.957.pth
Epoch 139/1500, Loss: 0.029130, Time: 322.257s
Test result. Precision: 1.601%@20, 1.069%@100, Recall: 3.818%@20, 12.100%@100, NDCG: 2.964%@20, 5.808%@100, Time: 20.180s
Save model to checkpoints/LightGCN_BPRTrainer_LGCNDataset_2.964.pth
Epoch 140/1500, Loss: 0.028974, Time: 324.572s
Test result. Precision: 1.601%@20, 1.069%@100, Recall: 3.813%@20, 12.108%@100, NDCG: 2.962%@20, 5.809%@100, Time: 20.071s
Save model to checkpoints/LightGCN_BPRTrainer_LGCNDataset_2.962.pth
Epoch 141/1500, Loss: 0.028816, Time: 320.776s
Test result. Precision: 1.601%@20, 1.070%@100, Recall: 3.815%@20, 12.122%@100, NDCG: 2.964%@20, 5.815%@100, Time: 18.968s
Save model to checkpoints/LightGCN_BPRTrainer_LGCNDataset_2.964.pth
Epoch 142/1500, Loss: 0.028853, Time: 326.783s
Test result. Precision: 1.607%@20, 1.070%@100, Recall: 3.832%@20, 12.125%@100, NDCG: 2.973%@20, 5.819%@100, Time: 18.747s
Save model to checkpoints/LightGCN_BPRTrainer_LGCNDataset_2.973.pth
Epoch 143/1500, Loss: 0.028654, Time: 322.167s
Test result. Precision: 1.604%@20, 1.069%@100, Recall: 3.819%@20, 12.113%@100, NDCG: 2.968%@20, 5.815%@100, Time: 18.994s
Save model to checkpoints/LightGCN_BPRTrainer_LGCNDataset_2.968.pth
Epoch 144/1500, Loss: 0.028693, Time: 325.045s
Test result. Precision: 1.604%@20, 1.071%@100, Recall: 3.820%@20, 12.133%@100, NDCG: 2.970%@20, 5.823%@100, Time: 19.232s
Save model to checkpoints/LightGCN_BPRTrainer_LGCNDataset_2.970.pth
Epoch 145/1500, Loss: 0.028760, Time: 324.347s
Test result. Precision: 1.608%@20, 1.073%@100, Recall: 3.831%@20, 12.162%@100, NDCG: 2.978%@20, 5.835%@100, Time: 19.543s
Save model to checkpoints/LightGCN_BPRTrainer_LGCNDataset_2.978.pth
Epoch 146/1500, Loss: 0.028595, Time: 330.268s
Test result. Precision: 1.606%@20, 1.071%@100, Recall: 3.830%@20, 12.139%@100, NDCG: 2.976%@20, 5.828%@100, Time: 17.558s
[truncated: 3,161,782 more chars]
