# Supplementary material for: Research on Recommendation Algorithm of Joint Light Graph Convolution Network and DropEdge
Source: Hindawi journal article supplement (doi:10.1155/2022/3843021), 2022-01-27
Supplement: f1 [file 3843021.f1.zip › 3843021.f1/run-gowalla (1).txt]

/home/qhc/anaconda3/envs/LightGCN/bin/python /home/qhc/下载/LightGCN-PyTorch-master/code/main.py
Cpp extension not loaded
>>SEED: 2020
loading [../data/gowalla]
810128 interactions for training
217242 interactions for testing
gowalla Sparsity : 0.0008396216228570436
gowalla is ready to go
===========config================
{'A_n_fold': 100,
 'A_split': False,
 'bigdata': False,
 'bpr_batch_size': 2048,
 'decay': 0.0001,
 'dropout': 0,
 'keep_prob': 0.6,
 'latent_dim_rec': 64,
 'lightGCN_n_layers': 3,
 'lr': 0.001,
 'multicore': 0,
 'pretrain': 0,
 'test_u_batch_size': 100}
cores for test: 4
comment: lgn
tensorboard: 1
LOAD: 0
Weight path: ./checkpoints
Test Topks: [20]
using bpr loss
===========end===================
use NORMAL distribution initilizer
loading adjacency matrix
successfully loaded...
don't split the matrix
lgn is already to go(dropout:0)
load and save to /home/qhc/下载/LightGCN-PyTorch-master/code/checkpoints/lgn-gowalla-3-64.pth.tar
[TEST]
{'precision': array([0.00018755]), 'recall': array([0.00053749]), 'ndcg': array([0.00040836])}
EPOCH[1/1000] loss0.545-|Sample:7.14|
EPOCH[2/1000] loss0.240-|Sample:9.24|
EPOCH[3/1000] loss0.163-|Sample:9.55|
EPOCH[4/1000] loss0.131-|Sample:9.32|
EPOCH[5/1000] loss0.112-|Sample:9.15|
EPOCH[6/1000] loss0.099-|Sample:9.25|
EPOCH[7/1000] loss0.090-|Sample:9.38|
EPOCH[8/1000] loss0.084-|Sample:9.25|
EPOCH[9/1000] loss0.078-|Sample:9.14|
EPOCH[10/1000] loss0.074-|Sample:9.05|
[TEST]
{'precision': array([0.03665852]), 'recall': array([0.12015337]), 'ndcg': array([0.10059361])}
EPOCH[11/1000] loss0.071-|Sample:9.43|
EPOCH[12/1000] loss0.068-|Sample:9.22|
EPOCH[13/1000] loss0.065-|Sample:9.02|
EPOCH[14/1000] loss0.064-|Sample:9.34|
EPOCH[15/1000] loss0.061-|Sample:8.92|
EPOCH[16/1000] loss0.059-|Sample:9.30|
EPOCH[17/1000] loss0.057-|Sample:9.21|
EPOCH[18/1000] loss0.055-|Sample:9.49|
EPOCH[19/1000] loss0.054-|Sample:9.14|
EPOCH[20/1000] loss0.052-|Sample:9.11|
[TEST]
{'precision': array([0.03967613]), 'recall': array([0.13131503]), 'ndcg': array([0.10875967])}
EPOCH[21/1000] loss0.052-|Sample:9.11|
EPOCH[22/1000] loss0.050-|Sample:9.18|
EPOCH[23/1000] loss0.049-|Sample:7.47|
EPOCH[24/1000] loss0.048-|Sample:9.23|
EPOCH[25/1000] loss0.047-|Sample:9.51|
EPOCH[26/1000] loss0.046-|Sample:9.33|
EPOCH[27/1000] loss0.045-|Sample:9.32|
EPOCH[28/1000] loss0.044-|Sample:9.30|
EPOCH[29/1000] loss0.043-|Sample:9.34|
EPOCH[30/1000] loss0.042-|Sample:9.04|
[TEST]
{'precision': array([0.04200717]), 'recall': array([0.13924743]), 'ndcg': array([0.11538258])}
EPOCH[31/1000] loss0.042-|Sample:9.19|
EPOCH[32/1000] loss0.041-|Sample:6.67|
EPOCH[33/1000] loss0.040-|Sample:8.99|
EPOCH[34/1000] loss0.039-|Sample:9.04|
EPOCH[35/1000] loss0.039-|Sample:9.34|
EPOCH[36/1000] loss0.038-|Sample:9.12|
EPOCH[37/1000] loss0.037-|Sample:9.22|
EPOCH[38/1000] loss0.037-|Sample:9.44|
EPOCH[39/1000] loss0.036-|Sample:9.23|
EPOCH[40/1000] loss0.036-|Sample:9.08|
[TEST]
{'precision': array([0.0435076]), 'recall': array([0.14442291]), 'ndcg': array([0.1201835])}
EPOCH[41/1000] loss0.035-|Sample:9.43|
EPOCH[42/1000] loss0.035-|Sample:9.28|
EPOCH[43/1000] loss0.034-|Sample:9.33|
EPOCH[44/1000] loss0.034-|Sample:9.24|
EPOCH[45/1000] loss0.033-|Sample:7.52|
EPOCH[46/1000] loss0.033-|Sample:9.26|
EPOCH[47/1000] loss0.032-|Sample:9.22|
EPOCH[48/1000] loss0.032-|Sample:9.23|
EPOCH[49/1000] loss0.032-|Sample:9.26|
EPOCH[50/1000] loss0.031-|Sample:9.07|
[TEST]
{'precision': array([0.04473675]), 'recall': array([0.14866195]), 'ndcg': array([0.12404615])}
EPOCH[51/1000] loss0.031-|Sample:9.14|
EPOCH[52/1000] loss0.030-|Sample:8.94|
EPOCH[53/1000] loss0.030-|Sample:9.26|
EPOCH[54/1000] loss0.030-|Sample:6.93|
EPOCH[55/1000] loss0.030-|Sample:9.20|
EPOCH[56/1000] loss0.029-|Sample:9.20|
EPOCH[57/1000] loss0.030-|Sample:9.45|
EPOCH[58/1000] loss0.028-|Sample:9.38|
EPOCH[59/1000] loss0.029-|Sample:9.39|
EPOCH[60/1000] loss0.028-|Sample:9.16|
[TEST]
{'precision': array([0.04582691]), 'recall': array([0.15269575]), 'ndcg': array([0.1276948])}
EPOCH[61/1000] loss0.028-|Sample:8.98|
EPOCH[62/1000] loss0.028-|Sample:9.39|
EPOCH[63/1000] loss0.027-|Sample:9.36|
EPOCH[64/1000] loss0.027-|Sample:9.10|
EPOCH[65/1000] loss0.027-|Sample:9.26|
EPOCH[66/1000] loss0.027-|Sample:9.16|
EPOCH[67/1000] loss0.026-|Sample:7.44|
EPOCH[68/1000] loss0.026-|Sample:9.25|
EPOCH[69/1000] loss0.026-|Sample:9.28|
EPOCH[70/1000] loss0.026-|Sample:9.23|
[TEST]
{'precision': array([0.04667091]), 'recall': array([0.15541536]), 'ndcg': array([0.13018416])}
EPOCH[71/1000] loss0.026-|Sample:9.14|
EPOCH[72/1000] loss0.025-|Sample:9.37|
EPOCH[73/1000] loss0.025-|Sample:9.07|
EPOCH[74/1000] loss0.025-|Sample:9.25|
EPOCH[75/1000] loss0.024-|Sample:9.13|
EPOCH[76/1000] loss0.024-|Sample:7.90|
EPOCH[77/1000] loss0.024-|Sample:9.39|
EPOCH[78/1000] loss0.023-|Sample:9.06|
EPOCH[79/1000] loss0.023-|Sample:9.19|
EPOCH[80/1000] loss0.023-|Sample:9.36|
[TEST]
{'precision': array([0.0476472]), 'recall': array([0.15883808]), 'ndcg': array([0.13281317])}
EPOCH[81/1000] loss0.023-|Sample:9.08|
EPOCH[82/1000] loss0.023-|Sample:9.68|
EPOCH[83/1000] loss0.023-|Sample:9.31|
EPOCH[84/1000] loss0.023-|Sample:9.12|
EPOCH[85/1000] loss0.023-|Sample:9.33|
EPOCH[86/1000] loss0.022-|Sample:9.31|
EPOCH[87/1000] loss0.022-|Sample:9.57|
EPOCH[88/1000] loss0.022-|Sample:9.34|
EPOCH[89/1000] loss0.022-|Sample:7.45|
EPOCH[90/1000] loss0.022-|Sample:9.47|
[TEST]
{'precision': array([0.04828522]), 'recall': array([0.16124342]), 'ndcg': array([0.134886])}
EPOCH[91/1000] loss0.022-|Sample:9.25|
EPOCH[92/1000] loss0.021-|Sample:8.99|
EPOCH[93/1000] loss0.021-|Sample:9.17|
EPOCH[94/1000] loss0.021-|Sample:9.35|
EPOCH[95/1000] loss0.021-|Sample:9.14|
EPOCH[96/1000] loss0.021-|Sample:9.28|
EPOCH[97/1000] loss0.021-|Sample:9.12|
EPOCH[98/1000] loss0.021-|Sample:9.31|
EPOCH[99/1000] loss0.021-|Sample:9.18|
EPOCH[100/1000] loss0.021-|Sample:9.32|
[TEST]
{'precision': array([0.04904046]), 'recall': array([0.16339769]), 'ndcg': array([0.13709163])}
EPOCH[101/1000] loss0.020-|Sample:9.12|
EPOCH[102/1000] loss0.020-|Sample:9.21|
EPOCH[103/1000] loss0.020-|Sample:9.02|
EPOCH[104/1000] loss0.020-|Sample:9.14|
EPOCH[105/1000] loss0.020-|Sample:9.10|
EPOCH[106/1000] loss0.020-|Sample:9.21|
EPOCH[107/1000] loss0.020-|Sample:9.31|
EPOCH[108/1000] loss0.019-|Sample:9.17|
EPOCH[109/1000] loss0.019-|Sample:9.24|
EPOCH[110/1000] loss0.019-|Sample:9.28|
[TEST]
{'precision': array([0.04967011]), 'recall': array([0.16563994]), 'ndcg': array([0.138832])}
EPOCH[111/1000] loss0.019-|Sample:7.50|
EPOCH[112/1000] loss0.019-|Sample:9.08|
EPOCH[113/1000] loss0.019-|Sample:9.18|
EPOCH[114/1000] loss0.019-|Sample:9.34|
EPOCH[115/1000] loss0.019-|Sample:9.18|
EPOCH[116/1000] loss0.019-|Sample:9.03|
EPOCH[117/1000] loss0.019-|Sample:9.19|
EPOCH[118/1000] loss0.018-|Sample:8.90|
EPOCH[119/1000] loss0.018-|Sample:9.30|
EPOCH[120/1000] loss0.018-|Sample:9.40|
[TEST]
{'precision': array([0.05003014]), 'recall': array([0.16645654]), 'ndcg': array([0.14007966])}
EPOCH[121/1000] loss0.018-|Sample:9.22|
EPOCH[122/1000] loss0.018-|Sample:9.22|
EPOCH[123/1000] loss0.018-|Sample:9.22|
EPOCH[124/1000] loss0.018-|Sample:9.15|
EPOCH[125/1000] loss0.018-|Sample:9.22|
EPOCH[126/1000] loss0.018-|Sample:9.31|
EPOCH[127/1000] loss0.018-|Sample:9.19|
EPOCH[128/1000] loss0.018-|Sample:9.37|
EPOCH[129/1000] loss0.018-|Sample:9.59|
EPOCH[130/1000] loss0.018-|Sample:9.40|
[TEST]
{'precision': array([0.05057606]), 'recall': array([0.16803698]), 'ndcg': array([0.14163279])}
EPOCH[131/1000] loss0.017-|Sample:9.22|
EPOCH[132/1000] loss0.017-|Sample:9.23|
EPOCH[133/1000] loss0.017-|Sample:8.33|
EPOCH[134/1000] loss0.017-|Sample:9.06|
EPOCH[135/1000] loss0.017-|Sample:8.95|
EPOCH[136/1000] loss0.017-|Sample:9.15|
EPOCH[137/1000] loss0.017-|Sample:9.24|
EPOCH[138/1000] loss0.017-|Sample:9.17|
EPOCH[139/1000] loss0.017-|Sample:9.44|
EPOCH[140/1000] loss0.017-|Sample:9.20|
[TEST]
{'precision': array([0.05098131]), 'recall': array([0.16939592]), 'ndcg': array([0.14267755])}
EPOCH[141/1000] loss0.017-|Sample:9.29|
EPOCH[142/1000] loss0.017-|Sample:9.46|
EPOCH[143/1000] loss0.017-|Sample:9.23|
EPOCH[144/1000] loss0.017-|Sample:9.13|
EPOCH[145/1000] loss0.017-|Sample:8.99|
EPOCH[146/1000] loss0.016-|Sample:9.47|
EPOCH[147/1000] loss0.016-|Sample:9.26|
EPOCH[148/1000] loss0.016-|Sample:9.48|
EPOCH[149/1000] loss0.016-|Sample:9.21|
EPOCH[150/1000] loss0.016-|Sample:9.16|
[TEST]
{'precision': array([0.05128274]), 'recall': array([0.17043011]), 'ndcg': array([0.14369849])}
EPOCH[151/1000] loss0.016-|Sample:9.21|
EPOCH[152/1000] loss0.016-|Sample:9.22|
EPOCH[153/1000] loss0.016-|Sample:9.60|
EPOCH[154/1000] loss0.016-|Sample:9.45|
EPOCH[155/1000] loss0.016-|Sample:7.55|
EPOCH[156/1000] loss0.016-|Sample:9.18|
EPOCH[157/1000] loss0.016-|Sample:9.29|
EPOCH[158/1000] loss0.016-|Sample:9.49|
EPOCH[159/1000] loss0.016-|Sample:9.45|
EPOCH[160/1000] loss0.016-|Sample:9.32|
[TEST]
{'precision': array([0.05161263]), 'recall': array([0.1715222]), 'ndcg': array([0.14475516])}
EPOCH[161/1000] loss0.016-|Sample:9.35|
EPOCH[162/1000] loss0.015-|Sample:9.14|
EPOCH[163/1000] loss0.016-|Sample:9.45|
EPOCH[164/1000] loss0.015-|Sample:9.36|
EPOCH[165/1000] loss0.015-|Sample:9.33|
EPOCH[166/1000] loss0.015-|Sample:9.27|
EPOCH[167/1000] loss0.015-|Sample:9.28|
EPOCH[168/1000] loss0.015-|Sample:9.37|
EPOCH[169/1000] loss0.015-|Sample:9.29|
EPOCH[170/1000] loss0.015-|Sample:9.42|
[TEST]
{'precision': array([0.05179014]), 'recall': array([0.17200728]), 'ndcg': array([0.14534748])}
EPOCH[171/1000] loss0.015-|Sample:9.53|
EPOCH[172/1000] loss0.015-|Sample:9.01|
EPOCH[173/1000] loss0.015-|Sample:9.51|
EPOCH[174/1000] loss0.015-|Sample:8.97|
EPOCH[175/1000] loss0.015-|Sample:9.29|
EPOCH[176/1000] loss0.015-|Sample:9.66|
EPOCH[177/1000] loss0.015-|Sample:7.52|
EPOCH[178/1000] loss0.015-|Sample:9.17|
EPOCH[179/1000] loss0.015-|Sample:9.28|
EPOCH[180/1000] loss0.015-|Sample:9.14|
[TEST]
{'precision': array([0.05202961]), 'recall': array([0.17248332]), 'ndcg': array([0.14587117])}
EPOCH[181/1000] loss0.015-|Sample:9.24|
EPOCH[182/1000] loss0.015-|Sample:9.21|
EPOCH[183/1000] loss0.015-|Sample:9.47|
EPOCH[184/1000] loss0.015-|Sample:9.05|
EPOCH[185/1000] loss0.015-|Sample:9.23|
EPOCH[186/1000] loss0.015-|Sample:9.27|
EPOCH[187/1000] loss0.014-|Sample:9.27|
EPOCH[188/1000] loss0.015-|Sample:8.57|
EPOCH[189/1000] loss0.015-|Sample:9.41|
EPOCH[190/1000] loss0.015-|Sample:9.14|
[TEST]
{'precision': array([0.05234945]), 'recall': array([0.17321986]), 'ndcg': array([0.14665727])}
EPOCH[191/1000] loss0.015-|Sample:9.23|
EPOCH[192/1000] loss0.014-|Sample:9.29|
EPOCH[193/1000] loss0.015-|Sample:8.87|
EPOCH[194/1000] loss0.014-|Sample:9.34|
EPOCH[195/1000] loss0.014-|Sample:9.31|
EPOCH[196/1000] loss0.014-|Sample:9.62|
EPOCH[197/1000] loss0.014-|Sample:9.41|
EPOCH[198/1000] loss0.014-|Sample:9.15|
EPOCH[199/1000] loss0.014-|Sample:7.49|
EPOCH[200/1000] loss0.014-|Sample:8.98|
[TEST]
{'precision': array([0.05258557]), 'recall': array([0.17428267]), 'ndcg': array([0.14727047])}
EPOCH[201/1000] loss0.014-|Sample:9.33|
EPOCH[202/1000] loss0.014-|Sample:9.00|
EPOCH[203/1000] loss0.014-|Sample:9.38|
EPOCH[204/1000] loss0.014-|Sample:9.20|
EPOCH[205/1000] loss0.014-|Sample:9.33|
EPOCH[206/1000] loss0.014-|Sample:8.91|
EPOCH[207/1000] loss0.014-|Sample:9.43|
EPOCH[208/1000] loss0.014-|Sample:9.06|
EPOCH[209/1000] loss0.014-|Sample:9.24|
EPOCH[210/1000] loss0.014-|Sample:6.48|
[TEST]
{'precision': array([0.05277313]), 'recall': array([0.17486576]), 'ndcg': array([0.14773985])}
EPOCH[211/1000] loss0.014-|Sample:9.48|
EPOCH[212/1000] loss0.014-|Sample:9.02|
EPOCH[213/1000] loss0.014-|Sample:9.20|
EPOCH[214/1000] loss0.014-|Sample:9.08|
EPOCH[215/1000] loss0.014-|Sample:9.12|
EPOCH[216/1000] loss0.014-|Sample:9.40|
EPOCH[217/1000] loss0.014-|Sample:9.28|
EPOCH[218/1000] loss0.014-|Sample:9.34|
EPOCH[219/1000] loss0.014-|Sample:9.31|
EPOCH[220/1000] loss0.014-|Sample:8.98|
[TEST]
{'precision': array([0.05284848]), 'recall': array([0.17483458]), 'ndcg': array([0.14819752])}
EPOCH[221/1000] loss0.014-|Sample:9.29|
EPOCH[222/1000] loss0.013-|Sample:9.60|
EPOCH[223/1000] loss0.013-|Sample:9.27|
EPOCH[224/1000] loss0.014-|Sample:9.22|
EPOCH[225/1000] loss0.014-|Sample:9.01|
EPOCH[226/1000] loss0.014-|Sample:9.18|
EPOCH[227/1000] loss0.014-|Sample:9.36|
EPOCH[228/1000] loss0.013-|Sample:9.44|
EPOCH[229/1000] loss0.013-|Sample:9.58|
EPOCH[230/1000] loss0.013-|Sample:9.38|
[TEST]
{'precision': array([0.05313484]), 'recall': array([0.17569493]), 'ndcg': array([0.1486609])}
EPOCH[231/1000] loss0.013-|Sample:9.16|
EPOCH[232/1000] loss0.014-|Sample:9.42|
EPOCH[233/1000] loss0.013-|Sample:9.24|
EPOCH[234/1000] loss0.013-|Sample:9.01|
EPOCH[235/1000] loss0.013-|Sample:9.22|
EPOCH[236/1000] loss0.013-|Sample:9.20|
EPOCH[237/1000] loss0.013-|Sample:9.47|
EPOCH[238/1000] loss0.013-|Sample:9.15|
EPOCH[239/1000] loss0.013-|Sample:9.33|
EPOCH[240/1000] loss0.013-|Sample:9.16|
[TEST]
{'precision': array([0.05305446]), 'recall': array([0.17542906]), 'ndcg': array([0.14852576])}
EPOCH[241/1000] loss0.013-|Sample:9.10|
EPOCH[242/1000] loss0.013-|Sample:9.00|
EPOCH[243/1000] loss0.013-|Sample:9.26|
EPOCH[244/1000] loss0.013-|Sample:9.14|
EPOCH[245/1000] loss0.013-|Sample:9.17|
EPOCH[246/1000] loss0.013-|Sample:9.43|
EPOCH[247/1000] loss0.013-|Sample:9.24|
EPOCH[248/1000] loss0.013-|Sample:9.24|
EPOCH[249/1000] loss0.013-|Sample:9.21|
EPOCH[250/1000] loss0.013-|Sample:9.30|
[TEST]
{'precision': array([0.0531968]), 'recall': array([0.17546172]), 'ndcg': array([0.14879368])}
EPOCH[251/1000] loss0.013-|Sample:9.23|
EPOCH[252/1000] loss0.013-|Sample:9.18|
EPOCH[253/1000] loss0.013-|Sample:9.16|
EPOCH[254/1000] loss0.013-|Sample:9.08|
EPOCH[255/1000] loss0.013-|Sample:8.95|
EPOCH[256/1000] loss0.013-|Sample:9.13|
EPOCH[257/1000] loss0.013-|Sample:9.38|
EPOCH[258/1000] loss0.013-|Sample:9.37|
EPOCH[259/1000] loss0.013-|Sample:9.22|
EPOCH[260/1000] loss0.013-|Sample:9.07|
[TEST]
{'precision': array([0.05343626]), 'recall': array([0.17622874]), 'ndcg': array([0.14931354])}
EPOCH[261/1000] loss0.013-|Sample:9.29|
EPOCH[262/1000] loss0.013-|Sample:8.99|
EPOCH[263/1000] loss0.013-|Sample:9.33|
EPOCH[264/1000] loss0.013-|Sample:9.08|
EPOCH[265/1000] loss0.013-|Sample:7.54|
EPOCH[266/1000] loss0.013-|Sample:9.34|
EPOCH[267/1000] loss0.013-|Sample:9.22|
EPOCH[268/1000] loss0.013-|Sample:9.40|
EPOCH[269/1000] loss0.013-|Sample:9.17|
EPOCH[270/1000] loss0.013-|Sample:9.09|
[TEST]
{'precision': array([0.05365731]), 'recall': array([0.17686527]), 'ndcg': array([0.14979312])}
EPOCH[271/1000] loss0.013-|Sample:9.32|
EPOCH[272/1000] loss0.013-|Sample:9.37|
EPOCH[273/1000] loss0.013-|Sample:8.96|
EPOCH[274/1000] loss0.013-|Sample:8.98|
EPOCH[275/1000] loss0.013-|Sample:9.24|
EPOCH[276/1000] loss0.013-|Sample:9.10|
EPOCH[277/1000] loss0.013-|Sample:9.06|
EPOCH[278/1000] loss0.013-|Sample:9.01|
EPOCH[279/1000] loss0.013-|Sample:9.04|
EPOCH[280/1000] loss0.012-|Sample:9.65|
[TEST]
{'precision': array([0.05374272]), 'recall': array([0.17722057]), 'ndcg': array([0.1500049])}
EPOCH[281/1000] loss0.013-|Sample:9.26|
EPOCH[282/1000] loss0.013-|Sample:9.06|
EPOCH[283/1000] loss0.012-|Sample:9.07|
EPOCH[284/1000] loss0.013-|Sample:9.18|
EPOCH[285/1000] loss0.013-|Sample:9.05|
EPOCH[286/1000] loss0.013-|Sample:9.10|
EPOCH[287/1000] loss0.013-|Sample:8.22|
EPOCH[288/1000] loss0.012-|Sample:9.02|
EPOCH[289/1000] loss0.013-|Sample:9.32|
EPOCH[290/1000] loss0.013-|Sample:9.42|
[TEST]
{'precision': array([0.05365899]), 'recall': array([0.1767449]), 'ndcg': array([0.15003612])}
EPOCH[291/1000] loss0.012-|Sample:9.27|
EPOCH[292/1000] loss0.012-|Sample:9.31|
EPOCH[293/1000] loss0.013-|Sample:9.38|
EPOCH[294/1000] loss0.012-|Sample:9.06|
EPOCH[295/1000] loss0.013-|Sample:9.17|
EPOCH[296/1000] loss0.012-|Sample:9.31|
EPOCH[297/1000] loss0.012-|Sample:9.16|
EPOCH[298/1000] loss0.012-|Sample:8.11|
EPOCH[299/1000] loss0.012-|Sample:9.38|
EPOCH[300/1000] loss0.012-|Sample:9.29|
[TEST]
{'precision': array([0.0538231]), 'recall': array([0.17753683]), 'ndcg': array([0.15055076])}
EPOCH[301/1000] loss0.013-|Sample:9.33|
EPOCH[302/1000] loss0.012-|Sample:9.21|
EPOCH[303/1000] loss0.012-|Sample:9.52|
EPOCH[304/1000] loss0.012-|Sample:9.14|
EPOCH[305/1000] loss0.012-|Sample:9.23|
EPOCH[306/1000] loss0.013-|Sample:9.37|
EPOCH[307/1000] loss0.012-|Sample:9.25|
EPOCH[308/1000] loss0.012-|Sample:9.38|
EPOCH[309/1000] loss0.013-|Sample:7.54|
EPOCH[310/1000] loss0.012-|Sample:9.23|
[TEST]
{'precision': array([0.05384821]), 'recall': array([0.17756937]), 'ndcg': array([0.15072583])}
EPOCH[311/1000] loss0.012-|Sample:9.07|
EPOCH[312/1000] loss0.012-|Sample:9.21|
EPOCH[313/1000] loss0.012-|Sample:9.06|
EPOCH[314/1000] loss0.012-|Sample:9.15|
EPOCH[315/1000] loss0.012-|Sample:9.40|
EPOCH[316/1000] loss0.012-|Sample:9.18|
EPOCH[317/1000] loss0.012-|Sample:9.02|
EPOCH[318/1000] loss0.012-|Sample:9.04|
EPOCH[319/1000] loss0.012-|Sample:9.47|
EPOCH[320/1000] loss0.012-|Sample:8.43|
[TEST]
{'precision': array([0.05381305]), 'recall': array([0.17709647]), 'ndcg': array([0.15059662])}
EPOCH[321/1000] loss0.012-|Sample:9.16|
EPOCH[322/1000] loss0.012-|Sample:9.20|
EPOCH[323/1000] loss0.012-|Sample:9.48|
EPOCH[324/1000] loss0.012-|Sample:9.18|
EPOCH[325/1000] loss0.012-|Sample:9.35|
EPOCH[326/1000] loss0.012-|Sample:8.89|
EPOCH[327/1000] loss0.012-|Sample:9.28|
EPOCH[328/1000] loss0.012-|Sample:9.12|
EPOCH[329/1000] loss0.012-|Sample:9.06|
EPOCH[330/1000] loss0.012-|Sample:9.13|
[TEST]
{'precision': array([0.05408433]), 'recall': array([0.17791161]), 'ndcg': array([0.15087836])}
EPOCH[331/1000] loss0.012-|Sample:7.37|
EPOCH[332/1000] loss0.012-|Sample:9.20|
EPOCH[333/1000] loss0.012-|Sample:9.16|
EPOCH[334/1000] loss0.012-|Sample:9.09|
EPOCH[335/1000] loss0.012-|Sample:9.38|
EPOCH[336/1000] loss0.012-|Sample:9.23|
EPOCH[337/1000] loss0.012-|Sample:9.38|
EPOCH[338/1000] loss0.012-|Sample:9.25|
EPOCH[339/1000] loss0.012-|Sample:9.22|
EPOCH[340/1000] loss0.012-|Sample:9.00|
[TEST]
{'precision': array([0.05410108]), 'recall': array([0.17788504]), 'ndcg': array([0.15127244])}
EPOCH[341/1000] loss0.012-|Sample:8.98|
EPOCH[342/1000] loss0.012-|Sample:9.14|
EPOCH[343/1000] loss0.012-|Sample:9.36|
EPOCH[344/1000] loss0.012-|Sample:9.27|
EPOCH[345/1000] loss0.012-|Sample:9.18|
EPOCH[346/1000] loss0.012-|Sample:9.24|
EPOCH[347/1000] loss0.012-|Sample:9.13|
EPOCH[348/1000] loss0.012-|Sample:9.01|
EPOCH[349/1000] loss0.012-|Sample:9.29|
EPOCH[350/1000] loss0.012-|Sample:9.05|
[TEST]
{'precision': array([0.05429366]), 'recall': array([0.17857514]), 'ndcg': array([0.15170361])}
EPOCH[351/1000] loss0.012-|Sample:9.31|
EPOCH[352/1000] loss0.012-|Sample:9.48|
EPOCH[353/1000] loss0.012-|Sample:9.13|
EPOCH[354/1000] loss0.012-|Sample:9.20|
EPOCH[355/1000] loss0.012-|Sample:9.19|
EPOCH[356/1000] loss0.012-|Sample:9.08|
EPOCH[357/1000] loss0.012-|Sample:9.15|
EPOCH[358/1000] loss0.012-|Sample:9.35|
EPOCH[359/1000] loss0.012-|Sample:9.42|
EPOCH[360/1000] loss0.012-|Sample:9.33|
[TEST]
{'precision': array([0.05422835]), 'recall': array([0.17802112]), 'ndcg': array([0.15132022])}
EPOCH[361/1000] loss0.012-|Sample:9.39|
EPOCH[362/1000] loss0.012-|Sample:9.24|
EPOCH[363/1000] loss0.012-|Sample:9.14|
EPOCH[364/1000] loss0.012-|Sample:9.32|
EPOCH[365/1000] loss0.012-|Sample:9.21|
EPOCH[366/1000] loss0.012-|Sample:9.21|
EPOCH[367/1000] loss0.012-|Sample:9.40|
EPOCH[368/1000] loss0.012-|Sample:9.59|
EPOCH[369/1000] loss0.012-|Sample:9.13|
EPOCH[370/1000] loss0.012-|Sample:9.36|
[TEST]
{'precision': array([0.0543372]), 'recall': array([0.17834837]), 'ndcg': array([0.1515459])}
EPOCH[371/1000] loss0.012-|Sample:9.00|
EPOCH[372/1000] loss0.012-|Sample:9.33|
EPOCH[373/1000] loss0.012-|Sample:9.39|
EPOCH[374/1000] loss0.012-|Sample:9.13|
EPOCH[375/1000] loss0.012-|Sample:9.05|
EPOCH[376/1000] loss0.012-|Sample:9.14|
EPOCH[377/1000] loss0.012-|Sample:9.14|
EPOCH[378/1000] loss0.012-|Sample:9.17|
EPOCH[379/1000] loss0.012-|Sample:9.15|
EPOCH[380/1000] loss0.012-|Sample:9.10|
[TEST]
{'precision': array([0.0545147]), 'recall': array([0.17925312]), 'ndcg': array([0.15200009])}
EPOCH[381/1000] loss0.012-|Sample:8.36|
EPOCH[382/1000] loss0.012-|Sample:9.49|
EPOCH[383/1000] loss0.012-|Sample:9.03|
EPOCH[384/1000] loss0.012-|Sample:9.26|
EPOCH[385/1000] loss0.012-|Sample:9.35|
EPOCH[386/1000] loss0.012-|Sample:9.02|
EPOCH[387/1000] loss0.012-|Sample:9.31|
EPOCH[388/1000] loss0.012-|Sample:9.39|
EPOCH[389/1000] loss0.012-|Sample:9.33|
EPOCH[390/1000] loss0.012-|Sample:6.40|
[TEST]
{'precision': array([0.05450466]), 'recall': array([0.17885314]), 'ndcg': array([0.15182405])}
EPOCH[391/1000] loss0.012-|Sample:9.23|
EPOCH[392/1000] loss0.012-|Sample:9.17|
EPOCH[393/1000] loss0.012-|Sample:9.28|
EPOCH[394/1000] loss0.012-|Sample:9.05|
EPOCH[395/1000] loss0.012-|Sample:9.32|
EPOCH[396/1000] loss0.012-|Sample:9.15|
EPOCH[397/1000] loss0.012-|Sample:9.36|
EPOCH[398/1000] loss0.012-|Sample:9.26|
EPOCH[399/1000] loss0.012-|Sample:9.69|
EPOCH[400/1000] loss0.012-|Sample:9.09|
[TEST]
{'precision': array([0.05458001]), 'recall': array([0.17921691]), 'ndcg': array([0.15196425])}
EPOCH[401/1000] loss0.012-|Sample:8.59|
EPOCH[402/1000] loss0.012-|Sample:9.06|
EPOCH[403/1000] loss0.012-|Sample:9.38|
EPOCH[404/1000] loss0.012-|Sample:9.33|
EPOCH[405/1000] loss0.012-|Sample:9.10|
EPOCH[406/1000] loss0.012-|Sample:9.04|
EPOCH[407/1000] loss0.012-|Sample:9.17|
EPOCH[408/1000] loss0.012-|Sample:9.42|
EPOCH[409/1000] loss0.012-|Sample:9.26|
EPOCH[410/1000] loss0.012-|Sample:9.21|
[TEST]
{'precision': array([0.05451303]), 'recall': array([0.17884124]), 'ndcg': array([0.15182261])}
EPOCH[411/1000] loss0.012-|Sample:9.03|
EPOCH[412/1000] loss0.012-|Sample:9.02|
EPOCH[413/1000] loss0.012-|Sample:9.36|
EPOCH[414/1000] loss0.012-|Sample:9.27|
EPOCH[415/1000] loss0.012-|Sample:9.15|
EPOCH[416/1000] loss0.011-|Sample:6.59|
EPOCH[417/1000] loss0.012-|Sample:9.35|
EPOCH[418/1000] loss0.012-|Sample:9.29|
EPOCH[419/1000] loss0.012-|Sample:9.42|
EPOCH[420/1000] loss0.012-|Sample:9.18|
[TEST]
{'precision': array([0.05468049]), 'recall': array([0.17918029]), 'ndcg': array([0.15234185])}
EPOCH[421/1000] loss0.012-|Sample:9.29|
EPOCH[422/1000] loss0.011-|Sample:9.08|
EPOCH[423/1000] loss0.012-|Sample:9.51|
EPOCH[424/1000] loss0.011-|Sample:9.20|
EPOCH[425/1000] loss0.012-|Sample:9.03|
EPOCH[426/1000] loss0.012-|Sample:9.52|
EPOCH[427/1000] loss0.012-|Sample:9.56|
EPOCH[428/1000] loss0.012-|Sample:9.18|
EPOCH[429/1000] loss0.011-|Sample:9.31|
EPOCH[430/1000] loss0.012-|Sample:9.11|
[TEST]
{'precision': array([0.05480441]), 'recall': array([0.17960428]), 'ndcg': array([0.15241548])}
EPOCH[431/1000] loss0.012-|Sample:9.17|
EPOCH[432/1000] loss0.012-|Sample:9.08|
EPOCH[433/1000] loss0.011-|Sample:9.02|
EPOCH[434/1000] loss0.011-|Sample:9.40|
EPOCH[435/1000] loss0.011-|Sample:9.05|
EPOCH[436/1000] loss0.012-|Sample:9.18|
EPOCH[437/1000] loss0.011-|Sample:9.24|
EPOCH[438/1000] loss0.012-|Sample:9.08|
EPOCH[439/1000] loss0.012-|Sample:9.35|
EPOCH[440/1000] loss0.012-|Sample:9.16|
[TEST]
{'precision': array([0.05472403]), 'recall': array([0.179398]), 'ndcg': array([0.15232087])}
EPOCH[441/1000] loss0.011-|Sample:9.45|
EPOCH[442/1000] loss0.011-|Sample:9.26|
EPOCH[443/1000] loss0.011-|Sample:9.38|
EPOCH[444/1000] loss0.012-|Sample:9.25|
EPOCH[445/1000] loss0.011-|Sample:7.03|
EPOCH[446/1000] loss0.011-|Sample:9.12|
EPOCH[447/1000] loss0.011-|Sample:9.28|
EPOCH[448/1000] loss0.012-|Sample:9.13|
EPOCH[449/1000] loss0.012-|Sample:9.28|
EPOCH[450/1000] loss0.011-|Sample:9.42|
[TEST]
{'precision': array([0.05485465]), 'recall': array([0.1797453]), 'ndcg': array([0.15258222])}
EPOCH[451/1000] loss0.012-|Sample:9.34|
EPOCH[452/1000] loss0.011-|Sample:9.22|
EPOCH[453/1000] loss0.011-|Sample:9.29|
EPOCH[454/1000] loss0.011-|Sample:9.29|
EPOCH[455/1000] loss0.012-|Sample:9.45|
EPOCH[456/1000] loss0.011-|Sample:9.31|
EPOCH[457/1000] loss0.011-|Sample:9.20|
EPOCH[458/1000] loss0.011-|Sample:9.09|
EPOCH[459/1000] loss0.011-|Sample:9.20|
EPOCH[460/1000] loss0.012-|Sample:8.17|
[TEST]
{'precision': array([0.05485632]), 'recall': array([0.1795455]), 'ndcg': array([0.15242329])}
EPOCH[461/1000] loss0.012-|Sample:9.25|
EPOCH[462/1000] loss0.012-|Sample:7.36|
EPOCH[463/1000] loss0.011-|Sample:9.30|
EPOCH[464/1000] loss0.012-|Sample:9.29|
EPOCH[465/1000] loss0.012-|Sample:8.98|
EPOCH[466/1000] loss0.011-|Sample:9.68|
EPOCH[467/1000] loss0.011-|Sample:9.40|
EPOCH[468/1000] loss0.011-|Sample:9.24|
EPOCH[469/1000] loss0.011-|Sample:8.02|
EPOCH[470/1000] loss0.011-|Sample:9.25|
[TEST]
{'precision': array([0.05476254]), 'recall': array([0.1793348]), 'ndcg': array([0.15237184])}
EPOCH[471/1000] loss0.011-|Sample:9.34|
EPOCH[472/1000] loss0.011-|Sample:9.34|
EPOCH[473/1000] loss0.012-|Sample:9.10|
EPOCH[474/1000] loss0.011-|Sample:9.24|
EPOCH[475/1000] loss0.011-|Sample:9.52|
EPOCH[476/1000] loss0.011-|Sample:9.22|
EPOCH[477/1000] loss0.011-|Sample:9.10|
EPOCH[478/1000] loss0.011-|Sample:9.34|
EPOCH[479/1000] loss0.011-|Sample:9.40|
EPOCH[480/1000] loss0.011-|Sample:9.31|
[TEST]
{'precision': array([0.05484627]), 'recall': array([0.17955187]), 'ndcg': array([0.15269909])}
EPOCH[481/1000] loss0.011-|Sample:9.18|
EPOCH[482/1000] loss0.011-|Sample:9.01|
EPOCH[483/1000] loss0.011-|Sample:9.36|
EPOCH[484/1000] loss0.011-|Sample:7.73|
EPOCH[485/1000] loss0.011-|Sample:9.24|
EPOCH[486/1000] loss0.011-|Sample:9.28|
EPOCH[487/1000] loss0.011-|Sample:9.16|
EPOCH[488/1000] loss0.011-|Sample:9.12|
EPOCH[489/1000] loss0.011-|Sample:9.13|
EPOCH[490/1000] loss0.011-|Sample:9.23|
[TEST]
{'precision': array([0.05485967]), 'recall': array([0.17937952]), 'ndcg': array([0.15258982])}
EPOCH[491/1000] loss0.011-|Sample:9.09|
EPOCH[492/1000] loss0.011-|Sample:9.07|
EPOCH[493/1000] loss0.011-|Sample:9.08|
EPOCH[494/1000] loss0.011-|Sample:9.38|
EPOCH[495/1000] loss0.011-|Sample:9.10|
EPOCH[496/1000] loss0.011-|Sample:9.23|
EPOCH[497/1000] loss0.011-|Sample:9.26|
EPOCH[498/1000] loss0.011-|Sample:9.12|
EPOCH[499/1000] loss0.011-|Sample:9.06|
EPOCH[500/1000] loss0.011-|Sample:9.27|
[TEST]
{'precision': array([0.05504053]), 'recall': array([0.17983103]), 'ndcg': array([0.1531194])}
EPOCH[501/1000] loss0.011-|Sample:9.21|
EPOCH[502/1000] loss0.011-|Sample:9.20|
EPOCH[503/1000] loss0.011-|Sample:9.53|
EPOCH[504/1000] loss0.011-|Sample:9.22|
EPOCH[505/1000] loss0.011-|Sample:9.29|
EPOCH[506/1000] loss0.011-|Sample:7.48|
EPOCH[507/1000] loss0.011-|Sample:9.29|
EPOCH[508/1000] loss0.011-|Sample:9.09|
EPOCH[509/1000] loss0.011-|Sample:9.00|
EPOCH[510/1000] loss0.011-|Sample:9.08|
[TEST]
{'precision': array([0.0550489]), 'recall': array([0.17995812]), 'ndcg': array([0.15266461])}
EPOCH[511/1000] loss0.011-|Sample:9.28|
EPOCH[512/1000] loss0.011-|Sample:9.38|
EPOCH[513/1000] loss0.011-|Sample:9.21|
EPOCH[514/1000] loss0.011-|Sample:9.15|
EPOCH[515/1000] loss0.011-|Sample:9.19|
EPOCH[516/1000] loss0.011-|Sample:9.05|
EPOCH[517/1000] loss0.011-|Sample:9.27|
EPOCH[518/1000] loss0.011-|Sample:8.86|
EPOCH[519/1000] loss0.011-|Sample:9.19|
EPOCH[520/1000] loss0.011-|Sample:9.29|
[TEST]
{'precision': array([0.0551544]), 'recall': array([0.18028717]), 'ndcg': array([0.15276841])}
EPOCH[521/1000] loss0.011-|Sample:9.25|
EPOCH[522/1000] loss0.011-|Sample:9.17|
EPOCH[523/1000] loss0.011-|Sample:8.22|
EPOCH[524/1000] loss0.011-|Sample:9.18|
EPOCH[525/1000] loss0.011-|Sample:9.11|
EPOCH[526/1000] loss0.011-|Sample:9.04|
EPOCH[527/1000] loss0.011-|Sample:9.05|
EPOCH[528/1000] loss0.011-|Sample:9.11|
EPOCH[529/1000] loss0.011-|Sample:9.07|
EPOCH[530/1000] loss0.011-|Sample:9.38|
[TEST]
{'precision': array([0.05516947]), 'recall': array([0.1803097]), 'ndcg': array([0.15305578])}
EPOCH[531/1000] loss0.011-|Sample:9.30|
EPOCH[532/1000] loss0.011-|Sample:8.38|
EPOCH[533/1000] loss0.011-|Sample:9.45|
EPOCH[534/1000] loss0.011-|Sample:9.16|
EPOCH[535/1000] loss0.011-|Sample:9.31|
EPOCH[536/1000] loss0.011-|Sample:9.23|
EPOCH[537/1000] loss0.011-|Sample:9.21|
EPOCH[538/1000] loss0.011-|Sample:9.27|
EPOCH[539/1000] loss0.011-|Sample:9.29|
EPOCH[540/1000] loss0.011-|Sample:9.22|
[TEST]
{'precision': array([0.05518287]), 'recall': array([0.18031628]), 'ndcg': array([0.15287633])}
EPOCH[541/1000] loss0.011-|Sample:9.21|
EPOCH[542/1000] loss0.011-|Sample:9.43|
EPOCH[543/1000] loss0.011-|Sample:9.10|
EPOCH[544/1000] loss0.011-|Sample:9.32|
EPOCH[545/1000] loss0.011-|Sample:9.36|
EPOCH[546/1000] loss0.011-|Sample:9.50|
EPOCH[547/1000] loss0.011-|Sample:7.36|
EPOCH[548/1000] loss0.011-|Sample:9.41|
EPOCH[549/1000] loss0.011-|Sample:9.17|
EPOCH[550/1000] loss0.011-|Sample:9.28|
[TEST]
{'precision': array([0.05540056]), 'recall': array([0.1809771]), 'ndcg': array([0.15299198])}
EPOCH[551/1000] loss0.011-|Sample:9.27|
EPOCH[552/1000] loss0.011-|Sample:9.43|
EPOCH[553/1000] loss0.011-|Sample:9.08|
EPOCH[554/1000] loss0.011-|Sample:9.32|
EPOCH[555/1000] loss0.011-|Sample:9.34|
EPOCH[556/1000] loss0.011-|Sample:7.44|
EPOCH[557/1000] loss0.011-|Sample:9.19|
EPOCH[558/1000] loss0.011-|Sample:9.09|
EPOCH[559/1000] loss0.011-|Sample:9.29|
EPOCH[560/1000] loss0.011-|Sample:9.04|
[TEST]
{'precision': array([0.0552398]), 'recall': array([0.18030992]), 'ndcg': array([0.15297437])}
EPOCH[561/1000] loss0.011-|Sample:9.16|
EPOCH[562/1000] loss0.011-|Sample:9.23|
EPOCH[563/1000] loss0.011-|Sample:9.25|
EPOCH[564/1000] loss0.011-|Sample:9.20|
EPOCH[565/1000] loss0.011-|Sample:9.42|
EPOCH[566/1000] loss0.011-|Sample:9.27|
EPOCH[567/1000] loss0.011-|Sample:9.25|
EPOCH[568/1000] loss0.011-|Sample:9.21|
EPOCH[569/1000] loss0.011-|Sample:9.30|
EPOCH[570/1000] loss0.011-|Sample:9.32|
[TEST]
{'precision': array([0.05513263]), 'recall': array([0.18009406]), 'ndcg': array([0.15286301])}
EPOCH[571/1000] loss0.011-|Sample:7.38|
EPOCH[572/1000] loss0.011-|Sample:9.13|
EPOCH[573/1000] loss0.011-|Sample:9.23|
EPOCH[574/1000] loss0.011-|Sample:9.27|
EPOCH[575/1000] loss0.011-|Sample:9.11|
EPOCH[576/1000] loss0.011-|Sample:9.30|
EPOCH[577/1000] loss0.011-|Sample:9.30|
EPOCH[578/1000] loss0.011-|Sample:9.20|
EPOCH[579/1000] loss0.011-|Sample:9.12|
EPOCH[580/1000] loss0.011-|Sample:6.61|
[TEST]
{'precision': array([0.05528502]), 'recall': array([0.18052941]), 'ndcg': array([0.1530037])}
EPOCH[581/1000] loss0.011-|Sample:9.34|
EPOCH[582/1000] loss0.011-|Sample:9.45|
EPOCH[583/1000] loss0.011-|Sample:9.30|
EPOCH[584/1000] loss0.011-|Sample:8.14|
EPOCH[585/1000] loss0.011-|Sample:9.16|
EPOCH[586/1000] loss0.011-|Sample:9.35|
EPOCH[587/1000] loss0.011-|Sample:9.00|
EPOCH[588/1000] loss0.011-|Sample:9.19|
EPOCH[589/1000] loss0.011-|Sample:9.22|
EPOCH[590/1000] loss0.011-|Sample:9.00|
[TEST]
{'precision': array([0.05541898]), 'recall': array([0.18079508]), 'ndcg': array([0.15338636])}
EPOCH[591/1000] loss0.011-|Sample:9.33|
EPOCH[592/1000] loss0.011-|Sample:9.17|
EPOCH[593/1000] loss0.011-|Sample:6.40|
EPOCH[594/1000] loss0.011-|Sample:9.15|
EPOCH[595/1000] loss0.011-|Sample:9.53|
EPOCH[596/1000] loss0.011-|Sample:9.40|
EPOCH[597/1000] loss0.011-|Sample:9.29|
EPOCH[598/1000] loss0.011-|Sample:9.20|
EPOCH[599/1000] loss0.011-|Sample:9.43|
EPOCH[600/1000] loss0.011-|Sample:9.33|
[TEST]
{'precision': array([0.05524985]), 'recall': array([0.18060806]), 'ndcg': array([0.15340144])}
EPOCH[601/1000] loss0.011-|Sample:9.24|
EPOCH[602/1000] loss0.011-|Sample:9.30|
EPOCH[603/1000] loss0.011-|Sample:9.08|
EPOCH[604/1000] loss0.011-|Sample:9.25|
EPOCH[605/1000] loss0.011-|Sample:9.18|
EPOCH[606/1000] loss0.011-|Sample:9.24|
EPOCH[607/1000] loss0.011-|Sample:9.25|
EPOCH[608/1000] loss0.011-|Sample:7.93|
EPOCH[609/1000] loss0.011-|Sample:9.36|
EPOCH[610/1000] loss0.011-|Sample:9.31|
[TEST]
{'precision': array([0.05536875]), 'recall': array([0.18057289]), 'ndcg': array([0.1535376])}
EPOCH[611/1000] loss0.011-|Sample:9.15|
EPOCH[612/1000] loss0.011-|Sample:9.54|
EPOCH[613/1000] loss0.011-|Sample:9.22|
EPOCH[614/1000] loss0.011-|Sample:9.30|
EPOCH[615/1000] loss0.011-|Sample:9.23|
EPOCH[616/1000] loss0.011-|Sample:9.29|
EPOCH[617/1000] loss0.011-|Sample:6.48|
EPOCH[618/1000] loss0.011-|Sample:9.29|
EPOCH[619/1000] loss0.011-|Sample:9.21|
EPOCH[620/1000] loss0.011-|Sample:9.29|
[TEST]
{'precision': array([0.05546085]), 'recall': array([0.18107392]), 'ndcg': array([0.15341526])}
EPOCH[621/1000] loss0.011-|Sample:6.58|
EPOCH[622/1000] loss0.011-|Sample:9.21|
EPOCH[623/1000] loss0.011-|Sample:9.24|
EPOCH[624/1000] loss0.011-|Sample:9.55|
EPOCH[625/1000] loss0.011-|Sample:9.19|
EPOCH[626/1000] loss0.011-|Sample:9.32|
EPOCH[627/1000] loss0.011-|Sample:9.30|
EPOCH[628/1000] loss0.011-|Sample:9.38|
EPOCH[629/1000] loss0.011-|Sample:9.42|
EPOCH[630/1000] loss0.011-|Sample:9.18|
[TEST]
{'precision': array([0.05546587]), 'recall': array([0.18090412]), 'ndcg': array([0.15346613])}
EPOCH[631/1000] loss0.011-|Sample:9.34|
EPOCH[632/1000] loss0.011-|Sample:9.26|
EPOCH[633/1000] loss0.011-|Sample:9.28|
EPOCH[634/1000] loss0.011-|Sample:9.35|
EPOCH[635/1000] loss0.011-|Sample:9.24|
EPOCH[636/1000] loss0.011-|Sample:7.44|
EPOCH[637/1000] loss0.011-|Sample:9.25|
EPOCH[638/1000] loss0.011-|Sample:9.07|
EPOCH[639/1000] loss0.011-|Sample:9.30|
EPOCH[640/1000] loss0.011-|Sample:9.15|
[TEST]
{'precision': array([0.05560151]), 'recall': array([0.18082431]), 'ndcg': array([0.15389678])}
EPOCH[641/1000] loss0.011-|Sample:9.25|
EPOCH[642/1000] loss0.011-|Sample:8.92|
EPOCH[643/1000] loss0.011-|Sample:9.23|
EPOCH[644/1000] loss0.011-|Sample:9.24|
EPOCH[645/1000] loss0.011-|Sample:8.90|
EPOCH[646/1000] loss0.011-|Sample:9.00|
EPOCH[647/1000] loss0.011-|Sample:9.20|
EPOCH[648/1000] loss0.011-|Sample:9.01|
EPOCH[649/1000] loss0.011-|Sample:9.27|
EPOCH[650/1000] loss0.011-|Sample:9.42|
[TEST]
{'precision': array([0.05549099]), 'recall': array([0.18074413]), 'ndcg': array([0.15368121])}
EPOCH[651/1000] loss0.011-|Sample:9.07|
EPOCH[652/1000] loss0.011-|Sample:9.17|
EPOCH[653/1000] loss0.011-|Sample:9.22|
EPOCH[654/1000] loss0.011-|Sample:9.22|
EPOCH[655/1000] loss0.011-|Sample:9.14|
EPOCH[656/1000] loss0.011-|Sample:9.29|
EPOCH[657/1000] loss0.011-|Sample:9.14|
EPOCH[658/1000] loss0.011-|Sample:7.48|
EPOCH[659/1000] loss0.011-|Sample:9.37|
EPOCH[660/1000] loss0.011-|Sample:9.11|
[TEST]
{'precision': array([0.05557137]), 'recall': array([0.18110007]), 'ndcg': array([0.15375468])}
EPOCH[661/1000] loss0.011-|Sample:9.12|
EPOCH[662/1000] loss0.011-|Sample:9.12|
EPOCH[663/1000] loss0.011-|Sample:9.31|
EPOCH[664/1000] loss0.011-|Sample:9.34|
EPOCH[665/1000] loss0.011-|Sample:9.23|
EPOCH[666/1000] loss0.011-|Sample:9.24|
EPOCH[667/1000] loss0.011-|Sample:9.38|
EPOCH[668/1000] loss0.011-|Sample:9.23|
EPOCH[669/1000] loss0.011-|Sample:9.34|
EPOCH[670/1000] loss0.011-|Sample:9.15|
[TEST]
{'precision': array([0.05546252]), 'recall': array([0.18097493]), 'ndcg': array([0.1538397])}
EPOCH[671/1000] loss0.011-|Sample:9.16|
EPOCH[672/1000] loss0.011-|Sample:9.42|
EPOCH[673/1000] loss0.011-|Sample:9.18|
EPOCH[674/1000] loss0.011-|Sample:9.21|
EPOCH[675/1000] loss0.011-|Sample:9.41|
EPOCH[676/1000] loss0.011-|Sample:9.23|
EPOCH[677/1000] loss0.011-|Sample:9.36|
EPOCH[678/1000] loss0.011-|Sample:9.22|
EPOCH[679/1000] loss0.011-|Sample:9.33|
EPOCH[680/1000] loss0.011-|Sample:7.49|
[TEST]
{'precision': array([0.05561993]), 'recall': array([0.18129769]), 'ndcg': array([0.15409599])}
EPOCH[681/1000] loss0.011-|Sample:9.32|
EPOCH[682/1000] loss0.011-|Sample:9.24|
EPOCH[683/1000] loss0.011-|Sample:9.29|
EPOCH[684/1000] loss0.011-|Sample:9.38|
EPOCH[685/1000] loss0.011-|Sample:9.35|
EPOCH[686/1000] loss0.011-|Sample:9.21|
EPOCH[687/1000] loss0.011-|Sample:9.30|
EPOCH[688/1000] loss0.011-|Sample:9.19|
EPOCH[689/1000] loss0.011-|Sample:9.22|
EPOCH[690/1000] loss0.011-|Sample:9.52|
[TEST]
{'precision': array([0.05553788]), 'recall': array([0.18085781]), 'ndcg': array([0.15384804])}
EPOCH[691/1000] loss0.011-|Sample:9.03|
EPOCH[692/1000] loss0.011-|Sample:9.48|
EPOCH[693/1000] loss0.011-|Sample:9.25|
EPOCH[694/1000] loss0.011-|Sample:9.28|
EPOCH[695/1000] loss0.011-|Sample:8.91|
EPOCH[696/1000] loss0.011-|Sample:9.37|
EPOCH[697/1000] loss0.011-|Sample:7.95|
EPOCH[698/1000] loss0.011-|Sample:9.22|
EPOCH[699/1000] loss0.011-|Sample:9.24|
EPOCH[700/1000] loss0.011-|Sample:9.16|
[TEST]
{'precision': array([0.05549434]), 'recall': array([0.18119291]), 'ndcg': array([0.1538351])}
EPOCH[701/1000] loss0.011-|Sample:7.76|
EPOCH[702/1000] loss0.011-|Sample:9.58|
EPOCH[703/1000] loss0.011-|Sample:9.12|
EPOCH[704/1000] loss0.011-|Sample:9.26|
EPOCH[705/1000] loss0.011-|Sample:8.94|
EPOCH[706/1000] loss0.011-|Sample:6.45|
EPOCH[707/1000] loss0.011-|Sample:9.39|
EPOCH[708/1000] loss0.011-|Sample:9.20|
EPOCH[709/1000] loss0.011-|Sample:9.29|
EPOCH[710/1000] loss0.011-|Sample:9.22|
[TEST]
{'precision': array([0.0556417]), 'recall': array([0.18150559]), 'ndcg': array([0.15418361])}
EPOCH[711/1000] loss0.011-|Sample:9.49|
EPOCH[712/1000] loss0.011-|Sample:9.35|
EPOCH[713/1000] loss0.011-|Sample:9.15|
EPOCH[714/1000] loss0.011-|Sample:9.41|
EPOCH[715/1000] loss0.011-|Sample:9.34|
EPOCH[716/1000] loss0.011-|Sample:9.28|
EPOCH[717/1000] loss0.011-|Sample:9.31|
EPOCH[718/1000] loss0.011-|Sample:9.11|
EPOCH[719/1000] loss0.011-|Sample:9.15|
EPOCH[720/1000] loss0.011-|Sample:9.15|
[TEST]
{'precision': array([0.05572543]), 'recall': array([0.18195793]), 'ndcg': array([0.15428026])}
EPOCH[721/1000] loss0.011-|Sample:9.05|
EPOCH[722/1000] loss0.011-|Sample:9.35|
EPOCH[723/1000] loss0.011-|Sample:7.49|
EPOCH[724/1000] loss0.011-|Sample:9.34|
EPOCH[725/1000] loss0.011-|Sample:9.41|
EPOCH[726/1000] loss0.011-|Sample:9.06|
EPOCH[727/1000] loss0.011-|Sample:9.15|
EPOCH[728/1000] loss0.011-|Sample:9.23|
EPOCH[729/1000] loss0.011-|Sample:9.13|
EPOCH[730/1000] loss0.011-|Sample:8.67|
[TEST]
{'precision': array([0.05568692]), 'recall': array([0.1818983]), 'ndcg': array([0.15397171])}
EPOCH[731/1000] loss0.011-|Sample:9.09|
EPOCH[732/1000] loss0.011-|Sample:9.01|
EPOCH[733/1000] loss0.011-|Sample:9.36|
EPOCH[734/1000] loss0.011-|Sample:9.48|
EPOCH[735/1000] loss0.011-|Sample:9.19|
EPOCH[736/1000] loss0.011-|Sample:9.28|
EPOCH[737/1000] loss0.011-|Sample:9.20|
EPOCH[738/1000] loss0.011-|Sample:9.23|
EPOCH[739/1000] loss0.011-|Sample:9.26|
EPOCH[740/1000] loss0.011-|Sample:9.34|
[TEST]
{'precision': array([0.05559984]), 'recall': array([0.18161216]), 'ndcg': array([0.15379147])}
EPOCH[741/1000] loss0.011-|Sample:9.14|
EPOCH[742/1000] loss0.011-|Sample:9.49|
EPOCH[743/1000] loss0.011-|Sample:9.32|
EPOCH[744/1000] loss0.011-|Sample:9.24|
EPOCH[745/1000] loss0.011-|Sample:7.35|
EPOCH[746/1000] loss0.011-|Sample:9.32|
EPOCH[747/1000] loss0.011-|Sample:9.33|
EPOCH[748/1000] loss0.011-|Sample:9.13|
EPOCH[749/1000] loss0.011-|Sample:9.35|
EPOCH[750/1000] loss0.011-|Sample:9.04|
[TEST]
{'precision': array([0.05558812]), 'recall': array([0.18126234]), 'ndcg': array([0.15370992])}
EPOCH[751/1000] loss0.011-|Sample:9.43|
EPOCH[752/1000] loss0.011-|Sample:9.23|
EPOCH[753/1000] loss0.011-|Sample:9.48|
EPOCH[754/1000] loss0.011-|Sample:9.36|
EPOCH[755/1000] loss0.011-|Sample:9.15|
EPOCH[756/1000] loss0.011-|Sample:9.03|
EPOCH[757/1000] loss0.011-|Sample:9.20|
EPOCH[758/1000] loss0.011-|Sample:9.35|
EPOCH[759/1000] loss0.011-|Sample:9.31|
EPOCH[760/1000] loss0.011-|Sample:9.35|
[TEST]
{'precision': array([0.05557305]), 'recall': array([0.18141109]), 'ndcg': array([0.15391371])}
EPOCH[761/1000] loss0.011-|Sample:9.01|
EPOCH[762/1000] loss0.011-|Sample:8.98|
EPOCH[763/1000] loss0.011-|Sample:9.36|
EPOCH[764/1000] loss0.011-|Sample:9.38|
EPOCH[765/1000] loss0.011-|Sample:9.16|
EPOCH[766/1000] loss0.011-|Sample:9.04|
EPOCH[767/1000] loss0.011-|Sample:7.45|
EPOCH[768/1000] loss0.011-|Sample:9.45|
EPOCH[769/1000] loss0.011-|Sample:9.29|
EPOCH[770/1000] loss0.011-|Sample:9.35|
[TEST]
{'precision': array([0.05554793]), 'recall': array([0.181031]), 'ndcg': array([0.15409379])}
EPOCH[771/1000] loss0.011-|Sample:9.17|
EPOCH[772/1000] loss0.011-|Sample:9.23|
EPOCH[773/1000] loss0.011-|Sample:9.16|
EPOCH[774/1000] loss0.011-|Sample:9.32|
EPOCH[775/1000] loss0.011-|Sample:8.98|
EPOCH[776/1000] loss0.011-|Sample:9.25|
EPOCH[777/1000] loss0.011-|Sample:9.19|
EPOCH[778/1000] loss0.011-|Sample:9.51|
EPOCH[779/1000] loss0.011-|Sample:9.44|
EPOCH[780/1000] loss0.011-|Sample:9.30|
[TEST]
{'precision': array([0.05553453]), 'recall': array([0.18095204]), 'ndcg': array([0.1541018])}
EPOCH[781/1000] loss0.011-|Sample:9.08|
EPOCH[782/1000] loss0.011-|Sample:9.19|
EPOCH[783/1000] loss0.011-|Sample:9.34|
EPOCH[784/1000] loss0.011-|Sample:9.30|
EPOCH[785/1000] loss0.011-|Sample:9.35|
EPOCH[786/1000] loss0.011-|Sample:9.70|
EPOCH[787/1000] loss0.011-|Sample:9.22|
EPOCH[788/1000] loss0.011-|Sample:9.21|
EPOCH[789/1000] loss0.011-|Sample:9.38|
EPOCH[790/1000] loss0.011-|Sample:9.23|
[TEST]
{'precision': array([0.05568859]), 'recall': array([0.18163281]), 'ndcg': array([0.15441417])}
EPOCH[791/1000] loss0.011-|Sample:9.65|
EPOCH[792/1000] loss0.011-|Sample:9.56|
EPOCH[793/1000] loss0.011-|Sample:9.15|
EPOCH[794/1000] loss0.011-|Sample:9.17|
EPOCH[795/1000] loss0.011-|Sample:9.12|
EPOCH[796/1000] loss0.011-|Sample:9.00|
EPOCH[797/1000] loss0.011-|Sample:9.46|
EPOCH[798/1000] loss0.011-|Sample:9.16|
EPOCH[799/1000] loss0.011-|Sample:9.50|
EPOCH[800/1000] loss0.011-|Sample:9.19|
[TEST]
{'precision': array([0.05579074]), 'recall': array([0.18177159]), 'ndcg': array([0.15426509])}
EPOCH[801/1000] loss0.011-|Sample:9.01|
EPOCH[802/1000] loss0.011-|Sample:9.00|
EPOCH[803/1000] loss0.011-|Sample:9.60|
EPOCH[804/1000] loss0.011-|Sample:9.14|
EPOCH[805/1000] loss0.011-|Sample:9.08|
EPOCH[806/1000] loss0.011-|Sample:9.11|
EPOCH[807/1000] loss0.011-|Sample:9.20|
EPOCH[808/1000] loss0.011-|Sample:9.21|
EPOCH[809/1000] loss0.011-|Sample:9.07|
EPOCH[810/1000] loss0.011-|Sample:9.46|
[TEST]
{'precision': array([0.05559314]), 'recall': array([0.18136021]), 'ndcg': array([0.15400284])}
EPOCH[811/1000] loss0.011-|Sample:9.07|
EPOCH[812/1000] loss0.011-|Sample:9.29|
EPOCH[813/1000] loss0.011-|Sample:9.44|
EPOCH[814/1000] loss0.011-|Sample:9.08|
EPOCH[815/1000] loss0.011-|Sample:6.71|
EPOCH[816/1000] loss0.011-|Sample:9.28|
EPOCH[817/1000] loss0.011-|Sample:9.30|
EPOCH[818/1000] loss0.011-|Sample:9.34|
EPOCH[819/1000] loss0.011-|Sample:9.39|
EPOCH[820/1000] loss0.011-|Sample:9.12|
[TEST]
{'precision': array([0.05561491]), 'recall': array([0.18109602]), 'ndcg': array([0.15397581])}
EPOCH[821/1000] loss0.011-|Sample:9.25|
EPOCH[822/1000] loss0.011-|Sample:9.07|
EPOCH[823/1000] loss0.011-|Sample:9.22|
EPOCH[824/1000] loss0.011-|Sample:9.21|
EPOCH[825/1000] loss0.011-|Sample:9.04|
EPOCH[826/1000] loss0.011-|Sample:9.43|
EPOCH[827/1000] loss0.011-|Sample:9.24|
EPOCH[828/1000] loss0.011-|Sample:9.13|
EPOCH[829/1000] loss0.011-|Sample:9.17|
EPOCH[830/1000] loss0.011-|Sample:8.44|
[TEST]
{'precision': array([0.05573883]), 'recall': array([0.18182691]), 'ndcg': array([0.15417156])}
EPOCH[831/1000] loss0.011-|Sample:9.09|
EPOCH[832/1000] loss0.011-|Sample:7.42|
EPOCH[833/1000] loss0.011-|Sample:9.26|
EPOCH[834/1000] loss0.011-|Sample:9.37|
EPOCH[835/1000] loss0.011-|Sample:9.08|
EPOCH[836/1000] loss0.011-|Sample:9.51|
EPOCH[837/1000] loss0.011-|Sample:9.32|
EPOCH[838/1000] loss0.011-|Sample:9.34|
EPOCH[839/1000] loss0.011-|Sample:8.15|
EPOCH[840/1000] loss0.011-|Sample:9.31|
[TEST]
{'precision': array([0.05572543]), 'recall': array([0.18140161]), 'ndcg': array([0.15392334])}
EPOCH[841/1000] loss0.011-|Sample:9.26|
EPOCH[842/1000] loss0.011-|Sample:9.14|
EPOCH[843/1000] loss0.011-|Sample:9.37|
EPOCH[844/1000] loss0.011-|Sample:9.31|
EPOCH[845/1000] loss0.011-|Sample:9.27|
EPOCH[846/1000] loss0.011-|Sample:9.19|
EPOCH[847/1000] loss0.011-|Sample:9.32|
EPOCH[848/1000] loss0.011-|Sample:9.33|
EPOCH[849/1000] loss0.011-|Sample:9.34|
EPOCH[850/1000] loss0.011-|Sample:9.32|
[TEST]
{'precision': array([0.05568022]), 'recall': array([0.18175994]), 'ndcg': array([0.15396197])}
EPOCH[851/1000] loss0.011-|Sample:9.01|
EPOCH[852/1000] loss0.011-|Sample:9.27|
EPOCH[853/1000] loss0.011-|Sample:9.26|
EPOCH[854/1000] loss0.011-|Sample:7.46|
EPOCH[855/1000] loss0.011-|Sample:9.19|
EPOCH[856/1000] loss0.011-|Sample:9.29|
EPOCH[857/1000] loss0.011-|Sample:9.03|
EPOCH[858/1000] loss0.011-|Sample:9.45|
EPOCH[859/1000] loss0.011-|Sample:9.23|
EPOCH[860/1000] loss0.011-|Sample:8.98|
[TEST]
{'precision': array([0.05570869]), 'recall': array([0.18154495]), 'ndcg': array([0.15421102])}
EPOCH[861/1000] loss0.011-|Sample:9.13|
EPOCH[862/1000] loss0.011-|Sample:9.24|
EPOCH[863/1000] loss0.011-|Sample:9.27|
EPOCH[864/1000] loss0.011-|Sample:9.04|
EPOCH[865/1000] loss0.011-|Sample:9.13|
EPOCH[866/1000] loss0.011-|Sample:9.06|
EPOCH[867/1000] loss0.011-|Sample:9.27|
EPOCH[868/1000] loss0.011-|Sample:9.21|
EPOCH[869/1000] loss0.011-|Sample:8.98|
EPOCH[870/1000] loss0.011-|Sample:9.26|
[TEST]
{'precision': array([0.05573548]), 'recall': array([0.18154573]), 'ndcg': array([0.15427561])}
EPOCH[871/1000] loss0.011-|Sample:9.09|
EPOCH[872/1000] loss0.011-|Sample:9.21|
EPOCH[873/1000] loss0.011-|Sample:8.96|
EPOCH[874/1000] loss0.011-|Sample:9.20|
EPOCH[875/1000] loss0.011-|Sample:9.00|
EPOCH[876/1000] loss0.011-|Sample:7.52|
EPOCH[877/1000] loss0.011-|Sample:9.09|
EPOCH[878/1000] loss0.011-|Sample:8.86|
EPOCH[879/1000] loss0.011-|Sample:9.26|
EPOCH[880/1000] loss0.011-|Sample:9.12|
[TEST]
{'precision': array([0.05581754]), 'recall': array([0.18161262]), 'ndcg': array([0.15429218])}
EPOCH[881/1000] loss0.011-|Sample:9.28|
EPOCH[882/1000] loss0.011-|Sample:8.93|
EPOCH[883/1000] loss0.011-|Sample:9.43|
EPOCH[884/1000] loss0.011-|Sample:9.45|
EPOCH[885/1000] loss0.011-|Sample:8.18|
EPOCH[886/1000] loss0.011-|Sample:9.15|
EPOCH[887/1000] loss0.011-|Sample:9.47|
EPOCH[888/1000] loss0.011-|Sample:9.23|
EPOCH[889/1000] loss0.011-|Sample:9.24|
EPOCH[890/1000] loss0.011-|Sample:9.51|
[TEST]
{'precision': array([0.05590462]), 'recall': array([0.18192442]), 'ndcg': array([0.15456942])}
EPOCH[891/1000] loss0.011-|Sample:9.15|
EPOCH[892/1000] loss0.011-|Sample:9.02|
EPOCH[893/1000] loss0.011-|Sample:9.19|
EPOCH[894/1000] loss0.011-|Sample:9.37|
EPOCH[895/1000] loss0.011-|Sample:9.22|
EPOCH[896/1000] loss0.011-|Sample:9.15|
EPOCH[897/1000] loss0.011-|Sample:9.17|
EPOCH[898/1000] loss0.011-|Sample:7.44|
EPOCH[899/1000] loss0.011-|Sample:9.21|
EPOCH[900/1000] loss0.011-|Sample:9.29|
[TEST]
{'precision': array([0.05584266]), 'recall': array([0.18188239]), 'ndcg': array([0.15449034])}
EPOCH[901/1000] loss0.011-|Sample:8.96|
EPOCH[902/1000] loss0.011-|Sample:9.12|
EPOCH[903/1000] loss0.011-|Sample:9.42|
EPOCH[904/1000] loss0.011-|Sample:9.40|
EPOCH[905/1000] loss0.011-|Sample:9.09|
EPOCH[906/1000] loss0.011-|Sample:9.57|
EPOCH[907/1000] loss0.011-|Sample:9.44|
EPOCH[908/1000] loss0.011-|Sample:9.21|
EPOCH[909/1000] loss0.011-|Sample:7.27|
EPOCH[910/1000] loss0.011-|Sample:9.04|
[TEST]
{'precision': array([0.05582926]), 'recall': array([0.18184865]), 'ndcg': array([0.15435762])}
EPOCH[911/1000] loss0.011-|Sample:9.27|
EPOCH[912/1000] loss0.011-|Sample:9.21|
EPOCH[913/1000] loss0.011-|Sample:7.64|
EPOCH[914/1000] loss0.011-|Sample:9.35|
EPOCH[915/1000] loss0.011-|Sample:9.24|
EPOCH[916/1000] loss0.011-|Sample:9.20|
EPOCH[917/1000] loss0.011-|Sample:9.33|
EPOCH[918/1000] loss0.011-|Sample:9.29|
EPOCH[919/1000] loss0.011-|Sample:9.20|
EPOCH[920/1000] loss0.011-|Sample:8.23|
[TEST]
{'precision': array([0.05581084]), 'recall': array([0.18170741]), 'ndcg': array([0.15454048])}
EPOCH[921/1000] loss0.011-|Sample:9.16|
EPOCH[922/1000] loss0.011-|Sample:9.28|
EPOCH[923/1000] loss0.011-|Sample:9.10|
EPOCH[924/1000] loss0.011-|Sample:9.24|
EPOCH[925/1000] loss0.011-|Sample:9.20|
EPOCH[926/1000] loss0.011-|Sample:8.93|
EPOCH[927/1000] loss0.011-|Sample:9.23|
EPOCH[928/1000] loss0.011-|Sample:9.04|
EPOCH[929/1000] loss0.011-|Sample:9.08|
EPOCH[930/1000] loss0.011-|Sample:9.21|
[TEST]
{'precision': array([0.0558795]), 'recall': array([0.1817253]), 'ndcg': array([0.15443017])}
EPOCH[931/1000] loss0.011-|Sample:8.91|
EPOCH[932/1000] loss0.011-|Sample:8.94|
EPOCH[933/1000] loss0.011-|Sample:9.41|
EPOCH[934/1000] loss0.011-|Sample:8.98|
EPOCH[935/1000] loss0.011-|Sample:9.14|
EPOCH[936/1000] loss0.011-|Sample:9.17|
EPOCH[937/1000] loss0.011-|Sample:9.14|
EPOCH[938/1000] loss0.011-|Sample:9.12|
EPOCH[939/1000] loss0.011-|Sample:8.96|
EPOCH[940/1000] loss0.011-|Sample:8.99|
[TEST]
{'precision': array([0.0558728]), 'recall': array([0.18198035]), 'ndcg': array([0.1543351])}
EPOCH[941/1000] loss0.011-|Sample:9.23|
EPOCH[942/1000] loss0.011-|Sample:7.44|
EPOCH[943/1000] loss0.011-|Sample:9.31|
EPOCH[944/1000] loss0.011-|Sample:9.31|
EPOCH[945/1000] loss0.011-|Sample:9.14|
EPOCH[946/1000] loss0.011-|Sample:9.10|
EPOCH[947/1000] loss0.011-|Sample:9.18|
EPOCH[948/1000] loss0.011-|Sample:9.32|
EPOCH[949/1000] loss0.011-|Sample:9.08|
EPOCH[950/1000] loss0.011-|Sample:9.27|
[TEST]
{'precision': array([0.05596825]), 'recall': array([0.18251198]), 'ndcg': array([0.15458408])}
EPOCH[951/1000] loss0.011-|Sample:9.04|
EPOCH[952/1000] loss0.011-|Sample:9.41|
EPOCH[953/1000] loss0.011-|Sample:9.00|
EPOCH[954/1000] loss0.011-|Sample:9.43|
EPOCH[955/1000] loss0.011-|Sample:8.18|
EPOCH[956/1000] loss0.011-|Sample:9.09|
EPOCH[957/1000] loss0.011-|Sample:9.43|
EPOCH[958/1000] loss0.011-|Sample:9.09|
EPOCH[959/1000] loss0.011-|Sample:9.31|
EPOCH[960/1000] loss0.011-|Sample:9.45|
[TEST]
{'precision': array([0.05591299]), 'recall': array([0.18230703]), 'ndcg': array([0.15446309])}
EPOCH[961/1000] loss0.011-|Sample:9.19|
EPOCH[962/1000] loss0.011-|Sample:8.90|
EPOCH[963/1000] loss0.011-|Sample:9.21|
EPOCH[964/1000] loss0.011-|Sample:8.61|
EPOCH[965/1000] loss0.011-|Sample:9.09|
EPOCH[966/1000] loss0.011-|Sample:8.91|
EPOCH[967/1000] loss0.011-|Sample:9.09|
EPOCH[968/1000] loss0.011-|Sample:9.37|
EPOCH[969/1000] loss0.011-|Sample:9.32|
EPOCH[970/1000] loss0.011-|Sample:9.42|
[TEST]
{'precision': array([0.05582926]), 'recall': array([0.18190511]), 'ndcg': array([0.15428484])}
EPOCH[971/1000] loss0.011-|Sample:8.98|
EPOCH[972/1000] loss0.011-|Sample:9.40|
EPOCH[973/1000] loss0.011-|Sample:9.44|
EPOCH[974/1000] loss0.011-|Sample:9.16|
EPOCH[975/1000] loss0.011-|Sample:9.17|
EPOCH[976/1000] loss0.011-|Sample:9.22|
EPOCH[977/1000] loss0.011-|Sample:9.19|
EPOCH[978/1000] loss0.011-|Sample:9.34|
EPOCH[979/1000] loss0.011-|Sample:7.12|
EPOCH[980/1000] loss0.011-|Sample:9.39|
[TEST]
{'precision': array([0.0557606]), 'recall': array([0.18142298]), 'ndcg': array([0.15410673])}
EPOCH[981/1000] loss0.011-|Sample:9.07|
EPOCH[982/1000] loss0.011-|Sample:9.19|
EPOCH[983/1000] loss0.011-|Sample:9.22|
EPOCH[984/1000] loss0.011-|Sample:9.50|
EPOCH[985/1000] loss0.011-|Sample:9.10|
EPOCH[986/1000] loss0.011-|Sample:9.18|
EPOCH[987/1000] loss0.011-|Sample:9.18|
EPOCH[988/1000] loss0.011-|Sample:7.69|
EPOCH[989/1000] loss0.011-|Sample:9.43|
EPOCH[990/1000] loss0.011-|Sample:8.94|
[TEST]
{'precision': array([0.05583596]), 'recall': array([0.18214132]), 'ndcg': array([0.15447618])}
EPOCH[991/1000] loss0.011-|Sample:9.27|
EPOCH[992/1000] loss0.011-|Sample:9.06|
EPOCH[993/1000] loss0.011-|Sample:9.29|
EPOCH[994/1000] loss0.011-|Sample:9.21|
EPOCH[995/1000] loss0.011-|Sample:9.41|
EPOCH[996/1000] loss0.011-|Sample:9.43|
EPOCH[997/1000] loss0.011-|Sample:9.42|
EPOCH[998/1000] loss0.011-|Sample:9.07|
EPOCH[999/1000] loss0.011-|Sample:9.21|
EPOCH[1000/1000] loss0.011-|Sample:9.20|

Process finished with exit code 0


New computer：5月30日 21：44：41--5月31日 13：40：55  耗时：15：36：14 
D:\ProgramFiles\Anaconda3\envs\image_caption_python36\python.exe D:/workspace/LightGcn/LightGCN-PyTorch-master/code/main.py
Cpp extension not loaded
>>SEED: 2020
loading [../data/gowalla]
810128 interactions for training
217242 interactions for testing
gowalla Sparsity : 0.0008396216228570436
gowalla is ready to go
===========config================
{'A_n_fold': 100,
 'A_split': False,
 'bigdata': False,
 'bpr_batch_size': 2048,
 'decay': 0.0001,
 'dropout': 0,
 'keep_prob': 0.6,
 'latent_dim_rec': 64,
 'lightGCN_n_layers': 3,
 'lr': 0.001,
 'multicore': 0,
 'pretrain': 0,
 'test_u_batch_size': 100}
cores for test: 6
comment: lgn
tensorboard: 1
LOAD: 0
Weight path: ./checkpoints
Test Topks: [20]
using bpr loss
===========end===================
use NORMAL distribution initilizer
loading adjacency matrix
successfully loaded...
don't split the matrix
lgn is already to go(dropout:0)
load and save to /home/qhc/下载/LightGCN-PyTorch-master\code\checkpoints\lgn-gowalla-3-64.pth.tar
[TEST]
{'precision': array([0.00018755]), 'recall': array([0.00053749]), 'ndcg': array([0.00040829])}
EPOCH[1/1000] loss0.545-|Sample:4.45|
EPOCH[2/1000] loss0.240-|Sample:5.20|
EPOCH[3/1000] loss0.163-|Sample:4.98|
EPOCH[4/1000] loss0.131-|Sample:5.09|
EPOCH[5/1000] loss0.112-|Sample:4.95|
EPOCH[6/1000] loss0.099-|Sample:4.58|
EPOCH[7/1000] loss0.090-|Sample:5.53|
EPOCH[8/1000] loss0.084-|Sample:4.84|
EPOCH[9/1000] loss0.078-|Sample:5.08|
EPOCH[10/1000] loss0.074-|Sample:5.31|
[TEST]
{'precision': array([0.03667024]), 'recall': array([0.12013993]), 'ndcg': array([0.10055136])}
EPOCH[11/1000] loss0.071-|Sample:4.64|
EPOCH[12/1000] loss0.068-|Sample:4.80|
EPOCH[13/1000] loss0.065-|Sample:4.87|
EPOCH[14/1000] loss0.064-|Sample:4.89|
EPOCH[15/1000] loss0.061-|Sample:4.87|
EPOCH[16/1000] loss0.059-|Sample:4.72|
EPOCH[17/1000] loss0.057-|Sample:4.86|
EPOCH[18/1000] loss0.055-|Sample:4.75|
EPOCH[19/1000] loss0.054-|Sample:5.87|
EPOCH[20/1000] loss0.052-|Sample:4.86|
[TEST]
{'precision': array([0.03967446]), 'recall': array([0.13133384]), 'ndcg': array([0.1088302])}
EPOCH[21/1000] loss0.052-|Sample:4.91|
EPOCH[22/1000] loss0.050-|Sample:4.86|
EPOCH[23/1000] loss0.049-|Sample:5.00|
EPOCH[24/1000] loss0.048-|Sample:4.64|
EPOCH[25/1000] loss0.047-|Sample:5.00|
EPOCH[26/1000] loss0.046-|Sample:4.84|
EPOCH[27/1000] loss0.045-|Sample:5.19|
EPOCH[28/1000] loss0.044-|Sample:4.59|
EPOCH[29/1000] loss0.043-|Sample:5.23|
EPOCH[30/1000] loss0.042-|Sample:4.92|
[TEST]
{'precision': array([0.0419787]), 'recall': array([0.13920676]), 'ndcg': array([0.11538014])}
EPOCH[31/1000] loss0.042-|Sample:4.89|
EPOCH[32/1000] loss0.041-|Sample:4.95|
EPOCH[33/1000] loss0.040-|Sample:4.98|
EPOCH[34/1000] loss0.039-|Sample:4.61|
EPOCH[35/1000] loss0.039-|Sample:5.16|
EPOCH[36/1000] loss0.038-|Sample:4.97|
EPOCH[37/1000] loss0.037-|Sample:5.16|
EPOCH[38/1000] loss0.037-|Sample:4.89|
EPOCH[39/1000] loss0.036-|Sample:4.64|
EPOCH[40/1000] loss0.036-|Sample:5.19|
[TEST]
{'precision': array([0.04348751]), 'recall': array([0.14436693]), 'ndcg': array([0.12010255])}
EPOCH[41/1000] loss0.035-|Sample:4.92|
EPOCH[42/1000] loss0.035-|Sample:4.64|
EPOCH[43/1000] loss0.034-|Sample:5.36|
EPOCH[44/1000] loss0.034-|Sample:4.70|
EPOCH[45/1000] loss0.033-|Sample:5.03|
EPOCH[46/1000] loss0.033-|Sample:4.86|
EPOCH[47/1000] loss0.032-|Sample:4.94|
EPOCH[48/1000] loss0.032-|Sample:5.00|
EPOCH[49/1000] loss0.032-|Sample:4.87|
EPOCH[50/1000] loss0.031-|Sample:4.92|
[TEST]
{'precision': array([0.0447535]), 'recall': array([0.14868784]), 'ndcg': array([0.12388066])}
EPOCH[51/1000] loss0.031-|Sample:5.14|
EPOCH[52/1000] loss0.030-|Sample:4.67|
EPOCH[53/1000] loss0.030-|Sample:5.11|
EPOCH[54/1000] loss0.030-|Sample:4.81|
EPOCH[55/1000] loss0.030-|Sample:4.92|
EPOCH[56/1000] loss0.029-|Sample:5.00|
EPOCH[57/1000] loss0.030-|Sample:4.64|
EPOCH[58/1000] loss0.028-|Sample:4.95|
EPOCH[59/1000] loss0.029-|Sample:4.87|
EPOCH[60/1000] loss0.028-|Sample:4.91|
[TEST]
{'precision': array([0.04583696]), 'recall': array([0.15272791]), 'ndcg': array([0.12775741])}
EPOCH[61/1000] loss0.028-|Sample:5.03|
EPOCH[62/1000] loss0.028-|Sample:4.69|
EPOCH[63/1000] loss0.027-|Sample:5.09|
EPOCH[64/1000] loss0.027-|Sample:4.86|
EPOCH[65/1000] loss0.027-|Sample:4.87|
EPOCH[66/1000] loss0.027-|Sample:4.89|
EPOCH[67/1000] loss0.026-|Sample:4.70|
EPOCH[68/1000] loss0.026-|Sample:5.06|
EPOCH[69/1000] loss0.026-|Sample:5.08|
EPOCH[70/1000] loss0.026-|Sample:5.16|
[TEST]
{'precision': array([0.04666421]), 'recall': array([0.15538629]), 'ndcg': array([0.13008558])}
EPOCH[71/1000] loss0.026-|Sample:5.33|
EPOCH[72/1000] loss0.025-|Sample:4.89|
EPOCH[73/1000] loss0.025-|Sample:4.84|
EPOCH[74/1000] loss0.025-|Sample:4.91|
EPOCH[75/1000] loss0.024-|Sample:4.78|
EPOCH[76/1000] loss0.024-|Sample:4.92|
EPOCH[77/1000] loss0.024-|Sample:4.70|
EPOCH[78/1000] loss0.023-|Sample:5.01|
EPOCH[79/1000] loss0.023-|Sample:4.89|
EPOCH[80/1000] loss0.023-|Sample:4.98|
[TEST]
{'precision': array([0.04764385]), 'recall': array([0.1588197]), 'ndcg': array([0.13290281])}
EPOCH[81/1000] loss0.023-|Sample:4.89|
EPOCH[82/1000] loss0.023-|Sample:4.83|
EPOCH[83/1000] loss0.023-|Sample:5.09|
EPOCH[84/1000] loss0.023-|Sample:4.91|
EPOCH[85/1000] loss0.023-|Sample:4.58|
EPOCH[86/1000] loss0.022-|Sample:5.16|
EPOCH[87/1000] loss0.022-|Sample:4.92|
EPOCH[88/1000] loss0.022-|Sample:4.95|
EPOCH[89/1000] loss0.022-|Sample:4.97|
EPOCH[90/1000] loss0.022-|Sample:4.73|
[TEST]
{'precision': array([0.04831536]), 'recall': array([0.16129856]), 'ndcg': array([0.13483202])}
EPOCH[91/1000] loss0.022-|Sample:4.73|
EPOCH[92/1000] loss0.021-|Sample:5.09|
EPOCH[93/1000] loss0.021-|Sample:4.89|
EPOCH[94/1000] loss0.021-|Sample:4.92|
EPOCH[95/1000] loss0.021-|Sample:4.72|
EPOCH[96/1000] loss0.021-|Sample:4.97|
EPOCH[97/1000] loss0.021-|Sample:4.80|
EPOCH[98/1000] loss0.021-|Sample:5.00|
EPOCH[99/1000] loss0.021-|Sample:4.97|
EPOCH[100/1000] loss0.021-|Sample:4.73|
[TEST]
{'precision': array([0.04905051]), 'recall': array([0.16340229]), 'ndcg': array([0.13692411])}
EPOCH[101/1000] loss0.020-|Sample:5.12|
EPOCH[102/1000] loss0.020-|Sample:4.98|
EPOCH[103/1000] loss0.020-|Sample:4.70|
EPOCH[104/1000] loss0.020-|Sample:4.95|
EPOCH[105/1000] loss0.020-|Sample:4.98|
EPOCH[106/1000] loss0.020-|Sample:5.05|
EPOCH[107/1000] loss0.020-|Sample:5.25|
EPOCH[108/1000] loss0.019-|Sample:4.51|
EPOCH[109/1000] loss0.019-|Sample:4.97|
EPOCH[110/1000] loss0.019-|Sample:4.73|
[TEST]
{'precision': array([0.04962657]), 'recall': array([0.16554733]), 'ndcg': array([0.1386929])}
EPOCH[111/1000] loss0.019-|Sample:5.20|
EPOCH[112/1000] loss0.019-|Sample:5.05|
EPOCH[113/1000] loss0.019-|Sample:4.70|
EPOCH[114/1000] loss0.019-|Sample:5.09|
EPOCH[115/1000] loss0.019-|Sample:4.87|
EPOCH[116/1000] loss0.019-|Sample:5.05|
EPOCH[117/1000] loss0.019-|Sample:5.40|
EPOCH[118/1000] loss0.018-|Sample:4.55|
EPOCH[119/1000] loss0.018-|Sample:5.17|
EPOCH[120/1000] loss0.018-|Sample:4.89|
[TEST]
{'precision': array([0.05002177]), 'recall': array([0.16646391]), 'ndcg': array([0.13997692])}
EPOCH[121/1000] loss0.018-|Sample:4.84|
EPOCH[122/1000] loss0.018-|Sample:4.92|
EPOCH[123/1000] loss0.018-|Sample:5.20|
EPOCH[124/1000] loss0.018-|Sample:4.81|
EPOCH[125/1000] loss0.018-|Sample:5.09|
EPOCH[126/1000] loss0.018-|Sample:4.80|
EPOCH[127/1000] loss0.018-|Sample:4.94|
EPOCH[128/1000] loss0.018-|Sample:4.56|
EPOCH[129/1000] loss0.018-|Sample:5.08|
EPOCH[130/1000] loss0.018-|Sample:4.89|
[TEST]
{'precision': array([0.05054424]), 'recall': array([0.16797894]), 'ndcg': array([0.14133984])}
EPOCH[131/1000] loss0.017-|Sample:4.64|
EPOCH[132/1000] loss0.017-|Sample:4.94|
EPOCH[133/1000] loss0.017-|Sample:5.01|
EPOCH[134/1000] loss0.017-|Sample:4.80|
EPOCH[135/1000] loss0.017-|Sample:5.11|
EPOCH[136/1000] loss0.017-|Sample:4.64|
EPOCH[137/1000] loss0.017-|Sample:4.95|
EPOCH[138/1000] loss0.017-|Sample:4.91|
EPOCH[139/1000] loss0.017-|Sample:4.81|
EPOCH[140/1000] loss0.017-|Sample:4.98|
[TEST]
{'precision': array([0.05099973]), 'recall': array([0.16943591]), 'ndcg': array([0.14256597])}
EPOCH[141/1000] loss0.017-|Sample:5.12|
EPOCH[142/1000] loss0.017-|Sample:4.80|
EPOCH[143/1000] loss0.017-|Sample:4.83|
EPOCH[144/1000] loss0.017-|Sample:4.89|
EPOCH[145/1000] loss0.017-|Sample:5.30|
EPOCH[146/1000] loss0.016-|Sample:4.66|
EPOCH[147/1000] loss0.016-|Sample:4.97|
EPOCH[148/1000] loss0.016-|Sample:4.87|
EPOCH[149/1000] loss0.016-|Sample:5.03|
EPOCH[150/1000] loss0.016-|Sample:4.95|
[TEST]
{'precision': array([0.05127437]), 'recall': array([0.17041577]), 'ndcg': array([0.14360165])}
EPOCH[151/1000] loss0.016-|Sample:5.48|
EPOCH[152/1000] loss0.016-|Sample:4.72|
EPOCH[153/1000] loss0.016-|Sample:5.16|
EPOCH[154/1000] loss0.016-|Sample:4.78|
EPOCH[155/1000] loss0.016-|Sample:5.01|
EPOCH[156/1000] loss0.016-|Sample:5.26|
EPOCH[157/1000] loss0.016-|Sample:4.73|
EPOCH[158/1000] loss0.016-|Sample:5.11|
EPOCH[159/1000] loss0.016-|Sample:4.94|
EPOCH[160/1000] loss0.016-|Sample:5.14|
[TEST]
{'precision': array([0.05158751]), 'recall': array([0.171479]), 'ndcg': array([0.14461107])}
EPOCH[161/1000] loss0.016-|Sample:5.00|
EPOCH[162/1000] loss0.015-|Sample:4.76|
EPOCH[163/1000] loss0.016-|Sample:5.08|
EPOCH[164/1000] loss0.015-|Sample:4.83|
EPOCH[165/1000] loss0.015-|Sample:5.09|
EPOCH[166/1000] loss0.015-|Sample:5.05|
EPOCH[167/1000] loss0.015-|Sample:4.76|
EPOCH[168/1000] loss0.015-|Sample:4.98|
EPOCH[169/1000] loss0.015-|Sample:4.67|
EPOCH[170/1000] loss0.015-|Sample:4.94|
[TEST]
{'precision': array([0.05178177]), 'recall': array([0.17198944]), 'ndcg': array([0.14515588])}
EPOCH[171/1000] loss0.015-|Sample:4.91|
EPOCH[172/1000] loss0.015-|Sample:4.86|
EPOCH[173/1000] loss0.015-|Sample:5.08|
EPOCH[174/1000] loss0.015-|Sample:4.89|
EPOCH[175/1000] loss0.015-|Sample:4.95|
EPOCH[176/1000] loss0.015-|Sample:5.20|
EPOCH[177/1000] loss0.015-|Sample:4.92|
EPOCH[178/1000] loss0.015-|Sample:5.09|
EPOCH[179/1000] loss0.015-|Sample:4.73|
EPOCH[180/1000] loss0.015-|Sample:4.95|
[TEST]
{'precision': array([0.05200281]), 'recall': array([0.17246602]), 'ndcg': array([0.14575405])}
EPOCH[181/1000] loss0.015-|Sample:4.98|
EPOCH[182/1000] loss0.015-|Sample:4.69|
EPOCH[183/1000] loss0.015-|Sample:5.01|
EPOCH[184/1000] loss0.015-|Sample:4.94|
EPOCH[185/1000] loss0.015-|Sample:4.83|
EPOCH[186/1000] loss0.015-|Sample:4.94|
EPOCH[187/1000] loss0.014-|Sample:4.70|
EPOCH[188/1000] loss0.015-|Sample:5.08|
EPOCH[189/1000] loss0.015-|Sample:5.00|
EPOCH[190/1000] loss0.015-|Sample:4.91|
[TEST]
{'precision': array([0.05231094]), 'recall': array([0.17317598]), 'ndcg': array([0.14669463])}
EPOCH[191/1000] loss0.015-|Sample:5.11|
EPOCH[192/1000] loss0.014-|Sample:4.67|
EPOCH[193/1000] loss0.015-|Sample:5.01|
EPOCH[194/1000] loss0.014-|Sample:4.89|
EPOCH[195/1000] loss0.014-|Sample:4.81|
EPOCH[196/1000] loss0.014-|Sample:4.91|
EPOCH[197/1000] loss0.014-|Sample:4.61|
EPOCH[198/1000] loss0.014-|Sample:5.16|
EPOCH[199/1000] loss0.014-|Sample:4.94|
EPOCH[200/1000] loss0.014-|Sample:4.92|
[TEST]
{'precision': array([0.05259227]), 'recall': array([0.17426658]), 'ndcg': array([0.14731703])}
EPOCH[201/1000] loss0.014-|Sample:4.94|
EPOCH[202/1000] loss0.014-|Sample:5.20|
EPOCH[203/1000] loss0.014-|Sample:4.87|
EPOCH[204/1000] loss0.014-|Sample:5.53|
EPOCH[205/1000] loss0.014-|Sample:4.59|
EPOCH[206/1000] loss0.014-|Sample:5.01|
EPOCH[207/1000] loss0.014-|Sample:4.89|
EPOCH[208/1000] loss0.014-|Sample:4.81|
EPOCH[209/1000] loss0.014-|Sample:4.84|
EPOCH[210/1000] loss0.014-|Sample:5.28|
[TEST]
{'precision': array([0.05275638]), 'recall': array([0.17485041]), 'ndcg': array([0.1476322])}
EPOCH[211/1000] loss0.014-|Sample:4.86|
EPOCH[212/1000] loss0.014-|Sample:4.86|
EPOCH[213/1000] loss0.014-|Sample:4.97|
EPOCH[214/1000] loss0.014-|Sample:5.14|
EPOCH[215/1000] loss0.014-|Sample:4.76|
EPOCH[216/1000] loss0.014-|Sample:4.94|
EPOCH[217/1000] loss0.014-|Sample:4.87|
EPOCH[218/1000] loss0.014-|Sample:4.98|
EPOCH[219/1000] loss0.014-|Sample:5.22|
EPOCH[220/1000] loss0.014-|Sample:4.80|
[TEST]
{'precision': array([0.05284346]), 'recall': array([0.17482844]), 'ndcg': array([0.14816195])}
EPOCH[221/1000] loss0.014-|Sample:4.73|
EPOCH[222/1000] loss0.013-|Sample:5.00|
EPOCH[223/1000] loss0.013-|Sample:4.73|
EPOCH[224/1000] loss0.014-|Sample:5.03|
EPOCH[225/1000] loss0.014-|Sample:4.73|
EPOCH[226/1000] loss0.014-|Sample:4.86|
EPOCH[227/1000] loss0.014-|Sample:4.78|
EPOCH[228/1000] loss0.013-|Sample:4.91|
EPOCH[229/1000] loss0.013-|Sample:4.94|
EPOCH[230/1000] loss0.013-|Sample:4.80|
[TEST]
{'precision': array([0.05311977]), 'recall': array([0.17569017]), 'ndcg': array([0.14864752])}
EPOCH[231/1000] loss0.013-|Sample:4.87|
EPOCH[232/1000] loss0.014-|Sample:5.05|
EPOCH[233/1000] loss0.013-|Sample:4.70|
EPOCH[234/1000] loss0.013-|Sample:4.98|
EPOCH[235/1000] loss0.013-|Sample:4.95|
EPOCH[236/1000] loss0.013-|Sample:5.20|
EPOCH[237/1000] loss0.013-|Sample:4.92|
EPOCH[238/1000] loss0.013-|Sample:4.62|
EPOCH[239/1000] loss0.013-|Sample:4.97|
EPOCH[240/1000] loss0.013-|Sample:4.86|
[TEST]
{'precision': array([0.05304274]), 'recall': array([0.17541505]), 'ndcg': array([0.14845798])}
EPOCH[241/1000] loss0.013-|Sample:4.98|
EPOCH[242/1000] loss0.013-|Sample:4.98|
EPOCH[243/1000] loss0.013-|Sample:4.72|
EPOCH[244/1000] loss0.013-|Sample:5.19|
EPOCH[245/1000] loss0.013-|Sample:4.87|
EPOCH[246/1000] loss0.013-|Sample:4.98|
EPOCH[247/1000] loss0.013-|Sample:5.01|
EPOCH[248/1000] loss0.013-|Sample:4.64|
EPOCH[249/1000] loss0.013-|Sample:5.09|
EPOCH[250/1000] loss0.013-|Sample:4.81|
[TEST]
{'precision': array([0.0531901]), 'recall': array([0.17546997]), 'ndcg': array([0.14866824])}
EPOCH[251/1000] loss0.013-|Sample:4.69|
EPOCH[252/1000] loss0.013-|Sample:4.86|
EPOCH[253/1000] loss0.013-|Sample:4.98|
EPOCH[254/1000] loss0.013-|Sample:4.87|
EPOCH[255/1000] loss0.013-|Sample:4.94|
EPOCH[256/1000] loss0.013-|Sample:4.72|
EPOCH[257/1000] loss0.013-|Sample:4.97|
EPOCH[258/1000] loss0.013-|Sample:4.67|
EPOCH[259/1000] loss0.013-|Sample:5.25|
EPOCH[260/1000] loss0.013-|Sample:4.80|
[TEST]
{'precision': array([0.05343124]), 'recall': array([0.17623571]), 'ndcg': array([0.14929098])}
EPOCH[261/1000] loss0.013-|Sample:4.69|
EPOCH[262/1000] loss0.013-|Sample:5.09|
EPOCH[263/1000] loss0.013-|Sample:4.92|
EPOCH[264/1000] loss0.013-|Sample:4.76|
EPOCH[265/1000] loss0.013-|Sample:5.05|
EPOCH[266/1000] loss0.013-|Sample:4.56|
EPOCH[267/1000] loss0.013-|Sample:4.98|
EPOCH[268/1000] loss0.013-|Sample:4.84|
EPOCH[269/1000] loss0.013-|Sample:5.36|
EPOCH[270/1000] loss0.013-|Sample:4.98|
[TEST]
{'precision': array([0.05365396]), 'recall': array([0.17684363]), 'ndcg': array([0.1497339])}
EPOCH[271/1000] loss0.013-|Sample:4.94|
EPOCH[272/1000] loss0.013-|Sample:4.72|
EPOCH[273/1000] loss0.013-|Sample:5.01|
EPOCH[274/1000] loss0.013-|Sample:4.94|
EPOCH[275/1000] loss0.013-|Sample:5.05|
EPOCH[276/1000] loss0.013-|Sample:4.62|
EPOCH[277/1000] loss0.013-|Sample:4.98|
EPOCH[278/1000] loss0.013-|Sample:4.83|
EPOCH[279/1000] loss0.013-|Sample:5.03|
EPOCH[280/1000] loss0.012-|Sample:4.98|
[TEST]
{'precision': array([0.05375444]), 'recall': array([0.17719345]), 'ndcg': array([0.15002106])}
EPOCH[281/1000] loss0.013-|Sample:5.05|
EPOCH[282/1000] loss0.013-|Sample:4.75|
EPOCH[283/1000] loss0.012-|Sample:4.94|
EPOCH[284/1000] loss0.013-|Sample:4.72|
EPOCH[285/1000] loss0.013-|Sample:4.86|
EPOCH[286/1000] loss0.013-|Sample:5.03|
EPOCH[287/1000] loss0.013-|Sample:5.26|
EPOCH[288/1000] loss0.012-|Sample:5.33|
EPOCH[289/1000] loss0.013-|Sample:4.76|
EPOCH[290/1000] loss0.013-|Sample:4.98|
[TEST]
{'precision': array([0.05364224]), 'recall': array([0.17671648]), 'ndcg': array([0.15005272])}
EPOCH[291/1000] loss0.012-|Sample:4.80|
EPOCH[292/1000] loss0.012-|Sample:4.98|
EPOCH[293/1000] loss0.013-|Sample:4.98|
EPOCH[294/1000] loss0.012-|Sample:4.66|
EPOCH[295/1000] loss0.013-|Sample:5.01|
EPOCH[296/1000] loss0.012-|Sample:4.92|
EPOCH[297/1000] loss0.012-|Sample:4.98|
EPOCH[298/1000] loss0.012-|Sample:4.92|
EPOCH[299/1000] loss0.012-|Sample:4.62|
EPOCH[300/1000] loss0.012-|Sample:4.97|
[TEST]
{'precision': array([0.05383314]), 'recall': array([0.17756546]), 'ndcg': array([0.15052913])}
EPOCH[301/1000] loss0.013-|Sample:4.89|
EPOCH[302/1000] loss0.012-|Sample:4.83|
EPOCH[303/1000] loss0.012-|Sample:4.89|
EPOCH[304/1000] loss0.012-|Sample:5.03|
EPOCH[305/1000] loss0.012-|Sample:4.86|
EPOCH[306/1000] loss0.013-|Sample:4.97|
EPOCH[307/1000] loss0.012-|Sample:5.01|
EPOCH[308/1000] loss0.012-|Sample:4.95|
EPOCH[309/1000] loss0.013-|Sample:4.81|
EPOCH[310/1000] loss0.012-|Sample:4.95|
[TEST]
{'precision': array([0.05386496]), 'recall': array([0.17759083]), 'ndcg': array([0.15065647])}
EPOCH[311/1000] loss0.012-|Sample:5.00|
EPOCH[312/1000] loss0.012-|Sample:4.64|
EPOCH[313/1000] loss0.012-|Sample:4.98|
EPOCH[314/1000] loss0.012-|Sample:4.87|
EPOCH[315/1000] loss0.012-|Sample:4.98|
EPOCH[316/1000] loss0.012-|Sample:4.94|
EPOCH[317/1000] loss0.012-|Sample:4.67|
EPOCH[318/1000] loss0.012-|Sample:5.06|
EPOCH[319/1000] loss0.012-|Sample:4.84|
EPOCH[320/1000] loss0.012-|Sample:4.91|
[TEST]
{'precision': array([0.05381807]), 'recall': array([0.17710631]), 'ndcg': array([0.15057742])}
EPOCH[321/1000] loss0.012-|Sample:4.94|
EPOCH[322/1000] loss0.012-|Sample:4.83|
EPOCH[323/1000] loss0.012-|Sample:5.14|
EPOCH[324/1000] loss0.012-|Sample:4.70|
EPOCH[325/1000] loss0.012-|Sample:5.23|
EPOCH[326/1000] loss0.012-|Sample:5.00|
EPOCH[327/1000] loss0.012-|Sample:4.86|
EPOCH[328/1000] loss0.012-|Sample:5.05|
EPOCH[329/1000] loss0.012-|Sample:4.80|
EPOCH[330/1000] loss0.012-|Sample:4.98|
[TEST]
{'precision': array([0.05406424]), 'recall': array([0.17787993]), 'ndcg': array([0.15091359])}
EPOCH[331/1000] loss0.012-|Sample:5.31|
EPOCH[332/1000] loss0.012-|Sample:4.84|
EPOCH[333/1000] loss0.012-|Sample:4.95|
EPOCH[334/1000] loss0.012-|Sample:4.92|
EPOCH[335/1000] loss0.012-|Sample:4.59|
EPOCH[336/1000] loss0.012-|Sample:5.00|
EPOCH[337/1000] loss0.012-|Sample:4.91|
EPOCH[338/1000] loss0.012-|Sample:4.97|
EPOCH[339/1000] loss0.012-|Sample:4.92|
EPOCH[340/1000] loss0.012-|Sample:4.89|
[TEST]
{'precision': array([0.05411615]), 'recall': array([0.17789416]), 'ndcg': array([0.15123909])}
EPOCH[341/1000] loss0.012-|Sample:5.00|
EPOCH[342/1000] loss0.012-|Sample:4.80|
EPOCH[343/1000] loss0.012-|Sample:4.98|
EPOCH[344/1000] loss0.012-|Sample:4.94|
EPOCH[345/1000] loss0.012-|Sample:4.84|
EPOCH[346/1000] loss0.012-|Sample:4.89|
EPOCH[347/1000] loss0.012-|Sample:4.75|
EPOCH[348/1000] loss0.012-|Sample:4.94|
EPOCH[349/1000] loss0.012-|Sample:5.69|
EPOCH[350/1000] loss0.012-|Sample:4.75|
[TEST]
{'precision': array([0.05428528]), 'recall': array([0.17855851]), 'ndcg': array([0.15173125])}
EPOCH[351/1000] loss0.012-|Sample:4.89|
EPOCH[352/1000] loss0.012-|Sample:4.97|
EPOCH[353/1000] loss0.012-|Sample:4.64|
EPOCH[354/1000] loss0.012-|Sample:4.92|
EPOCH[355/1000] loss0.012-|Sample:4.84|
EPOCH[356/1000] loss0.012-|Sample:5.33|
EPOCH[357/1000] loss0.012-|Sample:4.70|
EPOCH[358/1000] loss0.012-|Sample:4.97|
EPOCH[359/1000] loss0.012-|Sample:4.89|
EPOCH[360/1000] loss0.012-|Sample:4.83|
[TEST]
{'precision': array([0.0542183]), 'recall': array([0.17801099]), 'ndcg': array([0.15129649])}
EPOCH[361/1000] loss0.012-|Sample:5.06|
EPOCH[362/1000] loss0.012-|Sample:4.98|
EPOCH[363/1000] loss0.012-|Sample:4.81|
EPOCH[364/1000] loss0.012-|Sample:4.98|
EPOCH[365/1000] loss0.012-|Sample:4.76|
EPOCH[366/1000] loss0.012-|Sample:4.94|
EPOCH[367/1000] loss0.012-|Sample:4.95|
EPOCH[368/1000] loss0.012-|Sample:4.81|
EPOCH[369/1000] loss0.012-|Sample:5.22|
EPOCH[370/1000] loss0.012-|Sample:4.73|
[TEST]
{'precision': array([0.05432715]), 'recall': array([0.17834869]), 'ndcg': array([0.15159262])}
EPOCH[371/1000] loss0.012-|Sample:4.56|
EPOCH[372/1000] loss0.012-|Sample:4.98|
EPOCH[373/1000] loss0.012-|Sample:4.67|
EPOCH[374/1000] loss0.012-|Sample:4.89|
EPOCH[375/1000] loss0.012-|Sample:4.64|
EPOCH[376/1000] loss0.012-|Sample:4.94|
EPOCH[377/1000] loss0.012-|Sample:5.03|
EPOCH[378/1000] loss0.012-|Sample:4.86|
EPOCH[379/1000] loss0.012-|Sample:5.06|
EPOCH[380/1000] loss0.012-|Sample:4.66|
[TEST]
{'precision': array([0.05449293]), 'recall': array([0.17921847]), 'ndcg': array([0.15189918])}
EPOCH[381/1000] loss0.012-|Sample:4.64|
EPOCH[382/1000] loss0.012-|Sample:5.05|
EPOCH[383/1000] loss0.012-|Sample:4.97|
EPOCH[384/1000] loss0.012-|Sample:4.97|
EPOCH[385/1000] loss0.012-|Sample:4.98|
EPOCH[386/1000] loss0.012-|Sample:4.58|
EPOCH[387/1000] loss0.012-|Sample:5.06|
EPOCH[388/1000] loss0.012-|Sample:4.84|
EPOCH[389/1000] loss0.012-|Sample:4.98|
EPOCH[390/1000] loss0.012-|Sample:4.67|
[TEST]
{'precision': array([0.0545214]), 'recall': array([0.17888297]), 'ndcg': array([0.15177062])}
EPOCH[391/1000] loss0.012-|Sample:4.69|
EPOCH[392/1000] loss0.012-|Sample:4.97|
EPOCH[393/1000] loss0.012-|Sample:4.89|
EPOCH[394/1000] loss0.012-|Sample:4.94|
EPOCH[395/1000] loss0.012-|Sample:5.05|
EPOCH[396/1000] loss0.012-|Sample:4.67|
EPOCH[397/1000] loss0.012-|Sample:5.03|
EPOCH[398/1000] loss0.012-|Sample:4.94|
EPOCH[399/1000] loss0.012-|Sample:5.06|
EPOCH[400/1000] loss0.012-|Sample:4.92|
[TEST]
{'precision': array([0.05457834]), 'recall': array([0.17922929]), 'ndcg': array([0.15197048])}
EPOCH[401/1000] loss0.012-|Sample:4.86|
EPOCH[402/1000] loss0.012-|Sample:4.86|
EPOCH[403/1000] loss0.012-|Sample:4.98|
EPOCH[404/1000] loss0.012-|Sample:4.70|
EPOCH[405/1000] loss0.012-|Sample:5.22|
EPOCH[406/1000] loss0.012-|Sample:4.75|
EPOCH[407/1000] loss0.012-|Sample:5.17|
EPOCH[408/1000] loss0.012-|Sample:4.81|
EPOCH[409/1000] loss0.012-|Sample:4.89|
EPOCH[410/1000] loss0.012-|Sample:5.01|
[TEST]
{'precision': array([0.05450466]), 'recall': array([0.17883663]), 'ndcg': array([0.15176541])}
EPOCH[411/1000] loss0.012-|Sample:4.89|
EPOCH[412/1000] loss0.012-|Sample:4.81|
EPOCH[413/1000] loss0.012-|Sample:5.03|
EPOCH[414/1000] loss0.012-|Sample:4.66|
EPOCH[415/1000] loss0.012-|Sample:5.05|
EPOCH[416/1000] loss0.011-|Sample:4.83|
EPOCH[417/1000] loss0.012-|Sample:5.00|
EPOCH[418/1000] loss0.012-|Sample:4.94|
EPOCH[419/1000] loss0.012-|Sample:4.66|
EPOCH[420/1000] loss0.012-|Sample:5.08|
[TEST]
{'precision': array([0.05466877]), 'recall': array([0.17917757]), 'ndcg': array([0.15233577])}
EPOCH[421/1000] loss0.012-|Sample:4.94|
EPOCH[422/1000] loss0.011-|Sample:4.80|
EPOCH[423/1000] loss0.012-|Sample:5.51|
EPOCH[424/1000] loss0.011-|Sample:4.56|
EPOCH[425/1000] loss0.012-|Sample:5.23|
EPOCH[426/1000] loss0.012-|Sample:4.92|
EPOCH[427/1000] loss0.012-|Sample:4.95|
EPOCH[428/1000] loss0.012-|Sample:5.05|
EPOCH[429/1000] loss0.011-|Sample:4.81|
EPOCH[430/1000] loss0.012-|Sample:5.05|
[TEST]
{'precision': array([0.05479603]), 'recall': array([0.17962426]), 'ndcg': array([0.15248337])}
EPOCH[431/1000] loss0.012-|Sample:5.01|
EPOCH[432/1000] loss0.012-|Sample:4.67|
EPOCH[433/1000] loss0.011-|Sample:4.97|
EPOCH[434/1000] loss0.011-|Sample:5.05|
EPOCH[435/1000] loss0.011-|Sample:4.87|
EPOCH[436/1000] loss0.012-|Sample:4.97|
EPOCH[437/1000] loss0.011-|Sample:4.69|
EPOCH[438/1000] loss0.012-|Sample:5.03|
EPOCH[439/1000] loss0.012-|Sample:4.78|
EPOCH[440/1000] loss0.012-|Sample:4.95|
[TEST]
{'precision': array([0.054719]), 'recall': array([0.17938524]), 'ndcg': array([0.15226463])}
EPOCH[441/1000] loss0.011-|Sample:4.83|
EPOCH[442/1000] loss0.011-|Sample:4.55|
EPOCH[443/1000] loss0.011-|Sample:5.05|
EPOCH[444/1000] loss0.012-|Sample:4.94|
EPOCH[445/1000] loss0.011-|Sample:5.48|
EPOCH[446/1000] loss0.011-|Sample:5.39|
EPOCH[447/1000] loss0.011-|Sample:4.69|
EPOCH[448/1000] loss0.012-|Sample:5.39|
EPOCH[449/1000] loss0.012-|Sample:4.95|
EPOCH[450/1000] loss0.011-|Sample:5.19|
[TEST]
{'precision': array([0.05482115]), 'recall': array([0.17971916]), 'ndcg': array([0.15247156])}
EPOCH[451/1000] loss0.012-|Sample:4.91|
EPOCH[452/1000] loss0.011-|Sample:4.97|
EPOCH[453/1000] loss0.011-|Sample:4.81|
EPOCH[454/1000] loss0.011-|Sample:5.00|
EPOCH[455/1000] loss0.012-|Sample:4.86|
EPOCH[456/1000] loss0.011-|Sample:4.97|
EPOCH[457/1000] loss0.011-|Sample:4.80|
EPOCH[458/1000] loss0.011-|Sample:5.00|
EPOCH[459/1000] loss0.011-|Sample:4.81|
EPOCH[460/1000] loss0.012-|Sample:4.94|
[TEST]
{'precision': array([0.05482618]), 'recall': array([0.17953135]), 'ndcg': array([0.15237127])}
EPOCH[461/1000] loss0.012-|Sample:5.00|
EPOCH[462/1000] loss0.012-|Sample:5.00|
EPOCH[463/1000] loss0.011-|Sample:4.94|
EPOCH[464/1000] loss0.012-|Sample:4.91|
EPOCH[465/1000] loss0.012-|Sample:4.64|
EPOCH[466/1000] loss0.011-|Sample:4.95|
EPOCH[467/1000] loss0.011-|Sample:4.84|
EPOCH[468/1000] loss0.011-|Sample:5.00|
EPOCH[469/1000] loss0.011-|Sample:5.33|
EPOCH[470/1000] loss0.011-|Sample:4.55|
[TEST]
{'precision': array([0.0547525]), 'recall': array([0.1793201]), 'ndcg': array([0.15230339])}
EPOCH[471/1000] loss0.011-|Sample:4.98|
EPOCH[472/1000] loss0.011-|Sample:4.91|
EPOCH[473/1000] loss0.012-|Sample:5.11|
EPOCH[474/1000] loss0.011-|Sample:4.95|
EPOCH[475/1000] loss0.011-|Sample:4.75|
EPOCH[476/1000] loss0.011-|Sample:5.03|
EPOCH[477/1000] loss0.011-|Sample:4.78|
EPOCH[478/1000] loss0.011-|Sample:5.05|
EPOCH[479/1000] loss0.011-|Sample:4.89|
EPOCH[480/1000] loss0.011-|Sample:4.78|
[TEST]
{'precision': array([0.05484627]), 'recall': array([0.17955061]), 'ndcg': array([0.15258876])}
EPOCH[481/1000] loss0.011-|Sample:5.00|
EPOCH[482/1000] loss0.011-|Sample:4.98|
EPOCH[483/1000] loss0.011-|Sample:4.64|
EPOCH[484/1000] loss0.011-|Sample:5.05|
EPOCH[485/1000] loss0.011-|Sample:4.95|
EPOCH[486/1000] loss0.011-|Sample:4.91|
EPOCH[487/1000] loss0.011-|Sample:5.17|
EPOCH[488/1000] loss0.011-|Sample:5.03|
EPOCH[489/1000] loss0.011-|Sample:4.89|
EPOCH[490/1000] loss0.011-|Sample:4.81|
[TEST]
{'precision': array([0.05486469]), 'recall': array([0.17936279]), 'ndcg': array([0.15255068])}
EPOCH[491/1000] loss0.011-|Sample:4.91|
EPOCH[492/1000] loss0.011-|Sample:5.31|
EPOCH[493/1000] loss0.011-|Sample:4.78|
EPOCH[494/1000] loss0.011-|Sample:5.05|
EPOCH[495/1000] loss0.011-|Sample:4.76|
EPOCH[496/1000] loss0.011-|Sample:5.17|
EPOCH[497/1000] loss0.011-|Sample:5.42|
EPOCH[498/1000] loss0.011-|Sample:4.72|
EPOCH[499/1000] loss0.011-|Sample:4.97|
EPOCH[500/1000] loss0.011-|Sample:4.81|
[TEST]
{'precision': array([0.05503718]), 'recall': array([0.17978106]), 'ndcg': array([0.15304498])}
EPOCH[501/1000] loss0.011-|Sample:4.70|
EPOCH[502/1000] loss0.011-|Sample:5.01|
EPOCH[503/1000] loss0.011-|Sample:5.16|
EPOCH[504/1000] loss0.011-|Sample:5.03|
EPOCH[505/1000] loss0.011-|Sample:5.00|
EPOCH[506/1000] loss0.011-|Sample:4.94|
EPOCH[507/1000] loss0.011-|Sample:5.06|
EPOCH[508/1000] loss0.011-|Sample:4.69|
EPOCH[509/1000] loss0.011-|Sample:4.98|
EPOCH[510/1000] loss0.011-|Sample:4.78|
[TEST]
{'precision': array([0.05502043]), 'recall': array([0.17993502]), 'ndcg': array([0.1526291])}
EPOCH[511/1000] loss0.011-|Sample:4.80|
EPOCH[512/1000] loss0.011-|Sample:4.97|
EPOCH[513/1000] loss0.011-|Sample:5.08|
EPOCH[514/1000] loss0.011-|Sample:5.03|
EPOCH[515/1000] loss0.011-|Sample:5.33|
EPOCH[516/1000] loss0.011-|Sample:4.62|
EPOCH[517/1000] loss0.011-|Sample:5.01|
EPOCH[518/1000] loss0.011-|Sample:4.89|
EPOCH[519/1000] loss0.011-|Sample:4.95|
EPOCH[520/1000] loss0.011-|Sample:4.91|
[TEST]
{'precision': array([0.0551611]), 'recall': array([0.18029092]), 'ndcg': array([0.15276895])}
EPOCH[521/1000] loss0.011-|Sample:4.67|
EPOCH[522/1000] loss0.011-|Sample:4.94|
EPOCH[523/1000] loss0.011-|Sample:4.98|
EPOCH[524/1000] loss0.011-|Sample:4.95|
EPOCH[525/1000] loss0.011-|Sample:5.45|
EPOCH[526/1000] loss0.011-|Sample:4.70|
EPOCH[527/1000] loss0.011-|Sample:5.41|
EPOCH[528/1000] loss0.011-|Sample:4.91|
EPOCH[529/1000] loss0.011-|Sample:4.92|
EPOCH[530/1000] loss0.011-|Sample:5.05|
[TEST]
{'precision': array([0.05518621]), 'recall': array([0.18035426]), 'ndcg': array([0.1530365])}
EPOCH[531/1000] loss0.011-|Sample:4.95|
EPOCH[532/1000] loss0.011-|Sample:4.83|
EPOCH[533/1000] loss0.011-|Sample:5.33|
EPOCH[534/1000] loss0.011-|Sample:4.66|
EPOCH[535/1000] loss0.011-|Sample:4.97|
EPOCH[536/1000] loss0.011-|Sample:4.97|
EPOCH[537/1000] loss0.011-|Sample:4.94|
EPOCH[538/1000] loss0.011-|Sample:4.92|
EPOCH[539/1000] loss0.011-|Sample:5.19|
EPOCH[540/1000] loss0.011-|Sample:4.97|
[TEST]
{'precision': array([0.05518287]), 'recall': array([0.18033392]), 'ndcg': array([0.15278808])}
EPOCH[541/1000] loss0.011-|Sample:4.78|
EPOCH[542/1000] loss0.011-|Sample:5.16|
EPOCH[543/1000] loss0.011-|Sample:4.86|
EPOCH[544/1000] loss0.011-|Sample:4.62|
EPOCH[545/1000] loss0.011-|Sample:5.37|
EPOCH[546/1000] loss0.011-|Sample:4.84|
EPOCH[547/1000] loss0.011-|Sample:5.05|
EPOCH[548/1000] loss0.011-|Sample:5.00|
EPOCH[549/1000] loss0.011-|Sample:4.61|
EPOCH[550/1000] loss0.011-|Sample:4.97|
[TEST]
{'precision': array([0.05540559]), 'recall': array([0.18099111]), 'ndcg': array([0.15298589])}
EPOCH[551/1000] loss0.011-|Sample:5.03|
EPOCH[552/1000] loss0.011-|Sample:4.73|
EPOCH[553/1000] loss0.011-|Sample:5.37|
EPOCH[554/1000] loss0.011-|Sample:4.75|
EPOCH[555/1000] loss0.011-|Sample:5.03|
EPOCH[556/1000] loss0.011-|Sample:4.92|
EPOCH[557/1000] loss0.011-|Sample:5.03|
EPOCH[558/1000] loss0.011-|Sample:4.94|
EPOCH[559/1000] loss0.011-|Sample:4.81|
EPOCH[560/1000] loss0.011-|Sample:5.25|
[TEST]
{'precision': array([0.05523813]), 'recall': array([0.18031592]), 'ndcg': array([0.15294281])}
EPOCH[561/1000] loss0.011-|Sample:4.95|
EPOCH[562/1000] loss0.011-|Sample:4.59|
EPOCH[563/1000] loss0.011-|Sample:5.01|
EPOCH[564/1000] loss0.011-|Sample:4.94|
EPOCH[565/1000] loss0.011-|Sample:4.87|
EPOCH[566/1000] loss0.011-|Sample:4.94|
EPOCH[567/1000] loss0.011-|Sample:4.73|
EPOCH[568/1000] loss0.011-|Sample:5.05|
EPOCH[569/1000] loss0.011-|Sample:4.83|
EPOCH[570/1000] loss0.011-|Sample:4.91|
[TEST]
{'precision': array([0.05513263]), 'recall': array([0.18010788]), 'ndcg': array([0.15292682])}
EPOCH[571/1000] loss0.011-|Sample:5.01|
EPOCH[572/1000] loss0.011-|Sample:4.51|
EPOCH[573/1000] loss0.011-|Sample:5.22|
EPOCH[574/1000] loss0.011-|Sample:4.91|
EPOCH[575/1000] loss0.011-|Sample:4.91|
EPOCH[576/1000] loss0.011-|Sample:4.97|
EPOCH[577/1000] loss0.011-|Sample:4.72|
EPOCH[578/1000] loss0.011-|Sample:5.25|
EPOCH[579/1000] loss0.011-|Sample:4.86|
EPOCH[580/1000] loss0.011-|Sample:4.95|
[TEST]
{'precision': array([0.05528669]), 'recall': array([0.18051553]), 'ndcg': array([0.1529463])}
EPOCH[581/1000] loss0.011-|Sample:4.89|
EPOCH[582/1000] loss0.011-|Sample:5.16|
EPOCH[583/1000] loss0.011-|Sample:4.81|
EPOCH[584/1000] loss0.011-|Sample:4.89|
EPOCH[585/1000] loss0.011-|Sample:4.61|
EPOCH[586/1000] loss0.011-|Sample:5.16|
EPOCH[587/1000] loss0.011-|Sample:4.62|
EPOCH[588/1000] loss0.011-|Sample:4.95|
EPOCH[589/1000] loss0.011-|Sample:4.73|
EPOCH[590/1000] loss0.011-|Sample:5.01|
[TEST]
{'precision': array([0.05541898]), 'recall': array([0.18078832]), 'ndcg': array([0.1534311])}
EPOCH[591/1000] loss0.011-|Sample:4.87|
EPOCH[592/1000] loss0.011-|Sample:4.81|
EPOCH[593/1000] loss0.011-|Sample:4.94|
EPOCH[594/1000] loss0.011-|Sample:5.00|
EPOCH[595/1000] loss0.011-|Sample:4.72|
EPOCH[596/1000] loss0.011-|Sample:5.03|
EPOCH[597/1000] loss0.011-|Sample:4.86|
EPOCH[598/1000] loss0.011-|Sample:4.98|
EPOCH[599/1000] loss0.011-|Sample:5.61|
EPOCH[600/1000] loss0.011-|Sample:4.64|
[TEST]
{'precision': array([0.05524148]), 'recall': array([0.18062336]), 'ndcg': array([0.15329776])}
EPOCH[601/1000] loss0.011-|Sample:5.05|
EPOCH[602/1000] loss0.011-|Sample:5.01|
EPOCH[603/1000] loss0.011-|Sample:4.87|
EPOCH[604/1000] loss0.011-|Sample:5.05|
EPOCH[605/1000] loss0.011-|Sample:4.70|
EPOCH[606/1000] loss0.011-|Sample:5.08|
EPOCH[607/1000] loss0.011-|Sample:4.86|
EPOCH[608/1000] loss0.011-|Sample:5.14|
EPOCH[609/1000] loss0.011-|Sample:5.12|
EPOCH[610/1000] loss0.011-|Sample:4.64|
[TEST]
{'precision': array([0.05535535]), 'recall': array([0.18057312]), 'ndcg': array([0.15349793])}
EPOCH[611/1000] loss0.011-|Sample:5.06|
EPOCH[612/1000] loss0.011-|Sample:5.01|
EPOCH[613/1000] loss0.011-|Sample:4.70|
EPOCH[614/1000] loss0.011-|Sample:4.92|
EPOCH[615/1000] loss0.011-|Sample:4.97|
EPOCH[616/1000] loss0.011-|Sample:4.98|
EPOCH[617/1000] loss0.011-|Sample:5.33|
EPOCH[618/1000] loss0.011-|Sample:4.70|
EPOCH[619/1000] loss0.011-|Sample:5.03|
EPOCH[620/1000] loss0.011-|Sample:4.76|
[TEST]
{'precision': array([0.05548429]), 'recall': array([0.18111933]), 'ndcg': array([0.15346299])}
EPOCH[621/1000] loss0.011-|Sample:4.92|
EPOCH[622/1000] loss0.011-|Sample:4.97|
EPOCH[623/1000] loss0.011-|Sample:4.66|
EPOCH[624/1000] loss0.011-|Sample:4.98|
EPOCH[625/1000] loss0.011-|Sample:4.97|
EPOCH[626/1000] loss0.011-|Sample:5.25|
EPOCH[627/1000] loss0.011-|Sample:5.80|
EPOCH[628/1000] loss0.011-|Sample:4.67|
EPOCH[629/1000] loss0.011-|Sample:5.08|
EPOCH[630/1000] loss0.011-|Sample:4.83|
[TEST]
{'precision': array([0.05545415]), 'recall': array([0.18088518]), 'ndcg': array([0.15350267])}
EPOCH[631/1000] loss0.011-|Sample:4.81|
EPOCH[632/1000] loss0.011-|Sample:5.12|
EPOCH[633/1000] loss0.011-|Sample:4.91|
EPOCH[634/1000] loss0.011-|Sample:4.80|
EPOCH[635/1000] loss0.011-|Sample:5.22|
EPOCH[636/1000] loss0.011-|Sample:4.92|
EPOCH[637/1000] loss0.011-|Sample:4.89|
EPOCH[638/1000] loss0.011-|Sample:4.76|
EPOCH[639/1000] loss0.011-|Sample:5.12|
EPOCH[640/1000] loss0.011-|Sample:4.94|
[TEST]
{'precision': array([0.05559314]), 'recall': array([0.1808055]), 'ndcg': array([0.15386604])}
EPOCH[641/1000] loss0.011-|Sample:4.92|
EPOCH[642/1000] loss0.011-|Sample:4.98|
EPOCH[643/1000] loss0.011-|Sample:5.11|
EPOCH[644/1000] loss0.011-|Sample:4.84|
EPOCH[645/1000] loss0.011-|Sample:4.98|
EPOCH[646/1000] loss0.011-|Sample:4.72|
EPOCH[647/1000] loss0.011-|Sample:4.87|
EPOCH[648/1000] loss0.011-|Sample:5.30|
EPOCH[649/1000] loss0.011-|Sample:4.75|
EPOCH[650/1000] loss0.011-|Sample:5.08|
[TEST]
{'precision': array([0.05548429]), 'recall': array([0.18074537]), 'ndcg': array([0.15368634])}
EPOCH[651/1000] loss0.011-|Sample:4.97|
EPOCH[652/1000] loss0.011-|Sample:4.95|
EPOCH[653/1000] loss0.011-|Sample:4.91|
EPOCH[654/1000] loss0.011-|Sample:4.86|
EPOCH[655/1000] loss0.011-|Sample:4.91|
EPOCH[656/1000] loss0.011-|Sample:4.67|
EPOCH[657/1000] loss0.011-|Sample:5.23|
EPOCH[658/1000] loss0.011-|Sample:4.92|
EPOCH[659/1000] loss0.011-|Sample:4.87|
EPOCH[660/1000] loss0.011-|Sample:5.34|
[TEST]
{'precision': array([0.05555965]), 'recall': array([0.18109457]), 'ndcg': array([0.15376434])}
EPOCH[661/1000] loss0.011-|Sample:5.12|
EPOCH[662/1000] loss0.011-|Sample:4.51|
EPOCH[663/1000] loss0.011-|Sample:4.94|
EPOCH[664/1000] loss0.011-|Sample:5.03|
EPOCH[665/1000] loss0.011-|Sample:4.92|
EPOCH[666/1000] loss0.011-|Sample:4.94|
EPOCH[667/1000] loss0.011-|Sample:4.73|
EPOCH[668/1000] loss0.011-|Sample:5.37|
EPOCH[669/1000] loss0.011-|Sample:4.86|
EPOCH[670/1000] loss0.011-|Sample:5.00|
[TEST]
{'precision': array([0.05546587]), 'recall': array([0.18097307]), 'ndcg': array([0.15377084])}
EPOCH[671/1000] loss0.011-|Sample:5.44|
EPOCH[672/1000] loss0.011-|Sample:4.67|
EPOCH[673/1000] loss0.011-|Sample:4.98|
EPOCH[674/1000] loss0.011-|Sample:4.87|
EPOCH[675/1000] loss0.011-|Sample:5.31|
EPOCH[676/1000] loss0.011-|Sample:5.26|
EPOCH[677/1000] loss0.011-|Sample:4.58|
EPOCH[678/1000] loss0.011-|Sample:4.94|
EPOCH[679/1000] loss0.011-|Sample:5.06|
EPOCH[680/1000] loss0.011-|Sample:5.00|
[TEST]
{'precision': array([0.05561156]), 'recall': array([0.18127061]), 'ndcg': array([0.15408568])}
EPOCH[681/1000] loss0.011-|Sample:4.94|
EPOCH[682/1000] loss0.011-|Sample:5.30|
EPOCH[683/1000] loss0.011-|Sample:4.78|
EPOCH[684/1000] loss0.011-|Sample:5.41|
EPOCH[685/1000] loss0.011-|Sample:4.92|
EPOCH[686/1000] loss0.011-|Sample:5.05|
EPOCH[687/1000] loss0.011-|Sample:4.67|
EPOCH[688/1000] loss0.011-|Sample:5.67|
EPOCH[689/1000] loss0.011-|Sample:4.86|
EPOCH[690/1000] loss0.011-|Sample:4.97|
[TEST]
{'precision': array([0.05552113]), 'recall': array([0.18084729]), 'ndcg': array([0.15382485])}
EPOCH[691/1000] loss0.011-|Sample:5.05|
EPOCH[692/1000] loss0.011-|Sample:4.94|
EPOCH[693/1000] loss0.011-|Sample:4.86|
EPOCH[694/1000] loss0.011-|Sample:5.23|
EPOCH[695/1000] loss0.011-|Sample:4.67|
EPOCH[696/1000] loss0.011-|Sample:5.16|
EPOCH[697/1000] loss0.011-|Sample:4.87|
EPOCH[698/1000] loss0.011-|Sample:4.87|
EPOCH[699/1000] loss0.011-|Sample:4.92|
EPOCH[700/1000] loss0.011-|Sample:4.64|
[TEST]
{'precision': array([0.05549267]), 'recall': array([0.18122717]), 'ndcg': array([0.15383245])}
EPOCH[701/1000] loss0.011-|Sample:5.12|
EPOCH[702/1000] loss0.011-|Sample:4.92|
EPOCH[703/1000] loss0.011-|Sample:5.19|
EPOCH[704/1000] loss0.011-|Sample:5.26|
EPOCH[705/1000] loss0.011-|Sample:4.69|
EPOCH[706/1000] loss0.011-|Sample:4.97|
EPOCH[707/1000] loss0.011-|Sample:5.00|
EPOCH[708/1000] loss0.011-|Sample:5.00|
EPOCH[709/1000] loss0.011-|Sample:4.97|
EPOCH[710/1000] loss0.011-|Sample:4.58|
[TEST]
{'precision': array([0.05565175]), 'recall': array([0.18149653]), 'ndcg': array([0.15422681])}
EPOCH[711/1000] loss0.011-|Sample:4.76|
EPOCH[712/1000] loss0.011-|Sample:4.97|
EPOCH[713/1000] loss0.011-|Sample:4.78|
EPOCH[714/1000] loss0.011-|Sample:5.03|
EPOCH[715/1000] loss0.011-|Sample:5.00|
EPOCH[716/1000] loss0.011-|Sample:4.73|
EPOCH[717/1000] loss0.011-|Sample:5.40|
EPOCH[718/1000] loss0.011-|Sample:4.84|
EPOCH[719/1000] loss0.011-|Sample:5.06|
EPOCH[720/1000] loss0.011-|Sample:4.61|
[TEST]
{'precision': array([0.05570701]), 'recall': array([0.1819455]), 'ndcg': array([0.15426854])}
EPOCH[721/1000] loss0.011-|Sample:4.89|
EPOCH[722/1000] loss0.011-|Sample:5.05|
EPOCH[723/1000] loss0.011-|Sample:4.80|
EPOCH[724/1000] loss0.011-|Sample:5.26|
EPOCH[725/1000] loss0.011-|Sample:5.26|
EPOCH[726/1000] loss0.011-|Sample:4.76|
EPOCH[727/1000] loss0.011-|Sample:4.94|
EPOCH[728/1000] loss0.011-|Sample:4.78|
EPOCH[729/1000] loss0.011-|Sample:5.08|
EPOCH[730/1000] loss0.011-|Sample:5.08|
[TEST]
{'precision': array([0.05567352]), 'recall': array([0.1818844]), 'ndcg': array([0.15393826])}
EPOCH[731/1000] loss0.011-|Sample:4.94|
EPOCH[732/1000] loss0.011-|Sample:5.05|
EPOCH[733/1000] loss0.011-|Sample:4.91|
EPOCH[734/1000] loss0.011-|Sample:4.98|
EPOCH[735/1000] loss0.011-|Sample:4.97|
EPOCH[736/1000] loss0.011-|Sample:4.98|
EPOCH[737/1000] loss0.011-|Sample:4.91|
EPOCH[738/1000] loss0.011-|Sample:4.76|
EPOCH[739/1000] loss0.011-|Sample:5.33|
EPOCH[740/1000] loss0.011-|Sample:5.06|
[TEST]
{'precision': array([0.05559816]), 'recall': array([0.18162387]), 'ndcg': array([0.15375183])}
EPOCH[741/1000] loss0.011-|Sample:4.86|
EPOCH[742/1000] loss0.011-|Sample:4.98|
EPOCH[743/1000] loss0.011-|Sample:4.91|
EPOCH[744/1000] loss0.011-|Sample:4.67|
EPOCH[745/1000] loss0.011-|Sample:4.91|
EPOCH[746/1000] loss0.011-|Sample:4.95|
EPOCH[747/1000] loss0.011-|Sample:5.01|
EPOCH[748/1000] loss0.011-|Sample:5.00|
EPOCH[749/1000] loss0.011-|Sample:4.73|
EPOCH[750/1000] loss0.011-|Sample:4.97|
[TEST]
{'precision': array([0.05559482]), 'recall': array([0.18124867]), 'ndcg': array([0.15379434])}
EPOCH[751/1000] loss0.011-|Sample:4.89|
EPOCH[752/1000] loss0.011-|Sample:5.01|
EPOCH[753/1000] loss0.011-|Sample:4.92|
EPOCH[754/1000] loss0.011-|Sample:4.72|
EPOCH[755/1000] loss0.011-|Sample:5.08|
EPOCH[756/1000] loss0.011-|Sample:4.84|
EPOCH[757/1000] loss0.011-|Sample:4.94|
EPOCH[758/1000] loss0.011-|Sample:5.30|
EPOCH[759/1000] loss0.011-|Sample:4.75|
EPOCH[760/1000] loss0.011-|Sample:5.05|
[TEST]
{'precision': array([0.05556635]), 'recall': array([0.18140409]), 'ndcg': array([0.15395526])}
EPOCH[761/1000] loss0.011-|Sample:5.34|
EPOCH[762/1000] loss0.011-|Sample:4.55|
EPOCH[763/1000] loss0.011-|Sample:4.94|
EPOCH[764/1000] loss0.011-|Sample:5.33|
EPOCH[765/1000] loss0.011-|Sample:4.81|
EPOCH[766/1000] loss0.011-|Sample:5.03|
EPOCH[767/1000] loss0.011-|Sample:4.81|
EPOCH[768/1000] loss0.011-|Sample:4.95|
EPOCH[769/1000] loss0.011-|Sample:4.76|
EPOCH[770/1000] loss0.011-|Sample:4.95|
[TEST]
{'precision': array([0.05553453]), 'recall': array([0.1810276]), 'ndcg': array([0.15403757])}
EPOCH[771/1000] loss0.011-|Sample:5.00|
EPOCH[772/1000] loss0.011-|Sample:4.66|
EPOCH[773/1000] loss0.011-|Sample:4.97|
EPOCH[774/1000] loss0.011-|Sample:4.94|
EPOCH[775/1000] loss0.011-|Sample:4.97|
EPOCH[776/1000] loss0.011-|Sample:4.98|
EPOCH[777/1000] loss0.011-|Sample:4.59|
EPOCH[778/1000] loss0.011-|Sample:4.95|
EPOCH[779/1000] loss0.011-|Sample:4.75|
EPOCH[780/1000] loss0.011-|Sample:4.94|
[TEST]
{'precision': array([0.05552448]), 'recall': array([0.1809378]), 'ndcg': array([0.15405535])}
EPOCH[781/1000] loss0.011-|Sample:4.91|
EPOCH[782/1000] loss0.011-|Sample:4.97|
EPOCH[783/1000] loss0.011-|Sample:5.25|
EPOCH[784/1000] loss0.011-|Sample:4.84|
EPOCH[785/1000] loss0.011-|Sample:4.95|
EPOCH[786/1000] loss0.011-|Sample:5.00|
EPOCH[787/1000] loss0.011-|Sample:4.83|
EPOCH[788/1000] loss0.011-|Sample:5.12|
EPOCH[789/1000] loss0.011-|Sample:4.72|
EPOCH[790/1000] loss0.011-|Sample:5.00|
[TEST]
{'precision': array([0.05567855]), 'recall': array([0.18162049]), 'ndcg': array([0.1543842])}
EPOCH[791/1000] loss0.011-|Sample:4.89|
EPOCH[792/1000] loss0.011-|Sample:4.95|
EPOCH[793/1000] loss0.011-|Sample:4.94|
EPOCH[794/1000] loss0.011-|Sample:5.44|
EPOCH[795/1000] loss0.011-|Sample:4.61|
EPOCH[796/1000] loss0.011-|Sample:4.98|
EPOCH[797/1000] loss0.011-|Sample:5.17|
EPOCH[798/1000] loss0.011-|Sample:4.95|
EPOCH[799/1000] loss0.011-|Sample:5.20|
EPOCH[800/1000] loss0.011-|Sample:4.89|
[TEST]
{'precision': array([0.05579409]), 'recall': array([0.18176227]), 'ndcg': array([0.15426972])}
EPOCH[801/1000] loss0.011-|Sample:4.95|
EPOCH[802/1000] loss0.011-|Sample:5.01|
EPOCH[803/1000] loss0.011-|Sample:4.91|
EPOCH[804/1000] loss0.011-|Sample:5.26|
EPOCH[805/1000] loss0.011-|Sample:4.69|
EPOCH[806/1000] loss0.011-|Sample:5.05|
EPOCH[807/1000] loss0.011-|Sample:4.72|
EPOCH[808/1000] loss0.011-|Sample:5.37|
EPOCH[809/1000] loss0.011-|Sample:5.22|
EPOCH[810/1000] loss0.011-|Sample:4.72|
[TEST]
{'precision': array([0.05561324]), 'recall': array([0.1813722]), 'ndcg': array([0.15397839])}
EPOCH[811/1000] loss0.011-|Sample:4.87|
EPOCH[812/1000] loss0.011-|Sample:4.92|
EPOCH[813/1000] loss0.011-|Sample:4.76|
EPOCH[814/1000] loss0.011-|Sample:4.89|
EPOCH[815/1000] loss0.011-|Sample:4.98|
EPOCH[816/1000] loss0.011-|Sample:5.30|
EPOCH[817/1000] loss0.011-|Sample:4.83|
EPOCH[818/1000] loss0.011-|Sample:5.50|
EPOCH[819/1000] loss0.011-|Sample:5.05|
EPOCH[820/1000] loss0.011-|Sample:4.69|
[TEST]
{'precision': array([0.05563668]), 'recall': array([0.18112953]), 'ndcg': array([0.15398688])}
EPOCH[821/1000] loss0.011-|Sample:4.76|
EPOCH[822/1000] loss0.011-|Sample:4.91|
EPOCH[823/1000] loss0.011-|Sample:4.67|
EPOCH[824/1000] loss0.011-|Sample:4.89|
EPOCH[825/1000] loss0.011-|Sample:4.98|
EPOCH[826/1000] loss0.011-|Sample:4.83|
EPOCH[827/1000] loss0.011-|Sample:5.05|
EPOCH[828/1000] loss0.011-|Sample:4.67|
EPOCH[829/1000] loss0.011-|Sample:5.25|
EPOCH[830/1000] loss0.011-|Sample:5.05|
[TEST]
{'precision': array([0.05573548]), 'recall': array([0.18182884]), 'ndcg': array([0.15409207])}
EPOCH[831/1000] loss0.011-|Sample:4.86|
EPOCH[832/1000] loss0.011-|Sample:4.98|
EPOCH[833/1000] loss0.011-|Sample:4.64|
EPOCH[834/1000] loss0.011-|Sample:4.95|
EPOCH[835/1000] loss0.011-|Sample:4.91|
EPOCH[836/1000] loss0.011-|Sample:5.03|
EPOCH[837/1000] loss0.011-|Sample:4.97|
EPOCH[838/1000] loss0.011-|Sample:4.67|
EPOCH[839/1000] loss0.011-|Sample:5.34|
EPOCH[840/1000] loss0.011-|Sample:4.91|
[TEST]
{'precision': array([0.05573716]), 'recall': array([0.18141237]), 'ndcg': array([0.15392967])}
EPOCH[841/1000] loss0.011-|Sample:4.87|
EPOCH[842/1000] loss0.011-|Sample:4.92|
EPOCH[843/1000] loss0.011-|Sample:4.95|
EPOCH[844/1000] loss0.011-|Sample:4.73|
EPOCH[845/1000] loss0.011-|Sample:4.91|
EPOCH[846/1000] loss0.011-|Sample:4.75|
EPOCH[847/1000] loss0.011-|Sample:5.11|
EPOCH[848/1000] loss0.011-|Sample:5.01|
EPOCH[849/1000] loss0.011-|Sample:4.86|
EPOCH[850/1000] loss0.011-|Sample:4.86|
[TEST]
{'precision': array([0.05569027]), 'recall': array([0.1817523]), 'ndcg': array([0.15391257])}
EPOCH[851/1000] loss0.011-|Sample:4.76|
EPOCH[852/1000] loss0.011-|Sample:5.51|
EPOCH[853/1000] loss0.011-|Sample:5.19|
EPOCH[854/1000] loss0.011-|Sample:4.80|
EPOCH[855/1000] loss0.011-|Sample:4.95|
EPOCH[856/1000] loss0.011-|Sample:4.76|
EPOCH[857/1000] loss0.011-|Sample:5.16|
EPOCH[858/1000] loss0.011-|Sample:4.98|
EPOCH[859/1000] loss0.011-|Sample:4.83|
EPOCH[860/1000] loss0.011-|Sample:5.31|
[TEST]
{'precision': array([0.05568022]), 'recall': array([0.18153489]), 'ndcg': array([0.15421003])}
EPOCH[861/1000] loss0.011-|Sample:5.00|
EPOCH[862/1000] loss0.011-|Sample:4.56|
EPOCH[863/1000] loss0.011-|Sample:4.97|
EPOCH[864/1000] loss0.011-|Sample:4.92|
EPOCH[865/1000] loss0.011-|Sample:5.01|
EPOCH[866/1000] loss0.011-|Sample:4.67|
EPOCH[867/1000] loss0.011-|Sample:4.92|
EPOCH[868/1000] loss0.011-|Sample:5.01|
EPOCH[869/1000] loss0.011-|Sample:5.03|
EPOCH[870/1000] loss0.011-|Sample:5.09|
[TEST]
{'precision': array([0.05572543]), 'recall': array([0.18153236]), 'ndcg': array([0.15424586])}
EPOCH[871/1000] loss0.011-|Sample:5.23|
EPOCH[872/1000] loss0.011-|Sample:4.66|
EPOCH[873/1000] loss0.011-|Sample:5.03|
EPOCH[874/1000] loss0.011-|Sample:4.73|
EPOCH[875/1000] loss0.011-|Sample:4.98|
EPOCH[876/1000] loss0.011-|Sample:4.92|
EPOCH[877/1000] loss0.011-|Sample:4.78|
EPOCH[878/1000] loss0.011-|Sample:4.97|
EPOCH[879/1000] loss0.011-|Sample:4.83|
EPOCH[880/1000] loss0.011-|Sample:5.01|
[TEST]
{'precision': array([0.05579242]), 'recall': array([0.18157219]), 'ndcg': array([0.15418516])}
EPOCH[881/1000] loss0.011-|Sample:4.97|
EPOCH[882/1000] loss0.011-|Sample:4.81|
EPOCH[883/1000] loss0.011-|Sample:5.37|
EPOCH[884/1000] loss0.011-|Sample:4.76|
EPOCH[885/1000] loss0.011-|Sample:5.05|
EPOCH[886/1000] loss0.011-|Sample:5.22|
EPOCH[887/1000] loss0.011-|Sample:4.92|
EPOCH[888/1000] loss0.011-|Sample:5.28|
EPOCH[889/1000] loss0.011-|Sample:4.73|
EPOCH[890/1000] loss0.011-|Sample:5.14|
[TEST]
{'precision': array([0.05591299]), 'recall': array([0.18193361]), 'ndcg': array([0.1545135])}
EPOCH[891/1000] loss0.011-|Sample:5.12|
EPOCH[892/1000] loss0.011-|Sample:4.89|
EPOCH[893/1000] loss0.011-|Sample:4.97|
EPOCH[894/1000] loss0.011-|Sample:5.03|
EPOCH[895/1000] loss0.011-|Sample:4.62|
EPOCH[896/1000] loss0.011-|Sample:4.95|
EPOCH[897/1000] loss0.011-|Sample:4.86|
EPOCH[898/1000] loss0.011-|Sample:5.12|
EPOCH[899/1000] loss0.011-|Sample:4.72|
EPOCH[900/1000] loss0.011-|Sample:5.58|
[TEST]
{'precision': array([0.05585773]), 'recall': array([0.18188082]), 'ndcg': array([0.15449395])}
EPOCH[901/1000] loss0.011-|Sample:5.50|
EPOCH[902/1000] loss0.011-|Sample:4.91|
EPOCH[903/1000] loss0.011-|Sample:4.97|
EPOCH[904/1000] loss0.011-|Sample:5.00|
EPOCH[905/1000] loss0.011-|Sample:4.76|
EPOCH[906/1000] loss0.011-|Sample:5.12|
EPOCH[907/1000] loss0.011-|Sample:4.89|
EPOCH[908/1000] loss0.011-|Sample:5.06|
EPOCH[909/1000] loss0.011-|Sample:5.06|
EPOCH[910/1000] loss0.011-|Sample:4.58|
[TEST]
{'precision': array([0.05581586]), 'recall': array([0.18183852]), 'ndcg': array([0.15431759])}
EPOCH[911/1000] loss0.011-|Sample:4.81|
EPOCH[912/1000] loss0.011-|Sample:5.22|
EPOCH[913/1000] loss0.011-|Sample:4.80|
EPOCH[914/1000] loss0.011-|Sample:5.17|
EPOCH[915/1000] loss0.011-|Sample:4.69|
EPOCH[916/1000] loss0.011-|Sample:4.92|
EPOCH[917/1000] loss0.011-|Sample:4.89|
EPOCH[918/1000] loss0.011-|Sample:4.91|
EPOCH[919/1000] loss0.011-|Sample:4.98|
EPOCH[920/1000] loss0.011-|Sample:4.72|
[TEST]
{'precision': array([0.05581084]), 'recall': array([0.18172574]), 'ndcg': array([0.15452816])}
EPOCH[921/1000] loss0.011-|Sample:4.92|
EPOCH[922/1000] loss0.011-|Sample:4.95|
EPOCH[923/1000] loss0.011-|Sample:4.66|
EPOCH[924/1000] loss0.011-|Sample:5.19|
EPOCH[925/1000] loss0.011-|Sample:5.03|
EPOCH[926/1000] loss0.011-|Sample:4.95|
EPOCH[927/1000] loss0.011-|Sample:5.00|
EPOCH[928/1000] loss0.011-|Sample:4.67|
EPOCH[929/1000] loss0.011-|Sample:5.05|
EPOCH[930/1000] loss0.011-|Sample:5.01|
[TEST]
{'precision': array([0.05588452]), 'recall': array([0.18172663]), 'ndcg': array([0.15444992])}
EPOCH[931/1000] loss0.011-|Sample:4.81|
EPOCH[932/1000] loss0.011-|Sample:5.30|
EPOCH[933/1000] loss0.011-|Sample:4.66|
EPOCH[934/1000] loss0.011-|Sample:5.00|
EPOCH[935/1000] loss0.011-|Sample:4.95|
EPOCH[936/1000] loss0.011-|Sample:4.92|
EPOCH[937/1000] loss0.011-|Sample:4.92|
EPOCH[938/1000] loss0.011-|Sample:4.69|
EPOCH[939/1000] loss0.011-|Sample:5.03|
EPOCH[940/1000] loss0.011-|Sample:4.95|
[TEST]
{'precision': array([0.05586777]), 'recall': array([0.18197634]), 'ndcg': array([0.15431776])}
EPOCH[941/1000] loss0.011-|Sample:4.95|
EPOCH[942/1000] loss0.011-|Sample:5.17|
EPOCH[943/1000] loss0.011-|Sample:5.31|
EPOCH[944/1000] loss0.011-|Sample:4.67|
EPOCH[945/1000] loss0.011-|Sample:4.98|
EPOCH[946/1000] loss0.011-|Sample:4.97|
EPOCH[947/1000] loss0.011-|Sample:4.94|
EPOCH[948/1000] loss0.011-|Sample:4.70|
EPOCH[949/1000] loss0.011-|Sample:4.94|
EPOCH[950/1000] loss0.011-|Sample:4.91|
[TEST]
{'precision': array([0.05596155]), 'recall': array([0.18250429]), 'ndcg': array([0.15455456])}
EPOCH[951/1000] loss0.011-|Sample:4.83|
EPOCH[952/1000] loss0.011-|Sample:4.92|
EPOCH[953/1000] loss0.011-|Sample:5.01|
EPOCH[954/1000] loss0.011-|Sample:4.80|
EPOCH[955/1000] loss0.011-|Sample:5.80|
EPOCH[956/1000] loss0.011-|Sample:4.76|
EPOCH[957/1000] loss0.011-|Sample:4.91|
EPOCH[958/1000] loss0.011-|Sample:5.11|
EPOCH[959/1000] loss0.011-|Sample:4.80|
EPOCH[960/1000] loss0.011-|Sample:4.97|
[TEST]
{'precision': array([0.05594815]), 'recall': array([0.18233179]), 'ndcg': array([0.15447395])}
EPOCH[961/1000] loss0.011-|Sample:4.95|
EPOCH[962/1000] loss0.011-|Sample:4.58|
EPOCH[963/1000] loss0.011-|Sample:5.34|
EPOCH[964/1000] loss0.011-|Sample:4.69|
EPOCH[965/1000] loss0.011-|Sample:5.12|
EPOCH[966/1000] loss0.011-|Sample:4.73|
EPOCH[967/1000] loss0.011-|Sample:5.08|
EPOCH[968/1000] loss0.011-|Sample:5.03|
EPOCH[969/1000] loss0.011-|Sample:4.94|
EPOCH[970/1000] loss0.011-|Sample:4.92|
[TEST]
{'precision': array([0.05580414]), 'recall': array([0.18187222]), 'ndcg': array([0.15428171])}
EPOCH[971/1000] loss0.011-|Sample:5.08|
EPOCH[972/1000] loss0.011-|Sample:4.59|
EPOCH[973/1000] loss0.011-|Sample:4.98|
EPOCH[974/1000] loss0.011-|Sample:4.95|
EPOCH[975/1000] loss0.011-|Sample:5.00|
EPOCH[976/1000] loss0.011-|Sample:4.91|
EPOCH[977/1000] loss0.011-|Sample:4.66|
EPOCH[978/1000] loss0.011-|Sample:5.08|
EPOCH[979/1000] loss0.011-|Sample:4.76|
EPOCH[980/1000] loss0.011-|Sample:5.08|
[TEST]
{'precision': array([0.05574553]), 'recall': array([0.18143499]), 'ndcg': array([0.15401571])}
EPOCH[981/1000] loss0.011-|Sample:4.91|
EPOCH[982/1000] loss0.011-|Sample:4.78|
EPOCH[983/1000] loss0.011-|Sample:4.94|
EPOCH[984/1000] loss0.011-|Sample:4.84|
EPOCH[985/1000] loss0.011-|Sample:5.00|
EPOCH[986/1000] loss0.011-|Sample:4.94|
EPOCH[987/1000] loss0.011-|Sample:4.76|
EPOCH[988/1000] loss0.011-|Sample:4.95|
EPOCH[989/1000] loss0.011-|Sample:4.69|
EPOCH[990/1000] loss0.011-|Sample:4.98|
[TEST]
{'precision': array([0.05582926]), 'recall': array([0.18211619]), 'ndcg': array([0.1544676])}
EPOCH[991/1000] loss0.011-|Sample:5.01|
EPOCH[992/1000] loss0.011-|Sample:5.28|
EPOCH[993/1000] loss0.011-|Sample:5.00|
EPOCH[994/1000] loss0.011-|Sample:4.97|
EPOCH[995/1000] loss0.011-|Sample:4.66|
EPOCH[996/1000] loss0.011-|Sample:5.06|
EPOCH[997/1000] loss0.011-|Sample:4.87|
EPOCH[998/1000] loss0.011-|Sample:5.05|
EPOCH[999/1000] loss0.011-|Sample:4.72|
EPOCH[1000/1000] loss0.011-|Sample:5.01|

Process finished with exit code 0


New Computer model=MF
D:\ProgramFiles\Anaconda3\envs\image_caption_python36\python.exe D:/workspace/LightGcn/LightGCN-PyTorch-master/code/main.py
Cpp extension not loaded
>>SEED: 2020
loading [../data/gowalla]
810128 interactions for training
217242 interactions for testing
gowalla Sparsity : 0.0008396216228570436
gowalla is ready to go
===========config================
{'A_n_fold': 100,
 'A_split': False,
 'bigdata': False,
 'bpr_batch_size': 2048,
 'decay': 0.0001,
 'dropout': 0,
 'keep_prob': 0.6,
 'latent_dim_rec': 64,
 'lightGCN_n_layers': 3,
 'lr': 0.001,
 'multicore': 0,
 'pretrain': 0,
 'test_u_batch_size': 100}
cores for test: 6
comment: lgn
tensorboard: 1
LOAD: 0
Weight path: ./checkpoints
Test Topks: [20]
using bpr loss
===========end===================
using Normal distribution N(0,1) initialization for PureMF
load and save to /home/qhc/下载/LightGCN-PyTorch-master\code\checkpoints\mf-gowalla-64.pth.tar
[TEST]
{'precision': array([0.00057271]), 'recall': array([0.00147738]), 'ndcg': array([0.0009998])}
EPOCH[1/1000] loss4.420-|Sample:5.05|
EPOCH[2/1000] loss4.113-|Sample:5.28|
EPOCH[3/1000] loss3.826-|Sample:4.86|
EPOCH[4/1000] loss3.575-|Sample:5.05|
EPOCH[5/1000] loss3.328-|Sample:5.08|
EPOCH[6/1000] loss3.115-|Sample:5.16|
EPOCH[7/1000] loss2.909-|Sample:4.91|
EPOCH[8/1000] loss2.723-|Sample:5.19|
EPOCH[9/1000] loss2.557-|Sample:5.54|
EPOCH[10/1000] loss2.410-|Sample:5.20|
[TEST]
{'precision': array([0.00037343]), 'recall': array([0.00100581]), 'ndcg': array([0.00064691])}
EPOCH[11/1000] loss2.253-|Sample:5.73|
EPOCH[12/1000] loss2.116-|Sample:5.58|
EPOCH[13/1000] loss2.005-|Sample:6.65|
EPOCH[14/1000] loss1.895-|Sample:6.30|
EPOCH[15/1000] loss1.782-|Sample:6.42|
EPOCH[16/1000] loss1.686-|Sample:6.30|
EPOCH[17/1000] loss1.606-|Sample:5.75|
EPOCH[18/1000] loss1.510-|Sample:5.12|
EPOCH[19/1000] loss1.439-|Sample:5.55|
EPOCH[20/1000] loss1.367-|Sample:5.48|
[TEST]
{'precision': array([0.00033324]), 'recall': array([0.00096508]), 'ndcg': array([0.00062291])}
EPOCH[21/1000] loss1.294-|Sample:5.61|
EPOCH[22/1000] loss1.225-|Sample:5.34|
EPOCH[23/1000] loss1.174-|Sample:5.51|
EPOCH[24/1000] loss1.116-|Sample:5.37|
EPOCH[25/1000] loss1.058-|Sample:5.50|
EPOCH[26/1000] loss1.008-|Sample:5.37|
EPOCH[27/1000] loss0.959-|Sample:5.22|
EPOCH[28/1000] loss0.919-|Sample:5.59|
EPOCH[29/1000] loss0.879-|Sample:5.40|
EPOCH[30/1000] loss0.839-|Sample:5.55|
[TEST]
{'precision': array([0.00046386]), 'recall': array([0.00145191]), 'ndcg': array([0.00086185])}
EPOCH[31/1000] loss0.802-|Sample:5.12|
EPOCH[32/1000] loss0.765-|Sample:5.33|
EPOCH[33/1000] loss0.729-|Sample:5.31|
EPOCH[34/1000] loss0.696-|Sample:5.44|
EPOCH[35/1000] loss0.667-|Sample:5.55|
EPOCH[36/1000] loss0.638-|Sample:5.34|
EPOCH[37/1000] loss0.613-|Sample:5.20|
EPOCH[38/1000] loss0.583-|Sample:5.55|
EPOCH[39/1000] loss0.560-|Sample:5.62|
EPOCH[40/1000] loss0.537-|Sample:5.19|
[TEST]
{'precision': array([0.00069496]), 'recall': array([0.00222251]), 'ndcg': array([0.00137102])}
EPOCH[41/1000] loss0.510-|Sample:5.72|
EPOCH[42/1000] loss0.491-|Sample:5.51|
EPOCH[43/1000] loss0.470-|Sample:5.12|
EPOCH[44/1000] loss0.449-|Sample:5.42|
EPOCH[45/1000] loss0.433-|Sample:5.42|
EPOCH[46/1000] loss0.413-|Sample:5.48|
EPOCH[47/1000] loss0.397-|Sample:5.70|
EPOCH[48/1000] loss0.381-|Sample:5.26|
EPOCH[49/1000] loss0.366-|Sample:5.19|
EPOCH[50/1000] loss0.350-|Sample:5.26|
[TEST]
{'precision': array([0.00129446]), 'recall': array([0.00387004]), 'ndcg': array([0.002371])}
EPOCH[51/1000] loss0.332-|Sample:5.44|
EPOCH[52/1000] loss0.323-|Sample:5.86|
EPOCH[53/1000] loss0.309-|Sample:5.17|
EPOCH[54/1000] loss0.297-|Sample:5.95|
EPOCH[55/1000] loss0.285-|Sample:5.65|
EPOCH[56/1000] loss0.275-|Sample:5.48|
EPOCH[57/1000] loss0.261-|Sample:5.40|
EPOCH[58/1000] loss0.254-|Sample:5.61|
EPOCH[59/1000] loss0.244-|Sample:5.45|
EPOCH[60/1000] loss0.234-|Sample:5.89|
[TEST]
{'precision': array([0.00232601]), 'recall': array([0.00619317]), 'ndcg': array([0.00405162])}
EPOCH[61/1000] loss0.227-|Sample:5.56|
EPOCH[62/1000] loss0.218-|Sample:5.08|
EPOCH[63/1000] loss0.209-|Sample:5.58|
EPOCH[64/1000] loss0.203-|Sample:5.81|
EPOCH[65/1000] loss0.195-|Sample:4.97|
EPOCH[66/1000] loss0.187-|Sample:4.95|
EPOCH[67/1000] loss0.180-|Sample:5.09|
EPOCH[68/1000] loss0.175-|Sample:5.20|
EPOCH[69/1000] loss0.170-|Sample:5.01|
EPOCH[70/1000] loss0.162-|Sample:5.62|
[TEST]
{'precision': array([0.0036975]), 'recall': array([0.0088954]), 'ndcg': array([0.00619472])}
EPOCH[71/1000] loss0.156-|Sample:5.59|
EPOCH[72/1000] loss0.151-|Sample:5.30|
EPOCH[73/1000] loss0.146-|Sample:5.48|
EPOCH[74/1000] loss0.142-|Sample:5.53|
EPOCH[75/1000] loss0.137-|Sample:5.16|
EPOCH[76/1000] loss0.133-|Sample:5.28|
EPOCH[77/1000] loss0.126-|Sample:5.48|
EPOCH[78/1000] loss0.125-|Sample:5.48|
EPOCH[79/1000] loss0.121-|Sample:5.58|
EPOCH[80/1000] loss0.117-|Sample:5.56|
[TEST]
{'precision': array([0.00511086]), 'recall': array([0.01128787]), 'ndcg': array([0.00821497])}
EPOCH[81/1000] loss0.112-|Sample:5.42|
EPOCH[82/1000] loss0.110-|Sample:5.01|
EPOCH[83/1000] loss0.107-|Sample:5.47|
EPOCH[84/1000] loss0.103-|Sample:5.40|
EPOCH[85/1000] loss0.101-|Sample:5.44|
EPOCH[86/1000] loss0.097-|Sample:5.36|
EPOCH[87/1000] loss0.095-|Sample:5.39|
EPOCH[88/1000] loss0.092-|Sample:5.40|
EPOCH[89/1000] loss0.090-|Sample:4.97|
EPOCH[90/1000] loss0.087-|Sample:5.37|
[TEST]
{'precision': array([0.00639695]), 'recall': array([0.01348208]), 'ndcg': array([0.01028852])}
EPOCH[91/1000] loss0.084-|Sample:5.33|
EPOCH[92/1000] loss0.082-|Sample:5.42|
EPOCH[93/1000] loss0.080-|Sample:5.45|
EPOCH[94/1000] loss0.078-|Sample:5.51|
EPOCH[95/1000] loss0.076-|Sample:5.48|
EPOCH[96/1000] loss0.074-|Sample:5.08|
EPOCH[97/1000] loss0.073-|Sample:5.59|
EPOCH[98/1000] loss0.070-|Sample:5.45|
EPOCH[99/1000] loss0.069-|Sample:5.58|
EPOCH[100/1000] loss0.066-|Sample:5.25|
[TEST]
{'precision': array([0.00750553]), 'recall': array([0.01542276]), 'ndcg': array([0.01192555])}
EPOCH[101/1000] loss0.065-|Sample:5.58|
EPOCH[102/1000] loss0.065-|Sample:5.45|
EPOCH[103/1000] loss0.062-|Sample:5.55|
EPOCH[104/1000] loss0.061-|Sample:5.37|
EPOCH[105/1000] loss0.059-|Sample:5.42|
EPOCH[106/1000] loss0.059-|Sample:5.39|
EPOCH[107/1000] loss0.057-|Sample:5.05|
EPOCH[108/1000] loss0.056-|Sample:5.37|
EPOCH[109/1000] loss0.055-|Sample:5.55|
EPOCH[110/1000] loss0.053-|Sample:5.47|
[TEST]
{'precision': array([0.00839976]), 'recall': array([0.01718211]), 'ndcg': array([0.01334478])}
EPOCH[111/1000] loss0.053-|Sample:5.53|
EPOCH[112/1000] loss0.051-|Sample:5.34|
EPOCH[113/1000] loss0.051-|Sample:5.55|
EPOCH[114/1000] loss0.049-|Sample:5.64|
EPOCH[115/1000] loss0.049-|Sample:5.33|
EPOCH[116/1000] loss0.047-|Sample:5.41|
EPOCH[117/1000] loss0.046-|Sample:5.26|
EPOCH[118/1000] loss0.046-|Sample:5.53|
EPOCH[119/1000] loss0.045-|Sample:5.19|
EPOCH[120/1000] loss0.045-|Sample:5.26|
[TEST]
{'precision': array([0.00934925]), 'recall': array([0.01902451]), 'ndcg': array([0.01486679])}
EPOCH[121/1000] loss0.043-|Sample:5.37|
EPOCH[122/1000] loss0.043-|Sample:5.48|
EPOCH[123/1000] loss0.042-|Sample:5.23|
EPOCH[124/1000] loss0.041-|Sample:5.50|
EPOCH[125/1000] loss0.041-|Sample:5.47|
EPOCH[126/1000] loss0.040-|Sample:5.33|
EPOCH[127/1000] loss0.039-|Sample:5.47|
EPOCH[128/1000] loss0.039-|Sample:5.64|
EPOCH[129/1000] loss0.038-|Sample:5.42|
EPOCH[130/1000] loss0.038-|Sample:5.37|
[TEST]
{'precision': array([0.01008272]), 'recall': array([0.0205122]), 'ndcg': array([0.01596699])}
EPOCH[131/1000] loss0.036-|Sample:5.55|
EPOCH[132/1000] loss0.035-|Sample:5.39|
EPOCH[133/1000] loss0.035-|Sample:5.59|
EPOCH[134/1000] loss0.035-|Sample:5.62|
EPOCH[135/1000] loss0.034-|Sample:5.45|
EPOCH[136/1000] loss0.034-|Sample:5.39|
EPOCH[137/1000] loss0.033-|Sample:5.09|
EPOCH[138/1000] loss0.033-|Sample:5.48|
EPOCH[139/1000] loss0.032-|Sample:5.36|
EPOCH[140/1000] loss0.032-|Sample:5.42|
[TEST]
{'precision': array([0.01070735]), 'recall': array([0.02190397]), 'ndcg': array([0.01701165])}
EPOCH[141/1000] loss0.032-|Sample:5.76|
EPOCH[142/1000] loss0.031-|Sample:5.59|
EPOCH[143/1000] loss0.031-|Sample:5.34|
EPOCH[144/1000] loss0.030-|Sample:4.97|
EPOCH[145/1000] loss0.030-|Sample:5.25|
EPOCH[146/1000] loss0.030-|Sample:5.45|
EPOCH[147/1000] loss0.030-|Sample:5.26|
EPOCH[148/1000] loss0.029-|Sample:5.64|
EPOCH[149/1000] loss0.029-|Sample:5.53|
EPOCH[150/1000] loss0.028-|Sample:5.56|
[TEST]
{'precision': array([0.01135039]), 'recall': array([0.02344129]), 'ndcg': array([0.01809336])}
EPOCH[151/1000] loss0.027-|Sample:5.56|
EPOCH[152/1000] loss0.027-|Sample:5.31|
EPOCH[153/1000] loss0.027-|Sample:5.50|
EPOCH[154/1000] loss0.027-|Sample:5.06|
EPOCH[155/1000] loss0.027-|Sample:5.31|
EPOCH[156/1000] loss0.026-|Sample:5.59|
EPOCH[157/1000] loss0.027-|Sample:5.20|
EPOCH[158/1000] loss0.026-|Sample:5.56|
EPOCH[159/1000] loss0.026-|Sample:5.28|
EPOCH[160/1000] loss0.025-|Sample:5.31|
[TEST]
{'precision': array([0.01190971]), 'recall': array([0.02485327]), 'ndcg': array([0.01916341])}
EPOCH[161/1000] loss0.025-|Sample:5.51|
EPOCH[162/1000] loss0.025-|Sample:5.31|
EPOCH[163/1000] loss0.024-|Sample:5.70|
EPOCH[164/1000] loss0.024-|Sample:5.06|
EPOCH[165/1000] loss0.024-|Sample:5.45|
EPOCH[166/1000] loss0.024-|Sample:5.30|
EPOCH[167/1000] loss0.023-|Sample:5.31|
EPOCH[168/1000] loss0.023-|Sample:5.76|
EPOCH[169/1000] loss0.022-|Sample:5.25|
EPOCH[170/1000] loss0.023-|Sample:5.36|
[TEST]
{'precision': array([0.01247572]), 'recall': array([0.02646195]), 'ndcg': array([0.02025839])}
EPOCH[171/1000] loss0.023-|Sample:5.37|
EPOCH[172/1000] loss0.022-|Sample:5.55|
EPOCH[173/1000] loss0.023-|Sample:5.55|
EPOCH[174/1000] loss0.022-|Sample:5.45|
EPOCH[175/1000] loss0.022-|Sample:5.23|
EPOCH[176/1000] loss0.022-|Sample:5.39|
EPOCH[177/1000] loss0.021-|Sample:5.48|
EPOCH[178/1000] loss0.021-|Sample:5.36|
EPOCH[179/1000] loss0.021-|Sample:5.50|
EPOCH[180/1000] loss0.021-|Sample:5.51|
[TEST]
{'precision': array([0.0129714]), 'recall': array([0.02779908]), 'ndcg': array([0.02141671])}
EPOCH[181/1000] loss0.021-|Sample:5.31|
EPOCH[182/1000] loss0.020-|Sample:5.25|
EPOCH[183/1000] loss0.020-|Sample:5.44|
EPOCH[184/1000] loss0.020-|Sample:5.67|
EPOCH[185/1000] loss0.021-|Sample:5.23|
EPOCH[186/1000] loss0.020-|Sample:5.53|
EPOCH[187/1000] loss0.020-|Sample:5.44|
EPOCH[188/1000] loss0.020-|Sample:5.39|
EPOCH[189/1000] loss0.019-|Sample:5.26|
EPOCH[190/1000] loss0.019-|Sample:5.39|
[TEST]
{'precision': array([0.01350894]), 'recall': array([0.02934047]), 'ndcg': array([0.02239834])}
EPOCH[191/1000] loss0.019-|Sample:5.51|
EPOCH[192/1000] loss0.019-|Sample:5.44|
EPOCH[193/1000] loss0.019-|Sample:5.37|
EPOCH[194/1000] loss0.019-|Sample:5.67|
EPOCH[195/1000] loss0.018-|Sample:5.50|
EPOCH[196/1000] loss0.019-|Sample:5.64|
EPOCH[197/1000] loss0.018-|Sample:5.34|
EPOCH[198/1000] loss0.018-|Sample:5.26|
EPOCH[199/1000] loss0.018-|Sample:5.05|
EPOCH[200/1000] loss0.018-|Sample:5.45|
[TEST]
{'precision': array([0.01395438]), 'recall': array([0.03079584]), 'ndcg': array([0.0234068])}
EPOCH[201/1000] loss0.018-|Sample:5.31|
EPOCH[202/1000] loss0.018-|Sample:5.64|
EPOCH[203/1000] loss0.017-|Sample:5.41|
EPOCH[204/1000] loss0.017-|Sample:5.30|
EPOCH[205/1000] loss0.018-|Sample:5.36|
EPOCH[206/1000] loss0.017-|Sample:5.41|
EPOCH[207/1000] loss0.017-|Sample:4.98|
EPOCH[208/1000] loss0.017-|Sample:5.62|
EPOCH[209/1000] loss0.017-|Sample:5.41|
EPOCH[210/1000] loss0.017-|Sample:5.33|
[TEST]
{'precision': array([0.01451035]), 'recall': array([0.03298011]), 'ndcg': array([0.02459524])}
EPOCH[211/1000] loss0.017-|Sample:5.59|
EPOCH[212/1000] loss0.017-|Sample:5.30|
EPOCH[213/1000] loss0.016-|Sample:5.59|
EPOCH[214/1000] loss0.016-|Sample:5.37|
EPOCH[215/1000] loss0.016-|Sample:5.51|
EPOCH[216/1000] loss0.016-|Sample:5.48|
EPOCH[217/1000] loss0.016-|Sample:5.28|
EPOCH[218/1000] loss0.016-|Sample:5.26|
EPOCH[219/1000] loss0.016-|Sample:5.37|
EPOCH[220/1000] loss0.016-|Sample:5.53|
[TEST]
{'precision': array([0.01511823]), 'recall': array([0.03502476]), 'ndcg': array([0.02595442])}
EPOCH[221/1000] loss0.016-|Sample:5.50|
EPOCH[222/1000] loss0.016-|Sample:5.51|
EPOCH[223/1000] loss0.016-|Sample:5.22|
EPOCH[224/1000] loss0.016-|Sample:5.19|
EPOCH[225/1000] loss0.016-|Sample:5.42|
EPOCH[226/1000] loss0.015-|Sample:5.47|
EPOCH[227/1000] loss0.016-|Sample:5.36|
EPOCH[228/1000] loss0.015-|Sample:5.51|
EPOCH[229/1000] loss0.015-|Sample:5.42|
EPOCH[230/1000] loss0.015-|Sample:5.48|
[TEST]
{'precision': array([0.01561223]), 'recall': array([0.03698892]), 'ndcg': array([0.02758954])}
EPOCH[231/1000] loss0.015-|Sample:5.51|
EPOCH[232/1000] loss0.015-|Sample:5.40|
EPOCH[233/1000] loss0.015-|Sample:5.73|
EPOCH[234/1000] loss0.015-|Sample:5.20|
EPOCH[235/1000] loss0.015-|Sample:5.11|
EPOCH[236/1000] loss0.015-|Sample:5.22|
EPOCH[237/1000] loss0.015-|Sample:5.31|
EPOCH[238/1000] loss0.014-|Sample:5.19|
EPOCH[239/1000] loss0.014-|Sample:5.53|
EPOCH[240/1000] loss0.014-|Sample:5.37|
[TEST]
{'precision': array([0.01620001]), 'recall': array([0.03896507]), 'ndcg': array([0.02906943])}
EPOCH[241/1000] loss0.014-|Sample:5.67|
EPOCH[242/1000] loss0.014-|Sample:5.50|
EPOCH[243/1000] loss0.014-|Sample:4.89|
EPOCH[244/1000] loss0.014-|Sample:5.33|
EPOCH[245/1000] loss0.014-|Sample:5.01|
EPOCH[246/1000] loss0.014-|Sample:5.59|
EPOCH[247/1000] loss0.014-|Sample:5.73|
EPOCH[248/1000] loss0.014-|Sample:5.36|
EPOCH[249/1000] loss0.014-|Sample:5.34|
EPOCH[250/1000] loss0.014-|Sample:5.19|
[TEST]
{'precision': array([0.01676435]), 'recall': array([0.04143729]), 'ndcg': array([0.03077025])}
EPOCH[251/1000] loss0.013-|Sample:5.86|
EPOCH[252/1000] loss0.013-|Sample:5.30|
EPOCH[253/1000] loss0.013-|Sample:5.58|
EPOCH[254/1000] loss0.013-|Sample:5.09|
EPOCH[255/1000] loss0.013-|Sample:5.97|
EPOCH[256/1000] loss0.014-|Sample:5.53|
EPOCH[257/1000] loss0.013-|Sample:5.20|
EPOCH[258/1000] loss0.013-|Sample:5.31|
EPOCH[259/1000] loss0.013-|Sample:5.36|
EPOCH[260/1000] loss0.013-|Sample:5.26|
[TEST]
{'precision': array([0.0171696]), 'recall': array([0.043488]), 'ndcg': array([0.03228115])}
EPOCH[261/1000] loss0.013-|Sample:5.65|
EPOCH[262/1000] loss0.013-|Sample:5.55|
EPOCH[263/1000] loss0.012-|Sample:5.12|
EPOCH[264/1000] loss0.013-|Sample:5.26|
EPOCH[265/1000] loss0.013-|Sample:5.14|
EPOCH[266/1000] loss0.013-|Sample:5.12|
EPOCH[267/1000] loss0.013-|Sample:5.17|
EPOCH[268/1000] loss0.012-|Sample:5.17|
EPOCH[269/1000] loss0.012-|Sample:6.33|
EPOCH[270/1000] loss0.012-|Sample:5.26|
[TEST]
{'precision': array([0.01757151]), 'recall': array([0.04523327]), 'ndcg': array([0.03376131])}
EPOCH[271/1000] loss0.012-|Sample:5.22|
EPOCH[272/1000] loss0.012-|Sample:5.08|
EPOCH[273/1000] loss0.012-|Sample:5.69|
EPOCH[274/1000] loss0.012-|Sample:5.61|
EPOCH[275/1000] loss0.012-|Sample:5.33|
EPOCH[276/1000] loss0.012-|Sample:5.70|
EPOCH[277/1000] loss0.012-|Sample:5.34|
EPOCH[278/1000] loss0.012-|Sample:5.31|
EPOCH[279/1000] loss0.012-|Sample:5.05|
EPOCH[280/1000] loss0.012-|Sample:5.09|
[TEST]
{'precision': array([0.01826646]), 'recall': array([0.04821141]), 'ndcg': array([0.03613185])}
EPOCH[281/1000] loss0.012-|Sample:5.87|
EPOCH[282/1000] loss0.012-|Sample:6.01|
EPOCH[283/1000] loss0.012-|Sample:5.70|
EPOCH[284/1000] loss0.012-|Sample:5.51|
EPOCH[285/1000] loss0.011-|Sample:5.59|
EPOCH[286/1000] loss0.012-|Sample:5.72|
EPOCH[287/1000] loss0.012-|Sample:5.70|
EPOCH[288/1000] loss0.012-|Sample:5.55|
EPOCH[289/1000] loss0.011-|Sample:5.87|
EPOCH[290/1000] loss0.012-|Sample:5.86|
[TEST]
{'precision': array([0.01886764]), 'recall': array([0.05055409]), 'ndcg': array([0.03798287])}
EPOCH[291/1000] loss0.011-|Sample:5.87|
EPOCH[292/1000] loss0.011-|Sample:5.61|
EPOCH[293/1000] loss0.011-|Sample:5.53|
EPOCH[294/1000] loss0.011-|Sample:5.69|
EPOCH[295/1000] loss0.011-|Sample:5.75|
EPOCH[296/1000] loss0.011-|Sample:5.61|
EPOCH[297/1000] loss0.011-|Sample:5.89|
EPOCH[298/1000] loss0.011-|Sample:5.53|
EPOCH[299/1000] loss0.011-|Sample:5.92|
EPOCH[300/1000] loss0.011-|Sample:5.64|
[TEST]
{'precision': array([0.01937169]), 'recall': array([0.05290859]), 'ndcg': array([0.04014456])}
EPOCH[301/1000] loss0.011-|Sample:5.56|
EPOCH[302/1000] loss0.011-|Sample:5.42|
EPOCH[303/1000] loss0.011-|Sample:5.48|
EPOCH[304/1000] loss0.011-|Sample:5.64|
EPOCH[305/1000] loss0.011-|Sample:5.84|
EPOCH[306/1000] loss0.011-|Sample:5.89|
EPOCH[307/1000] loss0.011-|Sample:5.84|
EPOCH[308/1000] loss0.011-|Sample:5.62|
EPOCH[309/1000] loss0.011-|Sample:5.78|
EPOCH[310/1000] loss0.011-|Sample:5.64|
[TEST]
{'precision': array([0.01999297]), 'recall': array([0.05596266]), 'ndcg': array([0.04195801])}
EPOCH[311/1000] loss0.011-|Sample:5.92|
EPOCH[312/1000] loss0.011-|Sample:4.94|
EPOCH[313/1000] loss0.010-|Sample:4.92|
EPOCH[314/1000] loss0.010-|Sample:4.75|
EPOCH[315/1000] loss0.010-|Sample:4.69|
EPOCH[316/1000] loss0.010-|Sample:4.97|
EPOCH[317/1000] loss0.010-|Sample:4.83|
EPOCH[318/1000] loss0.010-|Sample:4.76|
EPOCH[319/1000] loss0.010-|Sample:4.83|
EPOCH[320/1000] loss0.010-|Sample:4.94|
[TEST]
{'precision': array([0.02064606]), 'recall': array([0.05899943]), 'ndcg': array([0.04416294])}
EPOCH[321/1000] loss0.010-|Sample:4.91|
EPOCH[322/1000] loss0.010-|Sample:4.81|
EPOCH[323/1000] loss0.010-|Sample:4.78|
EPOCH[324/1000] loss0.010-|Sample:4.83|
EPOCH[325/1000] loss0.010-|Sample:5.03|
EPOCH[326/1000] loss0.010-|Sample:4.78|
EPOCH[327/1000] loss0.010-|Sample:4.70|
EPOCH[328/1000] loss0.010-|Sample:4.91|
EPOCH[329/1000] loss0.010-|Sample:4.64|
EPOCH[330/1000] loss0.010-|Sample:5.14|
[TEST]
{'precision': array([0.02135106]), 'recall': array([0.06228021]), 'ndcg': array([0.0463666])}
EPOCH[331/1000] loss0.010-|Sample:4.66|
EPOCH[332/1000] loss0.010-|Sample:4.76|
EPOCH[333/1000] loss0.010-|Sample:4.80|
EPOCH[334/1000] loss0.010-|Sample:4.62|
EPOCH[335/1000] loss0.010-|Sample:5.11|
EPOCH[336/1000] loss0.010-|Sample:4.81|
EPOCH[337/1000] loss0.010-|Sample:4.75|
EPOCH[338/1000] loss0.010-|Sample:4.67|
EPOCH[339/1000] loss0.010-|Sample:4.92|
EPOCH[340/1000] loss0.010-|Sample:4.83|
[TEST]
{'precision': array([0.02185511]), 'recall': array([0.06479589]), 'ndcg': array([0.04816018])}
EPOCH[341/1000] loss0.009-|Sample:4.89|
EPOCH[342/1000] loss0.010-|Sample:4.69|
EPOCH[343/1000] loss0.010-|Sample:4.69|
EPOCH[344/1000] loss0.009-|Sample:4.87|
EPOCH[345/1000] loss0.010-|Sample:4.64|
EPOCH[346/1000] loss0.009-|Sample:4.76|
EPOCH[347/1000] loss0.009-|Sample:4.87|
EPOCH[348/1000] loss0.009-|Sample:4.67|
EPOCH[349/1000] loss0.009-|Sample:4.89|
EPOCH[350/1000] loss0.009-|Sample:5.09|
[TEST]
{'precision': array([0.0224362]), 'recall': array([0.0675353]), 'ndcg': array([0.05014294])}
EPOCH[351/1000] loss0.009-|Sample:4.98|
EPOCH[352/1000] loss0.009-|Sample:4.59|
EPOCH[353/1000] loss0.009-|Sample:4.87|
EPOCH[354/1000] loss0.009-|Sample:4.56|
EPOCH[355/1000] loss0.009-|Sample:4.89|
EPOCH[356/1000] loss0.009-|Sample:4.75|
EPOCH[357/1000] loss0.009-|Sample:4.83|
EPOCH[358/1000] loss0.009-|Sample:4.89|
EPOCH[359/1000] loss0.009-|Sample:4.78|
EPOCH[360/1000] loss0.009-|Sample:4.72|
[TEST]
{'precision': array([0.02302733]), 'recall': array([0.07017675]), 'ndcg': array([0.05231093])}
EPOCH[361/1000] loss0.009-|Sample:4.66|
EPOCH[362/1000] loss0.009-|Sample:4.70|
EPOCH[363/1000] loss0.009-|Sample:4.87|
EPOCH[364/1000] loss0.009-|Sample:4.64|
EPOCH[365/1000] loss0.009-|Sample:4.91|
EPOCH[366/1000] loss0.009-|Sample:5.09|
EPOCH[367/1000] loss0.009-|Sample:4.83|
EPOCH[368/1000] loss0.009-|Sample:4.62|
EPOCH[369/1000] loss0.009-|Sample:4.89|
EPOCH[370/1000] loss0.009-|Sample:5.62|
[TEST]
{'precision': array([0.02358832]), 'recall': array([0.07277528]), 'ndcg': array([0.05467976])}
EPOCH[371/1000] loss0.009-|Sample:4.81|
EPOCH[372/1000] loss0.009-|Sample:4.81|
EPOCH[373/1000] loss0.009-|Sample:4.64|
EPOCH[374/1000] loss0.009-|Sample:5.48|
EPOCH[375/1000] loss0.009-|Sample:4.83|
EPOCH[376/1000] loss0.009-|Sample:4.66|
EPOCH[377/1000] loss0.009-|Sample:4.87|
EPOCH[378/1000] loss0.009-|Sample:4.78|
EPOCH[379/1000] loss0.009-|Sample:4.67|
EPOCH[380/1000] loss0.008-|Sample:4.87|
[TEST]
{'precision': array([0.02421462]), 'recall': array([0.07519862]), 'ndcg': array([0.0566])}
EPOCH[381/1000] loss0.009-|Sample:4.78|
EPOCH[382/1000] loss0.009-|Sample:4.66|
EPOCH[383/1000] loss0.009-|Sample:4.91|
EPOCH[384/1000] loss0.008-|Sample:4.69|
EPOCH[385/1000] loss0.008-|Sample:4.81|
EPOCH[386/1000] loss0.008-|Sample:5.81|
EPOCH[387/1000] loss0.008-|Sample:4.76|
EPOCH[388/1000] loss0.008-|Sample:4.89|
EPOCH[389/1000] loss0.008-|Sample:5.56|
EPOCH[390/1000] loss0.008-|Sample:4.76|
[TEST]
{'precision': array([0.02465168]), 'recall': array([0.07754746]), 'ndcg': array([0.05843726])}
EPOCH[391/1000] loss0.009-|Sample:4.89|
EPOCH[392/1000] loss0.009-|Sample:4.72|
EPOCH[393/1000] loss0.008-|Sample:4.69|
EPOCH[394/1000] loss0.008-|Sample:4.89|
EPOCH[395/1000] loss0.008-|Sample:4.61|
EPOCH[396/1000] loss0.008-|Sample:5.41|
EPOCH[397/1000] loss0.008-|Sample:4.66|
EPOCH[398/1000] loss0.008-|Sample:4.89|
EPOCH[399/1000] loss0.008-|Sample:4.76|
EPOCH[400/1000] loss0.008-|Sample:4.70|
[TEST]
{'precision': array([0.02532822]), 'recall': array([0.0807678]), 'ndcg': array([0.06063175])}
EPOCH[401/1000] loss0.008-|Sample:4.64|
EPOCH[402/1000] loss0.008-|Sample:5.67|
EPOCH[403/1000] loss0.008-|Sample:4.95|
EPOCH[404/1000] loss0.008-|Sample:4.62|
EPOCH[405/1000] loss0.008-|Sample:4.80|
EPOCH[406/1000] loss0.008-|Sample:4.80|
EPOCH[407/1000] loss0.008-|Sample:4.67|
EPOCH[408/1000] loss0.008-|Sample:5.33|
EPOCH[409/1000] loss0.008-|Sample:4.94|
EPOCH[410/1000] loss0.008-|Sample:4.61|
[TEST]
{'precision': array([0.02563802]), 'recall': array([0.0819798]), 'ndcg': array([0.06189011])}
EPOCH[411/1000] loss0.008-|Sample:4.78|
EPOCH[412/1000] loss0.008-|Sample:4.76|
EPOCH[413/1000] loss0.008-|Sample:4.69|
EPOCH[414/1000] loss0.008-|Sample:4.84|
EPOCH[415/1000] loss0.008-|Sample:5.34|
EPOCH[416/1000] loss0.008-|Sample:4.69|
EPOCH[417/1000] loss0.008-|Sample:5.47|
EPOCH[418/1000] loss0.008-|Sample:5.48|
EPOCH[419/1000] loss0.008-|Sample:4.69|
EPOCH[420/1000] loss0.008-|Sample:5.00|
[TEST]
{'precision': array([0.02644015]), 'recall': array([0.08497008]), 'ndcg': array([0.06424189])}
EPOCH[421/1000] loss0.008-|Sample:4.78|
EPOCH[422/1000] loss0.008-|Sample:5.22|
EPOCH[423/1000] loss0.008-|Sample:4.83|
EPOCH[424/1000] loss0.008-|Sample:4.69|
EPOCH[425/1000] loss0.008-|Sample:4.95|
EPOCH[426/1000] loss0.008-|Sample:4.70|
EPOCH[427/1000] loss0.008-|Sample:5.34|
EPOCH[428/1000] loss0.008-|Sample:4.72|
EPOCH[429/1000] loss0.008-|Sample:5.00|
EPOCH[430/1000] loss0.008-|Sample:4.84|
[TEST]
{'precision': array([0.02679684]), 'recall': array([0.08698336]), 'ndcg': array([0.06540117])}
EPOCH[431/1000] loss0.008-|Sample:5.50|
EPOCH[432/1000] loss0.008-|Sample:4.84|
EPOCH[433/1000] loss0.008-|Sample:4.67|
EPOCH[434/1000] loss0.007-|Sample:5.61|
EPOCH[435/1000] loss0.008-|Sample:4.83|
EPOCH[436/1000] loss0.008-|Sample:4.69|
EPOCH[437/1000] loss0.007-|Sample:4.84|
EPOCH[438/1000] loss0.007-|Sample:4.86|
EPOCH[439/1000] loss0.008-|Sample:4.72|
EPOCH[440/1000] loss0.008-|Sample:4.87|
[TEST]
{'precision': array([0.02700449]), 'recall': array([0.08837072]), 'ndcg': array([0.06633225])}
EPOCH[441/1000] loss0.007-|Sample:4.83|
EPOCH[442/1000] loss0.007-|Sample:4.73|
EPOCH[443/1000] loss0.007-|Sample:5.26|
EPOCH[444/1000] loss0.007-|Sample:5.31|
EPOCH[445/1000] loss0.007-|Sample:4.64|
EPOCH[446/1000] loss0.007-|Sample:5.06|
EPOCH[447/1000] loss0.007-|Sample:4.78|
EPOCH[448/1000] loss0.007-|Sample:4.70|
EPOCH[449/1000] loss0.007-|Sample:4.89|
EPOCH[450/1000] loss0.007-|Sample:4.80|
[TEST]
{'precision': array([0.02732601]), 'recall': array([0.08971765]), 'ndcg': array([0.06733873])}
EPOCH[451/1000] loss0.007-|Sample:4.91|
EPOCH[452/1000] loss0.007-|Sample:4.59|
EPOCH[453/1000] loss0.007-|Sample:4.87|
EPOCH[454/1000] loss0.007-|Sample:5.00|
EPOCH[455/1000] loss0.007-|Sample:4.73|
EPOCH[456/1000] loss0.007-|Sample:4.64|
EPOCH[457/1000] loss0.007-|Sample:5.14|
EPOCH[458/1000] loss0.007-|Sample:4.91|
EPOCH[459/1000] loss0.007-|Sample:4.67|
EPOCH[460/1000] loss0.007-|Sample:5.12|
[TEST]
{'precision': array([0.02779825]), 'recall': array([0.09135495]), 'ndcg': array([0.06896972])}
EPOCH[461/1000] loss0.007-|Sample:4.69|
EPOCH[462/1000] loss0.007-|Sample:4.87|
EPOCH[463/1000] loss0.007-|Sample:4.84|
EPOCH[464/1000] loss0.007-|Sample:4.62|
EPOCH[465/1000] loss0.007-|Sample:4.94|
EPOCH[466/1000] loss0.007-|Sample:4.76|
EPOCH[467/1000] loss0.007-|Sample:4.78|
EPOCH[468/1000] loss0.007-|Sample:4.86|
EPOCH[469/1000] loss0.007-|Sample:4.73|
EPOCH[470/1000] loss0.007-|Sample:4.87|
[TEST]
{'precision': array([0.02821689]), 'recall': array([0.09290416]), 'ndcg': array([0.07022351])}
EPOCH[471/1000] loss0.007-|Sample:5.31|
EPOCH[472/1000] loss0.007-|Sample:4.80|
EPOCH[473/1000] loss0.007-|Sample:4.69|
EPOCH[474/1000] loss0.007-|Sample:4.80|
EPOCH[475/1000] loss0.007-|Sample:4.66|
EPOCH[476/1000] loss0.007-|Sample:5.28|
EPOCH[477/1000] loss0.007-|Sample:4.89|
EPOCH[478/1000] loss0.007-|Sample:4.70|
EPOCH[479/1000] loss0.007-|Sample:5.14|
EPOCH[480/1000] loss0.007-|Sample:4.95|
[TEST]
{'precision': array([0.02881472]), 'recall': array([0.09558373]), 'ndcg': array([0.07225996])}
EPOCH[481/1000] loss0.007-|Sample:4.92|
EPOCH[482/1000] loss0.007-|Sample:4.83|
EPOCH[483/1000] loss0.007-|Sample:4.69|
EPOCH[484/1000] loss0.007-|Sample:4.86|
EPOCH[485/1000] loss0.007-|Sample:4.69|
EPOCH[486/1000] loss0.007-|Sample:5.80|
EPOCH[487/1000] loss0.007-|Sample:4.64|
EPOCH[488/1000] loss0.007-|Sample:4.80|
EPOCH[489/1000] loss0.007-|Sample:4.86|
EPOCH[490/1000] loss0.007-|Sample:4.67|
[TEST]
{'precision': array([0.02914797]), 'recall': array([0.09730694]), 'ndcg': array([0.07403128])}
EPOCH[491/1000] loss0.007-|Sample:4.89|
EPOCH[492/1000] loss0.007-|Sample:4.67|
EPOCH[493/1000] loss0.007-|Sample:4.81|
EPOCH[494/1000] loss0.007-|Sample:5.20|
EPOCH[495/1000] loss0.007-|Sample:4.67|
EPOCH[496/1000] loss0.007-|Sample:5.00|
EPOCH[497/1000] loss0.007-|Sample:4.86|
EPOCH[498/1000] loss0.007-|Sample:4.66|
EPOCH[499/1000] loss0.007-|Sample:5.11|
EPOCH[500/1000] loss0.007-|Sample:4.66|
[TEST]
{'precision': array([0.02957834]), 'recall': array([0.09907141]), 'ndcg': array([0.07466749])}
EPOCH[501/1000] loss0.007-|Sample:4.66|
EPOCH[502/1000] loss0.007-|Sample:4.83|
EPOCH[503/1000] loss0.007-|Sample:4.91|
EPOCH[504/1000] loss0.007-|Sample:4.62|
EPOCH[505/1000] loss0.007-|Sample:4.84|
EPOCH[506/1000] loss0.007-|Sample:4.78|
EPOCH[507/1000] loss0.007-|Sample:4.70|
EPOCH[508/1000] loss0.007-|Sample:5.34|
EPOCH[509/1000] loss0.007-|Sample:5.03|
EPOCH[510/1000] loss0.007-|Sample:4.59|
[TEST]
{'precision': array([0.02983288]), 'recall': array([0.09962064]), 'ndcg': array([0.07566131])}
EPOCH[511/1000] loss0.007-|Sample:4.66|
EPOCH[512/1000] loss0.007-|Sample:4.69|
EPOCH[513/1000] loss0.007-|Sample:4.87|
EPOCH[514/1000] loss0.006-|Sample:4.70|
EPOCH[515/1000] loss0.007-|Sample:4.66|
EPOCH[516/1000] loss0.007-|Sample:4.66|
EPOCH[517/1000] loss0.007-|Sample:4.89|
EPOCH[518/1000] loss0.007-|Sample:4.67|
EPOCH[519/1000] loss0.007-|Sample:5.01|
EPOCH[520/1000] loss0.007-|Sample:5.45|
[TEST]
{'precision': array([0.03050774]), 'recall': array([0.10199919]), 'ndcg': array([0.07724852])}
EPOCH[521/1000] loss0.006-|Sample:5.30|
EPOCH[522/1000] loss0.007-|Sample:4.84|
EPOCH[523/1000] loss0.007-|Sample:4.66|
EPOCH[524/1000] loss0.006-|Sample:4.72|
EPOCH[525/1000] loss0.007-|Sample:5.61|
EPOCH[526/1000] loss0.007-|Sample:4.70|
EPOCH[527/1000] loss0.007-|Sample:4.75|
EPOCH[528/1000] loss0.006-|Sample:5.42|
EPOCH[529/1000] loss0.007-|Sample:4.72|
EPOCH[530/1000] loss0.006-|Sample:4.92|
[TEST]
{'precision': array([0.03080247]), 'recall': array([0.10323229]), 'ndcg': array([0.07823698])}
EPOCH[531/1000] loss0.007-|Sample:4.83|
EPOCH[532/1000] loss0.006-|Sample:4.64|
EPOCH[533/1000] loss0.006-|Sample:4.76|
EPOCH[534/1000] loss0.006-|Sample:4.84|
EPOCH[535/1000] loss0.006-|Sample:4.66|
EPOCH[536/1000] loss0.006-|Sample:5.64|
EPOCH[537/1000] loss0.006-|Sample:5.44|
EPOCH[538/1000] loss0.006-|Sample:4.83|
EPOCH[539/1000] loss0.006-|Sample:4.92|
EPOCH[540/1000] loss0.006-|Sample:5.16|
[TEST]
{'precision': array([0.03102519]), 'recall': array([0.10419846]), 'ndcg': array([0.07988524])}
EPOCH[541/1000] loss0.006-|Sample:4.73|
EPOCH[542/1000] loss0.006-|Sample:4.94|
EPOCH[543/1000] loss0.006-|Sample:4.67|
EPOCH[544/1000] loss0.006-|Sample:5.01|
EPOCH[545/1000] loss0.006-|Sample:4.64|
EPOCH[546/1000] loss0.006-|Sample:4.87|
EPOCH[547/1000] loss0.006-|Sample:4.81|
EPOCH[548/1000] loss0.006-|Sample:4.66|
EPOCH[549/1000] loss0.006-|Sample:5.11|
EPOCH[550/1000] loss0.006-|Sample:4.67|
[TEST]
{'precision': array([0.0311893]), 'recall': array([0.1045356]), 'ndcg': array([0.0801354])}
EPOCH[551/1000] loss0.006-|Sample:4.86|
EPOCH[552/1000] loss0.006-|Sample:4.61|
EPOCH[553/1000] loss0.006-|Sample:5.44|
EPOCH[554/1000] loss0.006-|Sample:4.86|
EPOCH[555/1000] loss0.006-|Sample:4.70|
EPOCH[556/1000] loss0.006-|Sample:4.76|
EPOCH[557/1000] loss0.006-|Sample:4.81|
EPOCH[558/1000] loss0.006-|Sample:4.78|
EPOCH[559/1000] loss0.006-|Sample:4.64|
EPOCH[560/1000] loss0.006-|Sample:4.73|
[TEST]
{'precision': array([0.03181392]), 'recall': array([0.10698884]), 'ndcg': array([0.08181912])}
EPOCH[561/1000] loss0.006-|Sample:4.67|
EPOCH[562/1000] loss0.006-|Sample:5.11|
EPOCH[563/1000] loss0.006-|Sample:4.83|
EPOCH[564/1000] loss0.006-|Sample:4.69|
EPOCH[565/1000] loss0.006-|Sample:4.95|
EPOCH[566/1000] loss0.006-|Sample:4.66|
EPOCH[567/1000] loss0.006-|Sample:4.81|
EPOCH[568/1000] loss0.006-|Sample:5.08|
EPOCH[569/1000] loss0.006-|Sample:4.62|
EPOCH[570/1000] loss0.006-|Sample:4.75|
[TEST]
{'precision': array([0.031901]), 'recall': array([0.1074092]), 'ndcg': array([0.08234098])}
EPOCH[571/1000] loss0.006-|Sample:4.61|
EPOCH[572/1000] loss0.006-|Sample:4.89|
EPOCH[573/1000] loss0.006-|Sample:4.70|
EPOCH[574/1000] loss0.006-|Sample:4.94|
EPOCH[575/1000] loss0.006-|Sample:4.67|
EPOCH[576/1000] loss0.006-|Sample:5.47|
EPOCH[577/1000] loss0.006-|Sample:4.89|
EPOCH[578/1000] loss0.006-|Sample:4.75|
EPOCH[579/1000] loss0.006-|Sample:4.73|
EPOCH[580/1000] loss0.006-|Sample:5.50|
[TEST]
{'precision': array([0.03241175]), 'recall': array([0.10898764]), 'ndcg': array([0.08299057])}
EPOCH[581/1000] loss0.006-|Sample:4.86|
EPOCH[582/1000] loss0.006-|Sample:4.75|
EPOCH[583/1000] loss0.006-|Sample:4.67|
EPOCH[584/1000] loss0.006-|Sample:5.31|
EPOCH[585/1000] loss0.006-|Sample:4.72|
EPOCH[586/1000] loss0.006-|Sample:4.73|
EPOCH[587/1000] loss0.006-|Sample:4.92|
EPOCH[588/1000] loss0.006-|Sample:4.78|
EPOCH[589/1000] loss0.006-|Sample:4.78|
EPOCH[590/1000] loss0.006-|Sample:4.73|
[TEST]
{'precision': array([0.03260935]), 'recall': array([0.11001934]), 'ndcg': array([0.08387553])}
EPOCH[591/1000] loss0.006-|Sample:4.67|
EPOCH[592/1000] loss0.006-|Sample:4.78|
EPOCH[593/1000] loss0.006-|Sample:5.06|
EPOCH[594/1000] loss0.006-|Sample:4.70|
EPOCH[595/1000] loss0.006-|Sample:4.75|
EPOCH[596/1000] loss0.006-|Sample:4.87|
EPOCH[597/1000] loss0.006-|Sample:4.70|
EPOCH[598/1000] loss0.006-|Sample:5.56|
EPOCH[599/1000] loss0.006-|Sample:4.89|
EPOCH[600/1000] loss0.006-|Sample:4.76|
[TEST]
{'precision': array([0.03277011]), 'recall': array([0.11040592]), 'ndcg': array([0.08455438])}
EPOCH[601/1000] loss0.006-|Sample:4.70|
EPOCH[602/1000] loss0.006-|Sample:4.75|
EPOCH[603/1000] loss0.006-|Sample:4.70|
EPOCH[604/1000] loss0.006-|Sample:4.87|
EPOCH[605/1000] loss0.006-|Sample:4.94|
EPOCH[606/1000] loss0.006-|Sample:4.69|
EPOCH[607/1000] loss0.006-|Sample:5.72|
EPOCH[608/1000] loss0.006-|Sample:4.76|
EPOCH[609/1000] loss0.006-|Sample:4.70|
EPOCH[610/1000] loss0.006-|Sample:5.45|
[TEST]
{'precision': array([0.03320216]), 'recall': array([0.11220941]), 'ndcg': array([0.08618788])}
EPOCH[611/1000] loss0.006-|Sample:4.66|
EPOCH[612/1000] loss0.006-|Sample:4.76|
EPOCH[613/1000] loss0.006-|Sample:4.69|
EPOCH[614/1000] loss0.006-|Sample:4.81|
EPOCH[615/1000] loss0.006-|Sample:5.62|
EPOCH[616/1000] loss0.006-|Sample:4.70|
EPOCH[617/1000] loss0.006-|Sample:4.86|
EPOCH[618/1000] loss0.006-|Sample:4.67|
EPOCH[619/1000] loss0.006-|Sample:4.86|
EPOCH[620/1000] loss0.006-|Sample:4.81|
[TEST]
{'precision': array([0.03365597]), 'recall': array([0.11379755]), 'ndcg': array([0.08689315])}
EPOCH[621/1000] loss0.006-|Sample:5.81|
EPOCH[622/1000] loss0.006-|Sample:4.83|
EPOCH[623/1000] loss0.006-|Sample:4.67|
EPOCH[624/1000] loss0.006-|Sample:4.91|
EPOCH[625/1000] loss0.006-|Sample:4.75|
EPOCH[626/1000] loss0.006-|Sample:4.67|
EPOCH[627/1000] loss0.006-|Sample:4.87|
EPOCH[628/1000] loss0.006-|Sample:4.80|
EPOCH[629/1000] loss0.006-|Sample:4.67|
EPOCH[630/1000] loss0.006-|Sample:5.89|
[TEST]
{'precision': array([0.03371626]), 'recall': array([0.11398891]), 'ndcg': array([0.08753047])}
EPOCH[631/1000] loss0.006-|Sample:4.69|
EPOCH[632/1000] loss0.006-|Sample:4.69|
EPOCH[633/1000] loss0.006-|Sample:4.89|
EPOCH[634/1000] loss0.006-|Sample:4.72|
EPOCH[635/1000] loss0.006-|Sample:4.72|
EPOCH[636/1000] loss0.006-|Sample:5.20|
EPOCH[637/1000] loss0.006-|Sample:4.84|
EPOCH[638/1000] loss0.006-|Sample:4.83|
EPOCH[639/1000] loss0.006-|Sample:5.30|
EPOCH[640/1000] loss0.006-|Sample:4.73|
[TEST]
{'precision': array([0.03389041]), 'recall': array([0.11498795]), 'ndcg': array([0.08787988])}
EPOCH[641/1000] loss0.006-|Sample:4.86|
EPOCH[642/1000] loss0.006-|Sample:4.64|
EPOCH[643/1000] loss0.006-|Sample:4.76|
EPOCH[644/1000] loss0.006-|Sample:5.55|
EPOCH[645/1000] loss0.006-|Sample:4.62|
EPOCH[646/1000] loss0.006-|Sample:4.87|
EPOCH[647/1000] loss0.006-|Sample:4.70|
EPOCH[648/1000] loss0.006-|Sample:5.50|
EPOCH[649/1000] loss0.006-|Sample:4.64|
EPOCH[650/1000] loss0.006-|Sample:4.80|
[TEST]
{'precision': array([0.03426385]), 'recall': array([0.1160717]), 'ndcg': array([0.08939973])}
EPOCH[651/1000] loss0.006-|Sample:4.72|
EPOCH[652/1000] loss0.006-|Sample:4.86|
EPOCH[653/1000] loss0.006-|Sample:4.76|
EPOCH[654/1000] loss0.006-|Sample:4.80|
EPOCH[655/1000] loss0.006-|Sample:4.89|
EPOCH[656/1000] loss0.006-|Sample:4.66|
EPOCH[657/1000] loss0.006-|Sample:4.73|
EPOCH[658/1000] loss0.006-|Sample:4.86|
EPOCH[659/1000] loss0.006-|Sample:4.70|
EPOCH[660/1000] loss0.006-|Sample:4.89|
[TEST]
{'precision': array([0.03448992]), 'recall': array([0.11705194]), 'ndcg': array([0.09001902])}
EPOCH[661/1000] loss0.006-|Sample:4.86|
EPOCH[662/1000] loss0.006-|Sample:4.62|
EPOCH[663/1000] loss0.006-|Sample:5.09|
EPOCH[664/1000] loss0.006-|Sample:4.80|
EPOCH[665/1000] loss0.006-|Sample:4.69|
EPOCH[666/1000] loss0.006-|Sample:4.87|
EPOCH[667/1000] loss0.006-|Sample:4.78|
EPOCH[668/1000] loss0.006-|Sample:4.66|
EPOCH[669/1000] loss0.006-|Sample:4.84|
EPOCH[670/1000] loss0.006-|Sample:4.84|
[TEST]
{'precision': array([0.03472604]), 'recall': array([0.1179346]), 'ndcg': array([0.09071301])}
EPOCH[671/1000] loss0.006-|Sample:5.11|
EPOCH[672/1000] loss0.006-|Sample:4.76|
EPOCH[673/1000] loss0.006-|Sample:4.69|
EPOCH[674/1000] loss0.006-|Sample:5.03|
EPOCH[675/1000] loss0.006-|Sample:4.67|
EPOCH[676/1000] loss0.005-|Sample:5.17|
EPOCH[677/1000] loss0.006-|Sample:4.59|
EPOCH[678/1000] loss0.005-|Sample:4.94|
EPOCH[679/1000] loss0.006-|Sample:4.76|
EPOCH[680/1000] loss0.005-|Sample:4.73|
[TEST]
{'precision': array([0.03491861]), 'recall': array([0.11875469]), 'ndcg': array([0.09099635])}
EPOCH[681/1000] loss0.006-|Sample:4.67|
EPOCH[682/1000] loss0.006-|Sample:4.72|
EPOCH[683/1000] loss0.006-|Sample:5.67|
EPOCH[684/1000] loss0.006-|Sample:4.69|
EPOCH[685/1000] loss0.006-|Sample:4.75|
EPOCH[686/1000] loss0.006-|Sample:4.84|
EPOCH[687/1000] loss0.005-|Sample:4.66|
EPOCH[688/1000] loss0.006-|Sample:5.34|
EPOCH[689/1000] loss0.006-|Sample:5.87|
EPOCH[690/1000] loss0.005-|Sample:4.66|
[TEST]
{'precision': array([0.0351899]), 'recall': array([0.11902664]), 'ndcg': array([0.0919496])}
EPOCH[691/1000] loss0.006-|Sample:4.73|
EPOCH[692/1000] loss0.006-|Sample:4.81|
EPOCH[693/1000] loss0.005-|Sample:4.61|
EPOCH[694/1000] loss0.005-|Sample:5.09|
EPOCH[695/1000] loss0.006-|Sample:4.73|
EPOCH[696/1000] loss0.006-|Sample:4.66|
EPOCH[697/1000] loss0.005-|Sample:5.62|
EPOCH[698/1000] loss0.005-|Sample:4.83|
EPOCH[699/1000] loss0.005-|Sample:4.70|
EPOCH[700/1000] loss0.006-|Sample:5.34|
[TEST]
{'precision': array([0.03540592]), 'recall': array([0.11989616]), 'ndcg': array([0.09267597])}
EPOCH[701/1000] loss0.006-|Sample:4.75|
EPOCH[702/1000] loss0.006-|Sample:5.25|
EPOCH[703/1000] loss0.005-|Sample:4.67|
EPOCH[704/1000] loss0.005-|Sample:4.73|
EPOCH[705/1000] loss0.006-|Sample:5.28|
EPOCH[706/1000] loss0.006-|Sample:4.73|
EPOCH[707/1000] loss0.005-|Sample:4.66|
EPOCH[708/1000] loss0.005-|Sample:5.37|
EPOCH[709/1000] loss0.005-|Sample:4.97|
EPOCH[710/1000] loss0.006-|Sample:4.64|
[TEST]
{'precision': array([0.03549635]), 'recall': array([0.12033511]), 'ndcg': array([0.09296769])}
EPOCH[711/1000] loss0.006-|Sample:5.37|
EPOCH[712/1000] loss0.005-|Sample:4.70|
EPOCH[713/1000] loss0.005-|Sample:4.84|
EPOCH[714/1000] loss0.005-|Sample:4.76|
EPOCH[715/1000] loss0.005-|Sample:4.70|
EPOCH[716/1000] loss0.005-|Sample:4.83|
EPOCH[717/1000] loss0.005-|Sample:4.76|
EPOCH[718/1000] loss0.005-|Sample:4.66|
EPOCH[719/1000] loss0.006-|Sample:4.86|
EPOCH[720/1000] loss0.006-|Sample:4.95|
[TEST]
{'precision': array([0.03570232]), 'recall': array([0.12126256]), 'ndcg': array([0.09296272])}
EPOCH[721/1000] loss0.005-|Sample:4.69|
EPOCH[722/1000] loss0.006-|Sample:4.86|
EPOCH[723/1000] loss0.005-|Sample:4.76|
EPOCH[724/1000] loss0.006-|Sample:4.66|
EPOCH[725/1000] loss0.005-|Sample:4.92|
EPOCH[726/1000] loss0.005-|Sample:4.67|
EPOCH[727/1000] loss0.005-|Sample:4.75|
EPOCH[728/1000] loss0.005-|Sample:4.87|
EPOCH[729/1000] loss0.005-|Sample:4.62|
EPOCH[730/1000] loss0.005-|Sample:4.91|
[TEST]
{'precision': array([0.03594514]), 'recall': array([0.12212651]), 'ndcg': array([0.0942333])}
EPOCH[731/1000] loss0.005-|Sample:4.72|
EPOCH[732/1000] loss0.005-|Sample:5.45|
EPOCH[733/1000] loss0.005-|Sample:4.80|
EPOCH[734/1000] loss0.005-|Sample:4.64|
EPOCH[735/1000] loss0.005-|Sample:5.30|
EPOCH[736/1000] loss0.005-|Sample:4.75|
EPOCH[737/1000] loss0.005-|Sample:4.86|
EPOCH[738/1000] loss0.005-|Sample:4.64|
EPOCH[739/1000] loss0.006-|Sample:5.51|
EPOCH[740/1000] loss0.005-|Sample:4.75|
[TEST]
{'precision': array([0.03634872]), 'recall': array([0.12333202]), 'ndcg': array([0.09508998])}
EPOCH[741/1000] loss0.005-|Sample:4.95|
EPOCH[742/1000] loss0.005-|Sample:4.80|
EPOCH[743/1000] loss0.005-|Sample:4.61|
EPOCH[744/1000] loss0.005-|Sample:4.94|
EPOCH[745/1000] loss0.005-|Sample:4.76|
EPOCH[746/1000] loss0.005-|Sample:4.72|
EPOCH[747/1000] loss0.005-|Sample:5.67|
EPOCH[748/1000] loss0.005-|Sample:4.86|
EPOCH[749/1000] loss0.005-|Sample:4.70|
EPOCH[750/1000] loss0.005-|Sample:4.98|
[TEST]
{'precision': array([0.0364291]), 'recall': array([0.12308887]), 'ndcg': array([0.09617502])}
EPOCH[751/1000] loss0.006-|Sample:4.83|
EPOCH[752/1000] loss0.005-|Sample:4.61|
EPOCH[753/1000] loss0.005-|Sample:4.95|
EPOCH[754/1000] loss0.005-|Sample:4.78|
EPOCH[755/1000] loss0.005-|Sample:4.76|
EPOCH[756/1000] loss0.005-|Sample:4.92|
EPOCH[757/1000] loss0.005-|Sample:4.80|
EPOCH[758/1000] loss0.005-|Sample:4.70|
EPOCH[759/1000] loss0.005-|Sample:4.84|
EPOCH[760/1000] loss0.005-|Sample:4.61|
[TEST]
{'precision': array([0.03643915]), 'recall': array([0.12308755]), 'ndcg': array([0.09569424])}
EPOCH[761/1000] loss0.005-|Sample:4.91|
EPOCH[762/1000] loss0.005-|Sample:4.64|
EPOCH[763/1000] loss0.005-|Sample:4.92|
EPOCH[764/1000] loss0.005-|Sample:4.83|
EPOCH[765/1000] loss0.005-|Sample:4.83|
EPOCH[766/1000] loss0.005-|Sample:4.61|
EPOCH[767/1000] loss0.005-|Sample:5.44|
EPOCH[768/1000] loss0.005-|Sample:4.78|
EPOCH[769/1000] loss0.005-|Sample:4.67|
EPOCH[770/1000] loss0.005-|Sample:4.94|
[TEST]
{'precision': array([0.03670206]), 'recall': array([0.12402807]), 'ndcg': array([0.09626061])}
EPOCH[771/1000] loss0.005-|Sample:4.64|
EPOCH[772/1000] loss0.005-|Sample:5.16|
EPOCH[773/1000] loss0.005-|Sample:4.58|
EPOCH[774/1000] loss0.005-|Sample:4.72|
EPOCH[775/1000] loss0.005-|Sample:5.55|
EPOCH[776/1000] loss0.005-|Sample:4.66|
EPOCH[777/1000] loss0.005-|Sample:4.67|
EPOCH[778/1000] loss0.005-|Sample:4.89|
EPOCH[779/1000] loss0.005-|Sample:4.61|
EPOCH[780/1000] loss0.005-|Sample:4.87|
[TEST]
{'precision': array([0.03699678]), 'recall': array([0.12506682]), 'ndcg': array([0.09700371])}
EPOCH[781/1000] loss0.005-|Sample:4.84|
EPOCH[782/1000] loss0.005-|Sample:4.66|
EPOCH[783/1000] loss0.005-|Sample:4.92|
EPOCH[784/1000] loss0.005-|Sample:4.84|
EPOCH[785/1000] loss0.005-|Sample:4.66|
EPOCH[786/1000] loss0.005-|Sample:5.25|
EPOCH[787/1000] loss0.005-|Sample:5.14|
EPOCH[788/1000] loss0.005-|Sample:4.66|
EPOCH[789/1000] loss0.005-|Sample:5.25|
EPOCH[790/1000] loss0.005-|Sample:4.86|
[TEST]
{'precision': array([0.03728481]), 'recall': array([0.12594747]), 'ndcg': array([0.09812766])}
EPOCH[791/1000] loss0.005-|Sample:4.92|
EPOCH[792/1000] loss0.005-|Sample:4.78|
EPOCH[793/1000] loss0.005-|Sample:4.59|
EPOCH[794/1000] loss0.005-|Sample:5.69|
EPOCH[795/1000] loss0.005-|Sample:4.69|
EPOCH[796/1000] loss0.005-|Sample:4.87|
EPOCH[797/1000] loss0.005-|Sample:4.67|
EPOCH[798/1000] loss0.005-|Sample:4.83|
EPOCH[799/1000] loss0.005-|Sample:4.84|
EPOCH[800/1000] loss0.005-|Sample:4.64|
[TEST]
{'precision': array([0.03730491]), 'recall': array([0.12637035]), 'ndcg': array([0.0981321])}
EPOCH[801/1000] loss0.005-|Sample:4.84|
EPOCH[802/1000] loss0.005-|Sample:4.72|
EPOCH[803/1000] loss0.005-|Sample:4.87|
EPOCH[804/1000] loss0.005-|Sample:4.80|
EPOCH[805/1000] loss0.005-|Sample:4.86|
EPOCH[806/1000] loss0.005-|Sample:4.92|
EPOCH[807/1000] loss0.005-|Sample:4.78|
EPOCH[808/1000] loss0.005-|Sample:4.72|
EPOCH[809/1000] loss0.005-|Sample:4.89|
EPOCH[810/1000] loss0.005-|Sample:4.69|
[TEST]
{'precision': array([0.0376415]), 'recall': array([0.12772822]), 'ndcg': array([0.09865516])}
EPOCH[811/1000] loss0.005-|Sample:4.89|
EPOCH[812/1000] loss0.005-|Sample:5.03|
EPOCH[813/1000] loss0.005-|Sample:4.72|
EPOCH[814/1000] loss0.005-|Sample:4.75|
EPOCH[815/1000] loss0.005-|Sample:4.89|
EPOCH[816/1000] loss0.005-|Sample:4.62|
EPOCH[817/1000] loss0.005-|Sample:4.78|
EPOCH[818/1000] loss0.005-|Sample:5.61|
EPOCH[819/1000] loss0.005-|Sample:4.67|
EPOCH[820/1000] loss0.005-|Sample:5.70|
[TEST]
{'precision': array([0.03771686]), 'recall': array([0.12772731]), 'ndcg': array([0.09834748])}
EPOCH[821/1000] loss0.005-|Sample:4.67|
EPOCH[822/1000] loss0.005-|Sample:4.97|
EPOCH[823/1000] loss0.005-|Sample:4.80|
EPOCH[824/1000] loss0.005-|Sample:4.78|
EPOCH[825/1000] loss0.005-|Sample:4.67|
EPOCH[826/1000] loss0.005-|Sample:4.87|
EPOCH[827/1000] loss0.005-|Sample:4.84|
EPOCH[828/1000] loss0.005-|Sample:4.70|
EPOCH[829/1000] loss0.005-|Sample:4.86|
EPOCH[830/1000] loss0.005-|Sample:5.08|
[TEST]
{'precision': array([0.03786925]), 'recall': array([0.12795191]), 'ndcg': array([0.0990927])}
EPOCH[831/1000] loss0.005-|Sample:4.81|
EPOCH[832/1000] loss0.005-|Sample:4.84|
EPOCH[833/1000] loss0.005-|Sample:4.72|
EPOCH[834/1000] loss0.005-|Sample:5.00|
EPOCH[835/1000] loss0.005-|Sample:4.73|
EPOCH[836/1000] loss0.005-|Sample:4.81|
EPOCH[837/1000] loss0.005-|Sample:4.98|
EPOCH[838/1000] loss0.005-|Sample:4.72|
EPOCH[839/1000] loss0.005-|Sample:5.17|
EPOCH[840/1000] loss0.005-|Sample:4.66|
[TEST]
{'precision': array([0.03825105]), 'recall': array([0.12934412]), 'ndcg': array([0.10032059])}
EPOCH[841/1000] loss0.005-|Sample:4.69|
EPOCH[842/1000] loss0.005-|Sample:4.78|
EPOCH[843/1000] loss0.005-|Sample:4.78|
EPOCH[844/1000] loss0.005-|Sample:4.70|
EPOCH[845/1000] loss0.005-|Sample:4.84|
EPOCH[846/1000] loss0.005-|Sample:5.20|
EPOCH[847/1000] loss0.005-|Sample:4.72|
EPOCH[848/1000] loss0.005-|Sample:5.75|
EPOCH[849/1000] loss0.005-|Sample:4.86|
EPOCH[850/1000] loss0.005-|Sample:4.61|
[TEST]
{'precision': array([0.03832809]), 'recall': array([0.12980641]), 'ndcg': array([0.10098403])}
EPOCH[851/1000] loss0.005-|Sample:4.87|
EPOCH[852/1000] loss0.005-|Sample:4.62|
EPOCH[853/1000] loss0.005-|Sample:5.00|
EPOCH[854/1000] loss0.005-|Sample:4.73|
EPOCH[855/1000] loss0.005-|Sample:5.70|
EPOCH[856/1000] loss0.005-|Sample:4.62|
EPOCH[857/1000] loss0.005-|Sample:4.86|
EPOCH[858/1000] loss0.005-|Sample:4.76|
EPOCH[859/1000] loss0.005-|Sample:4.70|
EPOCH[860/1000] loss0.005-|Sample:4.83|
[TEST]
{'precision': array([0.03850057]), 'recall': array([0.13035848]), 'ndcg': array([0.10134143])}
EPOCH[861/1000] loss0.005-|Sample:5.25|
EPOCH[862/1000] loss0.005-|Sample:5.05|
EPOCH[863/1000] loss0.005-|Sample:4.72|
EPOCH[864/1000] loss0.005-|Sample:4.72|
EPOCH[865/1000] loss0.005-|Sample:4.95|
EPOCH[866/1000] loss0.005-|Sample:4.59|
EPOCH[867/1000] loss0.005-|Sample:5.44|
EPOCH[868/1000] loss0.005-|Sample:4.87|
EPOCH[869/1000] loss0.005-|Sample:4.70|
EPOCH[870/1000] loss0.005-|Sample:4.83|
[TEST]
{'precision': array([0.03869817]), 'recall': array([0.1309754]), 'ndcg': array([0.10200799])}
EPOCH[871/1000] loss0.005-|Sample:4.84|
EPOCH[872/1000] loss0.005-|Sample:4.66|
EPOCH[873/1000] loss0.005-|Sample:5.26|
EPOCH[874/1000] loss0.005-|Sample:4.95|
EPOCH[875/1000] loss0.005-|Sample:4.64|
EPOCH[876/1000] loss0.005-|Sample:5.19|
EPOCH[877/1000] loss0.005-|Sample:5.23|
EPOCH[878/1000] loss0.005-|Sample:4.67|
EPOCH[879/1000] loss0.005-|Sample:4.94|
EPOCH[880/1000] loss0.005-|Sample:5.25|
[TEST]
{'precision': array([0.03887735]), 'recall': array([0.13118875]), 'ndcg': array([0.1022988])}
EPOCH[881/1000] loss0.005-|Sample:4.80|
EPOCH[882/1000] loss0.005-|Sample:4.87|
EPOCH[883/1000] loss0.005-|Sample:4.83|
EPOCH[884/1000] loss0.005-|Sample:4.62|
EPOCH[885/1000] loss0.005-|Sample:4.75|
EPOCH[886/1000] loss0.005-|Sample:4.84|
EPOCH[887/1000] loss0.005-|Sample:4.67|
EPOCH[888/1000] loss0.005-|Sample:4.81|
EPOCH[889/1000] loss0.005-|Sample:4.97|
EPOCH[890/1000] loss0.005-|Sample:4.70|
[TEST]
{'precision': array([0.03891419]), 'recall': array([0.1318381]), 'ndcg': array([0.1023968])}
EPOCH[891/1000] loss0.005-|Sample:4.76|
EPOCH[892/1000] loss0.005-|Sample:4.72|
EPOCH[893/1000] loss0.005-|Sample:4.86|
EPOCH[894/1000] loss0.005-|Sample:4.62|
EPOCH[895/1000] loss0.005-|Sample:5.03|
EPOCH[896/1000] loss0.005-|Sample:4.92|
EPOCH[897/1000] loss0.005-|Sample:4.69|
EPOCH[898/1000] loss0.005-|Sample:5.67|
EPOCH[899/1000] loss0.005-|Sample:4.66|
EPOCH[900/1000] loss0.005-|Sample:5.92|
[TEST]
{'precision': array([0.03906658]), 'recall': array([0.13218765]), 'ndcg': array([0.10324211])}
EPOCH[901/1000] loss0.005-|Sample:4.95|
EPOCH[902/1000] loss0.005-|Sample:4.92|
EPOCH[903/1000] loss0.005-|Sample:4.75|
EPOCH[904/1000] loss0.005-|Sample:4.72|
EPOCH[905/1000] loss0.005-|Sample:5.11|
EPOCH[906/1000] loss0.005-|Sample:4.61|
EPOCH[907/1000] loss0.005-|Sample:5.05|
EPOCH[908/1000] loss0.005-|Sample:4.86|
EPOCH[909/1000] loss0.005-|Sample:4.75|
EPOCH[910/1000] loss0.005-|Sample:4.73|
[TEST]
{'precision': array([0.03891754]), 'recall': array([0.13185521]), 'ndcg': array([0.10297668])}
EPOCH[911/1000] loss0.005-|Sample:4.72|
EPOCH[912/1000] loss0.005-|Sample:5.12|
EPOCH[913/1000] loss0.005-|Sample:4.72|
EPOCH[914/1000] loss0.005-|Sample:4.97|
EPOCH[915/1000] loss0.005-|Sample:4.69|
EPOCH[916/1000] loss0.005-|Sample:4.86|
EPOCH[917/1000] loss0.005-|Sample:4.84|
EPOCH[918/1000] loss0.005-|Sample:4.62|
EPOCH[919/1000] loss0.005-|Sample:5.34|
EPOCH[920/1000] loss0.005-|Sample:4.86|
[TEST]
{'precision': array([0.03912519]), 'recall': array([0.13312669]), 'ndcg': array([0.1037287])}
EPOCH[921/1000] loss0.005-|Sample:5.44|
EPOCH[922/1000] loss0.005-|Sample:4.81|
EPOCH[923/1000] loss0.005-|Sample:4.62|
EPOCH[924/1000] loss0.005-|Sample:4.92|
EPOCH[925/1000] loss0.005-|Sample:4.72|
EPOCH[926/1000] loss0.005-|Sample:4.70|
EPOCH[927/1000] loss0.005-|Sample:4.84|
EPOCH[928/1000] loss0.005-|Sample:4.76|
EPOCH[929/1000] loss0.005-|Sample:4.73|
EPOCH[930/1000] loss0.005-|Sample:4.75|
[TEST]
{'precision': array([0.03924074]), 'recall': array([0.13286587]), 'ndcg': array([0.10361158])}
EPOCH[931/1000] loss0.005-|Sample:4.62|
EPOCH[932/1000] loss0.005-|Sample:4.95|
EPOCH[933/1000] loss0.005-|Sample:4.80|
EPOCH[934/1000] loss0.005-|Sample:4.67|
EPOCH[935/1000] loss0.005-|Sample:4.86|
EPOCH[936/1000] loss0.005-|Sample:4.83|
EPOCH[937/1000] loss0.005-|Sample:4.67|
EPOCH[938/1000] loss0.005-|Sample:4.92|
EPOCH[939/1000] loss0.005-|Sample:4.75|
EPOCH[940/1000] loss0.005-|Sample:4.62|
[TEST]
{'precision': array([0.03930605]), 'recall': array([0.1328751]), 'ndcg': array([0.10371612])}
EPOCH[941/1000] loss0.005-|Sample:4.69|
EPOCH[942/1000] loss0.005-|Sample:4.86|
EPOCH[943/1000] loss0.005-|Sample:4.66|
EPOCH[944/1000] loss0.005-|Sample:5.37|
EPOCH[945/1000] loss0.005-|Sample:4.62|
EPOCH[946/1000] loss0.005-|Sample:4.89|
EPOCH[947/1000] loss0.005-|Sample:4.92|
EPOCH[948/1000] loss0.005-|Sample:4.64|
EPOCH[949/1000] loss0.005-|Sample:5.16|
EPOCH[950/1000] loss0.005-|Sample:5.61|
[TEST]
{'precision': array([0.03960748]), 'recall': array([0.13451011]), 'ndcg': array([0.10535183])}
EPOCH[951/1000] loss0.005-|Sample:5.42|
EPOCH[952/1000] loss0.005-|Sample:5.00|
EPOCH[953/1000] loss0.005-|Sample:4.70|
EPOCH[954/1000] loss0.005-|Sample:4.66|
EPOCH[955/1000] loss0.005-|Sample:4.89|
EPOCH[956/1000] loss0.005-|Sample:4.67|
EPOCH[957/1000] loss0.005-|Sample:5.39|
EPOCH[958/1000] loss0.005-|Sample:4.67|
EPOCH[959/1000] loss0.005-|Sample:5.47|
EPOCH[960/1000] loss0.005-|Sample:4.61|
[TEST]
{'precision': array([0.03952207]), 'recall': array([0.13405697]), 'ndcg': array([0.10423513])}
EPOCH[961/1000] loss0.005-|Sample:5.45|
EPOCH[962/1000] loss0.005-|Sample:4.59|
EPOCH[963/1000] loss0.005-|Sample:4.76|
EPOCH[964/1000] loss0.005-|Sample:4.86|
EPOCH[965/1000] loss0.005-|Sample:4.73|
EPOCH[966/1000] loss0.005-|Sample:4.75|
EPOCH[967/1000] loss0.005-|Sample:4.78|
EPOCH[968/1000] loss0.005-|Sample:4.66|
EPOCH[969/1000] loss0.005-|Sample:5.36|
EPOCH[970/1000] loss0.005-|Sample:5.19|
[TEST]
{'precision': array([0.03992565]), 'recall': array([0.13507576]), 'ndcg': array([0.10585997])}
EPOCH[971/1000] loss0.005-|Sample:4.83|
EPOCH[972/1000] loss0.005-|Sample:4.66|
EPOCH[973/1000] loss0.005-|Sample:4.73|
EPOCH[974/1000] loss0.005-|Sample:4.67|
EPOCH[975/1000] loss0.005-|Sample:4.83|
EPOCH[976/1000] loss0.005-|Sample:4.75|
EPOCH[977/1000] loss0.005-|Sample:4.73|
EPOCH[978/1000] loss0.005-|Sample:5.50|
EPOCH[979/1000] loss0.005-|Sample:4.73|
EPOCH[980/1000] loss0.005-|Sample:4.73|
[TEST]
{'precision': array([0.0399156]), 'recall': array([0.13511635]), 'ndcg': array([0.10565528])}
EPOCH[981/1000] loss0.005-|Sample:4.67|
EPOCH[982/1000] loss0.005-|Sample:4.94|
EPOCH[983/1000] loss0.005-|Sample:4.94|
EPOCH[984/1000] loss0.005-|Sample:4.69|
EPOCH[985/1000] loss0.005-|Sample:4.83|
EPOCH[986/1000] loss0.005-|Sample:4.91|
EPOCH[987/1000] loss0.005-|Sample:4.76|
EPOCH[988/1000] loss0.005-|Sample:4.67|
EPOCH[989/1000] loss0.005-|Sample:5.50|
EPOCH[990/1000] loss0.005-|Sample:4.89|
[TEST]
{'precision': array([0.039718]), 'recall': array([0.13396211]), 'ndcg': array([0.10497486])}
EPOCH[991/1000] loss0.005-|Sample:4.94|
EPOCH[992/1000] loss0.005-|Sample:4.87|
EPOCH[993/1000] loss0.005-|Sample:4.59|
EPOCH[994/1000] loss0.005-|Sample:4.89|
EPOCH[995/1000] loss0.005-|Sample:4.78|
EPOCH[996/1000] loss0.005-|Sample:4.70|
EPOCH[997/1000] loss0.005-|Sample:5.34|
EPOCH[998/1000] loss0.005-|Sample:4.81|
EPOCH[999/1000] loss0.005-|Sample:4.69|
EPOCH[1000/1000] loss0.005-|Sample:4.87|

Process finished with exit code 0

model:lgn layers:2
D:\ProgramFiles\Anaconda3\envs\image_caption_python36\python.exe D:/workspace/LightGcn/LightGCN-PyTorch-master/code/main.py
Cpp extension not loaded
>>SEED: 2020
loading [../data/gowalla]
810128 interactions for training
217242 interactions for testing
gowalla Sparsity : 0.0008396216228570436
gowalla is ready to go
===========config================
{'A_n_fold': 100,
 'A_split': False,
 'bigdata': False,
 'bpr_batch_size': 2048,
 'decay': 0.0001,
 'dropout': 0,
 'keep_prob': 0.6,
 'latent_dim_rec': 64,
 'lightGCN_n_layers': 2,
 'lr': 0.001,
 'multicore': 0,
 'pretrain': 0,
 'test_u_batch_size': 100}
cores for test: 6
comment: lgn
tensorboard: 1
LOAD: 0
Weight path: ./checkpoints
Test Topks: [20]
using bpr loss
===========end===================
use NORMAL distribution initilizer
loading adjacency matrix
successfully loaded...
don't split the matrix
lgn is already to go(dropout:0)
load and save to /home/qhc/下载/LightGCN-PyTorch-master\code\checkpoints\lgn-gowalla-2-64.pth.tar
[TEST]
{'precision': array([0.00016076]), 'recall': array([0.00045107]), 'ndcg': array([0.0003354])}
EPOCH[1/1000] loss0.631-|Sample:5.05|
EPOCH[2/1000] loss0.308-|Sample:6.55|
EPOCH[3/1000] loss0.176-|Sample:5.05|
EPOCH[4/1000] loss0.130-|Sample:5.23|
EPOCH[5/1000] loss0.107-|Sample:5.05|
EPOCH[6/1000] loss0.093-|Sample:5.23|
EPOCH[7/1000] loss0.083-|Sample:5.20|
EPOCH[8/1000] loss0.076-|Sample:5.23|
EPOCH[9/1000] loss0.070-|Sample:5.17|
EPOCH[10/1000] loss0.066-|Sample:5.20|
[TEST]
{'precision': array([0.03854746]), 'recall': array([0.12597917]), 'ndcg': array([0.10687038])}
EPOCH[11/1000] loss0.062-|Sample:5.08|
EPOCH[12/1000] loss0.059-|Sample:5.16|
EPOCH[13/1000] loss0.056-|Sample:5.30|
EPOCH[14/1000] loss0.055-|Sample:5.25|
EPOCH[15/1000] loss0.052-|Sample:5.44|
EPOCH[16/1000] loss0.050-|Sample:5.22|
EPOCH[17/1000] loss0.048-|Sample:5.20|
EPOCH[18/1000] loss0.047-|Sample:5.25|
EPOCH[19/1000] loss0.045-|Sample:5.30|
EPOCH[20/1000] loss0.044-|Sample:5.40|
[TEST]
{'precision': array([0.04175263]), 'recall': array([0.13762364]), 'ndcg': array([0.11552258])}
EPOCH[21/1000] loss0.043-|Sample:5.14|
EPOCH[22/1000] loss0.042-|Sample:5.16|
EPOCH[23/1000] loss0.041-|Sample:5.33|
EPOCH[24/1000] loss0.039-|Sample:5.34|
EPOCH[25/1000] loss0.038-|Sample:5.11|
EPOCH[26/1000] loss0.038-|Sample:5.16|
EPOCH[27/1000] loss0.037-|Sample:5.28|
EPOCH[28/1000] loss0.036-|Sample:5.09|
EPOCH[29/1000] loss0.035-|Sample:5.22|
EPOCH[30/1000] loss0.034-|Sample:5.22|
[TEST]
{'precision': array([0.04384085]), 'recall': array([0.14512236]), 'ndcg': array([0.12177178])}
EPOCH[31/1000] loss0.034-|Sample:5.14|
EPOCH[32/1000] loss0.033-|Sample:5.17|
EPOCH[33/1000] loss0.033-|Sample:5.36|
EPOCH[34/1000] loss0.031-|Sample:5.12|
EPOCH[35/1000] loss0.031-|Sample:5.06|
EPOCH[36/1000] loss0.031-|Sample:5.22|
EPOCH[37/1000] loss0.030-|Sample:5.08|
EPOCH[38/1000] loss0.029-|Sample:5.00|
EPOCH[39/1000] loss0.029-|Sample:5.23|
EPOCH[40/1000] loss0.028-|Sample:5.22|
[TEST]
{'precision': array([0.0451621]), 'recall': array([0.14977776]), 'ndcg': array([0.12633166])}
EPOCH[41/1000] loss0.028-|Sample:5.20|
EPOCH[42/1000] loss0.027-|Sample:5.03|
EPOCH[43/1000] loss0.027-|Sample:5.12|
EPOCH[44/1000] loss0.027-|Sample:5.94|
EPOCH[45/1000] loss0.026-|Sample:5.73|
EPOCH[46/1000] loss0.026-|Sample:5.12|
EPOCH[47/1000] loss0.025-|Sample:5.09|
EPOCH[48/1000] loss0.025-|Sample:5.17|
EPOCH[49/1000] loss0.025-|Sample:5.17|
EPOCH[50/1000] loss0.025-|Sample:5.28|
[TEST]
{'precision': array([0.04644149]), 'recall': array([0.15431087]), 'ndcg': array([0.1301939])}
EPOCH[51/1000] loss0.024-|Sample:5.25|
EPOCH[52/1000] loss0.024-|Sample:5.30|
EPOCH[53/1000] loss0.023-|Sample:5.23|
EPOCH[54/1000] loss0.023-|Sample:5.31|
EPOCH[55/1000] loss0.023-|Sample:5.26|
EPOCH[56/1000] loss0.023-|Sample:5.25|
EPOCH[57/1000] loss0.023-|Sample:5.23|
EPOCH[58/1000] loss0.022-|Sample:5.45|
EPOCH[59/1000] loss0.022-|Sample:5.16|
EPOCH[60/1000] loss0.021-|Sample:5.30|
[TEST]
{'precision': array([0.04732567]), 'recall': array([0.1578869]), 'ndcg': array([0.13304754])}
EPOCH[61/1000] loss0.021-|Sample:5.08|
EPOCH[62/1000] loss0.021-|Sample:5.39|
EPOCH[63/1000] loss0.021-|Sample:5.22|
EPOCH[64/1000] loss0.020-|Sample:5.47|
EPOCH[65/1000] loss0.021-|Sample:5.34|
EPOCH[66/1000] loss0.020-|Sample:5.16|
EPOCH[67/1000] loss0.020-|Sample:5.50|
EPOCH[68/1000] loss0.020-|Sample:5.31|
EPOCH[69/1000] loss0.019-|Sample:5.05|
EPOCH[70/1000] loss0.019-|Sample:5.39|
[TEST]
{'precision': array([0.04817804]), 'recall': array([0.16067318]), 'ndcg': array([0.13556841])}
EPOCH[71/1000] loss0.019-|Sample:5.25|
EPOCH[72/1000] loss0.019-|Sample:5.26|
EPOCH[73/1000] loss0.018-|Sample:5.36|
EPOCH[74/1000] loss0.019-|Sample:5.08|
EPOCH[75/1000] loss0.018-|Sample:5.48|
EPOCH[76/1000] loss0.018-|Sample:5.17|
EPOCH[77/1000] loss0.018-|Sample:5.30|
EPOCH[78/1000] loss0.017-|Sample:5.36|
EPOCH[79/1000] loss0.017-|Sample:5.31|
EPOCH[80/1000] loss0.017-|Sample:5.11|
[TEST]
{'precision': array([0.0489718]), 'recall': array([0.16333961]), 'ndcg': array([0.13780971])}
EPOCH[81/1000] loss0.017-|Sample:5.05|
EPOCH[82/1000] loss0.018-|Sample:5.25|
EPOCH[83/1000] loss0.017-|Sample:5.25|
EPOCH[84/1000] loss0.017-|Sample:5.26|
EPOCH[85/1000] loss0.017-|Sample:5.26|
EPOCH[86/1000] loss0.017-|Sample:5.01|
EPOCH[87/1000] loss0.017-|Sample:5.31|
EPOCH[88/1000] loss0.017-|Sample:5.11|
EPOCH[89/1000] loss0.016-|Sample:5.37|
EPOCH[90/1000] loss0.016-|Sample:5.20|
[TEST]
{'precision': array([0.0496835]), 'recall': array([0.1657156]), 'ndcg': array([0.13969128])}
EPOCH[91/1000] loss0.016-|Sample:5.14|
EPOCH[92/1000] loss0.016-|Sample:5.25|
EPOCH[93/1000] loss0.016-|Sample:5.11|
EPOCH[94/1000] loss0.016-|Sample:5.08|
EPOCH[95/1000] loss0.016-|Sample:5.47|
EPOCH[96/1000] loss0.015-|Sample:5.19|
EPOCH[97/1000] loss0.015-|Sample:5.25|
EPOCH[98/1000] loss0.015-|Sample:5.76|
EPOCH[99/1000] loss0.015-|Sample:5.17|
EPOCH[100/1000] loss0.016-|Sample:5.11|
[TEST]
{'precision': array([0.05005191]), 'recall': array([0.16615993]), 'ndcg': array([0.14098883])}
EPOCH[101/1000] loss0.015-|Sample:5.42|
EPOCH[102/1000] loss0.015-|Sample:5.05|
EPOCH[103/1000] loss0.015-|Sample:5.06|
EPOCH[104/1000] loss0.015-|Sample:5.40|
EPOCH[105/1000] loss0.015-|Sample:5.19|
EPOCH[106/1000] loss0.015-|Sample:5.06|
EPOCH[107/1000] loss0.014-|Sample:5.64|
EPOCH[108/1000] loss0.014-|Sample:5.26|
EPOCH[109/1000] loss0.014-|Sample:5.30|
EPOCH[110/1000] loss0.014-|Sample:5.26|
[TEST]
{'precision': array([0.05060118]), 'recall': array([0.16829863]), 'ndcg': array([0.14262569])}
EPOCH[111/1000] loss0.014-|Sample:5.11|
EPOCH[112/1000] loss0.014-|Sample:5.23|
EPOCH[113/1000] loss0.014-|Sample:5.34|
EPOCH[114/1000] loss0.014-|Sample:5.12|
EPOCH[115/1000] loss0.014-|Sample:5.11|
EPOCH[116/1000] loss0.014-|Sample:5.26|
EPOCH[117/1000] loss0.014-|Sample:5.25|
EPOCH[118/1000] loss0.014-|Sample:5.26|
EPOCH[119/1000] loss0.014-|Sample:5.44|
EPOCH[120/1000] loss0.013-|Sample:5.42|
[TEST]
{'precision': array([0.05076864]), 'recall': array([0.16857796]), 'ndcg': array([0.14335585])}
EPOCH[121/1000] loss0.013-|Sample:5.20|
EPOCH[122/1000] loss0.013-|Sample:5.40|
EPOCH[123/1000] loss0.013-|Sample:5.69|
EPOCH[124/1000] loss0.013-|Sample:5.40|
EPOCH[125/1000] loss0.013-|Sample:5.05|
EPOCH[126/1000] loss0.013-|Sample:5.45|
EPOCH[127/1000] loss0.013-|Sample:5.26|
EPOCH[128/1000] loss0.013-|Sample:5.26|
EPOCH[129/1000] loss0.013-|Sample:5.33|
EPOCH[130/1000] loss0.013-|Sample:5.01|
[TEST]
{'precision': array([0.05116049]), 'recall': array([0.16947962]), 'ndcg': array([0.14445464])}
EPOCH[131/1000] loss0.013-|Sample:5.47|
EPOCH[132/1000] loss0.013-|Sample:5.11|
EPOCH[133/1000] loss0.013-|Sample:5.25|
EPOCH[134/1000] loss0.013-|Sample:5.53|
EPOCH[135/1000] loss0.013-|Sample:5.16|
EPOCH[136/1000] loss0.012-|Sample:5.14|
EPOCH[137/1000] loss0.012-|Sample:5.33|
EPOCH[138/1000] loss0.013-|Sample:5.16|
EPOCH[139/1000] loss0.012-|Sample:5.45|
EPOCH[140/1000] loss0.012-|Sample:5.11|
[TEST]
{'precision': array([0.05165952]), 'recall': array([0.17096932]), 'ndcg': array([0.14562158])}
EPOCH[141/1000] loss0.012-|Sample:5.41|
EPOCH[142/1000] loss0.012-|Sample:5.23|
EPOCH[143/1000] loss0.012-|Sample:5.09|
EPOCH[144/1000] loss0.012-|Sample:5.25|
EPOCH[145/1000] loss0.012-|Sample:5.23|
EPOCH[146/1000] loss0.012-|Sample:5.45|
EPOCH[147/1000] loss0.012-|Sample:5.36|
EPOCH[148/1000] loss0.012-|Sample:5.22|
EPOCH[149/1000] loss0.012-|Sample:5.17|
EPOCH[150/1000] loss0.012-|Sample:5.19|
[TEST]
{'precision': array([0.05158751]), 'recall': array([0.17055169]), 'ndcg': array([0.14573762])}
EPOCH[151/1000] loss0.012-|Sample:5.23|
EPOCH[152/1000] loss0.012-|Sample:5.39|
EPOCH[153/1000] loss0.012-|Sample:5.69|
EPOCH[154/1000] loss0.012-|Sample:6.37|
EPOCH[155/1000] loss0.012-|Sample:6.56|
EPOCH[156/1000] loss0.012-|Sample:5.61|
EPOCH[157/1000] loss0.012-|Sample:5.92|
EPOCH[158/1000] loss0.011-|Sample:6.73|
EPOCH[159/1000] loss0.011-|Sample:5.65|
EPOCH[160/1000] loss0.012-|Sample:5.55|
[TEST]
{'precision': array([0.05196765]), 'recall': array([0.1714687]), 'ndcg': array([0.14641065])}
EPOCH[161/1000] loss0.011-|Sample:5.67|
EPOCH[162/1000] loss0.011-|Sample:5.98|
EPOCH[163/1000] loss0.011-|Sample:5.81|
EPOCH[164/1000] loss0.011-|Sample:5.44|
EPOCH[165/1000] loss0.011-|Sample:5.67|
EPOCH[166/1000] loss0.011-|Sample:6.51|
EPOCH[167/1000] loss0.011-|Sample:6.48|
EPOCH[168/1000] loss0.011-|Sample:5.87|
EPOCH[169/1000] loss0.011-|Sample:5.55|
EPOCH[170/1000] loss0.011-|Sample:6.14|
[TEST]
{'precision': array([0.05203631]), 'recall': array([0.1714023]), 'ndcg': array([0.14665241])}
EPOCH[171/1000] loss0.011-|Sample:5.76|
EPOCH[172/1000] loss0.011-|Sample:5.87|
EPOCH[173/1000] loss0.011-|Sample:6.19|
EPOCH[174/1000] loss0.011-|Sample:5.56|
EPOCH[175/1000] loss0.011-|Sample:6.55|
EPOCH[176/1000] loss0.011-|Sample:6.25|
EPOCH[177/1000] loss0.011-|Sample:5.62|
EPOCH[178/1000] loss0.011-|Sample:5.90|
EPOCH[179/1000] loss0.011-|Sample:6.87|
EPOCH[180/1000] loss0.011-|Sample:5.40|
[TEST]
{'precision': array([0.05218199]), 'recall': array([0.17192837]), 'ndcg': array([0.14705357])}
EPOCH[181/1000] loss0.011-|Sample:5.50|
EPOCH[182/1000] loss0.011-|Sample:5.90|
EPOCH[183/1000] loss0.011-|Sample:5.98|
EPOCH[184/1000] loss0.011-|Sample:5.53|
EPOCH[185/1000] loss0.011-|Sample:7.00|
EPOCH[186/1000] loss0.011-|Sample:6.30|
EPOCH[187/1000] loss0.011-|Sample:5.90|
EPOCH[188/1000] loss0.011-|Sample:6.39|
EPOCH[189/1000] loss0.011-|Sample:6.31|
EPOCH[190/1000] loss0.011-|Sample:6.08|
[TEST]
{'precision': array([0.0523863]), 'recall': array([0.17246873]), 'ndcg': array([0.14755357])}
EPOCH[191/1000] loss0.011-|Sample:6.26|
EPOCH[192/1000] loss0.011-|Sample:5.53|
EPOCH[193/1000] loss0.011-|Sample:5.50|
EPOCH[194/1000] loss0.010-|Sample:6.55|
EPOCH[195/1000] loss0.011-|Sample:5.55|
EPOCH[196/1000] loss0.010-|Sample:5.80|
EPOCH[197/1000] loss0.010-|Sample:6.75|
EPOCH[198/1000] loss0.011-|Sample:7.08|
EPOCH[199/1000] loss0.010-|Sample:5.65|
EPOCH[200/1000] loss0.010-|Sample:6.23|
[TEST]
{'precision': array([0.05258892]), 'recall': array([0.17310102]), 'ndcg': array([0.14806417])}
EPOCH[201/1000] loss0.010-|Sample:6.17|
EPOCH[202/1000] loss0.010-|Sample:5.45|
EPOCH[203/1000] loss0.010-|Sample:5.76|
EPOCH[204/1000] loss0.010-|Sample:6.11|
EPOCH[205/1000] loss0.010-|Sample:5.81|
EPOCH[206/1000] loss0.010-|Sample:5.59|
EPOCH[207/1000] loss0.010-|Sample:5.58|
EPOCH[208/1000] loss0.010-|Sample:5.84|
EPOCH[209/1000] loss0.010-|Sample:6.26|
EPOCH[210/1000] loss0.010-|Sample:5.95|
[TEST]
{'precision': array([0.05257552]), 'recall': array([0.17335511]), 'ndcg': array([0.14803736])}
EPOCH[211/1000] loss0.010-|Sample:5.61|
EPOCH[212/1000] loss0.010-|Sample:6.75|
EPOCH[213/1000] loss0.010-|Sample:6.14|
EPOCH[214/1000] loss0.010-|Sample:5.90|
EPOCH[215/1000] loss0.010-|Sample:6.25|
EPOCH[216/1000] loss0.010-|Sample:6.50|
EPOCH[217/1000] loss0.010-|Sample:6.09|
EPOCH[218/1000] loss0.010-|Sample:6.00|
EPOCH[219/1000] loss0.010-|Sample:5.81|
EPOCH[220/1000] loss0.010-|Sample:5.44|
[TEST]
{'precision': array([0.05244993]), 'recall': array([0.17274433]), 'ndcg': array([0.14784027])}
EPOCH[221/1000] loss0.010-|Sample:6.50|
EPOCH[222/1000] loss0.010-|Sample:5.73|
EPOCH[223/1000] loss0.010-|Sample:6.12|
EPOCH[224/1000] loss0.010-|Sample:6.90|
EPOCH[225/1000] loss0.010-|Sample:5.81|
EPOCH[226/1000] loss0.010-|Sample:5.51|
EPOCH[227/1000] loss0.010-|Sample:6.78|
EPOCH[228/1000] loss0.010-|Sample:6.08|
EPOCH[229/1000] loss0.010-|Sample:5.94|
EPOCH[230/1000] loss0.010-|Sample:6.11|
[TEST]
{'precision': array([0.05265925]), 'recall': array([0.17301737]), 'ndcg': array([0.1481508])}
EPOCH[231/1000] loss0.010-|Sample:6.30|
EPOCH[232/1000] loss0.010-|Sample:5.89|
EPOCH[233/1000] loss0.010-|Sample:6.80|
EPOCH[234/1000] loss0.010-|Sample:5.51|
EPOCH[235/1000] loss0.010-|Sample:6.11|
EPOCH[236/1000] loss0.010-|Sample:6.11|
EPOCH[237/1000] loss0.010-|Sample:5.56|
EPOCH[238/1000] loss0.010-|Sample:5.34|
EPOCH[239/1000] loss0.010-|Sample:5.89|
EPOCH[240/1000] loss0.010-|Sample:5.56|
[TEST]
{'precision': array([0.05275638]), 'recall': array([0.17323869]), 'ndcg': array([0.1481797])}
EPOCH[241/1000] loss0.010-|Sample:5.92|
EPOCH[242/1000] loss0.010-|Sample:6.26|
EPOCH[243/1000] loss0.010-|Sample:6.14|
EPOCH[244/1000] loss0.010-|Sample:5.72|
EPOCH[245/1000] loss0.010-|Sample:5.97|
EPOCH[246/1000] loss0.010-|Sample:5.83|
EPOCH[247/1000] loss0.010-|Sample:6.12|
EPOCH[248/1000] loss0.010-|Sample:5.87|
EPOCH[249/1000] loss0.010-|Sample:5.67|
EPOCH[250/1000] loss0.010-|Sample:6.50|
[TEST]
{'precision': array([0.0527748]), 'recall': array([0.17311321]), 'ndcg': array([0.14836802])}
EPOCH[251/1000] loss0.010-|Sample:6.06|
EPOCH[252/1000] loss0.010-|Sample:6.50|
EPOCH[253/1000] loss0.010-|Sample:6.75|
EPOCH[254/1000] loss0.010-|Sample:6.26|
EPOCH[255/1000] loss0.010-|Sample:6.03|
EPOCH[256/1000] loss0.010-|Sample:5.76|
EPOCH[257/1000] loss0.009-|Sample:6.67|
EPOCH[258/1000] loss0.010-|Sample:6.56|
EPOCH[259/1000] loss0.010-|Sample:6.23|
EPOCH[260/1000] loss0.010-|Sample:5.51|
[TEST]
{'precision': array([0.05291547]), 'recall': array([0.17357679]), 'ndcg': array([0.14853191])}
EPOCH[261/1000] loss0.010-|Sample:6.37|
EPOCH[262/1000] loss0.010-|Sample:6.23|
EPOCH[263/1000] loss0.009-|Sample:5.86|
EPOCH[264/1000] loss0.009-|Sample:6.25|
EPOCH[265/1000] loss0.010-|Sample:5.78|
EPOCH[266/1000] loss0.009-|Sample:6.51|
EPOCH[267/1000] loss0.009-|Sample:6.72|
EPOCH[268/1000] loss0.010-|Sample:5.51|
EPOCH[269/1000] loss0.009-|Sample:6.22|
EPOCH[270/1000] loss0.010-|Sample:6.31|
[TEST]
{'precision': array([0.0530779]), 'recall': array([0.17416434]), 'ndcg': array([0.1487405])}
EPOCH[271/1000] loss0.010-|Sample:6.17|
EPOCH[272/1000] loss0.009-|Sample:6.87|
EPOCH[273/1000] loss0.009-|Sample:5.84|
EPOCH[274/1000] loss0.010-|Sample:5.48|
EPOCH[275/1000] loss0.009-|Sample:6.90|
EPOCH[276/1000] loss0.009-|Sample:5.97|
EPOCH[277/1000] loss0.009-|Sample:5.83|
EPOCH[278/1000] loss0.009-|Sample:5.78|
EPOCH[279/1000] loss0.009-|Sample:6.03|
EPOCH[280/1000] loss0.009-|Sample:6.48|
[TEST]
{'precision': array([0.05322024]), 'recall': array([0.1743889]), 'ndcg': array([0.14926288])}
EPOCH[281/1000] loss0.009-|Sample:6.26|
EPOCH[282/1000] loss0.009-|Sample:6.37|
EPOCH[283/1000] loss0.009-|Sample:5.69|
EPOCH[284/1000] loss0.009-|Sample:6.83|
EPOCH[285/1000] loss0.009-|Sample:6.20|
EPOCH[286/1000] loss0.009-|Sample:5.69|
EPOCH[287/1000] loss0.009-|Sample:5.83|
EPOCH[288/1000] loss0.009-|Sample:6.97|
EPOCH[289/1000] loss0.009-|Sample:5.56|
EPOCH[290/1000] loss0.009-|Sample:5.84|
[TEST]
{'precision': array([0.05312647]), 'recall': array([0.17438006]), 'ndcg': array([0.14933835])}
EPOCH[291/1000] loss0.009-|Sample:6.25|
EPOCH[292/1000] loss0.009-|Sample:5.67|
EPOCH[293/1000] loss0.009-|Sample:5.72|
EPOCH[294/1000] loss0.009-|Sample:6.28|
EPOCH[295/1000] loss0.009-|Sample:5.67|
EPOCH[296/1000] loss0.009-|Sample:5.51|
EPOCH[297/1000] loss0.009-|Sample:5.67|
EPOCH[298/1000] loss0.009-|Sample:5.98|
EPOCH[299/1000] loss0.009-|Sample:5.51|
EPOCH[300/1000] loss0.009-|Sample:6.65|
[TEST]
{'precision': array([0.0530913]), 'recall': array([0.1740887]), 'ndcg': array([0.14943715])}
EPOCH[301/1000] loss0.009-|Sample:5.98|
EPOCH[302/1000] loss0.009-|Sample:5.47|
EPOCH[303/1000] loss0.009-|Sample:5.90|
EPOCH[304/1000] loss0.009-|Sample:6.15|
EPOCH[305/1000] loss0.009-|Sample:5.51|
EPOCH[306/1000] loss0.009-|Sample:5.92|
EPOCH[307/1000] loss0.009-|Sample:6.55|
EPOCH[308/1000] loss0.009-|Sample:5.80|
EPOCH[309/1000] loss0.009-|Sample:6.76|
EPOCH[310/1000] loss0.009-|Sample:5.84|
[TEST]
{'precision': array([0.05318173]), 'recall': array([0.17429539]), 'ndcg': array([0.14938921])}
EPOCH[311/1000] loss0.009-|Sample:5.48|
EPOCH[312/1000] loss0.009-|Sample:6.25|
EPOCH[313/1000] loss0.009-|Sample:5.69|
EPOCH[314/1000] loss0.009-|Sample:5.42|
EPOCH[315/1000] loss0.009-|Sample:6.12|
EPOCH[316/1000] loss0.009-|Sample:5.86|
EPOCH[317/1000] loss0.009-|Sample:5.53|
EPOCH[318/1000] loss0.009-|Sample:6.64|
EPOCH[319/1000] loss0.009-|Sample:6.40|
EPOCH[320/1000] loss0.009-|Sample:5.78|
[TEST]
{'precision': array([0.05332407]), 'recall': array([0.1744975]), 'ndcg': array([0.14944304])}
EPOCH[321/1000] loss0.009-|Sample:5.72|
EPOCH[322/1000] loss0.009-|Sample:7.05|
EPOCH[323/1000] loss0.009-|Sample:5.48|
EPOCH[324/1000] loss0.009-|Sample:6.22|
EPOCH[325/1000] loss0.009-|Sample:5.69|
EPOCH[326/1000] loss0.009-|Sample:5.62|
EPOCH[327/1000] loss0.009-|Sample:5.98|
EPOCH[328/1000] loss0.009-|Sample:5.51|
EPOCH[329/1000] loss0.009-|Sample:5.47|
EPOCH[330/1000] loss0.009-|Sample:5.95|
[TEST]
{'precision': array([0.05332909]), 'recall': array([0.17496463]), 'ndcg': array([0.14926782])}
EPOCH[331/1000] loss0.009-|Sample:6.58|
EPOCH[332/1000] loss0.009-|Sample:5.50|
EPOCH[333/1000] loss0.009-|Sample:6.23|
EPOCH[334/1000] loss0.009-|Sample:5.92|
EPOCH[335/1000] loss0.009-|Sample:5.73|
EPOCH[336/1000] loss0.009-|Sample:5.69|
EPOCH[337/1000] loss0.009-|Sample:5.95|
EPOCH[338/1000] loss0.009-|Sample:5.78|
EPOCH[339/1000] loss0.009-|Sample:5.97|
EPOCH[340/1000] loss0.009-|Sample:6.53|
[TEST]
{'precision': array([0.05338603]), 'recall': array([0.17467976]), 'ndcg': array([0.1497984])}
EPOCH[341/1000] loss0.009-|Sample:5.50|
EPOCH[342/1000] loss0.009-|Sample:6.40|
EPOCH[343/1000] loss0.009-|Sample:6.84|
EPOCH[344/1000] loss0.009-|Sample:5.59|
EPOCH[345/1000] loss0.009-|Sample:5.98|
EPOCH[346/1000] loss0.009-|Sample:5.86|
EPOCH[347/1000] loss0.009-|Sample:6.01|
EPOCH[348/1000] loss0.009-|Sample:6.17|
EPOCH[349/1000] loss0.009-|Sample:6.11|
EPOCH[350/1000] loss0.009-|Sample:5.97|
[TEST]
{'precision': array([0.05342454]), 'recall': array([0.17493299]), 'ndcg': array([0.14971897])}
EPOCH[351/1000] loss0.009-|Sample:6.11|
EPOCH[352/1000] loss0.009-|Sample:7.20|
EPOCH[353/1000] loss0.009-|Sample:6.01|
EPOCH[354/1000] loss0.009-|Sample:5.56|
EPOCH[355/1000] loss0.009-|Sample:6.23|
EPOCH[356/1000] loss0.009-|Sample:5.42|
EPOCH[357/1000] loss0.009-|Sample:5.56|
EPOCH[358/1000] loss0.009-|Sample:6.44|
EPOCH[359/1000] loss0.009-|Sample:6.11|
EPOCH[360/1000] loss0.009-|Sample:6.08|
[TEST]
{'precision': array([0.05336091]), 'recall': array([0.1742197]), 'ndcg': array([0.14923203])}
EPOCH[361/1000] loss0.009-|Sample:5.40|
EPOCH[362/1000] loss0.009-|Sample:5.67|
EPOCH[363/1000] loss0.009-|Sample:5.76|
EPOCH[364/1000] loss0.009-|Sample:6.92|
EPOCH[365/1000] loss0.009-|Sample:5.67|
EPOCH[366/1000] loss0.009-|Sample:5.53|
EPOCH[367/1000] loss0.009-|Sample:5.62|
EPOCH[368/1000] loss0.009-|Sample:5.84|
EPOCH[369/1000] loss0.009-|Sample:5.86|
EPOCH[370/1000] loss0.009-|Sample:5.55|
[TEST]
{'precision': array([0.05356688]), 'recall': array([0.17490122]), 'ndcg': array([0.14966137])}
EPOCH[371/1000] loss0.009-|Sample:5.50|
EPOCH[372/1000] loss0.009-|Sample:5.95|
EPOCH[373/1000] loss0.009-|Sample:6.98|
EPOCH[374/1000] loss0.009-|Sample:6.05|
EPOCH[375/1000] loss0.009-|Sample:5.58|
EPOCH[376/1000] loss0.009-|Sample:5.53|
EPOCH[377/1000] loss0.009-|Sample:6.26|
EPOCH[378/1000] loss0.009-|Sample:5.59|
EPOCH[379/1000] loss0.009-|Sample:6.17|
EPOCH[380/1000] loss0.009-|Sample:5.87|
[TEST]
{'precision': array([0.05364057]), 'recall': array([0.17534619]), 'ndcg': array([0.14989089])}
EPOCH[381/1000] loss0.009-|Sample:6.20|
EPOCH[382/1000] loss0.009-|Sample:6.20|
EPOCH[383/1000] loss0.009-|Sample:5.81|
EPOCH[384/1000] loss0.009-|Sample:5.76|
EPOCH[385/1000] loss0.009-|Sample:6.15|
EPOCH[386/1000] loss0.009-|Sample:5.50|
EPOCH[387/1000] loss0.009-|Sample:6.61|
EPOCH[388/1000] loss0.009-|Sample:5.72|
EPOCH[389/1000] loss0.009-|Sample:6.44|
EPOCH[390/1000] loss0.009-|Sample:6.45|
[TEST]
{'precision': array([0.05366234]), 'recall': array([0.17521756]), 'ndcg': array([0.1496048])}
EPOCH[391/1000] loss0.009-|Sample:6.19|
EPOCH[392/1000] loss0.009-|Sample:5.83|
EPOCH[393/1000] loss0.009-|Sample:5.94|
EPOCH[394/1000] loss0.009-|Sample:5.84|
EPOCH[395/1000] loss0.009-|Sample:5.86|
EPOCH[396/1000] loss0.009-|Sample:5.76|
EPOCH[397/1000] loss0.009-|Sample:5.64|
EPOCH[398/1000] loss0.009-|Sample:6.64|
EPOCH[399/1000] loss0.009-|Sample:6.62|
EPOCH[400/1000] loss0.009-|Sample:6.14|
[TEST]
{'precision': array([0.05367071]), 'recall': array([0.17546179]), 'ndcg': array([0.14992837])}
EPOCH[401/1000] loss0.009-|Sample:5.83|
EPOCH[402/1000] loss0.009-|Sample:5.86|
EPOCH[403/1000] loss0.009-|Sample:6.11|
EPOCH[404/1000] loss0.009-|Sample:5.78|
EPOCH[405/1000] loss0.009-|Sample:5.50|
EPOCH[406/1000] loss0.009-|Sample:6.09|
EPOCH[407/1000] loss0.009-|Sample:6.75|
EPOCH[408/1000] loss0.009-|Sample:6.00|
EPOCH[409/1000] loss0.009-|Sample:5.72|
EPOCH[410/1000] loss0.009-|Sample:5.98|
[TEST]
{'precision': array([0.05381472]), 'recall': array([0.17583204]), 'ndcg': array([0.14993281])}
EPOCH[411/1000] loss0.009-|Sample:6.67|
EPOCH[412/1000] loss0.009-|Sample:5.67|
EPOCH[413/1000] loss0.009-|Sample:6.15|
EPOCH[414/1000] loss0.009-|Sample:6.26|
EPOCH[415/1000] loss0.009-|Sample:6.00|
EPOCH[416/1000] loss0.009-|Sample:5.80|
EPOCH[417/1000] loss0.009-|Sample:6.42|
EPOCH[418/1000] loss0.009-|Sample:5.55|
EPOCH[419/1000] loss0.009-|Sample:5.98|
EPOCH[420/1000] loss0.009-|Sample:6.69|
[TEST]
{'precision': array([0.05394869]), 'recall': array([0.17611899]), 'ndcg': array([0.15067868])}
EPOCH[421/1000] loss0.009-|Sample:5.75|
EPOCH[422/1000] loss0.008-|Sample:5.59|
EPOCH[423/1000] loss0.009-|Sample:6.58|
EPOCH[424/1000] loss0.009-|Sample:5.39|
EPOCH[425/1000] loss0.009-|Sample:5.72|
EPOCH[426/1000] loss0.009-|Sample:6.58|
EPOCH[427/1000] loss0.009-|Sample:6.80|
EPOCH[428/1000] loss0.009-|Sample:5.55|
EPOCH[429/1000] loss0.009-|Sample:5.69|
EPOCH[430/1000] loss0.009-|Sample:6.05|
[TEST]
{'precision': array([0.05397883]), 'recall': array([0.17661072]), 'ndcg': array([0.15076979])}
EPOCH[431/1000] loss0.009-|Sample:6.90|
EPOCH[432/1000] loss0.009-|Sample:6.19|
EPOCH[433/1000] loss0.009-|Sample:5.89|
EPOCH[434/1000] loss0.009-|Sample:5.76|
EPOCH[435/1000] loss0.009-|Sample:6.20|
EPOCH[436/1000] loss0.009-|Sample:6.42|
EPOCH[437/1000] loss0.008-|Sample:6.51|
EPOCH[438/1000] loss0.009-|Sample:6.86|
EPOCH[439/1000] loss0.009-|Sample:5.47|
EPOCH[440/1000] loss0.009-|Sample:5.86|
[TEST]
{'precision': array([0.05381975]), 'recall': array([0.17592233]), 'ndcg': array([0.1504223])}
EPOCH[441/1000] loss0.009-|Sample:6.56|
EPOCH[442/1000] loss0.009-|Sample:5.95|
EPOCH[443/1000] loss0.009-|Sample:5.95|
EPOCH[444/1000] loss0.009-|Sample:6.40|
EPOCH[445/1000] loss0.009-|Sample:6.11|
EPOCH[446/1000] loss0.008-|Sample:5.61|
EPOCH[447/1000] loss0.008-|Sample:6.11|
EPOCH[448/1000] loss0.009-|Sample:6.30|
EPOCH[449/1000] loss0.009-|Sample:5.95|
EPOCH[450/1000] loss0.009-|Sample:6.50|
[TEST]
{'precision': array([0.05392525]), 'recall': array([0.17646222]), 'ndcg': array([0.15076079])}
EPOCH[451/1000] loss0.009-|Sample:5.70|
EPOCH[452/1000] loss0.008-|Sample:5.53|
EPOCH[453/1000] loss0.008-|Sample:5.81|
EPOCH[454/1000] loss0.008-|Sample:6.17|
EPOCH[455/1000] loss0.009-|Sample:6.08|
EPOCH[456/1000] loss0.009-|Sample:6.40|
EPOCH[457/1000] loss0.008-|Sample:6.17|
EPOCH[458/1000] loss0.008-|Sample:5.72|
EPOCH[459/1000] loss0.008-|Sample:5.55|
EPOCH[460/1000] loss0.009-|Sample:5.75|
[TEST]
{'precision': array([0.05377118]), 'recall': array([0.17547076]), 'ndcg': array([0.15029903])}
EPOCH[461/1000] loss0.009-|Sample:5.16|
EPOCH[462/1000] loss0.009-|Sample:4.97|
EPOCH[463/1000] loss0.008-|Sample:5.17|
EPOCH[464/1000] loss0.009-|Sample:4.98|
EPOCH[465/1000] loss0.009-|Sample:5.33|
EPOCH[466/1000] loss0.008-|Sample:5.09|
EPOCH[467/1000] loss0.008-|Sample:5.12|
EPOCH[468/1000] loss0.009-|Sample:5.36|
EPOCH[469/1000] loss0.009-|Sample:5.48|
EPOCH[470/1000] loss0.008-|Sample:5.42|
[TEST]
{'precision': array([0.05377453]), 'recall': array([0.17544623]), 'ndcg': array([0.15019388])}
EPOCH[471/1000] loss0.008-|Sample:5.31|
EPOCH[472/1000] loss0.009-|Sample:5.30|
EPOCH[473/1000] loss0.009-|Sample:5.12|
EPOCH[474/1000] loss0.008-|Sample:5.20|
EPOCH[475/1000] loss0.008-|Sample:5.75|
EPOCH[476/1000] loss0.008-|Sample:5.14|
EPOCH[477/1000] loss0.008-|Sample:5.45|
EPOCH[478/1000] loss0.008-|Sample:5.28|
EPOCH[479/1000] loss0.008-|Sample:5.33|
EPOCH[480/1000] loss0.008-|Sample:5.31|
[TEST]
{'precision': array([0.05395706]), 'recall': array([0.17574857]), 'ndcg': array([0.15058787])}
EPOCH[481/1000] loss0.008-|Sample:5.26|
EPOCH[482/1000] loss0.008-|Sample:5.19|
EPOCH[483/1000] loss0.008-|Sample:5.09|
EPOCH[484/1000] loss0.009-|Sample:5.19|
EPOCH[485/1000] loss0.008-|Sample:5.05|
EPOCH[486/1000] loss0.008-|Sample:5.16|
EPOCH[487/1000] loss0.009-|Sample:5.14|
EPOCH[488/1000] loss0.008-|Sample:5.28|
EPOCH[489/1000] loss0.008-|Sample:5.17|
EPOCH[490/1000] loss0.008-|Sample:5.25|
[TEST]
{'precision': array([0.05392692]), 'recall': array([0.17559022]), 'ndcg': array([0.15051428])}
EPOCH[491/1000] loss0.008-|Sample:5.09|
EPOCH[492/1000] loss0.008-|Sample:5.19|
EPOCH[493/1000] loss0.008-|Sample:5.16|
EPOCH[494/1000] loss0.008-|Sample:5.14|
EPOCH[495/1000] loss0.008-|Sample:5.19|
EPOCH[496/1000] loss0.009-|Sample:5.20|
EPOCH[497/1000] loss0.008-|Sample:5.37|
EPOCH[498/1000] loss0.008-|Sample:5.19|
EPOCH[499/1000] loss0.008-|Sample:5.50|
EPOCH[500/1000] loss0.008-|Sample:5.33|
[TEST]
{'precision': array([0.05402907]), 'recall': array([0.1759929]), 'ndcg': array([0.15085458])}
EPOCH[501/1000] loss0.008-|Sample:5.16|
EPOCH[502/1000] loss0.008-|Sample:5.25|
EPOCH[503/1000] loss0.008-|Sample:5.09|
EPOCH[504/1000] loss0.008-|Sample:5.22|
EPOCH[505/1000] loss0.008-|Sample:5.09|
EPOCH[506/1000] loss0.008-|Sample:5.23|
EPOCH[507/1000] loss0.008-|Sample:5.28|
EPOCH[508/1000] loss0.008-|Sample:5.36|
EPOCH[509/1000] loss0.009-|Sample:5.23|
EPOCH[510/1000] loss0.008-|Sample:5.11|
[TEST]
{'precision': array([0.05406089]), 'recall': array([0.17654525]), 'ndcg': array([0.15074748])}
EPOCH[511/1000] loss0.008-|Sample:5.20|
EPOCH[512/1000] loss0.008-|Sample:5.22|
EPOCH[513/1000] loss0.008-|Sample:5.09|
EPOCH[514/1000] loss0.008-|Sample:5.16|
EPOCH[515/1000] loss0.008-|Sample:5.12|
EPOCH[516/1000] loss0.008-|Sample:5.22|
EPOCH[517/1000] loss0.008-|Sample:5.51|
EPOCH[518/1000] loss0.008-|Sample:5.17|
EPOCH[519/1000] loss0.008-|Sample:5.17|
EPOCH[520/1000] loss0.008-|Sample:5.09|
[TEST]
{'precision': array([0.0541061]), 'recall': array([0.1767614]), 'ndcg': array([0.15098497])}
EPOCH[521/1000] loss0.008-|Sample:5.28|
EPOCH[522/1000] loss0.008-|Sample:5.25|
EPOCH[523/1000] loss0.008-|Sample:5.55|
EPOCH[524/1000] loss0.008-|Sample:5.23|
EPOCH[525/1000] loss0.008-|Sample:5.22|
EPOCH[526/1000] loss0.008-|Sample:5.03|
EPOCH[527/1000] loss0.008-|Sample:5.19|
EPOCH[528/1000] loss0.008-|Sample:5.36|
EPOCH[529/1000] loss0.008-|Sample:5.67|
EPOCH[530/1000] loss0.008-|Sample:5.51|
[TEST]
{'precision': array([0.0540073]), 'recall': array([0.17614438]), 'ndcg': array([0.15066386])}
EPOCH[531/1000] loss0.008-|Sample:5.28|
EPOCH[532/1000] loss0.008-|Sample:5.16|
EPOCH[533/1000] loss0.008-|Sample:5.09|
EPOCH[534/1000] loss0.008-|Sample:5.19|
EPOCH[535/1000] loss0.008-|Sample:5.19|
EPOCH[536/1000] loss0.008-|Sample:5.09|
EPOCH[537/1000] loss0.008-|Sample:5.30|
EPOCH[538/1000] loss0.008-|Sample:5.31|
EPOCH[539/1000] loss0.008-|Sample:5.22|
EPOCH[540/1000] loss0.008-|Sample:5.23|
[TEST]
{'precision': array([0.05398386]), 'recall': array([0.17614272]), 'ndcg': array([0.15037597])}
EPOCH[541/1000] loss0.008-|Sample:5.36|
EPOCH[542/1000] loss0.008-|Sample:5.12|
EPOCH[543/1000] loss0.008-|Sample:5.14|
EPOCH[544/1000] loss0.008-|Sample:5.47|
EPOCH[545/1000] loss0.008-|Sample:5.55|
EPOCH[546/1000] loss0.008-|Sample:5.17|
EPOCH[547/1000] loss0.008-|Sample:5.50|
EPOCH[548/1000] loss0.008-|Sample:5.28|
EPOCH[549/1000] loss0.008-|Sample:5.48|
EPOCH[550/1000] loss0.008-|Sample:5.22|
[TEST]
{'precision': array([0.05397046]), 'recall': array([0.17578026]), 'ndcg': array([0.15018271])}
EPOCH[551/1000] loss0.008-|Sample:5.06|
EPOCH[552/1000] loss0.008-|Sample:5.12|
EPOCH[553/1000] loss0.008-|Sample:5.28|
EPOCH[554/1000] loss0.008-|Sample:5.22|
EPOCH[555/1000] loss0.008-|Sample:5.22|
EPOCH[556/1000] loss0.008-|Sample:5.36|
EPOCH[557/1000] loss0.008-|Sample:5.34|
EPOCH[558/1000] loss0.008-|Sample:5.14|
EPOCH[559/1000] loss0.008-|Sample:5.53|
EPOCH[560/1000] loss0.008-|Sample:5.33|
[TEST]
{'precision': array([0.05398553]), 'recall': array([0.17593429]), 'ndcg': array([0.15040116])}
EPOCH[561/1000] loss0.008-|Sample:5.51|
EPOCH[562/1000] loss0.008-|Sample:5.20|
EPOCH[563/1000] loss0.008-|Sample:5.22|
EPOCH[564/1000] loss0.008-|Sample:5.14|
EPOCH[565/1000] loss0.008-|Sample:5.30|
EPOCH[566/1000] loss0.008-|Sample:5.36|
EPOCH[567/1000] loss0.008-|Sample:5.12|
EPOCH[568/1000] loss0.008-|Sample:5.36|
EPOCH[569/1000] loss0.008-|Sample:5.17|
EPOCH[570/1000] loss0.008-|Sample:5.19|
[TEST]
{'precision': array([0.0540207]), 'recall': array([0.17584707]), 'ndcg': array([0.15047125])}
EPOCH[571/1000] loss0.008-|Sample:5.23|
EPOCH[572/1000] loss0.008-|Sample:5.06|
EPOCH[573/1000] loss0.008-|Sample:5.31|
EPOCH[574/1000] loss0.008-|Sample:4.95|
EPOCH[575/1000] loss0.008-|Sample:5.19|
EPOCH[576/1000] loss0.008-|Sample:5.12|
EPOCH[577/1000] loss0.008-|Sample:5.26|
EPOCH[578/1000] loss0.008-|Sample:5.37|
EPOCH[579/1000] loss0.008-|Sample:5.11|
EPOCH[580/1000] loss0.008-|Sample:5.36|
[TEST]
{'precision': array([0.0538231]), 'recall': array([0.17484857]), 'ndcg': array([0.15000596])}
EPOCH[581/1000] loss0.008-|Sample:5.03|
EPOCH[582/1000] loss0.008-|Sample:5.39|
EPOCH[583/1000] loss0.008-|Sample:5.16|
EPOCH[584/1000] loss0.008-|Sample:5.11|
EPOCH[585/1000] loss0.008-|Sample:5.23|
EPOCH[586/1000] loss0.008-|Sample:5.25|
EPOCH[587/1000] loss0.008-|Sample:5.05|
EPOCH[588/1000] loss0.008-|Sample:5.06|
EPOCH[589/1000] loss0.008-|Sample:5.20|
EPOCH[590/1000] loss0.008-|Sample:5.17|
[TEST]
{'precision': array([0.05402572]), 'recall': array([0.17582418]), 'ndcg': array([0.15044943])}
EPOCH[591/1000] loss0.008-|Sample:5.14|
EPOCH[592/1000] loss0.008-|Sample:5.20|
EPOCH[593/1000] loss0.008-|Sample:5.31|
EPOCH[594/1000] loss0.008-|Sample:5.08|
EPOCH[595/1000] loss0.008-|Sample:5.12|
EPOCH[596/1000] loss0.008-|Sample:5.23|
EPOCH[597/1000] loss0.008-|Sample:5.11|
EPOCH[598/1000] loss0.008-|Sample:5.09|
EPOCH[599/1000] loss0.008-|Sample:5.33|
EPOCH[600/1000] loss0.008-|Sample:5.14|
[TEST]
{'precision': array([0.05397213]), 'recall': array([0.17595947]), 'ndcg': array([0.15052018])}
EPOCH[601/1000] loss0.008-|Sample:5.12|
EPOCH[602/1000] loss0.008-|Sample:5.11|
EPOCH[603/1000] loss0.008-|Sample:5.34|
EPOCH[604/1000] loss0.008-|Sample:5.47|
EPOCH[605/1000] loss0.008-|Sample:5.16|
EPOCH[606/1000] loss0.008-|Sample:5.11|
EPOCH[607/1000] loss0.008-|Sample:5.39|
EPOCH[608/1000] loss0.008-|Sample:5.45|
EPOCH[609/1000] loss0.008-|Sample:5.26|
EPOCH[610/1000] loss0.008-|Sample:5.09|
[TEST]
{'precision': array([0.05405921]), 'recall': array([0.17622291]), 'ndcg': array([0.15060454])}
EPOCH[611/1000] loss0.008-|Sample:5.22|
EPOCH[612/1000] loss0.008-|Sample:5.14|
EPOCH[613/1000] loss0.008-|Sample:5.33|
EPOCH[614/1000] loss0.008-|Sample:5.08|
EPOCH[615/1000] loss0.008-|Sample:5.12|
EPOCH[616/1000] loss0.008-|Sample:5.03|
EPOCH[617/1000] loss0.008-|Sample:5.25|
EPOCH[618/1000] loss0.008-|Sample:5.16|
EPOCH[619/1000] loss0.008-|Sample:5.31|
EPOCH[620/1000] loss0.008-|Sample:5.28|
[TEST]
{'precision': array([0.05404749]), 'recall': array([0.17622037]), 'ndcg': array([0.15038469])}
EPOCH[621/1000] loss0.008-|Sample:5.19|
EPOCH[622/1000] loss0.008-|Sample:5.12|
EPOCH[623/1000] loss0.008-|Sample:5.16|
EPOCH[624/1000] loss0.008-|Sample:5.08|
EPOCH[625/1000] loss0.008-|Sample:5.20|
EPOCH[626/1000] loss0.008-|Sample:5.14|
EPOCH[627/1000] loss0.008-|Sample:5.33|
EPOCH[628/1000] loss0.008-|Sample:5.17|
EPOCH[629/1000] loss0.008-|Sample:5.30|
EPOCH[630/1000] loss0.008-|Sample:5.16|
[TEST]
{'precision': array([0.05401735]), 'recall': array([0.17587077]), 'ndcg': array([0.15030759])}
EPOCH[631/1000] loss0.008-|Sample:5.09|
EPOCH[632/1000] loss0.008-|Sample:5.22|
EPOCH[633/1000] loss0.008-|Sample:5.39|
EPOCH[634/1000] loss0.008-|Sample:5.19|
EPOCH[635/1000] loss0.008-|Sample:5.61|
EPOCH[636/1000] loss0.008-|Sample:5.22|
EPOCH[637/1000] loss0.008-|Sample:5.30|
EPOCH[638/1000] loss0.008-|Sample:5.30|
EPOCH[639/1000] loss0.008-|Sample:5.16|
EPOCH[640/1000] loss0.008-|Sample:5.22|
[TEST]
{'precision': array([0.05413457]), 'recall': array([0.17628135]), 'ndcg': array([0.1505376])}
EPOCH[641/1000] loss0.008-|Sample:5.28|
EPOCH[642/1000] loss0.008-|Sample:5.05|
EPOCH[643/1000] loss0.008-|Sample:5.47|
EPOCH[644/1000] loss0.008-|Sample:5.53|
EPOCH[645/1000] loss0.008-|Sample:5.44|
EPOCH[646/1000] loss0.008-|Sample:5.14|
EPOCH[647/1000] loss0.008-|Sample:5.22|
EPOCH[648/1000] loss0.008-|Sample:5.11|
EPOCH[649/1000] loss0.008-|Sample:5.12|
EPOCH[650/1000] loss0.008-|Sample:5.55|
[TEST]
{'precision': array([0.05419653]), 'recall': array([0.17651995]), 'ndcg': array([0.15069299])}
EPOCH[651/1000] loss0.008-|Sample:5.23|
EPOCH[652/1000] loss0.008-|Sample:5.19|
EPOCH[653/1000] loss0.008-|Sample:5.20|
EPOCH[654/1000] loss0.008-|Sample:5.20|
EPOCH[655/1000] loss0.008-|Sample:5.17|
EPOCH[656/1000] loss0.008-|Sample:5.14|
EPOCH[657/1000] loss0.008-|Sample:5.33|
EPOCH[658/1000] loss0.008-|Sample:5.22|
EPOCH[659/1000] loss0.008-|Sample:5.12|
EPOCH[660/1000] loss0.008-|Sample:5.23|
[TEST]
{'precision': array([0.05409605]), 'recall': array([0.17594372]), 'ndcg': array([0.15040663])}
EPOCH[661/1000] loss0.008-|Sample:5.12|
EPOCH[662/1000] loss0.008-|Sample:5.01|
EPOCH[663/1000] loss0.008-|Sample:5.22|
EPOCH[664/1000] loss0.008-|Sample:5.11|
EPOCH[665/1000] loss0.008-|Sample:5.26|
EPOCH[666/1000] loss0.008-|Sample:5.37|
EPOCH[667/1000] loss0.008-|Sample:5.28|
EPOCH[668/1000] loss0.008-|Sample:5.19|
EPOCH[669/1000] loss0.008-|Sample:5.17|
EPOCH[670/1000] loss0.008-|Sample:5.40|
[TEST]
{'precision': array([0.05416639]), 'recall': array([0.17643488]), 'ndcg': array([0.15063537])}
EPOCH[671/1000] loss0.008-|Sample:5.06|
EPOCH[672/1000] loss0.008-|Sample:5.14|
EPOCH[673/1000] loss0.008-|Sample:5.40|
EPOCH[674/1000] loss0.008-|Sample:5.31|
EPOCH[675/1000] loss0.008-|Sample:5.17|
EPOCH[676/1000] loss0.008-|Sample:5.17|
EPOCH[677/1000] loss0.008-|Sample:5.30|
EPOCH[678/1000] loss0.008-|Sample:5.31|
EPOCH[679/1000] loss0.008-|Sample:5.06|
EPOCH[680/1000] loss0.008-|Sample:5.11|
[TEST]
{'precision': array([0.05425682]), 'recall': array([0.17674698]), 'ndcg': array([0.15072112])}
EPOCH[681/1000] loss0.008-|Sample:4.67|
EPOCH[682/1000] loss0.008-|Sample:5.11|
EPOCH[683/1000] loss0.008-|Sample:5.09|
EPOCH[684/1000] loss0.008-|Sample:6.05|
EPOCH[685/1000] loss0.008-|Sample:5.05|
EPOCH[686/1000] loss0.008-|Sample:4.87|
EPOCH[687/1000] loss0.008-|Sample:4.70|
EPOCH[688/1000] loss0.008-|Sample:5.01|
EPOCH[689/1000] loss0.008-|Sample:4.97|
EPOCH[690/1000] loss0.008-|Sample:5.08|
[TEST]
{'precision': array([0.05413457]), 'recall': array([0.17629949]), 'ndcg': array([0.15032906])}
EPOCH[691/1000] loss0.008-|Sample:4.86|
EPOCH[692/1000] loss0.008-|Sample:5.40|
EPOCH[693/1000] loss0.008-|Sample:5.09|
EPOCH[694/1000] loss0.008-|Sample:4.94|
EPOCH[695/1000] loss0.008-|Sample:4.80|
EPOCH[696/1000] loss0.008-|Sample:5.05|
EPOCH[697/1000] loss0.008-|Sample:5.05|
EPOCH[698/1000] loss0.008-|Sample:4.86|
EPOCH[699/1000] loss0.008-|Sample:4.72|
EPOCH[700/1000] loss0.008-|Sample:5.03|
[TEST]
{'precision': array([0.0540994]), 'recall': array([0.17627852]), 'ndcg': array([0.15074724])}
EPOCH[701/1000] loss0.008-|Sample:5.08|
EPOCH[702/1000] loss0.008-|Sample:4.75|
EPOCH[703/1000] loss0.008-|Sample:4.86|
EPOCH[704/1000] loss0.008-|Sample:5.08|
EPOCH[705/1000] loss0.008-|Sample:4.98|
EPOCH[706/1000] loss0.008-|Sample:4.70|
EPOCH[707/1000] loss0.008-|Sample:5.17|
EPOCH[708/1000] loss0.008-|Sample:5.05|
EPOCH[709/1000] loss0.008-|Sample:5.05|
EPOCH[710/1000] loss0.008-|Sample:4.78|
[TEST]
{'precision': array([0.05417978]), 'recall': array([0.17656599]), 'ndcg': array([0.15063753])}
EPOCH[711/1000] loss0.008-|Sample:5.05|
EPOCH[712/1000] loss0.008-|Sample:5.01|
EPOCH[713/1000] loss0.008-|Sample:5.06|
EPOCH[714/1000] loss0.008-|Sample:4.62|
EPOCH[715/1000] loss0.008-|Sample:5.06|
EPOCH[716/1000] loss0.008-|Sample:5.03|
EPOCH[717/1000] loss0.008-|Sample:5.06|
EPOCH[718/1000] loss0.008-|Sample:4.73|
EPOCH[719/1000] loss0.008-|Sample:5.06|
EPOCH[720/1000] loss0.008-|Sample:4.97|
[TEST]
{'precision': array([0.05415969]), 'recall': array([0.17648888]), 'ndcg': array([0.15053003])}
EPOCH[721/1000] loss0.008-|Sample:4.92|
EPOCH[722/1000] loss0.008-|Sample:4.66|
EPOCH[723/1000] loss0.008-|Sample:5.09|
EPOCH[724/1000] loss0.008-|Sample:4.94|
EPOCH[725/1000] loss0.008-|Sample:5.06|
EPOCH[726/1000] loss0.008-|Sample:4.89|
EPOCH[727/1000] loss0.008-|Sample:4.58|
EPOCH[728/1000] loss0.008-|Sample:4.87|
EPOCH[729/1000] loss0.008-|Sample:5.01|
EPOCH[730/1000] loss0.008-|Sample:5.03|
[TEST]
{'precision': array([0.05421663]), 'recall': array([0.17674319]), 'ndcg': array([0.15036555])}
EPOCH[731/1000] loss0.008-|Sample:4.69|
EPOCH[732/1000] loss0.008-|Sample:5.03|
EPOCH[733/1000] loss0.008-|Sample:5.03|
EPOCH[734/1000] loss0.008-|Sample:5.01|
EPOCH[735/1000] loss0.008-|Sample:4.80|
EPOCH[736/1000] loss0.008-|Sample:4.97|
EPOCH[737/1000] loss0.008-|Sample:5.05|
EPOCH[738/1000] loss0.008-|Sample:5.03|
EPOCH[739/1000] loss0.008-|Sample:4.72|
EPOCH[740/1000] loss0.008-|Sample:5.01|
[TEST]
{'precision': array([0.05417309]), 'recall': array([0.17673636]), 'ndcg': array([0.15065254])}
EPOCH[741/1000] loss0.008-|Sample:4.98|
EPOCH[742/1000] loss0.008-|Sample:4.86|
EPOCH[743/1000] loss0.008-|Sample:4.78|
EPOCH[744/1000] loss0.008-|Sample:5.01|
EPOCH[745/1000] loss0.008-|Sample:4.97|
EPOCH[746/1000] loss0.008-|Sample:4.87|
EPOCH[747/1000] loss0.008-|Sample:4.75|
EPOCH[748/1000] loss0.008-|Sample:4.97|
EPOCH[749/1000] loss0.008-|Sample:4.95|
EPOCH[750/1000] loss0.008-|Sample:5.01|
[TEST]
{'precision': array([0.0545348]), 'recall': array([0.17794601]), 'ndcg': array([0.15108859])}
EPOCH[751/1000] loss0.008-|Sample:5.11|
EPOCH[752/1000] loss0.008-|Sample:5.01|
EPOCH[753/1000] loss0.008-|Sample:4.95|
EPOCH[754/1000] loss0.008-|Sample:4.73|
EPOCH[755/1000] loss0.008-|Sample:5.03|
EPOCH[756/1000] loss0.008-|Sample:5.00|
EPOCH[757/1000] loss0.008-|Sample:5.06|
EPOCH[758/1000] loss0.008-|Sample:4.78|
EPOCH[759/1000] loss0.008-|Sample:4.97|
EPOCH[760/1000] loss0.008-|Sample:5.08|
[TEST]
{'precision': array([0.05437906]), 'recall': array([0.17751159]), 'ndcg': array([0.15074877])}
EPOCH[761/1000] loss0.008-|Sample:5.01|
EPOCH[762/1000] loss0.008-|Sample:4.66|
EPOCH[763/1000] loss0.008-|Sample:5.03|
EPOCH[764/1000] loss0.008-|Sample:5.20|
EPOCH[765/1000] loss0.008-|Sample:5.03|
EPOCH[766/1000] loss0.008-|Sample:5.05|
EPOCH[767/1000] loss0.008-|Sample:4.72|
EPOCH[768/1000] loss0.008-|Sample:4.75|
EPOCH[769/1000] loss0.008-|Sample:5.06|
EPOCH[770/1000] loss0.008-|Sample:4.95|
[TEST]
{'precision': array([0.05408768]), 'recall': array([0.17677614]), 'ndcg': array([0.15045019])}
EPOCH[771/1000] loss0.008-|Sample:4.75|
EPOCH[772/1000] loss0.008-|Sample:4.94|
EPOCH[773/1000] loss0.008-|Sample:5.09|
EPOCH[774/1000] loss0.008-|Sample:4.98|
EPOCH[775/1000] loss0.008-|Sample:4.73|
EPOCH[776/1000] loss0.008-|Sample:5.06|
EPOCH[777/1000] loss0.008-|Sample:5.03|
EPOCH[778/1000] loss0.008-|Sample:5.05|
EPOCH[779/1000] loss0.008-|Sample:4.72|
EPOCH[780/1000] loss0.008-|Sample:5.03|
[TEST]
{'precision': array([0.05414797]), 'recall': array([0.17650536]), 'ndcg': array([0.15061358])}
EPOCH[781/1000] loss0.008-|Sample:4.97|
EPOCH[782/1000] loss0.008-|Sample:5.05|
EPOCH[783/1000] loss0.008-|Sample:4.66|
EPOCH[784/1000] loss0.008-|Sample:4.98|
EPOCH[785/1000] loss0.008-|Sample:5.01|
EPOCH[786/1000] loss0.008-|Sample:4.98|
EPOCH[787/1000] loss0.008-|Sample:4.66|
EPOCH[788/1000] loss0.008-|Sample:5.03|
EPOCH[789/1000] loss0.008-|Sample:5.00|
EPOCH[790/1000] loss0.008-|Sample:5.06|
[TEST]
{'precision': array([0.05428696]), 'recall': array([0.17697928]), 'ndcg': array([0.15120222])}
EPOCH[791/1000] loss0.008-|Sample:4.86|
EPOCH[792/1000] loss0.008-|Sample:5.05|
EPOCH[793/1000] loss0.008-|Sample:4.92|
EPOCH[794/1000] loss0.008-|Sample:4.89|
EPOCH[795/1000] loss0.008-|Sample:4.69|
EPOCH[796/1000] loss0.008-|Sample:5.05|
EPOCH[797/1000] loss0.008-|Sample:4.98|
EPOCH[798/1000] loss0.008-|Sample:4.94|
EPOCH[799/1000] loss0.008-|Sample:4.64|
EPOCH[800/1000] loss0.008-|Sample:5.06|
[TEST]
{'precision': array([0.05432547]), 'recall': array([0.17686921]), 'ndcg': array([0.15092956])}
EPOCH[801/1000] loss0.008-|Sample:5.11|
EPOCH[802/1000] loss0.008-|Sample:4.72|
EPOCH[803/1000] loss0.008-|Sample:5.03|
EPOCH[804/1000] loss0.008-|Sample:5.05|
EPOCH[805/1000] loss0.008-|Sample:5.00|
EPOCH[806/1000] loss0.008-|Sample:4.98|
EPOCH[807/1000] loss0.008-|Sample:5.14|
EPOCH[808/1000] loss0.008-|Sample:4.84|
EPOCH[809/1000] loss0.008-|Sample:5.08|
EPOCH[810/1000] loss0.008-|Sample:5.06|
[TEST]
{'precision': array([0.0543372]), 'recall': array([0.17738264]), 'ndcg': array([0.15093221])}
EPOCH[811/1000] loss0.008-|Sample:4.78|
EPOCH[812/1000] loss0.008-|Sample:4.89|
EPOCH[813/1000] loss0.008-|Sample:4.97|
EPOCH[814/1000] loss0.008-|Sample:5.16|
EPOCH[815/1000] loss0.008-|Sample:4.70|
EPOCH[816/1000] loss0.008-|Sample:4.91|
EPOCH[817/1000] loss0.008-|Sample:5.06|
EPOCH[818/1000] loss0.008-|Sample:4.97|
EPOCH[819/1000] loss0.008-|Sample:4.80|
EPOCH[820/1000] loss0.008-|Sample:4.83|
[TEST]
{'precision': array([0.05432715]), 'recall': array([0.17697243]), 'ndcg': array([0.15116012])}
EPOCH[821/1000] loss0.008-|Sample:5.00|
EPOCH[822/1000] loss0.008-|Sample:4.98|
EPOCH[823/1000] loss0.008-|Sample:4.73|
EPOCH[824/1000] loss0.008-|Sample:4.95|
EPOCH[825/1000] loss0.008-|Sample:5.03|
EPOCH[826/1000] loss0.008-|Sample:4.98|
EPOCH[827/1000] loss0.008-|Sample:4.69|
EPOCH[828/1000] loss0.008-|Sample:5.01|
EPOCH[829/1000] loss0.008-|Sample:5.06|
EPOCH[830/1000] loss0.008-|Sample:4.92|
[TEST]
{'precision': array([0.0544159]), 'recall': array([0.17738956]), 'ndcg': array([0.1508702])}
EPOCH[831/1000] loss0.008-|Sample:4.67|
EPOCH[832/1000] loss0.008-|Sample:5.00|
EPOCH[833/1000] loss0.008-|Sample:4.97|
EPOCH[834/1000] loss0.008-|Sample:4.98|
EPOCH[835/1000] loss0.008-|Sample:4.86|
EPOCH[836/1000] loss0.008-|Sample:5.09|
EPOCH[837/1000] loss0.008-|Sample:4.98|
EPOCH[838/1000] loss0.008-|Sample:5.00|
EPOCH[839/1000] loss0.008-|Sample:4.69|
EPOCH[840/1000] loss0.008-|Sample:5.06|
[TEST]
{'precision': array([0.05436064]), 'recall': array([0.17685445]), 'ndcg': array([0.15051817])}
EPOCH[841/1000] loss0.008-|Sample:5.03|
EPOCH[842/1000] loss0.008-|Sample:4.76|
EPOCH[843/1000] loss0.008-|Sample:5.05|
EPOCH[844/1000] loss0.008-|Sample:5.01|
EPOCH[845/1000] loss0.008-|Sample:5.05|
EPOCH[846/1000] loss0.008-|Sample:4.91|
EPOCH[847/1000] loss0.008-|Sample:5.00|
EPOCH[848/1000] loss0.008-|Sample:4.78|
EPOCH[849/1000] loss0.008-|Sample:4.98|
EPOCH[850/1000] loss0.008-|Sample:5.09|
[TEST]
{'precision': array([0.05446279]), 'recall': array([0.1772867]), 'ndcg': array([0.15082539])}
EPOCH[851/1000] loss0.008-|Sample:4.92|
EPOCH[852/1000] loss0.008-|Sample:4.70|
EPOCH[853/1000] loss0.008-|Sample:5.00|
EPOCH[854/1000] loss0.008-|Sample:5.17|
EPOCH[855/1000] loss0.008-|Sample:4.76|
EPOCH[856/1000] loss0.008-|Sample:4.70|
EPOCH[857/1000] loss0.008-|Sample:5.01|
EPOCH[858/1000] loss0.008-|Sample:4.98|
EPOCH[859/1000] loss0.008-|Sample:5.03|
EPOCH[860/1000] loss0.008-|Sample:4.83|
[TEST]
{'precision': array([0.05439246]), 'recall': array([0.17702251]), 'ndcg': array([0.15114689])}
EPOCH[861/1000] loss0.008-|Sample:5.05|
EPOCH[862/1000] loss0.008-|Sample:4.92|
EPOCH[863/1000] loss0.008-|Sample:4.76|
EPOCH[864/1000] loss0.008-|Sample:5.05|
EPOCH[865/1000] loss0.008-|Sample:5.11|
EPOCH[866/1000] loss0.008-|Sample:4.97|
EPOCH[867/1000] loss0.008-|Sample:4.75|
EPOCH[868/1000] loss0.008-|Sample:4.97|
EPOCH[869/1000] loss0.008-|Sample:5.16|
EPOCH[870/1000] loss0.008-|Sample:5.08|
[TEST]
{'precision': array([0.05439581]), 'recall': array([0.17729366]), 'ndcg': array([0.15133455])}
EPOCH[871/1000] loss0.008-|Sample:5.11|
EPOCH[872/1000] loss0.008-|Sample:4.96|
EPOCH[873/1000] loss0.008-|Sample:5.00|
EPOCH[874/1000] loss0.008-|Sample:5.00|
EPOCH[875/1000] loss0.008-|Sample:4.70|
EPOCH[876/1000] loss0.008-|Sample:5.06|
EPOCH[877/1000] loss0.008-|Sample:5.11|
EPOCH[878/1000] loss0.008-|Sample:5.17|
EPOCH[879/1000] loss0.008-|Sample:4.87|
EPOCH[880/1000] loss0.008-|Sample:5.16|
[TEST]
{'precision': array([0.054436]), 'recall': array([0.17729664]), 'ndcg': array([0.15128433])}
EPOCH[881/1000] loss0.008-|Sample:4.89|
EPOCH[882/1000] loss0.008-|Sample:4.87|
EPOCH[883/1000] loss0.008-|Sample:4.63|
EPOCH[884/1000] loss0.008-|Sample:4.95|
EPOCH[885/1000] loss0.008-|Sample:5.02|
EPOCH[886/1000] loss0.008-|Sample:5.04|
EPOCH[887/1000] loss0.008-|Sample:4.79|
EPOCH[888/1000] loss0.008-|Sample:4.71|
EPOCH[889/1000] loss0.008-|Sample:5.06|
EPOCH[890/1000] loss0.008-|Sample:4.93|
[TEST]
{'precision': array([0.05439246]), 'recall': array([0.17686862]), 'ndcg': array([0.15119235])}
EPOCH[891/1000] loss0.008-|Sample:5.00|
EPOCH[892/1000] loss0.008-|Sample:4.70|
EPOCH[893/1000] loss0.008-|Sample:5.00|
EPOCH[894/1000] loss0.008-|Sample:5.29|
EPOCH[895/1000] loss0.008-|Sample:5.06|
EPOCH[896/1000] loss0.008-|Sample:4.69|
EPOCH[897/1000] loss0.008-|Sample:4.89|
EPOCH[898/1000] loss0.008-|Sample:5.48|
EPOCH[899/1000] loss0.008-|Sample:4.86|
EPOCH[900/1000] loss0.008-|Sample:4.63|
[TEST]
{'precision': array([0.05450466]), 'recall': array([0.17736487]), 'ndcg': array([0.15145577])}
EPOCH[901/1000] loss0.008-|Sample:4.87|
EPOCH[902/1000] loss0.008-|Sample:4.91|
EPOCH[903/1000] loss0.008-|Sample:5.20|
EPOCH[904/1000] loss0.008-|Sample:4.66|
EPOCH[905/1000] loss0.008-|Sample:5.31|
EPOCH[906/1000] loss0.008-|Sample:4.86|
EPOCH[907/1000] loss0.008-|Sample:4.94|
EPOCH[908/1000] loss0.008-|Sample:4.63|
EPOCH[909/1000] loss0.008-|Sample:4.98|
EPOCH[910/1000] loss0.008-|Sample:5.17|
[TEST]
{'precision': array([0.05426351]), 'recall': array([0.17680131]), 'ndcg': array([0.15084906])}
EPOCH[911/1000] loss0.008-|Sample:4.72|
EPOCH[912/1000] loss0.008-|Sample:4.84|
EPOCH[913/1000] loss0.008-|Sample:5.14|
EPOCH[914/1000] loss0.008-|Sample:5.33|
EPOCH[915/1000] loss0.008-|Sample:4.66|
EPOCH[916/1000] loss0.008-|Sample:4.84|
EPOCH[917/1000] loss0.008-|Sample:5.50|
EPOCH[918/1000] loss0.008-|Sample:5.17|
EPOCH[919/1000] loss0.008-|Sample:4.64|
EPOCH[920/1000] loss0.008-|Sample:4.83|
[TEST]
{'precision': array([0.05456996]), 'recall': array([0.17746077]), 'ndcg': array([0.1515852])}
EPOCH[921/1000] loss0.008-|Sample:5.45|
EPOCH[922/1000] loss0.008-|Sample:4.87|
EPOCH[923/1000] loss0.008-|Sample:4.62|
EPOCH[924/1000] loss0.008-|Sample:4.87|
EPOCH[925/1000] loss0.008-|Sample:4.97|
EPOCH[926/1000] loss0.008-|Sample:4.89|
EPOCH[927/1000] loss0.008-|Sample:4.91|
EPOCH[928/1000] loss0.008-|Sample:4.70|
EPOCH[929/1000] loss0.008-|Sample:4.59|
EPOCH[930/1000] loss0.008-|Sample:5.08|
[TEST]
{'precision': array([0.05447451]), 'recall': array([0.17703857]), 'ndcg': array([0.15118281])}
EPOCH[931/1000] loss0.008-|Sample:4.83|
EPOCH[932/1000] loss0.008-|Sample:4.67|
EPOCH[933/1000] loss0.008-|Sample:5.39|
EPOCH[934/1000] loss0.008-|Sample:5.00|
EPOCH[935/1000] loss0.008-|Sample:5.44|
EPOCH[936/1000] loss0.008-|Sample:4.61|
EPOCH[937/1000] loss0.008-|Sample:4.94|
EPOCH[938/1000] loss0.008-|Sample:5.09|
EPOCH[939/1000] loss0.008-|Sample:4.89|
EPOCH[940/1000] loss0.008-|Sample:4.64|
[TEST]
{'precision': array([0.05446614]), 'recall': array([0.17742004]), 'ndcg': array([0.15075851])}
EPOCH[941/1000] loss0.008-|Sample:4.84|
EPOCH[942/1000] loss0.008-|Sample:4.92|
EPOCH[943/1000] loss0.008-|Sample:4.89|
EPOCH[944/1000] loss0.008-|Sample:4.59|
EPOCH[945/1000] loss0.008-|Sample:4.87|
EPOCH[946/1000] loss0.008-|Sample:5.44|
EPOCH[947/1000] loss0.008-|Sample:4.87|
EPOCH[948/1000] loss0.008-|Sample:4.64|
EPOCH[949/1000] loss0.008-|Sample:4.87|
EPOCH[950/1000] loss0.008-|Sample:4.92|
[TEST]
{'precision': array([0.05450633]), 'recall': array([0.17794952]), 'ndcg': array([0.15127121])}
EPOCH[951/1000] loss0.008-|Sample:4.87|
EPOCH[952/1000] loss0.008-|Sample:4.62|
EPOCH[953/1000] loss0.008-|Sample:4.86|
EPOCH[954/1000] loss0.008-|Sample:4.89|
EPOCH[955/1000] loss0.008-|Sample:5.44|
EPOCH[956/1000] loss0.008-|Sample:4.61|
EPOCH[957/1000] loss0.008-|Sample:4.87|
EPOCH[958/1000] loss0.008-|Sample:4.87|
EPOCH[959/1000] loss0.008-|Sample:4.86|
EPOCH[960/1000] loss0.008-|Sample:4.62|
[TEST]
{'precision': array([0.05437739]), 'recall': array([0.17728081]), 'ndcg': array([0.15084458])}
EPOCH[961/1000] loss0.008-|Sample:4.87|
EPOCH[962/1000] loss0.008-|Sample:4.76|
EPOCH[963/1000] loss0.008-|Sample:4.95|
EPOCH[964/1000] loss0.008-|Sample:4.56|
EPOCH[965/1000] loss0.008-|Sample:4.87|
EPOCH[966/1000] loss0.008-|Sample:4.86|
EPOCH[967/1000] loss0.008-|Sample:4.89|
EPOCH[968/1000] loss0.008-|Sample:4.84|
EPOCH[969/1000] loss0.008-|Sample:4.69|
EPOCH[970/1000] loss0.008-|Sample:4.69|
[TEST]
{'precision': array([0.05431208]), 'recall': array([0.17744449]), 'ndcg': array([0.15111033])}
EPOCH[971/1000] loss0.008-|Sample:4.94|
EPOCH[972/1000] loss0.008-|Sample:5.37|
EPOCH[973/1000] loss0.008-|Sample:4.70|
EPOCH[974/1000] loss0.008-|Sample:4.87|
EPOCH[975/1000] loss0.008-|Sample:4.98|
EPOCH[976/1000] loss0.008-|Sample:4.86|
EPOCH[977/1000] loss0.008-|Sample:4.75|
EPOCH[978/1000] loss0.008-|Sample:5.30|
EPOCH[979/1000] loss0.008-|Sample:4.87|
EPOCH[980/1000] loss0.008-|Sample:5.12|
[TEST]
{'precision': array([0.05418816]), 'recall': array([0.17666148]), 'ndcg': array([0.15069579])}
EPOCH[981/1000] loss0.008-|Sample:4.51|
EPOCH[982/1000] loss0.008-|Sample:4.98|
EPOCH[983/1000] loss0.008-|Sample:4.95|
EPOCH[984/1000] loss0.008-|Sample:4.87|
EPOCH[985/1000] loss0.008-|Sample:4.62|
EPOCH[986/1000] loss0.008-|Sample:4.87|
EPOCH[987/1000] loss0.008-|Sample:4.83|
EPOCH[988/1000] loss0.008-|Sample:4.92|
EPOCH[989/1000] loss0.008-|Sample:4.66|
EPOCH[990/1000] loss0.008-|Sample:4.91|
[TEST]
{'precision': array([0.05414462]), 'recall': array([0.17665427]), 'ndcg': array([0.15076564])}
EPOCH[991/1000] loss0.008-|Sample:4.81|
EPOCH[992/1000] loss0.008-|Sample:4.78|
EPOCH[993/1000] loss0.008-|Sample:4.64|
EPOCH[994/1000] loss0.008-|Sample:4.91|
EPOCH[995/1000] loss0.008-|Sample:4.98|
EPOCH[996/1000] loss0.008-|Sample:4.80|
EPOCH[997/1000] loss0.008-|Sample:4.58|
EPOCH[998/1000] loss0.008-|Sample:5.01|
EPOCH[999/1000] loss0.008-|Sample:5.01|
EPOCH[1000/1000] loss0.008-|Sample:4.89|

Process finished with exit code 0


model:MF layers:2
D:\ProgramFiles\Anaconda3\envs\image_caption_python36\python.exe D:/workspace/LightGcn/LightGCN-PyTorch-master/code/main.py
Cpp extension not loaded
>>SEED: 2020
loading [../data/gowalla]
810128 interactions for training
217242 interactions for testing
gowalla Sparsity : 0.0008396216228570436
gowalla is ready to go
===========config================
{'A_n_fold': 100,
 'A_split': False,
 'bigdata': False,
 'bpr_batch_size': 2048,
 'decay': 0.0001,
 'dropout': 0,
 'keep_prob': 0.6,
 'latent_dim_rec': 64,
 'lightGCN_n_layers': 2,
 'lr': 0.001,
 'multicore': 0,
 'pretrain': 0,
 'test_u_batch_size': 100}
cores for test: 6
comment: lgn
tensorboard: 1
LOAD: 0
Weight path: ./checkpoints
Test Topks: [20]
using bpr loss
===========end===================
using Normal distribution N(0,1) initialization for PureMF
load and save to /home/qhc/下载/LightGCN-PyTorch-master\code\checkpoints\mf-gowalla-64.pth.tar
[TEST]
{'precision': array([0.00057271]), 'recall': array([0.00147738]), 'ndcg': array([0.0009998])}
EPOCH[1/1000] loss4.420-|Sample:5.70|
EPOCH[2/1000] loss4.113-|Sample:5.11|
EPOCH[3/1000] loss3.826-|Sample:5.06|
EPOCH[4/1000] loss3.575-|Sample:4.97|
EPOCH[5/1000] loss3.328-|Sample:5.34|
EPOCH[6/1000] loss3.115-|Sample:5.05|
EPOCH[7/1000] loss2.909-|Sample:5.03|
EPOCH[8/1000] loss2.723-|Sample:4.98|
EPOCH[9/1000] loss2.557-|Sample:5.03|
EPOCH[10/1000] loss2.410-|Sample:4.98|
[TEST]
{'precision': array([0.00037343]), 'recall': array([0.00100581]), 'ndcg': array([0.00064691])}
EPOCH[11/1000] loss2.253-|Sample:5.16|
EPOCH[12/1000] loss2.116-|Sample:4.97|
EPOCH[13/1000] loss2.005-|Sample:5.19|
EPOCH[14/1000] loss1.895-|Sample:5.17|
EPOCH[15/1000] loss1.782-|Sample:5.25|
EPOCH[16/1000] loss1.686-|Sample:5.14|
EPOCH[17/1000] loss1.606-|Sample:5.03|
EPOCH[18/1000] loss1.510-|Sample:4.98|
EPOCH[19/1000] loss1.439-|Sample:5.11|
EPOCH[20/1000] loss1.367-|Sample:5.03|
[TEST]
{'precision': array([0.00033324]), 'recall': array([0.00096508]), 'ndcg': array([0.00062291])}
EPOCH[21/1000] loss1.294-|Sample:5.08|
EPOCH[22/1000] loss1.225-|Sample:5.06|
EPOCH[23/1000] loss1.174-|Sample:5.08|
EPOCH[24/1000] loss1.116-|Sample:4.98|
EPOCH[25/1000] loss1.058-|Sample:5.11|
EPOCH[26/1000] loss1.008-|Sample:4.97|
EPOCH[27/1000] loss0.959-|Sample:5.01|
EPOCH[28/1000] loss0.919-|Sample:5.20|
EPOCH[29/1000] loss0.879-|Sample:5.23|
EPOCH[30/1000] loss0.839-|Sample:5.28|
[TEST]
{'precision': array([0.00046386]), 'recall': array([0.00145191]), 'ndcg': array([0.00086185])}
EPOCH[31/1000] loss0.802-|Sample:5.06|
EPOCH[32/1000] loss0.765-|Sample:5.09|
EPOCH[33/1000] loss0.729-|Sample:5.01|
EPOCH[34/1000] loss0.696-|Sample:5.12|
EPOCH[35/1000] loss0.667-|Sample:5.12|
EPOCH[36/1000] loss0.638-|Sample:5.03|
EPOCH[37/1000] loss0.613-|Sample:4.94|
EPOCH[38/1000] loss0.583-|Sample:5.00|
EPOCH[39/1000] loss0.560-|Sample:5.14|
EPOCH[40/1000] loss0.537-|Sample:5.03|
[TEST]
{'precision': array([0.00069496]), 'recall': array([0.00222251]), 'ndcg': array([0.00137102])}
EPOCH[41/1000] loss0.510-|Sample:5.20|
EPOCH[42/1000] loss0.491-|Sample:5.05|
EPOCH[43/1000] loss0.470-|Sample:5.09|
EPOCH[44/1000] loss0.449-|Sample:4.98|
EPOCH[45/1000] loss0.433-|Sample:5.08|
EPOCH[46/1000] loss0.413-|Sample:5.12|
EPOCH[47/1000] loss0.397-|Sample:5.08|
EPOCH[48/1000] loss0.381-|Sample:5.26|
EPOCH[49/1000] loss0.366-|Sample:5.03|
EPOCH[50/1000] loss0.350-|Sample:5.56|
[TEST]
{'precision': array([0.00129446]), 'recall': array([0.00387004]), 'ndcg': array([0.002371])}
EPOCH[51/1000] loss0.332-|Sample:5.00|
EPOCH[52/1000] loss0.323-|Sample:5.09|
EPOCH[53/1000] loss0.309-|Sample:5.05|
EPOCH[54/1000] loss0.297-|Sample:5.12|
EPOCH[55/1000] loss0.285-|Sample:5.06|
EPOCH[56/1000] loss0.275-|Sample:5.03|
EPOCH[57/1000] loss0.261-|Sample:5.50|
EPOCH[58/1000] loss0.254-|Sample:5.00|
EPOCH[59/1000] loss0.244-|Sample:5.50|
EPOCH[60/1000] loss0.234-|Sample:4.94|
[TEST]
{'precision': array([0.00232601]), 'recall': array([0.00619317]), 'ndcg': array([0.00405162])}
EPOCH[61/1000] loss0.227-|Sample:5.14|
EPOCH[62/1000] loss0.218-|Sample:5.14|
EPOCH[63/1000] loss0.209-|Sample:5.12|
EPOCH[64/1000] loss0.203-|Sample:4.94|
EPOCH[65/1000] loss0.195-|Sample:5.30|
EPOCH[66/1000] loss0.187-|Sample:5.11|
EPOCH[67/1000] loss0.180-|Sample:5.12|
EPOCH[68/1000] loss0.175-|Sample:5.05|
EPOCH[69/1000] loss0.170-|Sample:5.59|
EPOCH[70/1000] loss0.162-|Sample:5.08|
[TEST]
{'precision': array([0.0036975]), 'recall': array([0.0088954]), 'ndcg': array([0.00619472])}
EPOCH[71/1000] loss0.156-|Sample:5.06|
EPOCH[72/1000] loss0.151-|Sample:5.08|
EPOCH[73/1000] loss0.146-|Sample:5.06|
EPOCH[74/1000] loss0.142-|Sample:5.11|
EPOCH[75/1000] loss0.137-|Sample:5.00|
EPOCH[76/1000] loss0.133-|Sample:5.19|
EPOCH[77/1000] loss0.126-|Sample:5.16|
EPOCH[78/1000] loss0.125-|Sample:5.31|
EPOCH[79/1000] loss0.121-|Sample:5.17|
EPOCH[80/1000] loss0.117-|Sample:5.00|
[TEST]
{'precision': array([0.00511086]), 'recall': array([0.01128787]), 'ndcg': array([0.00821497])}
EPOCH[81/1000] loss0.112-|Sample:5.06|
EPOCH[82/1000] loss0.110-|Sample:5.25|
EPOCH[83/1000] loss0.107-|Sample:5.39|
EPOCH[84/1000] loss0.103-|Sample:5.16|
EPOCH[85/1000] loss0.101-|Sample:5.06|
EPOCH[86/1000] loss0.097-|Sample:4.98|
EPOCH[87/1000] loss0.095-|Sample:5.25|
EPOCH[88/1000] loss0.092-|Sample:5.20|
EPOCH[89/1000] loss0.090-|Sample:5.17|
EPOCH[90/1000] loss0.087-|Sample:5.03|
[TEST]
{'precision': array([0.00639695]), 'recall': array([0.01348208]), 'ndcg': array([0.01028852])}
EPOCH[91/1000] loss0.084-|Sample:5.01|
EPOCH[92/1000] loss0.082-|Sample:5.01|
EPOCH[93/1000] loss0.080-|Sample:4.97|
EPOCH[94/1000] loss0.078-|Sample:5.14|
EPOCH[95/1000] loss0.076-|Sample:5.12|
EPOCH[96/1000] loss0.074-|Sample:5.25|
EPOCH[97/1000] loss0.073-|Sample:5.09|
EPOCH[98/1000] loss0.070-|Sample:5.03|
EPOCH[99/1000] loss0.069-|Sample:5.31|
EPOCH[100/1000] loss0.066-|Sample:5.31|
[TEST]
{'precision': array([0.00750553]), 'recall': array([0.01542276]), 'ndcg': array([0.01192555])}
EPOCH[101/1000] loss0.065-|Sample:5.14|
EPOCH[102/1000] loss0.065-|Sample:5.00|
EPOCH[103/1000] loss0.062-|Sample:5.44|
EPOCH[104/1000] loss0.061-|Sample:5.30|
EPOCH[105/1000] loss0.059-|Sample:5.22|
EPOCH[106/1000] loss0.059-|Sample:5.12|
EPOCH[107/1000] loss0.057-|Sample:5.08|
EPOCH[108/1000] loss0.056-|Sample:5.16|
EPOCH[109/1000] loss0.055-|Sample:5.03|
EPOCH[110/1000] loss0.053-|Sample:4.98|
[TEST]
{'precision': array([0.00839976]), 'recall': array([0.01718211]), 'ndcg': array([0.01334478])}
EPOCH[111/1000] loss0.053-|Sample:5.23|
EPOCH[112/1000] loss0.051-|Sample:5.00|
EPOCH[113/1000] loss0.051-|Sample:5.31|
EPOCH[114/1000] loss0.049-|Sample:5.11|
EPOCH[115/1000] loss0.049-|Sample:5.05|
EPOCH[116/1000] loss0.047-|Sample:5.05|
EPOCH[117/1000] loss0.046-|Sample:5.34|
EPOCH[118/1000] loss0.046-|Sample:5.05|
EPOCH[119/1000] loss0.045-|Sample:5.06|
EPOCH[120/1000] loss0.045-|Sample:5.06|
[TEST]
{'precision': array([0.00934925]), 'recall': array([0.01902451]), 'ndcg': array([0.01486679])}
EPOCH[121/1000] loss0.043-|Sample:5.12|
EPOCH[122/1000] loss0.043-|Sample:5.26|
EPOCH[123/1000] loss0.042-|Sample:5.22|
EPOCH[124/1000] loss0.041-|Sample:5.08|
EPOCH[125/1000] loss0.041-|Sample:5.41|
EPOCH[126/1000] loss0.040-|Sample:5.30|
EPOCH[127/1000] loss0.039-|Sample:5.05|
EPOCH[128/1000] loss0.039-|Sample:5.31|
EPOCH[129/1000] loss0.038-|Sample:5.11|
EPOCH[130/1000] loss0.038-|Sample:5.14|
[TEST]
{'precision': array([0.01008272]), 'recall': array([0.0205122]), 'ndcg': array([0.01596699])}
EPOCH[131/1000] loss0.036-|Sample:4.92|
EPOCH[132/1000] loss0.035-|Sample:5.14|
EPOCH[133/1000] loss0.035-|Sample:4.98|
EPOCH[134/1000] loss0.035-|Sample:4.97|
EPOCH[135/1000] loss0.034-|Sample:5.19|
EPOCH[136/1000] loss0.034-|Sample:5.23|
EPOCH[137/1000] loss0.033-|Sample:5.23|
EPOCH[138/1000] loss0.033-|Sample:5.14|
EPOCH[139/1000] loss0.032-|Sample:5.22|
EPOCH[140/1000] loss0.032-|Sample:5.08|
[TEST]
{'precision': array([0.01070735]), 'recall': array([0.02190397]), 'ndcg': array([0.01701165])}
EPOCH[141/1000] loss0.032-|Sample:5.00|
EPOCH[142/1000] loss0.031-|Sample:5.06|
EPOCH[143/1000] loss0.031-|Sample:5.34|
EPOCH[144/1000] loss0.030-|Sample:5.08|
EPOCH[145/1000] loss0.030-|Sample:5.08|
EPOCH[146/1000] loss0.030-|Sample:5.48|
EPOCH[147/1000] loss0.030-|Sample:5.09|
EPOCH[148/1000] loss0.029-|Sample:5.00|
EPOCH[149/1000] loss0.029-|Sample:5.28|
EPOCH[150/1000] loss0.028-|Sample:5.00|
[TEST]
{'precision': array([0.01135039]), 'recall': array([0.02344129]), 'ndcg': array([0.01809336])}
EPOCH[151/1000] loss0.027-|Sample:5.00|
EPOCH[152/1000] loss0.027-|Sample:5.06|
EPOCH[153/1000] loss0.027-|Sample:5.23|
EPOCH[154/1000] loss0.027-|Sample:5.30|
EPOCH[155/1000] loss0.027-|Sample:5.44|
EPOCH[156/1000] loss0.026-|Sample:5.16|
EPOCH[157/1000] loss0.027-|Sample:5.22|
EPOCH[158/1000] loss0.026-|Sample:5.36|
EPOCH[159/1000] loss0.026-|Sample:5.08|
EPOCH[160/1000] loss0.025-|Sample:4.95|
[TEST]
{'precision': array([0.01190971]), 'recall': array([0.02485327]), 'ndcg': array([0.01916341])}
EPOCH[161/1000] loss0.025-|Sample:4.91|
EPOCH[162/1000] loss0.025-|Sample:5.47|
EPOCH[163/1000] loss0.024-|Sample:5.08|
EPOCH[164/1000] loss0.024-|Sample:5.03|
EPOCH[165/1000] loss0.024-|Sample:5.08|
EPOCH[166/1000] loss0.024-|Sample:5.55|
EPOCH[167/1000] loss0.023-|Sample:5.26|
EPOCH[168/1000] loss0.023-|Sample:5.12|
EPOCH[169/1000] loss0.022-|Sample:5.05|
EPOCH[170/1000] loss0.023-|Sample:5.08|
[TEST]
{'precision': array([0.01247572]), 'recall': array([0.02646195]), 'ndcg': array([0.02025839])}
EPOCH[171/1000] loss0.023-|Sample:5.20|
EPOCH[172/1000] loss0.022-|Sample:5.08|
EPOCH[173/1000] loss0.023-|Sample:5.11|
EPOCH[174/1000] loss0.022-|Sample:5.06|
EPOCH[175/1000] loss0.022-|Sample:5.09|
EPOCH[176/1000] loss0.022-|Sample:5.09|
EPOCH[177/1000] loss0.021-|Sample:5.26|
EPOCH[178/1000] loss0.021-|Sample:5.08|
EPOCH[179/1000] loss0.021-|Sample:5.09|
EPOCH[180/1000] loss0.021-|Sample:5.06|
[TEST]
{'precision': array([0.0129714]), 'recall': array([0.02779908]), 'ndcg': array([0.02141671])}
EPOCH[181/1000] loss0.021-|Sample:5.11|
EPOCH[182/1000] loss0.020-|Sample:5.20|
EPOCH[183/1000] loss0.020-|Sample:5.08|
EPOCH[184/1000] loss0.020-|Sample:5.12|
EPOCH[185/1000] loss0.021-|Sample:4.98|
EPOCH[186/1000] loss0.020-|Sample:5.08|
EPOCH[187/1000] loss0.020-|Sample:5.06|
EPOCH[188/1000] loss0.020-|Sample:5.06|
EPOCH[189/1000] loss0.019-|Sample:5.25|
EPOCH[190/1000] loss0.019-|Sample:5.08|
[TEST]
{'precision': array([0.01350894]), 'recall': array([0.02934047]), 'ndcg': array([0.02239834])}
EPOCH[191/1000] loss0.019-|Sample:5.05|
EPOCH[192/1000] loss0.019-|Sample:5.16|
EPOCH[193/1000] loss0.019-|Sample:5.05|
EPOCH[194/1000] loss0.019-|Sample:5.08|
EPOCH[195/1000] loss0.018-|Sample:5.11|
EPOCH[196/1000] loss0.019-|Sample:5.11|
EPOCH[197/1000] loss0.018-|Sample:5.05|
EPOCH[198/1000] loss0.018-|Sample:5.03|
EPOCH[199/1000] loss0.018-|Sample:5.20|
EPOCH[200/1000] loss0.018-|Sample:5.14|
[TEST]
{'precision': array([0.01395438]), 'recall': array([0.03079584]), 'ndcg': array([0.0234068])}
EPOCH[201/1000] loss0.018-|Sample:4.98|
EPOCH[202/1000] loss0.018-|Sample:5.00|
EPOCH[203/1000] loss0.017-|Sample:5.22|
EPOCH[204/1000] loss0.017-|Sample:4.98|
EPOCH[205/1000] loss0.018-|Sample:5.26|
EPOCH[206/1000] loss0.017-|Sample:4.97|
EPOCH[207/1000] loss0.017-|Sample:5.55|
EPOCH[208/1000] loss0.017-|Sample:5.23|
EPOCH[209/1000] loss0.017-|Sample:5.39|
EPOCH[210/1000] loss0.017-|Sample:5.06|
[TEST]
{'precision': array([0.01451035]), 'recall': array([0.03298011]), 'ndcg': array([0.02459524])}
EPOCH[211/1000] loss0.017-|Sample:5.08|
EPOCH[212/1000] loss0.017-|Sample:5.03|
EPOCH[213/1000] loss0.016-|Sample:5.19|
EPOCH[214/1000] loss0.016-|Sample:5.08|
EPOCH[215/1000] loss0.016-|Sample:5.41|
EPOCH[216/1000] loss0.016-|Sample:5.06|
EPOCH[217/1000] loss0.016-|Sample:5.08|
EPOCH[218/1000] loss0.016-|Sample:5.22|
EPOCH[219/1000] loss0.016-|Sample:5.25|
EPOCH[220/1000] loss0.016-|Sample:5.17|
[TEST]
{'precision': array([0.01511823]), 'recall': array([0.03502476]), 'ndcg': array([0.02595442])}
EPOCH[221/1000] loss0.016-|Sample:4.97|
EPOCH[222/1000] loss0.016-|Sample:5.16|
EPOCH[223/1000] loss0.016-|Sample:5.08|
EPOCH[224/1000] loss0.016-|Sample:5.20|
EPOCH[225/1000] loss0.016-|Sample:5.06|
EPOCH[226/1000] loss0.015-|Sample:4.97|
EPOCH[227/1000] loss0.016-|Sample:5.19|
EPOCH[228/1000] loss0.015-|Sample:5.30|
EPOCH[229/1000] loss0.015-|Sample:5.09|
EPOCH[230/1000] loss0.015-|Sample:5.11|
[TEST]
{'precision': array([0.01561223]), 'recall': array([0.03698892]), 'ndcg': array([0.02758954])}
EPOCH[231/1000] loss0.015-|Sample:5.03|
EPOCH[232/1000] loss0.015-|Sample:5.14|
EPOCH[233/1000] loss0.015-|Sample:5.08|
EPOCH[234/1000] loss0.015-|Sample:5.05|
EPOCH[235/1000] loss0.015-|Sample:5.09|
EPOCH[236/1000] loss0.015-|Sample:5.01|
EPOCH[237/1000] loss0.015-|Sample:5.00|
EPOCH[238/1000] loss0.014-|Sample:5.44|
EPOCH[239/1000] loss0.014-|Sample:5.16|
EPOCH[240/1000] loss0.014-|Sample:4.98|
[TEST]
{'precision': array([0.01620001]), 'recall': array([0.03896507]), 'ndcg': array([0.02906943])}
EPOCH[241/1000] loss0.014-|Sample:5.09|
EPOCH[242/1000] loss0.014-|Sample:5.06|
EPOCH[243/1000] loss0.014-|Sample:5.00|
EPOCH[244/1000] loss0.014-|Sample:5.11|
EPOCH[245/1000] loss0.014-|Sample:5.05|
EPOCH[246/1000] loss0.014-|Sample:5.16|
EPOCH[247/1000] loss0.014-|Sample:5.39|
EPOCH[248/1000] loss0.014-|Sample:5.05|
EPOCH[249/1000] loss0.014-|Sample:5.45|
EPOCH[250/1000] loss0.014-|Sample:5.22|
[TEST]
{'precision': array([0.01676435]), 'recall': array([0.04143729]), 'ndcg': array([0.03077025])}
EPOCH[251/1000] loss0.013-|Sample:5.31|
EPOCH[252/1000] loss0.013-|Sample:5.12|
EPOCH[253/1000] loss0.013-|Sample:5.16|
EPOCH[254/1000] loss0.013-|Sample:5.12|
EPOCH[255/1000] loss0.013-|Sample:5.03|
EPOCH[256/1000] loss0.014-|Sample:5.17|
EPOCH[257/1000] loss0.013-|Sample:5.44|
EPOCH[258/1000] loss0.013-|Sample:5.12|
EPOCH[259/1000] loss0.013-|Sample:5.08|
EPOCH[260/1000] loss0.013-|Sample:5.12|
[TEST]
{'precision': array([0.0171696]), 'recall': array([0.043488]), 'ndcg': array([0.03228115])}
EPOCH[261/1000] loss0.013-|Sample:5.23|
EPOCH[262/1000] loss0.013-|Sample:5.06|
EPOCH[263/1000] loss0.012-|Sample:5.33|
EPOCH[264/1000] loss0.013-|Sample:5.11|
EPOCH[265/1000] loss0.013-|Sample:5.26|
EPOCH[266/1000] loss0.013-|Sample:4.95|
EPOCH[267/1000] loss0.013-|Sample:5.03|
EPOCH[268/1000] loss0.012-|Sample:5.06|
EPOCH[269/1000] loss0.012-|Sample:5.05|
EPOCH[270/1000] loss0.012-|Sample:5.08|
[TEST]
{'precision': array([0.01757151]), 'recall': array([0.04523327]), 'ndcg': array([0.03376131])}
EPOCH[271/1000] loss0.012-|Sample:4.92|
EPOCH[272/1000] loss0.012-|Sample:5.16|
EPOCH[273/1000] loss0.012-|Sample:5.55|
EPOCH[274/1000] loss0.012-|Sample:5.22|
EPOCH[275/1000] loss0.012-|Sample:5.11|
EPOCH[276/1000] loss0.012-|Sample:5.03|
EPOCH[277/1000] loss0.012-|Sample:5.00|
EPOCH[278/1000] loss0.012-|Sample:5.25|
EPOCH[279/1000] loss0.012-|Sample:5.23|
EPOCH[280/1000] loss0.012-|Sample:4.97|
[TEST]
{'precision': array([0.01826646]), 'recall': array([0.04821141]), 'ndcg': array([0.03613185])}
EPOCH[281/1000] loss0.012-|Sample:5.01|
EPOCH[282/1000] loss0.012-|Sample:5.14|
EPOCH[283/1000] loss0.012-|Sample:5.47|
EPOCH[284/1000] loss0.012-|Sample:5.03|
EPOCH[285/1000] loss0.011-|Sample:4.97|
EPOCH[286/1000] loss0.012-|Sample:5.01|
EPOCH[287/1000] loss0.012-|Sample:4.95|
EPOCH[288/1000] loss0.012-|Sample:5.42|
EPOCH[289/1000] loss0.011-|Sample:5.12|
EPOCH[290/1000] loss0.012-|Sample:5.00|
[TEST]
{'precision': array([0.01886764]), 'recall': array([0.05055409]), 'ndcg': array([0.03798287])}
EPOCH[291/1000] loss0.011-|Sample:5.00|
EPOCH[292/1000] loss0.011-|Sample:5.01|
EPOCH[293/1000] loss0.011-|Sample:5.14|
EPOCH[294/1000] loss0.011-|Sample:5.14|
EPOCH[295/1000] loss0.011-|Sample:5.08|
EPOCH[296/1000] loss0.011-|Sample:5.05|
EPOCH[297/1000] loss0.011-|Sample:5.01|
EPOCH[298/1000] loss0.011-|Sample:5.03|
EPOCH[299/1000] loss0.011-|Sample:5.28|
EPOCH[300/1000] loss0.011-|Sample:5.16|
[TEST]
{'precision': array([0.01937169]), 'recall': array([0.05290859]), 'ndcg': array([0.04014456])}
EPOCH[301/1000] loss0.011-|Sample:5.14|
EPOCH[302/1000] loss0.011-|Sample:5.48|
EPOCH[303/1000] loss0.011-|Sample:5.28|
EPOCH[304/1000] loss0.011-|Sample:5.22|
EPOCH[305/1000] loss0.011-|Sample:5.26|
EPOCH[306/1000] loss0.011-|Sample:5.09|
EPOCH[307/1000] loss0.011-|Sample:5.20|
EPOCH[308/1000] loss0.011-|Sample:5.39|
EPOCH[309/1000] loss0.011-|Sample:5.16|
EPOCH[310/1000] loss0.011-|Sample:4.91|
[TEST]
{'precision': array([0.01999297]), 'recall': array([0.05596266]), 'ndcg': array([0.04195801])}
EPOCH[311/1000] loss0.011-|Sample:5.37|
EPOCH[312/1000] loss0.011-|Sample:5.05|
EPOCH[313/1000] loss0.010-|Sample:5.30|
EPOCH[314/1000] loss0.010-|Sample:5.30|
EPOCH[315/1000] loss0.010-|Sample:5.03|
EPOCH[316/1000] loss0.010-|Sample:4.98|
EPOCH[317/1000] loss0.010-|Sample:5.39|
EPOCH[318/1000] loss0.010-|Sample:5.11|
EPOCH[319/1000] loss0.010-|Sample:5.11|
EPOCH[320/1000] loss0.010-|Sample:5.26|
[TEST]
{'precision': array([0.02064606]), 'recall': array([0.05899943]), 'ndcg': array([0.04416294])}
EPOCH[321/1000] loss0.010-|Sample:5.03|
EPOCH[322/1000] loss0.010-|Sample:5.45|
EPOCH[323/1000] loss0.010-|Sample:5.31|
EPOCH[324/1000] loss0.010-|Sample:5.53|
EPOCH[325/1000] loss0.010-|Sample:5.69|
EPOCH[326/1000] loss0.010-|Sample:5.06|
EPOCH[327/1000] loss0.010-|Sample:5.14|
EPOCH[328/1000] loss0.010-|Sample:5.19|
EPOCH[329/1000] loss0.010-|Sample:5.28|
EPOCH[330/1000] loss0.010-|Sample:5.40|
[TEST]
{'precision': array([0.02135106]), 'recall': array([0.06228021]), 'ndcg': array([0.0463666])}
EPOCH[331/1000] loss0.010-|Sample:5.17|
EPOCH[332/1000] loss0.010-|Sample:5.16|
EPOCH[333/1000] loss0.010-|Sample:5.22|
EPOCH[334/1000] loss0.010-|Sample:5.08|
EPOCH[335/1000] loss0.010-|Sample:5.08|
EPOCH[336/1000] loss0.010-|Sample:5.56|
EPOCH[337/1000] loss0.010-|Sample:5.65|
EPOCH[338/1000] loss0.010-|Sample:5.76|
EPOCH[339/1000] loss0.010-|Sample:5.72|
EPOCH[340/1000] loss0.010-|Sample:6.51|
[TEST]
{'precision': array([0.02185511]), 'recall': array([0.06479589]), 'ndcg': array([0.04816018])}
EPOCH[341/1000] loss0.009-|Sample:6.39|
EPOCH[342/1000] loss0.010-|Sample:5.73|
EPOCH[343/1000] loss0.010-|Sample:5.48|
EPOCH[344/1000] loss0.009-|Sample:5.73|
EPOCH[345/1000] loss0.010-|Sample:5.62|
EPOCH[346/1000] loss0.009-|Sample:5.95|
EPOCH[347/1000] loss0.009-|Sample:5.67|
EPOCH[348/1000] loss0.009-|Sample:6.12|
EPOCH[349/1000] loss0.009-|Sample:6.20|
EPOCH[350/1000] loss0.009-|Sample:5.67|
[TEST]
{'precision': array([0.0224362]), 'recall': array([0.0675353]), 'ndcg': array([0.05014294])}
EPOCH[351/1000] loss0.009-|Sample:5.64|
EPOCH[352/1000] loss0.009-|Sample:5.55|
EPOCH[353/1000] loss0.009-|Sample:5.76|
EPOCH[354/1000] loss0.009-|Sample:6.31|
EPOCH[355/1000] loss0.009-|Sample:6.65|
EPOCH[356/1000] loss0.009-|Sample:5.53|
EPOCH[357/1000] loss0.009-|Sample:5.70|
EPOCH[358/1000] loss0.009-|Sample:6.36|
EPOCH[359/1000] loss0.009-|Sample:5.58|
EPOCH[360/1000] loss0.009-|Sample:6.01|
[TEST]
{'precision': array([0.02302733]), 'recall': array([0.07017675]), 'ndcg': array([0.05231093])}
EPOCH[361/1000] loss0.009-|Sample:5.64|
EPOCH[362/1000] loss0.009-|Sample:5.47|
EPOCH[363/1000] loss0.009-|Sample:5.67|
EPOCH[364/1000] loss0.009-|Sample:5.72|
EPOCH[365/1000] loss0.009-|Sample:5.62|
EPOCH[366/1000] loss0.009-|Sample:6.39|
EPOCH[367/1000] loss0.009-|Sample:6.50|
EPOCH[368/1000] loss0.009-|Sample:6.45|
EPOCH[369/1000] loss0.009-|Sample:5.62|
EPOCH[370/1000] loss0.009-|Sample:5.94|
[TEST]
{'precision': array([0.02358832]), 'recall': array([0.07277528]), 'ndcg': array([0.05467976])}
EPOCH[371/1000] loss0.009-|Sample:5.53|
EPOCH[372/1000] loss0.009-|Sample:5.81|
EPOCH[373/1000] loss0.009-|Sample:5.53|
EPOCH[374/1000] loss0.009-|Sample:6.08|
EPOCH[375/1000] loss0.009-|Sample:6.73|
EPOCH[376/1000] loss0.009-|Sample:6.69|
EPOCH[377/1000] loss0.009-|Sample:5.51|
EPOCH[378/1000] loss0.009-|Sample:5.48|
EPOCH[379/1000] loss0.009-|Sample:5.94|
EPOCH[380/1000] loss0.008-|Sample:5.53|
[TEST]
{'precision': array([0.02421462]), 'recall': array([0.07519862]), 'ndcg': array([0.0566])}
EPOCH[381/1000] loss0.009-|Sample:5.76|
EPOCH[382/1000] loss0.009-|Sample:5.76|
EPOCH[383/1000] loss0.009-|Sample:5.69|
EPOCH[384/1000] loss0.008-|Sample:5.64|
EPOCH[385/1000] loss0.008-|Sample:6.67|
EPOCH[386/1000] loss0.008-|Sample:5.48|
EPOCH[387/1000] loss0.008-|Sample:6.62|
EPOCH[388/1000] loss0.008-|Sample:6.19|
EPOCH[389/1000] loss0.008-|Sample:5.58|
EPOCH[390/1000] loss0.008-|Sample:5.56|
[TEST]
{'precision': array([0.02465168]), 'recall': array([0.07754746]), 'ndcg': array([0.05843726])}
EPOCH[391/1000] loss0.009-|Sample:5.78|
EPOCH[392/1000] loss0.009-|Sample:5.55|
EPOCH[393/1000] loss0.008-|Sample:5.78|
EPOCH[394/1000] loss0.008-|Sample:6.34|
EPOCH[395/1000] loss0.008-|Sample:6.15|
EPOCH[396/1000] loss0.008-|Sample:5.73|
EPOCH[397/1000] loss0.008-|Sample:5.59|
EPOCH[398/1000] loss0.008-|Sample:5.75|
EPOCH[399/1000] loss0.008-|Sample:5.69|
EPOCH[400/1000] loss0.008-|Sample:5.55|
[TEST]
{'precision': array([0.02532822]), 'recall': array([0.0807678]), 'ndcg': array([0.06063175])}
EPOCH[401/1000] loss0.008-|Sample:6.47|
EPOCH[402/1000] loss0.008-|Sample:5.65|
EPOCH[403/1000] loss0.008-|Sample:5.69|
EPOCH[404/1000] loss0.008-|Sample:5.81|
EPOCH[405/1000] loss0.008-|Sample:5.75|
EPOCH[406/1000] loss0.008-|Sample:5.62|
EPOCH[407/1000] loss0.008-|Sample:6.61|
EPOCH[408/1000] loss0.008-|Sample:5.58|
EPOCH[409/1000] loss0.008-|Sample:6.19|
EPOCH[410/1000] loss0.008-|Sample:5.53|
[TEST]
{'precision': array([0.02563802]), 'recall': array([0.0819798]), 'ndcg': array([0.06189011])}
EPOCH[411/1000] loss0.008-|Sample:5.90|
EPOCH[412/1000] loss0.008-|Sample:5.62|
EPOCH[413/1000] loss0.008-|Sample:6.73|
EPOCH[414/1000] loss0.008-|Sample:6.47|
EPOCH[415/1000] loss0.008-|Sample:5.50|
EPOCH[416/1000] loss0.008-|Sample:5.48|
EPOCH[417/1000] loss0.008-|Sample:6.11|
EPOCH[418/1000] loss0.008-|Sample:5.67|
EPOCH[419/1000] loss0.008-|Sample:5.65|
EPOCH[420/1000] loss0.008-|Sample:6.30|
[TEST]
{'precision': array([0.02644015]), 'recall': array([0.08497008]), 'ndcg': array([0.06424189])}
EPOCH[421/1000] loss0.008-|Sample:5.58|
EPOCH[422/1000] loss0.008-|Sample:5.81|
EPOCH[423/1000] loss0.008-|Sample:6.31|
EPOCH[424/1000] loss0.008-|Sample:5.61|
EPOCH[425/1000] loss0.008-|Sample:5.64|
EPOCH[426/1000] loss0.008-|Sample:6.06|
EPOCH[427/1000] loss0.008-|Sample:5.87|
EPOCH[428/1000] loss0.008-|Sample:5.64|
EPOCH[429/1000] loss0.008-|Sample:5.59|
EPOCH[430/1000] loss0.008-|Sample:5.64|
[TEST]
{'precision': array([0.02679684]), 'recall': array([0.08698336]), 'ndcg': array([0.06540117])}
EPOCH[431/1000] loss0.008-|Sample:6.22|
EPOCH[432/1000] loss0.008-|Sample:6.94|
EPOCH[433/1000] loss0.008-|Sample:5.94|
EPOCH[434/1000] loss0.007-|Sample:6.73|
EPOCH[435/1000] loss0.008-|Sample:5.83|
EPOCH[436/1000] loss0.008-|Sample:5.59|
EPOCH[437/1000] loss0.007-|Sample:5.55|
EPOCH[438/1000] loss0.007-|Sample:5.58|
EPOCH[439/1000] loss0.008-|Sample:6.33|
EPOCH[440/1000] loss0.008-|Sample:6.19|
[TEST]
{'precision': array([0.02700449]), 'recall': array([0.08837072]), 'ndcg': array([0.06633225])}
EPOCH[441/1000] loss0.007-|Sample:6.15|
EPOCH[442/1000] loss0.007-|Sample:5.59|
EPOCH[443/1000] loss0.007-|Sample:5.44|
EPOCH[444/1000] loss0.007-|Sample:5.58|
EPOCH[445/1000] loss0.007-|Sample:5.70|
EPOCH[446/1000] loss0.007-|Sample:5.97|
EPOCH[447/1000] loss0.007-|Sample:6.17|
EPOCH[448/1000] loss0.007-|Sample:6.56|
EPOCH[449/1000] loss0.007-|Sample:5.67|
EPOCH[450/1000] loss0.007-|Sample:5.87|
[TEST]
{'precision': array([0.02732601]), 'recall': array([0.08971765]), 'ndcg': array([0.06733873])}
EPOCH[451/1000] loss0.007-|Sample:5.69|
EPOCH[452/1000] loss0.007-|Sample:6.05|
EPOCH[453/1000] loss0.007-|Sample:5.80|
EPOCH[454/1000] loss0.007-|Sample:5.59|
EPOCH[455/1000] loss0.007-|Sample:5.59|
EPOCH[456/1000] loss0.007-|Sample:5.92|
EPOCH[457/1000] loss0.007-|Sample:5.75|
EPOCH[458/1000] loss0.007-|Sample:5.90|
EPOCH[459/1000] loss0.007-|Sample:6.48|
EPOCH[460/1000] loss0.007-|Sample:5.87|
[TEST]
{'precision': array([0.02779825]), 'recall': array([0.09135495]), 'ndcg': array([0.06896972])}
EPOCH[461/1000] loss0.007-|Sample:5.56|
EPOCH[462/1000] loss0.007-|Sample:5.72|
EPOCH[463/1000] loss0.007-|Sample:5.64|
EPOCH[464/1000] loss0.007-|Sample:5.47|
EPOCH[465/1000] loss0.007-|Sample:7.56|
EPOCH[466/1000] loss0.007-|Sample:5.92|
EPOCH[467/1000] loss0.007-|Sample:6.05|
EPOCH[468/1000] loss0.007-|Sample:5.50|
EPOCH[469/1000] loss0.007-|Sample:5.97|
EPOCH[470/1000] loss0.007-|Sample:5.58|
[TEST]
{'precision': array([0.02821689]), 'recall': array([0.09290416]), 'ndcg': array([0.07022351])}
EPOCH[471/1000] loss0.007-|Sample:6.70|
EPOCH[472/1000] loss0.007-|Sample:5.53|
EPOCH[473/1000] loss0.007-|Sample:6.12|
EPOCH[474/1000] loss0.007-|Sample:6.22|
EPOCH[475/1000] loss0.007-|Sample:5.95|
EPOCH[476/1000] loss0.007-|Sample:5.56|
EPOCH[477/1000] loss0.007-|Sample:6.12|
EPOCH[478/1000] loss0.007-|Sample:5.69|
EPOCH[479/1000] loss0.007-|Sample:5.58|
EPOCH[480/1000] loss0.007-|Sample:5.80|
[TEST]
{'precision': array([0.02881472]), 'recall': array([0.09558373]), 'ndcg': array([0.07225996])}
EPOCH[481/1000] loss0.007-|Sample:5.56|
EPOCH[482/1000] loss0.007-|Sample:5.65|
EPOCH[483/1000] loss0.007-|Sample:6.70|
EPOCH[484/1000] loss0.007-|Sample:6.19|
EPOCH[485/1000] loss0.007-|Sample:5.56|
EPOCH[486/1000] loss0.007-|Sample:5.51|
EPOCH[487/1000] loss0.007-|Sample:5.48|
EPOCH[488/1000] loss0.007-|Sample:5.61|
EPOCH[489/1000] loss0.007-|Sample:6.00|
EPOCH[490/1000] loss0.007-|Sample:5.97|
[TEST]
{'precision': array([0.02914797]), 'recall': array([0.09730694]), 'ndcg': array([0.07403128])}
EPOCH[491/1000] loss0.007-|Sample:5.90|
EPOCH[492/1000] loss0.007-|Sample:5.94|
EPOCH[493/1000] loss0.007-|Sample:6.19|
EPOCH[494/1000] loss0.007-|Sample:5.53|
EPOCH[495/1000] loss0.007-|Sample:5.55|
EPOCH[496/1000] loss0.007-|Sample:5.81|
EPOCH[497/1000] loss0.007-|Sample:6.26|
EPOCH[498/1000] loss0.007-|Sample:5.89|
EPOCH[499/1000] loss0.007-|Sample:6.14|
EPOCH[500/1000] loss0.007-|Sample:5.67|
[TEST]
{'precision': array([0.02957834]), 'recall': array([0.09907141]), 'ndcg': array([0.07466749])}
EPOCH[501/1000] loss0.007-|Sample:6.25|
EPOCH[502/1000] loss0.007-|Sample:5.67|
EPOCH[503/1000] loss0.007-|Sample:6.92|
EPOCH[504/1000] loss0.007-|Sample:5.61|
EPOCH[505/1000] loss0.007-|Sample:5.92|
EPOCH[506/1000] loss0.007-|Sample:6.22|
EPOCH[507/1000] loss0.007-|Sample:5.69|
EPOCH[508/1000] loss0.007-|Sample:5.92|
EPOCH[509/1000] loss0.007-|Sample:5.56|
EPOCH[510/1000] loss0.007-|Sample:6.70|
[TEST]
{'precision': array([0.02983288]), 'recall': array([0.09962064]), 'ndcg': array([0.07566131])}
EPOCH[511/1000] loss0.007-|Sample:5.56|
EPOCH[512/1000] loss0.007-|Sample:5.75|
EPOCH[513/1000] loss0.007-|Sample:5.69|
EPOCH[514/1000] loss0.006-|Sample:5.80|
EPOCH[515/1000] loss0.007-|Sample:5.65|
EPOCH[516/1000] loss0.007-|Sample:5.72|
EPOCH[517/1000] loss0.007-|Sample:5.97|
EPOCH[518/1000] loss0.007-|Sample:5.67|
EPOCH[519/1000] loss0.007-|Sample:5.53|
EPOCH[520/1000] loss0.007-|Sample:5.95|
[TEST]
{'precision': array([0.03050774]), 'recall': array([0.10199919]), 'ndcg': array([0.07724852])}
EPOCH[521/1000] loss0.006-|Sample:5.40|
EPOCH[522/1000] loss0.007-|Sample:5.47|
EPOCH[523/1000] loss0.007-|Sample:6.15|
EPOCH[524/1000] loss0.006-|Sample:5.50|
EPOCH[525/1000] loss0.007-|Sample:5.65|
EPOCH[526/1000] loss0.007-|Sample:5.55|
EPOCH[527/1000] loss0.007-|Sample:5.83|
EPOCH[528/1000] loss0.006-|Sample:6.20|
EPOCH[529/1000] loss0.007-|Sample:6.33|
EPOCH[530/1000] loss0.006-|Sample:6.26|
[TEST]
{'precision': array([0.03080247]), 'recall': array([0.10323229]), 'ndcg': array([0.07823698])}
EPOCH[531/1000] loss0.007-|Sample:6.05|
EPOCH[532/1000] loss0.006-|Sample:5.58|
EPOCH[533/1000] loss0.006-|Sample:5.67|
EPOCH[534/1000] loss0.006-|Sample:5.58|
EPOCH[535/1000] loss0.006-|Sample:5.62|
EPOCH[536/1000] loss0.006-|Sample:6.33|
EPOCH[537/1000] loss0.006-|Sample:6.20|
EPOCH[538/1000] loss0.006-|Sample:5.73|
EPOCH[539/1000] loss0.006-|Sample:5.59|
EPOCH[540/1000] loss0.006-|Sample:6.12|
[TEST]
{'precision': array([0.03102519]), 'recall': array([0.10419846]), 'ndcg': array([0.07988524])}
EPOCH[541/1000] loss0.006-|Sample:5.53|
EPOCH[542/1000] loss0.006-|Sample:6.56|
EPOCH[543/1000] loss0.006-|Sample:5.48|
EPOCH[544/1000] loss0.006-|Sample:5.72|
EPOCH[545/1000] loss0.006-|Sample:5.67|
EPOCH[546/1000] loss0.006-|Sample:6.40|
EPOCH[547/1000] loss0.006-|Sample:5.62|
EPOCH[548/1000] loss0.006-|Sample:6.12|
EPOCH[549/1000] loss0.006-|Sample:6.03|
EPOCH[550/1000] loss0.006-|Sample:5.48|
[TEST]
{'precision': array([0.0311893]), 'recall': array([0.1045356]), 'ndcg': array([0.0801354])}
EPOCH[551/1000] loss0.006-|Sample:6.25|
EPOCH[552/1000] loss0.006-|Sample:5.53|
EPOCH[553/1000] loss0.006-|Sample:6.11|
EPOCH[554/1000] loss0.006-|Sample:6.48|
EPOCH[555/1000] loss0.006-|Sample:7.00|
EPOCH[556/1000] loss0.006-|Sample:5.61|
EPOCH[557/1000] loss0.006-|Sample:6.11|
EPOCH[558/1000] loss0.006-|Sample:5.56|
EPOCH[559/1000] loss0.006-|Sample:5.67|
EPOCH[560/1000] loss0.006-|Sample:5.53|
[TEST]
{'precision': array([0.03181392]), 'recall': array([0.10698884]), 'ndcg': array([0.08181912])}
EPOCH[561/1000] loss0.006-|Sample:6.55|
EPOCH[562/1000] loss0.006-|Sample:5.83|
EPOCH[563/1000] loss0.006-|Sample:6.59|
EPOCH[564/1000] loss0.006-|Sample:6.17|
EPOCH[565/1000] loss0.006-|Sample:6.08|
EPOCH[566/1000] loss0.006-|Sample:5.78|
EPOCH[567/1000] loss0.006-|Sample:5.72|
EPOCH[568/1000] loss0.006-|Sample:5.62|
EPOCH[569/1000] loss0.006-|Sample:5.59|
EPOCH[570/1000] loss0.006-|Sample:6.25|
[TEST]
{'precision': array([0.031901]), 'recall': array([0.1074092]), 'ndcg': array([0.08234098])}
EPOCH[571/1000] loss0.006-|Sample:5.48|
EPOCH[572/1000] loss0.006-|Sample:6.23|
EPOCH[573/1000] loss0.006-|Sample:5.56|
EPOCH[574/1000] loss0.006-|Sample:5.67|
EPOCH[575/1000] loss0.006-|Sample:5.97|
EPOCH[576/1000] loss0.006-|Sample:6.01|
EPOCH[577/1000] loss0.006-|Sample:6.30|
EPOCH[578/1000] loss0.006-|Sample:5.55|
EPOCH[579/1000] loss0.006-|Sample:5.62|
EPOCH[580/1000] loss0.006-|Sample:5.53|
[TEST]
{'precision': array([0.03241175]), 'recall': array([0.10898764]), 'ndcg': array([0.08299057])}
EPOCH[581/1000] loss0.006-|Sample:6.70|
EPOCH[582/1000] loss0.006-|Sample:6.56|
EPOCH[583/1000] loss0.006-|Sample:6.00|
EPOCH[584/1000] loss0.006-|Sample:5.75|
EPOCH[585/1000] loss0.006-|Sample:5.55|
EPOCH[586/1000] loss0.006-|Sample:5.58|
EPOCH[587/1000] loss0.006-|Sample:6.05|
EPOCH[588/1000] loss0.006-|Sample:6.31|
EPOCH[589/1000] loss0.006-|Sample:6.45|
EPOCH[590/1000] loss0.006-|Sample:5.61|
[TEST]
{'precision': array([0.03260935]), 'recall': array([0.11001934]), 'ndcg': array([0.08387553])}
EPOCH[591/1000] loss0.006-|Sample:5.81|
EPOCH[592/1000] loss0.006-|Sample:6.11|
EPOCH[593/1000] loss0.006-|Sample:5.58|
EPOCH[594/1000] loss0.006-|Sample:6.31|
EPOCH[595/1000] loss0.006-|Sample:5.53|
EPOCH[596/1000] loss0.006-|Sample:5.72|
EPOCH[597/1000] loss0.006-|Sample:5.64|
EPOCH[598/1000] loss0.006-|Sample:5.47|
EPOCH[599/1000] loss0.006-|Sample:5.69|
EPOCH[600/1000] loss0.006-|Sample:5.48|
[TEST]
{'precision': array([0.03277011]), 'recall': array([0.11040592]), 'ndcg': array([0.08455438])}
EPOCH[601/1000] loss0.006-|Sample:6.58|
EPOCH[602/1000] loss0.006-|Sample:6.03|
EPOCH[603/1000] loss0.006-|Sample:5.55|
EPOCH[604/1000] loss0.006-|Sample:5.76|
EPOCH[605/1000] loss0.006-|Sample:5.61|
EPOCH[606/1000] loss0.006-|Sample:5.51|
EPOCH[607/1000] loss0.006-|Sample:6.36|
EPOCH[608/1000] loss0.006-|Sample:5.67|
EPOCH[609/1000] loss0.006-|Sample:6.03|
EPOCH[610/1000] loss0.006-|Sample:5.84|
[TEST]
{'precision': array([0.03320216]), 'recall': array([0.11220941]), 'ndcg': array([0.08618788])}
EPOCH[611/1000] loss0.006-|Sample:5.55|
EPOCH[612/1000] loss0.006-|Sample:5.51|
EPOCH[613/1000] loss0.006-|Sample:6.03|
EPOCH[614/1000] loss0.006-|Sample:5.75|
EPOCH[615/1000] loss0.006-|Sample:5.84|
EPOCH[616/1000] loss0.006-|Sample:6.20|
EPOCH[617/1000] loss0.006-|Sample:5.47|
EPOCH[618/1000] loss0.006-|Sample:5.69|
EPOCH[619/1000] loss0.006-|Sample:6.01|
EPOCH[620/1000] loss0.006-|Sample:6.61|
[TEST]
{'precision': array([0.03365597]), 'recall': array([0.11379755]), 'ndcg': array([0.08689315])}
EPOCH[621/1000] loss0.006-|Sample:5.53|
EPOCH[622/1000] loss0.006-|Sample:6.31|
EPOCH[623/1000] loss0.006-|Sample:5.58|
EPOCH[624/1000] loss0.006-|Sample:5.61|
EPOCH[625/1000] loss0.006-|Sample:5.67|
EPOCH[626/1000] loss0.006-|Sample:6.26|
EPOCH[627/1000] loss0.006-|Sample:6.30|
EPOCH[628/1000] loss0.006-|Sample:6.61|
EPOCH[629/1000] loss0.006-|Sample:5.72|
EPOCH[630/1000] loss0.006-|Sample:5.72|
[TEST]
{'precision': array([0.03371626]), 'recall': array([0.11398891]), 'ndcg': array([0.08753047])}
EPOCH[631/1000] loss0.006-|Sample:5.65|
EPOCH[632/1000] loss0.006-|Sample:5.95|
EPOCH[633/1000] loss0.006-|Sample:5.78|
EPOCH[634/1000] loss0.006-|Sample:6.05|
EPOCH[635/1000] loss0.006-|Sample:6.78|
EPOCH[636/1000] loss0.006-|Sample:5.80|
EPOCH[637/1000] loss0.006-|Sample:5.65|
EPOCH[638/1000] loss0.006-|Sample:5.62|
EPOCH[639/1000] loss0.006-|Sample:5.69|
EPOCH[640/1000] loss0.006-|Sample:5.62|
[TEST]
{'precision': array([0.03389041]), 'recall': array([0.11498795]), 'ndcg': array([0.08787988])}
EPOCH[641/1000] loss0.006-|Sample:6.19|
EPOCH[642/1000] loss0.006-|Sample:5.61|
EPOCH[643/1000] loss0.006-|Sample:5.51|
EPOCH[644/1000] loss0.006-|Sample:5.72|
EPOCH[645/1000] loss0.006-|Sample:6.08|
EPOCH[646/1000] loss0.006-|Sample:5.67|
EPOCH[647/1000] loss0.006-|Sample:6.47|
EPOCH[648/1000] loss0.006-|Sample:5.72|
EPOCH[649/1000] loss0.006-|Sample:5.67|
EPOCH[650/1000] loss0.006-|Sample:6.12|
[TEST]
{'precision': array([0.03426385]), 'recall': array([0.1160717]), 'ndcg': array([0.08939973])}
EPOCH[651/1000] loss0.006-|Sample:5.55|
EPOCH[652/1000] loss0.006-|Sample:5.55|
EPOCH[653/1000] loss0.006-|Sample:6.56|
EPOCH[654/1000] loss0.006-|Sample:6.62|
EPOCH[655/1000] loss0.006-|Sample:5.65|
EPOCH[656/1000] loss0.006-|Sample:5.81|
EPOCH[657/1000] loss0.006-|Sample:5.80|
EPOCH[658/1000] loss0.006-|Sample:5.51|
EPOCH[659/1000] loss0.006-|Sample:5.65|
EPOCH[660/1000] loss0.006-|Sample:5.78|
[TEST]
{'precision': array([0.03448992]), 'recall': array([0.11705194]), 'ndcg': array([0.09001902])}
EPOCH[661/1000] loss0.006-|Sample:5.69|
EPOCH[662/1000] loss0.006-|Sample:5.62|
EPOCH[663/1000] loss0.006-|Sample:5.94|
EPOCH[664/1000] loss0.006-|Sample:5.64|
EPOCH[665/1000] loss0.006-|Sample:5.47|
EPOCH[666/1000] loss0.006-|Sample:6.31|
EPOCH[667/1000] loss0.006-|Sample:5.76|
EPOCH[668/1000] loss0.006-|Sample:5.55|
EPOCH[669/1000] loss0.006-|Sample:6.50|
EPOCH[670/1000] loss0.006-|Sample:5.58|
[TEST]
{'precision': array([0.03472604]), 'recall': array([0.1179346]), 'ndcg': array([0.09071301])}
EPOCH[671/1000] loss0.006-|Sample:5.83|
EPOCH[672/1000] loss0.006-|Sample:6.14|
EPOCH[673/1000] loss0.006-|Sample:6.76|
EPOCH[674/1000] loss0.006-|Sample:5.83|
EPOCH[675/1000] loss0.006-|Sample:5.61|
EPOCH[676/1000] loss0.005-|Sample:5.34|
EPOCH[677/1000] loss0.006-|Sample:6.12|
EPOCH[678/1000] loss0.005-|Sample:5.69|
EPOCH[679/1000] loss0.006-|Sample:6.03|
EPOCH[680/1000] loss0.005-|Sample:5.81|
[TEST]
{'precision': array([0.03491861]), 'recall': array([0.11875469]), 'ndcg': array([0.09099635])}
EPOCH[681/1000] loss0.006-|Sample:5.58|
EPOCH[682/1000] loss0.006-|Sample:5.64|
EPOCH[683/1000] loss0.006-|Sample:5.95|
EPOCH[684/1000] loss0.006-|Sample:5.51|
EPOCH[685/1000] loss0.006-|Sample:5.87|
EPOCH[686/1000] loss0.006-|Sample:5.94|
EPOCH[687/1000] loss0.005-|Sample:5.47|
EPOCH[688/1000] loss0.006-|Sample:5.80|
EPOCH[689/1000] loss0.006-|Sample:5.50|
EPOCH[690/1000] loss0.005-|Sample:5.48|
[TEST]
{'precision': array([0.0351899]), 'recall': array([0.11902664]), 'ndcg': array([0.0919496])}
EPOCH[691/1000] loss0.006-|Sample:6.30|
EPOCH[692/1000] loss0.006-|Sample:6.94|
EPOCH[693/1000] loss0.005-|Sample:5.94|
EPOCH[694/1000] loss0.005-|Sample:7.01|
EPOCH[695/1000] loss0.006-|Sample:5.73|
EPOCH[696/1000] loss0.006-|Sample:5.69|
EPOCH[697/1000] loss0.005-|Sample:5.59|
EPOCH[698/1000] loss0.005-|Sample:5.69|
EPOCH[699/1000] loss0.005-|Sample:6.00|
EPOCH[700/1000] loss0.006-|Sample:6.30|
[TEST]
{'precision': array([0.03540592]), 'recall': array([0.11989616]), 'ndcg': array([0.09267597])}
EPOCH[701/1000] loss0.006-|Sample:6.28|
EPOCH[702/1000] loss0.006-|Sample:5.45|
EPOCH[703/1000] loss0.005-|Sample:5.69|
EPOCH[704/1000] loss0.005-|Sample:5.98|
EPOCH[705/1000] loss0.006-|Sample:5.58|
EPOCH[706/1000] loss0.006-|Sample:5.59|
EPOCH[707/1000] loss0.005-|Sample:6.26|
EPOCH[708/1000] loss0.005-|Sample:5.61|
EPOCH[709/1000] loss0.005-|Sample:5.73|
EPOCH[710/1000] loss0.006-|Sample:6.20|
[TEST]
{'precision': array([0.03549635]), 'recall': array([0.12033511]), 'ndcg': array([0.09296769])}
EPOCH[711/1000] loss0.006-|Sample:5.51|
EPOCH[712/1000] loss0.005-|Sample:5.33|
EPOCH[713/1000] loss0.005-|Sample:6.03|
EPOCH[714/1000] loss0.005-|Sample:5.47|
EPOCH[715/1000] loss0.005-|Sample:5.67|
EPOCH[716/1000] loss0.005-|Sample:5.50|
EPOCH[717/1000] loss0.005-|Sample:6.06|
EPOCH[718/1000] loss0.005-|Sample:5.51|
EPOCH[719/1000] loss0.006-|Sample:6.31|
EPOCH[720/1000] loss0.006-|Sample:6.70|
[TEST]
{'precision': array([0.03570232]), 'recall': array([0.12126256]), 'ndcg': array([0.09296272])}
EPOCH[721/1000] loss0.005-|Sample:5.55|
EPOCH[722/1000] loss0.006-|Sample:5.72|
EPOCH[723/1000] loss0.005-|Sample:5.53|
EPOCH[724/1000] loss0.006-|Sample:5.98|
EPOCH[725/1000] loss0.005-|Sample:5.62|
EPOCH[726/1000] loss0.005-|Sample:5.58|
EPOCH[727/1000] loss0.005-|Sample:6.08|
EPOCH[728/1000] loss0.005-|Sample:5.64|
EPOCH[729/1000] loss0.005-|Sample:6.11|
EPOCH[730/1000] loss0.005-|Sample:5.67|
[TEST]
{'precision': array([0.03594514]), 'recall': array([0.12212651]), 'ndcg': array([0.0942333])}
EPOCH[731/1000] loss0.005-|Sample:5.62|
EPOCH[732/1000] loss0.005-|Sample:5.70|
EPOCH[733/1000] loss0.005-|Sample:6.03|
EPOCH[734/1000] loss0.005-|Sample:5.65|
EPOCH[735/1000] loss0.005-|Sample:5.97|
EPOCH[736/1000] loss0.005-|Sample:5.51|
EPOCH[737/1000] loss0.005-|Sample:5.84|
EPOCH[738/1000] loss0.005-|Sample:5.69|
EPOCH[739/1000] loss0.006-|Sample:6.80|
EPOCH[740/1000] loss0.005-|Sample:5.78|
[TEST]
{'precision': array([0.03634872]), 'recall': array([0.12333202]), 'ndcg': array([0.09508998])}
EPOCH[741/1000] loss0.005-|Sample:6.28|
EPOCH[742/1000] loss0.005-|Sample:5.64|
EPOCH[743/1000] loss0.005-|Sample:5.62|
EPOCH[744/1000] loss0.005-|Sample:6.58|
EPOCH[745/1000] loss0.005-|Sample:5.89|
EPOCH[746/1000] loss0.005-|Sample:6.45|
EPOCH[747/1000] loss0.005-|Sample:5.64|
EPOCH[748/1000] loss0.005-|Sample:5.53|
EPOCH[749/1000] loss0.005-|Sample:5.76|
EPOCH[750/1000] loss0.005-|Sample:5.62|
[TEST]
{'precision': array([0.0364291]), 'recall': array([0.12308887]), 'ndcg': array([0.09617502])}
EPOCH[751/1000] loss0.006-|Sample:5.64|
EPOCH[752/1000] loss0.005-|Sample:6.06|
EPOCH[753/1000] loss0.005-|Sample:5.56|
EPOCH[754/1000] loss0.005-|Sample:5.53|
EPOCH[755/1000] loss0.005-|Sample:6.53|
EPOCH[756/1000] loss0.005-|Sample:5.84|
EPOCH[757/1000] loss0.005-|Sample:5.98|
EPOCH[758/1000] loss0.005-|Sample:5.86|
EPOCH[759/1000] loss0.005-|Sample:5.97|
EPOCH[760/1000] loss0.005-|Sample:5.84|
[TEST]
{'precision': array([0.03643915]), 'recall': array([0.12308755]), 'ndcg': array([0.09569424])}
EPOCH[761/1000] loss0.005-|Sample:5.70|
EPOCH[762/1000] loss0.005-|Sample:5.56|
EPOCH[763/1000] loss0.005-|Sample:6.08|
EPOCH[764/1000] loss0.005-|Sample:6.44|
EPOCH[765/1000] loss0.005-|Sample:5.92|
EPOCH[766/1000] loss0.005-|Sample:6.65|
EPOCH[767/1000] loss0.005-|Sample:5.92|
EPOCH[768/1000] loss0.005-|Sample:5.81|
EPOCH[769/1000] loss0.005-|Sample:5.51|
EPOCH[770/1000] loss0.005-|Sample:5.65|
[TEST]
{'precision': array([0.03670206]), 'recall': array([0.12402807]), 'ndcg': array([0.09626061])}
EPOCH[771/1000] loss0.005-|Sample:5.50|
EPOCH[772/1000] loss0.005-|Sample:6.05|
EPOCH[773/1000] loss0.005-|Sample:5.86|
EPOCH[774/1000] loss0.005-|Sample:5.48|
EPOCH[775/1000] loss0.005-|Sample:6.12|
EPOCH[776/1000] loss0.005-|Sample:5.58|
EPOCH[777/1000] loss0.005-|Sample:5.65|
EPOCH[778/1000] loss0.005-|Sample:5.62|
EPOCH[779/1000] loss0.005-|Sample:6.28|
EPOCH[780/1000] loss0.005-|Sample:5.73|
[TEST]
{'precision': array([0.03699678]), 'recall': array([0.12506682]), 'ndcg': array([0.09700371])}
EPOCH[781/1000] loss0.005-|Sample:5.44|
EPOCH[782/1000] loss0.005-|Sample:5.58|
EPOCH[783/1000] loss0.005-|Sample:6.37|
EPOCH[784/1000] loss0.005-|Sample:6.40|
EPOCH[785/1000] loss0.005-|Sample:6.72|
EPOCH[786/1000] loss0.005-|Sample:5.67|
EPOCH[787/1000] loss0.005-|Sample:5.65|
EPOCH[788/1000] loss0.005-|Sample:5.83|
EPOCH[789/1000] loss0.005-|Sample:5.65|
EPOCH[790/1000] loss0.005-|Sample:5.73|
[TEST]
{'precision': array([0.03728481]), 'recall': array([0.12594747]), 'ndcg': array([0.09812766])}
EPOCH[791/1000] loss0.005-|Sample:6.00|
EPOCH[792/1000] loss0.005-|Sample:6.67|
EPOCH[793/1000] loss0.005-|Sample:5.45|
EPOCH[794/1000] loss0.005-|Sample:5.48|
EPOCH[795/1000] loss0.005-|Sample:5.56|
EPOCH[796/1000] loss0.005-|Sample:5.64|
EPOCH[797/1000] loss0.005-|Sample:5.92|
EPOCH[798/1000] loss0.005-|Sample:6.06|
EPOCH[799/1000] loss0.005-|Sample:5.62|
EPOCH[800/1000] loss0.005-|Sample:5.58|
[TEST]
{'precision': array([0.03730491]), 'recall': array([0.12637035]), 'ndcg': array([0.0981321])}
EPOCH[801/1000] loss0.005-|Sample:5.94|
EPOCH[802/1000] loss0.005-|Sample:5.72|
EPOCH[803/1000] loss0.005-|Sample:6.09|
EPOCH[804/1000] loss0.005-|Sample:5.73|
EPOCH[805/1000] loss0.005-|Sample:5.61|
EPOCH[806/1000] loss0.005-|Sample:5.50|
EPOCH[807/1000] loss0.005-|Sample:5.95|
EPOCH[808/1000] loss0.005-|Sample:5.59|
EPOCH[809/1000] loss0.005-|Sample:5.73|
EPOCH[810/1000] loss0.005-|Sample:7.00|
[TEST]
{'precision': array([0.0376415]), 'recall': array([0.12772822]), 'ndcg': array([0.09865516])}
EPOCH[811/1000] loss0.005-|Sample:5.53|
EPOCH[812/1000] loss0.005-|Sample:5.40|
EPOCH[813/1000] loss0.005-|Sample:6.01|
EPOCH[814/1000] loss0.005-|Sample:5.70|
EPOCH[815/1000] loss0.005-|Sample:5.56|
EPOCH[816/1000] loss0.005-|Sample:5.62|
EPOCH[817/1000] loss0.005-|Sample:5.98|
EPOCH[818/1000] loss0.005-|Sample:5.58|
EPOCH[819/1000] loss0.005-|Sample:5.56|
EPOCH[820/1000] loss0.005-|Sample:6.61|
[TEST]
{'precision': array([0.03771686]), 'recall': array([0.12772731]), 'ndcg': array([0.09834748])}
EPOCH[821/1000] loss0.005-|Sample:5.48|
EPOCH[822/1000] loss0.005-|Sample:5.87|
EPOCH[823/1000] loss0.005-|Sample:6.01|
EPOCH[824/1000] loss0.005-|Sample:6.28|
EPOCH[825/1000] loss0.005-|Sample:5.81|
EPOCH[826/1000] loss0.005-|Sample:6.03|
EPOCH[827/1000] loss0.005-|Sample:5.61|
EPOCH[828/1000] loss0.005-|Sample:5.87|
EPOCH[829/1000] loss0.005-|Sample:6.34|
EPOCH[830/1000] loss0.005-|Sample:5.80|
[TEST]
{'precision': array([0.03786925]), 'recall': array([0.12795191]), 'ndcg': array([0.0990927])}
EPOCH[831/1000] loss0.005-|Sample:5.51|
EPOCH[832/1000] loss0.005-|Sample:5.45|
EPOCH[833/1000] loss0.005-|Sample:5.97|
EPOCH[834/1000] loss0.005-|Sample:5.56|
EPOCH[835/1000] loss0.005-|Sample:5.65|
EPOCH[836/1000] loss0.005-|Sample:5.87|
EPOCH[837/1000] loss0.005-|Sample:6.12|
EPOCH[838/1000] loss0.005-|Sample:5.56|
EPOCH[839/1000] loss0.005-|Sample:5.53|
EPOCH[840/1000] loss0.005-|Sample:5.80|
[TEST]
{'precision': array([0.03825105]), 'recall': array([0.12934412]), 'ndcg': array([0.10032059])}
EPOCH[841/1000] loss0.005-|Sample:6.23|
EPOCH[842/1000] loss0.005-|Sample:6.05|
EPOCH[843/1000] loss0.005-|Sample:5.65|
EPOCH[844/1000] loss0.005-|Sample:5.58|
EPOCH[845/1000] loss0.005-|Sample:5.61|
EPOCH[846/1000] loss0.005-|Sample:6.51|
EPOCH[847/1000] loss0.005-|Sample:5.75|
EPOCH[848/1000] loss0.005-|Sample:6.25|
EPOCH[849/1000] loss0.005-|Sample:5.58|
EPOCH[850/1000] loss0.005-|Sample:5.67|
[TEST]
{'precision': array([0.03832809]), 'recall': array([0.12980641]), 'ndcg': array([0.10098403])}
EPOCH[851/1000] loss0.005-|Sample:5.58|
EPOCH[852/1000] loss0.005-|Sample:5.47|
EPOCH[853/1000] loss0.005-|Sample:6.05|
EPOCH[854/1000] loss0.005-|Sample:6.53|
EPOCH[855/1000] loss0.005-|Sample:5.76|
EPOCH[856/1000] loss0.005-|Sample:5.65|
EPOCH[857/1000] loss0.005-|Sample:6.25|
EPOCH[858/1000] loss0.005-|Sample:5.70|
EPOCH[859/1000] loss0.005-|Sample:5.87|
EPOCH[860/1000] loss0.005-|Sample:6.20|
[TEST]
{'precision': array([0.03850057]), 'recall': array([0.13035848]), 'ndcg': array([0.10134143])}
EPOCH[861/1000] loss0.005-|Sample:5.59|
EPOCH[862/1000] loss0.005-|Sample:5.45|
EPOCH[863/1000] loss0.005-|Sample:5.70|
EPOCH[864/1000] loss0.005-|Sample:5.62|
EPOCH[865/1000] loss0.005-|Sample:6.20|
EPOCH[866/1000] loss0.005-|Sample:6.31|
EPOCH[867/1000] loss0.005-|Sample:6.87|
EPOCH[868/1000] loss0.005-|Sample:5.50|
EPOCH[869/1000] loss0.005-|Sample:5.84|
EPOCH[870/1000] loss0.005-|Sample:5.53|
[TEST]
{'precision': array([0.03869817]), 'recall': array([0.1309754]), 'ndcg': array([0.10200799])}
EPOCH[871/1000] loss0.005-|Sample:5.76|
EPOCH[872/1000] loss0.005-|Sample:5.95|
EPOCH[873/1000] loss0.005-|Sample:5.89|
EPOCH[874/1000] loss0.005-|Sample:5.87|
EPOCH[875/1000] loss0.005-|Sample:6.30|
EPOCH[876/1000] loss0.005-|Sample:6.37|
EPOCH[877/1000] loss0.005-|Sample:5.55|
EPOCH[878/1000] loss0.005-|Sample:5.67|
EPOCH[879/1000] loss0.005-|Sample:6.03|
EPOCH[880/1000] loss0.005-|Sample:5.51|
[TEST]
{'precision': array([0.03887735]), 'recall': array([0.13118875]), 'ndcg': array([0.1022988])}
EPOCH[881/1000] loss0.005-|Sample:5.56|
EPOCH[882/1000] loss0.005-|Sample:5.90|
EPOCH[883/1000] loss0.005-|Sample:5.69|
EPOCH[884/1000] loss0.005-|Sample:6.28|
EPOCH[885/1000] loss0.005-|Sample:6.25|
EPOCH[886/1000] loss0.005-|Sample:5.76|
EPOCH[887/1000] loss0.005-|Sample:6.14|
EPOCH[888/1000] loss0.005-|Sample:5.75|
EPOCH[889/1000] loss0.005-|Sample:5.78|
EPOCH[890/1000] loss0.005-|Sample:5.58|
[TEST]
{'precision': array([0.03891419]), 'recall': array([0.1318381]), 'ndcg': array([0.1023968])}
EPOCH[891/1000] loss0.005-|Sample:5.69|
EPOCH[892/1000] loss0.005-|Sample:5.51|
EPOCH[893/1000] loss0.005-|Sample:7.01|
EPOCH[894/1000] loss0.005-|Sample:7.08|
EPOCH[895/1000] loss0.005-|Sample:5.51|
EPOCH[896/1000] loss0.005-|Sample:5.75|
EPOCH[897/1000] loss0.005-|Sample:5.59|
EPOCH[898/1000] loss0.005-|Sample:5.89|
EPOCH[899/1000] loss0.005-|Sample:5.55|
EPOCH[900/1000] loss0.005-|Sample:5.56|
[TEST]
{'precision': array([0.03906658]), 'recall': array([0.13218765]), 'ndcg': array([0.10324211])}
EPOCH[901/1000] loss0.005-|Sample:5.80|
EPOCH[902/1000] loss0.005-|Sample:6.17|
EPOCH[903/1000] loss0.005-|Sample:5.94|
EPOCH[904/1000] loss0.005-|Sample:5.65|
EPOCH[905/1000] loss0.005-|Sample:5.73|
EPOCH[906/1000] loss0.005-|Sample:6.05|
EPOCH[907/1000] loss0.005-|Sample:6.14|
EPOCH[908/1000] loss0.005-|Sample:5.58|
EPOCH[909/1000] loss0.005-|Sample:5.62|
EPOCH[910/1000] loss0.005-|Sample:5.51|
[TEST]
{'precision': array([0.03891754]), 'recall': array([0.13185521]), 'ndcg': array([0.10297668])}
EPOCH[911/1000] loss0.005-|Sample:6.01|
EPOCH[912/1000] loss0.005-|Sample:6.44|
EPOCH[913/1000] loss0.005-|Sample:6.15|
EPOCH[914/1000] loss0.005-|Sample:5.48|
EPOCH[915/1000] loss0.005-|Sample:6.01|
EPOCH[916/1000] loss0.005-|Sample:5.55|
EPOCH[917/1000] loss0.005-|Sample:5.55|
EPOCH[918/1000] loss0.005-|Sample:5.56|
EPOCH[919/1000] loss0.005-|Sample:5.90|
EPOCH[920/1000] loss0.005-|Sample:6.65|
[TEST]
{'precision': array([0.03912519]), 'recall': array([0.13312669]), 'ndcg': array([0.1037287])}
EPOCH[921/1000] loss0.005-|Sample:5.48|
EPOCH[922/1000] loss0.005-|Sample:5.56|
EPOCH[923/1000] loss0.005-|Sample:5.55|
EPOCH[924/1000] loss0.005-|Sample:5.73|
EPOCH[925/1000] loss0.005-|Sample:5.62|
EPOCH[926/1000] loss0.005-|Sample:6.45|
EPOCH[927/1000] loss0.005-|Sample:5.59|
EPOCH[928/1000] loss0.005-|Sample:11.03|
EPOCH[929/1000] loss0.005-|Sample:6.01|
EPOCH[930/1000] loss0.005-|Sample:5.59|
[TEST]
{'precision': array([0.03924074]), 'recall': array([0.13286587]), 'ndcg': array([0.10361158])}
EPOCH[931/1000] loss0.005-|Sample:6.01|
EPOCH[932/1000] loss0.005-|Sample:5.51|
EPOCH[933/1000] loss0.005-|Sample:5.75|
EPOCH[934/1000] loss0.005-|Sample:6.00|
EPOCH[935/1000] loss0.005-|Sample:5.59|
EPOCH[936/1000] loss0.005-|Sample:5.70|
EPOCH[937/1000] loss0.005-|Sample:6.61|
EPOCH[938/1000] loss0.005-|Sample:6.31|
EPOCH[939/1000] loss0.005-|Sample:5.87|
EPOCH[940/1000] loss0.005-|Sample:5.58|
[TEST]
{'precision': array([0.03930605]), 'recall': array([0.1328751]), 'ndcg': array([0.10371612])}
EPOCH[941/1000] loss0.005-|Sample:5.58|
EPOCH[942/1000] loss0.005-|Sample:5.44|
EPOCH[943/1000] loss0.005-|Sample:5.83|
EPOCH[944/1000] loss0.005-|Sample:6.08|
EPOCH[945/1000] loss0.005-|Sample:11.40|
EPOCH[946/1000] loss0.005-|Sample:5.47|
EPOCH[947/1000] loss0.005-|Sample:6.31|
EPOCH[948/1000] loss0.005-|Sample:5.92|
EPOCH[949/1000] loss0.005-|Sample:6.89|
EPOCH[950/1000] loss0.005-|Sample:5.97|
[TEST]
{'precision': array([0.03960748]), 'recall': array([0.13451011]), 'ndcg': array([0.10535183])}
EPOCH[951/1000] loss0.005-|Sample:5.94|
EPOCH[952/1000] loss0.005-|Sample:5.56|
EPOCH[953/1000] loss0.005-|Sample:5.70|
EPOCH[954/1000] loss0.005-|Sample:5.53|
EPOCH[955/1000] loss0.005-|Sample:6.06|
EPOCH[956/1000] loss0.005-|Sample:5.94|
EPOCH[957/1000] loss0.005-|Sample:6.51|
EPOCH[958/1000] loss0.005-|Sample:6.40|
EPOCH[959/1000] loss0.005-|Sample:5.73|
EPOCH[960/1000] loss0.005-|Sample:5.75|
[TEST]
{'precision': array([0.03952207]), 'recall': array([0.13405697]), 'ndcg': array([0.10423513])}
EPOCH[961/1000] loss0.005-|Sample:5.76|
EPOCH[962/1000] loss0.005-|Sample:6.01|
EPOCH[963/1000] loss0.005-|Sample:5.64|
EPOCH[964/1000] loss0.005-|Sample:6.12|
EPOCH[965/1000] loss0.005-|Sample:6.36|
EPOCH[966/1000] loss0.005-|Sample:6.17|
EPOCH[967/1000] loss0.005-|Sample:5.59|
EPOCH[968/1000] loss0.005-|Sample:5.59|
EPOCH[969/1000] loss0.005-|Sample:5.50|
EPOCH[970/1000] loss0.005-|Sample:5.70|
[TEST]
{'precision': array([0.03992565]), 'recall': array([0.13507576]), 'ndcg': array([0.10585997])}
EPOCH[971/1000] loss0.005-|Sample:6.12|
EPOCH[972/1000] loss0.005-|Sample:6.08|
EPOCH[973/1000] loss0.005-|Sample:5.70|
EPOCH[974/1000] loss0.005-|Sample:5.83|
EPOCH[975/1000] loss0.005-|Sample:5.59|
EPOCH[976/1000] loss0.005-|Sample:5.61|
EPOCH[977/1000] loss0.005-|Sample:6.33|
EPOCH[978/1000] loss0.005-|Sample:5.58|
EPOCH[979/1000] loss0.005-|Sample:5.80|
EPOCH[980/1000] loss0.005-|Sample:5.69|
[TEST]
{'precision': array([0.0399156]), 'recall': array([0.13511635]), 'ndcg': array([0.10565528])}
EPOCH[981/1000] loss0.005-|Sample:6.03|
EPOCH[982/1000] loss0.005-|Sample:5.67|
EPOCH[983/1000] loss0.005-|Sample:5.95|
EPOCH[984/1000] loss0.005-|Sample:5.56|
EPOCH[985/1000] loss0.005-|Sample:5.58|
EPOCH[986/1000] loss0.005-|Sample:6.12|
EPOCH[987/1000] loss0.005-|Sample:5.58|
EPOCH[988/1000] loss0.005-|Sample:5.90|
EPOCH[989/1000] loss0.005-|Sample:5.64|
EPOCH[990/1000] loss0.005-|Sample:6.39|
[TEST]
{'precision': array([0.039718]), 'recall': array([0.13396211]), 'ndcg': array([0.10497486])}
EPOCH[991/1000] loss0.005-|Sample:5.56|
EPOCH[992/1000] loss0.005-|Sample:5.98|
EPOCH[993/1000] loss0.005-|Sample:5.59|
EPOCH[994/1000] loss0.005-|Sample:5.72|
EPOCH[995/1000] loss0.005-|Sample:5.51|
EPOCH[996/1000] loss0.005-|Sample:6.01|
EPOCH[997/1000] loss0.005-|Sample:5.59|
EPOCH[998/1000] loss0.005-|Sample:5.73|
EPOCH[999/1000] loss0.005-|Sample:5.67|
EPOCH[1000/1000] loss0.005-|Sample:6.15|

Process finished with exit code 0


lgcn-v1 
D:\ProgramFiles\Anaconda3\envs\image_caption_python36\python.exe D:/workspace/lgcn/run.py
{'name': 'LGCNDataset', 'path': 'data/gowalla', 'device': device(type='cuda'), 'val_ratio': 0.1}
init dataset LGCNDataset
{'name': 'LightGCN', 'embedding_size': 64, 'n_layers': 3, 'dropout': 0.5, 'device': device(type='cuda'), 'dataset': <dataset.LGCNDataset object at 0x0000021415D98860>}
{'name': 'BPRTrainer', 'optimizer': 'Adam', 'lr': 0.001, 'l2_reg': 5e-05, 'n_epochs': 1500, 'batch_size': 2048, 'dataloader_num_workers': 6, 'test_batch_size': 512, 'topks': [20, 100], 'device': device(type='cuda'), 'dataset': <dataset.LGCNDataset object at 0x0000021415D98860>, 'model': LightGCN(
  (embedding): Embedding(70839, 64)
)}
Epoch 0/1500, Loss: 0.430186, Time: 83.559s
Test result. Precision: 2.857%@20, 1.234%@100, Recall: 9.048%@20, 18.998%@100, NDCG: 7.654%@20, 10.570%@100, Time: 3.983s
Save model to checkpoints\LightGCN_BPRTrainer_LGCNDataset_7.654.pth
Epoch 1/1500, Loss: 0.191394, Time: 82.949s
Test result. Precision: 3.137%@20, 1.368%@100, Recall: 9.874%@20, 20.968%@100, NDCG: 8.509%@20, 11.759%@100, Time: 4.093s
Save model to checkpoints\LightGCN_BPRTrainer_LGCNDataset_8.509.pth
Epoch 2/1500, Loss: 0.146884, Time: 82.996s
Test result. Precision: 3.302%@20, 1.454%@100, Recall: 10.413%@20, 22.273%@100, NDCG: 9.020%@20, 12.495%@100, Time: 4.030s
Save model to checkpoints\LightGCN_BPRTrainer_LGCNDataset_9.020.pth
Epoch 3/1500, Loss: 0.124592, Time: 83.106s
Test result. Precision: 3.425%@20, 1.509%@100, Recall: 10.802%@20, 23.176%@100, NDCG: 9.428%@20, 13.058%@100, Time: 4.155s
Save model to checkpoints\LightGCN_BPRTrainer_LGCNDataset_9.428.pth
Epoch 4/1500, Loss: 0.111409, Time: 84.288s
Test result. Precision: 3.509%@20, 1.547%@100, Recall: 11.074%@20, 23.851%@100, NDCG: 9.718%@20, 13.459%@100, Time: 4.155s
Save model to checkpoints\LightGCN_BPRTrainer_LGCNDataset_9.718.pth
Epoch 5/1500, Loss: 0.102148, Time: 83.908s
Test result. Precision: 3.573%@20, 1.576%@100, Recall: 11.282%@20, 24.341%@100, NDCG: 9.905%@20, 13.727%@100, Time: 4.030s
Save model to checkpoints\LightGCN_BPRTrainer_LGCNDataset_9.905.pth
Epoch 6/1500, Loss: 0.095483, Time: 82.981s
Test result. Precision: 3.623%@20, 1.599%@100, Recall: 11.460%@20, 24.765%@100, NDCG: 10.043%@20, 13.933%@100, Time: 3.999s
Save model to checkpoints\LightGCN_BPRTrainer_LGCNDataset_10.043.pth
Epoch 7/1500, Loss: 0.091454, Time: 83.784s
Test result. Precision: 3.673%@20, 1.619%@100, Recall: 11.619%@20, 25.118%@100, NDCG: 10.179%@20, 14.126%@100, Time: 3.999s
Save model to checkpoints\LightGCN_BPRTrainer_LGCNDataset_10.179.pth
Epoch 8/1500, Loss: 0.087840, Time: 82.949s
Test result. Precision: 3.723%@20, 1.637%@100, Recall: 11.800%@20, 25.442%@100, NDCG: 10.318%@20, 14.305%@100, Time: 4.155s
Save model to checkpoints\LightGCN_BPRTrainer_LGCNDataset_10.318.pth
Epoch 9/1500, Loss: 0.084322, Time: 84.090s
Test result. Precision: 3.753%@20, 1.653%@100, Recall: 11.923%@20, 25.732%@100, NDCG: 10.428%@20, 14.465%@100, Time: 4.140s
Save model to checkpoints\LightGCN_BPRTrainer_LGCNDataset_10.428.pth
Epoch 10/1500, Loss: 0.080767, Time: 85.455s
Test result. Precision: 3.787%@20, 1.667%@100, Recall: 12.035%@20, 25.955%@100, NDCG: 10.518%@20, 14.590%@100, Time: 4.306s
Save model to checkpoints\LightGCN_BPRTrainer_LGCNDataset_10.518.pth
Epoch 11/1500, Loss: 0.077470, Time: 84.529s
Test result. Precision: 3.822%@20, 1.679%@100, Recall: 12.161%@20, 26.173%@100, NDCG: 10.629%@20, 14.727%@100, Time: 4.092s
Save model to checkpoints\LightGCN_BPRTrainer_LGCNDataset_10.629.pth
Epoch 12/1500, Loss: 0.076153, Time: 86.606s
Test result. Precision: 3.852%@20, 1.693%@100, Recall: 12.267%@20, 26.391%@100, NDCG: 10.723%@20, 14.857%@100, Time: 4.332s
Save model to checkpoints\LightGCN_BPRTrainer_LGCNDataset_10.723.pth
Epoch 13/1500, Loss: 0.073822, Time: 84.323s
Test result. Precision: 3.888%@20, 1.705%@100, Recall: 12.374%@20, 26.630%@100, NDCG: 10.823%@20, 14.993%@100, Time: 4.214s
Save model to checkpoints\LightGCN_BPRTrainer_LGCNDataset_10.823.pth
Epoch 14/1500, Loss: 0.072221, Time: 83.376s
Test result. Precision: 3.923%@20, 1.718%@100, Recall: 12.493%@20, 26.862%@100, NDCG: 10.912%@20, 15.114%@100, Time: 4.015s
Save model to checkpoints\LightGCN_BPRTrainer_LGCNDataset_10.912.pth
Epoch 15/1500, Loss: 0.069895, Time: 83.739s
Test result. Precision: 3.961%@20, 1.733%@100, Recall: 12.612%@20, 27.098%@100, NDCG: 11.006%@20, 15.240%@100, Time: 4.030s
Save model to checkpoints\LightGCN_BPRTrainer_LGCNDataset_11.006.pth
Epoch 16/1500, Loss: 0.068305, Time: 83.365s
Test result. Precision: 3.990%@20, 1.747%@100, Recall: 12.723%@20, 27.310%@100, NDCG: 11.085%@20, 15.351%@100, Time: 4.030s
Save model to checkpoints\LightGCN_BPRTrainer_LGCNDataset_11.085.pth
Epoch 17/1500, Loss: 0.065651, Time: 84.394s
Test result. Precision: 4.018%@20, 1.761%@100, Recall: 12.787%@20, 27.549%@100, NDCG: 11.155%@20, 15.470%@100, Time: 4.296s
Save model to checkpoints\LightGCN_BPRTrainer_LGCNDataset_11.155.pth
Epoch 18/1500, Loss: 0.065091, Time: 84.671s
Test result. Precision: 4.049%@20, 1.773%@100, Recall: 12.912%@20, 27.748%@100, NDCG: 11.245%@20, 15.584%@100, Time: 4.093s
Save model to checkpoints\LightGCN_BPRTrainer_LGCNDataset_11.245.pth
Epoch 19/1500, Loss: 0.063967, Time: 83.168s
Test result. Precision: 4.075%@20, 1.785%@100, Recall: 12.991%@20, 27.966%@100, NDCG: 11.314%@20, 15.693%@100, Time: 4.046s
Save model to checkpoints\LightGCN_BPRTrainer_LGCNDataset_11.314.pth
Epoch 20/1500, Loss: 0.062310, Time: 83.309s
Test result. Precision: 4.107%@20, 1.800%@100, Recall: 13.093%@20, 28.210%@100, NDCG: 11.397%@20, 15.815%@100, Time: 4.140s
Save model to checkpoints\LightGCN_BPRTrainer_LGCNDataset_11.397.pth
Epoch 21/1500, Loss: 0.062165, Time: 83.902s
Test result. Precision: 4.127%@20, 1.813%@100, Recall: 13.186%@20, 28.417%@100, NDCG: 11.452%@20, 15.909%@100, Time: 4.280s
Save model to checkpoints\LightGCN_BPRTrainer_LGCNDataset_11.452.pth
Epoch 22/1500, Loss: 0.059951, Time: 83.512s
Test result. Precision: 4.155%@20, 1.824%@100, Recall: 13.279%@20, 28.617%@100, NDCG: 11.524%@20, 16.009%@100, Time: 3.983s
Save model to checkpoints\LightGCN_BPRTrainer_LGCNDataset_11.524.pth
Epoch 23/1500, Loss: 0.058697, Time: 83.152s
Test result. Precision: 4.180%@20, 1.836%@100, Recall: 13.349%@20, 28.818%@100, NDCG: 11.579%@20, 16.100%@100, Time: 4.249s
Save model to checkpoints\LightGCN_BPRTrainer_LGCNDataset_11.579.pth
Epoch 24/1500, Loss: 0.058282, Time: 83.059s
Test result. Precision: 4.206%@20, 1.846%@100, Recall: 13.435%@20, 28.976%@100, NDCG: 11.651%@20, 16.194%@100, Time: 4.030s
Save model to checkpoints\LightGCN_BPRTrainer_LGCNDataset_11.651.pth
Epoch 25/1500, Loss: 0.057192, Time: 83.402s
Test result. Precision: 4.224%@20, 1.854%@100, Recall: 13.501%@20, 29.147%@100, NDCG: 11.701%@20, 16.274%@100, Time: 4.202s
Save model to checkpoints\LightGCN_BPRTrainer_LGCNDataset_11.701.pth
Epoch 26/1500, Loss: 0.055394, Time: 83.137s
Test result. Precision: 4.259%@20, 1.864%@100, Recall: 13.620%@20, 29.295%@100, NDCG: 11.782%@20, 16.362%@100, Time: 3.999s
Save model to checkpoints\LightGCN_BPRTrainer_LGCNDataset_11.782.pth
Epoch 27/1500, Loss: 0.055034, Time: 84.125s
Test result. Precision: 4.277%@20, 1.874%@100, Recall: 13.687%@20, 29.458%@100, NDCG: 11.845%@20, 16.455%@100, Time: 4.140s
Save model to checkpoints\LightGCN_BPRTrainer_LGCNDataset_11.845.pth
Epoch 28/1500, Loss: 0.054173, Time: 83.324s
Test result. Precision: 4.299%@20, 1.883%@100, Recall: 13.769%@20, 29.622%@100, NDCG: 11.901%@20, 16.536%@100, Time: 4.140s
Save model to checkpoints\LightGCN_BPRTrainer_LGCNDataset_11.901.pth
Epoch 29/1500, Loss: 0.052633, Time: 83.574s
Test result. Precision: 4.323%@20, 1.891%@100, Recall: 13.840%@20, 29.723%@100, NDCG: 11.957%@20, 16.603%@100, Time: 4.327s
Save model to checkpoints\LightGCN_BPRTrainer_LGCNDataset_11.957.pth
Epoch 30/1500, Loss: 0.051965, Time: 83.808s
Test result. Precision: 4.333%@20, 1.896%@100, Recall: 13.874%@20, 29.834%@100, NDCG: 11.995%@20, 16.664%@100, Time: 4.140s
Save model to checkpoints\LightGCN_BPRTrainer_LGCNDataset_11.995.pth
Epoch 31/1500, Loss: 0.051526, Time: 83.438s
Test result. Precision: 4.355%@20, 1.905%@100, Recall: 13.962%@20, 29.988%@100, NDCG: 12.059%@20, 16.745%@100, Time: 3.983s
Save model to checkpoints\LightGCN_BPRTrainer_LGCNDataset_12.059.pth
Epoch 32/1500, Loss: 0.050435, Time: 83.672s
Test result. Precision: 4.378%@20, 1.912%@100, Recall: 14.044%@20, 30.082%@100, NDCG: 12.117%@20, 16.808%@100, Time: 4.046s
Save model to checkpoints\LightGCN_BPRTrainer_LGCNDataset_12.117.pth
Epoch 33/1500, Loss: 0.049767, Time: 83.449s
Test result. Precision: 4.382%@20, 1.918%@100, Recall: 14.053%@20, 30.175%@100, NDCG: 12.140%@20, 16.860%@100, Time: 4.233s
Save model to checkpoints\LightGCN_BPRTrainer_LGCNDataset_12.140.pth
Epoch 34/1500, Loss: 0.049447, Time: 83.012s
Test result. Precision: 4.394%@20, 1.926%@100, Recall: 14.099%@20, 30.320%@100, NDCG: 12.179%@20, 16.927%@100, Time: 3.983s
Save model to checkpoints\LightGCN_BPRTrainer_LGCNDataset_12.179.pth
Epoch 35/1500, Loss: 0.048366, Time: 83.184s
Test result. Precision: 4.409%@20, 1.932%@100, Recall: 14.151%@20, 30.427%@100, NDCG: 12.215%@20, 16.980%@100, Time: 4.140s
Save model to checkpoints\LightGCN_BPRTrainer_LGCNDataset_12.215.pth
Epoch 36/1500, Loss: 0.048256, Time: 83.434s
Test result. Precision: 4.426%@20, 1.939%@100, Recall: 14.202%@20, 30.533%@100, NDCG: 12.262%@20, 17.045%@100, Time: 4.124s
Save model to checkpoints\LightGCN_BPRTrainer_LGCNDataset_12.262.pth
Epoch 37/1500, Loss: 0.047849, Time: 83.715s
Test result. Precision: 4.441%@20, 1.946%@100, Recall: 14.261%@20, 30.668%@100, NDCG: 12.301%@20, 17.104%@100, Time: 3.968s
Save model to checkpoints\LightGCN_BPRTrainer_LGCNDataset_12.301.pth
Epoch 38/1500, Loss: 0.046734, Time: 83.473s
Test result. Precision: 4.447%@20, 1.952%@100, Recall: 14.290%@20, 30.768%@100, NDCG: 12.336%@20, 17.162%@100, Time: 3.999s
Save model to checkpoints\LightGCN_BPRTrainer_LGCNDataset_12.336.pth
Epoch 39/1500, Loss: 0.046629, Time: 83.699s
Test result. Precision: 4.455%@20, 1.956%@100, Recall: 14.330%@20, 30.842%@100, NDCG: 12.363%@20, 17.203%@100, Time: 4.015s
Save model to checkpoints\LightGCN_BPRTrainer_LGCNDataset_12.363.pth
Epoch 40/1500, Loss: 0.045912, Time: 83.059s
Test result. Precision: 4.466%@20, 1.961%@100, Recall: 14.367%@20, 30.923%@100, NDCG: 12.412%@20, 17.267%@100, Time: 4.046s
Save model to checkpoints\LightGCN_BPRTrainer_LGCNDataset_12.412.pth
Epoch 41/1500, Loss: 0.044892, Time: 83.684s
Test result. Precision: 4.482%@20, 1.966%@100, Recall: 14.425%@20, 30.994%@100, NDCG: 12.450%@20, 17.309%@100, Time: 4.015s
Save model to checkpoints\LightGCN_BPRTrainer_LGCNDataset_12.450.pth
Epoch 42/1500, Loss: 0.044928, Time: 83.269s
Test result. Precision: 4.490%@20, 1.971%@100, Recall: 14.451%@20, 31.088%@100, NDCG: 12.479%@20, 17.359%@100, Time: 4.140s
Save model to checkpoints\LightGCN_BPRTrainer_LGCNDataset_12.479.pth
Epoch 43/1500, Loss: 0.044646, Time: 83.262s
Test result. Precision: 4.507%@20, 1.976%@100, Recall: 14.500%@20, 31.160%@100, NDCG: 12.517%@20, 17.404%@100, Time: 4.155s
Save model to checkpoints\LightGCN_BPRTrainer_LGCNDataset_12.517.pth
Epoch 44/1500, Loss: 0.044572, Time: 83.012s
Test result. Precision: 4.518%@20, 1.982%@100, Recall: 14.526%@20, 31.264%@100, NDCG: 12.546%@20, 17.456%@100, Time: 4.140s
Save model to checkpoints\LightGCN_BPRTrainer_LGCNDataset_12.546.pth
Epoch 45/1500, Loss: 0.043475, Time: 83.300s
Test result. Precision: 4.533%@20, 1.987%@100, Recall: 14.594%@20, 31.347%@100, NDCG: 12.590%@20, 17.506%@100, Time: 4.046s
Save model to checkpoints\LightGCN_BPRTrainer_LGCNDataset_12.590.pth
Epoch 46/1500, Loss: 0.042728, Time: 83.387s
Test result. Precision: 4.548%@20, 1.992%@100, Recall: 14.641%@20, 31.413%@100, NDCG: 12.621%@20, 17.543%@100, Time: 4.140s
Save model to checkpoints\LightGCN_BPRTrainer_LGCNDataset_12.621.pth
Epoch 47/1500, Loss: 0.042828, Time: 83.933s
Test result. Precision: 4.558%@20, 2.000%@100, Recall: 14.693%@20, 31.548%@100, NDCG: 12.670%@20, 17.617%@100, Time: 4.015s
Save model to checkpoints\LightGCN_BPRTrainer_LGCNDataset_12.670.pth
Epoch 48/1500, Loss: 0.042163, Time: 83.355s
Test result. Precision: 4.563%@20, 2.002%@100, Recall: 14.706%@20, 31.596%@100, NDCG: 12.688%@20, 17.647%@100, Time: 4.140s
Save model to checkpoints\LightGCN_BPRTrainer_LGCNDataset_12.688.pth
Epoch 49/1500, Loss: 0.041832, Time: 83.074s
Test result. Precision: 4.580%@20, 2.008%@100, Recall: 14.768%@20, 31.703%@100, NDCG: 12.733%@20, 17.701%@100, Time: 4.124s
Save model to checkpoints\LightGCN_BPRTrainer_LGCNDataset_12.733.pth
Epoch 50/1500, Loss: 0.041658, Time: 84.199s
Test result. Precision: 4.591%@20, 2.012%@100, Recall: 14.808%@20, 31.767%@100, NDCG: 12.768%@20, 17.745%@100, Time: 4.358s
Save model to checkpoints\LightGCN_BPRTrainer_LGCNDataset_12.768.pth
Epoch 51/1500, Loss: 0.041702, Time: 82.981s
Test result. Precision: 4.601%@20, 2.014%@100, Recall: 14.854%@20, 31.814%@100, NDCG: 12.790%@20, 17.769%@100, Time: 3.999s
Save model to checkpoints\LightGCN_BPRTrainer_LGCNDataset_12.790.pth
Epoch 52/1500, Loss: 0.040789, Time: 83.621s
Test result. Precision: 4.612%@20, 2.017%@100, Recall: 14.895%@20, 31.885%@100, NDCG: 12.822%@20, 17.808%@100, Time: 4.124s
Save model to checkpoints\LightGCN_BPRTrainer_LGCNDataset_12.822.pth
Epoch 53/1500, Loss: 0.040342, Time: 83.324s
Test result. Precision: 4.619%@20, 2.021%@100, Recall: 14.915%@20, 31.943%@100, NDCG: 12.846%@20, 17.844%@100, Time: 4.249s
Save model to checkpoints\LightGCN_BPRTrainer_LGCNDataset_12.846.pth
Epoch 54/1500, Loss: 0.041066, Time: 83.637s
Test result. Precision: 4.627%@20, 2.026%@100, Recall: 14.959%@20, 32.022%@100, NDCG: 12.886%@20, 17.896%@100, Time: 4.343s
Save model to checkpoints\LightGCN_BPRTrainer_LGCNDataset_12.886.pth
Epoch 55/1500, Loss: 0.040004, Time: 83.208s
Test result. Precision: 4.637%@20, 2.030%@100, Recall: 14.993%@20, 32.088%@100, NDCG: 12.913%@20, 17.933%@100, Time: 4.124s
Save model to checkpoints\LightGCN_BPRTrainer_LGCNDataset_12.913.pth
Epoch 56/1500, Loss: 0.040039, Time: 83.527s
Test result. Precision: 4.649%@20, 2.036%@100, Recall: 15.024%@20, 32.181%@100, NDCG: 12.942%@20, 17.980%@100, Time: 4.093s
Save model to checkpoints\LightGCN_BPRTrainer_LGCNDataset_12.942.pth
Epoch 57/1500, Loss: 0.039523, Time: 83.949s
Test result. Precision: 4.661%@20, 2.040%@100, Recall: 15.063%@20, 32.237%@100, NDCG: 12.975%@20, 18.017%@100, Time: 4.155s
Save model to checkpoints\LightGCN_BPRTrainer_LGCNDataset_12.975.pth
Epoch 58/1500, Loss: 0.038639, Time: 82.949s
Test result. Precision: 4.667%@20, 2.041%@100, Recall: 15.085%@20, 32.271%@100, NDCG: 12.991%@20, 18.037%@100, Time: 3.999s
Save model to checkpoints\LightGCN_BPRTrainer_LGCNDataset_12.991.pth
Epoch 59/1500, Loss: 0.038712, Time: 84.181s
Test result. Precision: 4.669%@20, 2.045%@100, Recall: 15.099%@20, 32.332%@100, NDCG: 13.010%@20, 18.074%@100, Time: 3.999s
Save model to checkpoints\LightGCN_BPRTrainer_LGCNDataset_13.010.pth
Epoch 60/1500, Loss: 0.038134, Time: 83.121s
Test result. Precision: 4.684%@20, 2.049%@100, Recall: 15.144%@20, 32.391%@100, NDCG: 13.039%@20, 18.104%@100, Time: 4.311s
Save model to checkpoints\LightGCN_BPRTrainer_LGCNDataset_13.039.pth
Epoch 61/1500, Loss: 0.037735, Time: 84.043s
Test result. Precision: 4.691%@20, 2.052%@100, Recall: 15.181%@20, 32.426%@100, NDCG: 13.068%@20, 18.135%@100, Time: 3.983s
Save model to checkpoints\LightGCN_BPRTrainer_LGCNDataset_13.068.pth
Epoch 62/1500, Loss: 0.037914, Time: 83.874s
Test result. Precision: 4.707%@20, 2.056%@100, Recall: 15.232%@20, 32.494%@100, NDCG: 13.110%@20, 18.181%@100, Time: 4.124s
Save model to checkpoints\LightGCN_BPRTrainer_LGCNDataset_13.110.pth
Epoch 63/1500, Loss: 0.037049, Time: 85.291s
Test result. Precision: 4.714%@20, 2.057%@100, Recall: 15.268%@20, 32.523%@100, NDCG: 13.131%@20, 18.201%@100, Time: 4.218s
Save model to checkpoints\LightGCN_BPRTrainer_LGCNDataset_13.131.pth
Epoch 64/1500, Loss: 0.037094, Time: 85.513s
Test result. Precision: 4.725%@20, 2.062%@100, Recall: 15.311%@20, 32.607%@100, NDCG: 13.165%@20, 18.247%@100, Time: 4.077s
Save model to checkpoints\LightGCN_BPRTrainer_LGCNDataset_13.165.pth
Epoch 65/1500, Loss: 0.036733, Time: 84.168s
Test result. Precision: 4.728%@20, 2.067%@100, Recall: 15.316%@20, 32.661%@100, NDCG: 13.175%@20, 18.276%@100, Time: 3.992s
Save model to checkpoints\LightGCN_BPRTrainer_LGCNDataset_13.175.pth
Epoch 66/1500, Loss: 0.036842, Time: 85.074s
Test result. Precision: 4.734%@20, 2.070%@100, Recall: 15.337%@20, 32.716%@100, NDCG: 13.198%@20, 18.311%@100, Time: 4.218s
Save model to checkpoints\LightGCN_BPRTrainer_LGCNDataset_13.198.pth
Epoch 67/1500, Loss: 0.036618, Time: 85.261s
Test result. Precision: 4.748%@20, 2.074%@100, Recall: 15.391%@20, 32.770%@100, NDCG: 13.231%@20, 18.342%@100, Time: 4.296s
Save model to checkpoints\LightGCN_BPRTrainer_LGCNDataset_13.231.pth
Epoch 68/1500, Loss: 0.036090, Time: 85.126s
Test result. Precision: 4.759%@20, 2.076%@100, Recall: 15.432%@20, 32.807%@100, NDCG: 13.263%@20, 18.374%@100, Time: 4.350s
Save model to checkpoints\LightGCN_BPRTrainer_LGCNDataset_13.263.pth
Epoch 69/1500, Loss: 0.035940, Time: 85.154s
Test result. Precision: 4.769%@20, 2.080%@100, Recall: 15.462%@20, 32.898%@100, NDCG: 13.291%@20, 18.417%@100, Time: 4.140s
Save model to checkpoints\LightGCN_BPRTrainer_LGCNDataset_13.291.pth
Epoch 70/1500, Loss: 0.035108, Time: 85.234s
Test result. Precision: 4.770%@20, 2.085%@100, Recall: 15.469%@20, 32.963%@100, NDCG: 13.297%@20, 18.445%@100, Time: 4.077s
Save model to checkpoints\LightGCN_BPRTrainer_LGCNDataset_13.297.pth
Epoch 71/1500, Loss: 0.035129, Time: 84.183s
Test result. Precision: 4.786%@20, 2.087%@100, Recall: 15.515%@20, 33.001%@100, NDCG: 13.321%@20, 18.464%@100, Time: 4.218s
Save model to checkpoints\LightGCN_BPRTrainer_LGCNDataset_13.321.pth
Epoch 72/1500, Loss: 0.034854, Time: 84.106s
Test result. Precision: 4.793%@20, 2.090%@100, Recall: 15.543%@20, 33.060%@100, NDCG: 13.344%@20, 18.495%@100, Time: 4.093s
Save model to checkpoints\LightGCN_BPRTrainer_LGCNDataset_13.344.pth
Epoch 73/1500, Loss: 0.034743, Time: 83.595s
Test result. Precision: 4.794%@20, 2.094%@100, Recall: 15.552%@20, 33.115%@100, NDCG: 13.360%@20, 18.528%@100, Time: 3.999s
Save model to checkpoints\LightGCN_BPRTrainer_LGCNDataset_13.360.pth
Epoch 74/1500, Loss: 0.034582, Time: 83.355s
Test result. Precision: 4.801%@20, 2.099%@100, Recall: 15.574%@20, 33.204%@100, NDCG: 13.384%@20, 18.570%@100, Time: 4.124s
Save model to checkpoints\LightGCN_BPRTrainer_LGCNDataset_13.384.pth
Epoch 75/1500, Loss: 0.034151, Time: 83.309s
Test result. Precision: 4.808%@20, 2.102%@100, Recall: 15.614%@20, 33.259%@100, NDCG: 13.408%@20, 18.599%@100, Time: 4.249s
Save model to checkpoints\LightGCN_BPRTrainer_LGCNDataset_13.408.pth
Epoch 76/1500, Loss: 0.034133, Time: 82.704s
Test result. Precision: 4.817%@20, 2.105%@100, Recall: 15.633%@20, 33.315%@100, NDCG: 13.430%@20, 18.630%@100, Time: 4.030s
Save model to checkpoints\LightGCN_BPRTrainer_LGCNDataset_13.430.pth
Epoch 77/1500, Loss: 0.033569, Time: 82.699s
Test result. Precision: 4.828%@20, 2.106%@100, Recall: 15.680%@20, 33.336%@100, NDCG: 13.451%@20, 18.642%@100, Time: 3.968s
Save model to checkpoints\LightGCN_BPRTrainer_LGCNDataset_13.451.pth
Epoch 78/1500, Loss: 0.033399, Time: 84.012s
Test result. Precision: 4.834%@20, 2.110%@100, Recall: 15.698%@20, 33.419%@100, NDCG: 13.469%@20, 18.679%@100, Time: 4.155s
Save model to checkpoints\LightGCN_BPRTrainer_LGCNDataset_13.469.pth
Epoch 79/1500, Loss: 0.033112, Time: 82.848s
Test result. Precision: 4.837%@20, 2.113%@100, Recall: 15.712%@20, 33.464%@100, NDCG: 13.484%@20, 18.706%@100, Time: 4.108s
Save model to checkpoints\LightGCN_BPRTrainer_LGCNDataset_13.484.pth
Epoch 80/1500, Loss: 0.033365, Time: 82.871s
Test result. Precision: 4.837%@20, 2.116%@100, Recall: 15.712%@20, 33.520%@100, NDCG: 13.492%@20, 18.731%@100, Time: 3.968s
Save model to checkpoints\LightGCN_BPRTrainer_LGCNDataset_13.492.pth
Epoch 81/1500, Loss: 0.033230, Time: 83.949s
Test result. Precision: 4.844%@20, 2.118%@100, Recall: 15.737%@20, 33.537%@100, NDCG: 13.508%@20, 18.748%@100, Time: 4.452s
Save model to checkpoints\LightGCN_BPRTrainer_LGCNDataset_13.508.pth
Epoch 82/1500, Loss: 0.032544, Time: 84.256s
Test result. Precision: 4.846%@20, 2.119%@100, Recall: 15.745%@20, 33.540%@100, NDCG: 13.519%@20, 18.761%@100, Time: 3.968s
Save model to checkpoints\LightGCN_BPRTrainer_LGCNDataset_13.519.pth
Epoch 83/1500, Loss: 0.032600, Time: 82.699s
Test result. Precision: 4.854%@20, 2.122%@100, Recall: 15.775%@20, 33.608%@100, NDCG: 13.529%@20, 18.781%@100, Time: 3.999s
Save model to checkpoints\LightGCN_BPRTrainer_LGCNDataset_13.529.pth
Epoch 84/1500, Loss: 0.032784, Time: 83.059s
Test result. Precision: 4.861%@20, 2.126%@100, Recall: 15.793%@20, 33.692%@100, NDCG: 13.544%@20, 18.812%@100, Time: 3.999s
Save model to checkpoints\LightGCN_BPRTrainer_LGCNDataset_13.544.pth
Epoch 85/1500, Loss: 0.032157, Time: 83.074s
Test result. Precision: 4.869%@20, 2.130%@100, Recall: 15.835%@20, 33.727%@100, NDCG: 13.574%@20, 18.842%@100, Time: 3.983s
Save model to checkpoints\LightGCN_BPRTrainer_LGCNDataset_13.574.pth
Epoch 86/1500, Loss: 0.031909, Time: 83.256s
Test result. Precision: 4.874%@20, 2.134%@100, Recall: 15.855%@20, 33.796%@100, NDCG: 13.587%@20, 18.870%@100, Time: 4.046s
Save model to checkpoints\LightGCN_BPRTrainer_LGCNDataset_13.587.pth
Epoch 87/1500, Loss: 0.031774, Time: 82.746s
Test result. Precision: 4.885%@20, 2.135%@100, Recall: 15.889%@20, 33.826%@100, NDCG: 13.607%@20, 18.886%@100, Time: 4.108s
Save model to checkpoints\LightGCN_BPRTrainer_LGCNDataset_13.607.pth
Epoch 88/1500, Loss: 0.031791, Time: 82.637s
Test result. Precision: 4.890%@20, 2.141%@100, Recall: 15.912%@20, 33.899%@100, NDCG: 13.625%@20, 18.920%@100, Time: 4.015s
Save model to checkpoints\LightGCN_BPRTrainer_LGCNDataset_13.625.pth
Epoch 89/1500, Loss: 0.031638, Time: 83.053s
Test result. Precision: 4.903%@20, 2.143%@100, Recall: 15.965%@20, 33.937%@100, NDCG: 13.661%@20, 18.952%@100, Time: 3.983s
Save model to checkpoints\LightGCN_BPRTrainer_LGCNDataset_13.661.pth
Epoch 90/1500, Loss: 0.030924, Time: 83.246s
Test result. Precision: 4.913%@20, 2.146%@100, Recall: 16.007%@20, 33.955%@100, NDCG: 13.690%@20, 18.977%@100, Time: 4.311s
Save model to checkpoints\LightGCN_BPRTrainer_LGCNDataset_13.690.pth
Epoch 91/1500, Loss: 0.031064, Time: 83.949s
Test result. Precision: 4.916%@20, 2.147%@100, Recall: 16.003%@20, 33.992%@100, NDCG: 13.692%@20, 18.990%@100, Time: 4.124s
Save model to checkpoints\LightGCN_BPRTrainer_LGCNDataset_13.692.pth
Epoch 92/1500, Loss: 0.030831, Time: 83.996s
Test result. Precision: 4.928%@20, 2.147%@100, Recall: 16.027%@20, 33.994%@100, NDCG: 13.708%@20, 18.998%@100, Time: 4.077s
Save model to checkpoints\LightGCN_BPRTrainer_LGCNDataset_13.708.pth
Epoch 93/1500, Loss: 0.030606, Time: 84.549s
Test result. Precision: 4.934%@20, 2.150%@100, Recall: 16.045%@20, 34.058%@100, NDCG: 13.721%@20, 19.023%@100, Time: 4.218s
Save model to checkpoints\LightGCN_BPRTrainer_LGCNDataset_13.721.pth
Epoch 94/1500, Loss: 0.030323, Time: 84.355s
Test result. Precision: 4.944%@20, 2.153%@100, Recall: 16.086%@20, 34.093%@100, NDCG: 13.751%@20, 19.052%@100, Time: 4.358s
Save model to checkpoints\LightGCN_BPRTrainer_LGCNDataset_13.751.pth
Epoch 95/1500, Loss: 0.029901, Time: 84.293s
Test result. Precision: 4.950%@20, 2.155%@100, Recall: 16.106%@20, 34.128%@100, NDCG: 13.763%@20, 19.068%@100, Time: 4.327s
Save model to checkpoints\LightGCN_BPRTrainer_LGCNDataset_13.763.pth
Epoch 96/1500, Loss: 0.030089, Time: 84.055s
Test result. Precision: 4.960%@20, 2.158%@100, Recall: 16.151%@20, 34.173%@100, NDCG: 13.787%@20, 19.091%@100, Time: 4.405s
Save model to checkpoints\LightGCN_BPRTrainer_LGCNDataset_13.787.pth
Epoch 97/1500, Loss: 0.029656, Time: 84.418s
Test result. Precision: 4.960%@20, 2.160%@100, Recall: 16.142%@20, 34.220%@100, NDCG: 13.801%@20, 19.124%@100, Time: 4.249s
Save model to checkpoints\LightGCN_BPRTrainer_LGCNDataset_13.801.pth
Epoch 98/1500, Loss: 0.029384, Time: 82.621s
Test result. Precision: 4.962%@20, 2.160%@100, Recall: 16.148%@20, 34.220%@100, NDCG: 13.813%@20, 19.135%@100, Time: 4.015s
Save model to checkpoints\LightGCN_BPRTrainer_LGCNDataset_13.813.pth
Epoch 99/1500, Loss: 0.029746, Time: 82.902s
Test result. Precision: 4.969%@20, 2.165%@100, Recall: 16.177%@20, 34.276%@100, NDCG: 13.826%@20, 19.157%@100, Time: 4.108s
Save model to checkpoints\LightGCN_BPRTrainer_LGCNDataset_13.826.pth
Epoch 100/1500, Loss: 0.029934, Time: 83.880s
Test result. Precision: 4.974%@20, 2.167%@100, Recall: 16.186%@20, 34.298%@100, NDCG: 13.842%@20, 19.179%@100, Time: 4.202s
Save model to checkpoints\LightGCN_BPRTrainer_LGCNDataset_13.842.pth
Epoch 101/1500, Loss: 0.029204, Time: 84.246s
Test result. Precision: 4.977%@20, 2.168%@100, Recall: 16.204%@20, 34.327%@100, NDCG: 13.859%@20, 19.200%@100, Time: 4.202s
Save model to checkpoints\LightGCN_BPRTrainer_LGCNDataset_13.859.pth
Epoch 102/1500, Loss: 0.029282, Time: 83.980s
Test result. Precision: 4.987%@20, 2.171%@100, Recall: 16.250%@20, 34.396%@100, NDCG: 13.890%@20, 19.234%@100, Time: 4.280s
Save model to checkpoints\LightGCN_BPRTrainer_LGCNDataset_13.890.pth
Epoch 103/1500, Loss: 0.029222, Time: 84.380s
Test result. Precision: 4.989%@20, 2.173%@100, Recall: 16.254%@20, 34.426%@100, NDCG: 13.885%@20, 19.238%@100, Time: 4.233s
Save model to checkpoints\LightGCN_BPRTrainer_LGCNDataset_13.885.pth
Epoch 104/1500, Loss: 0.029051, Time: 84.480s
Test result. Precision: 4.999%@20, 2.175%@100, Recall: 16.291%@20, 34.462%@100, NDCG: 13.919%@20, 19.271%@100, Time: 4.202s
Save model to checkpoints\LightGCN_BPRTrainer_LGCNDataset_13.919.pth
Epoch 105/1500, Loss: 0.029054, Time: 84.730s
Test result. Precision: 5.005%@20, 2.178%@100, Recall: 16.310%@20, 34.492%@100, NDCG: 13.939%@20, 19.299%@100, Time: 4.249s
Save model to checkpoints\LightGCN_BPRTrainer_LGCNDataset_13.939.pth
Epoch 106/1500, Loss: 0.028803, Time: 83.303s
Test result. Precision: 5.011%@20, 2.182%@100, Recall: 16.311%@20, 34.564%@100, NDCG: 13.947%@20, 19.325%@100, Time: 4.077s
Save model to checkpoints\LightGCN_BPRTrainer_LGCNDataset_13.947.pth
Epoch 107/1500, Loss: 0.028928, Time: 82.965s
Test result. Precision: 5.021%@20, 2.183%@100, Recall: 16.344%@20, 34.584%@100, NDCG: 13.964%@20, 19.334%@100, Time: 4.030s
Save model to checkpoints\LightGCN_BPRTrainer_LGCNDataset_13.964.pth
Epoch 108/1500, Loss: 0.028809, Time: 82.704s
Test result. Precision: 5.020%@20, 2.186%@100, Recall: 16.332%@20, 34.635%@100, NDCG: 13.965%@20, 19.356%@100, Time: 3.983s
Save model to checkpoints\LightGCN_BPRTrainer_LGCNDataset_13.965.pth
Epoch 109/1500, Loss: 0.028066, Time: 82.949s
Test result. Precision: 5.036%@20, 2.189%@100, Recall: 16.398%@20, 34.665%@100, NDCG: 14.010%@20, 19.389%@100, Time: 4.124s
Save model to checkpoints\LightGCN_BPRTrainer_LGCNDataset_14.010.pth
Epoch 110/1500, Loss: 0.028183, Time: 83.793s
Test result. Precision: 5.038%@20, 2.190%@100, Recall: 16.407%@20, 34.690%@100, NDCG: 14.017%@20, 19.401%@100, Time: 4.296s
Save model to checkpoints\LightGCN_BPRTrainer_LGCNDataset_14.017.pth
Epoch 111/1500, Loss: 0.028019, Time: 84.277s
Test result. Precision: 5.044%@20, 2.194%@100, Recall: 16.422%@20, 34.757%@100, NDCG: 14.029%@20, 19.427%@100, Time: 4.311s
Save model to checkpoints\LightGCN_BPRTrainer_LGCNDataset_14.029.pth
Epoch 112/1500, Loss: 0.027955, Time: 83.949s
Test result. Precision: 5.045%@20, 2.194%@100, Recall: 16.423%@20, 34.757%@100, NDCG: 14.036%@20, 19.438%@100, Time: 4.405s
Save model to checkpoints\LightGCN_BPRTrainer_LGCNDataset_14.036.pth
Epoch 113/1500, Loss: 0.027951, Time: 84.777s
Test result. Precision: 5.049%@20, 2.195%@100, Recall: 16.437%@20, 34.793%@100, NDCG: 14.049%@20, 19.456%@100, Time: 4.374s
Save model to checkpoints\LightGCN_BPRTrainer_LGCNDataset_14.049.pth
Epoch 114/1500, Loss: 0.027603, Time: 84.682s
Test result. Precision: 5.052%@20, 2.197%@100, Recall: 16.453%@20, 34.821%@100, NDCG: 14.062%@20, 19.472%@100, Time: 4.374s
Save model to checkpoints\LightGCN_BPRTrainer_LGCNDataset_14.062.pth
Epoch 115/1500, Loss: 0.027279, Time: 84.902s
Test result. Precision: 5.047%@20, 2.197%@100, Recall: 16.428%@20, 34.832%@100, NDCG: 14.065%@20, 19.486%@100, Time: 4.233s
Save model to checkpoints\LightGCN_BPRTrainer_LGCNDataset_14.065.pth
Epoch 116/1500, Loss: 0.027239, Time: 84.137s
Test result. Precision: 5.058%@20, 2.200%@100, Recall: 16.465%@20, 34.880%@100, NDCG: 14.082%@20, 19.504%@100, Time: 4.233s
Save model to checkpoints\LightGCN_BPRTrainer_LGCNDataset_14.082.pth
Epoch 117/1500, Loss: 0.027248, Time: 84.122s
Test result. Precision: 5.072%@20, 2.204%@100, Recall: 16.517%@20, 34.924%@100, NDCG: 14.105%@20, 19.522%@100, Time: 4.311s
Save model to checkpoints\LightGCN_BPRTrainer_LGCNDataset_14.105.pth
Epoch 118/1500, Loss: 0.027209, Time: 83.902s
Test result. Precision: 5.076%@20, 2.206%@100, Recall: 16.523%@20, 34.965%@100, NDCG: 14.112%@20, 19.539%@100, Time: 4.218s
Save model to checkpoints\LightGCN_BPRTrainer_LGCNDataset_14.112.pth
Epoch 119/1500, Loss: 0.027144, Time: 84.511s
Test result. Precision: 5.087%@20, 2.207%@100, Recall: 16.545%@20, 34.979%@100, NDCG: 14.125%@20, 19.548%@100, Time: 4.233s
Save model to checkpoints\LightGCN_BPRTrainer_LGCNDataset_14.125.pth
Epoch 120/1500, Loss: 0.027075, Time: 83.855s
Test result. Precision: 5.083%@20, 2.207%@100, Recall: 16.537%@20, 34.989%@100, NDCG: 14.136%@20, 19.568%@100, Time: 4.124s
Save model to checkpoints\LightGCN_BPRTrainer_LGCNDataset_14.136.pth
Epoch 121/1500, Loss: 0.026832, Time: 84.308s
Test result. Precision: 5.089%@20, 2.208%@100, Recall: 16.559%@20, 34.994%@100, NDCG: 14.147%@20, 19.575%@100, Time: 4.171s
Save model to checkpoints\LightGCN_BPRTrainer_LGCNDataset_14.147.pth
Epoch 122/1500, Loss: 0.027168, Time: 84.199s
Test result. Precision: 5.092%@20, 2.212%@100, Recall: 16.554%@20, 35.066%@100, NDCG: 14.150%@20, 19.599%@100, Time: 4.140s
Save model to checkpoints\LightGCN_BPRTrainer_LGCNDataset_14.150.pth
Epoch 123/1500, Loss: 0.026482, Time: 84.183s
Test result. Precision: 5.095%@20, 2.214%@100, Recall: 16.577%@20, 35.079%@100, NDCG: 14.168%@20, 19.616%@100, Time: 4.108s
Save model to checkpoints\LightGCN_BPRTrainer_LGCNDataset_14.168.pth
Epoch 124/1500, Loss: 0.026824, Time: 83.793s
Test result. Precision: 5.098%@20, 2.214%@100, Recall: 16.594%@20, 35.085%@100, NDCG: 14.183%@20, 19.631%@100, Time: 4.249s
Save model to checkpoints\LightGCN_BPRTrainer_LGCNDataset_14.183.pth
Epoch 125/1500, Loss: 0.025997, Time: 83.762s
Test result. Precision: 5.110%@20, 2.217%@100, Recall: 16.637%@20, 35.109%@100, NDCG: 14.213%@20, 19.655%@100, Time: 4.124s
Save model to checkpoints\LightGCN_BPRTrainer_LGCNDataset_14.213.pth
Epoch 126/1500, Loss: 0.026716, Time: 84.012s
Test result. Precision: 5.118%@20, 2.220%@100, Recall: 16.645%@20, 35.147%@100, NDCG: 14.227%@20, 19.676%@100, Time: 4.124s
Save model to checkpoints\LightGCN_BPRTrainer_LGCNDataset_14.227.pth
Epoch 127/1500, Loss: 0.026518, Time: 84.659s
Test result. Precision: 5.123%@20, 2.222%@100, Recall: 16.666%@20, 35.187%@100, NDCG: 14.242%@20, 19.696%@100, Time: 4.218s
Save model to checkpoints\LightGCN_BPRTrainer_LGCNDataset_14.242.pth
Epoch 128/1500, Loss: 0.026293, Time: 83.594s
Test result. Precision: 5.122%@20, 2.223%@100, Recall: 16.668%@20, 35.214%@100, NDCG: 14.247%@20, 19.709%@100, Time: 4.124s
Save model to checkpoints\LightGCN_BPRTrainer_LGCNDataset_14.247.pth
Epoch 129/1500, Loss: 0.025850, Time: 83.855s
Test result. Precision: 5.121%@20, 2.223%@100, Recall: 16.659%@20, 35.214%@100, NDCG: 14.251%@20, 19.718%@100, Time: 4.124s
Save model to checkpoints\LightGCN_BPRTrainer_LGCNDataset_14.251.pth
Epoch 130/1500, Loss: 0.025585, Time: 83.621s
Test result. Precision: 5.125%@20, 2.225%@100, Recall: 16.682%@20, 35.251%@100, NDCG: 14.259%@20, 19.730%@100, Time: 4.280s
Save model to checkpoints\LightGCN_BPRTrainer_LGCNDataset_14.259.pth
Epoch 131/1500, Loss: 0.025459, Time: 83.656s
Test result. Precision: 5.122%@20, 2.227%@100, Recall: 16.674%@20, 35.287%@100, NDCG: 14.260%@20, 19.745%@100, Time: 4.202s
Save model to checkpoints\LightGCN_BPRTrainer_LGCNDataset_14.260.pth
Epoch 132/1500, Loss: 0.025871, Time: 82.528s
Test result. Precision: 5.131%@20, 2.228%@100, Recall: 16.701%@20, 35.292%@100, NDCG: 14.287%@20, 19.765%@100, Time: 4.124s
Save model to checkpoints\LightGCN_BPRTrainer_LGCNDataset_14.287.pth
Epoch 133/1500, Loss: 0.025580, Time: 83.012s
Test result. Precision: 5.131%@20, 2.228%@100, Recall: 16.702%@20, 35.294%@100, NDCG: 14.286%@20, 19.766%@100, Time: 3.968s
Save model to checkpoints\LightGCN_BPRTrainer_LGCNDataset_14.286.pth
Epoch 134/1500, Loss: 0.025514, Time: 83.542s
Test result. Precision: 5.140%@20, 2.229%@100, Recall: 16.734%@20, 35.294%@100, NDCG: 14.308%@20, 19.777%@100, Time: 3.983s
Save model to checkpoints\LightGCN_BPRTrainer_LGCNDataset_14.308.pth
Epoch 135/1500, Loss: 0.025514, Time: 83.106s
Test result. Precision: 5.147%@20, 2.230%@100, Recall: 16.765%@20, 35.315%@100, NDCG: 14.328%@20, 19.794%@100, Time: 4.062s
Save model to checkpoints\LightGCN_BPRTrainer_LGCNDataset_14.328.pth
Epoch 136/1500, Loss: 0.025314, Time: 83.512s
Test result. Precision: 5.148%@20, 2.233%@100, Recall: 16.780%@20, 35.348%@100, NDCG: 14.333%@20, 19.806%@100, Time: 3.999s
Save model to checkpoints\LightGCN_BPRTrainer_LGCNDataset_14.333.pth
Epoch 137/1500, Loss: 0.025392, Time: 82.623s
Test result. Precision: 5.152%@20, 2.233%@100, Recall: 16.779%@20, 35.355%@100, NDCG: 14.332%@20, 19.806%@100, Time: 4.187s
Save model to checkpoints\LightGCN_BPRTrainer_LGCNDataset_14.332.pth
Epoch 138/1500, Loss: 0.025433, Time: 82.762s
Test result. Precision: 5.155%@20, 2.233%@100, Recall: 16.788%@20, 35.370%@100, NDCG: 14.345%@20, 19.821%@100, Time: 4.062s
Save model to checkpoints\LightGCN_BPRTrainer_LGCNDataset_14.345.pth
Epoch 139/1500, Loss: 0.025051, Time: 82.652s
Test result. Precision: 5.161%@20, 2.237%@100, Recall: 16.814%@20, 35.413%@100, NDCG: 14.364%@20, 19.847%@100, Time: 4.124s
Save model to checkpoints\LightGCN_BPRTrainer_LGCNDataset_14.364.pth
Epoch 140/1500, Loss: 0.025253, Time: 82.668s
Test result. Precision: 5.157%@20, 2.237%@100, Recall: 16.803%@20, 35.411%@100, NDCG: 14.361%@20, 19.849%@100, Time: 4.265s
Save model to checkpoints\LightGCN_BPRTrainer_LGCNDataset_14.361.pth
Epoch 141/1500, Loss: 0.025005, Time: 82.777s
Test result. Precision: 5.160%@20, 2.238%@100, Recall: 16.827%@20, 35.445%@100, NDCG: 14.376%@20, 19.867%@100, Time: 3.983s
Save model to checkpoints\LightGCN_BPRTrainer_LGCNDataset_14.376.pth
Epoch 142/1500, Loss: 0.024967, Time: 82.590s
Test result. Precision: 5.165%@20, 2.240%@100, Recall: 16.845%@20, 35.456%@100, NDCG: 14.391%@20, 19.882%@100, Time: 4.218s
Save model to checkpoints\LightGCN_BPRTrainer_LGCNDataset_14.391.pth
Epoch 143/1500, Loss: 0.024930, Time: 82.731s
Test result. Precision: 5.173%@20, 2.241%@100, Recall: 16.858%@20, 35.478%@100, NDCG: 14.399%@20, 19.890%@100, Time: 4.015s
Save model to checkpoints\LightGCN_BPRTrainer_LGCNDataset_14.399.pth
Epoch 144/1500, Loss: 0.024604, Time: 83.527s
Test result. Precision: 5.174%@20, 2.244%@100, Recall: 16.856%@20, 35.531%@100, NDCG: 14.406%@20, 19.911%@100, Time: 4.030s
Save model to checkpoints\LightGCN_BPRTrainer_LGCNDataset_14.406.pth
Epoch 145/1500, Loss: 0.024857, Time: 82.652s
Test result. Precision: 5.181%@20, 2.243%@100, Recall: 16.877%@20, 35.524%@100, NDCG: 14.420%@20, 19.917%@100, Time: 3.999s
Save model to checkpoints\LightGCN_BPRTrainer_LGCNDataset_14.420.pth
Epoch 146/1500, Loss: 0.024962, Time: 83.621s
Test result. Precision: 5.189%@20, 2.246%@100, Recall: 16.900%@20, 35.579%@100, NDCG: 14.437%@20, 19.941%@100, Time: 3.983s
Save model to checkpoints\LightGCN_BPRTrainer_LGCNDataset_14.437.pth
Epoch 147/1500, Loss: 0.024390, Time: 82.981s
Test result. Precision: 5.195%@20, 2.247%@100, Recall: 16.914%@20, 35.594%@100, NDCG: 14.445%@20, 19.949%@100, Time: 3.992s
Save model to checkpoints\LightGCN_BPRTrainer_LGCNDataset_14.445.pth
Epoch 148/1500, Loss: 0.024256, Time: 82.543s
Test result. Precision: 5.190%@20, 2.248%@100, Recall: 16.901%@20, 35.614%@100, NDCG: 14.445%@20, 19.961%@100, Time: 4.015s
Save model to checkpoints\LightGCN_BPRTrainer_LGCNDataset_14.445.pth
Epoch 149/1500, Loss: 0.024623, Time: 83.106s
Test result. Precision: 5.205%@20, 2.250%@100, Recall: 16.952%@20, 35.615%@100, NDCG: 14.475%@20, 19.975%@100, Time: 4.077s
Save model to checkpoints\LightGCN_BPRTrainer_LGCNDataset_14.475.pth
Epoch 150/1500, Loss: 0.024421, Time: 83.043s
Test result. Precision: 5.212%@20, 2.252%@100, Recall: 16.968%@20, 35.654%@100, NDCG: 14.484%@20, 19.988%@100, Time: 4.140s
Save model to checkpoints\LightGCN_BPRTrainer_LGCNDataset_14.484.pth
Epoch 151/1500, Loss: 0.024108, Time: 83.027s
Test result. Precision: 5.204%@20, 2.253%@100, Recall: 16.939%@20, 35.651%@100, NDCG: 14.476%@20, 19.994%@100, Time: 4.030s
Save model to checkpoints\LightGCN_BPRTrainer_LGCNDataset_14.476.pth
Epoch 152/1500, Loss: 0.023899, Time: 83.027s
Test result. Precision: 5.209%@20, 2.253%@100, Recall: 16.964%@20, 35.672%@100, NDCG: 14.489%@20, 20.002%@100, Time: 3.983s
Save model to checkpoints\LightGCN_BPRTrainer_LGCNDataset_14.489.pth
Epoch 153/1500, Loss: 0.024227, Time: 83.184s
Test result. Precision: 5.214%@20, 2.258%@100, Recall: 16.977%@20, 35.737%@100, NDCG: 14.497%@20, 20.025%@100, Time: 4.140s
Save model to checkpoints\LightGCN_BPRTrainer_LGCNDataset_14.497.pth
Epoch 154/1500, Loss: 0.023582, Time: 82.715s
Test result. Precision: 5.220%@20, 2.260%@100, Recall: 16.992%@20, 35.780%@100, NDCG: 14.517%@20, 20.052%@100, Time: 4.233s
Save model to checkpoints\LightGCN_BPRTrainer_LGCNDataset_14.517.pth
Epoch 155/1500, Loss: 0.023608, Time: 83.430s
Test result. Precision: 5.226%@20, 2.261%@100, Recall: 17.004%@20, 35.798%@100, NDCG: 14.539%@20, 20.074%@100, Time: 3.968s
Save model to checkpoints\LightGCN_BPRTrainer_LGCNDataset_14.539.pth
Epoch 156/1500, Loss: 0.023286, Time: 83.078s
Test result. Precision: 5.228%@20, 2.260%@100, Recall: 17.025%@20, 35.797%@100, NDCG: 14.546%@20, 20.075%@100, Time: 4.062s
Save model to checkpoints\LightGCN_BPRTrainer_LGCNDataset_14.546.pth
Epoch 157/1500, Loss: 0.023524, Time: 83.168s
Test result. Precision: 5.225%@20, 2.260%@100, Recall: 17.009%@20, 35.775%@100, NDCG: 14.536%@20, 20.069%@100, Time: 4.124s
Save model to checkpoints\LightGCN_BPRTrainer_LGCNDataset_14.536.pth
Epoch 158/1500, Loss: 0.023476, Time: 82.918s
Test result. Precision: 5.231%@20, 2.261%@100, Recall: 17.034%@20, 35.797%@100, NDCG: 14.548%@20, 20.079%@100, Time: 4.265s
Save model to checkpoints\LightGCN_BPRTrainer_LGCNDataset_14.548.pth
Epoch 159/1500, Loss: 0.023485, Time: 82.652s
Test result. Precision: 5.236%@20, 2.263%@100, Recall: 17.050%@20, 35.826%@100, NDCG: 14.561%@20, 20.096%@100, Time: 4.030s
Save model to checkpoints\LightGCN_BPRTrainer_LGCNDataset_14.561.pth
Epoch 160/1500, Loss: 0.023814, Time: 83.512s
Test result. Precision: 5.236%@20, 2.262%@100, Recall: 17.077%@20, 35.811%@100, NDCG: 14.563%@20, 20.089%@100, Time: 4.218s
Save model to checkpoints\LightGCN_BPRTrainer_LGCNDataset_14.563.pth
Epoch 161/1500, Loss: 0.023454, Time: 82.559s
Test result. Precision: 5.240%@20, 2.264%@100, Recall: 17.071%@20, 35.841%@100, NDCG: 14.563%@20, 20.097%@100, Time: 4.093s
Save model to checkpoints\LightGCN_BPRTrainer_LGCNDataset_14.563.pth
Epoch 162/1500, Loss: 0.023481, Time: 82.606s
Test result. Precision: 5.250%@20, 2.265%@100, Recall: 17.085%@20, 35.860%@100, NDCG: 14.578%@20, 20.111%@100, Time: 4.155s
Save model to checkpoints\LightGCN_BPRTrainer_LGCNDataset_14.578.pth
Epoch 163/1500, Loss: 0.023343, Time: 83.059s
Test result. Precision: 5.252%@20, 2.267%@100, Recall: 17.093%@20, 35.903%@100, NDCG: 14.590%@20, 20.132%@100, Time: 4.124s
Save model to checkpoints\LightGCN_BPRTrainer_LGCNDataset_14.590.pth
Epoch 164/1500, Loss: 0.023564, Time: 82.637s
Test result. Precision: 5.250%@20, 2.269%@100, Recall: 17.097%@20, 35.926%@100, NDCG: 14.599%@20, 20.149%@100, Time: 4.187s
Save model to checkpoints\LightGCN_BPRTrainer_LGCNDataset_14.599.pth
Epoch 165/1500, Loss: 0.023288, Time: 82.762s
Test result. Precision: 5.254%@20, 2.268%@100, Recall: 17.108%@20, 35.911%@100, NDCG: 14.605%@20, 20.149%@100, Time: 4.265s
Save model to checkpoints\LightGCN_BPRTrainer_LGCNDataset_14.605.pth
Epoch 166/1500, Loss: 0.023303, Time: 82.606s
Test result. Precision: 5.254%@20, 2.269%@100, Recall: 17.102%@20, 35.923%@100, NDCG: 14.610%@20, 20.160%@100, Time: 4.015s
Save model to checkpoints\LightGCN_BPRTrainer_LGCNDataset_14.610.pth
Epoch 167/1500, Loss: 0.023217, Time: 82.527s
Test result. Precision: 5.262%@20, 2.269%@100, Recall: 17.111%@20, 35.940%@100, NDCG: 14.620%@20, 20.169%@100, Time: 3.999s
Save model to checkpoints\LightGCN_BPRTrainer_LGCNDataset_14.620.pth
Epoch 168/1500, Loss: 0.023077, Time: 82.897s
Test result. Precision: 5.259%@20, 2.269%@100, Recall: 17.104%@20, 35.953%@100, NDCG: 14.614%@20, 20.169%@100, Time: 4.218s
Save model to checkpoints\LightGCN_BPRTrainer_LGCNDataset_14.614.pth
Epoch 169/1500, Loss: 0.023306, Time: 82.574s
Test result. Precision: 5.269%@20, 2.272%@100, Recall: 17.137%@20, 35.985%@100, NDCG: 14.635%@20, 20.188%@100, Time: 4.108s
Save model to checkpoints\LightGCN_BPRTrainer_LGCNDataset_14.635.pth
Epoch 170/1500, Loss: 0.023086, Time: 82.605s
Test result. Precision: 5.267%@20, 2.273%@100, Recall: 17.125%@20, 35.998%@100, NDCG: 14.631%@20, 20.191%@100, Time: 3.999s
Save model to checkpoints\LightGCN_BPRTrainer_LGCNDataset_14.631.pth
Epoch 171/1500, Loss: 0.022869, Time: 82.934s
Test result. Precision: 5.266%@20, 2.274%@100, Recall: 17.138%@20, 35.998%@100, NDCG: 14.635%@20, 20.194%@100, Time: 4.155s
Save model to checkpoints\LightGCN_BPRTrainer_LGCNDataset_14.635.pth
Epoch 172/1500, Loss: 0.023012, Time: 82.481s
Test result. Precision: 5.265%@20, 2.273%@100, Recall: 17.128%@20, 35.999%@100, NDCG: 14.637%@20, 20.200%@100, Time: 4.093s
Save model to checkpoints\LightGCN_BPRTrainer_LGCNDataset_14.637.pth
Epoch 173/1500, Loss: 0.022802, Time: 82.621s
Test result. Precision: 5.269%@20, 2.276%@100, Recall: 17.127%@20, 36.039%@100, NDCG: 14.652%@20, 20.225%@100, Time: 4.202s
Save model to checkpoints\LightGCN_BPRTrainer_LGCNDataset_14.652.pth
Epoch 174/1500, Loss: 0.022628, Time: 83.027s
Test result. Precision: 5.276%@20, 2.274%@100, Recall: 17.168%@20, 35.998%@100, NDCG: 14.670%@20, 20.220%@100, Time: 4.202s
Save model to checkpoints\LightGCN_BPRTrainer_LGCNDataset_14.670.pth
Epoch 175/1500, Loss: 0.022559, Time: 83.043s
Test result. Precision: 5.271%@20, 2.275%@100, Recall: 17.142%@20, 36.026%@100, NDCG: 14.667%@20, 20.232%@100, Time: 4.015s
Save model to checkpoints\LightGCN_BPRTrainer_LGCNDataset_14.667.pth
Epoch 176/1500, Loss: 0.022807, Time: 82.587s
Test result. Precision: 5.277%@20, 2.276%@100, Recall: 17.183%@20, 36.032%@100, NDCG: 14.683%@20, 20.240%@100, Time: 3.968s
Save model to checkpoints\LightGCN_BPRTrainer_LGCNDataset_14.683.pth
Epoch 177/1500, Loss: 0.022716, Time: 82.668s
Test result. Precision: 5.274%@20, 2.277%@100, Recall: 17.172%@20, 36.049%@100, NDCG: 14.685%@20, 20.250%@100, Time: 4.030s
Save model to checkpoints\LightGCN_BPRTrainer_LGCNDataset_14.685.pth
Epoch 178/1500, Loss: 0.022566, Time: 82.496s
Test result. Precision: 5.283%@20, 2.278%@100, Recall: 17.193%@20, 36.063%@100, NDCG: 14.699%@20, 20.260%@100, Time: 3.937s
Save model to checkpoints\LightGCN_BPRTrainer_LGCNDataset_14.699.pth
Epoch 179/1500, Loss: 0.022667, Time: 82.494s
Test result. Precision: 5.292%@20, 2.279%@100, Recall: 17.220%@20, 36.087%@100, NDCG: 14.714%@20, 20.271%@100, Time: 4.015s
Save model to checkpoints\LightGCN_BPRTrainer_LGCNDataset_14.714.pth
Epoch 180/1500, Loss: 0.022840, Time: 82.496s
Test result. Precision: 5.296%@20, 2.281%@100, Recall: 17.225%@20, 36.107%@100, NDCG: 14.735%@20, 20.299%@100, Time: 4.093s
Save model to checkpoints\LightGCN_BPRTrainer_LGCNDataset_14.735.pth
Epoch 181/1500, Loss: 0.021844, Time: 82.796s
Test result. Precision: 5.304%@20, 2.285%@100, Recall: 17.258%@20, 36.143%@100, NDCG: 14.750%@20, 20.314%@100, Time: 4.015s
Save model to checkpoints\LightGCN_BPRTrainer_LGCNDataset_14.750.pth
Epoch 182/1500, Loss: 0.022244, Time: 82.653s
Test result. Precision: 5.303%@20, 2.287%@100, Recall: 17.256%@20, 36.190%@100, NDCG: 14.740%@20, 20.318%@100, Time: 4.062s
Save model to checkpoints\LightGCN_BPRTrainer_LGCNDataset_14.740.pth
Epoch 183/1500, Loss: 0.022360, Time: 82.528s
Test result. Precision: 5.307%@20, 2.284%@100, Recall: 17.268%@20, 36.135%@100, NDCG: 14.753%@20, 20.316%@100, Time: 4.077s
Save model to checkpoints\LightGCN_BPRTrainer_LGCNDataset_14.753.pth
Epoch 184/1500, Loss: 0.021936, Time: 82.559s
Test result. Precision: 5.315%@20, 2.286%@100, Recall: 17.289%@20, 36.143%@100, NDCG: 14.769%@20, 20.328%@100, Time: 3.983s
Save model to checkpoints\LightGCN_BPRTrainer_LGCNDataset_14.769.pth
Epoch 185/1500, Loss: 0.022243, Time: 82.621s
Test result. Precision: 5.319%@20, 2.288%@100, Recall: 17.304%@20, 36.179%@100, NDCG: 14.777%@20, 20.340%@100, Time: 4.030s
Save model to checkpoints\LightGCN_BPRTrainer_LGCNDataset_14.777.pth
Epoch 186/1500, Loss: 0.022157, Time: 82.512s
Test result. Precision: 5.327%@20, 2.289%@100, Recall: 17.320%@20, 36.210%@100, NDCG: 14.789%@20, 20.354%@100, Time: 4.030s
Save model to checkpoints\LightGCN_BPRTrainer_LGCNDataset_14.789.pth
Epoch 187/1500, Loss: 0.022114, Time: 82.574s
Test result. Precision: 5.327%@20, 2.288%@100, Recall: 17.317%@20, 36.194%@100, NDCG: 14.792%@20, 20.354%@100, Time: 4.077s
Save model to checkpoints\LightGCN_BPRTrainer_LGCNDataset_14.792.pth
Epoch 188/1500, Loss: 0.021808, Time: 82.496s
Test result. Precision: 5.327%@20, 2.287%@100, Recall: 17.331%@20, 36.180%@100, NDCG: 14.794%@20, 20.349%@100, Time: 4.015s
Save model to checkpoints\LightGCN_BPRTrainer_LGCNDataset_14.794.pth
Epoch 189/1500, Loss: 0.021523, Time: 82.986s
Test result. Precision: 5.326%@20, 2.290%@100, Recall: 17.314%@20, 36.221%@100, NDCG: 14.780%@20, 20.350%@100, Time: 3.968s
Save model to checkpoints\LightGCN_BPRTrainer_LGCNDataset_14.780.pth
Epoch 190/1500, Loss: 0.022152, Time: 82.528s
Test result. Precision: 5.325%@20, 2.292%@100, Recall: 17.313%@20, 36.260%@100, NDCG: 14.780%@20, 20.361%@100, Time: 4.108s
Save model to checkpoints\LightGCN_BPRTrainer_LGCNDataset_14.780.pth
Epoch 191/1500, Loss: 0.021952, Time: 82.528s
Test result. Precision: 5.325%@20, 2.293%@100, Recall: 17.315%@20, 36.301%@100, NDCG: 14.786%@20, 20.379%@100, Time: 4.265s
Save model to checkpoints\LightGCN_BPRTrainer_LGCNDataset_14.786.pth
Epoch 192/1500, Loss: 0.021877, Time: 82.621s
Test result. Precision: 5.331%@20, 2.291%@100, Recall: 17.331%@20, 36.277%@100, NDCG: 14.806%@20, 20.385%@100, Time: 4.046s
Save model to checkpoints\LightGCN_BPRTrainer_LGCNDataset_14.806.pth
Epoch 193/1500, Loss: 0.021555, Time: 82.559s
Test result. Precision: 5.334%@20, 2.292%@100, Recall: 17.328%@20, 36.285%@100, NDCG: 14.808%@20, 20.390%@100, Time: 4.124s
Save model to checkpoints\LightGCN_BPRTrainer_LGCNDataset_14.808.pth
Epoch 194/1500, Loss: 0.021682, Time: 82.887s
Test result. Precision: 5.332%@20, 2.293%@100, Recall: 17.339%@20, 36.316%@100, NDCG: 14.800%@20, 20.388%@100, Time: 3.952s
Save model to checkpoints\LightGCN_BPRTrainer_LGCNDataset_14.800.pth
Epoch 195/1500, Loss: 0.022061, Time: 82.512s
Test result. Precision: 5.327%@20, 2.295%@100, Recall: 17.310%@20, 36.347%@100, NDCG: 14.803%@20, 20.409%@100, Time: 4.093s
Save model to checkpoints\LightGCN_BPRTrainer_LGCNDataset_14.803.pth
Epoch 196/1500, Loss: 0.021990, Time: 83.131s
Test result. Precision: 5.328%@20, 2.295%@100, Recall: 17.307%@20, 36.340%@100, NDCG: 14.807%@20, 20.415%@100, Time: 4.030s
Save model to checkpoints\LightGCN_BPRTrainer_LGCNDataset_14.807.pth
Epoch 197/1500, Loss: 0.021890, Time: 83.512s
Test result. Precision: 5.323%@20, 2.297%@100, Recall: 17.302%@20, 36.378%@100, NDCG: 14.805%@20, 20.426%@100, Time: 4.030s
Save model to checkpoints\LightGCN_BPRTrainer_LGCNDataset_14.805.pth
Epoch 198/1500, Loss: 0.021477, Time: 82.699s
Test result. Precision: 5.329%@20, 2.294%@100, Recall: 17.341%@20, 36.334%@100, NDCG: 14.819%@20, 20.418%@100, Time: 4.108s
Save model to checkpoints\LightGCN_BPRTrainer_LGCNDataset_14.819.pth
Epoch 199/1500, Loss: 0.022048, Time: 82.512s
Test result. Precision: 5.339%@20, 2.297%@100, Recall: 17.361%@20, 36.380%@100, NDCG: 14.832%@20, 20.434%@100, Time: 4.093s
Save model to checkpoints\LightGCN_BPRTrainer_LGCNDataset_14.832.pth
Epoch 200/1500, Loss: 0.021401, Time: 82.762s
Test result. Precision: 5.339%@20, 2.299%@100, Recall: 17.370%@20, 36.413%@100, NDCG: 14.839%@20, 20.447%@100, Time: 4.140s
Save model to checkpoints\LightGCN_BPRTrainer_LGCNDataset_14.839.pth
Epoch 201/1500, Loss: 0.021747, Time: 82.512s
Test result. Precision: 5.346%@20, 2.301%@100, Recall: 17.392%@20, 36.445%@100, NDCG: 14.850%@20, 20.461%@100, Time: 4.233s
Save model to checkpoints\LightGCN_BPRTrainer_LGCNDataset_14.850.pth
Epoch 202/1500, Loss: 0.021604, Time: 82.871s
Test result. Precision: 5.349%@20, 2.302%@100, Recall: 17.400%@20, 36.433%@100, NDCG: 14.852%@20, 20.459%@100, Time: 4.077s
Save model to checkpoints\LightGCN_BPRTrainer_LGCNDataset_14.852.pth
Epoch 203/1500, Loss: 0.021540, Time: 82.637s
Test result. Precision: 5.354%@20, 2.304%@100, Recall: 17.417%@20, 36.465%@100, NDCG: 14.863%@20, 20.473%@100, Time: 4.155s
Save model to checkpoints\LightGCN_BPRTrainer_LGCNDataset_14.863.pth
Epoch 204/1500, Loss: 0.021345, Time: 82.762s
Test result. Precision: 5.357%@20, 2.303%@100, Recall: 17.412%@20, 36.463%@100, NDCG: 14.874%@20, 20.486%@100, Time: 4.311s
Save model to checkpoints\LightGCN_BPRTrainer_LGCNDataset_14.874.pth
Epoch 205/1500, Loss: 0.021467, Time: 82.559s
Test result. Precision: 5.364%@20, 2.303%@100, Recall: 17.449%@20, 36.452%@100, NDCG: 14.886%@20, 20.482%@100, Time: 3.968s
Save model to checkpoints\LightGCN_BPRTrainer_LGCNDataset_14.886.pth
Epoch 206/1500, Loss: 0.021288, Time: 82.406s
Test result. Precision: 5.359%@20, 2.304%@100, Recall: 17.414%@20, 36.462%@100, NDCG: 14.873%@20, 20.485%@100, Time: 4.030s
Save model to checkpoints\LightGCN_BPRTrainer_LGCNDataset_14.873.pth
Epoch 207/1500, Loss: 0.021043, Time: 82.684s
Test result. Precision: 5.361%@20, 2.306%@100, Recall: 17.416%@20, 36.471%@100, NDCG: 14.888%@20, 20.504%@100, Time: 4.015s
Save model to checkpoints\LightGCN_BPRTrainer_LGCNDataset_14.888.pth
Epoch 208/1500, Loss: 0.021065, Time: 82.918s
Test result. Precision: 5.368%@20, 2.306%@100, Recall: 17.458%@20, 36.479%@100, NDCG: 14.898%@20, 20.503%@100, Time: 4.077s
Save model to checkpoints\LightGCN_BPRTrainer_LGCNDataset_14.898.pth
Epoch 209/1500, Loss: 0.021335, Time: 82.543s
Test result. Precision: 5.368%@20, 2.308%@100, Recall: 17.464%@20, 36.517%@100, NDCG: 14.902%@20, 20.516%@100, Time: 4.140s
Save model to checkpoints\LightGCN_BPRTrainer_LGCNDataset_14.902.pth
Epoch 210/1500, Loss: 0.021102, Time: 82.626s
Test result. Precision: 5.370%@20, 2.308%@100, Recall: 17.462%@20, 36.535%@100, NDCG: 14.909%@20, 20.527%@100, Time: 4.093s
Save model to checkpoints\LightGCN_BPRTrainer_LGCNDataset_14.909.pth
Epoch 211/1500, Loss: 0.021132, Time: 82.496s
Test result. Precision: 5.366%@20, 2.309%@100, Recall: 17.447%@20, 36.544%@100, NDCG: 14.898%@20, 20.527%@100, Time: 4.233s
Save model to checkpoints\LightGCN_BPRTrainer_LGCNDataset_14.898.pth
Epoch 212/1500, Loss: 0.020915, Time: 82.871s
Test result. Precision: 5.366%@20, 2.312%@100, Recall: 17.455%@20, 36.571%@100, NDCG: 14.904%@20, 20.540%@100, Time: 4.155s
Save model to checkpoints\LightGCN_BPRTrainer_LGCNDataset_14.904.pth
Epoch 213/1500, Loss: 0.020973, Time: 82.481s
Test result. Precision: 5.369%@20, 2.311%@100, Recall: 17.466%@20, 36.576%@100, NDCG: 14.910%@20, 20.544%@100, Time: 4.015s
Save model to checkpoints\LightGCN_BPRTrainer_LGCNDataset_14.910.pth
Epoch 214/1500, Loss: 0.021275, Time: 83.012s
Test result. Precision: 5.379%@20, 2.313%@100, Recall: 17.481%@20, 36.608%@100, NDCG: 14.928%@20, 20.561%@100, Time: 4.015s
Save model to checkpoints\LightGCN_BPRTrainer_LGCNDataset_14.928.pth
Epoch 215/1500, Loss: 0.020965, Time: 82.996s
Test result. Precision: 5.378%@20, 2.313%@100, Recall: 17.475%@20, 36.611%@100, NDCG: 14.926%@20, 20.562%@100, Time: 4.108s
Save model to checkpoints\LightGCN_BPRTrainer_LGCNDataset_14.926.pth
Epoch 216/1500, Loss: 0.021113, Time: 82.559s
Test result. Precision: 5.385%@20, 2.314%@100, Recall: 17.518%@20, 36.635%@100, NDCG: 14.952%@20, 20.581%@100, Time: 4.046s
Save model to checkpoints\LightGCN_BPRTrainer_LGCNDataset_14.952.pth
Epoch 217/1500, Loss: 0.020865, Time: 83.074s
Test result. Precision: 5.389%@20, 2.314%@100, Recall: 17.530%@20, 36.613%@100, NDCG: 14.953%@20, 20.575%@100, Time: 3.999s
Save model to checkpoints\LightGCN_BPRTrainer_LGCNDataset_14.953.pth
Epoch 218/1500, Loss: 0.020813, Time: 82.637s
Test result. Precision: 5.386%@20, 2.315%@100, Recall: 17.515%@20, 36.643%@100, NDCG: 14.949%@20, 20.583%@100, Time: 4.186s
Save model to checkpoints\LightGCN_BPRTrainer_LGCNDataset_14.949.pth
Epoch 219/1500, Loss: 0.020871, Time: 82.574s
Test result. Precision: 5.387%@20, 2.316%@100, Recall: 17.523%@20, 36.678%@100, NDCG: 14.955%@20, 20.596%@100, Time: 3.999s
Save model to checkpoints\LightGCN_BPRTrainer_LGCNDataset_14.955.pth
Epoch 220/1500, Loss: 0.020465, Time: 82.490s
Test result. Precision: 5.388%@20, 2.316%@100, Recall: 17.524%@20, 36.675%@100, NDCG: 14.968%@20, 20.608%@100, Time: 4.062s
Save model to checkpoints\LightGCN_BPRTrainer_LGCNDataset_14.968.pth
Epoch 221/1500, Loss: 0.020493, Time: 82.949s
Test result. Precision: 5.390%@20, 2.317%@100, Recall: 17.534%@20, 36.676%@100, NDCG: 14.976%@20, 20.616%@100, Time: 4.062s
Save model to checkpoints\LightGCN_BPRTrainer_LGCNDataset_14.976.pth
Epoch 222/1500, Loss: 0.020237, Time: 82.590s
Test result. Precision: 5.386%@20, 2.316%@100, Recall: 17.527%@20, 36.686%@100, NDCG: 14.969%@20, 20.614%@100, Time: 4.030s
Save model to checkpoints\LightGCN_BPRTrainer_LGCNDataset_14.969.pth
Epoch 223/1500, Loss: 0.020699, Time: 82.403s
Test result. Precision: 5.393%@20, 2.317%@100, Recall: 17.545%@20, 36.678%@100, NDCG: 14.981%@20, 20.619%@100, Time: 4.187s
Save model to checkpoints\LightGCN_BPRTrainer_LGCNDataset_14.981.pth
Epoch 224/1500, Loss: 0.020689, Time: 82.496s
Test result. Precision: 5.392%@20, 2.318%@100, Recall: 17.551%@20, 36.680%@100, NDCG: 14.985%@20, 20.625%@100, Time: 4.046s
Save model to checkpoints\LightGCN_BPRTrainer_LGCNDataset_14.985.pth
Epoch 225/1500, Loss: 0.020442, Time: 82.996s
Test result. Precision: 5.387%@20, 2.317%@100, Recall: 17.531%@20, 36.680%@100, NDCG: 14.984%@20, 20.630%@100, Time: 4.077s
Save model to checkpoints\LightGCN_BPRTrainer_LGCNDataset_14.984.pth
Epoch 226/1500, Loss: 0.020683, Time: 82.652s
Test result. Precision: 5.395%@20, 2.317%@100, Recall: 17.563%@20, 36.677%@100, NDCG: 14.984%@20, 20.620%@100, Time: 4.155s
Save model to checkpoints\LightGCN_BPRTrainer_LGCNDataset_14.984.pth
Epoch 227/1500, Loss: 0.020558, Time: 82.449s
Test result. Precision: 5.401%@20, 2.319%@100, Recall: 17.580%@20, 36.726%@100, NDCG: 15.002%@20, 20.645%@100, Time: 4.046s
Save model to checkpoints\LightGCN_BPRTrainer_LGCNDataset_15.002.pth
Epoch 228/1500, Loss: 0.020461, Time: 82.559s
Test result. Precision: 5.403%@20, 2.317%@100, Recall: 17.587%@20, 36.697%@100, NDCG: 15.009%@20, 20.640%@100, Time: 3.983s
Save model to checkpoints\LightGCN_BPRTrainer_LGCNDataset_15.009.pth
Epoch 229/1500, Loss: 0.020691, Time: 82.559s
Test result. Precision: 5.407%@20, 2.322%@100, Recall: 17.595%@20, 36.756%@100, NDCG: 15.009%@20, 20.656%@100, Time: 4.108s
Save model to checkpoints\LightGCN_BPRTrainer_LGCNDataset_15.009.pth
Epoch 230/1500, Loss: 0.020396, Time: 82.426s
Test result. Precision: 5.413%@20, 2.321%@100, Recall: 17.609%@20, 36.732%@100, NDCG: 15.028%@20, 20.663%@100, Time: 3.952s
Save model to checkpoints\LightGCN_BPRTrainer_LGCNDataset_15.028.pth
Epoch 231/1500, Loss: 0.020592, Time: 82.512s
Test result. Precision: 5.414%@20, 2.323%@100, Recall: 17.602%@20, 36.761%@100, NDCG: 15.038%@20, 20.684%@100, Time: 4.077s
Save model to checkpoints\LightGCN_BPRTrainer_LGCNDataset_15.038.pth
Epoch 232/1500, Loss: 0.020545, Time: 82.512s
Test result. Precision: 5.415%@20, 2.324%@100, Recall: 17.616%@20, 36.783%@100, NDCG: 15.039%@20, 20.687%@100, Time: 4.202s
Save model to checkpoints\LightGCN_BPRTrainer_LGCNDataset_15.039.pth
Epoch 233/1500, Loss: 0.020549, Time: 82.965s
Test result. Precision: 5.416%@20, 2.326%@100, Recall: 17.623%@20, 36.809%@100, NDCG: 15.044%@20, 20.698%@100, Time: 3.999s
Save model to checkpoints\LightGCN_BPRTrainer_LGCNDataset_15.044.pth
Epoch 234/1500, Loss: 0.020112, Time: 82.465s
Test result. Precision: 5.420%@20, 2.326%@100, Recall: 17.628%@20, 36.818%@100, NDCG: 15.041%@20, 20.696%@100, Time: 4.108s
Save model to checkpoints\LightGCN_BPRTrainer_LGCNDataset_15.041.pth
Epoch 235/1500, Loss: 0.020394, Time: 82.849s
Test result. Precision: 5.428%@20, 2.327%@100, Recall: 17.651%@20, 36.827%@100, NDCG: 15.060%@20, 20.708%@100, Time: 3.968s
Save model to checkpoints\LightGCN_BPRTrainer_LGCNDataset_15.060.pth
Epoch 236/1500, Loss: 0.020187, Time: 82.902s
Test result. Precision: 5.424%@20, 2.326%@100, Recall: 17.656%@20, 36.810%@100, NDCG: 15.052%@20, 20.697%@100, Time: 4.030s
Save model to checkpoints\LightGCN_BPRTrainer_LGCNDataset_15.052.pth
Epoch 237/1500, Loss: 0.020309, Time: 82.793s
Test result. Precision: 5.427%@20, 2.327%@100, Recall: 17.668%@20, 36.839%@100, NDCG: 15.062%@20, 20.711%@100, Time: 4.030s
Save model to checkpoints\LightGCN_BPRTrainer_LGCNDataset_15.062.pth
Epoch 238/1500, Loss: 0.020259, Time: 82.517s
Test result. Precision: 5.429%@20, 2.326%@100, Recall: 17.686%@20, 36.806%@100, NDCG: 15.071%@20, 20.710%@100, Time: 4.062s
Save model to checkpoints\LightGCN_BPRTrainer_LGCNDataset_15.071.pth
Epoch 239/1500, Loss: 0.020237, Time: 82.809s
Test result. Precision: 5.431%@20, 2.327%@100, Recall: 17.704%@20, 36.821%@100, NDCG: 15.081%@20, 20.719%@100, Time: 4.093s
Save model to checkpoints\LightGCN_BPRTrainer_LGCNDataset_15.081.pth
Epoch 240/1500, Loss: 0.020337, Time: 82.965s
Test result. Precision: 5.436%@20, 2.329%@100, Recall: 17.711%@20, 36.842%@100, NDCG: 15.084%@20, 20.724%@100, Time: 4.265s
Save model to checkpoints\LightGCN_BPRTrainer_LGCNDataset_15.084.pth
Epoch 241/1500, Loss: 0.020467, Time: 82.834s
Test result. Precision: 5.431%@20, 2.329%@100, Recall: 17.701%@20, 36.844%@100, NDCG: 15.084%@20, 20.730%@100, Time: 4.046s
Save model to checkpoints\LightGCN_BPRTrainer_LGCNDataset_15.084.pth
Epoch 242/1500, Loss: 0.020491, Time: 82.528s
Test result. Precision: 5.436%@20, 2.328%@100, Recall: 17.695%@20, 36.855%@100, NDCG: 15.085%@20, 20.730%@100, Time: 4.015s
Save model to checkpoints\LightGCN_BPRTrainer_LGCNDataset_15.085.pth
Epoch 243/1500, Loss: 0.019626, Time: 82.481s
Test result. Precision: 5.432%@20, 2.328%@100, Recall: 17.691%@20, 36.838%@100, NDCG: 15.080%@20, 20.726%@100, Time: 3.983s
Save model to checkpoints\LightGCN_BPRTrainer_LGCNDataset_15.080.pth
Epoch 244/1500, Loss: 0.019972, Time: 83.027s
Test result. Precision: 5.438%@20, 2.329%@100, Recall: 17.717%@20, 36.862%@100, NDCG: 15.089%@20, 20.733%@100, Time: 4.062s
Save model to checkpoints\LightGCN_BPRTrainer_LGCNDataset_15.089.pth
Epoch 245/1500, Loss: 0.020180, Time: 82.684s
Test result. Precision: 5.434%@20, 2.330%@100, Recall: 17.700%@20, 36.846%@100, NDCG: 15.089%@20, 20.737%@100, Time: 4.015s
Save model to checkpoints\LightGCN_BPRTrainer_LGCNDataset_15.089.pth
Epoch 246/1500, Loss: 0.020162, Time: 82.559s
Test result. Precision: 5.446%@20, 2.329%@100, Recall: 17.751%@20, 36.867%@100, NDCG: 15.098%@20, 20.731%@100, Time: 4.030s
Save model to checkpoints\LightGCN_BPRTrainer_LGCNDataset_15.098.pth
Epoch 247/1500, Loss: 0.019830, Time: 82.481s
Test result. Precision: 5.444%@20, 2.331%@100, Recall: 17.731%@20, 36.878%@100, NDCG: 15.099%@20, 20.744%@100, Time: 4.108s
Save model to checkpoints\LightGCN_BPRTrainer_LGCNDataset_15.099.pth
Epoch 248/1500, Loss: 0.020201, Time: 82.465s
Test result. Precision: 5.449%@20, 2.330%@100, Recall: 17.741%@20, 36.881%@100, NDCG: 15.104%@20, 20.743%@100, Time: 3.983s
Save model to checkpoints\LightGCN_BPRTrainer_LGCNDataset_15.104.pth
Epoch 249/1500, Loss: 0.019619, Time: 82.746s
Test result. Precision: 5.446%@20, 2.331%@100, Recall: 17.733%@20, 36.906%@100, NDCG: 15.104%@20, 20.751%@100, Time: 3.983s
Save model to checkpoints\LightGCN_BPRTrainer_LGCNDataset_15.104.pth
Epoch 250/1500, Loss: 0.019890, Time: 82.934s
Test result. Precision: 5.445%@20, 2.332%@100, Recall: 17.727%@20, 36.915%@100, NDCG: 15.101%@20, 20.755%@100, Time: 3.999s
Save model to checkpoints\LightGCN_BPRTrainer_LGCNDataset_15.101.pth
Epoch 251/1500, Loss: 0.020012, Time: 82.426s
Test result. Precision: 5.456%@20, 2.333%@100, Recall: 17.750%@20, 36.945%@100, NDCG: 15.124%@20, 20.775%@100, Time: 4.015s
Save model to checkpoints\LightGCN_BPRTrainer_LGCNDataset_15.124.pth
Epoch 252/1500, Loss: 0.019684, Time: 82.543s
Test result. Precision: 5.457%@20, 2.333%@100, Recall: 17.754%@20, 36.949%@100, NDCG: 15.122%@20, 20.774%@100, Time: 4.015s
Save model to checkpoints\LightGCN_BPRTrainer_LGCNDataset_15.122.pth
Epoch 253/1500, Loss: 0.019884, Time: 82.496s
Test result. Precision: 5.454%@20, 2.332%@100, Recall: 17.752%@20, 36.940%@100, NDCG: 15.126%@20, 20.778%@100, Time: 3.968s
Save model to checkpoints\LightGCN_BPRTrainer_LGCNDataset_15.126.pth
Epoch 254/1500, Loss: 0.019755, Time: 82.918s
Test result. Precision: 5.450%@20, 2.334%@100, Recall: 17.741%@20, 36.977%@100, NDCG: 15.116%@20, 20.782%@100, Time: 4.077s
Save model to checkpoints\LightGCN_BPRTrainer_LGCNDataset_15.116.pth
Epoch 255/1500, Loss: 0.019792, Time: 82.371s
Test result. Precision: 5.450%@20, 2.333%@100, Recall: 17.737%@20, 36.958%@100, NDCG: 15.118%@20, 20.781%@100, Time: 3.937s
Save model to checkpoints\LightGCN_BPRTrainer_LGCNDataset_15.118.pth
Epoch 256/1500, Loss: 0.019692, Time: 82.762s
Test result. Precision: 5.454%@20, 2.334%@100, Recall: 17.747%@20, 36.966%@100, NDCG: 15.119%@20, 20.781%@100, Time: 4.108s
Save model to checkpoints\LightGCN_BPRTrainer_LGCNDataset_15.119.pth
Epoch 257/1500, Loss: 0.019890, Time: 82.465s
Test result. Precision: 5.454%@20, 2.335%@100, Recall: 17.765%@20, 36.962%@100, NDCG: 15.125%@20, 20.783%@100, Time: 3.968s
Save model to checkpoints\LightGCN_BPRTrainer_LGCNDataset_15.125.pth
Epoch 258/1500, Loss: 0.019754, Time: 82.590s
Test result. Precision: 5.457%@20, 2.337%@100, Recall: 17.769%@20, 36.981%@100, NDCG: 15.130%@20, 20.793%@100, Time: 4.140s
Save model to checkpoints\LightGCN_BPRTrainer_LGCNDataset_15.130.pth
Epoch 259/1500, Loss: 0.019862, Time: 82.705s
Test result. Precision: 5.456%@20, 2.337%@100, Recall: 17.773%@20, 36.991%@100, NDCG: 15.126%@20, 20.792%@100, Time: 4.062s
Save model to checkpoints\LightGCN_BPRTrainer_LGCNDataset_15.126.pth
Epoch 260/1500, Loss: 0.019424, Time: 82.574s
Test result. Precision: 5.446%@20, 2.336%@100, Recall: 17.764%@20, 36.993%@100, NDCG: 15.119%@20, 20.790%@100, Time: 4.015s
Save model to checkpoints\LightGCN_BPRTrainer_LGCNDataset_15.119.pth
Epoch 261/1500, Loss: 0.019550, Time: 82.746s
Test result. Precision: 5.452%@20, 2.336%@100, Recall: 17.781%@20, 36.977%@100, NDCG: 15.120%@20, 20.781%@100, Time: 4.077s
Save model to checkpoints\LightGCN_BPRTrainer_LGCNDataset_15.120.pth
Epoch 262/1500, Loss: 0.019576, Time: 82.563s
Test result. Precision: 5.461%@20, 2.337%@100, Recall: 17.806%@20, 37.002%@100, NDCG: 15.132%@20, 20.790%@100, Time: 4.140s
Save model to checkpoints\LightGCN_BPRTrainer_LGCNDataset_15.132.pth
Epoch 263/1500, Loss: 0.019590, Time: 82.387s
Test result. Precision: 5.461%@20, 2.337%@100, Recall: 17.802%@20, 37.000%@100, NDCG: 15.139%@20, 20.797%@100, Time: 4.093s
Save model to checkpoints\LightGCN_BPRTrainer_LGCNDataset_15.139.pth
Epoch 264/1500, Loss: 0.019907, Time: 82.559s
Test result. Precision: 5.465%@20, 2.337%@100, Recall: 17.810%@20, 37.004%@100, NDCG: 15.145%@20, 20.802%@100, Time: 4.062s
Save model to checkpoints\LightGCN_BPRTrainer_LGCNDataset_15.145.pth
Epoch 265/1500, Loss: 0.019680, Time: 82.621s
Test result. Precision: 5.471%@20, 2.338%@100, Recall: 17.829%@20, 37.025%@100, NDCG: 15.159%@20, 20.814%@100, Time: 4.030s
Save model to checkpoints\LightGCN_BPRTrainer_LGCNDataset_15.159.pth
Epoch 266/1500, Loss: 0.019529, Time: 82.403s
Test result. Precision: 5.474%@20, 2.338%@100, Recall: 17.841%@20, 37.016%@100, NDCG: 15.163%@20, 20.813%@100, Time: 4.108s
Save model to checkpoints\LightGCN_BPRTrainer_LGCNDataset_15.163.pth
Epoch 267/1500, Loss: 0.019617, Time: 82.481s
Test result. Precision: 5.465%@20, 2.339%@100, Recall: 17.797%@20, 37.035%@100, NDCG: 15.151%@20, 20.821%@100, Time: 4.140s
Save model to checkpoints\LightGCN_BPRTrainer_LGCNDataset_15.151.pth
Epoch 268/1500, Loss: 0.019492, Time: 82.746s
Test result. Precision: 5.464%@20, 2.339%@100, Recall: 17.793%@20, 37.028%@100, NDCG: 15.151%@20, 20.823%@100, Time: 4.015s
Save model to checkpoints\LightGCN_BPRTrainer_LGCNDataset_15.151.pth
Epoch 269/1500, Loss: 0.019402, Time: 82.559s
Test result. Precision: 5.465%@20, 2.340%@100, Recall: 17.804%@20, 37.039%@100, NDCG: 15.160%@20, 20.831%@100, Time: 4.062s
Save model to checkpoints\LightGCN_BPRTrainer_LGCNDataset_15.160.pth
Epoch 270/1500, Loss: 0.019539, Time: 82.590s
Test result. Precision: 5.468%@20, 2.341%@100, Recall: 17.806%@20, 37.062%@100, NDCG: 15.170%@20, 20.845%@100, Time: 4.108s
Save model to checkpoints\LightGCN_BPRTrainer_LGCNDataset_15.170.pth
Epoch 271/1500, Loss: 0.019325, Time: 82.512s
Test result. Precision: 5.468%@20, 2.342%@100, Recall: 17.803%@20, 37.064%@100, NDCG: 15.159%@20, 20.838%@100, Time: 4.046s
Save model to checkpoints\LightGCN_BPRTrainer_LGCNDataset_15.159.pth
Epoch 272/1500, Loss: 0.019237, Time: 82.786s
Test result. Precision: 5.468%@20, 2.343%@100, Recall: 17.815%@20, 37.098%@100, NDCG: 15.162%@20, 20.845%@100, Time: 3.952s
Save model to checkpoints\LightGCN_BPRTrainer_LGCNDataset_15.162.pth
Epoch 273/1500, Loss: 0.019520, Time: 82.403s
Test result. Precision: 5.469%@20, 2.345%@100, Recall: 17.824%@20, 37.111%@100, NDCG: 15.160%@20, 20.846%@100, Time: 4.108s
Save model to checkpoints\LightGCN_BPRTrainer_LGCNDataset_15.160.pth
Epoch 274/1500, Loss: 0.019398, Time: 82.496s
Test result. Precision: 5.475%@20, 2.345%@100, Recall: 17.832%@20, 37.102%@100, NDCG: 15.172%@20, 20.852%@100, Time: 3.999s
Save model to checkpoints\LightGCN_BPRTrainer_LGCNDataset_15.172.pth
Epoch 275/1500, Loss: 0.019102, Time: 82.840s
Test result. Precision: 5.468%@20, 2.345%@100, Recall: 17.810%@20, 37.115%@100, NDCG: 15.161%@20, 20.854%@100, Time: 4.030s
Save model to checkpoints\LightGCN_BPRTrainer_LGCNDataset_15.161.pth
Epoch 276/1500, Loss: 0.019458, Time: 82.934s
Test result. Precision: 5.474%@20, 2.344%@100, Recall: 17.845%@20, 37.084%@100, NDCG: 15.167%@20, 20.841%@100, Time: 4.155s
Save model to checkpoints\LightGCN_BPRTrainer_LGCNDataset_15.167.pth
Epoch 277/1500, Loss: 0.019394, Time: 82.496s
Test result. Precision: 5.474%@20, 2.343%@100, Recall: 17.828%@20, 37.103%@100, NDCG: 15.164%@20, 20.844%@100, Time: 4.124s
Save model to checkpoints\LightGCN_BPRTrainer_LGCNDataset_15.164.pth
Epoch 278/1500, Loss: 0.019513, Time: 82.824s
Test result. Precision: 5.474%@20, 2.343%@100, Recall: 17.845%@20, 37.125%@100, NDCG: 15.163%@20, 20.843%@100, Time: 4.015s
Save model to checkpoints\LightGCN_BPRTrainer_LGCNDataset_15.163.pth
Epoch 279/1500, Loss: 0.019184, Time: 82.914s
Test result. Precision: 5.479%@20, 2.344%@100, Recall: 17.854%@20, 37.121%@100, NDCG: 15.175%@20, 20.853%@100, Time: 3.968s
Save model to checkpoints\LightGCN_BPRTrainer_LGCNDataset_15.175.pth
Epoch 280/1500, Loss: 0.019123, Time: 82.531s
Test result. Precision: 5.477%@20, 2.346%@100, Recall: 17.856%@20, 37.147%@100, NDCG: 15.182%@20, 20.867%@100, Time: 4.124s
Save model to checkpoints\LightGCN_BPRTrainer_LGCNDataset_15.182.pth
Epoch 281/1500, Loss: 0.019129, Time: 82.512s
Test result. Precision: 5.475%@20, 2.345%@100, Recall: 17.844%@20, 37.137%@100, NDCG: 15.168%@20, 20.855%@100, Time: 3.983s
Save model to checkpoints\LightGCN_BPRTrainer_LGCNDataset_15.168.pth
Epoch 282/1500, Loss: 0.019064, Time: 82.552s
Test result. Precision: 5.481%@20, 2.344%@100, Recall: 17.873%@20, 37.121%@100, NDCG: 15.188%@20, 20.861%@100, Time: 4.108s
Save model to checkpoints\LightGCN_BPRTrainer_LGCNDataset_15.188.pth
Epoch 283/1500, Loss: 0.019045, Time: 82.356s
Test result. Precision: 5.482%@20, 2.343%@100, Recall: 17.871%@20, 37.085%@100, NDCG: 15.187%@20, 20.851%@100, Time: 3.983s
Save model to checkpoints\LightGCN_BPRTrainer_LGCNDataset_15.187.pth
Epoch 284/1500, Loss: 0.019358, Time: 82.824s
Test result. Precision: 5.482%@20, 2.344%@100, Recall: 17.864%@20, 37.106%@100, NDCG: 15.181%@20, 20.852%@100, Time: 4.077s
Save model to checkpoints\LightGCN_BPRTrainer_LGCNDataset_15.181.pth
Epoch 285/1500, Loss: 0.019227, Time: 82.356s
Test result. Precision: 5.487%@20, 2.346%@100, Recall: 17.867%@20, 37.136%@100, NDCG: 15.186%@20, 20.863%@100, Time: 4.015s
Save model to checkpoints\LightGCN_BPRTrainer_LGCNDataset_15.186.pth
Epoch 286/1500, Loss: 0.018950, Time: 82.465s
Test result. Precision: 5.484%@20, 2.346%@100, Recall: 17.860%@20, 37.143%@100, NDCG: 15.180%@20, 20.862%@100, Time: 4.155s
Save model to checkpoints\LightGCN_BPRTrainer_LGCNDataset_15.180.pth
Epoch 287/1500, Loss: 0.019071, Time: 82.637s
Test result. Precision: 5.484%@20, 2.348%@100, Recall: 17.886%@20, 37.166%@100, NDCG: 15.193%@20, 20.877%@100, Time: 4.030s
Save model to checkpoints\LightGCN_BPRTrainer_LGCNDataset_15.193.pth
Epoch 288/1500, Loss: 0.018915, Time: 83.012s
Test result. Precision: 5.483%@20, 2.347%@100, Recall: 17.885%@20, 37.168%@100, NDCG: 15.187%@20, 20.871%@100, Time: 4.062s
Save model to checkpoints\LightGCN_BPRTrainer_LGCNDataset_15.187.pth
Epoch 289/1500, Loss: 0.018701, Time: 82.481s
Test result. Precision: 5.488%@20, 2.349%@100, Recall: 17.902%@20, 37.195%@100, NDCG: 15.210%@20, 20.895%@100, Time: 3.999s
Save model to checkpoints\LightGCN_BPRTrainer_LGCNDataset_15.210.pth
Epoch 290/1500, Loss: 0.018964, Time: 82.809s
Test result. Precision: 5.486%@20, 2.350%@100, Recall: 17.885%@20, 37.206%@100, NDCG: 15.201%@20, 20.894%@100, Time: 4.077s
Save model to checkpoints\LightGCN_BPRTrainer_LGCNDataset_15.201.pth
Epoch 291/1500, Loss: 0.019026, Time: 83.230s
Test result. Precision: 5.479%@20, 2.351%@100, Recall: 17.855%@20, 37.232%@100, NDCG: 15.192%@20, 20.902%@100, Time: 4.030s
Save model to checkpoints\LightGCN_BPRTrainer_LGCNDataset_15.192.pth
Epoch 292/1500, Loss: 0.019146, Time: 82.512s
Test result. Precision: 5.484%@20, 2.350%@100, Recall: 17.872%@20, 37.185%@100, NDCG: 15.206%@20, 20.900%@100, Time: 4.030s
Save model to checkpoints\LightGCN_BPRTrainer_LGCNDataset_15.206.pth
Epoch 293/1500, Loss: 0.018932, Time: 82.598s
Test result. Precision: 5.481%@20, 2.350%@100, Recall: 17.871%@20, 37.203%@100, NDCG: 15.199%@20, 20.897%@100, Time: 4.140s
Save model to checkpoints\LightGCN_BPRTrainer_LGCNDataset_15.199.pth
Epoch 294/1500, Loss: 0.018976, Time: 83.121s
Test result. Precision: 5.485%@20, 2.351%@100, Recall: 17.888%@20, 37.215%@100, NDCG: 15.206%@20, 20.901%@100, Time: 4.077s
Save model to checkpoints\LightGCN_BPRTrainer_LGCNDataset_15.206.pth
Epoch 295/1500, Loss: 0.019090, Time: 82.918s
Test result. Precision: 5.491%@20, 2.352%@100, Recall: 17.910%@20, 37.252%@100, NDCG: 15.215%@20, 20.911%@100, Time: 3.999s
Save model to checkpoints\LightGCN_BPRTrainer_LGCNDataset_15.215.pth
Epoch 296/1500, Loss: 0.018880, Time: 83.106s
Test result. Precision: 5.490%@20, 2.352%@100, Recall: 17.923%@20, 37.239%@100, NDCG: 15.221%@20, 20.913%@100, Time: 4.046s
Save model to checkpoints\LightGCN_BPRTrainer_LGCNDataset_15.221.pth
Epoch 297/1500, Loss: 0.018754, Time: 82.371s
Test result. Precision: 5.492%@20, 2.354%@100, Recall: 17.900%@20, 37.261%@100, NDCG: 15.215%@20, 20.919%@100, Time: 3.968s
Save model to checkpoints\LightGCN_BPRTrainer_LGCNDataset_15.215.pth
Epoch 298/1500, Loss: 0.019191, Time: 83.309s
Test result. Precision: 5.500%@20, 2.355%@100, Recall: 17.936%@20, 37.266%@100, NDCG: 15.235%@20, 20.930%@100, Time: 3.983s
Save model to checkpoints\LightGCN_BPRTrainer_LGCNDataset_15.235.pth
Epoch 299/1500, Loss: 0.018906, Time: 83.246s
Test result. Precision: 5.496%@20, 2.355%@100, Recall: 17.935%@20, 37.293%@100, NDCG: 15.240%@20, 20.944%@100, Time: 3.952s
Save model to checkpoints\LightGCN_BPRTrainer_LGCNDataset_15.240.pth
Epoch 300/1500, Loss: 0.018709, Time: 82.554s
Test result. Precision: 5.498%@20, 2.356%@100, Recall: 17.946%@20, 37.314%@100, NDCG: 15.240%@20, 20.946%@100, Time: 4.030s
Save model to checkpoints\LightGCN_BPRTrainer_LGCNDataset_15.240.pth
Epoch 301/1500, Loss: 0.018774, Time: 82.324s
Test result. Precision: 5.492%@20, 2.357%@100, Recall: 17.914%@20, 37.304%@100, NDCG: 15.237%@20, 20.953%@100, Time: 3.999s
Save model to checkpoints\LightGCN_BPRTrainer_LGCNDataset_15.237.pth
Epoch 302/1500, Loss: 0.018869, Time: 82.481s
Test result. Precision: 5.495%@20, 2.357%@100, Recall: 17.926%@20, 37.312%@100, NDCG: 15.241%@20, 20.955%@100, Time: 4.171s
Save model to checkpoints\LightGCN_BPRTrainer_LGCNDataset_15.241.pth
Epoch 303/1500, Loss: 0.019109, Time: 82.480s
Test result. Precision: 5.496%@20, 2.357%@100, Recall: 17.928%@20, 37.300%@100, NDCG: 15.241%@20, 20.952%@100, Time: 4.062s
Save model to checkpoints\LightGCN_BPRTrainer_LGCNDataset_15.241.pth
Epoch 304/1500, Loss: 0.018986, Time: 82.481s
Test result. Precision: 5.490%@20, 2.359%@100, Recall: 17.916%@20, 37.336%@100, NDCG: 15.231%@20, 20.960%@100, Time: 4.296s
Save model to checkpoints\LightGCN_BPRTrainer_LGCNDataset_15.231.pth
Epoch 305/1500, Loss: 0.018839, Time: 82.371s
Test result. Precision: 5.494%@20, 2.356%@100, Recall: 17.922%@20, 37.291%@100, NDCG: 15.231%@20, 20.944%@100, Time: 4.015s
Save model to checkpoints\LightGCN_BPRTrainer_LGCNDataset_15.231.pth
Epoch 306/1500, Loss: 0.018637, Time: 82.934s
Test result. Precision: 5.495%@20, 2.357%@100, Recall: 17.932%@20, 37.310%@100, NDCG: 15.245%@20, 20.963%@100, Time: 3.983s
Save model to checkpoints\LightGCN_BPRTrainer_LGCNDataset_15.245.pth
Epoch 307/1500, Loss: 0.018852, Time: 82.590s
Test result. Precision: 5.499%@20, 2.358%@100, Recall: 17.939%@20, 37.333%@100, NDCG: 15.251%@20, 20.971%@100, Time: 4.108s
Save model to checkpoints\LightGCN_BPRTrainer_LGCNDataset_15.251.pth
Epoch 308/1500, Loss: 0.018857, Time: 83.105s
Test result. Precision: 5.501%@20, 2.360%@100, Recall: 17.942%@20, 37.372%@100, NDCG: 15.245%@20, 20.974%@100, Time: 4.046s
Save model to checkpoints\LightGCN_BPRTrainer_LGCNDataset_15.245.pth
Epoch 309/1500, Loss: 0.018803, Time: 82.543s
Test result. Precision: 5.499%@20, 2.361%@100, Recall: 17.939%@20, 37.389%@100, NDCG: 15.242%@20, 20.977%@100, Time: 4.046s
Save model to checkpoints\LightGCN_BPRTrainer_LGCNDataset_15.242.pth
Epoch 310/1500, Loss: 0.018582, Time: 82.762s
Test result. Precision: 5.497%@20, 2.363%@100, Recall: 17.930%@20, 37.400%@100, NDCG: 15.244%@20, 20.987%@100, Time: 3.968s
Save model to checkpoints\LightGCN_BPRTrainer_LGCNDataset_15.244.pth
Epoch 311/1500, Loss: 0.018829, Time: 82.371s
Test result. Precision: 5.501%@20, 2.362%@100, Recall: 17.936%@20, 37.378%@100, NDCG: 15.255%@20, 20.989%@100, Time: 4.124s
Save model to checkpoints\LightGCN_BPRTrainer_LGCNDataset_15.255.pth
Epoch 312/1500, Loss: 0.018526, Time: 82.418s
Test result. Precision: 5.507%@20, 2.364%@100, Recall: 17.965%@20, 37.409%@100, NDCG: 15.264%@20, 20.997%@100, Time: 4.218s
Save model to checkpoints\LightGCN_BPRTrainer_LGCNDataset_15.264.pth
Epoch 313/1500, Loss: 0.018609, Time: 82.473s
Test result. Precision: 5.507%@20, 2.364%@100, Recall: 17.961%@20, 37.411%@100, NDCG: 15.273%@20, 21.008%@100, Time: 4.187s
Save model to checkpoints\LightGCN_BPRTrainer_LGCNDataset_15.273.pth
Epoch 314/1500, Loss: 0.018725, Time: 82.434s
Test result. Precision: 5.512%@20, 2.363%@100, Recall: 17.972%@20, 37.394%@100, NDCG: 15.269%@20, 20.997%@100, Time: 4.093s
Save model to checkpoints\LightGCN_BPRTrainer_LGCNDataset_15.269.pth
Epoch 315/1500, Loss: 0.018734, Time: 82.449s
Test result. Precision: 5.514%@20, 2.364%@100, Recall: 17.981%@20, 37.400%@100, NDCG: 15.278%@20, 21.006%@100, Time: 4.202s
Save model to checkpoints\LightGCN_BPRTrainer_LGCNDataset_15.278.pth
Epoch 316/1500, Loss: 0.018697, Time: 82.559s
Test result. Precision: 5.517%@20, 2.364%@100, Recall: 17.998%@20, 37.410%@100, NDCG: 15.290%@20, 21.015%@100, Time: 3.968s
Save model to checkpoints\LightGCN_BPRTrainer_LGCNDataset_15.290.pth
Epoch 317/1500, Loss: 0.018687, Time: 82.574s
Test result. Precision: 5.523%@20, 2.365%@100, Recall: 17.998%@20, 37.435%@100, NDCG: 15.291%@20, 21.019%@100, Time: 4.015s
Save model to checkpoints\LightGCN_BPRTrainer_LGCNDataset_15.291.pth
Epoch 318/1500, Loss: 0.018624, Time: 82.746s
Test result. Precision: 5.521%@20, 2.364%@100, Recall: 17.996%@20, 37.443%@100, NDCG: 15.299%@20, 21.028%@100, Time: 3.999s
Save model to checkpoints\LightGCN_BPRTrainer_LGCNDataset_15.299.pth
Epoch 319/1500, Loss: 0.018439, Time: 82.543s
Test result. Precision: 5.519%@20, 2.363%@100, Recall: 17.988%@20, 37.422%@100, NDCG: 15.294%@20, 21.020%@100, Time: 4.046s
Save model to checkpoints\LightGCN_BPRTrainer_LGCNDataset_15.294.pth
Epoch 320/1500, Loss: 0.018582, Time: 82.777s
Test result. Precision: 5.520%@20, 2.366%@100, Recall: 17.989%@20, 37.439%@100, NDCG: 15.296%@20, 21.030%@100, Time: 4.046s
Save model to checkpoints\LightGCN_BPRTrainer_LGCNDataset_15.296.pth
Epoch 321/1500, Loss: 0.018543, Time: 82.796s
Test result. Precision: 5.527%@20, 2.366%@100, Recall: 18.022%@20, 37.434%@100, NDCG: 15.306%@20, 21.029%@100, Time: 3.999s
Save model to checkpoints\LightGCN_BPRTrainer_LGCNDataset_15.306.pth
Epoch 322/1500, Loss: 0.018546, Time: 82.918s
Test result. Precision: 5.529%@20, 2.366%@100, Recall: 18.029%@20, 37.425%@100, NDCG: 15.311%@20, 21.030%@100, Time: 4.093s
Save model to checkpoints\LightGCN_BPRTrainer_LGCNDataset_15.311.pth
Epoch 323/1500, Loss: 0.018459, Time: 82.856s
Test result. Precision: 5.531%@20, 2.366%@100, Recall: 18.027%@20, 37.436%@100, NDCG: 15.313%@20, 21.034%@100, Time: 4.108s
Save model to checkpoints\LightGCN_BPRTrainer_LGCNDataset_15.313.pth
Epoch 324/1500, Loss: 0.018553, Time: 82.518s
Test result. Precision: 5.531%@20, 2.367%@100, Recall: 18.028%@20, 37.441%@100, NDCG: 15.313%@20, 21.038%@100, Time: 3.999s
Save model to checkpoints\LightGCN_BPRTrainer_LGCNDataset_15.313.pth
Epoch 325/1500, Loss: 0.018650, Time: 82.887s
Test result. Precision: 5.530%@20, 2.369%@100, Recall: 18.005%@20, 37.469%@100, NDCG: 15.307%@20, 21.045%@100, Time: 4.124s
Save model to checkpoints\LightGCN_BPRTrainer_LGCNDataset_15.307.pth
Epoch 326/1500, Loss: 0.018695, Time: 83.168s
Test result. Precision: 5.528%@20, 2.370%@100, Recall: 18.007%@20, 37.491%@100, NDCG: 15.314%@20, 21.059%@100, Time: 3.999s
Save model to checkpoints\LightGCN_BPRTrainer_LGCNDataset_15.314.pth
Epoch 327/1500, Loss: 0.018557, Time: 82.356s
Test result. Precision: 5.528%@20, 2.370%@100, Recall: 18.025%@20, 37.485%@100, NDCG: 15.319%@20, 21.057%@100, Time: 3.937s
Save model to checkpoints\LightGCN_BPRTrainer_LGCNDataset_15.319.pth
Epoch 328/1500, Loss: 0.018827, Time: 82.637s
Test result. Precision: 5.528%@20, 2.372%@100, Recall: 18.018%@20, 37.506%@100, NDCG: 15.325%@20, 21.072%@100, Time: 4.233s
Save model to checkpoints\LightGCN_BPRTrainer_LGCNDataset_15.325.pth
Epoch 329/1500, Loss: 0.018447, Time: 83.355s
Test result. Precision: 5.526%@20, 2.371%@100, Recall: 18.003%@20, 37.484%@100, NDCG: 15.315%@20, 21.060%@100, Time: 4.253s
Save model to checkpoints\LightGCN_BPRTrainer_LGCNDataset_15.315.pth
Epoch 330/1500, Loss: 0.018295, Time: 82.309s
Test result. Precision: 5.520%@20, 2.371%@100, Recall: 17.980%@20, 37.497%@100, NDCG: 15.291%@20, 21.047%@100, Time: 4.030s
Save model to checkpoints\LightGCN_BPRTrainer_LGCNDataset_15.291.pth
Epoch 331/1500, Loss: 0.018414, Time: 82.814s
Test result. Precision: 5.521%@20, 2.370%@100, Recall: 17.980%@20, 37.489%@100, NDCG: 15.304%@20, 21.056%@100, Time: 3.983s
Save model to checkpoints\LightGCN_BPRTrainer_LGCNDataset_15.304.pth
Epoch 332/1500, Loss: 0.018406, Time: 82.403s
Test result. Precision: 5.521%@20, 2.370%@100, Recall: 17.989%@20, 37.515%@100, NDCG: 15.304%@20, 21.059%@100, Time: 4.202s
Save model to checkpoints\LightGCN_BPRTrainer_LGCNDataset_15.304.pth
Epoch 333/1500, Loss: 0.018439, Time: 83.293s
Test result. Precision: 5.513%@20, 2.369%@100, Recall: 17.949%@20, 37.488%@100, NDCG: 15.290%@20, 21.055%@100, Time: 3.968s
Save model to checkpoints\LightGCN_BPRTrainer_LGCNDataset_15.290.pth
Epoch 334/1500, Loss: 0.018585, Time: 82.950s
Test result. Precision: 5.516%@20, 2.369%@100, Recall: 17.981%@20, 37.465%@100, NDCG: 15.306%@20, 21.057%@100, Time: 3.952s
Save model to checkpoints\LightGCN_BPRTrainer_LGCNDataset_15.306.pth
Epoch 335/1500, Loss: 0.018329, Time: 82.637s
Test result. Precision: 5.529%@20, 2.369%@100, Recall: 18.007%@20, 37.486%@100, NDCG: 15.318%@20, 21.062%@100, Time: 4.077s
Save model to checkpoints\LightGCN_BPRTrainer_LGCNDataset_15.318.pth
Epoch 336/1500, Loss: 0.018333, Time: 82.387s
Test result. Precision: 5.528%@20, 2.371%@100, Recall: 18.000%@20, 37.522%@100, NDCG: 15.321%@20, 21.078%@100, Time: 4.015s
Save model to checkpoints\LightGCN_BPRTrainer_LGCNDataset_15.321.pth
Epoch 337/1500, Loss: 0.018085, Time: 82.356s
Test result. Precision: 5.528%@20, 2.371%@100, Recall: 17.989%@20, 37.526%@100, NDCG: 15.308%@20, 21.066%@100, Time: 4.046s
Save model to checkpoints\LightGCN_BPRTrainer_LGCNDataset_15.308.pth
Epoch 338/1500, Loss: 0.018398, Time: 83.277s
Test result. Precision: 5.524%@20, 2.372%@100, Recall: 17.996%@20, 37.519%@100, NDCG: 15.314%@20, 21.073%@100, Time: 3.952s
Save model to checkpoints\LightGCN_BPRTrainer_LGCNDataset_15.314.pth
Epoch 339/1500, Loss: 0.018380, Time: 82.918s
Test result. Precision: 5.534%@20, 2.371%@100, Recall: 18.032%@20, 37.511%@100, NDCG: 15.324%@20, 21.069%@100, Time: 3.999s
Save model to checkpoints\LightGCN_BPRTrainer_LGCNDataset_15.324.pth
Epoch 340/1500, Loss: 0.018340, Time: 82.434s
Test result. Precision: 5.533%@20, 2.371%@100, Recall: 18.038%@20, 37.515%@100, NDCG: 15.321%@20, 21.064%@100, Time: 4.218s
Save model to checkpoints\LightGCN_BPRTrainer_LGCNDataset_15.321.pth
Epoch 341/1500, Loss: 0.018232, Time: 82.403s
Test result. Precision: 5.540%@20, 2.372%@100, Recall: 18.044%@20, 37.525%@100, NDCG: 15.329%@20, 21.070%@100, Time: 3.952s
Save model to checkpoints\LightGCN_BPRTrainer_LGCNDataset_15.329.pth
Epoch 342/1500, Loss: 0.018417, Time: 82.779s
Test result. Precision: 5.544%@20, 2.372%@100, Recall: 18.051%@20, 37.521%@100, NDCG: 15.339%@20, 21.076%@100, Time: 4.108s
Save model to checkpoints\LightGCN_BPRTrainer_LGCNDataset_15.339.pth
Epoch 343/1500, Loss: 0.018309, Time: 82.449s
Test result. Precision: 5.536%@20, 2.373%@100, Recall: 18.034%@20, 37.540%@100, NDCG: 15.338%@20, 21.088%@100, Time: 4.077s
Save model to checkpoints\LightGCN_BPRTrainer_LGCNDataset_15.338.pth
Epoch 344/1500, Loss: 0.018306, Time: 82.918s
Test result. Precision: 5.539%@20, 2.374%@100, Recall: 18.046%@20, 37.547%@100, NDCG: 15.340%@20, 21.091%@100, Time: 3.983s
Save model to checkpoints\LightGCN_BPRTrainer_LGCNDataset_15.340.pth
Epoch 345/1500, Loss: 0.018156, Time: 82.535s
Test result. Precision: 5.535%@20, 2.373%@100, Recall: 18.043%@20, 37.528%@100, NDCG: 15.333%@20, 21.083%@100, Time: 4.140s
Save model to checkpoints\LightGCN_BPRTrainer_LGCNDataset_15.333.pth
Epoch 346/1500, Loss: 0.018211, Time: 82.809s
Test result. Precision: 5.543%@20, 2.375%@100, Recall: 18.062%@20, 37.557%@100, NDCG: 15.346%@20, 21.095%@100, Time: 4.140s
Save model to checkpoints\LightGCN_BPRTrainer_LGCNDataset_15.346.pth
Epoch 347/1500, Loss: 0.018246, Time: 82.449s
Test result. Precision: 5.545%@20, 2.376%@100, Recall: 18.074%@20, 37.579%@100, NDCG: 15.355%@20, 21.107%@100, Time: 4.140s
Save model to checkpoints\LightGCN_BPRTrainer_LGCNDataset_15.355.pth
Epoch 348/1500, Loss: 0.018053, Time: 82.668s
Test result. Precision: 5.545%@20, 2.375%@100, Recall: 18.071%@20, 37.550%@100, NDCG: 15.353%@20, 21.099%@100, Time: 4.077s
Save model to checkpoints\LightGCN_BPRTrainer_LGCNDataset_15.353.pth
Epoch 349/1500, Loss: 0.018019, Time: 82.892s
Test result. Precision: 5.547%@20, 2.376%@100, Recall: 18.077%@20, 37.584%@100, NDCG: 15.344%@20, 21.098%@100, Time: 4.030s
Save model to checkpoints\LightGCN_BPRTrainer_LGCNDataset_15.344.pth
Epoch 350/1500, Loss: 0.018152, Time: 82.699s
Test result. Precision: 5.543%@20, 2.377%@100, Recall: 18.084%@20, 37.608%@100, NDCG: 15.336%@20, 21.095%@100, Time: 3.983s
Save model to checkpoints\LightGCN_BPRTrainer_LGCNDataset_15.336.pth
Epoch 351/1500, Loss: 0.018455, Time: 83.231s
Test result. Precision: 5.543%@20, 2.375%@100, Recall: 18.098%@20, 37.580%@100, NDCG: 15.337%@20, 21.086%@100, Time: 4.124s
Save model to checkpoints\LightGCN_BPRTrainer_LGCNDataset_15.337.pth
Epoch 352/1500, Loss: 0.018224, Time: 82.777s
Test result. Precision: 5.545%@20, 2.377%@100, Recall: 18.097%@20, 37.598%@100, NDCG: 15.353%@20, 21.108%@100, Time: 4.202s
Save model to checkpoints\LightGCN_BPRTrainer_LGCNDataset_15.353.pth
Epoch 353/1500, Loss: 0.018188, Time: 82.403s
Test result. Precision: 5.550%@20, 2.380%@100, Recall: 18.119%@20, 37.646%@100, NDCG: 15.361%@20, 21.121%@100, Time: 3.983s
Save model to checkpoints\LightGCN_BPRTrainer_LGCNDataset_15.361.pth
Epoch 354/1500, Loss: 0.017994, Time: 82.621s
Test result. Precision: 5.550%@20, 2.379%@100, Recall: 18.103%@20, 37.628%@100, NDCG: 15.357%@20, 21.116%@100, Time: 4.124s
Save model to checkpoints\LightGCN_BPRTrainer_LGCNDataset_15.357.pth
Epoch 355/1500, Loss: 0.018196, Time: 82.407s
Test result. Precision: 5.546%@20, 2.380%@100, Recall: 18.096%@20, 37.610%@100, NDCG: 15.362%@20, 21.121%@100, Time: 4.124s
Save model to checkpoints\LightGCN_BPRTrainer_LGCNDataset_15.362.pth
Epoch 356/1500, Loss: 0.018221, Time: 82.324s
Test result. Precision: 5.543%@20, 2.378%@100, Recall: 18.089%@20, 37.578%@100, NDCG: 15.357%@20, 21.110%@100, Time: 3.983s
Save model to checkpoints\LightGCN_BPRTrainer_LGCNDataset_15.357.pth
Epoch 357/1500, Loss: 0.018175, Time: 82.762s
Test result. Precision: 5.543%@20, 2.377%@100, Recall: 18.097%@20, 37.594%@100, NDCG: 15.359%@20, 21.114%@100, Time: 4.046s
Save model to checkpoints\LightGCN_BPRTrainer_LGCNDataset_15.359.pth
Epoch 358/1500, Loss: 0.018194, Time: 82.449s
Test result. Precision: 5.547%@20, 2.377%@100, Recall: 18.104%@20, 37.585%@100, NDCG: 15.360%@20, 21.110%@100, Time: 3.999s
Save model to checkpoints\LightGCN_BPRTrainer_LGCNDataset_15.360.pth
Epoch 359/1500, Loss: 0.017927, Time: 82.590s
Test result. Precision: 5.541%@20, 2.377%@100, Recall: 18.080%@20, 37.575%@100, NDCG: 15.347%@20, 21.103%@100, Time: 4.093s
Save model to checkpoints\LightGCN_BPRTrainer_LGCNDataset_15.347.pth
Epoch 360/1500, Loss: 0.018006, Time: 82.356s
Test result. Precision: 5.544%@20, 2.377%@100, Recall: 18.097%@20, 37.567%@100, NDCG: 15.346%@20, 21.094%@100, Time: 3.983s
Save model to checkpoints\LightGCN_BPRTrainer_LGCNDataset_15.346.pth
Epoch 361/1500, Loss: 0.017929, Time: 82.652s
Test result. Precision: 5.549%@20, 2.377%@100, Recall: 18.097%@20, 37.583%@100, NDCG: 15.362%@20, 21.112%@100, Time: 4.062s
Save model to checkpoints\LightGCN_BPRTrainer_LGCNDataset_15.362.pth
Epoch 362/1500, Loss: 0.018104, Time: 82.764s
Test result. Precision: 5.542%@20, 2.377%@100, Recall: 18.078%@20, 37.602%@100, NDCG: 15.352%@20, 21.114%@100, Time: 4.249s
Save model to checkpoints\LightGCN_BPRTrainer_LGCNDataset_15.352.pth
Epoch 363/1500, Loss: 0.017947, Time: 82.793s
Test result. Precision: 5.545%@20, 2.379%@100, Recall: 18.084%@20, 37.606%@100, NDCG: 15.350%@20, 21.111%@100, Time: 4.015s
Save model to checkpoints\LightGCN_BPRTrainer_LGCNDataset_15.350.pth
Epoch 364/1500, Loss: 0.018122, Time: 82.668s
Test result. Precision: 5.545%@20, 2.377%@100, Recall: 18.082%@20, 37.602%@100, NDCG: 15.358%@20, 21.117%@100, Time: 4.296s
Save model to checkpoints\LightGCN_BPRTrainer_LGCNDataset_15.358.pth
Epoch 365/1500, Loss: 0.018031, Time: 82.363s
Test result. Precision: 5.544%@20, 2.377%@100, Recall: 18.086%@20, 37.612%@100, NDCG: 15.353%@20, 21.115%@100, Time: 4.124s
Save model to checkpoints\LightGCN_BPRTrainer_LGCNDataset_15.353.pth
Epoch 366/1500, Loss: 0.017989, Time: 83.184s
Test result. Precision: 5.549%@20, 2.378%@100, Recall: 18.094%@20, 37.619%@100, NDCG: 15.365%@20, 21.126%@100, Time: 4.108s
Save model to checkpoints\LightGCN_BPRTrainer_LGCNDataset_15.365.pth
Epoch 367/1500, Loss: 0.018034, Time: 82.715s
Test result. Precision: 5.551%@20, 2.380%@100, Recall: 18.105%@20, 37.630%@100, NDCG: 15.377%@20, 21.141%@100, Time: 4.296s
Save model to checkpoints\LightGCN_BPRTrainer_LGCNDataset_15.377.pth
Epoch 368/1500, Loss: 0.018066, Time: 82.449s
Test result. Precision: 5.547%@20, 2.381%@100, Recall: 18.079%@20, 37.659%@100, NDCG: 15.371%@20, 21.149%@100, Time: 3.999s
Save model to checkpoints\LightGCN_BPRTrainer_LGCNDataset_15.371.pth
Epoch 369/1500, Loss: 0.017866, Time: 82.390s
Test result. Precision: 5.553%@20, 2.382%@100, Recall: 18.104%@20, 37.674%@100, NDCG: 15.375%@20, 21.146%@100, Time: 4.249s
Save model to checkpoints\LightGCN_BPRTrainer_LGCNDataset_15.375.pth
Epoch 370/1500, Loss: 0.018045, Time: 82.403s
Test result. Precision: 5.548%@20, 2.382%@100, Recall: 18.090%@20, 37.664%@100, NDCG: 15.371%@20, 21.148%@100, Time: 3.937s
Save model to checkpoints\LightGCN_BPRTrainer_LGCNDataset_15.371.pth
Epoch 371/1500, Loss: 0.017728, Time: 82.528s
Test result. Precision: 5.550%@20, 2.381%@100, Recall: 18.098%@20, 37.652%@100, NDCG: 15.377%@20, 21.148%@100, Time: 4.046s
Save model to checkpoints\LightGCN_BPRTrainer_LGCNDataset_15.377.pth
Epoch 372/1500, Loss: 0.017742, Time: 82.278s
Test result. Precision: 5.546%@20, 2.383%@100, Recall: 18.070%@20, 37.681%@100, NDCG: 15.361%@20, 21.148%@100, Time: 4.202s
Save model to checkpoints\LightGCN_BPRTrainer_LGCNDataset_15.361.pth
Epoch 373/1500, Loss: 0.018106, Time: 82.481s
Test result. Precision: 5.545%@20, 2.382%@100, Recall: 18.069%@20, 37.651%@100, NDCG: 15.367%@20, 21.149%@100, Time: 4.108s
Save model to checkpoints\LightGCN_BPRTrainer_LGCNDataset_15.367.pth
Epoch 374/1500, Loss: 0.017869, Time: 83.309s
Test result. Precision: 5.545%@20, 2.381%@100, Recall: 18.072%@20, 37.610%@100, NDCG: 15.378%@20, 21.149%@100, Time: 4.171s
Save model to checkpoints\LightGCN_BPRTrainer_LGCNDataset_15.378.pth
Epoch 375/1500, Loss: 0.017981, Time: 82.309s
Test result. Precision: 5.542%@20, 2.382%@100, Recall: 18.049%@20, 37.653%@100, NDCG: 15.375%@20, 21.164%@100, Time: 4.124s
Save model to checkpoints\LightGCN_BPRTrainer_LGCNDataset_15.375.pth
Epoch 376/1500, Loss: 0.017976, Time: 82.472s
Test result. Precision: 5.535%@20, 2.384%@100, Recall: 18.024%@20, 37.691%@100, NDCG: 15.359%@20, 21.168%@100, Time: 4.108s
Save model to checkpoints\LightGCN_BPRTrainer_LGCNDataset_15.359.pth
Epoch 377/1500, Loss: 0.017948, Time: 82.746s
Test result. Precision: 5.540%@20, 2.384%@100, Recall: 18.060%@20, 37.688%@100, NDCG: 15.377%@20, 21.175%@100, Time: 4.233s
Save model to checkpoints\LightGCN_BPRTrainer_LGCNDataset_15.377.pth
Epoch 378/1500, Loss: 0.017961, Time: 82.715s
Test result. Precision: 5.539%@20, 2.383%@100, Recall: 18.047%@20, 37.689%@100, NDCG: 15.374%@20, 21.174%@100, Time: 4.077s
Save model to checkpoints\LightGCN_BPRTrainer_LGCNDataset_15.374.pth
Epoch 379/1500, Loss: 0.017684, Time: 82.918s
Test result. Precision: 5.547%@20, 2.385%@100, Recall: 18.086%@20, 37.701%@100, NDCG: 15.387%@20, 21.178%@100, Time: 4.062s
Save model to checkpoints\LightGCN_BPRTrainer_LGCNDataset_15.387.pth
Epoch 380/1500, Loss: 0.017915, Time: 82.793s
Test result. Precision: 5.544%@20, 2.386%@100, Recall: 18.069%@20, 37.727%@100, NDCG: 15.381%@20, 21.184%@100, Time: 4.171s
Save model to checkpoints\LightGCN_BPRTrainer_LGCNDataset_15.381.pth
Epoch 381/1500, Loss: 0.018162, Time: 82.684s
Test result. Precision: 5.546%@20, 2.386%@100, Recall: 18.071%@20, 37.709%@100, NDCG: 15.378%@20, 21.178%@100, Time: 4.202s
Save model to checkpoints\LightGCN_BPRTrainer_LGCNDataset_15.378.pth
Epoch 382/1500, Loss: 0.017935, Time: 82.793s
Test result. Precision: 5.551%@20, 2.387%@100, Recall: 18.080%@20, 37.708%@100, NDCG: 15.378%@20, 21.174%@100, Time: 4.108s
Save model to checkpoints\LightGCN_BPRTrainer_LGCNDataset_15.378.pth
Epoch 383/1500, Loss: 0.017502, Time: 82.790s
Test result. Precision: 5.544%@20, 2.385%@100, Recall: 18.058%@20, 37.679%@100, NDCG: 15.363%@20, 21.160%@100, Time: 4.124s
Save model to checkpoints\LightGCN_BPRTrainer_LGCNDataset_15.363.pth
Epoch 384/1500, Loss: 0.017706, Time: 83.559s
Test result. Precision: 5.548%@20, 2.386%@100, Recall: 18.071%@20, 37.721%@100, NDCG: 15.379%@20, 21.181%@100, Time: 4.093s
Save model to checkpoints\LightGCN_BPRTrainer_LGCNDataset_15.379.pth
Epoch 385/1500, Loss: 0.017659, Time: 82.387s
Test result. Precision: 5.547%@20, 2.387%@100, Recall: 18.066%@20, 37.741%@100, NDCG: 15.385%@20, 21.193%@100, Time: 4.015s
Save model to checkpoints\LightGCN_BPRTrainer_LGCNDataset_15.385.pth
Epoch 386/1500, Loss: 0.017554, Time: 82.290s
Test result. Precision: 5.546%@20, 2.386%@100, Recall: 18.062%@20, 37.724%@100, NDCG: 15.385%@20, 21.191%@100, Time: 3.999s
Save model to checkpoints\LightGCN_BPRTrainer_LGCNDataset_15.385.pth
Epoch 387/1500, Loss: 0.017868, Time: 83.621s
Test result. Precision: 5.551%@20, 2.388%@100, Recall: 18.072%@20, 37.733%@100, NDCG: 15.397%@20, 21.202%@100, Time: 4.062s
Save model to checkpoints\LightGCN_BPRTrainer_LGCNDataset_15.397.pth
Epoch 388/1500, Loss: 0.018001, Time: 82.590s
Test result. Precision: 5.552%@20, 2.388%@100, Recall: 18.086%@20, 37.737%@100, NDCG: 15.405%@20, 21.208%@100, Time: 4.077s
Save model to checkpoints\LightGCN_BPRTrainer_LGCNDataset_15.405.pth
Epoch 389/1500, Loss: 0.017916, Time: 82.590s
Test result. Precision: 5.562%@20, 2.390%@100, Recall: 18.123%@20, 37.763%@100, NDCG: 15.419%@20, 21.216%@100, Time: 3.999s
Save model to checkpoints\LightGCN_BPRTrainer_LGCNDataset_15.419.pth
Epoch 390/1500, Loss: 0.017816, Time: 82.293s
Test result. Precision: 5.561%@20, 2.390%@100, Recall: 18.112%@20, 37.762%@100, NDCG: 15.411%@20, 21.213%@100, Time: 4.015s
Save model to checkpoints\LightGCN_BPRTrainer_LGCNDataset_15.411.pth
Epoch 391/1500, Loss: 0.017773, Time: 82.512s
Test result. Precision: 5.564%@20, 2.390%@100, Recall: 18.113%@20, 37.769%@100, NDCG: 15.403%@20, 21.204%@100, Time: 4.077s
Save model to checkpoints\LightGCN_BPRTrainer_LGCNDataset_15.403.pth
Epoch 392/1500, Loss: 0.017800, Time: 82.512s
Test result. Precision: 5.564%@20, 2.391%@100, Recall: 18.121%@20, 37.788%@100, NDCG: 15.418%@20, 21.221%@100, Time: 4.062s
Save model to checkpoints\LightGCN_BPRTrainer_LGCNDataset_15.418.pth
Epoch 393/1500, Loss: 0.017667, Time: 82.777s
Test result. Precision: 5.555%@20, 2.389%@100, Recall: 18.096%@20, 37.786%@100, NDCG: 15.406%@20, 21.217%@100, Time: 4.358s
Save model to checkpoints\LightGCN_BPRTrainer_LGCNDataset_15.406.pth
Epoch 394/1500, Loss: 0.017903, Time: 82.543s
Test result. Precision: 5.553%@20, 2.391%@100, Recall: 18.066%@20, 37.820%@100, NDCG: 15.389%@20, 21.218%@100, Time: 4.187s
Save model to checkpoints\LightGCN_BPRTrainer_LGCNDataset_15.389.pth
Epoch 395/1500, Loss: 0.017746, Time: 82.590s
Test result. Precision: 5.552%@20, 2.391%@100, Recall: 18.082%@20, 37.808%@100, NDCG: 15.393%@20, 21.216%@100, Time: 4.202s
Save model to checkpoints\LightGCN_BPRTrainer_LGCNDataset_15.393.pth
Epoch 396/1500, Loss: 0.017938, Time: 83.428s
Test result. Precision: 5.555%@20, 2.389%@100, Recall: 18.077%@20, 37.789%@100, NDCG: 15.390%@20, 21.207%@100, Time: 4.046s
Save model to checkpoints\LightGCN_BPRTrainer_LGCNDataset_15.390.pth
Epoch 397/1500, Loss: 0.017699, Time: 82.481s
Test result. Precision: 5.557%@20, 2.389%@100, Recall: 18.090%@20, 37.788%@100, NDCG: 15.395%@20, 21.208%@100, Time: 3.952s
Save model to checkpoints\LightGCN_BPRTrainer_LGCNDataset_15.395.pth
Epoch 398/1500, Loss: 0.017923, Time: 82.715s
Test result. Precision: 5.562%@20, 2.391%@100, Recall: 18.104%@20, 37.810%@100, NDCG: 15.406%@20, 21.222%@100, Time: 4.124s
Save model to checkpoints\LightGCN_BPRTrainer_LGCNDataset_15.406.pth
Epoch 399/1500, Loss: 0.017627, Time: 82.715s
Test result. Precision: 5.555%@20, 2.391%@100, Recall: 18.069%@20, 37.824%@100, NDCG: 15.401%@20, 21.230%@100, Time: 4.030s
Save model to checkpoints\LightGCN_BPRTrainer_LGCNDataset_15.401.pth
Epoch 400/1500, Loss: 0.017656, Time: 82.965s
Test result. Precision: 5.562%@20, 2.391%@100, Recall: 18.092%@20, 37.825%@100, NDCG: 15.410%@20, 21.231%@100, Time: 4.077s
Save model to checkpoints\LightGCN_BPRTrainer_LGCNDataset_15.410.pth
Epoch 401/1500, Loss: 0.017856, Time: 82.626s
Test result. Precision: 5.557%@20, 2.390%@100, Recall: 18.071%@20, 37.789%@100, NDCG: 15.406%@20, 21.227%@100, Time: 4.140s
Save model to checkpoints\LightGCN_BPRTrainer_LGCNDataset_15.406.pth
Epoch 402/1500, Loss: 0.017635, Time: 82.527s
Test result. Precision: 5.556%@20, 2.390%@100, Recall: 18.085%@20, 37.799%@100, NDCG: 15.410%@20, 21.229%@100, Time: 3.968s
Save model to checkpoints\LightGCN_BPRTrainer_LGCNDataset_15.410.pth
Epoch 403/1500, Loss: 0.017738, Time: 82.512s
Test result. Precision: 5.555%@20, 2.392%@100, Recall: 18.070%@20, 37.843%@100, NDCG: 15.405%@20, 21.240%@100, Time: 4.030s
Save model to checkpoints\LightGCN_BPRTrainer_LGCNDataset_15.405.pth
Epoch 404/1500, Loss: 0.017751, Time: 82.829s
Test result. Precision: 5.557%@20, 2.392%@100, Recall: 18.075%@20, 37.824%@100, NDCG: 15.410%@20, 21.239%@100, Time: 3.937s
Save model to checkpoints\LightGCN_BPRTrainer_LGCNDataset_15.410.pth
Epoch 405/1500, Loss: 0.017679, Time: 82.309s
Test result. Precision: 5.558%@20, 2.391%@100, Recall: 18.088%@20, 37.811%@100, NDCG: 15.410%@20, 21.231%@100, Time: 4.077s
Save model to checkpoints\LightGCN_BPRTrainer_LGCNDataset_15.410.pth
Epoch 406/1500, Loss: 0.017678, Time: 82.543s
Test result. Precision: 5.559%@20, 2.391%@100, Recall: 18.079%@20, 37.837%@100, NDCG: 15.407%@20, 21.235%@100, Time: 3.952s
Save model to checkpoints\LightGCN_BPRTrainer_LGCNDataset_15.407.pth
Epoch 407/1500, Loss: 0.017699, Time: 82.574s
Test result. Precision: 5.567%@20, 2.393%@100, Recall: 18.110%@20, 37.864%@100, NDCG: 15.413%@20, 21.237%@100, Time: 4.077s
Save model to checkpoints\LightGCN_BPRTrainer_LGCNDataset_15.413.pth
Epoch 408/1500, Loss: 0.017779, Time: 82.902s
Test result. Precision: 5.562%@20, 2.392%@100, Recall: 18.086%@20, 37.847%@100, NDCG: 15.397%@20, 21.225%@100, Time: 3.999s
Save model to checkpoints\LightGCN_BPRTrainer_LGCNDataset_15.397.pth
Epoch 409/1500, Loss: 0.017433, Time: 82.720s
Test result. Precision: 5.562%@20, 2.390%@100, Recall: 18.076%@20, 37.797%@100, NDCG: 15.388%@20, 21.206%@100, Time: 4.093s
Save model to checkpoints\LightGCN_BPRTrainer_LGCNDataset_15.388.pth
Epoch 410/1500, Loss: 0.017862, Time: 82.574s
Test result. Precision: 5.562%@20, 2.390%@100, Recall: 18.085%@20, 37.801%@100, NDCG: 15.405%@20, 21.222%@100, Time: 4.062s
Save model to checkpoints\LightGCN_BPRTrainer_LGCNDataset_15.405.pth
Epoch 411/1500, Loss: 0.017671, Time: 82.543s
Test result. Precision: 5.556%@20, 2.391%@100, Recall: 18.064%@20, 37.813%@100, NDCG: 15.393%@20, 21.220%@100, Time: 4.093s
Save model to checkpoints\LightGCN_BPRTrainer_LGCNDataset_15.393.pth
Epoch 412/1500, Loss: 0.017426, Time: 82.309s
Test result. Precision: 5.560%@20, 2.390%@100, Recall: 18.061%@20, 37.812%@100, NDCG: 15.396%@20, 21.220%@100, Time: 3.968s
Save model to checkpoints\LightGCN_BPRTrainer_LGCNDataset_15.396.pth
Epoch 413/1500, Loss: 0.017577, Time: 82.324s
Test result. Precision: 5.557%@20, 2.389%@100, Recall: 18.067%@20, 37.795%@100, NDCG: 15.390%@20, 21.211%@100, Time: 3.937s
Save model to checkpoints\LightGCN_BPRTrainer_LGCNDataset_15.390.pth
Epoch 414/1500, Loss: 0.017476, Time: 82.324s
Test result. Precision: 5.555%@20, 2.391%@100, Recall: 18.050%@20, 37.792%@100, NDCG: 15.390%@20, 21.219%@100, Time: 4.030s
Save model to checkpoints\LightGCN_BPRTrainer_LGCNDataset_15.390.pth
Epoch 415/1500, Loss: 0.017699, Time: 82.543s
Test result. Precision: 5.557%@20, 2.392%@100, Recall: 18.058%@20, 37.831%@100, NDCG: 15.397%@20, 21.231%@100, Time: 3.968s
Save model to checkpoints\LightGCN_BPRTrainer_LGCNDataset_15.397.pth
Epoch 416/1500, Loss: 0.017675, Time: 82.309s
Test result. Precision: 5.553%@20, 2.392%@100, Recall: 18.053%@20, 37.815%@100, NDCG: 15.396%@20, 21.230%@100, Time: 3.999s
Save model to checkpoints\LightGCN_BPRTrainer_LGCNDataset_15.396.pth
Epoch 417/1500, Loss: 0.017432, Time: 82.324s
Test result. Precision: 5.555%@20, 2.392%@100, Recall: 18.054%@20, 37.818%@100, NDCG: 15.397%@20, 21.231%@100, Time: 4.077s
Save model to checkpoints\LightGCN_BPRTrainer_LGCNDataset_15.397.pth
Epoch 418/1500, Loss: 0.017560, Time: 82.731s
Test result. Precision: 5.559%@20, 2.391%@100, Recall: 18.081%@20, 37.816%@100, NDCG: 15.401%@20, 21.225%@100, Time: 4.062s
Save model to checkpoints\LightGCN_BPRTrainer_LGCNDataset_15.401.pth
Epoch 419/1500, Loss: 0.017602, Time: 82.215s
Test result. Precision: 5.556%@20, 2.391%@100, Recall: 18.070%@20, 37.811%@100, NDCG: 15.398%@20, 21.224%@100, Time: 4.030s
Save model to checkpoints\LightGCN_BPRTrainer_LGCNDataset_15.398.pth
Epoch 420/1500, Loss: 0.017685, Time: 82.574s
Test result. Precision: 5.557%@20, 2.391%@100, Recall: 18.087%@20, 37.797%@100, NDCG: 15.405%@20, 21.225%@100, Time: 4.062s
Save model to checkpoints\LightGCN_BPRTrainer_LGCNDataset_15.405.pth
Epoch 421/1500, Loss: 0.017447, Time: 82.387s
Test result. Precision: 5.558%@20, 2.393%@100, Recall: 18.097%@20, 37.837%@100, NDCG: 15.401%@20, 21.229%@100, Time: 4.015s
Save model to checkpoints\LightGCN_BPRTrainer_LGCNDataset_15.401.pth
Epoch 422/1500, Loss: 0.017414, Time: 82.496s
Test result. Precision: 5.563%@20, 2.392%@100, Recall: 18.100%@20, 37.798%@100, NDCG: 15.407%@20, 21.226%@100, Time: 3.999s
Save model to checkpoints\LightGCN_BPRTrainer_LGCNDataset_15.407.pth
Epoch 423/1500, Loss: 0.017547, Time: 82.387s
Test result. Precision: 5.563%@20, 2.391%@100, Recall: 18.110%@20, 37.790%@100, NDCG: 15.404%@20, 21.218%@100, Time: 4.015s
Save model to checkpoints\LightGCN_BPRTrainer_LGCNDataset_15.404.pth
Epoch 424/1500, Loss: 0.017551, Time: 82.668s
Test result. Precision: 5.560%@20, 2.391%@100, Recall: 18.098%@20, 37.805%@100, NDCG: 15.402%@20, 21.224%@100, Time: 4.046s
Save model to checkpoints\LightGCN_BPRTrainer_LGCNDataset_15.402.pth
Epoch 425/1500, Loss: 0.017539, Time: 82.434s
Test result. Precision: 5.552%@20, 2.393%@100, Recall: 18.085%@20, 37.810%@100, NDCG: 15.399%@20, 21.231%@100, Time: 4.030s
Save model to checkpoints\LightGCN_BPRTrainer_LGCNDataset_15.399.pth
Epoch 426/1500, Loss: 0.017612, Time: 82.449s
Test result. Precision: 5.559%@20, 2.393%@100, Recall: 18.087%@20, 37.832%@100, NDCG: 15.401%@20, 21.233%@100, Time: 4.140s
Save model to checkpoints\LightGCN_BPRTrainer_LGCNDataset_15.401.pth
Epoch 427/1500, Loss: 0.017518, Time: 82.449s
Test result. Precision: 5.564%@20, 2.396%@100, Recall: 18.111%@20, 37.868%@100, NDCG: 15.417%@20, 21.253%@100, Time: 4.093s
Save model to checkpoints\LightGCN_BPRTrainer_LGCNDataset_15.417.pth
Epoch 428/1500, Loss: 0.017421, Time: 82.887s
Test result. Precision: 5.560%@20, 2.396%@100, Recall: 18.093%@20, 37.883%@100, NDCG: 15.414%@20, 21.259%@100, Time: 4.015s
Save model to checkpoints\LightGCN_BPRTrainer_LGCNDataset_15.414.pth
Epoch 429/1500, Loss: 0.017683, Time: 83.121s
Test result. Precision: 5.561%@20, 2.397%@100, Recall: 18.096%@20, 37.872%@100, NDCG: 15.417%@20, 21.260%@100, Time: 4.062s
Save model to checkpoints\LightGCN_BPRTrainer_LGCNDataset_15.417.pth
Epoch 430/1500, Loss: 0.017476, Time: 82.330s
Test result. Precision: 5.559%@20, 2.397%@100, Recall: 18.096%@20, 37.875%@100, NDCG: 15.412%@20, 21.258%@100, Time: 4.046s
Save model to checkpoints\LightGCN_BPRTrainer_LGCNDataset_15.412.pth
Epoch 431/1500, Loss: 0.017349, Time: 82.534s
Test result. Precision: 5.559%@20, 2.398%@100, Recall: 18.079%@20, 37.895%@100, NDCG: 15.410%@20, 21.264%@100, Time: 4.124s
Save model to checkpoints\LightGCN_BPRTrainer_LGCNDataset_15.410.pth
Epoch 432/1500, Loss: 0.017271, Time: 82.762s
Test result. Precision: 5.563%@20, 2.396%@100, Recall: 18.093%@20, 37.872%@100, NDCG: 15.410%@20, 21.252%@100, Time: 3.937s
Save model to checkpoints\LightGCN_BPRTrainer_LGCNDataset_15.410.pth
Epoch 433/1500, Loss: 0.017376, Time: 82.418s
Test result. Precision: 5.566%@20, 2.395%@100, Recall: 18.122%@20, 37.859%@100, NDCG: 15.416%@20, 21.245%@100, Time: 4.015s
Save model to checkpoints\LightGCN_BPRTrainer_LGCNDataset_15.416.pth
Epoch 434/1500, Loss: 0.017437, Time: 83.246s
Test result. Precision: 5.568%@20, 2.398%@100, Recall: 18.116%@20, 37.876%@100, NDCG: 15.419%@20, 21.257%@100, Time: 4.108s
Save model to checkpoints\LightGCN_BPRTrainer_LGCNDataset_15.419.pth
Epoch 435/1500, Loss: 0.017340, Time: 82.715s
Test result. Precision: 5.566%@20, 2.397%@100, Recall: 18.114%@20, 37.868%@100, NDCG: 15.419%@20, 21.256%@100, Time: 4.046s
Save model to checkpoints\LightGCN_BPRTrainer_LGCNDataset_15.419.pth
Epoch 436/1500, Loss: 0.017414, Time: 82.324s
Test result. Precision: 5.557%@20, 2.395%@100, Recall: 18.104%@20, 37.853%@100, NDCG: 15.408%@20, 21.246%@100, Time: 3.921s
Save model to checkpoints\LightGCN_BPRTrainer_LGCNDataset_15.408.pth
Epoch 437/1500, Loss: 0.017573, Time: 82.324s
Test result. Precision: 5.557%@20, 2.396%@100, Recall: 18.094%@20, 37.840%@100, NDCG: 15.407%@20, 21.247%@100, Time: 4.077s
Save model to checkpoints\LightGCN_BPRTrainer_LGCNDataset_15.407.pth
Epoch 438/1500, Loss: 0.017254, Time: 82.356s
Test result. Precision: 5.569%@20, 2.396%@100, Recall: 18.123%@20, 37.869%@100, NDCG: 15.418%@20, 21.251%@100, Time: 4.187s
Save model to checkpoints\LightGCN_BPRTrainer_LGCNDataset_15.418.pth
Epoch 439/1500, Loss: 0.017152, Time: 82.746s
Test result. Precision: 5.564%@20, 2.394%@100, Recall: 18.112%@20, 37.847%@100, NDCG: 15.424%@20, 21.257%@100, Time: 3.968s
Save model to checkpoints\LightGCN_BPRTrainer_LGCNDataset_15.424.pth
Epoch 440/1500, Loss: 0.017424, Time: 82.262s
Test result. Precision: 5.568%@20, 2.395%@100, Recall: 18.125%@20, 37.870%@100, NDCG: 15.427%@20, 21.261%@100, Time: 4.030s
Save model to checkpoints\LightGCN_BPRTrainer_LGCNDataset_15.427.pth
Epoch 441/1500, Loss: 0.017094, Time: 82.559s
Test result. Precision: 5.567%@20, 2.394%@100, Recall: 18.133%@20, 37.842%@100, NDCG: 15.420%@20, 21.245%@100, Time: 4.077s
Save model to checkpoints\LightGCN_BPRTrainer_LGCNDataset_15.420.pth
Epoch 442/1500, Loss: 0.017154, Time: 82.590s
Test result. Precision: 5.570%@20, 2.396%@100, Recall: 18.158%@20, 37.861%@100, NDCG: 15.432%@20, 21.256%@100, Time: 3.999s
Save model to checkpoints\LightGCN_BPRTrainer_LGCNDataset_15.432.pth
Epoch 443/1500, Loss: 0.017237, Time: 82.668s
Test result. Precision: 5.573%@20, 2.397%@100, Recall: 18.146%@20, 37.867%@100, NDCG: 15.420%@20, 21.247%@100, Time: 4.015s
Save model to checkpoints\LightGCN_BPRTrainer_LGCNDataset_15.420.pth
Epoch 444/1500, Loss: 0.017284, Time: 82.262s
Test result. Precision: 5.574%@20, 2.397%@100, Recall: 18.151%@20, 37.851%@100, NDCG: 15.427%@20, 21.249%@100, Time: 3.952s
Save model to checkpoints\LightGCN_BPRTrainer_LGCNDataset_15.427.pth
Epoch 445/1500, Loss: 0.017190, Time: 82.830s
Test result. Precision: 5.574%@20, 2.398%@100, Recall: 18.139%@20, 37.874%@100, NDCG: 15.419%@20, 21.251%@100, Time: 4.046s
Save model to checkpoints\LightGCN_BPRTrainer_LGCNDataset_15.419.pth
Epoch 446/1500, Loss: 0.017368, Time: 82.684s
Test result. Precision: 5.575%@20, 2.399%@100, Recall: 18.133%@20, 37.893%@100, NDCG: 15.413%@20, 21.250%@100, Time: 4.046s
Save model to checkpoints\LightGCN_BPRTrainer_LGCNDataset_15.413.pth
Epoch 447/1500, Loss: 0.017096, Time: 82.309s
Test result. Precision: 5.577%@20, 2.397%@100, Recall: 18.146%@20, 37.873%@100, NDCG: 15.420%@20, 21.248%@100, Time: 3.968s
Save model to checkpoints\LightGCN_BPRTrainer_LGCNDataset_15.420.pth
Epoch 448/1500, Loss: 0.017327, Time: 82.410s
Test result. Precision: 5.569%@20, 2.397%@100, Recall: 18.127%@20, 37.877%@100, NDCG: 15.413%@20, 21.250%@100, Time: 4.046s
Save model to checkpoints\LightGCN_BPRTrainer_LGCNDataset_15.413.pth
Epoch 449/1500, Loss: 0.017336, Time: 82.559s
Test result. Precision: 5.571%@20, 2.397%@100, Recall: 18.134%@20, 37.877%@100, NDCG: 15.415%@20, 21.248%@100, Time: 4.015s
Save model to checkpoints\LightGCN_BPRTrainer_LGCNDataset_15.415.pth
Epoch 450/1500, Loss: 0.017259, Time: 83.090s
Test result. Precision: 5.570%@20, 2.398%@100, Recall: 18.119%@20, 37.885%@100, NDCG: 15.408%@20, 21.249%@100, Time: 4.046s
Save model to checkpoints\LightGCN_BPRTrainer_LGCNDataset_15.408.pth
Epoch 451/1500, Loss: 0.017432, Time: 82.543s
Test result. Precision: 5.574%@20, 2.399%@100, Recall: 18.151%@20, 37.877%@100, NDCG: 15.425%@20, 21.255%@100, Time: 4.030s
Save model to checkpoints\LightGCN_BPRTrainer_LGCNDataset_15.425.pth
Epoch 452/1500, Loss: 0.017249, Time: 82.528s
Test result. Precision: 5.578%@20, 2.399%@100, Recall: 18.160%@20, 37.881%@100, NDCG: 15.434%@20, 21.261%@100, Time: 4.093s
Save model to checkpoints\LightGCN_BPRTrainer_LGCNDataset_15.434.pth
Epoch 453/1500, Loss: 0.017362, Time: 82.481s
Test result. Precision: 5.573%@20, 2.398%@100, Recall: 18.134%@20, 37.882%@100, NDCG: 15.421%@20, 21.256%@100, Time: 4.155s
Save model to checkpoints\LightGCN_BPRTrainer_LGCNDataset_15.421.pth
Epoch 454/1500, Loss: 0.017167, Time: 82.515s
Test result. Precision: 5.573%@20, 2.400%@100, Recall: 18.133%@20, 37.919%@100, NDCG: 15.426%@20, 21.273%@100, Time: 3.983s
Save model to checkpoints\LightGCN_BPRTrainer_LGCNDataset_15.426.pth
Epoch 455/1500, Loss: 0.017134, Time: 82.481s
Test result. Precision: 5.578%@20, 2.400%@100, Recall: 18.143%@20, 37.932%@100, NDCG: 15.423%@20, 21.267%@100, Time: 3.999s
Save model to checkpoints\LightGCN_BPRTrainer_LGCNDataset_15.423.pth
Epoch 456/1500, Loss: 0.017400, Time: 82.512s
Test result. Precision: 5.574%@20, 2.400%@100, Recall: 18.120%@20, 37.915%@100, NDCG: 15.420%@20, 21.267%@100, Time: 4.030s
Save model to checkpoints\LightGCN_BPRTrainer_LGCNDataset_15.420.pth
Epoch 457/1500, Loss: 0.017262, Time: 82.590s
Test result. Precision: 5.577%@20, 2.400%@100, Recall: 18.137%@20, 37.916%@100, NDCG: 15.423%@20, 21.266%@100, Time: 3.968s
Save model to checkpoints\LightGCN_BPRTrainer_LGCNDataset_15.423.pth
Epoch 458/1500, Loss: 0.017181, Time: 82.528s
Test result. Precision: 5.567%@20, 2.399%@100, Recall: 18.103%@20, 37.911%@100, NDCG: 15.414%@20, 21.268%@100, Time: 4.015s
Save model to checkpoints\LightGCN_BPRTrainer_LGCNDataset_15.414.pth
Epoch 459/1500, Loss: 0.017324, Time: 83.059s
Test result. Precision: 5.567%@20, 2.401%@100, Recall: 18.112%@20, 37.933%@100, NDCG: 15.420%@20, 21.280%@100, Time: 3.968s
Save model to checkpoints\LightGCN_BPRTrainer_LGCNDataset_15.420.pth
Epoch 460/1500, Loss: 0.017353, Time: 82.356s
Test result. Precision: 5.580%@20, 2.402%@100, Recall: 18.139%@20, 37.960%@100, NDCG: 15.434%@20, 21.289%@100, Time: 4.046s
Save model to checkpoints\LightGCN_BPRTrainer_LGCNDataset_15.434.pth
Epoch 461/1500, Loss: 0.017232, Time: 82.543s
Test result. Precision: 5.580%@20, 2.402%@100, Recall: 18.144%@20, 37.959%@100, NDCG: 15.441%@20, 21.296%@100, Time: 4.015s
Save model to checkpoints\LightGCN_BPRTrainer_LGCNDataset_15.441.pth
Epoch 462/1500, Loss: 0.017157, Time: 82.590s
Test result. Precision: 5.577%@20, 2.400%@100, Recall: 18.158%@20, 37.922%@100, NDCG: 15.442%@20, 21.285%@100, Time: 4.077s
Save model to checkpoints\LightGCN_BPRTrainer_LGCNDataset_15.442.pth
Epoch 463/1500, Loss: 0.017273, Time: 83.090s
Test result. Precision: 5.578%@20, 2.400%@100, Recall: 18.158%@20, 37.941%@100, NDCG: 15.433%@20, 21.277%@100, Time: 4.030s
Save model to checkpoints\LightGCN_BPRTrainer_LGCNDataset_15.433.pth
Epoch 464/1500, Loss: 0.017374, Time: 82.559s
Test result. Precision: 5.573%@20, 2.400%@100, Recall: 18.137%@20, 37.916%@100, NDCG: 15.430%@20, 21.278%@100, Time: 3.983s
Save model to checkpoints\LightGCN_BPRTrainer_LGCNDataset_15.430.pth
Epoch 465/1500, Loss: 0.017263, Time: 82.652s
Test result. Precision: 5.579%@20, 2.400%@100, Recall: 18.178%@20, 37.926%@100, NDCG: 15.437%@20, 21.274%@100, Time: 4.077s
Save model to checkpoints\LightGCN_BPRTrainer_LGCNDataset_15.437.pth
Epoch 466/1500, Loss: 0.017168, Time: 82.602s
Test result. Precision: 5.575%@20, 2.399%@100, Recall: 18.159%@20, 37.920%@100, NDCG: 15.442%@20, 21.283%@100, Time: 4.077s
Save model to checkpoints\LightGCN_BPRTrainer_LGCNDataset_15.442.pth
Epoch 467/1500, Loss: 0.017199, Time: 82.887s
Test result. Precision: 5.576%@20, 2.399%@100, Recall: 18.172%@20, 37.920%@100, NDCG: 15.454%@20, 21.292%@100, Time: 4.077s
Save model to checkpoints\LightGCN_BPRTrainer_LGCNDataset_15.454.pth
Epoch 468/1500, Loss: 0.017266, Time: 82.449s
Test result. Precision: 5.583%@20, 2.401%@100, Recall: 18.211%@20, 37.948%@100, NDCG: 15.469%@20, 21.302%@100, Time: 4.062s
Save model to checkpoints\LightGCN_BPRTrainer_LGCNDataset_15.469.pth
Epoch 469/1500, Loss: 0.017413, Time: 83.215s
Test result. Precision: 5.579%@20, 2.401%@100, Recall: 18.194%@20, 37.954%@100, NDCG: 15.457%@20, 21.298%@100, Time: 4.030s
Save model to checkpoints\LightGCN_BPRTrainer_LGCNDataset_15.457.pth
Epoch 470/1500, Loss: 0.017190, Time: 82.496s
Test result. Precision: 5.583%@20, 2.402%@100, Recall: 18.202%@20, 37.968%@100, NDCG: 15.469%@20, 21.311%@100, Time: 4.249s
Save model to checkpoints\LightGCN_BPRTrainer_LGCNDataset_15.469.pth
Epoch 471/1500, Loss: 0.017316, Time: 82.309s
Test result. Precision: 5.584%@20, 2.401%@100, Recall: 18.193%@20, 37.967%@100, NDCG: 15.474%@20, 21.319%@100, Time: 3.952s
Save model to checkpoints\LightGCN_BPRTrainer_LGCNDataset_15.474.pth
Epoch 472/1500, Loss: 0.017220, Time: 82.387s
Test result. Precision: 5.583%@20, 2.401%@100, Recall: 18.188%@20, 37.960%@100, NDCG: 15.459%@20, 21.305%@100, Time: 3.999s
Save model to checkpoints\LightGCN_BPRTrainer_LGCNDataset_15.459.pth
Epoch 473/1500, Loss: 0.017076, Time: 82.387s
Test result. Precision: 5.587%@20, 2.401%@100, Recall: 18.200%@20, 37.966%@100, NDCG: 15.480%@20, 21.322%@100, Time: 4.202s
Save model to checkpoints\LightGCN_BPRTrainer_LGCNDataset_15.480.pth
Epoch 474/1500, Loss: 0.017126, Time: 82.590s
Test result. Precision: 5.589%@20, 2.400%@100, Recall: 18.207%@20, 37.945%@100, NDCG: 15.485%@20, 21.319%@100, Time: 4.015s
Save model to checkpoints\LightGCN_BPRTrainer_LGCNDataset_15.485.pth
Epoch 475/1500, Loss: 0.017262, Time: 82.590s
Test result. Precision: 5.587%@20, 2.402%@100, Recall: 18.198%@20, 37.960%@100, NDCG: 15.480%@20, 21.322%@100, Time: 3.983s
Save model to checkpoints\LightGCN_BPRTrainer_LGCNDataset_15.480.pth
Epoch 476/1500, Loss: 0.017390, Time: 82.449s
Test result. Precision: 5.594%@20, 2.402%@100, Recall: 18.203%@20, 37.970%@100, NDCG: 15.483%@20, 21.323%@100, Time: 4.046s
Save model to checkpoints\LightGCN_BPRTrainer_LGCNDataset_15.483.pth
Epoch 477/1500, Loss: 0.017223, Time: 82.418s
Test result. Precision: 5.587%@20, 2.401%@100, Recall: 18.181%@20, 37.959%@100, NDCG: 15.468%@20, 21.313%@100, Time: 3.999s
Save model to checkpoints\LightGCN_BPRTrainer_LGCNDataset_15.468.pth
Epoch 478/1500, Loss: 0.017418, Time: 82.381s
Test result. Precision: 5.588%@20, 2.400%@100, Recall: 18.191%@20, 37.927%@100, NDCG: 15.472%@20, 21.307%@100, Time: 4.030s
Save model to checkpoints\LightGCN_BPRTrainer_LGCNDataset_15.472.pth
Epoch 479/1500, Loss: 0.017249, Time: 82.652s
Test result. Precision: 5.584%@20, 2.400%@100, Recall: 18.173%@20, 37.926%@100, NDCG: 15.468%@20, 21.309%@100, Time: 4.171s
Save model to checkpoints\LightGCN_BPRTrainer_LGCNDataset_15.468.pth
Epoch 480/1500, Loss: 0.017394, Time: 82.981s
Test result. Precision: 5.589%@20, 2.401%@100, Recall: 18.199%@20, 37.943%@100, NDCG: 15.478%@20, 21.315%@100, Time: 3.952s
Save model to checkpoints\LightGCN_BPRTrainer_LGCNDataset_15.478.pth
Epoch 481/1500, Loss: 0.017403, Time: 82.715s
Test result. Precision: 5.580%@20, 2.403%@100, Recall: 18.165%@20, 37.985%@100, NDCG: 15.457%@20, 21.316%@100, Time: 3.983s
Save model to checkpoints\LightGCN_BPRTrainer_LGCNDataset_15.457.pth
Epoch 482/1500, Loss: 0.017035, Time: 82.371s
Test result. Precision: 5.583%@20, 2.404%@100, Recall: 18.178%@20, 37.985%@100, NDCG: 15.468%@20, 21.323%@100, Time: 3.999s
Save model to checkpoints\LightGCN_BPRTrainer_LGCNDataset_15.468.pth
Epoch 483/1500, Loss: 0.017112, Time: 82.215s
Test result. Precision: 5.590%@20, 2.401%@100, Recall: 18.219%@20, 37.951%@100, NDCG: 15.474%@20, 21.307%@100, Time: 3.968s
Save model to checkpoints\LightGCN_BPRTrainer_LGCNDataset_15.474.pth
Epoch 484/1500, Loss: 0.017109, Time: 82.684s
Test result. Precision: 5.592%@20, 2.402%@100, Recall: 18.232%@20, 37.954%@100, NDCG: 15.476%@20, 21.309%@100, Time: 4.202s
Save model to checkpoints\LightGCN_BPRTrainer_LGCNDataset_15.476.pth
Epoch 485/1500, Loss: 0.016816, Time: 82.199s
Test result. Precision: 5.593%@20, 2.403%@100, Recall: 18.231%@20, 37.972%@100, NDCG: 15.485%@20, 21.322%@100, Time: 3.937s
Save model to checkpoints\LightGCN_BPRTrainer_LGCNDataset_15.485.pth
Epoch 486/1500, Loss: 0.016967, Time: 82.340s
Test result. Precision: 5.600%@20, 2.404%@100, Recall: 18.243%@20, 37.955%@100, NDCG: 15.499%@20, 21.328%@100, Time: 4.171s
Save model to checkpoints\LightGCN_BPRTrainer_LGCNDataset_15.499.pth
Epoch 487/1500, Loss: 0.017404, Time: 83.060s
Test result. Precision: 5.603%@20, 2.404%@100, Recall: 18.249%@20, 37.978%@100, NDCG: 15.504%@20, 21.334%@100, Time: 4.015s
Save model to checkpoints\LightGCN_BPRTrainer_LGCNDataset_15.504.pth
Epoch 488/1500, Loss: 0.017420, Time: 82.434s
Test result. Precision: 5.604%@20, 2.404%@100, Recall: 18.246%@20, 37.989%@100, NDCG: 15.506%@20, 21.339%@100, Time: 4.015s
Save model to checkpoints\LightGCN_BPRTrainer_LGCNDataset_15.506.pth
Epoch 489/1500, Loss: 0.017093, Time: 82.996s
Test result. Precision: 5.600%@20, 2.405%@100, Recall: 18.221%@20, 37.997%@100, NDCG: 15.498%@20, 21.342%@100, Time: 3.952s
Save model to checkpoints\LightGCN_BPRTrainer_LGCNDataset_15.498.pth
Epoch 490/1500, Loss: 0.017114, Time: 82.434s
Test result. Precision: 5.599%@20, 2.405%@100, Recall: 18.222%@20, 37.998%@100, NDCG: 15.490%@20, 21.334%@100, Time: 3.999s
Save model to checkpoints\LightGCN_BPRTrainer_LGCNDataset_15.490.pth
Epoch 491/1500, Loss: 0.017288, Time: 82.496s
Test result. Precision: 5.595%@20, 2.406%@100, Recall: 18.215%@20, 37.994%@100, NDCG: 15.489%@20, 21.337%@100, Time: 3.983s
Save model to checkpoints\LightGCN_BPRTrainer_LGCNDataset_15.489.pth
Epoch 492/1500, Loss: 0.017281, Time: 82.371s
Test result. Precision: 5.597%@20, 2.405%@100, Recall: 18.215%@20, 37.996%@100, NDCG: 15.505%@20, 21.353%@100, Time: 4.233s
Save model to checkpoints\LightGCN_BPRTrainer_LGCNDataset_15.505.pth
Epoch 493/1500, Loss: 0.016776, Time: 82.699s
Test result. Precision: 5.600%@20, 2.405%@100, Recall: 18.220%@20, 37.991%@100, NDCG: 15.500%@20, 21.345%@100, Time: 3.999s
Save model to checkpoints\LightGCN_BPRTrainer_LGCNDataset_15.500.pth
Epoch 494/1500, Loss: 0.016886, Time: 82.262s
Test result. Precision: 5.590%@20, 2.404%@100, Recall: 18.198%@20, 37.976%@100, NDCG: 15.492%@20, 21.342%@100, Time: 3.968s
Save model to checkpoints\LightGCN_BPRTrainer_LGCNDataset_15.492.pth
Epoch 495/1500, Loss: 0.016875, Time: 83.340s
Test result. Precision: 5.586%@20, 2.405%@100, Recall: 18.180%@20, 37.987%@100, NDCG: 15.482%@20, 21.342%@100, Time: 4.062s
Save model to checkpoints\LightGCN_BPRTrainer_LGCNDataset_15.482.pth
Epoch 496/1500, Loss: 0.017129, Time: 82.668s
Test result. Precision: 5.587%@20, 2.404%@100, Recall: 18.193%@20, 37.969%@100, NDCG: 15.470%@20, 21.320%@100, Time: 3.968s
Save model to checkpoints\LightGCN_BPRTrainer_LGCNDataset_15.470.pth
Epoch 497/1500, Loss: 0.017187, Time: 82.434s
Test result. Precision: 5.598%@20, 2.405%@100, Recall: 18.218%@20, 37.961%@100, NDCG: 15.475%@20, 21.313%@100, Time: 4.077s
Save model to checkpoints\LightGCN_BPRTrainer_LGCNDataset_15.475.pth
Epoch 498/1500, Loss: 0.017069, Time: 83.208s
Test result. Precision: 5.596%@20, 2.404%@100, Recall: 18.204%@20, 37.967%@100, NDCG: 15.463%@20, 21.307%@100, Time: 4.093s
Save model to checkpoints\LightGCN_BPRTrainer_LGCNDataset_15.463.pth
Epoch 499/1500, Loss: 0.017070, Time: 82.465s
Test result. Precision: 5.596%@20, 2.405%@100, Recall: 18.217%@20, 37.969%@100, NDCG: 15.474%@20, 21.317%@100, Time: 3.983s
Save model to checkpoints\LightGCN_BPRTrainer_LGCNDataset_15.474.pth
Epoch 500/1500, Loss: 0.017253, Time: 82.543s
Test result. Precision: 5.596%@20, 2.404%@100, Recall: 18.226%@20, 37.952%@100, NDCG: 15.484%@20, 21.321%@100, Time: 4.030s
Save model to checkpoints\LightGCN_BPRTrainer_LGCNDataset_15.484.pth
Epoch 501/1500, Loss: 0.017024, Time: 82.574s
Test result. Precision: 5.598%@20, 2.404%@100, Recall: 18.217%@20, 37.955%@100, NDCG: 15.488%@20, 21.325%@100, Time: 4.015s
Save model to checkpoints\LightGCN_BPRTrainer_LGCNDataset_15.488.pth
Epoch 502/1500, Loss: 0.017476, Time: 83.043s
Test result. Precision: 5.593%@20, 2.406%@100, Recall: 18.185%@20, 37.987%@100, NDCG: 15.480%@20, 21.335%@100, Time: 4.093s
Save model to checkpoints\LightGCN_BPRTrainer_LGCNDataset_15.480.pth
Epoch 503/1500, Loss: 0.017142, Time: 82.356s
Test result. Precision: 5.601%@20, 2.404%@100, Recall: 18.218%@20, 37.974%@100, NDCG: 15.482%@20, 21.322%@100, Time: 3.983s
Save model to checkpoints\LightGCN_BPRTrainer_LGCNDataset_15.482.pth
Epoch 504/1500, Loss: 0.017043, Time: 82.246s
Test result. Precision: 5.597%@20, 2.404%@100, Recall: 18.208%@20, 37.971%@100, NDCG: 15.478%@20, 21.323%@100, Time: 3.999s
Save model to checkpoints\LightGCN_BPRTrainer_LGCNDataset_15.478.pth
Epoch 505/1500, Loss: 0.017390, Time: 83.184s
Test result. Precision: 5.597%@20, 2.404%@100, Recall: 18.223%@20, 37.967%@100, NDCG: 15.486%@20, 21.326%@100, Time: 4.015s
Save model to checkpoints\LightGCN_BPRTrainer_LGCNDataset_15.486.pth
Epoch 506/1500, Loss: 0.016779, Time: 82.356s
Test result. Precision: 5.595%@20, 2.404%@100, Recall: 18.228%@20, 37.976%@100, NDCG: 15.488%@20, 21.328%@100, Time: 4.108s
Save model to checkpoints\LightGCN_BPRTrainer_LGCNDataset_15.488.pth
Epoch 507/1500, Loss: 0.016895, Time: 82.403s
Test result. Precision: 5.594%@20, 2.403%@100, Recall: 18.229%@20, 37.977%@100, NDCG: 15.500%@20, 21.341%@100, Time: 4.046s
Save model to checkpoints\LightGCN_BPRTrainer_LGCNDataset_15.500.pth
Epoch 508/1500, Loss: 0.017069, Time: 82.408s
Test result. Precision: 5.592%@20, 2.402%@100, Recall: 18.218%@20, 37.963%@100, NDCG: 15.493%@20, 21.334%@100, Time: 4.015s
Save model to checkpoints\LightGCN_BPRTrainer_LGCNDataset_15.493.pth
Epoch 509/1500, Loss: 0.016949, Time: 83.027s
Test result. Precision: 5.597%@20, 2.403%@100, Recall: 18.230%@20, 37.965%@100, NDCG: 15.503%@20, 21.340%@100, Time: 4.030s
Save model to checkpoints\LightGCN_BPRTrainer_LGCNDataset_15.503.pth
Epoch 510/1500, Loss: 0.016884, Time: 82.856s
Test result. Precision: 5.594%@20, 2.402%@100, Recall: 18.220%@20, 37.958%@100, NDCG: 15.481%@20, 21.319%@100, Time: 4.046s
Save model to checkpoints\LightGCN_BPRTrainer_LGCNDataset_15.481.pth
Epoch 511/1500, Loss: 0.016910, Time: 82.434s
Test result. Precision: 5.589%@20, 2.402%@100, Recall: 18.207%@20, 37.963%@100, NDCG: 15.477%@20, 21.321%@100, Time: 4.108s
Save model to checkpoints\LightGCN_BPRTrainer_LGCNDataset_15.477.pth
Epoch 512/1500, Loss: 0.016816, Time: 82.246s
Test result. Precision: 5.595%@20, 2.404%@100, Recall: 18.200%@20, 37.971%@100, NDCG: 15.490%@20, 21.337%@100, Time: 3.999s
Save model to checkpoints\LightGCN_BPRTrainer_LGCNDataset_15.490.pth
Epoch 513/1500, Loss: 0.016891, Time: 82.684s
Test result. Precision: 5.587%@20, 2.402%@100, Recall: 18.174%@20, 37.948%@100, NDCG: 15.474%@20, 21.324%@100, Time: 3.983s
Save model to checkpoints\LightGCN_BPRTrainer_LGCNDataset_15.474.pth
Epoch 514/1500, Loss: 0.017055, Time: 82.668s
Test result. Precision: 5.592%@20, 2.401%@100, Recall: 18.210%@20, 37.942%@100, NDCG: 15.480%@20, 21.317%@100, Time: 4.015s
Save model to checkpoints\LightGCN_BPRTrainer_LGCNDataset_15.480.pth
Epoch 515/1500, Loss: 0.017103, Time: 82.783s
Test result. Precision: 5.601%@20, 2.404%@100, Recall: 18.210%@20, 37.992%@100, NDCG: 15.486%@20, 21.331%@100, Time: 4.108s
Save model to checkpoints\LightGCN_BPRTrainer_LGCNDataset_15.486.pth
Epoch 516/1500, Loss: 0.017017, Time: 82.824s
Test result. Precision: 5.601%@20, 2.404%@100, Recall: 18.204%@20, 37.972%@100, NDCG: 15.486%@20, 21.329%@100, Time: 3.968s
Save model to checkpoints\LightGCN_BPRTrainer_LGCNDataset_15.486.pth
Epoch 517/1500, Loss: 0.016886, Time: 82.356s
Test result. Precision: 5.605%@20, 2.404%@100, Recall: 18.210%@20, 38.005%@100, NDCG: 15.500%@20, 21.348%@100, Time: 3.968s
Save model to checkpoints\LightGCN_BPRTrainer_LGCNDataset_15.500.pth
Epoch 518/1500, Loss: 0.017131, Time: 82.434s
Test result. Precision: 5.597%@20, 2.403%@100, Recall: 18.212%@20, 37.992%@100, NDCG: 15.495%@20, 21.343%@100, Time: 4.030s
Save model to checkpoints\LightGCN_BPRTrainer_LGCNDataset_15.495.pth
Epoch 519/1500, Loss: 0.017014, Time: 82.668s
Test result. Precision: 5.596%@20, 2.403%@100, Recall: 18.196%@20, 37.965%@100, NDCG: 15.500%@20, 21.345%@100, Time: 4.030s
Save model to checkpoints\LightGCN_BPRTrainer_LGCNDataset_15.500.pth
Epoch 520/1500, Loss: 0.017143, Time: 83.215s
Test result. Precision: 5.602%@20, 2.405%@100, Recall: 18.215%@20, 37.996%@100, NDCG: 15.503%@20, 21.351%@100, Time: 3.983s
Save model to checkpoints\LightGCN_BPRTrainer_LGCNDataset_15.503.pth
Epoch 521/1500, Loss: 0.017175, Time: 82.403s
Test result. Precision: 5.607%@20, 2.406%@100, Recall: 18.240%@20, 37.993%@100, NDCG: 15.504%@20, 21.345%@100, Time: 3.968s
Save model to checkpoints\LightGCN_BPRTrainer_LGCNDataset_15.504.pth
Epoch 522/1500, Loss: 0.017018, Time: 82.465s
Test result. Precision: 5.608%@20, 2.407%@100, Recall: 18.250%@20, 38.000%@100, NDCG: 15.516%@20, 21.357%@100, Time: 3.968s
Save model to checkpoints\LightGCN_BPRTrainer_LGCNDataset_15.516.pth
Epoch 523/1500, Loss: 0.017086, Time: 82.762s
Test result. Precision: 5.612%@20, 2.407%@100, Recall: 18.262%@20, 37.982%@100, NDCG: 15.530%@20, 21.365%@100, Time: 4.030s
Save model to checkpoints\LightGCN_BPRTrainer_LGCNDataset_15.530.pth
Epoch 524/1500, Loss: 0.017200, Time: 82.293s
Test result. Precision: 5.611%@20, 2.405%@100, Recall: 18.262%@20, 37.962%@100, NDCG: 15.533%@20, 21.361%@100, Time: 3.952s
Save model to checkpoints\LightGCN_BPRTrainer_LGCNDataset_15.533.pth
Epoch 525/1500, Loss: 0.016841, Time: 82.496s
Test result. Precision: 5.616%@20, 2.404%@100, Recall: 18.274%@20, 37.931%@100, NDCG: 15.544%@20, 21.361%@100, Time: 3.983s
Save model to checkpoints\LightGCN_BPRTrainer_LGCNDataset_15.544.pth
Epoch 526/1500, Loss: 0.016913, Time: 82.309s
Test result. Precision: 5.615%@20, 2.405%@100, Recall: 18.253%@20, 37.962%@100, NDCG: 15.535%@20, 21.365%@100, Time: 4.140s
Save model to checkpoints\LightGCN_BPRTrainer_LGCNDataset_15.535.pth
Epoch 527/1500, Loss: 0.016789, Time: 82.387s
Test result. Precision: 5.616%@20, 2.406%@100, Recall: 18.279%@20, 37.965%@100, NDCG: 15.553%@20, 21.379%@100, Time: 3.983s
Save model to checkpoints\LightGCN_BPRTrainer_LGCNDataset_15.553.pth
Epoch 528/1500, Loss: 0.016904, Time: 82.422s
Test result. Precision: 5.620%@20, 2.408%@100, Recall: 18.282%@20, 38.015%@100, NDCG: 15.544%@20, 21.378%@100, Time: 3.999s
Save model to checkpoints\LightGCN_BPRTrainer_LGCNDataset_15.544.pth
Epoch 529/1500, Loss: 0.017006, Time: 82.856s
Test result. Precision: 5.624%@20, 2.408%@100, Recall: 18.308%@20, 37.997%@100, NDCG: 15.556%@20, 21.379%@100, Time: 3.999s
Save model to checkpoints\LightGCN_BPRTrainer_LGCNDataset_15.556.pth
Epoch 530/1500, Loss: 0.016919, Time: 82.356s
Test result. Precision: 5.624%@20, 2.407%@100, Recall: 18.304%@20, 38.011%@100, NDCG: 15.559%@20, 21.385%@100, Time: 3.999s
Save model to checkpoints\LightGCN_BPRTrainer_LGCNDataset_15.559.pth
Epoch 531/1500, Loss: 0.016893, Time: 82.231s
Test result. Precision: 5.624%@20, 2.408%@100, Recall: 18.294%@20, 38.010%@100, NDCG: 15.548%@20, 21.377%@100, Time: 4.249s
Save model to checkpoints\LightGCN_BPRTrainer_LGCNDataset_15.548.pth
Epoch 532/1500, Loss: 0.016817, Time: 82.231s
Test result. Precision: 5.616%@20, 2.408%@100, Recall: 18.268%@20, 37.997%@100, NDCG: 15.535%@20, 21.371%@100, Time: 3.952s
Save model to checkpoints\LightGCN_BPRTrainer_LGCNDataset_15.535.pth
Epoch 533/1500, Loss: 0.017021, Time: 82.777s
Test result. Precision: 5.618%@20, 2.407%@100, Recall: 18.267%@20, 37.993%@100, NDCG: 15.540%@20, 21.374%@100, Time: 3.999s
Save model to checkpoints\LightGCN_BPRTrainer_LGCNDataset_15.540.pth
Epoch 534/1500, Loss: 0.016859, Time: 82.481s
Test result. Precision: 5.618%@20, 2.408%@100, Recall: 18.262%@20, 37.984%@100, NDCG: 15.535%@20, 21.368%@100, Time: 4.140s
Save model to checkpoints\LightGCN_BPRTrainer_LGCNDataset_15.535.pth
Epoch 535/1500, Loss: 0.017038, Time: 82.340s
Test result. Precision: 5.617%@20, 2.407%@100, Recall: 18.256%@20, 37.979%@100, NDCG: 15.525%@20, 21.359%@100, Time: 4.077s
Save model to checkpoints\LightGCN_BPRTrainer_LGCNDataset_15.525.pth
Epoch 536/1500, Loss: 0.016888, Time: 82.465s
Test result. Precision: 5.628%@20, 2.408%@100, Recall: 18.269%@20, 37.992%@100, NDCG: 15.537%@20, 21.366%@100, Time: 4.265s
Save model to checkpoints\LightGCN_BPRTrainer_LGCNDataset_15.537.pth
Epoch 537/1500, Loss: 0.016986, Time: 82.590s
Test result. Precision: 5.624%@20, 2.409%@100, Recall: 18.278%@20, 38.012%@100, NDCG: 15.532%@20, 21.365%@100, Time: 4.062s
Save model to checkpoints\LightGCN_BPRTrainer_LGCNDataset_15.532.pth
Epoch 538/1500, Loss: 0.016904, Time: 82.418s
Test result. Precision: 5.623%@20, 2.408%@100, Recall: 18.269%@20, 38.001%@100, NDCG: 15.533%@20, 21.365%@100, Time: 4.171s
Save model to checkpoints\LightGCN_BPRTrainer_LGCNDataset_15.533.pth
Epoch 539/1500, Loss: 0.017119, Time: 82.824s
Test result. Precision: 5.624%@20, 2.407%@100, Recall: 18.269%@20, 38.000%@100, NDCG: 15.532%@20, 21.364%@100, Time: 4.077s
Save model to checkpoints\LightGCN_BPRTrainer_LGCNDataset_15.532.pth
Epoch 540/1500, Loss: 0.016655, Time: 82.559s
Test result. Precision: 5.623%@20, 2.407%@100, Recall: 18.298%@20, 38.002%@100, NDCG: 15.536%@20, 21.363%@100, Time: 4.030s
Save model to checkpoints\LightGCN_BPRTrainer_LGCNDataset_15.536.pth
Epoch 541/1500, Loss: 0.016760, Time: 82.246s
Test result. Precision: 5.628%@20, 2.410%@100, Recall: 18.301%@20, 38.051%@100, NDCG: 15.538%@20, 21.374%@100, Time: 4.030s
Save model to checkpoints\LightGCN_BPRTrainer_LGCNDataset_15.538.pth
Epoch 542/1500, Loss: 0.016804, Time: 83.184s
Test result. Precision: 5.627%@20, 2.411%@100, Recall: 18.317%@20, 38.060%@100, NDCG: 15.547%@20, 21.383%@100, Time: 4.233s
Save model to checkpoints\LightGCN_BPRTrainer_LGCNDataset_15.547.pth
Epoch 543/1500, Loss: 0.016974, Time: 82.403s
Test result. Precision: 5.638%@20, 2.410%@100, Recall: 18.344%@20, 38.049%@100, NDCG: 15.570%@20, 21.392%@100, Time: 4.015s
Save model to checkpoints\LightGCN_BPRTrainer_LGCNDataset_15.570.pth
Epoch 544/1500, Loss: 0.016983, Time: 82.324s
Test result. Precision: 5.631%@20, 2.411%@100, Recall: 18.319%@20, 38.053%@100, NDCG: 15.553%@20, 21.385%@100, Time: 4.062s
Save model to checkpoints\LightGCN_BPRTrainer_LGCNDataset_15.553.pth
Epoch 545/1500, Loss: 0.017072, Time: 83.152s
Test result. Precision: 5.628%@20, 2.410%@100, Recall: 18.317%@20, 38.049%@100, NDCG: 15.551%@20, 21.383%@100, Time: 4.077s
Save model to checkpoints\LightGCN_BPRTrainer_LGCNDataset_15.551.pth
Epoch 546/1500, Loss: 0.017071, Time: 82.496s
Test result. Precision: 5.627%@20, 2.411%@100, Recall: 18.313%@20, 38.075%@100, NDCG: 15.555%@20, 21.396%@100, Time: 4.030s
Save model to checkpoints\LightGCN_BPRTrainer_LGCNDataset_15.555.pth
Epoch 547/1500, Loss: 0.016701, Time: 83.043s
Test result. Precision: 5.628%@20, 2.409%@100, Recall: 18.305%@20, 38.045%@100, NDCG: 15.557%@20, 21.391%@100, Time: 4.030s
Save model to checkpoints\LightGCN_BPRTrainer_LGCNDataset_15.557.pth
Epoch 548/1500, Loss: 0.016893, Time: 82.715s
Test result. Precision: 5.633%@20, 2.410%@100, Recall: 18.314%@20, 38.030%@100, NDCG: 15.566%@20, 21.394%@100, Time: 4.015s
Save model to checkpoints\LightGCN_BPRTrainer_LGCNDataset_15.566.pth
Epoch 549/1500, Loss: 0.016914, Time: 82.638s
Test result. Precision: 5.630%@20, 2.411%@100, Recall: 18.296%@20, 38.037%@100, NDCG: 15.559%@20, 21.396%@100, Time: 3.983s
Save model to checkpoints\LightGCN_BPRTrainer_LGCNDataset_15.559.pth
Epoch 550/1500, Loss: 0.016927, Time: 82.449s
Test result. Precision: 5.628%@20, 2.410%@100, Recall: 18.303%@20, 38.047%@100, NDCG: 15.557%@20, 21.393%@100, Time: 4.124s
Save model to checkpoints\LightGCN_BPRTrainer_LGCNDataset_15.557.pth
Epoch 551/1500, Loss: 0.016735, Time: 82.324s
Test result. Precision: 5.630%@20, 2.410%@100, Recall: 18.304%@20, 38.049%@100, NDCG: 15.565%@20, 21.401%@100, Time: 4.077s
Save model to checkpoints\LightGCN_BPRTrainer_LGCNDataset_15.565.pth
Epoch 552/1500, Loss: 0.016823, Time: 82.262s
Test result. Precision: 5.631%@20, 2.410%@100, Recall: 18.322%@20, 38.067%@100, NDCG: 15.578%@20, 21.413%@100, Time: 4.124s
Save model to checkpoints\LightGCN_BPRTrainer_LGCNDataset_15.578.pth
Epoch 553/1500, Loss: 0.016751, Time: 83.078s
Test result. Precision: 5.631%@20, 2.409%@100, Recall: 18.331%@20, 38.076%@100, NDCG: 15.574%@20, 21.407%@100, Time: 4.124s
Save model to checkpoints\LightGCN_BPRTrainer_LGCNDataset_15.574.pth
Epoch 554/1500, Loss: 0.016918, Time: 82.496s
Test result. Precision: 5.632%@20, 2.411%@100, Recall: 18.329%@20, 38.093%@100, NDCG: 15.572%@20, 21.412%@100, Time: 4.249s
Save model to checkpoints\LightGCN_BPRTrainer_LGCNDataset_15.572.pth
Epoch 555/1500, Loss: 0.016811, Time: 82.621s
Test result. Precision: 5.630%@20, 2.410%@100, Recall: 18.325%@20, 38.070%@100, NDCG: 15.568%@20, 21.404%@100, Time: 3.999s
Save model to checkpoints\LightGCN_BPRTrainer_LGCNDataset_15.568.pth
Epoch 556/1500, Loss: 0.016831, Time: 82.606s
Test result. Precision: 5.627%@20, 2.410%@100, Recall: 18.321%@20, 38.074%@100, NDCG: 15.562%@20, 21.403%@100, Time: 4.030s
Save model to checkpoints\LightGCN_BPRTrainer_LGCNDataset_15.562.pth
Epoch 557/1500, Loss: 0.016776, Time: 82.324s
Test result. Precision: 5.629%@20, 2.411%@100, Recall: 18.342%@20, 38.075%@100, NDCG: 15.575%@20, 21.409%@100, Time: 3.999s
Save model to checkpoints\LightGCN_BPRTrainer_LGCNDataset_15.575.pth
Epoch 558/1500, Loss: 0.016662, Time: 83.059s
Test result. Precision: 5.621%@20, 2.410%@100, Recall: 18.324%@20, 38.077%@100, NDCG: 15.546%@20, 21.387%@100, Time: 4.015s
Save model to checkpoints\LightGCN_BPRTrainer_LGCNDataset_15.546.pth
Epoch 559/1500, Loss: 0.016918, Time: 82.449s
Test result. Precision: 5.624%@20, 2.412%@100, Recall: 18.332%@20, 38.106%@100, NDCG: 15.555%@20, 21.401%@100, Time: 4.218s
Save model to checkpoints\LightGCN_BPRTrainer_LGCNDataset_15.555.pth
Epoch 560/1500, Loss: 0.016702, Time: 82.699s
Test result. Precision: 5.629%@20, 2.413%@100, Recall: 18.339%@20, 38.125%@100, NDCG: 15.564%@20, 21.413%@100, Time: 4.124s
Save model to checkpoints\LightGCN_BPRTrainer_LGCNDataset_15.564.pth
Epoch 561/1500, Loss: 0.016819, Time: 82.324s
Test result. Precision: 5.630%@20, 2.414%@100, Recall: 18.347%@20, 38.126%@100, NDCG: 15.571%@20, 21.419%@100, Time: 3.999s
Save model to checkpoints\LightGCN_BPRTrainer_LGCNDataset_15.571.pth
Epoch 562/1500, Loss: 0.016659, Time: 82.528s
Test result. Precision: 5.626%@20, 2.414%@100, Recall: 18.328%@20, 38.137%@100, NDCG: 15.564%@20, 21.418%@100, Time: 4.218s
Save model to checkpoints\LightGCN_BPRTrainer_LGCNDataset_15.564.pth
Epoch 563/1500, Loss: 0.016907, Time: 82.309s
Test result. Precision: 5.617%@20, 2.412%@100, Recall: 18.313%@20, 38.097%@100, NDCG: 15.550%@20, 21.403%@100, Time: 3.968s
Save model to checkpoints\LightGCN_BPRTrainer_LGCNDataset_15.550.pth
Epoch 564/1500, Loss: 0.016819, Time: 82.543s
Test result. Precision: 5.620%@20, 2.410%@100, Recall: 18.299%@20, 38.055%@100, NDCG: 15.549%@20, 21.395%@100, Time: 4.062s
Save model to checkpoints\LightGCN_BPRTrainer_LGCNDataset_15.549.pth
Epoch 565/1500, Loss: 0.016576, Time: 82.934s
Test result. Precision: 5.625%@20, 2.412%@100, Recall: 18.336%@20, 38.071%@100, NDCG: 15.563%@20, 21.402%@100, Time: 4.062s
Save model to checkpoints\LightGCN_BPRTrainer_LGCNDataset_15.563.pth
Epoch 566/1500, Loss: 0.016715, Time: 82.371s
Test result. Precision: 5.628%@20, 2.414%@100, Recall: 18.330%@20, 38.112%@100, NDCG: 15.566%@20, 21.414%@100, Time: 4.108s
Save model to checkpoints\LightGCN_BPRTrainer_LGCNDataset_15.566.pth
Epoch 567/1500, Loss: 0.016765, Time: 82.900s
Test result. Precision: 5.628%@20, 2.415%@100, Recall: 18.324%@20, 38.138%@100, NDCG: 15.557%@20, 21.415%@100, Time: 4.030s
Save model to checkpoints\LightGCN_BPRTrainer_LGCNDataset_15.557.pth
Epoch 568/1500, Loss: 0.016917, Time: 82.684s
Test result. Precision: 5.632%@20, 2.417%@100, Recall: 18.350%@20, 38.159%@100, NDCG: 15.570%@20, 21.426%@100, Time: 3.983s
Save model to checkpoints\LightGCN_BPRTrainer_LGCNDataset_15.570.pth
Epoch 569/1500, Loss: 0.016767, Time: 82.934s
Test result. Precision: 5.634%@20, 2.416%@100, Recall: 18.346%@20, 38.138%@100, NDCG: 15.566%@20, 21.416%@100, Time: 4.046s
Save model to checkpoints\LightGCN_BPRTrainer_LGCNDataset_15.566.pth
Epoch 570/1500, Loss: 0.016739, Time: 82.533s
Test result. Precision: 5.638%@20, 2.416%@100, Recall: 18.354%@20, 38.140%@100, NDCG: 15.581%@20, 21.428%@100, Time: 4.358s
Save model to checkpoints\LightGCN_BPRTrainer_LGCNDataset_15.581.pth
Epoch 571/1500, Loss: 0.016783, Time: 82.324s
Test result. Precision: 5.636%@20, 2.418%@100, Recall: 18.337%@20, 38.163%@100, NDCG: 15.576%@20, 21.437%@100, Time: 4.124s
Save model to checkpoints\LightGCN_BPRTrainer_LGCNDataset_15.576.pth
Epoch 572/1500, Loss: 0.016866, Time: 82.278s
Test result. Precision: 5.634%@20, 2.418%@100, Recall: 18.348%@20, 38.182%@100, NDCG: 15.577%@20, 21.439%@100, Time: 4.202s
Save model to checkpoints\LightGCN_BPRTrainer_LGCNDataset_15.577.pth
Epoch 573/1500, Loss: 0.016465, Time: 82.262s
Test result. Precision: 5.636%@20, 2.417%@100, Recall: 18.343%@20, 38.161%@100, NDCG: 15.578%@20, 21.434%@100, Time: 4.155s
Save model to checkpoints\LightGCN_BPRTrainer_LGCNDataset_15.578.pth
Epoch 574/1500, Loss: 0.016817, Time: 82.231s
Test result. Precision: 5.638%@20, 2.416%@100, Recall: 18.379%@20, 38.128%@100, NDCG: 15.578%@20, 21.418%@100, Time: 4.108s
Save model to checkpoints\LightGCN_BPRTrainer_LGCNDataset_15.578.pth
Epoch 575/1500, Loss: 0.016590, Time: 82.262s
Test result. Precision: 5.633%@20, 2.416%@100, Recall: 18.347%@20, 38.111%@100, NDCG: 15.566%@20, 21.413%@100, Time: 4.077s
Save model to checkpoints\LightGCN_BPRTrainer_LGCNDataset_15.566.pth
Epoch 576/1500, Loss: 0.016652, Time: 82.324s
Test result. Precision: 5.635%@20, 2.416%@100, Recall: 18.364%@20, 38.127%@100, NDCG: 15.569%@20, 21.412%@100, Time: 3.983s
Save model to checkpoints\LightGCN_BPRTrainer_LGCNDataset_15.569.pth
Epoch 577/1500, Loss: 0.016622, Time: 82.512s
Test result. Precision: 5.630%@20, 2.417%@100, Recall: 18.344%@20, 38.156%@100, NDCG: 15.557%@20, 21.413%@100, Time: 4.171s
Save model to checkpoints\LightGCN_BPRTrainer_LGCNDataset_15.557.pth
Epoch 578/1500, Loss: 0.016933, Time: 83.203s
Test result. Precision: 5.635%@20, 2.417%@100, Recall: 18.347%@20, 38.121%@100, NDCG: 15.563%@20, 21.411%@100, Time: 4.046s
Save model to checkpoints\LightGCN_BPRTrainer_LGCNDataset_15.563.pth
Epoch 579/1500, Loss: 0.016883, Time: 82.590s
Test result. Precision: 5.637%@20, 2.420%@100, Recall: 18.349%@20, 38.176%@100, NDCG: 15.565%@20, 21.426%@100, Time: 3.952s
Save model to checkpoints\LightGCN_BPRTrainer_LGCNDataset_15.565.pth
Epoch 580/1500, Loss: 0.016831, Time: 82.309s
Test result. Precision: 5.636%@20, 2.418%@100, Recall: 18.348%@20, 38.140%@100, NDCG: 15.569%@20, 21.419%@100, Time: 4.062s
Save model to checkpoints\LightGCN_BPRTrainer_LGCNDataset_15.569.pth
Epoch 581/1500, Loss: 0.016812, Time: 82.668s
Test result. Precision: 5.636%@20, 2.418%@100, Recall: 18.336%@20, 38.160%@100, NDCG: 15.561%@20, 21.419%@100, Time: 3.983s
Save model to checkpoints\LightGCN_BPRTrainer_LGCNDataset_15.561.pth
Epoch 582/1500, Loss: 0.016854, Time: 82.699s
Test result. Precision: 5.632%@20, 2.415%@100, Recall: 18.337%@20, 38.107%@100, NDCG: 15.559%@20, 21.404%@100, Time: 4.046s
Save model to checkpoints\LightGCN_BPRTrainer_LGCNDataset_15.559.pth
Epoch 583/1500, Loss: 0.016555, Time: 82.606s
Test result. Precision: 5.631%@20, 2.414%@100, Recall: 18.327%@20, 38.127%@100, NDCG: 15.552%@20, 21.403%@100, Time: 3.952s
Save model to checkpoints\LightGCN_BPRTrainer_LGCNDataset_15.552.pth
Epoch 584/1500, Loss: 0.016646, Time: 82.715s
Test result. Precision: 5.629%@20, 2.415%@100, Recall: 18.319%@20, 38.139%@100, NDCG: 15.554%@20, 21.412%@100, Time: 4.030s
Save model to checkpoints\LightGCN_BPRTrainer_LGCNDataset_15.554.pth
Epoch 585/1500, Loss: 0.016722, Time: 82.184s
Test result. Precision: 5.638%@20, 2.417%@100, Recall: 18.342%@20, 38.170%@100, NDCG: 15.563%@20, 21.417%@100, Time: 4.015s
Save model to checkpoints\LightGCN_BPRTrainer_LGCNDataset_15.563.pth
Epoch 586/1500, Loss: 0.016727, Time: 82.199s
Test result. Precision: 5.634%@20, 2.416%@100, Recall: 18.350%@20, 38.171%@100, NDCG: 15.565%@20, 21.420%@100, Time: 4.015s
Save model to checkpoints\LightGCN_BPRTrainer_LGCNDataset_15.565.pth
Epoch 587/1500, Loss: 0.016650, Time: 82.684s
Test result. Precision: 5.631%@20, 2.417%@100, Recall: 18.326%@20, 38.185%@100, NDCG: 15.556%@20, 21.422%@100, Time: 3.983s
Save model to checkpoints\LightGCN_BPRTrainer_LGCNDataset_15.556.pth
Epoch 588/1500, Loss: 0.016766, Time: 82.293s
Test result. Precision: 5.637%@20, 2.417%@100, Recall: 18.359%@20, 38.162%@100, NDCG: 15.564%@20, 21.415%@100, Time: 3.983s
Save model to checkpoints\LightGCN_BPRTrainer_LGCNDataset_15.564.pth
Epoch 589/1500, Loss: 0.016541, Time: 82.262s
Test result. Precision: 5.637%@20, 2.418%@100, Recall: 18.349%@20, 38.167%@100, NDCG: 15.569%@20, 21.425%@100, Time: 4.015s
Save model to checkpoints\LightGCN_BPRTrainer_LGCNDataset_15.569.pth
Epoch 590/1500, Loss: 0.016669, Time: 82.184s
Test result. Precision: 5.637%@20, 2.418%@100, Recall: 18.360%@20, 38.194%@100, NDCG: 15.579%@20, 21.440%@100, Time: 3.999s
Save model to checkpoints\LightGCN_BPRTrainer_LGCNDataset_15.579.pth
Epoch 591/1500, Loss: 0.016940, Time: 82.490s
Test result. Precision: 5.637%@20, 2.418%@100, Recall: 18.358%@20, 38.174%@100, NDCG: 15.567%@20, 21.425%@100, Time: 4.030s
Save model to checkpoints\LightGCN_BPRTrainer_LGCNDataset_15.567.pth
Epoch 592/1500, Loss: 0.016874, Time: 82.512s
Test result. Precision: 5.633%@20, 2.419%@100, Recall: 18.338%@20, 38.200%@100, NDCG: 15.558%@20, 21.429%@100, Time: 3.999s
Save model to checkpoints\LightGCN_BPRTrainer_LGCNDataset_15.558.pth
Epoch 593/1500, Loss: 0.016764, Time: 82.559s
Test result. Precision: 5.637%@20, 2.419%@100, Recall: 18.335%@20, 38.189%@100, NDCG: 15.554%@20, 21.422%@100, Time: 4.077s
Save model to checkpoints\LightGCN_BPRTrainer_LGCNDataset_15.554.pth
Epoch 594/1500, Loss: 0.016817, Time: 82.403s
Test result. Precision: 5.634%@20, 2.420%@100, Recall: 18.339%@20, 38.198%@100, NDCG: 15.562%@20, 21.434%@100, Time: 3.999s
Save model to checkpoints\LightGCN_BPRTrainer_LGCNDataset_15.562.pth
Epoch 595/1500, Loss: 0.016774, Time: 83.047s
Test result. Precision: 5.636%@20, 2.421%@100, Recall: 18.351%@20, 38.201%@100, NDCG: 15.572%@20, 21.442%@100, Time: 4.280s
Save model to checkpoints\LightGCN_BPRTrainer_LGCNDataset_15.572.pth
Epoch 596/1500, Loss: 0.016708, Time: 82.449s
Test result. Precision: 5.632%@20, 2.420%@100, Recall: 18.344%@20, 38.205%@100, NDCG: 15.577%@20, 21.450%@100, Time: 3.999s
Save model to checkpoints\LightGCN_BPRTrainer_LGCNDataset_15.577.pth
Epoch 597/1500, Loss: 0.016547, Time: 82.340s
Test result. Precision: 5.631%@20, 2.419%@100, Recall: 18.348%@20, 38.172%@100, NDCG: 15.578%@20, 21.443%@100, Time: 4.249s
Save model to checkpoints\LightGCN_BPRTrainer_LGCNDataset_15.578.pth
Epoch 598/1500, Loss: 0.016773, Time: 83.127s
Test result. Precision: 5.633%@20, 2.419%@100, Recall: 18.344%@20, 38.181%@100, NDCG: 15.585%@20, 21.452%@100, Time: 4.276s
Save model to checkpoints\LightGCN_BPRTrainer_LGCNDataset_15.585.pth
Epoch 599/1500, Loss: 0.016643, Time: 83.156s
Test result. Precision: 5.638%@20, 2.418%@100, Recall: 18.361%@20, 38.165%@100, NDCG: 15.586%@20, 21.443%@100, Time: 4.060s
Save model to checkpoints\LightGCN_BPRTrainer_LGCNDataset_15.586.pth
Epoch 600/1500, Loss: 0.016381, Time: 82.796s
Test result. Precision: 5.642%@20, 2.419%@100, Recall: 18.362%@20, 38.179%@100, NDCG: 15.587%@20, 21.445%@100, Time: 4.192s
Save model to checkpoints\LightGCN_BPRTrainer_LGCNDataset_15.587.pth
Epoch 601/1500, Loss: 0.016824, Time: 82.707s
Test result. Precision: 5.642%@20, 2.420%@100, Recall: 18.356%@20, 38.198%@100, NDCG: 15.577%@20, 21.442%@100, Time: 4.259s
Save model to checkpoints\LightGCN_BPRTrainer_LGCNDataset_15.577.pth
Epoch 602/1500, Loss: 0.016657, Time: 82.783s
Test result. Precision: 5.636%@20, 2.420%@100, Recall: 18.333%@20, 38.204%@100, NDCG: 15.568%@20, 21.442%@100, Time: 4.073s
[truncated: 2,244,371 more chars]
