# Supplementary material for: Research on Recommendation Algorithm of Joint Light Graph Convolution Network and DropEdge
Source: Hindawi journal article supplement (doi:10.1155/2022/3843021), 2022-01-27
Supplement: f1 [file 3843021.f1.zip › 3843021.f1/run-yelp2018 (1).txt]

hao'le/home/qhc/anaconda3/envs/LightGCN/bin/python /home/qhc/下载/LightGCN-PyTorch-master/code/main.py
Cpp extension not loaded
>>SEED: 2020
loading [../data/yelp2018]
1237259 interactions for training
324147 interactions for testing
yelp2018 Sparsity : 0.0012958757851778647
yelp2018 is ready to go
===========config================
{'A_n_fold': 100,
 'A_split': False,
 'bigdata': False,
 'bpr_batch_size': 2048,
 'decay': 0.0001,
 'dropout': 0,
 'keep_prob': 0.6,
 'latent_dim_rec': 64,
 'lightGCN_n_layers': 3,
 'lr': 0.001,
 'multicore': 0,
 'pretrain': 0,
 'test_u_batch_size': 100}
cores for test: 4
comment: lgn
tensorboard: 1
LOAD: 0
Weight path: ./checkpoints
Test Topks: [20]
using bpr loss
===========end===================
use NORMAL distribution initilizer
loading adjacency matrix
successfully loaded...
don't split the matrix
lgn is already to go(dropout:0)
load and save to /home/qhc/下载/LightGCN-PyTorch-master/code/checkpoints/lgn-yelp2018-3-64.pth.tar
[TEST]
{'precision': array([0.00027788]), 'recall': array([0.00052693]), 'ndcg': array([0.00044859])}
EPOCH[1/1000] loss0.400-|Sample:14.24|
EPOCH[2/1000] loss0.162-|Sample:15.14|
EPOCH[3/1000] loss0.147-|Sample:15.11|
EPOCH[4/1000] loss0.138-|Sample:15.33|
EPOCH[5/1000] loss0.131-|Sample:15.01|
EPOCH[6/1000] loss0.123-|Sample:15.08|
EPOCH[7/1000] loss0.116-|Sample:14.76|
EPOCH[8/1000] loss0.111-|Sample:14.71|
EPOCH[9/1000] loss0.106-|Sample:15.33|
EPOCH[10/1000] loss0.103-|Sample:11.58|
[TEST]
{'precision': array([0.01831975]), 'recall': array([0.04046318]), 'ndcg': array([0.03234975])}
EPOCH[11/1000] loss0.100-|Sample:14.97|
EPOCH[12/1000] loss0.096-|Sample:14.94|
EPOCH[13/1000] loss0.094-|Sample:14.90|
EPOCH[14/1000] loss0.092-|Sample:15.07|
EPOCH[15/1000] loss0.090-|Sample:11.99|
EPOCH[16/1000] loss0.087-|Sample:15.08|
EPOCH[17/1000] loss0.085-|Sample:15.23|
EPOCH[18/1000] loss0.083-|Sample:14.92|
EPOCH[19/1000] loss0.081-|Sample:14.70|
EPOCH[20/1000] loss0.079-|Sample:15.27|
[TEST]
{'precision': array([0.02003284]), 'recall': array([0.04427794]), 'ndcg': array([0.0354098])}
EPOCH[21/1000] loss0.078-|Sample:15.13|
EPOCH[22/1000] loss0.076-|Sample:15.15|
EPOCH[23/1000] loss0.074-|Sample:15.22|
EPOCH[24/1000] loss0.073-|Sample:15.31|
EPOCH[25/1000] loss0.072-|Sample:12.28|
EPOCH[26/1000] loss0.070-|Sample:14.78|
EPOCH[27/1000] loss0.070-|Sample:15.26|
EPOCH[28/1000] loss0.068-|Sample:15.01|
EPOCH[29/1000] loss0.067-|Sample:14.92|
EPOCH[30/1000] loss0.066-|Sample:15.16|
[TEST]
{'precision': array([0.02103069]), 'recall': array([0.04666114]), 'ndcg': array([0.03762104])}
EPOCH[31/1000] loss0.065-|Sample:15.07|
EPOCH[32/1000] loss0.064-|Sample:15.06|
EPOCH[33/1000] loss0.063-|Sample:15.02|
EPOCH[34/1000] loss0.062-|Sample:14.78|
EPOCH[35/1000] loss0.061-|Sample:13.50|
EPOCH[36/1000] loss0.060-|Sample:15.11|
EPOCH[37/1000] loss0.059-|Sample:15.08|
EPOCH[38/1000] loss0.059-|Sample:14.77|
EPOCH[39/1000] loss0.057-|Sample:15.27|
EPOCH[40/1000] loss0.057-|Sample:15.07|
[TEST]
{'precision': array([0.02204749]), 'recall': array([0.04908875]), 'ndcg': array([0.03945934])}
EPOCH[41/1000] loss0.056-|Sample:15.18|
EPOCH[42/1000] loss0.055-|Sample:15.18|
EPOCH[43/1000] loss0.054-|Sample:15.22|
EPOCH[44/1000] loss0.054-|Sample:15.16|
EPOCH[45/1000] loss0.053-|Sample:15.13|
EPOCH[46/1000] loss0.053-|Sample:14.91|
EPOCH[47/1000] loss0.052-|Sample:15.04|
EPOCH[48/1000] loss0.051-|Sample:14.97|
EPOCH[49/1000] loss0.051-|Sample:15.10|
EPOCH[50/1000] loss0.050-|Sample:14.77|
[TEST]
{'precision': array([0.02277378]), 'recall': array([0.05098568]), 'ndcg': array([0.04095004])}
EPOCH[51/1000] loss0.050-|Sample:15.10|
EPOCH[52/1000] loss0.049-|Sample:15.24|
EPOCH[53/1000] loss0.049-|Sample:15.12|
EPOCH[54/1000] loss0.048-|Sample:15.35|
EPOCH[55/1000] loss0.048-|Sample:14.76|
EPOCH[56/1000] loss0.046-|Sample:15.13|
EPOCH[57/1000] loss0.046-|Sample:15.24|
EPOCH[58/1000] loss0.046-|Sample:14.85|
EPOCH[59/1000] loss0.045-|Sample:15.08|
EPOCH[60/1000] loss0.045-|Sample:15.07|
[TEST]
{'precision': array([0.02360269]), 'recall': array([0.05270638]), 'ndcg': array([0.04243326])}
EPOCH[61/1000] loss0.044-|Sample:15.20|
EPOCH[62/1000] loss0.044-|Sample:15.15|
EPOCH[63/1000] loss0.043-|Sample:15.16|
EPOCH[64/1000] loss0.043-|Sample:15.23|
EPOCH[65/1000] loss0.043-|Sample:15.20|
EPOCH[66/1000] loss0.042-|Sample:15.19|
EPOCH[67/1000] loss0.042-|Sample:14.70|
EPOCH[68/1000] loss0.041-|Sample:15.32|
EPOCH[69/1000] loss0.041-|Sample:14.82|
EPOCH[70/1000] loss0.041-|Sample:15.22|
[TEST]
{'precision': array([0.02412372]), 'recall': array([0.05412213]), 'ndcg': array([0.04354794])}
EPOCH[71/1000] loss0.040-|Sample:15.24|
EPOCH[72/1000] loss0.040-|Sample:15.03|
EPOCH[73/1000] loss0.040-|Sample:15.02|
EPOCH[74/1000] loss0.039-|Sample:14.96|
EPOCH[75/1000] loss0.039-|Sample:14.93|
EPOCH[76/1000] loss0.039-|Sample:14.97|
EPOCH[77/1000] loss0.039-|Sample:15.20|
EPOCH[78/1000] loss0.038-|Sample:14.77|
EPOCH[79/1000] loss0.038-|Sample:15.12|
EPOCH[80/1000] loss0.037-|Sample:14.83|
[TEST]
{'precision': array([0.0247679]), 'recall': array([0.05579427]), 'ndcg': array([0.04494788])}
EPOCH[81/1000] loss0.037-|Sample:14.91|
EPOCH[82/1000] loss0.036-|Sample:15.05|
EPOCH[83/1000] loss0.037-|Sample:14.96|
EPOCH[84/1000] loss0.036-|Sample:14.82|
EPOCH[85/1000] loss0.036-|Sample:15.05|
EPOCH[86/1000] loss0.036-|Sample:14.55|
EPOCH[87/1000] loss0.036-|Sample:15.19|
EPOCH[88/1000] loss0.035-|Sample:14.74|
EPOCH[89/1000] loss0.035-|Sample:14.84|
EPOCH[90/1000] loss0.035-|Sample:14.90|
[TEST]
{'precision': array([0.025]), 'recall': array([0.0561357]), 'ndcg': array([0.04548509])}
EPOCH[91/1000] loss0.035-|Sample:15.03|
EPOCH[92/1000] loss0.034-|Sample:15.00|
EPOCH[93/1000] loss0.034-|Sample:14.97|
EPOCH[94/1000] loss0.034-|Sample:14.94|
EPOCH[95/1000] loss0.034-|Sample:15.00|
EPOCH[96/1000] loss0.033-|Sample:11.68|
EPOCH[97/1000] loss0.033-|Sample:14.70|
EPOCH[98/1000] loss0.033-|Sample:15.10|
EPOCH[99/1000] loss0.033-|Sample:14.99|
EPOCH[100/1000] loss0.032-|Sample:14.94|
[TEST]
{'precision': array([0.02528578]), 'recall': array([0.05680553]), 'ndcg': array([0.04618179])}
EPOCH[101/1000] loss0.032-|Sample:11.60|
EPOCH[102/1000] loss0.032-|Sample:15.08|
EPOCH[103/1000] loss0.032-|Sample:14.94|
EPOCH[104/1000] loss0.032-|Sample:14.98|
EPOCH[105/1000] loss0.031-|Sample:15.06|
EPOCH[106/1000] loss0.031-|Sample:15.10|
EPOCH[107/1000] loss0.031-|Sample:15.04|
EPOCH[108/1000] loss0.031-|Sample:15.08|
EPOCH[109/1000] loss0.030-|Sample:14.87|
EPOCH[110/1000] loss0.030-|Sample:15.05|
[TEST]
{'precision': array([0.02579102]), 'recall': array([0.05803521]), 'ndcg': array([0.04709362])}
EPOCH[111/1000] loss0.030-|Sample:14.60|
EPOCH[112/1000] loss0.030-|Sample:15.15|
EPOCH[113/1000] loss0.030-|Sample:15.06|
EPOCH[114/1000] loss0.030-|Sample:14.89|
EPOCH[115/1000] loss0.029-|Sample:15.02|
EPOCH[116/1000] loss0.030-|Sample:14.95|
EPOCH[117/1000] loss0.030-|Sample:14.69|
EPOCH[118/1000] loss0.029-|Sample:14.82|
EPOCH[119/1000] loss0.029-|Sample:14.87|
EPOCH[120/1000] loss0.029-|Sample:14.99|
[TEST]
{'precision': array([0.0260468]), 'recall': array([0.05850366]), 'ndcg': array([0.04753808])}
EPOCH[121/1000] loss0.029-|Sample:15.03|
EPOCH[122/1000] loss0.028-|Sample:15.17|
EPOCH[123/1000] loss0.028-|Sample:15.28|
EPOCH[124/1000] loss0.028-|Sample:14.85|
EPOCH[125/1000] loss0.028-|Sample:15.11|
EPOCH[126/1000] loss0.028-|Sample:15.06|
EPOCH[127/1000] loss0.028-|Sample:15.09|
EPOCH[128/1000] loss0.028-|Sample:15.05|
EPOCH[129/1000] loss0.028-|Sample:14.94|
EPOCH[130/1000] loss0.028-|Sample:15.19|
[TEST]
{'precision': array([0.02623784]), 'recall': array([0.05895938]), 'ndcg': array([0.04782752])}
EPOCH[131/1000] loss0.028-|Sample:14.95|
EPOCH[132/1000] loss0.027-|Sample:14.92|
EPOCH[133/1000] loss0.027-|Sample:15.14|
EPOCH[134/1000] loss0.027-|Sample:14.89|
EPOCH[135/1000] loss0.027-|Sample:15.45|
EPOCH[136/1000] loss0.027-|Sample:13.37|
EPOCH[137/1000] loss0.027-|Sample:14.80|
EPOCH[138/1000] loss0.027-|Sample:14.83|
EPOCH[139/1000] loss0.027-|Sample:15.21|
EPOCH[140/1000] loss0.027-|Sample:15.05|
[TEST]
{'precision': array([0.02660256]), 'recall': array([0.05951793]), 'ndcg': array([0.04861348])}
EPOCH[141/1000] loss0.026-|Sample:15.14|
EPOCH[142/1000] loss0.026-|Sample:15.09|
EPOCH[143/1000] loss0.026-|Sample:14.71|
EPOCH[144/1000] loss0.026-|Sample:15.06|
EPOCH[145/1000] loss0.026-|Sample:15.15|
EPOCH[146/1000] loss0.026-|Sample:13.97|
EPOCH[147/1000] loss0.026-|Sample:14.79|
EPOCH[148/1000] loss0.026-|Sample:15.08|
EPOCH[149/1000] loss0.025-|Sample:14.68|
EPOCH[150/1000] loss0.026-|Sample:15.15|
[TEST]
{'precision': array([0.02657572]), 'recall': array([0.05966585]), 'ndcg': array([0.04865011])}
EPOCH[151/1000] loss0.025-|Sample:15.13|
EPOCH[152/1000] loss0.025-|Sample:14.94|
EPOCH[153/1000] loss0.025-|Sample:15.40|
EPOCH[154/1000] loss0.025-|Sample:14.92|
EPOCH[155/1000] loss0.025-|Sample:14.87|
EPOCH[156/1000] loss0.025-|Sample:14.76|
EPOCH[157/1000] loss0.025-|Sample:15.05|
EPOCH[158/1000] loss0.024-|Sample:15.08|
EPOCH[159/1000] loss0.025-|Sample:14.92|
EPOCH[160/1000] loss0.025-|Sample:15.17|
[TEST]
{'precision': array([0.02669572]), 'recall': array([0.05976841]), 'ndcg': array([0.04879678])}
EPOCH[161/1000] loss0.024-|Sample:14.93|
EPOCH[162/1000] loss0.024-|Sample:14.92|
EPOCH[163/1000] loss0.024-|Sample:15.37|
EPOCH[164/1000] loss0.025-|Sample:14.84|
EPOCH[165/1000] loss0.024-|Sample:15.19|
EPOCH[166/1000] loss0.024-|Sample:14.88|
EPOCH[167/1000] loss0.024-|Sample:14.90|
EPOCH[168/1000] loss0.024-|Sample:14.99|
EPOCH[169/1000] loss0.024-|Sample:15.05|
EPOCH[170/1000] loss0.024-|Sample:15.22|
[TEST]
{'precision': array([0.02699571]), 'recall': array([0.06065988]), 'ndcg': array([0.0492067])}
EPOCH[171/1000] loss0.024-|Sample:14.65|
EPOCH[172/1000] loss0.024-|Sample:15.35|
EPOCH[173/1000] loss0.023-|Sample:14.99|
EPOCH[174/1000] loss0.023-|Sample:13.70|
EPOCH[175/1000] loss0.023-|Sample:15.32|
EPOCH[176/1000] loss0.023-|Sample:14.68|
EPOCH[177/1000] loss0.024-|Sample:14.75|
EPOCH[178/1000] loss0.023-|Sample:11.59|
EPOCH[179/1000] loss0.023-|Sample:15.19|
EPOCH[180/1000] loss0.023-|Sample:14.85|
[TEST]
{'precision': array([0.02695465]), 'recall': array([0.06022592]), 'ndcg': array([0.04931451])}
EPOCH[181/1000] loss0.023-|Sample:15.19|
EPOCH[182/1000] loss0.023-|Sample:15.13|
EPOCH[183/1000] loss0.023-|Sample:11.21|
EPOCH[184/1000] loss0.023-|Sample:14.96|
EPOCH[185/1000] loss0.023-|Sample:14.95|
EPOCH[186/1000] loss0.023-|Sample:14.97|
EPOCH[187/1000] loss0.023-|Sample:15.12|
EPOCH[188/1000] loss0.023-|Sample:14.88|
EPOCH[189/1000] loss0.023-|Sample:14.93|
EPOCH[190/1000] loss0.023-|Sample:11.50|
[TEST]
{'precision': array([0.02696571]), 'recall': array([0.06035112]), 'ndcg': array([0.04935711])}
EPOCH[191/1000] loss0.022-|Sample:15.01|
EPOCH[192/1000] loss0.022-|Sample:14.95|
EPOCH[193/1000] loss0.022-|Sample:14.69|
EPOCH[194/1000] loss0.022-|Sample:15.07|
EPOCH[195/1000] loss0.022-|Sample:15.07|
EPOCH[196/1000] loss0.022-|Sample:15.12|
EPOCH[197/1000] loss0.023-|Sample:14.98|
EPOCH[198/1000] loss0.022-|Sample:15.31|
EPOCH[199/1000] loss0.022-|Sample:15.19|
EPOCH[200/1000] loss0.022-|Sample:14.81|
[TEST]
{'precision': array([0.02713149]), 'recall': array([0.06082669]), 'ndcg': array([0.04978468])}
EPOCH[201/1000] loss0.022-|Sample:13.14|
EPOCH[202/1000] loss0.022-|Sample:15.18|
EPOCH[203/1000] loss0.022-|Sample:12.53|
EPOCH[204/1000] loss0.022-|Sample:14.90|
EPOCH[205/1000] loss0.022-|Sample:15.20|
EPOCH[206/1000] loss0.022-|Sample:15.18|
EPOCH[207/1000] loss0.022-|Sample:14.79|
EPOCH[208/1000] loss0.022-|Sample:15.12|
EPOCH[209/1000] loss0.022-|Sample:14.89|
EPOCH[210/1000] loss0.022-|Sample:14.02|
[TEST]
{'precision': array([0.02720254]), 'recall': array([0.06099995]), 'ndcg': array([0.04982902])}
EPOCH[211/1000] loss0.022-|Sample:14.98|
EPOCH[212/1000] loss0.022-|Sample:15.11|
EPOCH[213/1000] loss0.022-|Sample:15.27|
EPOCH[214/1000] loss0.022-|Sample:13.84|
EPOCH[215/1000] loss0.021-|Sample:11.41|
EPOCH[216/1000] loss0.021-|Sample:15.06|
EPOCH[217/1000] loss0.021-|Sample:14.88|
EPOCH[218/1000] loss0.022-|Sample:14.77|
EPOCH[219/1000] loss0.021-|Sample:14.77|
EPOCH[220/1000] loss0.021-|Sample:14.73|
[TEST]
{'precision': array([0.02723727]), 'recall': array([0.06075219]), 'ndcg': array([0.04974135])}
EPOCH[221/1000] loss0.021-|Sample:14.91|
EPOCH[222/1000] loss0.021-|Sample:15.07|
EPOCH[223/1000] loss0.021-|Sample:14.83|
EPOCH[224/1000] loss0.021-|Sample:14.76|
EPOCH[225/1000] loss0.021-|Sample:15.32|
EPOCH[226/1000] loss0.021-|Sample:14.84|
EPOCH[227/1000] loss0.021-|Sample:14.95|
EPOCH[228/1000] loss0.021-|Sample:14.96|
EPOCH[229/1000] loss0.021-|Sample:14.81|
EPOCH[230/1000] loss0.021-|Sample:15.15|
[TEST]
{'precision': array([0.02729569]), 'recall': array([0.06102426]), 'ndcg': array([0.0498538])}
EPOCH[231/1000] loss0.021-|Sample:15.09|
EPOCH[232/1000] loss0.021-|Sample:14.99|
EPOCH[233/1000] loss0.021-|Sample:15.14|
EPOCH[234/1000] loss0.021-|Sample:14.74|
EPOCH[235/1000] loss0.021-|Sample:15.22|
EPOCH[236/1000] loss0.021-|Sample:14.84|
EPOCH[237/1000] loss0.021-|Sample:15.00|
EPOCH[238/1000] loss0.021-|Sample:13.13|
EPOCH[239/1000] loss0.021-|Sample:13.82|
EPOCH[240/1000] loss0.021-|Sample:15.02|
[TEST]
{'precision': array([0.02739832]), 'recall': array([0.06129564]), 'ndcg': array([0.0500414])}
EPOCH[241/1000] loss0.021-|Sample:14.96|
EPOCH[242/1000] loss0.021-|Sample:15.40|
EPOCH[243/1000] loss0.021-|Sample:14.26|
EPOCH[244/1000] loss0.021-|Sample:15.15|
EPOCH[245/1000] loss0.021-|Sample:14.85|
EPOCH[246/1000] loss0.020-|Sample:15.07|
EPOCH[247/1000] loss0.020-|Sample:14.69|
EPOCH[248/1000] loss0.020-|Sample:15.12|
EPOCH[249/1000] loss0.020-|Sample:15.13|
EPOCH[250/1000] loss0.020-|Sample:12.71|
[TEST]
{'precision': array([0.02745832]), 'recall': array([0.06123356]), 'ndcg': array([0.05012638])}
EPOCH[251/1000] loss0.020-|Sample:14.83|
EPOCH[252/1000] loss0.020-|Sample:15.24|
EPOCH[253/1000] loss0.020-|Sample:15.03|
EPOCH[254/1000] loss0.020-|Sample:13.08|
EPOCH[255/1000] loss0.020-|Sample:15.04|
EPOCH[256/1000] loss0.020-|Sample:14.87|
EPOCH[257/1000] loss0.020-|Sample:15.34|
EPOCH[258/1000] loss0.020-|Sample:15.22|
EPOCH[259/1000] loss0.020-|Sample:15.13|
EPOCH[260/1000] loss0.020-|Sample:14.85|
[TEST]
{'precision': array([0.0275941]), 'recall': array([0.0613399]), 'ndcg': array([0.05025615])}
EPOCH[261/1000] loss0.020-|Sample:15.29|
EPOCH[262/1000] loss0.020-|Sample:15.25|
EPOCH[263/1000] loss0.020-|Sample:14.69|
EPOCH[264/1000] loss0.020-|Sample:15.03|
EPOCH[265/1000] loss0.020-|Sample:12.02|
EPOCH[266/1000] loss0.020-|Sample:14.57|
EPOCH[267/1000] loss0.020-|Sample:13.74|
EPOCH[268/1000] loss0.020-|Sample:14.71|
EPOCH[269/1000] loss0.020-|Sample:14.85|
EPOCH[270/1000] loss0.020-|Sample:15.06|
[TEST]
{'precision': array([0.02740148]), 'recall': array([0.06105321]), 'ndcg': array([0.05005773])}
EPOCH[271/1000] loss0.020-|Sample:11.52|
EPOCH[272/1000] loss0.020-|Sample:14.98|
EPOCH[273/1000] loss0.020-|Sample:15.02|
EPOCH[274/1000] loss0.020-|Sample:15.06|
EPOCH[275/1000] loss0.020-|Sample:15.23|
EPOCH[276/1000] loss0.020-|Sample:15.11|
EPOCH[277/1000] loss0.020-|Sample:15.05|
EPOCH[278/1000] loss0.020-|Sample:13.32|
EPOCH[279/1000] loss0.020-|Sample:14.98|
EPOCH[280/1000] loss0.020-|Sample:15.22|
[TEST]
{'precision': array([0.02755779]), 'recall': array([0.06152267]), 'ndcg': array([0.05034207])}
EPOCH[281/1000] loss0.020-|Sample:15.01|
EPOCH[282/1000] loss0.020-|Sample:11.76|
EPOCH[283/1000] loss0.020-|Sample:15.17|
EPOCH[284/1000] loss0.020-|Sample:11.79|
EPOCH[285/1000] loss0.020-|Sample:14.62|
EPOCH[286/1000] loss0.020-|Sample:15.14|
EPOCH[287/1000] loss0.020-|Sample:14.92|
EPOCH[288/1000] loss0.020-|Sample:14.75|
EPOCH[289/1000] loss0.019-|Sample:14.77|
EPOCH[290/1000] loss0.020-|Sample:14.89|
[TEST]
{'precision': array([0.02770147]), 'recall': array([0.06164336]), 'ndcg': array([0.0506764])}
EPOCH[291/1000] loss0.019-|Sample:15.07|
EPOCH[292/1000] loss0.020-|Sample:14.89|
EPOCH[293/1000] loss0.020-|Sample:15.24|
EPOCH[294/1000] loss0.019-|Sample:15.06|
EPOCH[295/1000] loss0.020-|Sample:14.69|
EPOCH[296/1000] loss0.019-|Sample:14.98|
EPOCH[297/1000] loss0.019-|Sample:15.10|
EPOCH[298/1000] loss0.019-|Sample:15.01|
EPOCH[299/1000] loss0.020-|Sample:15.08|
EPOCH[300/1000] loss0.019-|Sample:14.89|
[TEST]
{'precision': array([0.02767936]), 'recall': array([0.06155628]), 'ndcg': array([0.05067769])}
EPOCH[301/1000] loss0.019-|Sample:15.15|
EPOCH[302/1000] loss0.020-|Sample:14.65|
EPOCH[303/1000] loss0.019-|Sample:14.97|
EPOCH[304/1000] loss0.019-|Sample:14.80|
EPOCH[305/1000] loss0.019-|Sample:14.91|
EPOCH[306/1000] loss0.019-|Sample:14.86|
EPOCH[307/1000] loss0.019-|Sample:11.37|
EPOCH[308/1000] loss0.019-|Sample:15.09|
EPOCH[309/1000] loss0.019-|Sample:15.07|
EPOCH[310/1000] loss0.019-|Sample:14.95|
[TEST]
{'precision': array([0.02779304]), 'recall': array([0.06191695]), 'ndcg': array([0.05078359])}
EPOCH[311/1000] loss0.019-|Sample:15.14|
EPOCH[312/1000] loss0.019-|Sample:14.99|
EPOCH[313/1000] loss0.019-|Sample:14.81|
EPOCH[314/1000] loss0.019-|Sample:15.00|
EPOCH[315/1000] loss0.019-|Sample:15.01|
EPOCH[316/1000] loss0.019-|Sample:14.79|
EPOCH[317/1000] loss0.019-|Sample:14.82|
EPOCH[318/1000] loss0.019-|Sample:15.05|
EPOCH[319/1000] loss0.019-|Sample:13.31|
EPOCH[320/1000] loss0.019-|Sample:15.35|
[TEST]
{'precision': array([0.02782935]), 'recall': array([0.06183278]), 'ndcg': array([0.05084242])}
EPOCH[321/1000] loss0.019-|Sample:14.68|
EPOCH[322/1000] loss0.019-|Sample:14.92|
EPOCH[323/1000] loss0.019-|Sample:11.66|
EPOCH[324/1000] loss0.019-|Sample:14.98|
EPOCH[325/1000] loss0.019-|Sample:14.66|
EPOCH[326/1000] loss0.019-|Sample:14.97|
EPOCH[327/1000] loss0.019-|Sample:14.90|
EPOCH[328/1000] loss0.019-|Sample:14.85|
EPOCH[329/1000] loss0.019-|Sample:14.89|
EPOCH[330/1000] loss0.019-|Sample:11.44|
[TEST]
{'precision': array([0.02772673]), 'recall': array([0.06173997]), 'ndcg': array([0.05085101])}
EPOCH[331/1000] loss0.019-|Sample:14.75|
EPOCH[332/1000] loss0.019-|Sample:14.94|
EPOCH[333/1000] loss0.019-|Sample:15.09|
EPOCH[334/1000] loss0.019-|Sample:13.96|
EPOCH[335/1000] loss0.019-|Sample:14.89|
EPOCH[336/1000] loss0.019-|Sample:14.78|
EPOCH[337/1000] loss0.019-|Sample:15.09|
EPOCH[338/1000] loss0.019-|Sample:14.96|
EPOCH[339/1000] loss0.019-|Sample:14.96|
EPOCH[340/1000] loss0.019-|Sample:14.88|
[TEST]
{'precision': array([0.02765094]), 'recall': array([0.06160467]), 'ndcg': array([0.05064983])}
EPOCH[341/1000] loss0.019-|Sample:15.23|
EPOCH[342/1000] loss0.019-|Sample:15.03|
EPOCH[343/1000] loss0.019-|Sample:14.94|
EPOCH[344/1000] loss0.019-|Sample:15.42|
EPOCH[345/1000] loss0.019-|Sample:14.95|
EPOCH[346/1000] loss0.019-|Sample:15.15|
EPOCH[347/1000] loss0.019-|Sample:15.00|
EPOCH[348/1000] loss0.019-|Sample:14.91|
EPOCH[349/1000] loss0.019-|Sample:15.31|
EPOCH[350/1000] loss0.019-|Sample:14.86|
[TEST]
{'precision': array([0.02774252]), 'recall': array([0.06171805]), 'ndcg': array([0.05093614])}
EPOCH[351/1000] loss0.019-|Sample:14.92|
EPOCH[352/1000] loss0.019-|Sample:14.95|
EPOCH[353/1000] loss0.019-|Sample:14.88|
EPOCH[354/1000] loss0.019-|Sample:15.07|
EPOCH[355/1000] loss0.019-|Sample:14.93|
EPOCH[356/1000] loss0.019-|Sample:15.04|
EPOCH[357/1000] loss0.019-|Sample:14.95|
EPOCH[358/1000] loss0.019-|Sample:14.85|
EPOCH[359/1000] loss0.019-|Sample:14.99|
EPOCH[360/1000] loss0.019-|Sample:15.29|
[TEST]
{'precision': array([0.02784356]), 'recall': array([0.06182202]), 'ndcg': array([0.05088928])}
EPOCH[361/1000] loss0.019-|Sample:15.10|
EPOCH[362/1000] loss0.019-|Sample:13.27|
EPOCH[363/1000] loss0.019-|Sample:15.17|
EPOCH[364/1000] loss0.019-|Sample:14.74|
EPOCH[365/1000] loss0.019-|Sample:15.01|
EPOCH[366/1000] loss0.019-|Sample:15.19|
EPOCH[367/1000] loss0.018-|Sample:14.94|
EPOCH[368/1000] loss0.019-|Sample:15.04|
EPOCH[369/1000] loss0.019-|Sample:14.68|
EPOCH[370/1000] loss0.019-|Sample:14.89|
[TEST]
{'precision': array([0.02782146]), 'recall': array([0.06194353]), 'ndcg': array([0.05096791])}
EPOCH[371/1000] loss0.019-|Sample:14.30|
EPOCH[372/1000] loss0.019-|Sample:14.58|
EPOCH[373/1000] loss0.019-|Sample:12.12|
EPOCH[374/1000] loss0.019-|Sample:15.12|
EPOCH[375/1000] loss0.019-|Sample:14.70|
EPOCH[376/1000] loss0.019-|Sample:15.12|
EPOCH[377/1000] loss0.019-|Sample:14.92|
EPOCH[378/1000] loss0.019-|Sample:14.99|
EPOCH[379/1000] loss0.018-|Sample:15.05|
EPOCH[380/1000] loss0.019-|Sample:13.74|
[TEST]
{'precision': array([0.02782146]), 'recall': array([0.06181272]), 'ndcg': array([0.05090135])}
EPOCH[381/1000] loss0.019-|Sample:14.89|
EPOCH[382/1000] loss0.019-|Sample:15.16|
EPOCH[383/1000] loss0.018-|Sample:15.13|
EPOCH[384/1000] loss0.019-|Sample:13.19|
EPOCH[385/1000] loss0.018-|Sample:11.48|
EPOCH[386/1000] loss0.018-|Sample:15.17|
EPOCH[387/1000] loss0.018-|Sample:14.94|
EPOCH[388/1000] loss0.018-|Sample:14.64|
EPOCH[389/1000] loss0.018-|Sample:14.97|
EPOCH[390/1000] loss0.018-|Sample:14.77|
[TEST]
{'precision': array([0.02776462]), 'recall': array([0.06183379]), 'ndcg': array([0.05087865])}
EPOCH[391/1000] loss0.018-|Sample:14.55|
EPOCH[392/1000] loss0.018-|Sample:14.78|
EPOCH[393/1000] loss0.018-|Sample:14.95|
EPOCH[394/1000] loss0.018-|Sample:12.14|
EPOCH[395/1000] loss0.018-|Sample:14.84|
EPOCH[396/1000] loss0.018-|Sample:15.05|
EPOCH[397/1000] loss0.018-|Sample:14.84|
EPOCH[398/1000] loss0.018-|Sample:15.11|
EPOCH[399/1000] loss0.018-|Sample:15.13|
EPOCH[400/1000] loss0.018-|Sample:14.98|
[TEST]
{'precision': array([0.02787198]), 'recall': array([0.06193482]), 'ndcg': array([0.05079407])}
EPOCH[401/1000] loss0.018-|Sample:15.10|
EPOCH[402/1000] loss0.018-|Sample:15.01|
EPOCH[403/1000] loss0.018-|Sample:15.00|
EPOCH[404/1000] loss0.018-|Sample:15.02|
EPOCH[405/1000] loss0.019-|Sample:13.67|
EPOCH[406/1000] loss0.018-|Sample:15.04|
EPOCH[407/1000] loss0.018-|Sample:14.93|
EPOCH[408/1000] loss0.018-|Sample:15.14|
EPOCH[409/1000] loss0.018-|Sample:15.24|
EPOCH[410/1000] loss0.018-|Sample:15.24|
[TEST]
{'precision': array([0.02795567]), 'recall': array([0.06211773]), 'ndcg': array([0.05096398])}
EPOCH[411/1000] loss0.018-|Sample:14.82|
EPOCH[412/1000] loss0.018-|Sample:15.08|
EPOCH[413/1000] loss0.018-|Sample:15.01|
EPOCH[414/1000] loss0.018-|Sample:15.11|
EPOCH[415/1000] loss0.018-|Sample:14.96|
EPOCH[416/1000] loss0.018-|Sample:12.84|
EPOCH[417/1000] loss0.018-|Sample:13.22|
EPOCH[418/1000] loss0.018-|Sample:13.02|
EPOCH[419/1000] loss0.018-|Sample:15.06|
EPOCH[420/1000] loss0.018-|Sample:14.76|
[TEST]
{'precision': array([0.02797461]), 'recall': array([0.06205597]), 'ndcg': array([0.05114362])}
EPOCH[421/1000] loss0.018-|Sample:14.96|
EPOCH[422/1000] loss0.018-|Sample:15.09|
EPOCH[423/1000] loss0.018-|Sample:15.01|
EPOCH[424/1000] loss0.018-|Sample:14.73|
EPOCH[425/1000] loss0.018-|Sample:14.86|
EPOCH[426/1000] loss0.018-|Sample:13.13|
EPOCH[427/1000] loss0.018-|Sample:14.91|
EPOCH[428/1000] loss0.018-|Sample:14.80|
EPOCH[429/1000] loss0.018-|Sample:15.08|
EPOCH[430/1000] loss0.018-|Sample:14.94|
[TEST]
{'precision': array([0.02789251]), 'recall': array([0.0618813]), 'ndcg': array([0.05094909])}
EPOCH[431/1000] loss0.018-|Sample:14.75|
EPOCH[432/1000] loss0.018-|Sample:15.04|
EPOCH[433/1000] loss0.018-|Sample:14.92|
EPOCH[434/1000] loss0.018-|Sample:14.86|
EPOCH[435/1000] loss0.018-|Sample:15.19|
EPOCH[436/1000] loss0.018-|Sample:14.85|
EPOCH[437/1000] loss0.018-|Sample:13.79|
EPOCH[438/1000] loss0.018-|Sample:15.03|
EPOCH[439/1000] loss0.018-|Sample:14.73|
EPOCH[440/1000] loss0.018-|Sample:14.65|
[TEST]
{'precision': array([0.02800303]), 'recall': array([0.06218573]), 'ndcg': array([0.05106501])}
EPOCH[441/1000] loss0.018-|Sample:14.56|
EPOCH[442/1000] loss0.018-|Sample:14.94|
EPOCH[443/1000] loss0.018-|Sample:14.91|
EPOCH[444/1000] loss0.018-|Sample:15.15|
EPOCH[445/1000] loss0.018-|Sample:14.94|
EPOCH[446/1000] loss0.018-|Sample:14.95|
EPOCH[447/1000] loss0.018-|Sample:14.79|
EPOCH[448/1000] loss0.018-|Sample:12.34|
EPOCH[449/1000] loss0.018-|Sample:12.12|
EPOCH[450/1000] loss0.018-|Sample:15.00|
[TEST]
{'precision': array([0.0278783]), 'recall': array([0.06181605]), 'ndcg': array([0.05085339])}
EPOCH[451/1000] loss0.018-|Sample:14.60|
EPOCH[452/1000] loss0.018-|Sample:12.93|
EPOCH[453/1000] loss0.018-|Sample:15.32|
EPOCH[454/1000] loss0.018-|Sample:14.70|
EPOCH[455/1000] loss0.018-|Sample:14.89|
EPOCH[456/1000] loss0.018-|Sample:14.82|
EPOCH[457/1000] loss0.018-|Sample:14.92|
EPOCH[458/1000] loss0.018-|Sample:14.93|
EPOCH[459/1000] loss0.018-|Sample:9.75|
EPOCH[460/1000] loss0.018-|Sample:9.75|
[TEST]
{'precision': array([0.02788304]), 'recall': array([0.0619369]), 'ndcg': array([0.05084367])}
EPOCH[461/1000] loss0.018-|Sample:9.77|
EPOCH[462/1000] loss0.018-|Sample:9.78|
EPOCH[463/1000] loss0.018-|Sample:9.87|
EPOCH[464/1000] loss0.018-|Sample:9.81|
EPOCH[465/1000] loss0.018-|Sample:9.79|
EPOCH[466/1000] loss0.018-|Sample:9.76|
EPOCH[467/1000] loss0.018-|Sample:9.76|
EPOCH[468/1000] loss0.018-|Sample:9.70|
EPOCH[469/1000] loss0.018-|Sample:9.79|
EPOCH[470/1000] loss0.018-|Sample:9.78|
[TEST]
{'precision': array([0.02805513]), 'recall': array([0.0623174]), 'ndcg': array([0.05111008])}
EPOCH[471/1000] loss0.018-|Sample:9.71|
EPOCH[472/1000] loss0.018-|Sample:9.77|
EPOCH[473/1000] loss0.018-|Sample:9.71|
EPOCH[474/1000] loss0.018-|Sample:9.74|
EPOCH[475/1000] loss0.018-|Sample:9.80|
EPOCH[476/1000] loss0.018-|Sample:9.76|
EPOCH[477/1000] loss0.018-|Sample:9.77|
EPOCH[478/1000] loss0.018-|Sample:9.74|
EPOCH[479/1000] loss0.018-|Sample:9.87|
EPOCH[480/1000] loss0.018-|Sample:9.72|
[TEST]
{'precision': array([0.02787356]), 'recall': array([0.06177805]), 'ndcg': array([0.05090564])}
EPOCH[481/1000] loss0.018-|Sample:9.81|
EPOCH[482/1000] loss0.018-|Sample:9.82|
EPOCH[483/1000] loss0.018-|Sample:9.64|
EPOCH[484/1000] loss0.018-|Sample:9.87|
EPOCH[485/1000] loss0.018-|Sample:9.69|
EPOCH[486/1000] loss0.018-|Sample:9.82|
EPOCH[487/1000] loss0.018-|Sample:9.76|
EPOCH[488/1000] loss0.018-|Sample:9.81|
EPOCH[489/1000] loss0.018-|Sample:9.74|
EPOCH[490/1000] loss0.018-|Sample:9.80|
[TEST]
{'precision': array([0.02800303]), 'recall': array([0.06210192]), 'ndcg': array([0.05119755])}
EPOCH[491/1000] loss0.018-|Sample:9.72|
EPOCH[492/1000] loss0.018-|Sample:9.83|
EPOCH[493/1000] loss0.018-|Sample:9.79|
EPOCH[494/1000] loss0.018-|Sample:9.78|
EPOCH[495/1000] loss0.018-|Sample:9.74|
EPOCH[496/1000] loss0.018-|Sample:9.73|
EPOCH[497/1000] loss0.018-|Sample:9.80|
EPOCH[498/1000] loss0.018-|Sample:9.73|
EPOCH[499/1000] loss0.018-|Sample:9.77|
EPOCH[500/1000] loss0.018-|Sample:9.85|
[TEST]
{'precision': array([0.02799514]), 'recall': array([0.06192114]), 'ndcg': array([0.05127141])}
EPOCH[501/1000] loss0.018-|Sample:9.75|
EPOCH[502/1000] loss0.018-|Sample:9.87|
EPOCH[503/1000] loss0.018-|Sample:9.76|
EPOCH[504/1000] loss0.018-|Sample:9.69|
EPOCH[505/1000] loss0.018-|Sample:9.82|
EPOCH[506/1000] loss0.018-|Sample:9.80|
EPOCH[507/1000] loss0.018-|Sample:9.75|
EPOCH[508/1000] loss0.018-|Sample:9.80|
EPOCH[509/1000] loss0.018-|Sample:9.72|
EPOCH[510/1000] loss0.018-|Sample:9.77|
[TEST]
{'precision': array([0.0279383]), 'recall': array([0.06184894]), 'ndcg': array([0.05104397])}
EPOCH[511/1000] loss0.018-|Sample:9.70|
EPOCH[512/1000] loss0.018-|Sample:9.80|
EPOCH[513/1000] loss0.018-|Sample:9.77|
EPOCH[514/1000] loss0.018-|Sample:9.64|
EPOCH[515/1000] loss0.018-|Sample:9.82|
EPOCH[516/1000] loss0.018-|Sample:9.73|
EPOCH[517/1000] loss0.018-|Sample:9.83|
EPOCH[518/1000] loss0.018-|Sample:9.71|
EPOCH[519/1000] loss0.018-|Sample:9.76|
EPOCH[520/1000] loss0.018-|Sample:9.74|
[TEST]
{'precision': array([0.02787356]), 'recall': array([0.06178092]), 'ndcg': array([0.05102568])}
EPOCH[521/1000] loss0.018-|Sample:9.78|
EPOCH[522/1000] loss0.018-|Sample:9.76|
EPOCH[523/1000] loss0.018-|Sample:9.74|
EPOCH[524/1000] loss0.018-|Sample:9.76|
EPOCH[525/1000] loss0.018-|Sample:9.81|
EPOCH[526/1000] loss0.018-|Sample:9.71|
EPOCH[527/1000] loss0.018-|Sample:9.77|
EPOCH[528/1000] loss0.018-|Sample:9.79|
EPOCH[529/1000] loss0.018-|Sample:9.91|
EPOCH[530/1000] loss0.018-|Sample:9.72|
[TEST]
{'precision': array([0.02786725]), 'recall': array([0.06181687]), 'ndcg': array([0.05109649])}
EPOCH[531/1000] loss0.018-|Sample:9.73|
EPOCH[532/1000] loss0.018-|Sample:9.71|
EPOCH[533/1000] loss0.018-|Sample:9.76|
EPOCH[534/1000] loss0.018-|Sample:9.70|
EPOCH[535/1000] loss0.018-|Sample:9.71|
EPOCH[536/1000] loss0.018-|Sample:9.79|
EPOCH[537/1000] loss0.018-|Sample:9.78|
EPOCH[538/1000] loss0.018-|Sample:9.77|
EPOCH[539/1000] loss0.018-|Sample:9.84|
EPOCH[540/1000] loss0.018-|Sample:9.69|
[TEST]
{'precision': array([0.02809776]), 'recall': array([0.0623464]), 'ndcg': array([0.0514625])}
EPOCH[541/1000] loss0.018-|Sample:9.79|
EPOCH[542/1000] loss0.018-|Sample:9.72|
EPOCH[543/1000] loss0.018-|Sample:9.83|
EPOCH[544/1000] loss0.018-|Sample:9.79|
EPOCH[545/1000] loss0.018-|Sample:9.79|
EPOCH[546/1000] loss0.018-|Sample:9.81|
EPOCH[547/1000] loss0.018-|Sample:9.87|
EPOCH[548/1000] loss0.018-|Sample:9.80|
EPOCH[549/1000] loss0.018-|Sample:9.83|
EPOCH[550/1000] loss0.018-|Sample:9.76|
[TEST]
{'precision': array([0.02808829]), 'recall': array([0.06237088]), 'ndcg': array([0.05127737])}
EPOCH[551/1000] loss0.018-|Sample:9.69|
EPOCH[552/1000] loss0.018-|Sample:9.79|
EPOCH[553/1000] loss0.018-|Sample:9.76|
EPOCH[554/1000] loss0.018-|Sample:9.71|
EPOCH[555/1000] loss0.017-|Sample:9.72|
EPOCH[556/1000] loss0.018-|Sample:9.74|
EPOCH[557/1000] loss0.018-|Sample:9.80|
EPOCH[558/1000] loss0.018-|Sample:9.73|
EPOCH[559/1000] loss0.018-|Sample:9.67|
EPOCH[560/1000] loss0.018-|Sample:9.81|
[TEST]
{'precision': array([0.02807566]), 'recall': array([0.06229577]), 'ndcg': array([0.05140142])}
EPOCH[561/1000] loss0.018-|Sample:9.89|
EPOCH[562/1000] loss0.018-|Sample:9.77|
EPOCH[563/1000] loss0.018-|Sample:9.75|
EPOCH[564/1000] loss0.018-|Sample:9.71|
EPOCH[565/1000] loss0.018-|Sample:9.74|
EPOCH[566/1000] loss0.018-|Sample:9.86|
EPOCH[567/1000] loss0.018-|Sample:9.83|
EPOCH[568/1000] loss0.018-|Sample:10.23|
EPOCH[569/1000] loss0.018-|Sample:9.71|
EPOCH[570/1000] loss0.018-|Sample:9.81|
[TEST]
{'precision': array([0.02810566]), 'recall': array([0.06231944]), 'ndcg': array([0.05134776])}
EPOCH[571/1000] loss0.018-|Sample:10.12|
EPOCH[572/1000] loss0.018-|Sample:9.88|
EPOCH[573/1000] loss0.018-|Sample:9.80|
EPOCH[574/1000] loss0.018-|Sample:9.70|
EPOCH[575/1000] loss0.018-|Sample:9.82|
EPOCH[576/1000] loss0.018-|Sample:9.83|
EPOCH[577/1000] loss0.018-|Sample:9.78|
EPOCH[578/1000] loss0.018-|Sample:9.86|
EPOCH[579/1000] loss0.018-|Sample:9.77|
EPOCH[580/1000] loss0.018-|Sample:9.73|
[TEST]
{'precision': array([0.0282446]), 'recall': array([0.06261488]), 'ndcg': array([0.05151367])}
EPOCH[581/1000] loss0.018-|Sample:9.91|
EPOCH[582/1000] loss0.018-|Sample:9.77|
EPOCH[583/1000] loss0.018-|Sample:9.70|
EPOCH[584/1000] loss0.018-|Sample:9.89|
EPOCH[585/1000] loss0.017-|Sample:9.74|
EPOCH[586/1000] loss0.017-|Sample:9.85|
EPOCH[587/1000] loss0.018-|Sample:9.91|
EPOCH[588/1000] loss0.018-|Sample:9.70|
EPOCH[589/1000] loss0.018-|Sample:9.80|
EPOCH[590/1000] loss0.018-|Sample:9.82|
[TEST]
{'precision': array([0.02820986]), 'recall': array([0.06254105]), 'ndcg': array([0.05147659])}
EPOCH[591/1000] loss0.018-|Sample:9.74|
EPOCH[592/1000] loss0.018-|Sample:9.71|
EPOCH[593/1000] loss0.018-|Sample:9.82|
EPOCH[594/1000] loss0.017-|Sample:9.81|
EPOCH[595/1000] loss0.018-|Sample:9.66|
EPOCH[596/1000] loss0.017-|Sample:9.84|
EPOCH[597/1000] loss0.017-|Sample:9.80|
EPOCH[598/1000] loss0.018-|Sample:9.80|
EPOCH[599/1000] loss0.017-|Sample:9.99|
EPOCH[600/1000] loss0.018-|Sample:9.87|
[TEST]
{'precision': array([0.02820671]), 'recall': array([0.0626611]), 'ndcg': array([0.05144141])}
EPOCH[601/1000] loss0.018-|Sample:10.06|
EPOCH[602/1000] loss0.018-|Sample:9.84|
EPOCH[603/1000] loss0.018-|Sample:9.92|
EPOCH[604/1000] loss0.018-|Sample:9.86|
EPOCH[605/1000] loss0.018-|Sample:9.76|
EPOCH[606/1000] loss0.018-|Sample:10.08|
EPOCH[607/1000] loss0.018-|Sample:9.89|
EPOCH[608/1000] loss0.018-|Sample:9.90|
EPOCH[609/1000] loss0.017-|Sample:9.78|
EPOCH[610/1000] loss0.017-|Sample:10.11|
[TEST]
{'precision': array([0.02845143]), 'recall': array([0.06298509]), 'ndcg': array([0.05176238])}
EPOCH[611/1000] loss0.018-|Sample:9.91|
EPOCH[612/1000] loss0.017-|Sample:9.95|
EPOCH[613/1000] loss0.018-|Sample:9.85|
EPOCH[614/1000] loss0.017-|Sample:9.79|
EPOCH[615/1000] loss0.017-|Sample:10.19|
EPOCH[616/1000] loss0.017-|Sample:9.83|
EPOCH[617/1000] loss0.017-|Sample:10.00|
EPOCH[618/1000] loss0.018-|Sample:9.92|
EPOCH[619/1000] loss0.017-|Sample:10.01|
EPOCH[620/1000] loss0.018-|Sample:9.88|
[TEST]
{'precision': array([0.02823197]), 'recall': array([0.06264702]), 'ndcg': array([0.05156301])}
EPOCH[621/1000] loss0.017-|Sample:9.87|
EPOCH[622/1000] loss0.017-|Sample:9.80|
EPOCH[623/1000] loss0.017-|Sample:9.73|
EPOCH[624/1000] loss0.017-|Sample:9.79|
EPOCH[625/1000] loss0.017-|Sample:9.84|
EPOCH[626/1000] loss0.018-|Sample:9.89|
EPOCH[627/1000] loss0.018-|Sample:9.76|
EPOCH[628/1000] loss0.017-|Sample:9.83|
EPOCH[629/1000] loss0.017-|Sample:9.78|
EPOCH[630/1000] loss0.018-|Sample:9.88|
[TEST]
{'precision': array([0.02824934]), 'recall': array([0.06262276]), 'ndcg': array([0.05156272])}
EPOCH[631/1000] loss0.017-|Sample:9.75|
EPOCH[632/1000] loss0.017-|Sample:9.88|
EPOCH[633/1000] loss0.017-|Sample:9.87|
EPOCH[634/1000] loss0.017-|Sample:9.89|
EPOCH[635/1000] loss0.018-|Sample:9.89|
EPOCH[636/1000] loss0.017-|Sample:9.96|
EPOCH[637/1000] loss0.018-|Sample:9.92|
EPOCH[638/1000] loss0.017-|Sample:10.08|
EPOCH[639/1000] loss0.017-|Sample:9.98|
EPOCH[640/1000] loss0.017-|Sample:9.90|
[TEST]
{'precision': array([0.02821302]), 'recall': array([0.0626208]), 'ndcg': array([0.05156316])}
EPOCH[641/1000] loss0.017-|Sample:9.99|
EPOCH[642/1000] loss0.017-|Sample:10.13|
EPOCH[643/1000] loss0.017-|Sample:9.93|
EPOCH[644/1000] loss0.018-|Sample:9.96|
EPOCH[645/1000] loss0.018-|Sample:9.95|
EPOCH[646/1000] loss0.017-|Sample:9.90|
EPOCH[647/1000] loss0.017-|Sample:10.02|
EPOCH[648/1000] loss0.018-|Sample:9.85|
EPOCH[649/1000] loss0.017-|Sample:9.84|
EPOCH[650/1000] loss0.018-|Sample:9.93|
[TEST]
{'precision': array([0.0282967]), 'recall': array([0.06288115]), 'ndcg': array([0.05173157])}
EPOCH[651/1000] loss0.017-|Sample:9.88|
EPOCH[652/1000] loss0.018-|Sample:9.92|
EPOCH[653/1000] loss0.017-|Sample:9.91|
EPOCH[654/1000] loss0.017-|Sample:9.89|
EPOCH[655/1000] loss0.017-|Sample:9.96|
EPOCH[656/1000] loss0.017-|Sample:9.80|
EPOCH[657/1000] loss0.017-|Sample:9.94|
EPOCH[658/1000] loss0.017-|Sample:9.89|
EPOCH[659/1000] loss0.017-|Sample:9.98|
EPOCH[660/1000] loss0.017-|Sample:9.84|
[TEST]
{'precision': array([0.02838354]), 'recall': array([0.06294467]), 'ndcg': array([0.05181943])}
EPOCH[661/1000] loss0.017-|Sample:9.97|
EPOCH[662/1000] loss0.017-|Sample:9.92|
EPOCH[663/1000] loss0.017-|Sample:9.77|
EPOCH[664/1000] loss0.017-|Sample:9.96|
EPOCH[665/1000] loss0.017-|Sample:9.90|
EPOCH[666/1000] loss0.017-|Sample:9.86|
EPOCH[667/1000] loss0.017-|Sample:9.84|
EPOCH[668/1000] loss0.017-|Sample:9.82|
EPOCH[669/1000] loss0.017-|Sample:9.89|
EPOCH[670/1000] loss0.017-|Sample:9.92|
[TEST]
{'precision': array([0.02826197]), 'recall': array([0.06261461]), 'ndcg': array([0.05168101])}
EPOCH[671/1000] loss0.017-|Sample:9.92|
EPOCH[672/1000] loss0.017-|Sample:9.95|
EPOCH[673/1000] loss0.017-|Sample:10.02|
EPOCH[674/1000] loss0.017-|Sample:10.01|
EPOCH[675/1000] loss0.017-|Sample:9.89|
EPOCH[676/1000] loss0.017-|Sample:9.90|
EPOCH[677/1000] loss0.018-|Sample:9.89|
EPOCH[678/1000] loss0.017-|Sample:9.89|
EPOCH[679/1000] loss0.017-|Sample:9.89|
EPOCH[680/1000] loss0.017-|Sample:9.92|
[TEST]
{'precision': array([0.02826039]), 'recall': array([0.06267261]), 'ndcg': array([0.0518123])}
EPOCH[681/1000] loss0.017-|Sample:10.04|
EPOCH[682/1000] loss0.017-|Sample:9.90|
EPOCH[683/1000] loss0.017-|Sample:9.89|
EPOCH[684/1000] loss0.017-|Sample:9.88|
EPOCH[685/1000] loss0.017-|Sample:9.87|
EPOCH[686/1000] loss0.017-|Sample:9.84|
EPOCH[687/1000] loss0.017-|Sample:9.98|
EPOCH[688/1000] loss0.017-|Sample:9.87|
EPOCH[689/1000] loss0.017-|Sample:9.89|
EPOCH[690/1000] loss0.017-|Sample:9.88|
[TEST]
{'precision': array([0.02837881]), 'recall': array([0.06287681]), 'ndcg': array([0.05190271])}
EPOCH[691/1000] loss0.017-|Sample:9.83|
EPOCH[692/1000] loss0.017-|Sample:10.00|
EPOCH[693/1000] loss0.017-|Sample:9.85|
EPOCH[694/1000] loss0.017-|Sample:9.91|
EPOCH[695/1000] loss0.017-|Sample:10.01|
EPOCH[696/1000] loss0.017-|Sample:9.84|
EPOCH[697/1000] loss0.017-|Sample:9.95|
EPOCH[698/1000] loss0.017-|Sample:9.84|
EPOCH[699/1000] loss0.017-|Sample:9.93|
EPOCH[700/1000] loss0.017-|Sample:9.89|
[TEST]
{'precision': array([0.02831723]), 'recall': array([0.06273302]), 'ndcg': array([0.05180851])}
EPOCH[701/1000] loss0.017-|Sample:9.91|
EPOCH[702/1000] loss0.017-|Sample:9.92|
EPOCH[703/1000] loss0.017-|Sample:9.76|
EPOCH[704/1000] loss0.017-|Sample:9.89|
EPOCH[705/1000] loss0.017-|Sample:9.89|
EPOCH[706/1000] loss0.017-|Sample:9.94|
EPOCH[707/1000] loss0.017-|Sample:9.83|
EPOCH[708/1000] loss0.017-|Sample:9.92|
EPOCH[709/1000] loss0.017-|Sample:9.96|
EPOCH[710/1000] loss0.017-|Sample:9.81|
[TEST]
{'precision': array([0.02829986]), 'recall': array([0.0627535]), 'ndcg': array([0.05175537])}
EPOCH[711/1000] loss0.017-|Sample:9.87|
EPOCH[712/1000] loss0.017-|Sample:9.96|
EPOCH[713/1000] loss0.017-|Sample:9.94|
EPOCH[714/1000] loss0.017-|Sample:9.93|
EPOCH[715/1000] loss0.017-|Sample:9.93|
EPOCH[716/1000] loss0.017-|Sample:9.89|
EPOCH[717/1000] loss0.017-|Sample:9.84|
EPOCH[718/1000] loss0.017-|Sample:9.87|
EPOCH[719/1000] loss0.017-|Sample:9.94|
EPOCH[720/1000] loss0.017-|Sample:9.91|
[TEST]
{'precision': array([0.02834249]), 'recall': array([0.06289309]), 'ndcg': array([0.05180685])}
EPOCH[721/1000] loss0.018-|Sample:9.96|
EPOCH[722/1000] loss0.017-|Sample:9.95|
EPOCH[723/1000] loss0.017-|Sample:9.94|
EPOCH[724/1000] loss0.017-|Sample:9.85|
EPOCH[725/1000] loss0.017-|Sample:9.98|
EPOCH[726/1000] loss0.017-|Sample:9.87|
EPOCH[727/1000] loss0.017-|Sample:9.94|
EPOCH[728/1000] loss0.017-|Sample:9.75|
EPOCH[729/1000] loss0.017-|Sample:9.86|
EPOCH[730/1000] loss0.017-|Sample:9.85|
[TEST]
{'precision': array([0.02831249]), 'recall': array([0.06272432]), 'ndcg': array([0.05177032])}
EPOCH[731/1000] loss0.017-|Sample:9.89|
EPOCH[732/1000] loss0.017-|Sample:9.93|
EPOCH[733/1000] loss0.017-|Sample:9.80|
EPOCH[734/1000] loss0.017-|Sample:9.80|
EPOCH[735/1000] loss0.017-|Sample:9.85|
EPOCH[736/1000] loss0.017-|Sample:9.80|
EPOCH[737/1000] loss0.017-|Sample:9.93|
EPOCH[738/1000] loss0.017-|Sample:9.79|
EPOCH[739/1000] loss0.017-|Sample:9.87|
EPOCH[740/1000] loss0.017-|Sample:9.82|
[TEST]
{'precision': array([0.02824934]), 'recall': array([0.06264115]), 'ndcg': array([0.05173224])}
EPOCH[741/1000] loss0.017-|Sample:9.85|
EPOCH[742/1000] loss0.017-|Sample:9.75|
EPOCH[743/1000] loss0.017-|Sample:9.73|
EPOCH[744/1000] loss0.017-|Sample:9.88|
EPOCH[745/1000] loss0.017-|Sample:9.77|
EPOCH[746/1000] loss0.017-|Sample:9.87|
EPOCH[747/1000] loss0.017-|Sample:9.82|
EPOCH[748/1000] loss0.017-|Sample:9.79|
EPOCH[749/1000] loss0.017-|Sample:9.89|
EPOCH[750/1000] loss0.017-|Sample:9.85|
[TEST]
{'precision': array([0.02838038]), 'recall': array([0.06301765]), 'ndcg': array([0.05183815])}
EPOCH[751/1000] loss0.017-|Sample:9.84|
EPOCH[752/1000] loss0.017-|Sample:9.83|
EPOCH[753/1000] loss0.017-|Sample:9.90|
EPOCH[754/1000] loss0.017-|Sample:9.90|
EPOCH[755/1000] loss0.017-|Sample:9.82|
EPOCH[756/1000] loss0.017-|Sample:10.08|
EPOCH[757/1000] loss0.017-|Sample:9.87|
EPOCH[758/1000] loss0.017-|Sample:9.78|
EPOCH[759/1000] loss0.017-|Sample:9.85|
EPOCH[760/1000] loss0.017-|Sample:9.87|
[TEST]
{'precision': array([0.02841354]), 'recall': array([0.06311391]), 'ndcg': array([0.05194946])}
EPOCH[761/1000] loss0.017-|Sample:9.96|
EPOCH[762/1000] loss0.017-|Sample:9.89|
EPOCH[763/1000] loss0.017-|Sample:9.84|
EPOCH[764/1000] loss0.017-|Sample:9.73|
EPOCH[765/1000] loss0.017-|Sample:10.10|
EPOCH[766/1000] loss0.017-|Sample:9.92|
EPOCH[767/1000] loss0.017-|Sample:9.88|
EPOCH[768/1000] loss0.017-|Sample:9.76|
EPOCH[769/1000] loss0.017-|Sample:9.76|
EPOCH[770/1000] loss0.017-|Sample:9.83|
[TEST]
{'precision': array([0.02830144]), 'recall': array([0.06270617]), 'ndcg': array([0.0517171])}
EPOCH[771/1000] loss0.017-|Sample:9.80|
EPOCH[772/1000] loss0.017-|Sample:9.86|
EPOCH[773/1000] loss0.017-|Sample:9.84|
EPOCH[774/1000] loss0.017-|Sample:10.03|
EPOCH[775/1000] loss0.017-|Sample:10.11|
EPOCH[776/1000] loss0.017-|Sample:10.27|
EPOCH[777/1000] loss0.017-|Sample:10.55|
EPOCH[778/1000] loss0.017-|Sample:10.61|
EPOCH[779/1000] loss0.017-|Sample:10.53|
EPOCH[780/1000] loss0.017-|Sample:10.68|
[TEST]
{'precision': array([0.02835828]), 'recall': array([0.06281605]), 'ndcg': array([0.05174188])}
EPOCH[781/1000] loss0.017-|Sample:10.55|
EPOCH[782/1000] loss0.017-|Sample:10.76|
EPOCH[783/1000] loss0.017-|Sample:10.66|
EPOCH[784/1000] loss0.017-|Sample:10.72|
EPOCH[785/1000] loss0.017-|Sample:10.39|
EPOCH[786/1000] loss0.017-|Sample:10.85|
EPOCH[787/1000] loss0.017-|Sample:10.69|
EPOCH[788/1000] loss0.017-|Sample:9.87|
EPOCH[789/1000] loss0.017-|Sample:9.86|
EPOCH[790/1000] loss0.017-|Sample:9.90|
[TEST]
{'precision': array([0.02836302]), 'recall': array([0.06302386]), 'ndcg': array([0.05195231])}
EPOCH[791/1000] loss0.017-|Sample:9.82|
EPOCH[792/1000] loss0.017-|Sample:9.85|
EPOCH[793/1000] loss0.017-|Sample:9.96|
EPOCH[794/1000] loss0.017-|Sample:9.98|
EPOCH[795/1000] loss0.017-|Sample:9.81|
EPOCH[796/1000] loss0.017-|Sample:9.75|
EPOCH[797/1000] loss0.017-|Sample:9.93|
EPOCH[798/1000] loss0.017-|Sample:9.89|
EPOCH[799/1000] loss0.017-|Sample:9.96|
EPOCH[800/1000] loss0.017-|Sample:10.00|
[TEST]
{'precision': array([0.02831881]), 'recall': array([0.06288111]), 'ndcg': array([0.05181315])}
EPOCH[801/1000] loss0.017-|Sample:9.86|
EPOCH[802/1000] loss0.017-|Sample:9.81|
EPOCH[803/1000] loss0.017-|Sample:9.78|
EPOCH[804/1000] loss0.017-|Sample:9.80|
EPOCH[805/1000] loss0.017-|Sample:9.80|
EPOCH[806/1000] loss0.017-|Sample:9.87|
EPOCH[807/1000] loss0.017-|Sample:9.88|
EPOCH[808/1000] loss0.017-|Sample:9.74|
EPOCH[809/1000] loss0.017-|Sample:9.75|
EPOCH[810/1000] loss0.017-|Sample:9.75|
[TEST]
{'precision': array([0.02825565]), 'recall': array([0.06276563]), 'ndcg': array([0.05168764])}
EPOCH[811/1000] loss0.017-|Sample:9.85|
EPOCH[812/1000] loss0.017-|Sample:9.83|
EPOCH[813/1000] loss0.017-|Sample:9.87|
EPOCH[814/1000] loss0.017-|Sample:9.73|
EPOCH[815/1000] loss0.017-|Sample:9.94|
EPOCH[816/1000] loss0.017-|Sample:9.79|
EPOCH[817/1000] loss0.017-|Sample:9.84|
EPOCH[818/1000] loss0.017-|Sample:9.74|
EPOCH[819/1000] loss0.017-|Sample:9.96|
EPOCH[820/1000] loss0.017-|Sample:9.75|
[TEST]
{'precision': array([0.02835512]), 'recall': array([0.06285168]), 'ndcg': array([0.05196755])}
EPOCH[821/1000] loss0.017-|Sample:9.80|
EPOCH[822/1000] loss0.017-|Sample:9.65|
EPOCH[823/1000] loss0.017-|Sample:9.87|
EPOCH[824/1000] loss0.017-|Sample:9.96|
EPOCH[825/1000] loss0.017-|Sample:9.71|
EPOCH[826/1000] loss0.017-|Sample:9.89|
EPOCH[827/1000] loss0.017-|Sample:9.78|
EPOCH[828/1000] loss0.017-|Sample:9.76|
EPOCH[829/1000] loss0.017-|Sample:9.79|
EPOCH[830/1000] loss0.017-|Sample:9.85|
[TEST]
{'precision': array([0.02831723]), 'recall': array([0.06273103]), 'ndcg': array([0.05190606])}
EPOCH[831/1000] loss0.017-|Sample:9.81|
EPOCH[832/1000] loss0.017-|Sample:9.73|
EPOCH[833/1000] loss0.017-|Sample:9.91|
EPOCH[834/1000] loss0.017-|Sample:9.82|
EPOCH[835/1000] loss0.017-|Sample:9.81|
EPOCH[836/1000] loss0.017-|Sample:9.81|
EPOCH[837/1000] loss0.017-|Sample:9.78|
EPOCH[838/1000] loss0.017-|Sample:9.91|
EPOCH[839/1000] loss0.017-|Sample:9.77|
EPOCH[840/1000] loss0.017-|Sample:9.88|
[TEST]
{'precision': array([0.02839775]), 'recall': array([0.06291887]), 'ndcg': array([0.05207194])}
EPOCH[841/1000] loss0.017-|Sample:9.74|
EPOCH[842/1000] loss0.017-|Sample:9.90|
EPOCH[843/1000] loss0.017-|Sample:9.81|
EPOCH[844/1000] loss0.017-|Sample:9.73|
EPOCH[845/1000] loss0.017-|Sample:9.91|
EPOCH[846/1000] loss0.017-|Sample:9.78|
EPOCH[847/1000] loss0.017-|Sample:9.92|
EPOCH[848/1000] loss0.017-|Sample:9.87|
EPOCH[849/1000] loss0.017-|Sample:9.90|
EPOCH[850/1000] loss0.017-|Sample:9.76|
[TEST]
{'precision': array([0.02842617]), 'recall': array([0.06309758]), 'ndcg': array([0.0520275])}
EPOCH[851/1000] loss0.017-|Sample:9.85|
EPOCH[852/1000] loss0.017-|Sample:9.91|
EPOCH[853/1000] loss0.017-|Sample:9.77|
EPOCH[854/1000] loss0.017-|Sample:9.87|
EPOCH[855/1000] loss0.017-|Sample:9.91|
EPOCH[856/1000] loss0.017-|Sample:9.80|
EPOCH[857/1000] loss0.017-|Sample:9.92|
EPOCH[858/1000] loss0.017-|Sample:9.87|
EPOCH[859/1000] loss0.017-|Sample:9.90|
EPOCH[860/1000] loss0.017-|Sample:9.78|
[TEST]
{'precision': array([0.0283646]), 'recall': array([0.06280064]), 'ndcg': array([0.05204889])}
EPOCH[861/1000] loss0.017-|Sample:9.87|
EPOCH[862/1000] loss0.017-|Sample:9.78|
EPOCH[863/1000] loss0.017-|Sample:9.83|
EPOCH[864/1000] loss0.017-|Sample:9.88|
EPOCH[865/1000] loss0.017-|Sample:9.83|
EPOCH[866/1000] loss0.017-|Sample:9.84|
EPOCH[867/1000] loss0.017-|Sample:9.79|
EPOCH[868/1000] loss0.017-|Sample:9.81|
EPOCH[869/1000] loss0.017-|Sample:9.85|
EPOCH[870/1000] loss0.017-|Sample:9.81|
[TEST]
{'precision': array([0.02844828]), 'recall': array([0.06291217]), 'ndcg': array([0.0519816])}
EPOCH[871/1000] loss0.017-|Sample:9.77|
EPOCH[872/1000] loss0.017-|Sample:9.81|
EPOCH[873/1000] loss0.017-|Sample:9.93|
EPOCH[874/1000] loss0.017-|Sample:9.77|
EPOCH[875/1000] loss0.017-|Sample:9.85|
EPOCH[876/1000] loss0.017-|Sample:9.97|
EPOCH[877/1000] loss0.017-|Sample:10.14|
EPOCH[878/1000] loss0.017-|Sample:10.22|
EPOCH[879/1000] loss0.017-|Sample:9.83|
EPOCH[880/1000] loss0.017-|Sample:9.86|
[TEST]
{'precision': array([0.02834091]), 'recall': array([0.062899]), 'ndcg': array([0.05184339])}
EPOCH[881/1000] loss0.017-|Sample:10.48|
EPOCH[882/1000] loss0.017-|Sample:9.95|
EPOCH[883/1000] loss0.017-|Sample:9.75|
EPOCH[884/1000] loss0.017-|Sample:9.79|
EPOCH[885/1000] loss0.017-|Sample:9.88|
EPOCH[886/1000] loss0.017-|Sample:9.95|
EPOCH[887/1000] loss0.017-|Sample:9.88|
EPOCH[888/1000] loss0.017-|Sample:10.06|
EPOCH[889/1000] loss0.017-|Sample:9.76|
EPOCH[890/1000] loss0.017-|Sample:9.92|
[TEST]
{'precision': array([0.02848617]), 'recall': array([0.06319114]), 'ndcg': array([0.05205499])}
EPOCH[891/1000] loss0.017-|Sample:9.83|
EPOCH[892/1000] loss0.017-|Sample:9.96|
EPOCH[893/1000] loss0.017-|Sample:9.86|
EPOCH[894/1000] loss0.017-|Sample:9.87|
EPOCH[895/1000] loss0.017-|Sample:9.94|
EPOCH[896/1000] loss0.017-|Sample:9.85|
EPOCH[897/1000] loss0.017-|Sample:9.93|
EPOCH[898/1000] loss0.017-|Sample:9.82|
EPOCH[899/1000] loss0.017-|Sample:9.89|
EPOCH[900/1000] loss0.017-|Sample:9.86|
[TEST]
{'precision': array([0.02844196]), 'recall': array([0.06313487]), 'ndcg': array([0.05205931])}
EPOCH[901/1000] loss0.017-|Sample:9.94|
EPOCH[902/1000] loss0.017-|Sample:9.74|
EPOCH[903/1000] loss0.017-|Sample:9.97|
EPOCH[904/1000] loss0.017-|Sample:9.87|
EPOCH[905/1000] loss0.017-|Sample:9.78|
EPOCH[906/1000] loss0.017-|Sample:9.89|
EPOCH[907/1000] loss0.017-|Sample:10.05|
EPOCH[908/1000] loss0.017-|Sample:9.80|
EPOCH[909/1000] loss0.017-|Sample:9.83|
EPOCH[910/1000] loss0.017-|Sample:9.85|
[TEST]
{'precision': array([0.02845617]), 'recall': array([0.06307056]), 'ndcg': array([0.05191496])}
EPOCH[911/1000] loss0.017-|Sample:9.87|
EPOCH[912/1000] loss0.017-|Sample:9.85|
EPOCH[913/1000] loss0.017-|Sample:9.86|
EPOCH[914/1000] loss0.017-|Sample:9.95|
EPOCH[915/1000] loss0.017-|Sample:9.78|
EPOCH[916/1000] loss0.017-|Sample:9.91|
EPOCH[917/1000] loss0.017-|Sample:9.97|
EPOCH[918/1000] loss0.017-|Sample:9.94|
EPOCH[919/1000] loss0.017-|Sample:9.86|
EPOCH[920/1000] loss0.017-|Sample:9.95|
[TEST]
{'precision': array([0.02850196]), 'recall': array([0.06334486]), 'ndcg': array([0.05218238])}
EPOCH[921/1000] loss0.017-|Sample:9.95|
EPOCH[922/1000] loss0.017-|Sample:9.98|
EPOCH[923/1000] loss0.017-|Sample:9.87|
EPOCH[924/1000] loss0.017-|Sample:9.86|
EPOCH[925/1000] loss0.017-|Sample:9.81|
EPOCH[926/1000] loss0.017-|Sample:9.74|
EPOCH[927/1000] loss0.017-|Sample:9.78|
EPOCH[928/1000] loss0.017-|Sample:9.85|
EPOCH[929/1000] loss0.017-|Sample:9.73|
EPOCH[930/1000] loss0.017-|Sample:9.84|
[TEST]
{'precision': array([0.02837881]), 'recall': array([0.06272709]), 'ndcg': array([0.05184556])}
EPOCH[931/1000] loss0.017-|Sample:9.81|
EPOCH[932/1000] loss0.017-|Sample:9.98|
EPOCH[933/1000] loss0.017-|Sample:9.83|
EPOCH[934/1000] loss0.017-|Sample:9.86|
EPOCH[935/1000] loss0.017-|Sample:9.85|
EPOCH[936/1000] loss0.017-|Sample:9.77|
EPOCH[937/1000] loss0.017-|Sample:10.13|
EPOCH[938/1000] loss0.017-|Sample:9.98|
EPOCH[939/1000] loss0.017-|Sample:10.06|
EPOCH[940/1000] loss0.017-|Sample:9.87|
[TEST]
{'precision': array([0.02841038]), 'recall': array([0.06297553]), 'ndcg': array([0.05198401])}
EPOCH[941/1000] loss0.017-|Sample:10.02|
EPOCH[942/1000] loss0.017-|Sample:9.86|
EPOCH[943/1000] loss0.017-|Sample:9.78|
EPOCH[944/1000] loss0.017-|Sample:10.04|
EPOCH[945/1000] loss0.017-|Sample:9.71|
EPOCH[946/1000] loss0.017-|Sample:9.83|
EPOCH[947/1000] loss0.017-|Sample:9.89|
EPOCH[948/1000] loss0.017-|Sample:9.97|
EPOCH[949/1000] loss0.017-|Sample:10.02|
EPOCH[950/1000] loss0.017-|Sample:9.80|
[TEST]
{'precision': array([0.0284767]), 'recall': array([0.06321504]), 'ndcg': array([0.05217019])}
EPOCH[951/1000] loss0.017-|Sample:10.04|
EPOCH[952/1000] loss0.017-|Sample:9.81|
EPOCH[953/1000] loss0.017-|Sample:9.92|
EPOCH[954/1000] loss0.017-|Sample:9.99|
EPOCH[955/1000] loss0.017-|Sample:10.05|
EPOCH[956/1000] loss0.017-|Sample:9.96|
EPOCH[957/1000] loss0.017-|Sample:9.86|
EPOCH[958/1000] loss0.017-|Sample:9.89|
EPOCH[959/1000] loss0.017-|Sample:9.78|
EPOCH[960/1000] loss0.017-|Sample:9.90|
[TEST]
{'precision': array([0.02848459]), 'recall': array([0.06332756]), 'ndcg': array([0.05218027])}
EPOCH[961/1000] loss0.017-|Sample:9.80|
EPOCH[962/1000] loss0.017-|Sample:9.87|
EPOCH[963/1000] loss0.017-|Sample:9.83|
EPOCH[964/1000] loss0.017-|Sample:9.91|
EPOCH[965/1000] loss0.017-|Sample:9.95|
EPOCH[966/1000] loss0.017-|Sample:9.83|
EPOCH[967/1000] loss0.017-|Sample:9.84|
EPOCH[968/1000] loss0.017-|Sample:9.78|
EPOCH[969/1000] loss0.017-|Sample:9.83|
EPOCH[970/1000] loss0.017-|Sample:9.89|
[TEST]
{'precision': array([0.02844512]), 'recall': array([0.06324226]), 'ndcg': array([0.05203292])}
EPOCH[971/1000] loss0.017-|Sample:9.82|
EPOCH[972/1000] loss0.017-|Sample:9.97|
EPOCH[973/1000] loss0.017-|Sample:9.87|
EPOCH[974/1000] loss0.017-|Sample:9.82|
EPOCH[975/1000] loss0.017-|Sample:9.92|
EPOCH[976/1000] loss0.017-|Sample:9.85|
EPOCH[977/1000] loss0.017-|Sample:9.89|
EPOCH[978/1000] loss0.017-|Sample:9.82|
EPOCH[979/1000] loss0.017-|Sample:9.86|
EPOCH[980/1000] loss0.017-|Sample:9.88|
[TEST]
{'precision': array([0.02834091]), 'recall': array([0.06296389]), 'ndcg': array([0.05180162])}
EPOCH[981/1000] loss0.017-|Sample:9.87|
EPOCH[982/1000] loss0.017-|Sample:9.73|
EPOCH[983/1000] loss0.017-|Sample:9.85|
EPOCH[984/1000] loss0.017-|Sample:9.89|
EPOCH[985/1000] loss0.017-|Sample:9.76|
EPOCH[986/1000] loss0.017-|Sample:9.83|
EPOCH[987/1000] loss0.017-|Sample:9.78|
EPOCH[988/1000] loss0.017-|Sample:9.87|
EPOCH[989/1000] loss0.017-|Sample:9.86|
EPOCH[990/1000] loss0.017-|Sample:9.87|
[TEST]
{'precision': array([0.02832354]), 'recall': array([0.0631651]), 'ndcg': array([0.05188748])}
EPOCH[991/1000] loss0.017-|Sample:9.81|
EPOCH[992/1000] loss0.017-|Sample:9.79|
EPOCH[993/1000] loss0.017-|Sample:9.88|
EPOCH[994/1000] loss0.017-|Sample:9.79|
EPOCH[995/1000] loss0.017-|Sample:9.84|
EPOCH[996/1000] loss0.017-|Sample:9.85|
EPOCH[997/1000] loss0.017-|Sample:9.86|
EPOCH[998/1000] loss0.017-|Sample:9.94|
EPOCH[999/1000] loss0.017-|Sample:9.85|
EPOCH[1000/1000] loss0.017-|Sample:9.90|

Process finished with exit code 0

New computer：5月30日 21：45：33--5月31日 19：14：43  耗时：21：31：10 
D:\ProgramFiles\Anaconda3\envs\image_caption_python36\python.exe D:/workspace/LightGcn/LightGCN-PyTorch-master/code/main.py
Cpp extension not loaded
>>SEED: 2020
loading [../data/yelp2018]
1237259 interactions for training
324147 interactions for testing
yelp2018 Sparsity : 0.0012958757851778647
yelp2018 is ready to go
===========config================
{'A_n_fold': 100,
 'A_split': False,
 'bigdata': False,
 'bpr_batch_size': 2048,
 'decay': 0.0001,
 'dropout': 0,
 'keep_prob': 0.6,
 'latent_dim_rec': 64,
 'lightGCN_n_layers': 3,
 'lr': 0.001,
 'multicore': 0,
 'pretrain': 0,
 'test_u_batch_size': 100}
cores for test: 6
comment: lgn
tensorboard: 1
LOAD: 0
Weight path: ./checkpoints
Test Topks: [20]
using bpr loss
===========end===================
use NORMAL distribution initilizer
loading adjacency matrix
successfully loaded...
don't split the matrix
lgn is already to go(dropout:0)
load and save to /home/qhc/下载/LightGCN-PyTorch-master\code\checkpoints\lgn-yelp2018-3-64.pth.tar
[TEST]
{'precision': array([0.00028894]), 'recall': array([0.00052394]), 'ndcg': array([0.00046472])}
EPOCH[1/1000] loss0.391-|Sample:6.89|
EPOCH[2/1000] loss0.162-|Sample:7.42|
EPOCH[3/1000] loss0.148-|Sample:7.11|
EPOCH[4/1000] loss0.139-|Sample:7.30|
EPOCH[5/1000] loss0.132-|Sample:7.31|
EPOCH[6/1000] loss0.125-|Sample:7.47|
EPOCH[7/1000] loss0.118-|Sample:7.59|
EPOCH[8/1000] loss0.113-|Sample:7.40|
EPOCH[9/1000] loss0.108-|Sample:7.80|
EPOCH[10/1000] loss0.105-|Sample:8.04|
[TEST]
{'precision': array([0.01822818]), 'recall': array([0.0403148]), 'ndcg': array([0.03220471])}
EPOCH[11/1000] loss0.101-|Sample:7.40|
EPOCH[12/1000] loss0.098-|Sample:7.50|
EPOCH[13/1000] loss0.096-|Sample:7.90|
EPOCH[14/1000] loss0.093-|Sample:7.34|
EPOCH[15/1000] loss0.091-|Sample:7.25|
EPOCH[16/1000] loss0.088-|Sample:8.67|
EPOCH[17/1000] loss0.087-|Sample:7.31|
EPOCH[18/1000] loss0.085-|Sample:7.61|
EPOCH[19/1000] loss0.083-|Sample:7.39|
EPOCH[20/1000] loss0.081-|Sample:7.42|
[TEST]
{'precision': array([0.01991758]), 'recall': array([0.0441209]), 'ndcg': array([0.03533267])}
EPOCH[21/1000] loss0.079-|Sample:7.36|
EPOCH[22/1000] loss0.078-|Sample:7.47|
EPOCH[23/1000] loss0.076-|Sample:7.14|
EPOCH[24/1000] loss0.075-|Sample:7.67|
EPOCH[25/1000] loss0.074-|Sample:7.23|
EPOCH[26/1000] loss0.072-|Sample:7.26|
EPOCH[27/1000] loss0.071-|Sample:7.62|
EPOCH[28/1000] loss0.070-|Sample:7.25|
EPOCH[29/1000] loss0.069-|Sample:7.61|
EPOCH[30/1000] loss0.068-|Sample:7.34|
[TEST]
{'precision': array([0.0209328]), 'recall': array([0.04641602]), 'ndcg': array([0.03745864])}
EPOCH[31/1000] loss0.067-|Sample:7.47|
EPOCH[32/1000] loss0.066-|Sample:7.31|
EPOCH[33/1000] loss0.064-|Sample:8.03|
EPOCH[34/1000] loss0.064-|Sample:7.48|
EPOCH[35/1000] loss0.063-|Sample:7.51|
EPOCH[36/1000] loss0.062-|Sample:7.31|
EPOCH[37/1000] loss0.061-|Sample:7.39|
EPOCH[38/1000] loss0.060-|Sample:7.47|
EPOCH[39/1000] loss0.059-|Sample:7.28|
EPOCH[40/1000] loss0.058-|Sample:7.51|
[TEST]
{'precision': array([0.02193066]), 'recall': array([0.04886138]), 'ndcg': array([0.03926094])}
EPOCH[41/1000] loss0.057-|Sample:7.51|
EPOCH[42/1000] loss0.057-|Sample:7.22|
EPOCH[43/1000] loss0.056-|Sample:7.44|
EPOCH[44/1000] loss0.056-|Sample:7.48|
EPOCH[45/1000] loss0.055-|Sample:7.28|
EPOCH[46/1000] loss0.055-|Sample:7.33|
EPOCH[47/1000] loss0.054-|Sample:7.56|
EPOCH[48/1000] loss0.053-|Sample:7.59|
EPOCH[49/1000] loss0.053-|Sample:7.62|
EPOCH[50/1000] loss0.052-|Sample:7.19|
[TEST]
{'precision': array([0.02264273]), 'recall': array([0.05064395]), 'ndcg': array([0.04064262])}
EPOCH[51/1000] loss0.052-|Sample:7.36|
EPOCH[52/1000] loss0.050-|Sample:7.30|
EPOCH[53/1000] loss0.050-|Sample:8.09|
EPOCH[54/1000] loss0.049-|Sample:7.40|
EPOCH[55/1000] loss0.049-|Sample:7.53|
EPOCH[56/1000] loss0.048-|Sample:7.26|
EPOCH[57/1000] loss0.048-|Sample:7.42|
EPOCH[58/1000] loss0.047-|Sample:7.45|
EPOCH[59/1000] loss0.047-|Sample:7.19|
EPOCH[60/1000] loss0.047-|Sample:7.48|
[TEST]
{'precision': array([0.02349217]), 'recall': array([0.05262705]), 'ndcg': array([0.04221743])}
EPOCH[61/1000] loss0.046-|Sample:8.56|
EPOCH[62/1000] loss0.046-|Sample:7.33|
EPOCH[63/1000] loss0.045-|Sample:7.25|
EPOCH[64/1000] loss0.045-|Sample:7.58|
EPOCH[65/1000] loss0.044-|Sample:7.30|
EPOCH[66/1000] loss0.044-|Sample:7.44|
EPOCH[67/1000] loss0.044-|Sample:7.30|
EPOCH[68/1000] loss0.043-|Sample:7.45|
EPOCH[69/1000] loss0.043-|Sample:7.95|
EPOCH[70/1000] loss0.043-|Sample:7.34|
[TEST]
{'precision': array([0.02404793]), 'recall': array([0.05388463]), 'ndcg': array([0.04338055])}
EPOCH[71/1000] loss0.042-|Sample:7.39|
EPOCH[72/1000] loss0.042-|Sample:8.00|
EPOCH[73/1000] loss0.041-|Sample:7.31|
EPOCH[74/1000] loss0.041-|Sample:7.31|
EPOCH[75/1000] loss0.041-|Sample:7.83|
EPOCH[76/1000] loss0.040-|Sample:7.23|
EPOCH[77/1000] loss0.040-|Sample:7.42|
EPOCH[78/1000] loss0.040-|Sample:7.25|
EPOCH[79/1000] loss0.040-|Sample:7.56|
EPOCH[80/1000] loss0.039-|Sample:7.39|
[TEST]
{'precision': array([0.02464633]), 'recall': array([0.05549943]), 'ndcg': array([0.04469457])}
EPOCH[81/1000] loss0.039-|Sample:7.76|
EPOCH[82/1000] loss0.038-|Sample:7.30|
EPOCH[83/1000] loss0.039-|Sample:7.58|
EPOCH[84/1000] loss0.038-|Sample:7.20|
EPOCH[85/1000] loss0.038-|Sample:7.61|
EPOCH[86/1000] loss0.038-|Sample:7.48|
EPOCH[87/1000] loss0.037-|Sample:7.30|
EPOCH[88/1000] loss0.037-|Sample:7.53|
EPOCH[89/1000] loss0.037-|Sample:7.87|
EPOCH[90/1000] loss0.036-|Sample:7.47|
[TEST]
{'precision': array([0.02486895]), 'recall': array([0.05589941]), 'ndcg': array([0.04525079])}
EPOCH[91/1000] loss0.036-|Sample:7.80|
EPOCH[92/1000] loss0.035-|Sample:7.59|
EPOCH[93/1000] loss0.035-|Sample:7.62|
EPOCH[94/1000] loss0.036-|Sample:7.31|
EPOCH[95/1000] loss0.035-|Sample:7.65|
EPOCH[96/1000] loss0.035-|Sample:7.45|
EPOCH[97/1000] loss0.034-|Sample:7.40|
EPOCH[98/1000] loss0.035-|Sample:7.26|
EPOCH[99/1000] loss0.034-|Sample:7.51|
EPOCH[100/1000] loss0.034-|Sample:7.39|
[TEST]
{'precision': array([0.02514841]), 'recall': array([0.05646542]), 'ndcg': array([0.04589234])}
EPOCH[101/1000] loss0.034-|Sample:7.64|
EPOCH[102/1000] loss0.034-|Sample:7.45|
EPOCH[103/1000] loss0.033-|Sample:7.37|
EPOCH[104/1000] loss0.033-|Sample:7.30|
EPOCH[105/1000] loss0.033-|Sample:8.04|
EPOCH[106/1000] loss0.033-|Sample:7.50|
EPOCH[107/1000] loss0.032-|Sample:7.51|
EPOCH[108/1000] loss0.032-|Sample:7.72|
EPOCH[109/1000] loss0.032-|Sample:7.44|
EPOCH[110/1000] loss0.032-|Sample:7.61|
[TEST]
{'precision': array([0.0256726]), 'recall': array([0.05774875]), 'ndcg': array([0.04683821])}
EPOCH[111/1000] loss0.032-|Sample:7.44|
EPOCH[112/1000] loss0.032-|Sample:7.56|
EPOCH[113/1000] loss0.032-|Sample:7.30|
EPOCH[114/1000] loss0.031-|Sample:7.78|
EPOCH[115/1000] loss0.031-|Sample:7.55|
EPOCH[116/1000] loss0.031-|Sample:7.78|
EPOCH[117/1000] loss0.031-|Sample:7.83|
EPOCH[118/1000] loss0.031-|Sample:7.23|
EPOCH[119/1000] loss0.031-|Sample:7.53|
EPOCH[120/1000] loss0.030-|Sample:7.55|
[TEST]
{'precision': array([0.02599627]), 'recall': array([0.05836596]), 'ndcg': array([0.04740773])}
EPOCH[121/1000] loss0.030-|Sample:7.31|
EPOCH[122/1000] loss0.030-|Sample:7.87|
EPOCH[123/1000] loss0.030-|Sample:7.50|
EPOCH[124/1000] loss0.030-|Sample:7.37|
EPOCH[125/1000] loss0.030-|Sample:7.34|
EPOCH[126/1000] loss0.029-|Sample:7.70|
EPOCH[127/1000] loss0.029-|Sample:7.59|
EPOCH[128/1000] loss0.029-|Sample:7.48|
EPOCH[129/1000] loss0.029-|Sample:7.31|
EPOCH[130/1000] loss0.029-|Sample:7.92|
[TEST]
{'precision': array([0.02614311]), 'recall': array([0.05868562]), 'ndcg': array([0.04774432])}
EPOCH[131/1000] loss0.029-|Sample:7.28|
EPOCH[132/1000] loss0.029-|Sample:8.01|
EPOCH[133/1000] loss0.028-|Sample:7.53|
EPOCH[134/1000] loss0.028-|Sample:7.48|
EPOCH[135/1000] loss0.028-|Sample:7.33|
EPOCH[136/1000] loss0.028-|Sample:7.64|
EPOCH[137/1000] loss0.028-|Sample:7.62|
EPOCH[138/1000] loss0.028-|Sample:7.37|
EPOCH[139/1000] loss0.028-|Sample:7.45|
EPOCH[140/1000] loss0.028-|Sample:7.34|
[TEST]
{'precision': array([0.02652204]), 'recall': array([0.05941555]), 'ndcg': array([0.04850263])}
EPOCH[141/1000] loss0.028-|Sample:7.37|
EPOCH[142/1000] loss0.028-|Sample:7.25|
EPOCH[143/1000] loss0.027-|Sample:7.51|
EPOCH[144/1000] loss0.027-|Sample:7.42|
EPOCH[145/1000] loss0.027-|Sample:8.00|
EPOCH[146/1000] loss0.027-|Sample:7.31|
EPOCH[147/1000] loss0.027-|Sample:7.39|
EPOCH[148/1000] loss0.027-|Sample:7.53|
EPOCH[149/1000] loss0.027-|Sample:7.44|
EPOCH[150/1000] loss0.027-|Sample:7.39|
[TEST]
{'precision': array([0.02656941]), 'recall': array([0.05969023]), 'ndcg': array([0.04862301])}
EPOCH[151/1000] loss0.026-|Sample:7.72|
EPOCH[152/1000] loss0.026-|Sample:7.25|
EPOCH[153/1000] loss0.026-|Sample:7.51|
EPOCH[154/1000] loss0.026-|Sample:7.58|
EPOCH[155/1000] loss0.026-|Sample:7.39|
EPOCH[156/1000] loss0.026-|Sample:7.50|
EPOCH[157/1000] loss0.026-|Sample:7.31|
EPOCH[158/1000] loss0.026-|Sample:7.51|
EPOCH[159/1000] loss0.026-|Sample:7.40|
EPOCH[160/1000] loss0.026-|Sample:7.28|
[TEST]
{'precision': array([0.02661835]), 'recall': array([0.05967897]), 'ndcg': array([0.04871443])}
EPOCH[161/1000] loss0.026-|Sample:7.44|
EPOCH[162/1000] loss0.026-|Sample:7.31|
EPOCH[163/1000] loss0.025-|Sample:7.28|
EPOCH[164/1000] loss0.026-|Sample:7.50|
EPOCH[165/1000] loss0.025-|Sample:7.80|
EPOCH[166/1000] loss0.025-|Sample:7.37|
EPOCH[167/1000] loss0.025-|Sample:7.95|
EPOCH[168/1000] loss0.025-|Sample:7.70|
EPOCH[169/1000] loss0.025-|Sample:7.26|
EPOCH[170/1000] loss0.025-|Sample:7.42|
[TEST]
{'precision': array([0.02691834]), 'recall': array([0.06046201]), 'ndcg': array([0.0491748])}
EPOCH[171/1000] loss0.025-|Sample:7.50|
EPOCH[172/1000] loss0.025-|Sample:7.40|
EPOCH[173/1000] loss0.025-|Sample:7.40|
EPOCH[174/1000] loss0.025-|Sample:7.98|
EPOCH[175/1000] loss0.025-|Sample:7.20|
EPOCH[176/1000] loss0.024-|Sample:7.45|
EPOCH[177/1000] loss0.025-|Sample:7.72|
EPOCH[178/1000] loss0.024-|Sample:7.70|
EPOCH[179/1000] loss0.024-|Sample:7.50|
EPOCH[180/1000] loss0.024-|Sample:7.31|
[TEST]
{'precision': array([0.02679361]), 'recall': array([0.05998562]), 'ndcg': array([0.04909955])}
EPOCH[181/1000] loss0.024-|Sample:7.40|
EPOCH[182/1000] loss0.024-|Sample:7.51|
EPOCH[183/1000] loss0.024-|Sample:7.30|
EPOCH[184/1000] loss0.024-|Sample:7.51|
EPOCH[185/1000] loss0.024-|Sample:7.51|
EPOCH[186/1000] loss0.024-|Sample:7.37|
EPOCH[187/1000] loss0.024-|Sample:7.70|
EPOCH[188/1000] loss0.024-|Sample:7.45|
EPOCH[189/1000] loss0.024-|Sample:7.76|
EPOCH[190/1000] loss0.024-|Sample:7.44|
[TEST]
{'precision': array([0.0269215]), 'recall': array([0.06022275]), 'ndcg': array([0.04932166])}
EPOCH[191/1000] loss0.023-|Sample:7.84|
EPOCH[192/1000] loss0.024-|Sample:7.51|
EPOCH[193/1000] loss0.023-|Sample:7.72|
EPOCH[194/1000] loss0.024-|Sample:7.37|
EPOCH[195/1000] loss0.023-|Sample:7.44|
EPOCH[196/1000] loss0.023-|Sample:7.80|
EPOCH[197/1000] loss0.024-|Sample:7.42|
EPOCH[198/1000] loss0.023-|Sample:7.39|
EPOCH[199/1000] loss0.023-|Sample:8.72|
EPOCH[200/1000] loss0.023-|Sample:7.44|
[TEST]
{'precision': array([0.0270857]), 'recall': array([0.06073274]), 'ndcg': array([0.04970141])}
EPOCH[201/1000] loss0.023-|Sample:7.34|
EPOCH[202/1000] loss0.023-|Sample:7.51|
EPOCH[203/1000] loss0.023-|Sample:7.30|
EPOCH[204/1000] loss0.023-|Sample:7.23|
EPOCH[205/1000] loss0.023-|Sample:7.76|
EPOCH[206/1000] loss0.023-|Sample:7.31|
EPOCH[207/1000] loss0.023-|Sample:7.58|
EPOCH[208/1000] loss0.023-|Sample:7.25|
EPOCH[209/1000] loss0.023-|Sample:7.30|
EPOCH[210/1000] loss0.023-|Sample:8.67|
[TEST]
{'precision': array([0.02721991]), 'recall': array([0.06114427]), 'ndcg': array([0.04987262])}
EPOCH[211/1000] loss0.023-|Sample:7.51|
EPOCH[212/1000] loss0.023-|Sample:7.30|
EPOCH[213/1000] loss0.023-|Sample:7.55|
EPOCH[214/1000] loss0.023-|Sample:7.42|
EPOCH[215/1000] loss0.022-|Sample:7.55|
EPOCH[216/1000] loss0.022-|Sample:7.61|
EPOCH[217/1000] loss0.022-|Sample:7.51|
EPOCH[218/1000] loss0.023-|Sample:7.65|
EPOCH[219/1000] loss0.022-|Sample:7.33|
EPOCH[220/1000] loss0.022-|Sample:7.47|
[TEST]
{'precision': array([0.02725622]), 'recall': array([0.06078575]), 'ndcg': array([0.04975729])}
EPOCH[221/1000] loss0.022-|Sample:7.36|
EPOCH[222/1000] loss0.022-|Sample:7.47|
EPOCH[223/1000] loss0.022-|Sample:7.50|
EPOCH[224/1000] loss0.022-|Sample:7.64|
EPOCH[225/1000] loss0.022-|Sample:7.50|
EPOCH[226/1000] loss0.022-|Sample:7.22|
EPOCH[227/1000] loss0.022-|Sample:7.51|
EPOCH[228/1000] loss0.022-|Sample:7.53|
EPOCH[229/1000] loss0.022-|Sample:7.28|
EPOCH[230/1000] loss0.022-|Sample:7.33|
[TEST]
{'precision': array([0.02731148]), 'recall': array([0.06118469]), 'ndcg': array([0.04992477])}
EPOCH[231/1000] loss0.022-|Sample:7.50|
EPOCH[232/1000] loss0.022-|Sample:7.34|
EPOCH[233/1000] loss0.022-|Sample:7.53|
EPOCH[234/1000] loss0.022-|Sample:7.39|
EPOCH[235/1000] loss0.022-|Sample:7.48|
EPOCH[236/1000] loss0.022-|Sample:7.28|
EPOCH[237/1000] loss0.022-|Sample:7.37|
EPOCH[238/1000] loss0.022-|Sample:7.58|
EPOCH[239/1000] loss0.022-|Sample:7.36|
EPOCH[240/1000] loss0.022-|Sample:7.55|
[TEST]
{'precision': array([0.02747411]), 'recall': array([0.06152012]), 'ndcg': array([0.0501329])}
EPOCH[241/1000] loss0.022-|Sample:7.31|
EPOCH[242/1000] loss0.022-|Sample:7.31|
EPOCH[243/1000] loss0.022-|Sample:7.44|
EPOCH[244/1000] loss0.022-|Sample:7.61|
EPOCH[245/1000] loss0.022-|Sample:7.47|
EPOCH[246/1000] loss0.021-|Sample:7.56|
EPOCH[247/1000] loss0.021-|Sample:7.64|
EPOCH[248/1000] loss0.021-|Sample:7.39|
EPOCH[249/1000] loss0.021-|Sample:7.61|
EPOCH[250/1000] loss0.021-|Sample:7.40|
[TEST]
{'precision': array([0.02750568]), 'recall': array([0.06141867]), 'ndcg': array([0.05025597])}
EPOCH[251/1000] loss0.021-|Sample:7.95|
EPOCH[252/1000] loss0.021-|Sample:7.23|
EPOCH[253/1000] loss0.021-|Sample:7.56|
EPOCH[254/1000] loss0.021-|Sample:7.36|
EPOCH[255/1000] loss0.021-|Sample:7.84|
EPOCH[256/1000] loss0.021-|Sample:7.30|
EPOCH[257/1000] loss0.021-|Sample:7.62|
EPOCH[258/1000] loss0.021-|Sample:7.64|
EPOCH[259/1000] loss0.021-|Sample:7.23|
EPOCH[260/1000] loss0.021-|Sample:7.56|
[TEST]
{'precision': array([0.02764936]), 'recall': array([0.06153188]), 'ndcg': array([0.05036291])}
EPOCH[261/1000] loss0.021-|Sample:7.55|
EPOCH[262/1000] loss0.021-|Sample:7.48|
EPOCH[263/1000] loss0.021-|Sample:7.34|
EPOCH[264/1000] loss0.021-|Sample:7.48|
EPOCH[265/1000] loss0.021-|Sample:7.47|
EPOCH[266/1000] loss0.021-|Sample:7.80|
EPOCH[267/1000] loss0.021-|Sample:7.40|
EPOCH[268/1000] loss0.021-|Sample:7.47|
EPOCH[269/1000] loss0.021-|Sample:7.55|
EPOCH[270/1000] loss0.021-|Sample:7.34|
[TEST]
{'precision': array([0.02753568]), 'recall': array([0.06149811]), 'ndcg': array([0.05025988])}
EPOCH[271/1000] loss0.021-|Sample:7.50|
EPOCH[272/1000] loss0.021-|Sample:7.50|
EPOCH[273/1000] loss0.021-|Sample:7.40|
EPOCH[274/1000] loss0.021-|Sample:7.61|
EPOCH[275/1000] loss0.021-|Sample:7.90|
EPOCH[276/1000] loss0.021-|Sample:7.31|
EPOCH[277/1000] loss0.021-|Sample:7.84|
EPOCH[278/1000] loss0.020-|Sample:8.04|
EPOCH[279/1000] loss0.020-|Sample:7.51|
EPOCH[280/1000] loss0.021-|Sample:7.47|
[TEST]
{'precision': array([0.027542]), 'recall': array([0.06143462]), 'ndcg': array([0.05034992])}
EPOCH[281/1000] loss0.021-|Sample:7.56|
EPOCH[282/1000] loss0.021-|Sample:7.37|
EPOCH[283/1000] loss0.021-|Sample:7.31|
EPOCH[284/1000] loss0.021-|Sample:7.50|
EPOCH[285/1000] loss0.021-|Sample:7.50|
EPOCH[286/1000] loss0.021-|Sample:7.69|
EPOCH[287/1000] loss0.021-|Sample:7.33|
EPOCH[288/1000] loss0.021-|Sample:7.67|
EPOCH[289/1000] loss0.020-|Sample:7.81|
EPOCH[290/1000] loss0.021-|Sample:7.36|
[TEST]
{'precision': array([0.02774094]), 'recall': array([0.06175311]), 'ndcg': array([0.05071264])}
EPOCH[291/1000] loss0.020-|Sample:7.28|
EPOCH[292/1000] loss0.020-|Sample:7.53|
EPOCH[293/1000] loss0.021-|Sample:7.80|
EPOCH[294/1000] loss0.020-|Sample:7.44|
EPOCH[295/1000] loss0.020-|Sample:7.92|
EPOCH[296/1000] loss0.020-|Sample:7.37|
EPOCH[297/1000] loss0.020-|Sample:7.55|
EPOCH[298/1000] loss0.020-|Sample:7.28|
EPOCH[299/1000] loss0.020-|Sample:7.39|
EPOCH[300/1000] loss0.020-|Sample:7.83|
[TEST]
{'precision': array([0.02766989]), 'recall': array([0.06166229]), 'ndcg': array([0.0507203])}
EPOCH[301/1000] loss0.020-|Sample:7.45|
EPOCH[302/1000] loss0.020-|Sample:7.67|
EPOCH[303/1000] loss0.020-|Sample:7.51|
EPOCH[304/1000] loss0.020-|Sample:7.48|
EPOCH[305/1000] loss0.020-|Sample:7.53|
EPOCH[306/1000] loss0.020-|Sample:7.58|
EPOCH[307/1000] loss0.020-|Sample:7.34|
EPOCH[308/1000] loss0.020-|Sample:7.28|
EPOCH[309/1000] loss0.020-|Sample:7.25|
EPOCH[310/1000] loss0.020-|Sample:7.48|
[TEST]
{'precision': array([0.02783093]), 'recall': array([0.06206131]), 'ndcg': array([0.05093164])}
EPOCH[311/1000] loss0.020-|Sample:7.30|
EPOCH[312/1000] loss0.020-|Sample:7.51|
EPOCH[313/1000] loss0.020-|Sample:7.97|
EPOCH[314/1000] loss0.020-|Sample:7.31|
EPOCH[315/1000] loss0.020-|Sample:7.34|
EPOCH[316/1000] loss0.020-|Sample:7.56|
EPOCH[317/1000] loss0.020-|Sample:7.59|
EPOCH[318/1000] loss0.020-|Sample:7.31|
EPOCH[319/1000] loss0.020-|Sample:7.59|
EPOCH[320/1000] loss0.020-|Sample:7.51|
[TEST]
{'precision': array([0.02792251]), 'recall': array([0.0621691]), 'ndcg': array([0.05098717])}
EPOCH[321/1000] loss0.020-|Sample:7.30|
EPOCH[322/1000] loss0.020-|Sample:7.51|
EPOCH[323/1000] loss0.020-|Sample:7.76|
EPOCH[324/1000] loss0.020-|Sample:7.36|
EPOCH[325/1000] loss0.020-|Sample:7.47|
EPOCH[326/1000] loss0.020-|Sample:7.67|
EPOCH[327/1000] loss0.020-|Sample:7.55|
EPOCH[328/1000] loss0.020-|Sample:7.37|
EPOCH[329/1000] loss0.020-|Sample:7.42|
EPOCH[330/1000] loss0.020-|Sample:7.70|
[TEST]
{'precision': array([0.02783725]), 'recall': array([0.06200006]), 'ndcg': array([0.0510059])}
EPOCH[331/1000] loss0.020-|Sample:7.73|
EPOCH[332/1000] loss0.020-|Sample:7.94|
EPOCH[333/1000] loss0.020-|Sample:7.31|
EPOCH[334/1000] loss0.020-|Sample:7.51|
EPOCH[335/1000] loss0.020-|Sample:7.45|
EPOCH[336/1000] loss0.020-|Sample:7.81|
EPOCH[337/1000] loss0.020-|Sample:7.56|
EPOCH[338/1000] loss0.020-|Sample:7.45|
EPOCH[339/1000] loss0.020-|Sample:7.72|
EPOCH[340/1000] loss0.020-|Sample:7.37|
[TEST]
{'precision': array([0.02769515]), 'recall': array([0.06182743]), 'ndcg': array([0.05082049])}
EPOCH[341/1000] loss0.020-|Sample:7.61|
EPOCH[342/1000] loss0.020-|Sample:7.39|
EPOCH[343/1000] loss0.020-|Sample:7.86|
EPOCH[344/1000] loss0.020-|Sample:7.22|
EPOCH[345/1000] loss0.019-|Sample:7.59|
EPOCH[346/1000] loss0.020-|Sample:7.33|
EPOCH[347/1000] loss0.020-|Sample:7.69|
EPOCH[348/1000] loss0.020-|Sample:7.40|
EPOCH[349/1000] loss0.020-|Sample:7.42|
EPOCH[350/1000] loss0.020-|Sample:7.58|
[TEST]
{'precision': array([0.02779304]), 'recall': array([0.06189335]), 'ndcg': array([0.05098055])}
EPOCH[351/1000] loss0.019-|Sample:7.47|
EPOCH[352/1000] loss0.020-|Sample:7.67|
EPOCH[353/1000] loss0.020-|Sample:7.36|
EPOCH[354/1000] loss0.019-|Sample:8.11|
EPOCH[355/1000] loss0.020-|Sample:7.45|
EPOCH[356/1000] loss0.020-|Sample:7.53|
EPOCH[357/1000] loss0.020-|Sample:7.59|
EPOCH[358/1000] loss0.020-|Sample:7.45|
EPOCH[359/1000] loss0.019-|Sample:7.55|
EPOCH[360/1000] loss0.020-|Sample:7.42|
[TEST]
{'precision': array([0.02786409]), 'recall': array([0.06195828]), 'ndcg': array([0.05100784])}
EPOCH[361/1000] loss0.019-|Sample:7.20|
EPOCH[362/1000] loss0.019-|Sample:7.20|
EPOCH[363/1000] loss0.020-|Sample:7.61|
EPOCH[364/1000] loss0.019-|Sample:7.40|
EPOCH[365/1000] loss0.019-|Sample:7.69|
EPOCH[366/1000] loss0.019-|Sample:7.28|
EPOCH[367/1000] loss0.019-|Sample:7.42|
EPOCH[368/1000] loss0.019-|Sample:7.62|
EPOCH[369/1000] loss0.019-|Sample:7.65|
EPOCH[370/1000] loss0.019-|Sample:7.45|
[TEST]
{'precision': array([0.02787514]), 'recall': array([0.06209891]), 'ndcg': array([0.0510203])}
EPOCH[371/1000] loss0.019-|Sample:7.90|
EPOCH[372/1000] loss0.019-|Sample:7.40|
EPOCH[373/1000] loss0.019-|Sample:7.33|
EPOCH[374/1000] loss0.019-|Sample:7.47|
EPOCH[375/1000] loss0.020-|Sample:7.44|
EPOCH[376/1000] loss0.019-|Sample:7.45|
EPOCH[377/1000] loss0.019-|Sample:7.26|
EPOCH[378/1000] loss0.019-|Sample:8.29|
EPOCH[379/1000] loss0.019-|Sample:7.94|
EPOCH[380/1000] loss0.019-|Sample:7.30|
[TEST]
{'precision': array([0.02792093]), 'recall': array([0.06212261]), 'ndcg': array([0.05110981])}
EPOCH[381/1000] loss0.019-|Sample:7.42|
EPOCH[382/1000] loss0.019-|Sample:7.75|
EPOCH[383/1000] loss0.019-|Sample:7.42|
EPOCH[384/1000] loss0.019-|Sample:7.44|
EPOCH[385/1000] loss0.019-|Sample:7.65|
EPOCH[386/1000] loss0.019-|Sample:7.33|
EPOCH[387/1000] loss0.019-|Sample:7.69|
EPOCH[388/1000] loss0.019-|Sample:7.36|
EPOCH[389/1000] loss0.019-|Sample:7.56|
EPOCH[390/1000] loss0.019-|Sample:7.39|
[TEST]
{'precision': array([0.0278262]), 'recall': array([0.06198637]), 'ndcg': array([0.05103374])}
EPOCH[391/1000] loss0.019-|Sample:7.50|
EPOCH[392/1000] loss0.019-|Sample:7.23|
EPOCH[393/1000] loss0.019-|Sample:7.76|
EPOCH[394/1000] loss0.019-|Sample:7.25|
EPOCH[395/1000] loss0.019-|Sample:8.34|
EPOCH[396/1000] loss0.019-|Sample:7.55|
EPOCH[397/1000] loss0.019-|Sample:7.34|
EPOCH[398/1000] loss0.019-|Sample:7.53|
EPOCH[399/1000] loss0.019-|Sample:7.30|
EPOCH[400/1000] loss0.019-|Sample:7.75|
[TEST]
{'precision': array([0.02797619]), 'recall': array([0.06227263]), 'ndcg': array([0.05106125])}
EPOCH[401/1000] loss0.019-|Sample:7.51|
EPOCH[402/1000] loss0.019-|Sample:7.34|
EPOCH[403/1000] loss0.019-|Sample:7.30|
EPOCH[404/1000] loss0.019-|Sample:7.51|
EPOCH[405/1000] loss0.019-|Sample:7.62|
EPOCH[406/1000] loss0.019-|Sample:7.47|
EPOCH[407/1000] loss0.019-|Sample:7.25|
EPOCH[408/1000] loss0.019-|Sample:7.39|
EPOCH[409/1000] loss0.019-|Sample:7.58|
EPOCH[410/1000] loss0.019-|Sample:7.23|
[TEST]
{'precision': array([0.02808198]), 'recall': array([0.0625187]), 'ndcg': array([0.05125583])}
EPOCH[411/1000] loss0.019-|Sample:7.48|
EPOCH[412/1000] loss0.019-|Sample:7.51|
EPOCH[413/1000] loss0.019-|Sample:7.34|
EPOCH[414/1000] loss0.019-|Sample:7.64|
EPOCH[415/1000] loss0.019-|Sample:7.47|
EPOCH[416/1000] loss0.019-|Sample:7.33|
EPOCH[417/1000] loss0.019-|Sample:7.40|
EPOCH[418/1000] loss0.019-|Sample:7.58|
EPOCH[419/1000] loss0.019-|Sample:7.47|
EPOCH[420/1000] loss0.019-|Sample:7.55|
[TEST]
{'precision': array([0.02798882]), 'recall': array([0.0621339]), 'ndcg': array([0.05120227])}
EPOCH[421/1000] loss0.019-|Sample:8.08|
EPOCH[422/1000] loss0.019-|Sample:7.30|
EPOCH[423/1000] loss0.019-|Sample:7.31|
EPOCH[424/1000] loss0.019-|Sample:7.65|
EPOCH[425/1000] loss0.019-|Sample:7.89|
EPOCH[426/1000] loss0.019-|Sample:7.50|
EPOCH[427/1000] loss0.019-|Sample:7.40|
EPOCH[428/1000] loss0.019-|Sample:7.48|
EPOCH[429/1000] loss0.019-|Sample:7.80|
EPOCH[430/1000] loss0.019-|Sample:7.33|
[TEST]
{'precision': array([0.0279383]), 'recall': array([0.06207608]), 'ndcg': array([0.05110859])}
EPOCH[431/1000] loss0.019-|Sample:7.37|
EPOCH[432/1000] loss0.019-|Sample:7.73|
EPOCH[433/1000] loss0.019-|Sample:7.40|
EPOCH[434/1000] loss0.019-|Sample:7.39|
EPOCH[435/1000] loss0.019-|Sample:7.84|
EPOCH[436/1000] loss0.019-|Sample:7.26|
EPOCH[437/1000] loss0.019-|Sample:7.42|
EPOCH[438/1000] loss0.019-|Sample:7.30|
EPOCH[439/1000] loss0.019-|Sample:7.81|
EPOCH[440/1000] loss0.019-|Sample:7.47|
[TEST]
{'precision': array([0.02805987]), 'recall': array([0.06239304]), 'ndcg': array([0.05129498])}
EPOCH[441/1000] loss0.019-|Sample:7.56|
EPOCH[442/1000] loss0.019-|Sample:7.45|
EPOCH[443/1000] loss0.019-|Sample:7.47|
EPOCH[444/1000] loss0.019-|Sample:7.15|
EPOCH[445/1000] loss0.019-|Sample:7.56|
EPOCH[446/1000] loss0.019-|Sample:7.40|
EPOCH[447/1000] loss0.019-|Sample:7.23|
EPOCH[448/1000] loss0.019-|Sample:7.45|
EPOCH[449/1000] loss0.019-|Sample:7.51|
EPOCH[450/1000] loss0.019-|Sample:8.12|
[TEST]
{'precision': array([0.02796356]), 'recall': array([0.06217465]), 'ndcg': array([0.05101626])}
EPOCH[451/1000] loss0.019-|Sample:7.73|
EPOCH[452/1000] loss0.019-|Sample:7.48|
EPOCH[453/1000] loss0.019-|Sample:7.23|
EPOCH[454/1000] loss0.019-|Sample:7.48|
EPOCH[455/1000] loss0.019-|Sample:7.40|
EPOCH[456/1000] loss0.019-|Sample:7.53|
EPOCH[457/1000] loss0.019-|Sample:7.28|
EPOCH[458/1000] loss0.019-|Sample:7.31|
EPOCH[459/1000] loss0.019-|Sample:7.67|
EPOCH[460/1000] loss0.019-|Sample:7.28|
[TEST]
{'precision': array([0.02792251]), 'recall': array([0.06215079]), 'ndcg': array([0.0510501])}
EPOCH[461/1000] loss0.019-|Sample:7.36|
EPOCH[462/1000] loss0.019-|Sample:7.45|
EPOCH[463/1000] loss0.019-|Sample:7.40|
EPOCH[464/1000] loss0.019-|Sample:7.31|
EPOCH[465/1000] loss0.019-|Sample:7.56|
EPOCH[466/1000] loss0.019-|Sample:7.26|
EPOCH[467/1000] loss0.019-|Sample:7.62|
EPOCH[468/1000] loss0.019-|Sample:7.22|
EPOCH[469/1000] loss0.019-|Sample:7.59|
EPOCH[470/1000] loss0.019-|Sample:7.40|
[TEST]
{'precision': array([0.02808513]), 'recall': array([0.06237344]), 'ndcg': array([0.05128833])}
EPOCH[471/1000] loss0.019-|Sample:7.62|
EPOCH[472/1000] loss0.019-|Sample:7.39|
EPOCH[473/1000] loss0.019-|Sample:7.72|
EPOCH[474/1000] loss0.019-|Sample:7.30|
EPOCH[475/1000] loss0.019-|Sample:7.48|
EPOCH[476/1000] loss0.019-|Sample:7.92|
EPOCH[477/1000] loss0.019-|Sample:7.36|
EPOCH[478/1000] loss0.019-|Sample:7.55|
EPOCH[479/1000] loss0.019-|Sample:7.58|
EPOCH[480/1000] loss0.019-|Sample:7.51|
[TEST]
{'precision': array([0.0278562]), 'recall': array([0.06181255]), 'ndcg': array([0.05103468])}
EPOCH[481/1000] loss0.019-|Sample:7.31|
EPOCH[482/1000] loss0.018-|Sample:7.51|
EPOCH[483/1000] loss0.019-|Sample:7.34|
EPOCH[484/1000] loss0.019-|Sample:7.23|
EPOCH[485/1000] loss0.019-|Sample:7.56|
EPOCH[486/1000] loss0.019-|Sample:7.40|
EPOCH[487/1000] loss0.019-|Sample:8.00|
EPOCH[488/1000] loss0.018-|Sample:7.59|
EPOCH[489/1000] loss0.019-|Sample:7.44|
EPOCH[490/1000] loss0.019-|Sample:8.14|
[TEST]
{'precision': array([0.02800619]), 'recall': array([0.06214417]), 'ndcg': array([0.05130812])}
EPOCH[491/1000] loss0.019-|Sample:7.48|
EPOCH[492/1000] loss0.019-|Sample:7.37|
EPOCH[493/1000] loss0.019-|Sample:7.62|
EPOCH[494/1000] loss0.019-|Sample:7.28|
EPOCH[495/1000] loss0.019-|Sample:7.39|
EPOCH[496/1000] loss0.019-|Sample:7.58|
EPOCH[497/1000] loss0.019-|Sample:7.28|
EPOCH[498/1000] loss0.019-|Sample:7.44|
EPOCH[499/1000] loss0.019-|Sample:7.25|
EPOCH[500/1000] loss0.019-|Sample:7.53|
[TEST]
{'precision': array([0.02803461]), 'recall': array([0.06214277]), 'ndcg': array([0.05135843])}
EPOCH[501/1000] loss0.019-|Sample:7.33|
EPOCH[502/1000] loss0.019-|Sample:7.61|
EPOCH[503/1000] loss0.018-|Sample:7.23|
EPOCH[504/1000] loss0.019-|Sample:7.47|
EPOCH[505/1000] loss0.019-|Sample:7.45|
EPOCH[506/1000] loss0.018-|Sample:7.50|
EPOCH[507/1000] loss0.019-|Sample:7.53|
EPOCH[508/1000] loss0.019-|Sample:7.48|
EPOCH[509/1000] loss0.019-|Sample:7.80|
EPOCH[510/1000] loss0.019-|Sample:7.33|
[TEST]
{'precision': array([0.02797145]), 'recall': array([0.06192129]), 'ndcg': array([0.05113713])}
EPOCH[511/1000] loss0.019-|Sample:7.44|
EPOCH[512/1000] loss0.019-|Sample:7.44|
EPOCH[513/1000] loss0.019-|Sample:7.67|
EPOCH[514/1000] loss0.019-|Sample:7.36|
EPOCH[515/1000] loss0.019-|Sample:7.48|
EPOCH[516/1000] loss0.018-|Sample:7.20|
EPOCH[517/1000] loss0.018-|Sample:7.50|
EPOCH[518/1000] loss0.019-|Sample:7.39|
EPOCH[519/1000] loss0.019-|Sample:7.30|
EPOCH[520/1000] loss0.019-|Sample:7.75|
[TEST]
{'precision': array([0.0278483]), 'recall': array([0.06169525]), 'ndcg': array([0.05106245])}
EPOCH[521/1000] loss0.018-|Sample:7.23|
EPOCH[522/1000] loss0.019-|Sample:7.17|
EPOCH[523/1000] loss0.019-|Sample:7.56|
EPOCH[524/1000] loss0.018-|Sample:7.61|
EPOCH[525/1000] loss0.019-|Sample:7.30|
EPOCH[526/1000] loss0.019-|Sample:8.29|
EPOCH[527/1000] loss0.019-|Sample:8.00|
EPOCH[528/1000] loss0.019-|Sample:7.33|
EPOCH[529/1000] loss0.019-|Sample:7.36|
EPOCH[530/1000] loss0.019-|Sample:7.33|
[TEST]
{'precision': array([0.02788777]), 'recall': array([0.0618482]), 'ndcg': array([0.05115246])}
EPOCH[531/1000] loss0.018-|Sample:7.23|
EPOCH[532/1000] loss0.019-|Sample:7.37|
EPOCH[533/1000] loss0.018-|Sample:7.69|
EPOCH[534/1000] loss0.018-|Sample:7.51|
EPOCH[535/1000] loss0.018-|Sample:7.76|
EPOCH[536/1000] loss0.018-|Sample:7.33|
EPOCH[537/1000] loss0.018-|Sample:7.48|
EPOCH[538/1000] loss0.018-|Sample:7.42|
EPOCH[539/1000] loss0.018-|Sample:7.26|
EPOCH[540/1000] loss0.019-|Sample:7.72|
[TEST]
{'precision': array([0.0280504]), 'recall': array([0.0621834]), 'ndcg': array([0.05141664])}
EPOCH[541/1000] loss0.018-|Sample:7.48|
EPOCH[542/1000] loss0.018-|Sample:7.26|
EPOCH[543/1000] loss0.019-|Sample:7.51|
EPOCH[544/1000] loss0.018-|Sample:7.40|
EPOCH[545/1000] loss0.018-|Sample:7.36|
EPOCH[546/1000] loss0.018-|Sample:8.03|
EPOCH[547/1000] loss0.019-|Sample:7.36|
EPOCH[548/1000] loss0.018-|Sample:7.84|
EPOCH[549/1000] loss0.018-|Sample:7.36|
EPOCH[550/1000] loss0.018-|Sample:7.51|
[TEST]
{'precision': array([0.02816092]), 'recall': array([0.06256833]), 'ndcg': array([0.05144192])}
EPOCH[551/1000] loss0.018-|Sample:7.31|
EPOCH[552/1000] loss0.018-|Sample:7.58|
EPOCH[553/1000] loss0.018-|Sample:7.44|
EPOCH[554/1000] loss0.018-|Sample:7.59|
EPOCH[555/1000] loss0.018-|Sample:7.25|
EPOCH[556/1000] loss0.018-|Sample:7.36|
EPOCH[557/1000] loss0.018-|Sample:7.53|
EPOCH[558/1000] loss0.018-|Sample:7.28|
EPOCH[559/1000] loss0.018-|Sample:7.40|
EPOCH[560/1000] loss0.018-|Sample:7.36|
[TEST]
{'precision': array([0.02811987]), 'recall': array([0.06243055]), 'ndcg': array([0.05146282])}
EPOCH[561/1000] loss0.018-|Sample:7.42|
EPOCH[562/1000] loss0.018-|Sample:7.64|
EPOCH[563/1000] loss0.018-|Sample:7.51|
EPOCH[564/1000] loss0.018-|Sample:7.25|
EPOCH[565/1000] loss0.018-|Sample:7.45|
EPOCH[566/1000] loss0.018-|Sample:7.40|
EPOCH[567/1000] loss0.018-|Sample:7.44|
EPOCH[568/1000] loss0.018-|Sample:7.45|
EPOCH[569/1000] loss0.018-|Sample:7.23|
EPOCH[570/1000] loss0.018-|Sample:7.50|
[TEST]
{'precision': array([0.02820355]), 'recall': array([0.06265788]), 'ndcg': array([0.05158957])}
EPOCH[571/1000] loss0.018-|Sample:7.37|
EPOCH[572/1000] loss0.018-|Sample:7.39|
EPOCH[573/1000] loss0.018-|Sample:7.48|
EPOCH[574/1000] loss0.018-|Sample:7.39|
EPOCH[575/1000] loss0.018-|Sample:7.36|
EPOCH[576/1000] loss0.018-|Sample:7.53|
EPOCH[577/1000] loss0.019-|Sample:7.48|
EPOCH[578/1000] loss0.018-|Sample:8.01|
EPOCH[579/1000] loss0.018-|Sample:7.42|
EPOCH[580/1000] loss0.018-|Sample:7.62|
[TEST]
{'precision': array([0.02828723]), 'recall': array([0.06286068]), 'ndcg': array([0.05161921])}
EPOCH[581/1000] loss0.018-|Sample:7.56|
EPOCH[582/1000] loss0.018-|Sample:7.39|
EPOCH[583/1000] loss0.018-|Sample:7.37|
EPOCH[584/1000] loss0.018-|Sample:7.62|
EPOCH[585/1000] loss0.018-|Sample:7.33|
EPOCH[586/1000] loss0.018-|Sample:7.30|
EPOCH[587/1000] loss0.018-|Sample:7.50|
EPOCH[588/1000] loss0.018-|Sample:7.39|
EPOCH[589/1000] loss0.018-|Sample:7.51|
EPOCH[590/1000] loss0.018-|Sample:7.48|
[TEST]
{'precision': array([0.0281925]), 'recall': array([0.06260125]), 'ndcg': array([0.05152056])}
EPOCH[591/1000] loss0.018-|Sample:7.50|
EPOCH[592/1000] loss0.019-|Sample:7.34|
EPOCH[593/1000] loss0.018-|Sample:7.76|
EPOCH[594/1000] loss0.018-|Sample:7.28|
EPOCH[595/1000] loss0.018-|Sample:7.81|
EPOCH[596/1000] loss0.018-|Sample:7.25|
EPOCH[597/1000] loss0.018-|Sample:7.83|
EPOCH[598/1000] loss0.018-|Sample:7.51|
EPOCH[599/1000] loss0.018-|Sample:7.23|
EPOCH[600/1000] loss0.018-|Sample:7.98|
[TEST]
{'precision': array([0.02824776]), 'recall': array([0.06278284]), 'ndcg': array([0.05155194])}
EPOCH[601/1000] loss0.018-|Sample:7.50|
EPOCH[602/1000] loss0.018-|Sample:7.53|
EPOCH[603/1000] loss0.018-|Sample:7.28|
EPOCH[604/1000] loss0.018-|Sample:7.55|
EPOCH[605/1000] loss0.018-|Sample:7.34|
EPOCH[606/1000] loss0.018-|Sample:7.25|
EPOCH[607/1000] loss0.018-|Sample:7.80|
EPOCH[608/1000] loss0.018-|Sample:7.34|
EPOCH[609/1000] loss0.018-|Sample:8.47|
EPOCH[610/1000] loss0.018-|Sample:7.75|
[TEST]
{'precision': array([0.02843407]), 'recall': array([0.06303885]), 'ndcg': array([0.05177207])}
EPOCH[611/1000] loss0.018-|Sample:7.59|
EPOCH[612/1000] loss0.018-|Sample:7.30|
EPOCH[613/1000] loss0.018-|Sample:7.45|
EPOCH[614/1000] loss0.018-|Sample:6.81|
EPOCH[615/1000] loss0.018-|Sample:6.86|
EPOCH[616/1000] loss0.018-|Sample:6.81|
EPOCH[617/1000] loss0.018-|Sample:6.87|
EPOCH[618/1000] loss0.018-|Sample:6.83|
EPOCH[619/1000] loss0.018-|Sample:6.86|
EPOCH[620/1000] loss0.018-|Sample:6.83|
[TEST]
{'precision': array([0.02832986]), 'recall': array([0.06277848]), 'ndcg': array([0.05159736])}
EPOCH[621/1000] loss0.018-|Sample:6.81|
EPOCH[622/1000] loss0.018-|Sample:6.81|
EPOCH[623/1000] loss0.018-|Sample:6.84|
EPOCH[624/1000] loss0.018-|Sample:6.84|
EPOCH[625/1000] loss0.018-|Sample:6.87|
EPOCH[626/1000] loss0.018-|Sample:6.83|
EPOCH[627/1000] loss0.018-|Sample:6.87|
EPOCH[628/1000] loss0.018-|Sample:6.80|
EPOCH[629/1000] loss0.018-|Sample:6.81|
EPOCH[630/1000] loss0.018-|Sample:6.80|
[TEST]
{'precision': array([0.02831091]), 'recall': array([0.0628575]), 'ndcg': array([0.05164467])}
EPOCH[631/1000] loss0.018-|Sample:6.80|
EPOCH[632/1000] loss0.018-|Sample:6.84|
EPOCH[633/1000] loss0.018-|Sample:6.89|
EPOCH[634/1000] loss0.018-|Sample:6.80|
EPOCH[635/1000] loss0.018-|Sample:6.84|
EPOCH[636/1000] loss0.018-|Sample:6.83|
EPOCH[637/1000] loss0.018-|Sample:6.86|
EPOCH[638/1000] loss0.018-|Sample:6.81|
EPOCH[639/1000] loss0.018-|Sample:6.87|
EPOCH[640/1000] loss0.018-|Sample:6.83|
[TEST]
{'precision': array([0.02827934]), 'recall': array([0.06284895]), 'ndcg': array([0.05169838])}
EPOCH[641/1000] loss0.018-|Sample:6.83|
EPOCH[642/1000] loss0.018-|Sample:6.80|
EPOCH[643/1000] loss0.018-|Sample:6.87|
EPOCH[644/1000] loss0.018-|Sample:6.81|
EPOCH[645/1000] loss0.018-|Sample:6.89|
EPOCH[646/1000] loss0.018-|Sample:6.84|
EPOCH[647/1000] loss0.018-|Sample:6.83|
EPOCH[648/1000] loss0.018-|Sample:6.83|
EPOCH[649/1000] loss0.018-|Sample:6.89|
EPOCH[650/1000] loss0.018-|Sample:6.86|
[TEST]
{'precision': array([0.02829197]), 'recall': array([0.06289706]), 'ndcg': array([0.0517632])}
EPOCH[651/1000] loss0.018-|Sample:6.75|
EPOCH[652/1000] loss0.018-|Sample:6.81|
EPOCH[653/1000] loss0.018-|Sample:6.84|
EPOCH[654/1000] loss0.018-|Sample:6.78|
EPOCH[655/1000] loss0.018-|Sample:6.86|
EPOCH[656/1000] loss0.018-|Sample:6.83|
EPOCH[657/1000] loss0.018-|Sample:6.84|
EPOCH[658/1000] loss0.018-|Sample:6.84|
EPOCH[659/1000] loss0.018-|Sample:6.83|
EPOCH[660/1000] loss0.018-|Sample:6.87|
[TEST]
{'precision': array([0.02837407]), 'recall': array([0.06296591]), 'ndcg': array([0.05182053])}
EPOCH[661/1000] loss0.018-|Sample:6.75|
EPOCH[662/1000] loss0.018-|Sample:6.81|
EPOCH[663/1000] loss0.018-|Sample:6.86|
EPOCH[664/1000] loss0.018-|Sample:6.84|
EPOCH[665/1000] loss0.018-|Sample:6.86|
EPOCH[666/1000] loss0.018-|Sample:6.86|
EPOCH[667/1000] loss0.018-|Sample:6.87|
EPOCH[668/1000] loss0.018-|Sample:6.84|
EPOCH[669/1000] loss0.018-|Sample:6.89|
EPOCH[670/1000] loss0.018-|Sample:6.84|
[TEST]
{'precision': array([0.02826355]), 'recall': array([0.06278375]), 'ndcg': array([0.05173895])}
EPOCH[671/1000] loss0.018-|Sample:6.87|
EPOCH[672/1000] loss0.018-|Sample:6.81|
EPOCH[673/1000] loss0.018-|Sample:6.86|
EPOCH[674/1000] loss0.018-|Sample:6.80|
EPOCH[675/1000] loss0.018-|Sample:6.90|
EPOCH[676/1000] loss0.018-|Sample:6.80|
EPOCH[677/1000] loss0.018-|Sample:6.86|
EPOCH[678/1000] loss0.018-|Sample:6.78|
EPOCH[679/1000] loss0.018-|Sample:6.83|
EPOCH[680/1000] loss0.018-|Sample:6.83|
[TEST]
{'precision': array([0.02830933]), 'recall': array([0.06281258]), 'ndcg': array([0.05189117])}
EPOCH[681/1000] loss0.018-|Sample:6.86|
EPOCH[682/1000] loss0.018-|Sample:6.81|
EPOCH[683/1000] loss0.018-|Sample:6.83|
EPOCH[684/1000] loss0.018-|Sample:6.80|
EPOCH[685/1000] loss0.018-|Sample:6.87|
EPOCH[686/1000] loss0.018-|Sample:6.80|
EPOCH[687/1000] loss0.018-|Sample:6.84|
EPOCH[688/1000] loss0.018-|Sample:6.78|
EPOCH[689/1000] loss0.018-|Sample:6.81|
EPOCH[690/1000] loss0.018-|Sample:6.87|
[TEST]
{'precision': array([0.02835828]), 'recall': array([0.06291597]), 'ndcg': array([0.05191456])}
EPOCH[691/1000] loss0.018-|Sample:6.78|
EPOCH[692/1000] loss0.018-|Sample:6.89|
EPOCH[693/1000] loss0.018-|Sample:6.87|
EPOCH[694/1000] loss0.018-|Sample:6.81|
EPOCH[695/1000] loss0.018-|Sample:6.87|
EPOCH[696/1000] loss0.018-|Sample:6.86|
EPOCH[697/1000] loss0.018-|Sample:6.86|
EPOCH[698/1000] loss0.018-|Sample:6.83|
EPOCH[699/1000] loss0.018-|Sample:6.87|
EPOCH[700/1000] loss0.018-|Sample:6.86|
[TEST]
{'precision': array([0.02839459]), 'recall': array([0.06296448]), 'ndcg': array([0.05194238])}
EPOCH[701/1000] loss0.018-|Sample:6.86|
EPOCH[702/1000] loss0.018-|Sample:6.81|
EPOCH[703/1000] loss0.018-|Sample:6.83|
EPOCH[704/1000] loss0.018-|Sample:6.80|
EPOCH[705/1000] loss0.018-|Sample:6.89|
EPOCH[706/1000] loss0.018-|Sample:6.81|
EPOCH[707/1000] loss0.018-|Sample:6.89|
EPOCH[708/1000] loss0.018-|Sample:6.81|
EPOCH[709/1000] loss0.018-|Sample:6.87|
EPOCH[710/1000] loss0.018-|Sample:6.84|
[TEST]
{'precision': array([0.02829828]), 'recall': array([0.06289892]), 'ndcg': array([0.05187215])}
EPOCH[711/1000] loss0.018-|Sample:6.86|
EPOCH[712/1000] loss0.018-|Sample:6.86|
EPOCH[713/1000] loss0.018-|Sample:6.84|
EPOCH[714/1000] loss0.018-|Sample:6.81|
EPOCH[715/1000] loss0.018-|Sample:6.92|
EPOCH[716/1000] loss0.018-|Sample:6.81|
EPOCH[717/1000] loss0.018-|Sample:6.90|
EPOCH[718/1000] loss0.018-|Sample:6.86|
EPOCH[719/1000] loss0.018-|Sample:6.81|
EPOCH[720/1000] loss0.018-|Sample:6.86|
[TEST]
{'precision': array([0.02834723]), 'recall': array([0.06293616]), 'ndcg': array([0.05184406])}
EPOCH[721/1000] loss0.018-|Sample:6.81|
EPOCH[722/1000] loss0.018-|Sample:6.80|
EPOCH[723/1000] loss0.018-|Sample:6.84|
EPOCH[724/1000] loss0.018-|Sample:6.84|
EPOCH[725/1000] loss0.018-|Sample:6.90|
EPOCH[726/1000] loss0.018-|Sample:6.83|
EPOCH[727/1000] loss0.018-|Sample:6.87|
EPOCH[728/1000] loss0.018-|Sample:6.81|
EPOCH[729/1000] loss0.018-|Sample:6.83|
EPOCH[730/1000] loss0.018-|Sample:6.83|
[TEST]
{'precision': array([0.0283867]), 'recall': array([0.06299663]), 'ndcg': array([0.05187489])}
EPOCH[731/1000] loss0.018-|Sample:6.83|
EPOCH[732/1000] loss0.018-|Sample:6.80|
EPOCH[733/1000] loss0.018-|Sample:6.84|
EPOCH[734/1000] loss0.018-|Sample:6.83|
EPOCH[735/1000] loss0.018-|Sample:6.87|
EPOCH[736/1000] loss0.018-|Sample:6.86|
EPOCH[737/1000] loss0.018-|Sample:6.86|
EPOCH[738/1000] loss0.018-|Sample:6.78|
EPOCH[739/1000] loss0.018-|Sample:6.84|
EPOCH[740/1000] loss0.018-|Sample:6.84|
[TEST]
{'precision': array([0.02828091]), 'recall': array([0.06270623]), 'ndcg': array([0.05184643])}
EPOCH[741/1000] loss0.018-|Sample:6.78|
EPOCH[742/1000] loss0.018-|Sample:6.84|
EPOCH[743/1000] loss0.018-|Sample:6.87|
EPOCH[744/1000] loss0.018-|Sample:6.80|
EPOCH[745/1000] loss0.018-|Sample:6.94|
EPOCH[746/1000] loss0.018-|Sample:6.81|
EPOCH[747/1000] loss0.018-|Sample:6.84|
EPOCH[748/1000] loss0.018-|Sample:6.84|
EPOCH[749/1000] loss0.018-|Sample:6.84|
EPOCH[750/1000] loss0.018-|Sample:6.90|
[TEST]
{'precision': array([0.02837407]), 'recall': array([0.06309782]), 'ndcg': array([0.05188948])}
EPOCH[751/1000] loss0.018-|Sample:6.86|
EPOCH[752/1000] loss0.018-|Sample:6.84|
EPOCH[753/1000] loss0.018-|Sample:6.87|
EPOCH[754/1000] loss0.018-|Sample:6.80|
EPOCH[755/1000] loss0.018-|Sample:6.89|
EPOCH[756/1000] loss0.018-|Sample:6.84|
EPOCH[757/1000] loss0.018-|Sample:6.84|
EPOCH[758/1000] loss0.018-|Sample:6.84|
EPOCH[759/1000] loss0.018-|Sample:6.83|
EPOCH[760/1000] loss0.018-|Sample:6.84|
[TEST]
{'precision': array([0.02840249]), 'recall': array([0.06319792]), 'ndcg': array([0.05200527])}
EPOCH[761/1000] loss0.018-|Sample:6.78|
EPOCH[762/1000] loss0.018-|Sample:6.83|
EPOCH[763/1000] loss0.018-|Sample:6.83|
EPOCH[764/1000] loss0.018-|Sample:6.80|
EPOCH[765/1000] loss0.018-|Sample:6.90|
EPOCH[766/1000] loss0.018-|Sample:6.83|
EPOCH[767/1000] loss0.018-|Sample:6.84|
EPOCH[768/1000] loss0.018-|Sample:6.83|
EPOCH[769/1000] loss0.018-|Sample:6.84|
EPOCH[770/1000] loss0.018-|Sample:6.84|
[TEST]
{'precision': array([0.02833933]), 'recall': array([0.06279414]), 'ndcg': array([0.05175564])}
EPOCH[771/1000] loss0.018-|Sample:6.78|
EPOCH[772/1000] loss0.018-|Sample:6.84|
EPOCH[773/1000] loss0.018-|Sample:6.86|
EPOCH[774/1000] loss0.018-|Sample:6.83|
EPOCH[775/1000] loss0.018-|Sample:6.89|
EPOCH[776/1000] loss0.018-|Sample:6.83|
EPOCH[777/1000] loss0.018-|Sample:6.83|
EPOCH[778/1000] loss0.018-|Sample:6.80|
EPOCH[779/1000] loss0.018-|Sample:6.87|
EPOCH[780/1000] loss0.018-|Sample:6.87|
[TEST]
{'precision': array([0.02836617]), 'recall': array([0.06299089]), 'ndcg': array([0.05191796])}
EPOCH[781/1000] loss0.018-|Sample:6.83|
EPOCH[782/1000] loss0.018-|Sample:6.81|
EPOCH[783/1000] loss0.018-|Sample:6.86|
EPOCH[784/1000] loss0.018-|Sample:6.81|
EPOCH[785/1000] loss0.018-|Sample:6.87|
EPOCH[786/1000] loss0.018-|Sample:6.80|
EPOCH[787/1000] loss0.018-|Sample:6.87|
EPOCH[788/1000] loss0.018-|Sample:6.83|
EPOCH[789/1000] loss0.018-|Sample:6.89|
EPOCH[790/1000] loss0.018-|Sample:6.83|
[TEST]
{'precision': array([0.02845617]), 'recall': array([0.06331092]), 'ndcg': array([0.05206102])}
EPOCH[791/1000] loss0.018-|Sample:6.89|
EPOCH[792/1000] loss0.018-|Sample:6.80|
EPOCH[793/1000] loss0.018-|Sample:6.83|
EPOCH[794/1000] loss0.018-|Sample:6.80|
EPOCH[795/1000] loss0.018-|Sample:6.90|
EPOCH[796/1000] loss0.018-|Sample:6.78|
EPOCH[797/1000] loss0.018-|Sample:6.86|
EPOCH[798/1000] loss0.018-|Sample:6.78|
EPOCH[799/1000] loss0.018-|Sample:6.83|
EPOCH[800/1000] loss0.018-|Sample:6.86|
[TEST]
{'precision': array([0.02829986]), 'recall': array([0.06286183]), 'ndcg': array([0.05194202])}
EPOCH[801/1000] loss0.018-|Sample:6.84|
EPOCH[802/1000] loss0.018-|Sample:6.83|
EPOCH[803/1000] loss0.018-|Sample:6.87|
EPOCH[804/1000] loss0.018-|Sample:6.80|
EPOCH[805/1000] loss0.018-|Sample:6.90|
EPOCH[806/1000] loss0.018-|Sample:6.86|
EPOCH[807/1000] loss0.018-|Sample:6.84|
EPOCH[808/1000] loss0.018-|Sample:6.80|
EPOCH[809/1000] loss0.018-|Sample:6.94|
EPOCH[810/1000] loss0.018-|Sample:6.86|
[TEST]
{'precision': array([0.02828407]), 'recall': array([0.06290755]), 'ndcg': array([0.05185105])}
EPOCH[811/1000] loss0.018-|Sample:6.83|
EPOCH[812/1000] loss0.018-|Sample:6.86|
EPOCH[813/1000] loss0.018-|Sample:6.87|
EPOCH[814/1000] loss0.018-|Sample:6.80|
EPOCH[815/1000] loss0.018-|Sample:6.94|
EPOCH[816/1000] loss0.018-|Sample:6.83|
EPOCH[817/1000] loss0.018-|Sample:6.87|
EPOCH[818/1000] loss0.018-|Sample:6.80|
EPOCH[819/1000] loss0.018-|Sample:6.81|
EPOCH[820/1000] loss0.018-|Sample:6.84|
[TEST]
{'precision': array([0.02832512]), 'recall': array([0.06291169]), 'ndcg': array([0.05198565])}
EPOCH[821/1000] loss0.018-|Sample:6.87|
EPOCH[822/1000] loss0.018-|Sample:6.78|
EPOCH[823/1000] loss0.018-|Sample:6.86|
EPOCH[824/1000] loss0.018-|Sample:6.81|
EPOCH[825/1000] loss0.018-|Sample:6.81|
EPOCH[826/1000] loss0.018-|Sample:6.73|
EPOCH[827/1000] loss0.018-|Sample:6.86|
EPOCH[828/1000] loss0.018-|Sample:6.86|
EPOCH[829/1000] loss0.018-|Sample:6.86|
EPOCH[830/1000] loss0.018-|Sample:6.81|
[TEST]
{'precision': array([0.02822092]), 'recall': array([0.0626893]), 'ndcg': array([0.05182197])}
EPOCH[831/1000] loss0.018-|Sample:6.87|
EPOCH[832/1000] loss0.018-|Sample:6.83|
EPOCH[833/1000] loss0.018-|Sample:6.83|
EPOCH[834/1000] loss0.018-|Sample:6.84|
EPOCH[835/1000] loss0.018-|Sample:6.86|
EPOCH[836/1000] loss0.018-|Sample:6.80|
EPOCH[837/1000] loss0.018-|Sample:6.81|
EPOCH[838/1000] loss0.018-|Sample:6.86|
EPOCH[839/1000] loss0.018-|Sample:6.87|
EPOCH[840/1000] loss0.018-|Sample:6.86|
[TEST]
{'precision': array([0.02841986]), 'recall': array([0.0630989]), 'ndcg': array([0.05210592])}
EPOCH[841/1000] loss0.018-|Sample:6.80|
EPOCH[842/1000] loss0.018-|Sample:6.72|
EPOCH[843/1000] loss0.018-|Sample:6.84|
EPOCH[844/1000] loss0.018-|Sample:6.78|
EPOCH[845/1000] loss0.018-|Sample:6.94|
EPOCH[846/1000] loss0.018-|Sample:6.83|
EPOCH[847/1000] loss0.018-|Sample:6.80|
EPOCH[848/1000] loss0.018-|Sample:6.81|
EPOCH[849/1000] loss0.018-|Sample:6.84|
EPOCH[850/1000] loss0.018-|Sample:6.86|
[TEST]
{'precision': array([0.02834407]), 'recall': array([0.06293907]), 'ndcg': array([0.05192251])}
EPOCH[851/1000] loss0.018-|Sample:6.84|
EPOCH[852/1000] loss0.018-|Sample:6.87|
EPOCH[853/1000] loss0.018-|Sample:6.84|
EPOCH[854/1000] loss0.018-|Sample:6.83|
EPOCH[855/1000] loss0.018-|Sample:6.94|
EPOCH[856/1000] loss0.018-|Sample:6.83|
EPOCH[857/1000] loss0.018-|Sample:6.89|
EPOCH[858/1000] loss0.018-|Sample:6.89|
EPOCH[859/1000] loss0.018-|Sample:6.89|
EPOCH[860/1000] loss0.018-|Sample:6.86|
[TEST]
{'precision': array([0.02840249]), 'recall': array([0.06300512]), 'ndcg': array([0.05210948])}
EPOCH[861/1000] loss0.018-|Sample:6.84|
EPOCH[862/1000] loss0.018-|Sample:6.83|
EPOCH[863/1000] loss0.018-|Sample:6.86|
EPOCH[864/1000] loss0.018-|Sample:6.78|
EPOCH[865/1000] loss0.018-|Sample:6.90|
EPOCH[866/1000] loss0.018-|Sample:6.80|
EPOCH[867/1000] loss0.018-|Sample:6.84|
EPOCH[868/1000] loss0.018-|Sample:6.80|
EPOCH[869/1000] loss0.018-|Sample:6.81|
EPOCH[870/1000] loss0.018-|Sample:6.89|
[TEST]
{'precision': array([0.02842143]), 'recall': array([0.06292551]), 'ndcg': array([0.05198552])}
EPOCH[871/1000] loss0.018-|Sample:6.83|
EPOCH[872/1000] loss0.018-|Sample:6.83|
EPOCH[873/1000] loss0.018-|Sample:6.83|
EPOCH[874/1000] loss0.018-|Sample:6.81|
EPOCH[875/1000] loss0.018-|Sample:6.86|
EPOCH[876/1000] loss0.018-|Sample:6.84|
EPOCH[877/1000] loss0.018-|Sample:6.90|
EPOCH[878/1000] loss0.018-|Sample:6.86|
EPOCH[879/1000] loss0.018-|Sample:6.83|
EPOCH[880/1000] loss0.018-|Sample:6.86|
[TEST]
{'precision': array([0.02827776]), 'recall': array([0.06282789]), 'ndcg': array([0.05180654])}
EPOCH[881/1000] loss0.018-|Sample:6.89|
EPOCH[882/1000] loss0.018-|Sample:6.84|
EPOCH[883/1000] loss0.018-|Sample:6.84|
EPOCH[884/1000] loss0.018-|Sample:6.81|
EPOCH[885/1000] loss0.018-|Sample:6.92|
EPOCH[886/1000] loss0.018-|Sample:6.83|
EPOCH[887/1000] loss0.018-|Sample:6.87|
EPOCH[888/1000] loss0.018-|Sample:6.81|
EPOCH[889/1000] loss0.018-|Sample:6.84|
EPOCH[890/1000] loss0.018-|Sample:6.81|
[TEST]
{'precision': array([0.02841038]), 'recall': array([0.06310155]), 'ndcg': array([0.05197574])}
EPOCH[891/1000] loss0.018-|Sample:6.89|
EPOCH[892/1000] loss0.018-|Sample:6.83|
EPOCH[893/1000] loss0.018-|Sample:6.83|
EPOCH[894/1000] loss0.018-|Sample:6.83|
EPOCH[895/1000] loss0.018-|Sample:6.89|
EPOCH[896/1000] loss0.018-|Sample:6.84|
EPOCH[897/1000] loss0.018-|Sample:6.83|
EPOCH[898/1000] loss0.018-|Sample:6.84|
EPOCH[899/1000] loss0.018-|Sample:6.84|
EPOCH[900/1000] loss0.018-|Sample:6.83|
[TEST]
{'precision': array([0.0285209]), 'recall': array([0.06332145]), 'ndcg': array([0.05219384])}
EPOCH[901/1000] loss0.018-|Sample:6.78|
EPOCH[902/1000] loss0.018-|Sample:6.84|
EPOCH[903/1000] loss0.018-|Sample:6.89|
EPOCH[904/1000] loss0.018-|Sample:6.81|
EPOCH[905/1000] loss0.018-|Sample:6.90|
EPOCH[906/1000] loss0.018-|Sample:6.83|
EPOCH[907/1000] loss0.018-|Sample:6.84|
EPOCH[908/1000] loss0.018-|Sample:6.83|
EPOCH[909/1000] loss0.018-|Sample:6.80|
EPOCH[910/1000] loss0.018-|Sample:6.86|
[TEST]
{'precision': array([0.02847985]), 'recall': array([0.06326345]), 'ndcg': array([0.05214152])}
EPOCH[911/1000] loss0.018-|Sample:6.86|
EPOCH[912/1000] loss0.018-|Sample:6.78|
EPOCH[913/1000] loss0.018-|Sample:6.86|
EPOCH[914/1000] loss0.018-|Sample:6.78|
EPOCH[915/1000] loss0.018-|Sample:6.87|
EPOCH[916/1000] loss0.018-|Sample:6.83|
EPOCH[917/1000] loss0.018-|Sample:6.90|
EPOCH[918/1000] loss0.018-|Sample:6.78|
EPOCH[919/1000] loss0.018-|Sample:6.84|
EPOCH[920/1000] loss0.018-|Sample:6.87|
[TEST]
{'precision': array([0.02860616]), 'recall': array([0.0634444]), 'ndcg': array([0.05227618])}
EPOCH[921/1000] loss0.018-|Sample:6.90|
EPOCH[922/1000] loss0.018-|Sample:6.83|
EPOCH[923/1000] loss0.018-|Sample:6.87|
EPOCH[924/1000] loss0.018-|Sample:6.87|
EPOCH[925/1000] loss0.018-|Sample:6.87|
EPOCH[926/1000] loss0.018-|Sample:6.86|
EPOCH[927/1000] loss0.018-|Sample:6.84|
EPOCH[928/1000] loss0.018-|Sample:6.83|
EPOCH[929/1000] loss0.018-|Sample:6.83|
EPOCH[930/1000] loss0.018-|Sample:6.89|
[TEST]
{'precision': array([0.0284767]), 'recall': array([0.06314537]), 'ndcg': array([0.0521528])}
EPOCH[931/1000] loss0.018-|Sample:6.83|
EPOCH[932/1000] loss0.018-|Sample:6.78|
EPOCH[933/1000] loss0.018-|Sample:6.86|
EPOCH[934/1000] loss0.018-|Sample:6.80|
EPOCH[935/1000] loss0.018-|Sample:6.98|
EPOCH[936/1000] loss0.018-|Sample:6.84|
EPOCH[937/1000] loss0.018-|Sample:6.87|
EPOCH[938/1000] loss0.018-|Sample:6.81|
EPOCH[939/1000] loss0.018-|Sample:6.84|
EPOCH[940/1000] loss0.018-|Sample:6.86|
[TEST]
{'precision': array([0.0283867]), 'recall': array([0.062913]), 'ndcg': array([0.05198806])}
EPOCH[941/1000] loss0.018-|Sample:6.81|
EPOCH[942/1000] loss0.018-|Sample:6.78|
EPOCH[943/1000] loss0.018-|Sample:6.81|
EPOCH[944/1000] loss0.018-|Sample:6.80|
EPOCH[945/1000] loss0.018-|Sample:6.89|
EPOCH[946/1000] loss0.018-|Sample:6.80|
EPOCH[947/1000] loss0.018-|Sample:6.86|
EPOCH[948/1000] loss0.018-|Sample:6.86|
EPOCH[949/1000] loss0.018-|Sample:6.90|
EPOCH[950/1000] loss0.018-|Sample:6.86|
[TEST]
{'precision': array([0.02856353]), 'recall': array([0.06348615]), 'ndcg': array([0.05232606])}
EPOCH[951/1000] loss0.018-|Sample:6.80|
EPOCH[952/1000] loss0.018-|Sample:6.83|
EPOCH[953/1000] loss0.018-|Sample:6.83|
EPOCH[954/1000] loss0.018-|Sample:6.70|
EPOCH[955/1000] loss0.018-|Sample:6.87|
EPOCH[956/1000] loss0.018-|Sample:6.83|
EPOCH[957/1000] loss0.018-|Sample:6.87|
EPOCH[958/1000] loss0.018-|Sample:6.84|
EPOCH[959/1000] loss0.018-|Sample:6.86|
EPOCH[960/1000] loss0.018-|Sample:6.83|
[TEST]
{'precision': array([0.02853669]), 'recall': array([0.06348289]), 'ndcg': array([0.05231094])}
EPOCH[961/1000] loss0.018-|Sample:6.83|
EPOCH[962/1000] loss0.018-|Sample:6.83|
EPOCH[963/1000] loss0.018-|Sample:6.86|
EPOCH[964/1000] loss0.018-|Sample:6.84|
EPOCH[965/1000] loss0.018-|Sample:6.89|
EPOCH[966/1000] loss0.018-|Sample:6.84|
EPOCH[967/1000] loss0.018-|Sample:6.81|
EPOCH[968/1000] loss0.018-|Sample:6.78|
EPOCH[969/1000] loss0.018-|Sample:6.84|
EPOCH[970/1000] loss0.018-|Sample:6.89|
[TEST]
{'precision': array([0.02849722]), 'recall': array([0.06351496]), 'ndcg': array([0.05224342])}
EPOCH[971/1000] loss0.018-|Sample:6.86|
EPOCH[972/1000] loss0.018-|Sample:6.81|
EPOCH[973/1000] loss0.018-|Sample:6.89|
EPOCH[974/1000] loss0.018-|Sample:6.76|
EPOCH[975/1000] loss0.018-|Sample:6.90|
EPOCH[976/1000] loss0.018-|Sample:6.81|
EPOCH[977/1000] loss0.018-|Sample:6.87|
EPOCH[978/1000] loss0.018-|Sample:6.83|
EPOCH[979/1000] loss0.018-|Sample:6.84|
EPOCH[980/1000] loss0.018-|Sample:6.84|
[TEST]
{'precision': array([0.02840565]), 'recall': array([0.06314175]), 'ndcg': array([0.05199668])}
EPOCH[981/1000] loss0.018-|Sample:6.81|
EPOCH[982/1000] loss0.018-|Sample:6.81|
EPOCH[983/1000] loss0.018-|Sample:6.81|
EPOCH[984/1000] loss0.018-|Sample:6.86|
EPOCH[985/1000] loss0.018-|Sample:6.90|
EPOCH[986/1000] loss0.018-|Sample:6.83|
EPOCH[987/1000] loss0.018-|Sample:6.86|
EPOCH[988/1000] loss0.018-|Sample:6.87|
EPOCH[989/1000] loss0.018-|Sample:6.87|
EPOCH[990/1000] loss0.018-|Sample:6.84|
[TEST]
{'precision': array([0.02833302]), 'recall': array([0.0631701]), 'ndcg': array([0.05200913])}
EPOCH[991/1000] loss0.018-|Sample:6.84|
EPOCH[992/1000] loss0.018-|Sample:6.84|
EPOCH[993/1000] loss0.018-|Sample:6.89|
EPOCH[994/1000] loss0.018-|Sample:6.80|
EPOCH[995/1000] loss0.018-|Sample:6.90|
EPOCH[996/1000] loss0.018-|Sample:6.83|
EPOCH[997/1000] loss0.018-|Sample:6.87|
EPOCH[998/1000] loss0.018-|Sample:6.84|
EPOCH[999/1000] loss0.018-|Sample:6.89|
EPOCH[1000/1000] loss0.018-|Sample:6.86|

Process finished with exit code 0


New Computer model=MF
D:\ProgramFiles\Anaconda3\envs\image_caption_python36\python.exe D:/workspace/LightGcn/LightGCN-PyTorch-master/code/main.py
Cpp extension not loaded
>>SEED: 2020
loading [../data/yelp2018]
1237259 interactions for training
324147 interactions for testing
yelp2018 Sparsity : 0.0012958757851778647
yelp2018 is ready to go
===========config================
{'A_n_fold': 100,
 'A_split': False,
 'bigdata': False,
 'bpr_batch_size': 2048,
 'decay': 0.0001,
 'dropout': 0,
 'keep_prob': 0.6,
 'latent_dim_rec': 64,
 'lightGCN_n_layers': 3,
 'lr': 0.001,
 'multicore': 0,
 'pretrain': 0,
 'test_u_batch_size': 100}
cores for test: 6
comment: lgn
tensorboard: 1
LOAD: 0
Weight path: ./checkpoints
Test Topks: [20]
using bpr loss
===========end===================
using Normal distribution N(0,1) initialization for PureMF
load and save to /home/qhc/下载/LightGCN-PyTorch-master\code\checkpoints\mf-yelp2018-64.pth.tar
[TEST]
{'precision': array([0.00046261]), 'recall': array([0.00093365]), 'ndcg': array([0.00069569])}
EPOCH[1/1000] loss4.417-|Sample:8.29|
EPOCH[2/1000] loss4.133-|Sample:9.40|
EPOCH[3/1000] loss3.849-|Sample:9.50|
EPOCH[4/1000] loss3.587-|Sample:9.67|
EPOCH[5/1000] loss3.357-|Sample:8.84|
EPOCH[6/1000] loss3.122-|Sample:8.36|
EPOCH[7/1000] loss2.933-|Sample:8.47|
EPOCH[8/1000] loss2.753-|Sample:8.64|
EPOCH[9/1000] loss2.570-|Sample:8.17|
EPOCH[10/1000] loss2.411-|Sample:8.29|
[TEST]
{'precision': array([0.00040419]), 'recall': array([0.00078917]), 'ndcg': array([0.00063329])}
EPOCH[11/1000] loss2.259-|Sample:7.86|
EPOCH[12/1000] loss2.124-|Sample:8.50|
EPOCH[13/1000] loss1.993-|Sample:8.62|
EPOCH[14/1000] loss1.877-|Sample:8.14|
EPOCH[15/1000] loss1.765-|Sample:7.86|
EPOCH[16/1000] loss1.661-|Sample:8.09|
EPOCH[17/1000] loss1.559-|Sample:8.17|
EPOCH[18/1000] loss1.468-|Sample:8.62|
EPOCH[19/1000] loss1.380-|Sample:8.11|
EPOCH[20/1000] loss1.299-|Sample:8.23|
[TEST]
{'precision': array([0.00049419]), 'recall': array([0.00104416]), 'ndcg': array([0.00075064])}
EPOCH[21/1000] loss1.226-|Sample:8.20|
EPOCH[22/1000] loss1.152-|Sample:7.92|
EPOCH[23/1000] loss1.086-|Sample:8.03|
EPOCH[24/1000] loss1.022-|Sample:8.29|
EPOCH[25/1000] loss0.963-|Sample:8.44|
EPOCH[26/1000] loss0.901-|Sample:8.50|
EPOCH[27/1000] loss0.847-|Sample:8.31|
EPOCH[28/1000] loss0.794-|Sample:8.09|
EPOCH[29/1000] loss0.746-|Sample:8.23|
EPOCH[30/1000] loss0.700-|Sample:8.04|
[TEST]
{'precision': array([0.00098206]), 'recall': array([0.00222329]), 'ndcg': array([0.00158718])}
EPOCH[31/1000] loss0.653-|Sample:8.33|
EPOCH[32/1000] loss0.615-|Sample:8.22|
EPOCH[33/1000] loss0.575-|Sample:8.26|
EPOCH[34/1000] loss0.535-|Sample:8.00|
EPOCH[35/1000] loss0.501-|Sample:8.00|
EPOCH[36/1000] loss0.469-|Sample:7.70|
EPOCH[37/1000] loss0.440-|Sample:7.80|
EPOCH[38/1000] loss0.407-|Sample:7.86|
EPOCH[39/1000] loss0.381-|Sample:7.69|
EPOCH[40/1000] loss0.355-|Sample:7.62|
[TEST]
{'precision': array([0.00274094]), 'recall': array([0.00569862]), 'ndcg': array([0.0043493])}
EPOCH[41/1000] loss0.332-|Sample:8.54|
EPOCH[42/1000] loss0.309-|Sample:8.25|
EPOCH[43/1000] loss0.291-|Sample:8.19|
EPOCH[44/1000] loss0.271-|Sample:8.20|
EPOCH[45/1000] loss0.255-|Sample:7.90|
EPOCH[46/1000] loss0.239-|Sample:8.29|
EPOCH[47/1000] loss0.224-|Sample:8.09|
EPOCH[48/1000] loss0.211-|Sample:8.42|
EPOCH[49/1000] loss0.196-|Sample:8.22|
EPOCH[50/1000] loss0.185-|Sample:8.14|
[TEST]
{'precision': array([0.00506979]), 'recall': array([0.00959131]), 'ndcg': array([0.00752472])}
EPOCH[51/1000] loss0.175-|Sample:8.31|
EPOCH[52/1000] loss0.165-|Sample:8.37|
EPOCH[53/1000] loss0.156-|Sample:8.34|
EPOCH[54/1000] loss0.147-|Sample:8.09|
EPOCH[55/1000] loss0.140-|Sample:8.04|
EPOCH[56/1000] loss0.131-|Sample:8.06|
EPOCH[57/1000] loss0.126-|Sample:8.25|
EPOCH[58/1000] loss0.120-|Sample:8.26|
EPOCH[59/1000] loss0.115-|Sample:8.15|
EPOCH[60/1000] loss0.109-|Sample:8.29|
[TEST]
{'precision': array([0.00661235]), 'recall': array([0.01199274]), 'ndcg': array([0.00981579])}
EPOCH[61/1000] loss0.104-|Sample:8.08|
EPOCH[62/1000] loss0.100-|Sample:8.14|
EPOCH[63/1000] loss0.096-|Sample:8.54|
EPOCH[64/1000] loss0.093-|Sample:7.83|
EPOCH[65/1000] loss0.089-|Sample:8.47|
EPOCH[66/1000] loss0.085-|Sample:8.19|
EPOCH[67/1000] loss0.082-|Sample:8.17|
EPOCH[68/1000] loss0.080-|Sample:8.29|
EPOCH[69/1000] loss0.077-|Sample:8.25|
EPOCH[70/1000] loss0.074-|Sample:8.12|
[TEST]
{'precision': array([0.00758179]), 'recall': array([0.01365966]), 'ndcg': array([0.01120587])}
EPOCH[71/1000] loss0.072-|Sample:8.29|
EPOCH[72/1000] loss0.070-|Sample:8.08|
EPOCH[73/1000] loss0.068-|Sample:8.08|
EPOCH[74/1000] loss0.066-|Sample:8.37|
EPOCH[75/1000] loss0.064-|Sample:8.37|
EPOCH[76/1000] loss0.061-|Sample:7.94|
EPOCH[77/1000] loss0.061-|Sample:8.14|
EPOCH[78/1000] loss0.060-|Sample:8.17|
EPOCH[79/1000] loss0.058-|Sample:8.36|
EPOCH[80/1000] loss0.057-|Sample:8.26|
[TEST]
{'precision': array([0.00812018]), 'recall': array([0.01481247]), 'ndcg': array([0.01204624])}
EPOCH[81/1000] loss0.055-|Sample:8.47|
EPOCH[82/1000] loss0.054-|Sample:8.15|
EPOCH[83/1000] loss0.053-|Sample:8.37|
EPOCH[84/1000] loss0.052-|Sample:8.34|
EPOCH[85/1000] loss0.050-|Sample:8.09|
EPOCH[86/1000] loss0.050-|Sample:8.40|
EPOCH[87/1000] loss0.049-|Sample:8.15|
EPOCH[88/1000] loss0.048-|Sample:8.22|
EPOCH[89/1000] loss0.047-|Sample:8.29|
EPOCH[90/1000] loss0.046-|Sample:8.51|
[TEST]
{'precision': array([0.00866016]), 'recall': array([0.01591401]), 'ndcg': array([0.01298185])}
EPOCH[91/1000] loss0.045-|Sample:8.03|
EPOCH[92/1000] loss0.044-|Sample:8.20|
EPOCH[93/1000] loss0.044-|Sample:8.09|
EPOCH[94/1000] loss0.043-|Sample:8.09|
EPOCH[95/1000] loss0.042-|Sample:8.23|
EPOCH[96/1000] loss0.042-|Sample:8.25|
EPOCH[97/1000] loss0.041-|Sample:8.17|
EPOCH[98/1000] loss0.041-|Sample:7.86|
EPOCH[99/1000] loss0.040-|Sample:8.31|
EPOCH[100/1000] loss0.040-|Sample:8.37|
[TEST]
{'precision': array([0.00901541]), 'recall': array([0.01665986]), 'ndcg': array([0.01357126])}
EPOCH[101/1000] loss0.039-|Sample:8.09|
EPOCH[102/1000] loss0.039-|Sample:8.48|
EPOCH[103/1000] loss0.039-|Sample:8.17|
EPOCH[104/1000] loss0.038-|Sample:8.20|
EPOCH[105/1000] loss0.038-|Sample:8.29|
EPOCH[106/1000] loss0.037-|Sample:8.25|
EPOCH[107/1000] loss0.036-|Sample:8.26|
EPOCH[108/1000] loss0.036-|Sample:8.19|
EPOCH[109/1000] loss0.036-|Sample:8.36|
EPOCH[110/1000] loss0.035-|Sample:8.14|
[TEST]
{'precision': array([0.00920172]), 'recall': array([0.01717968]), 'ndcg': array([0.01378281])}
EPOCH[111/1000] loss0.034-|Sample:8.26|
EPOCH[112/1000] loss0.035-|Sample:8.08|
EPOCH[113/1000] loss0.035-|Sample:8.40|
EPOCH[114/1000] loss0.034-|Sample:8.31|
EPOCH[115/1000] loss0.034-|Sample:8.22|
EPOCH[116/1000] loss0.034-|Sample:8.19|
EPOCH[117/1000] loss0.034-|Sample:7.84|
EPOCH[118/1000] loss0.033-|Sample:8.29|
EPOCH[119/1000] loss0.033-|Sample:7.98|
EPOCH[120/1000] loss0.032-|Sample:8.45|
[TEST]
{'precision': array([0.00943381]), 'recall': array([0.01776652]), 'ndcg': array([0.01425895])}
EPOCH[121/1000] loss0.032-|Sample:8.19|
EPOCH[122/1000] loss0.032-|Sample:8.19|
EPOCH[123/1000] loss0.032-|Sample:8.51|
EPOCH[124/1000] loss0.032-|Sample:8.14|
EPOCH[125/1000] loss0.031-|Sample:8.65|
EPOCH[126/1000] loss0.031-|Sample:8.39|
EPOCH[127/1000] loss0.030-|Sample:8.04|
EPOCH[128/1000] loss0.030-|Sample:8.37|
EPOCH[129/1000] loss0.030-|Sample:8.15|
EPOCH[130/1000] loss0.030-|Sample:8.33|
[TEST]
{'precision': array([0.00970538]), 'recall': array([0.01852007]), 'ndcg': array([0.01475733])}
EPOCH[131/1000] loss0.030-|Sample:8.31|
EPOCH[132/1000] loss0.029-|Sample:8.11|
EPOCH[133/1000] loss0.029-|Sample:8.26|
EPOCH[134/1000] loss0.029-|Sample:8.14|
EPOCH[135/1000] loss0.028-|Sample:8.59|
EPOCH[136/1000] loss0.028-|Sample:8.22|
EPOCH[137/1000] loss0.028-|Sample:8.19|
EPOCH[138/1000] loss0.028-|Sample:8.05|
EPOCH[139/1000] loss0.028-|Sample:8.14|
EPOCH[140/1000] loss0.027-|Sample:7.90|
[TEST]
{'precision': array([0.00991379]), 'recall': array([0.01888087]), 'ndcg': array([0.01514809])}
EPOCH[141/1000] loss0.027-|Sample:8.44|
EPOCH[142/1000] loss0.027-|Sample:8.20|
EPOCH[143/1000] loss0.027-|Sample:8.06|
EPOCH[144/1000] loss0.027-|Sample:7.92|
EPOCH[145/1000] loss0.027-|Sample:8.29|
EPOCH[146/1000] loss0.026-|Sample:8.09|
EPOCH[147/1000] loss0.027-|Sample:8.44|
EPOCH[148/1000] loss0.026-|Sample:8.36|
EPOCH[149/1000] loss0.026-|Sample:8.62|
EPOCH[150/1000] loss0.026-|Sample:8.47|
[TEST]
{'precision': array([0.010078]), 'recall': array([0.01940719]), 'ndcg': array([0.01545978])}
EPOCH[151/1000] loss0.026-|Sample:7.95|
EPOCH[152/1000] loss0.026-|Sample:8.04|
EPOCH[153/1000] loss0.025-|Sample:8.04|
EPOCH[154/1000] loss0.025-|Sample:7.80|
EPOCH[155/1000] loss0.025-|Sample:8.51|
EPOCH[156/1000] loss0.025-|Sample:8.42|
EPOCH[157/1000] loss0.025-|Sample:8.06|
EPOCH[158/1000] loss0.025-|Sample:7.84|
EPOCH[159/1000] loss0.025-|Sample:7.76|
EPOCH[160/1000] loss0.024-|Sample:8.28|
[TEST]
{'precision': array([0.01025799]), 'recall': array([0.01993754]), 'ndcg': array([0.01582167])}
EPOCH[161/1000] loss0.024-|Sample:8.03|
EPOCH[162/1000] loss0.024-|Sample:7.94|
EPOCH[163/1000] loss0.024-|Sample:8.72|
EPOCH[164/1000] loss0.024-|Sample:7.94|
EPOCH[165/1000] loss0.024-|Sample:8.73|
EPOCH[166/1000] loss0.024-|Sample:8.64|
EPOCH[167/1000] loss0.023-|Sample:8.08|
EPOCH[168/1000] loss0.024-|Sample:7.84|
EPOCH[169/1000] loss0.023-|Sample:7.83|
EPOCH[170/1000] loss0.023-|Sample:8.37|
[TEST]
{'precision': array([0.01073955]), 'recall': array([0.02106048]), 'ndcg': array([0.01684715])}
EPOCH[171/1000] loss0.023-|Sample:7.90|
EPOCH[172/1000] loss0.023-|Sample:9.06|
EPOCH[173/1000] loss0.023-|Sample:8.51|
EPOCH[174/1000] loss0.023-|Sample:8.11|
EPOCH[175/1000] loss0.023-|Sample:7.87|
EPOCH[176/1000] loss0.022-|Sample:8.36|
EPOCH[177/1000] loss0.022-|Sample:7.94|
EPOCH[178/1000] loss0.022-|Sample:7.83|
EPOCH[179/1000] loss0.022-|Sample:8.15|
EPOCH[180/1000] loss0.022-|Sample:7.75|
[TEST]
{'precision': array([0.01088165]), 'recall': array([0.0214506]), 'ndcg': array([0.01690104])}
EPOCH[181/1000] loss0.022-|Sample:8.11|
EPOCH[182/1000] loss0.022-|Sample:7.87|
EPOCH[183/1000] loss0.022-|Sample:8.69|
EPOCH[184/1000] loss0.021-|Sample:8.89|
EPOCH[185/1000] loss0.022-|Sample:8.67|
EPOCH[186/1000] loss0.021-|Sample:8.48|
EPOCH[187/1000] loss0.021-|Sample:8.53|
EPOCH[188/1000] loss0.022-|Sample:8.48|
EPOCH[189/1000] loss0.021-|Sample:8.56|
EPOCH[190/1000] loss0.021-|Sample:8.37|
[TEST]
{'precision': array([0.01108216]), 'recall': array([0.02198164]), 'ndcg': array([0.01753166])}
EPOCH[191/1000] loss0.021-|Sample:8.69|
EPOCH[192/1000] loss0.021-|Sample:8.15|
EPOCH[193/1000] loss0.021-|Sample:8.53|
EPOCH[194/1000] loss0.021-|Sample:8.25|
EPOCH[195/1000] loss0.021-|Sample:8.87|
EPOCH[196/1000] loss0.021-|Sample:8.76|
EPOCH[197/1000] loss0.021-|Sample:8.59|
EPOCH[198/1000] loss0.021-|Sample:8.29|
EPOCH[199/1000] loss0.020-|Sample:8.62|
EPOCH[200/1000] loss0.020-|Sample:9.19|
[TEST]
{'precision': array([0.01127321]), 'recall': array([0.02248707]), 'ndcg': array([0.01783354])}
EPOCH[201/1000] loss0.020-|Sample:8.72|
EPOCH[202/1000] loss0.020-|Sample:8.75|
EPOCH[203/1000] loss0.020-|Sample:8.47|
EPOCH[204/1000] loss0.020-|Sample:8.26|
EPOCH[205/1000] loss0.020-|Sample:7.30|
EPOCH[206/1000] loss0.020-|Sample:7.59|
EPOCH[207/1000] loss0.020-|Sample:7.23|
EPOCH[208/1000] loss0.020-|Sample:7.31|
EPOCH[209/1000] loss0.020-|Sample:7.25|
EPOCH[210/1000] loss0.020-|Sample:7.12|
[TEST]
{'precision': array([0.01147689]), 'recall': array([0.02301659]), 'ndcg': array([0.01830193])}
EPOCH[211/1000] loss0.020-|Sample:7.30|
EPOCH[212/1000] loss0.019-|Sample:7.23|
EPOCH[213/1000] loss0.019-|Sample:7.45|
EPOCH[214/1000] loss0.019-|Sample:7.42|
EPOCH[215/1000] loss0.019-|Sample:7.53|
EPOCH[216/1000] loss0.019-|Sample:7.36|
EPOCH[217/1000] loss0.019-|Sample:7.25|
EPOCH[218/1000] loss0.019-|Sample:7.78|
EPOCH[219/1000] loss0.019-|Sample:7.33|
EPOCH[220/1000] loss0.019-|Sample:7.31|
[TEST]
{'precision': array([0.01174687]), 'recall': array([0.02355844]), 'ndcg': array([0.01871812])}
EPOCH[221/1000] loss0.019-|Sample:7.37|
EPOCH[222/1000] loss0.019-|Sample:7.20|
EPOCH[223/1000] loss0.018-|Sample:7.23|
EPOCH[224/1000] loss0.019-|Sample:7.51|
EPOCH[225/1000] loss0.018-|Sample:7.25|
EPOCH[226/1000] loss0.018-|Sample:7.55|
EPOCH[227/1000] loss0.018-|Sample:7.25|
EPOCH[228/1000] loss0.018-|Sample:7.59|
EPOCH[229/1000] loss0.018-|Sample:7.22|
EPOCH[230/1000] loss0.018-|Sample:7.31|
[TEST]
{'precision': array([0.01200107]), 'recall': array([0.02420736]), 'ndcg': array([0.0192666])}
EPOCH[231/1000] loss0.018-|Sample:7.62|
EPOCH[232/1000] loss0.018-|Sample:7.31|
EPOCH[233/1000] loss0.018-|Sample:7.59|
EPOCH[234/1000] loss0.018-|Sample:7.17|
EPOCH[235/1000] loss0.018-|Sample:7.26|
EPOCH[236/1000] loss0.018-|Sample:7.19|
EPOCH[237/1000] loss0.018-|Sample:7.19|
EPOCH[238/1000] loss0.018-|Sample:7.50|
EPOCH[239/1000] loss0.018-|Sample:7.87|
EPOCH[240/1000] loss0.017-|Sample:7.53|
[TEST]
{'precision': array([0.01209107]), 'recall': array([0.02448243]), 'ndcg': array([0.01947268])}
EPOCH[241/1000] loss0.017-|Sample:7.28|
EPOCH[242/1000] loss0.017-|Sample:7.30|
EPOCH[243/1000] loss0.018-|Sample:7.25|
EPOCH[244/1000] loss0.018-|Sample:7.20|
EPOCH[245/1000] loss0.017-|Sample:7.86|
EPOCH[246/1000] loss0.017-|Sample:7.23|
EPOCH[247/1000] loss0.017-|Sample:7.28|
EPOCH[248/1000] loss0.017-|Sample:7.53|
EPOCH[249/1000] loss0.017-|Sample:7.20|
EPOCH[250/1000] loss0.017-|Sample:7.69|
[TEST]
{'precision': array([0.01251263]), 'recall': array([0.025495]), 'ndcg': array([0.02044247])}
EPOCH[251/1000] loss0.017-|Sample:7.22|
EPOCH[252/1000] loss0.017-|Sample:7.87|
EPOCH[253/1000] loss0.017-|Sample:7.19|
EPOCH[254/1000] loss0.017-|Sample:7.19|
EPOCH[255/1000] loss0.017-|Sample:7.48|
EPOCH[256/1000] loss0.017-|Sample:7.12|
EPOCH[257/1000] loss0.017-|Sample:7.19|
EPOCH[258/1000] loss0.017-|Sample:7.86|
EPOCH[259/1000] loss0.016-|Sample:7.22|
EPOCH[260/1000] loss0.017-|Sample:7.22|
[TEST]
{'precision': array([0.01261526]), 'recall': array([0.02591291]), 'ndcg': array([0.02066507])}
EPOCH[261/1000] loss0.016-|Sample:7.48|
EPOCH[262/1000] loss0.017-|Sample:7.20|
EPOCH[263/1000] loss0.016-|Sample:7.37|
EPOCH[264/1000] loss0.016-|Sample:7.20|
EPOCH[265/1000] loss0.016-|Sample:7.28|
EPOCH[266/1000] loss0.016-|Sample:7.26|
EPOCH[267/1000] loss0.016-|Sample:7.25|
EPOCH[268/1000] loss0.016-|Sample:7.34|
EPOCH[269/1000] loss0.016-|Sample:7.33|
EPOCH[270/1000] loss0.016-|Sample:7.83|
[TEST]
{'precision': array([0.01283788]), 'recall': array([0.02635391]), 'ndcg': array([0.02110253])}
EPOCH[271/1000] loss0.016-|Sample:7.20|
EPOCH[272/1000] loss0.016-|Sample:7.23|
EPOCH[273/1000] loss0.016-|Sample:7.22|
EPOCH[274/1000] loss0.016-|Sample:7.30|
EPOCH[275/1000] loss0.016-|Sample:7.30|
EPOCH[276/1000] loss0.016-|Sample:7.92|
EPOCH[277/1000] loss0.016-|Sample:7.31|
EPOCH[278/1000] loss0.016-|Sample:7.50|
EPOCH[279/1000] loss0.016-|Sample:7.22|
EPOCH[280/1000] loss0.016-|Sample:7.25|
[TEST]
{'precision': array([0.01317734]), 'recall': array([0.02708746]), 'ndcg': array([0.0216004])}
EPOCH[281/1000] loss0.016-|Sample:7.33|
EPOCH[282/1000] loss0.015-|Sample:7.26|
EPOCH[283/1000] loss0.016-|Sample:7.15|
EPOCH[284/1000] loss0.015-|Sample:7.23|
EPOCH[285/1000] loss0.015-|Sample:7.30|
EPOCH[286/1000] loss0.015-|Sample:7.58|
EPOCH[287/1000] loss0.015-|Sample:7.20|
EPOCH[288/1000] loss0.015-|Sample:7.75|
EPOCH[289/1000] loss0.015-|Sample:7.44|
EPOCH[290/1000] loss0.015-|Sample:7.31|
[TEST]
{'precision': array([0.01343154]), 'recall': array([0.02780225]), 'ndcg': array([0.02235762])}
EPOCH[291/1000] loss0.015-|Sample:7.17|
EPOCH[292/1000] loss0.015-|Sample:7.23|
EPOCH[293/1000] loss0.015-|Sample:7.31|
EPOCH[294/1000] loss0.015-|Sample:7.22|
EPOCH[295/1000] loss0.015-|Sample:7.86|
EPOCH[296/1000] loss0.015-|Sample:7.33|
EPOCH[297/1000] loss0.015-|Sample:7.31|
EPOCH[298/1000] loss0.015-|Sample:7.17|
EPOCH[299/1000] loss0.015-|Sample:7.40|
EPOCH[300/1000] loss0.015-|Sample:7.31|
[TEST]
{'precision': array([0.01352154]), 'recall': array([0.0281314]), 'ndcg': array([0.02256877])}
EPOCH[301/1000] loss0.015-|Sample:7.47|
EPOCH[302/1000] loss0.015-|Sample:7.28|
EPOCH[303/1000] loss0.015-|Sample:7.31|
EPOCH[304/1000] loss0.015-|Sample:7.64|
EPOCH[305/1000] loss0.015-|Sample:7.26|
EPOCH[306/1000] loss0.015-|Sample:7.51|
EPOCH[307/1000] loss0.015-|Sample:7.22|
EPOCH[308/1000] loss0.015-|Sample:7.22|
EPOCH[309/1000] loss0.014-|Sample:7.17|
EPOCH[310/1000] loss0.015-|Sample:7.25|
[TEST]
{'precision': array([0.01382152]), 'recall': array([0.02877015]), 'ndcg': array([0.02319658])}
EPOCH[311/1000] loss0.014-|Sample:7.20|
EPOCH[312/1000] loss0.015-|Sample:7.19|
EPOCH[313/1000] loss0.015-|Sample:8.00|
EPOCH[314/1000] loss0.014-|Sample:7.23|
EPOCH[315/1000] loss0.014-|Sample:7.25|
EPOCH[316/1000] loss0.014-|Sample:7.25|
EPOCH[317/1000] loss0.014-|Sample:7.53|
EPOCH[318/1000] loss0.014-|Sample:7.36|
EPOCH[319/1000] loss0.014-|Sample:7.11|
EPOCH[320/1000] loss0.014-|Sample:7.45|
[TEST]
{'precision': array([0.01402046]), 'recall': array([0.02918464]), 'ndcg': array([0.0235553])}
EPOCH[321/1000] loss0.014-|Sample:7.28|
EPOCH[322/1000] loss0.014-|Sample:7.51|
EPOCH[323/1000] loss0.014-|Sample:7.14|
EPOCH[324/1000] loss0.014-|Sample:7.17|
EPOCH[325/1000] loss0.014-|Sample:7.17|
EPOCH[326/1000] loss0.014-|Sample:7.26|
EPOCH[327/1000] loss0.014-|Sample:7.30|
EPOCH[328/1000] loss0.014-|Sample:7.33|
EPOCH[329/1000] loss0.014-|Sample:7.20|
EPOCH[330/1000] loss0.014-|Sample:7.87|
[TEST]
{'precision': array([0.01407099]), 'recall': array([0.02948617]), 'ndcg': array([0.0238492])}
EPOCH[331/1000] loss0.014-|Sample:7.31|
EPOCH[332/1000] loss0.014-|Sample:7.22|
EPOCH[333/1000] loss0.014-|Sample:7.44|
EPOCH[334/1000] loss0.014-|Sample:7.20|
EPOCH[335/1000] loss0.014-|Sample:7.40|
EPOCH[336/1000] loss0.014-|Sample:7.23|
EPOCH[337/1000] loss0.014-|Sample:7.26|
EPOCH[338/1000] loss0.014-|Sample:7.48|
EPOCH[339/1000] loss0.013-|Sample:7.19|
EPOCH[340/1000] loss0.014-|Sample:7.20|
[TEST]
{'precision': array([0.01431571]), 'recall': array([0.0299383]), 'ndcg': array([0.02430936])}
EPOCH[341/1000] loss0.014-|Sample:7.19|
EPOCH[342/1000] loss0.014-|Sample:7.34|
EPOCH[343/1000] loss0.014-|Sample:7.33|
EPOCH[344/1000] loss0.014-|Sample:7.50|
EPOCH[345/1000] loss0.013-|Sample:7.37|
EPOCH[346/1000] loss0.013-|Sample:7.25|
EPOCH[347/1000] loss0.013-|Sample:7.30|
EPOCH[348/1000] loss0.014-|Sample:7.78|
EPOCH[349/1000] loss0.014-|Sample:7.31|
EPOCH[350/1000] loss0.013-|Sample:7.23|
[TEST]
{'precision': array([0.01439624]), 'recall': array([0.03017243]), 'ndcg': array([0.02430398])}
EPOCH[351/1000] loss0.013-|Sample:7.28|
EPOCH[352/1000] loss0.013-|Sample:7.22|
EPOCH[353/1000] loss0.013-|Sample:7.33|
EPOCH[354/1000] loss0.013-|Sample:7.23|
EPOCH[355/1000] loss0.013-|Sample:7.36|
EPOCH[356/1000] loss0.013-|Sample:7.23|
EPOCH[357/1000] loss0.013-|Sample:7.20|
EPOCH[358/1000] loss0.013-|Sample:7.17|
EPOCH[359/1000] loss0.013-|Sample:7.36|
EPOCH[360/1000] loss0.013-|Sample:7.22|
[TEST]
{'precision': array([0.0148178]), 'recall': array([0.03108078]), 'ndcg': array([0.0252378])}
EPOCH[361/1000] loss0.013-|Sample:7.30|
EPOCH[362/1000] loss0.013-|Sample:7.19|
EPOCH[363/1000] loss0.013-|Sample:7.42|
EPOCH[364/1000] loss0.013-|Sample:7.15|
EPOCH[365/1000] loss0.013-|Sample:7.42|
EPOCH[366/1000] loss0.013-|Sample:7.14|
EPOCH[367/1000] loss0.013-|Sample:7.33|
EPOCH[368/1000] loss0.013-|Sample:7.20|
EPOCH[369/1000] loss0.013-|Sample:8.09|
EPOCH[370/1000] loss0.013-|Sample:7.23|
[TEST]
{'precision': array([0.01496305]), 'recall': array([0.03143102]), 'ndcg': array([0.02555602])}
EPOCH[371/1000] loss0.013-|Sample:7.22|
EPOCH[372/1000] loss0.013-|Sample:7.42|
EPOCH[373/1000] loss0.013-|Sample:7.20|
EPOCH[374/1000] loss0.013-|Sample:7.83|
EPOCH[375/1000] loss0.013-|Sample:7.19|
EPOCH[376/1000] loss0.013-|Sample:7.23|
EPOCH[377/1000] loss0.013-|Sample:7.19|
EPOCH[378/1000] loss0.013-|Sample:7.64|
EPOCH[379/1000] loss0.013-|Sample:7.22|
EPOCH[380/1000] loss0.013-|Sample:7.19|
[TEST]
{'precision': array([0.01510357]), 'recall': array([0.03183233]), 'ndcg': array([0.02591834])}
EPOCH[381/1000] loss0.013-|Sample:7.36|
EPOCH[382/1000] loss0.013-|Sample:7.44|
EPOCH[383/1000] loss0.012-|Sample:7.78|
EPOCH[384/1000] loss0.013-|Sample:7.23|
EPOCH[385/1000] loss0.013-|Sample:7.22|
EPOCH[386/1000] loss0.012-|Sample:7.65|
EPOCH[387/1000] loss0.013-|Sample:7.36|
EPOCH[388/1000] loss0.012-|Sample:7.65|
EPOCH[389/1000] loss0.012-|Sample:7.34|
EPOCH[390/1000] loss0.013-|Sample:7.26|
[TEST]
{'precision': array([0.01527725]), 'recall': array([0.03235111]), 'ndcg': array([0.02624294])}
EPOCH[391/1000] loss0.013-|Sample:7.44|
EPOCH[392/1000] loss0.012-|Sample:7.19|
EPOCH[393/1000] loss0.012-|Sample:7.31|
EPOCH[394/1000] loss0.012-|Sample:7.59|
EPOCH[395/1000] loss0.012-|Sample:7.67|
EPOCH[396/1000] loss0.012-|Sample:7.19|
EPOCH[397/1000] loss0.012-|Sample:7.39|
EPOCH[398/1000] loss0.012-|Sample:7.53|
EPOCH[399/1000] loss0.012-|Sample:8.15|
EPOCH[400/1000] loss0.012-|Sample:7.11|
[TEST]
{'precision': array([0.01529778]), 'recall': array([0.03231707]), 'ndcg': array([0.0264858])}
EPOCH[401/1000] loss0.012-|Sample:7.34|
EPOCH[402/1000] loss0.012-|Sample:7.22|
EPOCH[403/1000] loss0.012-|Sample:7.20|
EPOCH[404/1000] loss0.012-|Sample:7.48|
EPOCH[405/1000] loss0.012-|Sample:7.26|
EPOCH[406/1000] loss0.012-|Sample:7.50|
EPOCH[407/1000] loss0.012-|Sample:7.20|
EPOCH[408/1000] loss0.012-|Sample:7.87|
EPOCH[409/1000] loss0.012-|Sample:7.26|
EPOCH[410/1000] loss0.012-|Sample:7.25|
[TEST]
{'precision': array([0.01538146]), 'recall': array([0.03266964]), 'ndcg': array([0.02661312])}
EPOCH[411/1000] loss0.012-|Sample:7.22|
EPOCH[412/1000] loss0.012-|Sample:7.20|
EPOCH[413/1000] loss0.012-|Sample:7.20|
EPOCH[414/1000] loss0.012-|Sample:7.17|
EPOCH[415/1000] loss0.012-|Sample:7.25|
EPOCH[416/1000] loss0.012-|Sample:7.17|
EPOCH[417/1000] loss0.012-|Sample:7.25|
EPOCH[418/1000] loss0.012-|Sample:7.14|
EPOCH[419/1000] loss0.012-|Sample:7.26|
EPOCH[420/1000] loss0.012-|Sample:7.33|
[TEST]
{'precision': array([0.01555513]), 'recall': array([0.03309656]), 'ndcg': array([0.0268115])}
EPOCH[421/1000] loss0.012-|Sample:7.28|
EPOCH[422/1000] loss0.012-|Sample:7.44|
EPOCH[423/1000] loss0.012-|Sample:7.28|
EPOCH[424/1000] loss0.012-|Sample:7.23|
EPOCH[425/1000] loss0.012-|Sample:7.37|
EPOCH[426/1000] loss0.012-|Sample:7.25|
EPOCH[427/1000] loss0.012-|Sample:7.19|
EPOCH[428/1000] loss0.012-|Sample:7.48|
EPOCH[429/1000] loss0.012-|Sample:7.28|
EPOCH[430/1000] loss0.012-|Sample:8.15|
[TEST]
{'precision': array([0.01576039]), 'recall': array([0.03357719]), 'ndcg': array([0.02742796])}
EPOCH[431/1000] loss0.012-|Sample:7.61|
EPOCH[432/1000] loss0.012-|Sample:7.58|
EPOCH[433/1000] loss0.012-|Sample:7.55|
EPOCH[434/1000] loss0.012-|Sample:7.20|
EPOCH[435/1000] loss0.012-|Sample:7.34|
EPOCH[436/1000] loss0.012-|Sample:7.50|
EPOCH[437/1000] loss0.012-|Sample:7.36|
EPOCH[438/1000] loss0.012-|Sample:7.14|
EPOCH[439/1000] loss0.012-|Sample:7.33|
EPOCH[440/1000] loss0.012-|Sample:7.84|
[TEST]
{'precision': array([0.01580776]), 'recall': array([0.03385983]), 'ndcg': array([0.0274795])}
EPOCH[441/1000] loss0.012-|Sample:7.69|
EPOCH[442/1000] loss0.012-|Sample:7.22|
EPOCH[443/1000] loss0.012-|Sample:7.39|
EPOCH[444/1000] loss0.011-|Sample:7.22|
EPOCH[445/1000] loss0.011-|Sample:7.37|
EPOCH[446/1000] loss0.012-|Sample:7.59|
EPOCH[447/1000] loss0.011-|Sample:7.20|
EPOCH[448/1000] loss0.012-|Sample:7.20|
EPOCH[449/1000] loss0.012-|Sample:7.12|
EPOCH[450/1000] loss0.012-|Sample:7.30|
[TEST]
{'precision': array([0.01583933]), 'recall': array([0.03384325]), 'ndcg': array([0.02759282])}
EPOCH[451/1000] loss0.011-|Sample:7.23|
EPOCH[452/1000] loss0.011-|Sample:7.19|
EPOCH[453/1000] loss0.011-|Sample:7.34|
EPOCH[454/1000] loss0.011-|Sample:7.15|
EPOCH[455/1000] loss0.011-|Sample:7.48|
EPOCH[456/1000] loss0.011-|Sample:7.65|
EPOCH[457/1000] loss0.011-|Sample:7.72|
EPOCH[458/1000] loss0.011-|Sample:7.31|
EPOCH[459/1000] loss0.011-|Sample:7.28|
EPOCH[460/1000] loss0.011-|Sample:8.47|
[TEST]
{'precision': array([0.01611879]), 'recall': array([0.0345755]), 'ndcg': array([0.02801496])}
EPOCH[461/1000] loss0.011-|Sample:7.39|
EPOCH[462/1000] loss0.011-|Sample:7.48|
EPOCH[463/1000] loss0.011-|Sample:7.23|
EPOCH[464/1000] loss0.011-|Sample:7.22|
EPOCH[465/1000] loss0.011-|Sample:7.55|
EPOCH[466/1000] loss0.011-|Sample:7.17|
EPOCH[467/1000] loss0.011-|Sample:7.25|
EPOCH[468/1000] loss0.011-|Sample:7.90|
EPOCH[469/1000] loss0.011-|Sample:7.30|
EPOCH[470/1000] loss0.011-|Sample:7.94|
[TEST]
{'precision': array([0.01636352]), 'recall': array([0.03504406]), 'ndcg': array([0.02852259])}
EPOCH[471/1000] loss0.011-|Sample:7.76|
EPOCH[472/1000] loss0.011-|Sample:7.28|
EPOCH[473/1000] loss0.011-|Sample:7.55|
EPOCH[474/1000] loss0.011-|Sample:7.06|
EPOCH[475/1000] loss0.011-|Sample:7.34|
EPOCH[476/1000] loss0.011-|Sample:7.67|
EPOCH[477/1000] loss0.011-|Sample:7.40|
EPOCH[478/1000] loss0.011-|Sample:7.20|
EPOCH[479/1000] loss0.011-|Sample:7.23|
EPOCH[480/1000] loss0.011-|Sample:7.28|
[TEST]
{'precision': array([0.01633194]), 'recall': array([0.03517884]), 'ndcg': array([0.02842596])}
EPOCH[481/1000] loss0.011-|Sample:7.22|
EPOCH[482/1000] loss0.011-|Sample:7.17|
EPOCH[483/1000] loss0.011-|Sample:7.50|
EPOCH[484/1000] loss0.011-|Sample:7.97|
EPOCH[485/1000] loss0.011-|Sample:7.25|
EPOCH[486/1000] loss0.011-|Sample:7.31|
EPOCH[487/1000] loss0.011-|Sample:7.22|
EPOCH[488/1000] loss0.011-|Sample:7.22|
EPOCH[489/1000] loss0.011-|Sample:7.37|
EPOCH[490/1000] loss0.011-|Sample:7.22|
[TEST]
{'precision': array([0.01654194]), 'recall': array([0.03562376]), 'ndcg': array([0.028836])}
EPOCH[491/1000] loss0.011-|Sample:7.39|
EPOCH[492/1000] loss0.011-|Sample:7.69|
EPOCH[493/1000] loss0.011-|Sample:7.30|
EPOCH[494/1000] loss0.011-|Sample:7.15|
EPOCH[495/1000] loss0.011-|Sample:7.26|
EPOCH[496/1000] loss0.011-|Sample:7.17|
EPOCH[497/1000] loss0.011-|Sample:7.17|
EPOCH[498/1000] loss0.011-|Sample:7.22|
EPOCH[499/1000] loss0.011-|Sample:7.22|
EPOCH[500/1000] loss0.011-|Sample:7.37|
[TEST]
{'precision': array([0.01674403]), 'recall': array([0.03625215]), 'ndcg': array([0.02926935])}
EPOCH[501/1000] loss0.011-|Sample:7.14|
EPOCH[502/1000] loss0.011-|Sample:7.28|
EPOCH[503/1000] loss0.011-|Sample:7.20|
EPOCH[504/1000] loss0.011-|Sample:7.53|
EPOCH[505/1000] loss0.011-|Sample:7.34|
EPOCH[506/1000] loss0.011-|Sample:7.22|
EPOCH[507/1000] loss0.011-|Sample:7.64|
EPOCH[508/1000] loss0.011-|Sample:7.15|
EPOCH[509/1000] loss0.011-|Sample:8.15|
EPOCH[510/1000] loss0.011-|Sample:7.20|
[TEST]
{'precision': array([0.01669824]), 'recall': array([0.03628264]), 'ndcg': array([0.0294196])}
EPOCH[511/1000] loss0.011-|Sample:7.30|
EPOCH[512/1000] loss0.011-|Sample:7.47|
EPOCH[513/1000] loss0.011-|Sample:7.30|
EPOCH[514/1000] loss0.011-|Sample:7.37|
EPOCH[515/1000] loss0.011-|Sample:7.36|
EPOCH[516/1000] loss0.011-|Sample:7.31|
EPOCH[517/1000] loss0.011-|Sample:7.22|
EPOCH[518/1000] loss0.011-|Sample:7.34|
EPOCH[519/1000] loss0.011-|Sample:7.45|
EPOCH[520/1000] loss0.011-|Sample:7.47|
[TEST]
{'precision': array([0.01680403]), 'recall': array([0.03643046]), 'ndcg': array([0.02947386])}
EPOCH[521/1000] loss0.011-|Sample:7.12|
EPOCH[522/1000] loss0.011-|Sample:8.34|
EPOCH[523/1000] loss0.011-|Sample:7.20|
EPOCH[524/1000] loss0.011-|Sample:7.28|
EPOCH[525/1000] loss0.011-|Sample:7.30|
EPOCH[526/1000] loss0.011-|Sample:7.26|
EPOCH[527/1000] loss0.011-|Sample:7.17|
EPOCH[528/1000] loss0.011-|Sample:7.17|
EPOCH[529/1000] loss0.011-|Sample:7.15|
EPOCH[530/1000] loss0.011-|Sample:7.48|
[TEST]
{'precision': array([0.0169556]), 'recall': array([0.03666686]), 'ndcg': array([0.02966809])}
EPOCH[531/1000] loss0.010-|Sample:7.20|
EPOCH[532/1000] loss0.011-|Sample:7.86|
EPOCH[533/1000] loss0.011-|Sample:7.31|
EPOCH[534/1000] loss0.010-|Sample:7.36|
EPOCH[535/1000] loss0.011-|Sample:7.14|
EPOCH[536/1000] loss0.011-|Sample:7.22|
EPOCH[537/1000] loss0.011-|Sample:7.15|
EPOCH[538/1000] loss0.011-|Sample:7.20|
EPOCH[539/1000] loss0.010-|Sample:7.20|
EPOCH[540/1000] loss0.011-|Sample:7.65|
[TEST]
{'precision': array([0.01710402]), 'recall': array([0.03697541]), 'ndcg': array([0.02998145])}
EPOCH[541/1000] loss0.011-|Sample:7.26|
EPOCH[542/1000] loss0.010-|Sample:7.64|
EPOCH[543/1000] loss0.011-|Sample:7.70|
EPOCH[544/1000] loss0.011-|Sample:7.34|
EPOCH[545/1000] loss0.010-|Sample:7.51|
EPOCH[546/1000] loss0.011-|Sample:7.23|
EPOCH[547/1000] loss0.010-|Sample:7.89|
EPOCH[548/1000] loss0.010-|Sample:7.22|
EPOCH[549/1000] loss0.010-|Sample:7.39|
EPOCH[550/1000] loss0.010-|Sample:7.31|
[TEST]
{'precision': array([0.01730296]), 'recall': array([0.0375769]), 'ndcg': array([0.03056626])}
EPOCH[551/1000] loss0.010-|Sample:7.62|
EPOCH[552/1000] loss0.010-|Sample:7.20|
EPOCH[553/1000] loss0.010-|Sample:7.47|
EPOCH[554/1000] loss0.010-|Sample:7.17|
EPOCH[555/1000] loss0.010-|Sample:7.26|
EPOCH[556/1000] loss0.010-|Sample:7.20|
EPOCH[557/1000] loss0.010-|Sample:7.23|
EPOCH[558/1000] loss0.010-|Sample:7.11|
EPOCH[559/1000] loss0.010-|Sample:7.40|
EPOCH[560/1000] loss0.010-|Sample:7.44|
[TEST]
{'precision': array([0.01734243]), 'recall': array([0.0375244]), 'ndcg': array([0.0304036])}
EPOCH[561/1000] loss0.010-|Sample:7.83|
EPOCH[562/1000] loss0.010-|Sample:7.20|
EPOCH[563/1000] loss0.010-|Sample:7.55|
EPOCH[564/1000] loss0.010-|Sample:7.61|
EPOCH[565/1000] loss0.010-|Sample:7.26|
EPOCH[566/1000] loss0.010-|Sample:7.47|
EPOCH[567/1000] loss0.010-|Sample:7.23|
EPOCH[568/1000] loss0.010-|Sample:7.31|
EPOCH[569/1000] loss0.010-|Sample:7.14|
EPOCH[570/1000] loss0.010-|Sample:7.31|
[TEST]
{'precision': array([0.01746874]), 'recall': array([0.0378436]), 'ndcg': array([0.03067722])}
EPOCH[571/1000] loss0.010-|Sample:7.17|
EPOCH[572/1000] loss0.010-|Sample:7.86|
EPOCH[573/1000] loss0.010-|Sample:7.26|
EPOCH[574/1000] loss0.010-|Sample:7.28|
EPOCH[575/1000] loss0.010-|Sample:8.08|
EPOCH[576/1000] loss0.010-|Sample:7.17|
EPOCH[577/1000] loss0.010-|Sample:7.36|
EPOCH[578/1000] loss0.010-|Sample:7.19|
EPOCH[579/1000] loss0.010-|Sample:7.28|
EPOCH[580/1000] loss0.010-|Sample:7.22|
[TEST]
{'precision': array([0.01750347]), 'recall': array([0.03804377]), 'ndcg': array([0.03073318])}
EPOCH[581/1000] loss0.010-|Sample:7.14|
EPOCH[582/1000] loss0.010-|Sample:7.08|
EPOCH[583/1000] loss0.010-|Sample:7.80|
EPOCH[584/1000] loss0.010-|Sample:7.33|
EPOCH[585/1000] loss0.010-|Sample:7.34|
EPOCH[586/1000] loss0.010-|Sample:7.22|
EPOCH[587/1000] loss0.010-|Sample:7.61|
EPOCH[588/1000] loss0.010-|Sample:7.40|
EPOCH[589/1000] loss0.010-|Sample:7.37|
EPOCH[590/1000] loss0.010-|Sample:7.19|
[TEST]
{'precision': array([0.01773557]), 'recall': array([0.0385135]), 'ndcg': array([0.031256])}
EPOCH[591/1000] loss0.010-|Sample:7.90|
EPOCH[592/1000] loss0.010-|Sample:7.61|
EPOCH[593/1000] loss0.010-|Sample:7.28|
EPOCH[594/1000] loss0.010-|Sample:7.25|
EPOCH[595/1000] loss0.010-|Sample:7.56|
EPOCH[596/1000] loss0.010-|Sample:7.11|
EPOCH[597/1000] loss0.010-|Sample:7.47|
EPOCH[598/1000] loss0.010-|Sample:8.09|
EPOCH[599/1000] loss0.010-|Sample:7.22|
EPOCH[600/1000] loss0.010-|Sample:7.97|
[TEST]
{'precision': array([0.01778294]), 'recall': array([0.03861614]), 'ndcg': array([0.03130637])}
EPOCH[601/1000] loss0.010-|Sample:7.23|
EPOCH[602/1000] loss0.010-|Sample:7.30|
EPOCH[603/1000] loss0.010-|Sample:7.23|
EPOCH[604/1000] loss0.010-|Sample:7.61|
EPOCH[605/1000] loss0.010-|Sample:7.25|
EPOCH[606/1000] loss0.010-|Sample:7.40|
EPOCH[607/1000] loss0.010-|Sample:7.20|
EPOCH[608/1000] loss0.010-|Sample:7.33|
EPOCH[609/1000] loss0.010-|Sample:7.25|
EPOCH[610/1000] loss0.010-|Sample:7.19|
[TEST]
{'precision': array([0.01779872]), 'recall': array([0.03859347]), 'ndcg': array([0.03127801])}
EPOCH[611/1000] loss0.010-|Sample:7.20|
EPOCH[612/1000] loss0.010-|Sample:7.28|
EPOCH[613/1000] loss0.010-|Sample:7.72|
EPOCH[614/1000] loss0.010-|Sample:7.20|
EPOCH[615/1000] loss0.010-|Sample:7.72|
EPOCH[616/1000] loss0.010-|Sample:7.33|
EPOCH[617/1000] loss0.010-|Sample:7.20|
EPOCH[618/1000] loss0.010-|Sample:7.23|
EPOCH[619/1000] loss0.010-|Sample:7.90|
EPOCH[620/1000] loss0.010-|Sample:7.84|
[TEST]
{'precision': array([0.01793135]), 'recall': array([0.03895293]), 'ndcg': array([0.03149683])}
EPOCH[621/1000] loss0.010-|Sample:7.33|
EPOCH[622/1000] loss0.010-|Sample:7.23|
EPOCH[623/1000] loss0.010-|Sample:7.58|
EPOCH[624/1000] loss0.010-|Sample:7.39|
EPOCH[625/1000] loss0.010-|Sample:7.23|
EPOCH[626/1000] loss0.010-|Sample:7.23|
EPOCH[627/1000] loss0.010-|Sample:7.39|
EPOCH[628/1000] loss0.010-|Sample:7.22|
EPOCH[629/1000] loss0.010-|Sample:7.28|
EPOCH[630/1000] loss0.010-|Sample:7.17|
[TEST]
{'precision': array([0.01800556]), 'recall': array([0.03925114]), 'ndcg': array([0.03161977])}
EPOCH[631/1000] loss0.010-|Sample:7.26|
EPOCH[632/1000] loss0.010-|Sample:7.42|
EPOCH[633/1000] loss0.010-|Sample:7.31|
EPOCH[634/1000] loss0.010-|Sample:7.22|
EPOCH[635/1000] loss0.010-|Sample:7.58|
EPOCH[636/1000] loss0.010-|Sample:7.31|
EPOCH[637/1000] loss0.010-|Sample:7.20|
EPOCH[638/1000] loss0.010-|Sample:7.26|
EPOCH[639/1000] loss0.010-|Sample:7.26|
EPOCH[640/1000] loss0.010-|Sample:7.97|
[TEST]
{'precision': array([0.01816976]), 'recall': array([0.03963993]), 'ndcg': array([0.03195034])}
EPOCH[641/1000] loss0.010-|Sample:7.56|
EPOCH[642/1000] loss0.010-|Sample:7.25|
EPOCH[643/1000] loss0.010-|Sample:7.09|
EPOCH[644/1000] loss0.010-|Sample:7.30|
EPOCH[645/1000] loss0.010-|Sample:7.40|
EPOCH[646/1000] loss0.010-|Sample:7.40|
EPOCH[647/1000] loss0.010-|Sample:7.72|
EPOCH[648/1000] loss0.010-|Sample:7.30|
EPOCH[649/1000] loss0.010-|Sample:7.26|
EPOCH[650/1000] loss0.010-|Sample:7.25|
[TEST]
{'precision': array([0.01831028]), 'recall': array([0.04004496]), 'ndcg': array([0.03225638])}
EPOCH[651/1000] loss0.010-|Sample:7.97|
EPOCH[652/1000] loss0.010-|Sample:7.53|
EPOCH[653/1000] loss0.010-|Sample:7.25|
EPOCH[654/1000] loss0.010-|Sample:7.15|
EPOCH[655/1000] loss0.010-|Sample:7.20|
EPOCH[656/1000] loss0.010-|Sample:7.23|
EPOCH[657/1000] loss0.010-|Sample:7.26|
EPOCH[658/1000] loss0.010-|Sample:7.26|
EPOCH[659/1000] loss0.010-|Sample:7.39|
EPOCH[660/1000] loss0.010-|Sample:7.37|
[TEST]
{'precision': array([0.01838133]), 'recall': array([0.04024812]), 'ndcg': array([0.03243543])}
EPOCH[661/1000] loss0.010-|Sample:7.70|
EPOCH[662/1000] loss0.010-|Sample:7.22|
EPOCH[663/1000] loss0.010-|Sample:7.84|
EPOCH[664/1000] loss0.010-|Sample:7.62|
EPOCH[665/1000] loss0.010-|Sample:7.31|
EPOCH[666/1000] loss0.010-|Sample:7.23|
EPOCH[667/1000] loss0.009-|Sample:7.30|
EPOCH[668/1000] loss0.010-|Sample:7.23|
EPOCH[669/1000] loss0.009-|Sample:7.23|
EPOCH[670/1000] loss0.010-|Sample:7.22|
[TEST]
{'precision': array([0.01850922]), 'recall': array([0.04041535]), 'ndcg': array([0.0326611])}
EPOCH[671/1000] loss0.010-|Sample:6.87|
EPOCH[672/1000] loss0.009-|Sample:6.83|
EPOCH[673/1000] loss0.010-|Sample:6.87|
EPOCH[674/1000] loss0.010-|Sample:6.81|
EPOCH[675/1000] loss0.010-|Sample:6.87|
EPOCH[676/1000] loss0.010-|Sample:6.76|
EPOCH[677/1000] loss0.010-|Sample:6.86|
EPOCH[678/1000] loss0.010-|Sample:6.83|
EPOCH[679/1000] loss0.010-|Sample:6.84|
EPOCH[680/1000] loss0.010-|Sample:6.84|
[TEST]
{'precision': array([0.0186008]), 'recall': array([0.04099761]), 'ndcg': array([0.03298524])}
EPOCH[681/1000] loss0.010-|Sample:6.83|
EPOCH[682/1000] loss0.010-|Sample:6.83|
EPOCH[683/1000] loss0.009-|Sample:6.92|
EPOCH[684/1000] loss0.010-|Sample:6.81|
EPOCH[685/1000] loss0.010-|Sample:6.89|
EPOCH[686/1000] loss0.010-|Sample:6.84|
EPOCH[687/1000] loss0.010-|Sample:6.80|
EPOCH[688/1000] loss0.009-|Sample:6.87|
EPOCH[689/1000] loss0.010-|Sample:6.86|
EPOCH[690/1000] loss0.010-|Sample:6.89|
[TEST]
{'precision': array([0.0185629]), 'recall': array([0.04051005]), 'ndcg': array([0.03269871])}
EPOCH[691/1000] loss0.009-|Sample:6.92|
EPOCH[692/1000] loss0.010-|Sample:6.86|
EPOCH[693/1000] loss0.010-|Sample:6.90|
EPOCH[694/1000] loss0.009-|Sample:6.83|
EPOCH[695/1000] loss0.009-|Sample:6.90|
EPOCH[696/1000] loss0.009-|Sample:6.83|
EPOCH[697/1000] loss0.010-|Sample:6.86|
EPOCH[698/1000] loss0.010-|Sample:6.83|
EPOCH[699/1000] loss0.010-|Sample:6.86|
EPOCH[700/1000] loss0.009-|Sample:6.84|
[TEST]
{'precision': array([0.01881237]), 'recall': array([0.04119798]), 'ndcg': array([0.03333288])}
EPOCH[701/1000] loss0.009-|Sample:6.89|
EPOCH[702/1000] loss0.010-|Sample:6.81|
EPOCH[703/1000] loss0.009-|Sample:6.86|
EPOCH[704/1000] loss0.009-|Sample:6.80|
EPOCH[705/1000] loss0.009-|Sample:6.92|
EPOCH[706/1000] loss0.009-|Sample:6.80|
EPOCH[707/1000] loss0.009-|Sample:6.86|
EPOCH[708/1000] loss0.010-|Sample:6.81|
EPOCH[709/1000] loss0.009-|Sample:6.83|
EPOCH[710/1000] loss0.009-|Sample:6.84|
[TEST]
{'precision': array([0.0189371]), 'recall': array([0.04163874]), 'ndcg': array([0.03353145])}
EPOCH[711/1000] loss0.009-|Sample:6.90|
EPOCH[712/1000] loss0.009-|Sample:6.81|
EPOCH[713/1000] loss0.009-|Sample:6.86|
EPOCH[714/1000] loss0.009-|Sample:6.81|
EPOCH[715/1000] loss0.009-|Sample:6.90|
EPOCH[716/1000] loss0.009-|Sample:6.84|
EPOCH[717/1000] loss0.009-|Sample:6.87|
EPOCH[718/1000] loss0.009-|Sample:6.81|
EPOCH[719/1000] loss0.009-|Sample:6.86|
EPOCH[720/1000] loss0.009-|Sample:6.84|
[TEST]
{'precision': array([0.01882184]), 'recall': array([0.0414203]), 'ndcg': array([0.03325914])}
EPOCH[721/1000] loss0.009-|Sample:6.84|
EPOCH[722/1000] loss0.009-|Sample:6.86|
EPOCH[723/1000] loss0.009-|Sample:6.81|
EPOCH[724/1000] loss0.009-|Sample:6.86|
EPOCH[725/1000] loss0.009-|Sample:6.90|
EPOCH[726/1000] loss0.009-|Sample:6.87|
EPOCH[727/1000] loss0.009-|Sample:6.89|
EPOCH[728/1000] loss0.009-|Sample:6.86|
EPOCH[729/1000] loss0.009-|Sample:6.90|
EPOCH[730/1000] loss0.009-|Sample:6.86|
[TEST]
{'precision': array([0.01888657]), 'recall': array([0.04132817]), 'ndcg': array([0.03335617])}
EPOCH[731/1000] loss0.009-|Sample:6.90|
EPOCH[732/1000] loss0.009-|Sample:6.81|
EPOCH[733/1000] loss0.009-|Sample:6.86|
EPOCH[734/1000] loss0.009-|Sample:6.81|
EPOCH[735/1000] loss0.009-|Sample:6.90|
EPOCH[736/1000] loss0.009-|Sample:6.81|
EPOCH[737/1000] loss0.009-|Sample:6.86|
EPOCH[738/1000] loss0.009-|Sample:6.84|
EPOCH[739/1000] loss0.009-|Sample:6.83|
EPOCH[740/1000] loss0.009-|Sample:6.86|
[TEST]
{'precision': array([0.01889763]), 'recall': array([0.04132174]), 'ndcg': array([0.03327874])}
EPOCH[741/1000] loss0.009-|Sample:6.81|
EPOCH[742/1000] loss0.009-|Sample:6.87|
EPOCH[743/1000] loss0.009-|Sample:6.86|
EPOCH[744/1000] loss0.009-|Sample:6.81|
EPOCH[745/1000] loss0.009-|Sample:6.89|
EPOCH[746/1000] loss0.009-|Sample:6.87|
EPOCH[747/1000] loss0.009-|Sample:6.87|
EPOCH[748/1000] loss0.009-|Sample:6.89|
EPOCH[749/1000] loss0.009-|Sample:6.84|
EPOCH[750/1000] loss0.009-|Sample:6.89|
[TEST]
{'precision': array([0.01899236]), 'recall': array([0.04163997]), 'ndcg': array([0.03365049])}
EPOCH[751/1000] loss0.009-|Sample:6.89|
EPOCH[752/1000] loss0.009-|Sample:6.84|
EPOCH[753/1000] loss0.009-|Sample:6.86|
EPOCH[754/1000] loss0.009-|Sample:6.83|
EPOCH[755/1000] loss0.009-|Sample:6.92|
EPOCH[756/1000] loss0.009-|Sample:6.84|
EPOCH[757/1000] loss0.009-|Sample:6.86|
EPOCH[758/1000] loss0.009-|Sample:6.84|
EPOCH[759/1000] loss0.009-|Sample:6.86|
EPOCH[760/1000] loss0.009-|Sample:6.86|
[TEST]
{'precision': array([0.01888657]), 'recall': array([0.0417913]), 'ndcg': array([0.03366076])}
EPOCH[761/1000] loss0.009-|Sample:6.81|
EPOCH[762/1000] loss0.009-|Sample:6.81|
EPOCH[763/1000] loss0.009-|Sample:6.86|
EPOCH[764/1000] loss0.009-|Sample:6.89|
EPOCH[765/1000] loss0.009-|Sample:6.89|
EPOCH[766/1000] loss0.009-|Sample:6.84|
EPOCH[767/1000] loss0.009-|Sample:6.89|
EPOCH[768/1000] loss0.009-|Sample:6.81|
EPOCH[769/1000] loss0.009-|Sample:6.84|
EPOCH[770/1000] loss0.009-|Sample:6.84|
[TEST]
{'precision': array([0.01908078]), 'recall': array([0.04171316]), 'ndcg': array([0.03389037])}
EPOCH[771/1000] loss0.009-|Sample:6.84|
EPOCH[772/1000] loss0.009-|Sample:6.84|
EPOCH[773/1000] loss0.009-|Sample:6.87|
EPOCH[774/1000] loss0.009-|Sample:6.83|
EPOCH[775/1000] loss0.009-|Sample:6.87|
EPOCH[776/1000] loss0.009-|Sample:6.84|
EPOCH[777/1000] loss0.009-|Sample:6.87|
EPOCH[778/1000] loss0.009-|Sample:6.84|
EPOCH[779/1000] loss0.009-|Sample:6.86|
EPOCH[780/1000] loss0.009-|Sample:6.87|
[TEST]
{'precision': array([0.01915498]), 'recall': array([0.04231904]), 'ndcg': array([0.0341182])}
EPOCH[781/1000] loss0.009-|Sample:6.92|
EPOCH[782/1000] loss0.009-|Sample:6.84|
EPOCH[783/1000] loss0.009-|Sample:6.87|
EPOCH[784/1000] loss0.009-|Sample:6.83|
EPOCH[785/1000] loss0.009-|Sample:6.87|
EPOCH[786/1000] loss0.009-|Sample:6.81|
EPOCH[787/1000] loss0.009-|Sample:6.90|
EPOCH[788/1000] loss0.009-|Sample:6.83|
EPOCH[789/1000] loss0.009-|Sample:6.83|
EPOCH[790/1000] loss0.009-|Sample:6.89|
[TEST]
{'precision': array([0.01921182]), 'recall': array([0.04239814]), 'ndcg': array([0.03404374])}
EPOCH[791/1000] loss0.009-|Sample:6.81|
EPOCH[792/1000] loss0.009-|Sample:6.81|
EPOCH[793/1000] loss0.009-|Sample:6.86|
EPOCH[794/1000] loss0.009-|Sample:6.80|
EPOCH[795/1000] loss0.009-|Sample:6.87|
EPOCH[796/1000] loss0.009-|Sample:6.80|
EPOCH[797/1000] loss0.009-|Sample:6.86|
EPOCH[798/1000] loss0.009-|Sample:6.80|
EPOCH[799/1000] loss0.009-|Sample:6.83|
EPOCH[800/1000] loss0.009-|Sample:6.84|
[TEST]
{'precision': array([0.01920866]), 'recall': array([0.04229583]), 'ndcg': array([0.03393232])}
EPOCH[801/1000] loss0.009-|Sample:6.97|
EPOCH[802/1000] loss0.009-|Sample:6.83|
EPOCH[803/1000] loss0.009-|Sample:6.87|
EPOCH[804/1000] loss0.009-|Sample:6.86|
EPOCH[805/1000] loss0.009-|Sample:6.86|
EPOCH[806/1000] loss0.009-|Sample:6.83|
EPOCH[807/1000] loss0.009-|Sample:6.86|
EPOCH[808/1000] loss0.009-|Sample:6.81|
EPOCH[809/1000] loss0.009-|Sample:6.89|
EPOCH[810/1000] loss0.009-|Sample:6.87|
[TEST]
{'precision': array([0.01937918]), 'recall': array([0.04278265]), 'ndcg': array([0.0341541])}
EPOCH[811/1000] loss0.009-|Sample:6.81|
EPOCH[812/1000] loss0.009-|Sample:6.84|
EPOCH[813/1000] loss0.009-|Sample:6.86|
EPOCH[814/1000] loss0.009-|Sample:6.83|
EPOCH[815/1000] loss0.009-|Sample:6.87|
EPOCH[816/1000] loss0.009-|Sample:6.84|
EPOCH[817/1000] loss0.009-|Sample:6.84|
EPOCH[818/1000] loss0.009-|Sample:6.83|
EPOCH[819/1000] loss0.009-|Sample:6.83|
EPOCH[820/1000] loss0.009-|Sample:6.89|
[TEST]
{'precision': array([0.01923235]), 'recall': array([0.04224556]), 'ndcg': array([0.03414115])}
EPOCH[821/1000] loss0.009-|Sample:6.87|
EPOCH[822/1000] loss0.009-|Sample:6.83|
EPOCH[823/1000] loss0.009-|Sample:6.84|
EPOCH[824/1000] loss0.009-|Sample:6.78|
EPOCH[825/1000] loss0.009-|Sample:6.92|
EPOCH[826/1000] loss0.009-|Sample:6.83|
EPOCH[827/1000] loss0.009-|Sample:6.84|
EPOCH[828/1000] loss0.009-|Sample:6.84|
EPOCH[829/1000] loss0.009-|Sample:6.83|
EPOCH[830/1000] loss0.009-|Sample:6.83|
[TEST]
{'precision': array([0.01946129]), 'recall': array([0.04288227]), 'ndcg': array([0.03430073])}
EPOCH[831/1000] loss0.009-|Sample:6.90|
EPOCH[832/1000] loss0.009-|Sample:6.83|
EPOCH[833/1000] loss0.009-|Sample:6.87|
EPOCH[834/1000] loss0.009-|Sample:6.78|
EPOCH[835/1000] loss0.009-|Sample:6.92|
EPOCH[836/1000] loss0.009-|Sample:6.87|
EPOCH[837/1000] loss0.009-|Sample:6.80|
EPOCH[838/1000] loss0.009-|Sample:6.86|
EPOCH[839/1000] loss0.009-|Sample:6.86|
EPOCH[840/1000] loss0.009-|Sample:6.89|
[TEST]
{'precision': array([0.01955286]), 'recall': array([0.04303698]), 'ndcg': array([0.03468156])}
EPOCH[841/1000] loss0.009-|Sample:6.92|
EPOCH[842/1000] loss0.009-|Sample:6.84|
EPOCH[843/1000] loss0.009-|Sample:6.89|
EPOCH[844/1000] loss0.009-|Sample:6.83|
EPOCH[845/1000] loss0.009-|Sample:6.92|
EPOCH[846/1000] loss0.009-|Sample:6.86|
EPOCH[847/1000] loss0.009-|Sample:6.89|
EPOCH[848/1000] loss0.009-|Sample:6.84|
EPOCH[849/1000] loss0.009-|Sample:6.87|
EPOCH[850/1000] loss0.009-|Sample:6.86|
[TEST]
{'precision': array([0.01938234]), 'recall': array([0.04257774]), 'ndcg': array([0.03437314])}
EPOCH[851/1000] loss0.009-|Sample:6.86|
EPOCH[852/1000] loss0.009-|Sample:6.81|
EPOCH[853/1000] loss0.009-|Sample:6.86|
EPOCH[854/1000] loss0.009-|Sample:6.83|
EPOCH[855/1000] loss0.009-|Sample:6.89|
EPOCH[856/1000] loss0.009-|Sample:6.83|
EPOCH[857/1000] loss0.009-|Sample:6.87|
EPOCH[858/1000] loss0.009-|Sample:6.83|
EPOCH[859/1000] loss0.009-|Sample:7.00|
EPOCH[860/1000] loss0.009-|Sample:6.84|
[TEST]
{'precision': array([0.01942023]), 'recall': array([0.04253313]), 'ndcg': array([0.03444762])}
EPOCH[861/1000] loss0.009-|Sample:6.89|
EPOCH[862/1000] loss0.009-|Sample:6.83|
EPOCH[863/1000] loss0.009-|Sample:6.86|
EPOCH[864/1000] loss0.009-|Sample:6.84|
EPOCH[865/1000] loss0.009-|Sample:6.89|
EPOCH[866/1000] loss0.009-|Sample:6.86|
EPOCH[867/1000] loss0.009-|Sample:6.84|
EPOCH[868/1000] loss0.009-|Sample:6.87|
EPOCH[869/1000] loss0.009-|Sample:6.84|
EPOCH[870/1000] loss0.009-|Sample:6.86|
[TEST]
{'precision': array([0.01950392]), 'recall': array([0.04289891]), 'ndcg': array([0.03477001])}
EPOCH[871/1000] loss0.009-|Sample:6.87|
EPOCH[872/1000] loss0.009-|Sample:6.84|
EPOCH[873/1000] loss0.009-|Sample:6.84|
EPOCH[874/1000] loss0.009-|Sample:6.86|
EPOCH[875/1000] loss0.009-|Sample:6.89|
EPOCH[876/1000] loss0.009-|Sample:6.84|
EPOCH[877/1000] loss0.009-|Sample:6.87|
EPOCH[878/1000] loss0.009-|Sample:6.84|
EPOCH[879/1000] loss0.009-|Sample:6.86|
EPOCH[880/1000] loss0.009-|Sample:6.89|
[TEST]
{'precision': array([0.01962075]), 'recall': array([0.04338299]), 'ndcg': array([0.03499639])}
EPOCH[881/1000] loss0.009-|Sample:6.90|
EPOCH[882/1000] loss0.009-|Sample:6.83|
EPOCH[883/1000] loss0.009-|Sample:6.84|
EPOCH[884/1000] loss0.009-|Sample:6.81|
EPOCH[885/1000] loss0.009-|Sample:6.90|
EPOCH[886/1000] loss0.009-|Sample:6.81|
EPOCH[887/1000] loss0.009-|Sample:6.84|
EPOCH[888/1000] loss0.009-|Sample:6.81|
EPOCH[889/1000] loss0.009-|Sample:6.81|
EPOCH[890/1000] loss0.009-|Sample:6.84|
[TEST]
{'precision': array([0.0196097]), 'recall': array([0.04334324]), 'ndcg': array([0.03485057])}
EPOCH[891/1000] loss0.009-|Sample:6.86|
EPOCH[892/1000] loss0.009-|Sample:6.81|
EPOCH[893/1000] loss0.009-|Sample:6.86|
EPOCH[894/1000] loss0.009-|Sample:6.80|
EPOCH[895/1000] loss0.009-|Sample:6.92|
EPOCH[896/1000] loss0.009-|Sample:6.86|
EPOCH[897/1000] loss0.009-|Sample:6.90|
EPOCH[898/1000] loss0.009-|Sample:6.83|
EPOCH[899/1000] loss0.009-|Sample:6.89|
EPOCH[900/1000] loss0.009-|Sample:6.86|
[TEST]
{'precision': array([0.01972812]), 'recall': array([0.04331453]), 'ndcg': array([0.03479704])}
EPOCH[901/1000] loss0.009-|Sample:6.84|
EPOCH[902/1000] loss0.009-|Sample:6.83|
EPOCH[903/1000] loss0.009-|Sample:6.86|
EPOCH[904/1000] loss0.009-|Sample:6.84|
EPOCH[905/1000] loss0.009-|Sample:6.89|
EPOCH[906/1000] loss0.009-|Sample:6.84|
EPOCH[907/1000] loss0.009-|Sample:6.84|
EPOCH[908/1000] loss0.009-|Sample:6.84|
EPOCH[909/1000] loss0.009-|Sample:6.84|
EPOCH[910/1000] loss0.009-|Sample:6.89|
[TEST]
{'precision': array([0.01954812]), 'recall': array([0.04331583]), 'ndcg': array([0.03477485])}
EPOCH[911/1000] loss0.009-|Sample:6.90|
EPOCH[912/1000] loss0.009-|Sample:6.81|
EPOCH[913/1000] loss0.009-|Sample:6.86|
EPOCH[914/1000] loss0.009-|Sample:6.80|
EPOCH[915/1000] loss0.009-|Sample:6.86|
EPOCH[916/1000] loss0.009-|Sample:6.81|
EPOCH[917/1000] loss0.009-|Sample:6.86|
EPOCH[918/1000] loss0.009-|Sample:6.83|
EPOCH[919/1000] loss0.009-|Sample:6.84|
EPOCH[920/1000] loss0.009-|Sample:6.84|
[TEST]
{'precision': array([0.01968233]), 'recall': array([0.04350966]), 'ndcg': array([0.03517236])}
EPOCH[921/1000] loss0.009-|Sample:6.87|
EPOCH[922/1000] loss0.009-|Sample:6.83|
EPOCH[923/1000] loss0.009-|Sample:6.86|
EPOCH[924/1000] loss0.009-|Sample:6.78|
EPOCH[925/1000] loss0.009-|Sample:6.90|
EPOCH[926/1000] loss0.009-|Sample:6.83|
EPOCH[927/1000] loss0.009-|Sample:6.89|
EPOCH[928/1000] loss0.009-|Sample:6.83|
EPOCH[929/1000] loss0.009-|Sample:6.90|
EPOCH[930/1000] loss0.009-|Sample:6.87|
[TEST]
{'precision': array([0.0196397]), 'recall': array([0.04333385]), 'ndcg': array([0.03512751])}
EPOCH[931/1000] loss0.009-|Sample:6.86|
EPOCH[932/1000] loss0.009-|Sample:6.84|
EPOCH[933/1000] loss0.009-|Sample:6.86|
EPOCH[934/1000] loss0.009-|Sample:6.86|
EPOCH[935/1000] loss0.009-|Sample:6.89|
EPOCH[936/1000] loss0.009-|Sample:6.84|
EPOCH[937/1000] loss0.009-|Sample:6.87|
EPOCH[938/1000] loss0.009-|Sample:6.83|
EPOCH[939/1000] loss0.009-|Sample:6.84|
EPOCH[940/1000] loss0.009-|Sample:6.83|
[TEST]
{'precision': array([0.01985285]), 'recall': array([0.04391694]), 'ndcg': array([0.03566115])}
EPOCH[941/1000] loss0.009-|Sample:6.94|
EPOCH[942/1000] loss0.009-|Sample:6.83|
EPOCH[943/1000] loss0.009-|Sample:6.83|
EPOCH[944/1000] loss0.009-|Sample:6.81|
EPOCH[945/1000] loss0.009-|Sample:6.87|
EPOCH[946/1000] loss0.009-|Sample:6.78|
EPOCH[947/1000] loss0.009-|Sample:6.84|
EPOCH[948/1000] loss0.009-|Sample:6.81|
EPOCH[949/1000] loss0.009-|Sample:6.84|
EPOCH[950/1000] loss0.009-|Sample:6.86|
[TEST]
{'precision': array([0.01990811]), 'recall': array([0.04401911]), 'ndcg': array([0.03545764])}
EPOCH[951/1000] loss0.009-|Sample:6.84|
EPOCH[952/1000] loss0.009-|Sample:6.86|
EPOCH[953/1000] loss0.009-|Sample:6.89|
EPOCH[954/1000] loss0.009-|Sample:6.78|
EPOCH[955/1000] loss0.009-|Sample:6.87|
EPOCH[956/1000] loss0.009-|Sample:6.84|
EPOCH[957/1000] loss0.009-|Sample:6.89|
EPOCH[958/1000] loss0.009-|Sample:6.84|
EPOCH[959/1000] loss0.009-|Sample:6.84|
EPOCH[960/1000] loss0.009-|Sample:6.87|
[TEST]
{'precision': array([0.02008968]), 'recall': array([0.0444919]), 'ndcg': array([0.03587676])}
EPOCH[961/1000] loss0.009-|Sample:6.89|
EPOCH[962/1000] loss0.009-|Sample:6.83|
EPOCH[963/1000] loss0.009-|Sample:6.84|
EPOCH[964/1000] loss0.009-|Sample:6.83|
EPOCH[965/1000] loss0.009-|Sample:6.89|
EPOCH[966/1000] loss0.009-|Sample:6.83|
EPOCH[967/1000] loss0.009-|Sample:6.87|
EPOCH[968/1000] loss0.009-|Sample:6.87|
EPOCH[969/1000] loss0.009-|Sample:6.92|
EPOCH[970/1000] loss0.009-|Sample:6.86|
[TEST]
{'precision': array([0.01987811]), 'recall': array([0.0439238]), 'ndcg': array([0.03554292])}
EPOCH[971/1000] loss0.009-|Sample:6.81|
EPOCH[972/1000] loss0.009-|Sample:6.81|
EPOCH[973/1000] loss0.009-|Sample:6.86|
EPOCH[974/1000] loss0.009-|Sample:6.81|
EPOCH[975/1000] loss0.009-|Sample:6.89|
EPOCH[976/1000] loss0.009-|Sample:6.84|
EPOCH[977/1000] loss0.009-|Sample:6.84|
EPOCH[978/1000] loss0.009-|Sample:6.81|
EPOCH[979/1000] loss0.009-|Sample:6.86|
EPOCH[980/1000] loss0.009-|Sample:6.86|
[TEST]
{'precision': array([0.01993179]), 'recall': array([0.04423686]), 'ndcg': array([0.03554548])}
EPOCH[981/1000] loss0.009-|Sample:6.89|
EPOCH[982/1000] loss0.009-|Sample:6.83|
EPOCH[983/1000] loss0.009-|Sample:6.86|
EPOCH[984/1000] loss0.009-|Sample:6.84|
EPOCH[985/1000] loss0.009-|Sample:6.86|
EPOCH[986/1000] loss0.009-|Sample:6.84|
EPOCH[987/1000] loss0.009-|Sample:6.90|
EPOCH[988/1000] loss0.009-|Sample:6.86|
EPOCH[989/1000] loss0.009-|Sample:6.87|
EPOCH[990/1000] loss0.009-|Sample:6.86|
[TEST]
{'precision': array([0.02008336]), 'recall': array([0.04454157]), 'ndcg': array([0.03594012])}
EPOCH[991/1000] loss0.009-|Sample:6.81|
EPOCH[992/1000] loss0.009-|Sample:6.83|
EPOCH[993/1000] loss0.009-|Sample:6.87|
EPOCH[994/1000] loss0.009-|Sample:6.83|
EPOCH[995/1000] loss0.009-|Sample:6.94|
EPOCH[996/1000] loss0.009-|Sample:6.84|
EPOCH[997/1000] loss0.009-|Sample:6.87|
EPOCH[998/1000] loss0.009-|Sample:6.84|
EPOCH[999/1000] loss0.009-|Sample:6.86|
EPOCH[1000/1000] loss0.009-|Sample:6.83|

Process finished with exit code 0

D:\ProgramFiles\Anaconda3\envs\image_caption_python36\python.exe D:/workspace/LightGcn/LightGCN-PyTorch-master/code/main.py
Cpp extension not loaded
>>SEED: 2020
loading [../data/yelp2018]
1237259 interactions for training
324147 interactions for testing
yelp2018 Sparsity : 0.0012958757851778647
yelp2018 is ready to go
===========config================
{'A_n_fold': 100,
 'A_split': False,
 'bigdata': False,
 'bpr_batch_size': 2048,
 'decay': 0.0001,
 'dropout': 0,
 'keep_prob': 0.6,
 'latent_dim_rec': 64,
 'lightGCN_n_layers': 8,
 'lr': 0.001,
 'multicore': 0,
 'pretrain': 0,
 'test_u_batch_size': 100}
cores for test: 6
comment: lgn
tensorboard: 1
LOAD: 0
Weight path: ./checkpoints
Test Topks: [20]
using bpr loss
===========end===================
use NORMAL distribution initilizer
loading adjacency matrix
successfully loaded...
don't split the matrix
lgn is already to go(dropout:0)
load and save to D:\workspace\LightGcn\LightGCN-PyTorch-master\code\checkpoints\lgn-yelp2018-8-64.pth.tar
1625969600.1839094
[TEST]
{'precision': array([0.00040419]), 'recall': array([0.00070388]), 'ndcg': array([0.00062823])}
EPOCH[1/1000] loss0.298-|Sample:7.42|
EPOCH[2/1000] loss0.164-|Sample:7.61|
EPOCH[3/1000] loss0.157-|Sample:7.66|
EPOCH[4/1000] loss0.153-|Sample:7.65|
EPOCH[5/1000] loss0.150-|Sample:7.65|
EPOCH[6/1000] loss0.147-|Sample:7.62|
EPOCH[7/1000] loss0.144-|Sample:7.64|
EPOCH[8/1000] loss0.141-|Sample:7.73|
EPOCH[9/1000] loss0.138-|Sample:7.79|
EPOCH[10/1000] loss0.135-|Sample:8.72|
[TEST]
{'precision': array([0.01602722]), 'recall': array([0.03609618]), 'ndcg': array([0.02847166])}
EPOCH[11/1000] loss0.131-|Sample:8.34|
EPOCH[12/1000] loss0.127-|Sample:7.91|
EPOCH[13/1000] loss0.125-|Sample:7.94|
EPOCH[14/1000] loss0.121-|Sample:7.80|
EPOCH[15/1000] loss0.119-|Sample:7.70|
EPOCH[16/1000] loss0.115-|Sample:8.42|
EPOCH[17/1000] loss0.113-|Sample:9.44|
EPOCH[18/1000] loss0.111-|Sample:9.47|
EPOCH[19/1000] loss0.110-|Sample:9.22|
EPOCH[20/1000] loss0.108-|Sample:9.11|
[TEST]
{'precision': array([0.0180245]), 'recall': array([0.04008426]), 'ndcg': array([0.03176493])}
EPOCH[21/1000] loss0.106-|Sample:9.34|
EPOCH[22/1000] loss0.105-|Sample:9.06|
EPOCH[23/1000] loss0.104-|Sample:9.11|
EPOCH[24/1000] loss0.103-|Sample:9.34|
EPOCH[25/1000] loss0.102-|Sample:8.90|
EPOCH[26/1000] loss0.101-|Sample:9.03|
EPOCH[27/1000] loss0.101-|Sample:9.51|
EPOCH[28/1000] loss0.100-|Sample:8.89|
EPOCH[29/1000] loss0.099-|Sample:9.25|
EPOCH[30/1000] loss0.098-|Sample:9.15|
[TEST]
{'precision': array([0.01855817]), 'recall': array([0.04112229]), 'ndcg': array([0.03272987])}
EPOCH[31/1000] loss0.097-|Sample:8.98|
EPOCH[32/1000] loss0.096-|Sample:9.03|
EPOCH[33/1000] loss0.096-|Sample:8.97|
EPOCH[34/1000] loss0.095-|Sample:9.17|
EPOCH[35/1000] loss0.094-|Sample:9.28|
EPOCH[36/1000] loss0.094-|Sample:8.97|
EPOCH[37/1000] loss0.093-|Sample:9.69|
EPOCH[38/1000] loss0.092-|Sample:9.09|
EPOCH[39/1000] loss0.091-|Sample:8.87|
EPOCH[40/1000] loss0.090-|Sample:9.04|
[TEST]
{'precision': array([0.01900499]), 'recall': array([0.04209361]), 'ndcg': array([0.03352385])}
EPOCH[41/1000] loss0.089-|Sample:9.12|
EPOCH[42/1000] loss0.089-|Sample:9.33|
EPOCH[43/1000] loss0.088-|Sample:9.87|
EPOCH[44/1000] loss0.088-|Sample:9.56|
EPOCH[45/1000] loss0.087-|Sample:9.04|
EPOCH[46/1000] loss0.087-|Sample:10.03|
EPOCH[47/1000] loss0.086-|Sample:9.26|
EPOCH[48/1000] loss0.085-|Sample:8.92|
EPOCH[49/1000] loss0.085-|Sample:9.14|
EPOCH[50/1000] loss0.083-|Sample:8.98|
[TEST]
{'precision': array([0.01961444]), 'recall': array([0.04349997]), 'ndcg': array([0.03480966])}
EPOCH[51/1000] loss0.084-|Sample:9.37|
EPOCH[52/1000] loss0.082-|Sample:8.98|
EPOCH[53/1000] loss0.082-|Sample:9.50|
EPOCH[54/1000] loss0.081-|Sample:9.37|
EPOCH[55/1000] loss0.081-|Sample:9.23|
EPOCH[56/1000] loss0.080-|Sample:8.92|
EPOCH[57/1000] loss0.080-|Sample:9.44|
EPOCH[58/1000] loss0.079-|Sample:9.06|
EPOCH[59/1000] loss0.079-|Sample:10.81|
EPOCH[60/1000] loss0.079-|Sample:8.86|
[TEST]
{'precision': array([0.02025231]), 'recall': array([0.04497425]), 'ndcg': array([0.03603197])}
EPOCH[61/1000] loss0.078-|Sample:9.42|
EPOCH[62/1000] loss0.078-|Sample:9.08|
EPOCH[63/1000] loss0.077-|Sample:9.53|
EPOCH[64/1000] loss0.077-|Sample:9.14|
EPOCH[65/1000] loss0.076-|Sample:9.08|
EPOCH[66/1000] loss0.076-|Sample:9.23|
EPOCH[67/1000] loss0.076-|Sample:9.31|
EPOCH[68/1000] loss0.075-|Sample:8.92|
EPOCH[69/1000] loss0.075-|Sample:9.19|
EPOCH[70/1000] loss0.075-|Sample:8.98|
[TEST]
{'precision': array([0.02060282]), 'recall': array([0.04574813]), 'ndcg': array([0.03672798])}
EPOCH[71/1000] loss0.074-|Sample:8.75|
EPOCH[72/1000] loss0.074-|Sample:9.22|
EPOCH[73/1000] loss0.073-|Sample:9.04|
EPOCH[74/1000] loss0.073-|Sample:8.90|
EPOCH[75/1000] loss0.073-|Sample:8.95|
EPOCH[76/1000] loss0.073-|Sample:9.34|
EPOCH[77/1000] loss0.072-|Sample:9.17|
EPOCH[78/1000] loss0.072-|Sample:8.90|
EPOCH[79/1000] loss0.072-|Sample:9.06|
EPOCH[80/1000] loss0.071-|Sample:9.26|
[TEST]
{'precision': array([0.02103385]), 'recall': array([0.0466628]), 'ndcg': array([0.03753413])}
EPOCH[81/1000] loss0.071-|Sample:9.03|
EPOCH[82/1000] loss0.070-|Sample:9.12|
EPOCH[83/1000] loss0.071-|Sample:9.12|
EPOCH[84/1000] loss0.070-|Sample:9.15|
EPOCH[85/1000] loss0.070-|Sample:9.59|
EPOCH[86/1000] loss0.070-|Sample:9.15|
EPOCH[87/1000] loss0.069-|Sample:9.67|
EPOCH[88/1000] loss0.069-|Sample:9.53|
EPOCH[89/1000] loss0.069-|Sample:9.03|
EPOCH[90/1000] loss0.069-|Sample:9.00|
[TEST]
{'precision': array([0.0212691]), 'recall': array([0.04736744]), 'ndcg': array([0.03809172])}
EPOCH[91/1000] loss0.068-|Sample:8.98|
EPOCH[92/1000] loss0.068-|Sample:9.81|
EPOCH[93/1000] loss0.067-|Sample:9.03|
EPOCH[94/1000] loss0.068-|Sample:9.12|
EPOCH[95/1000] loss0.067-|Sample:9.42|
EPOCH[96/1000] loss0.067-|Sample:8.98|
EPOCH[97/1000] loss0.067-|Sample:9.22|
EPOCH[98/1000] loss0.067-|Sample:9.61|
EPOCH[99/1000] loss0.067-|Sample:9.22|
EPOCH[100/1000] loss0.066-|Sample:9.19|
[TEST]
{'precision': array([0.02160383]), 'recall': array([0.04825013]), 'ndcg': array([0.03864143])}
EPOCH[101/1000] loss0.066-|Sample:9.20|
EPOCH[102/1000] loss0.066-|Sample:7.97|
EPOCH[103/1000] loss0.066-|Sample:8.12|
EPOCH[104/1000] loss0.065-|Sample:9.50|
EPOCH[105/1000] loss0.065-|Sample:9.67|
EPOCH[106/1000] loss0.065-|Sample:9.98|
EPOCH[107/1000] loss0.065-|Sample:8.22|
EPOCH[108/1000] loss0.064-|Sample:8.08|
EPOCH[109/1000] loss0.064-|Sample:9.13|
EPOCH[110/1000] loss0.064-|Sample:8.87|
[TEST]
{'precision': array([0.02183434]), 'recall': array([0.04882769]), 'ndcg': array([0.03916144])}
EPOCH[111/1000] loss0.064-|Sample:9.09|
EPOCH[112/1000] loss0.064-|Sample:9.00|
EPOCH[113/1000] loss0.064-|Sample:8.97|
EPOCH[114/1000] loss0.063-|Sample:9.03|
EPOCH[115/1000] loss0.063-|Sample:9.03|
EPOCH[116/1000] loss0.064-|Sample:9.28|
EPOCH[117/1000] loss0.063-|Sample:9.28|
EPOCH[118/1000] loss0.063-|Sample:9.25|
EPOCH[119/1000] loss0.063-|Sample:9.25|
EPOCH[120/1000] loss0.062-|Sample:9.04|
[TEST]
{'precision': array([0.02220064]), 'recall': array([0.04983773]), 'ndcg': array([0.03971385])}
EPOCH[121/1000] loss0.062-|Sample:9.04|
EPOCH[122/1000] loss0.062-|Sample:9.04|
EPOCH[123/1000] loss0.062-|Sample:9.09|
EPOCH[124/1000] loss0.062-|Sample:9.00|
EPOCH[125/1000] loss0.062-|Sample:9.20|
EPOCH[126/1000] loss0.062-|Sample:8.98|
EPOCH[127/1000] loss0.062-|Sample:9.08|
EPOCH[128/1000] loss0.062-|Sample:9.19|
EPOCH[129/1000] loss0.061-|Sample:9.08|
EPOCH[130/1000] loss0.061-|Sample:9.06|
[TEST]
{'precision': array([0.02247695]), 'recall': array([0.05041498]), 'ndcg': array([0.04021569])}
EPOCH[131/1000] loss0.061-|Sample:9.23|
EPOCH[132/1000] loss0.061-|Sample:9.17|
EPOCH[133/1000] loss0.061-|Sample:8.09|
EPOCH[134/1000] loss0.061-|Sample:9.00|
EPOCH[135/1000] loss0.061-|Sample:9.44|
EPOCH[136/1000] loss0.060-|Sample:8.09|
EPOCH[137/1000] loss0.060-|Sample:8.94|
EPOCH[138/1000] loss0.060-|Sample:9.29|
EPOCH[139/1000] loss0.060-|Sample:8.23|
EPOCH[140/1000] loss0.060-|Sample:8.15|
[TEST]
{'precision': array([0.02277378]), 'recall': array([0.0509626]), 'ndcg': array([0.04079354])}
EPOCH[141/1000] loss0.060-|Sample:8.65|
EPOCH[142/1000] loss0.060-|Sample:8.70|
EPOCH[143/1000] loss0.060-|Sample:9.17|
EPOCH[144/1000] loss0.060-|Sample:9.01|
EPOCH[145/1000] loss0.059-|Sample:8.92|
EPOCH[146/1000] loss0.059-|Sample:9.15|
EPOCH[147/1000] loss0.059-|Sample:9.29|
EPOCH[148/1000] loss0.059-|Sample:9.17|
EPOCH[149/1000] loss0.059-|Sample:9.28|
EPOCH[150/1000] loss0.059-|Sample:9.34|
[TEST]
{'precision': array([0.02293009]), 'recall': array([0.05145702]), 'ndcg': array([0.04111092])}
EPOCH[151/1000] loss0.058-|Sample:8.89|
EPOCH[152/1000] loss0.059-|Sample:9.36|
EPOCH[153/1000] loss0.059-|Sample:9.51|
EPOCH[154/1000] loss0.059-|Sample:9.37|
EPOCH[155/1000] loss0.058-|Sample:9.61|
EPOCH[156/1000] loss0.058-|Sample:9.06|
EPOCH[157/1000] loss0.058-|Sample:9.37|
EPOCH[158/1000] loss0.058-|Sample:8.87|
EPOCH[159/1000] loss0.058-|Sample:9.37|
EPOCH[160/1000] loss0.058-|Sample:9.22|
[TEST]
{'precision': array([0.02311482]), 'recall': array([0.05188015]), 'ndcg': array([0.04155953])}
EPOCH[161/1000] loss0.058-|Sample:9.59|
EPOCH[162/1000] loss0.058-|Sample:9.64|
EPOCH[163/1000] loss0.057-|Sample:9.33|
EPOCH[164/1000] loss0.058-|Sample:9.31|
EPOCH[165/1000] loss0.058-|Sample:9.37|
EPOCH[166/1000] loss0.057-|Sample:9.39|
EPOCH[167/1000] loss0.057-|Sample:9.06|
EPOCH[168/1000] loss0.057-|Sample:9.53|
EPOCH[169/1000] loss0.057-|Sample:9.25|
EPOCH[170/1000] loss0.057-|Sample:9.09|
[TEST]
{'precision': array([0.02346059]), 'recall': array([0.05265592]), 'ndcg': array([0.04214028])}
EPOCH[171/1000] loss0.057-|Sample:9.51|
EPOCH[172/1000] loss0.057-|Sample:9.54|
EPOCH[173/1000] loss0.057-|Sample:9.14|
EPOCH[174/1000] loss0.057-|Sample:8.89|
EPOCH[175/1000] loss0.056-|Sample:8.81|
EPOCH[176/1000] loss0.056-|Sample:8.98|
EPOCH[177/1000] loss0.057-|Sample:9.14|
EPOCH[178/1000] loss0.056-|Sample:10.03|
EPOCH[179/1000] loss0.056-|Sample:9.61|
EPOCH[180/1000] loss0.056-|Sample:9.78|
[TEST]
{'precision': array([0.02353796]), 'recall': array([0.05280307]), 'ndcg': array([0.04233622])}
EPOCH[181/1000] loss0.056-|Sample:10.30|
EPOCH[182/1000] loss0.056-|Sample:9.94|
EPOCH[183/1000] loss0.056-|Sample:10.87|
EPOCH[184/1000] loss0.055-|Sample:10.70|
EPOCH[185/1000] loss0.056-|Sample:11.47|
EPOCH[186/1000] loss0.056-|Sample:10.61|
EPOCH[187/1000] loss0.055-|Sample:11.26|
EPOCH[188/1000] loss0.055-|Sample:10.67|
EPOCH[189/1000] loss0.055-|Sample:10.73|
EPOCH[190/1000] loss0.055-|Sample:10.97|
[TEST]
{'precision': array([0.02375742]), 'recall': array([0.05333227]), 'ndcg': array([0.04271082])}
EPOCH[191/1000] loss0.055-|Sample:11.22|
EPOCH[192/1000] loss0.055-|Sample:10.28|
EPOCH[193/1000] loss0.055-|Sample:10.81|
EPOCH[194/1000] loss0.055-|Sample:11.36|
EPOCH[195/1000] loss0.055-|Sample:10.70|
EPOCH[196/1000] loss0.055-|Sample:10.90|
EPOCH[197/1000] loss0.055-|Sample:10.90|
EPOCH[198/1000] loss0.055-|Sample:10.92|
EPOCH[199/1000] loss0.055-|Sample:11.43|
EPOCH[200/1000] loss0.055-|Sample:10.98|
[TEST]
{'precision': array([0.0238711]), 'recall': array([0.0536164]), 'ndcg': array([0.04296654])}
EPOCH[201/1000] loss0.055-|Sample:10.84|
EPOCH[202/1000] loss0.055-|Sample:11.84|
EPOCH[203/1000] loss0.054-|Sample:10.70|
EPOCH[204/1000] loss0.054-|Sample:10.92|
EPOCH[205/1000] loss0.054-|Sample:10.95|
EPOCH[206/1000] loss0.054-|Sample:10.79|
EPOCH[207/1000] loss0.054-|Sample:10.98|
EPOCH[208/1000] loss0.054-|Sample:10.28|
EPOCH[209/1000] loss0.054-|Sample:10.98|
EPOCH[210/1000] loss0.054-|Sample:10.67|
[TEST]
{'precision': array([0.02399267]), 'recall': array([0.05382464]), 'ndcg': array([0.04316271])}
EPOCH[211/1000] loss0.054-|Sample:10.87|
EPOCH[212/1000] loss0.054-|Sample:11.04|
EPOCH[213/1000] loss0.054-|Sample:10.65|
EPOCH[214/1000] loss0.054-|Sample:11.00|
EPOCH[215/1000] loss0.053-|Sample:11.25|
EPOCH[216/1000] loss0.054-|Sample:11.31|
EPOCH[217/1000] loss0.053-|Sample:11.08|
EPOCH[218/1000] loss0.054-|Sample:10.78|
EPOCH[219/1000] loss0.053-|Sample:10.98|
EPOCH[220/1000] loss0.053-|Sample:12.48|
[TEST]
{'precision': array([0.02416319]), 'recall': array([0.05419767]), 'ndcg': array([0.04342933])}
EPOCH[221/1000] loss0.053-|Sample:11.34|
EPOCH[222/1000] loss0.053-|Sample:11.28|
EPOCH[223/1000] loss0.053-|Sample:10.93|
EPOCH[224/1000] loss0.053-|Sample:11.26|
EPOCH[225/1000] loss0.053-|Sample:11.51|
EPOCH[226/1000] loss0.053-|Sample:11.78|
EPOCH[227/1000] loss0.053-|Sample:11.64|
EPOCH[228/1000] loss0.053-|Sample:11.22|
EPOCH[229/1000] loss0.053-|Sample:11.17|
EPOCH[230/1000] loss0.053-|Sample:10.84|
[TEST]
{'precision': array([0.02438108]), 'recall': array([0.05459056]), 'ndcg': array([0.04379641])}
EPOCH[231/1000] loss0.053-|Sample:10.29|
EPOCH[232/1000] loss0.053-|Sample:12.06|
EPOCH[233/1000] loss0.052-|Sample:10.93|
EPOCH[234/1000] loss0.053-|Sample:10.75|
EPOCH[235/1000] loss0.052-|Sample:11.86|
EPOCH[236/1000] loss0.053-|Sample:10.72|
EPOCH[237/1000] loss0.053-|Sample:11.37|
EPOCH[238/1000] loss0.052-|Sample:11.48|
EPOCH[239/1000] loss0.053-|Sample:11.06|
EPOCH[240/1000] loss0.053-|Sample:10.87|
[TEST]
{'precision': array([0.02452949]), 'recall': array([0.05515149]), 'ndcg': array([0.04406898])}
EPOCH[241/1000] loss0.052-|Sample:10.90|
EPOCH[242/1000] loss0.052-|Sample:10.93|
EPOCH[243/1000] loss0.052-|Sample:12.29|
EPOCH[244/1000] loss0.052-|Sample:11.64|
EPOCH[245/1000] loss0.052-|Sample:10.97|
EPOCH[246/1000] loss0.052-|Sample:11.00|
EPOCH[247/1000] loss0.052-|Sample:10.22|
EPOCH[248/1000] loss0.052-|Sample:11.73|
EPOCH[249/1000] loss0.052-|Sample:10.97|
EPOCH[250/1000] loss0.052-|Sample:11.53|
[TEST]
{'precision': array([0.02458002]), 'recall': array([0.05509189]), 'ndcg': array([0.04418197])}
EPOCH[251/1000] loss0.052-|Sample:10.26|
EPOCH[252/1000] loss0.052-|Sample:11.06|
EPOCH[253/1000] loss0.052-|Sample:10.73|
EPOCH[254/1000] loss0.052-|Sample:11.58|
EPOCH[255/1000] loss0.052-|Sample:11.14|
EPOCH[256/1000] loss0.052-|Sample:11.11|
EPOCH[257/1000] loss0.051-|Sample:11.06|
EPOCH[258/1000] loss0.051-|Sample:10.64|
EPOCH[259/1000] loss0.051-|Sample:10.78|
EPOCH[260/1000] loss0.052-|Sample:11.01|
[TEST]
{'precision': array([0.02483264]), 'recall': array([0.05559955]), 'ndcg': array([0.04452448])}
EPOCH[261/1000] loss0.052-|Sample:11.04|
EPOCH[262/1000] loss0.052-|Sample:11.01|
EPOCH[263/1000] loss0.052-|Sample:10.23|
EPOCH[264/1000] loss0.051-|Sample:11.18|
EPOCH[265/1000] loss0.051-|Sample:11.11|
EPOCH[266/1000] loss0.051-|Sample:10.90|
EPOCH[267/1000] loss0.051-|Sample:11.93|
EPOCH[268/1000] loss0.051-|Sample:10.93|
EPOCH[269/1000] loss0.051-|Sample:11.58|
EPOCH[270/1000] loss0.051-|Sample:11.28|
[TEST]
{'precision': array([0.02482474]), 'recall': array([0.05569642]), 'ndcg': array([0.04460413])}
EPOCH[271/1000] loss0.051-|Sample:11.01|
EPOCH[272/1000] loss0.051-|Sample:11.11|
EPOCH[273/1000] loss0.051-|Sample:11.03|
EPOCH[274/1000] loss0.051-|Sample:11.15|
EPOCH[275/1000] loss0.051-|Sample:11.04|
EPOCH[276/1000] loss0.051-|Sample:10.01|
EPOCH[277/1000] loss0.051-|Sample:11.09|
EPOCH[278/1000] loss0.050-|Sample:10.86|
EPOCH[279/1000] loss0.051-|Sample:10.73|
EPOCH[280/1000] loss0.051-|Sample:10.86|
[TEST]
{'precision': array([0.02489737]), 'recall': array([0.05580729]), 'ndcg': array([0.04471779])}
EPOCH[281/1000] loss0.051-|Sample:10.93|
EPOCH[282/1000] loss0.051-|Sample:11.01|
EPOCH[283/1000] loss0.051-|Sample:10.70|
EPOCH[284/1000] loss0.051-|Sample:12.54|
EPOCH[285/1000] loss0.051-|Sample:11.84|
EPOCH[286/1000] loss0.051-|Sample:12.65|
EPOCH[287/1000] loss0.050-|Sample:11.45|
EPOCH[288/1000] loss0.051-|Sample:10.81|
EPOCH[289/1000] loss0.050-|Sample:10.92|
EPOCH[290/1000] loss0.051-|Sample:11.03|
[TEST]
{'precision': array([0.02502842]), 'recall': array([0.05612277]), 'ndcg': array([0.04497762])}
EPOCH[291/1000] loss0.050-|Sample:12.70|
EPOCH[292/1000] loss0.050-|Sample:10.86|
EPOCH[293/1000] loss0.050-|Sample:11.29|
EPOCH[294/1000] loss0.050-|Sample:10.92|
EPOCH[295/1000] loss0.050-|Sample:10.84|
EPOCH[296/1000] loss0.050-|Sample:12.08|
EPOCH[297/1000] loss0.050-|Sample:10.75|
EPOCH[298/1000] loss0.050-|Sample:10.97|
EPOCH[299/1000] loss0.050-|Sample:10.92|
EPOCH[300/1000] loss0.050-|Sample:10.87|
[TEST]
{'precision': array([0.02517999]), 'recall': array([0.05642651]), 'ndcg': array([0.04520655])}
EPOCH[301/1000] loss0.050-|Sample:10.78|
EPOCH[302/1000] loss0.050-|Sample:10.76|
EPOCH[303/1000] loss0.050-|Sample:12.29|
EPOCH[304/1000] loss0.050-|Sample:10.87|
EPOCH[305/1000] loss0.050-|Sample:10.93|
EPOCH[306/1000] loss0.050-|Sample:10.93|
EPOCH[307/1000] loss0.050-|Sample:10.92|
EPOCH[308/1000] loss0.050-|Sample:10.79|
EPOCH[309/1000] loss0.050-|Sample:10.87|
EPOCH[310/1000] loss0.050-|Sample:10.00|
[TEST]
{'precision': array([0.02520525]), 'recall': array([0.05651131]), 'ndcg': array([0.04537095])}
EPOCH[311/1000] loss0.049-|Sample:10.92|
EPOCH[312/1000] loss0.050-|Sample:11.54|
EPOCH[313/1000] loss0.049-|Sample:10.86|
EPOCH[314/1000] loss0.049-|Sample:10.93|
EPOCH[315/1000] loss0.050-|Sample:12.20|
EPOCH[316/1000] loss0.049-|Sample:10.81|
EPOCH[317/1000] loss0.050-|Sample:11.29|
EPOCH[318/1000] loss0.050-|Sample:11.72|
EPOCH[319/1000] loss0.049-|Sample:11.30|
EPOCH[320/1000] loss0.049-|Sample:10.78|
[TEST]
{'precision': array([0.02526525]), 'recall': array([0.05648296]), 'ndcg': array([0.04541827])}
EPOCH[321/1000] loss0.049-|Sample:11.01|
EPOCH[322/1000] loss0.049-|Sample:12.14|
EPOCH[323/1000] loss0.049-|Sample:10.97|
EPOCH[324/1000] loss0.049-|Sample:11.01|
EPOCH[325/1000] loss0.049-|Sample:11.00|
EPOCH[326/1000] loss0.049-|Sample:10.97|
EPOCH[327/1000] loss0.049-|Sample:10.87|
EPOCH[328/1000] loss0.049-|Sample:11.06|
EPOCH[329/1000] loss0.049-|Sample:10.89|
EPOCH[330/1000] loss0.049-|Sample:11.22|
[TEST]
{'precision': array([0.02532683]), 'recall': array([0.05674329]), 'ndcg': array([0.04569614])}
EPOCH[331/1000] loss0.049-|Sample:10.78|
EPOCH[332/1000] loss0.049-|Sample:12.08|
EPOCH[333/1000] loss0.049-|Sample:11.43|
EPOCH[334/1000] loss0.049-|Sample:11.08|
EPOCH[335/1000] loss0.049-|Sample:11.39|
EPOCH[336/1000] loss0.049-|Sample:10.73|
EPOCH[337/1000] loss0.049-|Sample:10.83|
EPOCH[338/1000] loss0.049-|Sample:10.66|
EPOCH[339/1000] loss0.049-|Sample:10.92|
EPOCH[340/1000] loss0.049-|Sample:10.62|
[TEST]
{'precision': array([0.02537577]), 'recall': array([0.05690275]), 'ndcg': array([0.04572502])}
EPOCH[341/1000] loss0.049-|Sample:11.50|
EPOCH[342/1000] loss0.049-|Sample:11.04|
EPOCH[343/1000] loss0.049-|Sample:10.93|
EPOCH[344/1000] loss0.049-|Sample:10.92|
EPOCH[345/1000] loss0.048-|Sample:10.79|
EPOCH[346/1000] loss0.049-|Sample:11.15|
EPOCH[347/1000] loss0.048-|Sample:10.70|
EPOCH[348/1000] loss0.049-|Sample:11.34|
EPOCH[349/1000] loss0.049-|Sample:11.09|
EPOCH[350/1000] loss0.049-|Sample:12.11|
[TEST]
{'precision': array([0.02557313]), 'recall': array([0.05727335]), 'ndcg': array([0.04605714])}
EPOCH[351/1000] loss0.048-|Sample:11.23|
EPOCH[352/1000] loss0.049-|Sample:11.36|
EPOCH[353/1000] loss0.049-|Sample:10.70|
EPOCH[354/1000] loss0.048-|Sample:11.15|
EPOCH[355/1000] loss0.048-|Sample:10.64|
EPOCH[356/1000] loss0.048-|Sample:10.58|
EPOCH[357/1000] loss0.048-|Sample:10.36|
EPOCH[358/1000] loss0.048-|Sample:12.67|
EPOCH[359/1000] loss0.048-|Sample:10.54|
EPOCH[360/1000] loss0.048-|Sample:10.33|
[TEST]
{'precision': array([0.02556366]), 'recall': array([0.05720242]), 'ndcg': array([0.0460264])}
EPOCH[361/1000] loss0.048-|Sample:10.53|
EPOCH[362/1000] loss0.048-|Sample:9.89|
EPOCH[363/1000] loss0.048-|Sample:11.86|
EPOCH[364/1000] loss0.048-|Sample:10.70|
EPOCH[365/1000] loss0.048-|Sample:9.72|
EPOCH[366/1000] loss0.048-|Sample:8.94|
EPOCH[367/1000] loss0.048-|Sample:9.12|
EPOCH[368/1000] loss0.048-|Sample:8.92|
EPOCH[369/1000] loss0.048-|Sample:9.34|
EPOCH[370/1000] loss0.048-|Sample:9.12|
[TEST]
{'precision': array([0.0256426]), 'recall': array([0.05735133]), 'ndcg': array([0.04612328])}
EPOCH[371/1000] loss0.048-|Sample:8.65|
EPOCH[372/1000] loss0.048-|Sample:8.64|
EPOCH[373/1000] loss0.048-|Sample:8.76|
EPOCH[374/1000] loss0.048-|Sample:8.97|
EPOCH[375/1000] loss0.048-|Sample:8.98|
EPOCH[376/1000] loss0.048-|Sample:8.81|
EPOCH[377/1000] loss0.048-|Sample:9.37|
EPOCH[378/1000] loss0.048-|Sample:9.40|
EPOCH[379/1000] loss0.048-|Sample:8.90|
EPOCH[380/1000] loss0.048-|Sample:9.12|
[TEST]
{'precision': array([0.02572944]), 'recall': array([0.05763106]), 'ndcg': array([0.04637981])}
EPOCH[381/1000] loss0.048-|Sample:8.97|
EPOCH[382/1000] loss0.048-|Sample:9.06|
EPOCH[383/1000] loss0.048-|Sample:9.01|
EPOCH[384/1000] loss0.048-|Sample:9.00|
EPOCH[385/1000] loss0.048-|Sample:9.08|
EPOCH[386/1000] loss0.048-|Sample:8.75|
EPOCH[387/1000] loss0.048-|Sample:9.14|
EPOCH[388/1000] loss0.047-|Sample:8.95|
EPOCH[389/1000] loss0.047-|Sample:9.33|
EPOCH[390/1000] loss0.047-|Sample:8.86|
[TEST]
{'precision': array([0.0256505]), 'recall': array([0.05746882]), 'ndcg': array([0.04618772])}
EPOCH[391/1000] loss0.048-|Sample:8.94|
EPOCH[392/1000] loss0.047-|Sample:8.98|
EPOCH[393/1000] loss0.047-|Sample:8.95|
EPOCH[394/1000] loss0.047-|Sample:9.28|
EPOCH[395/1000] loss0.047-|Sample:9.17|
EPOCH[396/1000] loss0.047-|Sample:8.89|
EPOCH[397/1000] loss0.048-|Sample:9.08|
EPOCH[398/1000] loss0.047-|Sample:9.19|
EPOCH[399/1000] loss0.047-|Sample:9.23|
EPOCH[400/1000] loss0.047-|Sample:9.17|
[TEST]
{'precision': array([0.02578312]), 'recall': array([0.05779078]), 'ndcg': array([0.04642811])}
EPOCH[401/1000] loss0.047-|Sample:9.19|
EPOCH[402/1000] loss0.047-|Sample:8.98|
EPOCH[403/1000] loss0.047-|Sample:9.15|
EPOCH[404/1000] loss0.047-|Sample:8.97|
EPOCH[405/1000] loss0.048-|Sample:8.92|
EPOCH[406/1000] loss0.047-|Sample:8.95|
EPOCH[407/1000] loss0.047-|Sample:8.97|
EPOCH[408/1000] loss0.047-|Sample:8.90|
EPOCH[409/1000] loss0.047-|Sample:9.03|
EPOCH[410/1000] loss0.047-|Sample:8.89|
[TEST]
{'precision': array([0.02592838]), 'recall': array([0.05807858]), 'ndcg': array([0.04668442])}
EPOCH[411/1000] loss0.047-|Sample:9.23|
EPOCH[412/1000] loss0.047-|Sample:8.97|
EPOCH[413/1000] loss0.047-|Sample:9.14|
EPOCH[414/1000] loss0.047-|Sample:8.90|
EPOCH[415/1000] loss0.047-|Sample:9.03|
EPOCH[416/1000] loss0.047-|Sample:8.90|
EPOCH[417/1000] loss0.047-|Sample:8.87|
EPOCH[418/1000] loss0.047-|Sample:9.11|
EPOCH[419/1000] loss0.047-|Sample:9.22|
EPOCH[420/1000] loss0.047-|Sample:8.98|
[TEST]
{'precision': array([0.02592365]), 'recall': array([0.05802371]), 'ndcg': array([0.04669687])}
EPOCH[421/1000] loss0.047-|Sample:8.97|
EPOCH[422/1000] loss0.047-|Sample:8.90|
EPOCH[423/1000] loss0.047-|Sample:8.89|
EPOCH[424/1000] loss0.047-|Sample:8.97|
EPOCH[425/1000] loss0.047-|Sample:9.11|
EPOCH[426/1000] loss0.047-|Sample:9.00|
EPOCH[427/1000] loss0.047-|Sample:9.70|
EPOCH[428/1000] loss0.047-|Sample:8.83|
EPOCH[429/1000] loss0.046-|Sample:8.97|
EPOCH[430/1000] loss0.047-|Sample:8.84|
[TEST]
{'precision': array([0.02601364]), 'recall': array([0.05826609]), 'ndcg': array([0.04683227])}
EPOCH[431/1000] loss0.047-|Sample:8.98|
EPOCH[432/1000] loss0.047-|Sample:8.87|
EPOCH[433/1000] loss0.047-|Sample:8.94|
EPOCH[434/1000] loss0.047-|Sample:8.62|
EPOCH[435/1000] loss0.047-|Sample:9.12|
EPOCH[436/1000] loss0.047-|Sample:8.98|
EPOCH[437/1000] loss0.047-|Sample:8.75|
EPOCH[438/1000] loss0.047-|Sample:8.62|
EPOCH[439/1000] loss0.046-|Sample:8.75|
EPOCH[440/1000] loss0.047-|Sample:9.11|
[TEST]
{'precision': array([0.02598522]), 'recall': array([0.05831151]), 'ndcg': array([0.0468343])}
EPOCH[441/1000] loss0.047-|Sample:9.17|
EPOCH[442/1000] loss0.047-|Sample:9.01|
EPOCH[443/1000] loss0.046-|Sample:9.12|
EPOCH[444/1000] loss0.047-|Sample:9.42|
EPOCH[445/1000] loss0.046-|Sample:9.08|
EPOCH[446/1000] loss0.046-|Sample:9.08|
EPOCH[447/1000] loss0.046-|Sample:9.06|
EPOCH[448/1000] loss0.046-|Sample:9.17|
EPOCH[449/1000] loss0.047-|Sample:9.09|
EPOCH[450/1000] loss0.047-|Sample:8.73|
[TEST]
{'precision': array([0.02610364]), 'recall': array([0.05849845]), 'ndcg': array([0.0470648])}
EPOCH[451/1000] loss0.046-|Sample:8.81|
EPOCH[452/1000] loss0.046-|Sample:9.33|
EPOCH[453/1000] loss0.046-|Sample:9.15|
EPOCH[454/1000] loss0.046-|Sample:8.83|
EPOCH[455/1000] loss0.046-|Sample:8.70|
EPOCH[456/1000] loss0.046-|Sample:8.73|
EPOCH[457/1000] loss0.046-|Sample:8.09|
EPOCH[458/1000] loss0.046-|Sample:7.75|
EPOCH[459/1000] loss0.046-|Sample:8.08|
EPOCH[460/1000] loss0.046-|Sample:8.97|
[TEST]
{'precision': array([0.02605627]), 'recall': array([0.0584271]), 'ndcg': array([0.04699108])}
EPOCH[461/1000] loss0.046-|Sample:8.61|
EPOCH[462/1000] loss0.046-|Sample:8.14|
EPOCH[463/1000] loss0.046-|Sample:7.83|
EPOCH[464/1000] loss0.046-|Sample:7.81|
EPOCH[465/1000] loss0.046-|Sample:8.06|
EPOCH[466/1000] loss0.046-|Sample:8.00|
EPOCH[467/1000] loss0.046-|Sample:8.03|
EPOCH[468/1000] loss0.046-|Sample:8.86|
EPOCH[469/1000] loss0.046-|Sample:8.81|
EPOCH[470/1000] loss0.046-|Sample:8.09|
[TEST]
{'precision': array([0.02625521]), 'recall': array([0.05886324]), 'ndcg': array([0.04733698])}
EPOCH[471/1000] loss0.046-|Sample:7.98|
EPOCH[472/1000] loss0.046-|Sample:7.72|
EPOCH[473/1000] loss0.046-|Sample:7.94|
EPOCH[474/1000] loss0.046-|Sample:8.70|
EPOCH[475/1000] loss0.046-|Sample:8.78|
EPOCH[476/1000] loss0.046-|Sample:8.61|
EPOCH[477/1000] loss0.046-|Sample:7.89|
EPOCH[478/1000] loss0.046-|Sample:7.87|
EPOCH[479/1000] loss0.046-|Sample:8.20|
EPOCH[480/1000] loss0.046-|Sample:7.72|
[TEST]
{'precision': array([0.02619837]), 'recall': array([0.0588078]), 'ndcg': array([0.0473092])}
EPOCH[481/1000] loss0.046-|Sample:7.97|
EPOCH[482/1000] loss0.046-|Sample:8.78|
EPOCH[483/1000] loss0.046-|Sample:8.92|
EPOCH[484/1000] loss0.046-|Sample:7.97|
EPOCH[485/1000] loss0.046-|Sample:7.98|
EPOCH[486/1000] loss0.046-|Sample:7.70|
EPOCH[487/1000] loss0.046-|Sample:8.81|
EPOCH[488/1000] loss0.046-|Sample:7.92|
EPOCH[489/1000] loss0.046-|Sample:8.86|
EPOCH[490/1000] loss0.046-|Sample:8.78|
[TEST]
{'precision': array([0.02622679]), 'recall': array([0.05878514]), 'ndcg': array([0.04728147])}
EPOCH[491/1000] loss0.046-|Sample:9.28|
EPOCH[492/1000] loss0.046-|Sample:9.08|
EPOCH[493/1000] loss0.046-|Sample:8.73|
EPOCH[494/1000] loss0.046-|Sample:8.75|
EPOCH[495/1000] loss0.046-|Sample:9.01|
EPOCH[496/1000] loss0.046-|Sample:8.92|
EPOCH[497/1000] loss0.046-|Sample:8.40|
EPOCH[498/1000] loss0.046-|Sample:8.44|
EPOCH[499/1000] loss0.045-|Sample:8.61|
EPOCH[500/1000] loss0.046-|Sample:8.44|
[TEST]
{'precision': array([0.02629942]), 'recall': array([0.05892827]), 'ndcg': array([0.04748212])}
EPOCH[501/1000] loss0.046-|Sample:8.62|
EPOCH[502/1000] loss0.045-|Sample:8.69|
EPOCH[503/1000] loss0.045-|Sample:7.76|
EPOCH[504/1000] loss0.046-|Sample:7.55|
EPOCH[505/1000] loss0.046-|Sample:7.69|
EPOCH[506/1000] loss0.045-|Sample:7.51|
EPOCH[507/1000] loss0.046-|Sample:7.64|
EPOCH[508/1000] loss0.045-|Sample:7.62|
EPOCH[509/1000] loss0.046-|Sample:7.73|
EPOCH[510/1000] loss0.046-|Sample:7.61|
[TEST]
{'precision': array([0.02635468]), 'recall': array([0.05915533]), 'ndcg': array([0.04757719])}
EPOCH[511/1000] loss0.046-|Sample:7.72|
EPOCH[512/1000] loss0.046-|Sample:7.64|
EPOCH[513/1000] loss0.046-|Sample:7.64|
EPOCH[514/1000] loss0.046-|Sample:7.56|
EPOCH[515/1000] loss0.046-|Sample:7.76|
EPOCH[516/1000] loss0.045-|Sample:7.53|
EPOCH[517/1000] loss0.045-|Sample:7.84|
EPOCH[518/1000] loss0.046-|Sample:7.50|
EPOCH[519/1000] loss0.046-|Sample:8.36|
EPOCH[520/1000] loss0.046-|Sample:8.01|
[TEST]
{'precision': array([0.02635152]), 'recall': array([0.05905602]), 'ndcg': array([0.04758827])}
EPOCH[521/1000] loss0.045-|Sample:7.80|
EPOCH[522/1000] loss0.046-|Sample:7.86|
EPOCH[523/1000] loss0.046-|Sample:7.86|
EPOCH[524/1000] loss0.045-|Sample:7.86|
EPOCH[525/1000] loss0.045-|Sample:7.62|
EPOCH[526/1000] loss0.046-|Sample:7.64|
EPOCH[527/1000] loss0.046-|Sample:8.19|
EPOCH[528/1000] loss0.045-|Sample:7.92|
EPOCH[529/1000] loss0.046-|Sample:7.61|
EPOCH[530/1000] loss0.045-|Sample:7.65|
[TEST]
{'precision': array([0.02642889]), 'recall': array([0.05925203]), 'ndcg': array([0.04766336])}
EPOCH[531/1000] loss0.045-|Sample:7.64|
EPOCH[532/1000] loss0.045-|Sample:7.75|
EPOCH[533/1000] loss0.045-|Sample:7.53|
EPOCH[534/1000] loss0.045-|Sample:7.83|
EPOCH[535/1000] loss0.045-|Sample:7.62|
EPOCH[536/1000] loss0.045-|Sample:7.64|
EPOCH[537/1000] loss0.045-|Sample:7.81|
EPOCH[538/1000] loss0.045-|Sample:7.83|
EPOCH[539/1000] loss0.045-|Sample:7.78|
EPOCH[540/1000] loss0.046-|Sample:7.53|
[TEST]
{'precision': array([0.02656625]), 'recall': array([0.05954892]), 'ndcg': array([0.04786413])}
EPOCH[541/1000] loss0.045-|Sample:7.55|
EPOCH[542/1000] loss0.045-|Sample:7.78|
EPOCH[543/1000] loss0.045-|Sample:7.61|
EPOCH[544/1000] loss0.045-|Sample:7.58|
EPOCH[545/1000] loss0.045-|Sample:7.73|
EPOCH[546/1000] loss0.045-|Sample:7.50|
EPOCH[547/1000] loss0.045-|Sample:7.76|
EPOCH[548/1000] loss0.045-|Sample:7.55|
EPOCH[549/1000] loss0.045-|Sample:7.94|
EPOCH[550/1000] loss0.045-|Sample:7.59|
[TEST]
{'precision': array([0.02655046]), 'recall': array([0.05946736]), 'ndcg': array([0.04778854])}
EPOCH[551/1000] loss0.045-|Sample:7.76|
EPOCH[552/1000] loss0.045-|Sample:7.58|
EPOCH[553/1000] loss0.045-|Sample:7.83|
EPOCH[554/1000] loss0.045-|Sample:7.65|
EPOCH[555/1000] loss0.045-|Sample:7.80|
EPOCH[556/1000] loss0.045-|Sample:7.76|
EPOCH[557/1000] loss0.045-|Sample:7.56|
EPOCH[558/1000] loss0.045-|Sample:7.59|
EPOCH[559/1000] loss0.045-|Sample:7.89|
EPOCH[560/1000] loss0.045-|Sample:8.15|
[TEST]
{'precision': array([0.02653625]), 'recall': array([0.05943139]), 'ndcg': array([0.04777807])}
EPOCH[561/1000] loss0.045-|Sample:7.97|
EPOCH[562/1000] loss0.045-|Sample:7.58|
EPOCH[563/1000] loss0.045-|Sample:8.23|
EPOCH[564/1000] loss0.045-|Sample:7.51|
EPOCH[565/1000] loss0.045-|Sample:7.56|
EPOCH[566/1000] loss0.045-|Sample:7.72|
EPOCH[567/1000] loss0.045-|Sample:7.75|
EPOCH[568/1000] loss0.045-|Sample:7.73|
EPOCH[569/1000] loss0.045-|Sample:7.56|
EPOCH[570/1000] loss0.045-|Sample:7.67|
[TEST]
{'precision': array([0.0265252]), 'recall': array([0.0594493]), 'ndcg': array([0.04777914])}
EPOCH[571/1000] loss0.045-|Sample:7.62|
EPOCH[572/1000] loss0.045-|Sample:7.51|
EPOCH[573/1000] loss0.045-|Sample:7.81|
EPOCH[574/1000] loss0.045-|Sample:7.53|
EPOCH[575/1000] loss0.045-|Sample:7.62|
EPOCH[576/1000] loss0.045-|Sample:7.48|
EPOCH[577/1000] loss0.045-|Sample:7.81|
EPOCH[578/1000] loss0.045-|Sample:7.58|
EPOCH[579/1000] loss0.045-|Sample:7.56|
EPOCH[580/1000] loss0.045-|Sample:7.64|
[TEST]
{'precision': array([0.02661677]), 'recall': array([0.0595376]), 'ndcg': array([0.04786893])}
EPOCH[581/1000] loss0.045-|Sample:7.65|
EPOCH[582/1000] loss0.045-|Sample:8.09|
EPOCH[583/1000] loss0.045-|Sample:7.50|
EPOCH[584/1000] loss0.045-|Sample:7.87|
EPOCH[585/1000] loss0.045-|Sample:7.59|
EPOCH[586/1000] loss0.045-|Sample:7.61|
EPOCH[587/1000] loss0.045-|Sample:8.22|
EPOCH[588/1000] loss0.045-|Sample:7.65|
EPOCH[589/1000] loss0.045-|Sample:7.83|
EPOCH[590/1000] loss0.045-|Sample:7.53|
[TEST]
{'precision': array([0.02660256]), 'recall': array([0.05951485]), 'ndcg': array([0.04797509])}
EPOCH[591/1000] loss0.045-|Sample:7.64|
EPOCH[592/1000] loss0.045-|Sample:7.83|
EPOCH[593/1000] loss0.045-|Sample:7.92|
EPOCH[594/1000] loss0.044-|Sample:7.51|
EPOCH[595/1000] loss0.045-|Sample:8.14|
EPOCH[596/1000] loss0.045-|Sample:7.65|
EPOCH[597/1000] loss0.045-|Sample:8.03|
EPOCH[598/1000] loss0.045-|Sample:7.58|
EPOCH[599/1000] loss0.045-|Sample:7.67|
EPOCH[600/1000] loss0.045-|Sample:7.69|
[TEST]
{'precision': array([0.02667046]), 'recall': array([0.05959676]), 'ndcg': array([0.04802441])}
EPOCH[601/1000] loss0.044-|Sample:7.56|
EPOCH[602/1000] loss0.045-|Sample:7.62|
EPOCH[603/1000] loss0.045-|Sample:7.62|
EPOCH[604/1000] loss0.045-|Sample:7.76|
EPOCH[605/1000] loss0.045-|Sample:7.65|
EPOCH[606/1000] loss0.045-|Sample:7.92|
EPOCH[607/1000] loss0.045-|Sample:7.95|
EPOCH[608/1000] loss0.044-|Sample:7.61|
EPOCH[609/1000] loss0.045-|Sample:7.78|
EPOCH[610/1000] loss0.044-|Sample:7.92|
[TEST]
{'precision': array([0.02669888]), 'recall': array([0.05970369]), 'ndcg': array([0.04813511])}
EPOCH[611/1000] loss0.045-|Sample:7.90|
EPOCH[612/1000] loss0.045-|Sample:7.62|
EPOCH[613/1000] loss0.044-|Sample:7.78|
EPOCH[614/1000] loss0.044-|Sample:7.58|
EPOCH[615/1000] loss0.044-|Sample:7.69|
EPOCH[616/1000] loss0.044-|Sample:7.59|
EPOCH[617/1000] loss0.045-|Sample:7.69|
EPOCH[618/1000] loss0.045-|Sample:7.73|
EPOCH[619/1000] loss0.044-|Sample:8.00|
EPOCH[620/1000] loss0.044-|Sample:7.75|
[TEST]
{'precision': array([0.02673519]), 'recall': array([0.05977997]), 'ndcg': array([0.04812472])}
EPOCH[621/1000] loss0.044-|Sample:7.51|
EPOCH[622/1000] loss0.044-|Sample:7.69|
EPOCH[623/1000] loss0.045-|Sample:7.72|
EPOCH[624/1000] loss0.044-|Sample:7.51|
EPOCH[625/1000] loss0.044-|Sample:7.81|
EPOCH[626/1000] loss0.045-|Sample:7.80|
EPOCH[627/1000] loss0.044-|Sample:7.75|
EPOCH[628/1000] loss0.044-|Sample:7.78|
EPOCH[629/1000] loss0.044-|Sample:7.65|
EPOCH[630/1000] loss0.045-|Sample:7.61|
[TEST]
{'precision': array([0.02674308]), 'recall': array([0.05972794]), 'ndcg': array([0.04818507])}
EPOCH[631/1000] loss0.045-|Sample:7.62|
EPOCH[632/1000] loss0.044-|Sample:7.62|
EPOCH[633/1000] loss0.044-|Sample:7.72|
EPOCH[634/1000] loss0.045-|Sample:7.83|
EPOCH[635/1000] loss0.045-|Sample:7.72|
EPOCH[636/1000] loss0.044-|Sample:7.51|
EPOCH[637/1000] loss0.045-|Sample:7.76|
EPOCH[638/1000] loss0.044-|Sample:7.56|
EPOCH[639/1000] loss0.044-|Sample:7.94|
EPOCH[640/1000] loss0.044-|Sample:7.87|
[TEST]
{'precision': array([0.02680624]), 'recall': array([0.05990391]), 'ndcg': array([0.04828022])}
EPOCH[641/1000] loss0.044-|Sample:7.62|
EPOCH[642/1000] loss0.044-|Sample:7.94|
EPOCH[643/1000] loss0.044-|Sample:7.64|
EPOCH[644/1000] loss0.045-|Sample:7.67|
EPOCH[645/1000] loss0.044-|Sample:7.69|
EPOCH[646/1000] loss0.044-|Sample:7.61|
EPOCH[647/1000] loss0.044-|Sample:7.76|
EPOCH[648/1000] loss0.045-|Sample:7.78|
EPOCH[649/1000] loss0.044-|Sample:7.61|
EPOCH[650/1000] loss0.045-|Sample:7.51|
[TEST]
{'precision': array([0.02682045]), 'recall': array([0.0599206]), 'ndcg': array([0.04838734])}
EPOCH[651/1000] loss0.044-|Sample:7.64|
EPOCH[652/1000] loss0.044-|Sample:7.72|
EPOCH[653/1000] loss0.044-|Sample:7.69|
EPOCH[654/1000] loss0.044-|Sample:7.56|
EPOCH[655/1000] loss0.044-|Sample:7.64|
EPOCH[656/1000] loss0.044-|Sample:7.56|
EPOCH[657/1000] loss0.044-|Sample:7.72|
EPOCH[658/1000] loss0.044-|Sample:7.70|
EPOCH[659/1000] loss0.044-|Sample:7.81|
EPOCH[660/1000] loss0.044-|Sample:7.64|
[TEST]
{'precision': array([0.02690413]), 'recall': array([0.06004348]), 'ndcg': array([0.04847118])}
EPOCH[661/1000] loss0.044-|Sample:7.72|
EPOCH[662/1000] loss0.044-|Sample:7.65|
EPOCH[663/1000] loss0.044-|Sample:7.70|
EPOCH[664/1000] loss0.044-|Sample:7.58|
EPOCH[665/1000] loss0.044-|Sample:7.51|
EPOCH[666/1000] loss0.044-|Sample:7.50|
EPOCH[667/1000] loss0.044-|Sample:7.87|
EPOCH[668/1000] loss0.044-|Sample:7.81|
EPOCH[669/1000] loss0.044-|Sample:7.59|
EPOCH[670/1000] loss0.044-|Sample:7.55|
[TEST]
{'precision': array([0.02700834]), 'recall': array([0.06037267]), 'ndcg': array([0.04863669])}
EPOCH[671/1000] loss0.044-|Sample:7.61|
EPOCH[672/1000] loss0.044-|Sample:7.75|
EPOCH[673/1000] loss0.044-|Sample:7.78|
EPOCH[674/1000] loss0.044-|Sample:7.69|
EPOCH[675/1000] loss0.044-|Sample:8.03|
EPOCH[676/1000] loss0.044-|Sample:7.65|
EPOCH[677/1000] loss0.044-|Sample:7.76|
EPOCH[678/1000] loss0.044-|Sample:8.17|
EPOCH[679/1000] loss0.044-|Sample:7.76|
EPOCH[680/1000] loss0.044-|Sample:7.58|
[TEST]
{'precision': array([0.02690413]), 'recall': array([0.06019852]), 'ndcg': array([0.04858103])}
EPOCH[681/1000] loss0.044-|Sample:7.62|
EPOCH[682/1000] loss0.044-|Sample:7.92|
EPOCH[683/1000] loss0.044-|Sample:7.80|
EPOCH[684/1000] loss0.044-|Sample:7.65|
EPOCH[685/1000] loss0.044-|Sample:7.87|
EPOCH[686/1000] loss0.044-|Sample:7.58|
EPOCH[687/1000] loss0.044-|Sample:7.70|
EPOCH[688/1000] loss0.044-|Sample:7.61|
EPOCH[689/1000] loss0.044-|Sample:7.70|
EPOCH[690/1000] loss0.044-|Sample:7.73|
[TEST]
{'precision': array([0.02703518]), 'recall': array([0.06052093]), 'ndcg': array([0.04869325])}
EPOCH[691/1000] loss0.044-|Sample:7.61|
EPOCH[692/1000] loss0.044-|Sample:7.67|
EPOCH[693/1000] loss0.044-|Sample:7.58|
EPOCH[694/1000] loss0.044-|Sample:8.03|
EPOCH[695/1000] loss0.044-|Sample:7.69|
EPOCH[696/1000] loss0.044-|Sample:7.58|
EPOCH[697/1000] loss0.044-|Sample:7.76|
EPOCH[698/1000] loss0.044-|Sample:8.15|
EPOCH[699/1000] loss0.044-|Sample:8.23|
EPOCH[700/1000] loss0.044-|Sample:7.81|
[TEST]
{'precision': array([0.02702097]), 'recall': array([0.06042852]), 'ndcg': array([0.04870181])}
EPOCH[701/1000] loss0.044-|Sample:7.98|
EPOCH[702/1000] loss0.044-|Sample:7.89|
EPOCH[703/1000] loss0.044-|Sample:7.80|
EPOCH[704/1000] loss0.044-|Sample:7.61|
EPOCH[705/1000] loss0.044-|Sample:8.20|
EPOCH[706/1000] loss0.044-|Sample:7.86|
EPOCH[707/1000] loss0.044-|Sample:8.06|
EPOCH[708/1000] loss0.044-|Sample:7.62|
EPOCH[709/1000] loss0.044-|Sample:7.90|
EPOCH[710/1000] loss0.044-|Sample:7.53|
[TEST]
{'precision': array([0.02704623]), 'recall': array([0.06047353]), 'ndcg': array([0.04887706])}
EPOCH[711/1000] loss0.044-|Sample:7.64|
EPOCH[712/1000] loss0.044-|Sample:7.56|
EPOCH[713/1000] loss0.044-|Sample:7.76|
EPOCH[714/1000] loss0.044-|Sample:7.51|
EPOCH[715/1000] loss0.044-|Sample:7.70|
EPOCH[716/1000] loss0.044-|Sample:7.59|
EPOCH[717/1000] loss0.044-|Sample:7.64|
EPOCH[718/1000] loss0.044-|Sample:7.67|
EPOCH[719/1000] loss0.044-|Sample:7.78|
EPOCH[720/1000] loss0.044-|Sample:7.65|
[TEST]
{'precision': array([0.02717412]), 'recall': array([0.06076122]), 'ndcg': array([0.04897125])}
EPOCH[721/1000] loss0.044-|Sample:8.08|
EPOCH[722/1000] loss0.044-|Sample:7.59|
EPOCH[723/1000] loss0.044-|Sample:7.59|
EPOCH[724/1000] loss0.044-|Sample:7.72|
EPOCH[725/1000] loss0.044-|Sample:7.75|
EPOCH[726/1000] loss0.044-|Sample:8.01|
EPOCH[727/1000] loss0.044-|Sample:7.86|
EPOCH[728/1000] loss0.044-|Sample:7.67|
EPOCH[729/1000] loss0.044-|Sample:7.90|
EPOCH[730/1000] loss0.044-|Sample:7.76|
[TEST]
{'precision': array([0.02703834]), 'recall': array([0.0604326]), 'ndcg': array([0.04874659])}
EPOCH[731/1000] loss0.044-|Sample:8.15|
EPOCH[732/1000] loss0.044-|Sample:7.97|
EPOCH[733/1000] loss0.044-|Sample:7.90|
EPOCH[734/1000] loss0.044-|Sample:7.70|
EPOCH[735/1000] loss0.044-|Sample:7.62|
EPOCH[736/1000] loss0.044-|Sample:7.62|
EPOCH[737/1000] loss0.044-|Sample:7.62|
EPOCH[738/1000] loss0.043-|Sample:7.62|
EPOCH[739/1000] loss0.044-|Sample:7.78|
EPOCH[740/1000] loss0.044-|Sample:8.14|
[TEST]
{'precision': array([0.02708097]), 'recall': array([0.06067536]), 'ndcg': array([0.04886456])}
EPOCH[741/1000] loss0.044-|Sample:7.70|
EPOCH[742/1000] loss0.044-|Sample:7.45|
EPOCH[743/1000] loss0.044-|Sample:8.19|
EPOCH[744/1000] loss0.044-|Sample:7.56|
EPOCH[745/1000] loss0.044-|Sample:7.72|
EPOCH[746/1000] loss0.044-|Sample:7.48|
EPOCH[747/1000] loss0.044-|Sample:7.73|
EPOCH[748/1000] loss0.044-|Sample:7.87|
EPOCH[749/1000] loss0.044-|Sample:7.72|
EPOCH[750/1000] loss0.044-|Sample:7.59|
[TEST]
{'precision': array([0.02713307]), 'recall': array([0.06061105]), 'ndcg': array([0.04894919])}
EPOCH[751/1000] loss0.044-|Sample:7.58|
EPOCH[752/1000] loss0.044-|Sample:7.80|
EPOCH[753/1000] loss0.044-|Sample:7.47|
EPOCH[754/1000] loss0.044-|Sample:7.65|
EPOCH[755/1000] loss0.044-|Sample:7.65|
EPOCH[756/1000] loss0.044-|Sample:7.58|
EPOCH[757/1000] loss0.044-|Sample:7.67|
EPOCH[758/1000] loss0.043-|Sample:7.80|
EPOCH[759/1000] loss0.044-|Sample:7.90|
EPOCH[760/1000] loss0.044-|Sample:7.69|
[TEST]
{'precision': array([0.02704465]), 'recall': array([0.06043262]), 'ndcg': array([0.04885814])}
EPOCH[761/1000] loss0.044-|Sample:7.97|
EPOCH[762/1000] loss0.044-|Sample:7.64|
EPOCH[763/1000] loss0.044-|Sample:7.62|
EPOCH[764/1000] loss0.043-|Sample:7.59|
EPOCH[765/1000] loss0.044-|Sample:7.76|
EPOCH[766/1000] loss0.044-|Sample:7.90|
EPOCH[767/1000] loss0.044-|Sample:7.83|
EPOCH[768/1000] loss0.044-|Sample:7.80|
EPOCH[769/1000] loss0.044-|Sample:7.80|
EPOCH[770/1000] loss0.044-|Sample:7.73|
[TEST]
{'precision': array([0.02711254]), 'recall': array([0.06056418]), 'ndcg': array([0.04886604])}
EPOCH[771/1000] loss0.043-|Sample:7.53|
EPOCH[772/1000] loss0.043-|Sample:8.12|
EPOCH[773/1000] loss0.043-|Sample:7.72|
EPOCH[774/1000] loss0.044-|Sample:7.56|
EPOCH[775/1000] loss0.044-|Sample:7.59|
EPOCH[776/1000] loss0.044-|Sample:8.04|
EPOCH[777/1000] loss0.043-|Sample:7.69|
EPOCH[778/1000] loss0.043-|Sample:7.69|
EPOCH[779/1000] loss0.044-|Sample:7.86|
EPOCH[780/1000] loss0.044-|Sample:7.80|
[TEST]
{'precision': array([0.02715044]), 'recall': array([0.06071634]), 'ndcg': array([0.04897373])}
EPOCH[781/1000] loss0.043-|Sample:7.61|
EPOCH[782/1000] loss0.044-|Sample:8.01|
EPOCH[783/1000] loss0.044-|Sample:7.69|
EPOCH[784/1000] loss0.043-|Sample:8.08|
EPOCH[785/1000] loss0.044-|Sample:8.08|
EPOCH[786/1000] loss0.044-|Sample:7.75|
EPOCH[787/1000] loss0.044-|Sample:7.59|
EPOCH[788/1000] loss0.044-|Sample:7.92|
EPOCH[789/1000] loss0.044-|Sample:7.86|
EPOCH[790/1000] loss0.044-|Sample:7.58|
[TEST]
{'precision': array([0.02721675]), 'recall': array([0.06095538]), 'ndcg': array([0.0490919])}
EPOCH[791/1000] loss0.044-|Sample:7.51|
EPOCH[792/1000] loss0.044-|Sample:7.61|
EPOCH[793/1000] loss0.044-|Sample:7.72|
EPOCH[794/1000] loss0.044-|Sample:7.64|
EPOCH[795/1000] loss0.044-|Sample:7.62|
EPOCH[796/1000] loss0.044-|Sample:7.59|
EPOCH[797/1000] loss0.043-|Sample:7.73|
EPOCH[798/1000] loss0.044-|Sample:7.62|
EPOCH[799/1000] loss0.043-|Sample:7.72|
EPOCH[800/1000] loss0.043-|Sample:8.09|
[TEST]
{'precision': array([0.02709675]), 'recall': array([0.06056335]), 'ndcg': array([0.04887361])}
EPOCH[801/1000] loss0.044-|Sample:7.55|
EPOCH[802/1000] loss0.043-|Sample:7.51|
EPOCH[803/1000] loss0.044-|Sample:7.64|
EPOCH[804/1000] loss0.044-|Sample:7.75|
EPOCH[805/1000] loss0.044-|Sample:8.17|
EPOCH[806/1000] loss0.044-|Sample:7.92|
EPOCH[807/1000] loss0.043-|Sample:7.78|
EPOCH[808/1000] loss0.043-|Sample:7.70|
EPOCH[809/1000] loss0.043-|Sample:7.61|
EPOCH[810/1000] loss0.044-|Sample:7.80|
[TEST]
{'precision': array([0.02718675]), 'recall': array([0.06073623]), 'ndcg': array([0.04903065])}
EPOCH[811/1000] loss0.044-|Sample:7.67|
EPOCH[812/1000] loss0.043-|Sample:7.78|
EPOCH[813/1000] loss0.043-|Sample:7.58|
EPOCH[814/1000] loss0.043-|Sample:7.81|
EPOCH[815/1000] loss0.043-|Sample:7.73|
EPOCH[816/1000] loss0.043-|Sample:8.15|
EPOCH[817/1000] loss0.043-|Sample:7.89|
EPOCH[818/1000] loss0.044-|Sample:7.73|
EPOCH[819/1000] loss0.043-|Sample:7.58|
EPOCH[820/1000] loss0.044-|Sample:7.95|
[TEST]
{'precision': array([0.02724043]), 'recall': array([0.06085078]), 'ndcg': array([0.04908387])}
EPOCH[821/1000] loss0.043-|Sample:7.73|
EPOCH[822/1000] loss0.043-|Sample:7.75|
EPOCH[823/1000] loss0.043-|Sample:8.12|
EPOCH[824/1000] loss0.043-|Sample:8.22|
EPOCH[825/1000] loss0.044-|Sample:8.17|
EPOCH[826/1000] loss0.044-|Sample:8.23|
EPOCH[827/1000] loss0.044-|Sample:8.11|
EPOCH[828/1000] loss0.044-|Sample:8.22|
EPOCH[829/1000] loss0.043-|Sample:8.31|
EPOCH[830/1000] loss0.043-|Sample:8.01|
[TEST]
{'precision': array([0.02718359]), 'recall': array([0.06077387]), 'ndcg': array([0.04901151])}
EPOCH[831/1000] loss0.043-|Sample:7.69|
EPOCH[832/1000] loss0.043-|Sample:7.70|
EPOCH[833/1000] loss0.043-|Sample:7.75|
EPOCH[834/1000] loss0.043-|Sample:7.70|
EPOCH[835/1000] loss0.043-|Sample:7.78|
EPOCH[836/1000] loss0.043-|Sample:7.61|
EPOCH[837/1000] loss0.043-|Sample:7.64|
EPOCH[838/1000] loss0.043-|Sample:7.59|
EPOCH[839/1000] loss0.043-|Sample:7.80|
EPOCH[840/1000] loss0.043-|Sample:7.70|
[TEST]
{'precision': array([0.02717096]), 'recall': array([0.06067066]), 'ndcg': array([0.04912577])}
EPOCH[841/1000] loss0.043-|Sample:7.65|
EPOCH[842/1000] loss0.044-|Sample:7.55|
EPOCH[843/1000] loss0.043-|Sample:7.61|
EPOCH[844/1000] loss0.043-|Sample:7.65|
EPOCH[845/1000] loss0.043-|Sample:7.58|
EPOCH[846/1000] loss0.044-|Sample:7.75|
EPOCH[847/1000] loss0.043-|Sample:7.59|
EPOCH[848/1000] loss0.043-|Sample:7.69|
EPOCH[849/1000] loss0.043-|Sample:7.76|
EPOCH[850/1000] loss0.043-|Sample:7.65|
[TEST]
{'precision': array([0.02715359]), 'recall': array([0.06055614]), 'ndcg': array([0.04910599])}
EPOCH[851/1000] loss0.043-|Sample:7.80|
EPOCH[852/1000] loss0.043-|Sample:8.09|
EPOCH[853/1000] loss0.043-|Sample:7.70|
EPOCH[854/1000] loss0.043-|Sample:7.56|
EPOCH[855/1000] loss0.044-|Sample:7.70|
EPOCH[856/1000] loss0.043-|Sample:8.31|
EPOCH[857/1000] loss0.044-|Sample:7.90|
EPOCH[858/1000] loss0.043-|Sample:7.55|
EPOCH[859/1000] loss0.043-|Sample:7.64|
EPOCH[860/1000] loss0.043-|Sample:7.88|
[TEST]
{'precision': array([0.02718043]), 'recall': array([0.06067036]), 'ndcg': array([0.04913034])}
EPOCH[861/1000] loss0.043-|Sample:7.58|
EPOCH[862/1000] loss0.044-|Sample:7.69|
EPOCH[863/1000] loss0.044-|Sample:7.97|
EPOCH[864/1000] loss0.043-|Sample:7.53|
EPOCH[865/1000] loss0.044-|Sample:7.70|
EPOCH[866/1000] loss0.043-|Sample:7.58|
EPOCH[867/1000] loss0.043-|Sample:8.36|
EPOCH[868/1000] loss0.043-|Sample:7.65|
EPOCH[869/1000] loss0.043-|Sample:8.17|
EPOCH[870/1000] loss0.043-|Sample:7.87|
[TEST]
{'precision': array([0.02729254]), 'recall': array([0.06093388]), 'ndcg': array([0.04921812])}
EPOCH[871/1000] loss0.043-|Sample:7.58|
EPOCH[872/1000] loss0.043-|Sample:8.15|
EPOCH[873/1000] loss0.043-|Sample:7.82|
EPOCH[874/1000] loss0.043-|Sample:7.69|
EPOCH[875/1000] loss0.043-|Sample:7.62|
EPOCH[876/1000] loss0.043-|Sample:7.78|
EPOCH[877/1000] loss0.043-|Sample:7.73|
EPOCH[878/1000] loss0.043-|Sample:7.55|
EPOCH[879/1000] loss0.043-|Sample:7.61|
EPOCH[880/1000] loss0.043-|Sample:7.80|
[TEST]
{'precision': array([0.0272878]), 'recall': array([0.06103702]), 'ndcg': array([0.04927031])}
EPOCH[881/1000] loss0.043-|Sample:7.73|
EPOCH[882/1000] loss0.044-|Sample:7.55|
EPOCH[883/1000] loss0.043-|Sample:7.61|
EPOCH[884/1000] loss0.043-|Sample:7.70|
EPOCH[885/1000] loss0.043-|Sample:7.61|
EPOCH[886/1000] loss0.044-|Sample:7.62|
EPOCH[887/1000] loss0.043-|Sample:7.72|
EPOCH[888/1000] loss0.043-|Sample:8.26|
EPOCH[889/1000] loss0.043-|Sample:8.00|
EPOCH[890/1000] loss0.043-|Sample:7.72|
[TEST]
{'precision': array([0.02719938]), 'recall': array([0.06068026]), 'ndcg': array([0.0490479])}
EPOCH[891/1000] loss0.043-|Sample:7.73|
EPOCH[892/1000] loss0.043-|Sample:7.62|
EPOCH[893/1000] loss0.043-|Sample:7.59|
EPOCH[894/1000] loss0.043-|Sample:7.55|
EPOCH[895/1000] loss0.043-|Sample:7.00|
EPOCH[896/1000] loss0.043-|Sample:7.67|
EPOCH[897/1000] loss0.043-|Sample:8.44|
EPOCH[898/1000] loss0.043-|Sample:7.78|
EPOCH[899/1000] loss0.043-|Sample:8.15|
EPOCH[900/1000] loss0.043-|Sample:7.94|
[TEST]
{'precision': array([0.02727517]), 'recall': array([0.0607966]), 'ndcg': array([0.0492501])}
EPOCH[901/1000] loss0.043-|Sample:7.62|
EPOCH[902/1000] loss0.043-|Sample:7.89|
EPOCH[903/1000] loss0.043-|Sample:7.83|
EPOCH[904/1000] loss0.043-|Sample:7.78|
EPOCH[905/1000] loss0.043-|Sample:7.31|
EPOCH[906/1000] loss0.043-|Sample:7.59|
EPOCH[907/1000] loss0.043-|Sample:7.84|
EPOCH[908/1000] loss0.043-|Sample:7.59|
EPOCH[909/1000] loss0.043-|Sample:7.80|
EPOCH[910/1000] loss0.043-|Sample:7.61|
[TEST]
{'precision': array([0.02730674]), 'recall': array([0.06098673]), 'ndcg': array([0.04925105])}
EPOCH[911/1000] loss0.043-|Sample:7.40|
EPOCH[912/1000] loss0.043-|Sample:8.59|
EPOCH[913/1000] loss0.043-|Sample:7.86|
EPOCH[914/1000] loss0.043-|Sample:8.17|
EPOCH[915/1000] loss0.043-|Sample:7.59|
EPOCH[916/1000] loss0.043-|Sample:7.59|
EPOCH[917/1000] loss0.043-|Sample:7.65|
EPOCH[918/1000] loss0.043-|Sample:7.72|
EPOCH[919/1000] loss0.043-|Sample:8.45|

drop=0.5
lgcn-v1 ：
D:\ProgramFiles\Anaconda3\envs\image_caption_python36\python.exe D:/workspace/lgcn-yelp/run.py
{'name': 'LGCNDataset', 'path': 'data/yelp2018', 'device': device(type='cuda'), 'val_ratio': 0.1}
init dataset LGCNDataset
{'name': 'LightGCN', 'embedding_size': 64, 'n_layers': 3, 'dropout': 0.5, 'device': device(type='cuda'), 'dataset': <dataset.LGCNDataset object at 0x0000020D832596A0>}
{'name': 'BPRTrainer', 'optimizer': 'Adam', 'lr': 0.001, 'l2_reg': 5e-05, 'n_epochs': 1500, 'batch_size': 2048, 'dataloader_num_workers': 6, 'test_batch_size': 512, 'topks': [20, 100], 'device': device(type='cuda'), 'dataset': <dataset.LGCNDataset object at 0x0000020D832596A0>, 'model': LightGCN(
  (embedding): Embedding(69716, 64)
)}
Epoch 0/1500, Loss: 0.294964, Time: 172.147s
Test result. Precision: 1.558%@20, 1.021%@100, Recall: 3.272%@20, 10.493%@100, NDCG: 2.713%@20, 5.219%@100, Time: 5.885s
Save model to checkpoints\LightGCN_BPRTrainer_LGCNDataset_2.713.pth
Epoch 1/1500, Loss: 0.161826, Time: 173.373s
Test result. Precision: 1.590%@20, 1.039%@100, Recall: 3.357%@20, 10.750%@100, NDCG: 2.776%@20, 5.341%@100, Time: 5.467s
Save model to checkpoints\LightGCN_BPRTrainer_LGCNDataset_2.776.pth
Epoch 2/1500, Loss: 0.154638, Time: 171.360s
Test result. Precision: 1.616%@20, 1.053%@100, Recall: 3.442%@20, 10.946%@100, NDCG: 2.832%@20, 5.434%@100, Time: 5.467s
Save model to checkpoints\LightGCN_BPRTrainer_LGCNDataset_2.832.pth
Epoch 3/1500, Loss: 0.148587, Time: 170.991s
Test result. Precision: 1.655%@20, 1.075%@100, Recall: 3.528%@20, 11.220%@100, NDCG: 2.897%@20, 5.565%@100, Time: 5.546s
Save model to checkpoints\LightGCN_BPRTrainer_LGCNDataset_2.897.pth
Epoch 4/1500, Loss: 0.141282, Time: 171.969s
Test result. Precision: 1.702%@20, 1.100%@100, Recall: 3.642%@20, 11.521%@100, NDCG: 2.984%@20, 5.716%@100, Time: 5.514s
Save model to checkpoints\LightGCN_BPRTrainer_LGCNDataset_2.984.pth
Epoch 5/1500, Loss: 0.135195, Time: 171.585s
Test result. Precision: 1.747%@20, 1.125%@100, Recall: 3.744%@20, 11.801%@100, NDCG: 3.065%@20, 5.856%@100, Time: 5.452s
Save model to checkpoints\LightGCN_BPRTrainer_LGCNDataset_3.065.pth
Epoch 6/1500, Loss: 0.129077, Time: 171.569s
Test result. Precision: 1.795%@20, 1.154%@100, Recall: 3.854%@20, 12.098%@100, NDCG: 3.152%@20, 6.007%@100, Time: 5.421s
Save model to checkpoints\LightGCN_BPRTrainer_LGCNDataset_3.152.pth
Epoch 7/1500, Loss: 0.122726, Time: 171.725s
Test result. Precision: 1.832%@20, 1.174%@100, Recall: 3.937%@20, 12.312%@100, NDCG: 3.206%@20, 6.107%@100, Time: 5.421s
Save model to checkpoints\LightGCN_BPRTrainer_LGCNDataset_3.206.pth
Epoch 8/1500, Loss: 0.118547, Time: 171.741s
Test result. Precision: 1.867%@20, 1.185%@100, Recall: 4.006%@20, 12.431%@100, NDCG: 3.260%@20, 6.178%@100, Time: 5.452s
Save model to checkpoints\LightGCN_BPRTrainer_LGCNDataset_3.260.pth
Epoch 9/1500, Loss: 0.114335, Time: 172.042s
Test result. Precision: 1.892%@20, 1.199%@100, Recall: 4.051%@20, 12.571%@100, NDCG: 3.303%@20, 6.252%@100, Time: 5.436s
Save model to checkpoints\LightGCN_BPRTrainer_LGCNDataset_3.303.pth
Epoch 10/1500, Loss: 0.111480, Time: 172.774s
Test result. Precision: 1.912%@20, 1.207%@100, Recall: 4.086%@20, 12.664%@100, NDCG: 3.339%@20, 6.305%@100, Time: 5.428s
Save model to checkpoints\LightGCN_BPRTrainer_LGCNDataset_3.339.pth
Epoch 11/1500, Loss: 0.109111, Time: 176.693s
Test result. Precision: 1.925%@20, 1.216%@100, Recall: 4.107%@20, 12.768%@100, NDCG: 3.361%@20, 6.353%@100, Time: 5.537s
Save model to checkpoints\LightGCN_BPRTrainer_LGCNDataset_3.361.pth
Epoch 12/1500, Loss: 0.106885, Time: 173.142s
Test result. Precision: 1.937%@20, 1.224%@100, Recall: 4.137%@20, 12.858%@100, NDCG: 3.382%@20, 6.394%@100, Time: 5.402s
Save model to checkpoints\LightGCN_BPRTrainer_LGCNDataset_3.382.pth
Epoch 13/1500, Loss: 0.105107, Time: 177.394s
Test result. Precision: 1.951%@20, 1.233%@100, Recall: 4.169%@20, 12.958%@100, NDCG: 3.406%@20, 6.442%@100, Time: 5.699s
Save model to checkpoints\LightGCN_BPRTrainer_LGCNDataset_3.406.pth
Epoch 14/1500, Loss: 0.103133, Time: 173.748s
Test result. Precision: 1.959%@20, 1.243%@100, Recall: 4.187%@20, 13.051%@100, NDCG: 3.422%@20, 6.487%@100, Time: 5.671s
Save model to checkpoints\LightGCN_BPRTrainer_LGCNDataset_3.422.pth
Epoch 15/1500, Loss: 0.101090, Time: 171.688s
Test result. Precision: 1.969%@20, 1.252%@100, Recall: 4.211%@20, 13.147%@100, NDCG: 3.440%@20, 6.530%@100, Time: 5.530s
Save model to checkpoints\LightGCN_BPRTrainer_LGCNDataset_3.440.pth
Epoch 16/1500, Loss: 0.099396, Time: 170.654s
Test result. Precision: 1.983%@20, 1.261%@100, Recall: 4.244%@20, 13.248%@100, NDCG: 3.467%@20, 6.582%@100, Time: 5.561s
Save model to checkpoints\LightGCN_BPRTrainer_LGCNDataset_3.467.pth
Epoch 17/1500, Loss: 0.096586, Time: 170.861s
Test result. Precision: 1.998%@20, 1.271%@100, Recall: 4.273%@20, 13.364%@100, NDCG: 3.493%@20, 6.636%@100, Time: 5.467s
Save model to checkpoints\LightGCN_BPRTrainer_LGCNDataset_3.493.pth
Epoch 18/1500, Loss: 0.095669, Time: 170.679s
Test result. Precision: 2.008%@20, 1.283%@100, Recall: 4.305%@20, 13.507%@100, NDCG: 3.522%@20, 6.706%@100, Time: 5.405s
Save model to checkpoints\LightGCN_BPRTrainer_LGCNDataset_3.522.pth
Epoch 19/1500, Loss: 0.093903, Time: 171.048s
Test result. Precision: 2.019%@20, 1.294%@100, Recall: 4.327%@20, 13.622%@100, NDCG: 3.548%@20, 6.765%@100, Time: 5.503s
Save model to checkpoints\LightGCN_BPRTrainer_LGCNDataset_3.548.pth
Epoch 20/1500, Loss: 0.092962, Time: 172.439s
Test result. Precision: 2.040%@20, 1.306%@100, Recall: 4.374%@20, 13.773%@100, NDCG: 3.585%@20, 6.834%@100, Time: 5.696s
Save model to checkpoints\LightGCN_BPRTrainer_LGCNDataset_3.585.pth
Epoch 21/1500, Loss: 0.090575, Time: 172.246s
Test result. Precision: 2.057%@20, 1.319%@100, Recall: 4.412%@20, 13.924%@100, NDCG: 3.624%@20, 6.911%@100, Time: 5.452s
Save model to checkpoints\LightGCN_BPRTrainer_LGCNDataset_3.624.pth
Epoch 22/1500, Loss: 0.089091, Time: 174.319s
Test result. Precision: 2.073%@20, 1.327%@100, Recall: 4.463%@20, 14.007%@100, NDCG: 3.654%@20, 6.954%@100, Time: 5.405s
Save model to checkpoints\LightGCN_BPRTrainer_LGCNDataset_3.654.pth
Epoch 23/1500, Loss: 0.087294, Time: 170.116s
Test result. Precision: 2.081%@20, 1.336%@100, Recall: 4.476%@20, 14.122%@100, NDCG: 3.675%@20, 7.009%@100, Time: 5.499s
Save model to checkpoints\LightGCN_BPRTrainer_LGCNDataset_3.675.pth
Epoch 24/1500, Loss: 0.086569, Time: 170.319s
Test result. Precision: 2.097%@20, 1.347%@100, Recall: 4.516%@20, 14.248%@100, NDCG: 3.698%@20, 7.061%@100, Time: 5.421s
Save model to checkpoints\LightGCN_BPRTrainer_LGCNDataset_3.698.pth
Epoch 25/1500, Loss: 0.085054, Time: 170.364s
Test result. Precision: 2.102%@20, 1.354%@100, Recall: 4.525%@20, 14.336%@100, NDCG: 3.711%@20, 7.102%@100, Time: 5.530s
Save model to checkpoints\LightGCN_BPRTrainer_LGCNDataset_3.711.pth
Epoch 26/1500, Loss: 0.083562, Time: 170.466s
Test result. Precision: 2.113%@20, 1.360%@100, Recall: 4.556%@20, 14.417%@100, NDCG: 3.733%@20, 7.141%@100, Time: 5.436s
Save model to checkpoints\LightGCN_BPRTrainer_LGCNDataset_3.733.pth
Epoch 27/1500, Loss: 0.082125, Time: 170.222s
Test result. Precision: 2.124%@20, 1.370%@100, Recall: 4.575%@20, 14.516%@100, NDCG: 3.758%@20, 7.194%@100, Time: 5.421s
Save model to checkpoints\LightGCN_BPRTrainer_LGCNDataset_3.758.pth
Epoch 28/1500, Loss: 0.081567, Time: 170.698s
Test result. Precision: 2.128%@20, 1.379%@100, Recall: 4.589%@20, 14.628%@100, NDCG: 3.776%@20, 7.247%@100, Time: 5.592s
Save model to checkpoints\LightGCN_BPRTrainer_LGCNDataset_3.776.pth
Epoch 29/1500, Loss: 0.080098, Time: 171.749s
Test result. Precision: 2.126%@20, 1.384%@100, Recall: 4.588%@20, 14.686%@100, NDCG: 3.778%@20, 7.271%@100, Time: 5.608s
Save model to checkpoints\LightGCN_BPRTrainer_LGCNDataset_3.778.pth
Epoch 30/1500, Loss: 0.079479, Time: 170.630s
Test result. Precision: 2.142%@20, 1.388%@100, Recall: 4.628%@20, 14.774%@100, NDCG: 3.801%@20, 7.306%@100, Time: 5.421s
Save model to checkpoints\LightGCN_BPRTrainer_LGCNDataset_3.801.pth
Epoch 31/1500, Loss: 0.077811, Time: 170.487s
Test result. Precision: 2.149%@20, 1.392%@100, Recall: 4.650%@20, 14.839%@100, NDCG: 3.812%@20, 7.331%@100, Time: 5.483s
Save model to checkpoints\LightGCN_BPRTrainer_LGCNDataset_3.812.pth
Epoch 32/1500, Loss: 0.077161, Time: 170.647s
Test result. Precision: 2.158%@20, 1.397%@100, Recall: 4.666%@20, 14.916%@100, NDCG: 3.822%@20, 7.359%@100, Time: 5.421s
Save model to checkpoints\LightGCN_BPRTrainer_LGCNDataset_3.822.pth
Epoch 33/1500, Loss: 0.076809, Time: 170.408s
Test result. Precision: 2.173%@20, 1.403%@100, Recall: 4.699%@20, 14.990%@100, NDCG: 3.848%@20, 7.398%@100, Time: 5.421s
Save model to checkpoints\LightGCN_BPRTrainer_LGCNDataset_3.848.pth
Epoch 34/1500, Loss: 0.074934, Time: 170.569s
Test result. Precision: 2.182%@20, 1.409%@100, Recall: 4.721%@20, 15.050%@100, NDCG: 3.870%@20, 7.436%@100, Time: 5.608s
Save model to checkpoints\LightGCN_BPRTrainer_LGCNDataset_3.870.pth
Epoch 35/1500, Loss: 0.074393, Time: 171.121s
Test result. Precision: 2.193%@20, 1.414%@100, Recall: 4.755%@20, 15.131%@100, NDCG: 3.892%@20, 7.471%@100, Time: 5.421s
Save model to checkpoints\LightGCN_BPRTrainer_LGCNDataset_3.892.pth
Epoch 36/1500, Loss: 0.073670, Time: 170.933s
Test result. Precision: 2.199%@20, 1.420%@100, Recall: 4.769%@20, 15.193%@100, NDCG: 3.897%@20, 7.495%@100, Time: 5.358s
Save model to checkpoints\LightGCN_BPRTrainer_LGCNDataset_3.897.pth
Epoch 37/1500, Loss: 0.073160, Time: 172.274s
Test result. Precision: 2.205%@20, 1.422%@100, Recall: 4.795%@20, 15.234%@100, NDCG: 3.914%@20, 7.518%@100, Time: 5.521s
Save model to checkpoints\LightGCN_BPRTrainer_LGCNDataset_3.914.pth
Epoch 38/1500, Loss: 0.072120, Time: 171.400s
Test result. Precision: 2.214%@20, 1.429%@100, Recall: 4.813%@20, 15.320%@100, NDCG: 3.932%@20, 7.560%@100, Time: 5.499s
Save model to checkpoints\LightGCN_BPRTrainer_LGCNDataset_3.932.pth
Epoch 39/1500, Loss: 0.071657, Time: 170.340s
Test result. Precision: 2.225%@20, 1.434%@100, Recall: 4.849%@20, 15.379%@100, NDCG: 3.956%@20, 7.592%@100, Time: 5.530s
Save model to checkpoints\LightGCN_BPRTrainer_LGCNDataset_3.956.pth
Epoch 40/1500, Loss: 0.070600, Time: 170.480s
Test result. Precision: 2.229%@20, 1.438%@100, Recall: 4.860%@20, 15.427%@100, NDCG: 3.963%@20, 7.613%@100, Time: 5.374s
Save model to checkpoints\LightGCN_BPRTrainer_LGCNDataset_3.963.pth
Epoch 41/1500, Loss: 0.070326, Time: 170.886s
Test result. Precision: 2.239%@20, 1.447%@100, Recall: 4.889%@20, 15.536%@100, NDCG: 3.982%@20, 7.659%@100, Time: 5.437s
Save model to checkpoints\LightGCN_BPRTrainer_LGCNDataset_3.982.pth
Epoch 42/1500, Loss: 0.069536, Time: 171.019s
Test result. Precision: 2.240%@20, 1.449%@100, Recall: 4.887%@20, 15.569%@100, NDCG: 3.984%@20, 7.674%@100, Time: 5.436s
Save model to checkpoints\LightGCN_BPRTrainer_LGCNDataset_3.984.pth
Epoch 43/1500, Loss: 0.068759, Time: 170.171s
Test result. Precision: 2.248%@20, 1.457%@100, Recall: 4.910%@20, 15.656%@100, NDCG: 4.001%@20, 7.713%@100, Time: 5.389s
Save model to checkpoints\LightGCN_BPRTrainer_LGCNDataset_4.001.pth
Epoch 44/1500, Loss: 0.068267, Time: 171.336s
Test result. Precision: 2.254%@20, 1.461%@100, Recall: 4.936%@20, 15.720%@100, NDCG: 4.014%@20, 7.740%@100, Time: 5.561s
Save model to checkpoints\LightGCN_BPRTrainer_LGCNDataset_4.014.pth
Epoch 45/1500, Loss: 0.067333, Time: 171.415s
Test result. Precision: 2.259%@20, 1.466%@100, Recall: 4.947%@20, 15.774%@100, NDCG: 4.028%@20, 7.771%@100, Time: 5.374s
Save model to checkpoints\LightGCN_BPRTrainer_LGCNDataset_4.028.pth
Epoch 46/1500, Loss: 0.067233, Time: 176.998s
Test result. Precision: 2.266%@20, 1.469%@100, Recall: 4.970%@20, 15.831%@100, NDCG: 4.044%@20, 7.797%@100, Time: 5.467s
Save model to checkpoints\LightGCN_BPRTrainer_LGCNDataset_4.044.pth
Epoch 47/1500, Loss: 0.066643, Time: 170.759s
Test result. Precision: 2.274%@20, 1.474%@100, Recall: 5.001%@20, 15.884%@100, NDCG: 4.058%@20, 7.821%@100, Time: 5.405s
Save model to checkpoints\LightGCN_BPRTrainer_LGCNDataset_4.058.pth
Epoch 48/1500, Loss: 0.065387, Time: 170.298s
Test result. Precision: 2.281%@20, 1.480%@100, Recall: 5.016%@20, 15.967%@100, NDCG: 4.067%@20, 7.851%@100, Time: 5.342s
Save model to checkpoints\LightGCN_BPRTrainer_LGCNDataset_4.067.pth
Epoch 49/1500, Loss: 0.065718, Time: 170.505s
Test result. Precision: 2.281%@20, 1.482%@100, Recall: 5.024%@20, 15.989%@100, NDCG: 4.073%@20, 7.865%@100, Time: 5.546s
Save model to checkpoints\LightGCN_BPRTrainer_LGCNDataset_4.073.pth
Epoch 50/1500, Loss: 0.064556, Time: 170.177s
Test result. Precision: 2.293%@20, 1.488%@100, Recall: 5.042%@20, 16.049%@100, NDCG: 4.086%@20, 7.893%@100, Time: 5.389s
Save model to checkpoints\LightGCN_BPRTrainer_LGCNDataset_4.086.pth
Epoch 51/1500, Loss: 0.064675, Time: 170.847s
Test result. Precision: 2.300%@20, 1.492%@100, Recall: 5.057%@20, 16.106%@100, NDCG: 4.107%@20, 7.929%@100, Time: 5.374s
Save model to checkpoints\LightGCN_BPRTrainer_LGCNDataset_4.107.pth
Epoch 52/1500, Loss: 0.063922, Time: 170.748s
Test result. Precision: 2.297%@20, 1.498%@100, Recall: 5.048%@20, 16.164%@100, NDCG: 4.108%@20, 7.955%@100, Time: 5.452s
Save model to checkpoints\LightGCN_BPRTrainer_LGCNDataset_4.108.pth
Epoch 53/1500, Loss: 0.063315, Time: 170.373s
Test result. Precision: 2.305%@20, 1.498%@100, Recall: 5.068%@20, 16.195%@100, NDCG: 4.125%@20, 7.972%@100, Time: 5.493s
Save model to checkpoints\LightGCN_BPRTrainer_LGCNDataset_4.125.pth
Epoch 54/1500, Loss: 0.062581, Time: 170.195s
Test result. Precision: 2.315%@20, 1.502%@100, Recall: 5.092%@20, 16.235%@100, NDCG: 4.139%@20, 7.992%@100, Time: 5.438s
Save model to checkpoints\LightGCN_BPRTrainer_LGCNDataset_4.139.pth
Epoch 55/1500, Loss: 0.062582, Time: 170.051s
Test result. Precision: 2.328%@20, 1.507%@100, Recall: 5.120%@20, 16.303%@100, NDCG: 4.159%@20, 8.024%@100, Time: 5.389s
Save model to checkpoints\LightGCN_BPRTrainer_LGCNDataset_4.159.pth
Epoch 56/1500, Loss: 0.061774, Time: 170.168s
Test result. Precision: 2.328%@20, 1.512%@100, Recall: 5.123%@20, 16.357%@100, NDCG: 4.164%@20, 8.047%@100, Time: 5.421s
Save model to checkpoints\LightGCN_BPRTrainer_LGCNDataset_4.164.pth
Epoch 57/1500, Loss: 0.061028, Time: 170.097s
Test result. Precision: 2.334%@20, 1.514%@100, Recall: 5.141%@20, 16.392%@100, NDCG: 4.177%@20, 8.066%@100, Time: 5.436s
Save model to checkpoints\LightGCN_BPRTrainer_LGCNDataset_4.177.pth
Epoch 58/1500, Loss: 0.060748, Time: 170.395s
Test result. Precision: 2.339%@20, 1.517%@100, Recall: 5.149%@20, 16.431%@100, NDCG: 4.183%@20, 8.084%@100, Time: 5.436s
Save model to checkpoints\LightGCN_BPRTrainer_LGCNDataset_4.183.pth
Epoch 59/1500, Loss: 0.060827, Time: 170.162s
Test result. Precision: 2.345%@20, 1.521%@100, Recall: 5.161%@20, 16.472%@100, NDCG: 4.195%@20, 8.106%@100, Time: 5.436s
Save model to checkpoints\LightGCN_BPRTrainer_LGCNDataset_4.195.pth
Epoch 60/1500, Loss: 0.059959, Time: 170.550s
Test result. Precision: 2.353%@20, 1.525%@100, Recall: 5.180%@20, 16.522%@100, NDCG: 4.211%@20, 8.132%@100, Time: 5.520s
Save model to checkpoints\LightGCN_BPRTrainer_LGCNDataset_4.211.pth
Epoch 61/1500, Loss: 0.059756, Time: 170.301s
Test result. Precision: 2.364%@20, 1.529%@100, Recall: 5.202%@20, 16.576%@100, NDCG: 4.223%@20, 8.153%@100, Time: 5.498s
Save model to checkpoints\LightGCN_BPRTrainer_LGCNDataset_4.223.pth
Epoch 62/1500, Loss: 0.058807, Time: 170.094s
Test result. Precision: 2.371%@20, 1.535%@100, Recall: 5.219%@20, 16.634%@100, NDCG: 4.235%@20, 8.181%@100, Time: 5.327s
Save model to checkpoints\LightGCN_BPRTrainer_LGCNDataset_4.235.pth
Epoch 63/1500, Loss: 0.058421, Time: 170.478s
Test result. Precision: 2.374%@20, 1.537%@100, Recall: 5.229%@20, 16.654%@100, NDCG: 4.244%@20, 8.196%@100, Time: 5.671s
Save model to checkpoints\LightGCN_BPRTrainer_LGCNDataset_4.244.pth
Epoch 64/1500, Loss: 0.058521, Time: 170.275s
Test result. Precision: 2.383%@20, 1.543%@100, Recall: 5.246%@20, 16.728%@100, NDCG: 4.262%@20, 8.230%@100, Time: 5.421s
Save model to checkpoints\LightGCN_BPRTrainer_LGCNDataset_4.262.pth
Epoch 65/1500, Loss: 0.058300, Time: 170.070s
Test result. Precision: 2.388%@20, 1.544%@100, Recall: 5.261%@20, 16.752%@100, NDCG: 4.272%@20, 8.245%@100, Time: 5.358s
Save model to checkpoints\LightGCN_BPRTrainer_LGCNDataset_4.272.pth
Epoch 66/1500, Loss: 0.057547, Time: 170.452s
Test result. Precision: 2.390%@20, 1.548%@100, Recall: 5.272%@20, 16.801%@100, NDCG: 4.284%@20, 8.271%@100, Time: 5.374s
Save model to checkpoints\LightGCN_BPRTrainer_LGCNDataset_4.284.pth
Epoch 67/1500, Loss: 0.057605, Time: 170.316s
Test result. Precision: 2.398%@20, 1.551%@100, Recall: 5.279%@20, 16.842%@100, NDCG: 4.297%@20, 8.294%@100, Time: 5.421s
Save model to checkpoints\LightGCN_BPRTrainer_LGCNDataset_4.297.pth
Epoch 68/1500, Loss: 0.056884, Time: 170.068s
Test result. Precision: 2.400%@20, 1.553%@100, Recall: 5.286%@20, 16.862%@100, NDCG: 4.304%@20, 8.307%@100, Time: 5.455s
Save model to checkpoints\LightGCN_BPRTrainer_LGCNDataset_4.304.pth
Epoch 69/1500, Loss: 0.056819, Time: 169.991s
Test result. Precision: 2.399%@20, 1.557%@100, Recall: 5.286%@20, 16.903%@100, NDCG: 4.307%@20, 8.326%@100, Time: 5.389s
Save model to checkpoints\LightGCN_BPRTrainer_LGCNDataset_4.307.pth
Epoch 70/1500, Loss: 0.056501, Time: 170.357s
Test result. Precision: 2.406%@20, 1.558%@100, Recall: 5.300%@20, 16.933%@100, NDCG: 4.323%@20, 8.349%@100, Time: 5.577s
Save model to checkpoints\LightGCN_BPRTrainer_LGCNDataset_4.323.pth
Epoch 71/1500, Loss: 0.056182, Time: 170.268s
Test result. Precision: 2.419%@20, 1.564%@100, Recall: 5.332%@20, 16.991%@100, NDCG: 4.342%@20, 8.375%@100, Time: 5.421s
Save model to checkpoints\LightGCN_BPRTrainer_LGCNDataset_4.342.pth
Epoch 72/1500, Loss: 0.055612, Time: 170.381s
Test result. Precision: 2.417%@20, 1.564%@100, Recall: 5.326%@20, 16.990%@100, NDCG: 4.341%@20, 8.377%@100, Time: 5.483s
Save model to checkpoints\LightGCN_BPRTrainer_LGCNDataset_4.341.pth
Epoch 73/1500, Loss: 0.055205, Time: 170.515s
Test result. Precision: 2.424%@20, 1.567%@100, Recall: 5.352%@20, 17.028%@100, NDCG: 4.347%@20, 8.388%@100, Time: 5.546s
Save model to checkpoints\LightGCN_BPRTrainer_LGCNDataset_4.347.pth
Epoch 74/1500, Loss: 0.055300, Time: 170.189s
Test result. Precision: 2.441%@20, 1.570%@100, Recall: 5.392%@20, 17.059%@100, NDCG: 4.375%@20, 8.412%@100, Time: 5.491s
Save model to checkpoints\LightGCN_BPRTrainer_LGCNDataset_4.375.pth
Epoch 75/1500, Loss: 0.054907, Time: 169.849s
Test result. Precision: 2.447%@20, 1.572%@100, Recall: 5.404%@20, 17.091%@100, NDCG: 4.387%@20, 8.430%@100, Time: 5.429s
Save model to checkpoints\LightGCN_BPRTrainer_LGCNDataset_4.387.pth
Epoch 76/1500, Loss: 0.054325, Time: 169.929s
Test result. Precision: 2.441%@20, 1.572%@100, Recall: 5.383%@20, 17.100%@100, NDCG: 4.379%@20, 8.433%@100, Time: 5.374s
Save model to checkpoints\LightGCN_BPRTrainer_LGCNDataset_4.379.pth
Epoch 77/1500, Loss: 0.054257, Time: 170.156s
Test result. Precision: 2.444%@20, 1.575%@100, Recall: 5.398%@20, 17.132%@100, NDCG: 4.389%@20, 8.451%@100, Time: 5.514s
Save model to checkpoints\LightGCN_BPRTrainer_LGCNDataset_4.389.pth
Epoch 78/1500, Loss: 0.054016, Time: 170.446s
Test result. Precision: 2.456%@20, 1.575%@100, Recall: 5.424%@20, 17.123%@100, NDCG: 4.411%@20, 8.461%@100, Time: 5.421s
Save model to checkpoints\LightGCN_BPRTrainer_LGCNDataset_4.411.pth
Epoch 79/1500, Loss: 0.053658, Time: 170.146s
Test result. Precision: 2.468%@20, 1.580%@100, Recall: 5.450%@20, 17.179%@100, NDCG: 4.434%@20, 8.492%@100, Time: 5.405s
Save model to checkpoints\LightGCN_BPRTrainer_LGCNDataset_4.434.pth
Epoch 80/1500, Loss: 0.053585, Time: 169.990s
Test result. Precision: 2.469%@20, 1.583%@100, Recall: 5.449%@20, 17.224%@100, NDCG: 4.429%@20, 8.501%@100, Time: 5.389s
Save model to checkpoints\LightGCN_BPRTrainer_LGCNDataset_4.429.pth
Epoch 81/1500, Loss: 0.052916, Time: 170.082s
Test result. Precision: 2.472%@20, 1.588%@100, Recall: 5.455%@20, 17.267%@100, NDCG: 4.443%@20, 8.529%@100, Time: 5.566s
Save model to checkpoints\LightGCN_BPRTrainer_LGCNDataset_4.443.pth
Epoch 82/1500, Loss: 0.052570, Time: 170.625s
Test result. Precision: 2.481%@20, 1.586%@100, Recall: 5.476%@20, 17.248%@100, NDCG: 4.458%@20, 8.532%@100, Time: 5.494s
Save model to checkpoints\LightGCN_BPRTrainer_LGCNDataset_4.458.pth
Epoch 83/1500, Loss: 0.052300, Time: 169.912s
Test result. Precision: 2.482%@20, 1.589%@100, Recall: 5.491%@20, 17.281%@100, NDCG: 4.460%@20, 8.540%@100, Time: 5.342s
Save model to checkpoints\LightGCN_BPRTrainer_LGCNDataset_4.460.pth
Epoch 84/1500, Loss: 0.052240, Time: 170.307s
Test result. Precision: 2.482%@20, 1.589%@100, Recall: 5.492%@20, 17.290%@100, NDCG: 4.465%@20, 8.547%@100, Time: 5.499s
Save model to checkpoints\LightGCN_BPRTrainer_LGCNDataset_4.465.pth
Epoch 85/1500, Loss: 0.052016, Time: 170.090s
Test result. Precision: 2.492%@20, 1.596%@100, Recall: 5.516%@20, 17.371%@100, NDCG: 4.484%@20, 8.584%@100, Time: 5.327s
Save model to checkpoints\LightGCN_BPRTrainer_LGCNDataset_4.484.pth
Epoch 86/1500, Loss: 0.051588, Time: 170.169s
Test result. Precision: 2.493%@20, 1.597%@100, Recall: 5.525%@20, 17.369%@100, NDCG: 4.492%@20, 8.590%@100, Time: 5.452s
Save model to checkpoints\LightGCN_BPRTrainer_LGCNDataset_4.492.pth
Epoch 87/1500, Loss: 0.051678, Time: 170.347s
Test result. Precision: 2.504%@20, 1.597%@100, Recall: 5.535%@20, 17.384%@100, NDCG: 4.505%@20, 8.601%@100, Time: 5.409s
Save model to checkpoints\LightGCN_BPRTrainer_LGCNDataset_4.505.pth
Epoch 88/1500, Loss: 0.051425, Time: 170.206s
Test result. Precision: 2.503%@20, 1.599%@100, Recall: 5.530%@20, 17.398%@100, NDCG: 4.508%@20, 8.614%@100, Time: 5.532s
Save model to checkpoints\LightGCN_BPRTrainer_LGCNDataset_4.508.pth
Epoch 89/1500, Loss: 0.051105, Time: 169.898s
Test result. Precision: 2.511%@20, 1.602%@100, Recall: 5.552%@20, 17.435%@100, NDCG: 4.516%@20, 8.625%@100, Time: 5.425s
Save model to checkpoints\LightGCN_BPRTrainer_LGCNDataset_4.516.pth
Epoch 90/1500, Loss: 0.050795, Time: 170.175s
Test result. Precision: 2.512%@20, 1.603%@100, Recall: 5.564%@20, 17.437%@100, NDCG: 4.521%@20, 8.630%@100, Time: 5.374s
Save model to checkpoints\LightGCN_BPRTrainer_LGCNDataset_4.521.pth
Epoch 91/1500, Loss: 0.050181, Time: 170.267s
Test result. Precision: 2.519%@20, 1.605%@100, Recall: 5.579%@20, 17.467%@100, NDCG: 4.536%@20, 8.648%@100, Time: 5.358s
Save model to checkpoints\LightGCN_BPRTrainer_LGCNDataset_4.536.pth
Epoch 92/1500, Loss: 0.050480, Time: 170.175s
Test result. Precision: 2.521%@20, 1.608%@100, Recall: 5.582%@20, 17.493%@100, NDCG: 4.534%@20, 8.656%@100, Time: 5.358s
Save model to checkpoints\LightGCN_BPRTrainer_LGCNDataset_4.534.pth
Epoch 93/1500, Loss: 0.050139, Time: 170.662s
Test result. Precision: 2.524%@20, 1.610%@100, Recall: 5.585%@20, 17.520%@100, NDCG: 4.538%@20, 8.667%@100, Time: 5.514s
Save model to checkpoints\LightGCN_BPRTrainer_LGCNDataset_4.538.pth
Epoch 94/1500, Loss: 0.049717, Time: 170.459s
Test result. Precision: 2.521%@20, 1.611%@100, Recall: 5.584%@20, 17.538%@100, NDCG: 4.544%@20, 8.680%@100, Time: 5.521s
Save model to checkpoints\LightGCN_BPRTrainer_LGCNDataset_4.544.pth
Epoch 95/1500, Loss: 0.049881, Time: 169.922s
Test result. Precision: 2.523%@20, 1.612%@100, Recall: 5.585%@20, 17.552%@100, NDCG: 4.547%@20, 8.688%@100, Time: 5.482s
Save model to checkpoints\LightGCN_BPRTrainer_LGCNDataset_4.547.pth
Epoch 96/1500, Loss: 0.049403, Time: 169.740s
Test result. Precision: 2.522%@20, 1.613%@100, Recall: 5.587%@20, 17.561%@100, NDCG: 4.549%@20, 8.694%@100, Time: 5.327s
Save model to checkpoints\LightGCN_BPRTrainer_LGCNDataset_4.549.pth
Epoch 97/1500, Loss: 0.049053, Time: 170.383s
Test result. Precision: 2.527%@20, 1.614%@100, Recall: 5.593%@20, 17.577%@100, NDCG: 4.558%@20, 8.706%@100, Time: 5.499s
Save model to checkpoints\LightGCN_BPRTrainer_LGCNDataset_4.558.pth
Epoch 98/1500, Loss: 0.048660, Time: 169.933s
Test result. Precision: 2.535%@20, 1.616%@100, Recall: 5.614%@20, 17.598%@100, NDCG: 4.570%@20, 8.719%@100, Time: 5.374s
Save model to checkpoints\LightGCN_BPRTrainer_LGCNDataset_4.570.pth
Epoch 99/1500, Loss: 0.048900, Time: 170.292s
Test result. Precision: 2.532%@20, 1.620%@100, Recall: 5.609%@20, 17.666%@100, NDCG: 4.567%@20, 8.740%@100, Time: 5.436s
Save model to checkpoints\LightGCN_BPRTrainer_LGCNDataset_4.567.pth
Epoch 100/1500, Loss: 0.048154, Time: 170.136s
Test result. Precision: 2.540%@20, 1.620%@100, Recall: 5.628%@20, 17.651%@100, NDCG: 4.581%@20, 8.742%@100, Time: 5.421s
Save model to checkpoints\LightGCN_BPRTrainer_LGCNDataset_4.581.pth
Epoch 101/1500, Loss: 0.047838, Time: 170.343s
Test result. Precision: 2.551%@20, 1.620%@100, Recall: 5.649%@20, 17.658%@100, NDCG: 4.598%@20, 8.753%@100, Time: 5.342s
Save model to checkpoints\LightGCN_BPRTrainer_LGCNDataset_4.598.pth
Epoch 102/1500, Loss: 0.048308, Time: 170.222s
Test result. Precision: 2.557%@20, 1.622%@100, Recall: 5.666%@20, 17.676%@100, NDCG: 4.606%@20, 8.762%@100, Time: 5.411s
Save model to checkpoints\LightGCN_BPRTrainer_LGCNDataset_4.606.pth
Epoch 103/1500, Loss: 0.047732, Time: 170.189s
Test result. Precision: 2.555%@20, 1.624%@100, Recall: 5.661%@20, 17.697%@100, NDCG: 4.602%@20, 8.767%@100, Time: 5.358s
Save model to checkpoints\LightGCN_BPRTrainer_LGCNDataset_4.602.pth
Epoch 104/1500, Loss: 0.047644, Time: 170.294s
Test result. Precision: 2.552%@20, 1.626%@100, Recall: 5.660%@20, 17.725%@100, NDCG: 4.606%@20, 8.783%@100, Time: 5.405s
Save model to checkpoints\LightGCN_BPRTrainer_LGCNDataset_4.606.pth
Epoch 105/1500, Loss: 0.047099, Time: 169.917s
Test result. Precision: 2.564%@20, 1.629%@100, Recall: 5.692%@20, 17.753%@100, NDCG: 4.625%@20, 8.800%@100, Time: 5.374s
Save model to checkpoints\LightGCN_BPRTrainer_LGCNDataset_4.625.pth
Epoch 106/1500, Loss: 0.046997, Time: 169.961s
Test result. Precision: 2.562%@20, 1.631%@100, Recall: 5.687%@20, 17.772%@100, NDCG: 4.626%@20, 8.809%@100, Time: 5.389s
Save model to checkpoints\LightGCN_BPRTrainer_LGCNDataset_4.626.pth
Epoch 107/1500, Loss: 0.047072, Time: 170.089s
Test result. Precision: 2.576%@20, 1.636%@100, Recall: 5.719%@20, 17.826%@100, NDCG: 4.647%@20, 8.836%@100, Time: 5.342s
Save model to checkpoints\LightGCN_BPRTrainer_LGCNDataset_4.647.pth
Epoch 108/1500, Loss: 0.046835, Time: 170.434s
Test result. Precision: 2.583%@20, 1.638%@100, Recall: 5.731%@20, 17.840%@100, NDCG: 4.658%@20, 8.848%@100, Time: 5.468s
Save model to checkpoints\LightGCN_BPRTrainer_LGCNDataset_4.658.pth
Epoch 109/1500, Loss: 0.047115, Time: 170.213s
Test result. Precision: 2.583%@20, 1.641%@100, Recall: 5.731%@20, 17.873%@100, NDCG: 4.664%@20, 8.867%@100, Time: 5.638s
Save model to checkpoints\LightGCN_BPRTrainer_LGCNDataset_4.664.pth
Epoch 110/1500, Loss: 0.046773, Time: 169.758s
Test result. Precision: 2.590%@20, 1.640%@100, Recall: 5.752%@20, 17.870%@100, NDCG: 4.675%@20, 8.869%@100, Time: 5.389s
Save model to checkpoints\LightGCN_BPRTrainer_LGCNDataset_4.675.pth
Epoch 111/1500, Loss: 0.046474, Time: 169.982s
Test result. Precision: 2.593%@20, 1.642%@100, Recall: 5.755%@20, 17.905%@100, NDCG: 4.678%@20, 8.880%@100, Time: 5.405s
Save model to checkpoints\LightGCN_BPRTrainer_LGCNDataset_4.678.pth
Epoch 112/1500, Loss: 0.046249, Time: 170.392s
Test result. Precision: 2.599%@20, 1.644%@100, Recall: 5.770%@20, 17.908%@100, NDCG: 4.689%@20, 8.888%@100, Time: 5.358s
Save model to checkpoints\LightGCN_BPRTrainer_LGCNDataset_4.689.pth
Epoch 113/1500, Loss: 0.046339, Time: 170.320s
Test result. Precision: 2.593%@20, 1.644%@100, Recall: 5.757%@20, 17.914%@100, NDCG: 4.683%@20, 8.891%@100, Time: 5.421s
Save model to checkpoints\LightGCN_BPRTrainer_LGCNDataset_4.683.pth
Epoch 114/1500, Loss: 0.045790, Time: 170.096s
Test result. Precision: 2.599%@20, 1.646%@100, Recall: 5.766%@20, 17.930%@100, NDCG: 4.689%@20, 8.898%@100, Time: 5.374s
Save model to checkpoints\LightGCN_BPRTrainer_LGCNDataset_4.689.pth
Epoch 115/1500, Loss: 0.045601, Time: 169.940s
Test result. Precision: 2.602%@20, 1.646%@100, Recall: 5.773%@20, 17.928%@100, NDCG: 4.693%@20, 8.899%@100, Time: 5.508s
Save model to checkpoints\LightGCN_BPRTrainer_LGCNDataset_4.693.pth
Epoch 116/1500, Loss: 0.045634, Time: 170.021s
Test result. Precision: 2.599%@20, 1.649%@100, Recall: 5.775%@20, 17.959%@100, NDCG: 4.698%@20, 8.915%@100, Time: 5.453s
Save model to checkpoints\LightGCN_BPRTrainer_LGCNDataset_4.698.pth
Epoch 117/1500, Loss: 0.045365, Time: 170.193s
Test result. Precision: 2.602%@20, 1.651%@100, Recall: 5.778%@20, 17.992%@100, NDCG: 4.706%@20, 8.934%@100, Time: 5.374s
Save model to checkpoints\LightGCN_BPRTrainer_LGCNDataset_4.706.pth
Epoch 118/1500, Loss: 0.045059, Time: 170.154s
Test result. Precision: 2.602%@20, 1.650%@100, Recall: 5.784%@20, 17.980%@100, NDCG: 4.701%@20, 8.923%@100, Time: 5.421s
Save model to checkpoints\LightGCN_BPRTrainer_LGCNDataset_4.701.pth
Epoch 119/1500, Loss: 0.044948, Time: 170.134s
Test result. Precision: 2.613%@20, 1.652%@100, Recall: 5.809%@20, 17.999%@100, NDCG: 4.717%@20, 8.938%@100, Time: 5.405s
Save model to checkpoints\LightGCN_BPRTrainer_LGCNDataset_4.717.pth
Epoch 120/1500, Loss: 0.044488, Time: 170.145s
Test result. Precision: 2.607%@20, 1.653%@100, Recall: 5.791%@20, 18.018%@100, NDCG: 4.710%@20, 8.943%@100, Time: 5.405s
Save model to checkpoints\LightGCN_BPRTrainer_LGCNDataset_4.710.pth
Epoch 121/1500, Loss: 0.044512, Time: 169.954s
Test result. Precision: 2.614%@20, 1.651%@100, Recall: 5.802%@20, 17.993%@100, NDCG: 4.720%@20, 8.940%@100, Time: 5.459s
Save model to checkpoints\LightGCN_BPRTrainer_LGCNDataset_4.720.pth
Epoch 122/1500, Loss: 0.044810, Time: 170.733s
Test result. Precision: 2.616%@20, 1.653%@100, Recall: 5.811%@20, 18.026%@100, NDCG: 4.725%@20, 8.953%@100, Time: 5.514s
Save model to checkpoints\LightGCN_BPRTrainer_LGCNDataset_4.725.pth
Epoch 123/1500, Loss: 0.044455, Time: 170.892s
Test result. Precision: 2.622%@20, 1.657%@100, Recall: 5.821%@20, 18.057%@100, NDCG: 4.736%@20, 8.971%@100, Time: 5.493s
Save model to checkpoints\LightGCN_BPRTrainer_LGCNDataset_4.736.pth
Epoch 124/1500, Loss: 0.044058, Time: 170.268s
Test result. Precision: 2.631%@20, 1.658%@100, Recall: 5.837%@20, 18.063%@100, NDCG: 4.746%@20, 8.979%@100, Time: 5.436s
Save model to checkpoints\LightGCN_BPRTrainer_LGCNDataset_4.746.pth
Epoch 125/1500, Loss: 0.043992, Time: 171.016s
Test result. Precision: 2.629%@20, 1.658%@100, Recall: 5.838%@20, 18.068%@100, NDCG: 4.740%@20, 8.975%@100, Time: 5.514s
Save model to checkpoints\LightGCN_BPRTrainer_LGCNDataset_4.740.pth
Epoch 126/1500, Loss: 0.044156, Time: 170.348s
Test result. Precision: 2.634%@20, 1.661%@100, Recall: 5.845%@20, 18.071%@100, NDCG: 4.751%@20, 8.987%@100, Time: 5.436s
Save model to checkpoints\LightGCN_BPRTrainer_LGCNDataset_4.751.pth
Epoch 127/1500, Loss: 0.043624, Time: 170.678s
Test result. Precision: 2.638%@20, 1.663%@100, Recall: 5.867%@20, 18.110%@100, NDCG: 4.760%@20, 9.000%@100, Time: 5.358s
Save model to checkpoints\LightGCN_BPRTrainer_LGCNDataset_4.760.pth
Epoch 128/1500, Loss: 0.043465, Time: 170.393s
Test result. Precision: 2.643%@20, 1.667%@100, Recall: 5.865%@20, 18.156%@100, NDCG: 4.761%@20, 9.015%@100, Time: 5.456s
Save model to checkpoints\LightGCN_BPRTrainer_LGCNDataset_4.761.pth
Epoch 129/1500, Loss: 0.043281, Time: 171.860s
Test result. Precision: 2.650%@20, 1.668%@100, Recall: 5.887%@20, 18.160%@100, NDCG: 4.775%@20, 9.025%@100, Time: 5.505s
Save model to checkpoints\LightGCN_BPRTrainer_LGCNDataset_4.775.pth
Epoch 130/1500, Loss: 0.043306, Time: 173.614s
Test result. Precision: 2.648%@20, 1.669%@100, Recall: 5.876%@20, 18.171%@100, NDCG: 4.765%@20, 9.023%@100, Time: 6.065s
Save model to checkpoints\LightGCN_BPRTrainer_LGCNDataset_4.765.pth
Epoch 131/1500, Loss: 0.043107, Time: 175.406s
Test result. Precision: 2.653%@20, 1.673%@100, Recall: 5.893%@20, 18.223%@100, NDCG: 4.780%@20, 9.047%@100, Time: 5.476s
Save model to checkpoints\LightGCN_BPRTrainer_LGCNDataset_4.780.pth
Epoch 132/1500, Loss: 0.042805, Time: 174.718s
Test result. Precision: 2.651%@20, 1.670%@100, Recall: 5.882%@20, 18.203%@100, NDCG: 4.777%@20, 9.041%@100, Time: 5.561s
Save model to checkpoints\LightGCN_BPRTrainer_LGCNDataset_4.777.pth
Epoch 133/1500, Loss: 0.042737, Time: 172.523s
Test result. Precision: 2.651%@20, 1.668%@100, Recall: 5.884%@20, 18.177%@100, NDCG: 4.785%@20, 9.041%@100, Time: 5.467s
Save model to checkpoints\LightGCN_BPRTrainer_LGCNDataset_4.785.pth
Epoch 134/1500, Loss: 0.042823, Time: 170.732s
Test result. Precision: 2.663%@20, 1.671%@100, Recall: 5.910%@20, 18.231%@100, NDCG: 4.799%@20, 9.059%@100, Time: 5.480s
Save model to checkpoints\LightGCN_BPRTrainer_LGCNDataset_4.799.pth
Epoch 135/1500, Loss: 0.042897, Time: 170.410s
Test result. Precision: 2.665%@20, 1.672%@100, Recall: 5.920%@20, 18.242%@100, NDCG: 4.802%@20, 9.064%@100, Time: 5.389s
Save model to checkpoints\LightGCN_BPRTrainer_LGCNDataset_4.802.pth
Epoch 136/1500, Loss: 0.042223, Time: 171.648s
Test result. Precision: 2.665%@20, 1.676%@100, Recall: 5.925%@20, 18.262%@100, NDCG: 4.809%@20, 9.078%@100, Time: 5.467s
Save model to checkpoints\LightGCN_BPRTrainer_LGCNDataset_4.809.pth
Epoch 137/1500, Loss: 0.042186, Time: 170.417s
Test result. Precision: 2.670%@20, 1.676%@100, Recall: 5.930%@20, 18.277%@100, NDCG: 4.814%@20, 9.085%@100, Time: 5.389s
Save model to checkpoints\LightGCN_BPRTrainer_LGCNDataset_4.814.pth
Epoch 138/1500, Loss: 0.041964, Time: 170.409s
Test result. Precision: 2.675%@20, 1.677%@100, Recall: 5.946%@20, 18.294%@100, NDCG: 4.821%@20, 9.092%@100, Time: 5.327s
Save model to checkpoints\LightGCN_BPRTrainer_LGCNDataset_4.821.pth
Epoch 139/1500, Loss: 0.041745, Time: 171.080s
Test result. Precision: 2.670%@20, 1.677%@100, Recall: 5.940%@20, 18.289%@100, NDCG: 4.820%@20, 9.094%@100, Time: 5.467s
Save model to checkpoints\LightGCN_BPRTrainer_LGCNDataset_4.820.pth
Epoch 140/1500, Loss: 0.041368, Time: 170.821s
Test result. Precision: 2.672%@20, 1.677%@100, Recall: 5.938%@20, 18.291%@100, NDCG: 4.823%@20, 9.097%@100, Time: 5.664s
Save model to checkpoints\LightGCN_BPRTrainer_LGCNDataset_4.823.pth
Epoch 141/1500, Loss: 0.041547, Time: 171.682s
Test result. Precision: 2.674%@20, 1.679%@100, Recall: 5.939%@20, 18.301%@100, NDCG: 4.828%@20, 9.106%@100, Time: 5.461s
Save model to checkpoints\LightGCN_BPRTrainer_LGCNDataset_4.828.pth
Epoch 142/1500, Loss: 0.041685, Time: 170.433s
Test result. Precision: 2.675%@20, 1.683%@100, Recall: 5.938%@20, 18.355%@100, NDCG: 4.827%@20, 9.122%@100, Time: 5.554s
Save model to checkpoints\LightGCN_BPRTrainer_LGCNDataset_4.827.pth
Epoch 143/1500, Loss: 0.041784, Time: 170.323s
Test result. Precision: 2.677%@20, 1.685%@100, Recall: 5.938%@20, 18.366%@100, NDCG: 4.832%@20, 9.131%@100, Time: 5.435s
Save model to checkpoints\LightGCN_BPRTrainer_LGCNDataset_4.832.pth
Epoch 144/1500, Loss: 0.041222, Time: 170.634s
Test result. Precision: 2.685%@20, 1.685%@100, Recall: 5.969%@20, 18.371%@100, NDCG: 4.850%@20, 9.137%@100, Time: 5.436s
Save model to checkpoints\LightGCN_BPRTrainer_LGCNDataset_4.850.pth
Epoch 145/1500, Loss: 0.041025, Time: 170.141s
Test result. Precision: 2.684%@20, 1.687%@100, Recall: 5.973%@20, 18.377%@100, NDCG: 4.850%@20, 9.141%@100, Time: 5.389s
Save model to checkpoints\LightGCN_BPRTrainer_LGCNDataset_4.850.pth
Epoch 146/1500, Loss: 0.041013, Time: 170.271s
Test result. Precision: 2.684%@20, 1.688%@100, Recall: 5.965%@20, 18.399%@100, NDCG: 4.847%@20, 9.147%@100, Time: 5.389s
Save model to checkpoints\LightGCN_BPRTrainer_LGCNDataset_4.847.pth
Epoch 147/1500, Loss: 0.040968, Time: 170.727s
Test result. Precision: 2.689%@20, 1.688%@100, Recall: 5.982%@20, 18.398%@100, NDCG: 4.857%@20, 9.151%@100, Time: 5.405s
Save model to checkpoints\LightGCN_BPRTrainer_LGCNDataset_4.857.pth
Epoch 148/1500, Loss: 0.040890, Time: 170.830s
Test result. Precision: 2.686%@20, 1.689%@100, Recall: 5.975%@20, 18.400%@100, NDCG: 4.857%@20, 9.159%@100, Time: 5.485s
Save model to checkpoints\LightGCN_BPRTrainer_LGCNDataset_4.857.pth
Epoch 149/1500, Loss: 0.040616, Time: 169.856s
Test result. Precision: 2.697%@20, 1.691%@100, Recall: 5.996%@20, 18.431%@100, NDCG: 4.868%@20, 9.169%@100, Time: 5.433s
Save model to checkpoints\LightGCN_BPRTrainer_LGCNDataset_4.868.pth
Epoch 150/1500, Loss: 0.040416, Time: 170.085s
Test result. Precision: 2.697%@20, 1.691%@100, Recall: 5.999%@20, 18.432%@100, NDCG: 4.865%@20, 9.166%@100, Time: 5.436s
Save model to checkpoints\LightGCN_BPRTrainer_LGCNDataset_4.865.pth
Epoch 151/1500, Loss: 0.040488, Time: 170.144s
Test result. Precision: 2.697%@20, 1.692%@100, Recall: 6.000%@20, 18.430%@100, NDCG: 4.878%@20, 9.179%@100, Time: 5.327s
Save model to checkpoints\LightGCN_BPRTrainer_LGCNDataset_4.878.pth
Epoch 152/1500, Loss: 0.040115, Time: 170.542s
Test result. Precision: 2.699%@20, 1.694%@100, Recall: 5.998%@20, 18.451%@100, NDCG: 4.885%@20, 9.194%@100, Time: 5.374s
Save model to checkpoints\LightGCN_BPRTrainer_LGCNDataset_4.885.pth
Epoch 153/1500, Loss: 0.040137, Time: 170.510s
Test result. Precision: 2.700%@20, 1.694%@100, Recall: 6.002%@20, 18.450%@100, NDCG: 4.881%@20, 9.188%@100, Time: 5.483s
Save model to checkpoints\LightGCN_BPRTrainer_LGCNDataset_4.881.pth
Epoch 154/1500, Loss: 0.039969, Time: 170.444s
Test result. Precision: 2.698%@20, 1.694%@100, Recall: 6.006%@20, 18.468%@100, NDCG: 4.878%@20, 9.189%@100, Time: 5.499s
Save model to checkpoints\LightGCN_BPRTrainer_LGCNDataset_4.878.pth
Epoch 155/1500, Loss: 0.039803, Time: 170.615s
Test result. Precision: 2.692%@20, 1.696%@100, Recall: 5.983%@20, 18.481%@100, NDCG: 4.878%@20, 9.204%@100, Time: 5.482s
Save model to checkpoints\LightGCN_BPRTrainer_LGCNDataset_4.878.pth
Epoch 156/1500, Loss: 0.039798, Time: 170.336s
Test result. Precision: 2.700%@20, 1.698%@100, Recall: 6.002%@20, 18.497%@100, NDCG: 4.892%@20, 9.216%@100, Time: 5.420s
Save model to checkpoints\LightGCN_BPRTrainer_LGCNDataset_4.892.pth
Epoch 157/1500, Loss: 0.039333, Time: 170.511s
Test result. Precision: 2.701%@20, 1.699%@100, Recall: 6.002%@20, 18.498%@100, NDCG: 4.892%@20, 9.216%@100, Time: 5.374s
Save model to checkpoints\LightGCN_BPRTrainer_LGCNDataset_4.892.pth
Epoch 158/1500, Loss: 0.039473, Time: 171.133s
Test result. Precision: 2.698%@20, 1.698%@100, Recall: 6.002%@20, 18.478%@100, NDCG: 4.891%@20, 9.213%@100, Time: 5.358s
Save model to checkpoints\LightGCN_BPRTrainer_LGCNDataset_4.891.pth
Epoch 159/1500, Loss: 0.039340, Time: 170.721s
Test result. Precision: 2.700%@20, 1.699%@100, Recall: 5.995%@20, 18.500%@100, NDCG: 4.888%@20, 9.218%@100, Time: 5.358s
Save model to checkpoints\LightGCN_BPRTrainer_LGCNDataset_4.888.pth
Epoch 160/1500, Loss: 0.039579, Time: 170.828s
Test result. Precision: 2.699%@20, 1.698%@100, Recall: 6.008%@20, 18.491%@100, NDCG: 4.892%@20, 9.217%@100, Time: 5.394s
Save model to checkpoints\LightGCN_BPRTrainer_LGCNDataset_4.892.pth
Epoch 161/1500, Loss: 0.039166, Time: 171.043s
Test result. Precision: 2.709%@20, 1.704%@100, Recall: 6.013%@20, 18.542%@100, NDCG: 4.904%@20, 9.244%@100, Time: 5.374s
Save model to checkpoints\LightGCN_BPRTrainer_LGCNDataset_4.904.pth
Epoch 162/1500, Loss: 0.039119, Time: 170.524s
Test result. Precision: 2.708%@20, 1.703%@100, Recall: 6.027%@20, 18.535%@100, NDCG: 4.910%@20, 9.244%@100, Time: 5.430s
Save model to checkpoints\LightGCN_BPRTrainer_LGCNDataset_4.910.pth
Epoch 163/1500, Loss: 0.038939, Time: 170.652s
Test result. Precision: 2.706%@20, 1.705%@100, Recall: 6.019%@20, 18.553%@100, NDCG: 4.905%@20, 9.248%@100, Time: 5.441s
Save model to checkpoints\LightGCN_BPRTrainer_LGCNDataset_4.905.pth
Epoch 164/1500, Loss: 0.039001, Time: 170.623s
Test result. Precision: 2.710%@20, 1.705%@100, Recall: 6.034%@20, 18.559%@100, NDCG: 4.912%@20, 9.251%@100, Time: 5.500s
Save model to checkpoints\LightGCN_BPRTrainer_LGCNDataset_4.912.pth
Epoch 165/1500, Loss: 0.038474, Time: 170.260s
Test result. Precision: 2.710%@20, 1.705%@100, Recall: 6.032%@20, 18.574%@100, NDCG: 4.912%@20, 9.254%@100, Time: 5.358s
Save model to checkpoints\LightGCN_BPRTrainer_LGCNDataset_4.912.pth
Epoch 166/1500, Loss: 0.038811, Time: 170.678s
Test result. Precision: 2.716%@20, 1.708%@100, Recall: 6.042%@20, 18.595%@100, NDCG: 4.913%@20, 9.260%@100, Time: 5.483s
Save model to checkpoints\LightGCN_BPRTrainer_LGCNDataset_4.913.pth
Epoch 167/1500, Loss: 0.038779, Time: 169.935s
Test result. Precision: 2.716%@20, 1.710%@100, Recall: 6.049%@20, 18.617%@100, NDCG: 4.921%@20, 9.274%@100, Time: 5.389s
Save model to checkpoints\LightGCN_BPRTrainer_LGCNDataset_4.921.pth
Epoch 168/1500, Loss: 0.038695, Time: 171.194s
Test result. Precision: 2.718%@20, 1.710%@100, Recall: 6.048%@20, 18.625%@100, NDCG: 4.929%@20, 9.285%@100, Time: 5.436s
Save model to checkpoints\LightGCN_BPRTrainer_LGCNDataset_4.929.pth
Epoch 169/1500, Loss: 0.038349, Time: 171.171s
Test result. Precision: 2.713%@20, 1.709%@100, Recall: 6.028%@20, 18.610%@100, NDCG: 4.920%@20, 9.277%@100, Time: 5.555s
Save model to checkpoints\LightGCN_BPRTrainer_LGCNDataset_4.920.pth
Epoch 170/1500, Loss: 0.038278, Time: 171.388s
Test result. Precision: 2.715%@20, 1.711%@100, Recall: 6.026%@20, 18.642%@100, NDCG: 4.924%@20, 9.291%@100, Time: 5.551s
Save model to checkpoints\LightGCN_BPRTrainer_LGCNDataset_4.924.pth
Epoch 171/1500, Loss: 0.038332, Time: 170.475s
Test result. Precision: 2.720%@20, 1.715%@100, Recall: 6.037%@20, 18.683%@100, NDCG: 4.932%@20, 9.309%@100, Time: 5.412s
Save model to checkpoints\LightGCN_BPRTrainer_LGCNDataset_4.932.pth
Epoch 172/1500, Loss: 0.037961, Time: 170.547s
Test result. Precision: 2.712%@20, 1.716%@100, Recall: 6.032%@20, 18.689%@100, NDCG: 4.926%@20, 9.311%@100, Time: 5.547s
Save model to checkpoints\LightGCN_BPRTrainer_LGCNDataset_4.926.pth
Epoch 173/1500, Loss: 0.038475, Time: 171.639s
Test result. Precision: 2.712%@20, 1.716%@100, Recall: 6.034%@20, 18.691%@100, NDCG: 4.922%@20, 9.309%@100, Time: 5.467s
Save model to checkpoints\LightGCN_BPRTrainer_LGCNDataset_4.922.pth
Epoch 174/1500, Loss: 0.038080, Time: 170.851s
Test result. Precision: 2.712%@20, 1.716%@100, Recall: 6.029%@20, 18.689%@100, NDCG: 4.924%@20, 9.310%@100, Time: 5.671s
Save model to checkpoints\LightGCN_BPRTrainer_LGCNDataset_4.924.pth
Epoch 175/1500, Loss: 0.037551, Time: 170.635s
Test result. Precision: 2.712%@20, 1.717%@100, Recall: 6.029%@20, 18.699%@100, NDCG: 4.930%@20, 9.321%@100, Time: 5.483s
Save model to checkpoints\LightGCN_BPRTrainer_LGCNDataset_4.930.pth
Epoch 176/1500, Loss: 0.037779, Time: 170.218s
Test result. Precision: 2.717%@20, 1.719%@100, Recall: 6.046%@20, 18.717%@100, NDCG: 4.932%@20, 9.323%@100, Time: 5.342s
Save model to checkpoints\LightGCN_BPRTrainer_LGCNDataset_4.932.pth
Epoch 177/1500, Loss: 0.037626, Time: 170.196s
Test result. Precision: 2.715%@20, 1.719%@100, Recall: 6.038%@20, 18.714%@100, NDCG: 4.927%@20, 9.322%@100, Time: 5.405s
Save model to checkpoints\LightGCN_BPRTrainer_LGCNDataset_4.927.pth
Epoch 178/1500, Loss: 0.037180, Time: 170.127s
Test result. Precision: 2.716%@20, 1.717%@100, Recall: 6.041%@20, 18.696%@100, NDCG: 4.938%@20, 9.326%@100, Time: 5.435s
Save model to checkpoints\LightGCN_BPRTrainer_LGCNDataset_4.938.pth
Epoch 179/1500, Loss: 0.036939, Time: 170.383s
Test result. Precision: 2.724%@20, 1.719%@100, Recall: 6.060%@20, 18.730%@100, NDCG: 4.945%@20, 9.334%@100, Time: 5.436s
Save model to checkpoints\LightGCN_BPRTrainer_LGCNDataset_4.945.pth
Epoch 180/1500, Loss: 0.037122, Time: 170.601s
Test result. Precision: 2.720%@20, 1.721%@100, Recall: 6.052%@20, 18.744%@100, NDCG: 4.947%@20, 9.346%@100, Time: 5.474s
Save model to checkpoints\LightGCN_BPRTrainer_LGCNDataset_4.947.pth
Epoch 181/1500, Loss: 0.037208, Time: 170.660s
Test result. Precision: 2.726%@20, 1.721%@100, Recall: 6.060%@20, 18.738%@100, NDCG: 4.953%@20, 9.348%@100, Time: 5.436s
Save model to checkpoints\LightGCN_BPRTrainer_LGCNDataset_4.953.pth
Epoch 182/1500, Loss: 0.037276, Time: 170.225s
Test result. Precision: 2.732%@20, 1.723%@100, Recall: 6.074%@20, 18.778%@100, NDCG: 4.958%@20, 9.357%@100, Time: 5.421s
Save model to checkpoints\LightGCN_BPRTrainer_LGCNDataset_4.958.pth
Epoch 183/1500, Loss: 0.037165, Time: 170.708s
Test result. Precision: 2.734%@20, 1.724%@100, Recall: 6.085%@20, 18.785%@100, NDCG: 4.963%@20, 9.362%@100, Time: 5.530s
Save model to checkpoints\LightGCN_BPRTrainer_LGCNDataset_4.963.pth
Epoch 184/1500, Loss: 0.036998, Time: 170.180s
Test result. Precision: 2.736%@20, 1.728%@100, Recall: 6.095%@20, 18.810%@100, NDCG: 4.968%@20, 9.374%@100, Time: 5.374s
Save model to checkpoints\LightGCN_BPRTrainer_LGCNDataset_4.968.pth
Epoch 185/1500, Loss: 0.036551, Time: 170.332s
Test result. Precision: 2.738%@20, 1.729%@100, Recall: 6.091%@20, 18.811%@100, NDCG: 4.973%@20, 9.381%@100, Time: 5.518s
Save model to checkpoints\LightGCN_BPRTrainer_LGCNDataset_4.973.pth
Epoch 186/1500, Loss: 0.036798, Time: 170.335s
Test result. Precision: 2.740%@20, 1.730%@100, Recall: 6.095%@20, 18.835%@100, NDCG: 4.976%@20, 9.391%@100, Time: 5.517s
Save model to checkpoints\LightGCN_BPRTrainer_LGCNDataset_4.976.pth
Epoch 187/1500, Loss: 0.037023, Time: 170.301s
Test result. Precision: 2.737%@20, 1.730%@100, Recall: 6.085%@20, 18.841%@100, NDCG: 4.979%@20, 9.398%@100, Time: 5.481s
Save model to checkpoints\LightGCN_BPRTrainer_LGCNDataset_4.979.pth
Epoch 188/1500, Loss: 0.036828, Time: 170.668s
Test result. Precision: 2.738%@20, 1.729%@100, Recall: 6.091%@20, 18.845%@100, NDCG: 4.982%@20, 9.399%@100, Time: 5.436s
Save model to checkpoints\LightGCN_BPRTrainer_LGCNDataset_4.982.pth
Epoch 189/1500, Loss: 0.036593, Time: 170.198s
Test result. Precision: 2.741%@20, 1.730%@100, Recall: 6.103%@20, 18.847%@100, NDCG: 4.988%@20, 9.403%@100, Time: 5.405s
Save model to checkpoints\LightGCN_BPRTrainer_LGCNDataset_4.988.pth
Epoch 190/1500, Loss: 0.036611, Time: 170.439s
Test result. Precision: 2.740%@20, 1.731%@100, Recall: 6.096%@20, 18.879%@100, NDCG: 4.980%@20, 9.405%@100, Time: 5.530s
Save model to checkpoints\LightGCN_BPRTrainer_LGCNDataset_4.980.pth
Epoch 191/1500, Loss: 0.036295, Time: 170.496s
Test result. Precision: 2.747%@20, 1.734%@100, Recall: 6.116%@20, 18.899%@100, NDCG: 4.993%@20, 9.418%@100, Time: 5.608s
Save model to checkpoints\LightGCN_BPRTrainer_LGCNDataset_4.993.pth
Epoch 192/1500, Loss: 0.036251, Time: 170.584s
Test result. Precision: 2.756%@20, 1.735%@100, Recall: 6.126%@20, 18.903%@100, NDCG: 5.001%@20, 9.424%@100, Time: 5.468s
Save model to checkpoints\LightGCN_BPRTrainer_LGCNDataset_5.001.pth
Epoch 193/1500, Loss: 0.036194, Time: 170.499s
Test result. Precision: 2.753%@20, 1.737%@100, Recall: 6.131%@20, 18.910%@100, NDCG: 5.002%@20, 9.428%@100, Time: 5.585s
Save model to checkpoints\LightGCN_BPRTrainer_LGCNDataset_5.002.pth
Epoch 194/1500, Loss: 0.036340, Time: 170.020s
Test result. Precision: 2.751%@20, 1.736%@100, Recall: 6.125%@20, 18.909%@100, NDCG: 5.002%@20, 9.429%@100, Time: 5.463s
Save model to checkpoints\LightGCN_BPRTrainer_LGCNDataset_5.002.pth
Epoch 195/1500, Loss: 0.035882, Time: 170.578s
Test result. Precision: 2.747%@20, 1.737%@100, Recall: 6.115%@20, 18.924%@100, NDCG: 4.993%@20, 9.429%@100, Time: 5.499s
Save model to checkpoints\LightGCN_BPRTrainer_LGCNDataset_4.993.pth
Epoch 196/1500, Loss: 0.035778, Time: 170.198s
Test result. Precision: 2.752%@20, 1.736%@100, Recall: 6.126%@20, 18.929%@100, NDCG: 5.001%@20, 9.432%@100, Time: 5.436s
Save model to checkpoints\LightGCN_BPRTrainer_LGCNDataset_5.001.pth
Epoch 197/1500, Loss: 0.035770, Time: 170.138s
Test result. Precision: 2.761%@20, 1.738%@100, Recall: 6.148%@20, 18.935%@100, NDCG: 5.017%@20, 9.443%@100, Time: 5.421s
Save model to checkpoints\LightGCN_BPRTrainer_LGCNDataset_5.017.pth
Epoch 198/1500, Loss: 0.035993, Time: 170.336s
Test result. Precision: 2.754%@20, 1.739%@100, Recall: 6.126%@20, 18.940%@100, NDCG: 5.006%@20, 9.444%@100, Time: 5.405s
Save model to checkpoints\LightGCN_BPRTrainer_LGCNDataset_5.006.pth
Epoch 199/1500, Loss: 0.035986, Time: 170.307s
Test result. Precision: 2.756%@20, 1.740%@100, Recall: 6.129%@20, 18.960%@100, NDCG: 5.009%@20, 9.451%@100, Time: 5.436s
Save model to checkpoints\LightGCN_BPRTrainer_LGCNDataset_5.009.pth
Epoch 200/1500, Loss: 0.035689, Time: 170.173s
Test result. Precision: 2.752%@20, 1.742%@100, Recall: 6.125%@20, 18.981%@100, NDCG: 5.008%@20, 9.460%@100, Time: 5.380s
Save model to checkpoints\LightGCN_BPRTrainer_LGCNDataset_5.008.pth
Epoch 201/1500, Loss: 0.035545, Time: 170.129s
Test result. Precision: 2.761%@20, 1.742%@100, Recall: 6.155%@20, 18.988%@100, NDCG: 5.019%@20, 9.462%@100, Time: 5.433s
Save model to checkpoints\LightGCN_BPRTrainer_LGCNDataset_5.019.pth
Epoch 202/1500, Loss: 0.035713, Time: 170.116s
Test result. Precision: 2.762%@20, 1.742%@100, Recall: 6.160%@20, 18.985%@100, NDCG: 5.017%@20, 9.459%@100, Time: 5.467s
Save model to checkpoints\LightGCN_BPRTrainer_LGCNDataset_5.017.pth
Epoch 203/1500, Loss: 0.035534, Time: 170.393s
Test result. Precision: 2.771%@20, 1.743%@100, Recall: 6.170%@20, 18.990%@100, NDCG: 5.033%@20, 9.472%@100, Time: 5.358s
Save model to checkpoints\LightGCN_BPRTrainer_LGCNDataset_5.033.pth
Epoch 204/1500, Loss: 0.035430, Time: 170.137s
Test result. Precision: 2.774%@20, 1.745%@100, Recall: 6.178%@20, 19.010%@100, NDCG: 5.032%@20, 9.474%@100, Time: 5.452s
Save model to checkpoints\LightGCN_BPRTrainer_LGCNDataset_5.032.pth
Epoch 205/1500, Loss: 0.035237, Time: 170.371s
Test result. Precision: 2.773%@20, 1.745%@100, Recall: 6.182%@20, 18.994%@100, NDCG: 5.040%@20, 9.479%@100, Time: 5.421s
Save model to checkpoints\LightGCN_BPRTrainer_LGCNDataset_5.040.pth
Epoch 206/1500, Loss: 0.035222, Time: 170.547s
Test result. Precision: 2.773%@20, 1.748%@100, Recall: 6.178%@20, 19.042%@100, NDCG: 5.038%@20, 9.493%@100, Time: 5.427s
Save model to checkpoints\LightGCN_BPRTrainer_LGCNDataset_5.038.pth
Epoch 207/1500, Loss: 0.034794, Time: 170.469s
Test result. Precision: 2.775%@20, 1.749%@100, Recall: 6.184%@20, 19.040%@100, NDCG: 5.035%@20, 9.488%@100, Time: 5.508s
Save model to checkpoints\LightGCN_BPRTrainer_LGCNDataset_5.035.pth
Epoch 208/1500, Loss: 0.034820, Time: 170.876s
Test result. Precision: 2.773%@20, 1.750%@100, Recall: 6.180%@20, 19.047%@100, NDCG: 5.036%@20, 9.494%@100, Time: 5.449s
Save model to checkpoints\LightGCN_BPRTrainer_LGCNDataset_5.036.pth
Epoch 209/1500, Loss: 0.034982, Time: 109.929s
Test result. Precision: 2.778%@20, 1.749%@100, Recall: 6.194%@20, 19.045%@100, NDCG: 5.039%@20, 9.491%@100, Time: 5.358s
Save model to checkpoints\LightGCN_BPRTrainer_LGCNDataset_5.039.pth
Epoch 210/1500, Loss: 0.034883, Time: 170.656s
Test result. Precision: 2.775%@20, 1.751%@100, Recall: 6.180%@20, 19.050%@100, NDCG: 5.028%@20, 9.487%@100, Time: 5.377s
Save model to checkpoints\LightGCN_BPRTrainer_LGCNDataset_5.028.pth
Epoch 211/1500, Loss: 0.035029, Time: 170.416s
Test result. Precision: 2.774%@20, 1.749%@100, Recall: 6.182%@20, 19.048%@100, NDCG: 5.027%@20, 9.483%@100, Time: 5.374s
Save model to checkpoints\LightGCN_BPRTrainer_LGCNDataset_5.027.pth
Epoch 212/1500, Loss: 0.034687, Time: 170.157s
Test result. Precision: 2.781%@20, 1.749%@100, Recall: 6.204%@20, 19.051%@100, NDCG: 5.044%@20, 9.492%@100, Time: 5.389s
Save model to checkpoints\LightGCN_BPRTrainer_LGCNDataset_5.044.pth
Epoch 213/1500, Loss: 0.034642, Time: 170.471s
Test result. Precision: 2.783%@20, 1.748%@100, Recall: 6.207%@20, 19.049%@100, NDCG: 5.047%@20, 9.492%@100, Time: 5.483s
Save model to checkpoints\LightGCN_BPRTrainer_LGCNDataset_5.047.pth
Epoch 214/1500, Loss: 0.034688, Time: 170.800s
Test result. Precision: 2.781%@20, 1.751%@100, Recall: 6.201%@20, 19.071%@100, NDCG: 5.045%@20, 9.501%@100, Time: 5.442s
Save model to checkpoints\LightGCN_BPRTrainer_LGCNDataset_5.045.pth
Epoch 215/1500, Loss: 0.034720, Time: 170.408s
Test result. Precision: 2.785%@20, 1.753%@100, Recall: 6.218%@20, 19.089%@100, NDCG: 5.055%@20, 9.512%@100, Time: 5.438s
Save model to checkpoints\LightGCN_BPRTrainer_LGCNDataset_5.055.pth
Epoch 216/1500, Loss: 0.034638, Time: 170.427s
Test result. Precision: 2.789%@20, 1.753%@100, Recall: 6.223%@20, 19.081%@100, NDCG: 5.055%@20, 9.509%@100, Time: 5.389s
Save model to checkpoints\LightGCN_BPRTrainer_LGCNDataset_5.055.pth
Epoch 217/1500, Loss: 0.034552, Time: 170.431s
Test result. Precision: 2.793%@20, 1.757%@100, Recall: 6.232%@20, 19.124%@100, NDCG: 5.063%@20, 9.529%@100, Time: 5.530s
Save model to checkpoints\LightGCN_BPRTrainer_LGCNDataset_5.063.pth
Epoch 218/1500, Loss: 0.034129, Time: 170.274s
Test result. Precision: 2.794%@20, 1.756%@100, Recall: 6.229%@20, 19.115%@100, NDCG: 5.065%@20, 9.528%@100, Time: 5.374s
Save model to checkpoints\LightGCN_BPRTrainer_LGCNDataset_5.065.pth
Epoch 219/1500, Loss: 0.034185, Time: 170.304s
Test result. Precision: 2.793%@20, 1.756%@100, Recall: 6.228%@20, 19.117%@100, NDCG: 5.063%@20, 9.527%@100, Time: 5.374s
Save model to checkpoints\LightGCN_BPRTrainer_LGCNDataset_5.063.pth
Epoch 220/1500, Loss: 0.034297, Time: 171.151s
Test result. Precision: 2.783%@20, 1.757%@100, Recall: 6.199%@20, 19.113%@100, NDCG: 5.055%@20, 9.534%@100, Time: 5.530s
Save model to checkpoints\LightGCN_BPRTrainer_LGCNDataset_5.055.pth
Epoch 221/1500, Loss: 0.034210, Time: 169.764s
Test result. Precision: 2.789%@20, 1.756%@100, Recall: 6.226%@20, 19.118%@100, NDCG: 5.068%@20, 9.537%@100, Time: 5.379s
Save model to checkpoints\LightGCN_BPRTrainer_LGCNDataset_5.068.pth
Epoch 222/1500, Loss: 0.034047, Time: 169.851s
Test result. Precision: 2.783%@20, 1.756%@100, Recall: 6.208%@20, 19.105%@100, NDCG: 5.061%@20, 9.534%@100, Time: 5.540s
Save model to checkpoints\LightGCN_BPRTrainer_LGCNDataset_5.061.pth
Epoch 223/1500, Loss: 0.034012, Time: 170.027s
Test result. Precision: 2.797%@20, 1.758%@100, Recall: 6.235%@20, 19.125%@100, NDCG: 5.084%@20, 9.550%@100, Time: 5.358s
Save model to checkpoints\LightGCN_BPRTrainer_LGCNDataset_5.084.pth
Epoch 224/1500, Loss: 0.033762, Time: 170.022s
Test result. Precision: 2.795%@20, 1.759%@100, Recall: 6.231%@20, 19.127%@100, NDCG: 5.079%@20, 9.549%@100, Time: 5.374s
Save model to checkpoints\LightGCN_BPRTrainer_LGCNDataset_5.079.pth
Epoch 225/1500, Loss: 0.034033, Time: 170.145s
Test result. Precision: 2.794%@20, 1.757%@100, Recall: 6.228%@20, 19.108%@100, NDCG: 5.076%@20, 9.542%@100, Time: 5.405s
Save model to checkpoints\LightGCN_BPRTrainer_LGCNDataset_5.076.pth
Epoch 226/1500, Loss: 0.033829, Time: 170.587s
Test result. Precision: 2.791%@20, 1.759%@100, Recall: 6.226%@20, 19.130%@100, NDCG: 5.074%@20, 9.548%@100, Time: 5.499s
Save model to checkpoints\LightGCN_BPRTrainer_LGCNDataset_5.074.pth
Epoch 227/1500, Loss: 0.033993, Time: 170.402s
Test result. Precision: 2.793%@20, 1.759%@100, Recall: 6.226%@20, 19.129%@100, NDCG: 5.078%@20, 9.552%@100, Time: 5.358s
Save model to checkpoints\LightGCN_BPRTrainer_LGCNDataset_5.078.pth
Epoch 228/1500, Loss: 0.033583, Time: 169.707s
Test result. Precision: 2.794%@20, 1.761%@100, Recall: 6.229%@20, 19.154%@100, NDCG: 5.076%@20, 9.555%@100, Time: 5.327s
Save model to checkpoints\LightGCN_BPRTrainer_LGCNDataset_5.076.pth
Epoch 229/1500, Loss: 0.033754, Time: 170.088s
Test result. Precision: 2.790%@20, 1.761%@100, Recall: 6.224%@20, 19.164%@100, NDCG: 5.078%@20, 9.564%@100, Time: 5.483s
Save model to checkpoints\LightGCN_BPRTrainer_LGCNDataset_5.078.pth
Epoch 230/1500, Loss: 0.033832, Time: 170.150s
Test result. Precision: 2.798%@20, 1.762%@100, Recall: 6.244%@20, 19.171%@100, NDCG: 5.091%@20, 9.573%@100, Time: 5.327s
Save model to checkpoints\LightGCN_BPRTrainer_LGCNDataset_5.091.pth
Epoch 231/1500, Loss: 0.033630, Time: 171.001s
Test result. Precision: 2.797%@20, 1.764%@100, Recall: 6.228%@20, 19.190%@100, NDCG: 5.091%@20, 9.586%@100, Time: 5.546s
Save model to checkpoints\LightGCN_BPRTrainer_LGCNDataset_5.091.pth
Epoch 232/1500, Loss: 0.033780, Time: 171.082s
Test result. Precision: 2.800%@20, 1.763%@100, Recall: 6.235%@20, 19.183%@100, NDCG: 5.095%@20, 9.584%@100, Time: 5.674s
Save model to checkpoints\LightGCN_BPRTrainer_LGCNDataset_5.095.pth
Epoch 233/1500, Loss: 0.033516, Time: 171.039s
Test result. Precision: 2.800%@20, 1.763%@100, Recall: 6.239%@20, 19.186%@100, NDCG: 5.095%@20, 9.586%@100, Time: 5.428s
Save model to checkpoints\LightGCN_BPRTrainer_LGCNDataset_5.095.pth
Epoch 234/1500, Loss: 0.033457, Time: 170.033s
Test result. Precision: 2.805%@20, 1.766%@100, Recall: 6.250%@20, 19.222%@100, NDCG: 5.094%@20, 9.590%@100, Time: 5.436s
Save model to checkpoints\LightGCN_BPRTrainer_LGCNDataset_5.094.pth
Epoch 235/1500, Loss: 0.033300, Time: 169.823s
Test result. Precision: 2.806%@20, 1.764%@100, Recall: 6.253%@20, 19.193%@100, NDCG: 5.096%@20, 9.584%@100, Time: 5.405s
Save model to checkpoints\LightGCN_BPRTrainer_LGCNDataset_5.096.pth
Epoch 236/1500, Loss: 0.033285, Time: 170.759s
Test result. Precision: 2.811%@20, 1.766%@100, Recall: 6.259%@20, 19.207%@100, NDCG: 5.107%@20, 9.596%@100, Time: 5.483s
Save model to checkpoints\LightGCN_BPRTrainer_LGCNDataset_5.107.pth
Epoch 237/1500, Loss: 0.033249, Time: 170.245s
Test result. Precision: 2.810%@20, 1.765%@100, Recall: 6.264%@20, 19.201%@100, NDCG: 5.106%@20, 9.590%@100, Time: 5.421s
Save model to checkpoints\LightGCN_BPRTrainer_LGCNDataset_5.106.pth
Epoch 238/1500, Loss: 0.033277, Time: 170.267s
Test result. Precision: 2.806%@20, 1.764%@100, Recall: 6.252%@20, 19.196%@100, NDCG: 5.105%@20, 9.593%@100, Time: 5.596s
Save model to checkpoints\LightGCN_BPRTrainer_LGCNDataset_5.105.pth
Epoch 239/1500, Loss: 0.033273, Time: 169.965s
Test result. Precision: 2.814%@20, 1.766%@100, Recall: 6.273%@20, 19.216%@100, NDCG: 5.107%@20, 9.593%@100, Time: 5.527s
Save model to checkpoints\LightGCN_BPRTrainer_LGCNDataset_5.107.pth
Epoch 240/1500, Loss: 0.033057, Time: 170.477s
Test result. Precision: 2.811%@20, 1.767%@100, Recall: 6.262%@20, 19.218%@100, NDCG: 5.105%@20, 9.597%@100, Time: 5.405s
Save model to checkpoints\LightGCN_BPRTrainer_LGCNDataset_5.105.pth
Epoch 241/1500, Loss: 0.033008, Time: 170.703s
Test result. Precision: 2.814%@20, 1.765%@100, Recall: 6.273%@20, 19.205%@100, NDCG: 5.112%@20, 9.596%@100, Time: 5.759s
Save model to checkpoints\LightGCN_BPRTrainer_LGCNDataset_5.112.pth
Epoch 242/1500, Loss: 0.033047, Time: 171.396s
Test result. Precision: 2.819%@20, 1.768%@100, Recall: 6.291%@20, 19.229%@100, NDCG: 5.121%@20, 9.607%@100, Time: 5.792s
Save model to checkpoints\LightGCN_BPRTrainer_LGCNDataset_5.121.pth
Epoch 243/1500, Loss: 0.033056, Time: 171.001s
Test result. Precision: 2.819%@20, 1.768%@100, Recall: 6.278%@20, 19.228%@100, NDCG: 5.111%@20, 9.601%@100, Time: 5.551s
Save model to checkpoints\LightGCN_BPRTrainer_LGCNDataset_5.111.pth
Epoch 244/1500, Loss: 0.033009, Time: 170.483s
Test result. Precision: 2.822%@20, 1.769%@100, Recall: 6.294%@20, 19.234%@100, NDCG: 5.125%@20, 9.611%@100, Time: 5.539s
Save model to checkpoints\LightGCN_BPRTrainer_LGCNDataset_5.125.pth
Epoch 245/1500, Loss: 0.032992, Time: 170.874s
Test result. Precision: 2.823%@20, 1.772%@100, Recall: 6.294%@20, 19.264%@100, NDCG: 5.123%@20, 9.620%@100, Time: 5.452s
Save model to checkpoints\LightGCN_BPRTrainer_LGCNDataset_5.123.pth
Epoch 246/1500, Loss: 0.032682, Time: 170.522s
Test result. Precision: 2.828%@20, 1.770%@100, Recall: 6.304%@20, 19.236%@100, NDCG: 5.132%@20, 9.616%@100, Time: 5.421s
Save model to checkpoints\LightGCN_BPRTrainer_LGCNDataset_5.132.pth
Epoch 247/1500, Loss: 0.033010, Time: 169.851s
Test result. Precision: 2.825%@20, 1.770%@100, Recall: 6.297%@20, 19.242%@100, NDCG: 5.122%@20, 9.611%@100, Time: 5.358s
Save model to checkpoints\LightGCN_BPRTrainer_LGCNDataset_5.122.pth
Epoch 248/1500, Loss: 0.032644, Time: 170.277s
Test result. Precision: 2.832%@20, 1.773%@100, Recall: 6.313%@20, 19.281%@100, NDCG: 5.133%@20, 9.628%@100, Time: 5.467s
Save model to checkpoints\LightGCN_BPRTrainer_LGCNDataset_5.133.pth
Epoch 249/1500, Loss: 0.032553, Time: 169.908s
Test result. Precision: 2.833%@20, 1.773%@100, Recall: 6.319%@20, 19.278%@100, NDCG: 5.136%@20, 9.628%@100, Time: 5.546s
Save model to checkpoints\LightGCN_BPRTrainer_LGCNDataset_5.136.pth
Epoch 250/1500, Loss: 0.032665, Time: 170.364s
Test result. Precision: 2.827%@20, 1.772%@100, Recall: 6.309%@20, 19.269%@100, NDCG: 5.131%@20, 9.626%@100, Time: 5.421s
Save model to checkpoints\LightGCN_BPRTrainer_LGCNDataset_5.131.pth
Epoch 251/1500, Loss: 0.032841, Time: 169.792s
Test result. Precision: 2.830%@20, 1.771%@100, Recall: 6.315%@20, 19.278%@100, NDCG: 5.133%@20, 9.628%@100, Time: 5.467s
Save model to checkpoints\LightGCN_BPRTrainer_LGCNDataset_5.133.pth
Epoch 252/1500, Loss: 0.032346, Time: 169.725s
Test result. Precision: 2.820%@20, 1.772%@100, Recall: 6.285%@20, 19.269%@100, NDCG: 5.121%@20, 9.625%@100, Time: 5.389s
Save model to checkpoints\LightGCN_BPRTrainer_LGCNDataset_5.121.pth
Epoch 253/1500, Loss: 0.032169, Time: 169.835s
Test result. Precision: 2.825%@20, 1.772%@100, Recall: 6.304%@20, 19.274%@100, NDCG: 5.127%@20, 9.627%@100, Time: 5.452s
Save model to checkpoints\LightGCN_BPRTrainer_LGCNDataset_5.127.pth
Epoch 254/1500, Loss: 0.032678, Time: 169.783s
Test result. Precision: 2.825%@20, 1.772%@100, Recall: 6.289%@20, 19.287%@100, NDCG: 5.123%@20, 9.629%@100, Time: 5.452s
Save model to checkpoints\LightGCN_BPRTrainer_LGCNDataset_5.123.pth
Epoch 255/1500, Loss: 0.032286, Time: 170.085s
Test result. Precision: 2.832%@20, 1.772%@100, Recall: 6.308%@20, 19.280%@100, NDCG: 5.137%@20, 9.634%@100, Time: 5.389s
Save model to checkpoints\LightGCN_BPRTrainer_LGCNDataset_5.137.pth
Epoch 256/1500, Loss: 0.032393, Time: 170.239s
Test result. Precision: 2.835%@20, 1.777%@100, Recall: 6.318%@20, 19.343%@100, NDCG: 5.146%@20, 9.661%@100, Time: 5.421s
Save model to checkpoints\LightGCN_BPRTrainer_LGCNDataset_5.146.pth
Epoch 257/1500, Loss: 0.032419, Time: 170.433s
Test result. Precision: 2.833%@20, 1.778%@100, Recall: 6.313%@20, 19.349%@100, NDCG: 5.152%@20, 9.672%@100, Time: 5.327s
Save model to checkpoints\LightGCN_BPRTrainer_LGCNDataset_5.152.pth
Epoch 258/1500, Loss: 0.032351, Time: 170.626s
Test result. Precision: 2.835%@20, 1.779%@100, Recall: 6.315%@20, 19.357%@100, NDCG: 5.152%@20, 9.673%@100, Time: 5.530s
Save model to checkpoints\LightGCN_BPRTrainer_LGCNDataset_5.152.pth
Epoch 259/1500, Loss: 0.032048, Time: 170.711s
Test result. Precision: 2.843%@20, 1.780%@100, Recall: 6.333%@20, 19.360%@100, NDCG: 5.167%@20, 9.682%@100, Time: 5.421s
Save model to checkpoints\LightGCN_BPRTrainer_LGCNDataset_5.167.pth
Epoch 260/1500, Loss: 0.032000, Time: 170.697s
Test result. Precision: 2.845%@20, 1.779%@100, Recall: 6.341%@20, 19.368%@100, NDCG: 5.168%@20, 9.681%@100, Time: 5.514s
Save model to checkpoints\LightGCN_BPRTrainer_LGCNDataset_5.168.pth
Epoch 261/1500, Loss: 0.031946, Time: 170.620s
Test result. Precision: 2.842%@20, 1.780%@100, Recall: 6.329%@20, 19.377%@100, NDCG: 5.160%@20, 9.681%@100, Time: 5.374s
Save model to checkpoints\LightGCN_BPRTrainer_LGCNDataset_5.160.pth
Epoch 262/1500, Loss: 0.031973, Time: 170.002s
Test result. Precision: 2.831%@20, 1.778%@100, Recall: 6.312%@20, 19.346%@100, NDCG: 5.145%@20, 9.668%@100, Time: 5.499s
Save model to checkpoints\LightGCN_BPRTrainer_LGCNDataset_5.145.pth
Epoch 263/1500, Loss: 0.032032, Time: 169.585s
Test result. Precision: 2.843%@20, 1.779%@100, Recall: 6.334%@20, 19.370%@100, NDCG: 5.158%@20, 9.676%@100, Time: 5.546s
Save model to checkpoints\LightGCN_BPRTrainer_LGCNDataset_5.158.pth
Epoch 264/1500, Loss: 0.032130, Time: 170.027s
Test result. Precision: 2.843%@20, 1.779%@100, Recall: 6.335%@20, 19.366%@100, NDCG: 5.158%@20, 9.675%@100, Time: 5.374s
Save model to checkpoints\LightGCN_BPRTrainer_LGCNDataset_5.158.pth
Epoch 265/1500, Loss: 0.032073, Time: 169.773s
Test result. Precision: 2.839%@20, 1.780%@100, Recall: 6.333%@20, 19.370%@100, NDCG: 5.156%@20, 9.676%@100, Time: 5.342s
Save model to checkpoints\LightGCN_BPRTrainer_LGCNDataset_5.156.pth
Epoch 266/1500, Loss: 0.031902, Time: 169.929s
Test result. Precision: 2.838%@20, 1.779%@100, Recall: 6.321%@20, 19.372%@100, NDCG: 5.158%@20, 9.681%@100, Time: 5.405s
Save model to checkpoints\LightGCN_BPRTrainer_LGCNDataset_5.158.pth
Epoch 267/1500, Loss: 0.031809, Time: 170.181s
Test result. Precision: 2.845%@20, 1.780%@100, Recall: 6.327%@20, 19.386%@100, NDCG: 5.160%@20, 9.683%@100, Time: 5.452s
Save model to checkpoints\LightGCN_BPRTrainer_LGCNDataset_5.160.pth
Epoch 268/1500, Loss: 0.031958, Time: 169.882s
Test result. Precision: 2.850%@20, 1.782%@100, Recall: 6.346%@20, 19.413%@100, NDCG: 5.168%@20, 9.692%@100, Time: 5.546s
Save model to checkpoints\LightGCN_BPRTrainer_LGCNDataset_5.168.pth
Epoch 269/1500, Loss: 0.031801, Time: 169.710s
Test result. Precision: 2.854%@20, 1.783%@100, Recall: 6.359%@20, 19.426%@100, NDCG: 5.176%@20, 9.699%@100, Time: 5.358s
Save model to checkpoints\LightGCN_BPRTrainer_LGCNDataset_5.176.pth
Epoch 270/1500, Loss: 0.031905, Time: 169.764s
Test result. Precision: 2.854%@20, 1.781%@100, Recall: 6.359%@20, 19.395%@100, NDCG: 5.179%@20, 9.692%@100, Time: 5.424s
Save model to checkpoints\LightGCN_BPRTrainer_LGCNDataset_5.179.pth
Epoch 271/1500, Loss: 0.031619, Time: 170.335s
Test result. Precision: 2.855%@20, 1.781%@100, Recall: 6.349%@20, 19.396%@100, NDCG: 5.167%@20, 9.682%@100, Time: 5.483s
Save model to checkpoints\LightGCN_BPRTrainer_LGCNDataset_5.167.pth
Epoch 272/1500, Loss: 0.031726, Time: 169.823s
Test result. Precision: 2.844%@20, 1.781%@100, Recall: 6.340%@20, 19.398%@100, NDCG: 5.168%@20, 9.691%@100, Time: 5.374s
Save model to checkpoints\LightGCN_BPRTrainer_LGCNDataset_5.168.pth
Epoch 273/1500, Loss: 0.031790, Time: 170.251s
Test result. Precision: 2.843%@20, 1.781%@100, Recall: 6.340%@20, 19.409%@100, NDCG: 5.167%@20, 9.694%@100, Time: 5.467s
Save model to checkpoints\LightGCN_BPRTrainer_LGCNDataset_5.167.pth
Epoch 274/1500, Loss: 0.031538, Time: 169.798s
Test result. Precision: 2.847%@20, 1.782%@100, Recall: 6.348%@20, 19.400%@100, NDCG: 5.173%@20, 9.695%@100, Time: 5.389s
Save model to checkpoints\LightGCN_BPRTrainer_LGCNDataset_5.173.pth
Epoch 275/1500, Loss: 0.031675, Time: 170.101s
Test result. Precision: 2.854%@20, 1.784%@100, Recall: 6.355%@20, 19.425%@100, NDCG: 5.181%@20, 9.708%@100, Time: 5.546s
Save model to checkpoints\LightGCN_BPRTrainer_LGCNDataset_5.181.pth
Epoch 276/1500, Loss: 0.031730, Time: 169.710s
Test result. Precision: 2.854%@20, 1.786%@100, Recall: 6.361%@20, 19.439%@100, NDCG: 5.174%@20, 9.706%@100, Time: 5.421s
Save model to checkpoints\LightGCN_BPRTrainer_LGCNDataset_5.174.pth
Epoch 277/1500, Loss: 0.031425, Time: 170.307s
Test result. Precision: 2.851%@20, 1.785%@100, Recall: 6.361%@20, 19.428%@100, NDCG: 5.176%@20, 9.707%@100, Time: 5.467s
Save model to checkpoints\LightGCN_BPRTrainer_LGCNDataset_5.176.pth
Epoch 278/1500, Loss: 0.031484, Time: 170.257s
Test result. Precision: 2.850%@20, 1.786%@100, Recall: 6.361%@20, 19.443%@100, NDCG: 5.179%@20, 9.714%@100, Time: 5.577s
Save model to checkpoints\LightGCN_BPRTrainer_LGCNDataset_5.179.pth
Epoch 279/1500, Loss: 0.031415, Time: 169.935s
Test result. Precision: 2.853%@20, 1.785%@100, Recall: 6.371%@20, 19.438%@100, NDCG: 5.182%@20, 9.711%@100, Time: 5.474s
Save model to checkpoints\LightGCN_BPRTrainer_LGCNDataset_5.182.pth
Epoch 280/1500, Loss: 0.031450, Time: 169.753s
Test result. Precision: 2.853%@20, 1.783%@100, Recall: 6.365%@20, 19.421%@100, NDCG: 5.175%@20, 9.699%@100, Time: 5.405s
Save model to checkpoints\LightGCN_BPRTrainer_LGCNDataset_5.175.pth
Epoch 281/1500, Loss: 0.031398, Time: 169.991s
Test result. Precision: 2.847%@20, 1.786%@100, Recall: 6.355%@20, 19.454%@100, NDCG: 5.175%@20, 9.714%@100, Time: 5.436s
Save model to checkpoints\LightGCN_BPRTrainer_LGCNDataset_5.175.pth
Epoch 282/1500, Loss: 0.030973, Time: 170.007s
Test result. Precision: 2.840%@20, 1.786%@100, Recall: 6.336%@20, 19.440%@100, NDCG: 5.166%@20, 9.710%@100, Time: 5.327s
Save model to checkpoints\LightGCN_BPRTrainer_LGCNDataset_5.166.pth
Epoch 283/1500, Loss: 0.031513, Time: 169.814s
Test result. Precision: 2.851%@20, 1.788%@100, Recall: 6.372%@20, 19.471%@100, NDCG: 5.181%@20, 9.720%@100, Time: 5.421s
Save model to checkpoints\LightGCN_BPRTrainer_LGCNDataset_5.181.pth
Epoch 284/1500, Loss: 0.031076, Time: 169.698s
Test result. Precision: 2.849%@20, 1.788%@100, Recall: 6.359%@20, 19.471%@100, NDCG: 5.180%@20, 9.723%@100, Time: 5.374s
Save model to checkpoints\LightGCN_BPRTrainer_LGCNDataset_5.180.pth
Epoch 285/1500, Loss: 0.031563, Time: 169.773s
Test result. Precision: 2.847%@20, 1.787%@100, Recall: 6.346%@20, 19.458%@100, NDCG: 5.173%@20, 9.716%@100, Time: 5.452s
Save model to checkpoints\LightGCN_BPRTrainer_LGCNDataset_5.173.pth
Epoch 286/1500, Loss: 0.031294, Time: 169.695s
Test result. Precision: 2.849%@20, 1.786%@100, Recall: 6.355%@20, 19.443%@100, NDCG: 5.179%@20, 9.715%@100, Time: 5.342s
Save model to checkpoints\LightGCN_BPRTrainer_LGCNDataset_5.179.pth
Epoch 287/1500, Loss: 0.031371, Time: 170.018s
Test result. Precision: 2.854%@20, 1.788%@100, Recall: 6.367%@20, 19.457%@100, NDCG: 5.195%@20, 9.730%@100, Time: 5.947s
Save model to checkpoints\LightGCN_BPRTrainer_LGCNDataset_5.195.pth
Epoch 288/1500, Loss: 0.030998, Time: 169.781s
Test result. Precision: 2.847%@20, 1.787%@100, Recall: 6.363%@20, 19.450%@100, NDCG: 5.186%@20, 9.724%@100, Time: 5.546s
Save model to checkpoints\LightGCN_BPRTrainer_LGCNDataset_5.186.pth
Epoch 289/1500, Loss: 0.031302, Time: 170.079s
Test result. Precision: 2.854%@20, 1.787%@100, Recall: 6.374%@20, 19.451%@100, NDCG: 5.196%@20, 9.727%@100, Time: 5.374s
Save model to checkpoints\LightGCN_BPRTrainer_LGCNDataset_5.196.pth
Epoch 290/1500, Loss: 0.030813, Time: 170.229s
Test result. Precision: 2.855%@20, 1.787%@100, Recall: 6.364%@20, 19.445%@100, NDCG: 5.185%@20, 9.719%@100, Time: 5.467s
Save model to checkpoints\LightGCN_BPRTrainer_LGCNDataset_5.185.pth
Epoch 291/1500, Loss: 0.030910, Time: 169.757s
Test result. Precision: 2.849%@20, 1.788%@100, Recall: 6.348%@20, 19.450%@100, NDCG: 5.178%@20, 9.721%@100, Time: 5.405s
Save model to checkpoints\LightGCN_BPRTrainer_LGCNDataset_5.178.pth
Epoch 292/1500, Loss: 0.030783, Time: 169.874s
Test result. Precision: 2.857%@20, 1.787%@100, Recall: 6.368%@20, 19.437%@100, NDCG: 5.184%@20, 9.714%@100, Time: 5.358s
Save model to checkpoints\LightGCN_BPRTrainer_LGCNDataset_5.184.pth
Epoch 293/1500, Loss: 0.030731, Time: 169.882s
Test result. Precision: 2.859%@20, 1.788%@100, Recall: 6.375%@20, 19.438%@100, NDCG: 5.187%@20, 9.715%@100, Time: 5.327s
Save model to checkpoints\LightGCN_BPRTrainer_LGCNDataset_5.187.pth
Epoch 294/1500, Loss: 0.030989, Time: 169.929s
Test result. Precision: 2.854%@20, 1.786%@100, Recall: 6.365%@20, 19.429%@100, NDCG: 5.179%@20, 9.711%@100, Time: 5.499s
Save model to checkpoints\LightGCN_BPRTrainer_LGCNDataset_5.179.pth
Epoch 295/1500, Loss: 0.030877, Time: 169.654s
Test result. Precision: 2.851%@20, 1.788%@100, Recall: 6.358%@20, 19.446%@100, NDCG: 5.176%@20, 9.715%@100, Time: 5.487s
Save model to checkpoints\LightGCN_BPRTrainer_LGCNDataset_5.176.pth
Epoch 296/1500, Loss: 0.030867, Time: 169.585s
Test result. Precision: 2.856%@20, 1.788%@100, Recall: 6.370%@20, 19.432%@100, NDCG: 5.189%@20, 9.719%@100, Time: 5.374s
Save model to checkpoints\LightGCN_BPRTrainer_LGCNDataset_5.189.pth
Epoch 297/1500, Loss: 0.030650, Time: 170.073s
Test result. Precision: 2.850%@20, 1.787%@100, Recall: 6.358%@20, 19.421%@100, NDCG: 5.190%@20, 9.723%@100, Time: 5.467s
Save model to checkpoints\LightGCN_BPRTrainer_LGCNDataset_5.190.pth
Epoch 298/1500, Loss: 0.030846, Time: 169.936s
Test result. Precision: 2.860%@20, 1.789%@100, Recall: 6.375%@20, 19.435%@100, NDCG: 5.199%@20, 9.728%@100, Time: 5.389s
Save model to checkpoints\LightGCN_BPRTrainer_LGCNDataset_5.199.pth
Epoch 299/1500, Loss: 0.030635, Time: 170.020s
Test result. Precision: 2.859%@20, 1.791%@100, Recall: 6.381%@20, 19.477%@100, NDCG: 5.199%@20, 9.740%@100, Time: 5.358s
Save model to checkpoints\LightGCN_BPRTrainer_LGCNDataset_5.199.pth
Epoch 300/1500, Loss: 0.030888, Time: 170.054s
Test result. Precision: 2.866%@20, 1.790%@100, Recall: 6.391%@20, 19.449%@100, NDCG: 5.206%@20, 9.732%@100, Time: 5.514s
Save model to checkpoints\LightGCN_BPRTrainer_LGCNDataset_5.206.pth
Epoch 301/1500, Loss: 0.030958, Time: 169.721s
Test result. Precision: 2.858%@20, 1.789%@100, Recall: 6.374%@20, 19.443%@100, NDCG: 5.209%@20, 9.741%@100, Time: 5.405s
Save model to checkpoints\LightGCN_BPRTrainer_LGCNDataset_5.209.pth
Epoch 302/1500, Loss: 0.030564, Time: 169.567s
Test result. Precision: 2.866%@20, 1.788%@100, Recall: 6.391%@20, 19.431%@100, NDCG: 5.209%@20, 9.729%@100, Time: 5.421s
Save model to checkpoints\LightGCN_BPRTrainer_LGCNDataset_5.209.pth
Epoch 303/1500, Loss: 0.030759, Time: 170.026s
Test result. Precision: 2.863%@20, 1.788%@100, Recall: 6.390%@20, 19.444%@100, NDCG: 5.207%@20, 9.732%@100, Time: 5.421s
Save model to checkpoints\LightGCN_BPRTrainer_LGCNDataset_5.207.pth
Epoch 304/1500, Loss: 0.030603, Time: 169.788s
Test result. Precision: 2.867%@20, 1.788%@100, Recall: 6.395%@20, 19.440%@100, NDCG: 5.212%@20, 9.734%@100, Time: 5.389s
Save model to checkpoints\LightGCN_BPRTrainer_LGCNDataset_5.212.pth
Epoch 305/1500, Loss: 0.030542, Time: 169.952s
Test result. Precision: 2.861%@20, 1.789%@100, Recall: 6.383%@20, 19.454%@100, NDCG: 5.210%@20, 9.741%@100, Time: 5.624s
Save model to checkpoints\LightGCN_BPRTrainer_LGCNDataset_5.210.pth
Epoch 306/1500, Loss: 0.030527, Time: 169.695s
Test result. Precision: 2.863%@20, 1.790%@100, Recall: 6.388%@20, 19.481%@100, NDCG: 5.209%@20, 9.745%@100, Time: 5.421s
Save model to checkpoints\LightGCN_BPRTrainer_LGCNDataset_5.209.pth
Epoch 307/1500, Loss: 0.030503, Time: 169.574s
Test result. Precision: 2.865%@20, 1.790%@100, Recall: 6.392%@20, 19.462%@100, NDCG: 5.209%@20, 9.738%@100, Time: 5.327s
Save model to checkpoints\LightGCN_BPRTrainer_LGCNDataset_5.209.pth
Epoch 308/1500, Loss: 0.030501, Time: 170.303s
Test result. Precision: 2.862%@20, 1.791%@100, Recall: 6.387%@20, 19.473%@100, NDCG: 5.202%@20, 9.737%@100, Time: 5.468s
Save model to checkpoints\LightGCN_BPRTrainer_LGCNDataset_5.202.pth
Epoch 309/1500, Loss: 0.030414, Time: 169.995s
Test result. Precision: 2.863%@20, 1.792%@100, Recall: 6.389%@20, 19.488%@100, NDCG: 5.199%@20, 9.739%@100, Time: 5.436s
Save model to checkpoints\LightGCN_BPRTrainer_LGCNDataset_5.199.pth
Epoch 310/1500, Loss: 0.030301, Time: 170.026s
Test result. Precision: 2.861%@20, 1.790%@100, Recall: 6.397%@20, 19.477%@100, NDCG: 5.200%@20, 9.733%@100, Time: 5.374s
Save model to checkpoints\LightGCN_BPRTrainer_LGCNDataset_5.200.pth
Epoch 311/1500, Loss: 0.030377, Time: 169.861s
Test result. Precision: 2.852%@20, 1.789%@100, Recall: 6.369%@20, 19.462%@100, NDCG: 5.183%@20, 9.724%@100, Time: 5.452s
Save model to checkpoints\LightGCN_BPRTrainer_LGCNDataset_5.183.pth
Epoch 312/1500, Loss: 0.030233, Time: 169.799s
Test result. Precision: 2.857%@20, 1.788%@100, Recall: 6.385%@20, 19.447%@100, NDCG: 5.191%@20, 9.723%@100, Time: 5.358s
Save model to checkpoints\LightGCN_BPRTrainer_LGCNDataset_5.191.pth
Epoch 313/1500, Loss: 0.030331, Time: 169.736s
Test result. Precision: 2.866%@20, 1.792%@100, Recall: 6.412%@20, 19.479%@100, NDCG: 5.211%@20, 9.743%@100, Time: 5.483s
Save model to checkpoints\LightGCN_BPRTrainer_LGCNDataset_5.211.pth
Epoch 314/1500, Loss: 0.030531, Time: 169.720s
Test result. Precision: 2.862%@20, 1.793%@100, Recall: 6.396%@20, 19.505%@100, NDCG: 5.205%@20, 9.751%@100, Time: 5.452s
Save model to checkpoints\LightGCN_BPRTrainer_LGCNDataset_5.205.pth
Epoch 315/1500, Loss: 0.030497, Time: 169.729s
Test result. Precision: 2.851%@20, 1.793%@100, Recall: 6.368%@20, 19.503%@100, NDCG: 5.190%@20, 9.748%@100, Time: 5.374s
Save model to checkpoints\LightGCN_BPRTrainer_LGCNDataset_5.190.pth
Epoch 316/1500, Loss: 0.030436, Time: 169.882s
Test result. Precision: 2.860%@20, 1.792%@100, Recall: 6.390%@20, 19.494%@100, NDCG: 5.208%@20, 9.753%@100, Time: 5.467s
Save model to checkpoints\LightGCN_BPRTrainer_LGCNDataset_5.208.pth
Epoch 317/1500, Loss: 0.030066, Time: 169.673s
Test result. Precision: 2.856%@20, 1.794%@100, Recall: 6.377%@20, 19.508%@100, NDCG: 5.204%@20, 9.761%@100, Time: 5.467s
Save model to checkpoints\LightGCN_BPRTrainer_LGCNDataset_5.204.pth
Epoch 318/1500, Loss: 0.030297, Time: 170.144s
Test result. Precision: 2.857%@20, 1.794%@100, Recall: 6.387%@20, 19.499%@100, NDCG: 5.209%@20, 9.760%@100, Time: 5.467s
Save model to checkpoints\LightGCN_BPRTrainer_LGCNDataset_5.209.pth
Epoch 319/1500, Loss: 0.030336, Time: 169.695s
Test result. Precision: 2.861%@20, 1.793%@100, Recall: 6.399%@20, 19.498%@100, NDCG: 5.218%@20, 9.763%@100, Time: 5.358s
Save model to checkpoints\LightGCN_BPRTrainer_LGCNDataset_5.218.pth
Epoch 320/1500, Loss: 0.030018, Time: 169.540s
Test result. Precision: 2.862%@20, 1.793%@100, Recall: 6.393%@20, 19.499%@100, NDCG: 5.219%@20, 9.766%@100, Time: 5.427s
Save model to checkpoints\LightGCN_BPRTrainer_LGCNDataset_5.219.pth
Epoch 321/1500, Loss: 0.030324, Time: 169.573s
Test result. Precision: 2.867%@20, 1.793%@100, Recall: 6.398%@20, 19.497%@100, NDCG: 5.222%@20, 9.765%@100, Time: 5.421s
Save model to checkpoints\LightGCN_BPRTrainer_LGCNDataset_5.222.pth
Epoch 322/1500, Loss: 0.030221, Time: 169.797s
Test result. Precision: 2.868%@20, 1.793%@100, Recall: 6.404%@20, 19.488%@100, NDCG: 5.227%@20, 9.766%@100, Time: 5.311s
Save model to checkpoints\LightGCN_BPRTrainer_LGCNDataset_5.227.pth
Epoch 323/1500, Loss: 0.030109, Time: 169.951s
Test result. Precision: 2.866%@20, 1.795%@100, Recall: 6.394%@20, 19.505%@100, NDCG: 5.222%@20, 9.771%@100, Time: 5.405s
Save model to checkpoints\LightGCN_BPRTrainer_LGCNDataset_5.222.pth
Epoch 324/1500, Loss: 0.030225, Time: 169.492s
Test result. Precision: 2.866%@20, 1.796%@100, Recall: 6.398%@20, 19.520%@100, NDCG: 5.229%@20, 9.780%@100, Time: 5.452s
Save model to checkpoints\LightGCN_BPRTrainer_LGCNDataset_5.229.pth
Epoch 325/1500, Loss: 0.029840, Time: 169.601s
Test result. Precision: 2.869%@20, 1.796%@100, Recall: 6.406%@20, 19.516%@100, NDCG: 5.230%@20, 9.779%@100, Time: 5.483s
Save model to checkpoints\LightGCN_BPRTrainer_LGCNDataset_5.230.pth
Epoch 326/1500, Loss: 0.030321, Time: 170.029s
Test result. Precision: 2.863%@20, 1.796%@100, Recall: 6.386%@20, 19.528%@100, NDCG: 5.219%@20, 9.778%@100, Time: 5.342s
Save model to checkpoints\LightGCN_BPRTrainer_LGCNDataset_5.219.pth
Epoch 327/1500, Loss: 0.030092, Time: 169.698s
Test result. Precision: 2.864%@20, 1.795%@100, Recall: 6.399%@20, 19.519%@100, NDCG: 5.221%@20, 9.774%@100, Time: 5.499s
Save model to checkpoints\LightGCN_BPRTrainer_LGCNDataset_5.221.pth
Epoch 328/1500, Loss: 0.029949, Time: 169.741s
Test result. Precision: 2.870%@20, 1.796%@100, Recall: 6.414%@20, 19.543%@100, NDCG: 5.227%@20, 9.779%@100, Time: 5.389s
Save model to checkpoints\LightGCN_BPRTrainer_LGCNDataset_5.227.pth
Epoch 329/1500, Loss: 0.029984, Time: 170.099s
Test result. Precision: 2.872%@20, 1.796%@100, Recall: 6.412%@20, 19.547%@100, NDCG: 5.231%@20, 9.784%@100, Time: 5.452s
Save model to checkpoints\LightGCN_BPRTrainer_LGCNDataset_5.231.pth
Epoch 330/1500, Loss: 0.029865, Time: 169.501s
Test result. Precision: 2.876%@20, 1.797%@100, Recall: 6.426%@20, 19.552%@100, NDCG: 5.235%@20, 9.785%@100, Time: 5.389s
Save model to checkpoints\LightGCN_BPRTrainer_LGCNDataset_5.235.pth
Epoch 331/1500, Loss: 0.029842, Time: 169.710s
Test result. Precision: 2.875%@20, 1.796%@100, Recall: 6.419%@20, 19.533%@100, NDCG: 5.228%@20, 9.774%@100, Time: 5.421s
Save model to checkpoints\LightGCN_BPRTrainer_LGCNDataset_5.228.pth
Epoch 332/1500, Loss: 0.030067, Time: 169.601s
Test result. Precision: 2.865%@20, 1.797%@100, Recall: 6.406%@20, 19.548%@100, NDCG: 5.221%@20, 9.782%@100, Time: 5.405s
Save model to checkpoints\LightGCN_BPRTrainer_LGCNDataset_5.221.pth
Epoch 333/1500, Loss: 0.029926, Time: 169.642s
Test result. Precision: 2.872%@20, 1.799%@100, Recall: 6.420%@20, 19.568%@100, NDCG: 5.231%@20, 9.792%@100, Time: 5.374s
Save model to checkpoints\LightGCN_BPRTrainer_LGCNDataset_5.231.pth
Epoch 334/1500, Loss: 0.029915, Time: 169.741s
Test result. Precision: 2.868%@20, 1.797%@100, Recall: 6.402%@20, 19.551%@100, NDCG: 5.227%@20, 9.788%@100, Time: 5.374s
Save model to checkpoints\LightGCN_BPRTrainer_LGCNDataset_5.227.pth
Epoch 335/1500, Loss: 0.029770, Time: 169.760s
Test result. Precision: 2.869%@20, 1.797%@100, Recall: 6.398%@20, 19.548%@100, NDCG: 5.232%@20, 9.793%@100, Time: 5.483s
Save model to checkpoints\LightGCN_BPRTrainer_LGCNDataset_5.232.pth
Epoch 336/1500, Loss: 0.029845, Time: 169.564s
Test result. Precision: 2.868%@20, 1.799%@100, Recall: 6.409%@20, 19.561%@100, NDCG: 5.230%@20, 9.796%@100, Time: 5.421s
Save model to checkpoints\LightGCN_BPRTrainer_LGCNDataset_5.230.pth
Epoch 337/1500, Loss: 0.029899, Time: 169.741s
Test result. Precision: 2.876%@20, 1.800%@100, Recall: 6.425%@20, 19.579%@100, NDCG: 5.250%@20, 9.812%@100, Time: 5.421s
Save model to checkpoints\LightGCN_BPRTrainer_LGCNDataset_5.250.pth
Epoch 338/1500, Loss: 0.029786, Time: 169.745s
Test result. Precision: 2.872%@20, 1.800%@100, Recall: 6.411%@20, 19.567%@100, NDCG: 5.243%@20, 9.809%@100, Time: 5.405s
Save model to checkpoints\LightGCN_BPRTrainer_LGCNDataset_5.243.pth
Epoch 339/1500, Loss: 0.029549, Time: 169.776s
Test result. Precision: 2.884%@20, 1.798%@100, Recall: 6.442%@20, 19.556%@100, NDCG: 5.257%@20, 9.806%@100, Time: 5.436s
Save model to checkpoints\LightGCN_BPRTrainer_LGCNDataset_5.257.pth
Epoch 340/1500, Loss: 0.029686, Time: 169.835s
Test result. Precision: 2.879%@20, 1.799%@100, Recall: 6.419%@20, 19.549%@100, NDCG: 5.249%@20, 9.806%@100, Time: 5.436s
Save model to checkpoints\LightGCN_BPRTrainer_LGCNDataset_5.249.pth
Epoch 341/1500, Loss: 0.029659, Time: 169.413s
Test result. Precision: 2.884%@20, 1.802%@100, Recall: 6.430%@20, 19.594%@100, NDCG: 5.256%@20, 9.820%@100, Time: 5.405s
Save model to checkpoints\LightGCN_BPRTrainer_LGCNDataset_5.256.pth
Epoch 342/1500, Loss: 0.029922, Time: 169.657s
Test result. Precision: 2.884%@20, 1.800%@100, Recall: 6.428%@20, 19.559%@100, NDCG: 5.254%@20, 9.810%@100, Time: 5.421s
Save model to checkpoints\LightGCN_BPRTrainer_LGCNDataset_5.254.pth
Epoch 343/1500, Loss: 0.029464, Time: 169.722s
Test result. Precision: 2.872%@20, 1.798%@100, Recall: 6.409%@20, 19.546%@100, NDCG: 5.242%@20, 9.801%@100, Time: 5.342s
Save model to checkpoints\LightGCN_BPRTrainer_LGCNDataset_5.242.pth
Epoch 344/1500, Loss: 0.029631, Time: 170.007s
Test result. Precision: 2.879%@20, 1.799%@100, Recall: 6.421%@20, 19.563%@100, NDCG: 5.255%@20, 9.815%@100, Time: 5.671s
Save model to checkpoints\LightGCN_BPRTrainer_LGCNDataset_5.255.pth
Epoch 345/1500, Loss: 0.029672, Time: 169.991s
Test result. Precision: 2.886%@20, 1.801%@100, Recall: 6.441%@20, 19.591%@100, NDCG: 5.265%@20, 9.825%@100, Time: 5.439s
Save model to checkpoints\LightGCN_BPRTrainer_LGCNDataset_5.265.pth
Epoch 346/1500, Loss: 0.029529, Time: 170.011s
Test result. Precision: 2.885%@20, 1.801%@100, Recall: 6.438%@20, 19.604%@100, NDCG: 5.262%@20, 9.825%@100, Time: 5.483s
Save model to checkpoints\LightGCN_BPRTrainer_LGCNDataset_5.262.pth
Epoch 347/1500, Loss: 0.029742, Time: 169.929s
Test result. Precision: 2.880%@20, 1.798%@100, Recall: 6.423%@20, 19.574%@100, NDCG: 5.250%@20, 9.810%@100, Time: 5.483s
Save model to checkpoints\LightGCN_BPRTrainer_LGCNDataset_5.250.pth
Epoch 348/1500, Loss: 0.029553, Time: 169.611s
Test result. Precision: 2.879%@20, 1.797%@100, Recall: 6.424%@20, 19.557%@100, NDCG: 5.246%@20, 9.801%@100, Time: 5.421s
Save model to checkpoints\LightGCN_BPRTrainer_LGCNDataset_5.246.pth
Epoch 349/1500, Loss: 0.029431, Time: 169.979s
Test result. Precision: 2.890%@20, 1.798%@100, Recall: 6.445%@20, 19.577%@100, NDCG: 5.256%@20, 9.806%@100, Time: 5.499s
Save model to checkpoints\LightGCN_BPRTrainer_LGCNDataset_5.256.pth
Epoch 350/1500, Loss: 0.029406, Time: 169.719s
Test result. Precision: 2.888%@20, 1.800%@100, Recall: 6.438%@20, 19.587%@100, NDCG: 5.253%@20, 9.809%@100, Time: 5.530s
Save model to checkpoints\LightGCN_BPRTrainer_LGCNDataset_5.253.pth
Epoch 351/1500, Loss: 0.029421, Time: 170.029s
Test result. Precision: 2.884%@20, 1.801%@100, Recall: 6.430%@20, 19.603%@100, NDCG: 5.253%@20, 9.818%@100, Time: 5.405s
Save model to checkpoints\LightGCN_BPRTrainer_LGCNDataset_5.253.pth
Epoch 352/1500, Loss: 0.029514, Time: 170.303s
Test result. Precision: 2.887%@20, 1.802%@100, Recall: 6.437%@20, 19.614%@100, NDCG: 5.257%@20, 9.824%@100, Time: 5.452s
Save model to checkpoints\LightGCN_BPRTrainer_LGCNDataset_5.257.pth
Epoch 353/1500, Loss: 0.029363, Time: 169.757s
Test result. Precision: 2.899%@20, 1.804%@100, Recall: 6.463%@20, 19.629%@100, NDCG: 5.273%@20, 9.835%@100, Time: 5.452s
Save model to checkpoints\LightGCN_BPRTrainer_LGCNDataset_5.273.pth
Epoch 354/1500, Loss: 0.029256, Time: 169.835s
Test result. Precision: 2.891%@20, 1.800%@100, Recall: 6.455%@20, 19.586%@100, NDCG: 5.265%@20, 9.818%@100, Time: 5.374s
Save model to checkpoints\LightGCN_BPRTrainer_LGCNDataset_5.265.pth
Epoch 355/1500, Loss: 0.029365, Time: 169.970s
Test result. Precision: 2.893%@20, 1.802%@100, Recall: 6.458%@20, 19.602%@100, NDCG: 5.268%@20, 9.825%@100, Time: 5.327s
Save model to checkpoints\LightGCN_BPRTrainer_LGCNDataset_5.268.pth
Epoch 356/1500, Loss: 0.029468, Time: 169.741s
Test result. Precision: 2.894%@20, 1.802%@100, Recall: 6.464%@20, 19.608%@100, NDCG: 5.273%@20, 9.830%@100, Time: 5.358s
Save model to checkpoints\LightGCN_BPRTrainer_LGCNDataset_5.273.pth
Epoch 357/1500, Loss: 0.029343, Time: 170.054s
Test result. Precision: 2.891%@20, 1.804%@100, Recall: 6.444%@20, 19.609%@100, NDCG: 5.272%@20, 9.837%@100, Time: 5.514s
Save model to checkpoints\LightGCN_BPRTrainer_LGCNDataset_5.272.pth
Epoch 358/1500, Loss: 0.029570, Time: 169.893s
Test result. Precision: 2.893%@20, 1.804%@100, Recall: 6.451%@20, 19.620%@100, NDCG: 5.271%@20, 9.838%@100, Time: 5.405s
Save model to checkpoints\LightGCN_BPRTrainer_LGCNDataset_5.271.pth
Epoch 359/1500, Loss: 0.029253, Time: 169.997s
Test result. Precision: 2.890%@20, 1.805%@100, Recall: 6.445%@20, 19.628%@100, NDCG: 5.265%@20, 9.838%@100, Time: 5.436s
Save model to checkpoints\LightGCN_BPRTrainer_LGCNDataset_5.265.pth
Epoch 360/1500, Loss: 0.029194, Time: 170.116s
Test result. Precision: 2.891%@20, 1.804%@100, Recall: 6.452%@20, 19.622%@100, NDCG: 5.275%@20, 9.842%@100, Time: 5.467s
Save model to checkpoints\LightGCN_BPRTrainer_LGCNDataset_5.275.pth
Epoch 361/1500, Loss: 0.029048, Time: 169.614s
Test result. Precision: 2.893%@20, 1.804%@100, Recall: 6.455%@20, 19.631%@100, NDCG: 5.275%@20, 9.842%@100, Time: 5.421s
Save model to checkpoints\LightGCN_BPRTrainer_LGCNDataset_5.275.pth
Epoch 362/1500, Loss: 0.029231, Time: 170.054s
Test result. Precision: 2.895%@20, 1.805%@100, Recall: 6.462%@20, 19.630%@100, NDCG: 5.279%@20, 9.846%@100, Time: 5.499s
Save model to checkpoints\LightGCN_BPRTrainer_LGCNDataset_5.279.pth
Epoch 363/1500, Loss: 0.029140, Time: 169.924s
Test result. Precision: 2.893%@20, 1.804%@100, Recall: 6.448%@20, 19.632%@100, NDCG: 5.279%@20, 9.849%@100, Time: 5.389s
Save model to checkpoints\LightGCN_BPRTrainer_LGCNDataset_5.279.pth
Epoch 364/1500, Loss: 0.029086, Time: 169.971s
Test result. Precision: 2.894%@20, 1.806%@100, Recall: 6.447%@20, 19.654%@100, NDCG: 5.272%@20, 9.849%@100, Time: 5.499s
Save model to checkpoints\LightGCN_BPRTrainer_LGCNDataset_5.272.pth
Epoch 365/1500, Loss: 0.029128, Time: 169.757s
Test result. Precision: 2.896%@20, 1.801%@100, Recall: 6.468%@20, 19.600%@100, NDCG: 5.280%@20, 9.834%@100, Time: 5.342s
Save model to checkpoints\LightGCN_BPRTrainer_LGCNDataset_5.280.pth
Epoch 366/1500, Loss: 0.029262, Time: 169.699s
Test result. Precision: 2.894%@20, 1.802%@100, Recall: 6.460%@20, 19.602%@100, NDCG: 5.276%@20, 9.834%@100, Time: 5.405s
Save model to checkpoints\LightGCN_BPRTrainer_LGCNDataset_5.276.pth
Epoch 367/1500, Loss: 0.029206, Time: 169.835s
Test result. Precision: 2.892%@20, 1.804%@100, Recall: 6.453%@20, 19.634%@100, NDCG: 5.275%@20, 9.843%@100, Time: 5.421s
Save model to checkpoints\LightGCN_BPRTrainer_LGCNDataset_5.275.pth
Epoch 368/1500, Loss: 0.028994, Time: 169.820s
Test result. Precision: 2.890%@20, 1.804%@100, Recall: 6.441%@20, 19.633%@100, NDCG: 5.269%@20, 9.841%@100, Time: 5.483s
Save model to checkpoints\LightGCN_BPRTrainer_LGCNDataset_5.269.pth
Epoch 369/1500, Loss: 0.029038, Time: 170.038s
Test result. Precision: 2.885%@20, 1.804%@100, Recall: 6.424%@20, 19.632%@100, NDCG: 5.263%@20, 9.841%@100, Time: 5.421s
Save model to checkpoints\LightGCN_BPRTrainer_LGCNDataset_5.263.pth
Epoch 370/1500, Loss: 0.029140, Time: 169.885s
Test result. Precision: 2.890%@20, 1.805%@100, Recall: 6.433%@20, 19.648%@100, NDCG: 5.271%@20, 9.849%@100, Time: 5.389s
Save model to checkpoints\LightGCN_BPRTrainer_LGCNDataset_5.271.pth
Epoch 371/1500, Loss: 0.029256, Time: 169.882s
Test result. Precision: 2.881%@20, 1.804%@100, Recall: 6.420%@20, 19.626%@100, NDCG: 5.260%@20, 9.839%@100, Time: 5.327s
Save model to checkpoints\LightGCN_BPRTrainer_LGCNDataset_5.260.pth
Epoch 372/1500, Loss: 0.029326, Time: 169.929s
Test result. Precision: 2.885%@20, 1.806%@100, Recall: 6.434%@20, 19.643%@100, NDCG: 5.267%@20, 9.849%@100, Time: 5.327s
Save model to checkpoints\LightGCN_BPRTrainer_LGCNDataset_5.267.pth
Epoch 373/1500, Loss: 0.029029, Time: 169.814s
Test result. Precision: 2.893%@20, 1.808%@100, Recall: 6.453%@20, 19.659%@100, NDCG: 5.274%@20, 9.853%@100, Time: 5.467s
Save model to checkpoints\LightGCN_BPRTrainer_LGCNDataset_5.274.pth
Epoch 374/1500, Loss: 0.028743, Time: 169.862s
Test result. Precision: 2.888%@20, 1.806%@100, Recall: 6.438%@20, 19.639%@100, NDCG: 5.259%@20, 9.837%@100, Time: 5.389s
Save model to checkpoints\LightGCN_BPRTrainer_LGCNDataset_5.259.pth
Epoch 375/1500, Loss: 0.029112, Time: 170.023s
Test result. Precision: 2.902%@20, 1.804%@100, Recall: 6.468%@20, 19.616%@100, NDCG: 5.276%@20, 9.832%@100, Time: 5.572s
Save model to checkpoints\LightGCN_BPRTrainer_LGCNDataset_5.276.pth
Epoch 376/1500, Loss: 0.028885, Time: 169.846s
Test result. Precision: 2.899%@20, 1.805%@100, Recall: 6.457%@20, 19.619%@100, NDCG: 5.273%@20, 9.834%@100, Time: 5.483s
Save model to checkpoints\LightGCN_BPRTrainer_LGCNDataset_5.273.pth
Epoch 377/1500, Loss: 0.028947, Time: 169.751s
Test result. Precision: 2.900%@20, 1.808%@100, Recall: 6.460%@20, 19.654%@100, NDCG: 5.275%@20, 9.848%@100, Time: 5.483s
Save model to checkpoints\LightGCN_BPRTrainer_LGCNDataset_5.275.pth
Epoch 378/1500, Loss: 0.028855, Time: 169.849s
Test result. Precision: 2.902%@20, 1.807%@100, Recall: 6.459%@20, 19.652%@100, NDCG: 5.280%@20, 9.851%@100, Time: 5.358s
Save model to checkpoints\LightGCN_BPRTrainer_LGCNDataset_5.280.pth
Epoch 379/1500, Loss: 0.028890, Time: 169.889s
Test result. Precision: 2.901%@20, 1.808%@100, Recall: 6.460%@20, 19.678%@100, NDCG: 5.282%@20, 9.859%@100, Time: 5.455s
Save model to checkpoints\LightGCN_BPRTrainer_LGCNDataset_5.282.pth
Epoch 380/1500, Loss: 0.028969, Time: 170.166s
Test result. Precision: 2.892%@20, 1.807%@100, Recall: 6.447%@20, 19.662%@100, NDCG: 5.269%@20, 9.848%@100, Time: 5.452s
Save model to checkpoints\LightGCN_BPRTrainer_LGCNDataset_5.269.pth
Epoch 381/1500, Loss: 0.028799, Time: 169.574s
Test result. Precision: 2.892%@20, 1.806%@100, Recall: 6.456%@20, 19.651%@100, NDCG: 5.275%@20, 9.849%@100, Time: 5.405s
Save model to checkpoints\LightGCN_BPRTrainer_LGCNDataset_5.275.pth
Epoch 382/1500, Loss: 0.029026, Time: 169.913s
Test result. Precision: 2.895%@20, 1.806%@100, Recall: 6.455%@20, 19.650%@100, NDCG: 5.276%@20, 9.848%@100, Time: 5.436s
Save model to checkpoints\LightGCN_BPRTrainer_LGCNDataset_5.276.pth
Epoch 383/1500, Loss: 0.028858, Time: 169.960s
Test result. Precision: 2.899%@20, 1.806%@100, Recall: 6.465%@20, 19.647%@100, NDCG: 5.279%@20, 9.845%@100, Time: 5.436s
Save model to checkpoints\LightGCN_BPRTrainer_LGCNDataset_5.279.pth
Epoch 384/1500, Loss: 0.028795, Time: 169.632s
Test result. Precision: 2.901%@20, 1.806%@100, Recall: 6.470%@20, 19.640%@100, NDCG: 5.280%@20, 9.843%@100, Time: 5.452s
Save model to checkpoints\LightGCN_BPRTrainer_LGCNDataset_5.280.pth
Epoch 385/1500, Loss: 0.028896, Time: 169.982s
Test result. Precision: 2.900%@20, 1.806%@100, Recall: 6.471%@20, 19.645%@100, NDCG: 5.281%@20, 9.846%@100, Time: 5.358s
Save model to checkpoints\LightGCN_BPRTrainer_LGCNDataset_5.281.pth
Epoch 386/1500, Loss: 0.028823, Time: 169.860s
Test result. Precision: 2.898%@20, 1.807%@100, Recall: 6.463%@20, 19.661%@100, NDCG: 5.279%@20, 9.851%@100, Time: 5.405s
Save model to checkpoints\LightGCN_BPRTrainer_LGCNDataset_5.279.pth
Epoch 387/1500, Loss: 0.028611, Time: 170.007s
Test result. Precision: 2.895%@20, 1.807%@100, Recall: 6.458%@20, 19.655%@100, NDCG: 5.277%@20, 9.850%@100, Time: 5.389s
Save model to checkpoints\LightGCN_BPRTrainer_LGCNDataset_5.277.pth
Epoch 388/1500, Loss: 0.028731, Time: 170.101s
Test result. Precision: 2.896%@20, 1.805%@100, Recall: 6.456%@20, 19.646%@100, NDCG: 5.279%@20, 9.847%@100, Time: 5.514s
Save model to checkpoints\LightGCN_BPRTrainer_LGCNDataset_5.279.pth
Epoch 389/1500, Loss: 0.028949, Time: 169.948s
Test result. Precision: 2.904%@20, 1.805%@100, Recall: 6.464%@20, 19.635%@100, NDCG: 5.288%@20, 9.850%@100, Time: 5.452s
Save model to checkpoints\LightGCN_BPRTrainer_LGCNDataset_5.288.pth
Epoch 390/1500, Loss: 0.028796, Time: 169.829s
Test result. Precision: 2.900%@20, 1.807%@100, Recall: 6.467%@20, 19.649%@100, NDCG: 5.285%@20, 9.854%@100, Time: 5.421s
Save model to checkpoints\LightGCN_BPRTrainer_LGCNDataset_5.285.pth
Epoch 391/1500, Loss: 0.028581, Time: 169.789s
Test result. Precision: 2.898%@20, 1.805%@100, Recall: 6.457%@20, 19.626%@100, NDCG: 5.284%@20, 9.850%@100, Time: 5.311s
Save model to checkpoints\LightGCN_BPRTrainer_LGCNDataset_5.284.pth
Epoch 392/1500, Loss: 0.028824, Time: 169.773s
Test result. Precision: 2.908%@20, 1.806%@100, Recall: 6.477%@20, 19.625%@100, NDCG: 5.295%@20, 9.851%@100, Time: 5.374s
Save model to checkpoints\LightGCN_BPRTrainer_LGCNDataset_5.295.pth
Epoch 393/1500, Loss: 0.028616, Time: 170.069s
Test result. Precision: 2.905%@20, 1.806%@100, Recall: 6.473%@20, 19.631%@100, NDCG: 5.287%@20, 9.847%@100, Time: 5.342s
Save model to checkpoints\LightGCN_BPRTrainer_LGCNDataset_5.287.pth
Epoch 394/1500, Loss: 0.028984, Time: 169.710s
Test result. Precision: 2.901%@20, 1.806%@100, Recall: 6.463%@20, 19.639%@100, NDCG: 5.280%@20, 9.846%@100, Time: 5.452s
Save model to checkpoints\LightGCN_BPRTrainer_LGCNDataset_5.280.pth
Epoch 395/1500, Loss: 0.028629, Time: 169.705s
Test result. Precision: 2.906%@20, 1.806%@100, Recall: 6.478%@20, 19.634%@100, NDCG: 5.287%@20, 9.844%@100, Time: 5.389s
Save model to checkpoints\LightGCN_BPRTrainer_LGCNDataset_5.287.pth
Epoch 396/1500, Loss: 0.028793, Time: 170.022s
Test result. Precision: 2.893%@20, 1.804%@100, Recall: 6.445%@20, 19.610%@100, NDCG: 5.265%@20, 9.827%@100, Time: 5.561s
Save model to checkpoints\LightGCN_BPRTrainer_LGCNDataset_5.265.pth
Epoch 397/1500, Loss: 0.028663, Time: 169.695s
Test result. Precision: 2.896%@20, 1.805%@100, Recall: 6.456%@20, 19.619%@100, NDCG: 5.273%@20, 9.834%@100, Time: 5.483s
Save model to checkpoints\LightGCN_BPRTrainer_LGCNDataset_5.273.pth
Epoch 398/1500, Loss: 0.028584, Time: 170.204s
Test result. Precision: 2.906%@20, 1.805%@100, Recall: 6.481%@20, 19.624%@100, NDCG: 5.290%@20, 9.841%@100, Time: 5.514s
Save model to checkpoints\LightGCN_BPRTrainer_LGCNDataset_5.290.pth
Epoch 399/1500, Loss: 0.028648, Time: 169.939s
Test result. Precision: 2.905%@20, 1.806%@100, Recall: 6.476%@20, 19.644%@100, NDCG: 5.291%@20, 9.851%@100, Time: 5.452s
Save model to checkpoints\LightGCN_BPRTrainer_LGCNDataset_5.291.pth
Epoch 400/1500, Loss: 0.028412, Time: 170.608s
Test result. Precision: 2.906%@20, 1.808%@100, Recall: 6.472%@20, 19.631%@100, NDCG: 5.296%@20, 9.855%@100, Time: 5.421s
Save model to checkpoints\LightGCN_BPRTrainer_LGCNDataset_5.296.pth
Epoch 401/1500, Loss: 0.028530, Time: 170.085s
Test result. Precision: 2.902%@20, 1.807%@100, Recall: 6.458%@20, 19.629%@100, NDCG: 5.284%@20, 9.847%@100, Time: 5.408s
Save model to checkpoints\LightGCN_BPRTrainer_LGCNDataset_5.284.pth
Epoch 402/1500, Loss: 0.028387, Time: 169.727s
Test result. Precision: 2.905%@20, 1.809%@100, Recall: 6.465%@20, 19.650%@100, NDCG: 5.284%@20, 9.851%@100, Time: 5.389s
Save model to checkpoints\LightGCN_BPRTrainer_LGCNDataset_5.284.pth
Epoch 403/1500, Loss: 0.028511, Time: 169.663s
Test result. Precision: 2.897%@20, 1.809%@100, Recall: 6.460%@20, 19.664%@100, NDCG: 5.287%@20, 9.863%@100, Time: 5.374s
Save model to checkpoints\LightGCN_BPRTrainer_LGCNDataset_5.287.pth
Epoch 404/1500, Loss: 0.028324, Time: 169.881s
Test result. Precision: 2.895%@20, 1.807%@100, Recall: 6.454%@20, 19.638%@100, NDCG: 5.283%@20, 9.853%@100, Time: 5.436s
Save model to checkpoints\LightGCN_BPRTrainer_LGCNDataset_5.283.pth
Epoch 405/1500, Loss: 0.028455, Time: 169.570s
Test result. Precision: 2.898%@20, 1.808%@100, Recall: 6.458%@20, 19.636%@100, NDCG: 5.288%@20, 9.855%@100, Time: 5.483s
Save model to checkpoints\LightGCN_BPRTrainer_LGCNDataset_5.288.pth
Epoch 406/1500, Loss: 0.028280, Time: 169.726s
Test result. Precision: 2.893%@20, 1.804%@100, Recall: 6.451%@20, 19.616%@100, NDCG: 5.282%@20, 9.846%@100, Time: 5.514s
Save model to checkpoints\LightGCN_BPRTrainer_LGCNDataset_5.282.pth
Epoch 407/1500, Loss: 0.028528, Time: 169.515s
Test result. Precision: 2.899%@20, 1.810%@100, Recall: 6.464%@20, 19.658%@100, NDCG: 5.290%@20, 9.864%@100, Time: 5.358s
Save model to checkpoints\LightGCN_BPRTrainer_LGCNDataset_5.290.pth
Epoch 408/1500, Loss: 0.028418, Time: 170.048s
Test result. Precision: 2.902%@20, 1.811%@100, Recall: 6.469%@20, 19.674%@100, NDCG: 5.290%@20, 9.866%@100, Time: 5.561s
Save model to checkpoints\LightGCN_BPRTrainer_LGCNDataset_5.290.pth
Epoch 409/1500, Loss: 0.028441, Time: 169.752s
Test result. Precision: 2.904%@20, 1.811%@100, Recall: 6.471%@20, 19.685%@100, NDCG: 5.296%@20, 9.875%@100, Time: 5.436s
Save model to checkpoints\LightGCN_BPRTrainer_LGCNDataset_5.296.pth
Epoch 410/1500, Loss: 0.028327, Time: 169.829s
Test result. Precision: 2.902%@20, 1.811%@100, Recall: 6.460%@20, 19.659%@100, NDCG: 5.290%@20, 9.865%@100, Time: 5.514s
Save model to checkpoints\LightGCN_BPRTrainer_LGCNDataset_5.290.pth
Epoch 411/1500, Loss: 0.028431, Time: 169.762s
Test result. Precision: 2.900%@20, 1.810%@100, Recall: 6.454%@20, 19.658%@100, NDCG: 5.294%@20, 9.871%@100, Time: 5.499s
Save model to checkpoints\LightGCN_BPRTrainer_LGCNDataset_5.294.pth
Epoch 412/1500, Loss: 0.028493, Time: 169.889s
Test result. Precision: 2.902%@20, 1.812%@100, Recall: 6.455%@20, 19.671%@100, NDCG: 5.298%@20, 9.878%@100, Time: 5.530s
Save model to checkpoints\LightGCN_BPRTrainer_LGCNDataset_5.298.pth
Epoch 413/1500, Loss: 0.028457, Time: 169.523s
Test result. Precision: 2.893%@20, 1.812%@100, Recall: 6.442%@20, 19.675%@100, NDCG: 5.288%@20, 9.876%@100, Time: 5.358s
Save model to checkpoints\LightGCN_BPRTrainer_LGCNDataset_5.288.pth
Epoch 414/1500, Loss: 0.028403, Time: 169.700s
Test result. Precision: 2.897%@20, 1.812%@100, Recall: 6.469%@20, 19.659%@100, NDCG: 5.294%@20, 9.870%@100, Time: 5.436s
Save model to checkpoints\LightGCN_BPRTrainer_LGCNDataset_5.294.pth
Epoch 415/1500, Loss: 0.028486, Time: 169.835s
Test result. Precision: 2.897%@20, 1.812%@100, Recall: 6.456%@20, 19.664%@100, NDCG: 5.289%@20, 9.870%@100, Time: 5.467s
Save model to checkpoints\LightGCN_BPRTrainer_LGCNDataset_5.289.pth
Epoch 416/1500, Loss: 0.028387, Time: 169.773s
Test result. Precision: 2.894%@20, 1.812%@100, Recall: 6.447%@20, 19.669%@100, NDCG: 5.287%@20, 9.874%@100, Time: 5.389s
Save model to checkpoints\LightGCN_BPRTrainer_LGCNDataset_5.287.pth
Epoch 417/1500, Loss: 0.028107, Time: 169.693s
Test result. Precision: 2.901%@20, 1.811%@100, Recall: 6.460%@20, 19.659%@100, NDCG: 5.287%@20, 9.861%@100, Time: 5.483s
Save model to checkpoints\LightGCN_BPRTrainer_LGCNDataset_5.287.pth
Epoch 418/1500, Loss: 0.028533, Time: 169.757s
Test result. Precision: 2.905%@20, 1.809%@100, Recall: 6.472%@20, 19.636%@100, NDCG: 5.297%@20, 9.860%@100, Time: 5.342s
Save model to checkpoints\LightGCN_BPRTrainer_LGCNDataset_5.297.pth
Epoch 419/1500, Loss: 0.028397, Time: 169.898s
Test result. Precision: 2.909%@20, 1.810%@100, Recall: 6.478%@20, 19.652%@100, NDCG: 5.299%@20, 9.865%@100, Time: 5.342s
Save model to checkpoints\LightGCN_BPRTrainer_LGCNDataset_5.299.pth
Epoch 420/1500, Loss: 0.028398, Time: 169.657s
Test result. Precision: 2.908%@20, 1.811%@100, Recall: 6.478%@20, 19.665%@100, NDCG: 5.301%@20, 9.872%@100, Time: 5.514s
Save model to checkpoints\LightGCN_BPRTrainer_LGCNDataset_5.301.pth
Epoch 421/1500, Loss: 0.028600, Time: 170.002s
Test result. Precision: 2.908%@20, 1.812%@100, Recall: 6.473%@20, 19.674%@100, NDCG: 5.299%@20, 9.875%@100, Time: 5.452s
Save model to checkpoints\LightGCN_BPRTrainer_LGCNDataset_5.299.pth
Epoch 422/1500, Loss: 0.028002, Time: 169.898s
Test result. Precision: 2.909%@20, 1.813%@100, Recall: 6.471%@20, 19.703%@100, NDCG: 5.294%@20, 9.877%@100, Time: 5.374s
Save model to checkpoints\LightGCN_BPRTrainer_LGCNDataset_5.294.pth
Epoch 423/1500, Loss: 0.028472, Time: 169.628s
Test result. Precision: 2.910%@20, 1.812%@100, Recall: 6.478%@20, 19.679%@100, NDCG: 5.297%@20, 9.872%@100, Time: 5.342s
Save model to checkpoints\LightGCN_BPRTrainer_LGCNDataset_5.297.pth
Epoch 424/1500, Loss: 0.028241, Time: 169.892s
Test result. Precision: 2.909%@20, 1.814%@100, Recall: 6.482%@20, 19.682%@100, NDCG: 5.304%@20, 9.882%@100, Time: 5.467s
Save model to checkpoints\LightGCN_BPRTrainer_LGCNDataset_5.304.pth
Epoch 425/1500, Loss: 0.028336, Time: 169.585s
Test result. Precision: 2.911%@20, 1.812%@100, Recall: 6.488%@20, 19.684%@100, NDCG: 5.308%@20, 9.881%@100, Time: 5.405s
Save model to checkpoints\LightGCN_BPRTrainer_LGCNDataset_5.308.pth
Epoch 426/1500, Loss: 0.028319, Time: 169.578s
Test result. Precision: 2.910%@20, 1.810%@100, Recall: 6.484%@20, 19.668%@100, NDCG: 5.302%@20, 9.871%@100, Time: 5.389s
Save model to checkpoints\LightGCN_BPRTrainer_LGCNDataset_5.302.pth
Epoch 427/1500, Loss: 0.028671, Time: 169.790s
Test result. Precision: 2.910%@20, 1.812%@100, Recall: 6.491%@20, 19.680%@100, NDCG: 5.302%@20, 9.873%@100, Time: 5.436s
Save model to checkpoints\LightGCN_BPRTrainer_LGCNDataset_5.302.pth
Epoch 428/1500, Loss: 0.028460, Time: 169.866s
Test result. Precision: 2.910%@20, 1.810%@100, Recall: 6.488%@20, 19.666%@100, NDCG: 5.302%@20, 9.871%@100, Time: 5.452s
Save model to checkpoints\LightGCN_BPRTrainer_LGCNDataset_5.302.pth
Epoch 429/1500, Loss: 0.028026, Time: 169.448s
Test result. Precision: 2.908%@20, 1.809%@100, Recall: 6.482%@20, 19.666%@100, NDCG: 5.301%@20, 9.870%@100, Time: 5.436s
Save model to checkpoints\LightGCN_BPRTrainer_LGCNDataset_5.301.pth
Epoch 430/1500, Loss: 0.028313, Time: 169.523s
Test result. Precision: 2.911%@20, 1.810%@100, Recall: 6.484%@20, 19.674%@100, NDCG: 5.302%@20, 9.871%@100, Time: 5.374s
Save model to checkpoints\LightGCN_BPRTrainer_LGCNDataset_5.302.pth
Epoch 431/1500, Loss: 0.028178, Time: 170.073s
Test result. Precision: 2.908%@20, 1.811%@100, Recall: 6.488%@20, 19.689%@100, NDCG: 5.303%@20, 9.877%@100, Time: 5.499s
Save model to checkpoints\LightGCN_BPRTrainer_LGCNDataset_5.303.pth
Epoch 432/1500, Loss: 0.028128, Time: 169.491s
Test result. Precision: 2.912%@20, 1.811%@100, Recall: 6.489%@20, 19.689%@100, NDCG: 5.305%@20, 9.876%@100, Time: 5.374s
Save model to checkpoints\LightGCN_BPRTrainer_LGCNDataset_5.305.pth
Epoch 433/1500, Loss: 0.028335, Time: 169.766s
Test result. Precision: 2.909%@20, 1.810%@100, Recall: 6.486%@20, 19.668%@100, NDCG: 5.306%@20, 9.873%@100, Time: 5.389s
Save model to checkpoints\LightGCN_BPRTrainer_LGCNDataset_5.306.pth
Epoch 434/1500, Loss: 0.028355, Time: 169.382s
Test result. Precision: 2.905%@20, 1.810%@100, Recall: 6.472%@20, 19.671%@100, NDCG: 5.299%@20, 9.871%@100, Time: 5.436s
Save model to checkpoints\LightGCN_BPRTrainer_LGCNDataset_5.299.pth
Epoch 435/1500, Loss: 0.028084, Time: 169.824s
Test result. Precision: 2.905%@20, 1.809%@100, Recall: 6.474%@20, 19.659%@100, NDCG: 5.292%@20, 9.859%@100, Time: 5.327s
Save model to checkpoints\LightGCN_BPRTrainer_LGCNDataset_5.292.pth
Epoch 436/1500, Loss: 0.028021, Time: 169.705s
Test result. Precision: 2.904%@20, 1.810%@100, Recall: 6.472%@20, 19.655%@100, NDCG: 5.291%@20, 9.861%@100, Time: 5.436s
Save model to checkpoints\LightGCN_BPRTrainer_LGCNDataset_5.291.pth
Epoch 437/1500, Loss: 0.027944, Time: 169.710s
Test result. Precision: 2.905%@20, 1.810%@100, Recall: 6.470%@20, 19.662%@100, NDCG: 5.292%@20, 9.864%@100, Time: 5.327s
Save model to checkpoints\LightGCN_BPRTrainer_LGCNDataset_5.292.pth
Epoch 438/1500, Loss: 0.028019, Time: 169.935s
Test result. Precision: 2.904%@20, 1.810%@100, Recall: 6.466%@20, 19.662%@100, NDCG: 5.294%@20, 9.866%@100, Time: 5.436s
Save model to checkpoints\LightGCN_BPRTrainer_LGCNDataset_5.294.pth
Epoch 439/1500, Loss: 0.028150, Time: 169.770s
Test result. Precision: 2.912%@20, 1.811%@100, Recall: 6.485%@20, 19.676%@100, NDCG: 5.301%@20, 9.870%@100, Time: 5.421s
Save model to checkpoints\LightGCN_BPRTrainer_LGCNDataset_5.301.pth
Epoch 440/1500, Loss: 0.028146, Time: 169.288s
Test result. Precision: 2.907%@20, 1.809%@100, Recall: 6.459%@20, 19.659%@100, NDCG: 5.294%@20, 9.866%@100, Time: 5.405s
Save model to checkpoints\LightGCN_BPRTrainer_LGCNDataset_5.294.pth
Epoch 441/1500, Loss: 0.028265, Time: 169.729s
Test result. Precision: 2.911%@20, 1.811%@100, Recall: 6.468%@20, 19.679%@100, NDCG: 5.306%@20, 9.880%@100, Time: 5.342s
Save model to checkpoints\LightGCN_BPRTrainer_LGCNDataset_5.306.pth
Epoch 442/1500, Loss: 0.028177, Time: 170.273s
Test result. Precision: 2.919%@20, 1.811%@100, Recall: 6.492%@20, 19.679%@100, NDCG: 5.319%@20, 9.884%@100, Time: 5.452s
Save model to checkpoints\LightGCN_BPRTrainer_LGCNDataset_5.319.pth
Epoch 443/1500, Loss: 0.028085, Time: 169.570s
Test result. Precision: 2.918%@20, 1.813%@100, Recall: 6.493%@20, 19.700%@100, NDCG: 5.311%@20, 9.883%@100, Time: 5.358s
Save model to checkpoints\LightGCN_BPRTrainer_LGCNDataset_5.311.pth
Epoch 444/1500, Loss: 0.028163, Time: 169.763s
Test result. Precision: 2.915%@20, 1.812%@100, Recall: 6.480%@20, 19.688%@100, NDCG: 5.310%@20, 9.884%@100, Time: 5.452s
Save model to checkpoints\LightGCN_BPRTrainer_LGCNDataset_5.310.pth
Epoch 445/1500, Loss: 0.028080, Time: 169.751s
Test result. Precision: 2.911%@20, 1.810%@100, Recall: 6.481%@20, 19.672%@100, NDCG: 5.310%@20, 9.878%@100, Time: 5.499s
Save model to checkpoints\LightGCN_BPRTrainer_LGCNDataset_5.310.pth
Epoch 446/1500, Loss: 0.027958, Time: 169.719s
Test result. Precision: 2.915%@20, 1.810%@100, Recall: 6.485%@20, 19.666%@100, NDCG: 5.312%@20, 9.878%@100, Time: 5.327s
Save model to checkpoints\LightGCN_BPRTrainer_LGCNDataset_5.312.pth
Epoch 447/1500, Loss: 0.028169, Time: 169.585s
Test result. Precision: 2.910%@20, 1.810%@100, Recall: 6.486%@20, 19.677%@100, NDCG: 5.319%@20, 9.890%@100, Time: 5.342s
Save model to checkpoints\LightGCN_BPRTrainer_LGCNDataset_5.319.pth
Epoch 448/1500, Loss: 0.028209, Time: 169.923s
Test result. Precision: 2.912%@20, 1.813%@100, Recall: 6.494%@20, 19.689%@100, NDCG: 5.319%@20, 9.894%@100, Time: 5.499s
Save model to checkpoints\LightGCN_BPRTrainer_LGCNDataset_5.319.pth
Epoch 449/1500, Loss: 0.027917, Time: 169.611s
Test result. Precision: 2.916%@20, 1.812%@100, Recall: 6.500%@20, 19.684%@100, NDCG: 5.323%@20, 9.893%@100, Time: 5.358s
Save model to checkpoints\LightGCN_BPRTrainer_LGCNDataset_5.323.pth
Epoch 450/1500, Loss: 0.027887, Time: 169.679s
Test result. Precision: 2.909%@20, 1.812%@100, Recall: 6.486%@20, 19.678%@100, NDCG: 5.312%@20, 9.887%@100, Time: 5.358s
Save model to checkpoints\LightGCN_BPRTrainer_LGCNDataset_5.312.pth
Epoch 451/1500, Loss: 0.028003, Time: 169.455s
Test result. Precision: 2.921%@20, 1.816%@100, Recall: 6.514%@20, 19.717%@100, NDCG: 5.331%@20, 9.908%@100, Time: 5.342s
Save model to checkpoints\LightGCN_BPRTrainer_LGCNDataset_5.331.pth
Epoch 452/1500, Loss: 0.028054, Time: 169.695s
Test result. Precision: 2.920%@20, 1.815%@100, Recall: 6.508%@20, 19.710%@100, NDCG: 5.328%@20, 9.904%@100, Time: 5.639s
Save model to checkpoints\LightGCN_BPRTrainer_LGCNDataset_5.328.pth
Epoch 453/1500, Loss: 0.027998, Time: 169.704s
Test result. Precision: 2.918%@20, 1.818%@100, Recall: 6.509%@20, 19.729%@100, NDCG: 5.323%@20, 9.906%@100, Time: 5.561s
Save model to checkpoints\LightGCN_BPRTrainer_LGCNDataset_5.323.pth
Epoch 454/1500, Loss: 0.028110, Time: 169.741s
Test result. Precision: 2.920%@20, 1.816%@100, Recall: 6.511%@20, 19.713%@100, NDCG: 5.327%@20, 9.903%@100, Time: 5.499s
Save model to checkpoints\LightGCN_BPRTrainer_LGCNDataset_5.327.pth
Epoch 455/1500, Loss: 0.027984, Time: 169.710s
Test result. Precision: 2.916%@20, 1.816%@100, Recall: 6.500%@20, 19.710%@100, NDCG: 5.323%@20, 9.902%@100, Time: 5.452s
Save model to checkpoints\LightGCN_BPRTrainer_LGCNDataset_5.323.pth
Epoch 456/1500, Loss: 0.028113, Time: 169.648s
Test result. Precision: 2.917%@20, 1.813%@100, Recall: 6.504%@20, 19.682%@100, NDCG: 5.329%@20, 9.896%@100, Time: 5.421s
Save model to checkpoints\LightGCN_BPRTrainer_LGCNDataset_5.329.pth
Epoch 457/1500, Loss: 0.028018, Time: 169.639s
Test result. Precision: 2.917%@20, 1.814%@100, Recall: 6.496%@20, 19.699%@100, NDCG: 5.319%@20, 9.893%@100, Time: 5.471s
Save model to checkpoints\LightGCN_BPRTrainer_LGCNDataset_5.319.pth
Epoch 458/1500, Loss: 0.027984, Time: 169.695s
Test result. Precision: 2.917%@20, 1.816%@100, Recall: 6.503%@20, 19.730%@100, NDCG: 5.327%@20, 9.907%@100, Time: 5.467s
Save model to checkpoints\LightGCN_BPRTrainer_LGCNDataset_5.327.pth
Epoch 459/1500, Loss: 0.027909, Time: 169.741s
Test result. Precision: 2.913%@20, 1.816%@100, Recall: 6.487%@20, 19.706%@100, NDCG: 5.320%@20, 9.901%@100, Time: 5.358s
Save model to checkpoints\LightGCN_BPRTrainer_LGCNDataset_5.320.pth
Epoch 460/1500, Loss: 0.027839, Time: 169.752s
Test result. Precision: 2.921%@20, 1.815%@100, Recall: 6.505%@20, 19.708%@100, NDCG: 5.335%@20, 9.907%@100, Time: 5.452s
Save model to checkpoints\LightGCN_BPRTrainer_LGCNDataset_5.335.pth
Epoch 461/1500, Loss: 0.027986, Time: 169.689s
Test result. Precision: 2.918%@20, 1.813%@100, Recall: 6.504%@20, 19.682%@100, NDCG: 5.327%@20, 9.893%@100, Time: 5.358s
Save model to checkpoints\LightGCN_BPRTrainer_LGCNDataset_5.327.pth
Epoch 462/1500, Loss: 0.027741, Time: 169.636s
Test result. Precision: 2.915%@20, 1.814%@100, Recall: 6.482%@20, 19.697%@100, NDCG: 5.323%@20, 9.900%@100, Time: 5.467s
Save model to checkpoints\LightGCN_BPRTrainer_LGCNDataset_5.323.pth
Epoch 463/1500, Loss: 0.027826, Time: 169.769s
Test result. Precision: 2.910%@20, 1.813%@100, Recall: 6.475%@20, 19.688%@100, NDCG: 5.314%@20, 9.891%@100, Time: 5.561s
Save model to checkpoints\LightGCN_BPRTrainer_LGCNDataset_5.314.pth
Epoch 464/1500, Loss: 0.027838, Time: 169.497s
Test result. Precision: 2.909%@20, 1.815%@100, Recall: 6.482%@20, 19.709%@100, NDCG: 5.311%@20, 9.894%@100, Time: 5.358s
Save model to checkpoints\LightGCN_BPRTrainer_LGCNDataset_5.311.pth
Epoch 465/1500, Loss: 0.027888, Time: 169.733s
Test result. Precision: 2.909%@20, 1.817%@100, Recall: 6.472%@20, 19.729%@100, NDCG: 5.302%@20, 9.894%@100, Time: 5.452s
Save model to checkpoints\LightGCN_BPRTrainer_LGCNDataset_5.302.pth
Epoch 466/1500, Loss: 0.027809, Time: 169.601s
Test result. Precision: 2.913%@20, 1.817%@100, Recall: 6.483%@20, 19.729%@100, NDCG: 5.311%@20, 9.900%@100, Time: 5.389s
Save model to checkpoints\LightGCN_BPRTrainer_LGCNDataset_5.311.pth
Epoch 467/1500, Loss: 0.027634, Time: 169.492s
Test result. Precision: 2.911%@20, 1.815%@100, Recall: 6.487%@20, 19.700%@100, NDCG: 5.306%@20, 9.885%@100, Time: 5.499s
Save model to checkpoints\LightGCN_BPRTrainer_LGCNDataset_5.306.pth
Epoch 468/1500, Loss: 0.027912, Time: 169.460s
Test result. Precision: 2.917%@20, 1.818%@100, Recall: 6.498%@20, 19.728%@100, NDCG: 5.316%@20, 9.899%@100, Time: 5.514s
Save model to checkpoints\LightGCN_BPRTrainer_LGCNDataset_5.316.pth
Epoch 469/1500, Loss: 0.027821, Time: 169.632s
Test result. Precision: 2.915%@20, 1.817%@100, Recall: 6.489%@20, 19.726%@100, NDCG: 5.316%@20, 9.902%@100, Time: 5.405s
Save model to checkpoints\LightGCN_BPRTrainer_LGCNDataset_5.316.pth
Epoch 470/1500, Loss: 0.027786, Time: 169.741s
Test result. Precision: 2.923%@20, 1.817%@100, Recall: 6.508%@20, 19.721%@100, NDCG: 5.325%@20, 9.902%@100, Time: 5.405s
Save model to checkpoints\LightGCN_BPRTrainer_LGCNDataset_5.325.pth
Epoch 471/1500, Loss: 0.027710, Time: 169.898s
Test result. Precision: 2.921%@20, 1.818%@100, Recall: 6.509%@20, 19.751%@100, NDCG: 5.325%@20, 9.911%@100, Time: 5.639s
Save model to checkpoints\LightGCN_BPRTrainer_LGCNDataset_5.325.pth
Epoch 472/1500, Loss: 0.027827, Time: 169.876s
Test result. Precision: 2.917%@20, 1.817%@100, Recall: 6.498%@20, 19.728%@100, NDCG: 5.323%@20, 9.906%@100, Time: 5.389s
Save model to checkpoints\LightGCN_BPRTrainer_LGCNDataset_5.323.pth
Epoch 473/1500, Loss: 0.027702, Time: 169.679s
Test result. Precision: 2.916%@20, 1.817%@100, Recall: 6.490%@20, 19.735%@100, NDCG: 5.318%@20, 9.904%@100, Time: 5.436s
Save model to checkpoints\LightGCN_BPRTrainer_LGCNDataset_5.318.pth
Epoch 474/1500, Loss: 0.027870, Time: 169.564s
Test result. Precision: 2.917%@20, 1.816%@100, Recall: 6.499%@20, 19.729%@100, NDCG: 5.320%@20, 9.901%@100, Time: 5.436s
Save model to checkpoints\LightGCN_BPRTrainer_LGCNDataset_5.320.pth
Epoch 475/1500, Loss: 0.027853, Time: 169.804s
Test result. Precision: 2.920%@20, 1.816%@100, Recall: 6.509%@20, 19.729%@100, NDCG: 5.319%@20, 9.897%@100, Time: 5.405s
Save model to checkpoints\LightGCN_BPRTrainer_LGCNDataset_5.319.pth
Epoch 476/1500, Loss: 0.027603, Time: 170.069s
Test result. Precision: 2.921%@20, 1.816%@100, Recall: 6.510%@20, 19.732%@100, NDCG: 5.324%@20, 9.903%@100, Time: 5.389s
Save model to checkpoints\LightGCN_BPRTrainer_LGCNDataset_5.324.pth
Epoch 477/1500, Loss: 0.027938, Time: 169.601s
Test result. Precision: 2.921%@20, 1.816%@100, Recall: 6.511%@20, 19.720%@100, NDCG: 5.321%@20, 9.898%@100, Time: 5.452s
Save model to checkpoints\LightGCN_BPRTrainer_LGCNDataset_5.321.pth
Epoch 478/1500, Loss: 0.027811, Time: 170.085s
Test result. Precision: 2.929%@20, 1.819%@100, Recall: 6.527%@20, 19.750%@100, NDCG: 5.332%@20, 9.911%@100, Time: 5.483s
Save model to checkpoints\LightGCN_BPRTrainer_LGCNDataset_5.332.pth
Epoch 479/1500, Loss: 0.027796, Time: 169.710s
Test result. Precision: 2.926%@20, 1.817%@100, Recall: 6.524%@20, 19.725%@100, NDCG: 5.327%@20, 9.901%@100, Time: 5.358s
Save model to checkpoints\LightGCN_BPRTrainer_LGCNDataset_5.327.pth
Epoch 480/1500, Loss: 0.027520, Time: 169.476s
Test result. Precision: 2.919%@20, 1.817%@100, Recall: 6.509%@20, 19.739%@100, NDCG: 5.323%@20, 9.906%@100, Time: 5.358s
Save model to checkpoints\LightGCN_BPRTrainer_LGCNDataset_5.323.pth
Epoch 481/1500, Loss: 0.027638, Time: 170.085s
Test result. Precision: 2.929%@20, 1.816%@100, Recall: 6.527%@20, 19.721%@100, NDCG: 5.331%@20, 9.900%@100, Time: 5.452s
Save model to checkpoints\LightGCN_BPRTrainer_LGCNDataset_5.331.pth
Epoch 482/1500, Loss: 0.027715, Time: 169.677s
Test result. Precision: 2.929%@20, 1.815%@100, Recall: 6.524%@20, 19.716%@100, NDCG: 5.334%@20, 9.902%@100, Time: 5.452s
Save model to checkpoints\LightGCN_BPRTrainer_LGCNDataset_5.334.pth
Epoch 483/1500, Loss: 0.027619, Time: 169.928s
Test result. Precision: 2.929%@20, 1.817%@100, Recall: 6.538%@20, 19.740%@100, NDCG: 5.336%@20, 9.908%@100, Time: 5.405s
Save model to checkpoints\LightGCN_BPRTrainer_LGCNDataset_5.336.pth
Epoch 484/1500, Loss: 0.027585, Time: 169.651s
Test result. Precision: 2.923%@20, 1.814%@100, Recall: 6.514%@20, 19.692%@100, NDCG: 5.325%@20, 9.891%@100, Time: 5.358s
Save model to checkpoints\LightGCN_BPRTrainer_LGCNDataset_5.325.pth
Epoch 485/1500, Loss: 0.027777, Time: 169.845s
Test result. Precision: 2.924%@20, 1.814%@100, Recall: 6.519%@20, 19.705%@100, NDCG: 5.329%@20, 9.897%@100, Time: 5.483s
Save model to checkpoints\LightGCN_BPRTrainer_LGCNDataset_5.329.pth
Epoch 486/1500, Loss: 0.027587, Time: 169.768s
Test result. Precision: 2.916%@20, 1.815%@100, Recall: 6.496%@20, 19.723%@100, NDCG: 5.317%@20, 9.900%@100, Time: 5.358s
Save model to checkpoints\LightGCN_BPRTrainer_LGCNDataset_5.317.pth
Epoch 487/1500, Loss: 0.027673, Time: 169.698s
Test result. Precision: 2.926%@20, 1.817%@100, Recall: 6.517%@20, 19.739%@100, NDCG: 5.333%@20, 9.912%@100, Time: 5.405s
Save model to checkpoints\LightGCN_BPRTrainer_LGCNDataset_5.333.pth
Epoch 488/1500, Loss: 0.027456, Time: 169.814s
Test result. Precision: 2.925%@20, 1.818%@100, Recall: 6.513%@20, 19.729%@100, NDCG: 5.336%@20, 9.916%@100, Time: 5.436s
Save model to checkpoints\LightGCN_BPRTrainer_LGCNDataset_5.336.pth
Epoch 489/1500, Loss: 0.027713, Time: 169.538s
Test result. Precision: 2.919%@20, 1.818%@100, Recall: 6.498%@20, 19.729%@100, NDCG: 5.331%@20, 9.918%@100, Time: 5.327s
Save model to checkpoints\LightGCN_BPRTrainer_LGCNDataset_5.331.pth
Epoch 490/1500, Loss: 0.027734, Time: 169.707s
Test result. Precision: 2.918%@20, 1.815%@100, Recall: 6.498%@20, 19.705%@100, NDCG: 5.327%@20, 9.905%@100, Time: 5.452s
Save model to checkpoints\LightGCN_BPRTrainer_LGCNDataset_5.327.pth
Epoch 491/1500, Loss: 0.027581, Time: 170.018s
Test result. Precision: 2.928%@20, 1.816%@100, Recall: 6.512%@20, 19.715%@100, NDCG: 5.341%@20, 9.914%@100, Time: 5.483s
Save model to checkpoints\LightGCN_BPRTrainer_LGCNDataset_5.341.pth
Epoch 492/1500, Loss: 0.027511, Time: 169.386s
Test result. Precision: 2.928%@20, 1.815%@100, Recall: 6.515%@20, 19.715%@100, NDCG: 5.342%@20, 9.914%@100, Time: 5.342s
Save model to checkpoints\LightGCN_BPRTrainer_LGCNDataset_5.342.pth
Epoch 493/1500, Loss: 0.027850, Time: 169.927s
Test result. Precision: 2.936%@20, 1.815%@100, Recall: 6.541%@20, 19.711%@100, NDCG: 5.358%@20, 9.918%@100, Time: 5.436s
Save model to checkpoints\LightGCN_BPRTrainer_LGCNDataset_5.358.pth
Epoch 494/1500, Loss: 0.027540, Time: 169.257s
Test result. Precision: 2.928%@20, 1.815%@100, Recall: 6.515%@20, 19.712%@100, NDCG: 5.345%@20, 9.915%@100, Time: 5.358s
Save model to checkpoints\LightGCN_BPRTrainer_LGCNDataset_5.345.pth
Epoch 495/1500, Loss: 0.027646, Time: 169.460s
Test result. Precision: 2.928%@20, 1.814%@100, Recall: 6.532%@20, 19.707%@100, NDCG: 5.351%@20, 9.914%@100, Time: 5.389s
Save model to checkpoints\LightGCN_BPRTrainer_LGCNDataset_5.351.pth
Epoch 496/1500, Loss: 0.027832, Time: 169.544s
Test result. Precision: 2.930%@20, 1.817%@100, Recall: 6.529%@20, 19.720%@100, NDCG: 5.347%@20, 9.916%@100, Time: 5.452s
Save model to checkpoints\LightGCN_BPRTrainer_LGCNDataset_5.347.pth
Epoch 497/1500, Loss: 0.027557, Time: 169.523s
Test result. Precision: 2.930%@20, 1.818%@100, Recall: 6.534%@20, 19.736%@100, NDCG: 5.345%@20, 9.918%@100, Time: 5.342s
Save model to checkpoints\LightGCN_BPRTrainer_LGCNDataset_5.345.pth
Epoch 498/1500, Loss: 0.027489, Time: 169.487s
Test result. Precision: 2.934%@20, 1.818%@100, Recall: 6.538%@20, 19.744%@100, NDCG: 5.351%@20, 9.924%@100, Time: 5.452s
Save model to checkpoints\LightGCN_BPRTrainer_LGCNDataset_5.351.pth
Epoch 499/1500, Loss: 0.027506, Time: 169.767s
Test result. Precision: 2.931%@20, 1.818%@100, Recall: 6.526%@20, 19.759%@100, NDCG: 5.344%@20, 9.923%@100, Time: 5.546s
Save model to checkpoints\LightGCN_BPRTrainer_LGCNDataset_5.344.pth
Epoch 500/1500, Loss: 0.027649, Time: 170.789s
Test result. Precision: 2.933%@20, 1.819%@100, Recall: 6.522%@20, 19.754%@100, NDCG: 5.345%@20, 9.926%@100, Time: 5.499s
Save model to checkpoints\LightGCN_BPRTrainer_LGCNDataset_5.345.pth
Epoch 501/1500, Loss: 0.027571, Time: 169.867s
Test result. Precision: 2.927%@20, 1.817%@100, Recall: 6.507%@20, 19.728%@100, NDCG: 5.338%@20, 9.916%@100, Time: 5.452s
Save model to checkpoints\LightGCN_BPRTrainer_LGCNDataset_5.338.pth
Epoch 502/1500, Loss: 0.027314, Time: 170.279s
Test result. Precision: 2.934%@20, 1.817%@100, Recall: 6.521%@20, 19.728%@100, NDCG: 5.339%@20, 9.911%@100, Time: 5.389s
Save model to checkpoints\LightGCN_BPRTrainer_LGCNDataset_5.339.pth
Epoch 503/1500, Loss: 0.027758, Time: 170.295s
Test result. Precision: 2.944%@20, 1.819%@100, Recall: 6.543%@20, 19.754%@100, NDCG: 5.356%@20, 9.926%@100, Time: 5.421s
Save model to checkpoints\LightGCN_BPRTrainer_LGCNDataset_5.356.pth
Epoch 504/1500, Loss: 0.027580, Time: 169.474s
Test result. Precision: 2.937%@20, 1.818%@100, Recall: 6.531%@20, 19.739%@100, NDCG: 5.340%@20, 9.911%@100, Time: 5.389s
Save model to checkpoints\LightGCN_BPRTrainer_LGCNDataset_5.340.pth
Epoch 505/1500, Loss: 0.027618, Time: 169.656s
Test result. Precision: 2.932%@20, 1.816%@100, Recall: 6.521%@20, 19.729%@100, NDCG: 5.337%@20, 9.909%@100, Time: 5.514s
Save model to checkpoints\LightGCN_BPRTrainer_LGCNDataset_5.337.pth
Epoch 506/1500, Loss: 0.027359, Time: 170.644s
Test result. Precision: 2.933%@20, 1.818%@100, Recall: 6.519%@20, 19.746%@100, NDCG: 5.335%@20, 9.913%@100, Time: 5.389s
Save model to checkpoints\LightGCN_BPRTrainer_LGCNDataset_5.335.pth
Epoch 507/1500, Loss: 0.027433, Time: 170.391s
Test result. Precision: 2.934%@20, 1.818%@100, Recall: 6.526%@20, 19.755%@100, NDCG: 5.346%@20, 9.923%@100, Time: 5.389s
Save model to checkpoints\LightGCN_BPRTrainer_LGCNDataset_5.346.pth
Epoch 508/1500, Loss: 0.027523, Time: 170.487s
Test result. Precision: 2.936%@20, 1.821%@100, Recall: 6.529%@20, 19.783%@100, NDCG: 5.342%@20, 9.928%@100, Time: 5.439s
Save model to checkpoints\LightGCN_BPRTrainer_LGCNDataset_5.342.pth
Epoch 509/1500, Loss: 0.027622, Time: 170.119s
Test result. Precision: 2.929%@20, 1.821%@100, Recall: 6.519%@20, 19.784%@100, NDCG: 5.333%@20, 9.926%@100, Time: 5.421s
Save model to checkpoints\LightGCN_BPRTrainer_LGCNDataset_5.333.pth
Epoch 510/1500, Loss: 0.027590, Time: 170.515s
Test result. Precision: 2.924%@20, 1.821%@100, Recall: 6.511%@20, 19.770%@100, NDCG: 5.333%@20, 9.926%@100, Time: 5.483s
Save model to checkpoints\LightGCN_BPRTrainer_LGCNDataset_5.333.pth
Epoch 511/1500, Loss: 0.027411, Time: 170.272s
Test result. Precision: 2.927%@20, 1.819%@100, Recall: 6.519%@20, 19.766%@100, NDCG: 5.331%@20, 9.917%@100, Time: 5.561s
Save model to checkpoints\LightGCN_BPRTrainer_LGCNDataset_5.331.pth
Epoch 512/1500, Loss: 0.027556, Time: 169.892s
Test result. Precision: 2.924%@20, 1.819%@100, Recall: 6.504%@20, 19.758%@100, NDCG: 5.328%@20, 9.917%@100, Time: 5.467s
Save model to checkpoints\LightGCN_BPRTrainer_LGCNDataset_5.328.pth
Epoch 513/1500, Loss: 0.027491, Time: 170.551s
Test result. Precision: 2.921%@20, 1.818%@100, Recall: 6.502%@20, 19.758%@100, NDCG: 5.322%@20, 9.913%@100, Time: 5.436s
Save model to checkpoints\LightGCN_BPRTrainer_LGCNDataset_5.322.pth
Epoch 514/1500, Loss: 0.027455, Time: 170.134s
Test result. Precision: 2.930%@20, 1.816%@100, Recall: 6.521%@20, 19.723%@100, NDCG: 5.327%@20, 9.899%@100, Time: 5.452s
Save model to checkpoints\LightGCN_BPRTrainer_LGCNDataset_5.327.pth
Epoch 515/1500, Loss: 0.027320, Time: 169.969s
Test result. Precision: 2.929%@20, 1.816%@100, Recall: 6.521%@20, 19.726%@100, NDCG: 5.327%@20, 9.901%@100, Time: 5.421s
Save model to checkpoints\LightGCN_BPRTrainer_LGCNDataset_5.327.pth
Epoch 516/1500, Loss: 0.027564, Time: 169.822s
Test result. Precision: 2.933%@20, 1.817%@100, Recall: 6.529%@20, 19.755%@100, NDCG: 5.336%@20, 9.912%@100, Time: 5.561s
Save model to checkpoints\LightGCN_BPRTrainer_LGCNDataset_5.336.pth
Epoch 517/1500, Loss: 0.027397, Time: 170.471s
Test result. Precision: 2.933%@20, 1.816%@100, Recall: 6.530%@20, 19.736%@100, NDCG: 5.333%@20, 9.904%@100, Time: 5.358s
Save model to checkpoints\LightGCN_BPRTrainer_LGCNDataset_5.333.pth
Epoch 518/1500, Loss: 0.027650, Time: 170.335s
Test result. Precision: 2.929%@20, 1.819%@100, Recall: 6.512%@20, 19.767%@100, NDCG: 5.334%@20, 9.923%@100, Time: 5.436s
Save model to checkpoints\LightGCN_BPRTrainer_LGCNDataset_5.334.pth
Epoch 519/1500, Loss: 0.027444, Time: 170.038s
Test result. Precision: 2.932%@20, 1.820%@100, Recall: 6.526%@20, 19.770%@100, NDCG: 5.346%@20, 9.931%@100, Time: 5.389s
Save model to checkpoints\LightGCN_BPRTrainer_LGCNDataset_5.346.pth
Epoch 520/1500, Loss: 0.027431, Time: 169.741s
Test result. Precision: 2.928%@20, 1.817%@100, Recall: 6.514%@20, 19.743%@100, NDCG: 5.335%@20, 9.917%@100, Time: 5.499s
Save model to checkpoints\LightGCN_BPRTrainer_LGCNDataset_5.335.pth
Epoch 521/1500, Loss: 0.027237, Time: 169.985s
Test result. Precision: 2.928%@20, 1.819%@100, Recall: 6.507%@20, 19.775%@100, NDCG: 5.338%@20, 9.929%@100, Time: 5.483s
Save model to checkpoints\LightGCN_BPRTrainer_LGCNDataset_5.338.pth
Epoch 522/1500, Loss: 0.027300, Time: 170.241s
Test result. Precision: 2.928%@20, 1.821%@100, Recall: 6.506%@20, 19.795%@100, NDCG: 5.344%@20, 9.942%@100, Time: 5.436s
Save model to checkpoints\LightGCN_BPRTrainer_LGCNDataset_5.344.pth
Epoch 523/1500, Loss: 0.027454, Time: 169.826s
Test result. Precision: 2.928%@20, 1.821%@100, Recall: 6.505%@20, 19.787%@100, NDCG: 5.342%@20, 9.937%@100, Time: 5.346s
Save model to checkpoints\LightGCN_BPRTrainer_LGCNDataset_5.342.pth
Epoch 524/1500, Loss: 0.027374, Time: 170.482s
Test result. Precision: 2.927%@20, 1.820%@100, Recall: 6.500%@20, 19.801%@100, NDCG: 5.339%@20, 9.939%@100, Time: 5.442s
Save model to checkpoints\LightGCN_BPRTrainer_LGCNDataset_5.339.pth
Epoch 525/1500, Loss: 0.027383, Time: 169.926s
Test result. Precision: 2.923%@20, 1.817%@100, Recall: 6.493%@20, 19.744%@100, NDCG: 5.335%@20, 9.923%@100, Time: 5.374s
Save model to checkpoints\LightGCN_BPRTrainer_LGCNDataset_5.335.pth
Epoch 526/1500, Loss: 0.027522, Time: 169.835s
Test result. Precision: 2.933%@20, 1.819%@100, Recall: 6.512%@20, 19.766%@100, NDCG: 5.344%@20, 9.929%@100, Time: 5.421s
Save model to checkpoints\LightGCN_BPRTrainer_LGCNDataset_5.344.pth
Epoch 527/1500, Loss: 0.027348, Time: 170.055s
Test result. Precision: 2.930%@20, 1.819%@100, Recall: 6.500%@20, 19.758%@100, NDCG: 5.335%@20, 9.923%@100, Time: 5.405s
Save model to checkpoints\LightGCN_BPRTrainer_LGCNDataset_5.335.pth
Epoch 528/1500, Loss: 0.027199, Time: 170.243s
Test result. Precision: 2.928%@20, 1.819%@100, Recall: 6.511%@20, 19.773%@100, NDCG: 5.342%@20, 9.931%@100, Time: 5.530s
Save model to checkpoints\LightGCN_BPRTrainer_LGCNDataset_5.342.pth
Epoch 529/1500, Loss: 0.027518, Time: 170.085s
Test result. Precision: 2.930%@20, 1.819%@100, Recall: 6.510%@20, 19.776%@100, NDCG: 5.349%@20, 9.938%@100, Time: 5.467s
Save model to checkpoints\LightGCN_BPRTrainer_LGCNDataset_5.349.pth
Epoch 530/1500, Loss: 0.027354, Time: 170.376s
Test result. Precision: 2.931%@20, 1.820%@100, Recall: 6.521%@20, 19.774%@100, NDCG: 5.353%@20, 9.938%@100, Time: 5.561s
Save model to checkpoints\LightGCN_BPRTrainer_LGCNDataset_5.353.pth
Epoch 531/1500, Loss: 0.027467, Time: 170.273s
Test result. Precision: 2.935%@20, 1.822%@100, Recall: 6.525%@20, 19.783%@100, NDCG: 5.360%@20, 9.948%@100, Time: 5.546s
Save model to checkpoints\LightGCN_BPRTrainer_LGCNDataset_5.360.pth
Epoch 532/1500, Loss: 0.027323, Time: 170.241s
Test result. Precision: 2.937%@20, 1.823%@100, Recall: 6.523%@20, 19.783%@100, NDCG: 5.361%@20, 9.950%@100, Time: 5.421s
Save model to checkpoints\LightGCN_BPRTrainer_LGCNDataset_5.361.pth
Epoch 533/1500, Loss: 0.027311, Time: 169.935s
Test result. Precision: 2.937%@20, 1.822%@100, Recall: 6.527%@20, 19.770%@100, NDCG: 5.360%@20, 9.945%@100, Time: 5.439s
Save model to checkpoints\LightGCN_BPRTrainer_LGCNDataset_5.360.pth
Epoch 534/1500, Loss: 0.027228, Time: 170.336s
Test result. Precision: 2.934%@20, 1.822%@100, Recall: 6.514%@20, 19.776%@100, NDCG: 5.350%@20, 9.942%@100, Time: 5.483s
Save model to checkpoints\LightGCN_BPRTrainer_LGCNDataset_5.350.pth
Epoch 535/1500, Loss: 0.027447, Time: 170.038s
Test result. Precision: 2.937%@20, 1.821%@100, Recall: 6.520%@20, 19.778%@100, NDCG: 5.348%@20, 9.937%@100, Time: 5.389s
Save model to checkpoints\LightGCN_BPRTrainer_LGCNDataset_5.348.pth
Epoch 536/1500, Loss: 0.027421, Time: 169.921s
Test result. Precision: 2.935%@20, 1.822%@100, Recall: 6.529%@20, 19.785%@100, NDCG: 5.350%@20, 9.941%@100, Time: 5.452s
Save model to checkpoints\LightGCN_BPRTrainer_LGCNDataset_5.350.pth
Epoch 537/1500, Loss: 0.027513, Time: 170.079s
Test result. Precision: 2.939%@20, 1.823%@100, Recall: 6.530%@20, 19.795%@100, NDCG: 5.358%@20, 9.950%@100, Time: 5.452s
Save model to checkpoints\LightGCN_BPRTrainer_LGCNDataset_5.358.pth
Epoch 538/1500, Loss: 0.027300, Time: 170.226s
Test result. Precision: 2.934%@20, 1.823%@100, Recall: 6.523%@20, 19.800%@100, NDCG: 5.351%@20, 9.947%@100, Time: 5.530s
Save model to checkpoints\LightGCN_BPRTrainer_LGCNDataset_5.351.pth
Epoch 539/1500, Loss: 0.027386, Time: 171.066s
Test result. Precision: 2.937%@20, 1.822%@100, Recall: 6.533%@20, 19.787%@100, NDCG: 5.361%@20, 9.950%@100, Time: 5.405s
Save model to checkpoints\LightGCN_BPRTrainer_LGCNDataset_5.361.pth
Epoch 540/1500, Loss: 0.027481, Time: 170.197s
Test result. Precision: 2.940%@20, 1.821%@100, Recall: 6.540%@20, 19.780%@100, NDCG: 5.360%@20, 9.944%@100, Time: 5.421s
Save model to checkpoints\LightGCN_BPRTrainer_LGCNDataset_5.360.pth
Epoch 541/1500, Loss: 0.027497, Time: 170.719s
Test result. Precision: 2.932%@20, 1.820%@100, Recall: 6.518%@20, 19.769%@100, NDCG: 5.353%@20, 9.942%@100, Time: 5.389s
Save model to checkpoints\LightGCN_BPRTrainer_LGCNDataset_5.353.pth
Epoch 542/1500, Loss: 0.027384, Time: 170.163s
Test result. Precision: 2.930%@20, 1.823%@100, Recall: 6.520%@20, 19.793%@100, NDCG: 5.352%@20, 9.951%@100, Time: 5.452s
Save model to checkpoints\LightGCN_BPRTrainer_LGCNDataset_5.352.pth
Epoch 543/1500, Loss: 0.027289, Time: 170.018s
Test result. Precision: 2.936%@20, 1.824%@100, Recall: 6.536%@20, 19.810%@100, NDCG: 5.359%@20, 9.957%@100, Time: 5.467s
Save model to checkpoints\LightGCN_BPRTrainer_LGCNDataset_5.359.pth
Epoch 544/1500, Loss: 0.027236, Time: 170.362s
Test result. Precision: 2.932%@20, 1.819%@100, Recall: 6.522%@20, 19.754%@100, NDCG: 5.348%@20, 9.932%@100, Time: 5.530s
Save model to checkpoints\LightGCN_BPRTrainer_LGCNDataset_5.348.pth
Epoch 545/1500, Loss: 0.027147, Time: 170.790s
Test result. Precision: 2.933%@20, 1.822%@100, Recall: 6.519%@20, 19.786%@100, NDCG: 5.345%@20, 9.939%@100, Time: 5.502s
Save model to checkpoints\LightGCN_BPRTrainer_LGCNDataset_5.345.pth
Epoch 546/1500, Loss: 0.027063, Time: 169.576s
Test result. Precision: 2.936%@20, 1.821%@100, Recall: 6.524%@20, 19.748%@100, NDCG: 5.352%@20, 9.936%@100, Time: 5.377s
Save model to checkpoints\LightGCN_BPRTrainer_LGCNDataset_5.352.pth
Epoch 547/1500, Loss: 0.027019, Time: 170.236s
Test result. Precision: 2.944%@20, 1.823%@100, Recall: 6.541%@20, 19.777%@100, NDCG: 5.362%@20, 9.947%@100, Time: 5.483s
Save model to checkpoints\LightGCN_BPRTrainer_LGCNDataset_5.362.pth
Epoch 548/1500, Loss: 0.027329, Time: 169.916s
Test result. Precision: 2.937%@20, 1.824%@100, Recall: 6.525%@20, 19.784%@100, NDCG: 5.356%@20, 9.949%@100, Time: 5.452s
Save model to checkpoints\LightGCN_BPRTrainer_LGCNDataset_5.356.pth
Epoch 549/1500, Loss: 0.027132, Time: 169.750s
Test result. Precision: 2.939%@20, 1.823%@100, Recall: 6.537%@20, 19.777%@100, NDCG: 5.358%@20, 9.945%@100, Time: 5.401s
Save model to checkpoints\LightGCN_BPRTrainer_LGCNDataset_5.358.pth
Epoch 550/1500, Loss: 0.027211, Time: 169.664s
Test result. Precision: 2.931%@20, 1.823%@100, Recall: 6.516%@20, 19.772%@100, NDCG: 5.348%@20, 9.943%@100, Time: 5.475s
Save model to checkpoints\LightGCN_BPRTrainer_LGCNDataset_5.348.pth
Epoch 551/1500, Loss: 0.027484, Time: 169.879s
Test result. Precision: 2.941%@20, 1.822%@100, Recall: 6.538%@20, 19.771%@100, NDCG: 5.362%@20, 9.947%@100, Time: 5.499s
Save model to checkpoints\LightGCN_BPRTrainer_LGCNDataset_5.362.pth
Epoch 552/1500, Loss: 0.027047, Time: 169.915s
Test result. Precision: 2.929%@20, 1.821%@100, Recall: 6.522%@20, 19.756%@100, NDCG: 5.342%@20, 9.930%@100, Time: 5.436s
Save model to checkpoints\LightGCN_BPRTrainer_LGCNDataset_5.342.pth
Epoch 553/1500, Loss: 0.027293, Time: 169.787s
Test result. Precision: 2.927%@20, 1.820%@100, Recall: 6.513%@20, 19.740%@100, NDCG: 5.338%@20, 9.925%@100, Time: 5.499s
Save model to checkpoints\LightGCN_BPRTrainer_LGCNDataset_5.338.pth
Epoch 554/1500, Loss: 0.027126, Time: 170.612s
Test result. Precision: 2.929%@20, 1.821%@100, Recall: 6.514%@20, 19.756%@100, NDCG: 5.342%@20, 9.933%@100, Time: 5.467s
Save model to checkpoints\LightGCN_BPRTrainer_LGCNDataset_5.342.pth
Epoch 555/1500, Loss: 0.027101, Time: 169.760s
Test result. Precision: 2.934%@20, 1.823%@100, Recall: 6.534%@20, 19.771%@100, NDCG: 5.347%@20, 9.936%@100, Time: 5.398s
Save model to checkpoints\LightGCN_BPRTrainer_LGCNDataset_5.347.pth
Epoch 556/1500, Loss: 0.027249, Time: 170.104s
Test result. Precision: 2.937%@20, 1.822%@100, Recall: 6.530%@20, 19.773%@100, NDCG: 5.350%@20, 9.936%@100, Time: 5.484s
Save model to checkpoints\LightGCN_BPRTrainer_LGCNDataset_5.350.pth
Epoch 557/1500, Loss: 0.027216, Time: 169.455s
Test result. Precision: 2.938%@20, 1.822%@100, Recall: 6.539%@20, 19.766%@100, NDCG: 5.353%@20, 9.935%@100, Time: 5.510s
Save model to checkpoints\LightGCN_BPRTrainer_LGCNDataset_5.353.pth
Epoch 558/1500, Loss: 0.027093, Time: 169.664s
Test result. Precision: 2.935%@20, 1.823%@100, Recall: 6.535%@20, 19.775%@100, NDCG: 5.349%@20, 9.937%@100, Time: 5.358s
Save model to checkpoints\LightGCN_BPRTrainer_LGCNDataset_5.349.pth
Epoch 559/1500, Loss: 0.026825, Time: 169.668s
Test result. Precision: 2.938%@20, 1.822%@100, Recall: 6.542%@20, 19.768%@100, NDCG: 5.351%@20, 9.933%@100, Time: 5.389s
Save model to checkpoints\LightGCN_BPRTrainer_LGCNDataset_5.351.pth
Epoch 560/1500, Loss: 0.027236, Time: 170.000s
Test result. Precision: 2.934%@20, 1.822%@100, Recall: 6.545%@20, 19.771%@100, NDCG: 5.350%@20, 9.932%@100, Time: 5.436s
Save model to checkpoints\LightGCN_BPRTrainer_LGCNDataset_5.350.pth
Epoch 561/1500, Loss: 0.027158, Time: 169.776s
Test result. Precision: 2.936%@20, 1.821%@100, Recall: 6.549%@20, 19.768%@100, NDCG: 5.353%@20, 9.934%@100, Time: 5.467s
Save model to checkpoints\LightGCN_BPRTrainer_LGCNDataset_5.353.pth
Epoch 562/1500, Loss: 0.027091, Time: 169.738s
Test result. Precision: 2.934%@20, 1.824%@100, Recall: 6.542%@20, 19.789%@100, NDCG: 5.354%@20, 9.947%@100, Time: 5.443s
Save model to checkpoints\LightGCN_BPRTrainer_LGCNDataset_5.354.pth
Epoch 563/1500, Loss: 0.026976, Time: 169.908s
Test result. Precision: 2.929%@20, 1.824%@100, Recall: 6.529%@20, 19.780%@100, NDCG: 5.348%@20, 9.945%@100, Time: 5.452s
Save model to checkpoints\LightGCN_BPRTrainer_LGCNDataset_5.348.pth
Epoch 564/1500, Loss: 0.027210, Time: 169.852s
Test result. Precision: 2.933%@20, 1.822%@100, Recall: 6.533%@20, 19.758%@100, NDCG: 5.351%@20, 9.938%@100, Time: 5.327s
Save model to checkpoints\LightGCN_BPRTrainer_LGCNDataset_5.351.pth
Epoch 565/1500, Loss: 0.027049, Time: 170.103s
Test result. Precision: 2.925%@20, 1.822%@100, Recall: 6.512%@20, 19.764%@100, NDCG: 5.339%@20, 9.935%@100, Time: 5.311s
Save model to checkpoints\LightGCN_BPRTrainer_LGCNDataset_5.339.pth
Epoch 566/1500, Loss: 0.027022, Time: 170.133s
Test result. Precision: 2.926%@20, 1.826%@100, Recall: 6.515%@20, 19.805%@100, NDCG: 5.345%@20, 9.953%@100, Time: 5.374s
Save model to checkpoints\LightGCN_BPRTrainer_LGCNDataset_5.345.pth
Epoch 567/1500, Loss: 0.027041, Time: 169.782s
Test result. Precision: 2.931%@20, 1.826%@100, Recall: 6.523%@20, 19.824%@100, NDCG: 5.355%@20, 9.962%@100, Time: 5.421s
Save model to checkpoints\LightGCN_BPRTrainer_LGCNDataset_5.355.pth
Epoch 568/1500, Loss: 0.027256, Time: 169.676s
Test result. Precision: 2.927%@20, 1.826%@100, Recall: 6.516%@20, 19.820%@100, NDCG: 5.345%@20, 9.956%@100, Time: 5.406s
Save model to checkpoints\LightGCN_BPRTrainer_LGCNDataset_5.345.pth
Epoch 569/1500, Loss: 0.027162, Time: 170.104s
Test result. Precision: 2.927%@20, 1.828%@100, Recall: 6.519%@20, 19.826%@100, NDCG: 5.352%@20, 9.964%@100, Time: 5.467s
Save model to checkpoints\LightGCN_BPRTrainer_LGCNDataset_5.352.pth
Epoch 570/1500, Loss: 0.027243, Time: 169.560s
Test result. Precision: 2.928%@20, 1.828%@100, Recall: 6.520%@20, 19.832%@100, NDCG: 5.351%@20, 9.964%@100, Time: 5.405s
Save model to checkpoints\LightGCN_BPRTrainer_LGCNDataset_5.351.pth
Epoch 571/1500, Loss: 0.027239, Time: 169.773s
Test result. Precision: 2.938%@20, 1.826%@100, Recall: 6.536%@20, 19.811%@100, NDCG: 5.352%@20, 9.950%@100, Time: 5.436s
Save model to checkpoints\LightGCN_BPRTrainer_LGCNDataset_5.352.pth
Epoch 572/1500, Loss: 0.027039, Time: 169.723s
Test result. Precision: 2.937%@20, 1.827%@100, Recall: 6.539%@20, 19.810%@100, NDCG: 5.363%@20, 9.963%@100, Time: 5.389s
Save model to checkpoints\LightGCN_BPRTrainer_LGCNDataset_5.363.pth
Epoch 573/1500, Loss: 0.027106, Time: 170.030s
Test result. Precision: 2.933%@20, 1.826%@100, Recall: 6.532%@20, 19.811%@100, NDCG: 5.358%@20, 9.960%@100, Time: 5.389s
Save model to checkpoints\LightGCN_BPRTrainer_LGCNDataset_5.358.pth
Epoch 574/1500, Loss: 0.027111, Time: 169.603s
Test result. Precision: 2.935%@20, 1.826%@100, Recall: 6.534%@20, 19.826%@100, NDCG: 5.358%@20, 9.964%@100, Time: 5.446s
Save model to checkpoints\LightGCN_BPRTrainer_LGCNDataset_5.358.pth
Epoch 575/1500, Loss: 0.026943, Time: 169.724s
Test result. Precision: 2.934%@20, 1.824%@100, Recall: 6.535%@20, 19.803%@100, NDCG: 5.356%@20, 9.954%@100, Time: 5.506s
Save model to checkpoints\LightGCN_BPRTrainer_LGCNDataset_5.356.pth
Epoch 576/1500, Loss: 0.027050, Time: 169.544s
Test result. Precision: 2.934%@20, 1.825%@100, Recall: 6.534%@20, 19.816%@100, NDCG: 5.354%@20, 9.957%@100, Time: 5.389s
Save model to checkpoints\LightGCN_BPRTrainer_LGCNDataset_5.354.pth
Epoch 577/1500, Loss: 0.026876, Time: 169.910s
Test result. Precision: 2.936%@20, 1.825%@100, Recall: 6.526%@20, 19.800%@100, NDCG: 5.354%@20, 9.955%@100, Time: 5.327s
Save model to checkpoints\LightGCN_BPRTrainer_LGCNDataset_5.354.pth
Epoch 578/1500, Loss: 0.027097, Time: 169.883s
Test result. Precision: 2.930%@20, 1.827%@100, Recall: 6.521%@20, 19.811%@100, NDCG: 5.356%@20, 9.964%@100, Time: 5.405s
Save model to checkpoints\LightGCN_BPRTrainer_LGCNDataset_5.356.pth
Epoch 579/1500, Loss: 0.027178, Time: 169.945s
Test result. Precision: 2.940%@20, 1.824%@100, Recall: 6.535%@20, 19.795%@100, NDCG: 5.365%@20, 9.958%@100, Time: 5.358s
Save model to checkpoints\LightGCN_BPRTrainer_LGCNDataset_5.365.pth
Epoch 580/1500, Loss: 0.027066, Time: 169.894s
Test result. Precision: 2.935%@20, 1.826%@100, Recall: 6.528%@20, 19.817%@100, NDCG: 5.359%@20, 9.963%@100, Time: 5.409s
Save model to checkpoints\LightGCN_BPRTrainer_LGCNDataset_5.359.pth
Epoch 581/1500, Loss: 0.026996, Time: 169.722s
Test result. Precision: 2.943%@20, 1.826%@100, Recall: 6.549%@20, 19.816%@100, NDCG: 5.372%@20, 9.969%@100, Time: 5.714s
Save model to checkpoints\LightGCN_BPRTrainer_LGCNDataset_5.372.pth
Epoch 582/1500, Loss: 0.027171, Time: 169.703s
Test result. Precision: 2.932%@20, 1.825%@100, Recall: 6.527%@20, 19.817%@100, NDCG: 5.360%@20, 9.965%@100, Time: 5.510s
Save model to checkpoints\LightGCN_BPRTrainer_LGCNDataset_5.360.pth
Epoch 583/1500, Loss: 0.027006, Time: 169.874s
Test result. Precision: 2.935%@20, 1.825%@100, Recall: 6.542%@20, 19.809%@100, NDCG: 5.359%@20, 9.959%@100, Time: 5.311s
Save model to checkpoints\LightGCN_BPRTrainer_LGCNDataset_5.359.pth
Epoch 584/1500, Loss: 0.027136, Time: 169.884s
Test result. Precision: 2.938%@20, 1.825%@100, Recall: 6.552%@20, 19.803%@100, NDCG: 5.361%@20, 9.954%@100, Time: 5.421s
Save model to checkpoints\LightGCN_BPRTrainer_LGCNDataset_5.361.pth
Epoch 585/1500, Loss: 0.027098, Time: 170.422s
Test result. Precision: 2.938%@20, 1.825%@100, Recall: 6.538%@20, 19.808%@100, NDCG: 5.353%@20, 9.950%@100, Time: 5.421s
Save model to checkpoints\LightGCN_BPRTrainer_LGCNDataset_5.353.pth
Epoch 586/1500, Loss: 0.027090, Time: 169.812s
Test result. Precision: 2.938%@20, 1.824%@100, Recall: 6.532%@20, 19.806%@100, NDCG: 5.352%@20, 9.950%@100, Time: 5.374s
Save model to checkpoints\LightGCN_BPRTrainer_LGCNDataset_5.352.pth
Epoch 587/1500, Loss: 0.027040, Time: 169.605s
Test result. Precision: 2.931%@20, 1.824%@100, Recall: 6.524%@20, 19.810%@100, NDCG: 5.346%@20, 9.950%@100, Time: 5.427s
Save model to checkpoints\LightGCN_BPRTrainer_LGCNDataset_5.346.pth
Epoch 588/1500, Loss: 0.026947, Time: 170.028s
Test result. Precision: 2.933%@20, 1.825%@100, Recall: 6.525%@20, 19.803%@100, NDCG: 5.349%@20, 9.951%@100, Time: 5.550s
Save model to checkpoints\LightGCN_BPRTrainer_LGCNDataset_5.349.pth
Epoch 589/1500, Loss: 0.027195, Time: 169.610s
Test result. Precision: 2.938%@20, 1.823%@100, Recall: 6.540%@20, 19.784%@100, NDCG: 5.366%@20, 9.956%@100, Time: 5.436s
Save model to checkpoints\LightGCN_BPRTrainer_LGCNDataset_5.366.pth
Epoch 590/1500, Loss: 0.027033, Time: 169.783s
Test result. Precision: 2.936%@20, 1.824%@100, Recall: 6.529%@20, 19.785%@100, NDCG: 5.362%@20, 9.958%@100, Time: 5.483s
Save model to checkpoints\LightGCN_BPRTrainer_LGCNDataset_5.362.pth
Epoch 591/1500, Loss: 0.027060, Time: 169.910s
Test result. Precision: 2.937%@20, 1.824%@100, Recall: 6.525%@20, 19.797%@100, NDCG: 5.359%@20, 9.960%@100, Time: 5.405s
Save model to checkpoints\LightGCN_BPRTrainer_LGCNDataset_5.359.pth
Epoch 592/1500, Loss: 0.027006, Time: 170.084s
Test result. Precision: 2.935%@20, 1.825%@100, Recall: 6.528%@20, 19.803%@100, NDCG: 5.355%@20, 9.960%@100, Time: 5.499s
Save model to checkpoints\LightGCN_BPRTrainer_LGCNDataset_5.355.pth
Epoch 593/1500, Loss: 0.026748, Time: 169.677s
Test result. Precision: 2.935%@20, 1.826%@100, Recall: 6.523%@20, 19.817%@100, NDCG: 5.355%@20, 9.964%@100, Time: 5.394s
Save model to checkpoints\LightGCN_BPRTrainer_LGCNDataset_5.355.pth
Epoch 594/1500, Loss: 0.026970, Time: 169.748s
Test result. Precision: 2.932%@20, 1.827%@100, Recall: 6.521%@20, 19.822%@100, NDCG: 5.350%@20, 9.963%@100, Time: 5.445s
Save model to checkpoints\LightGCN_BPRTrainer_LGCNDataset_5.350.pth
Epoch 595/1500, Loss: 0.027008, Time: 169.586s
Test result. Precision: 2.928%@20, 1.828%@100, Recall: 6.508%@20, 19.817%@100, NDCG: 5.343%@20, 9.961%@100, Time: 5.405s
Save model to checkpoints\LightGCN_BPRTrainer_LGCNDataset_5.343.pth
Epoch 596/1500, Loss: 0.026962, Time: 170.158s
Test result. Precision: 2.932%@20, 1.826%@100, Recall: 6.518%@20, 19.815%@100, NDCG: 5.353%@20, 9.966%@100, Time: 5.389s
Save model to checkpoints\LightGCN_BPRTrainer_LGCNDataset_5.353.pth
Epoch 597/1500, Loss: 0.026943, Time: 169.789s
Test result. Precision: 2.934%@20, 1.827%@100, Recall: 6.528%@20, 19.830%@100, NDCG: 5.362%@20, 9.975%@100, Time: 5.374s
Save model to checkpoints\LightGCN_BPRTrainer_LGCNDataset_5.362.pth
Epoch 598/1500, Loss: 0.026979, Time: 169.723s
Test result. Precision: 2.934%@20, 1.826%@100, Recall: 6.527%@20, 19.816%@100, NDCG: 5.361%@20, 9.969%@100, Time: 5.374s
Save model to checkpoints\LightGCN_BPRTrainer_LGCNDataset_5.361.pth
Epoch 599/1500, Loss: 0.026878, Time: 169.918s
Test result. Precision: 2.935%@20, 1.825%@100, Recall: 6.523%@20, 19.808%@100, NDCG: 5.357%@20, 9.962%@100, Time: 5.386s
Save model to checkpoints\LightGCN_BPRTrainer_LGCNDataset_5.357.pth
Epoch 600/1500, Loss: 0.027138, Time: 169.646s
Test result. Precision: 2.937%@20, 1.825%@100, Recall: 6.531%@20, 19.810%@100, NDCG: 5.353%@20, 9.955%@100, Time: 5.430s
Save model to checkpoints\LightGCN_BPRTrainer_LGCNDataset_5.353.pth
Epoch 601/1500, Loss: 0.027010, Time: 169.981s
Test result. Precision: 2.940%@20, 1.826%@100, Recall: 6.542%@20, 19.830%@100, NDCG: 5.359%@20, 9.963%@100, Time: 5.537s
Save model to checkpoints\LightGCN_BPRTrainer_LGCNDataset_5.359.pth
Epoch 602/1500, Loss: 0.027092, Time: 169.520s
Test result. Precision: 2.938%@20, 1.827%@100, Recall: 6.543%@20, 19.833%@100, NDCG: 5.363%@20, 9.970%@100, Time: 5.342s
Save model to checkpoints\LightGCN_BPRTrainer_LGCNDataset_5.363.pth
Epoch 603/1500, Loss: 0.026951, Time: 169.979s
Test result. Precision: 2.942%@20, 1.827%@100, Recall: 6.542%@20, 19.824%@100, NDCG: 5.359%@20, 9.962%@100, Time: 5.530s
Save model to checkpoints\LightGCN_BPRTrainer_LGCNDataset_5.359.pth
Epoch 604/1500, Loss: 0.026715, Time: 169.744s
Test result. Precision: 2.940%@20, 1.826%@100, Recall: 6.539%@20, 19.814%@100, NDCG: 5.357%@20, 9.959%@100, Time: 5.389s
Save model to checkpoints\LightGCN_BPRTrainer_LGCNDataset_5.357.pth
Epoch 605/1500, Loss: 0.026862, Time: 169.716s
Test result. Precision: 2.941%@20, 1.828%@100, Recall: 6.542%@20, 19.833%@100, NDCG: 5.358%@20, 9.965%@100, Time: 5.342s
Save model to checkpoints\LightGCN_BPRTrainer_LGCNDataset_5.358.pth
Epoch 606/1500, Loss: 0.026929, Time: 169.844s
Test result. Precision: 2.945%@20, 1.829%@100, Recall: 6.550%@20, 19.849%@100, NDCG: 5.362%@20, 9.969%@100, Time: 5.410s
Save model to checkpoints\LightGCN_BPRTrainer_LGCNDataset_5.362.pth
Epoch 607/1500, Loss: 0.026690, Time: 169.631s
Test result. Precision: 2.951%@20, 1.830%@100, Recall: 6.563%@20, 19.844%@100, NDCG: 5.371%@20, 9.972%@100, Time: 5.511s
Save model to checkpoints\LightGCN_BPRTrainer_LGCNDataset_5.371.pth
Epoch 608/1500, Loss: 0.026675, Time: 169.622s
Test result. Precision: 2.943%@20, 1.828%@100, Recall: 6.547%@20, 19.827%@100, NDCG: 5.359%@20, 9.960%@100, Time: 5.389s
Save model to checkpoints\LightGCN_BPRTrainer_LGCNDataset_5.359.pth
Epoch 609/1500, Loss: 0.026883, Time: 169.852s
Test result. Precision: 2.942%@20, 1.829%@100, Recall: 6.552%@20, 19.832%@100, NDCG: 5.361%@20, 9.964%@100, Time: 5.452s
Save model to checkpoints\LightGCN_BPRTrainer_LGCNDataset_5.361.pth
Epoch 610/1500, Loss: 0.026997, Time: 169.909s
Test result. Precision: 2.949%@20, 1.828%@100, Recall: 6.561%@20, 19.832%@100, NDCG: 5.374%@20, 9.972%@100, Time: 5.374s
Save model to checkpoints\LightGCN_BPRTrainer_LGCNDataset_5.374.pth
Epoch 611/1500, Loss: 0.027026, Time: 170.114s
Test result. Precision: 2.940%@20, 1.828%@100, Recall: 6.547%@20, 19.828%@100, NDCG: 5.362%@20, 9.966%@100, Time: 5.452s
Save model to checkpoints\LightGCN_BPRTrainer_LGCNDataset_5.362.pth
Epoch 612/1500, Loss: 0.026735, Time: 169.534s
Test result. Precision: 2.943%@20, 1.827%@100, Recall: 6.538%@20, 19.824%@100, NDCG: 5.361%@20, 9.963%@100, Time: 5.483s
Save model to checkpoints\LightGCN_BPRTrainer_LGCNDataset_5.361.pth
Epoch 613/1500, Loss: 0.027017, Time: 169.601s
Test result. Precision: 2.934%@20, 1.827%@100, Recall: 6.547%@20, 19.832%@100, NDCG: 5.359%@20, 9.965%@100, Time: 5.440s
Save model to checkpoints\LightGCN_BPRTrainer_LGCNDataset_5.359.pth
Epoch 614/1500, Loss: 0.026821, Time: 170.207s
Test result. Precision: 2.943%@20, 1.828%@100, Recall: 6.561%@20, 19.835%@100, NDCG: 5.368%@20, 9.967%@100, Time: 5.546s
Save model to checkpoints\LightGCN_BPRTrainer_LGCNDataset_5.368.pth
Epoch 615/1500, Loss: 0.026739, Time: 169.692s
Test result. Precision: 2.943%@20, 1.829%@100, Recall: 6.550%@20, 19.833%@100, NDCG: 5.366%@20, 9.969%@100, Time: 5.374s
Save model to checkpoints\LightGCN_BPRTrainer_LGCNDataset_5.366.pth
Epoch 616/1500, Loss: 0.027007, Time: 170.050s
Test result. Precision: 2.942%@20, 1.828%@100, Recall: 6.544%@20, 19.814%@100, NDCG: 5.364%@20, 9.963%@100, Time: 5.374s
Save model to checkpoints\LightGCN_BPRTrainer_LGCNDataset_5.364.pth
Epoch 617/1500, Loss: 0.026856, Time: 169.948s
Test result. Precision: 2.931%@20, 1.828%@100, Recall: 6.518%@20, 19.818%@100, NDCG: 5.345%@20, 9.957%@100, Time: 5.452s
Save model to checkpoints\LightGCN_BPRTrainer_LGCNDataset_5.345.pth
Epoch 618/1500, Loss: 0.026725, Time: 169.823s
Test result. Precision: 2.943%@20, 1.828%@100, Recall: 6.544%@20, 19.810%@100, NDCG: 5.361%@20, 9.958%@100, Time: 5.359s
Save model to checkpoints\LightGCN_BPRTrainer_LGCNDataset_5.361.pth
Epoch 619/1500, Loss: 0.026805, Time: 170.097s
Test result. Precision: 2.939%@20, 1.827%@100, Recall: 6.538%@20, 19.816%@100, NDCG: 5.359%@20, 9.960%@100, Time: 5.532s
Save model to checkpoints\LightGCN_BPRTrainer_LGCNDataset_5.359.pth
Epoch 620/1500, Loss: 0.026980, Time: 169.587s
Test result. Precision: 2.939%@20, 1.826%@100, Recall: 6.537%@20, 19.799%@100, NDCG: 5.359%@20, 9.957%@100, Time: 5.436s
Save model to checkpoints\LightGCN_BPRTrainer_LGCNDataset_5.359.pth
Epoch 621/1500, Loss: 0.026985, Time: 169.788s
Test result. Precision: 2.937%@20, 1.825%@100, Recall: 6.540%@20, 19.796%@100, NDCG: 5.356%@20, 9.952%@100, Time: 5.514s
Save model to checkpoints\LightGCN_BPRTrainer_LGCNDataset_5.356.pth
Epoch 622/1500, Loss: 0.026841, Time: 169.629s
Test result. Precision: 2.940%@20, 1.826%@100, Recall: 6.548%@20, 19.799%@100, NDCG: 5.366%@20, 9.961%@100, Time: 5.405s
Save model to checkpoints\LightGCN_BPRTrainer_LGCNDataset_5.366.pth
Epoch 623/1500, Loss: 0.026947, Time: 170.594s
Test result. Precision: 2.941%@20, 1.828%@100, Recall: 6.542%@20, 19.830%@100, NDCG: 5.362%@20, 9.967%@100, Time: 5.436s
Save model to checkpoints\LightGCN_BPRTrainer_LGCNDataset_5.362.pth
Epoch 624/1500, Loss: 0.027061, Time: 169.832s
Test result. Precision: 2.943%@20, 1.829%@100, Recall: 6.547%@20, 19.833%@100, NDCG: 5.364%@20, 9.968%@100, Time: 5.389s
Save model to checkpoints\LightGCN_BPRTrainer_LGCNDataset_5.364.pth
Epoch 625/1500, Loss: 0.026996, Time: 170.163s
Test result. Precision: 2.937%@20, 1.829%@100, Recall: 6.532%@20, 19.822%@100, NDCG: 5.356%@20, 9.964%@100, Time: 5.421s
Save model to checkpoints\LightGCN_BPRTrainer_LGCNDataset_5.356.pth
Epoch 626/1500, Loss: 0.026844, Time: 169.721s
Test result. Precision: 2.943%@20, 1.827%@100, Recall: 6.549%@20, 19.808%@100, NDCG: 5.361%@20, 9.956%@100, Time: 5.448s
Save model to checkpoints\LightGCN_BPRTrainer_LGCNDataset_5.361.pth
Epoch 627/1500, Loss: 0.027057, Time: 170.424s
Test result. Precision: 2.940%@20, 1.826%@100, Recall: 6.542%@20, 19.797%@100, NDCG: 5.362%@20, 9.957%@100, Time: 5.530s
Save model to checkpoints\LightGCN_BPRTrainer_LGCNDataset_5.362.pth
Epoch 628/1500, Loss: 0.026863, Time: 169.898s
Test result. Precision: 2.936%@20, 1.827%@100, Recall: 6.535%@20, 19.808%@100, NDCG: 5.359%@20, 9.962%@100, Time: 5.342s
Save model to checkpoints\LightGCN_BPRTrainer_LGCNDataset_5.359.pth
Epoch 629/1500, Loss: 0.026896, Time: 169.827s
Test result. Precision: 2.937%@20, 1.827%@100, Recall: 6.536%@20, 19.819%@100, NDCG: 5.355%@20, 9.960%@100, Time: 5.421s
Save model to checkpoints\LightGCN_BPRTrainer_LGCNDataset_5.355.pth
Epoch 630/1500, Loss: 0.026833, Time: 170.197s
Test result. Precision: 2.945%@20, 1.825%@100, Recall: 6.554%@20, 19.796%@100, NDCG: 5.357%@20, 9.946%@100, Time: 5.565s
Save model to checkpoints\LightGCN_BPRTrainer_LGCNDataset_5.357.pth
Epoch 631/1500, Loss: 0.026787, Time: 170.036s
Test result. Precision: 2.938%@20, 1.825%@100, Recall: 6.545%@20, 19.797%@100, NDCG: 5.355%@20, 9.950%@100, Time: 5.531s
Save model to checkpoints\LightGCN_BPRTrainer_LGCNDataset_5.355.pth
Epoch 632/1500, Loss: 0.026774, Time: 171.591s
Test result. Precision: 2.937%@20, 1.824%@100, Recall: 6.540%@20, 19.778%@100, NDCG: 5.351%@20, 9.940%@100, Time: 5.467s
Save model to checkpoints\LightGCN_BPRTrainer_LGCNDataset_5.351.pth
Epoch 633/1500, Loss: 0.026869, Time: 169.837s
Test result. Precision: 2.933%@20, 1.822%@100, Recall: 6.544%@20, 19.766%@100, NDCG: 5.349%@20, 9.935%@100, Time: 5.546s
Save model to checkpoints\LightGCN_BPRTrainer_LGCNDataset_5.349.pth
Epoch 634/1500, Loss: 0.026835, Time: 171.288s
Test result. Precision: 2.943%@20, 1.824%@100, Recall: 6.570%@20, 19.785%@100, NDCG: 5.368%@20, 9.949%@100, Time: 5.467s
Save model to checkpoints\LightGCN_BPRTrainer_LGCNDataset_5.368.pth
Epoch 635/1500, Loss: 0.026693, Time: 170.081s
Test result. Precision: 2.945%@20, 1.824%@100, Recall: 6.571%@20, 19.792%@100, NDCG: 5.369%@20, 9.951%@100, Time: 5.421s
Save model to checkpoints\LightGCN_BPRTrainer_LGCNDataset_5.369.pth
Epoch 636/1500, Loss: 0.026799, Time: 170.391s
Test result. Precision: 2.949%@20, 1.824%@100, Recall: 6.579%@20, 19.788%@100, NDCG: 5.367%@20, 9.945%@100, Time: 5.467s
Save model to checkpoints\LightGCN_BPRTrainer_LGCNDataset_5.367.pth
Epoch 637/1500, Loss: 0.026515, Time: 170.557s
Test result. Precision: 2.950%@20, 1.825%@100, Recall: 6.583%@20, 19.801%@100, NDCG: 5.377%@20, 9.957%@100, Time: 5.389s
Save model to checkpoints\LightGCN_BPRTrainer_LGCNDataset_5.377.pth
Epoch 638/1500, Loss: 0.026678, Time: 169.429s
Test result. Precision: 2.950%@20, 1.825%@100, Recall: 6.572%@20, 19.797%@100, NDCG: 5.376%@20, 9.958%@100, Time: 5.405s
Save model to checkpoints\LightGCN_BPRTrainer_LGCNDataset_5.376.pth
Epoch 639/1500, Loss: 0.026918, Time: 169.778s
Test result. Precision: 2.940%@20, 1.823%@100, Recall: 6.548%@20, 19.772%@100, NDCG: 5.365%@20, 9.950%@100, Time: 5.358s
Save model to checkpoints\LightGCN_BPRTrainer_LGCNDataset_5.365.pth
Epoch 640/1500, Loss: 0.026810, Time: 170.342s
Test result. Precision: 2.944%@20, 1.822%@100, Recall: 6.553%@20, 19.766%@100, NDCG: 5.365%@20, 9.946%@100, Time: 5.561s
Save model to checkpoints\LightGCN_BPRTrainer_LGCNDataset_5.365.pth
Epoch 641/1500, Loss: 0.026791, Time: 169.865s
Test result. Precision: 2.947%@20, 1.824%@100, Recall: 6.565%@20, 19.797%@100, NDCG: 5.371%@20, 9.956%@100, Time: 5.405s
Save model to checkpoints\LightGCN_BPRTrainer_LGCNDataset_5.371.pth
Epoch 642/1500, Loss: 0.026473, Time: 170.298s
Test result. Precision: 2.946%@20, 1.825%@100, Recall: 6.558%@20, 19.808%@100, NDCG: 5.370%@20, 9.961%@100, Time: 5.499s
Save model to checkpoints\LightGCN_BPRTrainer_LGCNDataset_5.370.pth
Epoch 643/1500, Loss: 0.026731, Time: 170.588s
Test result. Precision: 2.944%@20, 1.827%@100, Recall: 6.555%@20, 19.819%@100, NDCG: 5.365%@20, 9.960%@100, Time: 5.577s
Save model to checkpoints\LightGCN_BPRTrainer_LGCNDataset_5.365.pth
Epoch 644/1500, Loss: 0.026792, Time: 170.781s
Test result. Precision: 2.949%@20, 1.824%@100, Recall: 6.566%@20, 19.793%@100, NDCG: 5.377%@20, 9.960%@100, Time: 5.717s
Save model to checkpoints\LightGCN_BPRTrainer_LGCNDataset_5.377.pth
Epoch 645/1500, Loss: 0.026797, Time: 169.538s
Test result. Precision: 2.950%@20, 1.825%@100, Recall: 6.563%@20, 19.815%@100, NDCG: 5.377%@20, 9.965%@100, Time: 5.421s
Save model to checkpoints\LightGCN_BPRTrainer_LGCNDataset_5.377.pth
Epoch 646/1500, Loss: 0.026662, Time: 169.418s
Test result. Precision: 2.947%@20, 1.824%@100, Recall: 6.559%@20, 19.798%@100, NDCG: 5.380%@20, 9.966%@100, Time: 5.421s
Save model to checkpoints\LightGCN_BPRTrainer_LGCNDataset_5.380.pth
Epoch 647/1500, Loss: 0.026929, Time: 169.944s
Test result. Precision: 2.943%@20, 1.826%@100, Recall: 6.551%@20, 19.809%@100, NDCG: 5.377%@20, 9.971%@100, Time: 5.436s
Save model to checkpoints\LightGCN_BPRTrainer_LGCNDataset_5.377.pth
Epoch 648/1500, Loss: 0.026712, Time: 169.507s
Test result. Precision: 2.946%@20, 1.827%@100, Recall: 6.566%@20, 19.820%@100, NDCG: 5.379%@20, 9.971%@100, Time: 5.358s
Save model to checkpoints\LightGCN_BPRTrainer_LGCNDataset_5.379.pth
Epoch 649/1500, Loss: 0.026790, Time: 169.360s
Test result. Precision: 2.946%@20, 1.823%@100, Recall: 6.559%@20, 19.782%@100, NDCG: 5.373%@20, 9.955%@100, Time: 5.311s
Save model to checkpoints\LightGCN_BPRTrainer_LGCNDataset_5.373.pth
Epoch 650/1500, Loss: 0.026690, Time: 169.375s
Test result. Precision: 2.951%@20, 1.825%@100, Recall: 6.561%@20, 19.798%@100, NDCG: 5.379%@20, 9.963%@100, Time: 5.530s
Save model to checkpoints\LightGCN_BPRTrainer_LGCNDataset_5.379.pth
Epoch 651/1500, Loss: 0.026424, Time: 169.460s
Test result. Precision: 2.949%@20, 1.827%@100, Recall: 6.559%@20, 19.811%@100, NDCG: 5.377%@20, 9.967%@100, Time: 5.499s
Save model to checkpoints\LightGCN_BPRTrainer_LGCNDataset_5.377.pth
Epoch 652/1500, Loss: 0.026632, Time: 169.643s
Test result. Precision: 2.952%@20, 1.825%@100, Recall: 6.554%@20, 19.796%@100, NDCG: 5.372%@20, 9.956%@100, Time: 5.592s
Save model to checkpoints\LightGCN_BPRTrainer_LGCNDataset_5.372.pth
Epoch 653/1500, Loss: 0.026659, Time: 169.335s
Test result. Precision: 2.947%@20, 1.827%@100, Recall: 6.547%@20, 19.814%@100, NDCG: 5.370%@20, 9.966%@100, Time: 5.436s
Save model to checkpoints\LightGCN_BPRTrainer_LGCNDataset_5.370.pth
Epoch 654/1500, Loss: 0.026826, Time: 169.367s
Test result. Precision: 2.945%@20, 1.829%@100, Recall: 6.545%@20, 19.844%@100, NDCG: 5.370%@20, 9.976%@100, Time: 5.311s
Save model to checkpoints\LightGCN_BPRTrainer_LGCNDataset_5.370.pth
Epoch 655/1500, Loss: 0.026710, Time: 169.969s
Test result. Precision: 2.943%@20, 1.828%@100, Recall: 6.539%@20, 19.840%@100, NDCG: 5.368%@20, 9.974%@100, Time: 5.389s
Save model to checkpoints\LightGCN_BPRTrainer_LGCNDataset_5.368.pth
Epoch 656/1500, Loss: 0.026712, Time: 169.845s
Test result. Precision: 2.943%@20, 1.833%@100, Recall: 6.544%@20, 19.873%@100, NDCG: 5.369%@20, 9.986%@100, Time: 5.389s
Save model to checkpoints\LightGCN_BPRTrainer_LGCNDataset_5.369.pth
Epoch 657/1500, Loss: 0.026767, Time: 169.693s
Test result. Precision: 2.946%@20, 1.830%@100, Recall: 6.552%@20, 19.854%@100, NDCG: 5.377%@20, 9.985%@100, Time: 5.389s
Save model to checkpoints\LightGCN_BPRTrainer_LGCNDataset_5.377.pth
Epoch 658/1500, Loss: 0.026666, Time: 169.720s
Test result. Precision: 2.951%@20, 1.832%@100, Recall: 6.559%@20, 19.867%@100, NDCG: 5.384%@20, 9.992%@100, Time: 5.553s
Save model to checkpoints\LightGCN_BPRTrainer_LGCNDataset_5.384.pth
Epoch 659/1500, Loss: 0.026746, Time: 169.898s
Test result. Precision: 2.952%@20, 1.829%@100, Recall: 6.553%@20, 19.856%@100, NDCG: 5.388%@20, 9.992%@100, Time: 5.374s
Save model to checkpoints\LightGCN_BPRTrainer_LGCNDataset_5.388.pth
Epoch 660/1500, Loss: 0.026733, Time: 169.898s
Test result. Precision: 2.959%@20, 1.831%@100, Recall: 6.579%@20, 19.862%@100, NDCG: 5.395%@20, 9.992%@100, Time: 5.358s
Save model to checkpoints\LightGCN_BPRTrainer_LGCNDataset_5.395.pth
Epoch 661/1500, Loss: 0.026407, Time: 169.923s
Test result. Precision: 2.949%@20, 1.832%@100, Recall: 6.560%@20, 19.878%@100, NDCG: 5.387%@20, 9.999%@100, Time: 5.483s
Save model to checkpoints\LightGCN_BPRTrainer_LGCNDataset_5.387.pth
Epoch 662/1500, Loss: 0.026634, Time: 170.148s
Test result. Precision: 2.947%@20, 1.828%@100, Recall: 6.551%@20, 19.841%@100, NDCG: 5.382%@20, 9.986%@100, Time: 5.436s
Save model to checkpoints\LightGCN_BPRTrainer_LGCNDataset_5.382.pth
Epoch 663/1500, Loss: 0.026645, Time: 169.695s
Test result. Precision: 2.948%@20, 1.831%@100, Recall: 6.566%@20, 19.863%@100, NDCG: 5.387%@20, 9.994%@100, Time: 5.374s
Save model to checkpoints\LightGCN_BPRTrainer_LGCNDataset_5.387.pth
Epoch 664/1500, Loss: 0.026571, Time: 170.241s
Test result. Precision: 2.964%@20, 1.829%@100, Recall: 6.592%@20, 19.849%@100, NDCG: 5.403%@20, 9.992%@100, Time: 5.396s
Save model to checkpoints\LightGCN_BPRTrainer_LGCNDataset_5.403.pth
Epoch 665/1500, Loss: 0.026597, Time: 170.061s
Test result. Precision: 2.957%@20, 1.828%@100, Recall: 6.578%@20, 19.829%@100, NDCG: 5.398%@20, 9.987%@100, Time: 5.436s
Save model to checkpoints\LightGCN_BPRTrainer_LGCNDataset_5.398.pth
Epoch 666/1500, Loss: 0.026684, Time: 169.882s
Test result. Precision: 2.955%@20, 1.827%@100, Recall: 6.571%@20, 19.811%@100, NDCG: 5.400%@20, 9.987%@100, Time: 5.467s
Save model to checkpoints\LightGCN_BPRTrainer_LGCNDataset_5.400.pth
Epoch 667/1500, Loss: 0.026757, Time: 170.447s
Test result. Precision: 2.951%@20, 1.830%@100, Recall: 6.573%@20, 19.841%@100, NDCG: 5.396%@20, 9.994%@100, Time: 5.452s
Save model to checkpoints\LightGCN_BPRTrainer_LGCNDataset_5.396.pth
Epoch 668/1500, Loss: 0.026569, Time: 171.068s
Test result. Precision: 2.947%@20, 1.829%@100, Recall: 6.563%@20, 19.827%@100, NDCG: 5.379%@20, 9.979%@100, Time: 5.427s
Save model to checkpoints\LightGCN_BPRTrainer_LGCNDataset_5.379.pth
Epoch 669/1500, Loss: 0.026761, Time: 170.598s
Test result. Precision: 2.950%@20, 1.830%@100, Recall: 6.572%@20, 19.841%@100, NDCG: 5.383%@20, 9.984%@100, Time: 5.606s
Save model to checkpoints\LightGCN_BPRTrainer_LGCNDataset_5.383.pth
Epoch 670/1500, Loss: 0.026622, Time: 170.577s
Test result. Precision: 2.947%@20, 1.828%@100, Recall: 6.557%@20, 19.825%@100, NDCG: 5.379%@20, 9.980%@100, Time: 5.374s
Save model to checkpoints\LightGCN_BPRTrainer_LGCNDataset_5.379.pth
Epoch 671/1500, Loss: 0.026456, Time: 170.529s
Test result. Precision: 2.948%@20, 1.827%@100, Recall: 6.564%@20, 19.815%@100, NDCG: 5.378%@20, 9.972%@100, Time: 5.608s
Save model to checkpoints\LightGCN_BPRTrainer_LGCNDataset_5.378.pth
Epoch 672/1500, Loss: 0.026777, Time: 169.680s
Test result. Precision: 2.941%@20, 1.827%@100, Recall: 6.547%@20, 19.810%@100, NDCG: 5.363%@20, 9.965%@100, Time: 5.443s
Save model to checkpoints\LightGCN_BPRTrainer_LGCNDataset_5.363.pth
Epoch 673/1500, Loss: 0.026731, Time: 169.538s
Test result. Precision: 2.951%@20, 1.828%@100, Recall: 6.561%@20, 19.808%@100, NDCG: 5.370%@20, 9.962%@100, Time: 5.526s
Save model to checkpoints\LightGCN_BPRTrainer_LGCNDataset_5.370.pth
Epoch 674/1500, Loss: 0.026554, Time: 170.035s
Test result. Precision: 2.954%@20, 1.826%@100, Recall: 6.577%@20, 19.810%@100, NDCG: 5.378%@20, 9.963%@100, Time: 5.424s
Save model to checkpoints\LightGCN_BPRTrainer_LGCNDataset_5.378.pth
Epoch 675/1500, Loss: 0.026860, Time: 169.653s
Test result. Precision: 2.952%@20, 1.826%@100, Recall: 6.564%@20, 19.790%@100, NDCG: 5.370%@20, 9.955%@100, Time: 5.374s
Save model to checkpoints\LightGCN_BPRTrainer_LGCNDataset_5.370.pth
Epoch 676/1500, Loss: 0.026802, Time: 169.555s
Test result. Precision: 2.957%@20, 1.828%@100, Recall: 6.580%@20, 19.822%@100, NDCG: 5.376%@20, 9.965%@100, Time: 5.389s
Save model to checkpoints\LightGCN_BPRTrainer_LGCNDataset_5.376.pth
Epoch 677/1500, Loss: 0.026671, Time: 169.775s
Test result. Precision: 2.962%@20, 1.829%@100, Recall: 6.589%@20, 19.842%@100, NDCG: 5.385%@20, 9.975%@100, Time: 5.358s
Save model to checkpoints\LightGCN_BPRTrainer_LGCNDataset_5.385.pth
Epoch 678/1500, Loss: 0.026786, Time: 170.183s
Test result. Precision: 2.963%@20, 1.830%@100, Recall: 6.585%@20, 19.847%@100, NDCG: 5.390%@20, 9.983%@100, Time: 5.548s
Save model to checkpoints\LightGCN_BPRTrainer_LGCNDataset_5.390.pth
Epoch 679/1500, Loss: 0.026500, Time: 170.182s
Test result. Precision: 2.951%@20, 1.827%@100, Recall: 6.562%@20, 19.814%@100, NDCG: 5.378%@20, 9.971%@100, Time: 5.499s
Save model to checkpoints\LightGCN_BPRTrainer_LGCNDataset_5.378.pth
Epoch 680/1500, Loss: 0.026592, Time: 169.501s
Test result. Precision: 2.962%@20, 1.829%@100, Recall: 6.587%@20, 19.823%@100, NDCG: 5.389%@20, 9.976%@100, Time: 5.408s
Save model to checkpoints\LightGCN_BPRTrainer_LGCNDataset_5.389.pth
Epoch 681/1500, Loss: 0.026567, Time: 169.765s
Test result. Precision: 2.958%@20, 1.829%@100, Recall: 6.578%@20, 19.831%@100, NDCG: 5.381%@20, 9.973%@100, Time: 5.452s
Save model to checkpoints\LightGCN_BPRTrainer_LGCNDataset_5.381.pth
Epoch 682/1500, Loss: 0.026661, Time: 170.031s
Test result. Precision: 2.965%@20, 1.831%@100, Recall: 6.586%@20, 19.836%@100, NDCG: 5.390%@20, 9.983%@100, Time: 5.439s
Save model to checkpoints\LightGCN_BPRTrainer_LGCNDataset_5.390.pth
Epoch 683/1500, Loss: 0.026480, Time: 170.057s
Test result. Precision: 2.962%@20, 1.830%@100, Recall: 6.581%@20, 19.833%@100, NDCG: 5.387%@20, 9.978%@100, Time: 5.483s
Save model to checkpoints\LightGCN_BPRTrainer_LGCNDataset_5.387.pth
Epoch 684/1500, Loss: 0.026575, Time: 170.199s
Test result. Precision: 2.948%@20, 1.830%@100, Recall: 6.548%@20, 19.845%@100, NDCG: 5.374%@20, 9.982%@100, Time: 5.467s
Save model to checkpoints\LightGCN_BPRTrainer_LGCNDataset_5.374.pth
Epoch 685/1500, Loss: 0.026700, Time: 169.852s
Test result. Precision: 2.953%@20, 1.829%@100, Recall: 6.568%@20, 19.846%@100, NDCG: 5.381%@20, 9.980%@100, Time: 5.460s
Save model to checkpoints\LightGCN_BPRTrainer_LGCNDataset_5.381.pth
Epoch 686/1500, Loss: 0.026638, Time: 170.496s
Test result. Precision: 2.957%@20, 1.829%@100, Recall: 6.574%@20, 19.831%@100, NDCG: 5.390%@20, 9.984%@100, Time: 5.535s
Save model to checkpoints\LightGCN_BPRTrainer_LGCNDataset_5.390.pth
Epoch 687/1500, Loss: 0.026671, Time: 170.314s
Test result. Precision: 2.960%@20, 1.831%@100, Recall: 6.583%@20, 19.861%@100, NDCG: 5.396%@20, 9.995%@100, Time: 5.702s
Save model to checkpoints\LightGCN_BPRTrainer_LGCNDataset_5.396.pth
Epoch 688/1500, Loss: 0.026530, Time: 170.153s
Test result. Precision: 2.958%@20, 1.832%@100, Recall: 6.575%@20, 19.866%@100, NDCG: 5.397%@20, 10.000%@100, Time: 5.436s
Save model to checkpoints\LightGCN_BPRTrainer_LGCNDataset_5.397.pth
Epoch 689/1500, Loss: 0.026483, Time: 170.773s
Test result. Precision: 2.956%@20, 1.832%@100, Recall: 6.572%@20, 19.871%@100, NDCG: 5.391%@20, 9.996%@100, Time: 5.655s
Save model to checkpoints\LightGCN_BPRTrainer_LGCNDataset_5.391.pth
Epoch 690/1500, Loss: 0.026457, Time: 170.382s
Test result. Precision: 2.959%@20, 1.834%@100, Recall: 6.569%@20, 19.900%@100, NDCG: 5.389%@20, 10.003%@100, Time: 5.452s
Save model to checkpoints\LightGCN_BPRTrainer_LGCNDataset_5.389.pth
Epoch 691/1500, Loss: 0.026624, Time: 170.172s
Test result. Precision: 2.956%@20, 1.833%@100, Recall: 6.565%@20, 19.889%@100, NDCG: 5.385%@20, 10.000%@100, Time: 5.436s
Save model to checkpoints\LightGCN_BPRTrainer_LGCNDataset_5.385.pth
Epoch 692/1500, Loss: 0.026334, Time: 170.261s
Test result. Precision: 2.948%@20, 1.833%@100, Recall: 6.547%@20, 19.877%@100, NDCG: 5.378%@20, 9.996%@100, Time: 5.634s
Save model to checkpoints\LightGCN_BPRTrainer_LGCNDataset_5.378.pth
Epoch 693/1500, Loss: 0.026515, Time: 169.648s
Test result. Precision: 2.949%@20, 1.831%@100, Recall: 6.539%@20, 19.851%@100, NDCG: 5.375%@20, 9.989%@100, Time: 5.613s
Save model to checkpoints\LightGCN_BPRTrainer_LGCNDataset_5.375.pth
Epoch 694/1500, Loss: 0.026605, Time: 169.675s
Test result. Precision: 2.957%@20, 1.830%@100, Recall: 6.563%@20, 19.850%@100, NDCG: 5.379%@20, 9.982%@100, Time: 5.389s
Save model to checkpoints\LightGCN_BPRTrainer_LGCNDataset_5.379.pth
Epoch 695/1500, Loss: 0.026344, Time: 169.961s
Test result. Precision: 2.953%@20, 1.830%@100, Recall: 6.561%@20, 19.846%@100, NDCG: 5.379%@20, 9.983%@100, Time: 5.389s
Save model to checkpoints\LightGCN_BPRTrainer_LGCNDataset_5.379.pth
Epoch 696/1500, Loss: 0.026774, Time: 170.434s
Test result. Precision: 2.954%@20, 1.830%@100, Recall: 6.563%@20, 19.860%@100, NDCG: 5.380%@20, 9.985%@100, Time: 5.459s
Save model to checkpoints\LightGCN_BPRTrainer_LGCNDataset_5.380.pth
Epoch 697/1500, Loss: 0.026424, Time: 170.050s
Test result. Precision: 2.951%@20, 1.832%@100, Recall: 6.558%@20, 19.867%@100, NDCG: 5.380%@20, 9.991%@100, Time: 5.577s
Save model to checkpoints\LightGCN_BPRTrainer_LGCNDataset_5.380.pth
Epoch 698/1500, Loss: 0.026722, Time: 170.362s
Test result. Precision: 2.956%@20, 1.832%@100, Recall: 6.570%@20, 19.863%@100, NDCG: 5.383%@20, 9.988%@100, Time: 5.686s
Save model to checkpoints\LightGCN_BPRTrainer_LGCNDataset_5.383.pth
Epoch 699/1500, Loss: 0.026544, Time: 171.083s
Test result. Precision: 2.962%@20, 1.831%@100, Recall: 6.578%@20, 19.863%@100, NDCG: 5.388%@20, 9.987%@100, Time: 5.429s
Save model to checkpoints\LightGCN_BPRTrainer_LGCNDataset_5.388.pth
Epoch 700/1500, Loss: 0.026695, Time: 169.813s
Test result. Precision: 2.955%@20, 1.831%@100, Recall: 6.562%@20, 19.858%@100, NDCG: 5.380%@20, 9.985%@100, Time: 5.658s
Save model to checkpoints\LightGCN_BPRTrainer_LGCNDataset_5.380.pth
Epoch 701/1500, Loss: 0.026659, Time: 170.230s
Test result. Precision: 2.946%@20, 1.831%@100, Recall: 6.551%@20, 19.862%@100, NDCG: 5.373%@20, 9.985%@100, Time: 5.499s
Save model to checkpoints\LightGCN_BPRTrainer_LGCNDataset_5.373.pth
Epoch 702/1500, Loss: 0.026477, Time: 169.898s
Test result. Precision: 2.952%@20, 1.833%@100, Recall: 6.570%@20, 19.892%@100, NDCG: 5.386%@20, 10.000%@100, Time: 5.452s
Save model to checkpoints\LightGCN_BPRTrainer_LGCNDataset_5.386.pth
Epoch 703/1500, Loss: 0.026453, Time: 170.788s
Test result. Precision: 2.954%@20, 1.833%@100, Recall: 6.577%@20, 19.882%@100, NDCG: 5.385%@20, 9.994%@100, Time: 5.452s
Save model to checkpoints\LightGCN_BPRTrainer_LGCNDataset_5.385.pth
Epoch 704/1500, Loss: 0.026671, Time: 170.951s
Test result. Precision: 2.955%@20, 1.833%@100, Recall: 6.577%@20, 19.882%@100, NDCG: 5.382%@20, 9.991%@100, Time: 5.561s
Save model to checkpoints\LightGCN_BPRTrainer_LGCNDataset_5.382.pth
Epoch 705/1500, Loss: 0.026575, Time: 171.085s
Test result. Precision: 2.959%@20, 1.833%@100, Recall: 6.586%@20, 19.881%@100, NDCG: 5.388%@20, 9.994%@100, Time: 5.530s
Save model to checkpoints\LightGCN_BPRTrainer_LGCNDataset_5.388.pth
Epoch 706/1500, Loss: 0.026746, Time: 171.304s
Test result. Precision: 2.964%@20, 1.833%@100, Recall: 6.598%@20, 19.890%@100, NDCG: 5.396%@20, 9.997%@100, Time: 5.426s
Save model to checkpoints\LightGCN_BPRTrainer_LGCNDataset_5.396.pth
Epoch 707/1500, Loss: 0.026201, Time: 170.848s
Test result. Precision: 2.955%@20, 1.831%@100, Recall: 6.579%@20, 19.861%@100, NDCG: 5.381%@20, 9.982%@100, Time: 5.450s
Save model to checkpoints\LightGCN_BPRTrainer_LGCNDataset_5.381.pth
Epoch 708/1500, Loss: 0.026546, Time: 170.463s
Test result. Precision: 2.955%@20, 1.832%@100, Recall: 6.582%@20, 19.878%@100, NDCG: 5.383%@20, 9.989%@100, Time: 5.482s
Save model to checkpoints\LightGCN_BPRTrainer_LGCNDataset_5.383.pth
Epoch 709/1500, Loss: 0.026439, Time: 170.212s
Test result. Precision: 2.959%@20, 1.831%@100, Recall: 6.581%@20, 19.853%@100, NDCG: 5.381%@20, 9.978%@100, Time: 5.452s
Save model to checkpoints\LightGCN_BPRTrainer_LGCNDataset_5.381.pth
Epoch 710/1500, Loss: 0.026671, Time: 171.611s
Test result. Precision: 2.948%@20, 1.831%@100, Recall: 6.564%@20, 19.851%@100, NDCG: 5.372%@20, 9.977%@100, Time: 5.405s
Save model to checkpoints\LightGCN_BPRTrainer_LGCNDataset_5.372.pth
Epoch 711/1500, Loss: 0.026463, Time: 171.670s
Test result. Precision: 2.952%@20, 1.833%@100, Recall: 6.567%@20, 19.875%@100, NDCG: 5.378%@20, 9.989%@100, Time: 5.452s
Save model to checkpoints\LightGCN_BPRTrainer_LGCNDataset_5.378.pth
Epoch 712/1500, Loss: 0.026394, Time: 172.711s
Test result. Precision: 2.950%@20, 1.833%@100, Recall: 6.569%@20, 19.878%@100, NDCG: 5.376%@20, 9.988%@100, Time: 5.654s
Save model to checkpoints\LightGCN_BPRTrainer_LGCNDataset_5.376.pth
Epoch 713/1500, Loss: 0.026607, Time: 171.518s
Test result. Precision: 2.943%@20, 1.831%@100, Recall: 6.546%@20, 19.871%@100, NDCG: 5.368%@20, 9.985%@100, Time: 5.588s
Save model to checkpoints\LightGCN_BPRTrainer_LGCNDataset_5.368.pth
Epoch 714/1500, Loss: 0.026352, Time: 171.207s
Test result. Precision: 2.950%@20, 1.831%@100, Recall: 6.558%@20, 19.874%@100, NDCG: 5.378%@20, 9.989%@100, Time: 5.385s
Save model to checkpoints\LightGCN_BPRTrainer_LGCNDataset_5.378.pth
Epoch 715/1500, Loss: 0.026452, Time: 170.415s
Test result. Precision: 2.948%@20, 1.831%@100, Recall: 6.565%@20, 19.873%@100, NDCG: 5.383%@20, 9.993%@100, Time: 5.758s
Save model to checkpoints\LightGCN_BPRTrainer_LGCNDataset_5.383.pth
Epoch 716/1500, Loss: 0.026623, Time: 170.364s
Test result. Precision: 2.943%@20, 1.832%@100, Recall: 6.556%@20, 19.889%@100, NDCG: 5.382%@20, 10.002%@100, Time: 5.577s
Save model to checkpoints\LightGCN_BPRTrainer_LGCNDataset_5.382.pth
Epoch 717/1500, Loss: 0.026568, Time: 169.784s
Test result. Precision: 2.950%@20, 1.836%@100, Recall: 6.564%@20, 19.922%@100, NDCG: 5.384%@20, 10.012%@100, Time: 5.452s
Save model to checkpoints\LightGCN_BPRTrainer_LGCNDataset_5.384.pth
Epoch 718/1500, Loss: 0.026447, Time: 170.616s
Test result. Precision: 2.952%@20, 1.834%@100, Recall: 6.567%@20, 19.904%@100, NDCG: 5.390%@20, 10.009%@100, Time: 5.483s
Save model to checkpoints\LightGCN_BPRTrainer_LGCNDataset_5.390.pth
Epoch 719/1500, Loss: 0.026434, Time: 170.019s
Test result. Precision: 2.953%@20, 1.834%@100, Recall: 6.568%@20, 19.913%@100, NDCG: 5.391%@20, 10.011%@100, Time: 5.343s
Save model to checkpoints\LightGCN_BPRTrainer_LGCNDataset_5.391.pth
Epoch 720/1500, Loss: 0.026512, Time: 169.523s
Test result. Precision: 2.951%@20, 1.833%@100, Recall: 6.564%@20, 19.897%@100, NDCG: 5.380%@20, 9.998%@100, Time: 5.421s
Save model to checkpoints\LightGCN_BPRTrainer_LGCNDataset_5.380.pth
Epoch 721/1500, Loss: 0.026684, Time: 169.788s
Test result. Precision: 2.947%@20, 1.833%@100, Recall: 6.559%@20, 19.890%@100, NDCG: 5.373%@20, 9.990%@100, Time: 5.421s
Save model to checkpoints\LightGCN_BPRTrainer_LGCNDataset_5.373.pth
Epoch 722/1500, Loss: 0.026554, Time: 169.715s
Test result. Precision: 2.954%@20, 1.834%@100, Recall: 6.563%@20, 19.893%@100, NDCG: 5.385%@20, 10.002%@100, Time: 5.374s
Save model to checkpoints\LightGCN_BPRTrainer_LGCNDataset_5.385.pth
Epoch 723/1500, Loss: 0.026547, Time: 169.320s
Test result. Precision: 2.953%@20, 1.835%@100, Recall: 6.569%@20, 19.906%@100, NDCG: 5.383%@20, 10.003%@100, Time: 5.561s
Save model to checkpoints\LightGCN_BPRTrainer_LGCNDataset_5.383.pth
Epoch 724/1500, Loss: 0.026696, Time: 169.650s
Test result. Precision: 2.951%@20, 1.834%@100, Recall: 6.564%@20, 19.897%@100, NDCG: 5.380%@20, 9.999%@100, Time: 5.467s
Save model to checkpoints\LightGCN_BPRTrainer_LGCNDataset_5.380.pth
Epoch 725/1500, Loss: 0.026515, Time: 170.132s
Test result. Precision: 2.953%@20, 1.832%@100, Recall: 6.559%@20, 19.871%@100, NDCG: 5.384%@20, 9.995%@100, Time: 5.561s
Save model to checkpoints\LightGCN_BPRTrainer_LGCNDataset_5.384.pth
Epoch 726/1500, Loss: 0.026573, Time: 170.398s
Test result. Precision: 2.950%@20, 1.832%@100, Recall: 6.560%@20, 19.872%@100, NDCG: 5.382%@20, 9.992%@100, Time: 5.436s
Save model to checkpoints\LightGCN_BPRTrainer_LGCNDataset_5.382.pth
Epoch 727/1500, Loss: 0.026617, Time: 170.760s
Test result. Precision: 2.950%@20, 1.832%@100, Recall: 6.557%@20, 19.882%@100, NDCG: 5.376%@20, 9.991%@100, Time: 5.533s
Save model to checkpoints\LightGCN_BPRTrainer_LGCNDataset_5.376.pth
Epoch 728/1500, Loss: 0.026846, Time: 170.156s
Test result. Precision: 2.955%@20, 1.833%@100, Recall: 6.572%@20, 19.885%@100, NDCG: 5.388%@20, 9.998%@100, Time: 5.501s
Save model to checkpoints\LightGCN_BPRTrainer_LGCNDataset_5.388.pth
Epoch 729/1500, Loss: 0.026481, Time: 170.588s
Test result. Precision: 2.955%@20, 1.835%@100, Recall: 6.566%@20, 19.895%@100, NDCG: 5.389%@20, 10.005%@100, Time: 5.602s
Save model to checkpoints\LightGCN_BPRTrainer_LGCNDataset_5.389.pth
Epoch 730/1500, Loss: 0.026424, Time: 171.250s
Test result. Precision: 2.956%@20, 1.836%@100, Recall: 6.580%@20, 19.911%@100, NDCG: 5.401%@20, 10.018%@100, Time: 5.561s
Save model to checkpoints\LightGCN_BPRTrainer_LGCNDataset_5.401.pth
Epoch 731/1500, Loss: 0.026501, Time: 170.489s
Test result. Precision: 2.953%@20, 1.836%@100, Recall: 6.577%@20, 19.894%@100, NDCG: 5.396%@20, 10.011%@100, Time: 5.508s
Save model to checkpoints\LightGCN_BPRTrainer_LGCNDataset_5.396.pth
Epoch 732/1500, Loss: 0.026531, Time: 170.071s
Test result. Precision: 2.958%@20, 1.834%@100, Recall: 6.581%@20, 19.889%@100, NDCG: 5.398%@20, 10.007%@100, Time: 5.389s
Save model to checkpoints\LightGCN_BPRTrainer_LGCNDataset_5.398.pth
Epoch 733/1500, Loss: 0.026658, Time: 170.154s
Test result. Precision: 2.949%@20, 1.834%@100, Recall: 6.563%@20, 19.866%@100, NDCG: 5.387%@20, 9.998%@100, Time: 5.569s
Save model to checkpoints\LightGCN_BPRTrainer_LGCNDataset_5.387.pth
Epoch 734/1500, Loss: 0.026514, Time: 171.268s
Test result. Precision: 2.950%@20, 1.834%@100, Recall: 6.564%@20, 19.879%@100, NDCG: 5.388%@20, 10.004%@100, Time: 5.358s
Save model to checkpoints\LightGCN_BPRTrainer_LGCNDataset_5.388.pth
Epoch 735/1500, Loss: 0.026759, Time: 170.224s
Test result. Precision: 2.955%@20, 1.833%@100, Recall: 6.573%@20, 19.867%@100, NDCG: 5.398%@20, 10.004%@100, Time: 5.436s
Save model to checkpoints\LightGCN_BPRTrainer_LGCNDataset_5.398.pth
Epoch 736/1500, Loss: 0.026401, Time: 169.787s
Test result. Precision: 2.956%@20, 1.834%@100, Recall: 6.569%@20, 19.889%@100, NDCG: 5.395%@20, 10.008%@100, Time: 5.405s
Save model to checkpoints\LightGCN_BPRTrainer_LGCNDataset_5.395.pth
Epoch 737/1500, Loss: 0.026397, Time: 170.775s
Test result. Precision: 2.957%@20, 1.833%@100, Recall: 6.577%@20, 19.865%@100, NDCG: 5.397%@20, 10.001%@100, Time: 5.492s
Save model to checkpoints\LightGCN_BPRTrainer_LGCNDataset_5.397.pth
Epoch 738/1500, Loss: 0.026692, Time: 170.323s
Test result. Precision: 2.962%@20, 1.835%@100, Recall: 6.592%@20, 19.893%@100, NDCG: 5.416%@20, 10.022%@100, Time: 5.538s
Save model to checkpoints\LightGCN_BPRTrainer_LGCNDataset_5.416.pth
Epoch 739/1500, Loss: 0.026474, Time: 171.376s
Test result. Precision: 2.962%@20, 1.836%@100, Recall: 6.590%@20, 19.910%@100, NDCG: 5.409%@20, 10.020%@100, Time: 5.452s
Save model to checkpoints\LightGCN_BPRTrainer_LGCNDataset_5.409.pth
Epoch 740/1500, Loss: 0.026502, Time: 170.142s
Test result. Precision: 2.963%@20, 1.835%@100, Recall: 6.583%@20, 19.887%@100, NDCG: 5.411%@20, 10.018%@100, Time: 5.421s
Save model to checkpoints\LightGCN_BPRTrainer_LGCNDataset_5.411.pth
Epoch 741/1500, Loss: 0.026482, Time: 169.533s
Test result. Precision: 2.963%@20, 1.834%@100, Recall: 6.581%@20, 19.872%@100, NDCG: 5.405%@20, 10.008%@100, Time: 5.483s
Save model to checkpoints\LightGCN_BPRTrainer_LGCNDataset_5.405.pth
Epoch 742/1500, Loss: 0.026546, Time: 169.366s
Test result. Precision: 2.959%@20, 1.833%@100, Recall: 6.577%@20, 19.855%@100, NDCG: 5.407%@20, 10.007%@100, Time: 5.311s
Save model to checkpoints\LightGCN_BPRTrainer_LGCNDataset_5.407.pth
Epoch 743/1500, Loss: 0.026485, Time: 169.888s
Test result. Precision: 2.954%@20, 1.831%@100, Recall: 6.563%@20, 19.852%@100, NDCG: 5.408%@20, 10.012%@100, Time: 5.409s
Save model to checkpoints\LightGCN_BPRTrainer_LGCNDataset_5.408.pth
Epoch 744/1500, Loss: 0.026674, Time: 169.929s
Test result. Precision: 2.952%@20, 1.833%@100, Recall: 6.569%@20, 19.876%@100, NDCG: 5.398%@20, 10.010%@100, Time: 5.405s
Save model to checkpoints\LightGCN_BPRTrainer_LGCNDataset_5.398.pth
Epoch 745/1500, Loss: 0.026226, Time: 169.462s
Test result. Precision: 2.948%@20, 1.833%@100, Recall: 6.560%@20, 19.885%@100, NDCG: 5.394%@20, 10.012%@100, Time: 5.405s
Save model to checkpoints\LightGCN_BPRTrainer_LGCNDataset_5.394.pth
Epoch 746/1500, Loss: 0.026512, Time: 169.429s
Test result. Precision: 2.949%@20, 1.832%@100, Recall: 6.557%@20, 19.861%@100, NDCG: 5.395%@20, 10.005%@100, Time: 5.327s
Save model to checkpoints\LightGCN_BPRTrainer_LGCNDataset_5.395.pth
Epoch 747/1500, Loss: 0.026383, Time: 169.413s
Test result. Precision: 2.954%@20, 1.833%@100, Recall: 6.567%@20, 19.877%@100, NDCG: 5.397%@20, 10.008%@100, Time: 5.452s
Save model to checkpoints\LightGCN_BPRTrainer_LGCNDataset_5.397.pth
Epoch 748/1500, Loss: 0.026604, Time: 169.507s
Test result. Precision: 2.954%@20, 1.832%@100, Recall: 6.564%@20, 19.867%@100, NDCG: 5.402%@20, 10.009%@100, Time: 5.358s
Save model to checkpoints\LightGCN_BPRTrainer_LGCNDataset_5.402.pth
Epoch 749/1500, Loss: 0.026462, Time: 169.811s
Test result. Precision: 2.950%@20, 1.830%@100, Recall: 6.560%@20, 19.848%@100, NDCG: 5.400%@20, 10.003%@100, Time: 5.405s
Save model to checkpoints\LightGCN_BPRTrainer_LGCNDataset_5.400.pth
Epoch 750/1500, Loss: 0.026626, Time: 169.554s
Test result. Precision: 2.951%@20, 1.829%@100, Recall: 6.559%@20, 19.825%@100, NDCG: 5.395%@20, 9.992%@100, Time: 5.577s
Save model to checkpoints\LightGCN_BPRTrainer_LGCNDataset_5.395.pth
Epoch 751/1500, Loss: 0.026530, Time: 169.947s
Test result. Precision: 2.946%@20, 1.830%@100, Recall: 6.552%@20, 19.845%@100, NDCG: 5.390%@20, 9.997%@100, Time: 5.421s
Save model to checkpoints\LightGCN_BPRTrainer_LGCNDataset_5.390.pth
Epoch 752/1500, Loss: 0.026402, Time: 170.344s
Test result. Precision: 2.949%@20, 1.830%@100, Recall: 6.565%@20, 19.847%@100, NDCG: 5.395%@20, 9.999%@100, Time: 5.405s
Save model to checkpoints\LightGCN_BPRTrainer_LGCNDataset_5.395.pth
Epoch 753/1500, Loss: 0.026629, Time: 170.514s
Test result. Precision: 2.953%@20, 1.831%@100, Recall: 6.567%@20, 19.834%@100, NDCG: 5.400%@20, 9.999%@100, Time: 5.452s
Save model to checkpoints\LightGCN_BPRTrainer_LGCNDataset_5.400.pth
Epoch 754/1500, Loss: 0.026604, Time: 170.620s
Test result. Precision: 2.949%@20, 1.832%@100, Recall: 6.558%@20, 19.853%@100, NDCG: 5.401%@20, 10.009%@100, Time: 5.514s
Save model to checkpoints\LightGCN_BPRTrainer_LGCNDataset_5.401.pth
Epoch 755/1500, Loss: 0.026475, Time: 170.023s
Test result. Precision: 2.955%@20, 1.832%@100, Recall: 6.570%@20, 19.868%@100, NDCG: 5.405%@20, 10.012%@100, Time: 5.467s
Save model to checkpoints\LightGCN_BPRTrainer_LGCNDataset_5.405.pth
Epoch 756/1500, Loss: 0.026508, Time: 170.037s
Test result. Precision: 2.954%@20, 1.834%@100, Recall: 6.559%@20, 19.867%@100, NDCG: 5.402%@20, 10.013%@100, Time: 5.499s
Save model to checkpoints\LightGCN_BPRTrainer_LGCNDataset_5.402.pth
Epoch 757/1500, Loss: 0.026628, Time: 172.731s
Test result. Precision: 2.953%@20, 1.832%@100, Recall: 6.560%@20, 19.847%@100, NDCG: 5.406%@20, 10.010%@100, Time: 5.463s
Save model to checkpoints\LightGCN_BPRTrainer_LGCNDataset_5.406.pth
Epoch 758/1500, Loss: 0.026483, Time: 172.209s
Test result. Precision: 2.955%@20, 1.830%@100, Recall: 6.559%@20, 19.844%@100, NDCG: 5.410%@20, 10.011%@100, Time: 5.483s
Save model to checkpoints\LightGCN_BPRTrainer_LGCNDataset_5.410.pth
Epoch 759/1500, Loss: 0.026418, Time: 169.920s
Test result. Precision: 2.959%@20, 1.832%@100, Recall: 6.577%@20, 19.849%@100, NDCG: 5.413%@20, 10.012%@100, Time: 5.794s
Save model to checkpoints\LightGCN_BPRTrainer_LGCNDataset_5.413.pth
Epoch 760/1500, Loss: 0.026300, Time: 170.146s
Test result. Precision: 2.959%@20, 1.829%@100, Recall: 6.571%@20, 19.813%@100, NDCG: 5.405%@20, 9.993%@100, Time: 5.405s
Save model to checkpoints\LightGCN_BPRTrainer_LGCNDataset_5.405.pth
Epoch 761/1500, Loss: 0.026382, Time: 169.625s
Test result. Precision: 2.955%@20, 1.831%@100, Recall: 6.558%@20, 19.836%@100, NDCG: 5.408%@20, 10.009%@100, Time: 5.507s
Save model to checkpoints\LightGCN_BPRTrainer_LGCNDataset_5.408.pth
Epoch 762/1500, Loss: 0.026501, Time: 170.179s
Test result. Precision: 2.959%@20, 1.831%@100, Recall: 6.570%@20, 19.839%@100, NDCG: 5.408%@20, 10.004%@100, Time: 5.358s
Save model to checkpoints\LightGCN_BPRTrainer_LGCNDataset_5.408.pth
Epoch 763/1500, Loss: 0.026566, Time: 170.049s
Test result. Precision: 2.959%@20, 1.833%@100, Recall: 6.570%@20, 19.851%@100, NDCG: 5.411%@20, 10.013%@100, Time: 5.421s
Save model to checkpoints\LightGCN_BPRTrainer_LGCNDataset_5.411.pth
Epoch 764/1500, Loss: 0.026659, Time: 169.697s
Test result. Precision: 2.957%@20, 1.834%@100, Recall: 6.573%@20, 19.872%@100, NDCG: 5.418%@20, 10.025%@100, Time: 5.561s
Save model to checkpoints\LightGCN_BPRTrainer_LGCNDataset_5.418.pth
Epoch 765/1500, Loss: 0.026443, Time: 169.659s
Test result. Precision: 2.958%@20, 1.833%@100, Recall: 6.571%@20, 19.848%@100, NDCG: 5.410%@20, 10.011%@100, Time: 5.405s
Save model to checkpoints\LightGCN_BPRTrainer_LGCNDataset_5.410.pth
Epoch 766/1500, Loss: 0.026168, Time: 169.780s
Test result. Precision: 2.961%@20, 1.833%@100, Recall: 6.577%@20, 19.858%@100, NDCG: 5.415%@20, 10.014%@100, Time: 5.389s
Save model to checkpoints\LightGCN_BPRTrainer_LGCNDataset_5.415.pth
Epoch 767/1500, Loss: 0.026373, Time: 169.527s
Test result. Precision: 2.962%@20, 1.833%@100, Recall: 6.582%@20, 19.861%@100, NDCG: 5.415%@20, 10.013%@100, Time: 5.547s
Save model to checkpoints\LightGCN_BPRTrainer_LGCNDataset_5.415.pth
Epoch 768/1500, Loss: 0.026301, Time: 169.545s
Test result. Precision: 2.963%@20, 1.832%@100, Recall: 6.588%@20, 19.865%@100, NDCG: 5.416%@20, 10.012%@100, Time: 5.392s
Save model to checkpoints\LightGCN_BPRTrainer_LGCNDataset_5.416.pth
Epoch 769/1500, Loss: 0.026587, Time: 169.695s
Test result. Precision: 2.962%@20, 1.832%@100, Recall: 6.585%@20, 19.851%@100, NDCG: 5.416%@20, 10.009%@100, Time: 5.436s
Save model to checkpoints\LightGCN_BPRTrainer_LGCNDataset_5.416.pth
Epoch 770/1500, Loss: 0.026484, Time: 170.281s
Test result. Precision: 2.955%@20, 1.832%@100, Recall: 6.566%@20, 19.848%@100, NDCG: 5.404%@20, 10.004%@100, Time: 5.483s
Save model to checkpoints\LightGCN_BPRTrainer_LGCNDataset_5.404.pth
Epoch 771/1500, Loss: 0.026490, Time: 169.706s
Test result. Precision: 2.955%@20, 1.830%@100, Recall: 6.560%@20, 19.828%@100, NDCG: 5.398%@20, 9.992%@100, Time: 5.483s
Save model to checkpoints\LightGCN_BPRTrainer_LGCNDataset_5.398.pth
Epoch 772/1500, Loss: 0.026356, Time: 169.741s
Test result. Precision: 2.960%@20, 1.831%@100, Recall: 6.568%@20, 19.830%@100, NDCG: 5.399%@20, 9.991%@100, Time: 5.452s
Save model to checkpoints\LightGCN_BPRTrainer_LGCNDataset_5.399.pth
Epoch 773/1500, Loss: 0.026445, Time: 169.815s
Test result. Precision: 2.956%@20, 1.834%@100, Recall: 6.551%@20, 19.855%@100, NDCG: 5.397%@20, 10.005%@100, Time: 5.409s
Save model to checkpoints\LightGCN_BPRTrainer_LGCNDataset_5.397.pth
Epoch 774/1500, Loss: 0.026415, Time: 169.472s
Test result. Precision: 2.956%@20, 1.831%@100, Recall: 6.564%@20, 19.831%@100, NDCG: 5.397%@20, 9.992%@100, Time: 5.483s
Save model to checkpoints\LightGCN_BPRTrainer_LGCNDataset_5.397.pth
Epoch 775/1500, Loss: 0.026295, Time: 169.932s
Test result. Precision: 2.953%@20, 1.831%@100, Recall: 6.558%@20, 19.826%@100, NDCG: 5.395%@20, 9.992%@100, Time: 5.452s
Save model to checkpoints\LightGCN_BPRTrainer_LGCNDataset_5.395.pth
Epoch 776/1500, Loss: 0.026321, Time: 169.686s
Test result. Precision: 2.958%@20, 1.832%@100, Recall: 6.567%@20, 19.850%@100, NDCG: 5.398%@20, 9.997%@100, Time: 5.327s
Save model to checkpoints\LightGCN_BPRTrainer_LGCNDataset_5.398.pth
Epoch 777/1500, Loss: 0.026236, Time: 169.729s
Test result. Precision: 2.960%@20, 1.832%@100, Recall: 6.567%@20, 19.842%@100, NDCG: 5.404%@20, 10.001%@100, Time: 5.374s
Save model to checkpoints\LightGCN_BPRTrainer_LGCNDataset_5.404.pth
Epoch 778/1500, Loss: 0.026326, Time: 169.948s
Test result. Precision: 2.968%@20, 1.833%@100, Recall: 6.586%@20, 19.857%@100, NDCG: 5.415%@20, 10.009%@100, Time: 5.561s
Save model to checkpoints\LightGCN_BPRTrainer_LGCNDataset_5.415.pth
Epoch 779/1500, Loss: 0.026332, Time: 169.725s
Test result. Precision: 2.968%@20, 1.833%@100, Recall: 6.588%@20, 19.846%@100, NDCG: 5.412%@20, 10.001%@100, Time: 5.472s
Save model to checkpoints\LightGCN_BPRTrainer_LGCNDataset_5.412.pth
Epoch 780/1500, Loss: 0.026249, Time: 169.720s
Test result. Precision: 2.965%@20, 1.833%@100, Recall: 6.578%@20, 19.856%@100, NDCG: 5.410%@20, 10.008%@100, Time: 5.544s
Save model to checkpoints\LightGCN_BPRTrainer_LGCNDataset_5.410.pth
Epoch 781/1500, Loss: 0.026138, Time: 169.838s
Test result. Precision: 2.959%@20, 1.833%@100, Recall: 6.562%@20, 19.847%@100, NDCG: 5.395%@20, 9.997%@100, Time: 5.374s
Save model to checkpoints\LightGCN_BPRTrainer_LGCNDataset_5.395.pth
Epoch 782/1500, Loss: 0.026089, Time: 169.504s
Test result. Precision: 2.965%@20, 1.833%@100, Recall: 6.582%@20, 19.852%@100, NDCG: 5.405%@20, 10.000%@100, Time: 5.499s
Save model to checkpoints\LightGCN_BPRTrainer_LGCNDataset_5.405.pth
Epoch 783/1500, Loss: 0.026167, Time: 169.782s
Test result. Precision: 2.969%@20, 1.834%@100, Recall: 6.593%@20, 19.868%@100, NDCG: 5.410%@20, 10.006%@100, Time: 5.421s
Save model to checkpoints\LightGCN_BPRTrainer_LGCNDataset_5.410.pth
Epoch 784/1500, Loss: 0.026598, Time: 169.697s
Test result. Precision: 2.971%@20, 1.832%@100, Recall: 6.589%@20, 19.857%@100, NDCG: 5.408%@20, 9.998%@100, Time: 5.499s
Save model to checkpoints\LightGCN_BPRTrainer_LGCNDataset_5.408.pth
Epoch 785/1500, Loss: 0.026385, Time: 169.774s
Test result. Precision: 2.963%@20, 1.831%@100, Recall: 6.571%@20, 19.849%@100, NDCG: 5.410%@20, 10.004%@100, Time: 5.459s
Save model to checkpoints\LightGCN_BPRTrainer_LGCNDataset_5.410.pth
Epoch 786/1500, Loss: 0.026379, Time: 169.552s
Test result. Precision: 2.971%@20, 1.835%@100, Recall: 6.586%@20, 19.891%@100, NDCG: 5.419%@20, 10.021%@100, Time: 5.574s
Save model to checkpoints\LightGCN_BPRTrainer_LGCNDataset_5.419.pth
Epoch 787/1500, Loss: 0.026359, Time: 169.996s
Test result. Precision: 2.965%@20, 1.834%@100, Recall: 6.583%@20, 19.872%@100, NDCG: 5.415%@20, 10.016%@100, Time: 5.483s
Save model to checkpoints\LightGCN_BPRTrainer_LGCNDataset_5.415.pth
Epoch 788/1500, Loss: 0.026612, Time: 169.662s
Test result. Precision: 2.974%@20, 1.836%@100, Recall: 6.600%@20, 19.897%@100, NDCG: 5.422%@20, 10.023%@100, Time: 5.374s
Save model to checkpoints\LightGCN_BPRTrainer_LGCNDataset_5.422.pth
Epoch 789/1500, Loss: 0.026322, Time: 169.792s
Test result. Precision: 2.972%@20, 1.835%@100, Recall: 6.593%@20, 19.879%@100, NDCG: 5.419%@20, 10.018%@100, Time: 5.389s
Save model to checkpoints\LightGCN_BPRTrainer_LGCNDataset_5.419.pth
Epoch 790/1500, Loss: 0.026520, Time: 170.178s
Test result. Precision: 2.972%@20, 1.834%@100, Recall: 6.592%@20, 19.870%@100, NDCG: 5.420%@20, 10.018%@100, Time: 5.436s
Save model to checkpoints\LightGCN_BPRTrainer_LGCNDataset_5.420.pth
Epoch 791/1500, Loss: 0.026339, Time: 169.813s
Test result. Precision: 2.967%@20, 1.833%@100, Recall: 6.581%@20, 19.859%@100, NDCG: 5.424%@20, 10.024%@100, Time: 5.376s
Save model to checkpoints\LightGCN_BPRTrainer_LGCNDataset_5.424.pth
Epoch 792/1500, Loss: 0.026283, Time: 169.516s
Test result. Precision: 2.963%@20, 1.834%@100, Recall: 6.568%@20, 19.884%@100, NDCG: 5.414%@20, 10.024%@100, Time: 5.474s
Save model to checkpoints\LightGCN_BPRTrainer_LGCNDataset_5.414.pth
Epoch 793/1500, Loss: 0.026469, Time: 170.046s
Test result. Precision: 2.965%@20, 1.832%@100, Recall: 6.568%@20, 19.839%@100, NDCG: 5.405%@20, 10.002%@100, Time: 5.507s
Save model to checkpoints\LightGCN_BPRTrainer_LGCNDataset_5.405.pth
Epoch 794/1500, Loss: 0.026241, Time: 169.714s
Test result. Precision: 2.971%@20, 1.834%@100, Recall: 6.582%@20, 19.876%@100, NDCG: 5.416%@20, 10.016%@100, Time: 5.311s
Save model to checkpoints\LightGCN_BPRTrainer_LGCNDataset_5.416.pth
Epoch 795/1500, Loss: 0.026268, Time: 169.765s
Test result. Precision: 2.972%@20, 1.835%@100, Recall: 6.591%@20, 19.876%@100, NDCG: 5.421%@20, 10.020%@100, Time: 5.374s
Save model to checkpoints\LightGCN_BPRTrainer_LGCNDataset_5.421.pth
Epoch 796/1500, Loss: 0.026301, Time: 169.935s
Test result. Precision: 2.969%@20, 1.835%@100, Recall: 6.584%@20, 19.872%@100, NDCG: 5.415%@20, 10.015%@100, Time: 5.514s
Save model to checkpoints\LightGCN_BPRTrainer_LGCNDataset_5.415.pth
Epoch 797/1500, Loss: 0.026319, Time: 170.026s
Test result. Precision: 2.966%@20, 1.835%@100, Recall: 6.583%@20, 19.874%@100, NDCG: 5.409%@20, 10.013%@100, Time: 5.483s
Save model to checkpoints\LightGCN_BPRTrainer_LGCNDataset_5.409.pth
Epoch 798/1500, Loss: 0.026453, Time: 169.704s
Test result. Precision: 2.960%@20, 1.833%@100, Recall: 6.575%@20, 19.857%@100, NDCG: 5.406%@20, 10.008%@100, Time: 5.455s
Save model to checkpoints\LightGCN_BPRTrainer_LGCNDataset_5.406.pth
Epoch 799/1500, Loss: 0.026424, Time: 169.862s
Test result. Precision: 2.960%@20, 1.834%@100, Recall: 6.573%@20, 19.868%@100, NDCG: 5.402%@20, 10.008%@100, Time: 5.473s
Save model to checkpoints\LightGCN_BPRTrainer_LGCNDataset_5.402.pth
Epoch 800/1500, Loss: 0.026315, Time: 169.527s
Test result. Precision: 2.959%@20, 1.834%@100, Recall: 6.572%@20, 19.866%@100, NDCG: 5.407%@20, 10.013%@100, Time: 5.467s
Save model to checkpoints\LightGCN_BPRTrainer_LGCNDataset_5.407.pth
Epoch 801/1500, Loss: 0.026353, Time: 170.161s
Test result. Precision: 2.956%@20, 1.832%@100, Recall: 6.560%@20, 19.861%@100, NDCG: 5.402%@20, 10.009%@100, Time: 5.452s
Save model to checkpoints\LightGCN_BPRTrainer_LGCNDataset_5.402.pth
Epoch 802/1500, Loss: 0.026566, Time: 170.029s
Test result. Precision: 2.963%@20, 1.836%@100, Recall: 6.574%@20, 19.896%@100, NDCG: 5.410%@20, 10.025%@100, Time: 5.374s
Save model to checkpoints\LightGCN_BPRTrainer_LGCNDataset_5.410.pth
Epoch 803/1500, Loss: 0.026342, Time: 169.955s
Test result. Precision: 2.965%@20, 1.834%@100, Recall: 6.583%@20, 19.867%@100, NDCG: 5.414%@20, 10.016%@100, Time: 5.452s
Save model to checkpoints\LightGCN_BPRTrainer_LGCNDataset_5.414.pth
Epoch 804/1500, Loss: 0.026341, Time: 169.628s
Test result. Precision: 2.964%@20, 1.834%@100, Recall: 6.582%@20, 19.873%@100, NDCG: 5.411%@20, 10.015%@100, Time: 5.539s
Save model to checkpoints\LightGCN_BPRTrainer_LGCNDataset_5.411.pth
Epoch 805/1500, Loss: 0.026273, Time: 169.791s
Test result. Precision: 2.969%@20, 1.834%@100, Recall: 6.595%@20, 19.875%@100, NDCG: 5.417%@20, 10.016%@100, Time: 5.441s
Save model to checkpoints\LightGCN_BPRTrainer_LGCNDataset_5.417.pth
Epoch 806/1500, Loss: 0.026325, Time: 170.391s
Test result. Precision: 2.970%@20, 1.835%@100, Recall: 6.596%@20, 19.885%@100, NDCG: 5.425%@20, 10.026%@100, Time: 5.639s
Save model to checkpoints\LightGCN_BPRTrainer_LGCNDataset_5.425.pth
Epoch 807/1500, Loss: 0.026195, Time: 170.343s
Test result. Precision: 2.970%@20, 1.836%@100, Recall: 6.598%@20, 19.893%@100, NDCG: 5.424%@20, 10.030%@100, Time: 5.530s
Save model to checkpoints\LightGCN_BPRTrainer_LGCNDataset_5.424.pth
Epoch 808/1500, Loss: 0.026134, Time: 170.113s
Test result. Precision: 2.971%@20, 1.836%@100, Recall: 6.595%@20, 19.887%@100, NDCG: 5.418%@20, 10.021%@100, Time: 5.436s
Save model to checkpoints\LightGCN_BPRTrainer_LGCNDataset_5.418.pth
Epoch 809/1500, Loss: 0.026366, Time: 169.871s
Test result. Precision: 2.966%@20, 1.835%@100, Recall: 6.578%@20, 19.886%@100, NDCG: 5.415%@20, 10.023%@100, Time: 5.421s
Save model to checkpoints\LightGCN_BPRTrainer_LGCNDataset_5.415.pth
Epoch 810/1500, Loss: 0.026303, Time: 169.862s
Test result. Precision: 2.973%@20, 1.834%@100, Recall: 6.593%@20, 19.886%@100, NDCG: 5.420%@20, 10.020%@100, Time: 5.358s
Save model to checkpoints\LightGCN_BPRTrainer_LGCNDataset_5.420.pth
Epoch 811/1500, Loss: 0.026322, Time: 170.059s
Test result. Precision: 2.974%@20, 1.836%@100, Recall: 6.594%@20, 19.887%@100, NDCG: 5.420%@20, 10.022%@100, Time: 5.388s
Save model to checkpoints\LightGCN_BPRTrainer_LGCNDataset_5.420.pth
Epoch 812/1500, Loss: 0.026398, Time: 169.761s
Test result. Precision: 2.979%@20, 1.834%@100, Recall: 6.598%@20, 19.869%@100, NDCG: 5.422%@20, 10.015%@100, Time: 5.495s
Save model to checkpoints\LightGCN_BPRTrainer_LGCNDataset_5.422.pth
Epoch 813/1500, Loss: 0.026147, Time: 169.579s
Test result. Precision: 2.979%@20, 1.835%@100, Recall: 6.605%@20, 19.873%@100, NDCG: 5.425%@20, 10.019%@100, Time: 5.467s
Save model to checkpoints\LightGCN_BPRTrainer_LGCNDataset_5.425.pth
Epoch 814/1500, Loss: 0.026612, Time: 169.961s
Test result. Precision: 2.975%@20, 1.836%@100, Recall: 6.602%@20, 19.891%@100, NDCG: 5.423%@20, 10.024%@100, Time: 5.514s
Save model to checkpoints\LightGCN_BPRTrainer_LGCNDataset_5.423.pth
Epoch 815/1500, Loss: 0.026532, Time: 170.163s
Test result. Precision: 2.983%@20, 1.836%@100, Recall: 6.612%@20, 19.891%@100, NDCG: 5.432%@20, 10.028%@100, Time: 5.374s
Save model to checkpoints\LightGCN_BPRTrainer_LGCNDataset_5.432.pth
Epoch 816/1500, Loss: 0.026208, Time: 169.556s
Test result. Precision: 2.984%@20, 1.836%@100, Recall: 6.620%@20, 19.884%@100, NDCG: 5.429%@20, 10.021%@100, Time: 5.452s
Save model to checkpoints\LightGCN_BPRTrainer_LGCNDataset_5.429.pth
Epoch 817/1500, Loss: 0.026363, Time: 169.820s
Test result. Precision: 2.983%@20, 1.836%@100, Recall: 6.625%@20, 19.887%@100, NDCG: 5.435%@20, 10.026%@100, Time: 5.432s
Save model to checkpoints\LightGCN_BPRTrainer_LGCNDataset_5.435.pth
Epoch 818/1500, Loss: 0.026467, Time: 170.112s
Test result. Precision: 2.975%@20, 1.835%@100, Recall: 6.600%@20, 19.884%@100, NDCG: 5.419%@20, 10.017%@100, Time: 5.461s
Save model to checkpoints\LightGCN_BPRTrainer_LGCNDataset_5.419.pth
Epoch 819/1500, Loss: 0.026251, Time: 169.734s
Test result. Precision: 2.972%@20, 1.835%@100, Recall: 6.590%@20, 19.888%@100, NDCG: 5.412%@20, 10.015%@100, Time: 5.421s
Save model to checkpoints\LightGCN_BPRTrainer_LGCNDataset_5.412.pth
Epoch 820/1500, Loss: 0.026257, Time: 169.677s
Test result. Precision: 2.976%@20, 1.833%@100, Recall: 6.603%@20, 19.866%@100, NDCG: 5.420%@20, 10.011%@100, Time: 5.389s
Save model to checkpoints\LightGCN_BPRTrainer_LGCNDataset_5.420.pth
Epoch 821/1500, Loss: 0.026353, Time: 169.925s
Test result. Precision: 2.974%@20, 1.836%@100, Recall: 6.600%@20, 19.890%@100, NDCG: 5.424%@20, 10.027%@100, Time: 5.452s
Save model to checkpoints\LightGCN_BPRTrainer_LGCNDataset_5.424.pth
Epoch 822/1500, Loss: 0.026405, Time: 169.995s
Test result. Precision: 2.976%@20, 1.837%@100, Recall: 6.597%@20, 19.909%@100, NDCG: 5.425%@20, 10.032%@100, Time: 5.467s
Save model to checkpoints\LightGCN_BPRTrainer_LGCNDataset_5.425.pth
Epoch 823/1500, Loss: 0.026220, Time: 170.015s
Test result. Precision: 2.971%@20, 1.835%@100, Recall: 6.584%@20, 19.899%@100, NDCG: 5.418%@20, 10.026%@100, Time: 5.400s
Save model to checkpoints\LightGCN_BPRTrainer_LGCNDataset_5.418.pth
Epoch 824/1500, Loss: 0.026402, Time: 170.297s
Test result. Precision: 2.967%@20, 1.836%@100, Recall: 6.584%@20, 19.898%@100, NDCG: 5.415%@20, 10.026%@100, Time: 5.469s
Save model to checkpoints\LightGCN_BPRTrainer_LGCNDataset_5.415.pth
Epoch 825/1500, Loss: 0.026313, Time: 169.627s
Test result. Precision: 2.971%@20, 1.834%@100, Recall: 6.593%@20, 19.881%@100, NDCG: 5.421%@20, 10.022%@100, Time: 5.458s
Save model to checkpoints\LightGCN_BPRTrainer_LGCNDataset_5.421.pth
Epoch 826/1500, Loss: 0.026301, Time: 169.736s
Test result. Precision: 2.966%@20, 1.836%@100, Recall: 6.577%@20, 19.904%@100, NDCG: 5.420%@20, 10.034%@100, Time: 5.374s
Save model to checkpoints\LightGCN_BPRTrainer_LGCNDataset_5.420.pth
Epoch 827/1500, Loss: 0.026313, Time: 169.603s
Test result. Precision: 2.967%@20, 1.834%@100, Recall: 6.583%@20, 19.885%@100, NDCG: 5.421%@20, 10.026%@100, Time: 5.530s
Save model to checkpoints\LightGCN_BPRTrainer_LGCNDataset_5.421.pth
Epoch 828/1500, Loss: 0.026366, Time: 169.939s
Test result. Precision: 2.965%@20, 1.833%@100, Recall: 6.570%@20, 19.875%@100, NDCG: 5.417%@20, 10.023%@100, Time: 5.436s
Save model to checkpoints\LightGCN_BPRTrainer_LGCNDataset_5.417.pth
Epoch 829/1500, Loss: 0.026136, Time: 169.809s
Test result. Precision: 2.968%@20, 1.834%@100, Recall: 6.581%@20, 19.875%@100, NDCG: 5.421%@20, 10.024%@100, Time: 5.514s
Save model to checkpoints\LightGCN_BPRTrainer_LGCNDataset_5.421.pth
Epoch 830/1500, Loss: 0.026262, Time: 169.448s
Test result. Precision: 2.973%@20, 1.835%@100, Recall: 6.593%@20, 19.891%@100, NDCG: 5.427%@20, 10.030%@100, Time: 5.479s
Save model to checkpoints\LightGCN_BPRTrainer_LGCNDataset_5.427.pth
Epoch 831/1500, Loss: 0.026131, Time: 170.077s
Test result. Precision: 2.970%@20, 1.832%@100, Recall: 6.589%@20, 19.848%@100, NDCG: 5.421%@20, 10.014%@100, Time: 5.498s
Save model to checkpoints\LightGCN_BPRTrainer_LGCNDataset_5.421.pth
Epoch 832/1500, Loss: 0.026417, Time: 169.787s
Test result. Precision: 2.968%@20, 1.833%@100, Recall: 6.582%@20, 19.849%@100, NDCG: 5.418%@20, 10.015%@100, Time: 5.405s
Save model to checkpoints\LightGCN_BPRTrainer_LGCNDataset_5.418.pth
Epoch 833/1500, Loss: 0.026474, Time: 170.156s
Test result. Precision: 2.972%@20, 1.834%@100, Recall: 6.598%@20, 19.874%@100, NDCG: 5.430%@20, 10.029%@100, Time: 5.374s
Save model to checkpoints\LightGCN_BPRTrainer_LGCNDataset_5.430.pth
Epoch 834/1500, Loss: 0.026122, Time: 170.037s
Test result. Precision: 2.969%@20, 1.833%@100, Recall: 6.590%@20, 19.854%@100, NDCG: 5.418%@20, 10.014%@100, Time: 5.475s
Save model to checkpoints\LightGCN_BPRTrainer_LGCNDataset_5.418.pth
Epoch 835/1500, Loss: 0.026350, Time: 169.862s
Test result. Precision: 2.977%@20, 1.834%@100, Recall: 6.608%@20, 19.859%@100, NDCG: 5.433%@20, 10.022%@100, Time: 5.405s
Save model to checkpoints\LightGCN_BPRTrainer_LGCNDataset_5.433.pth
Epoch 836/1500, Loss: 0.026375, Time: 169.805s
Test result. Precision: 2.980%@20, 1.835%@100, Recall: 6.619%@20, 19.882%@100, NDCG: 5.435%@20, 10.026%@100, Time: 5.433s
Save model to checkpoints\LightGCN_BPRTrainer_LGCNDataset_5.435.pth
Epoch 837/1500, Loss: 0.026100, Time: 169.804s
Test result. Precision: 2.976%@20, 1.835%@100, Recall: 6.608%@20, 19.865%@100, NDCG: 5.424%@20, 10.017%@100, Time: 5.491s
Save model to checkpoints\LightGCN_BPRTrainer_LGCNDataset_5.424.pth
Epoch 838/1500, Loss: 0.026365, Time: 169.811s
Test result. Precision: 2.977%@20, 1.836%@100, Recall: 6.609%@20, 19.877%@100, NDCG: 5.429%@20, 10.024%@100, Time: 5.327s
Save model to checkpoints\LightGCN_BPRTrainer_LGCNDataset_5.429.pth
Epoch 839/1500, Loss: 0.026407, Time: 169.842s
Test result. Precision: 2.967%@20, 1.835%@100, Recall: 6.584%@20, 19.871%@100, NDCG: 5.416%@20, 10.021%@100, Time: 5.467s
Save model to checkpoints\LightGCN_BPRTrainer_LGCNDataset_5.416.pth
Epoch 840/1500, Loss: 0.026297, Time: 169.864s
[truncated: 5,482,382 more chars]
