# Supplementary material for: Research on Recommendation Algorithm of Joint Light Graph Convolution Network and DropEdge
Source: Hindawi journal article supplement (doi:10.1155/2022/3843021), 2022-01-27
Supplement: f1 [file 3843021.f1.zip › 3843021.f1/Supplementary Description.docx]

Supplementary Description.

1. The [dataset] data used to support the findings of this study are included within the supplementary information files(gowalla-test/train.txt;yelp-test/train.txt;amazon-test/train.txt).

2. The [Table 2, Table 3,Table 4,Table 5 and Table 6 and the data values in the figure] data used to support the findings of this study are included within the supplementary information files(run-gowalla/yelp2018/amazon.txt).

3. The results of NeuMF and Hop-Rec in Table 3 are quoted from Xiang Wang, Xiangnan he, Meng Wang, Fuli Feng, and Tat Seng Chua, "neural graph collaborative filtering," in SIGIR, pp. 165-174, 2019; NGCF and LightGCN results are in the supplementary files (run-gowalla/yelp2018/amazon.txt).

4. The [code] data used to support the findings of this study have been deposited in the [Baidu Netdisk] repository (Link: https://pan.baidu.com/s/1JUFyBpoc3RPoKkPsQXvXkQ Extraction code: gaz1)

5. The files (run-gowalla/yelp2018/amazon.txt) are the datasets needed for the experiment;the files(run-gowalla/yelp2018/amazon.txt)are part of the log files of the experiment;the link(Link: https://pan.baidu.com/s/1JUFyBpoc3RPoKkPsQXvXkQ Extraction code: gaz1)is the experimental program code.
