# Supplementary material for: Research on Recommendation Algorithm of Joint Light Graph Convolution Network and DropEdge
Source: Hindawi journal article supplement (doi:10.1155/2022/3843021), 2022-01-27
Supplement: f1 [file 3843021.f1.zip › 3843021.f1/yelp-test.txt]

0 795 694 1531 14517 8784
1 24051 32515 21810 32098 2977 22009 26693 26353 22814 3008 35547 22004 21453 36910 23738 29140 25953 37157 17022 11412 2997 15543 31136 26047 30194 9799 17085 15226 32997 36457 34719 36988 26344 3015 3043 31564 35868 36556 22901 21454 26414 36007 17075 7259 21809 22017 17078 17086 35811 3028 2991 12019 3006 17076 22820 4748 15530 28631 32157 28032 6011 3030 35956 26362 34288 3026 24418 31944 34586 4813 28866 35957 26780 21931 14898 28635 4821 32527 3024 32521 32520 12453 26363 36666 21778 37352 35226 9487 28365 10313 36778 8026 21565 9970 33234 37718 21755 31946 12415 37531 21877 26356 12454 15041 34582 32203 14899 15366 32155 31565 15048 36496 26364 15036 26694 6010 33963 15370 26348 17216 32545 26769 10729 28862 20878 36635 4806 26805 4808 35844 37048 37981 37382 36482 10728
2 3465 2920 836 29378 1680 2922 4696 4691 7528 29505 10009 15069 828 987 10028 838 4858 996
3 576 608 1672 2922 10021
4 13 3276 7007 802 4028 1306
5 4399 11571 2701 8921 1646
6 5062 2886 3592 4092 9111 1543 3571 7233 8340 11924 3593 852 12783 4588 842 3628 20148 3426 762 807 4498 5685 8752
7 2649 2648 13962 3207
8 2804 1532 81 1003 82 1540 23618 649
9 4936 2780 3518 3322 4330 13372 771
10 5906 70 5358 8303 843 3314
11 4657 2741 7232 760 1000 93
12 4690 1665 983 3476 595 10028 4680 555 10010
13 3150 15614 15956 5065 18339 18581 3171 13089 7 19682 11414 14621 10441 37412 28922
14 1109 2196 15743 4189 6104 1057 2559 2033 13740 3722 6841 2609
15 949 951 586 1273 12170 1271
16 18423 643 6295 628 1347 1340 1282 3101 10776 13998 8442 1365 1351
17 15070 623 29355 613 4689 24001 665 6198 820 721 2709 2921 649
18 2535 1455 1513 2365 21401 37420 7604 4160 1395 29500 22423 24332 33567 11894
19 1384 2684 4338 1890 1503 1645 3268 1317 1327 1640 3831 4072 4138 1385 10 1598 1660 4350 1438 1251 1658 6184 1214 1391 1425 1253 8780 11908 1990 1639 1393 1439
20 8190 1096 5471 7159 1134 1482 4667
21 13779 6692 1381 5533 11277 1646 1033 1254 6975 4207 2702 6388 2212 20182 8483 12391 7252 9325
22 1157 5239 15335 7827 1659 6575 1478 1053
23 7538 13420 29070 6639 17132 4695
24 6318 10533 646 1724 638 3093 633 1338 1797 1786
25 8056 4844 6064 9967 3089 20425
26 11918 4630 1639 1638 8274 8902 7762
27 10547 12724 5429 13423 10531 3126 2703 5403 18413 15872 14073 14092 33458 5404
28 25131 25357 8832 15679 6551 15263 13871 6523 11576 24332 905 1248 36406 24346 37232 23914 26214 15657 35860 15686 7626 11551 6403 30036 15669 15680 15666 15672 8376 19127 2523 37237 35308 37139 25358 4473 23282 11661 11963 18135 17424 25348 7986 34958 20452 35543 37261 16950
29 765 4237 826 88 1940 5870 4900 3625 96 92 93 655 1709 855 1005
30 16430 5480 7123 20798 659 4030 7043 7098 8078 1190 15321 1236 7019 19363 7184 22871 4015 30375 36189 20406 26840 18432 34457 10031 5100 7126 20407 24345 10
31 1477 10361 7786 6609 7699 6117 4451 2445 1465 4076 1397 1478
32 989 4693 990 622 7661 4674 1312 573 10291
33 2740 771 772 2866
34 11833 31907 11246 1078 902 2519
35 851 823 2900 1940 826 674
36 649 710 2255 5907 1800
37 10934 10130 25669 37166 20538 26171 5453 10931 26172 13820 21867 31974 30919 1425 12755 20192 13760 31274 26170 25322 15683 3235 31975 23153 15294 35992 34406 34142 17185 11865 26094 26175 6431 12341 1506 30451 11082 13317 35790 25387 16935 20716 5786 22026 4665 15652 3726 14592 32049 12005 27820 8267 897 3363 25330 8813 782 1705 15688 24377 9826 13311 7250 4384 7394 34118 31841 3294 26157 7508 12930 26184 7491 15321 26178 20302 11965 34459 7918 26182 7191 26095 7295 23474 26183 4387 4133 15665 26173 6487 35248 9818 9026 7560 26187 35837 19741 10900 26179 26190 20683 14589 23882 5031 25665 7900 10270 12070 22035 8725 7627 37186 36077 13859 4139 1330 15664 11857 32636 29346 1478 30368 1642 26180 11994 9743 13312 34323 4170 15298 22438 3729 19898 9349 12762 9905 28721 5787 36441 28433 6695 14736 36844 34345 1257 5599 4873 25329 6231 23570 33993 34307 1401 31691 33818 4322 7570 31690 13470 34201 12056 26058 7624 4266 36743 19216 37751 13476 37791 12923 36098 7472 37257 7482 34322 20044 8827 6576 10951 8723 31180 25810 5265 36060 37753 37976 14749 37315 12310 32183 9446 28954 7178 6290 7498 15682 35794 5130 4205 33392 1104 33056 7003 8860 8840 1103 4669 11832 11983 29434 15687 37566 36643 8475 7622 22871 11517 8718 35796 36611 23584 34325 6682 36915 9752 33447 37098 6666 32604 26177 15648 34324 30106 8832 13310 1030 37808 33883 37537 8826 35939 11839 12932 7506 13832 23569 30572 10131 21224 38016 11492 37732 7633 35699 26440
38 2643 5156 688 2947 3701 731 11355
39 3427 81 69 10731 6278 760
40 20991 4685 3048 3836 35021
41 1057 1480 12009 2045 13094 2449
42 2761 18404 21581 9551 1029 1256 7108 7 6188 12933 1614 26387 32372
43 18153 770 8665 14565 2815 7357 2819 3257 818 87 3430 14406 9624 16386 11290 6653 15 10191 9543 8669 12017 12825 7262 8064 12827 7880 9577 14643 13016 8345 8752 9986 3045 7659 5340 11295 9568 4331 10208 2908 36380 34160 24113 12788 8873 33157 31368 17327 26627
44 713 2765 764 2836
45 9788 7038 3278 1034 1103 1043 1036 2806 2902 10395
46 20268 90 28983 3648 2725 7963 10384 12598 7431 3632 3802 3615 8633 3801 8683 8635 10417 721 2787
47 2786 22105 773 2014 5021 4940 6651 3803 5172 8318 21829 9191 6765 31189
48 1006 2744 2750 649 1949
49 5266 3 7150 2683 7
50 566 17106 21329 18848 36735
51 2781 2791 9 771 2799 709 2806 2774 1306 3121 29325
52 9490 8528 3332 5158 21716 471 4510 10589
53 7573 709 4294 4244 24714 3490
54 1156 799 1333 15274 31691
55 350 26362 37718 47 30194 437 36813 15377 9508 32157 34288 35577 12419 21598 9513 31133 28634 26047 230 37911 459 29416 12468 32099 22018 29 29415 32100
56 7938 1015 29277 846 8690 773 4929 4963 35257 10480 4274 21625 8346 3678 9284 11418
57 10290 20625 3475 19033 3061 20400
58 14058 8878 11888 14246 5415 9616 1340 1794 1787 10574 1782 5409 5412 5404 13988 14026
59 27189 16561 18194 2806 4233 2782 11120 709 1717
60 18009 17879 15974 17593 17464 13201
61 16578 16762 16099 20836 27600 18713 20776 3918 3958 16181 23370 18121 24948 18187
62 18034 755 4065 16254 6366 28922
63 2525 1949 13929 10969 4398 21501 11351 2515 2587 2544 5642
64 1445 13790 12777 4726 10608 8649 11300 18674 2766
65 1803 1443 3423 760 2720 4200 4555 1688 4873 1482 2772 1860 4911 8232 2756
66 23347 21283 2889 6412 1803 5072 5054 4772 4963 8303 31657 8109 30641 1017 15112 18928 31663 34940
67 765 685 3496 4904 82 1739 3109 10703 12719
68 1717 2711 93 1718 3490
69 3542 4015 9629 1566 780 10657 7254 20066
70 20186 14307 4959 1444 7873
71 16428 1053 7944 9800 24678 4372 10592 7098 7506 2460 10940 18361 11983 16984 5753
72 940 4039 7213 8121 4041 9071 4048 12302 7270 4053
73 7499 4348 5541 4513 7800 3707 1091 1837 6212 4563 10712
74 3999 18457 16080 3184 11650 2902 7884 6651 13372
75 5886 17313 8162 6282 15765 18031
76 4482 20683 4268 13919 2372 5833 6403
77 10008 5164 23894 10026 23998
78 2708 1549 769 772 852
79 82 721 4800 93 19399 4707 4530 1598 13 4228 4384 5339
80 4933 8626 7433 15806 5353 8656 2845 3305 11055 1018 6046 21821 23885 13953 3802 8984 8425 8317 2809 8638 11403 852 791 8645 12609 6057 9555 5023 12919 3804 3312 8640 7162 14919 662 5857 8326 15425 14200 12017 5024 10442 12774 33659 12896 2801 5063 8343 14319 8690 9564 16613 2927 7245 17744 9111 4999 9567 13441 10500 9199 8654 14412 19470 10589 13034 22411 8677 28437 3771 10452 13025 5395 14454 17743 37961
81 1888 20218 13718 4872 7559
82 4483 15104 693 2842 10077 3495 7424 698 7947 5663 7908 4621 4180 3753 12993 6565
83 1482 15249 8907 5085 8781
84 33671 14206 25060 14563 3074 7079 10832 8406 9557 8626 4998 3312 31317 4911 10614 1444 31166 4977 5172 25014 7647 15143 28684 10416 21833 4803 12609 3253 9553
85 8574 1145 6110 5640 1797 1385 780 10857 5229 2961 2179 1518 2493
86 25785 27181 11464 11473 24818 24819 23518 16546 17818 26620 27322 28574 17809 23175 6320 33888 36986 16652 16165 26305 28578 3189 27385 17799 17735 21740 18953 29465 24760 32535 24142 16287 36358 33639 17802 35174 29306 28577 28319 22717 28491 18732 37396 36272 37816 25709 27623
87 4167 8804 17521 7899 4543 8759 20060 8811 22599 8777 24683 5533 12707
88 6284 17270 2655 636 2660 6282 11197 8517 745 10148 12252 2651 18026 20932
89 6211 1143 1136 1473 13873
90 3604 16976 4971 3515 6844 33249 29442
91 2638 3422 2134 15 26601
92 1220 1828 1117 660 2037 7047 1045 11292 1623 7485 8216 8176 1235 7902
93 1134 1971 4386 4561 1455 1482 1253
94 2033 6186 10246 26217 5826 7195 9710 5090 5805 1465 1471 4346 6174 7902 1385 2671 7752 1923 1149 11083 8187 9894 1037 7558 26077 16590 9775 13755 37992
95 8938 2162 2045 1812 8201 892 852 1846 580 24598
96 9501 24935 2902 3245 8281
97 1253 9729 1456 1322 4027 1141 1761 5826 1125 4559 8268 2682 1647 30782 4548 4478 1320 1243 7470 4338 1401 1471 4630 7802 7450 925 1255 7195 1661 15234 7196 2345 1466 13295 1245 1248 6575 4073 1484 7822 3294 1134 7497 9471 1492 11576
98 674 7956 685 2818 2638 6878 10105 6049 34469 28204 29974 21467 33169 30030 18765 35944
99 811 762 786 9545 9224
100 14890 1952 1116 2202 4102 4124 1556 4139 18001 1459 6688 15253 8891 4036 927 7193 1250 1798
101 693 649 2179 2640 29436 1937 2801
102 10896 783 786 2806 3782 1018 19453 9988 1017
103 5223 1808 1084 1718
104 3515 3503 2904 2882 3551 3597 3634 2895 3641 3695
105 4996 3246 21460 1826 1003 1683 3426 8036 2754 1682 721
106 929 2593 15149 5461 2255 1406 3373
107 5318 1044 4469 1045
108 2742 3647 785 3600 4939 6385 11733
109 6085 6587 1593 1821 7198 5225 4556 1102 2199 7485 2910 3265 3455 929 1048 2236 3745 9689 6635 5226 5833 5204 5203 4445 12817 1110 4404 1258 4144 6684 4477 4422 1073 7777 7791 1327 3425 1404 1561 4267 1428 11745 1458 2186 1455 4614 1250 1465 6262 3135 13714 10643 3542
110 904 4183 7751 1474 12383 1496 5513 10712 4544 14969 1259 3379 15305 17408 1598 11311 10660 12123 20225 10634 9851 7699 6391 10249 1481 2189 5363 22586 29155 28794 7074 1329 13304 1115 4654 12993 20700 29892 9395 11660 23280 22890 11552 13308 26560 6558 20538
111 2814 2745 2182 2759 669 2787 762 31225
112 5053 813 4501 88 783
113 12782 845 20639 2889 24456 3245 13499 19847
114 1459 6234 2036 1320 7196 5 10743 4610 1077 1330 7092 4022 1321 1639 7195 1458 2682 1136 9710 10092 1164 5218 1102 1472 1244 7752 7495 1483 2484 7519 1039 928 1104 923 13721 3379 1253 18320 12131 23763 15147 22486 8267
115 4355 1072 1578 9209 1048 4027 894 1118 909
116 2012 6951 16603 17368 19409 6307 2245 1865
117 1134 1391 1649 3167
118 84 1860 762 93 15415
119 17524 480 10929 776 2781 4500 25895 2741 2927 2765 12859
120 9700 9342 11884 6070 1506 15113 4320 6447 2914 6391 11016 17286 1322 10686 4445 17669 11549 6481 14994 826 2706 919 1818 14683 18317
121 824 662 2050 10941 4882
122 14460 36713 11840 1219 11510
123 12256 20549 578 608 982 9485 10275 12587 3091 1677 13958 10028 839 8139 11 1532 4657 3495 1940 10303
124 17132 19057 13959 991 28861 34209 614 606 17093 10277 10291 20240 2168 37529 11286 4811
125 13938 1640 6176 26439 13007 31730
126 344 5991 32895 375 26800 21980 12841 33165 22901 99 24704 28273 32202 22002 26400
127 16236 25762 15994 5251 18715 10698 22715 9638 18193 15846 21827
128 1540 12843 2781 2806 769 868
129 5230 4331 696 7779 5485
130 26 5984 5943 16229 5940 48 3029 25415 5970 476 181 17062 11442 119 5936 234 9593 153
131 36718 986 992 4684 554 577 8459 828 4692
132 3279 4587 20026 15 2706 81 22133 10896 821 3133 7130 3245 710
133 3628 10191 774 8750 2756 10457 22199 4927 9286 22679 9986
134 7469 1245 6228 4435 18696 11917 7822 22997 10949 1642 6433 1435 1057 17279 7509
135 4472 1393 6601 10691 7038 909 1243 1240 5465 1244 32041 4630 9751 1318 10093 1143 2494
136 9250 8278 33307 1538 27837 2859 10823 22119 14319 22174 5024 15700 2182 9273 18844 12017 11403 5322 6142 11804 17641 25893 21849 3313 31818 6659 14410 13793 26817 7828 15059 3479 33453 22411 12807 21405 21357 9286 35429 28965 37606 30521 15479 34609
137 738 2769 1684 2014 2739 762
138 37463 2 34517 28122
139 2944 4503 7261 3245 6717 37393 18174 1860 13372
140 3647 2182 4506 3245 12921 3680 3627 5322 22129
141 2770 1006 1015 2780 2806
142 10659 20172 922 7631 2417 7509
143 9551 18706 8509 1011 22411 10850 11636 3312 2014 5395 10469 5669 8667 8517 6385
144 3598 6753 28581 18874 20671 3174 3195 10379 2869 9256 2020 4990 703 1541 33253 7260 3290 3807 861 14424 852 5025
145 16384 814 703 2902 2949 8154 714 4007 31707
146 2165 14751 2131 11916 29090 11308 4026 6191 17373 1646 3273 7191 1050 1110 2255 9694 5805 1207 2333 894 5598 11590 6499 4252 4134 4124 27011 4138 4455 8716 4352 1111 4628 1218 1838 14238 8891 7342 1389 3454 11291 4270 6534 17531
147 4506 786 8281 10749 15
148 2005 12925 3702 1482 20235 1134 7153 1089 2632 1472 4667 23295 1524 22171 15669 19322
149 12179 12174 20430 31930 28816
150 35425 23918 30776 15141 12166
151 942 3399 3412 952 949 3411
152 8016 4791 786 6197 2179 15027
153 1078 4435 10327 4483 1109 1321 4327 1716 1628 824 2643 2724 2787 4443 3426 2800 4991 6671 1253 2748 4144 4488 4143 1122 1401 1455 1658 1459 11745 4405 1460 4126 1102 771 12 1458 927 11017 9757 1465 1149 1245 1152 1330
154 3595 2944 12155 2905 2798 690
155 2902 3171 4546 1072 2134 769
156 3245 8693 9989 649 5020 1541
157 5639 1398 5833 1385 1644 1317 10721 11684 14639 32172
158 15951 8228 11370 944 9071 3407
159 29104 2804 4303 3308 13418 2841 7434 13247 6198 2895 4963 5398 4502
160 579 9943 6641 10027 23980 8007 30509 8058 10037 34212 19046 23931 10910 12174
161 16852 15092 22229 30150 3784
162 715 9501 20510 13019 37337 2904
163 24263 3683 4915 10822 10490 89 4080
164 2801 2170 18844 13676 7247
165 89 7881 22262 10372 9261
166 20546 903 1046 11712 1056 10591
167 24402 21794 15542 4311 9917 21436 32266 21454
168 5054 9574 31222 28430 14408 18628 10217 6655 14521 15163 28756 14394 3788
169 10531 12284 17549 1280 1788 16749 9618 1340 17839 12735 11887 7737 7835 10706 14249 14246 642 7674 1792 22623 1281 1360 11776
170 11877 3226 31884 30949 20008 31180
171 2740 649 811 9559 6119 2012
172 8034 8764 17245 4260 7913 1418 33410 19737 6421 12930 7786 12145 8853 2535 1259 2141 1176 8830 20810 9834
173 4576 10651 2836 9366 3129 4994 827 5871 3541 81 999 1446 2967 4310 5016 3572 845 3763 7722 2787 3591 3645 6708 3585 3608 2818 1716 5047 1627 2801 3529 11068 783 12316
174 10716 10772 1478 6974 7176 13301 12855
175 1073 2337 1379 1040 1482 4334 1650 5119 3334 9093 3262 5114 1140 4178 5619 5620 9712 1427 1166 2683 5577 4879 5813 2165 4880 4416 1141 2134 1045 1611 25470 5579 15279 1114 3542 1058 7915 4202 1210 1510 1204 1251
176 286 3026 15368 29718 17084 17081
177 1385 15843 5813 4022 1887 6572 9903 2683 1442 1422 1428 4034 1215 9095 7924 1848 1426 1613 1488 4437 6225 7916 1400 4017 3712 1223 4707 1380 1107 1152 13818 1393 3264 802 1482 1185 1051 20226 4202 5142 10845 1383 13758 10317 1204 10305 2487 5084 1229 2933 1379 5194 1188 1699 1429 5748 1134 1146 1841 1058 3288 1116 4023 9321 9677 13225 3826 5202 7923 6665 2466 8192 5195 7468 9872 2274 13217 4259 5085 14976 4177 5906
178 11375 2747 10158 20459 4083 6733
179 5800 6652 9336 7813 2876 18626 674 30885 12530 26699 7423 3418 1445 851 10390 700 765 1708 3133 6198 10801 13418 7704 676 2641 816 16382 1542 4656 1002 4864 15080 8605 4899 8 868 82 814 87 1532 1682 4278 2736 4956 678
180 1797 799 1099 1594 10939 7480 10671 11274 12032 7202 28082 3724 7204 2080 2059 4336 8195 4032 1817 4154 20727 14776 1454 12304 8884 4258 6217 7388 11562 1843 5451 2632
181 10802 21685 783 10812 11804 19007 7704
182 1971 2212 1471 1255 9757 7558 4454 1142 11081 13119 1463 7889 1102 1322 1250 2603 6681 6196 4015 15115 20709 7032 14611 2236 1187 3217 1050 17187 1388 1090 1386 1637 1031 1810 799 6666 1482 1053 10787 11505 1244 1049 1066 7627 904 1146 12328
183 852 3066 7323 3081 2825
184 26698 17692 13605 18641 30118 8666 7949 33390 13438
185 1585 11353 10874 1702 1053 4301 9778 1032 5 13484 649 7130 92
186 2836 716 3593 2835
187 11340 3208 8165 21036 19968 9044 749 745 883 2660
188 12 6982 7338 1611 3045 5488 3 2798 774
189 709 852 2720 16790 24537 3179
190 6797 33246 34372 8330 17691
191 9515 306 24026 53 21964 35855 35852 25 2990 17307 21987 18694 32524 32286 21709 26351 28626 438 9590 21760 18887 24051 17020 22380 4836 21735 17086 17047 28478 21712 37434 32700 9551 36727 35472 32419 34851 17076 17319 36 37869 361 532 35827 33966
192 1446 17786 22750 883 26598
193 2647 7927 11186 3355 7835 5883 5885
194 10420 8326 2015 8329 2902 5176 7453 4804 28756 5801 703 10232 11068 33347 15426 3574 14209 27943 7245 10464 6531 2482 1385 3049
195 781 1715 7153 1040 3701 2736
196 997 616 831 2921 619 553
197 25112 1491 3462 1484 1466 1385 11559 1414 9826 8950 7196 927 31726 14842 14892 6249 2010 1146 17395 7988
198 2765 17684 1015 804 774 2768 715 2781 693
199 7873 19672 9265 11069 24455
200 774 785 694 3417 2754 2801 3495 5147 3626 771 2941 13391 16939 6475 7424 6658 5691 1711 4510 29977 773 4280 2015 15 1010 9621
201 12866 770 3246 2790 5150 2786 2781 3490 715 12779 785 2891 774
202 17548 3417 685 3482 88 1933 701
203 1221 1057 7937 1073 1104 1598 8267 2701 10877 1503 13253 7798 5090 9762 10659 2445 10623 1647 3831 7341 4517 1046 5462
204 87 811 13 4501 6925 768 736 693 4200 7777 2028 1256 803
205 3083 855 7585 2707 765 6672 5273 4711 721 773 2847 4503 8634 7653
206 16 2763 724 2770 2796 2785
207 4488 2082 16923 19739 4603 12304 11828 5138 1421 15809 13946 2090 8762 13411 17164 25238 3731 12529 1929 11830 4513 15825 17414 11822 27753 1506 20565 3048 10665 20666 32116 11291 13739
208 721 2012 3605 34914 1716 3129 1002 2179 2718
209 5799 31033 5726 768 4158 6654 11892 9282 33557
210 7298 15258 23754 12140 7037 19361
211 14946 6656 14161 3259 1017 3087
212 11 92 20237 703 2713 827
213 751 21111 31949 15788 36604 28565 10181 20244 3836 8159 31775 29380 15789 5030 20607 13617 3214 21059 300 7723 18679 26838 8109 26884 13366 32357 11140 16393 11179 21083 35536 7838 28552 28422 10188
214 4648 5225 10746 1134 4483 1506 4534 15272 1441 30279 7989 8850 25135 5121 7699 34973 32373 33800 34112 18135 12270 34111 37079 29173 15682 9001 2210 30035 25461 26180 35059 15288 31285 4217 30392 6621 33433 23764 8783 34120 23156 25560 2971 37417 29171 24262 10743 2365 36047 1038 6215 36528 12860 7888 11745 26328 26516 35698 16449 12932 23158 20022 9574 4509 773 8696 4980 8406 13035 15 11958
215 1636 892 9020 1682 4621 5201 9747 1084 11615 2428 8762 11598 4705 2929 20229 4994
216 8093 20610 8110 12229 10155 10189
217 20305 5108 1595 1576 2969 1459 1971 1053 1846
218 6104 6070 6108 1521 23556 9810 11545
219 3048 3421 4914 5041 10942 764 87
220 3244 657 654 9622 12
221 813 4313 17664 14870 19268 24904 8509 14296 18379
222 5685 2179 771 6651 665
223 6408 8139 19055 34073 578 20626 4686 566
224 22197 8329 25409 3248 34257 22201 2812 13036 17919 1682 22141 81 4312 15 2782
225 11290 76 648 762 852 9501 795 9989
226 5872 1707 11803 25920 18766 11118 2951 2733 696 4495 12014 6982 9805
227 7751 660 1561 1971 908 1034 1045 1598 1060 1142 1251 1828 4126 1112 1134 1451 4072 1109 1145 1410 1972 929 4398 1104 1194 2156 909 7341 4374 1052 1044 7911 5744 7786 2671 5143 5761 9717 7277 5219 8201 9097 1383 3294 1176 1515
228 7313 3602 1707 0 2869 3678
229 13071 5873 2134 2701 659
230 2014 8404 7425 5020 9624 5175 5023
231 1000 1015 12 17 2937
232 10797 1006 2785 2740 1003
233 1707 3304 5854 1005 4913
234 7354 5517 5605 12928 13854 11511 5206 5205 9023 11624 34981 13078 7901 8212 20357 1210 5247 9773 2683 11505 15250 17235 22618 7285 6606 10791 22664 1635 5094 11622 1032 7471 1253 1631 1928 7925 11029 19944 8714 17243 1030 8762 1612 15331 1087 24718 9017 7415 15744 28785 1128 2765 21232 2964 7941 8216 21828 8319 4978 11732 4247 88 12902 4990 7956 11043 2793 2779 3083 8 14198 3085 4667 5493 649 11677 11675 5113 2687 10694 11584 11606 8796 8037 4882 2788 2742 7545 9698 17685 4094 22415 33987 19151 9118 7355 4879 4546 10100 14302 10101 29763 3 4648 7787 13887 3047 11659 17244 11619 20040 5560 4106 7918 1558 25979 2147 3425 1602 1818 780 1428 769 11106 13 15147 1918 82 704 87 15 2322 4217 16935 9688 12714 26746 8383 2072 15717 3264 9736 25977 10593 1542 9168 16390 1036 16361 9153 3496 5196 2949 8551 4791 4524 722 17410 5721 868 1718 14993 674 1532 5489 92 24130 3707 7775 9158 3495 9697 7940 1682 0 6633 8795 13944 93 1053 9846 3730 22587 5242 11594 1046 928 32174 2034 15746 1950 31938 9020 3371 1633 5907 26982 2155 906 5619 6694 9712 32605 11498 22032 11605 2705 32092 15710 10949 8381 8817
235 10247 1119 891 10717 1481 1033 6239 13406 1509 7769 1409 9209 13401
236 4644 10350 6408 1474 4602 21872 22385
237 1003 4497 688 34947 8287 25138
238 831 836 566 12201
239 5260 946 4053 11368 4982 3400 931
240 31742 5327 17618 19908 24874 33653 5389
241 11 4327 7155 5110 765
242 13249 12162 5063 5327 36736 5323 14946 3655 30067
243 35361 4503 14769 7552 9461 32728 8948 2781
244 945 8129 8131 5183 36343 34030
245 15020 1413 5265 1504 1865 2475 2191 6695 2110 2086 1422 8176 18696 731 11355 846 7956 3707 6422 1816 10244
246 5271 3618 3218 1696 2259 4933 11816 7595 4280 3300 3628
247 1673 619 558 1310 4682 838 1672
248 9501 8925 29679 3146 18384 17326 33361 2801 5405 36319 11778 29325 632
249 8287 3 655 12 4731 1025
250 4158 1520 4299 1134 1108 1065 1837 1056 1481
251 3520 3516 3667 9505 24619 5278 5721 25106 18634
252 9893 35110 14870 13014 2942 2742
253 17908 18345 13522 20118 20945 16236 13520 27272 13087 24535 20843
254 5072 3277 4233 1445 2748
255 4979 5012 2897 8706
256 4463 15306 13311 35276 26095 11258 17556 1875 1460 35543
257 4865 3129 26782 7715 2836 2877 5666 3591 18105 2967
258 2032 20152 8866 14794 22427
259 22129 23845 11286 783 11732 762 10847
260 29117 10478 29050 3300 703 8334 2801 4999 18165 13018
261 711 5048 1546 19834 2806 2327 11498 1950 36455 19204 2174 2371 2244 11563 2529 15746 11681 1890 10885 20140 12073 2111 2038 2119 1799 2590 34430 34426 2319 13838 2154 25185
262 1046 14418 33588 30376 2482 37261
263 4339 24351 1104 30810 1449 5327 28725 33158 1157 20074 20321 15664 1134 37426
264 3269 5745 908 12076 2251
265 8856 3713 6387 10720 10321 1127 6982 17482 7786 11486 11480 9522
266 762 770 4270 2134 1042
267 13547 20148 11690 1004 3256 8604 3483 7454 2050 15146 8399 5685 769 15145 9989 11505
268 8034 4877 19361 2523 2373 1377 909 2409 1248 6223 930 1499 3294 2094 1981 11982 6442 14690 7395 4555
269 3422 19649 2874 3133 2956 94
270 5254 3379 4881 1055 28845 4872 5084 5099 22261
271 19620 6269 2706 4331 11073 2791 18632 9253 2897 2934 3701 10849 5506
272 3985 8702 3351 17752 18915 4557 36501 26333 67 808 1682 22131 4302 3788 773
273 889 4160 1084 4170 1798 2609
274 1877 10773 13 11629 7766 28700 1220 37247
275 2365 36867 6108 6557 11966
276 8412 12164 13544 4963 4275 33541 30523 31222 23840
277 6203 10708 773 23476 8281
278 983 12257 6067 29523 583 4849
279 29206 2904 851 26870 1018
280 5410 625 22908 786 3750 6220 4428 1056 7194 4339 3117 955 24853 636 6339 18208
281 1431 4131 7775 5805 4194 4483 4389 7897 8194 4114 8224 16744 1252 1478
282 3422 824 3760 3568 3626 5057 3767 763 3548 24936 3248 3772 3695 2845 4907 5656 3590 710 4306 2725 3636 2859
283 16484 21580 7259 3179 8 8171 1551 7652
284 11926 25610 14256 1774 13981
285 6136 5354 4081 9136 6719 860 4101
286 1133 7985 4881 3449 5516
287 1826 787 69 4709 649 1992 6645 4331
288 32419 17326 2678 26555 12328 19322 25866 19998 16687 7504 31180 8180 11755 2828 26618
289 6576 10659 9746 5103 4350 1476 6090 1240 5120 1482 8733 7826 11859 1330 10254 6575 4464 2632 6220 11018 7469 4409 4463 12529 1244 1329 2700 9751 1257 10249 3831 1254 1496 3379 2685 14889 4211 9776 1321 11325 4339 20680 3275 1253 1245 5536 9702 1175 14588 4445 3827 1104 13132
290 6773 2641 6151 1443 31880 5658 7741 8615 5688 2866 3304 9211
291 10449 2787 4979 3051 11652
292 1119 1257 1244 1053 1383 1637 3379 1481 2952 10730 743 7608 1657 84 1482 721 2902 22111 3313 13 2609 10122 13328 636 3444 758 5895 13352 6351 6369 6317 23463 4685
293 768 3788 9501 17722 5339 3057 3245 4588 31494 19709
294 14340 8677 4586 9569 2176 3130 786 20510 24461
295 15789 15832 24571 15792 6335 15781 19247 23467 21047
296 10115 4899 2714 5358 2709 1545 649 2725 698 1716 2866 669 709 2711 721 2848 7960 5673 12062 4500
297 769 4313 2748 13 14279
298 6152 2902 19709 773 3424 3587 6198 2012 4101 10159 4294 23224 32883 13035 33444 4081 34424
299 11510 2458 36017 25677 1175
300 9132 3633 9171 4310 12938
301 1204 10654 7341 6666 4476 8236 1655 15259 6214 1654 5468 6117 8257 6572 3752 2445 5 4453 8267 10877 1855 6106 1478 7309 10969
302 4024 5585 919 1234 1059 13944 1428 5238 5100 1581 1565 2131 4407 4270 4122 6690 2466 1043 7000 1961 1611 1121 10628 2728 1422 1227 1036 2912
303 14870 13337 8164 624 10264 7855 6315
304 5905 1443 2928 2720 657
305 4443 1415 2259 9349 9928
306 1624 1038 1560 8836 11617 2064 3725 4529
307 7247 4912 8340 71 22110 9972 7982 13662 5503 11733 5382 3309 3783 5356 10755 8658 7594 28091 5023 13587
308 5097 9898 1091 6702 1967 1145 6636 12212 9612 7398 5765
309 3483 300 9595 22381 8369 10 10964 9414 3245 9578 9571 8345 2806 852 8752 6500 1496 13871 6211 7155
310 11882 6634 2141 7403 9521 7800
311 20427 10017 37112 24865 20429
312 2713 2820 2897 12 5069 20055 2012 2766 2806 608 586
313 5040 812 721 738 3626 8015 7393
314 233 16760 417 201 4818 4833 12441 34384 24412
315 6989 783 7337 5153 3760 9726
316 6197 4332 769 2902 1004 1626 2787
317 1794 1775 10547 8497 1356
318 4843 37937 23988 27817 13958 28153 35771 15070
319 769 11595 2815 11 4994 1002 8287
320 9503 3588 5271 2179 5685 666
321 4546 782 661 780 2699 8793 1157 7491 891 27865 33889 16063 26957 3194
322 1002 807 710 999 23710
323 24440 19242 34629 19829 23029 33958 22188 6590 35189 38026
324 36154 4987 1633 28857 26920 26430 7270 12170 4692 28345 34517 4985 4988 34029 934 34476
325 19614 4326 1934 8675 1855 16987 6972 1089 2635 868 1221 3419 2706 8437 8295 703 12118 5656 88 18706 18959 8871
326 10000 13365 32850 9876 36901
327 3281 721 855 5685 0 669 2772 4980 729 657 2769 3518 2877 2874 7545 2801 5020 5018 7880 2809
328 1654 1187 8483 1145 1638 2088 2686 1114 1463 1182 2196 2161 2123 1035 2144 11962 26253 2482 929 4646 2429 8720 30295 13763
329 9730 8254 1518 8963 1329 3839 4402 927 1068 4548 14969 1165 1257 1057 4015 13814 1441 6159 10660
330 2548 1244 1130 1630 8764 16245 1317 6939 1594 2706 13627 9768 8763 6154 8483 11101 6971 1556 1893 7123 1518 1493 1257 10787 1256 10882 6187 7580 1242 4939 3651 17423 2202 3075 7890 785 2803 22513 8012 8413 6123 2737 2761 12769 26065 808 5690 4998 10378 2889 17280 7647 23939 4084 783 8409 32445 5049 3317 14393 35545 773 743 2886 27798 762 5342 3788 842 852 28410 3593 8412 7408 25245 1853 696 3612 5319 2835
331 19709 2797 7428 8693 20342 4502
332 6659 14391 4502 6764 14652 9564 9989 16618 14959 9569 12116 13025 7387 18936 2735 35220 3156 3316 36817 10482 13036 13032 29053 12675 16623 11636 26012 7239 31713 33560 21410 34555 23686
333 13891 23555 11486 21872 3272 7993 11661 15321 26327 13293 30348 32195 29801 24675 31118 2541 13893 5538 19896 9764 13626 11488
334 8693 796 5173 5322 2772 816 5024 14360 16612 14214 14654 9558 2853 9562 6761 5868 22272 13770 7428 9580 5396 5398 9989 14387 10505 21745 20398 3074 7239 5235 12330 7957
335 17202 4687 4673 10013 558 13420 10015 3089 994 30777
336 2902 4332 762 15 14642 93
337 2874 81 2897 4705 1018
338 31001 23984 603 4686 12180 26708 983 4846
339 13922 14689 1971 11995 20303 2222 12027 26166 8069 21267 4106 8933 1178 1175 2056 8909 7965 4555 13760 11983 11962 852
340 34186 15 2902 773 8409 2706 2803 22640 18423
341 8329 11650 8665 15390 32510 3600 1538 768 12938 5685 3245 36154 8129 9987 7545 21154 7984 8436 22781 8131
342 710 8399 21795 17266 11209 20823
343 2842 5235 3305 11729 6753 3647 7052 96 800 6845 9012 4233 6763
344 5486 12337 15111 18319 2309 8849 21596 13750 12147
345 11007 12770 654 3277 774 14567 6735 3318 10427 12639 2941 9232 2897 5149 3503 4500 740 5669 3127
346 20219 12389 2394 1960 7569 14741 26151 20223 2411 2374 2078 2262 35796
347 21909 13426 28025 5033 15990 8702 8509 15062
348 15513 11894 5685 4709 5656 13446 8428 3511 10452 2795 4502 3638 8427 3063 4726 9569 14949 9577 10191 5246 1717 19719 9893 10422 7428 17743 9578 21863 13018 9289 14377 10236 18175 17055 23501 12906 5378 32874 13033 12894 12329 16379 17632 14215 17913 11636 14397 16979 24905 28719 11290 7262 15449 3490 22096 17639 14432 28057 10462 12825 15436 12830 5022 15444 24452 12330 10510 21408 13372 15448 9559 9570 13032 5323 22781 2815 10470 9989 21527 12613 2865 23848 29053 15472 35666 4509 28963 13035 2783 8436 2023 28847 21409 772 28966 33562 22411 20400 31713 770 10316 24461 30210 14416 20436 8756 703 2723 24450 12679 25857 9986 5023 37170 32139
349 3129 10192 7211 6674 14348 10832 12315 3430
350 783 1529 762 3045 3259
351 2853 31876 35596 5063 34447 3800 79
352 2092 2360 6213 2262 26840 4487 25495 1580 929 12077 900 2492 7193 13860 12763 2557 5731 15321 36388 6695 30572 22035 2329 3378 14978 13833 4415 743 2524 6492 1258 8475 15681 32256 4544 2294 9651
353 774 19667 12886 20240 10208 13025 9501 32943 2782 79 10496 22281
354 1089 9313 1098 1102 8222
355 7160 37629 1524 33092 25140 21559 10685 20077 21200 9473 33199 5199 2508 3839 5605 24334 17209 4178 23770 15148 24686 3725 1521 7042 24677 13885 20284 29657 2628 35387 24676 29435 30249 4018 13856 15669 781 1157 10591 6575 11516 6548 6974 17054 15686 11688 2607 19211 18156 7133 8252 5635 780 24365 9704 25928 36845 4015 37685 5565 26847
356 1410 6072 1155 1031 1817
357 2012 1534 14364 2866 9501 1540 4505 2754 12679 35207
358 13528 16188 15996 6320 4777
359 8251 12581 12369 14737 7517 19567 12854 15317 8722 7465 2596 4388 23813 8484 4187 3236 1245 1220 2045 7398 1487 1979 4798 17122 13071 768 3227 4326 782 1248 852 7247 5454 6998 5487 14160 12935 1201 5471 10128 2704 9614 1980 5222 1256 1257 4498 1056 6939 1840 8483 826 1478 1365 12724 1367 13907 1878 5536 1772 1847 6649 17548 5001 17245 685 25528 4557 28027 13770
360 21258 28378 3608 32443 30632 28973 14163 17605 15399 8322 32989 35199 37834 37641 19571 19570
361 10090 1084 6092 6394 4376 2082 1109 4361 28769 10349 7176 15580 16454 14637 32019
362 8667 4981 5361 28142
363 5645 1103 5219 1422 1193 659 14590 1030 1072 919 5778 7201 11562 6 2093 8780
364 7123 657 6241 11615 710 1532 2786 29143 1095 11986
365 6430 11288 2604 15656
366 2928 2014 715 774 2902 2780 3792 2897
367 4685 10584 28916 11192 11198 20879 12558
368 9991 749 8515 6301 8159 3436 16254 8165 28558
369 3128 94 8284 11032 25175 82 2964
370 6687 11849 7035 1602 660 802 9738 7153 6103
371 2808 19468 17369 1728 14449 9501 6653 18763
372 4486 7509 16585 3722 17245 1129 2628 31579
373 3268 9009 10355 9228 8997
374 27487 16571 17883 13516 16515 3191 16164 6325 20166 14871 3179 862 4795
375 1030 1026 5748 4209 4399
376 4094 2765 2635 652 3645 5829 2718 11894
377 4991 2635 714 2909 8531 769
378 2012 82 3427 796
379 1715 9653 5538 6221 5568 5208 4412 1586 1082 1093 9018 8222 11653 9729 8795 11328 31665 30526 37845
380 8434 8419 5023 11705 2862 14411 15491 12983 15394 14360 9989 15560
381 2896 17609 29216 6740 14180 32966 8593 3562 14963 20573 13562 6770 10695 6965 14173 20337 31633 6783 13241 30703 6803 7163 6718 16978 13039 35863 2873 25035 4280 8556 9196 3058 36148 17706 13240 9573 21823 12601 7829 13558 22218 7743 2897 6203 17971 19701 5351 37839 8319 9291
382 2182 8340 23475 11636 28007 30243 13038 26063 10507 29351 16623 36297 24458 12692
383 7785 1325 1318 1482 1124 7038 659 1114 1053 1420 3137 1472 1441 6187 4404 1244 10642 5140 1249 1250
384 852 7722 6151 7713 3591 3608 6726 4927 10374 2903
385 6653 9986 8752 3788 9266
386 1145 4877 8194 7204 5811
387 1018 722 2902 7895 7828 665
388 1614 5581 4178 1428 5534 4470 7342 2096 1107 10669 2044 4137 10 1109 4375 9097 3268 2162 4209 659 1229 1422
389 6207 1110 1439 5813 1380 1440 7188 4209 4465 4352 2617 9207 6214 4219
390 9366 14346 4905 5276 13021 29646 25145 35082 5176 4510 5378 5680 10482 5670 4502 14444 15420 3310 25943 15452 4498 3304 20587 21844 8344 29040 10498 5235 12675 31787 5051 24462 16226 34386 2865 19236 35584 36707 37124 11286
391 749 15765 2660 11210 7857 3200 19245 12234 15768 15779 12220 9406
392 1657 1130 1967 1111 3270 1114 1441 3750
393 708 1534 3614 26501 683 3626 852
394 1221 660 1110 1624 3273 5469 2682 7156 9702 2232 11099 6922 8152 5096 7465 13449
395 26723 23150 33152 7489 10624 33751 14238 15129 6620 9850 17289 2914 33997 17402
396 4893 1198 4548 9629 4364 4477 1064 6232 6222 4322 1438 5515 6308 1156 1426 1456 6 1317 1149 2011
397 1035 5465 8385 11959 2683
398 10117 13634 21057 754 19074 32151 9032 6284 3436
399 2414 36528 17249 8943 37098
400 5012 2781 22278 11302 3622 15520 15022 1694 2772 10395 4943
401 2617 25129 1166 4646 10623 10861 3839 11824
402 3427 868 11898 4862 2017 786 3131 825 92 7423
403 7833 4331 3259 13769 2799 762 12859
404 22744 783 8649 2813 3259 1896 1992 20716 2677 10091 2683
405 8439 1352 18145 1732 1746 26245
406 26898 19246 6598 32814 15788
407 8908 19539 799 8917 7402 1814 14798 8773 2440 9745 4665 2110 2447 6492 24352 30102 14614 2083 8824 29733 5580 8809 18776 7910 30105 2242 14420 32485 22422 35252 34874 15077 10130 5585 4283 37915 21261 6456
408 6510 11955 24274 6494 14456 2082
409 2737 6652 860 12779 19668 4141 5323 3355
410 13409 7558 14225 7822 3359 12694
411 5770 9459 2666 19899 14823 3230 14469
412 25920 2025 8753 12584 13 11953 5927
413 8697 6951 10481 6660 783 9553 692 811 27979 10476 5868 1551 3245
414 852 93 5018 8267 1046
415 10394 4301 7652 13049 796
416 768 785 15 2796 2706 75 2737 7130
417 821 3072 6819 12623 710 1025 9241 2897 10216
418 9598 19977 496 34098 15040 443 4599
419 15890 28617 1471 10931 7759 773 30058
420 16085 16236 7934 786 3069
421 9614 6265 5118 15110 26680 22884
422 8262 2041 12370 2225 2008 2071 2226 2099
423 11652 4280 12783 12329 5396 13025 17638 14440 3584 9277 8436 14394 2772 13039 5845 20748 29055 22271 23920 10470 5324 16384 17633 14369 783 3490 14215 17641 22281 2959 17914 15460 8278 16623 30926 17743 10507 9177 6901 6805 2891 13036 9165 22288 35024 6768 30624 35755 26014 14919
424 92 4312 9545 688
425 4430 7485 2320 1189 12334
426 244 17572 17985 174 24025 19107 268 21737 289 14898 15047 28861
427 826 3490 4705 2902
428 4301 2743 762 7385
429 2259 5101 7558 4267 1646 12370 4983 3410 3397 946
430 4337 2210 3257 14566 10306
431 20732 15774 9042 6284 7855 10205 33116
432 2801 786 669 4332 3483 87 2807 2804 16160 2784 2023 3429 23449 657 6624 7357 9029 790 2805 3536 8687
433 7 4450 12212 9447 1982 1810 1560 6241 3294 1812 1250 3450 9431 6662 9435 2079 2580 36915
434 16882 16505 19544 16236 21523
435 124 42 4883 4837 120 14704 4834
436 5480 20564 7161 1139 13736 7112 2074 13053 7570 10133 7942 15321 1450 24320 2171 2506 2295 9525 5466 33986 4257 36440 2084 8491 1201 19206 2706 8488 28239 10 18360 2260 9027 24628 7291 22889 2543 26253 6398 2487 24648 17537 20667 2351 2459 2411 31268 3057 1846 20499 30104 17305 13861 2123 31164 18135 18049
437 4220 6922 22604 5239 9770 6181
438 23460 32889 8818 35243 17227 11520 8385 20371 28754 11863 9317 32030 17284 14886 32801 6456 7 2535 12933 11962 11965 10137 13253 20316 31666 5484 19224 24374 1035 5539 8830 7489 10322 21632 17223 26555 23293 26229 23891 9199 24340 7924 2584 8827 2915 25267 26792 2218 1474 15265 35522 7635 7500 31269 10130 2916 17681 2574 6551 13288 11660 24349 24647 15796 7509 8858 19796 15126 11501 4648 8842 2433 9320 7084 2560 8839 5633 12407 2097 12144 6984 24972 30101 2518 21684 13838 1317 15266 20302 6188 2109 21867 14775 4664 25321 36588 7491 31744 33420 8034 7627 8816 4124 17341 15235 1262 7633 13402 30875 28412 12708 28726 6433 4398 15503 10593 31844 35380 13873 7508 8860 19219 6474 22426 28328 8069 24359 7092 37461 13693 6421 5486 37426 37844 15651 12346 24336 12383 33072 35527 31115 25349 8811 34563 23279 10595 15275 38039 33583 37621 23565 31688 37536 36615 4205 37256 10248 8764
439 12825 783 3245 16364 2815
440 11612 11489 9317 31648 13377
441 781 5108 1384 1253 1045
442 562 4706 586 838 596 3090
443 1139 7539 3047 14992 19141 3221 13337
444 4120 35639 20716 782 9208 31201 27952 17519 24755 25320 7082 16923 1526 2232 9346 13755 12267 11489 31282
445 12231 32667 10000 15833 7838 6303 22184 12295
446 7270 3406 5264 940 4983
447 27955 20451 2580 13711 30477 11832
448 12810 24295 36351 11402 10447 8232 31701 3651 35382
449 2570 7403 28036 15839 1887 36909 14782 25021 14789 31914 17660
450 359 300 354 5369 5366 118 32984 17018
451 5309 35280 12257 20625 22078 29598 22082 5313 4729 12097 1675 5292 23998 985 607 35703 988 27829 36456 29061 27876
452 26046 5992 9591 4841 47
453 2902 2791 1025 2938 2782 2784
454 14445 5351 3482 11894 9156 12679 13035 17622 15702 17649 14964
455 14402 715 20169 16358 6659 3651 29814 34107 648 10752 5340 15454
456 31204 19309 6284 15788 25542 29487 12255 11128
457 1189 5462 20538 6531 37315 2560
458 10280 3090 17982 991 18847 19029 563 5161 7525 10291 836 5162 8004 1271 10277 10292 601 1268 10043 7529 567 28079 15612 8463 12198 4850 12169
459 6613 11919 7201 4651
460 19039 12175 1269 619 19038 19036 7998 25360 6638 5162 28791 38038
461 21986 6653 22109 7853 300 32715
462 10111 5063 3574 2012 10834 8303 3290
463 9791 3296 10933 9797 13065
464 4711 3512 2842 827 1549 8 2902
465 29588 6180 32364 2686 1038
466 1214 5199 23126 4536 1073 4355
467 3563 8586 7316 4247
468 7707 4314 4499 12986 2735 3258 9500 7357 4284 87 1718 14366 12859
469 811 26714 2632 2523 2963 14622
470 3799 3628 773 5356 693 11302 22105 10862 3245 766 721 11067 7435
471 15589 1068 8773 19162 4804 4179 13219
472 17284 2417 11960 10005 10634 7482 12346 4399
473 1332 4205 4327 1244 2701 4364 8963 5018 6465
474 8415 14356 979 13649 13487 3514 25352 15112 1018 10569 19161 8592 36184 3782
475 704 765 731 2818 5155 12313
476 1257 7501 15796 1240 1062 20072 5468 15315 14590 15686 2066 15669 37624 32636 7115 15503 15717 9827 659 25666 36867 3425 7759 1061 17187 30834 12151 1077 22423
477 12250 22184 29071 8106 9991 6595 5894
478 7881 773 19709 14351 3245 4589 25170
479 640 29193 1351 3096 12733
480 3302 19246 5898 32806 36608 6352 21173 21063 23463 6346 37589
481 2706 810 13441 1709 8626 26814
482 29205 8690 6795 24935 15560 5912 21814 6931 17602 19709
483 10803 783 2754 27299
484 3793 20332 4993 3784 6036 21206 19018 3792 15563 5278 5063 4303 10385 7892 3306 3493 8688 4928 2868 2902 8406 5320 2015 3774 5020 3595 7323 3596 2898 7307 3803 24459 13666 22775
485 1196 9846 7015 1149 2678 7513 2199 19816 6663
486 27935 8343 9193 23235 6795 12985 29864 24462
487 1102 1175 21649 4407 1138 1203 1487 1971 9769 5639 8714 1036 35508 7488 2393 2037 8845 4124 8816 7179 1038 9819 6663 9735 2199 8385 21866 17245 7491 13866
488 4631 1051 5817 1379 1410 19816 5826 1426 3739 4072 1378 5744
489 10797 2753 2729 2813 3484
490 2908 3332 10707 10890 10268 2014 3486 2019
491 824 16 5489 764 6119
492 87 6197 648 2792 5341 16
493 771 2643 795 1015 652
494 6827 5350 2781 3568 3493
495 30690 1774 16649 6108 5195 4364 4179
496 11 649 2819 1025 1717 7130 11652
497 2331 2048 11568 1960 29042
498 845 852 5188 676 1947 89
499 27828 586 32426 35893 8010 6638 35010 22085 20430 17875 20427 29514 12176 35771 36509 37937 28154 28817 9964 33741 8005 34210 17129 17131 22651
500 2071 7474 11838 889 3832 6193 2076 12834 1832 5142
501 12415 22381 16928 32736 19810 466 3039
502 16358 13035 28379 12679 15481
503 84 721 94 92 2866
504 8381 7502 7490 8846 31846
505 1174 30661 11327 904 1971
506 3495 973 2902 11268 2835
507 4144 7937 2160 10691 3371 2699 1036 1230 787 8963 3140 10004 4443 8959 8816 1646 1201 1447 7024 9759 11572 2410 28033 2064 10005 9675
508 9574 30832 14423 5173 17722 37170
509 35436 31622 11756 32528 8040
510 14168 771 3593 3426 2014 783
511 1826 7260 1718 4331 2721
512 2706 783 1852 10952 3259 1941 762
513 1084 14239 15584 6529 11489 5610 1321 5518 4644 9006 6443 1504 2160 6494 2218 3379
514 14433 8435 29149 3650 22144 10218 18784 31790 31190 19632 31911 7444 12642 24452 12163 30159 22280 23291 6151 27890 14454 19605 22984 22145 9174 17072 23686 7245 18106 14425 27974 22412 35065 14377 24937 19647 9557 8148 20435 3550 11892 2791 7879 35354 24986 9217 30210 20416 36733 3547 34672 10074 15058 10605 25478 3508 24634 25596 15052 30758 79 26811 37206 15056 29051 3777 28967 8601 31751 15436 32633 36641 12783 21215 5701 28910 32139 35819 35596 7239 743 22762 12766 11245 38029 31755 2022 37368 29053 3807 35842 9279 8599 9553 29955
515 11298 7687 8091 23511 25466 18228 13991 18297 24925 22623 22338 33187 14003 32308 35431 18686 1301 22913 1291 36252 22933
516 543 29135 32518 518
517 7800 5468 2609 1429 7478 1460 4548 1455 909 1176 1149
518 9284 14374 15414 1860 11111 5380 5378 4499 5796 14364 13769 13441
519 19924 5884 17434 28295 9407
520 770 4007 30469 30841 19775 29289
521 4513 1130 8267 799 5211 1104 1073 3379 1797 10134 7187 2172 1928 8790 8763 900 11505 8815 10900 1256 9796 4963 8665 1457 9674 8824 2915 2093 93 36908 7938 9284
522 6067 598 738 994 4687
523 25592 7964 6740 19722 2731 33662 7828 13017 13588 8311 2852
524 30331 3607 9191 8037 2720 6945 3427 3085 10817 14176 3591 6274 11065 7890 7879 5673 5047 11399 3802 8981 28756 7717 3790 15892
525 2097 3379 9832 6431 25452 11965 6456 14597 32486 3741
526 11508 1638 10721 10931 6487 1250 18316 10133 5362 3702 16585 1646 13288 7786 2602 5475 13866 9764 8813 34972 8069 26152 10094 15752 9786 1385 8369 2283 24016 22600 22593 13483 9320 15126 11091 2534 7626 34028 905 18777 5486 11552 8201 20302 1474 13312 6415 11963
527 4476 11018 1321 4527 7176 13057 1230 6554 799 1458 6575 1322 1244 7992 1478 1469
528 7338 999 824 3534 6109
529 1138 1243 12279 9788 17088 15651 24677 30378 25667 7167
530 6096 1455 4141 1247 4144 803 11018 1321 1230 1468 1253
531 8737 1566 1145 1380 1317 1330 1136 3703 3372 1471 1102 4630 1459 11080 1247 2357 1114 4461 1244
532 29156 26935 6621 23764 7502 30810 28617 22381 12645 6087 9838 15311 38012 7108 32269
533 11333 5753 9629 23813 1810 10588
534 8267 5091 1373 1785 3725 7111 5836 1393 1378 4879 4466 1253 1257 6443 1487 1244 10627 1256 1590 2068 1513 3750 2624
535 3849 17889 3953 26821 25083 33754 17255 20546 21740 6319 8693 32126 22890 13037
536 1787 1775 7734 5439 1786
537 3968 8871 3600 9989 9988 18174 2739 12825 8690 4509 19159
538 23913 3726 2680 22962 1837 1057 3372 1927
539 5191 1250 1044 6242 1320 1621 5 1822
540 34193 26360 17036 1474 15647
541 6653 868 5154 6649 2182 7337 20441 6722 20149
542 2758 7435 2718 3045 10269 608
543 6022 5210 1716 824 92
544 6587 659 6447 1329 15572 20269 6969 4648 5487 1909 7768 1257
545 6653 772 5395 4502 12017
546 650 2791 769 2909 762 10260 715 9783 2674 4315 10708 9623 2757
547 15572 7935 300 23437 20387 9058 2549 15414
548 1826 11496 4435 8719 2166 4182 6 10250 8152 1077 6433 6576 1621 9026 5227 15749 2106 9796 13141 7116 13142 1119 1624 2523 4106 10134 2024 4418 2410 18319 13830 1913 25809 15111 20480 13389 20412 1614 13828 13121 1982 3371 15020 2559 7394 1031 17184 28045 1315 19222 17240 5514 1038 2028 14892 2394 2213 2541 12074 2552 35083 25138 37096
549 3691 19963 4938 6061 1004 8640 29444 785 9104 3623 3600 6059 3645 2868 3638 21211 6670 8290 4089 14649 28598 3083 3054 2793 17 2865 2783 6138 4800 5271 3792 12601 28355 4979 3777 5173 11941 23483 13584 13 4549 1532 12 2724 694 706 16 14477 29539 2906 2786 9232 31698 2784 3775 4301 12765 2718 15084 9553 8414 6675 6778 9255 10395 13555 4949 5172 5320 12159 2170 795 7434 11732 8616 11693 6954 9248 9109 6131 20433 8625 11071 7818 2093 2706 8406 787 8341 6826 794 12606 4999 4502 19709 9567
550 1385 1119 1051 1459
551 2029 9626 4126 1992 1111 1847 9806 2611 781 2699 1330 14812 3236 28754 33051
552 2952 24593 14271 4710 2782 774
553 825 737 2017 813 2748
554 22805 17047 17308 498 28620
555 20536 1496 14691 12076 31213 31265
556 703 12978 769 649 3667 783 904 2864 2763 2845 7425 21220
557 14843 5041 3615 2020 11380 11378 6861 10812 11815 5319 5842 18086
558 14575 20791 4183 9450 5265 11692 13893 1646 1904 5084 6238 15196 892 1944 4208 1598 6071 1642 22587 4868 16371 1385 2166 11502 1476 26649 13301
559 2034 2509 2372 1944 5845
560 6148 3544 852 2826 2774 763 2753 13587
561 2877 21100 21028 36470 14609
562 93 10114 15 765 786
563 27879 3591 13587 29211 9177
564 688 93 2744 772 774 2782 2777 769 2706
565 8665 3782 3647 772 37060 13439 1053 17341 6490
566 1141 2705 1810 1104 28700 8827 2040 11503 3 37992
567 25360 10039 29521 1275 19038 10280 36509 27992 32530 22656
568 6778 32470 30355 9281 2714 37418 9889
569 2902 6057 2801 6122 6951 715 1711 3777 12017 3807 22744
570 657 7939 8036 4503 14348
571 4556 11839 9629 3752 1043 7302 12997 4076 1196 4147 2330 1225 7254 21635 3343 10969 7552 6640
572 2892 736 2820 4161 8287 15
573 7804 1114 10351 2678 9747 1152 1320 9735 8261 1240 1619 7121 1239 9757 1623 1415 4473 6094 1459 821 2851 1015 1532 5905 4144 10365 1530 2014 785 15 6295 4996 2737 774 1003 4500 6653 87 2781 4590 2638 4493 7833
574 12783 29534 25996 22566 30529 16320 14527 7130 16194
575 9796 1496 782 9007 9687 1221 9838 7114 31028 8369 15592 7177 1035 1069 1979
576 5266 893 2775 783 11295 2953
577 8645 11236 12330 2927 26014
578 5788 8472 26269 2484 3373 5768 7177 3456 10779 8473 1432 20680 8561 14804 1800 13406 5757 13337 15788
579 4219 12378 1460 7568 1199 1253 1109 18664 21266 24353 7635
580 7880 3245 1531 2902 773 785 1053 1422
581 2416 5118 32631 25020 1894
582 6133 1445 4496 75
583 4328 1162 1134 1460 1073 1249 4473 1244 4488 1477 11607 9758 4160 10591 7203 8959 3740
584 7120 2938 4796 3245 3284 2022 10812 33541 8329
585 12940 5037 2866 2019 3083 6268 7830
586 4454 1455 7773 1398 3456 6211
587 4256 1647 1377 4981 4590 6199 8232
588 6137 8281 81 3247 4955
589 4608 3542 6324 883
590 7303 12927 25386 8845 8732 897 3710 2593 7774 24135 9796
591 7573 2902 776 1017 3245 7239 773
592 3379 4653 1257 20477 4172 19200 10591 17519 20224 2701 4564 1248 10093 1492 1506 13776 7176 4443 17399 5094 2064 1447 7493 1439 1245 6433 6208 11326 7158 1057 1104 26724 15099 32994 1084 10659 1696 8740 9768 2275 1526 3294 1525 10247 7277 10931 5531 9632 1134 2385 2482
593 87 8587 69 3483 82
594 7428 6876 16226 19709 31193
595 7134 33420 7071 30366 26173 14800
596 3626 2957 1017 24587 9891 10608 26760
597 2803 3259 5319 35063
598 10797 743 2718 9545 11002 2881 0 5669 2946 3496 5704 1542 3541 8018 2774 30234 787 2724 2817 17620 7876
599 2801 12017 13028 35842 34700
600 19013 10417 1708 7239 14927 8326 7545 796 3323 5054 9364 767 12066 10447 6063 8649 14372 8644 9558 8415 3801 8332 2905 10457 14211 8603 14200 8667 5394 7873 23501 2175 6256 10568 8680 5024 8012 4905 25595 10442 6048 13263 10396 6050 5235 11892 2780 8679 8646 4503 8640 11391 8683 13447 5022 5175 33562 32633
601 1441 1953 2038 1429 2512 1448 1451 13 1856 2179 3260 1478 8266 14632
602 34731 22047 4634 28328 6452 13226 1077
603 13733 6443 6481 11094 15272
604 1439 1056 1046 1425 1646 9835 4 7203
605 11430 88 6819 11002 1005 826
606 1442 6443 11016 4207 8540
607 4032 1624 31453 656
608 32925 3918 3179 22698 16348 31297 33916 18121 25277 10736 2814 772 5395 9892 13441 2739 4991 8 19619 8693 5072
609 774 1541 10890 786 24460
610 20975 15836 29189 20732 12289 32000 6328 747 9033 7855 6360 13363 20394 8161 8569 21039 14609 13335 13638 21095 15760 19073 20242 12236 4685 9992 3210 10263 21036 32002 28565 9994 12243 12558 13328 10001 4070 3298 6589 5877
611 12984 7147 704 32232 21341 8693 17188
612 4500 9389 4589 10489 8592 3488 19291 8392 704 1463 1803 7695 8201 10439 910 11997 6942 31430 7254 1810 2316 11592
613 8355 1489 15823 1855 10951 11100 1134 1893 5477 2109 2523 37733
614 10052 3767 10113 4271 3772
615 10415 12938 3783 4233 15851 26853
616 1440 4465 6180 6696 27957
617 1069 20043 31967 5748 2800
618 6239 1240 3747 901 2173 12132 1038 2128 5212 1189 5518 12125 13712 4030 1175 6702 22417 17290 2295 8376 9741 3379 2604 8385
619 767 7762 18123 12906 8626 11025 19020 19577 7226 34917 5061 29403
620 6053 2724 14406 762 2794
621 5363 4524 9656 1460 1438 5567 2559 6243 7080 1578 1317 4422 3542 10636 659 1202 778 1566 1567 4209 1622 5218 1473 4359 5209 1402 5817 22670 4540 1068 6187 1663 1052 1114
622 14515 15974 776 2718 2757 1015 16384 2807
623 26860 1723 8506 1306 15870 10521 1753 14048
624 1682 8038 11651 76 14413
625 10508 2845 12943 13272 4091 7428 5235 10446 8430 14868 19865
626 1514 3275 2292 2273 2199 31631 4197 1109 10647 2274 4149 1798 11080 3265 14985 1848 2593
627 852 12851 32421 12007 4915
628 2941 15 794 2706 81
629 4126 1429 6245 1459 13297 1438 7822
630 665 5148 3513 9502 75 2828 3490
631 690 4959 5725 4939 7818
632 3307 13541 2835 25471 19707
633 6818 3600 654 765 5188 2964 722 6659 4293 14402 721 21144 8752
634 4769 19531 2877 5247 2744 1541 1826
635 8111 2650 2658 9775 1002
636 6038 3312 10138 24300 2615
637 1380 15298 4116 1441 1245 1462 7195 11712 18705 4454 11715
638 1944 13824 2283 5778 2118 1793 10969
639 7123 2050 2335 1256 1259 4015
640 24002 3302 28565 6362
641 1949 2587 2219 2509 22871 3489
642 69 1541 2726 1271 17044 649 423
643 3062 35754 8529 20603 4233
644 8933 1144 26929 23514 3343 1487 20658 1463 4555 1373 37278 2025 1412 1893 2519
645 991 3399 7213 9071 8120 4047 8127 4063 7270 952 4986 20782 37902 8129
646 7280 3083 14959 8341 25170 2866
647 3756 8326 27896 18102 17623 15421 14204 8329 5023 6762 11694 13266 8419 3817 8321 10603 8406 14192 17614 2844 10417 785 8279 7643 5380 25147 4931 15425 2180 8434 5024 14206 2779 6017 2782 2778 8692 5319 17861 12827 10755 4304
648 32463 14449 37822 633 1338
649 2764 1548 87 7422 6430 4667
650 3695 3574 2724 762 7938
651 9145 5859 7722 8934 5232 25796 11053 3284 32037 9547 5382 3689 30482 13272 18763
652 14989 2708 6628 1003 1710 18644
653 1165 4450 12878 35857 11497
654 6687 13 2063 11330 20498
655 1067 7766 18003 7353 1271
656 25848 27149 30356 25065 23957 20930 37412 27498 37451 16808 24087 28396
657 4387 1397 6501 37232 26057 30405 13857 3735 7111 6490 6531 15659 22386 15813 6566 10856 15098 26663 33771 4371 30724 10141 18135 6515 33706 10854 9469 32731 25461 6533 2517 1087 31266 16443 1084 24370 22433 12717 35193 6666 2381 1524 25129 32306 8964 4650 6551 19143 19127 12708 24684 4517 37514 9321 32028 35527 660 4365 17341 22584 13319 34117 32021 4198 27000 34731 35894 30527 32030 2558
658 7001 12867 2742 5534 24329 4395
659 6144 14294 13386 3273 9789 5533 12701 5 7759 7107 1614 3221 7061 1256 2422 7699 3379 23122 7036 14893 1908 14721 1253 4323 7570 10096 7354 2523 5467 8275 1600 11753 8956 1828 7040 9792 1632 4358 23454 4339 11532 4658 12714 2392 2124 774 22664 2020 9324 8267 2011 4422 13064 2329 1257 5567 5537 9664 19096 3460 1506 6998 5464 2085 2262 1233 11480 10134 7465 10 2700 1166 8203 12057 8359 1388 24320 676 4667 3790 29344 13056 11310 1513 2701 19741 7116 9666 10620 23455 23595 14978 7482 15241 1189 8369 9753 2199 15251 2087 2479 1179 2397 17519 12049 8562 1249 15321 1221 1073 18536 13141 10899 1032 7000 7942 7108 7024 8921 1720 4357 1045 2282 2126 10060 1181 11511 28179 20320
660 2663 18536 2506 8848 20823 13747 22531 1203 22423 4034 1515 17215 11510
661 14369 30465 15454 35354
662 1003 1004 2818 2819 1006 2736 3045
663 1794 1757 3096 765 10985 12654
664 4270 5226 5228 799 18003 773 14642 9987 2942 2793
665 1243 17230 5465 7126 1045 8836 5577 7515 1633 22386 8796
666 769 1717 13190 2014 7130
667 4727 981 9501 3596 11120 826 15 11 11050 4546 9335 37248 675 674
668 10 22742 1840 25185 1825 2192 10900 3344
669 16390 12046 11644 1989 1610 4193
670 7261 11649 11059 13600 2012 3129 1826 3317
671 8074 5566 4361 2141 17217 4724
672 7790 13307 30834 1524
673 4135 4139 929 4 1953 8558 3703 5833 5577
674 1253 1095 18117 1469 1475 1478 13294 1487 1493
675 11978 17453 11520 8773 4658 14304 8842 8839 1242 25224 4643 25348 8860 11599 24685 7150 7487 1329 10685 23770 8857 33197 24089 36867 14808 9867 24664 25031 4483 25134 20077 37799 13481 33105 6476 17421 4097 7062
676 1105 1640 10067 814
677 2820 2754 11120 12 7604 1053 6551 10252 12930 5023 18790 5145 2944 2902 8436 4205 912 2433 8455
678 1025 5357 8037 1446
679 1556 7784 4032 4560 1241 1449
680 28334 9586 6840 25944 6659 13025 22267 17744 1937 4999
681 12812 9044 8569 4065 5884 11722 2658 5899 15764
682 6883 1682 2928 4995 811
683 8296 842 3603 5037 2782 4935 4928 2774 1941 24872 35714
684 781 10 1026 1098 1596 2685
685 6551 1837 2386 32981 5473 2026 1077 2527 29868 5 20704 32269
686 2093 7177 11520 1529 2798
687 10576 6600 11161 11696 11699
688 20509 9507 2767 5379 3313 4963 3309 6655 19662 5173 8589 9154 3245 18696 4530 1810 10749 11288 8750 3256 8341 7811
689 2701 6 1624 1330 20069 2683 9898 1898 927 1244 4464 17656 4352 8224 1506 1509 11478 1496 1104
690 13221 3278 4267 1405 1095 1971 1331 8262 2212
691 17688 7758 1792 6242 2548 1208 6990 15826 3741 1598 7699 1257 5485 10088 17223 3379 8845 13941 18302 13130 1111 7013 15741 15151 7853 15886 8813 15115 11959 1481 2064 8369 12930 11581 15796
692 1746 22348 14089 37763 30793 13146 14844 32476 22354 15876 28419 14449 36251 22342 31764 14068 32380
693 2803 733 1826 2706 2791 5320
694 7828 7949 8284 3313 657 1004 2872 6036 15029 2902 10494 5351
695 19234 3556 10966 6954 8280 3807 8633 3520 9138 6257 28931 3777 9254 2707 9111 7722 6043 762 2845 27942
696 1455 1062 5087 7286 2050 13713 1923 1031 11573 2093 1255 2191 7561 1805 2034 902 2052 6218 4361 1988 4517
697 1321 1481 2109 1698 1637
698 2784 21252 69 774
699 3381 16436 15098 18501 4032 17298 14689 2089 4122 2292 2045 13452 7399
700 1473 803 1244 2705 9838 24688 34958
701 3368 11490 26509 13779 26098 9905 26575 11441 2305 17542 22529 18427 12033 9431 2481 21506 10637 12999 2059 10640 21634 15752 12151 25042 23453 16437 17165 4137 14612 35966 14760 26200
702 7826 1522 8376 1403 1477 7773 4387 32983 2686 1174 7631 4075 928 1249 2109 11551 15270 11529 1795 35244 11961 13734 17405
703 11760 22451 1786 14062 15857 11800 3126 10481
704 10470 2170 15453 28908 17919
705 17912 1718 76 24875 9284
706 8556 2718 2010 4348 6207 1030 1971
707 3778 2768 2179 790 0 7545 6653 10208 652
708 15715 1683 3638 851 1543 6716 3287
709 8272 2026 8959 5749 19320
710 2718 3430 999 714 7596 3426
711 2255 1056 904 1075 2701 9789 11505 2385 2199
712 1324 8950 4452 8256 22883 13712 34641 28754 13485 7306 15644 4483 8200 20309 780 22884 2565 1441 11596 9841 33105 37618 17726 35185
713 1941 17445 3512 3280 3591 3291 1537 2842 743 6651 4862 842 3525 2897 2737 3284 2014 6653 772 8064 4895
714 19291 2763 17 678 652 3045 4500 2797 2782 2791 774 2936 6254 4497 15 9543 2012 2023 9989 12811
715 762 2775 4313 276 774 0 2789 4511 2798 2735
716 962 13983 10724 10702 10162 5406 12954 14071 12747 11757
717 7631 32023 5205 34563 922 7901 20235 1569 8817 4873 30376 1318 13460 2916 2064 18776 1070 35671 12717 23565 5480 2172 1661 1243 5482 11916 1904 23944 5563 1594
718 731 25483 15559 6130 703
719 16414 1826 2720 3167 2878 9221 811
720 902 5772 5778 8471 30953 2275 3294 25109 8034 2320 2597 13872 15837 2099 7276 1129 3709 33989
721 4971 14424 18110 9581 14566 34443 19845 25607
722 1255 1143 4476 1334 649 4375 77 1853 670 812 4330 7877 685 1444
723 22017 353 466 35956 495 21453 37040 22900 35957 36482
724 1084 7450 1056 1080 4403 3379 6188 1244 3722 2393 9771
725 3426 2787 1546 783 2012 2014 762
726 31977 8908 7562 30165 11713 12306 34321 22071 1803 20219 24938 14750 22530 1196 7449 35582 26209 3216 2110 26932 13835 1880 23582 19556 2444 2215 7299 26095 23182 34010 2329 4523 7966
727 25899 4999 24599 15514 14353 18767 14662
728 17659 7401 4665 20552 37016 13094 12358
729 9690 10643 4364 1878 12377 2416
730 1250 6237 1101 6689 1164
731 34941 9939 23985 22654 12204 29058 7538 8060 12180 12194 28819 36416 8005 29057 17133
732 3268 1604 1833 6237 6214 4117 4120 4204 11524 3260 1053 1133 1837 4177 19213
733 2199 781 5462 1496 16585
734 13028 28381 25035 29646 27795 11896 8690 3086 3510 2964 5381
735 5465 7167 7903 13137 2219 9006 4621 1387 7988 1040 1818 10321 8795 10395 7432 7126 7296 4106 912 9838 1366 5439 1145 12927 1616 3831 1541 1529
736 715 4991 2643 3647 15156 11554 4500 2711 8636 6843 9241 3636 10379 7833
737 11659 13167 8886 1452 3455 1939 780 4374 14791
738 26206 2484 9881 22694 33587 2419 29721 7302 2189 32985 29613 29885
739 15262 1504 12716 10130 7460 35420 7506 6841 12210 659 13754 14597 2392 25187
740 11892 5492 3807 8645 10651 12984 10826 14384 14215 14679 10241 9586 13276 30617 7162 30401 9261 9285 5021 16625 29985 10443 13027 15456 21623 10505 26012
741 37427 614 8044 26688 27990 19033 19039 3089
742 2920 601 17093 23999 22083 23983 27819 30825 22651 8009 12177 4848 32429 29518 31519 29514 20428 4676
743 3387 948 4060 11370 938 5262 8507 3404
744 4178 4072 1240 4114 6605 13470 1465 2042 1398 7822 10247 1826 4513 7450 905 1472 12343 1130
745 8167 13622 20547 24746 13617 22184 10000 10153 13621 10156 6347 23714 6314 15786 28917 36608
746 3352 68 656 7425
747 21037 23527 26889 29375 6336 5893 24097 17998 9300 12224 21178 32402 11210 24439 23887 32660
748 25266 7533 771 1718
749 15240 4 1715 9904 1800 6692 8796 1555 7126
750 8704 7393 4972 3757 33395
751 26216 904 6215 10359 1244 4179 1845 8372 7490 11919 12328
752 5830 6102 7697 1146 4318 4375
753 11100 4443 1509 8816 7119 1455 9704 1855 1811 7159 5197 24317
754 8067 9483 13959 10044 7532
755 33138 5027 5884 22527 12556 11164 36396 12074 7627 36259
756 721 9486 8657 2787 649
757 12330 15454 2798 32932 15475
758 1607 1254 9026 37549
759 11371 931 945 10282 16029 3931 3390 28122 3392 3387 20782 944 8120 25296 8121 4987
760 1322 1377 1637 4126 904 3050 1134 4361 844 3247 1482
761 8216 1659 1109 4228 6225 17515 10648 1909 7548 1851 13063 15797 1879 13627 902 22261 2607 5786 12761 3511 1832 1317 1913 18586 9745 4220 13118
762 2866 3488 7210 24895 2706 29823 18763
763 29974 1001 11690 649 8433 21154
764 676 2902 2706 32143 770 762 2796 2835 2638 15 25360 1678
765 4812 276 9509 21722 398 12448 17029
766 12885 9104 10395 7425 9144 2774 3651 7545 9138 21825 6053 7435
767 5063 12878 2482 2712 5323 3817 1053 10496 15671 2916 26015 6053 20195 34935 8376
768 8381 28060 1262 4410 1502 4346 6222 20475 12576 30280 15644 11885 13294 26605 31160 10649 6116 19125 16580 29725 6523 6211 30596 25914 13120 4211 8721 13302
769 6161 8905 6408 8950 32087 8252 21594 19553 25754 7125 4214 8247 6406 19123 10674 20359 6412 17393 2172 11739 10643 15844 4216 11885 15100 8733 6634 2609 2173 30398 2632 1490 8740 5141 32983 1189 9768 9870 13478 4410 2379 13302 1104 13805 20476 7792 6540 4172 19150 17286 4211 8208 19151 1324 28969 19152 15102 4637 22043 4352 14993 15297 4459 9449 26791 2044 9911 3379 7286 13807 2398 11509 904 21266 4669 2224 2131 2123 28682 786 973 22941 628 5412 13982 32376 7674 14261 3109
770 4187 7751 5451 2333 13253 11335 1640 11279 1126 20358 4202 1457 13057 2686 8921 4323 6535 1321 1420 13481 4229 9665 2915 15325 924 29590 21314 14888
771 466 30194 335 15038 31733 507 22792 21797 6009 543 27983 21777 15033 535 28861 26392 19922 518 13102 5938 537 17021 267 24029 3003 352 4723 22007 17987 26396 420 23576 22800 506 15044 231 28275 26355 31136 465 311 239 3010 17080 243 12021 37757 15046 3028 22562 34288 32525 17078 32521 37863 36956 37276 37955 303
772 1258 4435 4034 1109 4544 1330 15567 10355 4512 1320 2025 6688 5280 10913 9070 28779 6926 1089 981 11923 12633 4193 5752 7788 6180 11902 799
773 2541 23574 923 18048 26167 6569 2082 4608 11079 2523 20038 11505
774 2238 2376 4300 2265 12055
775 22491 9871 1256 13094 3287 22016 19734 6547 17250 17291 7126
776 1496 12343 10591 6587 1044 1111 300 7934 13 3048
777 3525 1935 7453 2179 4963
778 777 17137 8614 12608 17280 2855 13504 9154 18089 11732 8278 2960 29226 3305 691 796 8317 4109 8639 16618
779 28611 2365 2199 1090 17254 8189 15235
780 10579 12218 6298 6287 6301 6311 13633 20607 10116 5881 28193 6314 31775 6594 3435 12215 17265 35001 19070 6292 7840 24743 35147
781 7195 1057 1102 1104 2337 5468 3373 1244 1377 1509 1879 8879 9026 4541 1257 6241 9751 1640 9414 2192 7822 4256 20477 1250 1329 905 7302 1249 7273 19087 11625 13288 22258 15841 17284 2128
782 3129 657 2718 702 2020
783 4343 12403 2509 9819 10005 23461 1258 903 9822 13081 909 8946 6239 28994 1893 1121 23560 1404 6531 23139
784 843 2892 2179 2866 4585
785 1718 7261 7596 33672 1935 652 6765 2182 13034 9574
786 554 619 831 598 4856 596
787 17919 26182 2564 37722 2352 7037 36569 33601 37980
788 29445 11804 21358 36979 34503 24459 12160 14852 22411 35818 11893 31450 24061 4800 13001 9507 35567 6128 21201 11633 28964 9173 25412 10212 36541 24559 25860 26869 23686 36639 34681 4933
789 26655 22487 7792 11329 6581
790 783 1826 703 2964
791 1702 2159 8468 36334 36583
792 4719 17212 2996 19919 28365 9508 5955 12527 12874 242 449 32268 499 20877 9917 293 313
793 22770 19958 18791 26011 18674
794 2242 25967 6453 13210 3744 20441 2700 3287 9757 12508 1078 4623
795 25781 1534 30769 7356 10208
796 11226 10454 8403 33407 11025 8394 20745 32397 31469 6033 15468 12764
797 5220 35824 31043 37186 6215 12354 15623
798 9883 1057 5142 9209 31111 11596 10248 6172 11483 9777 7198 6215 7798 15738 19816 5610 10092 5542 28060 1448 10229 6531 25369 6080
799 10720 16425 1244 7487 1045 7001 6572 8772 27955 31758 15247 4365 2553
800 6972 7155 6207 7130 14167 3783 5488
801 34183 15214 8504 11929 17201 3118 15866 8447 37271 35233 14252 643 11926 29084 14120 3096 3101 5408
802 2547 4530 15735 1418 4327 1706
803 15 2897 2014 774 3427
804 19948 29480 35746 2351 25330 11713 14815 1182 1838 1911 4443 33993 1095 2318
805 5057 3618 15024 10808 10834 3667 33289 6846 821 8324 11070 10463 14425 36645
806 12904 7873 14365 9579 7120 20748 28780 33668 3687
807 8 899 6381 1559 1921 2124 6922
808 10094 10686 12645 13888
809 1540 3245 4495 1016 1445
810 23398 12820 1011 6143 5336 14296 3352
811 1444 3291 19643 3572 22434
812 25105 672 24347 4111 93
813 7904 7545 1286 10513 14074 11757 22890
814 3112 23785 14257 18305 3102 3121 28029 11781 11775 7685
815 1019 657 731 6159 2141 23190
816 693 4510 3300 12017 7966
817 3045 7573 22133 3647 14667 3659 4332 11245 14208 7719 9215
818 3259 2706 10450 796 8755 14521 3309
819 9998 7849 5884 12228 18033 6368 19251 6369 8167 23029
820 2141 1242 1114 1855 4339 4335 1317 8267 4648 4459 4257 9819 7631 28152
821 2806 1629 23271 860
822 12795 15214 33268 20317 4536 22240 4337
823 1116 1240 10562 15249 5098 1114 11101 21428 2915
824 93 33819 3497 29841 36335 2796 4502 11295 31883
825 2259 9415 2824 2813
826 6198 786 15083 6827 81
827 29131 32544 32286 17084 28640 2991 453 22820
828 3618 722 3290 2897 3291 5063
829 5362 8275 5540 2782 2462 20148 1056 15247 17670
830 8523 12238 7835 3445 5899
831 1271 1277 566 36676 6641 10039
832 693 5908 844 73 842 5905 10218 91 760 4920 8019 10796 8 771
833 10133 929 20810 2009 13094
834 860 2902 9892 3629 5339 9501 21154
835 1797 14378 2781 3778 7877 69 17282
836 1553 6176 8557 1651 3223 8565
837 10611 14188 6044 19718 11068 9552 12937 8533
838 8146 4586 787 743 7981 3245
839 12364 15172 5753 29593 33596
840 26047 17152 15043 21953 32332 36522
841 35587 4564 30917 1527 26178
842 14346 5381 2737 11410 3304 7438 9890 19235 5051 13280 8690 13018 6020 8686 15473 11286 10848 21623 5685 12017 5396 855 21625 8399 6661 4938 3699 24062 774 819
843 1263 12680 22391 6450 2969
844 2915 2183 928 6490 15106
845 3600 3419 8704 11735 1531 3045 2724 12327 4510 979 8693
846 35657 9550 9575 13016 29053 25897 22279
847 4257 1075 8385 2040 11840 1056 11960 32364 9781 2342 12715 21867 1084 1524 7996 15663 7509 15264 1249 6487 7630 1842 14418 1032 7190 13900 4328 15669 7635 4663 3747 33891 1692 15651 7627 11967 12149 9818 31688 9827 37843 19127 38012
848 2682 4132 1187 9431 1130 1109 1256 2422 1965 25809
849 9557 12609 31105 6256 2905 8695 655 22470 28001 3055 22148 15461 4301 22993
850 3932 17748 31411 8495 22933 14076 18681 32111 13187 973 751 35580 624 8096 15827 5411
851 1273 23993 614 615 27819 4729 5164 1271 22654 24001 20424 557 5315 10301 10044 29804 19055 32707 36719 5310 35412
852 15865 577 15615 576 1310
853 4331 5158 8604 721 2775
854 13774 37183 34512 35584 25860 37124 37962 21844
855 6982 1259 3379 2085 5783 9430 1970 8194 15147
856 1152 10653 4327 4077 12694 12138 2303 20680
857 857 724 3574 3768 9263 3590
858 2706 3483 1025 12 5020
859 9221 5012 3490 7915
860 721 786 3647 2823 2754
861 7038 7153 1195 1068 2685 15933 1902 1157 2717 774 69 8428
862 2800 7485 660 7341 4032 1102 9725 1979 3825 4530 898 1053 1637
863 4158 1145 29458 6451
864 5018 10890 82 762
865 21405 21410 668 23686 27835 770 15474 28966 5396 30520 6627 33006 26014 28968 10377 32633 13446 31755 34928 24462 12675 14167 24450 31149 2020 33560 2769 9277 7239 34935 26811 10465 8012 2809 17921
866 13913 9336 14408 5327 5278 37985 31710 24879 3530
867 1226 1418 1897 1971 4422 908 4076 1451 1594 7977 1876 1391 1455 4124 4443
868 3248 768 15697 12821 9134 2902 716
869 4443 12131 9668 1916 7071 1204 3225 3378 10133 10720 11101 8235 6433 13754 8774 7092 17300 11089 13482 5485 1457 10005 9747 6416 12337 6502 7114 4261 8217 20144 19223 5464 5518 6456 1895 24840 20148 711 1717 15812 10740 14974 1050 13747 2579 10649 7489 17670 25936 14668 7111 8267 8849 1828 7942 1035 31995 6190 20681 1221 9753 31447 7508 1110 25666 24646 2479 20412 30451 23455 12930 13755 17681
870 1956 2531 7750 1814 2563 23830 35797 20321 1855 6680 2397 1985 12592 2580 10133 26106 2447
871 21798 37048 36771 530 401 29577
872 7822 8536 1510 7112 8205
873 10005 5484 27792 5766 4387 7582 7115 7571 15135 8385 27010 31834 2333 14639 3139 16935 4466 1492 15303 781 1812 17681 912 25663 23537 23354 8849 14729 30294 6479 32016 7070 13482 1315 8813 1793 1063 8740 9761 14752 6188 31108
874 4770 23698 4994 4656 1543
875 2365 22041 8838 5239 1949 1084 7101 12759 4229 4873
876 12947 15855 19332 3111 1294
877 33920 5782 22069 11623 5477
878 14092 5437 12725 12736 12746 11928 9335 4500 11006 2891 783 3259 7884
879 710 1696 19301 12052 10619 803 28042 2079 12763 2902 1826 1941 2179 87 3625 4157 4546 1579 11877 2599 768 33106 14785 8476
880 3783 8301 4904 2895 22111 8636 743
881 3430 678 82 765 1539 1546 7164 0 786
882 17347 17464 21572 20312 19078
883 13130 2064 1318 1240 9735 10134 35787
884 3827 18362 20037 13766 6527 1992 24258 6414 5486 6393 4415 11519 2686
885 11917 14308 5607 7897 3295 4415 20728 4207 1373 17382 6407 890 904 7024 6192 11759 1970 15109 20795 6529 24259 2090 10351 29877 12492
886 19006 4494 29224 6813 26830 14322 6782 6802 30382 36262 20737 9180 6724
887 2701 5005 6384 10949 15645
888 4474 13714 1586 12394 4601
889 15050 30340 7444 33544 13026
890 765 760 3651 7435 9221
891 30624 14424 3608 17705 22950 23844 15437 1541 33935 14662 14442 15436 18967 15463 21358 36757 12602 3700 35584 33680 27799 35916 10373 37022
892 3536 4994 6651 4996 2784 4111 3189 15821
893 2236 1031 1406 8263 1470 4388
894 6246 8216 10743 4610 5225 783 3248
895 2686 12878 13715 15674 4114 15335 3703 9838 6575 6500 1412 1637 33986 24379 2054 8832 12328 3709 1513 13747 7159 12346 37461 11628 2584 4200 1129 20309 13776 24392 1397 6231 1472
896 22045 2023 2737 1682 1826 2902 12313 5677 4500 695 773 6159
897 17734 12236 33594 3837 34889 34552 26887 31182 37664 24440 35188 32858 23714 28110 34707 8568 28561 29380 20992 18910 18044
898 6108 1126 1145 3267 6189 1327 3821
899 628 1344 975 1786
900 8954 11520 17182 9796 4371 27012 2902 15 9006 19734 12881 22172 2350 2791 790 3490 4339
901 4498 6385 657 3248 3480
902 1977 2135 1646 6306 1412 1439 7197 33584
903 4984 3407 3387 7265 4039
904 8587 3539 12 3045 2012 772 1015
905 12744 1779 13965 629 14052 30823 10724 15875 15854 11794 22934 18408 32665
906 2125 21593 3379 1134 13485 11008 8858 20355
907 3722 12123 8368 1066 11612 11010 4425 1211 25385 4364 11956 904 22667 22424
908 1134 2494 4664 30783 6215
909 3560 8628 30623 2014 3678 3530 29671 1826 4294
910 1826 857 1904 6841 2185 7881 4860 10377
911 2897 1025 1860 2810 87
912 2374 1922 13928 14592 2419 5778 11977 11351 2276 13872 2541 2334 2257 12856 2506
913 1879 1250 1971 8816 2084 11822
914 2787 11120 15443 7453 3817 23476 9501 12679 24460 12017
915 4991 2897 5227 1156 3248
916 1310 834 4698 4848 10034 4858 1275 762
917 1465 8747 12581 1475 5254
918 1016 7875 8 762 15159
919 581 606 4698 17130 6640
920 18915 1011 4557 21389 7604
921 9501 10316 19726 3248 3045 9569 12946 852 12825
922 20477 1249 7825 9788 7273 6974 4115 7888 1845 10653 6570 1245 1513 3722 13289 5100 1150 28152 9678 2166 10319 7187 1264 11089
923 9501 10241 31839 13023 22435 23476 9988 19470 10507 24449 16361 3479 10491 5401 10441 10463 11729 15454 18174 33002 14326 10470 17916 13036 33049 32791
924 14406 9 3628 860 9567 4980 12017 7658 852 6659 9988
925 4399 15640 13288 9424 9806 1438 2523 13093 20542 4408 30943 2293 12878 15320 6701 11962 26137 21261 11496 22431 13906 11521 7502 2108 9834 3379 13905 4415 14668 11959 11087 2410 19896 1898 31544 7604 20235 1164 7416 14420 20407 8849 8375 2481 10259 9805 7071 29762 32486 1187 10130 22418 14996 20144 9670 8987 8376 6997 26224 1165 6241 23893 15275 1070 20321 11511 9665 24351 33053 3269 7635 11493 5826 24363 28726 2541 37061 12004 2559 8178 25665 12528 33196 26386 31915 3050 37932 15277 2528 8830 37845 2616 25138
926 2728 4149 1707 6951 2706 9389 7425 743 7357 8836 4865 8433 9904 7877 710
927 8072 5340 4578 4576 15754
928 11510 1486 35234 35398 15448 38011
929 2794 771 2763 648 2806
930 33 8431 315 4830
931 1165 1383 13 7211 4488 2701 2422
932 2904 3651 1627 771 3045
933 34668 12921 5721 30884 5390 9286 3635 10752 3284 15144 7453 21624 35350 27748 33490 12331 34290 29054 10423 13912
934 23775 3165 28576 27062 16858 16772 16469 16272 27415
935 35080 23482 27772 31762 32609 29496 14376 36207 17145 27842 25059 16620 32946 33460 22522 6876 12908 21139 34076 36621 29211 28983 9193 17635 34909 37167 27841 19577 17189 15405 20628 17123 5401 12905 8704 13668 3058 19641 34474 33246 34750 23299 30515 36156 19598 3691 22075 30937 19657 25342 13040 9088 10914 7307 3556 19235 24563 14404 9565
936 4862 1006 7651 1628 2851
937 13335 23033 15832 10000 22527 10155 32463 32814 20547 28424
938 8235 5468 7071 2679 1035 25452 9615 7508 13064
939 300 754 6374 30020 7835 12570 23027 8094 12228 7859 35807 4685 9998 8113 8106 19075
940 2709 1070 8149 13683 981 12314 15639
941 425 16384 12015 3612 11317 8692 26652 8281 3798 9564 15505 13583 11895 3325 12901 16237 15359 7723 9615 15112 19679 15433 19270 8435 7947 87 13046 27873 2763 8021 10431 29364 17861 28292 14166 7336 5798 15515 23571 657 83 10508 26604 13770 13446 24953 7345 22539 18200 27519 826 21411 33146 11881 19133 6439 32321 10950 776 18174 5387 9165 9501 4922 13774 36783 852 14394 7643 12903 5378 5398 7046 28693 4314 6384 82 4502 11388 12328 1121 1471 13315 17857 37338 14167 18611 2416 24559 22516 22016 1031 28175 37833 32720 24954 17328 14289 17440 21364 36733 19285 7604 1029 16226
942 1826 9913 9390 5363 19125 4075 1648 12328 13315 2562 31154 6497 7629 6430 18664 2409 11512 4449 1398 24376 5108 7615 17537 11496 10938 23607 15951 4257 13408 1073 24328 15679 10140 15686 8193 1429 13812 1253 13485 7992 35283 30398 12347 3747 12645 12497 6500 1066 15672 7494 29153 7638 35420 12147 22429 11961 35308 22674 7630 6537 19127 30986 37565 19948 34471 12595 2482 29885 24332 5098 30598 4517 35176 7769 7991 34958 35244 15897 7796 28872 30121 30601 35668 1328 24391 11880 24370 37394 3273 15266 36279 3729 13401
943 15281 13223 7939 4860 3069 786 81 7428 6465
944 20783 3389 3411 945 931 3401
945 1108 4228 1948 6663 1036 1046 1042 15 5020 10569 13372
946 5361 22775 9989 2781 10487 24607 3555 13040 9291 3632 10232 35842
947 1607 11661 8832 4670 12149 4663 31003 3345 4169 1659 1524 17341 35244 15681 1053 1130 4170 9800
948 17709 7239 3087 6272 30162 31499 7702 1003 5037 37395
949 19816 1889 5451 13071 34990 6190 9736 11514 1488
950 2628 6614 8360 9019 1737 11877 35992 2522 17185 14374 11895 6200 7210 7634 29823 19707 20000 35983 22606 2634 4122 10639 2558 21312 31126 21866 2336 36044 11832 1256 5196 31180 13094 32336 31510 2531 35743 2559 4461 18587 2663 1471 2127 14730 2232 12857 28871 2257 2430 37361 2434 16422 2421 2530 910 2387 35435 30104 2519 26189 6497 1156 25812 13948 9456 2366 6424 20683 2089 2630 1696 12026 1802 5809 4261 24929 35705 29043 6433 19741 26890 17424 4216 12574 10871 2354 28754 5785 9822 2373 2963 22196 1547 36268 1373 1839 2440 33505 33415 4214 2212 29406 5818 12515 2123 6220 7549 4398 5600 3359 1838 4428 8850 6215 23477 34405 12694 31178
951 2737 9622 2781 2715 1551
952 7450 1429 8923 1509 11017 1383 10717 10591 8954 12028 1245 6974 6443 6247 9210 1426 6187 7541 11880 1492 31465 1049 921 1373 1248 6607 15303 1458 13135 1421 3379 7827 4651 24222 7769 1469
953 35195 7639 3081 5353 3639
954 2409 31115 2584 14763 12528 1518 9670 8034 8364 5478 1425 13060 6531 1101 2566 1526 15265 10352 22426 14597 20302 18430 24646 23570 22427 34459 22029 22432 31805 36063 26650 9739 8355 1071 1189 9790
955 783 703 2638 2897 3650
956 3280 3600 2014 6053 3783 4904
957 4310 2638 2179 3760
958 1500 4473 1253 10133 1050 24326 12144 13477 1948 24646 7510 20681 15644 26437 31201 11716 17341
959 7653 16978 8435 796 14521 19668 5051 9177 19682 10709
960 32009 22038 1091 7389 1821 918 7394 9422 8561 1058 7000 11571 6291 4205 2607 12145
961 9400 2632 4228 1058
962 842 75 649 762 10347 715 2897 852
963 8303 1717 3518 12 13189 4164 783 4656 6253
964 6680 12352 11517 6943 14591 7474 5594 2517 5377 7405 12592 8557 11878 24332 30106 12755 12384 9422 28724 35641 30276 11363 11256 1696 29384 7066 25264 2381
965 8732 15338 4023 15643 21168 5577
966 5605 5560 4034 5577 15284 7897
967 6176 4876 25812 9229 6207 9826 9028 1321 4530 1486 5133 1394 9709 10787 12341 1893 8261 19793 7822 3379 1248 1250 1447 927 1244 29799 904 10242 20225 11505 18319 1478 2822 10650 5472 26199 17290
968 10598 29275 13495 29950 4937 36836 12638 14918
969 13790 17861 3304 826 29988
970 1269 996 601 12196 3475 1271 614 9483 10286 19029 589 10292
971 22637 32282 1733 31623 14472 31400 7664 34186 22924 35621 10547 14261 37153 31418 20510 12826 773 14348 1707 8436 15 676 7884 2706 24593 30815 11652 14553 16748 11800 18251 23373 24108 17431 12728 14449 1781 8493 35128 11801 28207 626 1370 25378 14450 18409 19352 22932 34266 19346 28417 22352 23933 36683 7756 14448 26720 22909 37118 26250 34976 35437 25381 1283 22755 29083 7934 29079 25402 36251 6297 11090 10550 18210 35431 24104 30290 7728 32380 10548 24313 18689 18688 1286 18686 7693 31420 35436 1292 12954 10338 37150 10511 1792 10513 8448 11889 34756 1754 33798 10344 26421 31421 13930 14270 36661 35539
972 9582 5858 6834 14369 26987 28888 6960 13025 11694 31530 30703 33688 33683 28895 10463 12630 5395 9988 20400 7963 15431 29101 19675 11892 28899 14427 13031 14442 12886 19639 14441 5323 35864 5841 15445 17704 34352 9581 20614 17918 14946 13036 28135 15459 24039 19629 32697 2885 1002 35024 32632 31511 11116 32990 22277 34503 24889 19571 9120 25479 12885 34421 15479 26646 36974 31709 37248 15468 15455 3418 26014 15446 14617 9111 19723 19568 34935 26073 851 9051 13487
973 2725 690 4493 783 762 3777
974 4555 1174 6623 1957 12646 14884 4257 1481 1248 15339 2511 10140
975 10902 1334 9229 925 1828 13919 9450 5822 8175 6658
976 7174 2678 2798 1534 2787 1053 1256 2384 24329 19735 32485
977 9551 5336 21554 30568 14307
978 17208 1179 10791 7001 14721 6 5134 4181 4654 10972 1596 7098 2064 6841 5 6439 7509 9868 12759 17110 7699 35287 23554 11979 11663 1073 34669 15943 8864 33316 35684 10683 30834 7631 8376 15272 7635
979 1361 7729 12802 12747 31764 14089 1786 14127 22349 18693 2703 14021 22935 5158 4501 14068 18144 13974 14153 14064 34314 5428 11928 1782 19791 1360 15915 26286
980 28913 35666 32789 33935 1533 15444 32608 9566 2482 20716 4661 33588 4663 15660 1527 1257 1134 10664 6551 25047 25093 21870 17580 23271 19420 36606 23260 23273 13280 17347 17473 19990 25821 15226 23873 23872 21912 23258 726 3169 23255 19468 25689 10572 17472 33107 31189 26836 5868 10484 5173 8402 852 35850 9799 34232 20400 22412 30241 31911 24464 15055 31222 10488 8436 4329 35916 24864 10485 5326 22781 5801 648 6928 24457 25459 28949 7429 29053 34917 14925 30747 21837 21527 34672 9502 31151 10462 24579 30058 24062 8601 22279 35329 32989 26382 32606 28966 18170 7242 32791 28915 4510 2724 24463 776 2017 36958 29397 9986 6826 9279 35886 9579 25144 4506 3787 24561 772 3604 16623 18674 7949 5869 37089 13791 36043 34904 31749 10405 11226 31713 652 16377 653 12897 32633 5210 21623 6765 2904 8626 14991 23848 1015 14544 30815 8680 13918 22144 7938 1534 30240 6385 9289 20435 35816 34929 2907 28962 716 2022 1531 32140 2779 19721 13372 15052 35842 4502 36004 37943 37369 37834 29993 29051 24462 816 6038 7880 15508 15432 23686 21409 15436 23501 8415 31751 24449 31755 2734 19864 29054 9564 12906 35512 35239 15461 37499 11735 22762 10482 17709 28881 26012 1538 17921 34673 36744 34556
981 8757 1839 13 6307 2360 8200 6647
982 17673 25198 4605 8136 21702 3390
983 22386 12512 9014 26160 19195
984 2930 2851 2965 721 654 12
985 1143 22571 1073 30505 24373 37620
986 11498 18431 33743 6463 15177 5482 2127
987 22893 20451 18136 7570 3729 35531
988 30310 2172 9052 10956 11520
989 11807 2641 7600 32270 20418
990 1315 2620 7199 5255 4455 10083
991 7271 4982 8121 8120
992 17680 4617 2293 34457 8777
993 12497 4189 9382 11835 5571
994 1006 3418 768 3284 2964 15 1025
995 4126 2236 3141 1328 2096 2297 7558
996 22593 5477 14244 10652 9703 1633 11745
997 682 4164 2787 1003 710 1006 93
998 5431 15870 14551 1757 14065 13158 11263 970 18864 6024 14549 14116 770 795 22061 6147 26583 14078 10733 3171 21566 8081 25806 632 27034 28215 20168
999 2886 6029 652 3529 710 762 6278 1543 4495 5148 4274 8325 3680 3513 3641 3628 2902 1025
1000 8072 15373 22563 29666 15038 21796
1001 12568 6316 11180 20245 28235
1002 17981 10275 13958 13419 12972 12204 5290 15389
1003 3580 4237 704 11396 8644 6649
1004 12235 26018 5885 6332 10189 6300
1005 9474 5378 4274 826 13790 13573 36351 15303 1078 12897
1006 3083 3064 5710 93 37692
1007 13277 33077 19577 25054 4949 19701 34504 24611 13579 3077 28379 19676 17127
1008 32124 24109 3121 22645 35043 1729 18307 14101 15484 37798 35903
1009 5046 25699 15697 23288 14222 30912 21751 8329
1010 69 11071 2887 8634 11229 5322 9569
1011 4899 1444 6268 5051 11707 811 3063 3681
1012 2428 12137 24331 5228 2366 19470 5381 7324 31198 7111 2537 2472 1893 30810 18431 35388 36588 31691 34933 15475 911
1013 14202 35934 15520 10465 34232
1014 17717 11025 25010 774 11387 14334
1015 16384 8287 4936 721 4711 30441 26483 18499 3918
1016 2199 2682 10654 1441 2916 1214 1104 1105 1244 1837 14589
1017 7627 11547 4015 26094 33584 25565 1457
1018 826 762 2786 3245 73
1019 2284 31298 2525 7630 12149 7472
1020 9545 6649 4331 16384 8 3479 13566 92
1021 1489 1430 20319 1249 4267 7753 1166 4613 12581 1823 4186 10591 11716 1638 4351 9768 5627 11576 1855 1387 4229 1056 2822 1492 2512 9420 1137 7802 15326 3380 928 905 5820 1953 16935 1494 1333 1245 8266 11482 1854 1799 907 10642 1232 1642 9414 781 1256 11583 1196 1654 8271 1496 10787 930 8238 2445 1893 6922 11532 6186 7786
1022 5262 948 946 8132 4039 4279
1023 20457 3444 21012 10122 24101 24744 6328 19251
1024 12925 19222 2547 13760 7074 8562 11661 8476
1025 3558 88 4278 5906 668 10802 3519 3514 11386 11318 3500 3537 703 7609 855
1026 3426 3495 2023 6651 2714 2902 3245 2815 24880 3651 2706 3490
1027 9916 29 9914 15542 2017 87 8629 3430
1028 4476 799 4327 1057 1375 7780 4405
1029 23354 13121 4103 7096 6529 16579 4449 18856 24324 22036 7882 19945 19997 14589 25229 29419 35795 2028 37098
1030 774 650 764 12 31933
1031 9578 710 28281 3419 9989 3510
1032 23618 6048 13041 34594 16379 14546 30160 1018 23946 3634 79 6015 9981 15412 3590 15474 13280 21356 33391 14532 12911 14677 22267 17631 37961 31585
1033 3212 6332 10147 11177 6335
1034 8412 5148 4711 15754 8669 5599
1035 630 1736 1372 5436 1742
1036 14423 24452 5157 24579 1114 16606 34512
1037 3248 3536 5020 9567 2964 1538 10752 37364
1038 6722 30490 16611 10463 5381 11397 15461 10427 15052 8693 31712 27795 18169 29222
1039 10063 2946 4083 6673 19571 31166 14686 15702 35352 35818
1040 4498 765 2737 5685 4555
1041 5026 4590 21624 12831 9284 30815
1042 4526 1616 1761 1802 11598 13115
1043 29480 33989 23182 32831 15937 35993 16419 11275 15624
1044 1458 1465 1468 1658 6185 15897 10251 4513 9706 1795 4219 24110 1187 15268 7002 1487 8955
1045 12427 21891 243 17037 14519 323 20630 4883 21938 26219 2983 284 21896 21990 403 122 235 12441 113 5552
1046 614 585 2920 4684 581 5291 836 608 9929 3090 7529 13955 4694
1047 5807 1996 1141 1476 930 5592 11833 1189 1803
1048 3236 16418 9840 28036 22019 23834 3372 1471 28039 36742 26095 33821 2358 9454 20478 33527 2071 32438 15173 30045 5511 11520 2597 9831 29617 33817 25229 25958 26106 2038 8826 31526 16431 31907 37702 34549 4474 11864 30276 32439 2662 3294 8956 2092 1995 34105 2412 26206 37518 4669 28055 37519 37455 20408 2028 11993 2503 11547 9425 6968 34087 29435 2558 4300 2599 13807 13142 7478 11552 37901 5778 11877
1049 8603 3281 6860 15052 16378
1050 4977 23849 8415 23238 29275 17119
1051 30587 19959 11922 12891 29825 19475 13785
1052 1960 5743 1210 14575 22072 786
1053 6654 6902 7082 15728 19097 4330 826
1054 11546 10627 2068 1189 20224
1055 6077 15798 81 1121 904 1156
1056 8343 9569 30063 17149 13018 14369 19701 92 10236 30490 10812 4274 25352 21405 9989 30617 7435 14388 13041 9287 15443 22271 7247 5396 31780 14374 10496 9100 24876 8596 26480 29645 13034 29149 1018 10482 10241 36792 8649 2787 34232 24452 15440 14438 9582 13609 35512 29053 2175 28848 35329 24457 23848 15439 24864 25860 3615 28964 24464 1941 35259 19864 13040 9557 31449 31749 27835 30463 15474 36639 20437
1057 1025 3597 13508 5907 30102
1058 1682 18793 1528 9559 3315 16085 3918 18452 16539 18720 18530 29849 23253
1059 2932 5580 1053 7485 5 12504 10 1810 868 1718 1105 2023
1060 23294 1478 1449 26444 13668
1061 9718 17246 2409 5465 2264 2206 7100 8830 6697 15135 24338 31509 10320 7510 6492 15265 20716 7508 7630 11511 22438 8365 1721 1256 1203 1487 20302 7794 1398 9834 7038 1515 23882
1062 12667 25953 26801 31253 3027 21453 21454 21785 21794 36771
1063 2787 2023 710 4963 17743 15514
1064 9121 2781 10730 2927 665 2761 11701 13019
1065 786 769 1003 2784 8037
1066 10469 3529 8756 14656 12331 17920 13024 37138 28892 10212 31500 24590 7314 11300 5685 8667 25608 25942 15446 21348 5868 26371 29798 14431 20584 11123 4303 33984 860 13033 35775 5270 27795 8592 3493 36919 24713 24063 30067 8018 30069 12261 30925 13662 24460 18667 14439 26572 23686 2897 27882 2015 33590 739 3517 30930 35842 6750
1067 12 762 813 3483 1716 1025 7939
1068 4498 18790 24062 15615 13014 2942
1069 1438 1526 5750 4388 9761 12855 1032 4520 2705 6576 11084 1264 5228 11518 1146 15241 1464 5462 6492 661 2075 13744 12383 7506 12717 24323 17927 19124 9860 11336 5473 23489 12878 13747 13308 15338 9883 7780 9834 1043 1442 6430 11547 22043 1122 13900 24344 7636 9833 1449 24332 27792 24348 7491 23295
1070 2120 20197 6648 14243 927 33985 14754 5031 5087 14689 1198 3425 8203 16387 6246 5750 2292 2224 5377
1071 3421 1535 4313 4589 4914 813
1072 655 4899 12944 11 28780
1073 1053 8267 1471 1904 1518
1074 8396 3643 2964 7544 6063
1075 2009 25366 9675 11669 8777 8193 8858 13851 6525 13754 6504 14744 17205 3708 10250 15629 20278 6540 7637 15277 4544 6558 37514
1076 13754 7197 1522 17729 4459 9229 4458 4388 1039 31263 7559
1077 12914 11080 12304 7403 7473 12073
1078 904 1145 4126 1388 4454 1482 16729 14092 1302
1079 8933 13734 4534 1638 5118 11508 15736 1982 20221 24223 2362 9826 906
1080 2179 3490 7423 3684 703 2760 5370
1081 33012 13327 972 709 11894 2821 649 4497 4590 9989 92 2706
1082 1439 5142 11626 4530 4376 5090 1109 1126 5122 2609 2576 10972 3832 2916 1325 4072
1083 1064 1321 1114 1420 4473
1084 2936 2763 2784 1015 2801 1025 8695
1085 2902 3506 5498 3479 13770 1947 692 9197 6278 3250 3300 6673 14540 18504 10400 4330 4974 3314 10605 3652 34462
1086 28629 21562 3006 244 17561 12453 3010 31136 34089 28633 487 10558 29576 9515
1087 10486 15479 3811 28900 772 35202 35960 18367
1088 92 1445 4766 3918
1089 30292 26058 2538 36966 19555 2630 37092
1090 902 1518 1854 930 1913
1091 25118 9215 10194 4237 24638 783 13046
1092 938 4059 3407 8120 8127 949 4048 4043 940 7212 5185 931 4052 7264 10023 12193 13958 8134 11371 944 943 4062 4047 4063 3400 4983 3389
1093 1887 2293 6097 1979 11983 7752
1094 1097 25454 6688 1330 6233 1248 1104
1095 6068 11596 4461 4527 14747 10869 4651 1701 906 19872 1496 6214 5632 6118 2482 6554 1177 1588 6077 26180 9386 29161
1096 8586 4162 6653 3771 7425 2902 765 1540 5181 3584 29431 979 10600 20399 2959 648 12828 30065 19853 4969
1097 15275 8369 30591 13906 11521 7635 6 30377
1098 11396 3605 4963 714 12638 2964 5379 21219
1099 3817 5850 29982 8626 15419 3628 8437 17744 5357 859
1100 6490 1330 8858 26605 24390 11501
1101 9624 2017 1541 8649 93 2012
1102 6436 4707 4639 15502
1103 29090 7794 3268 1044 26213 4417 6092 10621 4439 5100 9387 16439
1104 1189 16743 7634 3722 17185
1105 6580 1244 1598 2163 1102 4630 2682 1045 8261 1324 10251 1077 2699 4512 929 8271 8959 9735 9788 914 904 8200 13 927
1106 2014 3415 4097 13 4587
1107 15269 19209 7151 17558 21527
1108 14288 18428 6173 6969 17205 29143
1109 1413 1441 6092 3831 5643 5253 6105 6108 2911 11842 12484 11712 28603 2609 1405
1110 1321 918 1573 2303 10973 8557 4348 17515 5514 11908 32009 5786 7403 25958 1471 10648 15623 1659 1831 6182 7253
1111 3695 9279 1532 10482
1112 2720 1549 654 1716 827 2784 2819
1113 22019 7493 2362 1189 3728
1114 14969 1330 10 1480 1455 4403 1176 1256 13290 4257 1245 9751 1062 19218 25186
1115 6386 2098 16581 15241 5837
1116 13383 6636 6615 10350 13121 4344 9472 2058 7114 2106 20532 32889 2320 15667
1117 19713 26212 34308 33653 19655 32465 15446 10608 76
1118 2199 17284 1631 7490 8845 8813 1880 1556 10138 16585 13129 15241 1114 10951 2064 1661 4670 19223 10133 17479 20307 7786
1119 2826 11818 29213 2780 1538 3601 5905 15 2786
1120 6636 2466 4343 1380 1580
1121 12004 4522 5537 4178 25666 13728
1122 7242 21860 6202 32477 5396 15393 33667 14436 25342
1123 585 570 16859 10019 17680
1124 13132 2705 7626 24378 33992 7966 13717
1125 852 19532 34832 17915 15598 13524
1126 3839 11844 1449 6308 1067 1633 1117 4643 6168 18658 2050 15794 1447 22592 2910
1127 34967 11516 2531 20236 14793 33817 31907 34105
1128 11742 2191 6184 1190 3371 6196 13071 3 18003 1917 1034 16935 10126 7012 6974 768 4516 4859 2806 1902 35287
1129 2804 25146 810 9989 9501 9986 11894 2797 852
1130 11645 2320 1114 3735 2679 11630 4390 1567 9625 1928 7061 7752 3274 7121 5812 10857 4181 12356 11486 6393 1056 7074 10783 1091 1242 8713 9434 1720
1131 2797 722 2902 715 6951 2012 2706
1132 5033 16149 15062 16150 13426 7929 33418 63
1133 2141 5204 9702 8202 3742 2686 1383 1556 4643 7485 5 3741 1887 1105 1598 5619 10247 8248 6381 1250
1134 22126 10395 3650 770 5018 10462 6198 852
1135 2604 17207 13840 13819 13863 6204 29791
1136 26080 17595 17464 31232 9799 17358 26320 25552 7765 19405 3169 24477 11411 6649 26202 33329 19086 26127 17594 33517
1137 2301 2048 1881 1846 2008 8918 29092 1949 2317 10790
1138 8806 10880 8198 2058 25139 30278 660 24374 4410 7759 7769 22883 11531 30370 3348 24340 7570 4257 33194 37413 1633 1122 20795 16584 6161 1049 2466 2320 2617 19218 36985 22426 32021 6403 31744 8369 4658 30111 37720 4335 1556 7987 1264 12143 2216 36322 31179 6647 17291 36045 2229 37843 33994 19125 19127 1087 9830 22098 11955 31177 5522 37881 34874 25329
1139 1460 1471 1121 5531
1140 1030 20035 3301 1039 9424 4440 4343 1979 11884 13370 6408 3736 13376 6391 2191 4650 11946 22996 11021 9009 34963 13287 13382 1109 20198 8807 15246 1245 6543 774 23546 9781 25112 26724 30910 3821 8200 8808 2239 2294 5626 10900 24110 12143
1141 3130 783 785 5073 3643 18631
1142 20044 7636 11482 2512 1336 24325 905 4217 13762 7792 15684 13878 20075 8808 26223 31464 12346 24380 13471 24376 1522 24688 11842 6531 24370 9229 8376 13318 1434 4211 1397 2618 1136 30368 13408 15257 11576 12272 6493 13 15681 1422 909 1143 23558 3379 2348 37237 1698 35860 4386
1143 4091 3426 774 6385
1144 1109 12823 973 1840 6261 8878 5175 13770 1551
1145 2531 20248 36013 4388 15685 30451
1146 1480 4454 1659 1607 1051 1457 1260
1147 1034 36403 29721 9882 9884 22035
1148 4193 12042 33293 20073 31593 15674 10850 8752 2341 2296 32642 33838 15638 13 24375 13470 1927 12138 1697 25333 11488 15688 12145 37186 32253 9811 2588 2533 2558 31447 13313 5007 1993 21560 6155 13448 2216 2153 15686 37139 8885 36268 1373 7155 18792 37915
1149 1432 9736 799 1109 4346 6225
1150 4331 1696 1688 11575 12834 15147 8774 8795 5462 11603 1090 2677 15844 3045 5784 1896 8763 5766 8777 2902
1151 19101 4599 21969 21 148 5367 15033 15034 34530 18077 12840 417 26 4805 17062 236 5954 19098 24657
1152 21785 21777 21776 32210 3026 19913 21456 33163
1153 6658 807 760 783 7435 9989 9501
1154 29543 10929 17321 24703 12413 12428 31250 57 9511 144 9599 4805 8072 252 17042 477
1155 20719 17270 11181 2652 17271 3407 8513 4984 8134
1156 32912 6900 5650 6944 24987 75 7261 5393 16981 34503 5319 36095 13615 21339 10107 37018 14919 37608
1157 1478 1039 2098 20493 7158 1073
1158 5396 17449 35210 19678 18170 34930 719 21410 34344 27975 19847 6722 37051 27835 31707 31752 34464 4999 26013 5021 30464 37370 3683 2723 8143 35985 28968 5325 21353 26014 23848 3643 31755 34935 37339 26869 5063 34594 26811 12691 11226 37476 35842 34934 29051 37603 32540 25596 36490 34933 31713 5339 20438 13277 30206 36463 14410 657 38047 6146 31712
1159 8680 11633 10501 26429 34462
1160 1351 7668 1283 22330 1347
1161 2012 2014 1004 1716 1685 3780 2718 2902 2813 5020 3783 3817 8171 3802
1162 1590 19209 4097 25135 13449 30372 1521 11093
1163 5404 15866 19791 11794 2706 16468
1164 13748 7501 2247 13752 17537 1800 14779
1165 2803 2904 2737 2787 10952 4509
1166 23140 2246 31455 25188 6092 1426 33700
1167 731 2636 3245 765
1168 10505 28430 17121 7762 31887 7428 9988 8667 15456 14643 14374 15457 34904 24459 9569 24461 18174 776 3356 12679 22287 4991 9893 8668 15092 32791 12015
1169 1499 1259 36414 4449 1066 1032
1170 22533 4665 35486 2525 12578 32623
1171 6985 1876 17401 13120 6223
1172 4381 10809 9182 34881 3626
1173 1029 14641 2737 13663 4994
1174 11 827 1941 1682 4111 5014 8529 5685
1175 41 172 334 199 233 5937 12319 5949 209 5930 5950 240 2983
1176 8409 2781 7545 10730
1177 696 774 2784 8307 2796 4711 769
1178 300 10310 30394 25415 4834 14700 5551 5935 4885 4816 29415 502 264 8027 17064 417 5938 17065 194 17028 22
1179 30814 27878 23883 2787 26011 2615 35690
1180 9322 20227 23125 2172 25620 32254 25616 24283 12501 36244 4867 8376 24031 6431 8269 31267 2632 31277 2342 5778 7631 7827 13312 33789 33928 24848
1181 2706 1826 31779 3284 2785 1016 772 14902 21455
1182 10039 27923 15996 23862 11413 13533 18399 882 20424 7525 12170 10044 21328 3350 28025 34840 10572 8369
1183 2043 7132 17204 1473 1317 1518 2106 4186 1256 13293 2623 5581 2033 11325 24129
1184 2679 4477 4476 704 11981
1185 2028 1423 1259 20076 9019 2902 35670 8376 15666
1186 13880 10857 20018 14633 16466 22576 4650
1187 3600 2763 762 11652 10753 8693 20240
1188 2170 2012 17639 653 3770 3651 9241
1189 1393 1391 2933 1478 11505
1190 2250 8859 1044 6215 1046
1191 4488 8574 4630 1486 1240 14602
1192 6156 5370 1001 7260 2022
1193 20038 15103 20077 9357 13729 3744 899 2382 36582
1194 81 819 10890 2787 2020
1195 2805 649 783 4301 1025 81
1196 6575 13734 26224 2559 7502 37237 5485 12855 20235 30917 13756 1816 1442 2602 2342 15749 11326 19807 1422 4170 11980 659 25243 1103 6518 15500 24352 16419 2531 1887 17245 34957 2224 1035 24370 4337 13319 25137 37789 1097 10133 8369 35669 11983 35308 20540 37550 6513 2554 1910 34958 927 20321 7489 24378 1797 9746 11966 8267 14807 2477 35543 30834 37261 13739 36848 7498 2558 14794
1197 6058 11049 19065 6877 31828 9236 7573 33656 21405 34392 28902 35583 13281
1198 4443 12517 30277 21603 20507 13900 6576 15749 26846 2342 31141 796 24379 30171 25138 4871 22429 6442
1199 2089 21267 13911 11330 2026 1196 2395 28120 9625
1200 1453 1143 1618 9789 12514 26900 12717 20807 1522 14888 906 7765 26605 29963 24387
1201 14972 1146 37931 15684 7510 1330
1202 4193 10690 9869 5581 6602 8382 5531 13760 6180 4549 4270 8792 9468 15309 7184 22670 7019 12308 9052 10130 12135 2267 16988 22886 2197 10647 24973 13872 17281 7910 8557 6605 11879 32688 12138 37388
1203 2910 3047 4648 259 10630 33556
1204 6391 2375 7111 13866 17245 1617
1205 3778 2781 9501 2019 652 1548 2867
1206 4500 2805 6651 4301 2806 14927 1860
1207 8523 23714 9301 5884 23469 14237 28541 32982 6599 8166 35602 8096 28419 3444 34883 33624 13363 8106 8117 30023 6376 15828 30849 32844 28778 36314 744 19250 36313 5030 32812 30026 36022 36309
1208 15 4162 2902 845 710
1209 12218 16399 8090 3836
1210 4963 868 20194 2821 8667 10449 30065 15112
1211 1090 1052 10941 1056 1956
1212 13008 5126 4636 24320 3717 24319 12912 15946 1590 18320 6549 1244 23581 13747 29096 13866 7123 4437 7089 35535 11097 1509
1213 6170 1425 1034 1607 13717
1214 8705 5319 3768 21831 8670 17648
1215 721 773 2926 4864 5020 2897 2787 852 810 2763 2706
1216 1532 10862 33503 28720 9087 2766 27795 13790 2926 826 3604 2022 26652 10752 6653 814 2724 11229 2757
1217 13477 31846 31002 9825 7403 31577
1218 910 10125 1981 2705 15585 31264 1101 2494 7187 33143 5465 4550 6403 4551 13750 11550 14779 12593 10068 2596 25545
1219 657 2179 20255 28566 27578
1220 8768 8955 9016 7633 4632 1244 6574 15148 26658
1221 9550 7130 3245 4501 15457 5418
1222 6334 12553 6356 25535 21113 12568 27788 7859 33132 28547 28421
1223 4522 32629 10679 1103 14602 17483 23913
1224 4498 776 2756 8433 12827 16 12679
1225 7570 15251 7485 2535 13906 11600 23131
1226 4514 9432 16444 10967 5746 20443 16417 11977 25042 28952 14738 23153 7565
1227 4095 10357 1116 2617 4097 12381 1258 4180
1228 7001 2705 904 9751 9857 31199 17342
1229 617 28819 5303 25526
1230 3111 1341 31502 18265 28215 13145 1305 18697 30779 14079 32374 14259 14101 16045 20942 21411 24784 9609 35807 15818 26837 25381 12722 14554 22635 33327 34991 26858 14063 22644 15913 11640 31768 28212 37001 11768 34758 34185 33014 8167 14497 18704 22939 14551 37424 34992 14109 23925 30297
1231 8404 2899 29948 3300 6258 8406 3305 9574 5175 11287 665
1232 2372 1621 1998 3343 2248 14808 26095 4339 14780 25616
1233 17870 17873 3465 12180 9932
1234 6391 8372 8804 22602 15263 13871 13738 33618 6565 20302
1235 10900 1245 7490 4483 6519 33583
1236 33384 3095 3126 22348 13907 36816 34758 14083 3327 1796 28757 37919 5416 33366 26858 37150
1237 8262 9768 2135 7151 1513 905 7822 1039 28129 4472 6972 10257
1238 31995 20552 24358 24841 13753 33231 2407 33992
1239 199 5969 22556 24404 17152 222 4597 7052 5829 2739 769 2851 4502
1240 8252 1413 1261 2417 17425 14287 15575 9857 7182 9695 1515 2098 14974 10005 1130 1087 1956 30309 11337 4172 36535 4439 13485 4255 9764 37047 20442 892 10680 4654 6435 6183 4375 9363 2632 10900 1522 1104 7627 11477 25554 6219 1513 17245 17677 8839 24946 2621 11966 14418 10133 12755 15577 11521 8828 33072
1241 15 2706 665 5339 12679
1242 11876 5091 1322 1111 1244 7558 6679 781 7561
1243 20852 15597 20155 18291 14877 16835 24856 16163 8766 884 18329 20889 23135 29367 18185 3170 2696 24515 26527 4777 19168 3186 12785 16684 3171 16817 21812 23960 18955 35291 29958 15617 35221 26472 23956 19524 20943 20942 16714 23592 23966 32504 35573 32507 30388
1244 4066 9030 19924 23465 1665 4674 994 4689 12250
1245 23044 23120 16601 24235 30071 17897 30391 26457
1246 3846 16951 4795 18873 11457 25962 877 19748 15999 26943 10282 3161 16028 28459 23973
1247 35417 7604 14876 21370 300
1248 5147 795 18174 15 650 4686 25613 12313 24062 5339 2790 24449 4500 9499 774 24457 8464 4729 4589 32989 13671 10796 14955 765
1249 4145 1053 6167 2225 1250 2050 5753 2533
1250 2258 2417 1087 13720 2331 8836 20755 1330 37184 5124 33421
1251 17895 16782 17830 7371 24521 18499
1252 29199 27188 33457 37171 20840 27665 30512 27691 27730 27417 30446 28747 31297 37477 17823 30448 37739 29290
1253 3264 1602 1069 14484 5215 8810
1254 9256 31713 6947 36089 5323
1255 2803 4500 17862 1541 2808
1256 1537 4301 4231 8277 762 5012 769 6654 3490 6909 2765 721 6926 13566
1257 271 21759 169 5998 114 14904 19184 5549 274 208
1258 19521 36823 16028 9528 16601 16101
1259 11540 2482 4 24684 25139 2604 2477 1805 12925 7752 7635 2381 7658 35200 3248 2403 10377
1260 2883 2938 93 770 2809 3312 19462 21571 19411 20519
1261 34227 31494 33257 13793 36452 36057
1262 3202 2649 7838 35192 9873 36314
1263 20889 20092 18719 23331 16336 24931 18932
1264 24840 7501 25934 1712 7500 2604 15313
1265 2759 8 11245 710 706 3784 6717 2902 662 11056 87 777 3312 25146 63
1266 1836 4297 5769 1044 3339
1267 10707 7371 16601 13433 18458 23042 23306 11112 20843 21812 16675 15986 18932 16953 15977 864 21289 7387 16798 22502 5071 20942 18284 18438 16801 16676 21668 20838 18988 26484 36067
1268 3607 764 7120 824 3541 87 10427 7586
1269 5020 13769 8281 9501 9490 7881 27023 4509 22199 75 2812 688 31885 33567 2014 2791 26814
1270 1529 703 20400 770 2316 9459 7111 12713 31273 2604 3227 1039 10969 24457 2566 4526 23686 5451 12336 22437 2467 24361 22531 9582 10508 3804 5811 9577 4327 1136 2564 2248 1256 35244 37747 8828 1515 2458 6204 15684 25329 35179 37971 37837 35795 26094
1271 737 5020 12 81 2819 11120
1272 12825 812 8408 868 15 9551 16746
1273 69 5177 2853 2904 6954 4502 9474 22267 9013
1274 2531 4654 6431 25618 10632 8774 9697 10900 6430 900 16585 23554 8192 15064 15311 13485 15644 12932 8717 11660 17681 13093 1136 6439 6618 8830 20411 1176 30126 21170 11503
1275 15782 22183 8106 13341 13357 753 36585 34707 11203 31493 36314 36788
1276 1541 6624 11 4330 827 1535 10380
1277 3050 9092 4208 6180 7786
1278 16916 3863 11450 16872 16017
1279 774 765 2909 2777 8658
1280 3493 2806 4549 1541 7978 4301 8649
1281 10591 9838 1524 6433 10005 7502 9834 4670
1282 8036 3167 763 1543 1025 7130 11650 5488 2948 8021 8667 4585
1283 1128 4135 6680 5803 13142 3451 8203 20797 30288 11631 13799 17542 13894 11486 9459 5782 0 7875 2188 32802 25815 5825 10899 14731 13760 2172 10766 1094 36704 2079 22600 26104 5215 36190 2513 13310 10765 2336 4665 23837 13090 1478 35797 782 7174 25137 15173 2219 33601
1284 5511 5791 1553 1596 1862
1285 3488 716 25245 5040 14181 2879 2891 727 12685 3682 3643
1286 6514 14637 6552 20032 6419 28129 8992 24258 11288 6529 9385 25967 26112 30310 37312 31310 31212 32026 18362
1287 2949 9122 860 6126 12 10425 2887
1288 11559 15274 7627 6490 1524 31833 1419 7631
1289 7048 7493 4361 27920 1262 23558 9834 8717
1290 5063 6256 4301 3584 22410 3553 4895
1291 1050 15640 6204 2913 1378 1492 7155 19728 783 2718 1025 17339 37689
1292 18866 20388 23092 3895 18552 3874 3846 3853 16562 26730 7929 3854 882 3905 875 11656 29756 21580 18187 3883 24980 3877
1293 8081 3926 16295 29315 16741 20861 24765 26617 16189 3999 23297 22311 16327 27286 29231 21295 3196 25231 20768 3432 3945 883 28116 23020 27144 24627 22483 27859
1294 4515 1971 15645 4664 7501 6497 6511 20227 32028 4654 15500 31213 34671 35179 25138 19224 12932 31274
1295 2739 5018 2819 3167 2724 13667 7130 31431
1296 6689 1452 4102 918 5462 8267 2593 2804
1297 3394 4049 4986 12302 8123 11371
1298 1478 20477 1233 1909 6221 11555 2486 17390 906 5837 11503 2556 2506 10272 4346 5805 3702 1263 7508 12328 1037 15679 2028 23565 17513 2392 9756
1299 15987 22701 3155 14276 20855 8586
1300 3777 3624 3650 25005 2902 3651 1934 8325 3784 1018
1301 1006 3803 5358 7545 1066
1302 24994 3650 5361 2835 10450 11409 15474 8756 32366 11636 14680 15444 15440 3789 15450 4510 2964 6052 3076 28909 29053 2724 3629 10508 10377 23686 3807 23950 2298 26811 14223 25679
1303 7649 7722 4293 3541 760 2798 18965 652
1304 9084 3162 7365 16081 16256 29728 11457 16843 16964 23163 18475 20103 7726 18491 18456 25222 18737 19509
1305 25514 862 18515 16278 16087 26527 4772 16193 18180 18883 16537 24500 18347 865 3884 16502 15209 20101 16764 3999 16320 16484 18747 15975 18004 18533 16900 23361 16854 22479 16070 18544 21515 20546 23309 18288 18191 18187 20909 23819 16966 19493
1306 81 75 8649 3259 20002 8436 7428 8696 11651 5361 4864 2706 33567
1307 26176 31180 2482 34432 2416 36658 33818 25885
1308 13170 7450 4517 1240 1250 1648 5755 4455 12377 7799 1104 1396 1466 4389 12366 1480 1245 1478 11017 1484 1438 927 24090 1451 1406 1109
1309 7519 1415 1590 26496 1881 11503 11016
1310 10761 1143 1152 11510 21322 11520
1311 93 3638 87 814
1312 1497 5108 4144 4874 2106 6606 7396 1478 5470 24273 12492 19947 15591 26927 24943 24851 30891 1377 19197 15643 11886 12491 6406 6409 6425 1473
1313 1910 1385 29282 15577 11994 1810 1196 23153 8908 12151 2248
1314 5018 2706 16 4284 7884 14092
1315 17887 16561 16026 14877 3153 26527 18750 886 7373 20767 16907 16901 16103 16122 16970 7372 881 4767 20902 16717 7365 16482 14274 3432 3980 24394
1316 19190 22609 20951 23963 20942 16601 18743 26141 23967 17879 21283 32773 24087 36458 18956 34400 28736 29163 27329
1317 10429 3137 30372 1588 4181
1318 25750 16124 7365 3432 16482 20863 3968 16647 17007 4771 18986 4777 16528 16484 16293 16033 4787 18519 18869 18186 16767 16561 15600 17878 29749 3856 20924 16072 16076 3972 16282 16683 14273 35160 3927 16283 18523 16772 15989 19175
1319 2865 10449 3529 7245 11397 11634 7261 17861 8328 668 23487 3312 22526 13441
1320 3626 17137 1860 22206 18980 28683 26370 5856 31750 18104 29481
1321 2509 4299 4270 1051 4144 1134 1518
1322 1264 8861 3300 18432 14232 4654 36845
1323 7815 855 32289 85 2845
1324 9768 15301 1518 4525 2064
1325 4820 21785 119 16233 21562 458 12527 24010 2998 339 407 231
1326 397 5996 26797 25262 9602
1327 6211 1994 11329 565 4843 12113 33213 17208
1328 3918 10733 23599 17833 27143
1329 7506 14821 28064 2262 31529 8918 24090 20809 14590 21168
1330 2775 12948 776 2782 774 12955 313
1331 16897 16329 16719 16278 3193 20935 16837 7369 16114 16061 16264 16406 3852 16005
1332 12921 2638 8343 11397 3627 10508 6385 10449 15017 3778 5176 3600 2808 23501 17619 11710 8691 10478 13615 6020 24884 33190 9279 28074 14341 31877 14443 30700
1333 10896 9502 5489 10191 31494 3312 2775 13240 6659 768 24636 1541 721 8148
1334 4080 6909 10895 2927 2904 10805
1335 773 783 1826 1001 3600 7012 24340 13480 7570 13441 20510
1336 2125 20477 23459 1567 31017 10251 7695 6103 11014 905 1176 4548 1989 1329 13627 11628 7465 22329 1203 8726 928 2028 2469 13288 14889 3379 9464 2166 13289 22666 5099 1175 760 16 1902 13125 2227 20307 25244 13207 23547 16467 17249 9745 23139 6500 1423 8538 15657 12760
1337 4 4253 7786 4321 660 10659 5102 2527 1661 5257 37512
1338 6433 9459 3 9454 7491 14755
1339 9263 1538 3645 2765 69 82 660
1340 18041 17817 19163 7374 16858 16547 18594 3157 3173 16780 19479 16012 21240 16009 19542
1341 2894 6764 2902 2014 2768 7545 787 3678
1342 2706 2791 12313 4994
1343 231 168 17154 9606 21969 252 496 9600 17567 21990 311 248 17077
1344 9153 5387 9574 12119 13954 2023 4502 24449 4498 7652
1345 26302 12018 13106 466 3027 9605 14709 5940 24053 32094 17985 31536 16931 248 5996 30202 35721 15527 30115 30493 26355 3026 22800 35957 16233 17076 12021 14902 35058
1346 558 2921 595 4855 994 4680 8054 4675
1347 1109 1503 5 3287 9721
1348 11898 31494 776 4509 2179 1540
1349 2150 5469 2517 4388 1600 919 1876 5733 2502 2141
1350 113 454 270 5942 12439 9515 12421 161 12424 10308 32203 14702 57 160 524 65 150 214 496 19098 21435 8026 12457 311 12661 464 319 12449 25954 19 12471 17985 139 471 25
1351 4796 22278 3817 8668 3663 11694 31641 10456 23302 24863 14866 18169 25474 3643 28007
1352 37869 35826 35576 37276 22004 37977 37984 19920
1353 2867 5020 3426 12679
1354 20474 894 13 10880 8483 6391 7889 17423 30991 18429
1355 13922 13000 1816 23829
1356 1275 601 15612 8048 23994
1357 19025 8045 1268 23894 17106 7525 19042 835 6644 35546 607 19053 9931 578 9485 4843 12196 9956 17132 3463 12180
1358 12132 9621 2014 4936 4860 32785
1359 18920 23389 20153 15968 9602
1360 5020 82 12906 852 3600 13372 9988 7658 5023
1361 2711 4480 31044 5370 764 11120 3259 20510 2748 656 2791 34257 649 34621 12116 3525 4994
1362 9026 1858 11856 31576 2247 17056 24927 6174 9019
1363 949 3407 3405 4059 10022 4699 10035 10010 7529 4680 553 3473
1364 1325 6104 35131 29174 1104 11966 7629 909 7491 7488 4418 4485 11101 33105 14807 6111 33433 24388 31453 25356 23282 4651 8822 23296 11961 1633 12346 37621
1365 3305 3807 17694 3312 29637 14170 6753 2853 5845 8406 9138 8616 811 2022 21825 2170 20344 6854 688 9104 6763 7544 7120 7312 6960 7545 24999 1256 14721 6998 14949 3690 19567 7235 8341 4921 846 5852 6765 7964 8412 23507 3699 9148 3606 14446 17607 8332 8321 9555 24645 5175 7135
1366 12169 12958 8003 20425 30981 3840 17900 16060
1367 5051 10395 2259 2828 27771
1368 6628 4865 6814 15515 23497 704 3051 31548 8752 17919 1709 3784 4272 5395 32989 852 3127 28719 14404 31748 814 10218 7453
1369 11898 69 7147 14364 2179 15736 15046 7150 1500 15299 6508 30082 3027 21941 4724 8026 32460
1370 586 558 22497 17336
1371 18602 20922 27583 27232 3773 18173 22771 22282 772 5323 13684
1372 7130 5492 2803 9501 3600 2023
1373 5209 7180 1504 1264 1843 23119
1374 14905 21686 30547 26333 18920
1375 6059 2821 3490 2965 2907 3625 9366 13438
1376 3678 6732 7573 16384 14947 37857 6798 30815
1377 6443 20284 13876 23125 32029
1378 2826 11397 795 6203 9501 9498 2796
1379 10066 2453 4200 10938 16161 929 14520
1380 6695 9903 2030 31126 2374 2352
1381 14643 3077 5670 3513 847 8656 35841
1382 1934 2012 1541 2835 7425
1383 4149 10588 3367 13811 29492 34179
1384 13976 6337 14082 12803 9618 18416 11931 14011 17432 11929 22624 15875 14072
1385 2292 31002 2552 29095 8468 5514 6531 30106 17300 23941 33597 10884 8838 7287 2095 32995 19998 20062 29588
1386 6381 13719 7567 1104 7123 1077 1240 2109 30104 31201 10883 17556 1518 2562
1387 8810 7125 2422 17537 8866 15103 19363 2108 7184 26156 14766 5581 5214 2047 1172 12387 22418 4665 3216 11839 8827 5484 2324 13814 35705 2368 1119 1597 7026 30123 7508 1703 7042 8839 5476 2070 25924 7925 1840 1091 1492 2461 4733 9818 11959 2507 5463 2078 9454 24359 2932 13138 8826 2513 1259 14418 6237 35435 2025 9467 26137 2597 2598 6581 1471 2537 14756 2392 2271 1481 10128 1115 31595 8813 15669 2579 1056 21689 24340 3726 13905 34769 15321 8271 13051 26181 33194 13314 26183 18427 29412 2558 31593 1442 5215 26187 1084 2516 30121 4328 24684 9692 34323 10951 13930 26933 29479 1798 14419 17577 25137 1203 34458 37098 2588 1818 22426 8180 29657 1814 34325 2221 6492 20235
1388 14807 19127 17686 34296 8853 37261 13233 17328 11028 37807 1513
1389 6347 14607 20502 15832 7854 12228 20547 9998 6356 20612 10182 7858
1390 7559 2019 35963 4617 69 2787 3778 36659 8702 7604 3351 11254 2066 9459 5761 9390 2367 2607 2321 19816
1391 15575 13866 24646 25138 1114 7626
1392 2255 8762 2389 2149 8963 4337
1393 1530 4991 8020 2729 11 2784 2812 2867
1394 1944 6092 11351 1968 4410 2633
1395 4326 30377 30370 33411 29591
1396 5373 14682 6926 19024 10738 2141 19068 1709 3047 69 3346 3760
1397 1840 8563 11567 1244 1102 1130 3383 2624 9454 20180 7568 2119 2394 23745 2120 16742 22021 14612
1398 2783 1531 7880 648 12679 35462
1399 6247 3708 1663 5102 7995 23569 11018 11329
1400 6236 9712 9020 1068 9730 1721 1114 2593 2685
1401 277 113 2988 362 406 14704 238 8076 4816 9970 57 17062 9597 386 4815 4840 17320 17666 328 488 159
1402 6332 3206 21390 10263
1403 7908 1176 6577 1247
1404 1534 2815 2902 1542 3490
1405 2782 2818 7130 2897 11384
1406 15092 7545 14201 13440 8614 8680 13442
1407 4812 4830 5945 5956 5934 15553 9645 10630 12322 4883 4885 8076 364 17074 51 4886 29544 15380 17068 26843 17666 328 12421 271 21943 21722 311
1408 26644 21374 36625 35115 29014 23406 34165
1409 1553 24373 1317 23296 37621
1410 13198 19432 19437 24671 23212 26322 25093 26091 19460 19438
1411 7136 23782 4179 16585 9342 20227 13123 1461 6452 6436 5785 15110 29458 11936 25469 20278 29174 4344 15822 10676 20565 25564 25363 15644 6416 15572 9387 4625 4654 2974 15591 7570 15621 6391 10667 29156 33700 10688 13227 20792 17924 22447 1555 4388 31025 6512 16440 27962 4517 25267 23764 22392 22419 2160 30171 6439 29413 8807 6103 11091 2678 33104 15659 32021 31157 35059 22100 6515 23548 30416 11491 9346 19127 30279 6562 35293
1412 12728 11927 8878 22064 640 2703 14048 1775 35233 12802
1413 4826 9599 15751 275 19105
1414 3208 21390 9307 18026 23030
1415 12556 13337 8452 628
1416 5717 2887 10836 7593 22180 9258 9117 13267 5320 14167 1685 7814 33189 7138 6944 26989 10233 18645 10331 3787 6916 7722 18083 8336 14615 24895 8554 6015 9193 3782 8594 27834
1417 35073 25392 28717 17940 33329 33998 24665
1418 12881 17288 6441 11512 24258 6507
1419 24676 35965 35194 17088 9755 35389
1420 2064 20227 17681 16246 7629
1421 13203 25397 20518 17958 17579 20515
1422 6534 30918 5520 11598 6456 9713 13490 8762 24089 7171 8538
1423 6133 6652 709 4711 6120
1424 6123 6717 8137 5231 2782
1425 15344 11660 2533 24376 9838 1038 2705 35083 14807 6543 11961 31688 17181 15634
1426 16996 19113 25845 3928 21287
1427 31961 11342 28752 5884 636 6336 18909
1428 15796 28725 1496 35527 33056 11661
1429 737 4859 2791 2784 655 2748 10298 21393 17251 18379 783
1430 81 788 8037 10114 5497 21624
1431 1253 8404 24034 3294 8866 26932 1850 8894 1661 13759 7570 9026 2428 7416 4327 1988 2366 16419 2527 2482 10135 29476 2541 1474 8933 4662 26198 2580 23187 11241 9780 34105
1432 23760 6395 31835 26793 6473 20039 2401
1433 3032 15388 5929 30225 326
1434 17406 11085 9469 4477 14994 2914 4634 5518 8717 4707 7888 9208
1435 1318 10560 11314 30471 1998 2583
1436 11495 18003 904 24328 7203 7490 2394 7502 12878 1134 27001 24754 13734 1523 10899 8376 9822 26764 11547 15315 37749
1437 3537 2780 7982 10395 10794 4313 8064 1534 9624 2806 18174 8409
1438 24382 7562 35647 26006 33530 26576 9226
1439 13098 3223 9705 29171 1123 14983 21170 2256 12930 12151 4072 19208 2247 2372 11361 2436 12070 3294 2135 2602 2272 20219 11989 2373 21312 6506 9775 2481 10135 31847 5749 14821
1440 930 11164 852 3788 13026
1441 3584 656 75 7950 5350 655
1442 11672 5213 21167 5205
1443 6687 9702 4632 8763 5018 15 2706 20071 10319 2917 9789 2806 3048 7901 5473 22313 8867 17206
1444 19528 23412 4774 3189 3179 15199 16149
1445 12644 12767 12636 29341 31005
1446 7235 7239 1000 1826 653 760 15515 1024 786 20615 649 3426 9989
1447 907 35247 20220 905 1592 8830 10740 11660
1448 21981 12873 477 25553 17988 15038 443 19181 162 326 32099 24928 12441 4740 28679 32895
1449 21912 17935 21500 17484 21868 21481
1450 2199 8536 9386 8537 13218 9256
1451 7563 10628 8180 2394 1840 30920
1452 18672 9893 19866 3763 20241 33296 5235 17706 9171 23848 3083 14546 4929 16251 6753 29952 18667 29053 8402 4280 30926 14541 35623 9578 10487 28848 10436 7546 814 28005 20815 19606 2861 19722 8679 18669 4081 4791 18786 31150 31842 14570 3583 6744 14396 30353 12905 35391 19701 9148 20435 20438 35976 13040 37759 30464 31188 3670 6033 9981 5175 8287 25857 19864 6053 21468 14653 37358 34504 9164 8691 7335
1453 6841 1509 1109 10352 10145 5486 1587 7469 660 2222 1157 5617 1612 5228 5628 4283 7784 4892 2822 1902 4435 4893 1170 1992 3171 16878 3148 26277 9641 1256 18500 35488
1454 5480 1124 1597 6421 17290 24326
1455 13 2728 1682 762 4331
1456 17546 8769 13130 20411 6531 30373
1457 27997 9431 2099 2328 7554 2278 9463 5511 1212 12370 7469 5743 8942 1138 26658 32228 5528 22529 4300 19215 22665 8557 1992 2916 9769
1458 1190 1982 4458 13071 1824 1428 1051
1459 15612 17132 4680 567 619 836
1460 2299 2318 2065 2535 1870 2163 23129 2084 2300 4137 32336
1461 2775 2715 2851 5340 2968
1462 26556 11525 6044 783 18653 2791 22074
1463 26656 31840 18654 17223 8850 22740 30366 4868 24136 32174 15256 1970 2533 2365 5477 7065 9828 12056 17245 33704 4661 35522 28328 18310 26445 8074 15937
1464 13812 1829 4524 3362 20685
1465 9506 11892 79 32409 3784
1466 20792 4446 15256 15822 1482 7417 1102 1737 6465 26656
1467 1523 7151 16935 1524 4879 23293 1264 12328 1038 2566
1468 3077 9171 35736 697 8681 12911 10105 19273 14646 33086 3639 17121 9290 31701 29650 14203 16226 7227 29353 22095 33264 35566 4964 9366 13790 826 32692 19233 21699 19717 844 3567 36490 35159 35357 35755
1469 1097 6841 10949 17421 6606 10318 37461 5104 30876
1470 1891 918 10561 12023
1471 799 2141 15640 6320 15667 15660 18953
1472 887 3856 6325 883 10890 84 4990 82 811
1473 7558 2584 8891 4270 2093 7822 1149 2484 1226 26156
1474 29066 7915 5023 3791 24453 24864 15458 2175 20745 33068 35692 29985
1475 18818 9058 17505 30869 9078 9073
1476 34141 22565 24723 28389 35613 37117 21121 27618 24247 16266 35307 18937 28579 27759 23729 6320 26237 26194 3851 27482 34046
1477 18323 17800 9609 26821 15818
1478 2643 92 8020 4314 2012 4331 3130 10890 783 82 8454 3128 8408 15
1479 3245 5053 2109 2260 2445 9564 5018
1480 8445 1738 18253 1749 1355
1481 1020 18800 34827 18384 18373 9058
1482 8257 1468 1250 4488 2822 1046 2050 8963 1457
1483 7435 27976 3804 18174 8752 26072 31911 11051 2015
1484 16828 16778 16313 23955 20724 3901
1485 8692 35207 19709 6155 9989
1486 4483 922 1143 8741 1249 4158 904 4377
1487 3091 10027 586 1267 18848 31930 588 12195 12098 19034 10009 12176 10294 23997 8058 17052 29512 25266
1488 17274 10283 1057 2702 9709 1089 1056 9789 18491 25787 18990 19265 22493 25998 21553 18511 16241 19512 13698 3842 5249 776 2637 11124 26729 26455 3426 36580
1489 8077 5062 2849 3654 25000 6753 3613
1490 28842 16767 14514 7358 7379 16778 3940
1491 4280 30786 7426 13025 28432 14185 806 13031 13273 11636 13026 35842 9501 30520 17633 30242 739 8756 36004 21410 2889 22144 8277 8668 21745 9566 3621
1492 5284 1244 9067 845 855 685 11051 11111 26199
1493 15211 26125 23218 23216 31488 24065 25637 26992 17347 17494 25388 26343 19409 21570 15212
1494 15249 11566 20544 8150 5809 10100 7389 7012
1495 3313 4979 7545 626 14016 1351 3433 636 14236 34883 24310 5885
1496 786 7409 1941 6811 96
1497 16278 21523 10699 19190 16781 16028 16601
1498 4850 6067 4687 5298 7532
1499 353 21456 31679 12129 21788 28620 15045
1500 6575 6576 4257 1257 31464 909 13745
1501 657 4497 710 16591 18755 2782 4330 743 709
1502 669 714 688 783 2709
1503 21630 11498 1053 2604 2705 17529
1504 6061 4921 1189 9710 1090
1505 2748 1019 15068 2815 28986
1506 1402 5108 4455 8649
1507 14598 1250 5826 2701 2670 13936 7504 15924 8349 1514 5774 1189 10133 2298 2617 14798 5825 7631 26158 14469 8885 23838
1508 16815 20789 18606 29706 20956 18737
1509 1120 4257 11532 1062 12344 5126 10712 4144 9471
1510 18046 1056 15679 15122 4528
1511 7490 8376 1071 1184 35377
1512 2782 2779 774 648 2787
1513 3482 4094 4981 2787 724
1514 34154 34159 22190 9301 22938 31902 7604
1515 4450 3268 799 7340 4347 1440 1239
1516 24973 24374 9809 6220 4339 9833 8586 909 11501 1518 8385 9209 33588 11628 26199 4359 5589
1517 313 22753 34640 28921 6354 10722 19829 6379 19966 20982 24744 27788 28366 6348 5763 13863 6301 14510 35273 28370 8521
1518 24487 19169 11457 3974 7373 23172 22840
1519 12860 24283 1718 9213 12830
1520 3381 2593 5599 2377 25669 12759 31975 5604 13094 1245 20235
1521 2491 14456 28438 8858 14637 8838 2284
1522 7984 769 7545 762 2787 22650 12679
1523 6058 22244 35297 796 28686 33775 35816 3621 21409 35541 13559 34904 9203 37985 36809
1524 10039 5294 9930 7533 6643
1525 4710 15274 1504 18133 4590 4331 11746 33424
1526 9126 10427 25116 8633 3801 3771 24893 796 3629 14667 34466 3600 28892 12896 5063 10508 21625 5339 22138 2015 10485 7438 28087 9286 2959 29638 15059
1527 12413 12658 205 401
1528 5869 3458 4126 8213 2686
1529 7469 1471 8189 2225 4255
1530 8120 936 3393 4049 4057
1531 12892 8324 21190 16448 8969 8654 34421 13506 2182 2905 6750 20787 2709 8321 3604 21865 19598 18975 8675 8334 3561 9193 17861 9312 2808 16920 22767 21207 23301 12164 9563 14202 8692 9557 10209 5024 8336 23936 3539 30703 3520 3516 5175 28334 4337 4544 19673 3812 37676 24937 14346 9221 19687 6668 6830 14919 7867 10367 31316 10241 12938 21405 3255 12015 9580 26319 9244 15441 19271 13021 22147 19722 3686 5386 33664 13684 30160 36364 33454 15468 22992 28405 35329 15454 9487 260 149 35720 31173 30424 35206 28967 20438 9279 31680
1532 5026 14560 4999 10432 32126 21751 3349 32139
1533 11082 7417 7501 9775 4335 7089 9813 31833 2172
1534 5063 3490 75 18388 3932 13013
1535 3600 2842 662 6027 772 2706 9502
1536 18915 14290 28025 15062 14296
1537 20599 2702 9779 2612 7697 11672 7699 1949
1538 9357 12934 13078 9831 25356 13900
1539 5484 13760 1956 20305 8763 25666 1818 8774 5214 25137
1540 14022 35431 639 27866 7688 31434 34988 8439 26245 22946 32281 14517
1541 3393 949 7270 20782
1542 14775 8776 24718 8774 25928 8763 20408 1447 29612
1543 22267 7722 28915 2783 4331 9987 34931 29955 5394 6142 25475 31712 37212 37137 31755
1544 18947 23111 3862 20942 32311 25722 32602 21296 19786 33826 13618 37197
1545 10952 12679 2783 24460 20510 13035 15479 10482
1546 16507 22828 19382 16053 16914 3928 10283 21286 18496 24930 4771
1547 1717 696 7890 2803 2706
1548 21087 31210 14059 13394 32977 14494 14043 1749 13989 14064 15879 15887 28208 13151 3330 3701 8106 9994 7835 10701 12743 22184 15885 3106 18693 23923 31407 31502 5433 15917 33726 15888 3998 3179 8505 14076 31768 14109 14017 23785 15889 28217 22354 5444 3115 18698 7850 31409 1282 31761 22922 19353 34607 15873 5427 3125 8889 32656 37271 22632 32662 8496 8875 1029 33942 887 32125 32737 14143 22634 8702 28770 8495 11790 36251 34182 8940 26858 14448 36319 26837 14039 643 22005 22938 11267 33014 8446 14021 32374 8452 34891 22625 37884 37822 10524 22940 35773 37152 37593 14087 22939
1549 1460 1382 9626 19176 12023
1550 20951 16515 16006 18863 15204 19786 21813 24526
1551 1532 7613 1530 8531
1552 15644 1502 24675 32184 30810
1553 7608 3768 1826 2765 783 12 7597 11649 14402 2706
1554 4332 2769 2800 7052 704
1555 1302 11889 14549 14124 35621 34976 15873 18704 14449 22453 15881 14097 22643 36837 5450 34758
1556 1145 11091 14420 1840 15662 8180 14999 1431
1557 2205 2101 1922 19998 1438 1471 2386
1558 5279 25361 6046 2015 17699 2905 12156 5319 3305 3787
1559 10634 1524 13734 4667 15338 16456 15304 11327 3830 1264 7827 13408 15168 13933 11325 12335 30472 1459 9838 11498 13744 2010 1066 6232 2822 25136 2342 24392
1560 2491 1257 1253 14821 2050 1057 10247 17299
1561 13087 24782 15979 23326 16848 12786 27129 16663 28114 27392 24789 17902 25062 3840 18559 20853 18499 20349
1562 1031 15900 1257 15263 7026 22426 36514
1563 22479 18195 20951 15984 3166 3852 24083 16170 22841 23735
1564 3584 2725 3055 4938
1565 2237 7017 9521 25485 4473 10787 11860 6072 901 19133 10594 3379 7084 904 9345 30718 915 1330 2103 6504
1566 10633 6450 19218 28458 4168 7460 12878 25924 9793 8196 31849 3425 9831 3729
1567 824 1853 827 8 802
1568 28005 20573 17143 37659
1569 20296 29026 24769 30561 35492 23800 37056 5033 23013 16149 16150 34031 5032 23904 36413 29025 15190
1570 7501 11335 4663 9360 6433 32364 11518 6501 1898 924 15651 3379 6187 33891 15742 31688
1571 1762 8504 22358 34702 3099 13327 14038 17840 14495 1303 14133 20646 31967 6366 645 20652 14127 10722 624 15866
1572 1247 2096 4404 4375 12581 902 1204 7121 16277 1948 6681 10591 7991 7176 24678 21486 10566
1573 1031 4441 8717 11563 797
1574 13093 898 36985 1538
1575 17908 30863 33300 26971 16657 28803 23219 24858 26970 29281 35330 28251 25077 36614 22952 18883 32938 35871 20349 26485 24087 22310 23471 18183 31094 24796 16320 21281 20838 33903 28393 2693 18601 28729 27711 27530
1576 23451 11976 11980 17290 13934 31590 21312 13832 10900
1577 3605 1540 2835 852 6651 5063 3635 5652 2878
1578 15184 22603 12306 1187 6666 6 10787 5818 12151
1579 4244 4866 5175 1548 16
1580 3858 18874 17905 3170 3195 16546 3996 6320 16868 3980 23932 16709 16723 16661 18747 16017 19004 15959 16272 16740 14275 18723 19121 20760 7374 872 16887 16656 16888 16302 18329 16533 24818 16257 879 27501 17816 16877 16186 16867 18940 15967 3992 15996 34003 29536
1581 4653 24129 10900 4639 7490 87 2279 7491
1582 23145 9797 1619 2342 4375 7626
1583 4486 5215 5198 13054 2523
1584 23588 16264 32733 2694 16646 24495 3164 24487 16188 17506 20211 24219 16303 18519 16992 22479 20856 15998 16122 20913 3998 4775 16087 30356 23160 15821 25846 16076 16010 20917 21670 29097 25981 27349 29781 23978 29835 30445
1585 783 764 1025 2718 1716
1586 8360 22038 9419 1913 10588 1104 1962 2531 35579 14466 23191
1587 8720 36387 23836 1164 2389 14736 35126
1588 1255 1597 10784 9758 901 2699 1240 8959 1335 8267 8261 696 4094 845 2822 1046 1142 6922 1058 1576 9744 1034 2043 5228
1589 7498 906 2386 2633 2437
1590 1481 6465 7506 9740 25934 12336 3413 13740 5319 2304 12645 1317 927 1146
1591 24795 32144 29237 18013 3918 19880 20524
1592 7409 13437 2878 5035 2866 8551 17177 12545 5721 2900 18982 90 2951 28598 6648 2948 6811 13440 20063 5677 11059 4304 5498 2852 5501 5285 18504 811 3608 8527 19957 1826 696 784 3569 3076 88 12164 3132 4079 17971 11033 7323 5002 2895 6035 23938 8631 5723 14825 7546 3323 6278 13239 19959 7314 2176 3621 33605 2869 4949 5861 19628
1593 6999 2041 14737 5808 16370
1594 4867 3829 1661 18054 6443 17606 10089 14978 13378 96 16217 17182 8887 3336 4633 6249 2027 25243 4182 6241 15180 23282 10713 3372 4555 2511 26151 2359 7518 15797 3294 4606 4524 14749 2032 1939 30165 32995
1595 13189 69 4863 6652 3489 2706
1596 11488 1513 905 25418 927 9761 918 31994 3383 21170 4123 7473 7506 37992 5806
1597 7456 1179 13892 4707 34957
1598 34461 37437 13040 36733 2855 33696 30746 33296 14654 845
1599 1831 5630 6267 1065 11278 18506 7298 1119 1810 6096 7299 7389 8489 1803 2700 6245 1216 6678 6259 2093
1600 34756 3123 21251 13983 8495 19341 1772 19342 32656 1285 13970 31411 35904 22627 12796 29192 18224 18215 14266 35015 22938 36256 14121 18254 35773 34987 5404
1601 1145 1855 1319 1916 1377 1496 13301 3542
1602 7373 17898 20722 24526 21284 16063 24496 13518 15815 10282 7328 23932 16071 17276 5026
1603 18523 16236 878 16670 3186 16813 7327 19170 18719 3893 27233 16648 20802 16835 24081 16023 17882 16635 18332 14284 4774 16074 16485 3316 17438 3146 10207 16197 25212
1604 774 1549 696 3678 1532 1025
1605 28319 15203 16672 16741 16691 16723 16562 16080 4793 23042 16086 18527 16509 14527 16117 16550 14489 862 17736 18533 3927 3432 16557 16855 18347 3164
1606 2781 9128 9117 17742 807 3629 3069 13026 2791 701 10609 15 25479 3502 7248 5025 12978 11036 29268 4502 32451 13276 16248 8645 3600 8329 15474 18786 7811 8692 676 1017 2787 23492 3312 4316 25255 13 1067 1588 7762 9365 3137 24449 16623 12641 4925 10750 3555 15508 36401 2819 9120 3284
1607 9702 1056 10628 2602 7695 5759 1134 30986 7752 12574
1608 8314 11417 20574 24288 6764
1609 9343 5482 1631 8376 37881
1610 4334 8262 7032 6579 16935 17164 5094 4376 1431 4450 14650 8832
1611 1792 7737 1790 14498 35167
1612 10431 22135 13791 25483 22289 14832 9364 12984 8966 2944
1613 5927 4806 145 8025 164 8028
1614 3245 18114 7392 1717 33253 21412 9611 33558 10952 0 17160 7259 26743 19983 8874 7604 2783 9989 5020 695 1541 4859 2637 3483 7262 9501 2706 3811 3651
1615 87 2902 2897 2929 2718 771 13683 1025 10159
1616 3312 3647 2964 8412 12825 7956 12679 2748 13035 12017 25104 21461 868 6121 33559
1617 2528 15325 32701 23554
1618 25155 26341 36222 31414 26000 33626 33280 3879 25891 16492 20189 35563 37227 37337 35664 37988 9058 37333 26582 10299 23810
1619 4966 15163 3429 2806 2769 10482 15479 9279 773 5381
1620 17546 1896 5100 11666 4283 8856 13223 1161 6081 6215 9380
1621 2014 12312 13449 2602 1039
1622 12202 832 29355 984 13958 837
1623 1682 676 1853 7259
1624 2706 3245 3248 1529 1531 3259 10395
1625 8846 25554 4190 31141 16585 37685 30843
1626 20843 7371 23932 4792 10283 15986 3872
1627 7002 7047 5784 2461 10251 24348 1102
1628 13 13863 25267 32372
1629 2964 7130 2742 7658 3490
1630 7613 3245 25105 6653 27024 2791 19709 1826 15630 93 14318 768 701 87 19269 9501
1631 16723 16266 16894 16694 16278 17878 16000 3999 18549 20004 16336 14489 16280 16895 16682 23021 18540 3928
1632 8205 1136 6197 1152 3301
1633 33 2782 696 24903 25269 16147 28209
1634 4602 1097 4219 1140 8779
1635 5506 6063 34021 6916 10409 8320 18093 6750 5050 12119 23500 5175 7432 3506 19691 5868 26653 3634 31149
1636 3853 882 24200 16857 16562 16958 16559 16264 11454 23174 16855 16026 16515 18869 24088 16853 16823 16970 3174 16305
1637 12259 19180 26691 12576 7 257
1638 12220 5884 5894 9299 8165 10001 748 9294 10722
1639 32168 3316 10987 23370 19172 18738 29761 23348 16845 20837 16047 16645 11457 16241 26196 3999 18815 13707 17758 16151 18805 23969 19265 20951 5249 9058 6143 32257
1640 33243 6639 619 34211 10291
1641 12848 10513 5428 1794 22346 22344
1642 9576 10432 4927 13574 3661 18058 12536 5069 13668 5024 8692 25007 36390 14205 11397 9561 34912 10805 795 5674 19448 2844 13590 8690 13446 19579 4501 6063 32928 10508 10442 8683 19720 6034 695 14342 33910 16618 28538 9577 9985 10497 770 12635 14377 9557 10459 34742 9988 13031 2706
1643 4996 7722 654 868 2755 2784 12 15068
1644 7550 14779 920 2445 4189 1798 6614 6534 7967 1253 1915
1645 23126 1597 11622 1509
1646 28731 18457 33502 20970 32257 32881 28694 35224 18014 16631 29781 29321 28823 3885 18555 35216 27578 35781 36850
1647 16910 3918 3179 16475 19116 20897 32734 16762
1648 5053 8279 8327 12628 3618 10428 36483 3621 9261 6718 5680 9564 8755 8438 9891 10420 30614 14830 10485 28900 34421 21254 11049 22774 29122 21141 13576
1649 22085 34207 36488 26825 32428 5164 9947 8009 29523 619 22081 9958 3091 4697 12103 27877 37113 13005 836 12977 555 4699 8055 8045 27992 9928 20429 36720 10011 29515 8061 29512 27990 25360 35771
1650 2751 19642 3539 11379 4301 18081 2731
1651 6877 786 31823 15521 20467 3536 7809 2015 14391 1848 4497 10367 783 22765 19019 19605 9584 9214 18969
1652 34081 21080 28193 1306 27786
1653 30961 3355 33516 34236
1654 1227 1567 11630 3706 13299 12341 6534 7514 1923 11503 10883
1655 21413 4788 26193 15974 36128
1656 621 12193 7528 1668 577 834 4673 558 10028 6066
1657 10020 4688 15855 1796 15875 1786
1658 10005 9800 23122 4634 30591
1659 9474 4274 7815 7652 7357
1660 24027 28614 33907 303 16233 8131 13108 19922 21453 17081 24051 17080 36523 28861 1496 36780 12595
1661 902 23556 2224 2174 3702 2584
1662 16691 16550 16503 18809 9641 862 16188 15206 16492 4784 16970 18004 16515 18723 20110 16846
1663 12143 34957 19944 4348 25325
1664 772 19668 4904 762 4274 20726 9268 1015 30065 8665
1665 3649 12783 3243 17995 1492 11547 8807 12860 2082 2081 1406 20277 8832 19209 6214 9004 8734 4555 15685 7111 15659 22386 12645 32329 6531 2541 1257 6500 851 3735 6503 710 5607 27005 25136 17245 11543 15315 2523 31264 13905 15642 33771 6655 3248 11742 32467 20321 1087 4664 88 13288 15674 16221 8399 19798 3831 15667 35193 24755 23140 24370 30294 21261 9208 4483 2052 8830 821 19697 21153 19847 4661 17922 13582 5323 4122 13857 37514 1442 24379 11959 21688 2219 4471 11961 35152 6550 892 5518
1666 23330 18937 17955 19189 20517 23133 3157 2695 30734 23967 20943
1667 15128 4261 6381 784 1094 7071 5100 1616 7115 7061 6841 13858 3743 10902 7570 27821 2079 12372 13822 35670 1948
1668 1053 26655 1256 7035 1317 4102 2683 783 22198 4939 20399 852
1669 231 425 9595 9605 17074 21728 5965 466 21797 28398 29544
1670 31331 32769 11124 13087 27850 21421 34175
1671 1404 904 10351 4032 10365 6206 12127 5752 1015 15810 20018 6468 6516
1672 737 760 695 2734 845 3045
1673 11023 1250 9690 1902 1046 23558 15245 9730
1674 6175 8841 23139 1035 8860 2541
1675 20825 7846 6366 11162 3206
1676 23130 1478 2535 17673 1471 11990 2948 2906 30106 32336 35309 2602 799 33257 26214 35824 1031 2564 1696 7560 19540 1925 14785 35152 29790 36479 14757 24379 30077 2526 1515 24454 15486 2583 26153 2379 35441 33547 18116 24332 36218 31524 21688 1814 6497 24035 31043 9883 7449 37722 14468 13838
1677 8672 762 715 9241
1678 1273 8054 3468 557 4681 596
1679 1049 660 5465 8959 10208
1680 11327 30165 20322 2070 1922 34231 7302 5782 26206 13056 5090 1089 2143 7250 10336 2462 9057 34568 5812 20049 30106 25866 13799 7765 12396 7635 11276 2083 10771 25970 5215 12074 36886 17185 31127 30682 2580 1164 7135 34527 30986 1874 11868 9631 6636 1196 6487 37751 25138 37096
1681 4327 1388 12344 1646 10094
1682 2813 683 1445 3510 4233 7422 2013 4498 6716 3491 773 8628 6198 68 981 3133
1683 32579 36091 24464 8303 5343 30463 29447 14438
1684 28563 28193 25437 23708 8114 37190 30025 12231 19071 28778 9042 33956
1685 25065 21411 29170 13521 16864 26455 27259 20690 26462 29260
1686 5450 1346 14875 23420 26247
1687 4936 2779 5063 5020 5378
1688 4039 4984 8135 8136 951 28857 3410
1689 9989 9578 8433 22449 34503
1690 799 1484 1031 13732 1322 9725 6701 928
1691 88 6715 8757 3083 7956 14453 20465 9980 5387 9574 9153 6198 23040 1003 5380 1709
1692 20062 31566 3720 6180 6204 7192 11885 8733 1419 12581 1983 13731 4103 1084 21593 2376 30598 4481 3747 2479 6696 4205
1693 1257 11973 12404 5465 25811 10134 3839 1438 9459 6606 13477 17240 17503 14730 2365
1694 11745 1026 5225 6447 8795 7908
1695 18882 13087 18331 19166 11691 20080
1696 2774 10816 4860 10108 7746 3488 8392 3518 11060 3564 3061 3650 15 6895 9221 9574 33671 9195 693 3679 3636 22282
1697 14548 10724 13327 2703 11785 14070
1698 93 2811 15 794 16377 3553 2806
1699 3219 13921 7254 8484 14785
1700 13478 2715 762 9545 8825 4412 2227 897 12029 5214 10136
1701 8106 18021 13341 6335 22941 3096
1702 6354 18676 13364 6374 15766 14122 11696 8094 12241 12228 7858 22185 25535 5894 28921 6356
1703 1480 1471 4190 8195 4468 10624 3831 4207 1455 11946 8803 7485
1704 2959 4223 6111 1423 23567 11884 33104 9028 20452 31283 22675 2279 5117 1449 2499 12880 14664 2262 1315 19141 4257
1705 5429 22350 14089 1774 633
1706 14090 28212 5419 25371 26851 35620 31768 36411 14091 14269 18421 626 15888 13150 15484 10531 15909 31433 17431 8504 31404 30796 14080 14110 5437 5434 14494 18269 5445 5440 26244 31621 13145 25522 34756
1707 2725 1537 3422 817 9490 5685
1708 8710 4648 10321 15826 8079 24325 6636
1709 7119 8778 2192 5484 1053 9789 2701 2078 8764 8369 13128 1457 1895 7489 8813 1244 34497 15265 8822 24345 4387 19224 13143
1710 17593 19080 30959 32065 32569 19429
1711 32538 3068 760 696 656 73 676 26584 15062
1712 29680 34181 29602 36284 19364 656 10507 15516 4991 8436 34239 36626 29818 30968 2772 37423 10510 37830 36796 13198 33440 7643 8428 24458 9799 21492 34639 30242 2399 15458 25945 37652 37831 26540 33620 23275 19367 23246 33441 36283 37323 23214 35445 29376 32594 25046 26121 17485 38008 33515 34054 25047
1713 9863 1642 1455 4076 4488 2093 1332 927 6239 2736
1714 6826 6123 4994 811 9584
1715 7659 3259 1538 0 75 10063 27871
1716 2748 9559 2792 2754 668 2724 4301
1717 25998 18993 21279 18012 18986 25279 7262 15613 17012 25853 23631 28835 33368 29170 29835 34292 35216 33876 28308 14988 33854 34023 35880 19266 32236 15991 35737 16357 37821 37221 32880 16101 36231 20914 35462
1718 4936 15 21909 787 777 2796
1719 32241 13120 8845 20552 9800 15278 35905
1720 33818 31524 14823 5743 2316 11982 9431
1721 27558 26848 30468 28307 11107 16861 15614 36025
1722 1025 8680 15509 3242 1718 3305
1723 2461 7774 13943 4181
1724 649 710 8399 2754 7604 25146 768 9551
1725 7159 1404 1971 8722 10871 27235 27341 29855 24794 3276
1726 4339 1104 11738 9238 4387 7198 15737 5638 7038 4562 904 9209 24223 12338 16985 21866
1727 2781 2706 769 2754
1728 924 2185 2026 23614 11517 15841
1729 6694 18655 4139 33972 8205 9614
1730 8260 1385 4172 917 9026
1731 2787 79 83 8697 10052 8399 842 5340 4963 7357 5685 693 2754 649 710 715 7604
1732 8004 5290 20626 9964 2756 3479 2957 617 5365 36155
1733 14302 5833 7822 2410 11503 1256
1734 1057 7450 914 9020 18853 5542 4327 2025 7827 1321 1244 1257 1438 2166 8914 31314 19312 1497 1513
1735 14415 33572 2798 13579 4860 10482 7426 10452 5181 6134 7282 30065 3629 4236 24449 3556 13585 8320 32541 26310 5002 4500 14421 9285 31839 14651 14195 6014 14435 10484 10466 31152 12545 23950 10470 19864 798 14428 23920 4094 30425 24450 6907 3312 14955 33086 36539 27976 14432 8296 15508 27803 8757 21193 5869 4590 36040 6906 14427 17861 36423 10460 11052 8693 33461 8753 28057 4576 8287 21187 4978 8704 8583 21348 15446 14430 28963 15436 7054 12778 6200 10492 29676 10503 14431 25146 25596 32903 722 28913 14374 25613 24062 14959 14433 17055 10377 29278 32456 81 800 867 3628 28720 30926 24451 7545 3698 22781 13282 17638 34904 5685 35754 35623 2873 35354 10510 29001 24061 12910 3239 17143 4936 2860 4796 14570 6866 6027 5396 26572 5210 24460 4911 27890 34107 2963 16622 3510 22129 23848 2709 7815 26371 9569 35944 5339 26789 28949 35666 28848 5323 31151 32434 35850 2958 20400 31148 12015 27944 4303 24937 37265 14394 21407 300 3817 37368 10494 22210 21623 29053 1707 5357 17919 28891 10398 34672 3127 34381 17914 11893 8333 25034 21409 4380 3502 24579 28966 22991 26836 14922 31705 31150 10425 657 0 8601 5326 26382 23686 34913 7879 27969 5284 17707 20435 14946 3577 31838 36958 32042 15058 26790 25008 34503 13038 33559 14546 30210 29054 36490 34424 24464 35755 36948 14454 18674 6151 1534 31149 4589 13769 33562 31713 11050 32989 765 2770 8988 37943 3318 5716 32633 25945 26375 4293 35842 18786 34929 8966 19024 10210 36096 14656 26016 37120 18624 38043 24561 32140 13372 25857 9989 9542 37834 35532 32435 7880 14523 22449 22989 2734 5698 35949 29650 8278 15461 9235 6928 4981 17709 28881 9277 13041 26012 9051 4502 2017 4301 2867
1736 852 774 19515 17303 4700 36110 5249 20932 16687 11220 3928 16269 3158 34292 23264 4777 23599 19950
1737 3126 11775 1770 1765
1738 8726 2484 12995 1176 4555
1739 23336 674 1446 5361 12978 12859
1740 9019 27955 20790 14766 17676 33370 9823 13078 15103 9796 5635 24368 8824 7086 30376 8378
1741 4497 783 1546 2796 2944
1742 15486 9454 14815 35837 33548 11980
1743 2638 657 688 29825 2726 10796 1709 3430
1744 3752 1057 2682 2916 1129 7254
1745 2787 694 776 2754 11290
1746 24875 656 783 12330 8622
1747 6877 15 6649 690 2714 10370 12543 87 10218
1748 30286 36120 32561 22958 23072 3910 25990 33645 36688 887 37846 35416 3868 19949 37683 25992 37391 22252
1749 5319 7261 773 9266 9501 7428
1750 2137 7297 5008 4398 1476 4032 12121 1922 5110 9738 13889 5762 7296 8198 3378 7496 30897 7827 11916 12581 20491 2686 4642 22603 1036 14466 2050 1244 19143 7486 12590 8265 10591 1412 3380 1509 1176 2269 1485 2052 1497 2559 906 901
1751 9016 1449 7919 7991 26419 2679 8743
1752 88 4963 5491 16361 867 24741
1753 12143 7897 5137 904 37527 19277 35309 12880 4402 26005 16218 1156 22595 4169 37686 7627 4449
1754 20730 8540 2034 9226 5826 29036 17401 9386 17054 20666 7506 7627 13094 1156 22243 8192
1755 5955 5963 12422 20633 21876 26695 28615
1756 1716 824 11 4309 1853
1757 3512 4164 6152 3248 4505 3600
1758 2008 4270 1922 1931 3385 33702 6404
1759 8167 10205 8094 7859 6366 18282 13636 15784 6356 9998 25442 15773 13363 5030
1760 659 1144 1425 7001 1979 1509 1249 9904 1240 3638 6765 1651 1190 11788 37845
1761 6187 1663 10059 10979 13951 4372 10251
1762 1534 4955 18619 79 24450 35337 2803 3502 12118 37448 28915 32140 21409 17912 33169 22152 6774
1763 8351 2116 11879 11986 7126 1816 710 1968 1496 2009 28052 26197 3372
1764 6490 7509 6417 1472 32388
1765 12641 3074 33692 19448 37715
1766 4426 1478 4191 10130 22674 15741 14420 7096 31841 13744 6481 34876 36952 25329
1767 3764 2787 8282 4927 13646
1768 20256 20290 29538 34127 29296 30434 27696
1769 8885 20446 26933 19858 6235 13185 1986 23187 1196 8466 24755 6531 37413 22038 14774 28178 15324 27892 2224
1770 2748 9285 3553 657 4087
1771 10321 2548 1044 5068 2897 2784 36641 2819 2830 29813 783 15476
1772 30921 26151 2132 30986 2500 12357 26173
1773 37829 28693 8692 5012 847 14375 12163 33088
1774 313 17023 19 434 401 5987 311 150
1775 7884 717 27251 11114 23019 7371
1776 1397 1440 4455 11501 1402
1777 7555 1658 4144 1152 904 22978 6225 9751 1333 2206 8946 7494 12079 1248 1482 7822 1475 6185 1467 1394 1483 15305 10627 10645 1033
1778 2806 783 1025 23523 36757
1779 25953 17076 14697 5554 32996 17319 31253 7724
1780 5883 6366 5879 6593 10152 744 2651 14236 5886 14605 7855
1781 13036 9139 28963 5341 10913 1852 35171 27747 2904 7428
1782 4595 21449 15725 9969 29543 457
1783 4711 33108 6716 9501 19709
1784 33188 14096 13992 14094 15904 15488 15906 31768 1775 14073 15871
1785 11983 26177 4665 13094 2663 15489 20529 799 6481 6620 14592
1786 27459 16746 14543 35916 9067 1003 31885 20240
1787 3594 11637 24994 1992 10436
1788 1542 868 16979 814 765
1789 8190 8778 20281 9525 23125 15668 25758 1068
1790 1935 15457 15481 33676
1791 785 2803 2753 3309 15
1792 8668 5024 30063 8676 3312 14412 3325 772 14319 10464 31442 11056 2804 12825 24036 16606 15513 5026 5176 15418 34253 34187 11403 22271 11636 36503
1793 3495 6902 1941 12887 4963 3788 7434 716 2809 13270 8697
1794 10277 16523 37102 13923 18706 14307
1795 4836 18 12663 36007 452 14899
1796 17357 25834 23872 23278 37423 19437 33516
1797 2705 4522 10900 2219 25134 31115 1218 13412
1798 7560 2415 7901 1256 1098 2090
1799 11 18679 2168 19531 786 9227 12577
1800 2851 2966 2823 8665 2809 8334 3253 5024 6036 1015 2808 2782 6653 796 8669 2781 3817 3309 2842 3778 2904 16386 12827
1801 1696 9503 5667 2902 3245
1802 5664 11705 6671 4711 9986 30911
1803 18177 21613 16091 21286 25518
1804 7538 12724 14715 10023 8162 589
1805 1810 17413 1176 4179 1413 7990 1104 18052 29153 11093
1806 1204 36146 13842 1696 8900
1807 28130 4392 16461 6249 24276 2216 2618 19863 16449 10350 2050 1904 33700 14637 23150 1487 1110 7570 10317 480 29554 33000 6392 4214 1642 6516 459 33657 6468 21684 10364 7506 1053 26841 26793 1553 24282 6395 4257 4654 3229 32018 10649 6432 31310 6484 32024 30891 37312 31285 7560 12503 15684 1256 32016 6489 4867 26113 5585 31312 799 25235
1808 4515 2166 1489 35012 8558 34498 14732 8274 7179 8477 6244 3236 20529 1198 11718 16751 9449 29171 1098 1472 12580 4879 13940 2036 15747 7760 25018 3383 2204 2360 1515 3294 15490 7404 5096 18319
1809 10268 10890 1717 4711 8436 4505 3497
1810 4374 5494 2179 10423 5913 18161 5233 11074 2835 30167 6135 3788 31626 10464 9583 25590
1811 20480 2602 32437 28037 20499
1812 8917 15843 13817 19855 1702 2224 11027 11333 9432
1813 14048 5434 3701 813 709
1814 4685 3121 22745 2806 737
1815 1153 4138 30294 4667 2334 11329 15643 1515 11925 15834 32193 9616 14050 14268 14127 37053 14091 14084 26421 36319 32380 34186 36251 11765 37515 10985
1816 16282 19502 30017 19187 15958 18948 18956 7371 29252 3920 10571 18039 23348 19506 16238 24762 30005 20692 16741 17000 27918 18289 23347 13087 16100 22566 26951 16825 20347 19284 13531 11449 20858 13493 28318 16016 24543 11454 23705 18865 9326
1817 28870 10505 10500 24863 9893 9979 17145
1818 11095 14313 15100 13 6687 11440 28681
1819 31199 2604 2172 5197 4396 6431 26920 5362 1948 1165 7490 21170 6387 13094 1077 22423 1102 13905 10132 10328 13095 17650 7159 14766 17673 9674 8820 8835 5485 9769 1246 6168 1896 8826 25450 10950 26111 25463 17680 30374 30178 33617
1820 9016 1330 4555 1847 7298 11609 9747 2700 7111 10591 8270 2255 2225 1111 36477 1426 15292 2050 24089 24920 13834 4423 6308 26486 6306
1821 1983 1049 13094 929 1134 20075
1822 2017 2637 5800 3487 2812 2814 3129 1549 1003 93 2638
1823 2809 12688 30463 16621 6015 22679 13018 34673
1824 9803 1242 8818 900 1556 13760 2702 9832 1129 9789 20181 12878 2064 26229 5227 14766 7135 8376
1825 30534 24538 22539 29585 26475
1826 1329 1319 6609 7827 2118
1827 1250 4548 2106 13411 2482
1828 774 2012 852 1626 3600
1829 12 4301 3258 657 6675 4557 3352 3245 1025
1830 3130 3568 7877 3045 2904 4330
1831 7199 12717 8845 33616 11954 905 24326 1385 16388 5516 8828 1240 9871
1832 3567 2897 2184 2835 3756 3763 5234 7313 10107 3563 11379 28280 25609 21199 15472
1833 2033 1111 1114 9818 6433 31428 4669 7339 10637
1834 27229 27299 25842 25879 16717
1835 2624 3376 1612 21688 23192 9797 2228 1038 7752 14420 5807 9452 12881 33601 36915 11874 3346
1836 10151 6596 8104 12228 34633 33097 8115 9878
1837 11585 4405 1056 2775 5091 1438 1427 1518 12520 13300 6583 1387 7403 9691 20432
1838 7722 771 3583 22133 8171 1546 7830 4294
1839 1011 13703 1029 23420 14876 23008 33626 3355 14296
1840 1682 20342 2170 2706 6732 1530 785 75 1529 80
1841 1463 16453 1875 15640 2322 4383 12370 1478 4197 13714 13713 4251 8079 905 8483 924 1823
1842 30639 14965 6731 5852 12331 722 9156
1843 6351 13352 21066 7210 7261 15414
1844 2244 1661 11583 1045 1442 12925 4102 11905 23912 23284 9822
1845 737 981 81 6653 2795
1846 2166 6214 1498 1031 8176 7986 1412 2342 9472 15643 7506 1496 16580 4653 26603 30277
1847 17416 16947 11598 10125 32738 29906
1848 2819 655 2791 760 1253
1849 18579 20678 3164 15986 20086 21667 20838 20087 15846
1850 3733 23607 1451 22674 12336 4707
1851 7501 1647 4453 31269 2705
1852 1240 1398 6922 9754 3825 1245 22995
1853 776 2023 5018 15 3259
1854 11919 9796 7631 13481 1586 4388 9751 7502
1855 20452 3451 7695 30783 3275 29142 2293 9420 1478 4298 9454 13311 2432
1856 1104 7204 2028 1455 1983 1429 15249 9028 1658 1506 7025 14977 11508 4182 1497 3702 2166 11505 13289 1515 1516
1857 6636 25244 11883 11329 34018
1858 608 4698 616 3395 8124 8049 8513 5315
1859 5271 80 1540 4657 2779
1860 3154 2695 15821 19190 20122 25891 16241 21277 27227 18499 20940 23105
1861 11985 25949 7566 22028 4149 26055 5821 5742 9431
1862 14419 9681 10133 7901 18539
1863 8649 34698 22762 24884 9180 8556 16364 13246 14433 34556 19716 7643 10377 13040 5351
1864 17384 11 7428 20399 9501
1865 13368 11176 5880 23031 30184 5904 18031 18704 25540 36200
1866 608 27828 9482 19053 16936 14096
1867 4443 11719 2079 9780 31611 5769 3358 9425 26240 23761 36334 31927 9459 12151 3359 1926 2624 7620 33601 37361 6216 15277 33989 2107 37315 12146
1868 3574 20748 36321 20241 5380
1869 2023 6270 2017 2724 2742 8649 5685 772 5147 785 19709 13683 31494
1870 18430 7123 5473 7903 1636
1871 1037 1489 2093 8763 1438 7151 1480 1971
1872 22950 5465 7846 13 15147 9822
1873 1893 8538 37115 10642 8376
1874 701 5868 5009 3636 12155 9218
1875 2632 6453 29887 6533 33159 11535 4608 5100 17383 3229 18308 34776 10751 11596 15494 6469 4392 6432
1876 16164 30767 31723 16076 19453 17780
1877 33220 13703 9713 23399 24113 7779
1878 32079 14769 2023 8074 37694 8861 21630 1236 14589 24676 28328 36845 3275 13138
1879 1937 8595 5012 2812 783 762
1880 10668 33000 13482 2224 6241 37247 1837
1881 1877 7822 4569 1250 2047 1075 12529
1882 29808 10572 32744 17369 19455
1883 18359 7399 8267 1509 9702 12127 10877 6086 8534 4369 6576 11532 1496 22329 3720 1110 4560 1318 13289 7506 5472 22394
1884 1381 1248 4234 15667 13890 7187 4871 29885
1885 13418 14949 6753 3678 1717 9562 5270 9574 4303 8706 3570 8658 9564 796 5177 13410 8752 23508 12119 23500 24985 5496 13610 15429 3803 10468 768 10466 13774 30886 10450 31788 5381 9286 8707 8412 31222 24559 25585 22169 30776 32434 32648
1886 89 20574 81 11806 9583
1887 2179 773 29168 3483 9989
1888 2189 2663 19943 3372 696 2043 13828 1438
1889 928 28680 13754 1804 1324 1661 4483 8074 11008 7024 28041 1898 14993 5621 4214 6443 4525 13485 4874 30985 11561 4172 11960 909 1317 12715 7135 7190 15646 9363 1524
1890 2627 6391 14998 6489 28177 6192 20274
1891 15952 20127 16169 21281 10283 14515 15932 17822 20902 3864 16771 24950
1892 13014 9986 2902 4504 5339 2179 30586 33329 33998
1893 21586 3984 34150 37585 34163 1009 22374 36690 29291
1894 10908 5298 4843 6066 4857 598 829 558 4682 1675
1895 7556 6366 24098 6356 13623 34771 751 8094 13340 24095 32804 20825 13349 38020
1896 18114 9195 3686 8672 810
1897 1934 6926 7453 800 2938
1898 14397 13666 5868 11290 12330
1899 4519 7042 5465 26328 31995 25346 2382 15331 7285 12930
1900 471 16232 51 142 233 114
1901 10 13905 1190 15321 1335 5577 20311 892 20235 17250 2579 1992 7901 13078 8836 20554 5637 2969 17341 659
1902 1156 2109 16019 7767 4557
1903 711 16251 17636 13273 30515 5665 33775 23946 37018 2709 33895 5147 3811 5345 6153 28896 30329
1904 21286 16761 27923 27223
1905 4483 4434 2466 4667 1322
1906 7528 22654 8010 35009 3090 12201
1907 1011 3932 7332 18864 17756 8703 7612
1908 2017 2014 737 3259 10600 5020 6667 19653 3426
1909 15685 24675 15327 13318 4359 1242
1910 4162 2020 6044 79
1911 3647 1015 2867 5012 2897
1912 15455 8412 35257 31145 11660
1913 1526 11017 6465 13304 14981 1663 1053 24321 1837 7995 1460 3379 22343 10132
1914 7261 11649 5381 786 791 3061 22287
1915 4257 13872 18587 25455 12869 15323 36092 2352 17659 20539 13407 19540 34366 1874
1916 12552 12240 3208 12229 751 24745 35295
1917 6944 34099 13669 7242 34104 29995 21307 35384 14964 34095 22550
1918 1318 1258 2109 1397 2523 22042 14974 9678 25355 9764 13292 11965 22433
1919 929 4016 4981 1090 5869 5477
1920 5641 6215 8537 6209 2333 19277 8802 8999 2196 15111 17421
1921 1857 2149 12994 7195 1886 2363
1922 1111 13429 1837 19536 23574
1923 22662 2469 17185 35178 2531 2352 35793 33973
1924 6382 1129 26928 1614 4522 12761 5452 12074 11983 17515 19540 13872 1971 18133
1925 685 88 688 1718 22048
1926 14812 2415 11983 26182 31907
1927 24352 1055 34564 34565 17681 15643 18132
1928 11442 496 26347 146 21708 17016 165 6013 19 33 311 257
1929 6133 15807 82 7425 688 6301 13634 15827
1930 13048 2009 5196 7405 12749 34806 2533 14467 36672 8769 1831 35983 22867 25172 6938 14577 12397 9436 9214 2232 1870 12077 12783 4510 1017 7873
1931 23466 15781 11182 25539 9998 9873 9620
1932 12899 811 22981 17861 24290 36574 3145 16711 34280 26808
1933 20511 2116 9477 1036 13176
1934 4301 786 13035 24347 2017 6659 710 771 9501
1935 2367 1810 12404 13000 20554
1936 4144 17580 19984 26672 25633
1937 32055 7328 4787 32185 17002
1938 2972 4876 1480 1455 9028 5529 1066 1492 20440
1939 10593 1862 12151 2623 13838 2411 13862 13926 35793 35791
1940 7298 2262 11237 7187 12881 5753 33548 24755 2238 5775 16419
1941 4364 12515 4268 1463 12370 4134 4218 10787 832 1415 1327 11846 1108 10643 10251 1513 19915
1942 16741 3170 21517 1250 799 3048 697
1943 16 8171 8433 4591 323 10630 14449
1944 2320 2568 11558 2067 10644 2526 9450 8742 1055 15842 2662 1386 13856 13183 1981 14733 7276 2533 29435 2558 35837
1945 9501 769 5024 737 9335 21745 19470 1532 22129 3784 3312
1946 711 3426 7425 8392 845 2773
1947 14041 14256 2043 18149 1786 11298 1775
1948 8332 2842 4963 7335 3259 2175 13277
1949 13137 1944 18158 1247 29589 8854 13316
1950 1534 1104 2686 12304 33883 11486 33414
1951 6430 912 13403 11327 1458 1657 2295 24754 18049 15679 1523 12388 7783 1460 3372 12149 6537 4425 3831 2529 2364 1071 26177 1385 28845
1952 786 1532 4900 797 8 88 1709
1953 29106 28847 31458 13274 4510 5054 3490 14174 15408 33662 36503 33665 9558 23848 16251 32457 29637 2869 36104 15056 37962 25331 6803 300 24460
1954 36631 35013 29792 24697 15050 5788 36479 22866 2585 17520
1955 4860 2014 81 6906 673 3245 4995 34257 93
1956 8560 10092 1864 1880 906 2144 1949 4453 10969 1388 26183 12998 37426
1957 24746 25210 15781 15832 23714 35551 13622 15786 8095 3214 23710 25538 20504 13617 8101 6348 6331
1958 10382 860 3259 783 11651 8626
1959 12 2877 2902 783 1003 3423
1960 22862 21138 33264 35171
1961 1439 29384 4127 33818 17341 1249 30834 15667 13760 8369
1962 12581 1245 6117 5758 4636 1109 8709 896 1521 12211 1473 1062
1963 17145 5308 37759 8679 9067 8707 37251 37659
1964 3312 769 5395 22129 8020 28908 12859 8693 23948 20510 773 11636 15058 2015 15479 15 13035 5323 5869 13441 2791 7545 30816 776 13372
1965 4488 2196 11711 892 1257 1087 1556 9747 1138 660 4339 2593 1067 2219 7098 4015 5465 2199 24335 6606
1966 35840 35660 15703 14174 26016 35585 33682
1967 8232 21625 1018 649 4503 2787 3778 16386 11663 1053 36762 29811 21624 2023 4500 12978
1968 3096 31407 7732 14091 11799 7673 11640 30822 10701 1282 12729 773 14109 17862 28212 3102 8500 800 26849 8495 31768 19307 35622 14559 15914 29998 33278 36319 14450
1969 6270 2782 3760 676 3284
1970 34425 1949 15944 13835 1496 5778 14755 2377 5377 9441 12026
1971 11311 25021 2224 15170 8895 37688 22423
1972 2877 5706 3647 6750 3768 6774 7652 7707 19833
1973 20108 23308 878 20349 27029 18734
1974 5024 6734 27798 12015 21237 35819
1975 8717 5092 6412 4654 660 13749 1238 1576 23771 1250 1240 8950 1967 1956 1062 8788 1506 6408 11883 5560 1612 919 8769 15723 10255 21558 5485 5484 2219 6942 4021 7460 10133 8775 16585 6456 14983 7468 21692 2304 7491 2173 7917 7765 30600 10900 11547 10680 10318 23136 9674 2365 13905 1474 35786 33657 25565 4456 8859 29683 2549 8822 28725 10250 8193 36528 24682 30366
1976 2122 1961 28434 20662
1977 10735 32723 18941 28729 15955 36035
1978 35157 17455 7873 29485 3678 18163
1979 1109 1057 11821 10591
1980 13725 25959 7488 7296 1168 1411
1981 18501 22040 35275 32701
1982 4304 8 5231 9134 4938 4790 3613 3683 704 5278 5493 8609 776 5234 786 4078 28609 7814 22999 2706 13595 14959 4007 14841 29165 23698 10 25526 33230 18807
1983 5147 3245 3488 9498 13189
1984 12034 1412 10657 1815 1385 1848 22885 9904 19794 5817 2191 7889 5488 1543 697 5087 5692 4707 7151 11876 1373 1618 10766 5530 5350 9414 5362 6971 4238 10647 11014 4164 772 25455 1887 4511 7357 13009 1711 81 11073 90
1985 23955 7366 20907 7371 14276 15932 23672
1986 11239 1454 5781 2281 2581
1987 16758 20873 17578 33165 10558 26049
1988 10790 11489 25185 19739 16444 14466 12306 37754 14469
1989 2714 1826 3768 2784 5504 2897
1990 773 3490 29260 1001 10752 9012 852 8669 12679 9989
1991 3149 36112 34359 32221 21243 31378 37405 13434 33206 32237
1992 16388 35802 7635 1271 6319 4772 1044 3744
1993 10385 4284 1015 3508 14954 8649 4293 704 7424 3496
1994 3649 3628 32187 12983 28090
1995 3601 10236 8328 8412 9110 9214 10464 18769 4999 8346 12636 10452 8668 6954 9200
1996 914 927 7196 925 924 35282 23555 11660
1997 8281 11649 5685 4310 852
1998 3655 1025 715 12 3248 5151 2744
1999 710 1541 784 768 6926 12119 3259 81 868 4499 770 1826 4166 9012 7832 1709 2858 21624 36090 860 16156 3292 13574 26815
2000 1010 22723 25528 17339 3352
2001 25320 8884 3839 2163 18051 10664
2002 21823 8673 32456 31825 17722 3803 34864 36621
2003 29360 17667 10979 15079
2004 7992 15667 1423 920 1037 35126 1053 2275
2005 13753 30295 17245 3265
2006 2916 4637 1797 1134 28754
2007 21545 23690 16773 25516 19477
2008 4488 8226 4186 18589
2009 19771 16204 15932 26526 3910 31346 7130 19767 23664 16034 17255 16711 30284 16725
2010 2326 5834 4514 10094 7263
2011 4062 34291 3410 4048 4063 4047 8135 34517 11369 8128
2012 3654 9583 12297 7239 10420
2013 20867 21156 14526 16135 16880 20918
2014 11327 11501 6103 26152 13485 7509 15644 1136 909 1898 4015 18654 1043 4191 8535 2365 15635 26660 8355 23882 4408 7488 18433 8824 4621 10642 3371 10666 9822 11056 6621 9800 17681 7501 4170 26847 1249 26095 34566 15677 16743
2015 1630 1114 785 2708 2687 660
2016 17325 14868 8871 15199 16563
2017 19581 776 2739 3242 12017 8750 860 4312 9501 5492
2018 1260 14884 15665 23280 25369 21690 15278 15311
2019 9825 13138 24321 6403 3703 13875
2020 1396 4707 5200 10949 12699 6525
2021 18427 1483 10774 1509 4331 23294 1646 4473
2022 12710 1473 11548 7191 5098 7570
2023 16114 12783 3584 29465
2024 6743 6790 12672 22212 5853 21341 5050 21602 3688 5865
2025 21158 19510 31354 27157 8083 27174 27392 8082 3158 34653 5377 322 7934 17354 25832 25993 19751
2026 8510 19551 15062 18739 20369 23963 24804 24806 15955 20951 16045 18987 7328 23960 16783 22718 16079 865 19951 20154 16173 26951 4007 21281 23019 22307 20179 19510 25512 26235 20118 16808 25518 22494 25293 14273
2027 6671 8669 10373 7261 9501 9892
2028 4657 824 710 1628 4732 15846 2690 866 16894 20921
2029 21806 32210 22800 39 3023 275 322 26045 15037 12453 34285 31570 34093
2030 11204 12218 748 17435 5885 930 676
2031 2050 8272 1661 13064 8923 4476 1904 1079 1138 5477 5537 901 6167 2008 1044 7161 1165 1631 6387 5837 7827 8963 1250 1380 8959 8382 8762 8355 8483 1109 2085 8267 4 5102 7699 10319 1176 1405 25648 11580
2032 16665 658 7725 10570 16827 17012 16902 18552 18340 24123 18934 16652 28315 17888 23332 16028 20120 23167 16794 16336 16974 23168 3145 21588 17897 16846 18540 18544 18541 17825 24117 23164 23021 25983 18515 13433 10986 16600 21660 18548 19746 16023 885 22455 16280 20935 16131 24311 15204 22536 24201 23438 24214 18203 19488 16901 19483 23169 24217 18809 21519 24120 18936 877 16730 16787 4765 16034 2698 16601 16637 18294 18708 13930 12281 17855
2033 16027 20168 32881 37335 34924 30391 13087 27036 19265 29182 26964 25985 28305 26456 32394 28841 16808 35469 32161 16308 18994 37619 35216 33735 32658 31386 16860 28104 35971 37107 37838 34025 28840 36134 18715 33783 36122
2034 10581 6376 24741 20825 21181 28421 21180 7847 10577 7556 9295 33956 6361 25429 32615 6287 11344 2661 35580 6380 6281 24747 13329 28549 24571 16400 34743 19069 21332 11177 11340 31923 32813 32811 11339 31659 27786 32805 32259 7841 25442 24748 31658 18032 28237 31871 5902 19820 24568 24744 6598 11155 11130 28545 6283 8517 15836 9296 26895 18027 9990 22184 8163 15009 30847 6367 7836 21639 32819 27779 32816 30678 2651 28917 31655 30038 32820 15758 23529 7845 19075 24100 14122 34547 31660 8109 32822 9993 24307 32810 20504 25444 36105 25252 9307 5030 20548 32823 11182
2035 7460 6636 12077 2141 29157 25348
2036 18194 20692 16851 3928 3870 16482 27298 25508 16241 9085 16093 2696 22828 23968 30970 27440 22325 26535
2037 1837 2026 2320 4435 9852
2038 13688 19710 10496 17611 9557 6927 716 36540 17638 28963 29354 7228 10500 13036 30464
2039 9705 15291 1959 7470 1478 6071 19315 13892
2040 5400 37799 25092 17229 7910 2496 2549 4225 18157 10874
2041 16780 16941 19261 17800 24577
2042 4484 12377 6236 6241 8919 12366 13794 1056 5468 9430 2584 8214 1189 1509 23386 16886
2043 15855 16748 2810 9595 24238
2044 7937 3346 930 1651 8881 2008
2045 3340 13794 8489 1887 8488
2046 33805 12278 7630 37367
2047 23150 35179 20146 19096 37758 15667
2048 1723 1742 5436 12797 1746
2049 7981 6759 6153 5354 3525 4580 842 10374 6705 6385 8283
2050 15796 26387 14366 8034 7038 1103 13477 13093 3371 1043 10133 9710 10876 1506 6456 20810 35120 22438 22425 1964 12930 12528 2604 14668 20302 32265
2051 36318 36899 21007 21041 32598 20823 20981
2052 766 8343 3777 35849 19866 3121 12007
2053 14568 10998 9211 2821 3650
2054 6693 6563 1059 1455 2147 1800 2686 5620 1090 5238 6204 4126 1383 1518 1409
2055 37265 851 4301 33461 22989 4081 13495 26224 20240 5158 796 8395 10447 18367 8695 2179 8434 14454 22992 14502 33084 36419 5126 17631 18629 32233 26869 37090 9218 7636 13853 3324 15060 37582 37080 6718 6708 13554 34080 8966 13019 12581 35939 6441 1478 21690 1472 8950 13816 8657
2056 4940 10407 14911 7653 8318 3778 11892 4980 9574 842 29004 8695 15420 9569 24875 9891
2057 674 4111 1540 657 649 2959
2058 3807 11071 14372 22231
2059 15598 18997 21668 18933 30734 18723 31320 29367 27630
2060 1351 7730 13977 628 5434 5409 12722 12724 19352 18242 31031 17201 10705 19355 5425 26251 10724 26247 13971 1774 14092 17191 19938 1281 8497 25377 13980 12797 1728 22062 14021 13146 32737 12799 11933 23785 18206 15866 4244
2061 25334 33696 36024 10864 14853 8148 22988 20398 22230 6764 4505 18669 35242
2062 28313 18761 5321 8436
2063 1077 3338 2127 5209 1245 12869 5614 1057 8469 2701 802 10781 1053 1119
2064 1882 1981 2447 11517 26188
2065 22358 1306 3473 13968 5436 31769 12509 10130 12140 2462
2066 1384 2109 17204 496 513
2067 4091 3636 22410 19709 6940
2068 2512 4661 2587 7399 23129
2069 11290 7130 5020 5339 9989 9986 715 6732 33560
2070 16854 4766 22565 21518 18877 25802 16236 3846 19190 16237 25221 18349 16127
2071 3895 16496 1010 1029 12470 8702 1011 3906 34940 27530 7380 24493 2698 31361 32220 32506
2072 5001 15 2833 9266 35865 8434 13841
2073 20164 16045 25991 16528 20837 15862 33538 20905 18119 18997 18040 3155 19190 24807 18876 19511
2074 4587 2014 4302 1017 32897
2075 5597 34715 26840 5037 668 24715
2076 2343 17186 2432 9266 37123 33601 5776 36915
2077 16 6776 19021 7703 20056
2078 14397 10208 8021 10750 5383 34114 5266 6317 3838 26601
2079 1017 7935 9621 1826 3486 1038 1046 5465 2822 3045 8669 6651
2080 4313 7331 7600 7929 9075
2081 113 13010 259 794 7884
2082 2917 15822 8774 8788 2163 5218 8770 1950 1636 5874 1073 7417 8839
2083 35002 3117 640 21250 18209 11798 3095 1794 10543 7729 7663 18222
2084 1143 10004 1483 15326 17287 2761 7107 1058 13760 33149 6392 4462 34612
2085 19049 7660 26686 34207 8010 5303 12174 35632 13443
2086 6368 25650 27790 11346 32614 31923
2087 13011 4506 2787 649
2088 16381 4275 31784 29767 20340 5727 4303 3418
2089 17920 13034 15439 33680 5325 13035 28071 8434 26653 37890 4080 17738 9111 5057 11047 22127 12676 14410 17072 17294
2090 586 572 1677 7660 6064
2091 15 821 683 3495 981 1853 6951
2092 5488 674 827 1109 1460 1378
2093 26588 717 16348 34341 37599 23799 24769 3998 9610 22399 34158 28299 27414 13706 31412 35116 20301 34829 9060 33221 13013 23403 20387 37479 18399 34834 28707 21627 23424 36206 22750 37703 14528 22496 34850 36831
2094 19716 15481 9989 2800 17919 1053 1051 2591 8693 35201 37942 862 3189 6325 4010 26483 26465 29260 25201
2095 5204 5530 4259 1665 1666 1310 2921 1675 582 616
2096 24735 18569 24956 33614 30427
2097 8523 21024 12222 8111
2098 479 697 5976 322 24411 4498 21889 981 8281 668
2099 5061 15485 10111 29002 2897 3700 2179 2895 3130 8625
2100 4517 4183 11505 4398 929 9813 2028
2101 2942 2012 12859 7428 2800
2102 13292 1493 6070 5475 10710 7509
2103 5793 3322 8913 14174 28085
2104 11755 14266 25402 1733 14116
2105 1854 29737 3294 1621 7759 26240 2602
2106 26412 34090 15032 8072 3026 24424 34140 14623 21565 15044 15353 22823 457 17085 271 4808 22825
2107 20942 7371 313 14902 480 4826 496 20877 3027 35953
2108 14827 703 2708 6960 13662 19586 6041 14344 3602 7221 13585 1443 4981 654 5050 7961 709 4585 3399 3402 8119 20783
2109 2809 8626 30586 2799 13684 3253 16384 10208 783
2110 3580 31786 6781 13443 12825 1627 5175 13787 8689 8667 8690 8681 2891 26480 21145 8649 8696 7333 4293 14196 8341 30830 2731 33714 8318 11120 8434 3305 5062 8328 19700 11287 6915 13280 13039
2111 5776 10097 4639 1037 33493 20498 2123 2089 2594
2112 9050 5396 9565 11288 17916 13791 30906 30208 15056 9100 37111 3603 8667 2951 3556 3594 34232 29329 8707 6795 12007 7702 27895
2113 2936 9501 300 21978 3495 75 16412 19709 22201 4727 10752 9569 11651 82 22743 16365 1025 33567 8281 1826 15457
2114 7889 6215 2147 1893 7833 1006 1992 1042 1970 15 36465
2115 30222 5053 75 762 709 8692
2116 25095 15605 25635 21576 24512 9639 26133 3918 25633 20519 23245 19442 23202 19421 21570
2117 33891 14468 18432 12761 4670
2118 1996 1802 12404 1793 7472 4323 2219 1129 31914 13208 9816 15337 1077 1496 8772 4205 9459 2171 13936 6430 2008 2052 9450 2200 7548 2370 13835 20490 22661 21633 2614 14591 2436 7302 3218 2504 2595 2156 9462 12997 8949 6464 11714 11362 7403
2119 7369 3900 21812 19479 23063 16012 16671 22609 24078 16026 16975 19190 14841 19259 23966 23969 23968
2120 15457 2801 1717 3490 29051
2121 18037 16236 876 20961 4557 884 19509 29235
2122 34340 36051 34006 27814 16845 26635 34795 18805 8144 30553 14296 12828 12831 11649 88 19554 1538 3245 2782 9989 7591 721 4711 31885 4999 19159 669 16361 684 34851
2123 7763 34454 8813 14812 35683 28082 2531 19898 2365 9833 2705 26932 33281 2578 12041 18133 11511 7696 4205 12755 36213
2124 20229 12828 7591 721 4711 88
2125 12019 174 37289 355
2126 25826 17352 25687 26538 17493 29818 17366 19077 19420
2127 1484 7388 1472 1112 1435 7822 6211 1394 11747 1497 1039 8963 1481 15299
2128 20373 16827 20692 20353 18822 7329 17855 29197 20689 2694 17946 17327 16049 3350 16045
2129 1534 2866 93 0 4531 2044 5110 786
2130 660 1696 3715 8900 11712 3335 10898 5642 1904 930 22742 14975
2131 807 16 8171 1626 2813 783 5018
2132 4186 13 4630 1638 1639 5092 4401 9738 1102 7771 2682 2372 8267 8270 7580 8717 7752 6576
2133 1471 13 10643 11478 11489 6408 4634 22672
2134 12145 24326 8832 35939 8329 21409
2135 15369 485 6013 21721 12452 8030 5924
2136 2008 3719 10700 11625 13130 11493 7908 2171 4474 7942 9674 7506 8850 11965 1193 12399 33759
2137 10834 5656 3568 711 23618 3600 11636 3300 2809 8278 5020 31748 3817
2138 30928 10449 14367 3651 37402
2139 2285 3377 32641 33589 26158 36672 1943 37280 31975 6551 8376 2316 33505 25138 13477 20539 36583
2140 2191 929 2206 1077 6389 11242 1212 14743 1622 19379 16419 11869 1927 661 1045 1109 13845 7259 23918 4818 21734 12449 548
2141 8506 10705 11774 1355 14249 31401 11781 10724 19332 18268
2142 28506 27399 15815 5070 20890 20724 16808 20080 22295 20835 22748 20231 21659 16270 16740
2143 19968 6351 6348 11182 6335 10000 30821 15788 18036 8104 6314 32577 9878 28920 33595 32360
2144 8436 14369 2781 768 10481 11635 785 35337 19707 11732 5913 18782 25860 13041 27865 31395 7371 31712 16621 5323
2145 7839 3212 13324 6332 3206
2146 7927 6281 10061 624 11169 3836 3213
2147 783 773 11650 3312 852
2148 26895 1378 1960 2607 1939 8201 2141 2259 10649 1174 8517 2664 4374 10247 1524 27820 10130 26069 32615 6302 31182 25240 11509 7509 12328 13835 2160 34769 1931 15666
2149 5000 6727 2867 3591 2742 7982 7890 9211 34605
2150 4054 4046 34291 7264 8132 4700 18150 27796
2151 5590 929 14883 3712 9703 1181
2152 12834 3227 9481 30102 9537 14798 11643
2153 2612 36478 15642 16450 10856 11538
2154 8207 1057 1128 4339 21315 7166 22888 12528 11956
2155 3647 852 773 3245 2023 3600
2156 5023 10605 24717 693 14949 3804 4329 8693
2157 4231 69 774 8669 7435 2739 10191 2902
2158 6655 10407 13574 26309 33558 10438 21340 10388 12119 7428 21786
2159 7822 2135 1998 6575 12033 8477 7179 3301 1795 3362 8265 2137 4398 5008 12121 4032 5110 9738 13889 5762 1476 7296 3378 7496 30897 11916 7827 20491 2686 4642 14466 2050 1036 7826 12581 19143 12590 22603 10591 1176 2269 13882 4410 1412 29845 3380 2052 1509 7486 1485 1497 906 2559 901 2037 1829
2160 23705 16574 23816 18334 4772 29775 16141 8767 31739 9551 17751 18994 18990 16022 33338 16826 28174 20956 13708 23011 27459 30541 25988 32885 24959 29706 19483 23348 33478 3842 23266 31716 20349 31358 7657 16237 30853 16645 24858 11124 7375 16030 18744 19190 18734 27814 22839 16633 21422 24829 4794 864 26478 20942 16784 23071 31084 25765 36938 24961 29659
2161 1714 6558 9400 2028 30571 33433 11520 13930 13745 22171 22035 23569 2462 2025 12149 2542 1262 2234
2162 1202 9904 21643 786 3121
2163 25869 30295 2211 7502 13857 7405 4032 2534 16590 7504 2531 23128 2026 4556 12759 20624 2417 23584 2533 7037 1189 31546 13757 11567 2542 9989 36386 13759 22423 35381 13310 2307 36658
2164 2227 4417 1034 7161 8252 8762
2165 18844 7861 12618 33289 12610 10397 10444 4508 19705 10461
2166 4042 3403 8133 943 4058 24467 8134
2167 693 770 4332 5685 12017 2797 9574 3253 852 14374 8295
2168 9526 31534 3032 24053 465 414 24025 28271 28649 28 426 12474 11481 22648 437 22576 34222 341 21763 26330 26047 12476 506 458 28646 6002 17076 22011 15032 30194 20876 266 18886 14898 383 204 460 343 12424 32199 30191 29331 28614 495 10851 17987 21976 34678 17572 456 26030 21902 21453 4805 6013 10312 21973 28619 22819 3013 28861 26351 26344 22010 28865 28629 34792 32545 33571 33308 12160 12314 10508 6385 4274 9114 6653 5489 22761 19107 31564 22009 10558 28630 21563 401 15388 15048
2169 7332 14876 19972 16938 8702 20187 25157 5033 15199 16149 15062 722 2941 5489 1682 3245 16361
2170 5868 5341 14908 9579 22178 14206 9569 33262 14959 29055 3771 4927 9113
2171 21565 14896 15546 13109 1478 24047 19322 13 28628 33675 21563 32245 26355 31677 150 4807 17233 36079 33165 30048 28862 35868 5984 17151 15363 32160 31565 30204 31684 170 36770 15545 15358 25919 26773 313 525 21443 33234 8026 37201 34582 37906 24051 36498 363 355 36780 37310
2172 1613 13806 906 1827 3456 1041
2173 3790 15454 21745 13032 2756 2734 17640 1529
2174 9789 5482 929 1031 7560 4443
2175 10033 4846 9929 601 985
2176 6095 6242 4640 5763 14763
2177 4627 3456 11838 2052 1170 10 11231 2056 4032 2254 2782 657 739 710 3760
2178 27131 16963 20118 7385 35573 34643
2179 11287 732 742 8695 32400 32401 5795 8399 9557 8303 29425 12545 31939 14222 19698 7881 6889 29715 2873 11896 13647 16448 9574 8752 9558 17649 17719 21747 37134 22167 16615 14675 26382 9582 5845 33491 14424 20398 32385 7146 17117 28890 16852 15017 7247 6659 14679 9550 11223 14389 9580 25587 6750 14384 11075 10504 28894 21748 9507 9989 12859 13668 3811 13038 30641 14215 28893 9278 12628 11636 5398 34100 13579 13774 5852 14415 12164 18367 14435 14422 14397 10499 24450 20195 5395 24559 30237 14421 13609 33263 36539 710 9289 23443 30523 13028 22984 34441 21408 11403 29149 21348 15446 22228 33667 2748 30912 1018 4905 10470 7333 28902 24459 14454 5323 35690 13036 24591 24039 34722 23686 2896 26572 13037 4510 37138 34955 13029 24579 21409 15474 3284 31150 24062 37316 6654 31713 36004 31755 34928 29051 36519 37245 34680 16381 26375
2180 2168 96 88 20000
2181 787 1533 6151 3806 4939 9114 7873
2182 31314 1519 1493 2686
2183 17476 1524 4663 15667 12149 1175
2184 18654 11540 4339 12144 8959 8831 9747 15651 7765 24358 10130 7491 1855 37146 8773 17341 15665 1721 36060 1643
2185 19077 23271 25635 24512 25101
2186 10251 13764 1248 1475 4401 924 1471 6433
2187 23554 7502 1714 1524 6497 9374 23556 13897 1513 31274 6464 36914 33388 12645 20432 1837 6071 6502 1702 24755 37575
2188 26415 465 21787 17075 30192 6375 2649 4685 17734 21012 10119 10122 11164 664 5976 21731 39 440 18694 32523 31896 32522 9590 12423 26028 24018 4748 2993 4886 22900 30225 28474 22037 32545 31130 30195 17079 22901 32526 10557 22747 30196 17078 16931 29556 36496 32715 14872 13426 4557 7604 20354 7368 25528 18376 25900 63 28475 31564 17159 17076 28032 37611 33766 31253 510 401 22976 5969 130 26353 28030 17082 5919 34336 28643 24048 36344 9593 23890 36481 26392 5936 492 32459 12439 14703 36705 552 4596 15046 26355 24025 31605 37869 29827 28629 22821 248 28626 446 5989 6008 437 3036 28469 32544 37604 28463 26805 14988 31983 10310 28631 29139 162 233 34606 37761 15383 2999 211 375 15359 28471 36436 34507 22971 32525 26049 31945 311 29571 26037 26027 28635 21563 475 37775 28614
2189 1250 20439 1373 8558 929 14730 2511 20483 7057 8491 8455 10931 9422 1986 3375 6676 23550 12335 4443 25172 11493 888 11980 2199 2267 2321 7502 6500 11976 4384 32328
2190 2017 776 8640 2786 710 9989 7428
2191 2778 2793 710 7353 5252 18548
2192 17 9987 7130 771
2193 6913 3762 6848 7022 9156 10201 6035
2194 8780 27921 1598 10877 7990 14721 1084 9658
2195 9678 31140 19737 3358 6262 7506 12023 26252 17290 13138 15306 25497 13744 8845 25248 36593 2342 24336 26417 4030 12930 7071 1141 2219 8836 14602 9774 12647 2540 888 12717 8827 15672 15796 1995 22426 24363 9753 37733 8849 37913
2196 2847 6732 6722 4709 29784
2197 5362 21559 7504 17687 7765 4263 8775 35531 6187 13448 10743 8799 13407 918 21315 930 3542 4257 2278 9733 26446 6403 6606 13754 5518 9831 1136 2199 6456 3645
2198 15 656 652 18123 821 657 8693
2199 796 16251 25352 28900 34187 8344
2200 2720 999 87 2179 819 15948
2201 1990 1881 13 11952 23040
2202 30376 14888 12878 12855 6702
2203 31602 12424 157 153 38005
2204 7942 8181 2482 2372 8720 1189 2571 1825 34197 25091 34262 4168 29480 17341 26170 10639 15273
2205 23446 3430 12 7233 3783 3651 14167 9501
2206 1710 1018 22422 35647 1862 7753 6648 8634 771 14946 11439 12855 4521 2127 14834 1156 7155 1506 2403 25622 30106 8734
2207 20669 6123 6038 11404 17257 758
2208 13288 30294 12344 13780
2209 30874 13485 6968 13747 7638
2210 14426 8410 13418 35080 26382
2211 16964 20901 16873 23334 24926 35463
2212 15265 1036 20407 15951 23912 4481 1227 23190 2388 25666 2171 16464
2213 31664 6588 12251 20244 11218 28559 624 33240 1725 11928 2703 15866 1339 31029 22349 14114 1750 15878 3111 22350 1783 14043 24107 14086 36395 29082 32158
2214 2917 9436 5816 1985 31727 14985 8351 1960 1604 11231 1388 3362 11716 1034 3375 10783 21633 9912 12753 18001 12151
2215 4162 84 2877 3245 13431
2216 20580 25342 34747 7955 2901 4505 8436
2217 481 15038 6003 5944 448 281 507 14898
2218 35180 12172 15612 1270 593 24057 10907 10036 32530 37055 17053 22652 19210 27991 29379 35412
2219 23882 27014 4474 15586 17398 11529 6249 2620
2220 12018 15038 21774 26344 21796 21787 171 21931 35826
2221 3591 6719 33905 8423 13674 11437 3647 17724 35755 22075 28049 6803
2222 14724 5744 11982 3231
2223 7893 17739 4067 11134 15643 20329
2224 15844 1426 17682 7489 6987 22047 12141 5561 19735 11551 7072 15322 1874 28238 17241 7184 7159 15099 7296 21604 2617 6211 18776 6841 32875 4621 5611 2219 18661 7039 1422 4550 2512
2225 13282 22511 35524 4949 8328 6198 8597 3536 9893 13045 28686 28448 16159 4293 20637 8667 4970 5383 6138 29693 10841 852 7811 32143 10191 22408 8336 10429 19024 8277 6151 6926 36997 31438 5345 4311 11394 7434 4086 6134 3647 12609 29685 22283 6148 15417 19393 783 1547 8334 16980 3075 1709 9247 14535 15397 17634 15469 795 34516 15423 30616 1947 18758 2770 11295 33350 27839 5398 4901 11895 15456 32928 809 7719 9067 20695 11437 28137 6126 5061 13579 5667 12826 19652 9262 36783 4939 21527 11896 11393 3483 29146 2779 12807 23287 844 2834 738 28900 33489 12988 19662 8 5386 22781 12643 29904 1826 7130 10835 12688 14391 6948 12986 14423 10913 9284 15049 15521 29813 35920 34449 3074 17919 9213 29871 20338 3600 4961 34232 33082 19159 25145 19709 13050 9286 1543 36883 5180 14397 19326 4166 33027 21625 3052 27940 20240
2226 2014 4497 1025 786
2227 28922 36903 36314 33594 37920 36901 32858 37990
2228 7613 29813 23224 24448 10052 16145 35472 33359 1011 24434
2229 15 8412 8287 13372 4949
2230 20001 2866 27807 767
2231 32060 25367 12328 34623 11093 19144
2232 2883 12983 8285 27883 11377 5913 16379 12809 33688 36182 6015 5061 3545 25334 12331 30067 28431 21820 3651 10452 29997 13446 8294 28073 33668 26375 35751 13036 3804 7248 10463 36519 32583 36919 14202 10241 21699 14579 3799 35690 15408 37207 33899 8668 37051 11226 33456 15474 31810 37200 33777 13263 12992 22678 8143
2233 13763 8376 30358 35023 15580 5470 12878 12346 25138 15575 31285 22678 13767 25620 19871 12010 35086 37078 15591
2234 36554 20400 25944 3803 10510
2235 2894 2901 2904 16385 8403
2236 15976 18571 27673 36574 31379 28386
2237 27604 27913 31919 10282 21531 25719 21620 22305 23342 32513 18346 16739
2238 9631 1553 1981 1972 1165 12367 4327 11871 14985 1702 12337 6682 4300 26153
2239 9420 5764 7300 18352 2320 1506 1139 1912 26908 11616 20221
2240 16226 25581 19014 30786 8340 9237 7864 21260 32905 12017 8697 34902 21409 1860 3603 3490 13576 36682 19910 3495 13273 37723 33265 35202 3677 31790 30520 32967 9565 1852 24872 34858 37547 30641 24452 21751
2241 18285 23589 27917 28655 24397 3898 27101 27261 34808 23319 23683 29245 3957 27408 22960 34653 24186 27087 27200 27242 33981 27317 27868 32555 27322
2242 13902 15796 9807 7571 8191 4441 8863 26731
2243 28217 32282 11776 31409 5402 8523 14046 6629 34607 646 28212 31502 11757 14101 32158 14097 1361 18241 36329 33188 643 14127 18214 24854 18307 15923 34377 22932 37118 3121 34757 14117 25381 30290 5450
2244 22352 31622 28215 34185 14139 37067 1296 34991 26491 29083 24107 29077 10523 34992
2245 38000 14307 37862 37351 7767
2246 14904 15548 15353 23221 171 22554 15350 436 19184 21724 274 357 5556 8072 36 21754 12319 248 238 14902 5550 5931 9595 294 5923 10558 344 95 14705 21916 17062 4886 17568 335 425 24656 8025
2247 5269 3770 3792 6947 3312
2248 14632 8535 11661 4667 1481 32021 23125 1428 4892
2249 1479 1143 14888 1181 4339 8272 9092 1216 1176 2099 1541 7176 929
2250 16939 24438 769 2800 4963 9831 1617
2251 37262 11478 5136 1433 6192 31310 2290 25227 10591 11833 30891 2143 1203 1696 10666 36863 4483 9857 3725
2252 2531 2104 31025 1478 15681 12388
2253 1068 6609 4453 13780 2025 8858 33584 1244 14638 2458
2254 16168 16195 27744 29855 17835
2255 7797 11738 2822 1211 9761 4484 1250 4534 1130
2256 1439 2559 12366 5451 10066 19311
2257 589 5165 22505 983 7318 577
2258 7 659 10253 2680 2175 787 3497
2259 18000 23036 6314 17437 8166 33301
2260 32431 715 18765 22679 15466 4237 12984 5395 15701 20438 32477 33265
2261 7316 674 5190 9523 1659 2971 7197 10786 1102 1244 3309 5692 5001 4904 1378 14245 7580 4528 6208
2262 33370 36099 1946 7996 1141 929 35992 11496 1478 2782 657 9501 21625 37913 4321 1059 2607 37974 8849 24363 1227 31179 9092 37845 2026 721 24636 37348 23605
2263 25120 29447 10808 14202 31823 35589 10448 28965 2951
2264 6608 1084 12930 909
2265 769 8 2718 1532 715 771
2266 18526 3876 16728 3879 13518 6327 20800 15985
2267 1597 5612 12938 4441 33383 12058 37098 7638 811 35193 1045
2268 9006 24946 14716 4339 27793 33703
2269 12545 3628 859 734 3248 19142 5683 8428 1540 13774 768 7545 2772 8433
2270 81 14196 2902 20229 4294 765
2271 4138 1504 1053 1170 1156
2272 17687 7499 22978 21428 15929
2273 13965 14025 14035 1747 9404 22623 1304 1751 14013 14046 30316 13327 2703 14073 14114 5409 26246 15849 18256 14024 14072 3102 20648 18245 14050
2274 25722 27318 27923 36458 36794 35322
2275 11231 8472 7116 1045 26055
2276 3419 804 5158 8586 2709
2277 4510 2801 14556 786 8 649 3121 18423 6297 18243
2278 193 483 32203 2990
2279 20231 18715 814 9266
2280 4864 30969 16344 3584 24802 19365 812 7260
2281 1057 1240 18406 1251 11327 7967 15645 8946 1043 15335 12595
2282 6509 6551 1524 6403 14892 10642 1526 1457 11510 6431 20807 9826 2835 2706 7509 12878 15643
2283 275 26 4805 17062 17086
2284 6288 6301 2654 12235 21113 3208
2285 743 15509 11941 248 5974
2286 4866 5875 4991 9989 9501
2287 3161 16850 32238 30286 16961 37486
2288 26686 36720 36456 562
2289 874 24737 13516 14275 2697 18532
2290 4999 2801 6914 18366 13033 15449 10500 22074 10488 15457 10377 12330 14371 15448 24457 14439 24460 2865 33562 5913 8343 5865 28718 31756
2291 9282 33680 29001 14585 31462
2292 16622 30995 28963 8981 13282 22779 17919 33895 35195 3664 36751 31749 7593
2293 29384 13835 9460 20490 7122 31127 36218 14766 14736 8385 35801 9775 23834 35794 8203 7557 799
2294 1597 3270 2082 10806 10801 11908 8477
2295 14754 3344 10588 2092 3222 34085 2045 13166 3453 2044 10978 8894 9453 3335 4555 15925 11984 26153 11716 14819 1813 8930 9905 20219 17660 5773 20529 9430 14720 29384
2296 20941 25085 20720 11475 28743 36129
2297 15 2706 6581 32994 6619 12998
2298 2079 15314 7501 25812 14418
2299 6671 8672 2828 814 5063 11286 4961 2794 15451 5061 20726 3688 8310 2761 8637 14653 3583 23231 856 2868 10199 11425 783 12629 24715 6025 14946 7236 29798 5053 28137 30523 3627 5234 3784 24713 8645 31466 5650 14931 15476 30323 35798 6042 33667 28963 3057 5654 6940 22284 31701 15473 12810 30744 21831 19853 1017 37089
2300 248 3018 4840 247 154 21715 9602 468 257 21753 303 5367 14707 21724 168 186 21964 30115 14898 5952 5987 19913 462 9489 202 252 15530 381 286 25383 19911 21598 18077 15551 19977 5976 266 329
2301 5812 5984 17522 279 189 4808 12414 9605 485 142 22091 11412 3010 17572 8022 21562 17153 420 30657 465 6010 9922 64 4815
2302 5021 785 9259 2784 2835 3424 2902 787 7815 674 9893 5685 3248 5271 771 3245 2718 13035 36596
2303 11479 1056 3760 3735 4604 19310 1509 17422 1382 5005 4627 11884 24968 4619 8483
2304 10724 11928 13145 12719 31109 759 11929 14009 7729 10705 13156 3096 1786 8890 8497
2305 6805 702 2835 3593 3630 29436 3575
2306 5186 23501 2170 8411 20584
2307 5018 6057 2851 7938 1018 2739 2788 772
2308 1247 17673 7062 8033 13885 2523 7126 7159 20141 11503 9671 25921 14983 6306 12126 11520 20280 7174 7036 8801 5200 8776 13754 6433 8802 13465 8784 5575 18320 8074 8813 8821 25935 6 16585 2246 9525 6422 9659 2226 19207 7114 7560 9832 19737 10595 4034 3725 25325 8796 21688 2511 7043 32046 15265 25450 7571 13930 24632 20306 6618 10192 26844 7092 8824 5539 8820 7910 8866 9331 7135 18776 7008 7296 19209 1492 6500 7287 1816 13133 13905 8815 2284 25498 26328 34493 8928 28044 26934 5763 12131 13873 26516 2350 19143 4018 2599 25228 25134 10351 25323 25668 8842 8834 37428 12931 35387
2309 4996 2767 3284 1533 93 722 721 2748 82
2310 3074 3647 10395 8669 2014 10752
2311 7150 17917 3245 7573 31884 13035 2799 18114 7878
2312 1465 11908 1983 7823 1482 7274 1797 1462 1134 8950 1698 4428 1476 12581
2313 12629 2052 1866 7339 1802 26683 2445 1944 2112
2314 4331 3291 11073 8172 3600 852 8020 2904 2823 776 36641 7428
2315 1812 8784 25624 2189 7699 9797 2064 4339 2851 0 1544 23759 18050 1979 28084 9324 920 4152 11615 7159 9017 13000 15797 25495 1385 1690 11664 7910 2347 1970 2443 10246 1816 11503 6262 20448 1478 1893 6974 16370 4183 1384
2316 2706 762 2968 2712 783 13912 406 2023 2724 9501 3245
2317 831 1271 6640 8004 5162 7529
2318 11650 2815 3483 2942 7130 2783 2014 3495 663 3245 2782
2319 9368 7702 7814 7646 5670
2320 2014 6895 1826 1446
2321 21298 16601 16829 22751 20858 24084
2322 6104 10643 6408 6224 7915
2323 18011 28713 16354 19166 18541 26108 20917 18546 23160
2324 1166 1111 2191 17656 2259 15185 1373 697
2325 18737 15973 18185 16045 16008 24394 16657 20111 19731 7387
2326 652 20191 2933 7150 1244
2327 4445 19195 2686 7115 8786 1818 20274 9704 9749 15797 10350 20039 12266 35377 7628
2328 18299 13026 22936 31502 28216 16859 628 14014 7757 36879 11757 12740 14551 26856 35436 32662 31434 1337 1340 630 37145 5450 22905 14121 10539 14101 33635 34758 22330 35437 11787 37951 37919 1360 32675 35903 8494
2329 2809 3573 3259 12859 13025 9988 31638 4301 3545 14366 2945 37642 10503
2330 9153 15430 93 8399 3424 10709 14521 12894 9574 20342 10212
2331 25349 3276 5484 2603 1979 2549 24062 15277
2332 1268 10029 6643 10276 33365 35412 29597 6644
2333 28300 5251 15821 16079 21377 15960
2334 2010 4229 1259 2443 2604 13480 2262 2360 1524 11962 1500 9826 8830 9229 5787 1375 905 8823 24285 2399 910 24014 13857 1231 19224 7560 2440 6216 12346 15269 8369 2540 11098 2587 25321 15672 26183
2335 12645 2549 14625 3301 9357 18117 23461 24378 35789 26605 7630 25460 11961 9850 13375 13401 15680 1521 15686 30527 4347 30834 1090 12147 12878 15339
2336 30518 9585 34742 12625 32787 9373 14375 26012 9013
2337 2819 10372 2718 773 2818 1025
2338 13433 4007 19529 16292 10224 3930 10223 17867 24427 23019 15955 24736 16879 16635 7327 16736 20885 15987 2695
2339 23153 5814 2327 2436 30653 2157 2398 33973 7569 35013 31043 23190 11989
2340 28574 18342 21521 17793 31965 9074 29296 20296 3350 26263 29197 23973 33828 16905 16552 31962 28285 16657 16058 16174 22399 16066 33916 30267 27723 2698 23630 27690 34169 28387
2341 31578 19802 15937 1261 24390 2632 15669 23295 24684 13403 7067
2342 35951 134 35866 76
2343 9988 25860 5175 15456 7261 12679 3600 13025 14397 5063 15464 10500 12783
2344 1507 4304 2410 15249 852 5820 929 1187 7298 1189 8565 1037 12161 2422
2345 4188 8735 6205 26110 9382 1464 13377 4366 17286 4181 17519 10667 6614 10673 20272 17423 4201 4654 7699 17108 26420 9386 6550 15328 4175 15289 2345
2346 9904 10133 30525 2815 5020
2347 1702 7517 15843 24848 9840 12491 24131
2348 2748 16537 19005 883 8068 22722 6319 8433 5248 17302 3918 6732 10896 3736 12496 36535 7355 24341 11412 14284 1015 26556 13094 24934 769 69 1533 8925 2809 2904 1529 10208 27795 868 6687 3047 6307 11290
2349 2777 1540 649 1003 2740
2350 4161 15 3423 784 786
2351 3854 36355 26541 30497 14276
2352 162 181 4814 171 214 328 21785 12456 13105 12129 257 2823 13190
2353 4426 10647 1555 2915 660 10714 4189 32328 19227
2354 2902 2786 773 5246 88
2355 7441 32928 17744 2886 3570 33310
2356 14307 34852 9551 34166 21033
2357 22687 16001 16354 16886 9636 23962 25972 20177 18808 20155
2358 7427 5400 21147 8341 796 3078 7424 3490 4301 10752 10942 87 2737 9989 31842 26836
2359 23848 8396 8316 37251 16978 28004 30906
2360 665 980 2754 2902 1860 2797 13446 3245 774 9501 7428
2361 21271 4979 3424 4301 2902 8404 1018
2362 15052 27890 3604 26292 18113 33265
2363 3500 9552 11635 10463 5395 37572 28964 36684
2364 743 69 868 19291 765 824
2365 19660 795 8634 1551
2366 34391 15468 15472 12613 15060 12631 13041 12906 35596 21358 37020 15444 31713 35202 8336 25858 37890 14667 3799 31449 31506 8645 35257 36884 14404 19910 29955 35209 26014 19018 14643 35583 3570 668 34505 12673 30329 3680 36747 7442
2367 1449 1647 22393 4560 23473 35668
2368 8486 1803 4516 10713 5477 2087 20796 5151 22020
2369 10778 661 2915 9731 2191 15508 5 1855 25811 7900 2278 11962 2631
2370 13495 8339 2835 1019 2638 2751 4091 8672
2371 15041 28632 24051 19184 21809 37048 36497 244 36169 37482 17034 37774 14897 37538 15373 26356 9593 37362 12655 5984 36780 12415 36773 37038 37981 24053 3031 29571 29562 33234 36482 9526 289 234 36769 10557
2372 24158 36888 34480 36763 25760 33017 34894 34803 37743 34804 29466 36082 37031 24166 27580 36889 37601 22298
2373 6659 23501 14216 27934 25487
2374 14172 2015 7545 9568 31432 18844 7708 22412
2375 2193 927 7464 1043 3048
2376 19928 29976 7581 5394 37018
2377 3220 1931 10969 9841 11716 7395 9673 2544 15064 31727 8476 2594 5776 2321 26010 8355 889 2445 31975 3260 23837 19739 22039
2378 2381 36379 22531 37077 2298
2379 6668 22274 29149 6803 20398 30912 14434
2380 5102 3721 28043 13744 29495 30292 1245 22590
2381 11546 7968 12869 1797 2165 2303 19816 1803 4270 11980 4388 1145 8250
2382 2526 7472 33547 8562 7515 30811 8824 2608 2633 4372
2383 625 628 1359 601 29803
2384 5685 16415 2902 4897 2184 6658 14439 22411 6653 9393 22434 8757 16621
2385 30278 1094 3734 1992 3425 1221 9778 13406 6408 11686 25459
2386 34285 36677 457 36345 28634 26353 8430
2387 2712 14 33935 4552 7335 4301 7239 22280 26784 19448 3076 8667 29228 10492
2388 970 18704 36251 5418 11261 37175 31769 15887 3115 37763 18410 22005 961 29244 10551 23926 1772 15866 32380 3116 22450 3125 37145 35444 31764 14092 17549 1788 3124 14064 22345 36197 30296 12792 12822 35773 30289 7687 25874 36412 18226 36319 7672 14125 30297 25611 960 34601 22353 28486 37355
2389 2763 771 768 17 1716 2784 2739 786 8171
2390 13089 16791 3865 25510 16964 18572
2391 28780 5392 2796 13266 30206 6063
2392 16599 16333 16114 7373 16903
2393 24489 16272 3871 34259 37952 27462
2394 20069 1072 9736 26442 11560
2395 81 16 3245 2763 92 9089 5340 762
2396 1470 1240 1145 3275 4026
2397 4505 694 5340 8433 9989 26555 22771 4314 8080 648 2781 19716 20400 770 1136 3426 37212 24579
2398 28760 14365 10463 7428 10074
2399 18941 16832 7380 13530 19731 18724 16036 18879 16320
2400 2170 735 2964 796 28182 37045 846 6044 24874 14956
2401 15530 22018 427 24048 21893 28772 9520 28774 4806 21938 21932 21767 22556 260 21955 36770 28641 30196 28479 28859
2402 3248 2737 2742 5685 3245 5147 7984 4963 8398
2403 1901 4036 9805 1612 2380 9019
2404 743 2017 8303 7324 24943
2405 19631 3556 21749 15056 35024 3674 28932 3087 5686 13676 34344 25412 2881 10212 27795
2406 10449 2891 7439 10335 3503 7130 18967 15509 4286 34650
2407 9988 3771 4933 21408 4922 17715 36641
2408 1256 1245 9447 2813 1230 1317 18405 1146 1828 11956 13625 9468 1329 13407 11337 4524 15151 22417 11102 2232 1157
2409 2901 11071 5342 3621 2641 7348 12311 9989 20398 19023 5319 11394 3284 12809 13791 11042 16360 4094 32542 3259 35061
2410 17831 23439 20120 17010 23694 16139 29531 17351 18741 9635 2690 16843 3916 20106 18014 18554 18937 21670 15976 878 27315 9611 24397 19089 3151 16061 10987 18744 35229
2411 8106 17257 8520 13622 15786 6347 5030 25436 11148 13640 24744 33954 12245 34083 20825 11698 24309 8167 30821
2412 10759 261 460 21563 8431 35722 17084 5938 36007 28631 21810
2413 11154 26078 4065 5884 6347 3096 1280 12241 13397 12226 17258 6333 12252 12562 16398 19964 19070 15785 8521 4055 20951 32305 17255 3186 28823 25504 16236
2414 13936 37364 20510 4504 7424 25860 2023
2415 2781 636 4863 8504 1306
2416 2907 703 852 715
2417 30970 16832 16003 7385 16048 7375
2418 16030 19784 10570 19776 32563 19186 34694 30807 22466 36140 16309 31572 20349 26597 3865 35292 32962 16236 36272 32566 29924 37925 31329 24213 26861 36121 22952 23342 16660 29929 30528 29740 34079 25718 25039 17820
2419 2800 4313 796 3055
2420 2052 1320 10588 5471 10787 2388 11017 5621 1965 1496 9904 13296 9775 8772 1487
2421 21669 12786 10698 16136 16735
2422 10649 9653 3702 2053 10700 7250 11631 5788 15312 10876 1905 6387 1985 7491 2395 2419 2540 23893 2440 12070 5731 11998 7570 15321 26168 2604 1243 8177 10772 6531 33588 36972 30370 2352 659 33257 1946 15066 2247 6492 31202 37166 12860 2606 35420 15683 4654 2273 34317 37670 20321 25138 29703 4032 2397 2415
2423 32503 27125 35298 17824 15987 24181 3143
2424 16188 13642 15846 3149 3922
2425 2559 1243 1134 7193 23813
2426 20305 23355 9841 13094 4539 35905 1177 1594 7123 4419
2427 16128 2698 16106 3915 13527 872 16034 22704 29530 13520 16827
2428 13763 9988 32694 2796 7699 11119
2429 9998 4070 23715 34081 36162 13423 26566 3651
2430 20716 5190 2259 10328 15317 1597 20036 8831 17254 11277 19948 8847 24379 27955 22433 10248 23771 7635 1594 2365 24675 10900 19995 3732 7488 35390 33584 6226 6215 25968 25885 13092 14807 26218
2431 3337 35442 33052 36190 26094 1995 4524 37732
2432 17419 9474 8392 4439 14973 1264 13299 1200 4427 20064 3833 8385 4670 3139 4035 23354 8762 5363 11962 7491 12878 15147 4337 5473 7074 1506 26602 2617 17681 13123 25092 15135 30365 9627 13776 1166 7995 2412 16465 18358 10595 8816 9414 18157 8773 31141 781 9424 10673 20798 1992 24345 10950 19224 26650 28782 4181 26137 1316 14420 9019 1067 20235 7784 19799 15274 1245 25677 9838 26272 35698 38025
2433 31748 36708 37800 3771 37801
2434 652 2791 2835 715 3045 7261
2435 18750 11448 18708 7387 18939 21286 27265 18948 2697 19190 27315 20955 16504 26953 24930 24546 24982 20917 27219 27308 17905 20889 17276 25852 21295
2436 4648 1720 19956 2135 4610 19208 2443 6587 2295 5387 13147 13014
2437 30175 32055 18922 27523 20932 26974 31721 30480 16658 33863 11124 15996 28832 26459 34534
2438 32978 20444 12519 1264 1700 10979 12927 4539 1402 31995 12140 2519 14463 1145 2148 7076 4605 19889 11560 6261 1515 35743 1031 29721 20235 7510 26909 15685 14467 17530 2445 1135 2246 35213 31927 36403 23837 22036 8860 4661 5216 13316
2439 813 36869 26320 19440 17953 25099 19419 26204 25835 2774 23223 25691
2440 485 10630 14505 425 8028 181 267 9526
2441 33567 82 15195 8696 16226 786 12117 8281 37364 32431 1852 1826 34257
2442 704 1853 21307 20471 2829 9103 11438 9132 8298 26426 8636 5862 26423 9547 7242 14921 22234 36043 7428 33592 3076 33667 36415 20241 21341 24563
2443 23505 14829 11728 12898 10424 7436 10414 14948 14944 5022 7390 8670 3806 5726 8435 3313 18162 12016 37345 12534 9369 5503 8153 14621 18783 8623 10367
2444 36606 32745 36701 34234 15222 7259 36337 19450 31234 37168 25830 15224 37957 34181 33517
2445 1136 13940 4377 14818 2632 30601 29615 1553 29150 4170 4186 7631 9804 34876 37549 4528 26605 4169 1441
2446 6478 890 9019 10900 15320 7697 25226 2224 11682 8179 31110
2447 24453 9128 5009 10077 10805 9577 22776 12635 19865 37081 3553 9139 5701 9286 3811 12540
2448 4963 28909 34770 20584 34918 24561 14396
2449 3702 5134 9838 7802 38011
2450 22386 15340 2678 35702 13311 4365 15660
2451 16859 17865 18918 17761 16469
2452 25860 20438 26310 13038 26011
2453 24507 7373 30788 28322 20858 23702 20842 20896 19479 11450 19172 27273 20846 16306 27272 31737 16121 18188 18721 27279 24930 26948 23672 28658 20120 16268 15972 20889 18518 13523 27202 29492 19506 16241 18956 18339 3909 2696 20935 3842 20692 29471 16568 18443 19259 16238 25285 16337 20943 28802 16263 18577 20085 23820 15820 18552 16320 18186 25124 23388 16642 878 24978 28308 18988 16266 20941 10987 16292 16846 18285 20088 16126 16996
2454 22231 3804 14945 7652 36217 10197 35659 13268 3605 33665 26011
2455 24972 8196 5731 22871 2537 37267 802 31758 18338 37791 28856 2500 33056
2456 18293 27277 16896 18865 18460 18459 3884 16113 25284 21812 3976 10986 28801 15819 30710 20712 16320 28589
2457 24626 24157 19547 24427 16675
2458 8849 26315 2482 5084 18154
2459 4497 5685 4500 821 2941
2460 649 2782 3497 24636 2808 3489
2461 4522 5485 14294 5789 5484 9771 7126 7567 7181 5583 7631 12391 4670 9459 10787 1109 7570 13306 10005 14694 1257 1256 14420 33425 35683 25139
2462 9474 2866 69 1538 9266
2463 2877 7115 2172 1442 30249 16377 23223 15414 24457 4509 5522 1551 5359 24879 12897
2464 7371 30497 27541 29281 10736
2465 7560 2317 2189 1928 1804
2466 13012 23811 33362 29014 17252 21589 34796 16523 7329 18377 36829 26633 37103 16967 18188 37197 36165 29013 31415 36220 37460 34792 28927 21401 31741 30867 37216 31803 16739 18376 33216 37057
2467 12094 1269 786 9402 20426 29059 15072
2468 16601 23341 23345 30130 3909 2693 18187 18443 18998 25506 19259 36687 3431 17010 21412 20771 22313 16874 27268 15818 16829 21679 16282 37346
2469 7338 8287 3045 15 773 7884 566
2470 15563 31889 2835 674 9547 5867 7950 29108 11425
2471 6974 1134 6557 4024 22593 1249 5607 1948
2472 93 11649 6951 25893 3356 7982 10612 721 1682 760 16361 16382 3701
2473 9335 32431 29811 8503 16226 13372
2474 14418 2196 2343 1045 6500 12859 9501 29160 7627 3245 23893 22431 31177 24349 7510 2342 11561 12645 1618 11511 12712 15265 2482 14420 20302 15315 20235 24368 1129 1240 4334 4032 17112 8947 2705 20311 2546 13869 10569 5356 12004 4661 8287 1325 10096 2574 10900 35527 6970 37313 19125 18384 14641 19954 14875 11599 19127 5466 6575 2120 7634 2699 22433 9838 1044
2475 11200 11164 31650 20609 11211
2476 35154 664 14603 6334 31870 35726
2477 902 13288 2028 13290 11547
2478 6046 2170 1351 7151 939
2479 19175 22710 13436 16127 20899 16086 27130 21670 15982 19119 3922 16778
2480 3702 1429 4871 12581 12716 8946 5548 10691 1388 4633 1138 1053 4375 1467 2093 1245 5319 8341
2481 311 5974 17989 20409 347 481 13106 13099 16759
2482 1377 6523 1971 12581 37097
2483 17864 852 5378 10863 37499
2484 6075 17667 13758 6428 8200 8726 1397 3379 6565 5626 1484 4651 1474 10634 18654 1506 17427 20307 15674 7631 31759 7122
2485 10474 15311 1397 796 9287 34447 27772 7627 24652 4938 3539 11025 13793 15702 14418 30368 34290 4257 8750 5378 35052 14367 33804 11636 14329 14397 31788 4913 29495 30516 8677 7833 9288 9584 21625 9285 28900 14428 12015 22434 28899 12645 36177 7630 14425 22282 2709 9988 28189 28913 22774 15456 19865 12600 6531 24378 24370 29647 5384 22781 10448 15436 24452 15445 2175 28902 7187 15054 15055 2462 13
2486 2630 13 11653 2186
2487 9251 21536 27026 12859
2488 3130 11290 7658 11400 11408 8412 10410 9586 8422 14539 17603 5354 34071 25907 19843 11636 37572 34464 14432 31748 26375 8012 17455
2489 6489 20286 6550 9858
2490 28417 22637 34312 18307
2491 3359 15840 33195 1386 12003 37702 3378 4799
2492 9445 9789 34213 1831 4665 26097 13794 2411 14820
2493 715 2643 5371 4840 441 4741 1136 7888 1240 1422 4323 2822 5992 3032 50 283 317 4599 18078 201 13489
2494 17880 18199 17010 19190 17897 16106 20932 27314 25981 26970
2495 15456 23475 8626 10505 6059 15052 852 22411 9893 20400 10508 37829
2496 4327 10900 14779 7406 7490 2127 1431 33425 7233 19276 4670 35131 33618 1439
2497 23710 12225 12533 9042 17266 2656 19926 11197 6315 4685 18527 16745 16063 3998 25201 31965
2498 9033 29098 10000 6348 15783 29398 7836 8103 21036 25540
2499 6655 23476 13310 11652 12679 9989 648 2754
2500 6496 4589 20035 4488 7830 14299 16439 1053 6430 6433 1693 673 1535 1039 2974
2501 10740 26224 2509 31164 28754 6531 8470 7111 24370 24371 11596 24392 2579 12056 6503 2633 22430 15674 3724 18132 29885 2540 30416 25546 6492 15749 35244 20322 2523 17245 2537 17254 4334 14418 30810 30916 35193 7637 21867 27771 7507 34514 22433 33894 930 2125 24675 10666 1247 32172 30171 34139 5524 30834 12391 37115 7630 13756 2621 28175 4661 8828 13857 1972 18135 8717 1315 25885 3346 35152 4567 3831 25329 4879 12593 30372 37881 26180 36867 6423 36530 4471 31975 37817 6537 37549 35857 12716 32306 22871 36611 3714 17238 1129 2971 2075 7793 37618 18133
2502 20339 5014 6868 35340 31439 37916
2503 3747 1328 9461 1922 35177
2504 2797 1532 2734 711 7425 2796 4900
2505 12010 24848 8994 1808 1893 16743
2506 2699 4422 10964 16920 36620 656
2507 12415 3027 9510 28275 4808 5984 34089
2508 32477 12118 27940 20056 9365
2509 23129 2360 6456 4474 25091 11098 1913 2397 24326 5781 33370 660 8375 7506 2507 2455 1156 8823 11311 22535 2553 12593 16585 13403 5480 24344 1598 7489 8721 1898 8850 14794 24352 33425 4654 17341 14589 17681 33657 13755 1329 20510 23450 13035 4661 773 738 28725 14420 13121 35787 30372 7491 36248
2510 9883 11489 8692 1540 4500 10447 5051 14918 5175 3590
2511 16306 16845 16882 23955 20368 23023 25204 36101 25073 28807 31634
2512 20780 28663 8083 15611 24731 33746 33911
2513 20455 7927 1069 6159 2709
2514 13905 26328 23130 2064 22036 37184
2515 24326 1061 781 19096 30370
2516 6148 8697 7956 6049 15 7139
2517 10191 8657 7428 762 32587 1531 0 9501
2518 36762 36620 7942 3274 1044 1103
2519 1524 21154 20510 2902 26814 30816
2520 8784 20810 5485 2813 5381 2023
2521 1804 23583 2224 31161 1919 23943 12041 2343 2519 23128 2191 2428 5482 12693 17424 2589 2541 2053
2522 16585 22144 8667 34107 8757 9013 36641
2523 26666 915 8539 4495 32732 13058 37347
2524 5188 2902 15 5020 17915
2525 80 721 4711 3133
2526 2432 11681 3518 8062 6660 8849 4422 9789 7108 2944 22760 20436
2527 13254 1038 1432 9800 9840 13747 24390
2528 13175 7560 3364 34669 9845
2529 11629 10452 1075 5451 19998 3709 23584 29817 30677 25863 15197 20539
2530 11652 30463 8292 33008 12330 36451 9501 33697
2531 16879 22399 13523 23019 16860 20885 20776 16736 9635 15815 19510 23652 20918 3922 3972
2532 18465 23956 21121 26472 11470 20907 22402 26109 24814 23336 16034 23013 16778 1010 17844 23901 18748 20373 16164 26959 27280 20078 24072 30437 23384 27650 29242 29463 20161 17824 27580 16507 23060 24446 26561 26729 20350 3974 10735 870 35569 27674 30174 20157
2533 7204 1425 10627 13626 8946 1140 1478 6403 1472 35243 35508 21684 4438 26437 2440 20221 31593
2534 10499 36732 3782 9557 21857
2535 8752 771 2757 14366 14374 9501 13769 4590 9572 12986 2706 6972 4707 4384 10952 3324 0 9624 21624 1682 7428 12825 4936 12901 2766 1005 826 91
2536 19492 16103 18581 7327 21296 16642 20837 16971 18956 27274 18937 16836 23343 29619 21286 20775 27256 3928 19524 29761 27273 30012 16038 19117 16122 27102 26955 25219 18487 32168 3872 31716 26082 32393 19509 33518 22840 19518 26965 19512 22540 19884 33039 30709
2537 25536 19243 21176 37148 7842 23029 36315 26838 32826 8031 34707 28922 36428 36976 33100 28110
2538 9596 1361 774 22033 496 2674 18298 22337 10530 14089 22935 14124 28871
2539 10952 3518 21625 5339 5389 9496 6199 21624
2540 2830 3600 2902 2942 716
2541 7542 7118 17228 5266 12267 6469 2766 5727 1005
2542 34050 23114 35593 33553
2543 17766 19880 18744 15859 37853
2544 1251 23181 8483 1243 9388
2545 1663 1114 10249 13731 1518 2122 799
2546 4217 9629 1964 10588
2547 3716 20598 5212 11668 8821 12707
2548 9488 5194 1431 5216 7089
2549 30629 3253 3606 4505 3483 17919 17918
2550 929 1799 1048 7493 2320 6408 11832
2551 6652 4236 3489 22107 10890
2552 19895 1880 2482 27831 2564
2553 25648 4018 11959 9062 8196 2496
2554 1949 2472 13094 34139 1840 3381
2555 796 3317 7652 22777 9624 2832 32042 3570 34424 27978 4898 13793
2556 1459 4346 2126 1805 1429 7112 1864 2033 3294 4372 7309 4139 1457 2443 3729 11682 1037 1378 4113 2193 18311 1893 5567 2422 3301 1377 1970 2618 4338 4116 27001 1499 7558 13734 4550 1176 7019 6053 11595 2022 7560 3167 88 10712 18664
2557 1513 1837 2166 5005 12391 17425 18427 28060 13138 2332 22674 29495 2461 33616 1892 34306 15745 27025 24285
2558 20477 2317 7752 14779 11629
2559 722 912 36573 36060 14614 2381 5807
2560 3844 21678 24494 10731 3900 32733 33721 25981 18014 16812
2561 4158 15109 11501 904 8845 1398 7501
2562 12327 13574 11733 4331 9237 21829 7647 7239 19960 842 7242 12827 11248 5175 8428 14926 7428
2563 2799 5018 1003 15866 22933 22932 8498 18243 15913 1010 25900 21364 12283
2564 14667 3683 25121 15476 3662 852 704 2887 3684 26012
2565 10485 23264 29168 12988 18931 19779 29865 5269
2566 15984 69 816 17157 18653
2567 5403 2842 9987 19645 36187
2568 2596 17380 32730 7208 13121 11886 17392 25363 19871 20010 29172 4634 4602 4370 6093 1053 22884 28038 6408 22740 4191 9230 15802
2569 4162 2944 2938 2774 784 2936
2570 12804 10163 14493 11268 14127 25317 7667 31030 13148 18236 14258 18299 18283 22055 19341 12745 12746 14052 8501 14066 15909 13327 18702 14132 28770 13974
2571 4531 4555 33609 11977 2351 16375 33821
2572 764 2748 2894 4225 4620
2573 9549 35094 8767 21402 32714 21554 28704 18379 26636
2574 2699 2056 9422 1591 1068 1887
2575 15760 15756 11185 24742 32402 3212
2576 13026 5020 9783 21624 5339 33319 2867 3245 2806 149 21949 480 26555
2577 30720 5906 12986 775 33503 10445 5453 7452
2578 18899 7382 7380 26532 36062 19494 30032 27518 31496 31346 26967 16499 17013 16502 28301 16003 23698 32580
2579 27442 16895 6320 31916 16970 4795 2012 17897 25717 20527 22463
2580 1244 4158 23562 8840
2581 8955 1518 1127 773 2916 2699
2582 5469 2160 2227 1094 4168 7035
2583 4126 1139 13071 1874 3823 6164 1187 4374 1198 8197 3651
2584 18662 12576 21166 32701 20497 9521 12516
2585 5649 5501 3317 4900 8
2586 37187 24697 11994 12030 3382 12027 28064 22962 13862 30949
2587 31788 3069 6014 79 676 21356 14911 27942 33086 29634 6890 14660 21203 35675 3497 5186 21301 19235 35755 11397
2588 34070 22048 16385 22050 6658 4589 24062 6722
2589 21800 440 21771 33232 114 15373
2590 36652 34160 20376 18379 23928 21541
2591 32048 814 4015 2365 13 12131 29906
2592 6625 12938 18153 21623 2712
2593 37254 22035 35442 37436 37247
2594 20766 15608 24156 16809 16028 16477 7386 16840 20103
2595 19453 28877 26537 17931 28715 13194 23250 32070 26539
2596 7571 2481 13757 24363 4139 2309 37818
2597 10410 8329 17114 18366 8611 28094
2598 6310 10146 8111 7838 6336 30186
2599 204 12468 11412 259 306 3032 12413 116 20870
2600 18705 8185 4403 11104 4450 5639
2601 5539 13317 9315 8236 33896 6165 9739 6237 26386 1556
2602 4605 2093 5205 9422 1176
2603 586 8047 5313 29356 35546 4848 23998 33245 29056 29524 29061 35703 9944
2604 10982 16080 23310 14527 14528 14838 11448 26611
2605 21458 16064 9078 15969 34787 18827 36513 31514 17328
2606 1136 12143 15664 6576 15275 1244 24376 24357 4668 16756 5753 14974 35992 2602 11581 12878 36915 31688 19274
2607 2865 12168 3598 11390 14374 8376 6020 33320 12274 32633
2608 14106 14051 22926 15873 29196 7853 1362 30795 5430 32120 37355
2609 2384 7967 9832 13905 5386 28898
2610 12069 14876 16146 1089 3346 1388 14796 24971 9737 21170
2611 20424 31520 20430 12169 10016 37234 37427 10285 24000 21329 19056
2612 751 24566 13622 13362 12216 28560 1752 10188 1306
2613 9390 9393 9012 2012 19662 6254 649 1083 4337 11877 1089 7766 1833 18006 1714 33590
2614 13832 23603 5466 1960 13315 2048 2552 23605 2246 2546 36386 11098 15251 11984 1825 11278 5482 30947 2587 25330 1221 6619 8271 1204 1050 11480
2615 0 14991 6886 13039 6774 28049 33248 12679 34227 31885 26308 7236 35690
2616 21507 3378 34389 1965 2588 12695 36643 2533 36672 35983 22867 33020 36213
2617 4463 11862 5814 7153 14588 922 6621 23547 1840 13051 8188
2618 15613 16241 30135 20946 23177 30533 10736 17887 26966 13698 17442 17880 26964 10735 14284 32393 16022 31716 16677 22540 29740 18994 19524 33922 8083 32782 18923 28301 26535 34996 33367 3902
2619 2285 2346 2295 25323 2368 29616 6628 2800 5023 1496 13094 14719 2599 11996 14808 13930 34575 35616 36054 2566 31180 31976 20235 4015 14816 37087
2620 16240 29706 28454 20963 20694 11124 9638 16139 34259 36000 25200
2621 2806 1078 5583 10592 6841 4270 2050
2622 17106 4698 9928 2920 5163 566 4857 5287 5312 564 4849 22082 27989 4695 567 9485 32426 12976 12108 35540 33245 8009 27829 28815 12207 12177 8048 29379 5316 35681 28817 12080 29518 29377 7531 28818 7534
2623 1077 1051 1031 1057
2624 6119 1981 8063 2806 8667
2625 1659 6204 1240 1439 13453
2626 9986 2781 10753 776 10750
2627 4771 20373 23008 37406 3856
2628 26045 15047 21728 17075 383 23576 15727 21737 5927 481
2629 18769 7316 18100 15512 19657 7248
2630 2959 6717 5045 1716 90
2631 1257 1101 18407 19834 17671 12379 9804 3348 15665 14756 12695 9829 23280 21596 23547 28329 24345 23756 35522 15650 8831 12645 13906 15248 8773 13754 4432 24373 30375 15796 34877 36713
2632 14779 2173 7302 930 21632 10845 2295 2326 2146 22040 9388 2397 1448 2379 1931 14591 1904
2633 18257 17194 15855 14070 15857
2634 12019 21959 26357 460 30202 30470 21776 3026 4753 17989 30833 20878 16228 22800 34585 34336 542 243 14898 24051 28861 28633 3006 17081 35955 37776
2635 2818 12 4862 2718 5905
2636 14418 6500 23282 13319 904
2637 693 9390 3309 5685 4963 5013 1084
2638 5518 4186 33892 6581 36060 26922 34498 31127 7752 13094 35359 5812
2639 22386 33743 20321 32306
2640 26817 10482 11046 10508 3771 3811 9585 25912 33776 12825 9553 37034 12331
2641 11641 5417 3106 1796 21247
2642 4741 20487 311 21982 12475 21451 28641 543
2643 30124 22898 34338 21988 21790
2644 12126 6407 1470 1953 7697 21692
2645 13301 1250 10659 1498 15640 1526
2646 853 19677 9279 35208 31642
2647 34206 12179 585 23988 4699 5162 9574 37829
2648 29147 10866 34344 3803 14436 851 852 15056 10815 3291 1018 14679 28849 37045
2649 20807 6433 15262 4359 34202
2650 15470 4995 23450 711 24456
2651 20843 16908 7384 23434 18342 25825
2652 3999 20932 18946 20179 20122 23956 25598 18456 18744 18956 18200 20720 23968 15862 26583 23071 24292 26146 23253 23431 30709
2653 844 5845 7833 845 13002 7435 69 1038 12129
2654 13095 11586 660 17479 11720
2655 7719 5002 25658 10467 11374
2656 28735 33038 31319 23671 33039 34354 35715 24955 24478 18286 33722 32104 24930 35571 15202 29707 24552 11449 28149 34921 28835 22750 32783 34356 33368 16094 35413 31620 33735 37770 28593 29168 36754 3966
2657 7001 1810 1923 7044 3382 19205 11863 2363 2704 2493 1876 3135 1887 19207 4327 9909 12134 13756 16590 1513 5807 11590 4112 23129 11082
2658 15455 22122 5189 35916 11049 14320 19024
2659 2806 2706 765 8404 3771 3248 10491 4557 7166 7064 7129 20189 5020
2660 1682 2012 1852 7547 75 6119 3121 12948 11745 7353 9677
2661 6331 25210 12228 9301 12233 29380 13328 6369 6372 27781 12237 18507
2662 16251 14940 5060 9583 20241
2663 15154 6450 5227 6502 31990
2664 4585 9545 688 18095 7140 5012 9050 2022 78 4497 2758 813 18986 6325 3179 721 2946 771
2665 676 1717 1628 1005 6252
2666 1685 13189 2709 4111 811
2667 13441 2806 13446 3788
2668 2058 1397 15645 1408 34018 25138
2669 5438 18257 32159 22945 7687 7730 35510 14077
2670 13095 7034 1496 25925 7965 12647 14888 23565 13900 17214 37181 15669
2671 1524 25304 3352 1011 30207 23273 36797
2672 23438 16236 20103 26510 16848 16045 16734 20082 20852 19478 26108 16060 9633 29531 717 16342 16494 17893 18741 26621 23765 18014 24213 27226 16135 18943
2673 7780 11502 24325 6187 12149 30916 11510 6225 30917 12933 31201 26095
2674 20076 22487 13747 18500 19314
2675 9822 9838 4339 23296 15669
2676 34406 14668 13412 33196 37845
2677 11636 10969 15685 5601 26440 13319 6508 11094 35641 35282 19141 24688 11510 19156 31108 10247 21165 6531 23566 26663 6477 9323 13485 34426 1039 15237 4160 37808 14312
2678 9084 24976 16190 15862
2679 2718 2926 4330 7130 1532 8404 8
2680 27281 25087 33913 35330 28531 28166 24490 4000 35503 27662 23873 16178 23662 20162 13642 23668 717 16105 35030 879 35254 33457
2681 17661 5199 15127 15241 1612 2354
2682 7488 7490 10720 4663 22447 28155 31667 13183 3378 2304 25666
2683 24135 6415 1378 21311 13225 20401 16584 7126 17110 9464
2684 7187 37086 33547 1513 14822
2685 4497 2806 4102 1247 11754 7986
2686 17895 21618 24722 16139 871 29751 31072 18183 16890 16903 19088 19121 16068 21519 16007 16014 15959 20005 16194 23042 16822 28053 21286 22683 13529 27273 17897 16783 887 10223 20850 24931 14276 16241 23019 18526 31196 36685 19190 20118 21664 7372 23172 16240 19882 10736
2687 3383 2754 1631 1038 22531 3224 2478 13892 12397 13874 23941 11620 9822 1336 11979 24694 14690 14767 3138 19898 17296 11992 12932 11586
2688 18738 17012 24123 16652 23167 17897 23023 15998 16835 10986 22536 24214 18475 24125 21519 16258 18556 887 16684 16274 18517 16280 29728
2689 5457 9199 20076 33806 14391 6538 35793
2690 10797 15505 786 25323 6384
2691 4608 2618 10775 11619 4160 2099 2974 4667
2692 16005 21584 16593 21678 16058
2693 22022 10859 2548 11884 19141 6504
2694 14454 10506 5024 93 35426 6049
2695 1482 769 4979 1682 6715
2696 21686 3352 4984 1351
2697 7428 20510 4509 4936 15 15630 10062 33594 28917 35644 5885 11142 8281
2698 9811 33159 26700 2433 20036 25620 12324 1203 6560 30720 2124 12508 23150 7206 10352 6403 31310 35744 5362 6943 23041 5530 26112 5103 4205 15271 20040 6531 21223 5623 35283 19277 6215 19227 2090 32024 31906 20169 6695 2050 26113 6677 15586 6474 32020 9343 10353 36597 26227 20033 34879 6545 7353 826 5285 25461 31312 6408 30313 31271 36866 6554 37417 7790 32031 6544 4634 1590 8234 12363 32019 28043
2699 4531 22241 24906 17231 17557 4534 2054 1584 5480 13719 36414 7116 11645 13471 7128 11325 6543 12003 1066 25131 22670 13777 13744 11498 6551 6431 1492 2236 5363 12717 15306 12407 1397 9822 8792 2098 8849 2422 1515 1193 8785 2604 12878 1164 1702 10139 23569 19223 1386 16586 929 6702 6500 6421 15340 24363 10878 12593 11663 15682
2700 9456 7760 31180 35359 1397 11505
2701 9583 11323 30158 846 14369 13246 9285 20398
2702 12978 4304 1025 12174
2703 27334 24816 3845 25222 16663
2704 15406 20128 9132 19649 20130 4501 37045
2705 17645 15094 13026 11241 14957
2706 1389 1453 6103 1481 1484 1329 16935
2707 26163 22867 13920 22171 2353 20443
2708 96 785 8656 1529 794 842
2709 32812 30091 15608 7849 32834 9873 18677 22185 33138 36314 25542 37860
2710 9474 2020 15998 2698 20840 21670 3255 27318
2711 1353 11298 1346 10723 2902 3605 648 10777 710 3126 14114 14270
2712 25138 799 4873 30036 33588 11101 1397 4343 30370 29682 18132 4398 1642 33992 32636 1604 25137 4667 30121 1046 33316 13866 13311 22427 31743 17681 780 18431 31274 1378 22204 5257 2596 33707 30591 20716 15658 20169 25139 36588 2606 1042 4402 30527 1422 2534 30052 15666 15754 3645 30592 768 7511 35179 36514 20074 15672 13318 11966 2163 7769 1165 2224 35802 923 23296 26093 10649 28725 4955 13443 13774 17861 12978 22198 2023 14397 4502 8752 35201 35420 7634 34378 30377 35527 17341 11967 15682 15679 14807 13319 7194 911 1640 5001 6666 20418 17342 26836 25356 1067 15663 7638 11961 12593 37061 37629 34671 37565 7341 9681 31915 19127 10786 2917 1047 31593 30593 12595 30834 6410 14974 35860 37237 36535 23293 35308 28721 1837 34114 35083 4513 14664 2462 30294 12496 2064 7355 1142 11963 25279 16790 25178 14948 20399 35392 31786 20510 3317 4505 19716 12897 8436 1529 13315 15516 33583 868 14364 3300 36045 5381 2709 3490 28056 37845 31269 37968 8946 1062 33196 37115 1190 34118 7002 31688 37789 1105 37426 33584 34958 37931 37733 37807 37720 17650 3050 891 3425 7499 13483 31179 38035 6636 37817 3726 34418 1034 36993 37261 35543 37844 37461 37549 5599 38011 35892 37843 37980 1901 15687 7211 15677 35309 37621 38016 29346 14794 37336 37097 2365 4183 1460 4543
2713 9904 2191 10711 8963 6242 14718
2714 1518 1104 10641 1502
2715 17519 1173 28783 2216 2257 4035 8184 2087 1624 7045 4608 9019 8540 1799 3372 2188 2161 26388 7765 9461 4603 5483 11853 1048 11027 11676 32604 13854 2973 10899 25090 2414 3335 2358 2146 13760 11952 14812 2287 16453 7005 3287 17236 2058 2123 10100 13691 9651 8824 1245 8793 1925 22024 1075 1526 1971 21688 1805 8849 1036 13443 12930 5381 31637
2716 6430 11510 10133 1397 8267 13763 2295 2579 918 9838 2163 7623 13752 1130 6487 33816 31857 6534
2717 13750 6442 10591 2632 6647 30876 8534 28797 15749 18432 11956 37817 1073 37806 37621 38011 1380 4334
2718 2693 29253 721 8086 8604 3970 18883 18544 20918 4000 18873 23381 23819 26235 17771
2719 26771 221 26411 13103 30080 21434 26773 26779 31944 542 1618 26780 34214 34090 4886 21973 34285 28032 8072 21450 5524 26412 21806 36169 33582 9914 17058 34218 22827 30048 465 24193 6456 5031 37076 36170 29577 36167 35867 7177 37085 26416 34582 37999 15540 22970 30229 21565 20873 29576
2720 25528 4786 14871 20159 27247 13529 21740 17897 17829 16831 34318 23339 19190 35446 23968
2721 7845 11142 7835 5899 10303
2722 75 5153 868 4511 8697 773 13035 24558
2723 7204 6433 1449 7995 9786
2724 3069 13 11245 24717 6926 5374 10388 674 4237 11300 4979 3142 18103
2725 792 10816 2168 6203 19652 14569
2726 8404 2898 5854 8328 2181
2727 2458 2257 5018 2803 4328 19162
2728 35271 35074 33059 27448
2729 2902 14341 5869 9368 7652 1018 3518 7658 8329 25965
2730 25739 5404 8567 18211 14069 26251 11926 18239 21318
2731 24579 22783 21409 7955 6060 12116 15475 14439 772 15052 10500 34309 768 28966 8529 28915 32610 32139 13673 776 34672 868 15481 26836 18674 36792 7938 26015 2779 31713 795 24561 35207 24395 16618 26014 30520 2772 5175 21410 30758 32140 22782 26016 36004 35949 36884 26012 33560 11732 8693 5685 4502 22412 2756 37370 34934 2734 13035 37945 690 26310 36641 2723
2732 15122 15339 7509 8385
2733 9991 6287 13923 8702 1010 17339
2734 25122 24515 18348 19259 36987
2735 11554 4111 4047 3407 28343 8129 4988 28858
2736 11649 1716 2806 1685 2765
2737 16720 26553 24217 23178 24085 20890 30799 25285 17894 24926 19754 15619 25852 16267 17587 17494 3173 31231 27558 16242 20348 20164 15221 23277 32067 25632 26436 23699 3190 16357 24833 20874 284 257 21926 21902 240 35631 300 31233 25100 30802 149 269 20512 29821 26265 29818 17958 33440 24139 19373 33139 26124 17950 17945 12781 25839 32750 26085 30956 17460 19387 29831 17469 20520 17947 34242 23873 15211 23260 3918 17959 23211 24667 17953 25093 32227 9799 36785 25694 23274 19985 25690 17967 17364 20313 15230 32572 19753 25636 15231 26669 28855 36074 19471
2738 10191 26056 3050 2914 4589 659 6653 7126 14468 13804 14798 15173 19895 665 11120 24300 20537 33548 6661 28719 35944
2739 5044 13028 13041 31587 25489 12627 11808 21341
2740 3437 35555 2645 5901 18233 29380 28426
2741 2939 22426 2902 4557 3355 18387
2742 3605 75 3518 2734 25968
2743 15191 9059 31523 21913 16188 23590
2744 7313 4501 12330 28950 29278 14433 31808 10463 14429 24452 9139 5396 28099 9277 37051 5323 19690 19271 5326 5024 31756 36809 10484 32610 27835 34934 30464 11401 8412
2745 11411 4331 1541 4727 2942 2926 4864 2936
2746 608 17093 618 558
2747 26836 3793 2748 19716 31494
2748 28422 5350 11801 6379
2749 847 3056 16446 5684 29694 33170 6779 33156 15695 28961 25051 10371 7807 6877 31780 10651 4930 24094 6016 4955 16362 9111 13440 4242 30884 22265 26215 4939 6132 33897 21823 7955 27968 811 11804 36596 10420 11376 91 28758 10458 4945 31027 666 5383 33671 29966 17190 18975 4954 23497 33083 8700 6059 8692 23686 10499
2750 16835 23381 23362 23313 20843 17276 21273 24078 18294 23168 18933 26956 20232 23327 18944 22500 25221 26848
2751 13477 13482 31758 5396 29881 6611
2752 2806 3245 9501 3490 773 8436 8649 4301 26814
2753 7910 10900 2416 18662 2283 1910 7759 7490 8858 7635 1257 8759 4456 2440 6092 5480 25135 2345 8790 8764 26662 8763 17254 4369 8774 2342 2972 9743 24684
2754 96 760 7239 814 6659 9238 2015 4384 2365 22548 3754 852 8752 8629
2755 8232 812 2897 9985 9012 36182 13190 87 23450 2936 3045 774 2712 24449 8669
2756 5463 1910 12070 5603 22667
2757 13077 7047 1190 10133 8959
2758 6046 2015 3787 715 3517 8305 7227 5356 14538 5284 14446 2014 743
2759 11918 1250 7274 1797 908 1109
2760 8693 11635 5694 19271 11409 11636 10463 10484 12943 12911 13023 9580 6840 5395 6659 13030 15474 31530 12329 13033 35736 35695 15457 28908 4509 13036 10475 9197 21146
2761 10933 4963 93 774 13715 1441 7155
2762 1258 2196 8845 11540 36145 4662 2603 6433 782 1189 34559 10133 11956 2111 7635 37497 7631 13287 9006 5589 24353 24391
2763 25648 8565 7759 15249 15927 11587
2764 18776 28433 2295 26661 892 15951 20538
2765 3323 4330 2828 5232 6753 16226
2766 17897 24785 2697 23650 11449 2695
2767 5350 706 17 649 1003
2768 852 5319 4503 12904 9986 790 3651 795 7261
2769 12196 566 5168 1672 29266 590 12169 557 19041 587 10303 3811 746 748 29782 19882 16655 21677 18445 13436 16063 27673 23963 3189 16515 34280 1772 10010
2770 18913 30549 17850 17328 14641 33266
2771 4038 20307 20599 2559 30126 2414 8814 31844 2279 1970
2772 17493 32572 19394 33139 26203 17370 33515 23271 17951
2773 11599 8798 12681 9016 3286 4028 7921 1818 33939 1166 2705 13492 8858 6957 11688 7899 8859 11611 9019 7487 33422 8805 16950 24633 12927 3717 10947 7092 15153 5517 30027 33584 25563 8769 30843
2774 661 37122 30047 24034 32623 30046
2775 2706 4500 1001 6653 21623 5002 28720 3259 2791 9989 5340 8427 3479 29208 1253
2776 12467 164 24928 9916 10758 8431 31250 17666 275 169 5986 7935 5923 48 6005 5978 5920 430 30493 15357 15751 300 18694 12129 15531 20409 9968 459 10630 5941 26029 65 25980 4591 318 5928 15546 4594 4826 14988 57
2777 568 6066 3473 6064 4687 841 5307 20549 10010 12959 4729
2778 1517 1455 6523 13407 21308 24351 33525 10871 4663 10143
2779 12 2784 2819 650 797 1826
2780 30139 6925 2891 5373 5671 18055 26294 6626 5272 24639
2781 6841 16744 7488 4415 10858 28754 20272
2782 14850 13558 4237 843 3686 3628 34104 11729 17177 28709 30156 7815 12621 36070 30928 7955 14679 8285 6743 28049 20398 10219 5680 33629 33696 34100 10241 4968 12331 35385 2896 37349 19709 5399
2783 4313 710 785 8171 2749 706 12
2784 7427 31431 28720 5380 18761 7613
2785 2632 6496 7123 5485 7167 1558 5484 7150 9702 10765 7759 2141 2782 5147 649 774 790 9499 1025 6419 2039 8247 6393 9400 9052 13384 2941 3483 5018 8287 9989 18153
2786 6306 1193 1038 891 814
2787 19784 30539 25881 35612 16137 34049 17442 23077 16510 31176 17819
2788 9834 1893 9761 2219 6615 20169 2741 2724 1529 7545 3490 706 17916 3645 16 25054 2794 15707 770 1531
2789 18918 23705 29198 15976 20955 30211 15981 31475 20688 16778
2790 715 2964 711 7984 7545 6057 87 13019 8433
2791 23529 10185 31659 20606 8569 27788 28565 19924 9406 32814 10156 20608 37126 23531 25442 13330 6301 636 754 35555 28295 31775 36305
2792 23294 15343 1988 9764 35837 37009 7492 19178 17746 8896
2793 1718 1034 15151 1215 6188 8714 1026
2794 3397 3403 15390 5162 9485 581 20424 5289 28343
2795 9775 3261 2593 1720 1038 1037 2822 7506
2796 12241 20977 13337 33134 11216 28547 27322 4772 19256 20765 21566 16204 16049 25204 20948 15598 16329 28806 11656 19258 2813 12313 29841 7545 2775 3683 14862 88 30137 16188 22440 7597 16050 16791 33829 16492 32316 717 18713 20940 13285 21666 4010 16194 16686 18986 29606 26955 11107 16703 35039 36132 36062 17276 28119 17303 19774 16700 23967 25719 16121 24573 29537 32722 37748 32962 36410 22465 2698 16197
2797 783 669 4995 768 2706 4511 7881 31506
2798 22649 23354 20552 7899 8252 24686 35671 26921 31562 15500 13754
2799 15589 31264 18359 10775 1499 2330 3339 9454 6429 22238 2134 815 11520 25620 1422 9333 10954 2165 1253 9822 6479 31268 10944 1515 8827 20274
2800 12780 786 4293 11003 2766 13790
2801 15655 555 26387 37881 7638 1114
2802 955 14069 14495 18208 14004 22629 5443 7736 15890 22345 14046 13326 14493 970
2803 6146 6384 13280 737 1548 87 25035 7978 3490 7335 73 14371
2804 3316 18949 21243 23383 23266 16237 11540 1050 2527 20716 1256 12679
2805 8318 3771 3614 4280 30335 4508 10614 2963 9171 8334 24880 11636
2806 1378 799 6215 7501 4530 3379 7822 12855 4449 3301 1374 23596 2461 1524 12880 10634 5096 5363 9818 2109 2224 8376 9838 11510 1525 7509 4621 2481 17240 7273 24337 734 12346 1830 5465 9822 2397 2478 17328 37697 17756 18837 1011 1029
2807 9835 4369 6228 1256 23535
2808 4497 786 2786 811 7425
2809 25592 24451 35206 28008 19470 10488 15447 7432
2810 6577 2106 15661 19311 20790
2811 36676 12175 4852 21327 12848
2812 14170 18089 9542 2853 28982 11059 14942 7587 36595 15456 24459 18171 6931 7873 7870 33608 19865 6952 16252 1017
2813 1084 1646 1090 6166 6625 7153 13
2814 9575 13265 33057 7316 1710 743 3506 5662 7428 2709 4911 31745 21527 19843 33491 12830 35159 11053
2815 3561 15755 92 0 1683 3245 5677 8287 945 3396
2816 703 81 2949 812 3083 5012 3806 3495 649 2770 69
2817 12055 2171 7759 2071 2032 12925 10356 16416 2154 1191 7292 2135 10133
2818 3667 3789 11433 26161 10569
2819 5389 35750 15413 4305
2820 20885 19256 21669 21674 5071 24838 10736 17897 26456 17442 29183 34001 33203 32393 16512
2821 23744 4971 28789 7349 19595 12639 21694 10614 33251 5342 33284 12624
2822 14346 12832 34462 13263 17632 24862 22434 12989 13688 6166
2823 26706 17882 3894 28174 31739
2824 4162 3130 2637 2715 2706
2825 2279 11227 24691 9467 899
2826 4353 7389 1247 6170 1646 1138 904 2916 13292 4403 1785 2559 7469 6221 909 4648 5467 6229 1089 5225 11739 1090 11101
2827 28361 24309 12242 20612 26367
2828 16729 24821 27230 25851 31792 27295 27048 27376 16565 16018 16692 21678 20972 33501 17013 30889
2829 2321 7491 22872 21261 11962 6216 14420 9227 35890 15834 9629 9834 12878 11505 26936 12364
2830 8767 20859 19535 1011 33944 32955 15 5319 9335 1025 7453 657 31182 1003 7927 636 13349 20349
2831 31597 5747 13860 1328 2124
2832 5074 7879 7147 13683 10074 3063 7431 5024 27966 14385
2833 24641 15563 3647 4971 2863 2873 3788
2834 12947 7664 11269 8504 21253 3125
2835 18038 18461 23693 16712 16953 21126 16856 10284 15963 3906 16683
2836 9975 15 9892 10208 11290 30453 9266 2725 7130 12330 88 12116 3255 786 4326 20510 2182 649 1002 15481 9989 35822 15454 1540 20400
2837 22593 4654 10660 8813 4477 15111 15265
2838 33644 31964 19487 29930 31963 25724
2839 11224 8966 9264 20628 10234 4938 18367 28004
2840 3227 5776 13174 10786 4843
2841 6837 3596 2835 16614 24602 21195
2842 24120 16827 24311 18127 23663 18948
2843 8281 7658 4316 2742 12679 3804
2844 5173 14665 33320 18367 18363 21407 32452
2845 28578 9439 5814 7287 3336 26929 9761 9057 11365 9441
2846 1498 2104 3 768 6614 11831 9985
2847 1721 6465 1661 25620 20307 14637 19224 10090 13851 14456 11978 20532 25616 24852 7627 1259 18001 1134 31280 11860 33150
2848 25065 21411 27300 26456 34180 5249 7371 34581
2849 32388 5474 7165 15667 17291 17513 2091 4670 13304 20566 4190 17205 35787 22426 1617 33425 33584 31002 29589 6619 11098
2850 23418 32086 35959 31392 17505
2851 27240 26526 18732 18551 16817 24122 19116 21129 20420 30212 21670 17010 16842 18989 16809 18937 24548
2852 31537 10172 21081 33594 32846
2853 7805 3521 34512 37245 12830
2854 9574 2902 4506 1826 10730
2855 12017 21747 8320 11374 14643 25059 22165 14397 9580 2860 25054 16623 14396 18366 14949 28004 4981 15473 5396 10460 29351 846 30994 24003 10468 14435 2809 5022 5398 30704 5358 14432 10481 14378 2733 20628 17150 14966 10505 15465 10613 10482 2017 10607 8697 15444 21147 8171 15474 10406 10465 16617 30995 5378 28976 14408 6044 14412 9557 8756 5387 14428 14521 23950 14319 5339 26308 4279 25034 36792 14678 14350 22781 9988 13609 29946 29353 15052 14407 14535 23916 9291 9285 13025 8396 10752 14442 4280 14383 14439 15436 14454 5323 13019 10491 15446 9284 14415 32610 22411 14453 12330 12638 29993 26572 15450 26369 17921 31189 12911 10496 26075 24450 24458 25861 29053 20195 29051 28914 28915 15055 30460 5401 24464 3811 14443 2791 20416 28015 8649 11005 24460 28950 15468 7642 27799 19626 9214 12830 9565 762
2856 19891 14718 20447 23187 2255 11592 14577 1704 22695 20537 9902
2857 762 2168 35667 8328 710 17913 8626
2858 4274 797 13265 10076 34440 3076 36451
2859 5269 9580 1262 10247 31216 3568 6215 5477
2860 19470 7245 21405 3593 15492 17149 26073 32932 8012
2861 14805 8488 7400 8931 2141 9910 28055 14728 8948 5776 2044 1981 1084 2066 32009 14730 2090 5107 8903 35640 22865 13931 26928 14783 5744
2862 11511 6563 7062 8844 20681 30843
2863 1406 10643 23596 1037 4181 1166 17393 1031 13892 23782 15798 2163 1898 6408 1506 19872 10859 4191 6247 6470
2864 19572 13015 703 10195 10108 13511 24592 8976 21839 5057 7227 3661 22222 3771 3057 7715 22272 6063 10508 10614 1853 14212 2858 19603 8750 5393 3789 9569 20726 27937 7335
2865 9551 1130 1361 4015 1478 1492 7570 2458 15644 10969
2866 2731 9139 30067 3291 14438 10377
2867 11576 3725 1478 9471 10880 1244 1515
2868 1995 3343 1199 1884 12763 1810
2869 10752 5012 14366 13337 15332 4685 20828 13
2870 1380 8565 22021 7188 1324 905 7195 7775 1810 4655 1039 781 13639 661 2036 10717 10002 1245 1240 3703 10638 9794 12123 1053 1149 3379 1398 1457 15747 1658 1249 7780 4224 4352 1037 9825 9768 7353 1174 1256 2523 2043 4463 16586 1513
2871 20342 22760 3317 8750 2944 88 5383 19708 4497 3076 773 25138
2872 13082 29746 24198 20209 31040 23675 16102
2873 9459 14760 2436 30105 930 11988 32030 20529 1212 2058 9899 1084 23153 18049 2563 9454 8810 1981 25135
2874 10903 1240 12925 5362 30956 1579 19473 29680 34237 35445
2875 9213 10371 30977 4970 9283 11807 13793
2876 2877 3574 8649 1555 11353 2365 9501 4860 7428 8829 6841 9989 36493 5485 3050 20240
2877 33899 30457 19592 35976 21258 37085 32606
2878 1718 20567 6649 3083 8148 11245 87 693 4590 4314
2879 13461 13411 15639 1803 30163 29499
2880 32536 27919 27739 25717 18715 30857 32051 30445 32305 21673 26755 34643 27471 37507 27870 35758 21420 30580 27174 24887 16256
2881 1556 5485 1043 5473 1163 1810 12061 1158 31172 8791 10130 15627 7175 12042 2219 24331 8649 23354 26656 36863 28329 34563 30040
2882 23799 6351 750 6374 13337
2883 2567 10931 12151 910 11853 4555 2279 10972 5781 1248
2884 26328 12327 3577 8058 1629
2885 19417 23207 26436 25045 19080 1540 11056 7261 25046 768 30294 7510 26674 25170
2886 2885 32610 6053 4380 5270 2782 8399 14937 2897 1017
2887 4222 1580 1155 4297 6982 1870
2888 1264 6433 17290 3715 34138 1893 4186 15685 22424 10946 15303 7420
2889 16797 20676 16905 18943
2890 2426 1701 2198 25265 2354
2891 2342 8830 11083 30952 7098
2892 7822 1033 1112 1373 2222 20182 6 1068 1480 8921 7195 1138 2141 1320 5763 1090 1111 10654 1327
2893 12825 2754 18174 22049 2807 19707 10736 24185 26729 16875 19263 27498 3584 33003 3574 15456 24459
2894 11807 5357 2020 6151 4305 716 3754 3300 6719 22118 3064 14567 33350 3781 3075 3617 5019 694 17598 9240 6960 3516 7896 5278 9283 5232 4801 12889 21838 7873 9151 786 9113 23508 31880 5057 3638 766 25048 10197 2892 3051 9247 769 6763 11245 6900 29365 12936 4911 6729 11430 4938 5354 15 3806
2895 7387 23592 24520 24084 25991 30862
2896 13638 2646 24743 5883 10002 8165 15037 4826 714 762
2897 9822 7501 7697 22593 8355 1056 7570 8242 13485 12695 1810 2226 13832 24323 17537 18536 1971 25090 23944 4666 15644 13857 15629 1526 5143 9614 2218 36643 5377 12363 1053 17650 7488 1527 26224 10931 9466 6992 13318 37650 15680 12763
2898 6499 8861 11511 903 22029 802 20601 9704 4015 2678 8860 18856 5473 14589 7126 31840 10 22427 6619 7077 30591 1246 14668 24676 25092 17654 4021 30738 8267 24373 15135 1156 1855 2803 13378
2899 8278 3570 37985 29053 35357
2900 768 2742 2893 2902 3479 7357
2901 9501 688 657 11 852 7573 19709
2902 5062 3802 3545 5845 788 4936 3651 2014 3783 3680 3603 2867 88 5020 795 3628 4962 773 1015 2780 37918 19526 34930 6659 2939
2903 11954 7117 25929 6456 15103 25677
2904 748 3201 31923 12560 9047
2905 6637 6641 563 19044 592 33741 35319
2906 4418 2351 26058 2360 31127 22423
2907 27026 21374 35530 5026 15139 24719 684 8695 10862 852 1682 32718 32714 20295 18370 1027 36694 8690 15482 30223 3127 24769 20153 22370 29028 8692
2908 1025 18790 35890 5023 2737 8693 5020 13014 8752 30520
2909 14919 731 4504 3817
2910 13094 7934 37395 31665 28724 30376
2911 13771 8693 23501 24884 14396 4280 24998 13039 30996 13282 20748 5378 9291 32691 5395 10507 23950 15473 14195 31750 37572 30520 25054 31877 8012 37045
2912 2820 2014 5151 7830 1685
2913 4441 4646 5206 1635 5635 1585 13121 9684 10900 32320 8721
2914 15334 22438 1128 15635 17254 20076 15669 6087 35193 7631 30592 8839
2915 5020 3245 35294 3651 33253 4939 10801 3497 3312 37364 2637
2916 2765 1543 3616 743 980
2917 7386 16101 21519 3315 16099 16974 18550 16952 18039 16903 870 16905 3179
2918 4118 1803 12028 13162 32888 8193
2919 10979 22088 1136 12485 9379 24947 27793 24283 31163
2920 9480 1056 14798 12151
2921 18748 18744 3996 30012 23109 33922
2922 3280 2811 33322 3055 21575 1255 20240
2923 32364 6430 27025 2579 13307 12144 7630
2924 6433 9734 1810 1398 11327 1518 9819 926 7501 4467 7354 1519 9838 11516 8376 1264 1487 15644 1387 13744 924 13715 7630 11966 1427 4528
2925 2147 782 7354 4654 4426 8385 15158 5141 8192 9380
2926 1409 1156 15660 13750 2136 14974 6534 2025 3732 1155 7626 4664 1055 29500 32926 13403 33597 13830 25137 7766 36145 1069 20704 25138 4463 5084 1068 7211 22429 6635 1152 1429 12647 4388 24380 2189 3709 20507 6492 6431 24373 8752 9838 6531 5463 10138 12074 1130 11505 4654 927 6551 35083 9800 25809 4541 1067 6103 11661 12878 2335 24352 8858 12346 6490 23153 2718 2054
2927 1189 2333 6531 6 8843 23131 13480
2928 654 765 1015 1089 11732 2725
2929 12494 1038 4548 26420 2220 1641
2930 18732 34292 29260 17797 17836 16843
2931 4621 10643 1385 1913 3702
2932 11495 17230 24326 24321 11660
2933 2543 36190 20552 4125 1805 2628
2934 1540 9501 3667 3529 727 13790 722 3083 8971 6926
2935 4779 16256 18196 15961 22659 23378
2936 28367 9303 6590 5027 6305 35636 5877
2937 18718 17978 28260 23046 27555 21243 28670 35404 31331 35651 27122 33868 11453
2938 457 12649 12319 21563 13152
2939 8709 8195 20077 15103 6403
2940 33056 25670 33584 7827 24687 4453 35789 37817 3218 30183 1057 11965 35389 37098 19127
2941 6351 23530 5901 11697 10153 35806 34081 19250 13639 15778
2942 11712 15079 5536 2162 20280 13797 15644 2388 922 6534 2109
2943 1048 3 1246 3287 12279 8538
2944 16884 16835 22253 22455 17592 18721 23323 23694
2945 8433 852 762 9989 26555 22771 648 20400 19844 770 4502 1136 24579
2946 5137 19134 13229 26794 32488 3737 17429 1246 24103 10331 14379 6049 17145 36330 16617 15433 35717 35426 35326 7953 24388 2374 13208 8845 34072 13745
2947 7620 31127 9826 2317
2948 7164 2953 714 8018 13683 7233 2725 87
2949 2137 1894 14739 6433 25888 13490 8747
2950 1245 34306 35064 20401
2951 9904 17537 23145 3294 1639 3372 1854
2952 2895 7242 12978 5685 1256 13503 22987 20586 10752
2953 1163 4432 5518 1412 5215 20272
2954 24096 12815 11138 6592 10120 6301 32463 30847 17267 8516 20732 4066 9406 6362
2955 32448 3568 8681 33308 36691 30518
2956 6328 8477 1916 3275 1513 3724 2098 14721
2957 2494 15311 8733 22427 23296 11961 11501 38011
2958 13962 23716 19238 37126 27781
2959 11913 2293 12010 15175 11886 16466
2960 21730 126 112 6004 282
2961 2416 8178 15746 8475 34365 33507 19895 2552 29721 33769 32182 13857 26008 32092 16948 12346 8184 2387 1827 23127
2962 15043 32157 460 14700 36523 6278 34198
2963 468 20599 479 34244 7115
2964 15346 1256 5 3372 8197 4661 6
2965 7591 24456 675 8038 9153 7428 3200
2966 25980 300 9621 694 7259 7211
2967 25028 1526 5776 2317 20073 11511 2481 26151 6471 6500 1506 2478 7483 8719 1397 930 2471 11983 25795 5753 2278 4372 5465 10142 20302 11980 11605 13905 2219 2586
2968 14925 9979 28377 3628 14192 14328 7864 5024 10410 13018
2969 31853 12179 1310 27876 20228 35009 7529 19047 22652 619 35681
2970 20942 17255 30535 13527 19190 24556 17902
2971 22871 8188 23597 1553 1949 1195 2593 4453 2551 4190 15945 6619
2972 21286 16122 24738 20098 3840 29490 15932 25891 16822 19494 18481 16314 23470 15967 25276 37637 32055 37467
2973 783 2803 4500 2737 9501 3788 1018
2974 7699 4406 7043 11597 20537 6263 1837 9396 22765 11397 15826 18338
2975 27222 24116 18286 26108 20776 16262 22508 3850 23358 20918 20757 16132 18876 23973 16854 16287 28484
2976 3411 15390 20783 21588 4039 945 3405
2977 11397 25011 6043 3512 15434 4963 3817 34938 7658 14206 13033 5856 11636 24639 15439 16447 10463
2978 18376 21336 9058 13390 18386 29028
2979 6564 1381 774 1032 11960 18856 17246 17290 23354 13866 1896 19944 3741 24682
2980 18012 13436 20856 17255 21665 18186 27219 16528
2981 29168 23117 20971 31636 32768
2982 10533 11928 20644 14501 20640 1753
2983 8385 2272 12580 11844 2370 2500 9818 24942
2984 6249 894 10659 7907
2985 2781 11 15 4936 2964 2745
2986 33253 93 27477 770 15413
2987 11775 640 13975 1756 14048 3102 18222 15852 13152 13971 11933 8506 14073 2703 14092 3126 1762 7732 18304 15165 14021 5429 22343 11787 11640 14109 1796 14065 1819 14155 14450
2988 23225 11056 2706 1826 16226
2989 9826 3130 19846 12679 7262
2990 35787 26183 8928 1970 16585 29682 12146 33196 4257 31690 7070 37357 33584 8834 37799 36528 28041 32060 6211 1956 2542 12694 10900 37915
2991 7297 2158 11870 20040 13 1422 2312 2044 36728 9903 2258 2229 2138 13847 12046 10949 6220 6211 11839 2466
2992 7945 1944 28056 16585 9745 659 11603 26137 14808 24755 14279 36535 2542 1072 1553 1094 31691 10900 7174 28856 7907 3839 1078 1700 20406 2147 2160 12855 5480 2348 34563 30105 20682 902 26440 20554 2613 20442 9319
2993 8702 16936 16141 21398 16384 5383
2994 13754 7631 15722 13740 13747 19707
2995 8541 8592 16374 9668 8359 2257 1496
2996 35398 24457 8651 35840 9989
2997 2786 2902 9013 9501
2998 4111 13170 8810 22469 29091
2999 26217 8558 20443 20809 11975 9425
3000 4893 7774 32171 37461 1325
3001 29392 15274 11661 11966 1157 2533 11495 15660 15669 7 4140 20754 18431 11547
3002 4181 799 4394 1316 6211 7571 17341
3003 12198 23999 1311 839 9083 8058 28311 8010 591 37937 4686 29062 4853
3004 7948 23292 790 21827 776 9244 9986 2779 30515 6151 34613 10482 21625 2718 14364 8665 15701 10821 22781 24456 4233 27890 30240 9285 29484 3695 5012 6661 2942 29991
3005 7502 5477 7627 15684 3294 7179 2206 4399 1558 6497 1565 1515 7630 1134 6500 8850 15277 6636 10856 2527 15664 13906 2259 1482
3006 22944 14250 34377 1360 8089 18213 1776 10984 14039 31009 4590 36136 31538 23793 18142 12284 3119 11926 23925
3007 2015 7838 5030 25535 7150
3008 2554 7126 8860 7635 20307 6192 18777 10246 2028 24359 8778 1084 15154 18001 10685 5596 18434 35193 30249 2221 20221 8773 10950 5480 25356 9800 4283 14775 4654 34382 33584 30378 32081 6306 6647 2481 33072
3009 14404 5378 8412 5175 5868 32139
3010 17489 17737 16235 23701 16701 18461 19437 29832 17347 36283 19454
3011 25505 877 26195 16790 20963 37012 37500
3012 15448 34145 20628 19230
3013 13146 26019 8497 15857 3112 15877 18145 1777 24145 1282 10530 2675 5444 18245 18243 15866 22644 22334 7758
3014 14033 35506 22639 14017 11928 34607
3015 23553 10132 23549 16461 1970 7489 6417 14456 1157 5254 11499 11978 14974 1193 11510 11505 26152 1478 1142 16463 1104 24274 15586 32016 4654 11540 6433 1524 1256 24103 900 8824 15103 23354 2541 31454 34557 12642 29479 15682 32269
3016 7791 15724 13625 1134 11011 22041
3017 8272 22260 10244 2704 11876 7191 9450 4394 12057 4257 5514 13812 3294 2009 2255 30369 2506 11501 8373 1245 7501 7502 7401 25139
3018 31779 3259 12 12826 8753 4314 3495 2877 4963 8649 8667 12783 8669 8750
3019 17341 9838 2575 7627 30592 14717 7635
3020 18744 16042 7387 18188 18988 35977 30264
3021 14024 441 516 4748 341 487 3000 26353 34384
3022 885 16034 16679 22248 16967 774
3023 16445 5868 11384 1934 6135
3024 1893 31578 22883 15064 6601
3025 1905 13 7210 4157 6392
3026 4500 3584 11228 826 9153 2168
3027 5227 4661 4172 11547 13750 13747 13780 34563
3028 25534 33955 9874 32357 6311 967 31206 35133 22189 6334 10184 19822 31873 31862 10264 13356 36945 6303 12228 13341 35839 9305 35617 4070 12288 14449 28423 16393 20505 17509 10116 37680 24567 5030 15765 20611 27845 22635
3029 12986 2804 17913 15140 12327
3030 25975 16833 19186 31371 16310
3031 4130 2050 4032 1509
3032 4632 20480 799 17300 4 15947 2523 6676 12151 7037 6248 11988 1442 11980 11879 14823 14469 32687 8839
3033 8850 11094 13316 36867 17341 4328 28328 34876
3034 11521 893 24647 10005
3035 10886 14391 12901 5383 28949 29447 8752 10468 13770 21835 28961 9557 5054 22074 32191 5380 33559
3036 2939 11894 18157 17627 2017 33503 10753
3037 7491 6455 37686 35744 1110 13867
3038 26421 5271 10481 21745 9139
3039 4588 32046 9472 7916 9831 8852 1902 13866 19872 35377
3040 7689 25611 32158 10546 8107 34065 1765 22364
3041 15749 2064 5482 13299 4144 922 1330 11879 6433
3042 12344 1402 17656 1525 1245 9838 6551 9061 20320 11661 37806
3043 6144 12825 785 722 8333 15460 29119 26013 9892 736 33276 5492 8672 11119 2964 32172 21867 1621 7635 13482 10488 657 2798 35949
3044 15472 5326 28915 23501 36468
3045 10941 7000 13173 1036 11231
3046 574 5298 570 32405 10007 35546
3047 2551 14691 2564 5323 10248 14803 29161 6696 2915 18662 35388 29801
3048 9172 15457 35024 19688 17641 37358 6798 34101 6770 30700 786 88 23571 15521 23780 7335 14435 33191
3049 4339 1044 9702 1078 2593
3050 28405 14646 10048 7640 11024 19663 31559 6355 7335 21098 12215 21100 28547 17157 3761 37203
3051 8845 799 8244 28784 1256 1244 4032 1114 13747 15667 13288 2028 6565 1067 6457 6508 2559 3231
3052 3626 5342 33680 2641 22766 36015 30329 21225 4087 19580 10806
3053 15506 3245 8340 24872 21145 4505 9569 29222 11024 15439 13038 11636 7953 35341 30464 2944 31756 36639 34464 14374 19866
3054 22277 2866 14191 9484 5063 24062 8756 5323 37123 21527 0 656
3055 18506 19794 6235 8176 7284 2268 8713 11748
3056 13778 5020 11664 8946 1053 899 18589 1062 7889 6543 1499 7498 10634 2242 19915 2172 25173 1656 7631 7501 909 2196 13744 9838 11501 19735 14983 6413 7507
3057 649 7932 1001 676
3058 1130 9818 6237 10132 7167 2554 13857 9727 24334 29159 1397 1635 1797 12713 26316 7002 7942 6416 2482 29764 9822 2045 11665 15651 24351 1621 11498 3273 7500 11954 6506 11098 9820 7501 25135 7635 23893 31665 20176 2540 31857 35213 1036 2507 14668 8850 7485 2598 2541 2440 18135 24375 24363 2458 8858 32269 12593 24365 14419 5228 34199 30377 35527 24367 10900 11521 8822 23944 20538 26093 4658 34459 6190 28725 1034 9712 30376 33196 7159 38035 1527 4539 11983 11016 37426 20302
3059 25775 14276 24079 18999 7327 24081 16879 16320 16171 16503 20159 16963 4792 20004 16059 16825 16993 7366 26951 11320 30211 16505 20943 22749 23706 20946 30014 18494 9529 24082 23177 23970 16237 19265 30671 26968 33205 19882 3998 25599 34949 20091 27558
3060 29967 18737 20154 18492 26879 27149 37380 27762 22440 20839 23019 36072 26304 32555
3061 22989 22984 18073 10493 37179 3300 24639 31823
3062 20186 35603 23407 32709 30562 25152 17843 30547 33976 9074
3063 19248 22521 8109 3302 22187 3206 36310 24440 9873 33097 8114 32357 6314 24310 37178 36944 37554 36600
3064 1489 1611 9771 4257 5472 2632 9314 19124 19152 3259 18763 4366 10951
3065 1050 7111 15572 1067 1156 11535 5577 1056 33703 22240 25752
3066 6663 1324 762 2927 3490 852 2809 10274 1109 22031 8205
3067 3491 7707 18068 22134 6930 3647 14184 4953
3068 31996 3811 17144 7707 5327 7210 10462 710 9288 15054 19451
3069 9062 13137 22605 9747 5480 903 6621 32079 26199
3070 14752 20060 1329 1682 81 7190 34565
3071 4189 1321 14995 9749 929 7514
3072 5662 9153 15 3304 685 11732 760 768 1709 4497 2018 868 11006
3073 3077 2875 9104 7639 4928 2886 1534 5004 787 2638 1015 8576 3651 10569
3074 31285 19872 5100 3455 35698 6215 6476 4602 35131 12209 6439 6612 6518 5607 25758 20022 10854 32021 34669 3829 29703
3075 1070 12751 9390 2381
3076 20477 4152 12914 7517 17297 9612 23745 7752 14741
3077 15 22033 10953 981 2718 8784 2043 1247
3078 23139 31267 5012 2507 13483 19948 2448 23582 11323 2406 6531 1843
3079 1521 6549 10681 15621 15625 14299 20070
3080 9316 1185 10135 18662 8847 1333 15685
3081 2699 17661 26326 13760 14791 2471 1455
3082 28123 10513 22287 13032 6403
3083 2897 29105 3069 3245 8649 93 5236
3084 8381 18429 27019 13724 23458 6075 11501 28152
3085 19528 16049 23440 2842 762 784 2706 3309 842 7247 8341 3045 1826 8404 20946
3086 586 19043 553 19042 8139 33243
3087 30490 31217 14644 19710 35060 14539 9285 13020 3545 15445 33077 17710 35328 22985 28908 22775 13045 3317 13037 20416 31790 14660 11636 24464 28008 32034 10461 37268 9566 10481 29637 29107 13668 31167 29481 35205 2706 29993 32990 18173 19864 26015 14167 5685 14446 36107 37573 27773 31191 9201 10498
3088 31619 16291 27424 19263 20887 24311 18200
3089 25364 10668 19873 1597 8656 3831 10569 31509 4124
3090 766 8334 2858 3529 5023 14345 7120 15510 7246 5868 2964 2804 5666 26212 11636 7239 6053 15420 8690 12015 12541 13035 693 12330 19844
3091 15488 25744 10723 18230 31419 10995
3092 16160 1540 3259 21527 7428 20510 5361 15457 8433 20240 9569 3490 3245 762 12679 24459 31885 783 7429 743 9501 8341 826 14408 821 5492 31705 2889 8404 26814 2782 3600 2801 12017
3093 15130 4339 11843 2034 9683 929 1140 34522 29359 13938 11862 1894 8376
3094 1114 2632 1378 1430
3095 9521 1317 31162 10083 8994
3096 11980 14823 9459 14760 1887 3263 14740 20658 2436 7255 14754 1847
3097 816 2725 16385 2768 852
3098 1492 13301 922 1523 13780 12149 1478
3099 25393 17581 19442 21869 28877 33440 17940 2942 10193
3100 2808 773 4590 9501 8232 14331
3101 3372 6433 928 12855 10135
3102 15875 33730 22005 34865 7729 22641 14127 1775
3103 16457 8845 4486 4429 26213 32347 1263 7926 2548 1218 4603 1569 17677 25129
3104 33133 36858 36429 25252 9998 32839
3105 4032 1244 6529 1031 10363 6622 3724 10087 11672 1509 4639 6408 13879 4207 16466 27009 6391 16582 2171 10858 1073
3106 3379 1496 3739 15717 7258 5465 6421 10095
3107 4465 7772 11027 1949 1523 12925
3108 3806 847 10408 726 11288
3109 13240 9574 5845 15 10816 6878 14423 24879 23495 6715 1551 25005
3110 743 656 5014 2714 23450 773 3788 1025 13035 852 19834 1543 2805 6144 768 24460 8669 34257 13926 37087 3600 2779 27795 7263 38047 3055 8037 668 18168
3111 9997 20879 8117 6594 13328
3112 33056 4406 22390 34027 2382 5547 1996 906 16419 35193 30948 33110 1059 27771 1579 3454 1944 7042 23828 32701 12934 11577 6173 14421 28012 1548 2579 6651 24383 17229 4297 12387 13835 9380 7200 7169 1603 20716 33993 2112 4517 18338 14310 9614 7098 25928 31758 8182 11959 19736 4142 25243 1590 15067 9349 22035 7019 37176 4453 33927 1552 5086
3113 20147 8082 11475 9609 28025 26970
3114 773 3259 3490 4500
3115 7637 30891 11967 30372 12699
3116 6318 5423 3120 18275 7687 3124 14497 22632
3117 29840 9800 9751 9883 9710 7762 855 10259 5465 11583 8369
3118 10643 4170 4215 12998 1249 1520 29590 17428
3119 3129 24456 2096 12027 12596 648 710 737 6060
3120 29714 5023 30483 25474 19234 3700 9566 24645 14192 8326 16618
3121 2014 810 2909 1003 2964
3122 818 25897 669 3080 12986 707 22049 15509
3123 17880 25083 21274 3186 37012
3124 25829 23206 30959 25095 26939 34147 33998 23255 36337 13200 20513 19988 33142 25838 25837 19368 23258
3125 1134 7450 5750 1518 10691 7000 7944 12229 11583
3126 24864 6531 20076 9850 6215 25857
3127 25635 24513 23271 33329 36243
3128 28839 27865 36805 37601 28306 22465 33868 12784 18194 37912 33652 20213 31290 37927 20843 24185 31963
3129 14108 11801 22931 14076 17431 14092 11776 1774 1346 18693
3130 4503 5489 4980 6255 3418 3168 4979 7652 2944 4584 3245
3131 3379 1035 8863 18431 4015
3132 3430 3510 10110 5156 9501 10208 843 1718 2955 2179 4711
3133 1044 10781 3669 2779 774
3134 8406 21831 14406 4800 6803
3135 2908 3760 9266 1837 13035
3136 20007 3170 25291 16017 26527 13089 30708 11365
3137 14866 12603 22769 7658 10236
3138 11542 1696 12028 10350 31265 11491 15587 8734 23545 9069 11533 1249 30892 31285 33773 24844 15500 12480 24274 31267 13441 13376 13384 31214 31732 32026 34875 13383 15113 31270 6555 28851 6466 11741 15502 25188 37417 16218 4571 5571 31708 1852
3139 1189 10091 8894 1256 5825
3140 19266 33911 23072 16798 8088 19263 28394 32146 24731 37392 4770
3141 783 10685 5256 9821 1398 14892 8355 25112 13299
3142 15 787 2791 2806 3245
3143 29174 17387 13747 15583
3144 787 1003 1025 7422 5158
3145 16796 13085 26467 16881 16657
3146 27399 19548 16018 35099 34353 17303 30533 28166 6292 36426 27655 36601 33851 16347 10987 25988 36065 16111
3147 586 1675 10733 23825 20121
3148 15369 26222 34384 12873 12467 29564
3149 3430 20510 21624 21625 35916 4166 36103 31148 10422 7357 16226 9501 35608 24062
3150 1189 14760 2334 19204 2605 2527 2298 15635 32636 37901
3151 6833 4970 14582 7964 32943 9282 9986 24462 34225 2170
3152 8934 10617 3523 3808 29640 11379 14863 4952 10450 10823 6134 3643 3603 7639 9173 23301 17450 14160 6197 12066 5024 28334 3629 2845 35326 5182 16614 12690 28001 11816 12609 11226 6771 12942 766 8696 5361 10316
3153 4772 3890 6067 3470 12186 10021
3154 22828 3863 20233 887 25782 21614 16278 19506 3918
3155 13774 9013 9575 32189 35772 8343 3291 3581
3156 2949 19707 3584 2787 12828
3157 12933 2699 19727 11515 25267 2365 2535 11521 17118 12119
3158 26500 5099 36743 35794 10876 15677 37624 1876 20657 4155 11954 1927 1972 4160 2330 1244 11509 1799 2046 12045 1638 2235 7448 12857 3367 21684 20054 34596 2306 2539 7111 11590 2664 2422 3738 4665 1527 18135 32636 10649 17556 36367 2602
3159 3284 90 20482 15092 7435
3160 7428 9494 772 785 1718 9501
3161 25930 9484 15515 15508 845 18965 760 7435 11894 2926 8696 1532 19695 4864 8428 9989 4331 649 35201
3162 28276 26322 23257 13196 17473 34240 17474 23197 29680 19398 36284 24436 19455 24734 13205 25807 19464 36702 35045 19432 25696 36283
3163 10274 7570 10133 8211 4102 10 13854 5533 22488 8365 7084 12930 5484 8849 31860 13482
3164 16238 24540 25220 28713 17301 19259 34699 26970 20694 20940 23600 26728 17897 27202 32773 26194 29249 20118 23963 32509 27728 31376 23117 35494 36035 20968 27812 16034 29260 30009 31082 32724 34353 31630 24555 25206 28119 27813 16528 19522 25279 29659 18943 32756 26191 26462 32236 29782 19520 22609 35979 31635 3152 28835 25984 16131 23361 16601
3165 19190 10735 16234 24961 23254
3166 17572 30196 17075 26347 457
3167 6232 1644 12078 17429 6501 31266 33706 15641
3168 12679 5020 30816 5339 20510 1717 4502 35869 14374
3169 9203 25459 37947 23848 28964
3170 6175 25810 15490 25928 10772 25242 26170 7394 10773 35359 26181 2447 8879 13874 22532 10949 23584 7404 31127 11521 36886 4183 36367 1198 34612 26174 5814 36098 2317 20704 7250 4133 36712 5825 2505 34433 8773 36915 10130 35733 37436 13318
3171 2785 8064 785 2787 2806
3172 1474 9828 32694 23119
3173 8262 2593 7028 8859 1143
3174 916 1506 22421 5611 12593
3175 19605 4953 34048 12167 2786 9574 3782 846
3176 2389 902 14822 7180 7257
3177 26155 6456 3348 7627 32372
3178 3179 801 10036 3783 15043
3179 10947 8369 4328 4190 33316 37549
3180 24925 36842 22932 25646 32015 5439
3181 812 1797 4452 4590 13825
3182 18368 14295 4557 9621 19709
3183 1310 13956 14715 991 9941 10288 12186 19025
3184 18565 24514 24232 18754 16554 24739 2693 16561 34945 16188 27915 3902 2767 37059 3972 23438
3185 13039 5181 23571 7868 8640 5396 9244
3186 33584 7123 1264 33583 13746 2219 4661
3187 1109 7195 4032 4415 8816
3188 8152 31841 7126 10321 25937 23354 7582 25883 14765 12346 12595 7488
3189 10630 404 29829 7833 786
3190 22867 24386 4343 8946 4667 1114
3191 8201 12354 9627 26068 3294 2484 21163 12927 6412 33348 1123 5452 19538 22872
3192 3918 23307 18019 24238 8876 24483
3193 10208 10696 0 7833 22678 13372 6754 14656 6659 32587 14680 11123 33560
3194 10825 31692 22166 12617 12922 33451
3195 3245 1826 649 8287 769 762 715 3489 34107 13 20169 11681 786 15
3196 3638 7981 15112 3629 14964 5012 11245 17723 9501 10208 2942 2782 21352 1540 648
3197 23363 25124 26305 884 24239
3198 8336 22127 19430 10805 19907
3199 29019 8510 4558 32627 32603 7598 30566
3200 6163 3709 17556 1838 661 28845 8205 5131 11834 2514 20072 2224 12878 7542 1039 2604 13449 2463 6097 5606 5099 1478 1515
3201 4502 7239 3259 9013 3600 90 4955
3202 7402 23153 5458 5760 26094
3203 5722 24435 2901 33172 3490 2826
3204 27145 20951 19259 23672 2693
3205 13852 2099 1189 33883 22874 35246 1814
3206 1513 20072 11017 2463 1516 1663
3207 12805 7434 11053 14362 37293 12691 713 5049 34251 19708 18366 32786 10431 30895 12545 18976 8328 19023 6845 21237 14223 34464 27947
3208 3245 3760 2866 87 33560 795 3430 1015 2904
3209 33567 4981 33503 31494 5020
3210 4443 4540 5195 13377 4515 13379 5094 6505 22737 17414 7208 17929 4073 5567 1567 16586 7555 18319 31648 11095 7151 5091 11004 9322 1037 6100 9346
3211 35827 21564 20877 22823 21454 22810
3212 22595 10947 26921 8801 1111 20412 4299 1070 5583 2219 7041 8524 787 16386 2781 0 6653 5473 11965 2936 1635 3839 10946 6487
3213 35965 31644 25921 1069 17291 2082 13465 17246 37807
3214 10020 10023 4680 7997 19029 1271 8049 17107
3215 1487 1455 1478 12328 11661
3216 19580 2168 17699 8633 3524 5268 24866 11396 7715 2725 4331 3292 6709 3322 11733 9154 13002 17739 35916
3217 23443 3565 5865 14618 13539
3218 3365 1877 2115 22533 9457 27811 2670 11360
3219 4863 5190 4301 24320 2912 3295 1053 33054 919 18432 23893 25928 7 25267 1142 1073 4509 26280
3220 8778 1189 13873 9758 5468 5194 7182 7913
3221 18376 17104 21371 34373 20174
3222 6928 10834 8341 3801 29149
3223 6042 15454 24288 24559 9291 15468 10316 2712 19697 8412 2718 18168 10108 7228 18175 26811 4081
3224 3385 2120 2379 4665 28120 14785
3225 665 852 9553 692 10569 2806 26836 9501 3324
3226 12720 11776 1796 20645 34702 17433 32417 5406
3227 500 4807 14904 30992 491 437 19112 490 409 484 17568 460 482 5979 29551 28032 25918 33962 24405 14507 439 17575 35852 512 21981 418 31564 15726 32129 36771 473 35826 37445 32101 32213
3228 1134 1438 8784 1971 8238 2069 22529 2593 17557 8946 1944 7254 11833 1837 3346 2389 2664 1638 14741
3229 6241 5209 1145 7699 6 8152 1050 1057 4257 6982 7 1043 781 5541 9781 1438 2093 11753 1702
3230 1244 10126 7257 10641 9701 8824 13823 7787
3231 21051 13284 1347 6297 18232
3232 7786 1038 21689 14890 5117 1250 32084
3233 23762 10637 7942 16387 14419 20685
3234 10637 10900 8813 11983 29817 26437
3235 3940 26879 19757 20853 19758
3236 10152 5899 6305 12226 22183 10265
3237 11892 15507 18314 30886 32188
3238 3834 9698 5485 5194 33101
3239 4660 1598 11291 7509 5582
3240 12574 23458 11631 1509 9904 12151 2092 1802 24861
3241 7726 18481 29246 3912 28316 18898 28854 30854
3242 2041 9852 10130 1458 5209 4876 5838 17208 4567 13761 1892 2916 4623 11956 2159 4465 1038 7493 4667 2172 8721 1067 10903 5190 1918 4354 2229 24330 12878 1496 6233 8376 1322 36150 2342 9796 7506 11511 2506 10092 7627 35639 7002 1524 7509
3243 13493 17807 33876 31128 21665
3244 27569 33457 3968 8447 32283
3245 2902 649 9501 6215
3246 8875 18394 20353 17855 29604 31763
3247 3346 2664 2110 24687 2517 14590 9430
3248 4150 10036 19028 2921 601
3249 8485 11257 2209 4354 2185
3250 13018 21410 33668 5876 37476
3251 10265 8159 10183 13345 15781 8106 36599 36944 10000
3252 12218 12730 6351 9998 4066 10000 36899
3253 16681 4770 20642 1772 8085
3254 17985 130 12414 354 494 12455 9602 3000 17574 359 29128 22789 32894 28365 19185 478 4597 416 202 21900 199 9519 21963 30225 484 441 34530 25413 3010 28364 29787 394 3002 3016 3040 30189 12664 390 21942 17578 32893 450 24045 3022 516 15036 22556 15037 23515 26397 32589 15374 141 26392 28774 4595 370 28624 30733 36432 4755 98 15727 29141 3015 21980 31681 15383 6003 21985 22827 34289
3255 9622 657 2014 5266 300
3256 2926 721 2808 4791 15516 774 704 1018 3245 21340
3257 2009 10978 12870 9422 19898 34407 35250 19540 7293
3258 2316 33820 34898 8376 12151 19224 7570 23837
3259 23515 510 8072 21765 4759 35260 17252 17097 8874
3260 2961 88 4979 92 7422 6254
3261 17 771 2763 2757 2793 785 770 2638
3262 7051 7130 26870 3537 35766 8 10953 3258
3263 9402 16437 18361 30653 25041 12752
3264 35065 10449 4277 19678 3800 3510 4999 15506 11650 9564 12015 3817 14319 7162 13018 28002 79 9287 29055 13025 3087 6659 3649 3677 5381 32874 4911 76 14407 2800 12330 14439 28880 26308 15452 28684 14436 17632 24458 25000 2905 35888 7146 13033 36339 19709 21855 29795 24864 21406 24062 28686 18106 37060 32693 25475 34935 15491 34680
3265 4297 6214 10091 890 7555 2686 927 8226 905 4473 10125 4257 8717 25111 4560 9464 9770 4881 1661 8274 26841 10089 2050 8774 13292 1837 6666 6433 22600 5523 1554 24316 6663 10712 1457 20175 22674 9791 906
3266 1156 12704 5607 1143 25364 12395 1504 7897 4653
3267 2226 1956 6166 5808 7250 8909 2701 2441 9026 7800 1949 4257 11857 1418 1500 10647 4463 16427 1663 2210 1854 14636 1176 2250 7472 10967 15186 32914 1814 37756
3268 2782 774 4866 35822
3269 15475 5323 31748 8626 13025 18966 14442 15450 31707 3650 13036 28849 28940 8668 3817 15481 25945 25035 28931 22948
3270 11124 25201 33835 37530
3271 6151 9565 3245 10834 11295 19709 19582
3272 1594 17396 2309 13035 6249
3273 4395 2054 1240 1324 13301 7778 2915 9210 36017 12818 1474 11540 7510
3274 2654 11696 6348 6366 6311 9877 15759 14234 6330
3275 3834 8781 8471 36863 1096 38040
3276 20314 25392 17587 21485 21488 17471 17941 17502 19380 19423 17495 25825 28348 17474 17486 23213 19437 25637 25045
3277 13479 8836 7873 36013 8830
3278 1036 1031 4135 4129 1327 1923 1646 5805 2254
3279 2377 16985 6647 5005 36915 7287 12388 1077 1659 32184 2604 3831 31688 1134 38012
3280 20285 4891 6516 33159 23125
3281 17184 33196 3273 12528 33053
3282 10221 25458 786 8706 2168
3283 710 826 8576 1709 8582
3284 1903 11124 10736 25201 14806 2580 3372 2484 2373 1157 12397 12596 12528 14820 14823 14769 1104 1264 7506 32183 13753 1810 7965 2564 32636 31976 34114 30834 1805 4555 7502
3285 14874 29774 26975 26147
3286 2169 4336 20362 2630 26847
3287 7699 15575 1504 22873 31277 20009 6559 13134 35701
3288 16481 21274 16493 3921 16886 19757 16480 23964
3289 19775 16026 16339 16503 31068 15607 17488 17935 9798 17944 21495 20519 26675 17491 21487 23200 17960 20513 20314 9726 17349 24482 4458 6211 2328 2683 19386 10572 19986 19989 17580 25101 20516 17486 23873 25697 17942 17938 17358 17354 25630 20515 17587 19988 15222 19080 21483 19403 26081 862 23204 26320 25834
3290 1717 3259 8649 2786 657 81 19709 2019
3291 32269 1552 1095 29612 18434 5784 28328 35419 5480 35894 4 1189 31841 33584 25927
3292 32771 27866 28833 16320 18186 11467 31962 35994 880 19488 33865 31963 34233 36116 16845 16957 31074
3293 2737 7264 6588 3206
3294 9294 10167 16659 4787 14528 15789
3295 7458 1478 22016 1155 2191 2913 13121
3296 3968 24487 7327 18184 16655
3297 3821 3294 33052 2622 15277 1187 29888 34323 37299 33257 34063 31451 33153 12410 12070 31215 31452 10623 25329 665 25613 25860 13035 6659 9495 8669 37007 24347 13036 33993 36844 3729 1960 2050 6551 27014 12855 12878 31454 6418 34105 37109 1814 36324 34322 17297 36098 36529 37257 1931 23153 31455 34345 35791 2210 36915 36708 9129 737 5504 10858 16464 37566 3701 6621 15629 6415 38017 37670 20536 31691 2191 15133 35796 36569 34324 35744 34325 37732 37970 31180 37808 37186 26106 37187 13318 3721 11517 33575 19948 3378 6490 6263 38047 6652 9501 5339 9013 688 13026 14687 6159
3298 22609 20838 19884 18490 11475 22828 20968 16885 24538 29177 13089 20005 31090 16861 26456 36798 16051 13521 28308 19526
3299 27821 7263 1910 33106 15489 11249 32326 1109 2034 2388 909 4268 9445 1639 11879 8238 6680 19205 17923 2389 1828 14781 14726 9007 3235 11977 5511
3300 13199 19994 19392 19429 21169
3301 8475 35248 10939 2008 2158 11309 1134 29089 2484 35249 4118 2501 8720 20066 11253 30572 5196 9223 14783 2503 910 2387 4568 1373 2212 2320 7624 1471 25090 13735 35641 2265 6564 2556 33392 7476 22071 2318 15809 11857 8610 18312 4416 7905 20498 35969 929 2337 24245 2422 18662 7193 2482 2248 1554
3302 2751 4331 3064 5351 3580
3303 16155 9501 3063 12315 21625 665 25613 2947 4509 10425 5685 20240 36090 6152 8038
3304 13428 6841 1130 1408 9221 37062
3305 20708 5802 7564 5825 1057 15334 2320 4443 6237
3306 399 194 8024 12665 95 20484
3307 7168 6423 7490 28725 6606 909 33584 12881 11506 9521 1189 12000 15106 6412 9847 1569 5116 4876 6523 9699 5580 1382 9845 12391 1441
3308 6628 657 2830 1682 1537
3309 1948 25346 2342 23355 34495 24684 30591 35789 2108
3310 710 762 715 13320
3311 4274 21007 6310 14868 18395 18373
3312 2166 8376 9822 13744
3313 3759 15455 21694 36364 13031
3314 885 18927 19173 19491 16049
3315 16163 18474 18593 29204 16127 1555 24757 7358
3316 8545 9574 7594 9134 4502
3317 2050 1784 6192 1496 1404 7388 5548 7096 10721 1200 13299 28128 6443 904 11593 1382 1114 10947 1406 10660
3318 2972 2386 30123 9833 1204 13098 1459 1898 1155 1471 2206 7558 31125 2787 13757 8891 11280 2705 26214 12930 2127 2063 1982 5227 1638 11250 1956 6546 2478 4893 2295 26516 1255 2474 24357
3319 3584 2907 17556 31274 36479 8818 2537
3320 14270 22624 18272 14043 14139 15884 18264 14026 12743 7735 17192 18143 8443 30317 14068 14074 28565 14065 15917 13148 3105 27938 19352 15866 29087 12741 25381 14091 12804 34264 11767 12748 22348 1735 22756 14114 14107 14050 14042 7853 37271 26855 22058 5419 22065 25380 15909 18413 22059 14269 8888 14450 32381 1286
3321 3090 2920 12196 3476 618 582 8045 15137
3322 2269 14718 23972 20667 2482 3219 14731 3227 8880 5734 2608 6531 14819 37086 32338
3323 3922 25220 32497 26972 22846
3324 2526 1077 9439 2563 2450
3325 11845 6452 1156 15178 2482
3326 9636 27213 27054 27543
3327 1095 4399 1202 9653 13716
3328 3943 1010 7386 27208 20972 21117 20973
3329 34375 21497 35536 21182 36355
3330 2800 8649 93 2818 4902 4331 29646 87 9501
3331 3936 36000 20349 32742
3332 785 722 11895 3248 5023 8436 765 3063 7881 3356 5020 6732 14374 3074
3333 2712 790 715 2781 2907 7881 9989 762 2904 2965 33560 4509 12679
3334 15126 1256 10133 2604 1264 7509 14766
3335 34525 8967 2891 29361 10814 3660 2808 800 2934 28335 5020 21139 12888 7953 28334 7435 9136 12609 32945 18769 29496 9501 37941
3336 92 11894 6651 3245 1718 8696 760
3337 5420 3095 23788 1769 5416 13373 8501 18700 646 28420
3338 15630 4862 6950 93 2902 771
3339 1493 11576 1983 4416 928 5542 3295 4353 20706 14244 23473 6433 6220 5759 2141 20795 11538 6540
3340 5577 1248 1046 1515 3600 3287 31447 7131 33584 5482 2239 6702 3490 4664 13483 1837 8242 30592 35787 13299
3341 28547 13352 9879 13349 6287
3342 8192 26795 5601 802 9864 8865 4327
3343 21917 30817 15884 26851 34997 14705 7664 5429 1742
3344 24722 24981 19189 19088 23438
3345 2913 1245 774 2766 826
3346 9286 13579 19864 13040 31485 34513 30776
3347 7232 32277 10195 29217 19712 24297 2855 3678 10864
3348 139 8940 633 1290 10547 10724 14092 259 30230 30204 32544 21790 5403 18143 17987 12022 32214 1757 1351 542 142 175 2019 811
3349 3918 32554 34686 24828 33787 31473 3189 24466
3350 15448 4505 2739 23845 14407 25861 14195 707 5319 15458 31978 11383 26572 11123 15468 20806 35206 18197 31707 15471 701 3680
3351 23848 9156 2860 15405 17914 29124
3352 2559 2417 15797 4431 31028 13866 1050 1597 1170 19728 4879 4658 2392 2191 26178 2369 30376 2482 5577 1171 21310 892 7049
3353 11983 21513 1104 19205 22870
3354 703 4933 3312 3812 3647 10410 11302 4939 8645 6043 14167 5020 2170 13666 4919 11383 844 2858 3807 11070 3799 8656 11816 7953 5057 21207 11694 2830 10450 23301 18083 2899 5063 6795 7261 8342 15441 11636
3355 17493 17963 25636 19399 19989 17961 21868 30960 25701 19409 26118 17358 26202 21488 19372 15213 10983 15223 21490 15607 31986 25635 9799 23248
3356 3296 13093 1138 7186 20302 2482 15126 30947 4422 24378 5461 1446 21151 11521 3371 15503 24332 7038 9753 7285 25347 6975 20144 31924 1044 15275 9315 22426 24646 35670 12143 4270 7765 11879 13900 28083 1051 31915 37864 8850 21867 7942 37915
3357 1050 2081 11959 2082 23282 1518
3358 15847 2690 20710 9637 3928 16905 3972
3359 22560 3031 16228 26344 21453
3360 33223 34840 23803 23810 33218 23798 21393 36165
3361 8636 7872 1534 2709 7098 7123 6134 8635 5564 19153 25768 24133 1069
3362 13203 21489 19033 16477 18919 18829 4557 19466
3363 253 36457 3003 5984 21916 32100 37718 25416 4811 19112 17522 37813 32521 35578 165 157 28640 2988 295 38006 34666
3364 11896 6053 8757 4980 33567 8693 16384
3365 29703 14682 6421 8066 1031 4648 5826 8734
3366 20610 26894 774 12679 9498 3536 13372 2806 649
3367 34464 20587 14432 768 2865
3368 1057 3218 1989 1478 11753 7695 33920 1056 909 16984 2135 1066 2584 2388 28725
3369 8167 17268 11179 19246 28421 12228 12289 21108 21114 28551 20998 496
3370 2785 9574 3655 7120 28978 14317 21862 14923 14195 16979 8669 7964 12638 2804 13277 811 6954 4928 8679 5054 9586 10158 3608 795 9013 3245 3683 790 10408 8330 5053 3284 5061 14942 4999 3076 2723 13587 5858 4800 22177 9558 9984 14405 14366 14651 17015 19020 11403 13446 8693 3649 8337 3291 11895 9989 11245 768 14945 12864 14924 10482 14966 35886 13372 37943 32140 26012 35842 24462 32791 7658 37848 2779 4502 816 37961 2482 15461
3371 1941 731 734 4314
3372 8068 9639 3259 2819 8665
3373 27379 16653 27403 3184 23601 23337
3374 9608 9602 17067 19106 17040
3375 6479 9805 2198 893 13906 1129 12930 3294 30875 8271 1035 7508 20302 15667 2252 13093 1701 9836 15926 21867 11965 4188 7631 2588 2201 8827 1474 5097 31178 9459 1164 26171 37733 32128
3376 1716 2775 1540 783 82
3377 3330 633 11756 26432 1765 7668 632 1753 14092 2703 18693 31764
3378 26395 200 3003 34288 5984
3379 15037 15544 323 31539 2994 34288
3380 9822 4365 1103 9869 4653 37115 34566
3381 33305 16742 14742 24970 1877 14747 14591 29383
3382 26351 31944 174 17078 380 22017 33 14895 33165 24417 34216 15044 15348 30229 22818 17220 439 17991 436 34586 21564 37085 542 21797 36169 121 275 15041 22827 244
3383 2537 18135 1640 23565 6531 32172 36493
3384 2085 7990 17521 6998 8565 780 1457 14233 17425 13077 31926
3385 24636 9577 2781 774
3386 9858 15728 33890 15636 8385 7501
3387 2147 3723 15800 7070 1496 9869 5626 12273 10681 10247 7460 4636 6078 7909 9700
3388 14097 22341 22638 30584 22345 1354 11090 11889 32282 22351 14077 14578 28782
3389 9104 21745 16623 2791 7262 13596 5356 2787 31316 33058 26573 10411 10462 5401 8693 4999 8756 32632 9165 19717 5326 37338 2781 8342 25352 31512 15056 10240 26014 26572 12910 34928 20437 30518
3390 4065 20988 14663 15756 23711 9410 2649 10153 6348
3391 1728 22625 10984 13992 37052
3392 18203 20855 17801 5249 20693 27261 36622 27646 37972 38041
3393 15126 5486 2278 1132 5580 15253 905 4139 2005 1518 7070 12648 1084 1426
3394 10983 17471 26322 17500 21480 17468 17465 25391 13194
3395 17489 9799 31229 19085 25102
3396 9865 37487 1051 7111 1644 25138 30843 2583 37807 2366 4369 29881
3397 558 5163 17130 10044 5166 25360 4853 17869
3398 14762 2123 2535 2365 6712 26863 4891 1696 25950 14726 13161 3 5702 765 1051 3237 32918 9430 11567
3399 9090 773 11649 9501
3400 660 1084 31579 7793 1499 35193 11501 4463 35787 35387 12756 2054 11479 8773 6508
3401 2553 20446 6439 9702 15657 7510 15312 2546 2050 25139 20538 6456 1244 35939 9805
3402 6732 2936 8683 2835 2706
3403 11933 5416 14268 14003 14051 11795 10724 22629 25370 12802 25376 12742 10518 14260 20946 23347 36879 34756 34987
3404 31324 36128 33650 35317 11124 20675 33398 36410 34359 20890 37507 7387 16508 32683 19515 16163 22320 30449 3998 33783 37031 36129 34269 37033 37926 24961 37960 38031
3405 13625 10643 7631 9658 16387 2506
3406 944 8119 5264 4039 8129 8513
3407 3817 3575 19709 12330 796
3408 9290 5396 20573 28099 21742 5844 7335 32874 22147 37375 847 3574 7162 32697
3409 24960 36749 28319 30709 26976 21414 19752 16739 32504 37912 37926
3410 3379 4257 15640 7450 11325 9735 909 1240 1451 11885 1979 924 2106 1244
3411 7162 12166 31939 26375 4979 15443
3412 12327 17913 3133 1826 3055
3413 15850 14127 30779 31420 12803 33636 29087 14091 14089 1747 22926 31011 34992
3414 18787 31823 783 5714 13498
3415 26622 18188 11474 19532 19001 26076 27228 17970 37307
3416 1829 2290 5087 2151 1833 21691 12070 15844 33207 13186
3417 2812 8787 1129 2162 5485 11547 4474 23830 5776 2267 12309
3418 2706 773 1540 2820 10395 662 2783 3430 787 14812
3419 21829 15161 11284 6658 7238 2833 8435 10394 30633 11304 20413 10920 12894 5397 9202 9564 24872 25298 35214
3420 2298 6465 11990 12151 3457 15306 16742 17203 4665 19539
3421 8702 16064 8765 1011 15971
3422 21857 11403 5026 3651 8677 8668 2809 19843
3423 7136 8764 1187 13467 1995 8378
3424 16741 16835 7384 13436 18008 18937 19529 3844 19491 7385 3968 3856
3425 3555 2951 24251 37582 8752
3426 33989 2435 12695 2537 26175
3427 1826 7262 7978 7488 9431 24697 17291 18157 1585 4396 11596 20188 6502 14820 1696 13130 37729 4408
3428 25672 20369 12820 18834 18864 14295 6140 16279 17437
3429 18240 8506 19306 7734 22915 1751 28210 2703 14046 1732 19352 4015
3430 7938 4328 6606 8668 4928
3431 33345 27855 32722 16101 30032 27225 7363 18606 35229 29185 16027 4777 19515 18954 11474 18436 33209 28842 28587 26076 28823 28830 16678 16713
3432 23271 17961 3593 9986 8752 9 17366 7428 2809 14643 14364 33291 2908 35325 16610 34239 21154
3433 4149 5567 17659 1240 2232
3434 4091 10834 7353 5031 9811
3435 3230 7823 12694 16752 918 15812 3367 2529 7397 13819 3361 2166 2144 2159 2296 6465 2518
3436 6650 2787 2814 2742 4498
3437 16114 23326 18718 18928 16034 20836 885 16815 24933 24079 16035 21531 16655 11455 8767 29745 35216
3438 3162 7327 27061 16794 3968 20205 23103
3439 5913 18162 4791 26424 776 17610 3568 15162 9567 24614 29328 35066 16625 14391 31806 13029 9574 36617 31511
3440 636 4720 313 480 21563 19112 3047 24325
3441 26047 345 21873 28615 28632 10868 1617 435
3442 16494 16295 16507 22748 20932 26750 16601 4772 18713 22247 15613 23046 20889 16140 16036 37359 9636
3443 733 2784 765 688 1025
3444 3546 2888 15 6651 93
3445 13668 2482 3627 14988 9621 10500
3446 387 30272 26049 14709 31535 17987 4740 21955 20634 19921
3447 12502 1448 34117 11943 34460 6516 37790
3448 2206 4881 5209 5826 11520 9746 2482 9904
3449 13153 36841 619 10277
3450 23159 27444 16838 18546 14276 16129 4777 14286
3451 27164 15201 31342 23864 23957
3452 737 10600 13002 783 6717 652 701 2902 2858 2876 13441 703 12921 6654 15 768 3771 13496 6022 15514 17722 3248 17915 709 93
3453 13262 1934 20129 692 3500 13662 10612 15421 4576 3757 7314 3817 3628 3597 2868 3568 6729 6036 8333 22111 5355 1018 2020 15707 34510
3454 745 13641 6287 12566 9305 33134 15009 11217 3256
3455 5992 17985 21990 5982 14706
3456 566 12189 17051 33306 7530
3457 19272 19273 32608 8668 3684 28962 34935 1018 21410 15475 14946 3804
3458 762 2902 1001 13035 9501 710
3459 8329 7428 14866 25352 12906 14650 14396 18366 9986 10468 20746 24937 13026 3777 24452 21409 28966 3618
3460 12970 29597 3089 29598 838 23430 9964 12204 8460
3461 7593 7765 87 7261 9251 12314 787
3462 9768 1321 1423 6174 8192 1329 4604 1318
3463 2531 2396 2537 2352 18129 35788 37537
3464 18388 18488 2751 4936
3465 1887 2604 2570 15173 11998 30046 14815 30953 37155
3466 28224 26002 21403 23804 31494 26643
3467 29177 26861 27308 18859 20843 3173 29381 29292 30284 33752 32535 20350 22840 17735 30736 16060 32780 27518 33831
3468 20539 15928 2537 7631 20538 6263 31689
3469 5148 9335 4233 4499 8750 685 18687 18690 26555 2023 5037 11120 14872 26230
3470 13640 636 9873 624 32577 22190 28424 36314 8764 6502
3471 8376 17300 22417 15669
3472 29609 13147 14240 10359 6432 6516 34557 34875 6440
3473 6687 8033 13 1056 3709 8805 2380 2378 6581 4367 11842 13209 8764 7699 17423 13120 14309 29151 6418 5530 22881 15628 8812 17480 2047 1496 7270 760 36389
3474 17767 24169 19773 28579 28116 13436 18467 24444 33208 25071 28113 16177 29317 19508 24147 22320
3475 1618 7117 4135 23122 24678 1970 10125 1855 23509 17424 4031 6308 27756 17182 6550 2034 4368 1916 11510 6418 4179 4653 2166 10087 4336 23546 6610 922 22022 1040 4628 31667 31529 7027 13475 6501 15133 9346 1322 2482 6436 9468 29885 8376
3476 24113 29027 33212 34786 34852 34792 35605 31855 36166 9551 34793 23425 31415
3477 2845 9275 3075 691
3478 4634 9757 17928 11910 7897 4188 4627 9398 7477
3479 2900 9570 6925 691 14346 10500 31788 21527 9291 22435 7435 783 28902 852 32990 13036 5325 34935
3480 3313 28141 1439 4443 30593 2516
3481 8120 20786 4058 5261 8135 28342 2
3482 2011 2481 6621 10635 1057 13756 2482 6408 30600 2472 2544 26172 14818 13863 15934 34406 4178 2440 36840 4555 23837 11832 22890 22388 13168
3483 9569 23747 22769 8281 30161 7830 28906 8692 30886 19018 21256 4082 32452 3804
3484 7149 660 4124 14691 23137
3485 2705 8372 6531 3719 8742 19227 2537 9363 20077 2541 13319 2129 27901 18156 7488 24675 6619 4653 37347 2902 13123 13233 1101 31691 20240 15274 3714 37791 37618 25329 31688 32027 37098 24375 22418 2570 6436 12328 4662 31108 2365
3486 24317 7015 1596 15089 14752 4670
3487 2351 11992 19209 2525 2608 5642 14690 12151 23510 14760 1604 2663 9443
3488 17367 17494 24482 26130 17579 21496 17488 17472 19381 19433 20371 17585 21493 13197 17954 21478 15232 26324 17500 26082 13193 17471 24733 26322 20515 19384 19409 17963 19083 23871 25098
3489 25131 4484 10643 11916 9063 4634 4879
3490 20510 773 6659 8626 2748 769 762
3491 621 28815 3463 28311 603 8465 19035 837 19041 35412
3492 5717 14411 19705 3496 17916 1017 20586
3493 37757 31136 32515 15554 37157 31605 29418 26358 384 292 420 150 34285 22824 37906 30393 36635 32524 19911
3494 8635 20726 25053 8690 3570 11071 4500 3317 10410 33481 2959 3312 9104 6719 22231 9893 4974
3495 1439 15667 26241 6403 9743 37311 37426
3496 6338 33957 19249 34487 32131
3497 9141 30770 5072 2767 649 3167 9113 868 28409 9029 6813 6919 7956 5069 10596 2949 3639 6773 5268 3297 96 8020 3323 19632 4304 5667 5034
3498 4157 13806 7342 1515 1478
3499 2106 1109 5518 1524 20532
3500 13695 22371 36725 26867 18376 20352
3501 19053 9963 586 17871 18059 26686 597
3502 15311 4144 14418 15684 35193
3503 19442 24512 21495 33516 30961
3504 1327 1250 1322 10319 9754
3505 5511 12867 30123 7047 12575 1949 2309 1981 9911 2440 25866 1639
3506 2384 12998 12855 25546 1855 11978 12646 31691 11094
3507 24108 1775 14449 14104 14552 32308 20557 31421 24109 8499 22627 33270 36729
3508 17239 15111 15124 13465 1134 12060
3509 3600 1543 31838 19707 4928 1826
3510 20118 23967 11124 15617 21551 31347 11221 25083 33782 23819 28839 37960 3153
3511 3584 13683 4915 765 3649 7261 8668 7833 6659
3512 10770 4183 11916 20792 17056 3299 1322 4334
3513 844 8692 10373 5396 12015 12017 6134
3514 1558 1498 6265 12345 17673 19562 29155
3515 10566 33439 34054 30801 23869 19473 37383 33441 23261 23256 33329 26545 34242 19436
3516 32645 23242 17595 19983 26538 23018 17937 23873 19985
3517 7792 6564 1459 8905 11478 3830 6841
3518 2579 20307 13808 7759 6247 1919 7509 23455 19361 9833
3519 21566 16173 16896 17900 18732 16038 23622 16023 16168 16028 24824 3996 16601 16311 27285 28672 10987 20857 20837 16803 11455 20525 18956 25504 19255 30469 21812 7363 21517 20844 26263 16103
3520 7965 8483 1104 3227 1388 9719
3521 15457 25699 10474 28968 35949 30210
3522 5107 7907 17530 6497 15643 20561 24848 37237 26167 4602 13318 927 6094 37576 5451
3523 12651 31607 28471 37085 34216 30080 162 14701 31772 24410 37076 31944 392 27844 35478 17085 338 63 14987
3524 27932 17125 2770 13793 34472
3525 12905 34524 29671 3590 24863 26827 6937 6722 18625 36174 35355 25481 30382 10812
3526 3245 7880 8665 2818 7262 12509 19178 1860 770 37589 29904
3527 8895 12275 20755 23860 25194
3528 25813 1240 2165 14800 1259 8672 1515 8372 6497 33751 6443 18660 34565 36528 6525 11652 14461 34731
3529 774 685 5278 7956 703 5242 3756
3530 4181 10352 32023 22144 20240 36219
3531 18499 18350 16878 16308 5249
3532 2912 2724 783 1029 9501 6278 12017
3533 17578 28612 22002 28775 9517 28464 28629 26052 32525 3020 22901 21768 13100 429
3534 3363 9673 7471 1109 28055 6606 1840 12146 13864 30077 34389
3535 32630 1540 8757 4237 0 3525 9502 783 34859 8752 743 5380 23834 33196 4 7126 2494 1084 1142 2109
3536 14271 0 981 93 11700 2811 300
3537 11962 2604 7420 12300 2461 7627 7635 14625 6502 15664 4388 11661
3538 33068 14643 20240 19907 11071
3539 10139 2604 2281 1702 9905 21689 7448 1221 13857 4387 2407 26097 2617 31178 3771 2779 2808 5514 2038 22425 10640 7153 2162 12349 7572 12753 12930 12397 11962 2036 1176 3375 8947 1984 2248 12591 12752 7404 13763 19209 22414 2381 9985 10805 8345 1395 2530 2389 11752 30288 2409 5209 32416 2630 10934 19896 5012 18664 19196 792 8185 34106 669 93 11652 2012 2813 2737 2729 26177 37232 11106 5227 1810 20529 2563 37455 13094 34962 7135 22171 1057 2506 33992 25329 5756 2598 24379 33988 2479 7501 37818 2339 34319 6170 8823 24392 905 26179
3540 7043 11682 5217 7074 12825 14668 8833 5190 17254
3541 22838 37506 29773 34541 25765
3542 1244 1465 7822 9724 1114
3543 8058 19095 10278 4846 5293 619
3544 9578 7239 18174 1626 2781 721 8799
3545 1024 31745 8752 2834 32607
3546 13146 12802 8504 14053 18275 34263 2703 17840 1788 13684
3547 16988 13820 7178 5258 18675 19152 4459 4183 922 18357 9399 20278 12367 12996
3548 23702 20124 18924 16505 3880 16049 18741 27236 19502 23672 18526 2698 23694 15846 16953 19089 16034 16957 23338 28149 16723 20102 7725
3549 4280 20669 29824 12935 26697 9233 17698 9256 15 13649 30345 3250
3550 13982 3330 5404 23982
3551 6350 6316 5885 6284 34266
3552 9811 5778 31787 2804 5018 4585
3553 12403 5527 2687 8775 2974 10005 10948 17669 4339 1038 15709 17429 11505 7501 25928 2342 16924 6235 8777 28955 34305 35671 18539
3554 656 2742 762 5322 2775 19554
3555 313 21599 12459 15553 5988 144 306
3556 34329 24378 7435 14775 31911 6428 1553
3557 24078 18955 26146 7726 30468 28303 24084 26455 17893 28242 31090 7327 21412 33236
3558 34264 37064 1728 12801 8452 34263 14090 18257 34069 10724
3559 3628 5057 23502 5390 14384 11652 7833 8336 10374 13281 5393 10463
3560 18265 14492 15877 12812 6351 9048 15884 26336 1010 15871 1751 3330 34891
3561 13288 7038 8810 2686 6565
3562 11656 20776 23307 22748 22700
3563 2436 28724 2089 19540 30877 23839 14774 1826
3564 4424 10248 5465 3702 11532 6421 1134 8946 910 1979 1256 4548 1251 5487 22031 1245 12346 24351 33818
3565 4648 2160 2191 5478 1030
3566 19289 1011 8509 3355 19559 15969
3567 17075 47 3804 13441 3651 2809
3568 4500 2851 665 17840
3569 2881 3065 693 857 11736 21816 4979 3046 35124 8636 13649 3599 30147 3685 3313 14184 32385 14395 7651 7238 12007 8556 8346 9366 842 2855 10394 8680 13610 14346 14377
3570 24666 15211 28497 3958 5305
3571 29867 5841 17971 6751 6782
3572 20081 15973 24209 16657 16786 14276 16309 19542 23702 3999 16564 27429 9609 15618 3164 16773 27374 18713 23440 16469 10987 16601 8083 27430
3573 6331 20453 14604 21637 21047 21071 6334 754 3214 21033 9408 6310 5029 32045
3574 13673 1542 8639 21271 3645 93 5018 7210 3490
3575 13147 2008 22072 11325 10643 2252 6247 13626 7493 23122 6216 3461 1663 2602 11486 7986 3372 25131 6307
3576 2945 7722 800 665 2835 3300
3577 8521 19249 13623 19072 32004 23031 30694 24002 6284 5901 4066 21113 12568 11153 11162 14237 28917 13622 8098
3578 1039 6501 1038 1134 2526 6170 12883 24848 4517 1066 23944 2610 10900 11747 904 10649 1264 30891 20235 6498 1438
3579 1624 3750 10964 5577 31708 7435 7035 1087 892
3580 4648 13760 5753 1471 2361 30125 1661 1621 4168 4256 1816 2250 2029 7299 1831 902 25369 20072 1948 8946 15320 660 14668 1238 2255 2357 2234 15340 13819 29878 20307 17227 16979 2867 3245 12679 7827 2196 4893 15667 1157
3581 32349 3636 30030 31194 17740 11409 8683 2809
3582 2975 537 20484 27983 64 385 26358
3583 10955 11079 1558 13437 2183 8605 3248 8918 31552 14339 89 2412 23155 1165 23781 11881 7096 17420
3584 11 653 93 2927 827
3585 25923 7034 8780 34305 31562
3586 6502 8260 18434 1592 8275 2064 4178
3587 11803 26872 28609 3304 6737 13504
3588 12008 6429 7827 9385 4186 12500 6980 15567
3589 9602 15725 9915 10762 17155
3590 7366 25504 786 10569 12825 14532
3591 34228 24633 2964 9582 0 25795 2440 2372 11976 11499 4191 7498 24392 5768 3680 32644 13416 2415 2633 34769 19854 4535 8 14636 26171
3592 26273 21692 4434 14589 19124
3593 20408 25112 31215 25657 33711
3594 1070 1130 4601 1509 2199 7070 9788 7159 780
3595 4310 2797 1003 2012 4313 2784
3596 24482 19431 25693 31234 21567 17943 7259
3597 27980 20158 20960 35947 27378 24722 28326 27560 29318 28576 17749 17339 20256 18878 25207 28250 25975 16569 28663 16552 35363 31389 27029 34174 29538 34353 33039 36722 20350 35090 27728 34905 28836 27854 27538 18496 34179 31373 31334 34777 36802 25574 24520 18037 16188 29236 35413 23643 31963 32779 18188 31377 32568 34658 35062 34269 27030 29930 31384 17815 28243 29186 30391 27628 34360 34176 30896 35880 31363 36134 36855 3354 30652 30990 29257 37188 35027
3598 1470 1138 24320 1439 9789 2705 11499 3045 13093
3599 22660 14769 11983 31524 26210 20490 20529 22030 3222 35232 12362
3600 781 12372 30179 2623 1240 1706
3601 6803 13273 31582 12910 35391 30206 21228 22516 9185 8668 15447 22280 9581 5695 28007 5396 18168 690 27834 28912 36792 31789 8415 22964 28909 10486 15471 28963 11814 12896 10817
3602 17499 25687 19429 25684 19991 19084 17360 21571 25819 19078 19077 25694 24356 30801
3603 10246 1474 13893 2705 30722 2686 22386 2587 8826 6486 7627 13881 27793 2254 2551 15685 6451 15586 12496 33154 15111 6244 22035 7122 25544 5100 13094 28233 4570 4349 30050 31265 33774 31258 2604 6455 33773 26663 31264 30891 26224 36453 2602 9863 30404 1190 12391 30358 2540 33772 2535 9833 12143 31212 22672 37532 36204 6508 15671 26440 1971 1509 11094 33934 2338 6417 23129 3294 2050 1939 14312 2591 4028 7510 22602 1404 10954 30370 9065 13735 1380 29038 23525 23139 2399 24688 31155 6497 37186 7502 15643 26185 1933 26216 7057 10658 26182 11934 1461 16586 13774 1935 2036 1457 32027 14318 6523 5825 31108 35745 4427 33711 6517 31272 6504 26183 17249 1709 20076 37061 1142 16464 14664 31285 4465 24843 2127 2386 4482 6542 24944 23524 6477 10070 2216 5485 24360 24946 1524 18360 3702 4876 1239 6223 3334 2376 5645 20807 11327 1602 34735 5833 7802 1580 37808 15659 25978 7509 33669 4075 8275 3821
3604 26485 7377 15863 16093 18499 23337 22609 11449 11124
3605 17766 33500 27501 10223 21299
3606 8665 2793 9624 2784
3607 9839 4662 17284 9741 13486 13138 3722 35120 20176 9790
3608 16392 26067 2208 25563
3609 4881 1244 15741 10980 24676
3610 1271 28212 7761 17839 14091 978 14068
3611 6497 2552 17341 35419 13886
3612 32936 28503 28220 28741 21421 30432 35500 33555 32298 32862 1010 1011 36333 31289 31121 28516 35204 32753 9058 20189 25084 37764 4783 26457 35117 22540 19268 30649 3352 24922 15061 30648 35610 33181 28734 28515 25277 36765 17898 6297 35923 3124 13154 33822 5423 16004 1786 32703 37544 1357 36686 35255 8500 33146 36446 36790 28520 29897 632 31294 34128 31079 36924 25207 35136 22463 12788 34413 32161 30107 35098 21580 17276 25729 18998 31346 33342 35494 20922 1351 35254 27812 35101 33779 32782 14037 36298 28523 31358 3432 22687 34179 22508 35068 31293 32220 28171 34616 32759 33768 12948 12823 973 6294 14091 1360 32656 32293 29855 16196 30652 32414 24805 28453 4008 36027 37540 28219 30443 22503 29168 35299 35495 35174 28732 30450 35300 29286 29287 34617 36371 30003 30271 35307 19950 31363 31353 32869 31356 31394 31352 35277 36925 31614 32754 34003 17835 30650 31297 17784 28695 30270 32925 33912 33397 32923 36447 32013 30267 36000 34579 36292 29246 32056 29306 34580 33767 31292 29747 32115 35502 32868 28223 36550 35262 32302 36448 29582 29298 30766 30989 35483 28053 17975 3190 35496 37900 28500 37172 28810 30259 24247 30512 37295 35421 32865 33333 31122 30988 34809 36546 35172 35503 33781 36678 36679 36230 36934 36326 33340 35504 37677 36373 35407 36080 17735 36716 34893 28393 25600 35454 36375 25603 35156 25069 34921 22859 35463 34659 29896 36273 34045 37285 32870 35570 37646 33335 33336 31124 35464 37399 36445 35263 18559 36890 37616 33916 23117 30511 29538 28748 35759 35803 36928 26434 31092 28823 34258 36889 37481 36081 36083 36980 22955 35041 28531 37003 32866 19190 31376 11474 36681 32863 29260 28838 31384 33904 28119 24573 28535 27928 28396 37439 36929 37649 33354 37574 25221 36426 34619 33873 34025 1021 37615 36362 29259 35224 17797 34856 31379 35040 36201 30448 34682 37510 36551 24242 36552 36086 37896 34040 28226 25988 37477 33615 34292 37244 36236 26965 37242 37936 29307 34041 37963 37284 20354 34022 23245 30859 17458 31086 24181 35422 33737 36340 33355 35038 32683 29322 30429 16970 34980 37004 35036 17977 37236 36093 25717 36065 35316 36203 35025 34435 28222 18742 37750 37558 33888 37032 37031 37989 36855 34581 36874 37647 35035 35874 36409 4010 32864 34620 5252 35406 35423 32860 34024 33913 37899 5336 18876 33874 36857 35042 36129 5250 33352 38022 32237 30990 28701 10298 36981 34167 8145 33227 37796 36935 19954 36112 37517 28652 37710 26473 37671 35491 37632 36714 17897 36614 28228 37174 37501 37083 24525 36194 36359 37935 25279 17798 20168 37283 35336 35150 37739 28166 24184 37433 37612 34416 28225 36026 36711 36231 28533 37979 37221 37196 37820 33903 23965 32867 37871 4004 37198 37356 37876 29257 35075 19530 2693 31370 18188 33514 37627 38036 37854 37939 35710 38027 37855 37628 23254 36922
3613 2905 772 2800 6719 9252 12158 14579 3695 3792 4315 6951 9246 2902 4498 13657 10388 10391 11705 8640 4803 6954 11286 4938 5068 4284 3502 3779 29951 22110 2767 3771 3064 12155 762 13539 1934 11024 3305 3774 6765 14208 3581 7963 2796 3667 29444 4303 7433 2898 11732 3074 19955 8639 5172 3555 19291 4301 12327 3291 3770 1018 14188 2023 3644 11422 14925 3076
3614 3495 5727 1445 1826 7425 8018
3615 33101 13869 2577 1457 1657 2552
3616 14999 3827 23158 6613 23041 17542 6457 3824 1245 13381 31265 8887 6558 12505 20362
3617 25897 17744 3628 10611 22233 14959 15473 18123 8611 30458
3618 5365 8606 6667 7982 711
3619 13081 5084 1255 4133 14785
3620 1713 1897 1121 11486 7489 7175 1631 1818
3621 9246 6844 5355 4939 5054 2849 4964 3690 2871 9219 5683 12771 2868 10814 3291 3600 3650 1444 2796 10395 2182 4332
3622 14798 33201 33990 33421
3623 32012 16234 27295 14499 31357 27296 27569 21161 27580 28497 18343 26612 27732 16673 10698 25871 34043 36358 27241 24152 3995
3624 10435 3787 5489 5858 10569 8342
3625 10902 2583 13922 37754 5734 9897
3626 9055 4467 2702 1053 8810 1057 3371 905 8483 4603 5620 2414 7515 1598 2144 10900 2602 6403 12779
3627 30210 31753 31751 15053 14443 33066
3628 26121 26084 26128 19380 26677 26087 17499 17933 25828
3629 7501 24286 1386 32511
3630 18763 13 31273 9394 30104 19727
3631 9989 7052 10803 2748 769 13363 7843 9299 21175 32820 2787 21639 762 9295 12220 27845 36508 21173 8109 10172 33841 12231 8517 3203 8113 9307
3632 17673 9822 6215 3820 20031 10145
3633 16846 16484 13520 20546 24574 21674
3634 15645 12328 14596 1474 7151 9846 23555 7626 15664 24373 14974
3635 2292 26175 26095 26181 2496
3636 6580 30590 34776 33774 32020
3637 33668 28848 5496 36885
3638 4588 6717 703 3349 8158 21312 8645 9582
3639 4048 26648 8131 7212 7267
3640 11449 20941 24796 24182 26955 5249 32221 7371 21422
3641 3513 34724 22880 37523 18175 35430 32989
3642 27829 5166 5303 7534 5315 4689 31489 29525 6640 1269 5306 608 18848 15612 4687 583 19029 7532 10295 943 8129
3643 1496 4538 7802 4415 3826 8194 4544 926 14751 5092 4180
3644 3451 25171 5540 5576 11557 5539 1404
3645 15877 14094 8451 15913 1776 30778 22931 32675 821
3646 2306 20706 14746 11274 9454 17532 7302 34471 14575 22026 1837 12397 24697
3647 19971 6350 6374 25423 20609
3648 5770 31982 29613 1966
3649 19502 18466 20944 15956
3650 12346 1637 1855 12978 3130 27644 7002
3651 3284 3491 8670 8329 33426 2798 27975 18629 27977
3652 6752 5677 4993 4911 26377
3653 8003 6641 22083 7537 8059 36416
3654 34610 17245 33532 35991 26006 13919 19215 16426
3655 11479 7460 4654 1134 890 1127 7882 15079 13749 24682 3705 1059 24685 1115 13111 7900 20408 29046 11093
3656 35440 35439 1727 14137 10344
3657 28023 1638 10946 26173 26184
3658 3766 14204 4907 6917 6123 10198 3281 15409 14949 11076 1947 30151 19605 2865 17597 13556 10598 21191 7703 3681 14563 17702 5022 3508 2965 7430 2866 21207 14218 6773 10451 10508 7811 7710
3659 2846 2796 5857 3784 3682 2867 2803 23479 11730 12601 4971 7260 795 7949 3608 9545 1531 14406
3660 18126 16741 3194 3173 4787 16915 16007 16647 4703
3661 3627 8626 3804 8287 1860 3651 25170 3259 19709 19716
3662 8399 20 26024 3324 1551 17039 3647 2636 3245 8343
3663 1018 726 853 3511 8616
3664 23930 19042 12093 22655 9945 8462 6637 9961 33245 4729
3665 10090 22239 10959 10857 9002
3666 4634 9767 1252 10788 19208 9026
3667 26095 5808 35793 2482 2533 1946 24034 35794
3668 17423 19315 2102 10901 2523 1816 1810 8719 1696 1053 12131 5213 4215 4173 2172 11488 1800 8370 5532
3669 17339 16831 5340 9501
3670 987 10040 37223 10278 29501
3671 12330 3759 8677 24454 3626 17293 10482 3629 31755 22280 28786 2819
3672 14435 35004 21147 32931 5395 10484 10475 26369 29351 6915 18669 30757 2833 21844 2175 32610 14454 33808 35989 24561 12613 37499 18170 20400
3673 14643 16384 28975 13535 20415 10598 14933 14404 14396 2800 13524
3674 5183 34476 9072 3407 28343
3675 5350 14350 3086 20338 9213 25523 9524 17733 33405 26646 9261 4946 8592 5727 19064 21138 30933 1551 33027 19659 1708 32061 7573
3676 14168 7949 3670 852 7595 3678 5058 23508 9977 2880 3651
3677 10061 14115 36259 17734
3678 8940 5974 22936 14042 142 17059
3679 4492 10235 13274 15506
3680 4661 23605 13475 22029 1084 1882 3732 5469 20795
3681 37126 12560 21100 19074 2650
3682 9018 1053 23580 26656 7093 14462 2155 7787 8824 1256 7501 21630 33053
3683 26508 3695 6042 14646
3684 711 2537 20302 1504 6543 2477 715 2583 20540 23139 1240 23140 2549 17185 6060 6094
3685 28692 14404 7235 25054 4925 9285 12015 27890 10482 9286
3686 8088 18906 16879 26965 4700 28672 24185 16117 28802 16899 34359
3687 20179 3998 10282 28653 20843 18923 19189 24523
3688 16093 24774 25763 24538 23361 18603 16833 5249 20940 10736 26958 8083 37777 37221
3689 24998 33315 4495 8652 0 34766 826 6782 12829 29943 6724
3690 28483 22321 7371 18559 10987
3691 1250 10959 2245 1953 11014 18049 13819
3692 18769 3311 12688 8671 21196 27898 11000 15514 18169 14397
3693 7387 11474 27603 16798 16240 17813 35067 25717 23120 23735 27236 27923 25083 35727 20256 35881 31347 32561 16936 3355 5249
3694 3089 4675 29506 13959 608
3695 17913 7428 2766 1541 821 8753 3486 10050 81 28057 819 6027 15514 32431 7881 2712 22735 3418 860 4904 4979
3696 665 3356 1084 1121 1373 13130 9468 33383 2342 1524 9019 6465 12715 13448 11521 31625 13308 1496 10591 14459 6500
3697 15754 16367 29735 2815 24457
3698 6383 8884 2111 5790 11986 1176 13310
3699 29518 13958 10040 8058 29355 19041 25275 17132 38028 9931 10303 1271 32707 34206
3700 32697 5285 31587 33929 24709 22780 14546 2825 33246 17722 21359
3701 2081 2198 9459 14798 11643 31907
3702 6703 11733 7307 9552 14846 4865 1003 699 20057 17859 2861 13661 5283 8630 3297 24889 28928 11055 8299 4802 853 4380 18107 31203 19589 3493 13651 14326 2803 19694 8080 28072 7722 6656 7872 5062 14672 29640 30231 14319 12017 14343 13589 12990 5913 14383 9287 13027 10598 34937 37369
3703 34482 35858 33891 25029 34138
3704 2222 37250 14240 33927 6436
3705 87 8665 8058 2818
3706 16297 31795 3996 16890 13518 15987 15593 21941 97 5559 17217 19100 509 5367 496 17320 257 22381
3707 24781 18522 3972 17881 14274 17888
3708 27329 16845 22540 30533 32702 30529 26076 20932 32885 18489 27494 19914 26459 26455 16093 21377 11474 35229 7259 18923 20946 21411 16657 19950 16118 21243 30017 18602 27923 28745 32724 16658 28303 32161 19265 36139 35026 31093 33650 16296 22463 23361 19884 34711 19779 22503 35835
3709 10776 1779 1753 11925 7730 34975 1734
3710 2154 13836 6690 1871 19132
3711 33239 2414 8802 25889 25238 7943 8074 19944 4460 4661 13854 17205
3712 17362 19983 35237 19991 25102 20431 12790 18833 12868 8767
3713 3578 1444 2176 24091 7953 3770 35910
3714 31147 4314 34908 29716 6743 28848 33727
3715 16274 18987 19884 15985 10987
3716 18241 11356 11296 14041 1280 14500 14844 10777 1306 9403 1775 7737 7693
3717 14867 5690 8318 5235 8406 3490 8412 7961 2785 8656 798 8404 692 6063 9104 17605 652 19694 8332 14323 8321 30906 16605 3284 14198 2963 19614 31742 10077 4504 3064
3718 6687 12509 5487 9668 7489 5485 9016 5539 5216 1043 1831 30513
3719 5026 11074 10240 8691 25899 14183 2958 36736
3720 2751 2809 3490 11290 7653 14162 9171
3721 710 7233 3129 2902 2742
3722 19235 7310 16622 15452 15450
3723 9289 13487 3554 3637 6937 32240 19565 10610 16622 14424 11390 6795 14654 5181 34594 3647 13025 10498 13039 10446 5018 3818 28962 28981 28108 15023
3724 8816 2163 1932 762 2088 2584 2506
3725 6732 7984 738 2799 15077
3726 3062 3700 22049 10052 4862
3727 14530 9289 7892 13041 13575 10211 3574 5346 5069 9569 7587 30490 28939 8756 10605 14680 29864 25058 12910 16622 24464 21348 26571 10606 15477 6937 8578 20130 36751 34916 15480 27835 37848
3728 26557 12449 125 33 29347 4885 14520 15751 10759
3729 4202 2247 8815 7354 6306 13448 15113 14976 9702 20141 7115 10623 25236 4367 1906 10593 27984 2677 21692 8921 13744 10595 3286 3379 10145 8074 17559 11907 1114 7074 7489 9828 1187 2127 1043 17379 7 9472 13379 13381 19312 1406 13141 8369 34123 20227 8795 34522 23548 22419 3833 4661 10099 2009 1506 5826 4131 4550 13098 11964 29263 3274 9346 2206 31300 20407 13299 23534 15338 6503 6504 13754 12337 15129 12825 4961 11600 10737 9343 1521 9822 23551 23158 12776 6436 19162 14978 4225 11092 13456 11545 29156 8824 31427 13260 30910 12817 5596 7388 30278 7060 30365 10350 10591 5363 4734 2613 32321 5750 25092 7417 6443 19314 9501 4311 17150 11579 19709 32021 9380 34028 5196 5577 1620 37845 35789
3730 5168 10295 2924 35008 22087 22081 12189 22083 22654 1271 19038 4680 773 3245 5020 6643 28153
3731 34232 30058 22435 19853 18964 4380 3321 33026 36865 27799 4959 21623 31705 34859 4939 10589 11047 24454 14951 36744 23950 3784 37606 12541 5868 34935 8645 3806
3732 6436 32170 15272 35131
3733 4795 20161 21281 14870 32767 18474 11114 14283 16293
3734 20538 1576 9670 10 35939 37098
3735 28429 2188 10091 26847 19792 2381 24373 9014
3736 7960 1484 762 636 783
3737 1456 4488 13301 7199 11498
3738 437 2982 524 160 17021 28626 26358 248 34719 36813
3739 6456 2686 8849 1256 1246 13
3740 18361 7015 5560 1136 4423 8795 7016 1257 7493 13130 11672 1617 32738 13254 6982 14974 21428 7115 1062 10949 7089 13625 12403 15749 2093 10005 7126 7181 7489 2219 10318
3741 4994 1551 6134 6252 19645 845 6651
3742 4578 685 21340 6902 7425
3743 17912 8634 2170 14404
3744 11713 1964 14300 8201 24971 26198
3745 3781 8603 28445 6851 10378 2964 12547 21816 17124 5355 2777
3746 28817 34208 37014 37858 35893 29513 10296 28815
3747 10978 10700 2547 1638 16742
3748 2010 1994 1145 6915 1508 3832 26077 11732 1109 5544 19124 1556 2255 2422 19213 2148 29229 6262 5472 7112 929 7567 1985 13806 1873 1036 20755 1874 7063 12693 2439 797 11745 2026 11952 4079 4899 3311
3749 27803 10808 34668 15056 2865 22087 14936 8592 7829 22679 33697 7591 7652 9564 15439 9989 22412 860 33454 37200 37233
3750 13770 6765 852 34625 6274 32469 3687
3751 36005 11955 15937 33424 6501 31563 10751 32030 8864
3752 29993 37211 35393 24905 20435
3753 9472 26649 1590 2637 6652 2835 25889 8793 2785 4330 1717 1487 6391 762 6702 7490 7261 4158 1035 1498 23548 9861 31562
3754 17030 19180 6700 8264 1256 16416
3755 21517 19506 4787 17276 23977 18008 21610 16044 16766 3189 3432 33500
3756 6687 10651 2014 4101 9256 20284 6526 6461 8892 19956 14986 7011 11955 6528 6516 30720 9841 9010 20039 12881
3757 7944 15115 24319 14978 31199 10134 8369 6403 22431 6174 9830 9826
3758 24247 29907 17885 27108 32751 32292 32293 32300 19258 27044 37736
3759 25085 3186 26230 32712 28669 31514 23396 37877
3760 10705 22641 15878 11781 26853 31396 18266
3761 2607 19816 2321 22035 5339 3055
3762 2765 1015 87 13 774
3763 21460 11732 11649 3277 1685
3764 418 17991 153 28620 12659 466 37036
3765 1816 11592 2484 1189 1949 3379 16592 10969 2034 1053 1386 1176 7498 1259
3766 18536 20507 14807 19321 16923
3767 1317 9346 7500 15286 6575 10683 3747
3768 11540 30114 33201 19178 2523
3769 1104 12074 2547 28725 26170 1977 3372 10097
3770 4337 7792 32546 7188 1073 5536 11501 4618 1504 13472 1189 5610 14743 4608 30721 2668 33771 10133 36388 19138 19209 3275 33525 8259 1225 7017 14469 23131 11998 35152 8471 14745 1185 6102 6077 15269 2912 7786 15277 2511 12151 5143 13905 2216 6408 11326 32918 7199 11983 300 17049 7558 37518 2147 30953 9865 11324 13178 33921 31993 15317 23146 5816 36054 20074 37139 14726 2072 34671 12696 36825 12002 2188 36833 37992
3771 5209 11711 1075 7341 7822 1084 5465 25131
3772 2782 773 15 738 11300 8015
3773 902 13759 1913 1702 36643 2615 8177
3774 5294 5298 20625 36676 8045 1670
3775 25860 22517 29102 15466 36418
3776 1356 14259 11268 22064 3114 22926
3777 1961 12486 2443 1833 7567 4074 15844 11620 9904 14243 8742 13457 7615 7576 1178 26217 5826 1415 10935 2445
3778 9244 8644 9142 3807 2017
3779 2064 924 4462 1038 2523 6403 2269 23149 13866 1427 1114 1388 15262 4449 6537 13318 30908 20074
3780 26583 23735 24212 37654 32506
3781 1941 6651 21974 3259 5339
3782 2137 1887 4314 9502 715 25191 9452 28954 14746 24359 9227 24336 4868 36966 3542 31975 34322 34876
3783 19726 93 7425 1540 10425 2811
3784 11512 6070 10252 16580 6408 3425 3827
3785 11511 6500 5377 13477 927 15671
3786 5698 703 12156 3309 9368 28897 3597 3788 4993 3643 23497 19060 11892 2958 3245 14666 32006 22287 12766 3061 2858 13437 11005 5234 34929
3787 12931 6263 2000 6215 32224
3788 15944 1504 1245 2017 826 22998 26185
3789 27801 727 13031 35751 3603 23917 3627 22129 12791 14424 4905 9173 28964 7162 3784 23686
3790 10888 20245 15761 32661 21085 20823 24097 12280
3791 13213 20552 2028 1176 8252
3792 7522 15612 7534 10044 10021 10301 22656 26825 20424
3793 21170 31979 36477 10938 1415 11986 12151
3794 2602 4443 1805 12306 14577 1646 7108 8730 9789 2360
3795 8586 18175 2965 12 3483 29978 6868 5354 11397 28448 30353 7262 24452 11636 22771 7216 736 8667 15397 8403 35672
3796 20216 37181 6490 7489 34565
3797 1053 1398 1257 4443 2700 1457 1329 1330
3798 21923 464 98 21727 15361 21921
3799 30851 25399 25069 28694 25988
3800 8129 19040 7327 18805 11124 24858
3801 30125 2327 7752 8350 26198
3802 7702 8318 6053 3245 3799 2015 708 29992 8336 12770 18961 33284 23285 7239 3811 22984 9989 9287 37319 6683
3803 36600 20613 36976 36393 35189
3804 4301 821 3568 2897 739
3805 84 3489 1685 2023 3684 1717 2706
3806 17439 18795 10488 35754 19707 17861
3807 10152 3200 12220 6594 9412 7856 12568
3808 26750 27226 18337 5430 25087 24182 4000 22306 22565 33888 35330 27641 19512 32536 17303 32860 30260 17882 23219 24238 34292
3809 26029 21940 248 23852 14702 150
3810 17547 1186 1478 7112 1185 1492 1487
3811 18985 18492 33825 27541
3812 5790 8962 32326 9449
3813 2808 9975 2022 3600 13035
3814 3738 25418 12993 22593 20683 37992
3815 6401 11588 1053 7827 9469 1130 2413
3816 13814 9746 11505 18705 1253
3817 9611 16314 3968 28308 16241 27205 26145 16999 16204 16282 16601 16885 25085
3818 22905 1728 14076 5445 22340
3819 12137 2341 2116 31992 2126 14781 16370 26863
3820 8123 8136 3394 3400 934 8122 4060 4063 4983 25296 7269
3821 5439 6343 7691 6287 11090
3822 7488 1262 10786 7108 9789 12399 8909 6574 4661 4417 9858 4436 12309 8540 13125 7490 15826 1487 20566 9064 2298 4485 26213 35527 32084 32172
3823 2199 20311 8781 1656 24345 6616 10133 2458 14766 6433 15338 7491 2604 8824 19735 4474 13905 11962 1906 10593 1035 1855 20810 4399 6569 780 9818 24359 5478 1635 7428 11652 15275 13485 4218
3824 17533 1053 6433 3526 4978 12978 5020
3825 6940 13773 4509 26835 21153 6062 7878 11050
3826 826 92 93 7762 19571 17919 13035 8704 8750 37603 25613 8753 673 16381 2706
3827 3424 709 4710 7978 2782 10415 8399 6053 4904 13028 17548 6715 88
3828 777 13319 1031 1104 1524 1496 1429 7158 1134 2823 774 4863 8669 2706 2867
3829 18544 30436 826 5167 29502 12094 19190 17804 24908 22565 20287 11460 11124 36112 35360 8346 13439 29186 35496
3830 7190 16359 8696 34565 4664 20074 7629 11686
3831 1671 12178 6067 9928 1275 22087 8463 32530 34208 10907 37113 6641 8005
3832 14888 1118 2974 4258 27957
3833 786 2014 19834 2897 3651
3834 5897 12222 12226 6594
3835 5480 2074 10133 23145 15949 7942 2506 2533 20055 6398 3057 773 1128
3836 23330 11319 20854 21286 16886 16485 20849 18007 32064 35266 20949 25724
3837 15 774 891 5753 13 2210 5577
3838 22953 32563 32703 34655 20167 27307 27740 22291 27228 29930 28529
3839 7366 22250 877 16601 27980 27791 17811 20103 24431 19484 18748 16312 16777 11320 17895 884 16774 24520 16642 34281 25902
3840 4586 4866 3817 7453 24415
3841 17909 16264 3928 7371 15967 15932 16771 12785
3842 12828 31883 3497 721 2965
3843 1004 2705 12337 7774 12017 13067 17245
3844 1244 15659 13311 6398 17341 34117 35787 25356 33584
3845 12552 9295 20820 758 5882 13623 12229 12568 12223 3352
3846 7822 7150 5304 12196 23994 567 7525 592 34941
3847 8817 15111 1188 22740 5836 3728 6075 32323 13120 17407 2206
3848 6306 2685 1030 2012 743 19808
3849 496 5958 18788 488 233 230 12452 31603 16231 33399
3850 3076 13677 13793 12017 15436 4306 36179 21407 4293 15052 12642 28949 22287
3851 649 774 10347 1718 1709 3417 685 24347 8752 8924
3852 9998 28752 20613 12295 2651 5886 11696 13423 21031 6351 9044 8111 8106 9412 16400 17268 3208 7846 3215 22184 4066
3853 10133 8818 13816 3273
3854 21326 618 3468 9942 12204 10291 9935
3855 5787 1887 13160 26486 1044 8369 11986
3856 2559 13716 2049 1208 2411 1210 21261 8906 19741 38046 10441
3857 13138 19734 2541 37712
3858 14364 4710 1104 21866 30834
3859 8670 6198 11288 852 88 19709
3860 2093 2047 10668 2649 24102 12143 1441
3861 4879 20235 11959 2579
3862 10010 10303 6637 20429 37858 19055 19041 8058
3863 3654 9267 17149 14680 15447 25860 11397 15450 15452 15453 28880 851 9287 4508 32947 36818 15441 11813 13025 19237 14662 15467 15472 9193 3628 26015 5048 34344 28963 21189 28950 27835 36921 37339 31755 13274 31167 20621 30206 31713
3864 2179 3430 75 7425 3128
3865 16766 16735 16778 18948 16306
3866 11956 10133 1617 9827 26314 33196
3867 10463 33065 24456 22780 34605 24986 14679 36892 9989 35239 28898
3868 4418 2150 7489 7910 1256 5469 7273 7759 11241 22890 20657 7064 9456 11994 1077 2267 1638 1070 11607 4205 6074 25042 19219 24034 2063 13055 10317 5094 7353 9430 7210 35963 5031 9811
3869 5553 3021 9509 29543 503 16759 2996
3870 35557 35539 15791 21113 32812 18044
3871 10404 7393 6660 3485 7479 34526 1084 13475 11983 26177
3872 30334 15460 3587 9591 313
3873 30779 32374 3245 4287 22932 35622 33814 33327 24854 10706 15916 31621 36251 15867 34185 18210 14557 14449 35982 5030 32668 14448 15874 11788 15921 36879 28770 36254 14043 15922 10701 31420 33015 23925 29195 31764 7693 33271 14451 5336 36258 36257 37165 11762 36255 32675 8452 18300
3874 27340 32462 27473 11656 16348 17800 22304
3875 17113 2440 1124 13477 1256 9670 6216 7156 4667 35181 1042 1221 4471 6215 15266 25329 1596
3876 763 2928 773 3778 1535 2749 2909 694 665 2813 12 784 2902 3356 4996 774
3877 17063 10759 27001 5913 20624 37256
3878 5136 7021 9801 4621 7943 1070 5485 1238 6664 1555 17256 8912 5222 3741 7025 2523 5480 9325 1565 7048
3879 6212 12716 7496 4567 4193
3880 1010 17253 12868 8870 26633 23397
3881 6476 10125 5758 17520 11672 17687 14227 15583 15109 11093 6455 2433 22240 24846 4867 25486 4891 649 32514 35179
3882 1018 4963 2904 2902
3883 6342 12730 6284 6356 20170 15785 28919 12228 35807 9619 20547
3884 2183 6438 1605 2699 17475 5524
3885 9608 8072 4595 19181 17988 15048 20510 24449
3886 2902 2897 6926 5693 3678 676
3887 1045 8769 8759 1661 12124 7126
3888 26653 4164 1853 710 8281
3889 1146 2189 2410 3371 1492 3379 7493
3890 6621 2343 13755 9761 11498 8385 13900 1221 15011 15650 4670 8535 25190 22418 12855 12149 30810 21867
3891 2714 772 715 1541
3892 2012 8121 947 4499 23476 8692 19882
3893 18934 28454 25200 5249 21421 19525 31081 27061 29183 27454 16204 877 31385 16596 35175 36669 31084 32919 11468 23169 3152 36805 37887 22568
3894 7154 8887 4344 19134 12360 10625 6448 28059 29048 13378 6408 1504 17288 4654 6457 17668 2632 4223 24133 6436 7637 1644 6401 4225 6620
3895 1245 2050 1329 14969
3896 17086 5559 29136 418 26558 164 32526 22383 24928 9602 2988 32525 26049 28475 473 22901 28631 28471 38005 21876
3897 20195 14965 8756 14438 3305 12329 11813
3898 4168 4408 6190 4404 5774 1813 2317 1044 6104
3899 4667 11498 1039 13288 1322 1259 22329 10899 9805 6694 11511 1506 4257 28033 26387 10139 2365 8849 4658 8385 13933 10094
3900 29231 26259 5249 16654 23677 28580 17771 14514 28585 30286 20168 29260 30271 26484 17826 17798
3901 20155 19168 7386 16236 20156
3902 3378 17477 1881 23755 11904 2515 2517
3903 1616 8759 10730 1621 1845 4038 1576
3904 6599 6372 5030 5884 12285 11699
3905 6640 1271 5303 12174 586 7532 22085 29513 28817 35662
3906 4299 1908 7038 9650 14243 1487 3371 1044 2222 1640 7769 35338 7519 3667 6727 929
3907 20359 27971 6782 20745 19721 23477 28870 5876 10857 29642 31213 5376 37251 26011 37319 12329 9132 15454 8404 8932 9177 37170 16464 3072 7312
3908 21456 5921 4738 15727 17084 22819 31535 37611 34582 21999 17077 28676 13099
3909 3630 3655 20151 8300 9981 4928 3817 2826 3676 6719
3910 13199 17459 21490 10566 21496
3911 9270 24994 3520 7593 3699 9252
3912 13515 10913 31695 5278 19019 28047
3913 10390 7586 2897 30234 3678 27879
3914 7959 3510 3255 9571 1017 3259 4928 36641
3915 3132 6648 20725 11068 6036 710 5319 8333 1853 7743 3676 20438
3916 8404 2012 4500 852 3490
3917 8281 5242 4314 17915 36511 24455
3918 25516 28103 16789 2698 19190 11656
3919 27299 16661 28823 16241 35041 32783 27453
3920 24222 6621 2334 35514 32338
3921 24058 8425 8295 9493 20340 10450 5024 2022 8645 18082 9891 6043 17857 860 12825 7245 7246 12017 3592 3609 811 703 8438 3563 14965
3922 23533 762 11690 2757 7428 11652
3923 11991 624 6354 10188 11183 24099 11186 11211 6300 6289 11164 17314
3924 8228 693 1709 3069 31548 24263 3418
3925 4126 904 1480 1240 1253 7889 1438 1472 905 4158 1039 1498 4481
3926 20842 30540 20968 27236 22690 20720 24538 9637 16674 31076 34292 36380 18384 34160 7767 16321 36548 31093 25602 28525 18713 24478 37793 31086 37767 31121 16106 19526
3927 3999 16300 31793 27121 10224
3928 9761 20182 8192 13749 5137 33815
3929 11496 5127 2138 2158 15713 15318 2449 2493 1051 23761
3930 2806 1482 23596 3379 13739 1524 2199 12880 10634 1498 31199 1522 25411 15235 2109 3705 10949 25243 23144 5468 8376 1525 7509 7787 1244 909 7126 17235 17055 709 9838 14974 12825 5639 4504 8281 31898 29576 36677 12328 15680
3931 8415 768 2891 16226 773 17709 2175
3932 12 9474 1534 4325 2179
3933 4692 28815 10044 8050 28817 8054 38019
3934 8702 7602 18915 20187 21374
3935 23383 15981 18567 25984 27498 14528 15846 16539 23109 19089 27523 7369 3164 27261 35318 24311 20916 19284 18601 13433 33829 25983 16826 37335 24231 24494 19506 36093 16729 16528 30859 18883 28250 28118 16404 30314 16490 16910 22496 29044 27669 20177 3870
3936 28597 7910 4030 11672 23770
3937 22033 3253 3248 5869 8278 9582
3938 1272 617 566 6064 760
3939 11894 19698 23376 2855 5040 2023 27977 9893 5395 13443 10589 1548 22512 5381 11119 2182 29351 15894 10499 14416 14397 24879 1717 24873 3650 14966 22229 34556 8690 5845 25145 28914 13027 33191 2779 24462 88
3940 25143 11286 20130 35398 25032 18168 11636 34554 15457 28437 32366 20745
3941 777 800 9725 1916 6106 1165 852 929 2801
3942 69 20815 2855 29212 24998 36455
3943 25848 28326 16878 30713 23963 22846 16139 33652 16644 30807
3944 82 2791 785 5018 2902 6410 4308 1504 0
3945 12089 19042 1265 12186 20424 3090 12204
3946 37902 37463 28857 4509 10812 28858 4984 37904
3947 10904 29343 1318 3456 10321 3371
3948 3259 8629 300 845 4685 3438 5028 21771 15542
3949 2239 9386 11411 3069 25177 738 4426 517 28275 21920 26353 26047 32323
3950 2769 2784 771 18849 6638 36510 12169 6639
3951 15508 7435 845 25930 9484 18965 15515 9390 3286 11894 2926 19695 10080 4864 8428 1532 3142 36908 4995 649 9989
3952 814 6856 5 1532 2739 7545 5340 75
3953 19085 17943 24482 19384 21492 33125 34148 21169 34763 24557
3954 719 10508 6385 4955 9213 4502
3955 27048 27572 33940 27448 20843
3956 1245 1157 12595 11664 35791 15258
3957 3700 5666 9783 7313 776 767 3759 3529 3290 5023 7220 3064 6819 11948 28068 91 9168 5719 4166 9170 12849 3639 6773 6830 8578 7261 5001 3482 11924 23522 11288 5040 17142 5341
3958 9104 28780 7413 653 12 2835
3959 28552 23719 23714 13343 26889 25445 1792 5404 7729 35187
3960 2793 15061 34152 9551 7604
3961 7525 17132 14967 11952 892
3962 24395 3577 1534 36478 2712 0
3963 14898 3000 460 29787 26353 28275 12413 35578
3964 4064 15760 19309 6351 15786 32814 14237 23529 8097 8101 19828 28361 6599 13620 12255 8106 14123 23531 28425 15777
3965 11503 1882 19891 7182 1474 1812 4361 18675 10648 10272 15749 6433 35548 2533 1905 12058 15302 1155 2568 1526 13861 1816 3378 1244 2386 4455 23951
3966 2708 776 6725 1540 2722 4502 8750 9574 2179 88
3967 5148 7707 5319 37222 14169 8305 3312 11071 8313 8625 3817 3811 9545 8638 9145 12779 704 10414 3782 3600 13022 30406 6723 13668 5354 7235 8315 6055 6016 2938 19160 9624 3787 17607 7956 8423 4933 6041 7108 3778 11401 12891 10408 781 2865 13771 4525 7643 6813 28537 5176 9474 697 28756 790 9555 4963 8412 14332 12849 8706 3609 8626 22608 9139 7647 14183 6894 10214 11391 5851 9558 11409 8647 20148 14446 8707 9979 3426 2869 3622 11284 5026 29948 19700 4949 8406 10416 8323 3628 29946 32424 10709 20467 3612 29712 6138 1853 5023 5913 2728 24997 10411 15894 13442 11406 8394 11892 13555 9165 7228 8645 12541 6268 13563 7258 3672 5380 13590 7162 657 7335 6057 796 9584 8690 5356 35383
3968 18200 22566 21523 18724 25123
3969 25321 9822 1053 16465 23225
3970 26270 8336 17598 11407 29328 7652 12550
3971 24297 28086 2175 25337 20580
3972 35758 19880 31384 18923 34358 35874 34492 20964 37617 32679 37805
3973 13099 20714 29560 4889 25952 401 440 28866 35955 32519 32267 12415 22813 22809
3974 6020 1018 17450 28935 33079 3639 25660 4079 8341 12778 15516 8626 13591 13587 3782 11388 4963 11374 18615 13441 14179 9573 20581 17452 28075 28999 12906 6719 14435 4865 3510 28099 9981 34315 28963 27885 31051 24464 15399 25058 26572 21407 35520 14922 21208 30458 11636 15420 31755 14443 19694
3975 24351 8987 9883 4664 35527 6188 11329 9739 31883 721 715 2686 1035 4339 7629 8385 14420 11962
3976 16699 17276 24080 7380 24479 4786 28699 23438 18554 20955 18014 3930
3977 19274 11498 9818 13095 9764 1470 6309 9820 13735 14756 2099 13930 2252 9785 21155 6232 2494 15517 4879 8252 2724 11586 29048 4467 20797 3338 1401 12930 9390 17284 12933 9809 1659 8849 7184 1378 6456 9796 6970 9838 5377 1952 24330 13760 6492 6502 2380 16410 710 2279 1062 2604 8385 1035 4460 2709 1134 12855 2365 787 16585 12825 11509 4320 2019 11651 8 10642 2461 5484 10118 4359 1898 15717 4522 9836 22419 32195 1233 8836 1059 5228 17290 6546 5515 8805 9470 5613 8830 9805 10718 14297 19202 1595 18159 19224 1175 10950 11962 30111 2535 4387 8795 15320 7417 10653 12493 1560 5583 1078 7167 7489 7787 14766 17480 2171 13097 33375 31834 6450 9018 29683 1246 37624 15638 18158 31841 28023 5465 37938 33972 28328 37799
3978 88 8548 1685 93 4585
3979 7130 738 2902 22129
3980 14574 8491 2185 8901 2309
3981 11755 19346 18244 14062 633
3982 30022 32672 6340 6358 32577 7858
3983 11214 24308 7851 8106 6348 15781 12228 28921 22184 21094 12254
3984 7663 1348 13997 11776 1298
3985 1070 2559 18157 8367 37361 6942 1496
3986 2772 2221 1527 30249 1238 20235 2507 25330 1070 12493
3987 9501 2801 8692 3245 22096
3988 23232 8346 17732 9263 13591 25337 36519 14942 31458 24591 31469 21831
3989 1256 24330 18387 12820 4557 14296 2778
3990 28845 2255 28038 9913
3991 7483 6537 2546 26600 13848 2972 34596 2001
3992 23341 32549 15960 25714 24364
3993 2757 3245 9624 10590 1015
3994 5906 3483 4497 657 9214 676 4946
3995 3777 3654 17280 9553 8295 8626 10391 4955
3996 20308 9986 1130 33588 15687 2461
3997 7115 1065 10321 1189 24102 6439 19873 30279 38040 38039 11480 24675
3998 13785 28265 17643 6753
3999 20447 930 1638 2248 26723
4000 7064 1087 2699 6714 4427 7759
4001 22115 37353 676 15450 35843
4002 4455 1388 18319 2916 2482 6431 12878 7995 8365
4003 16384 8171 2017 16 3422 7261 706 8
4004 30790 11225 31137 14410 6047 25964 28910 22160 7873 844
4005 868 4862 1853 1548 1541 2874
4006 3628 693 3684 21745 6659
4007 32939 28309 24472 30445 32664 21547 24858 28117 28729 27232 35223 34435 11124 35757 25717 18876 37322
4008 2628 1145 24381 24351 5486 20540
4009 16974 16838 25770 16896 16999
4010 1361 1364 1372 14073 5413 5415 15910 2703 14146 15878 11767 15866
4011 35799 32244 278 5966 4755 33870 32573 26805 30189 34338 32330 19976 17023 17076 22008 470 30195 5973 5985 12842 32996 22898 5980 32700 4811
4012 632 5445 633 645 1281 31892 3329 13969 14092 8451
4013 3591 4904 4994 3783 2877 10508
4014 4491 1595 2410 11338
4015 15126 20307 1799 9836 15261 7416 5090 6970 1147 23944 15272 6387 15247 26327 2155 13093
4016 15819 15955 20942 35650 7377 31352 28218 18499 24952 32724 35996 36206 37846 26475
4017 4497 10953 87 0 14191
4018 17200 18243 11792 14085 1351 33797 21431 25873 18224
4019 3495 3245 3651 773 3253 786 9251 652 2803 8503
4020 10597 9046 6374 6354 24095 6347 15771 9998 30187
4021 33615 27635 15859 33744 3899 1035 27295 25321 16164 35483 22855 35484 28158 5331 20099 22298 35776 19766 36922 35030 34894 22399 27267 32867 35103 31397 24767 30735 28166 36203 25854 23599 35299 24797 27553 1130 32270
4022 11228 652 15068 19653 12859
4023 1713 4443 1057 1102 1138 7558 1056 2916
4024 12350 7399 10766 14760 14719
4025 1471 2161 7114 5790 4133 5809 33207
4026 9988 648 6659 20400 5024 5340 12679 5323 4963 32514 12886 15060 31180 2604
4027 14521 5380 10508 4304 17913 7428 8695 14391 8696 12332 816 2939 9567 5913 7357 9200 22511 5023 23285 9564 10496 11056 22147 13021 8278 770 10456 4956 15707 9986 8752 10459 4963 14679 10486 4331 7262 5024 14643 10160 10478 9213 5322 10444 14423 29735 787 23475 9569 10470 8436 9578 9989 12635 22984 19634 5398 14535 24455 32436 35348 14427 23353 29936
4028 1943 5743 3735 1813 7015
4029 15457 15465 33246 35690 30068 5024 35525
4030 33137 34547 25421 21023 33594 12567 28202 34705 35810 35190 28917 32851
4031 4581 4711 7425 2706 8757
4032 8106 24098 6336 4066 3204 31537 3447 13361 9873 13343 10186 21176 8117 23902 28552 31865 5030 8111 15644 13757 4867 13261 22172 1095 9863 2365 5027 20610 22186 26601 12232
4033 32048 30662 7917 7509 31590 8358 7789 17226 6386
4034 924 1855 10098 1797 11547 6621 11094
4035 2132 3378 7468 21267 12057
4036 29311 3849 17910 30085 3950 865 24834 26610 879 16538 24826 17818 19880 29290 27061 3974 30769 16495 30447 4002 21741 16826 16088 28383 26458 29585 16497 4004 24957 24723 37816 3189 27672 3870 29283 25290 37972 36930 30987 25871 16329 33884 15206 19776 17970
4037 35405 28821 17975 16539 30715 29658 21286 33863 18878
4038 24923 2104 12368 2397 2224 4354 1328 1527 5753 13740 5749 1397 15185 1854 6841 2506 2416
4039 3485 5319 3245 1543 19709
4040 4779 24833 32311 34363 35039 31322 20527 26970
4041 9870 15099 4651 12359 15621 17402 7092
4042 2748 3245 3426 2706
4043 2161 33092 8773 2078 35702 26936 26440 29591 15503 33788
4044 18367 2869 3787 10500 3807 10449 6732 2904 18174 21408 24452 11071 14403 28909 22781 29996 13037 31484 14433 10377 12330 34764 14443 28096
4045 20805 24625 18037 24119 15986 17351
4046 7077 11231 32365 29074 1880 1948 22593
4047 13941 1244 1144 13814 10092 4205 5212 2109 1114 1876 1098 1142 3245 1442 5266 1661 6 1240
4048 21940 310 31568 5943 412 270 292 532 97 5556 14506 174 24 12431 104 31605 17665 25980 355 12464 21599 4805 303
4049 18117 11978 28439 4181 12397 25914 3833 24328 6098 11886 9632 4661 12399 1474 8997 1524 4651 6489 6110 20028
4050 14267 31966 15866 3096 33385
4051 10584 19828 19247 9042 12531 10168 8521 8522 13640 21058 20247
4052 22108 14028 25375 8495
4053 2873 8610 16977 14864 23005 26991 4274 10837 10614
4054 2467 2559 13935 3372 1720 2530
4055 7545 8752 1032 1422 16246 7915 4172
4056 34088 19107 26353 35723 21806 398 37718 26040 4748 275 477 32331 12840 37851 17019 24051 32699 37885 16757 2989 31677 34091 33234 36436 12455 248 15359 12525 17569 15377 37954 36432 22008 425 4838 37043 3000 37956 9602 35724 36758
4057 20877 21449 9593 5949 15038 257 24193 17989 5970 9489 23109 25201 8083 28383 10736 176 61 21453 9589 21777 33044 15041 33163 21564 13109 4811 355 33556 29576 10729 24928 34293 8431 32699 34935
4058 23630 31635 28804 24474 21422 31358 17780 18573 26484 28583 34777 24140 32621 32938 35222 36575 24576 30864 19517 32504 4792 27708 26474 28393 36622 35503 29747 34353 32506 27482 18580 31352 35403 24965 37158 32577 36129 25233 37031 30024 37601 34492 37876 37838 28571 35027 29608
4059 33226 2651 20189 34157 33626 23928 16746 31129 8509
4060 8626 21974 8752 9586 15333
4061 1360 1364 20644 14014 1544 2179 714 8495
4062 30225 4747 429 3029 19 15361
4063 6419 6394 4357 13215 2618 24264
4064 20019 26900 4344 4223 10856 23566 17422 4173 14979 4560 6111 5257 1156 37817 14610 14807
4065 17997 912 10901 9096 6187 13820 8953 13832 1701 2172 2002 10674 2487 6531
4066 22679 29724 15466 19958 23493 17861 15707 14442 35259 15461 8632 22283 15440 33935 24452 5023 34859 35201 7811 19690 7444 15058 22144 35257 29053 31500 32140 12906 37292 8690 18366
4067 36574 28842 885 25804 18549
4068 3119 626 12743 12741 4039 4984 0 1256 6942 891
4069 4660 11911 19797 5239 22979 24386
4070 33749 23415 7767 34856 33224 34789 26002 23408
4071 8755 2884 29767 5657 24713 31610 13662 14930 13278 1018 18076 6059 21255 29723
4072 14064 12743 36800 32124 14156 22634
4073 21480 17469 17579 21476 34383 35764 29029 21651
4074 1036 13071 13 1251 4536 8523 3215 5885 4068
4075 14933 9288 17189 28182 37473
4076 2362 9822 6403 15302 1482
4077 4303 8316 19581 3647 7707
4078 783 6861 798 3085 8667 5396
4079 26317 8764 7559 7506 30375
4080 25633 31229 17963 23244 21489 17462
4081 14966 9565 13035 37051
4082 5011 2896 3587 3620 87 8674 3680 8278 2845 3259 8503 3804 1018 13036
4083 6174 7751 1225 2669
4084 17339 18929 7377 13696 17908 16828 27498 16844 16680
4085 19991 26742 37745 9812 33622 23876
4086 12866 10832 3486 6674 31627 3539
4087 10457 32633 37603 3253 10752 18168 15412
4088 932 8127 8121 7271 3400
4089 32002 20822 19243 18028 28563 28195
4090 30276 2199 13318 4270 9747 10931 36844 37093 12596 36076 2530 35801 1030 26185 31510 11477 11352 37970 36352 26010 27831 37837 14806
4091 5595 7405 8838 3265 37794
4092 2927 32007 812 11041 5187
4093 4477 1057 4261 5514 9685 2682 8959 32981
4094 16561 33514 33338 16485 23664 19757 32284 29465 25732 27558 16063 32237 16741 21415 25730 16336
4095 26686 1271 2921 23990 5303 5308
4096 11498 4339 6433 5536 28797 1035 10880 1073
4097 19209 15311 1805 13780 1802 2484 2347 8538 4877 8188 2304 13313 13096 17681 23555 1995 2357 15646 23556 8937 12860 24035 7296 2513 13905 24379 2422 25616 34514 24942 20307 1075 8831 8373 15651 2474 31165 1558 6500 23474 6430 19998 11983 1038 11919 17249 9803 24014 4197 15688 20624 2615 4021 14794 6546 13756 34142 2300 11496 23607 15674 13799 25330 26181 35152 36658 31544 2276 2563 25241 14779 37247 34345 34319 36712 2123 10765
4098 22416 13600 734 12825 35890
4099 8328 7435 12643 3811 10490 15400 7583
4100 836 10295 12964 554 555 569 27875
4101 2797 18763 10191 12 22018
4102 628 1346 12724 13996 34183 14071 14015 13327 14026 20648 7732 14133 18240 13155 11781 18295 15866
4103 9367 2941 75 19600 18634 1017 743 4238 6252 8924 5670 29443 3530 10415 10807 8671 9507 21354 4589 3248 4929 4381 11807 7544 7708 3602 704 10418 773 9505 19066 9372 6198 9368
4104 918 18048 20277 31213 32028 3229 12275
4105 1556 1998 1073 12122 888
4106 25610 1756 10343 14548 12954 10535 1741 15884 14497 12734 15165 7667 3112 22350 11640 33277
4107 930 21690 9883 13892 12715 20407 37180 6479 4667 9913 13477 2091 2342 24379 2562 2530 7501 7339 1315 37298 2580 11596 13930 2336 25139 26175 1189 36098 13801 3709 37247
4108 2212 10787 23607 1487 2262 4525 2360
4109 3333 8472 2517 2141 35311 12996
4110 26400 26035 233 20632 28480 4739 34289 26392 22976 293
4111 15669 12502 15672 6551 37968 6569 7826 37261 35860 20275 1254 28231 17396
4112 1913 1457 894 1256 803 2915 10643 13429
4113 17633 4301 8693 9989
4114 4503 1826 2964 6960 10191 3259 6793 783 2902 3600 4500 20510 12679 37965
4115 36176 19708 773 9335 3811 852 28719 5488 5682
4116 15784 35729 12021 37841 29576 28639 37693 24415 383 20877
4117 2641 12673 14667 34605 3545 21353 19852 22147 29955 8645 17072 24454
4118 2791 2767 2179 9578 9577
4119 15321 2604 13305 8784 1057 6434 2109 13724 8849 8845 5577 11662 19162 10948 13625 4653 11520 6433 10096 1135 2910 6558 13485 6418
4120 32201 24041 13100 6013 13099
4121 13826 2368 12304 11498 2285 12141 8386 14758 37541 36147 35983
4122 2468 8482 3275 1075 14969 1960 12397 10065 18361 6583 12520 10940 6680 1499 1104 3294 20047 6605 13847 2098 1062 14779 1500 11630 14504 31596 11508 5463 30288 12875 7150 3379 1142
4123 12381 35243 28128 908 7789 7922 6241 8271 6166 13124 6 14294 868 10248 4423 7570 9764 17290 17424 4534 6502 1256 674 9574 8 3313 9832 4297 13763 17537 4255 5124 11613 2139 2501 5570 1508 5225 8376 1038 5790 9822 13308 34296 7167 13478 799 28258 11954 2621 1062 5577 1257 36388 20235
4124 28231 4618 12882 11541 9672
4125 19922 4820 48 20876 15038 506 32545 12526 457 17080 21456 29136
4126 28565 6335 10205 6369 4068 6366 14127 3027 21453 20510 2823
4127 5885 28487 1794 14092 14041 1751 10519
4128 736 3290 3313 12634 3783 12905
4129 12276 2700 9028 20225 35246
4130 11978 24946 27014 25616 6543 31277 12860 31264 11663
4131 1310 27877 17132 1271 553 601 9483 596 10021 12169 10295 6645 19041 37867
4132 15028 728 769 8436 7404
4133 7545 2643 2739 26309 4796 811
4134 6064 589 10286 10038 1269 6640
4135 16162 21751 10048 32084 6968 8858 4490 26224 8189 2916 36528
4136 8083 24082 27715 27285 27171 24763 27645 16832 18865 23109 16833 34283 24327 31370 29260 21524 25279 23898 29538 33522 8873 34713 16630 32780 13522 19525 32491 26277 32304 28160 36082 34025 13085 37738 37811 37221 37419 25064 17880 17897 27498 28520 30387 15955 37888
4137 6901 2170 10234 35362 34918
4138 27992 23983 9965 4849 37234 12192 37427 5170 19210 36510 10119
4139 4424 1513 8792 4327 5363 15308 6242 4522 1511 11488 1565 8845 8194 13755 7631 15628
4140 27523 31795 20688 5249 20349 26469 16314 33863 16270 33864 37197 23267 16871 23769 34926 33831 29321 37654 16900 19479 18745 36548 24809 22683 25201 37657 20924 30863 23121 29281 37998 29622 16091 3999 33834 30540 36823 21277 27491
4141 16557 15975 16916 3145 18934 10986 2690 885 15960
4142 15636 30372 31274 34558 15496
4143 19864 23686 12905
4144 23551 3830 19861 5571 6108 4390 11913 9329 1506 17182 1644 11549 2379 12410 1235 12511 21716 24133 10855 6436 29845 6448 25112
4145 18015 21298 20367 16792 17333
4146 25399 16131 25988 5332 18553 27769
4147 785 2638 2765 3422 1388
4148 945 4984 20785 8124 3395 355 21777 267
4149 21999 3034 28615 4756 28638
4150 9176 19602 6770 1551 9502 7146 17452 31555 9153 33079 25612 13241 19676 14676 2897 4280 8392 13189 32191 26371 27872 4980 11288 7956 11423 14964 8399 9146 36103
4151 6818 8300 6748 14920 25341
4152 11874 37092 2590 4261 26187 37071 2056 37166
4153 4655 4627 4216 23158 30718 4653 7153 23815 10673 11545 17376 5592 10775 6436
4154 34230 17948 15213 19416 25552 29037 7035
4155 4948 9153 1039 2741 9737 15754 19816 10449 3356 12826 3287 1134 1487 14823 1157 7428 14374 12899 1264 35890 8927
4156 3555 3083 35354 30758 10452 27973 20400
4157 17 23599 19884 9577 3045
4158 4548 7403 2198 1447 13288 10993 5595
4159 4667 7631 2109 14974 26106
4160 6768 6781 3423 15519 2886 6829 7544 7547 28846 9240 7957 16602 24037
4161 10482 22782 13032 12642 29053 28012 4301 34609 15060 15466 3577 19430 33697 22412 15436 33006 25596 6047 15479 4991 715 6043 3698 28966 33004 30457 15053 31751 10465 14679 22411 21623 13259 26811 14423 35205 37248 25007 15058 30517 3525 847 37089 33265 35202 5270 30520 5387 35883 31748 36452 842 34556 21410 34930 27835 7079 17720 22147 13021 36043 29646 26014 31190 35583 13793 26012 10863 36004 15444 31753 16623 2801 6899 31222 37018 36639 5386 26016 15475 34931 36747 19908 28964 14453 37366 22769 2881 36590 34904 6060 3086 37365 36641 34934 17921 4504 22289
4162 1378 1512 799 9766 1249 2093
4163 32577 28752 10722 32836 9998 20503 28426 36341 37185 34886 36600 36861 36902 37182 18029 8104 28423
4164 18494 26972 20348 19528 23881 28388 24832 27867 23117 25124 11474 31085 32499 32724
4165 17455 15049 10475 24452 5323
4166 7828 21844 9574 19700 14546 6915 24902 9291 22095
4167 22194 23012 18010 16062 13425 12868 19534 9075
4168 1682 6903 19554 8154 6640
4169 27773 35692 34545 15444 20970 14528 25709 34723 7643 32990 22434 23732 37111 18483 23089 34007 21459 16304 3801 3174 35032 20671 7050 31585 10491 32608 14183 4010 20438 34344 24458 35736 14407 26811 10752 2866
4170 33285 4098 2632 32047 23119
4171 7939 2897 12 4311 8409
4172 7901 32269 4208 7565 33007 24755 20445 13168 30953 5741
4173 14308 17391 3295 2523 15133 2124 2103 4384 13378 5565 26607 5473 2000 15733 6434 2333 1095 17289 29409 13754 9363 6240 30372
4174 2782 3259 25255 722 3760 7233 693
4175 31716 32393 24832 20951 28736
4176 13031 15481 14223 37363 37051
4177 3355 4557 8766 22172 32126 2257
4178 26015 30464 3567 31756 31748 37562 26014 3787 15473 6659 7335 35783 35690
4179 766 8399 5685 2786 2774 10469 2851 4331 32087 1682 7176 9789 2093 1253 13293 12901 3553 3248
4180 383 21453 15045 652 2877 12019 34219 21788 7872 33270
4181 73 657 5792 2737 3783 2786
4182 3603 3642 3517 3791 3291
4183 2020 26985 14332 7314 5284 7110
4184 357 294 295 257 353 3038 12664 512 456 17570 18888 24029 267
4185 11068 20057 11226 7593
4186 8888 15880 22355 34551 28217 14126 22452 23933 18243 5435 31622 36881 10345
4187 4126 13889 3234 15128 1104 18362 18661 1176 1244 9826 2704 1524 1482 8185 9026
4188 665 2808 3356 4079 827 3247
4189 14974 9469 4190 1619 34057 19550
4190 2192 5819 2029 1881 35153 1189
4191 20433 9086 2786 4511 3649 3291 2804 1018
4192 28913 27890 28693 14436 17136
4193 21219 22516 796 10411 17619 17707 33035 19620 7110 16978 13018 9289 10053 6037 14437 28907 12689 5396 35815 6915 28997 35424 24901 32422 36011 5278 15461
4194 4183 30294 1482 6391 12645 35181
4195 5143 9536 18586 9838 1527
4196 6841 37414 11978 28722 12010 18118 12518 2381 4544 24754 9847 3372 1696 37247
4197 6753 7247 2175 3651 10390 4279 10755 5876 13662 3305 6803 8613 21821 7433 18073
4198 28008 26910 36368 37475 5865 3061 14928 17739 3670 35760 10481 28094 2883 14326 33655 30912
4199 2417 1524 9764 1070 2052 22753 17075 13906 11521 24369 2350 11738 2346 13780 9866 20176 2413 1244 9838 15652 1579 5536 9681 1067 7627 15265 18003 1635 24972 24675 34482
4200 2686 7509 11508 905 15300 13906 13871 7510 6403 12505 2533 9359 7629 1256 12143 26241 4485 17341 18338 4443 36583
4201 19271 9289 13282 4903 11636 10470 7314 9540 15473 14407 28280 30463 13039 14675 8651 17641 4791 12906 19622 9148 3670 36180 12331 3516 36534 10475 32397 34626 21408 13038 16623 14680 3531 28963 18366 34352 14435 15448 20592 21407 20130 13037 14846 24458 37572 25058 26572 10498 5396 8403 15457 15477 28909 14396 34928 30210 14677 2640 14442 12330 24464 34464 17621 4494 37582 36817 13036 37967 22157 26014 32239 25055 23501 2795 851 35089
4202 5652 3814 8546 8665 8750 8684 10820 24613 9270 3322 9566 15513 7335 15421 11394 16618 8344 5267 12990 4978 2638 8346 17861 28931 9569 6022 15476 12676 9986 9257 12985 6659 15448 36817 15450
4203 2902 8408 10114 765 2706 2835 2796 4511 7833 2793
4204 36724 1011 3355 26637 26644 10897 16019 37192 32639 37886 36274 23427 17339 36943 1014 18383 23406 21365 17855 17852 22723 28313 17248 26331 30569
4205 13763 7339 20480 5808 8366 1247 31198 2506 24694
4206 1094 5205 18159 8850 35789 30376 11956
4207 1513 7944 10096 7992
4208 31487 9911 12130 13096 12591 20682
4209 11881 27753 12411 6550 18362 6504 6974 9870 11934 9323 13381 4373 6462 31266 11541 14823 18663 14995 4198 7888 1946 5452 15629 13384 6436 2632 19162 22672 32731 2082 2081 13229 1515 14718 4362 6439 2482 13495 6203 4334 30279 13378 6417 31214 35179 26167 13806
4210 17757 24562 3352 7313 7643 8648 8692 9557 14202 15513 7241 8693 9366 6038 8677 14206 713 8333 13039 1018 29638
4211 33291 9579 32073 12015 6059
4212 23548 4283 33199 6439 34119 1486
4213 2447 10992 19541 1067 36387
4214 4769 3179 3887 16698 3173 4773 18607 20774
4215 704 7062 9682 10900 1635 2011 2172 2188 5473 1045 13723 1057 11547 9775 13125 16162 4015 28795 9343 2396 1449 31028 5485 3822 8860 1114 18155 15796 9864
4216 23592 27276 17780 27616 27097 22502 33533 17824 26109
4217 6718 2012 3245 8278 852
4218 36706 34942 33264 19864 34864 36639 9206 2741 25596 14396 2783 3519
4219 18930 25220 7377 25078 15605 31232 19080 24734 26738
4220 563 5294 1265 5291 24056 35973 996 35680 20426 3089 29522
4221 9127 17137 18100 20635 27977 8667 7702 22272 31790 17972 28980 21694 5796 11054 9552 7414 33775
4222 26825 5307 29512 9927 33330 12176 20429 8042 5305 32427 27990 36735 37779 27987 27992 8059 33741 34211
4223 2015 2809 3312 3508 11245 9553
4224 18420 1728 29255 14264 5403 34865 18241 10157
4225 18188 15976 17808 13433 29706 29839
4226 1090 1526 8376 1039 6409 1062
4227 9700 33743 11660 12309 10751 13482 30376 13863
4228 13765 10358 1447 7985 24268
4229 25453 23838 1164 24348 7627 10932 5480 13872 15667 6497 1057 22438 2598 13288 2109 1244 12592 2575 26106 7261 10135 20236 29384 22426 14758 2028 1506 11996 14463 13314 11998 12679 1259 3364 34570 3379 21624 28725 33601 2279 17296
4230 29195 33279 35620 14554 18281 36253 14099 8085 32379 15915 11931 10702 10529 36257 14269 36837 15885 14096 33366 11357 20645 35903 35133 37154 5418 28757
4231 1529 2897 2736 2737 813 3490
4232 9220 2026 9117 9244 20570
4233 1943 5775 23548 19816 35250 12307 13165 12142 1066 33285
4234 21502 4555 29042 2604 10128 7822 11992 8734 8481 30877 20066 11333 9673 9810 3760 2367 29801 15657
4235 13563 723 6144 3259 722 2796 783 2781
4236 28683 20744 8417 24855 9193
4237 7508 1426 1594 1843 2563 13759 5539 5518 5538 23893 9774 14230 14891 8355 1044 11858 14823 2044 12061 893 1887 2505 5778 11556 2577 2162 4174 14769 5480 32090 9055 9098 34559 9650 13310 25470 17185 10133 33985 37139 17478
4238 10598 2175 26569 5913 2845 4502 9104 10431 29103 16223 32606 8692 14679 5851 14453 20438 9213 33088 19209 7873
4239 1926 2029 17056 1242 7822 1908 32345 9784
4240 18195 29894 28411 3190 29618 24548 22496 31381
4241 21086 8566 13639 12293 33595 11192 30678 36619 8940 10584
4242 6795 3626 14179 3054 6027 726 3500
4243 18769 17142 29646 17857 5386 8635 8651 22162 843 19716 9283 13611 35798 4711 6771 14955 35060 34904 35354 29277
4244 7881 860 3312 3600 5023 14582 3519
4245 36898 36994 6303 6351 5892
4246 3600 8 783 5157 772 2741 2781 24461
4247 786 7545 8 649 2812 300 5927 5340 4337
4248 34723 7938 12017 18168 27847
4249 1038 10592 924 1245 7759 1260 1513 7364 1084 7151 11510 13089 20546 10134 9611 1240 35548 11505 13288 29346
4250 3245 2791 2806 2804 2766 3252 2761 13014 10952 8669 2781 762
4251 5870 4996 774 2858 2777
4252 10221 13538 9580 10481 10191 23947 7444 23493 24296 4963 8310 715 3777 9278 14371 8141 14928 813 29798 7310 15476 30744 8436 3305 31189 13035 14991 846
4253 19021 10806 2825 11634 3690 3305 8403 11056 13676 30322 4905 12671 20418 34516 34134 4502 19672 22526 17916 28932 10966 36818
4254 19321 11483 4359 1101 1983 18407 2915 2196 7699 11502 19315 1037 12912 8376 22417 7198
4255 322 30195 472 32100 36436 467 32544 435 22004 6004 37977 36635 34530 26772 37984 17577 32525
4256 2017 3 738 770 11290 16384 786
4257 4526 1038 6421 5 19737 11676 26606 13094 2344 30126 17245 9575 11503 2458 22034 31041
4258 7090 7171 7460 32486 17232 13402 29732 35789 10686 34471
4259 6527 24273 15644 14470 20533
4260 7532 619 5310 5168 2920 10039 7272 19043 839 19026 23992
4261 13026 8233 6561 9111 10461 14422 15437 10998 9285 22176 34441 13611 21357 28003 15459 20745 7335 20748 15156 14680 28913 15474 15446 13041 28963 29650 19853 35841 35257 13281 15480 3596 26113 20039 30329 36639
4262 4544 1418 10880 17284 30383 3732 23943 23782 1189 1070 6419 1904 33239 3373 4462 10876 1193 1490 14766 1656 4348 5540 6974 26155 1388 12933
4263 23545 11548 1616 4602 17182 13381 7126 22672 10945 20476 24346 1526 6476 22740 8709 3735 35856 17390 15659 33801 16467 2531 4114 5836 7037 34669 4361 31563
4264 6403 7626 24358 30947 4030 2507 15277 18664 4423 24363 24368 19209 29409 2540 33759 36386 33117 9712 2541 31857 24359 15274 24378 8827 13760 12881 11555 22426 7630 17250 9670 25666 12647 2537 8860 15266 35152 7508 22427 25138 30370 20321 20538 22429 3741 1143 4339 2916 7491 33316 1073 20074 13316 11101 29591 781 9710 13480 30373 13092 10094 34459 7511 26417 11967 13693 9653 16409 25137 4471 35789 11540 35420 5477 20302 25356 35824 4654 11510 30378 10270 8034 11963 10 4664 37139 14888 1264 35308 37845 36493 37807 5079 9834 33583 1663 4455 33196 33588 2477 30376 38035 37620 1087 36248 17254 6647 5750 35802 1123 37261 33072 38023 37311 1204 14775 14230 30834 36993
4265 23727 33641 33389 31331 28454 35402 37545 33612 7361 18446 25973 4700 20907 37874 4772 18956 13522 26729 18515 23969 24507 28452 11466 868 23729
4266 12256 10011 4698 9483 5311 8004 27989 5310 23983 5164 590 1276
4267 2686 8226 4664 23829 2110 7286 35791 2517 26170 2079 1843 11878 30105 14787 11879 26166 14730 13414 1927 9457 16437
4268 25206 31090 33903 20946 35462 35092 32723 16168 25278 26478 3922 28840 16508 21547 25987 16236 11474 36376 7377 30390 16472
4269 32380 33366 14021 33814 3331 33798 1349 960 15866 14105 25376
4270 7328 17824 18573 35649 28104 27424 20914 16599 27673 18580 25988 37622 28672 16601 20166
4271 608 555 1677 7660 4852
4272 22313 16887 26143 25218 23021
4273 21563 22094 425 21906 21924 29130 36434 3017 269
4274 773 21243 29179 16134 33783 32086 17505 20418 37105 31389
4275 10791 15335 11956 1968 7001 1065 7156 15277 1190
4276 13592 8689 5026 6919 11248 8346 8677 20346 36568 5842 8661 3605 30321 8419 9171 5188 9564 8338 7246 8343 8648 14942 8337 10893 21827 12901 13590 8305 5380 30057 9177 8690 11401 13446 12825 29425 14957 9158 7881 14851 14343 19721 11707 3250 19658 14940 8319 8333 12921 16362 21648 29633 4999 12896 8328 27856 10437 33079 9568 9126 23523 16613 10508 14921 5020 13579 8693 8667 14327 11806 31147 9890 10420 16618 844 11693 7978 14620 4502 776 8412 7162 20467 14319 9159 34733 5357 9579 8645 4937 8344 7428 6659 2880 22208 2638 8642 32455 6976 6797 6826 19960 31440 5673 22048 22050 9151 31481 7313 9576 9185 10457 5181 8611 17649 14365 9984 13575 7144 5177 18102 10440 793 13584 10862 10335 10446 7741 12015 5175 3248 22230 10800 14332 14962 8316 14445 31879 18624 16620 19709 3685 5378 15139 648 14396 8433 17914 8330 12906 2862 2179 14422 2901 18774 9986 30067 21408 33688 11636 15465 1529 5876 33629 15054 21527 27882 13035
4277 8376 2496 1172 36972 13389 21310 29035 2606 32269 4517 3832 2531
4278 24806 16740 16822 25511 18750
4279 6393 14457 9001 6432 1449 11541 37417
4280 1478 1492 9826 6501 6093 3703 7561 1253 8193 7827 7560 2609 33711 15268 1983
4281 17896 35369 28322 30533 16561 27334 15201 23601 16681 18533 7377 27579 28743 16237 31063 11474 16204 15953 16898 27913 18011 14286 9641 27850 27719 32988 28306 27855 28284 27699 3148 26259 30215 27728 22502 25998 19515 3171 26461 3158 16092 27523 29537 20968 19190 20925 31634 31064 25975 16692 19093 3865 24933 27639 21421 32161 24114 18263 31332 25077 31620 20288 28571 27076 21414 26535 25717 21549 32782 24833 32413 18330 24170 718 21682 30448 3968 25069 19776 34435 3879 27421 26822 27308 27108 19512 32938 24859 36798 37031
4282 3409 7264 4983 31764 973 632 10518 5432
4283 18238 959 18235 8668 26307 30370 37299 11510
4284 28660 37198 37596 23684 33871 30262
4285 1114 2604 9827 13121 3050
4286 3597 3312 814 8278 10832 24603
4287 13676 12890 8395 24639 16381 9136
4288 27295 20861 26237 19264 11113 27430 27067 18597 23023 20971 20168 3949 26305 27595 27587 7371 27551 27182 29606 20972 14284 30798 17781
4289 9841 6403 30364 7823 13305 1070 1412 13625 23452 26314 4180 27011 25350 1526 19735 7507 1245 7159 12929 25498 12584 11569 17244 20552 10780 26137 31114 2342 1560 33759 7044 2437 7631 1233 14243 18778 31118 17242 23565 7487 7005 25668 12709 26174 6497 2553 23189 13051 22995 8829 18538 2537 33934 2364 8817 15075 25348 31265 35059 14995 22672 4633 32028 11671 5626 6077 6411
4290 10752 2023 774 28958 2936 5398 2014 28685 8669 18243 11894 14449 8493 26601 34708 3121
4291 6418 12273 11494 16456 6578 6215 3829
4292 10790 4925 7827 36364 12629 17920 30871 4190 20533 22035
4293 5673 14439 12329 12911 12330 15449 28992 15454 7249 10466 4233 14396 3623 10241 8668 35690 33668 13032 17632 20580 36401 11895 21409 2862 34821 30500 16619 12679 17648 35259 28966 26011 14404 29053 7435 34513 20438 30353 38013
4294 5235 29365 20572 10507 30995 14435 7247 25057 30382
4295 1480 4074 1883 1803 9707
4296 34357 24731 26135 37510 3908 20160 27325 28577 16544 3849 35456 16117 18751 33378 34777 17765 32146 3189 32923 24578 21120 29890 23435 11458 36799 11460 31395 37738 36134 24489 29237 16565 17007 24488 22457 16723 11446 19510 31097 29930 16575 34330 20936 36739 4792 33649 4787
4297 11776 8506 14069 28970 6295 2828 3259 4939 12119 773 6651 1629 9624 771
4298 5285 28087 5378 21359 24453 27890 19852 9893 13257 5500 30460 12691 27979 18175 24996
4299 2902 2012 2851 715 3245
4300 4753 32522 12456 287 524 19922 311 12415 17046 2991 21941 28630
4301 2835 2879 3555 7949 2859
4302 6395 28023 1053 6636 6514
4303 773 6732 648 785 87 662 3079 3245 1445 7357 2022 14407
4304 12624 19061 6946 6028 81 12641 3547 3802 14949 88 21256 13020 8556 7594 30156 29673 9133 27965 18786 14380 17552 4802 6258
4305 6347 35021 13634 8111 23715 13335 15789 558
4306 8781 1156 8777 3379 1632 7990 1131 1038 17483 4102 7944 14983 8775 14484 17290 7489 4666 33316 7509 25667 11663 17254 37620 35789 11966
4307 1661 1607 2684 9724 1471
4308 19510 27309 7655 16634 26757 27293 20168 26528 18180 30469 27579
4309 29963 7901 1243 1263 1423 1448 26224 11499
4310 7849 753 15832 9998 32154 35188
4311 2964 3645 2883 7445 669 2176 6946 4928 6710 5382 3644 6036 28331 9221 4310 6052 3518 15755 3595 6898 4934 3567 11059 2889 9552 3290 2801 9104 7247 5062 30688 8626 8279 3639 12895 7087 5380 90 773 3699 5020 3059 9574 3493 13271 3312 3628 15433 12017 22104 29634 25587 3573 8693 17715 14377 16606 31701 20438 8012 5063
4312 890 9673 20443 20483 5786 33051
4313 14949 3778 9555 12920 14211 3811 9235 7335 8435 3291 14521 18073 8695 11652
4314 1070 2202 13 10142 4443 4654 26448
4315 5987 475 5992 26797 22094 169 12322 510 233 21938 9922 21563 14902 311 24025 26775 17040 16233 25953 425 17067 294 821
4316 5238 2632 11877 6237 5213 1250 6922 10638 1073 1329 4443 11257 1114 8793 2384 18506 9775 19077
4317 16060 29283 25290 20097 21618 16053 13527
4318 1947 25482 37319 2846 7312 25009 13446 3253 3787 14854 13032 28334 32632 18774 15452 6833 6779 28963 14453 22779 24561 30464
4319 17871 8056 7526 20424 837 574 8003 568 5163 35540 19039 12169 20425 5168 12189
4320 1567 11571 19363 1257 1471 9764 1979 1116 1506 1554 1114 22978 13866 22329 6403
4321 6562 8223 1330 8368 1104
4322 25519 9269 14422 852 22781 7872
4323 15260 1157 5473 9019 4034
4324 7506 4257 11499 5227 1314 9838 11326 4670 26603 15668 15669 37529 7545 2608 15671 6635 35179
4325 9085 883 16339 21668 20004 19752 20946 25600 23339 22257 26484 20691
4326 4675 7317 12964 9483 4687 1313 1681 17130 4681 29497 601 577
4327 10167 32598 21082 21105 29191 11788 28788
4328 8692 12601 23288 29710 11554 9119 12990 7438 23493 36460 1892 29669
4329 7593 2964 23350 729 5845
4330 7392 11803 12315 6270 1551 3430 678
4331 1073 4116 22042 1509 1038
4332 22729 23390 7368 14473 21541 8766 7605
4333 3927 16056 24521 3998 9639 15598
4334 16898 16855 26076 14286 18936 26970 33833 33876 36722
4335 797 3765 12811 11427 6797 16981 30323 6043 21831 19721 20469 22216
4336 8885 4154 2036 18052 6690
4337 4927 7749 5229 15 10494 10810 3811 20342 12449 31782
4338 8265 8252 1426 9856 6434 18654 17669 10677 1062 2328 3379 5465 5475 8195 18660 12522 13486
4339 16293 18936 11468 22733 21282
4340 8933 35791 26168 2379 24687 36915
4341 12215 2649 5899 7855
4342 19033 3090 4690 10291
4343 13201 28876 23248 9812 17459 17946 24671 25093 23207
4344 13439 3591 715 2904 3783 852
4345 10508 8690 13611 21625 10752 22130 10465 3797
4346 15340 1838 4665 17164 25330
4347 1050 15321 2153 14419 24967 24358 20538 30040
4348 33245 5317 12207 5165 8007 20424
4349 22519 16393 28921 7324 2706 4326 5322 13345 22094 496 17042 18911
4350 7621 15933 13288 35527 11961 15738 26711 23153 24375 4394 7057
4351 4803 10235 12945 2168 13277 35842 27798
4352 22543 33560 783 826 3253 3063
4353 2022 4332 6657 13589 15446 13650
4354 22231 30928 3626 2835 6781 26378 8690 31641 10456 789 25011 12849 3074 17706 3248 9235
4355 1862 26660 3750 8859 9822 1496 8810 10832 13684 32126
4356 5771 11592 5811 13932 1031 3269 2079 20053 9457 1203 23124 1558
4357 2178 1837 7780 11353 9818 15310 4257 7202 1476 10634 1492 1317 12932
4358 7550 1412 2465 902 9654 13288 10649 3684
4359 1930 2256 7459 1256 8488 11351 2397 11293 4152 8360 5747 26161 26179
4360 3795 33484 6153 5021 17685 10799 22154 22676 22150 24622 18968 8652 12600 6830 2170 17702 26869 4498 3809 32370 22548
4361 8341 2170 11435 4932 8403 10240 12865 13028 14407 9278 25860 34859 36906 18173
4362 32874 29676 3516 6156 30741 14404 9277
4363 7759 8793 4893 1249 1630 1245 19816 4321 4102 4257 1119 6166 4401 11960 26096 24365 24363 28725 15622 35894
4364 12240 8109 12229 12564 12296 11140 27782 13622 12280 33954 5027 17998 17437 20828 8106 10188 13349 9873 31662 24748 33134 7839
4365 10595 20602 30315 26794 14462
4366 683 2895 768 3600 4498 814 6036 5861 16604 5489 2835 2170 9192 7312 6720 14911 7595 2898 826 8750 5692 4978 703 7881
4367 1541 29841 2019 6159 3421 3492 8649
4368 19430 6860 9585 33272 14160 15479
4369 814 3695 6773 14389 7184 17649 5103 7508 1524 16585 2474 20307 17729 29993 10481 7643 29055 12905 19592 6910 3508 7895 32990 19325 2640 6717 6729 17716 1532 15433 704 5069 14383 709 15446 2951 15138 32642 33194 903 10690 35842 765 6148 31511 36490 32792 36028 2730 6873 19907 7636 3717 26224 37549 8193 18537
4370 3918 27193 30762 703 8287 3784 37281 8687
4371 6542 16585 5266 33151 7882
4372 28632 26360 32515 33 401 22010 29136 5976 22378 28472 34338
4373 4654 1097 10900 2047 24187
4374 4399 6233 1619 4631 1121 9788 1128 4893 4892 10118 10949 9832 33258
4375 14420 23131 20235 5465 15277 26280 4034 34305
4376 1297 3125 3327 1728 1792 11767 14062 633 1305 11267 10985
4377 17698 4991 8665 2845 10395 5380
4378 23451 12393 2244 25933 1847 2192 5511
4379 5666 3239 3554 17709 29971 17446 20589 21228 15523 25609 27847 24872 10346 13274 11386 28073 25590 8655 7643 10607 34309 15059 19430
4380 771 2902 2014 2724 3045
4381 29721 3376 11441 9884 13181
4382 11382 5492 8696 19698 981 3803 8668 3616 9569 3426 2803 10752
4383 13386 8399 5685 6202 75 4711
4384 7652 22209 32032 10394 32617
4385 14402 7228 8849 35671 24708
4386 3626 21340 3686 13961 3309 9890 14327 26991 22262 6659 7249 26480 21857 16920 29387 17744 3482 3324 19698 6921 8634 16982 34380 14942 4802 3583 14204 14940 2901 2959 3245 21831 25001 14167 18122 9556 25170 5380 7079 20225 15096 912 11892 9892 16616 1089 10755 6925 10463 6797 2883 4502 7336 13282 35020 2782 16384 14656 2739 30207 13039 22167 9291 32039 15457 6931 14436 14415 36040 17117 8143 22231 20133 21237 9139 15516 29270 34519 5389 29641 15056 4032 22438 37248 5906 12865 1935 23040 12778 15449 30753 11693 37782
4387 18958 25873 36841 12950 33726 962 36412 18279 4709 9873 30290
4388 16063 27189 16780 30428 18861 21286
4389 14244 19149 7783 28603 11478 17417 16580 32511 20361 25916 6411 12926 20475 4349 13120 35246 26935 6081 12360 33434 15272 1243 30168 22203 35696 18846 2141
4390 13692 23571 4087 6928 9285 32633 29955 22412 20061
4391 3376 17298 2162 5803 1212 2545 12074 11630 17542 25865
4392 783 762 8831 8197 14758 15687 34575
4393 24332 6231 20796 13173 14468 23187 13763 33421 8558 2321 30880 2367 14823 22893 7277 4178 9909 37688 2152 20478
4394 10066 31888 22873 2321 15312 35795
4395 7679 1351 26286 34866
4396 37307 28512 28534 28497 33744 28529 28533 30429 28222 25854 19548
4397 7365 17834 21135 15990 5071 15986 20231 17789 16653 20953 15864 16652 20206 25673 6326 22567 16180 10986 29747 24796 16345 26060 18860 21411 21672 17868 28656 27418 20919 18017 11114 20084 16270 27050 22682 19759 16258 16326 24471 18480 22537 21121 28240 23049 17979 26966 28382 16038 27186 29584 9633 27298
4398 16935 15307 14240 20452 13318 37413 1144
4399 7796 4106 8376 6240 19222 6523 24332 26602 27901 4401 22202 9223
4400 904 24848 1066 4126 4257 24269 2054 10642 11525 6497 24283
4401 22875 25224 31907 4379 29384
4402 2664 1910 2317 25043 1639 7550 26094
4403 15408 3502 14441 15054 20264 32633
4404 29214 10490 25113 22246 13026 35812
4405 1934 3524 12944 1017 3483 1541 4963 4995 4501 768 8645 3603 8232
4406 32661 748 6348 20827 34772 30098 2014 4071
4407 1091 5513 7539 2684
4408 15636 22426 4257 8828 30377 35019
4409 9411 3208 11698 4685 2646
4410 5613 30125 2134 20310 23354 10655 29342 10057 36145 29683
4411 3884 11445 3879 16084 18496 4793 16707 3972 16258 20120 23345 19494 18484 18514 18452 16719 4772 23965 28309 30131 16862 13083 27448 16677 31344 35732 24162 22539 30133 23110 30137 13531 18288 30389 25201 21413 25278 31619 27518 30835 27498 30767 26965 32499 16697 30480 26455 16028 7386 34359 37741 36935 36794
4412 4337 7572 2270 22392 5818 32126 2779 10563 35895 2718 7357
4413 14337 9502 10425 7881 15112 8503 669 22196 8696 3600
4414 7963 11072 18367 34096 34594 13589 33925 14543 11229 16251 8343 8414 26874 28870 12935 30408 35815 13041 22950 15436 28999 34521 2802 3797 36818 3250
4415 9572 2783 2907 2772 9989 9501 2778 8657 11290 12859 11652
4416 6687 3 8537 1088 5521 25929 26093 30591 9838
4417 676 15 33276 93
4418 29056 29521 19034 29061 12169 36416 29518 25876 34209 32707 28815 6643 36509 23995 23894 5303
4419 11663 36077 30592 31127 30834 24343 4654 8838 24697 35788 2262 37426
4420 5136 9788 14233 901 11583 1632 5471 1624 14296
4421 9574 10569 8341 5057 9501
4422 31852 14512 7534 12180 10292 35662 29803 5317 36735 838 9949 614 12109 19041 27992 34209 33741 29377 36509 31930 19046 37223 576 12196 35973 32707 37819 8058 28106 1668 10010 2922 15612 835 24057 34210 32429 38038 4706 833 559 23982 7527 23983 597 17982 10296 12089 23990 36416 28820 984 10014 34206 4680 5161 10017 27819
4423 16041 23963 20804 13521 3148 20756 16681 16022 19479 16905 23673 18745 2696 23960 27436 18041 22828 29759 26076 26456 28305 11474 31361 32284 33338 28103
4424 24897 22412 4083 6278 14428 16226 6272 3647 29994 4079
4425 33833 27498 14282 33600 27720 27424 27496 3974 25201 29162 24757 30275 32774 25290 32146 22727 21420 17805 34979 11124 3950 32938 20127 20972 29607 16677 28227 27854 25279 23175 16088 31369 17798 31321 33735 34492 32780 36026 28839 36750 28529 3189 18737 3940 27744 33737 31965 5249 36802 37517 7356 18527 37631 20087 16905
4426 8436 23292 22679 25056 10482 35520 35202
4427 2604 30077 17924 20235 6433
4428 17649 6896 3637 13243 17644 14656
4429 36482 9595 31134 36773 34140 33970 12466 34192 487 36168 21454 21755 380 34094 36778 21808 33963 21565 37786 3030 37757 359 4763 28624 26356 28643 37870 16928 36498 31565 37386 12473 30200 4725 36780 36497 32519 17077 15370 37933 17083 34507 4886 36779 17075 140 32214 36774 37873 37977
4430 92 7597 15421 22154 6800 10806 18766 9553
4431 27605 27333 20118 27354 16890 13082 20349 21682 16657 23079 18499 21411 33736 657 2014 28499 35922 30268
4432 1073 1481 7341 1069 14239 9403 11797
4433 3325 4991 25708 29855 36790 20919
4434 2260 14808 1624 23837 34900 33601 15089
4435 3651 2804 2815 2775 12827 826
4436 28755 19945 7632 33602 9674 6492
4437 33892 29612 16923 18154 18431 2496 14775 33583 2678 37497 33584
4438 4621 31273 2482 1130 7190 1035 12647 2512 32512 28725 7491
4439 8355 24378 9018 24367 34559 26328
4440 2022 3307 674 12312
4441 4876 23525 10588 8181 1211 11717 13182 13478 7297 19793 2143 12521 12486 11231 14777 8480 28055 3363 2004 1890 9432 11713
4442 7942 22418 20277 3539 33552
4443 30824 768 5271 9950 6640 19043
4444 35066 9288 22964 9169 27891 33066 23686
4445 7114 8152 10100 8843 7489 30027 771
4446 355 14987 15035 14898 10758 5952
4447 29619 16188 34398 16486 29235 25204 32781 23172 33579 36227 17325 17889 30413 35055 18947 23964 26974 17879 22705 27403 25779 20103 16877 16173 32776 29708 30090 27132 15616 19767 19776 17823 37626
4448 5237 8774 5239 9857 1087 8773 5469 11672 28596 30178 30376
4449 31743 5473 2222 37187 9674 26759 34459 29721 1156 1828 6508 18315 12708 7253 29477
4450 21635 2098 13 6682 1259 11486 2624 2298
4451 2020 22200 26863 34105 12856 30953 8559 37837 9909 773 0 7297 33560 676 2343
4452 16835 18923 16726 24209 16292 16601
4453 8483 28064 11852 17297 11101 780 5364 3129 12403 25089 1242 17284 23148
4454 34280 10736 22369 20352 15190 1011 20351 16496 18488 28027 17581 17498 25047 19077 34147 21488
4455 35433 24409 165 37 12018
4456 9504 1019 2956 11 710 6717
4457 13589 8412 7335 21844 9893
4458 665 28917 32654 32810 3194 4787 5396 11226 8517 3045 9501 4722 1367 9879 34928 3317
4459 18163 34916 3312 12907 5024 23920 16251 5683 29275 4280 8704 15057 5063 9177 3603 15449 3621 15444 15453 35170 15445 12630 14825 9564 7163 14442 7892 28880 6722 3309 9498 14195 10465 10474 19960 13033 35541 4955 35024 787 21407 5354 4904 18123 14423 3597 14454 19701 19844 29053 6042 3545 25860 35692 15448 13037 30786 13035 14397 12985 11390 7964 14396 26569 34344 34594 37552 36751 12935 6044 24559 15053
4460 15 14642 4163 2786
4461 2093 5012 6291 5361 8920
4462 31838 26857 36821 35134 26523
4463 20168 26462 31077 21668 26970 11475 31082 18259 26076 31384 20942 11474 19883 30445
4464 2513 2594 8385 2515 2571 26171 2374
4465 18178 18866 24981 19776 37626 3918
4466 18923 862 24810 19753 13841
4467 13566 4506 807 31884 13019 1015
4468 11098 923 7508 20307 7636 6565 13315 29055 5397 19592 2842 12905 4415 2951 3717 4395 24685 3726 32642 1423 19907 26224 37549 2247 31511 1046 2604
4469 26344 22553 359 18887 21921 14705 31972 149 30992 15035 19112 15543 536 4828 30196 460 5554 19922 21939 306 21964 21781 26035 9591 249 9516 6012 4806 9645 18886 464 31851 32893 15043 6005 13106 495 21448 28468 28462 367 21793 22010 21991 31733 22976 24053 3031 12019 21755 16228 12453 35226 26393 516 21564 32214 21926 28273 9970 12840 15047 26045 30198 3000 29133 29141 28623 512 36 28862 21453 26356
4470 3287 1138 8945 3456 13697 6563 8473 13672 1706 16430 6841 15115 1330 2147
4471 24639 7545 7719 14190 12628 31550 9218 8340 22766 8644 12633 18978 13769 6038 9258 15692 17120 12643 12614 20576
4472 29985 8294 7879 12155 2827 24039 24455 35888 13784 5186 10395 10481 32898 10316 20593 10598 23686 2846 19906 10615 18175 37364 5271 37137 37961 9975 32446 25860 37366 17915
4473 4936 10504 33571 12640 9248 15058
4474 30638 12597 5069 7573 9240
4475 16770 23819 7657 23345 30581 15966 21542 15201 33834 33501
4476 694 7233 4301 5913 4237
4477 9569 23265 7371 7658 10569
4478 19446 3865 13206 17970 34292 16240 4781 14406 31884 2741
4479 18434 17341 11547 4453 9316 8928 1256 25356 24331 1087 6647 7489 4662
4480 10259 659 11983 1515 10138 1105 37872
4481 2148 2262 8182 2161 4139
4482 29796 3670 11390 29055 14170 16619 25116 17632 30758 10240
4483 9574 12901 3574 30941 27797
4484 14554 14559 35438 35621 33637
4485 2742 4301 3629 694 2737 4326 721 2897
4486 30969 25771 25770 3939 31917 29250 27516 16482 17652 24164
4487 11315 15631 12772 15512 1529 6128 28009 29991 29953 31696 4953 15163 21834 14425 36057 24585 8336 7811 15705 15692 12849 14436 26817 9581 30697 34392 21138
4488 9399 19798 4349 14457 20013
4489 32028 20013 33994 20039 6115 2081
4490 10553 14065 10513 14124 26492 7682 14266 14107
4491 3088 5164 2734 18174 7428
4492 4936 1826 4991 709 1534 9501 7270 4331 947 2179 1541 656 2803 34476
4493 26971 22730 24953 20951 26485 32881 27731 15619 21670 33498 23056
4494 22987 26990 2873 5711 25607 29670 14 14563 9141 14854 8553 13612 12688 19672 5021 6059 33715 7702 10214 8346 10209 12637 6915 9214
4495 30351 2737 675 8158 7573 7273 14620 4863 5684 671 21306 3626 5232 17972
4496 4503 6722 20594 33695 10831 26789 27885 2015 14201 8654 11432 8644 2012 29223 5496 7434 20582 8415 3312 3651 2175 14940 7249 10508 31147 14215 14415
4497 1049 11459 24824 16942 9081 18986
4498 22380 21564 31677 5923 8022 296 383 26364 34678 33970 29576 34091 28632 21453 14520 34294 22827 5110 17080
4499 25241 31180 2467 23152 9818 31127 37254 24942 6487 37247 26006 20552
4500 5384 7652 15457 26571 37034
4501 32082 1317 11983 31691
4502 22537 16080 22733 25787 26974 16279 20118 32413 19764 16886 24465 21682 16109 12785 20231 20896 24727 21664 25083 16022 18789 20925 13528 16819 19515 33178 16053 29751 16678 28302 880 16012 22727 19551 18864 16006 30551 32222 20946 26535 23586 16169 15966 25399 23309 3193 32721 27560 26979 18987 26970 25070 8083 16240 30851 32169 22540 20672 32773 26965 20710 19522 26483 26454 26485 3907 30390 16694 25600 19752 32722 16056 29760 22256 31062 19256 25996 31064 34126 18901 23174 25201 34146 4794 30863 28241 31795 23957 32219 27666 28451 31349 33205 32783 28842 17442 26462 35162 25278 31321 18481 22840 11474 30981 35057
4503 2254 8355 1071 35120 1256 24345 9764 12493
4504 24352 31115 14766 5685 10900 19225 20311 7166 11894 4189 5485 17290 9019 14775 30061 10969 30367 1899 20077 25387 17249 17224 6166 13317 33583 33053 904 31688
4505 1532 721 93 8 2941 5504 8281 649 1718 1682 87 37882 31790
4506 10845 2087 4030 9534 3524 8474 1816
4507 9717 1968 22261 5484 1121 11326 1515 13892
4508 9461 20443 11351 20480 12151 5746 11983 2493 10133 4661 1031
4509 3059 8341 12937 22948
4510 24550 15613 887 16020 16048 25975 27261 16838 3922 22840 33941 18934 3860 20956 22730 15816 20957 27376 3148 29250 19529 17786 29529 28326 16011 16236 28672 31336 18455 16045 16049 17970 28303 16897 25086 30033 5249 6325 32393 10735 24534 30447 16975 23600 29706 21287 9639 22499 27699 19512 3183 27505 27050 16821 31619 24953 32497 19119 18286 22751 25082 35229 11124 4010 26469 28654 27765 17009 27649 24178 25219 31724 16498 25785 18990 24810 24170 11466 20884 31476 29281 25279 24553 29530 19753 29537 15616 32056 27585 30389 31962 25201 16702 19951 32871 34398 27641 22846 28836 33831 29465 34810 17735 35923 21421 20805 32566 11475 35768 27666 29837 30448 19880 3945 8082 36404 37334 33783 32568 29313 33735 27322 18387 37236 36129
4511 13900 13482 11956 20311 10780 36914 1172 2523 8183 32118 17208 9871 6208 1318 781 8764 10644 5619 23569 9014 25668 4543 15657 22123 8376 2684 11488 1035 5536 14418 7901 13854 7630 9456 9007 1906 30945
4512 10757 24007 459 12649 15382 425 17572 12416 485 34597 13101 392 341 426 19110 32156 12527 24020 14901 430 23851 4723 32130 22823 29575 37048
4513 3678 11422 14204 10199 33252 4326 703 5860 3239 5506 3084 789 3076 6053 9129 20334 24713 26830 12775
4514 8336 26380 7643 19721 21140 19292 10456 9281 13582 11650 23744 16618 13616 25943 8334 3482 13774 15706 10998 27900 5868
4515 6386 4631 10941 1918 22664 8732 11753 1919
4516 15283 5570 3294 11912 4098 15099 9794 2081 11741 17674 9863 15118 10737 13377 14480 8998 9021
4517 1803 9026 13301 1104 14779 1792
4518 4337 1590 1135 1139 11600 10653 11759 11508 13754
4519 773 15 4936 8287 2706
4520 20895 3992 23690 16908 16132 3983 25597 36675 17818 18580 29293 29741 18557 23381 18544 26585 34248 3914 18520 21651 35995 25082 4704 24217 21420 31098 16671 16706 2693
4521 13620 15790 10148 636 3206
4522 5684 6659 17723 3651 9892 1031 929 1513
4523 8433 24241 2739 1003 2788 3088 9603
4524 25717 22750 9609 18581 37958
4525 1683 2652 16396 3209 12566
4526 3918 7259 19083 18811 2692
4527 9559 2734 17609 14404 35195
4528 25221 16320 13436 23348 16053 25065 18990 24536 27400 16520 25504 34689 18554 20349 31716 32393 23178 23329 34699 16005 36210 27927 11510 15681
4529 17562 358 26399 2977 20872 26559 15040
4530 810 32785 798 795 3245 12117
4531 4772 9611 26756 16835 16571 18744 21584 24775
4532 17623 3601 24924 3686 6911 24635 5050 14183 12601 22105 15492 15418 7434 14211
4533 20657 10766 6687 7550 17543 28281 34424 8964 20665 10975 7309 4891 2052 1882 21509 11330 8742 2307 11517 3364 10657 31117 1806 5642 36213 4535 8933 7276 31975
4534 23490 33936 10952 22544 37475
4535 852 2182 5172 7227 3773 4905 3512 5061 7312 3594 5913 3311 2731 4305 3518 6044 2963 3606 5046 8405 3608 28537
4536 76 8201 33524 9614 37415
4537 69 2765 4979 4101 3783
4538 5580 11599 7296 10317 9057 7125 6387 33908 15935
4539 21747 2858 6743 34301 34370 21341 32442 13015 5654 32037
4540 15860 4730 28818 5164 1299 18704 7158
4541 8704 13372 14397 14394 4332
4542 2635 6835 800 2023 785
4543 6543 34143 4667 6436 34873 19128 25978 4178 1190 6508 927 10778
4544 15420 3647 15443 9577 21194
4545 36743 13738 2972 12724 12803 34568 36915
4546 826 4613 9769 14417 29881
4547 18761 26053 2819 2805 13002 18630 669 12679 22201
4548 595 596 833 1669 9941 29523 7523 8464 29506 23996 19051 5306 17872 3472 29058 33365 5312 8047
4549 649 762 73 10752 3258 11651 27834 6653 6159
4550 4990 0 711 21154 4995 1531 2709 706 9987 4727 16979 11355 82 31494 17915 2637
4551 3367 2602 11994 1810 2377 2292 1509 7394 3385
4552 5916 15045 8431 15046 20877
4553 3090 19032 6640 598 10044 838 12959 23984 19050
4554 10429 24860 9553 8645 18791 3797 4939 7712 30140 14866 6027 12017 14582 690 9569 4953 10998 17445 36917 10488 4933
4555 711 3600 23743 1541 2815 3259 2801 5012 29933 19568 3647 2751 4791 20026 766 9503 1718 3045
4556 13749 23558 14752 5874 7354 14978 7582 4319 23355 6433 1513 10900 6442 13308 33815 8868 8717
4557 17347 25392 19414 17935 15229 26323 26082 25836 26130 13203 21500 26436
4558 2170 6126 30940 14546 34918 5697
4559 10128 3377 1927 6231 5743 9614 11333 2116 25814 27752
4560 2017 1935 28138 35200 79 2886 5489 15454 9498 8597 30209 88 30342 3628 32387 9263 14166 14318 32126 28056
4561 20342 26712 12501 2283 9521 82 2083 3252 2229 13757 2112 13801 12027 13824 25470 13948 13822 2053 37744 12998 12715
4562 33621 30965 23258 21492 32595 33323 23260
4563 2012 28446 18082 9893 4971 4274
4564 3684 8579 4968 9556 3562 28756 5392 10417 14333 13030 14543 23617 14679 29123 21426
4565 11368 942 8125 8129 7270 608
4566 812 2748 14373 24370
4567 3430 774 9501 15 8586 9153 3510 821 5319 10208 15474
4568 1073 8959 6403 15722 30916
4569 31641 12626 9989 11056 1935 3642 14375 2959 1538 9893 3647 743 31183 7210 9577 9986 5492 8988 14426 34253 3817 9155 10488 10496 9569 12014 10463 16623 3259 3625 12783 3614 33351 9582 4994 13611 12901 5395 783 7428 8427 30756 18669 22412 12613 6915 22411 9013 20438 14424 14454 10468
4570 13146 11772 632 3096 13371
4571 1165 4270 26476 30391 19850 10752 1718 768
4572 9816 10718 28725 34199
4573 21413 25083 19528 25204 20349 26535 25765 20231 18259 23600 16237 29249 30390
4574 6635 4668 7631 13779 11016 24388 1398
4575 30733 4599 26359 8431 24043 22380
4576 2680 1128 9092 1346 35683 3722
4577 10644 18049 803 1258 11510 12405 1324 4553 4144 1136 6702 1519 4328 10634 688 1145 29158 7151 15655 13734 1499
4578 2706 79 11894 693 768 12017 17862 12825
4579 25677 15635 2530 7507 1329 1035 31841 7491 3714
4580 25201 5249 36355 25695 15607 19453
4581 27292 16320 11124 18557 27558 27870 28853 36616 18997 16018 25086 19519 29204 32236
4582 8938 20064 20223 13738 13842 9028 6095 9414 1462 3723 3371 13846 10336 6505 890 13725 4429 35287 4646 11498 31445 1156 6481 1431 4602 33550 13226
4583 15 3259 3760 10952 3510 4503 2858 9501 36533 10208 8667 26572 2897
4584 785 12946 686 1682 15
4585 165 9915 505 10630 134 24045
4586 16778 22838 24721 17786 20941 21553 32676 24231 23071 26530 26454 30133
4587 6974 1259 909 2014 1018 29119
4588 4555 1062 17164 17236 2224
4589 5319 11056 8695 1532 665 3245 980 3130
4590 13477 1164 1179 28258 29038 6388 33552 11720 7100
4591 826 31494 32144 11470 17761 11465 3876 37309 37401 23664 23431 33835 33111 28492 37743 21124 36144 17749 36964 23083 3848 7364 33733 25718 3844 36426 29929 24510 28493 19779
4592 32098 36910 36496 37048 37765 34588 36773
4593 36768 14709 28274 21973 29571 3032 12659 15038 21722 37851
4594 313 30195 23890 3031 21999
4595 16038 19486 16478 17829 16501 16567 16971 16843 24203 16483 27407 18860 16510 20900 29530 16261 21122 18007
4596 1647 13812 1519 7187 1145 1506 16162 1558 1245 15716 37843
4597 13277 14930 8640 8677 4976 15418 16606 8404 7335 8421 14432 15461 29053 5323
4598 3076 13588 22679 6826 17707 10240
4599 2044 1616 8189 34877 1035 4320 1115
4600 14953 5726 7811 5799 25558
4601 799 2596 7468 23891 27032 1244
4602 35055 27221 32295 23388 26970
4603 14244 6444 8210 19129 33483
4604 657 2714 0 21527 8172 29575 34285 3002
4605 26473 26485 16022 883 3998 25201 11449 23078 20957
4606 3958 22704 21619 16636 20721
4607 8854 30723 20308 31201 10649 6504 6557 9632 20536 12149 15277 12151 6518 28041 30891 32060 4366 9346 23782 4608 799 15260 4610 10857 18308 8864 32023 34776 37079 2972 13306 15945 22040 2365 30834 12328 31563 30104 1487 11966 32028 1031 31214 6489 5376 37686 23189 659 34109 26224 7065 18654 26113 34122 4403 11505 15684 6503 32030 6215 26167 8908 12756 37357 4667 3747 6564 34874 1316 4602 10252 6070 6443
4608 3524 5018 4796 4919 7215 4939
4609 7446 15604 762 14254 34556
4610 20780 27298 16179 10207 9609 23338 27314 6325 27253 27486 3352 23796 27313 23398 21679 21538 12281 20292 18834 15191 4557 8517 3206 745 23674 8031 8875 23710 21582 16241 22727 9528 11466 27378 27384 27425 27387 6342 27288 15818 27339 27363 27395 25856 23052 27320 20088 18919 20920 13337 24073 3146 7363 25778 27448 27377 27403 24433 27224 27436 19266 27447 19089 27449 18544 16717 27460 13086 23799 16237 16019 23079 26259 19512 27526 3196 18263 15619 22848 17823 24169 27611 27584 27674 30255 27676 28810 35255 973 27702 35923 17276 27231 27716 25065 27483 27595 27636 27420 27710 36273 32536 28393 30652 30267 36681 20354 36081
4611 1120 4473 2064 5364 25190 4257
4612 12306 22601 19858 6215 12137 6235 20882 15324 35743 9670 17616 2191 13478 36583
4613 3817 2864 18965 5320 11403 5322 5020 9244 33544
4614 2964 13684 8757 18790 20510 710 4503 5324 3593 6648 7934 8693 12679 6147
4615 20137 2109 9464 13301 7 1061 3708
4616 22737 7787 6077 15272 16743
4617 31539 12474 20876 53 26047 26392 445 28365 34718
4618 21136 17761 16212 26237 26455 29303 33496 27437 20928 27665 24159 20168 21414 3958 23104 25221 29381 15847 14296 27489 7369 28303 27603 34655 27586 18345 20118 11124 24953
4619 30280 11365 29263 1570 6507
4620 17442 22509 27851 20932 25065 18194 18605 20838 18923 18330 28302 23967 26462 26970 16063 23600 33275 18494 22538 11475
4621 11124 23342 37325 27243 22828 37640 18499 31390 32568 32561 20209 25083 23117 32953 15862 33206 27036 33686 23066
4622 17228 1163 11664 2271 25362 9850 2866 2179 4633 24316 13 2141 30880 1070 12307 1818
4623 19786 16696 23968 20951 16005 27720 19266 16601 28244 29200 32881 37012
4624 29731 13089 20118 24976 27321 17886
4625 93 11124 16762 18466 25729 24721 21673 25291 3189 29607 20389 4007 9402 3651 27024
4626 23267 21411 27070 18936 25603 6143
4627 22776 24454 10395 9893 4094 35813 34503
4628 980 3259 2938 7425 737 2815 3085 3312
4629 8916 32063 18967 30587 31540 29694 11059 18089 3767 15511 9288 3526 34276
4630 11830 9860 11745 25198 1051 26764 2082 11824 11014 13051 20221 8921 25238 773 21623 665
4631 2602 6170 2298 2533 2630 11962 8858 7402 2352 2447 23582 8357 22863
4632 25895 3695 3625 3603 19576 5108
4633 2709 15022 13769 36730 31494
4634 2242 7501 1176 1066
4635 10478 15516 10373 17921 21144 10475 32791
4636 25175 14919 8419 9558 4312 10390 13560 29938 13274 23508 5869 8412 10695 8279 8327 17698 18364 3800 21823 3490 10893 3701 25660 9983 19653 10489 771 2019 12825
4637 1515 7354 7135 2463 1516 1383 1517 7501 7995 12878 1253 1438 15669
4638 29529 3156 31672 11466 26961 16035
4639 2596 29736 8933 14748 3236 5469 9426 1706 2526 13184 20223 12855 6695 8905 2262
4640 9244 4963 5383 5649 11286
4641 2015 5274 12911 9573 10411 13771 13025 12906 19470 3602 11401 25948 21527 19722 35383 3290 25010 11892 9979 30926 15450 21695 28068 17632 8305 15470 11387 26308 10510
4642 10240 29993 35940 25801
4643 3783 3678 773 2897 2797 2014 2179
4644 12186 555 1267 567
4645 9168 1710 2958 3667 669 11033
4646 1876 12574 2580 9430 16648 30948
4647 8657 11 4305 31223 19629 32085 34469
4648 1345 13973 1766 11928 2703 15870 13155
4649 25070 27154 17302 25213 23706 26475 30391 35650 25084 31331 26963 16719 29537 19950 35879 27604 16538 29186 17735 34292 31380
4650 842 1547 1718 1682 5504 11300
4651 10668 14302 8828 13317 1457
4652 5182 6048 22286 17641 7957 17709 6044 28913 20701 10498 24455 22992 10464
4653 3259 7051 3493 3062 69 737 87 2796 2927 783 786 9501 3490
4654 12642 29649 10487 14965 5492 30698 21410
4655 1532 2776 3480 10080 2784 771
4656 3606 5175 21138 5365 703 6659 13025 29446 13036
4657 20967 3149 29778 30390 28454 35317 30012 20256 25577 28695 25750 25399 18463 18948 25706 24233 29836 37846
4658 1830 2191 4613 12388 1145 1330 1240 1244 1067
4659 35393 32990 31243 3687 37368 10481 6274 30757 36577 3550 14358 24905 14335 15055 3811 28932 17636 14846 3661 3627 10487 14395 5685 15410 19907 27979 6905 19649 34609 19573 35337 30243 18617 13592 33687 5508 32440 6821 6784 28012 34556 28430 28015 8754 24463 24603 30751 3583 37120 23500 37018 32167 23231 19908 37316 25904 17643 6925 33895 4903 5353 5845 37211 35024 13563 8757 22196 5397 36707 5841 7643 20437 6796 1626 35541 5327 30676 24874
4660 3070 23507 19962 7978 796 5865 6899 16 4963 20133 6904
4661 776 3245 2014 2782
4662 2927 1537 19619 25167 3638 17163
4663 23282 2548 15177 7631 11501 9822 18131
4664 12744 11296 14034 12724 1296 3096 1786 10723 12947 30792
4665 22499 23109 17771 18178 16121 32493 25500 28740 17735 18956 26145 16028 36629 19093 26459 32223 16145 20766 16296 18492 17275 27523 20974 18738 27541 30528 20679 34176 35573 32780 36408 32307 26637 33266 24523 23673 10299 33181 3859 18510 28119 30581 18951 27061 27093 27757 23254 32863 35494 34953 27491 21675 22494 28829 31362 32938 27854 27502 30858 35574 23383 16059 20973 29257 33737 18187 22463 30859 10736 31630 35316 23643 31352 35317
4666 9883 10900 12998 14636 12581 1259 15578 13 1136 1256 2028 4191 2343 8347 11955 2531 32511 4368 14417 15499 6518 2583 2541 28177 23139 6531 8850 21867 20302 2537 13307 19871 7901
4667 33739 27029 37059 28455
4668 18730 16098 21670 23348 32628 29179 7331 10987 16106 19501 30012 24517
4669 33959 36945 31816 32578 9296 28922 9876 25540 35076 33594 31867 35349 13354 34487 28565 32845 34634 33298 6355 22190 3302 13362 36318 25541 37674 34890 37509 37178 36314 7835
4670 14574 1038 13837 22876
4671 8842 30040 14775 32025 33583 27846 14460 2496 7925
4672 15414 30069 32431 26375 20594 30065 24590 36665 3426
4673 22509 27530 18994 20348 18925 32393 28840 20349
4674 35744 6455 35087 6564 22088 35022
4675 12828 25897 15112 31506 19709
4676 6960 4101 11806 6788 5389 6748 12017 24449 8296 11752 29279
4677 18121 33849 23081 25722 5249
4678 1556 1243 11712 799 1045
4679 659 11986 2155 19538 36631
4680 2012 5340 2787 3647 14866 8433
4681 14807 20507 31841 8196 1096 18431 25670 18856 26440 17249 8773 1590 1325 35387 918
4682 12028 13926 2596 12029 24300 13176
4683 25833 32572 17358 19080
4684 3634 25588 19007 3626 5728 5342 2706 33074 9153 14949 11301 17605 23752 3754
4685 1253 11505 7263 12878 4443 2428 26158 33993 19209 15486 33421
4686 15315 2482 8832 15667 18117
4687 2964 3627 14925 7428 5024 3253 810
4688 5235 26814 15046 21432 380 24414 3284 4505 13514 13035
4689 18654 4027 1134 31115 33617
4690 1541 762 2012 649 13 1031 1607 4634 4189 300 3013 2851 7762 11288
4691 5001 6726 5148 695 4312 7260
4692 9340 36386 4191 3737 915
4693 1445 1717 8392 5465 1245
4694 26988 8402 8313 5173 10107 2809 8636 8404 6889 14853 14685 9263 13679 3259 5003 15893 6816 9149 8411 11043 3651 6653 18019
4695 721 0 11295 17919 2014 2953 1718 10208 22650 2767 12859 10862 681 2936
4696 6094 7827 25112 1384 20715 33699 33509 22672 11537 24133 11512 25404
4697 10547 960 973 15869 1296
4698 10252 1156 6434 10871 11541
4699 24359 2554 17250 6531 30052 1524
4700 8152 2341 13878 24920 2366
4701 8795 2523 7299 3371 8176 11507 5453 7570 10845
4702 15405 36838 5271 6809 23493 10232 29650 31712
4703 2866 12907 20726 6269 29351
4704 3259 8752 7108 1035
4705 2964 14371 24460 835 608 36510 5310 5164 20235 31841 2199 7064
4706 22502 16030 16661 16188 27398 27910 17255 29381 20941 16090 16858 20693 21412 16539 10732 22838 21411 21414 27528 16113 23175 26482 21672 17865 19114 18956 28666 27914 20679 13087 19528 18912 21293 18709 10698 19878 20349 24231 22537 10736 16846 25998 27597 30390 8083 30450 32220 32303 35573 25504 35513 15859
4707 17919 12679 13035 24449 2927 4991 2748 3480 21406 33560 37212 2754 7429 1003 32514 24579 8436 4981 38009 35986 8657
4708 13324 9040 11211 19818 20988 21051 21067 3207
4709 6133 980 6950 4711 3430 3133 2775
4710 11182 7839 13635 13357 20606
4711 15546 313 30493 22378 22821 19184 21563 29665 23220 17048 164 29576
4712 8080 16360 8502 4505 11894 11595 685 6655 88 22129 13930
4713 34303 3309 6803 21861 37924
4714 12986 1718 8434 3489 8147 13094 6215
4715 10838 13595 25912 3613 5020
4716 11505 3294 3259 1884 31995 7254 5821 24362 26095
4717 9574 4796 5371 5380 709
4718 27211 27861 29785 17816
4719 14096 14132 1346 22057 11928 14124
4720 16018 16739 11450 17978 27272 17900 3166 18931 3842 19190 16671 874 7386 7375 21668 16204
4721 16033 3900 16236 4783 15821
4722 17857 28600 7312 8307 8336
4723 16249 5379 25489 9264 33008
4724 9614 20444 12151 22035 2352 12057 36369 14793
4725 15536 14898 21455 3027 9602 9515 12665 21454
4726 552 313 4557 21911 26627 14296
4727 8909 5826 1638 12003 11687 1817 7519 35245 1084 11975 2701 1257 2139 9780
4728 3556 22948 5233 23849 5244 28961 3801 14 14867 25897 7484
4729 2953 79 5685 17733 1718
4730 28700 25366 8260 13750 2593
4731 27720 24231 31635 37390 27728 23019 26076 20776
4732 19867 12069 12618 33489 13574 9218 13265 13496 19564 25654 3482 79 7573 3508 15156 25479 18111 11225 6888 34518
4733 24984 11199 12231 8106 33100 5880 9033 13623 37860 28550
4734 18829 18373 13708 5351 4280 14959
4735 2115 24283 33532 6497 20554 34307 13759 28871 6263 12139 2320 1687 2531 1136 11976 6431 35244 12761 12346 24377 30477 16419 25329 33349 11601 19742 34454 28035 34958 2430 35527 9537 1576 12925 4876 22601 5595 14823 1887 29433 26932 37187 22038 6169 7290 30360 1701 26177 5485 22426
4736 6942 6215 1058 2389 35793 37077
4737 7944 1143 6433 13892 1515 13930 2392 3135 7504 7765 5031 1114 16374 2030 7353 13464 13141 2196 22668 11359
4738 31180 35794 4027 2272
4739 3978 11124 32924 20970 20111
4740 2012 6732 773 2942 2724 2785 790
4741 1256 8842 11956 26936 17478 19218 29683 29591 22427 18158 13906 28955 1595 29411 4474 35193 1478 7062 2050 33583 32269 1496 8845
4742 8926 10854 6620 11491 5076 12304 6564 14636 5375 19162 14842 28352 2196 15132 6436 24279 31003 33434
4743 3074 11056 11226 25519 14951 4667
4744 7025 2523 5485 5484 7128 2686 15321 1221 2579 4555
4745 4795 18997 33522 15973 19487
4746 9682 11515 6465 10900 20141 10686 24110
4747 11181 8104 32851 9878 24440 27790 36901 5884
4748 34102 13930 23720 8867 9328 22528
4749 353 21943 2996 22012 21728 26 22091 15545 5966 5969 24928 21889 9518 15367 19921 22562 17040 5999 15353 4753 174 9526 19106 4808 17025 24008 430 6003 548 9693 21722 477 17562 14904 12447 26302 214 21720 15546 31534 17042 21 30992 2978 12428 20714 17045 23220 4840 5929 28752 17838 8504 1782 4685 626 14048 15615 11801 601 31882 12568 21067 20999 8004 882 24731 7732 15614 3918 880 11268 3121 19357 1351 4730 569 12955 12191 4678 36950 19352 9618 13978 8464 29085 14076 18680 28970 14127 14126 12259
4750 24910 27720 22609 21673 30713 22396 3937 17811 27627 29770 21285 29582 18944 18956 27174 24785 26483
4751 22670 4297 3050 1995 4034 1111
4752 222 11315 18066 3305 6198 4938 5852
4753 20360 4459 2620 11747 24846 36209 8373 15899 5257 33987
4754 11532 15686 1713 7627 8772 12328
4755 16012 24807 21294 21122 26142 18860 16805 16631 23111 15991 9528 25971 18550 18012 15846 28482 20889 32076 18997 24930
4756 4013 33181 27493 27637 27708 21117 27640 27453 16635 27504
4757 21455 17212 12651 24422 14897 16230 17085
4758 9090 2880 4731 4080 5040 2763 1626 2759 11396 4705 3545 4293 7722 8278 10414 8653 3649
4759 5094 1155 9775 1877 8203
4760 21999 5915 3027 28621 32570 481 23575 31983 150 26351 15041 21797 34193 36434 35722 24050 24049
4761 2553 1039 7488 33583 36528 23595
4762 20585 3076 6797 31220 2179 24990 30520
4763 8990 11871 11593 13823 22581 3821 24355 6613
4764 660 2334 13812 3451 9559 774
4765 24933 26469 27762 31320 20771 27914 30389 24075 11108 16824 21670 18883 32216 29288 25201 21675 35833 34249 25065 33991 27477 26952 18291 19755 35375 25682 33648 34397 30390 21278 22540 28286 20971 3143 36527 16697 26970
4766 5685 4963 2179 2904 15808 2775 3778 10563 5829 2737 6038 6152 3506
4767 10133 1038 7036 1253 23456 1656 3737 10665 6430 1397 6492 13288 12717 803 1523
4768 10941 4321 4843 4677 596
4769 31856 30612 25590 796 10921 9624 13446 6920 8171 2017 34008 9567 10834 21354 21836 7642 19006 12859 15442 10812 10829 5398 5378 21859 92 12885 11652 4969 28898 30494 24455 9279 9177 4502 34271 10462 26293 3629 8696 12119 34130 9569 13788 13028 8586 19690 4991 21527 3811 8649 2637 15459 15450 711 26308 21140 32584 3129 3307 11894 31463 33066 23352 29955 23917 21624 12900 5670 35869 31151 7335 19374 15457 19063 9278 30344 34609 37248 15705 15480 30454 13240 37847 8757 37212 30632 7424 25547 14402 19701 4510
4770 9761 1992 7149 22487 13935
4771 14823 3357 1595 33524 14755 14469 10133 1880 35342
4772 8663 8624 3488 7591 8392 15461
4773 3088 4687 566 12191
4774 8368 1472 8959 11661 24373 35308 15938
4775 6652 2014 2902 87 3290 868
4776 6942 35019 15321 19127 9745 18431
4777 7833 2022 4497 15755 6624 760 657 8172 10509 5188 11895 1538 8757 23533 2019 6159 92 2799 769 22771 772 9989 7545 24457
4778 15194 1571 10595 8779 6966 4473 2382 12380 20307
4779 1600 2032 5769 1995 7283 7151 4477 1506 5094 12763 11333 1892
4780 3242 7597 811 1709
4781 2958 32691 1709 11921 30233 9174 10792 18088 5012 4087 7707 15807 3686 5345 3763
4782 1558 8735 710 35186 2812 24849 2897 1509 2494 657 981 2782 688
4783 7140 5717 2835 3626 6651 4921 8690 19596
4784 9342 4487 9345 20476 13375 5104 7209
4785 82 697 2799 2942
4786 2509 23142 26927 17287 26999 923 23567 34430 5545 1122 9063 20708 9340 12480
4787 690 2845 3628 21464 708 3048
4788 18475 22843 16998 15864 31156 23365 23362
4789 1244 10247 1104 1855 24377 17926 1659
4790 28303 18949 21277 16637 21418 23677 20838 20939 29605 19526 31724 29833 34940 36520 18482 26466 24073 27434 26148
4791 2833 5233 5652 4498 716 8418 10377 25459 17145 2012 30243 20399
4792 1045 6397 22598 7699 1487 4452 26420 4205 10591 11478 14461 1245 905 7 1569 26067 919 1239 1168 23284 30280 14313 8224 11092 6428 5518 17382 6241 1661 15114 9395
4793 2822 17279 23287 22412 15141
4794 36867 15684 21412 8804 8769 8852 18430 25927
4795 2092 11596 7752 8468 37348
4796 13698 20214 27434 16824 36072 16204 25988
4797 4557 8703 3352 20353 12938 13034 762
4798 670 1547 771 16 36762
4799 16629 10231 33995 22126 24456 31189
4800 4772 29954 786 2769 20400
4801 7015 15636 1558 33423 2496 28081 13134 18778 2242 30061
4802 11924 3259 19246 12218 24308 33953 13352 12219 23037 19820 26898 15779
4803 9838 33894 24378 11661 37881 36993
4804 19502 7328 28326 19190 25078 20675 36408
4805 14454 3765 17685 13542 7438 37046 31881 7815 37848 37499 3309
4806 8806 10660 7061 3294 2523 10657 1240 4035 4658
4807 19104 26360 21453 28866 22379 4599 5992 28617 26027 157 262 15354 22819 26355 3017 190 26351 26559 5989 34336 20878 32997 475 14902 28271 21876 120 354 15045 15042 31679 5977 17578 31676 17991 31677 11442 23576 22800 6012 32129 31674 28625 21999 28642 28472 21982 33043 31678 26354 31983 31564 510 24053 21959 28467 35957 149 1496 1515 4160 1031 6972 3047 4824 5256 36482 5110 13 21995 17990 28478 15032 3034 32892 13109 28612 311 17079 21964 17081 36813 22822 28634 37568 21563 31681 37869 26364 32094 32334 24051 17077 30115 12453 21928 5984 468 37042 22824 95 12659 17078 28470 26356 28641 5940 2658 34091 31683 22899
4808 29648 37260 7262 2709 37370 15470 15475 37051 34929 15474 5175 34934 34928 31749 9891
4809 16632 27926 27148 29236 31561 3937 34870 27759 3904 30175 37850 28322
4810 16421 11242 1203 9663 25265 2315 33596 29042 10133 21644 13812 13174 12356 28107 2025 1696 5776 12304 4555 32107 8486 2384 760 15486 31199 4539 14730 12871 4160 7572 34138 31537 14786 29383 8956 10991 300 36961
4811 12472 150 28773 410 15333
4812 23560 31666 1257 3379 12143
4813 7996 29096 15340 4257 7151 4477 7342 11960 6165 5472 2479 13891 2011 34062 23605 2140 2466 13060 4893 2683 31261 892 3455 4172 13839 12703 9739 12365 4572 5105 23565 12029 4473
4814 20349 33599 20946 28583 3171 4778 25065 29317 28806 19786 16018 23348 21136 16727
4815 12017 2902 2724 3083 3787 5023 11636 8757 23522 2801
4816 18170 33680 24454 31463 9285 5670 34700 4590 22765 5724 9286 9553 27890
4817 24417 21445 17018 22471 21433 9601 24423 21451 9925 238 26411 347 21454 24425 37999
4818 26275 17866 15992 30039
4819 762 37212 16358 2787 18124 12679
4820 8629 26814 16 33559 33503
4821 15749 11628 15677 25186 4168
4822 23300 2902 5009 7710 11225 22984
4823 7643 37070 31018 4305 10460 16619 2869
4824 2800 3584 11286 5002 5051 2893 11119 2936 4500 6719 3490 14416 7762
4825 14832 21353 4085 35202 37715 31751 3778 7719 4943 33265 28905 31450 9261 22776 15054 737 739 2904 24455 31830 38043 15697 3423
4826 26458 25765 20942 17897 13698 16236 30580 21421 35994 34397
4827 12933 9829 20225 35243 10315 6 7634
4828 21872 1382 20317 22604 15247 2541 11353
4829 26793 2432 6613 23764 30402 27017 22029 7628 11672 11667 6974 3714 7912 8816 2618 11541 6407 3839 5909 31171 14303 4283 34522 11961
4830 1104 6512 15684 4183 5362
4831 27733 22327 32872 25079 20349 27549 36759 37141 3938 16203 29260 30390 17807 17778 28396 5249 33352 3166 37500 37196 18330 26456 35874 37815 37083 36231 33783 16241 17783 37855 31352 17798
4832 526 26780 24048 37885
4833 2063 12875 19224 14635 8376 25194
4834 23359 19499 24181 18015 16713
4835 24437 15226 8436 7830
4836 25081 19788 25850 24183 16081 19088 3925 25961 23664 35228 19876 23332 7382
4837 662 980 11691 15028 20707 37123 0 8670 783 657 12859 26814
4838 14463 29088 2352 10978 10856 6503
4839 2632 3839 1642 34460 8928 7159 2613
4840 3281 5685 9286 8436 3817 8693 715 2017 649 24579 30210 2737
4841 9362 31563 12882 4026 10857 20027 5364 32030 4633 23125 37790
4842 7925 19278 6439 7291 6516 30376 25366 25813
4843 20405 10133 15321 2969 9007
4844 22395 31397 16196 27231 28385
4845 4677 565 12181 19053
4846 8322 9893 10467 33713 29123 10431
4847 32283 15616 19766 26824 32500 18949
4848 10125 1072 6 10091 4661 17519 11916
4849 13077 14721 15321 10133 8367 14294 1038 1831 7037 7501 7822 1256 1378 2252 1253 4667 11501 8849 6465 5377 2414 8434 3259 9805 2904 11511 24329 7425 868 82 11515 15265 7780 11498 22431 12930 1526 21261 15340 1031
4850 9626 3269 5826 6387 24220 2264
4851 34067 1352 34312 2674 14006 14025
4852 1472 8952 14668 12151 7489 8827 2440 22418 1696 2413 7627 20311 909 25665 13313 25224 20235 19209 7111 3831 6442 10125 2449 2541 2515 3383 11660 9834 21867 9467 24359 1949 13754 6531 6439 1034 15277 2564 15275 26928 14736 24345 2598 2293 17113 1253 7115 14456 1527 2537 14787 33316 25677 3839 7631 9911 11093 15669 11631 11094 8759 24357 13310 2250 26106 26172 14589 22036 35802 30372 4654 25138 7635 25330 1164 28725 24675 2507 26175 25356 7638 30370 34406 25328 6433 2566 30377 33992 7629 2321 11980 2604 9525 799 1103 6500 33707 33583 31691 25461 37753 15651 34876 5480 26846 8864 31108 32512 19127 37845 10621
4853 23943 2560 6387 2224 15247 10320 9664 10978
4854 8493 8500 14076 8492 14126 1786 23933
4855 29014 15062 22728 35605 16146
4856 300 2013 2014 14528 36873 29325
4857 11955 13851 2618 1996 17289 26917 11525 4217 6455 4654 7300 2044 9002 14891 5624 6542 6506 7793 27018 8831 32194 8832 15646 35022 1898 12882 33772 19227 2628 9344 33150 33415 2596 2554 1091 1071 33708 34735 15577 30358 31270 11835 1968 2933 24269 6494 6393 31522 5585 6559 37663 9418 821 4258 26902 7429 23139 92 6053 8750 9495 87 88 7881 1084 19197 31214 17291
4858 21683 24122 19880 20942 24542 18039 28242 23370 25065 17764 30853 26728 25399 27126
4859 8566 3838 12287 9412 6302 6378 751 11182 8569 6317
4860 12878 11505 4 6391 650 1818 6841 18434
4861 4080 25607 3786 3771 6385 2963 6123 30623 2847 20336 12935 6197 6036 3317 25000 2019 14568 3526 25893 30606 2814 2706
4862 12017 31027 28071 14379 6894 6861 9132 809 13668 3605 20584 3918 3306 13038 10500 10692 13280 662
4863 33751 20536 12882 4373 1156 6501 26272
4864 8397 3627 12826 14127 5398 22449 30746
4865 7491 17393 20227 18133 32020 6432 19162
4866 7487 5200 5102 1690 22605 2360
4867 22111 3313 4937 5001 18162 4955 11896 28999 14643 30166
4868 11260 11801 32378 27034 36538 31769 22942
4869 8293 10379 5063 5021 6708 2170 6131 2015 21215 3770 6061 9247 25747 8278 8645 12609 21829 10408 11636 7440 12635 14415 5327 4078 25860 14388 14678 28098 4509 24460 20587 10452 24563 18197 30744
4870 15092 6036 2734 3651 6820 2874 786 2831 5690 2853
4871 15469 20128 3690 16621 29000 12330 11636 36417
4872 3628 5845 29423 1053 799 23559 790 14827
4873 2376 1478 4173 928 1089 781 5826 13 2191 4606 1145 6090 12529 1487 8748
4874 37179 10465 9218 6798 7453 5707 9233 9127 10483
4875 223 15725 31249 21949 24403
4876 27591 27532 17823 36627 25673 27687 20111 36081 16104 3965
4877 4993 10440 10332 8406 11066 8343 9144 2835 8681 6798 3072 29948 14931 9583 14345 2832 34333 19719 8412 10446 10812 19710 2966 21263 4242 13028 23995 13094 4270
4878 9764 12593 2608 6403 1243
4879 3137 5757 1136 3301 13866 6531
4880 10824 9246 6015 10966 3647 6824 4999 3645 28686 14541 14376 28759 14659 35125 9565 10463 34864
4881 721 2964 3248 2806 2902 1541
4882 3811 4101 19633 12889 8326 17126 695 13386 7932 17693 2842 18314 3778 12621 13574 19646 3513 710 6059 12773 10395 23482 13593 12159 33254 28357 3322 1090 2876 761 29125 4963 31811 6894
4883 811 12901 24062 4798 6730 13241 21745 10370 1541 5381 32904 17919 69 1017 15218 3756 8757 4497 2820 13002 13028 9981 14934 2022 851 6269 2635 11051 704 5156 688 7053 1540 3817 13239 6839 1708 814 7147 3253 2964 4236 7892 5242 21527 34937 33033 2737 12015 37800 1542 6742 6031 32608 8578 6952 5724 19683 4237 34444 25798 24634 6717 89 22164 38047 37967
4884 29364 24879 10466 8686 10488
4885 24269 2187 1837 23474 2481 35701 2364 31262
4886 2542 1979 1256 2058 32485 31522
4887 22863 6636 1837 37794
4888 7101 11585 3725 5227 6616
4889 2963 12843 15112 19620 3932 14870 18169
4890 20573 34917 29051 5020 21149
4891 5319 11650 714 662 2718 10395
4892 16122 36461 16675 35400 29456 23176 23310 16735 24930 21531 32305
4893 1006 769 1025 2748 6671 2788 2819
4894 22779 33899 31750 690 27795
4895 2867 2706 1025 3490
4896 743 19933 14568 3563 9584 2903 10335 3068 1256 15695 25893 13515 19061 5172 5018 7070 12707 8595 11956
4897 1913 7295 8869 7399 24130
4898 32775 26458 31634 27246 18712 14527 10223 16707 16351 7369 26976 19284 17782 17786 16297 23071 16030 18737 21421 29957 16794 26947 35148 28383 24549 16305 7326 32987 16076 4794 12784 24204 26961
4899 799 1855 5752 13780 1663
4900 7494 33927 8827 12932 13406
4901 13062 34122 11550 20284
4902 29385 15674 12883 2519 9014 22883 11329
4903 2360 1405 23182 34317 6266 29609 2569 7299
4904 1134 1373 1427 6465 661 16372 11498 1037 11510 1526 6087 905 929 13483 10139 4186 9025 7827 4158 4072 924 6436 11018
4905 5626 29883 13209 6489 3830 29265 10350 6217 11487
4906 6 1199 2671 10623 10324
4907 17348 25836 19468 19459 19375 17347 37652
4908 821 674 709 35381 2440 34433 15274 24370
4909 2739 5018 2014 21461 1540 32514 7545 762 715 18674 4981
4910 7886 24367 13480 35388 28596 15331 10950 10666 36845 6227 11511 9834 31171 30280 15259 32084 20451 4402 16585 25330 1059 2604 30591 22427 33056 1944 31277 10256 1078 9018 29612 7167 10780 22429 10250 7074 8810 5478 6998 7060 11886 2550 8921 11677 1798 25280 1080 7986 1569 7070 4397 6563 17254 1129 2433 11678 1177 2705 25327 1130 25356 1051 4469 34114 1103 35131 37915
4911 34130 22412 12673 3629 28848 19932 29955 15060
4912 1905 29161 13930 23139 1208 1176 7111 1330 6471 2432 24664 15748 7076 32174 1956 6687 1087 25349 11863 1129
4913 11879 23607 2585 2486 8908 2224 31927 1030 6551 1134 1264 2272 1245 5377 1482 11983 6403 7570 2244 2316 3218 6226 19209 1607 14591 36839 2448 10636 2969 10 1244 1406 32265 11877 1457 9414 25271 12717 32089 36441 3346 17341 35013 28903 11990 19204
4914 32395 19764 28308 37013 18435
4915 26177 5453 6497 2050 2590 7478 19209 2009 36915 6431
4916 5966 311 9520 15037 19977 4812 3025 17563 8027 29128 29139
4917 29644 7444 12635 3309 3788 9574 18169 10435 14428 14360 768 14397 796 14414 845 19709 2012 29649 9250 9501 6655 15457 33489 5381 12978 32431 19960 29053
4918 1468 15640 5110 923 10634 7 4447
4919 9861 2447 20192 2189 35790 8746
4920 909 10591 6448 10946 6495 6496 1330 33584
4921 32055 27848 28672 3996 3999
4922 7583 9285 4802 37947 31463 5386
4923 6469 2918 26448 20510 31270 17419 24754 11491 26169 33706 34109 32028 30279 20363 15502 31563 31731 31928 2075 15136
4924 2017 813 5188 1156
4925 16065 15990 6325 20124 25062 7380 26531 16745 23820 23310 20179 25851 2693 3999 30430 23267 16845 10982 16778 20349 7377 21289 25855 28804 27541 25289 32783
4926 8696 12116 11071 5851 18094 9583 5319 3325 34470 3077 11226 7981 6038 76 5673 5181 8341 29982 4502 30757 13537 13556 10481 9564 34468 18175 7162 11025 9569 6053 28430 15407 10607 10239 13559 12898 10431 12774 22244 4287 3304 2803 24563 12830 37368
4927 768 1446 5666 852 1718 29210 6159 13034 3600 3310 36641 22287 3574 1017 5270
4928 8517 6303 9033 6346 30848
4929 22261 12309 2067 6226 4158 4548
4930 20021 7785 2067 8540
4931 12795 25402 5448 23785 8889 3119
4932 1255 2445 2215 4197
4933 1481 16592 13741 1146 11502
4934 9893 13023 21623 29268 11403 5395 10212 25944 9988 30065 2775 15464 34574 4974 7643 16611
4935 32325 2533 33414 2054 2513
4936 87 5020 3430 6159 3422 2638 12826 787 37007 9501 25255 2712 774 8669
4937 19776 27636 19790 35595
4938 1558 8078 1518 1053 6490 2482 7341
4939 6403 659 6433 6487 2705 10899 7506 15678
4940 8303 4080 21816 14477 4962 8932 20707 28930 7441 16627 26826 10508 28939
4941 18584 10626 2225 4443
4942 13379 2632 9342 14968 33433 12346 1322 13403 24389 3379 17342 6433 7629 19127 38011
4943 18750 23343 15608 18198 18495
4944 34814 32055 35163 23307 25122 15972 33825 27193 16022 17817 32862 24231 35036 36025
4945 8287 15 443 12181 8649
4946 425 150 8024 5559 144 437 14898 12457 45 21731 165 28467 4741 21906 21563 5996 153 19917 15729 9922 28254 439 232 20485 12664 37880
4947 37072 9139 11425 14368 14946 7312 24460 14942
4948 22913 2362 14063 10985 1338 14487 11933
4949 11733 16 12167 14949 5188 2794 8406 7147 8328 7653 2808 16247 6675 10409 3322 13045 2964 805 30166 19653 31939 8649 13507 13443
4950 10292 6064 3090 566 10291
4951 8763 3379 4426 11672 10125 6416
4952 16623 33391 15417 17698 14539 1532 9544 786 20621 13041 14374
4953 9186 10450 6753 3613 9051 13241 9168 31218 8668 12905 13602 6768 14676 6771 7956 10927 17860 6761 19641 7335 5399 6654 9256 6937 6904 25408 20860 12638 10468 29055 9157 14656 7611 34594 35170 24603
4954 27555 30987 21421 28574 28585 30262 36100 20974 33184 24169 19464 24573 28227 6320 19507 33735 33885 35874 27715 18725 36026 28654 27341 23667 30252
4955 21273 35072 25299 5033 4557 28531 32951 1010 32294 25962 3850 32299 35482 18119 28657 20772 34812 17885 19261 27923 32115 27391 30988 3981 27705 36325 27260 17823 25575 35237 18605 33783 30271 27710 4014 32703 28529 33873 3956 24837 30129 16941 36201 27133 36889 36194 30652 36065 35030 37196 29930 30578 37876 36935 25087
4956 1522 6249 20039 33144 6467 16752 19873 12882 14997
4957 601 15778 8109 8106 8517 745 9873 5030
4958 21409 34189 35883 37857 30209 32541 35884 24644 37473 31756 26016 12906 14453 11895 37945 20581
4959 23471 23013 27611 18470 28449 17173 23957 26335 12788 3352 18037 19533 18566 37567 29821 33790
4960 32098 22827 13105 26780 29624
4961 15068 11730 2182 6385 14587 5063 6848 14676 24985 5698 29822
4962 5838 34200 11580 4553 28903 11664 9016 18776 18778 11599 24663 4874 30812 2056 8772 31464 6212 6084 12715 11908 2025 28726 22995 11483 24337 1659 1604 2380 3705 36209 7802 1506 24324 7187 37139 11082 3231 35479 4567 26655 30918 6531 12328
4963 14346 10449 3647 9574 22678 13034 13032
4964 2803 2902 2942 9989 8 762
4965 2964 2936 2014 2902
4966 9459 30877 9388 2525 25264
4967 11214 19071 3213 31949 18028 14605 15833 27788 13345 13349 8109 19243 20504 28921 36673 10157 31537 9873 28199 30845 35077 36473
4968 6145 16317 3155 3179 13337
4969 87 9140 92 11306
4970 22840 16499 16878 23117 26076 25204 16825 34481 29183 16407 26485 26484 15862 35870 15966 28301 36548 24185 31077 30863 10736 28535 18373
4971 27498 10481 10431 18782 2734 34556
4972 12893 3633 8435 11813 6758 11229 9574 9193 21194 8388 29644 14416
4973 24192 28724 23838 2564 1949 33821 25329 37518
4974 31659 7756 14139 26854 33270
4975 7995 25133 30782 9830 10871 9818
4976 11512 14974 1656 7500 8828 1435 13744 703 9794 1826 13762 13403 1073 1523 13308 10969 7888 30591 5536 31578
4977 898 29143 6237 6 17828
4978 22233 14387 22762 24561 7918
4979 30431 34654 24216 30836 22716 24140 36688 23103 16521 29873 37626
4980 6837 762 17643 13040
4981 29055 15425 12630 29219 23246 36419 19273 21348 5068 30703 15448 32632 4557 8144 36540 26014 786 26071 15460 2963 36490 14335 5037 11439
4982 25918 65 9826 1497 13734 458 23575 15354 481 12467 29331 13099 4808 5367 494 10758 150 114 353 4814 231 17036 17988 20876 17048 33881 32130 63 12449 22380 3023 341 5936 281 29132 479 15533 438 21764 30204 21780 5946 21781 21756 17985 28614 251 23854 5974 20409 3027 512 24021 542
4983 1250 29885 30986 2481 1247 13849 4663 6506
4984 19009 18967 3806 34749 30160 12160 4943 7442 20418 9565 4274 8932 5496 15052 33088
4985 1259 35725 24848 15640 8828 6400 19136 15654
4986 22136 29210 14566 30397 22153 14183 1121 1053 17235 2813 13837 11651 2320 8704 34726 32454 2019 11225 1981 8399 29649 1833 13793 21207 22118 20313 32561 4166 32743 4713 27407 16357 22441 23594 11856 2557 21904 28533 4541 12130 24731 34959 11251 19863
4987 11397 27835 20415 6028 31960
4988 24390 7699 22599 6531 30571
4989 8436 3059 2800 13769 4981
4990 18877 16773 2632 76 8281 32126
4991 15664 1893 7501 15681 904 24376 35745 36209 7206 1513 6461 12882 35744 33154 13866
4992 8417 3502 9562 3698 15493 8391 3603 7162
4993 26099 22388 9431 11995 30104
4994 6750 8298 9171 9562 5503 14920 17616 29352 36262 26312 35024 34393 5841 8403 31750 9139 23920 14328 16251 5050 6826 29715 2865
4995 2907 7426 21623 11894 1826 13626
4996 3690 7247 8172 3804 14167 811 4976 4929 3529 668 4802
4997 12568 12812 6351 2675 4708 2703
4998 3957 29322 23680 20937 18187 16601 18464 16197 20946 19193 7374 26476 28300
4999 8281 69 4509 774 2806 36621 649
5000 7627 1457 1979 9800 6618 17291 36658 11663 12346
5001 8184 8228 4137 4267 4034 9768 1438
5002 25845 21300 27189 25962 17900 19265
5003 4094 7639 10802 9987 27841 5173 8410 10219 7279
5004 1513 7944 5591 1261 1134
5005 23999 12111 29498 562 10906 1270 6646 23990 2781 29513 9962 21999 22087 10911 991 35680 12182 6641 12099 5295 37054
5006 15644 13745 28795 2342 19799 24755 26224 23188 8828 15270 24344 6497 19863 15273 5209 12147 15685 19127 25418 11616
5007 34180 35447 35835 36714
5008 24448 92 3495 3605 11256 12000 3051
5009 1181 8215 919 5467 7389 4197 1904 6388 26650 2100 9836 2061 1471 13412 17656 11327 21170 13904 5117 9797 15266
5010 601 555 580 1675 586
5011 711 2888 769 3918 10488 5020 34257
5012 1696 2082 5452 3451 9314
5013 8668 35205 21410 26811 33590 30327 6153 11895 4294 37364 35202 19852 33027 13791 7436 33401 7718 7595 6800 21848 16976 28905 22124 13256 6941 30337 12849 10925 36096 2894 9559 17638 16565
5014 8434 21837 26291 28182
5015 9559 13793 3570 4802 11229 2709 8667 3245 11286 22776 3490 31708 9574
5016 2015 11397 11732 8313 5357 8630 7453 17722 34449 8278 24713 27882 37373
5017 14727 20480 1805 1114 1702 2099 1931 2436 18792
5018 3305 3074 5054 9266 5683 810 11056 31494 14439 35430 7873 10569 35916 3284
5019 743 784 5717 11430 8633 3591
5020 20 19922 12474 15042 19911 21797
5021 17219 3483 1941 15528 5550 29553 4826
5022 2803 3281 5885 9998 23715
5023 7147 10063 3803 5210
5024 1805 6216 1441 1252 4404 6538 12998 11965 1802 4483 1070 29963 1124 12699 12114 14691
5025 7341 25663 23548 6621 6391 1956 2541 19363 2527 37097 37261 30843
5026 11675 9872 5216 6566
5027 33357 4557 22538 19003 3189 3918 27389 769 3932 2897 35842 22129 2022
5028 11983 3385 30525 33231 930 4137
5029 1043 22429 11879 2563 24188 5534 14775 4667 5482 26093 2523
5030 34563 17245 13482 13477 12707 15277 8827
5031 17329 36222 13702 30301 28669 33419 20387 10298 34995 17253 18818 7929 36654 20384 21541 36269 37378 35677 33361 37057 34782 31292 32284 23963 28027 21372 27657 3352 9609 20232 20291 20946 16321 27562 21137 8767 28808 27673 21566 31687 37335 21376 5033 11450 17888 27486 27926 23010
5032 18379 6150 24580 28317 17326 14475
5033 24697 12752 9460 1880 26168 2564
5034 12166 22270 13052 30220 30701
5035 25648 7904 2014 21872 1499 1494 7064 1384
5036 28707 31514 29679 16148 14307 26631 30301 23403 33122 37216 21335 12788 37226 34167 37231 34798 34851 26003
5037 11340 3838 754 23036 33127 12231
5038 20244 8111 17314 20826
5039 29752 10987 25676 32216 25398 28696 28454 20094 32965
5040 25577 11468 23384 15952 26953 3143 21675 3906 16555 20942 25065 17786 19506 20675 16207 27518 16241 14272 36161 11124 16991 30390
5041 37833 37411 25168 25156 26331 33280 32301
5042 31895 2020 29496 20637
5043 6215 7005 8538 29721
5044 3370 11876 32337 8486 34198
5045 15133 34112 18856 23283 28903 12010 7630 22386 19806 6259 14469
5046 6433 6111 4615 8816
5047 4283 17238 22601 25346 11521 15826
5048 30767 25749 13521 23969 22497 16808 21126 23266 33864 34642 25717 31086 15618 24952 36963 33345 28739 18479 34953 15996 3930 16269 3998 16869 22704 36266 33854 28833 27913 29837 24926 34399 21414 29605 32506 22463
5049 15103 15642 13492 9860 10250 8365 8839 7058
5050 12040 7560 1806 12039 15185 1816 2279 6632
5051 13055 10765 4205 4172 12995 31596 20706 7404 9625 5759 22668 2115 10336
5052 6717 1532 868 3277 2725 2179
5053 28893 32436 19430 14582 29149 772 7811 811 3525 22781 15419 15058 2788 14428 2772 12675 12906 22782 5383 26310
5054 2632 20271 3606 3245 2706 3628 4590 5341 668 739 1853 3254 1937 4294 826
5055 8987 19742 34576 2566 16743 4395 19831 13906 24360 24246 2060 36597 9756 25667 11511 25968 7635 2616 13315 9651
5056 33759 1842 10658 25978 1898 4257 1828 22866 1491 12344 35244 19202 33375 9501 36209 12932 13312 28133 22204 36453 10254 12880 21593 2822 12818 9677 1580 4482 7074 1200 1490 28414 1893 32164 7827 29037 16580 4169 9062 21559 35182 29963 37097 37991 37974 11747
5057 8088 24500 24908 33828 16740 10282 13527 16848 18754
5058 9590 22037 22094 420 21563
5059 7729 1768 5432 1343 19295 10516 7757 646 973 15855 3121 11774 2703
5060 22514 5685 30161 18781 8318 13281 7815 30382 8667 10563 13028 14919 69 33558 2179 18783 26653 13588 21348 22156 19653 24296 2015 15163 18964 2709 33776 34392 24587 14410 25491 33057 33804 2797 34609 7446 22289 34189 10465 8412 4087 10927 3603 10920 6131 37167 12608 28914 4956
5061 3635 37134 36882 13020 14582 3073 3769 6277 10053 7312 7307 9173 19596 31700 34101 3674 19271 12331 10573 21233 5284 26653 22274 13573 15446 30610 8596 6824 21265 36979 3675 14435 12764 19593 15426 19627 6937 26480 32632 24618 33035 19628 7055 2846 17716 4290 29795 30753 6148 3819 18891 35783 3598 19696 24030 32891 6911 17646 6910 16615 12692 9176 13589 3517 11813 32456 17623 11397 5278 8153 33009 35356 18760 13262 18102 3083 2716 14440 15449 25746 7239 33727 14438 11026 22181 17713 37800 19624 33086 29215 32450 3782 13554 3685 710 8 9184 6898 9144 17617 14159 9573 25608 11814 23917 10843 7587 7352 8978 24062 3521 6781 35850 33011 36419 8617 28870 17626 6952 17618 12905 33714
5062 20273 9459 35824 2533 2558 6223 1885
5063 30762 32300 27084 27397 27670 17885 32414 32868 32536 33352 27597 27361 30265 27767 16284 36550 30989 28516 27504 24834 24147 37399 27370 33389 32537 33873 3957 36082 35406 31297 26756 24521 37277
5064 2562 15262 1633 26386 25329
5065 6374 28565 6366 28917 37158 37660
5066 3433 5877 6283 20489 13338
5067 2365 7259 4034 1818 300 8369
5068 84 709 3430 87 6252 12946 762 9892
5069 11768 12947 14121 1741 1772 22908 32706 7551 31399 10984 14100 19353 3707 2531 1927
5070 26023 4830 21756 26021 21563 23515 438 20484 26692 506 23576 15351 24424
5071 6926 7643 7085 32911 852 89
5072 5199 1089 25362 13253 23891 13370 1044 11871 13626 29378 8139 1110 556 4506
5073 6001 24009 12654 329 22820
5074 142 21717 375 32525 306 165 23738 377
5075 20716 18856 11099 24392
5076 36582 8813 3717 17291 25199
5077 2365 31841 24684 821 657 82 3083 8427 92
5078 731 3484 730 4917 30342 4086 2951 4996 7982 2786 13139 3497 13584 4711 9172 9206 14573 6820 1003 5351 13501 5698 4087 14561 7138 24606 4498 2641 13681 8295 3683 9246 8594 1018 3778 11303 24588 14949 5665 8984 1019 6905 7833 2638 8706 33443 30043 1682 15700
5079 8469 11253 2143 4653 6554 3275 19220 25815 2104 2126 2478 13759 6502 2527 10700 26907 36013 22422
5080 3804 776 2786 1846 8784 18970 28403 7596 11729 21865
5081 16139 22748 17010 877 25764 27279
5082 8 15 92 1025
5083 5514 665 4996 2763 771 9629 1323 4200 1504 32063
5084 23967 29536 28513 32550 25718 16470 30971 19766 27812 20087 11474 27855 2694 24858 15616 32722 30213 31069 16524 19777 18400 26473 33367 15611 23064 17800 27741 29606 32504 32783 24151 11125 34146 27923 23116 20349 29169 17808 35833 30445 21675 33178 16597 25988 32859 25088 35161 16679 30009 24952 29185 11124 25201 3908 17826 28840 16403 16022 16240 37032 37948 20942 28746
5085 17532 22669 9870 9705 14984 22238 23294 27006 24754 28133 5116 16442 10083 25616 32194 33415 34879
5086 14068 5443 32476 13148 31419 3100 26858 13145 14449 37684 26248 37929
5087 11170 26886 20828 7035 9700 6982 5624 11950
5088 12225 5877 4071 13340 8522 9410 17838 18031
5089 6383 11351 2526 9459 10967 12145
5090 17145 14396 7187 10660 13754 24352
5091 12677 17914 33662 35024 6802
5092 4200 6429 11550 10958 2686
5093 19180 17063 36767 13106 37038 28615 382
5094 5943 22037 30116 15531 15547 24407 26691 5971 12449 3018 508 9970 24008 164 10725 17985 21436 24043 9608 29666 259 22563 31527 17040 202 12476 19922 21774 418 10760
5095 21312 13874 3275 10771 31127 3343 23860
5096 12762 4502 7261 12878 27835
5097 23860 14985 31180 2598 12759 30179 10646 34612 33601 37367
5098 773 738 844 1053 19707 2842
5099 2422 14668 4168 1556 3370
5100 4301 4503 12825 6653 7545 703 769 2756 1003
5101 10690 9363 14765 4072 5254 13125 2470 16744 25357 4483 2496
5102 28587 30864 17002 31379 24518 16342 17980 31156 887 33346 16692 20349
5103 11755 2673 10520 22330 1794 14036 7686 18299 18138 14044 1346
5104 8750 29055 5396 20748 21147 31788 5381 5371 30815 35920 28090 3809 20416 16609
5105 30757 11024 7335 10456 3602 20745 15452 37572
5106 12619 3695 794 7442 14176 3553 4927 22411
5107 25229 7793 11329 36528 9858 1157 4428 7111 2141 1200 3725 7184 11505 4097 6241 7942 1067 5620 25225 32060 6531 32183 27902 28327 4436 4408 14639 20700 4283 9395 23834 13727 4486 29870 888 9851 7105 26448 8858 4466 5616 9857 4434
5108 33131 34771 33673 9310 6342 33958 8566 34083 15786 32650 34487 3206 9031 32844 15781 7845 15680 5027
5109 6593 26809 27320 9551 4557
5110 12312 4505 1330 1983 10316 33560
5111 34664 18785 18107 10486 20418
5112 1187 9397 14983 1571 2144
5113 18671 14654 20819 9542 36706 21356 18979 10377 33011 5278 3807 3584 5380 33413 5685 5655 34613 79 31494 9116 14435 20436 17145 8641 26572 14438 31511 33004 21463 36534 27842 37573 30995
5114 7399 15489 2599 26928 13794 33258
5115 26055 2008 23180 2334 20444 13857 31927 2699 16436 13090 23582 7276
5116 3314 5723 6771 11226 5841 14395 16401 90
5117 2907 3490 3027 12654 4936
5118 14499 18591 29961 29970 27300
5119 36240 20960 30837 16474 27470 27730 24536 15859 32860 19515 30540 24547 27355 27302 35610 34396 10733 32013 24166 26822 28455 31395 26848 26263 20255 29533 21123 36298 16204 27395 4008 22293 28299 18177 30450 36025 18605 26964 30582 33646 23163 34003 17011 20850 34905 25779 18800 4557 31366 25998 36003 18183 24953 17808 23078 3861 17780 33873 32145 31384 28393 31085 31386 21117 28839 37468 25448 35038 33369 37506 28225 34919 18482 16832 36080 36115 36052 26951 38031 36237 33040 37277 35263 24431 37221 38022 33718 16839 37627 37740
5120 945 949 3398 8123 5018 14680 31885 28057 2902 784 11295
5121 8909 7398 2192 2079 1600 1880 23459 9426 1515 22431 28120 2248 14815
5122 3793 15457 9285 3807 13756 24562 1031
5123 1157 2610 9065 32028 33102 5489 31212 15629 6481 19139 27000 8855 15502 20076 31309 19006 6420 9863 11489 30279 34112 37514 11536 33997 37734 6529 32029 4867 27005 16217 9322 300 26224 3013
5124 8597 4326 8634 25408 1001 30293 4111
5125 7846 3206 34547 17510 34631 10189 10584 20607 20985 33137 32835 6379 13328 21033 24309 6286 28552 32575 5027 17042 17212 8109 33841 34744 13339 7840 28550 17263 25963 32815 5892 21089 33133 21106 28296 21795 32821 28366 13363 13362 21062 35187 28551 28778 32654 13351 32832 13350 34705 24440
5126 32944 6134 5394 5180 2832 6870
5127 29062 32427 22084 12196 19039 37014 5300
5128 19764 16600 16657 5249 16241 29008 3930 23965 23264
5129 10048 2849 8968 17451 10617 3307 10827 8636 17702 25895 773 3642 21430 3814 12066 6798 6882 6770 12891 11814 21816 14671 32040 6904 18760 18099
5130 267 248 15032 9922 16233 9489 337 14702 5952 204 5971 294 4752 5915 275 5997 420 16931 468 4725 9508 141 9605 375 12836
5131 16708 16674 16321 3870 18923 7365 20884 26964 18595
5132 3188 27152 27659 26578 32952 33354 35038 37632
5133 6465 17537 24646 35420 34306 37817
5134 1256 12576 1498 22978 8891 12707 1219 15277 1449
5135 2931 5477 10125 22978 5516 6523 7174 5560 4429 7181 13137 2106 19888 6636 33939 20226 28023 1478 8826
5136 37691 3789 18623 26422 32760 11423 3064 9105 7280 30635 11424 3790 5865 766 14846 15413 22549 33019 6944 21823 34553 3678
5137 24579 29053 24461 2796 14404 26012 32633 87 13372 35985 31755 34935 1529 23686
5138 12371 7095 8882 1515
5139 5063 3510 33952 17757
5140 14779 35974 23947 14654 23686 3248
5141 25448 34492 23298 36823 31381 19881 16651 25765 33873 35031
5142 3790 773 19653 2219
5143 12536 705 22133 4583 3307 21747 8750 29210 7832 4087
5144 30273 26964 30872 16679 26955 23343 26961 25220 34699 23055 887 20256 32934 19522 18395 3899 19766 3868 36756 33112
5145 28871 25461 15136 17289
5146 1540 3493 93 2897
5147 31626 31146 29397 6026 15409
5148 14043 35568 1752 15915 32675 33014 14081 28770
5149 5389 3259 1718 13403 22674 9838 22433 5517 15273 6214 11510 1262 30371 37720 33316 37621 6233 7631
5150 10823 5147 8609 4994 9050 1540 77 24717 81 33371
5151 1798 2385 4530 1594 9790 10270 12648 900 4408 1621 10134 9818 10900 4032 29802 30505 4015
5152 9547 11424 7962 24712 34394
5153 2751 654 7233 3678 6056 8403 3064 1444 3502 6798 2958 28086
5154 7001 1928 4565 7000
5155 4402 30810 1382 11661 35244 4075 4328 31688 9574 33376 6575 9838 4173 1136 18500 15664 6531 3702 7638 1104
5156 4402 13744 15105 4449 3733 14413 12391 15 11596 1478 681 18124 13114 10765 810 6523 31924 674 743 12593 12346
5157 3077 8755 6753 17696 5062 18975 4927 13683 3525 5173 5270 5172 3074 1242 5111 3371 1509 1038 7631 11540 23882 21596 8603 16625
5158 10263 10170 8517 21080 13640 13977 1775 34773 23714
5159 19188 16470 27523 18008 25676 27518 36051 32887
5160 36540 35206 16625 33910 13032 27890 20438
5161 21588 23332 16637 3145 26235 5064 21243 14870
5162 5186 12323 7581 3603 12935
5163 13979 18229 36198 26857 36199 12740 17197
5164 27484 23383 16241 20675 27471 27597 21296
5165 14054 14017 1769 7737 13969 12723 13998 18224 14158 971 1302 10553 13326 5439 14004 25468 11789 15867 33725 14085 15856
5166 27915 30529 16700 28513 19178 2270 3738 920 4662 1595 3286 4328 10 5469 30591 33588 12151 7353
5167 3650 3546 17712 4899 7593 2964
5168 3379 9775 1045 1496 7036
5169 1044 1059 6388 7153 2064 26265 19405 769 2795 26742 11894 12899 19454 6121 36868
5170 22428 1056 1189 35275 8730
5171 7643 8340 4312 79 8671 12609 10440 5356 2763 2944 2902 6053 11649 21208 7428 23302 29485 16625 20743 30515
5172 16089 28746 37827 33867 23103 37194
5173 2842 6760 23945 14651 4254 4667 13094 32727
5174 5876 28002 21751 15444 21193 26308 5174 27835
5175 11326 26666 9026 4521 7627 22675 13483 4567 3705 7792 33195 37347 11961
5176 21679 18120 21241 12788 21376
5177 19127 1136 1902 1156 37333 7600 17249 7018 7967 33583 7490 14589 14459 660 1253 7177 2678 9213
5178 731 10052 713 15141 2731 11302 3650 29371 9241 3615 12158 703
5179 3627 1018 5063 14587 15452
5180 7237 18367 21623 34189 2793 24463
5181 1535 14949 7130 76 15219 9559 795
5182 32137 26019 14152 30073 10996 28123 34991 34069
5183 34636 25540 13325 8521 24440 35188
5184 7822 14716 6070 1104 1134 4521
5185 12933 1426 7041 2219 7489 7074 10133
5186 5504 7164 2706 2902 4505 783 715 5147
5187 20642 14265 1364 1709 3600
5188 17130 8463 10044 29509 29057 37343 36155 5291 5163 10028 10910 20429 37234 8051
5189 30229 15529 112 9923 12665 9914
5190 7375 16291 18725 21543 25204 28449 14527 20833 28839 23297 18809
5191 13190 12017 826 10481 8750 75 8281
5192 30028 3612 31762 33569 24715 22873 9537 10993 22875 33821 3218 5741 32335 37086 12854 10324
5193 1944 7570 14731 35966 31691
5194 233 17045 12427 16759 425 14904 346 341
5195 22949 8037 3799 13694 14361 7593 13039 18771 19931 10609 30612
5196 36637 15422 25010 9168 10240 13274 25412 21258 35927 5270 14453 35762 10331 2709 10505 13616 15453 7962 12888 7217 20329 13604 6826 20416 34555 18669 35813 31193 35976 34916 7261 17617 19706 3797 36836
5197 1588 10674 4588 10772 11879 33839 13139
5198 354 496 176 35106 21769 341 164 207 4813 26559 313 31564 22901 31733
5199 8979 5393 5062 9553 7216
5200 1656 8189 7629 2516
5201 7759 19948 13936 15683 37394 1256 36915
5202 32740 30528 30539 17889 36668 18866 31620 869 30285 16487 31068 26597 33856 28746
5203 37621 1264 33584 20318 19127 29090
5204 35387 30372 8538 13738 8809 1617 28597
5205 33782 37059 15966 3143 33649 19884 33346 36102 36955
5206 18916 16352 21287 15614
5207 27788 21183 36309 28542 32856
5208 36137 28830 3856 35317 20947 33831 23699 28392 25853 28658 34996 24185 31089 28396 33739 21651 16007 37846 11474 37874 35462 21682 37500 33863 28839 882 37032 880 13527 27928 37484 36987 34906 28824 16022 37468 31100 37737
5209 1826 8650 6653 7652 9983 773 8427
5210 16019 18400 20174 25160 36332 13695 21538 26640
5211 15 9545 6625 966
5212 1513 13405 1441 14245 927 904 4215 28457 1516 2125 16411 12878 15640 23280 1472 1244 6433
5213 674 6205 8858 10591 9388 1522 33383 26846 13754
5214 24957 24796 21665 23961 16726 20930 17789 16180 29184 26463 35056 24293 18008 31634 27036 31089 23818 20932 36561 34005 16066 31673
5215 3042 4816 24020 24405 36910 22900
5216 1421 11329 1377 6421 26155 7627 31019 35896 15046 2010 3702 13747 12381 15669 26165 15649 2623 37139 1373 5620 30573 4892 1818 11663 1094 6572 5621 2139 2322 3140 12387 6086
5217 9221 905 5518 15079 22426 8540 1397 18135
5218 21508 11596 8485 13861 12056
5219 9044 7845 11128 18233 10153 6334 6351 13084 18805 19954 31898
5220 2806 2784 5020 3259 96
5221 21980 21979 14710 28774 377 162 22898
5222 9800 13128 1036 2417 1598 9822 5462 10005 1046 5577 2458 11547 1902 14340 2803 6649
5223 10651 700 4497 3489 3536 3259 7001 13035 36908
5224 10408 3074 5322 8645 8671 2801 14192 8346 6038 14923 3305 10426 9200 14170 15511 24061 3788 22147 10443 22765 5387 15804 13021 23475 10456 9892 12676 10488 10505
5225 1448 8381 31908 7302 32591 11904 29374
5226 2162 2032 31115 7302 26206 11364 33293 34345 26099 2563 36915
5227 7035 1156 17166 1090 2447 18983 4359
5228 13034 37961 4078 8667 37917 6044 10461 27974 26012
5229 12998 17289 6105 15589 2109 10124 2457 15136 15592 15566 14636 8952 2519 6436 18919 33357 13012 36272
5230 6168 6394 24267 31310 14456
5231 17455 15948 28977 34342 29001
5232 32321 28084 2520 19894 13181 33285 6679 19739 8377
5233 4900 773 3616 7425 6718 5801 3245 5319 5361
5234 7638 17242 30374 7630 4485 1620 13761 24392 11008 7629 19549 17385 4388 13430 5536 1565 36397 17341 11681
5235 4899 3064 30785 15443
5236 773 3483 813 710 2803
5237 23072 2696 19768 26233 20347 26348
5238 15976 877 20188 27851 27923 882 20901 28670 16688 31101
5239 2763 3284 773 14406 772 4509 826
5240 4963 18174 1035 25356 660
5241 19152 15644 15681 19321 9632 12486 6215 12882
5242 24269 1448 2160 25596 4939 11547 31285 34063 19707
5243 1604 1702 4627 11883 31835 4661
5244 14920 30482 21339 36838 33172 35819
5245 3799 13282 9234 8750 7310 771 3529 9580 2723 87 24457 7314 24395 23777 13673 20400 9177 19581 770 1629
5246 9553 796 2806 34783 10486 37416 7158 6431 2397 1104 30783 1541 4502
5247 13627 6223 1974 4374 35126
5248 15821 3158 15846 18923 7387 5249 4772
5249 17069 35631 17571 2983 12664 17574 22490 34997 443 19919 19917 11412 29543 11525
5250 3773 14220 15441 2712 11636 19271 16623 12329 3516 7592 30424 8656 23618 23444 776 11403 31776 8652 3693 12859 35736 15467 24296 29647 22678 5323 770 21527 14535 10750 23945 13487 10599 4510 19629 30756 20745 5068 14433 8578 35089 28944 15458 35208
5251 93 12017 24880 7262 760 21408 19843 9568 5382 16618
5252 17741 28447 14202 37547 22541
5253 661 6403 20799 1264 9789 781 11956 1330 12932 1240 24321 8074 6036 2902 8328 1037 8795 11962 11498 28239 12298 1515 7827 15635 6575 2461 1385
5254 7316 34515 8288 2829 6750 25175 5856 35623 21860 3678 14849
5255 23229 13571 11421 31823 786 10385 25586 92 3701
5256 4388 22600 1427 2443 23473
5257 842 2896 2963 21219 8313 8328 10792 4502 6053 9569 15094 11384 7595 7652 5181 7110 13016 14166 12897 15707 5018 2803 35014 9203 17919
5258 6846 36958 35354 24579 33560
5259 15643 22421 10880 20074 1509 5377
5260 1075 1044 15302 13763 1524 28060
5261 8626 2799 1717 3245 1860 11745 3741 1256 5465 23838
5262 25418 15262 3268 37461 28725 2374 20059
5263 27539 15597 22709 16063 33476 16869 24327 27904 16740 32919 28509 36471 20527 20694 25080 27519 26467 34258
5264 674 1025 2748 2902 3129 2014
5265 8240 7490 2360 8845 13125
5266 25853 37897 34003 15964 16111
5267 11881 31277 20552 6516 17300
5268 7986 12763 2381 25329 35837 1426 2396 36529 20511 25330 26182 2283 3294 14798 15683 37732 17185 29374 11877 36077
5269 3896 33845 16846 19779
5270 1898 13403 10144 1596 34612
5271 8823 34228 2066 5593 1569 7153 4027 20554 20307 11978 4197 3724 1973 1976 7199 12307 35837 7508 2537 30985 7560 25328 12056 2492 12504 30360 9818 37753 3260 2531 36583
5272 2015 15473 5683 9579 35752 5270 20343 3512 32905 847 8406 31703 28265
5273 11454 18933 19259 16255 18928 18744 30181 16845 7377 10282 14272 27981 19190 18918 16316 16408 18452 16334 3896 23316 16683 23021
5274 2782 2775 2851 827 7544
5275 18864 8875 29468 4511
5276 24452 9553 35257 28964 20241
5277 11401 23501 14371 14 4911 29645 11069 13616 32397 16623 11025 8396 7335 25860 18366 14195 13037 28966 34463 9100 5235 29069 10460 34934
5278 10429 11227 25170 36592 3695 10463 11636 22144 6385 34441 12673 3525 24450 30663 22411 18174 15459 5023 9989 22435 22412 9286 9279 30207 25409 28950 13282 12642 7409 10505 4991 4934 22779 26507 8436 4963 10395 16623 12767 5325 35928 30463 3567 10488 35907 4510 21409 29955 10753 33573 31748 31751 15058 3684 14167 33265 8668 6060 33069 15481 24040 30517 16379 10998 10465 35986 15055 33066 35257 30329 33067 15417 2175 20438 10482 30614
5279 22426 9653 24340 20407 1196 1331 2515 2628 37278 11626 9913 2229 14243 2560 2099 30527 8355 2540 2252 4205 4874 1506 24673 1449 9315 4348 25330 2670 23944 13483 2492 25329 6492 2246 33420 14420 33053 1663 26172 1135 18658 9324 20283 1621 2421 15684 1061 17246 7502 2512 37512 1386 19127 9360 7100 38035 15503 25865 2537
5280 14774 26166 1913 12005 12002 5007 27820 14463 10993
5281 17949 19461 31874 28716 17593 19077 17474 26737 19389 25635 17364 26741 21576 32748 32747 34761 25396 36353 33441 32746 34591 21571 37377 23270
5282 23118 32557 23678 25735 33852 23775 18037 29606
5283 3792 10384 9252 5278 5698 12619 786 3651 2906 6151 7811 1017 6046 3771 8307 8983 27799 18173 30155 8656
5284 1807 1202 10640 2071 7302 1905 2026 1984 2459 1426 10883
5285 23123 1847 11829 2354 2149 1607 2008 3343 12389 8719 12027 8469 13820 12396 11257 2468 4270 1946 13176 9535 10058 2915 2050 7398 1496 13842 2279 31976
5286 10392 30629 4078 8695 11894 19902 12810
5287 12996 5772 3294 7557 19539 12753 20219 9427 12853 35689
5288 5110 1035 5266 37758 2199 35388
5289 5584 36388 2476 7636
5290 1257 8900 19224 2359 26179
5291 35740 12786 27614 3952 29755 28383 27083 16660 36130 36205 8231 30017 7328 17862
5292 26702 4557 3355 20353
5293 15595 21753 179 17154 9489
5294 2023 13439 3245 710 15 2867
5295 1157 9819 18050 10324 11576 10139 24324 4103 917 1513 11976 31666 23547 26388 10876 909 1263 23282 22488 3721 12715 14973 3275 1084 10130 2351 18407 13837 1412 2320 2386 2079 23567 2604 34559 24360 22391 26224 1130 13900
5296 20031 4371 12603 19006 9214 14456 3567 5020
5297 3259 6651 5020 4860 1716 11732
5298 27195 3919 8115 10722 32703 19773 28531 36082 27744 38021
5299 27900 27842 73 15492 18110 1444 15506 12538
5300 6416 24840 15270 10717 35531
5301 231 5935 114 425 32094 274 5948 10760 121 240 17070 5555 484 401 181 9606 21777 10728 28620
5302 17635 719 19672 14545 9100 3650 29643 25352 14443 36744 29275 10500 30758 28968 31756 35532 37945 38046 10812
5303 9501 6443 23764 10946 6408 20274 7079
5304 16601 21679 18491 3928 17442 16049 26485 33396
5305 569 993 10021 7534 19033 15612 7997 23930 4858 6640 19042 7660 832 7999 612 5164 8004 12586 12087 1275
5306 31845 1995 2009 30106 2430 11359 5807 7549 2318 2187
5307 7802 24333 4513 13712 12512 5007
5308 11 1187 4648 1031 11745 1026 1406
5309 9216 7809 10833 18636 29273 7079 4963 5380 22234 34474
5310 5211 6969 11659 8763 7921 21558
5311 526 21446 12416 904 14901 22563
5312 14476 1011 13425 8702 10299 8875
5313 1109 7822 11623 1247 10660 1600 2699 904 5228 1430 5518
[truncated: 1,586,241 more chars]
