# Supplementary material for: Research on Recommendation Algorithm of Joint Light Graph Convolution Network and DropEdge
Source: Hindawi journal article supplement (doi:10.1155/2022/3843021), 2022-01-27
Supplement: f1 [file 3843021.f1.zip › 3843021.f1/yelp-train.txt]

0 0 1 2 3 4 5 6 7 8 9 10 11 12 13 14 15 16 17
1 18 19 20 21 22 23 24 25 26 27 28 29 30 31 32 33 34 35 36 37 38 39 40 41 42 43 44 45 46 47 48 49 50 51 52 53 54 55 56 57 58 59 60 61 62 63 64 65 66 67 68 69 70 71 72 0 73 74 75 76 77 78 79 80 81 82 83 84 85 86 87 88 89 90 91 92 93 94 95 96 97 98 99 100 101 102 103 104 105 106 107 108 109 110 111 112 113 114 115 116 117 118 119 120 121 122 123 124 125 126 127 128 129 130 131 132 133 134 135 136 137 138 139 140 141 142 143 144 145 146 147 148 149 150 151 152 153 154 155 156 157 158 159 160 161 162 163 164 165 166 167 168 169 170 171 172 173 174 175 176 177 178 179 180 181 182 183 184 185 186 187 188 189 190 191 192 193 194 195 196 197 198 199 200 201 202 203 204 205 206 207 208 209 210 211 212 213 214 215 216 217 218 219 220 221 222 223 224 225 226 227 228 229 230 231 232 233 234 235 236 237 238 239 240 241 242 243 244 245 246 247 248 249 250 251 252 253 254 255 256 257 258 259 260 261 262 263 264 265 266 267 268 269 270 271 272 273 274 275 276 277 278 279 280 281 282 283 284 285 286 287 288 289 290 291 292 293 294 295 296 297 298 299 300 301 302 303 304 305 306 307 308 309 310 311 312 313 314 315 316 317 318 319 320 321 322 323 324 325 326 327 328 329 330 331 332 333 334 335 336 337 338 339 340 341 342 343 344 345 346 347 348 349 350 351 352 353 354 355 356 357 358 359 360 361 362 363 364 365 366 367 368 369 370 371 372 373 374 375 376 377 378 379 380 381 382 383 384 385 386 387 388 389 390 391 392 393 394 395 396 397 398 399 400 401 402 403 404 405 406 407 408 409 410 411 412 413 414 415 416 417 418 419 420 421 422 423 424 425 426 427 428 429 430 431 432 433 434 435 436 437 438 439 440 441 442 443 444 445 446 447 448 449 450 451 452 453 454 455 456 457 458 459 460 461 462 463 464 465 466 467 468 469 470 471 472 473 474 475 476 477 478 479 480 481 482 483 484 485 486 487 488 489 490 491 492 493 494 495 496 497 498 499 500 501 502 503 504 505 506 507 508 509 510 511 512 513 514 515 516 517 518 519 520 521 522 523 524 525 526 527 528 529 530 531 532 533 534 535 536 537 538 539 540 541 542 543 544 545 546 547 548 549 550 551 552
2 553 554 555 556 557 558 559 560 561 562 563 564 565 566 567 568 569 570 571 572 573 574 575 576 577 578 579 580 581 582 583 584 585 586 587 588 589 590 591 592 593 594 595 596 597 598 599 600 601 602 603 604 605 606 607 608 609 610 611 612 613 614 615 616 617 618 619 620
3 560 558 599 554 565 621 572 577 587 562 622 623 553 568 580 590
4 624 625 626 627 628 629 630 631 632 633 634 635 636 637 638 639 640 641 642 643 644 645 646 647
5 648 649 650 651 652 653 0 69 654 655 656 657 73 658 7 659 660 661
6 662 663 664 665 666 667 668 669 670 671 672 673 674 675 676 677 678 679 680 88 87 681 682 683 684 685 686 687 688 689 690 691 692 693 694 695 696 697 8 698 699 700 701 96 702 703 704 705 706 707 708 709 710 711 712 713 714 715 716 717 718 719 720 721 722 723 724 94 725 726 727 728 729 730 731 732 733 734 735 736 737 738 739 740 92 741 742 743
7 744 745 636 746 747 748 749 750 751 752 753 754 755 756 757 758
8 625 633 637 643 759 688 760 761 762 763 764 715 685 765 766 767 768 90 769 770 771 772 773 774 87 665 775 776 777
9 778 779 780 781 782 783 15 784 785 786 787 788 789 790 791 792 793 794 773 795 796 696 797 798
10 665 799 800 801 802 803 659 804 786 805 674 79 676 806 807 808 809 810 811 812 813 87
11 813 814 815 816 817 818 686 82 819 711 820 821 822 823 762 824 825 826 655 649 827 11
12 609 567 573 828 621 596 585 623 593 566 594 598 829 561 830 586 607 831 608 583 832 833 603 616 834 835 836 581 837 838 839 840 841
13 842 843 844 653 845 697 696 846 786 847 783 848 849 850 851 852 819 853 854 855 856 857 858 859 804 860 861 862 863 864 865 866 657 867 91 868 703 869 870 871 872 873 874 875 876 877 878 879 880 881 882 883 884 885 886 887
14 888 889 890 891 892 893 780 894 895 896 897 898 899 900 901 902 799 903 904 905 906 907 908 909 910 911 912 913 914 915 916 917 918 919 920 921 922 923 924 925 926 927 928 929 930
15 931 932 933 934 935 936 1 937 938 2 939 940 941 942 943 944 945 946 947 948
16 949 932 947 950 941 934 1 940 936 2 951 944 943 937 952 938 953 954 651 626 627 955 632 956 957 631 958 959 960 961 962 630 963 964 965 966 967 968 969 970 971 972 973 974 975 976 977 978
17 558 843 821 979 980 88 657 981 767 709 982 565 572 587 983 576 600 594 984 985 597 986 601 987 574 579 988 577 582 989 838 596 990 593 991 586 992 612 993 554 994 562 995 557 996 997 998 571 599
18 760 765 87 999 764 827 762 1000 1001 1002 1003 1004 1005 1006 1007 1008 1009 1010 1011 1012 1013 1014 1015 1016 1017 1018 1019 696 1020 1021 657 1022 1023 1024 1025 786 1026 1027 1028 1029 1030 1031 13 1032 1033 1034 1035 1036 1037 1038 1039 1040 1041
19 1042 1043 4 1044 1045 1046 1047 1048 1049 659 893 1050 1051 1052 1053 1054 1055 1056 1057 1058 1059 1060 781 1061 1062 1063 1064 1065 888 1066 1067 1068 1069 780 782 1070 1071 1072 1073 1074 1075 1076 1077 1078 1079 1080 1081 1082 1083 1084 1085 1086 1087 1088 1089 1090 1091 1092 1093 1094 779 1095 1096 1097 1031 1098 1099 1100 1101 1102 1103 1104 1105 799 914 1106 1107 1108 1109 1110 1111 1112 1113 1114 1115 1116 1117 1118 1119 1120 1121 1122 1123 1124 1125 1126 1127 1128 1129 660 1130 1131 1132 1133 1134 1135 1136 909 1137 1138 1139 1140 1141 1142 1143 1144 1145 1146 1147 1148 1149 1150 1151 1152 1040 1153 1154
20 1155 1156 1093 1157 1158 1159 1160 1161 1162 1163 1164 1165 1166 1167 1168 1169 1170 1171 1172 1173 1174 1175 1176 1177
21 1178 1179 1180 1055 1072 1181 1182 1183 1141 1184 1185 1186 1187 1095 1188 1142 1189 1190 1191 1192 1193 1089 1194 1195 1196 1197 1048 1198 1199 1200 1110 1201 1202 1203 1204 1205 1206 1207 1208 1086 1209 1210 7 1211 1212 1213 1056 1214 1215 1216 1217 1218 1219 1220 1221 1222 1223 1051 1224 1225 1226 1227 1228 1229 1230 1231 1232 1233 1234 1235 1236 1237
22 1134 1238 1109 1239 1240 1241 1242 1243 1244 1245 1246 1247 1248 1249 1250 1251 1252 1253 1254 1255 1256 1257 1258 1259 1260 1261 1262 1263 1264
23 608 558 1265 586 1266 1267 592 1268 576 1269 566 619 1270 555 1271 563 1272 1273 1274 985 1275 1276 1277
24 632 1278 642 1279 1280 1281 1282 1283 1284 1285 1286 1287 1288 958 625 1289 1290 1291 1292 1293 1294 1295 1296 1297 960 1298 1299 1300 1301 1302 1303 1304 1305 1306 1307 1308 637 1309
25 604 1310 566 1311 592 1312 574 554 562 1313 572 996 587 989 593 594 598 565 569 605 586
26 1314 1054 1315 1060 1316 1254 1317 1318 1319 1320 1321 1322 1323 1324 1325 1326 1327 1328 1329 1330 1331 1132 1249 1332 1333 1334 1335 1336
27 651 1337 625 1280 1338 1282 1339 646 1340 638 1341 637 954 957 1342 1343 632 640 1281 958 1344 1345 1346 1347 1348 1349 1350 1351 1352 1353 1354 1355 1356 1357 1358 1359 1360 1361 641 1362 1363 1364 1365 1366 1367 1368 1305 1303 1279 1369 1370 1371 1372
28 1373 1374 1229 1033 1375 1376 1377 1111 1378 1379 1380 1381 1382 1383 1183 1384 1149 1385 1386 1387 1104 1388 1152 1146 1389 1185 1390 1391 1392 1393 1394 1395 1396 1397 1398 1064 1399 1400 1401 1402 1403 1404 1405 1406 1407 1408 1076 1409 1410 1411 1075 1412 1413 1414 1415 1416 1417 1418 1108 1419 1109 1420 1421 1422 1234 1423 1424 1425 1426 1427 1428 1429 1430 1431 1432 1433 1434 1435 1436 1437 1438 1439 1440 1441 1442 1443 760 1444 1445 1446 1447 1448 1449 1450 1451 904 1452 1453 1454 1322 1253 1455 1119 1456 1095 1457 1320 1458 1459 1460 1461 1462 1463 1122 1464 1240 1465 1466 1467 1468 1469 1470 1471 1472 1473 1474 916 1475 1476 1477 1478 1479 1039 1480 1481 1250 1482 1483 1484 1485 4 1486 1487 1488 1030 1489 1490 1491 1492 1493 1066 1494 1495 1037 1496 1497 1498 1174 1499 1500 1501 1502 1503 1504 1505 1506 1507 1508 1509 1510 1511 1134 1512 1513 1514 1515 1516 1517 1518 1519 1520 1521 1522 1523 1264 1524 1525 1526 1527
29 1528 665 69 760 0 1000 1529 812 1530 649 686 762 1531 82 1532 709 1533 868 1534 800 1535 845 87 688 1536 1537 722 682 1538 1539 816 683 1540 786 1541 1542 1543 1544 669 848 657 653 1545 75 1002 1546 674 1547 1548 1549 650 654 1550 817 854 823 851 1551
30 1046 1552 1059 1060 1553 1554 1555 1556 1557 903 1558 1559 1560 1561 1052 1562 1072 1563 1143 1064 1564 1565 1566 1567 1071 780 781 1568 1404 1569 1570 1090 1571 1572 1573 1574 1575 919 1576 1577 1088 1578 1069 1579 1580 1238 782 1581 1582 1583 1584 1585 1258 1067 1586 1587 1588 1093 1589 1590 1591 1592 1593 1594 1098 1595 1596 1597 1598 1599 1600 1218 1601 1602 1603 1604 1605 1606 1607 1608 1609 1063 1610 1202 1611 1612 1613 1614 1615 1616 1617 1618 1619 1620 1621 1622 1623 1624 1336 1625 1536 1626 1627 1628 771 1629 1630 1631 1632 1633 1634 1635 1636
31 1107 1130 1637 1518 1056 1638 1639 1640 1134 1641 1642 1376 1643 1503 1214 1146 1110 1189 1116 1149 1644 1645 1323 1646 1647 1126 1648 1649 1650 1651 1652 1653 1100 1654 1655 1656 1657 1658 1659 1660 1661 1662 1451 1148 1663
32 1664 835 1665 1666 1667 558 1668 608 623 1669 1670 610 1671 1269 1672 986 1673 985 994 613 563 995 838 1674 1675 1676 1677 596 616 572 1678 1679 586 1680 1681
33 1528 816 662 783 1682 649 87 688 1529 1683 682 1684 721 810 1685 1541
34 1686 1687 1688 1689 1690 1691 1692 1693 1694 1695 1696 1697 1698 1699 1045 1700 1701 1702 1703 1704 1705 1706
35 821 842 1543 8 657 854 1707 981 1551 1532 843 1708 87 88 688 1709 662 1542 1710 96 1711
36 1712 1055 1227 1713 1714 1715 1060 8 1716 762 1717 1718 1719 730 783 817
37 1720 1721 1722 645 1339 1293 1723 1724 1725 1279 1726 1727 1728 1729 1730 1731 1732 1733 1306 625 1298 1305 1734 1735 1736 1737 803 1738 1739 633 1740 1741 1742 1743 1744 1745 1746 1747 1748 1360 1368 1749 1750 1751 1752 1753 1754 1755 1756 1757 638 1758 1759 1760 1761 1352 1338 1762 1763 1764 1765 1766 1767 1768 1349 1769 1770 1771 1772 1773 1774 1775 1776 1777 1297 1778 1361 1779 1780 1781 1782 960 1346 1783 1784 1785 1786 1787 1788 1789 962 1790 1791 1792 1793 1794 1795 1796 1797 1798 1799 1800 1172 1801 1802 1803 1804 1805 1806 904 1048 1807 1808 1809 1810 1811 1812 1813 1814 1815 1816 1817 1818 1819 1820 1821 1822 1823 1824 1825 94 1826 1827 1828 5 1829 1830 1831 1001 799 1832 1833 1834 1835 1836 1837 1838 1839 906 1840 1841 1842 1843 1844 1845 1846 1847 1848 1849 1850 1690 1851 1852 1696 1688 1853 1854 1102 1855 1856 1857 821 1196 981 1858 1859 1860 930 1861 1862 1863 1864 1865 1866 1867 1868 1869 1870 1871 1872 1873 1874 1875 1876 1877 1878 1879 1880 1881 1882 1045 1883 899 1884 1885 1886 1887 1888 1889 1890 1891 1597 1892 1893 1894 1895 1077 1896 1486 1897 1898 918 1569 1899 1900 1901 1902 1903 1904 1905 1906 1907 1908 1909 1910 1911 1912 1913 1914 1915 1199 1916 1917 1918 1919 1920 1921 1922 1923 1924 1925 1926 1927 1928 1929 1930 1931 1932 1933 1934 1935 1936 1937 1938 1939 762 1940 1941 1942 1943 1944 1945 1946 1947 1948 1949 737 1950 1951 1952 1953 1954 1955 1956 1957 1170 1225 1958 1959 1960 1961 1962 1176 1963 1964 1965 1966 1967 1968 1633 1969 1970 1200 1971 1972 1973 1974 1975 1976 1977 1978 1979 1980 1438 1981 1982 1983 1984 1985 1426 1986 1987 1988 1989 1990 1053 1991 1992 1993 1994 1995 1996 1997 1998 1999 2000 2001 2002 2003 2004 2005 2006 2007 2008 2009 2010 2011 1484 2012 2013 2014 2015 2016 2017 783 2018 2019 2020 2021 1639 2022 2023 660 2024 1220 2025 2026 2027 2028 2029 2030 2031 2032 2033 2034 2035 2036 2037 1056 2038 2039 2040 2041 2042 2043 1142 2044 2045 2046 2047 2048 2049 2050 2051 2052 2053 2054 1031 2055 2056 2057 2058 2059 2060 2061 781 2062 13 2063 2064 2065 2066 2067 2068 2069 2070 2071 2072 912 2073 2074 2075 2076 2077 2078 2079 2080 2081 2082 1404 2083 2084 2085 1164 2086 2087 2088 2089 2090 2091 2092 2093 2094 1509 2095 2096 2097 2098 2099 1193 2100 2101 2102 2103 2104 2105 2106 2107 2108 2109 1465 2110 1442 2111 2112 2113 2114 2115 2116 2117 2118 1454 2119 2120 2121 2122 2123 1496 1232 2124 1089 2125 2126 2127 2128 2129 2130 2131 2132 2133 2134 2135 2136 1075 2137 2138 2139 75 2140 2141 1418 2142 2143 2144 2145 2146 2147 2148 2149 2150 2151 2152 2153 2154 2155 2156 2157 1715 2158 2159 1166 2160 2161 2162 2163 2164 2165 2166 2167 780 666 2168 722 668 2169 669 1627 1508 2170 2171 2172 2173 2174 2175 2176 2177 2178 2179 2180 723 2181 2182 852 2183 2184 82 2185 2186 1604 1114 2187 2188 2189 2190 2191 2192 2193 2194 2195 2196 909 2197 2198 2199 2200 2201 2202 2203 2204 2205 2206 2207 2208 2209 2210 2211 1255 2212 2213 2214 2215 2216 2217 2218 2219 2220 2221 2222 2223 2224 2225 2226 2227 2228 2229 2230 2231 2232 2233 2234 2235 2236 2237 2238 2239 2240 2241 2242 2243 2244 2245 2246 2247 2248 2249 2250 2251 2252 2253 2254 2255 2256 2257 2258 2259 2260 2261 2262 1655 2263 2264 2265 2266 2267 2268 2269 2270 2271 2272 2273 2274 2275 2276 1095 2277 2278 2279 2280 2281 2282 2283 2284 2285 2286 2287 2288 2289 905 2290 2291 2292 2293 2294 2295 2296 2297 2298 2299 2300 2301 2302 2303 2304 2305 2306 2307 2308 2309 2310 2311 2312 2313 2314 2315 2316 2317 2318 1035 2319 2320 2321 2322 2323 2324 2325 1527 2326 2327 2328 2329 2330 2331 2332 2333 2334 2335 2336 2337 1702 2338 2339 2340 2341 2342 2343 2344 2345 2346 2347 2348 2349 2350 2351 2352 2353 2354 2355 2356 1072 2357 2358 2359 2360 2361 2362 2363 2364 2365 2366 2367 2368 1084 2369 1208 1245 2370 2371 2372 2373 2374 1701 1231 2375 2376 2377 2378 2379 2380 2381 2382 2383 2384 2385 2386 2387 2388 2389 2390 2391 2392 2393 2394 2395 2396 2397 2398 1212 2399 2400 2401 2402 2403 2404 2405 2406 2407 2408 2409 2410 2411 2412 2413 2414 2415 2416 2417 2418 2419 1130 2420 2421 2422 2423 2424 2425 2426 2427 2428 2429 2430 2431 2432 2433 2434 2435 2436 2437 2438 2439 2440 2441 2442 2443 1424 2444 2445 2446 1661 2447 2448 2449 2450 2451 2452 2453 2454 2455 2456 2457 2458 2459 2460 1073 2461 2462 2463 2464 2465 2466 2467 1638 2468 2469 2470 1049 2471 2472 2473 2474 2475 2476 2477 2478 2479 2480 2481 2482 2483 2484 2485 2486 2487 2488 2489 2490 2491 2492 2493 2494 2495 2496 2497 2498 2499 2500 2501 2502 2503 2504 2505 2506 2507 2508 2509 2510 2511 2512 2513 2514 2515 2516 2517 2518 2519 2520 1602 2521 2522 2523 2524 2525 2526 2527 2528 2529 2530 2531 2532 2533 2534 2535 2536 2537 2538 2539 2540 2541 1580 2542 2543 2544 2545 2546 2547 2548 2549 2550 2551 2552 2553 2554 2555 2556 2557 2558 2559 2560 2561 2562 2563 2564 2565 2566 2567 2568 2569 2570 2571 2572 2573 2574 2575 2576 2577 2578 2579 2580 2581 2582 1067 2583 2584 2585 2586 2587 2588 2589 2590 2591 2592 2593 2594 2595 2596 2597 2598 2599 2600 2601 2602 2603 2604 2605 2606 2607 2608 2609 2610 2611 2612 2613 2614 2615 2616 2617 2618 2619 2620 2621 2622 2623 2624 2625 2626 2627 2628 2629 2630 2631 2632 2633 2634
38 654 1551 868 1717 1534 93 0 1323 1537 807 2635 2636 760 669 2637 817 1860 764 813 649 786 2019 2638 709 87
39 696 2639 2640 1000 82 688 2641 2642 855 827 649 1716 710 2643 2644 981 670 1024 2637 814
40 2645 2646 746 2647 2648 2649 2650 2651 2652 2653 750 2654 2655 2656 2657 2658 2659 2660 2661
41 2662 1054 1050 1639 2663 1573 2664 2665 2110 1972 2666 1619 2667 1607 2668 2669 1060 2670 1645 2671 2672
42 69 2673 2674 2675 2676 2677 2678 2679 2037 1056 2680 1112 1142 2681 2682 2683 1157 1080 2684 2685 1901 1090 2686 659 1103 2687 660 661 2688 13 2689 2690 2691 2692 2693 876 2694 2695 2696 2697 2698 2699 2700 2701 2702 1794 2703 2704 2705 3 774 2706
43 1538 682 1065 779 652 1529 2707 669 2637 981 11 1548 654 1060 2708 826 2709 821 8 657 653 1716 827 710 709 762 845 1717 2710 16 2711 2712 2017 0 786 2713 1545 721 1532 2714 1541 1546 2715 2124 706 2716 1533 2717 2636 670 711 666 1683 2718 1443 761 2719 2720 2721 824 1685 714 2638 1001 2722 1707 649 1544 2723 2724 656 2725 2726 737 2727 1195 2728 2729 1684 712 715 2730 2731 2732 2733 2734 769 2735 788 2736 2737 2738 2739 2740 2741 77 772 70 2742 2743 2744 2745 2746 2747 2748 1528 813 760 2749 2750 2751 2752 1003 1531 2753 2754 2755 2756 2757 1629 2758 807 771 9 2759 2760 2761 2762 1626 2763 17 1534 2764 800 2765 2766 2767 2768 2769 12 2770 2771 665 2772 1004 2773 2774 2775 2776 2777 2778 2779 2780 2781 2782 774 776 2783 2784 2785 787 1860 2012 2786 855 2787 2788 2789 2790 2791 1025 794 2792 2793 2794 2795 2796 2797 2798 2799 2800 2801 2023 2802 795 2803 2804 2805 2806 2807 2808 2809 2810 2014 2811
44 1544 817 827 1549 743 1005 11 96 2812 69 1545 2638 87 845 2813 1937
45 0 649 2017 2749 769 2814 657 1860 1628 1549 654 2638 8 788 710 1004 771 2787 12 666 2815 2816 2817 1683 2818 2763 11 2819 2820 1003 1006 2821 2742 2822 2823 1025 2824
46 682 807 1540 1542 846 848 11 857 859 1531 810 650 762 1533 852 845 844 1544 724 2825 2826 2827 2828 2829 2830 2831 2832 696 770 2833 2834 2835 2020 2836 2837 2838 2785 703 2839 2840 2841 2842 2843 2844 2845 2846 2847 2848 2736 2849 2850 2851 2852 2853 2854 2855 2856 2857 740 2858 2859 2860 2861 2862 2863 2864 2865 2866 2867 2868 2869 2870 2871 2872 2015 2873
47 737 847 848 709 1717 1547 845 819 88 2874 2875 2876 2877 2878 2879 2880 2881 2882 842 711 2883 2884 2885 2886 2887 2888 769 2737 2022 2889 2890 2891 1540 2892 2893 2894 2748 2017 2895 2635 90 2869 2896 2012 2013 2897 2898 2899 2900 2901 2902 2903 2904 2905 2906
48 669 657 2907 1716 2794 0 2729 2908 2764 2772 2738 2909 807 2874 762 2800
49 2910 781 2134 1057 1046 2911 1064 1250 1478 2912 2913 1482 2914 2915 1042 2916 2422 1982 2917 2918
50 2919 592 568 563 572 1677 1679 994 582 992 2920 1668 2921 1675 2922 2923 2924
51 8 762 706 92 1540 2925 2738 1530 2754 2643 2926 2927 2749 2756 737 2928 1539 2718 2929 2930 818 1617 2931 2932 2933 2934 2935 774 2936 2937 2867 2938 2939 2940 2941 2942 2943 2944 1718 2945
52 2946 665 1540 2947 2948 2949 2950 2951 2771 2640 2952 2953 1718 2954 2955 2956 2957 2958 2959 92 696 16 2637 669 652 2960 79 852 2961 680 2962
53 783 649 807 2959 1538 8 2963 2964 2965 2714 2908 2765 696 769 2017 2768 2966 2747 0 657 2909 786 2967 2968
54 2969 1473 2970 2971 2972 1593 2973 1654 1051 1109 2974 909 1797 1066 1048 1611
55 2975 2976 2977 2978 2979 193 2980 2981 2982 394 475 113 504 2983 2984 2985 19 2986 2987 2988 189 2989 135 2990 2991 2992 2993 2994 2995 520 2996 395 2997 505 416 2998 2999 330 219 3000 3001 3002 3003 495 248 492 3004 3005 3006 3007 300 3008 368 537 344 508 36 3009 3010 200 543 3011 449 3012 3013 3014 277 3015 3016 3017 3018 3019 3020 3021 3022 3023 3024 477 3025 3026 3027 481 507 3028 401 3029 3030 535 472 3031 491 3032 3033 3034 3035 190 400 160 3036 311 3037 3038 3039 3040 3041 3042 3043 3044
56 685 3045 3046 3047 3048 3049 3050 693 87 3051 3052 3053 1551 812 3054 3055 1717 3056 826 3057 3058 855 737 2718 3059 2815 2904 3060 2880 3061 3062 3063 3064 743 3065 3066 3067 3068 3069 3070 3071 2949 786 3072 3073 3074 3075 3076 3077 3078 3079 3080 3081 3082 3083 811 3084 3085 3086 3087
57 1310 597 985 838 576 608 574 1680 558 1679 598 3088 554 573 3089 3090 836 566 3091 3092
58 3093 625 1280 974 969 651 640 1309 646 759 1349 3094 645 3095 3096 3097 3098 641 3099 3100 3101 629 3102 1299 1345 3103 973 3104 3105 3106 1350 3107 3108 968 3109 3110 3111 3112 3113 626 3114 3115 632 3116 3117 3118 3119 630 1346 956 1364 3120 3121 3122 3123 977 966 3124 1351 3125 1357 3126
59 935 940 943 3127 2978 937 3128 3129 730 3130 728 3131 2941 3132 1940 87 94 3133 92 3134 3135 3136 3137 3138 3139 3140 3141 1633 93 3142 3143 3144 3145
60 1716 3146 3147 3148 3149 3150 3151 3152 877 3153 3154 3155 3156 3157 3158 3159 3160 3161 3162 3163 3164 3165 3166
61 0 3167 1709 665 1545 13 786 823 87 2813 16 2720 762 738 657 1445 710 3168 824 96 3169 862 3170 717 3171 1014 3172 883 3173 3174 3175 3176 3177 3178 3179 3180 3181 3182 3183 3184 3185 3186 3187 3188 3189 3190 3191 3192 3193 3194 3195 3196 3197 3198 3199
62 749 3200 752 3201 746 757 2649 3202 3203 3204 624 3205 2652 3206 3207 3208 3209 3210 3211 3212 3213 3214 3215
63 1196 1552 3216 3217 2334 3218 3219 1966 1887 3220 1955 1812 3221 1972 2445 1323 3222 3223 1324 3224 3225 3226 909 3227 3228 3229 2291 3230 2485 2283 2547 3231 3232 3233 3234 3235 912 3236 2434 3237 2457 3238
64 2134 3239 786 3240 3241 3242 1709 762 3243 81 3244 826 1682 12 3245 2012 3246 2781 785 3247 3248 3249 703 3250 814 3251 3252 3253 3254 1540 3255 3074 3256 3257 3258 3259
65 1157 3260 1833 3261 1058 1155 665 786 1143 649 1892 648 1558 1189 3262 3263 1055 3264 3265 1065 1613 2259 1064 1051 3266 3267 3268 1200 3269 3270 1537 2737 2741 69 2638 3271 16 1102 1031 3272 3047 3273 1111 1808 3274 3275 3276 1533 2179 652 3277 1541 1717 868 738 3278 2678
66 665 3279 2713 3280 93 3281 3282 3283 3284 3285 1170 3286 1078 3287 1049 802 3288 1616 4 1566 3289 3290 1709 3291 3292 821 2206 3293 3294 3295 3296 6 3297 768 771 3298 3299 3300 2914 1048 1152 1111 3301 3302 3303 3304 3305 3306 3307 3308 693 2830 2835 3309 3310 842 3311 3312 3313 3314 3315 3316 3317 3318 3319 3320 3321 3322 3323 3324 3325 3052
67 3129 767 760 786 0 669 823 3326 1446 3046 88 3102 3117 3327 3328 3108 3329 966 3121 3330 1309 1351 3331 643 1350 957 630 642 973 649 1001 11 632 1542
68 722 3332 0 786 760 8 669 1548 654 657 2792 1550 16 649 827 710 2812 1551 709
69 3333 1946 3334 649 3335 1966 3336 3337 817 1843 1046 3338 1540 868 3339 1699 3340 3341 3342 3343 3344 3345 3227 1611 13 87 743 2720
70 1187 3346 893 1208 662 656 3347 3348 648 3349 3350 3351 3352 3353 3354 3355
71 8 11 710 1532 3356 3357 1805 1121 1109 2669 3358 3359 2255 3360 2111 3361 3362 1424 1910 3234 3363 3364 2244 1810 3365 3366 3367 3368 3369 3370 1615 2135 3371 3372 3373 3374 3375 3376 3377 3378 3379 2193 3380 1457 3236 3381 3238 3382 2292 2093 2009 3383 1378 3384 3385 2187
72 3386 3387 3388 937 3389 939 952 3390 3391 3392 3393 3394 1 3395 3396 3397 3398 3399 3400 3401 947 3402 945 3403 3404 932 3405 3406 3407 950 3408 3409 949 951 3410 931 3411 3412 942 938
73 891 3413 13 3414 3276 1115 3415 3416 1195 3417 3418 0 685 686 3419 3420 79 676 96 821 712 3421 2635 657 855 3422 813 3277 3132 868 2019 1532 3423 709 2769 3307 2866 786 3424 2812 3047 3425
74 0 669 1550 686 1445 827 82 1532 87 826 92 93 1545 3426 3277 868 2964 786 3053 2955 824 3427 3428 3421 1002 3429 1718 3430 2908 3281 2693 3431 3432
75 636 3433 3434 3435 3202 3212 3436 3437 756 3215 3438 3439 3440 758 3441 3442 3443 3444 3445 3446 3447
76 3448 1381 3449 1960 3450 3451 3452 1375 3333 3453 1143 3454 3455 2969 1961 3456 3457 2273 3458 3459 3460 1437 3343 1418 3461 1814 3335 3462
77 3463 3464 3465 3466 3467 3468 984 3469 3470 3471 3472 3089 3473 2920 3474 3475 3476 3477
78 87 694 8 3478 3167 3479 93 3480 657 1684 827 824 3481 2766 3429 1005 826
79 816 3482 1548 807 3483 762 3484 786 1443 3485 868 1941 1001 657 981 3486 1716 68 3487 3488 3489 680 2874 3490 675 81 3491 3045 3492 3493 3494 826 1709 3083 3495 669 8 731 685 3496 3497 710 3498 1718 1682 88
80 1550 1546 1717 3495 3499 3500 824 3501 3502 3503 724 3083 3504 786 657 3505 703 80 860 3506 88 3507 3508 3509 13 3510 3511 3512 3513 708 2826 3514 666 716 3515 816 3516 709 3517 2775 1538 2904 711 3518 3519 3520 3521 3522 3523 3524 3525 3526 742 11 2721 3527 3528 3529 3530 699 3531 737 1545 3532 3533 3534 3535 3536 842 813 3537 3538 3539 2882 2896 3540 3541 2320 3542 3543 3544 3545 3546 3242 1001 3547 3548 3549 3493 2965 3550 2720 1443 3551 3552 3553 3554 736 2961 3555 79 3556 3557 3558 3559 3560 857 3561 3562 3563 3564 693 3565 1444 3566 3567 3568 729 3569 2854 3570 3571 3572 3573 2017 70 3574 3575 3576 2964 2729 3577 3578 713 3579 2766 3580 3581 710 3582 843 811 3583 761 3584 3585 1005 3586 2787 668 3587 3588 3589 3424 3590 3591 3592 3593 3594 3595 3596 3075 847 2020 2960 3597 2731 2732 696 3598 3599 845 2886 3600 3601 3602 3603 3604 3605 3606 2928 3607 3608 783 3609 3610 3611 3612 2012 3613 3614 3615 3616 3617 3618 726 3619 3620 3621 3622 3623 1015 3624 652 3625 2925 3626 2835 3627 3628 3291 3629 1937 701 3630 3631 3632 3284 3633 3634 3635 3320 3636 3637 3638 3639 3640 3641 740 3642 3643 3644 2898 3645 2179 3646 3647 3648 2895 3649 3650 1534 3651 3652 3653 2848 3654 3655 3656 3657 3658 3659 2868 3660 3661 3662 704 3663 3664 3665 3666 3667 3668 3669 3670 3671 3672 3673 3674 3675 690 3676 3677 3678 3679 3680 3681 3682 3306 3683 3684 3685 3686 3687 3688 3689 3057 3690 3691 3692 3693 3694 3695 3133 3696 3697 3061 3698 3699 3700 3701
81 3702 2357 1377 1385 3703 1097 2310 1053 1104 3704 2125 3705 3706 3707 3708 1879 3709
82 3710 3711 2125 1176 3712 1967 3713 3714 1254 2609 1848 2333 1976 3715 1170 909 1119 1127 3716 1581 3717 900 3718 3719 1125 1135 3720 3721 3722 3723 3724 3725 1156 1993 3726 3727 3728 1426 3729 3730 3731 1570 3732 3733 3734 3735 3736 929 3737 3738 3739 3740 3741 3742 3743 1056 3744 3745 3746 3747 899 3748
83 1052 1086 1057 893 1721 1646 1114 1058 3749 3750 1165 3751 3752 3753 1236 1149 1104
84 2925 817 1716 852 1540 3754 3514 77 3755 3756 3129 3757 3758 3759 2785 3760 3504 3761 3518 811 3608 3626 1860 3762 3763 3764 3597 3609 3765 3766 3767 3768 3636 3769 3647 3770 3771 3772 3773 3774 773 3678 2744 3775 3776 3777 3651 3778 3779 3524 2786 3780 3781 3782 3783 3784 3785 3604 3568 711 703 3786 3300 1018 3787 3788 3789 3790 3791 2902 3792 2801 3793 3794 3795 3796 3797 3672 3573 3798 3319 3554 3799 3503 3800 3801 3802 3699 3803 2763 3804 3805 3806 3679 3807 3808 3809 3810 79 3811 3812 3813 3814 3815 3659 3324 3816 3817 3818 3245 3819 3482
85 1646 1431 762 852 1064 2775 3820 1316 1068 1156 1040 3821 3261 2025 909 1559 1046 1983 1566 3822 1049 1323 799 3285 3823 1045 3824 3825 3826 1557 1586 900 3827 3828 1067 2632 3829 3830 1134 1107 3703 1053 3831 1143 1091 1071 3832 3833 3834 1069 3835 1054
86 994 3836 2654 3837 3838 3839 3840 3841 3842 3843 3844 3845 3846 3847 3848 3849 3850 3851 3852 3853 3854 3855 3856 3857 3858 3859 3860 3861 3862 3174 3863 3864 3865 3866 3867 3868 3869 3870 717 3871 3872 3873 3874 3875 3876 3877 3878 3879 3880 3881 3882 3883 3884 3885 3886 3887 3888 3889 3432 3890 3891 3892 3893 3894 3895 3896 3897 3898 3899 3900 3901 3902 3903 3904 3905 3906 3907 3908 3909 3910 3911 3912 3913 3914 3915 3916 3917 3918 3919 3920 3921 3922 3923 3924 3925 3926 3927 3928 3929 3930 3931 3932 3933 3934 3161 3935 3936 3937 3938 3939 3940 3941 3942 3943 3944 3945 3946 3947 3948 3949 3950 3951 3952 3190 3953 3954 3955 3956 3957 3958 3959 3960 3961 3962 3963 3964 3965 3966 3967 3968 3969 3970 3971 3972 3973 3974 3975 3976 3977 3978 3979 3980 3981 3982 3983 3984 3985 1011 3986 3987 3988 3989 3990 658 3991 3992 3993 3994 3995 3996 3997 3998 3999 4000 4001 4002 4003 4004 4005 4006 4007 4008 4009 4010 4011 4012 4013 4014
87 4015 4016 4017 3048 4018 4019 4020 659 4021 1785 1094 4022 1591 4023 1045 1069 1323 1552 4024 4025 4026 1820 4027 4028 4029 1566 919 4030 888 1046 4031 4032 1064 1149 903 3712 1570 4033 1426 1130 4034 1156 1598 4035 1619 909 4036 4037 4038
88 949 3395 4039 2 3402 3392 4040 4041 4042 940 4043 4044 4045 4046 4047 4048 3406 4049 4050 4051 4052 3399 953 4053 947 4054 952 3407 4055 950 3391 4056 4057 4058 4059 4060 3401 3412 4061 4062 4063 3389 4064 4065 4066 4067 2649 4068 4069 746 744 4070 4071
89 1654 1146 4072 3333 1848 4073 4074 4075 1040 3729 1149 1138 1399 1510 908 4076 4077
90 4078 3540 3556 2641 4079 3503 4080 2716 4081 4082 4083 4084 4085 3585 4086 4087 4088 4089 4090 3507 710 4091 3603 4092 4093
91 16 1684 8 827 710 807 11 981 820 1005 4094 824 721 2765 816 2904
92 4095 69 683 0 82 1848 4096 93 1718 4097 4098 2255 3272 1238 4099 1721 1134 1089 1965 4100 4101 4102 783 823 2643 1660 2282 3268 1442 1111 1152 1138 1243 4103 1231 1191 1399 4072 4104 1611 1105 4105 1149 4106 1577 1518 1031 1053 3266 2096 1971 4107 4108
93 3500 654 1716 1005 2765 1002 2638 3538 2179 3132 653 4109 786 4110 8 75 649 1445 868 1532 765 826 87 4111 93 13
94 1031 4112 4113 1048 1051 1117 4114 1229 1102 1121 4115 4116 1134 1870 2226 1965 1939 2330 4117 2259 2973 1130 1109 2071 2911 1875 1995 4118 1164 1646 1057 3729 1043 1138 3271 1563 4119 1116 4120 1798 4121 4122 4123 2158 1331 1076 1832 1463 1604 781 1176 1228 1407 1107 1151 4124 1446 4125 4126 1040 1192 4127 1183 4128 4129 1410 4130 1111 929 1378 4131 2542 4132 4133 4134 1124 1152 1987 1401 1399 3377 1518 4135 1453 1837 1064 661 4136 4137 1439 1393 3739 4138 1052 2131 4139 4140 1662 1846 1561 1108 1143 4141 1927 4142 4143 4144 4145 1146 3745 4146 3715 1649
95 4147 2517 1084 2137 2255 3216 4148 1031 4149 1972 1121 4150 4151 1965 4152 3542 1639 1931 4153 4154 3219 565 1666 3260 4155 4156 4157 2025 4158 1887 4159 3382 3295 1808 894 2334 2135 4160 2330
96 657 981 843 4161 2012 1533 4162 4163 2020 2724 4164 821 4165 4166 3055 15 3248
97 1107 4167 1091 1043 799 1663 3341 1101 911 4120 4114 4168 1048 4169 4075 1071 1060 1388 1116 1104 4170 3268 909 1137 1385 1808 4171 1114 1145 1053 1258 3720 2972 4158 1146 1376 1111 1126 1196 4172 4173 4174 3703 1109 4175 1426 4176 4177 1645 1136 1073 1084 1797 1133 1646 4031 4178 4179 1132 1054 1652 1712 4180 1159 2559 4181 1393 4182 4183 2231 4184 4185 1149 4186 4187 1121 4122 2330 4188 4189 4190 4191 4192 1155 4193 1128 1473 4194 1153 1090 1156 3729 4195 781 4196 4197 1115 1800 1152 1837 1051 1031 1460 1479 1429 4198 4199 13 1112 1056 4200 4201 1317 1318 1848 4202 4203 4015 4204 1148 4205 1224 1389 4206 4207 1143 1952 4208 4209 1799 4210 1659 4211 4117 918 4212 904 3136 4213 1985 1839 4214 1065 2609 4215 1391 4216 4217 1584 4218 1598 4072 3704 4219 1490 1392 4220 4221 1315 1326 1325 4222 1066 1327 4223 2226 1939 4224 3739 1064 1399 3831 4136 4134 1965 4225 1228 4226 1154 4227 4131 1971 3749
98 4228 13 4229 722 665 69 4230 3428 0 786 760 669 761 75 649 868 1551 1532 1718 87 721 858 92 93 655 1709 2765 4231 700 3121 3495 1002 820 823 3496 1682 4232 1708 89 688 4233 4234 2917 1714 3127 4235 765 4236 767 88 4237 4238 4239 769 11 1006 4240 4241 4242 4243 4244 4245
99 821 657 1445 710 1551 3168 96 674 868 4246 693 4247 3488 4248 648 4249 814 3487
100 4250 4251 1785 4077 3722 1143 1089 3278 2330 4252 1470 2154 4253 4254 1939 1601 1411 4255 1380 4256 1837 918 4257 4258 4259 1057 4133 4127 4260 1983 2033 1434 1965 1234 4261 2162 4262 1062 4072 4263 1871 4264 1938 3715 1971 4265 1976 1119 4266 4267 2026 1879 4268 2082 1471 1713 4136 2036 4155 4269 1420 2025 4270 3750 2542 2206 1122 1048 1928
101 4092 11 1540 4271 75 852 4272 4273 4274 4275 860 4276 679 4277 4101 3496 811 703 4278 2930 81 4279 4280 3083 4281 4282
102 4283 737 4164 16 4284 3167 1532 92 4285 2017 2943 721 4237 710 1628 4286 649 4287 4288 4289 4290 4291 4292 981 81 723 4293 2800 811 4294 4295 769 3651 0 2791 2835
103 1031 920 4296 1077 1939 2334 1048 4297 1984 4298 4299 910 2226 2162 1812 4300
104 3479 3557 703 3506 733 4301 4302 3625 4303 3530 729 3510 3511 3550 3512 3555 3504 4304 4092 4305 4306 652 3500 696 2826 2769 3513 3502 708 716 2835 4307 860 3514 2785 3499 4287
105 2710 652 0 760 868 82 3495 4308 13 669 722 2328 1016 1540 4309 649 69 4310 81 4311 2741 4312 817 11 4313 769 762 4314 2713 1546 2820 764 3422 2787 4315 15 4316 1006 826 827 824
106 4317 1065 2910 1208 1105 1098 1569 1072 1187 4318 1193 661 888 4319 1587 3269 780 1204 3717 4320 4321 4322 4323 4324 4325 2603 927 2701
107 3035 0 712 737 669 649 813 1532 1717 709 685 69 4326 4228 4327 4328
108 821 4329 709 1541 649 1003 2877 1549 4330 827 12 715 2643 657 666 2842 4331 2815 731 4332 3651 2014 2787 4333 2715 2791 1717 2801
109 1053 1214 1111 4 1604 1040 1057 1137 4334 1566 4335 2916 4336 4128 4337 1109 1060 1473 1567 4338 4114 2973 4339 1108 1076 1145 1136 743 799 1056 1149 1146 781 4340 3747 2025 1646 4195 1072 1423 2911 4341 3832 3743 4342 3729 1613 1426 1556 4343 3268 4344 1049 1107 2684 778 1243 1712 4345 4346 4347 13 1156 4348 4349 4350 4351 4352 4125 1074 4119 4353 4354 4205 4355 4126 4356 3726 1393 4357 3828 2618 4358 4193 4359 1075 4360 3218 4257 4361 1119 3137 2141 4362 1474 1112 2972 1653 1602 2044 4363 4364 4365 4366 4367 4216 1644 1030 4368 1715 3414 4369 4370 4371 1315 4372 1089 4373 1148 4374 1043 4197 909 1095 2617 1143 1391 4074 4178 1405 1121 1130 2259 3288 4375 894 4376 4377 904 4378 1152 1251 4379 1151 1198 2835 2466 694 649 1542 783 1446 4380 4381 4382 1682 845 4383 1234 4384 1490 4385 1610 1952 1229 1104 1928 4217 1116 4386 4134 1401 1467 4250 4387 1117 2036 4388 4221 1324 1403 3377 1399 1064 4177 4200 4389 2124 4390 4391 1439 4263 4392 1414 4393 1657 1971 1418 4394 4395 4396 1649 1383 4141 4397 4398 3740 4399 1255 3742 4400
110 1385 1109 1126 4401 4073 1111 1983 2915 4402 1054 4403 4257 4404 4405 1318 4406 1384 3705 4407 4408 4409 4410 909 3137 3542 1715 4395 4411 1132 4234 4412 4413 1952 4414 4415 4416 4335 1404 4417 4418 4419 4420 4421 4263 4422 3461 4423 1077 4124 4424 4425 4426 4427 4428 4429 4430 3742 4431 1239 4432 4433 4434 4435 2603 4209 1061 4436 4437 4438 2678 4439 2124 2047 4440 4441 1145 4377 4442 4443 2663 3746 4444 4445 4446 4447 4270 4339 1436 1224 4448 4449 4450 4451 4212 3301 1896 4452 1138 781 1142 4453 4454 4455 4456 3050 4457 1198 4458 4459 1317 4460 2410 4461 1112 903 2136 4462 1391 1430 4463 4464 4465 4466 4467 4031 2972 4468 2313 1327 1253 4469 4470 4471 4472 7 1320 4327 4473 4474 4144 1227 1926 1098 4475 4476 3459 1258 4477 4194 2026 1324 1250 4478 1590 4479 4480 1455 4352 1695 4481 1441 4482 4483 2222 1330 1073 659 2683 4484 1334 4485 1457 1240 1218 1460 1376 4486 4138 4487 2684 4488 4489 4490 4491
111 8 2637 2754 2712 1546 3426 69 0 2749 2785 11 2908 1000 666 1684 4492 769 4493 16 2794 3758 816 4494 817 2760 2967 2820 1860
112 3479 668 1717 3667 4495 1545 3326 3430 4496 96 683 688 4326 1853 826 737 2737 704
113 821 1709 4497 4498 4499 2012 668 4500 773 743 650 2179 4501 93 1547 4301 4502 739 3248 4503 3259 2897 4504 4505 4506 4507 4508 786 4509 4510 4511
114 1055 4173 1512 4385 4512 1129 1385 3839 4513 4514 1645 1053 4515 4516 1393 1152 1130 4517 1420 3288 1406 1377 4518 4519 3270 1040 1094 4103 1247 4520 4521 1660 1132 4522 3261 4523 4524 4525 4526 1656 4183 1030 1394 1378 4126 1060 4527 4528 4529 4530 4032 1149 4114 4531 4204 4532 4533 1044 4534 1134 4535 1428 1421 1045 1611 4203 4536 1392 4221 4386 4451 1479 1429 1460 779 4537 4538 4027 1424 1327 1066 4539 3301 4372 4540 1154 4541 4155 4205 3451 4542 1111 1797 2134 13 1640 1971 1401 4543 1119 781 893 3425 3742 3335 799 1138 4544 4545 1715 4220 4459 2056 4546 1436 1031 4547 1124 4548 1090 4263 4031 4549 4160 1051 2491 4338 1054 4550 1100 4551 4552 925 1101 2678 1114 4553 4554 2127 1438 1144 4555 1430 1386 4198 4388 1441 894 3542 4556 4557 1451 4355 4558 4369 1737 1391 3461 4212 4327 1598 2189 4559 4144 1785 1422 4186 4560 4561 1455 3703
115 4562 1715 1125 3266 4265 4563 1069 4564 2405 4565 4234 1426 1143 1590 4566 1380 4567 1092 4568 1170 3828 1983 4569 4570 1387 4250 4571 1122 4572 4335 3262 1410 4573 1134
116 4574 4575 3088 1542 2836 690 4576 2846 657 1000 1628 96 4577 1 2181 3495 4578 11 2176 4579 4580 4581 814 2643 4582 4583 4584 1006 4585 3390
117 69 3428 760 657 868 1682 93 1598 7 1399 13 1056 660 1064 1054 1146
118 821 1540 2820 657 817 11 649 827 1549 824 92 81 2734 703 0 2720 1548
119 69 1529 845 817 3422 709 4586 981 819 4587 813 2714 2737 4588 698 1683 825 3283 2017 1684 2750 8 4589 653 4590 1718 1015 4511 4591 4592 4593 4594 376 4595 4596 144 4597 4598 4599 4600
120 1064 1564 1380 3713 4073 1135 1238 4601 3710 3734 2110 1000 4602 4603 4024 868 1428 4604 1586 4544 1422 4605 4606 3730 4607 11 688 4608 3732 4609 4610 4611 4612 4613 1186 3542 4614 1590 929 3735 3714 1581 4615 13 4616 1442 4187 1928 4617 4618 4619 4620 4621 1315 4622 4623 4624 1214 4625 4626 2096 4627 4628 4181 4629 4630 4631 4632 1162 4368 1202 1097 4633 1111 4634 4635 4636 4637 4638 4639 4640 4641 4642 4188 4643 4644 4645 4646 4647 4648 4649 4650 4651 4652 4653 4654 4655
121 694 1545 813 1544 92 783 4656 2713 2926 1002 4657 1716 4301 2720 3332 657
122 1134 4464 1481 1503 4658 4659 4660 4661 4662 4663 4664 4665 4666 4667 4668 4327 4669 4670
123 1310 597 616 569 829 558 4671 1678 834 594 554 562 1313 4150 595 4672 582 586 1681 612 2921 574 838 4673 4674 611 614 601 4675 4676 1672 4677 986 1665 575 4678 840 4679 598 4680 4681 613 4682 4683 4684 2919 4685 565 4686 4687 4688 4689 1669 3468 606 4690 3476 587 580 1664 995 623 4691 573 4692 4693 561 4694 4695 987 568 992 4696 4697 571 4698 572 4699
124 565 1008 2976 95 821 4700 4701 4702 480 4703 3194 4704 2759 4705 0 2637 1710 710 2709 4706 4707 1905 3704 4708 1783 1355 2729 685 4709 1541 2737 3074 4710 2706 4711 4590 811 4712 3123 4459 4713 4714 4715 4716 4717 4718 4719 4720 4721 4722 436 1666 4723 4724 4725 529 814 4726 4727 2823 4728 4729 4730
125 1046 891 1558 780 1042 2927 0 4731 81 999 827 4732 1530 11 1716 1628 1006 2134 4733 1505 4734
126 4735 4736 211 394 2992 4737 503 360 4738 4739 98 4740 4741 445 149 4742 4743 4744 4745 4746 4747 4748 49 4749 508 4750 4751 4752 4753 100 160 257 4754 3040 4755 4756 2988 4757 4758 4759 458 4760 363 2994 264 455 4761 4762 210 4763 304 540 4764 2990 142 61 240
127 1443 11 1709 4765 4766 3972 3905 4767 4768 3174 4769 4770 4771 4772 4773 4774 4775 4776 4777 4778 4779 4780 4781 3171 4782 3870 862 4783 883 4784 4785 4786 4787 4788 1684 4789 4790 4791 3626 4792 4793 4794 4795
128 807 770 80 2179 1684 813 1717 826 2714 760 2794 1719 2734 2720 87 762 1534 2787 2741 2800 2764
129 4796 767 685 88 811 981 4797 69 3280 4798 3513 4799 743 4800 4801 4802 738 4803 4804 3074
130 4805 19 436 457 4806 4807 4808 4809 111 2988 353 114 33 51 164 203 300 4810 315 4811 2980 39 4812 4813 4814 4815 4816 4817 4818 42 4819 167 4820 4821 4822 4823 4824 25 529 41 4825 4826 4827 4828 4829 4830 121 4831 4832 4833 423 4834 440 4835 4836 124 4837 4838 4839 4840 357 335 157 120 103 4841 204 145 4842
131 4843 4844 4845 573 582 4728 4846 4698 4847 4848 4849 841 4850 4851 4852 562 990 4853 4854 597 4855 4856 4857 576 1676 2923 591 2921 1313 4858 1681 1666 4672 570 4676
132 738 686 669 820 765 87 2711 3430 1443 1545 817 1535 2770 2720 981 709 2179 2785 731 1532 2947 11 650 649 8 2719 654 786 4859 82 730 2760 2014 783 1682 1006 813 1685 4860 3129 4861 769 648 2734 1826 4862 827 657 2797
133 69 738 657 2765 827 3422 4863 1716 4864 816 2735 3484 1542 81 2877 4656 783 2014 4332 4865 2742 4791 2767 1538 4231 654 709 2638 4589 813 2179 3594 760 3248 2013 4331 4311 2017 2763 4866 1541 3083
134 1136 1377 1518 1134 4158 2025 1053 4114 1090 781 1040 1060 1422 1426 1056 4867 1570 4868 4608 4569 904 4869 4870 1239 1393 1482 3831 1170 4871 799 4544 1413 1109 2911 2914 1451 2199 1561 4630 1151 4872 4873 4874 4875 1715 1459 909 4376 803 4459 4876 4877 4878 2462 1604 4550 1330 1101 1075
135 1112 1066 1406 1060 4484 1712 4879 1421 4334 779 4880 2335 4435 1076 4881 4882 4182 893 4883 4884 199 4820 19 1044 4885 114 4886 1512 1113 1141 910 1114 1621 4395 3266 1045 1043 4887 660 1785 4888 1091 1148 4206 4889 1104 4465 4126 1201 803 4517 2916 1061 1428 1105 1145 1087 2684 1439 4890 1251 1422 4891 1420 4892 4893 1139 1128
136 656 4894 4237 690 676 3759 3503 724 2882 1540 11 4895 4307 1002 3280 2830 2714 4896 3307 1005 703 842 4897 2965 1548 4898 2772 1006 3593 80 2741 4899 3241 3583 768 4900 2874 4901 8 696 3482 3584 4902 2794 1446 4903 823 3663 3525 4904 3304 4905 719 735 4906 3556 4907 743 4908 4271 852 693 4909 4910 4911 2814 3493 3499 79 4912 3588 713 1444 1530 4913 2746 4914 3591 772 4915 4916 4917 853 4111 4918 4589 1684 3603 2801 4919 3574 4920 4921 4922 3502 4923 2904 2020 3248 2835 4924 3317 783 4925 3613 714 3429 4926 3647 4927 4928 4929 1628 3680 3761 3512 4930 4931 4932 3779 4933 2786 2641 4934 4935 4936 3636 4937 4938 3802 3771 4939 4940 4941 3811 4942 4943 4944 3677 3799 4945 4946 4947 4948 4949 4950 4951 4952 4953 4954 3770 4955 4956 695 4957 4958 4959 4960 4961 4962 4963 716 4964 4965 4966 4967 4968 4969 4970 4971 4972 4973 4974 4975 4976 4977
137 3418 4978 4101 4979 87 4911 4980 843 761 821 685 768 823 827 3489 765 655 1709 4238 1541 4981 3483
138 4053 3394 4982 953 4044 4039 951 4983 4047 4041 4984 4985 4986 4987 4988 4989
139 1549 4990 812 2713 2820 1545 11 1716 2711 654 760 764 2019 710 1682 665 817 4711 4230 3489 3760 4991 1532 868 2014 81 769 2748 981 0 2012 4992 82 2902 814 3426
140 649 1619 4406 783 764 827 824 4993 4994 657 2179 1000 4995 2775 1016 4996 2784 8 3600 786 1025 17 771 12 2902 2897 773 4997 3577 760 4998 3045 4999
141 2965 650 4796 5000 1443 5001 3541 2737 2720 5002 1002 5003 5004 4904 824 1001 743
142 3749 1136 1561 1254 2974 4202 4630 1604 1887 5005 4218 4433 5006 4283 2973 5007 4619 1130 3285 1804 4455 5008
143 3667 5009 2826 4280 5010 2882 4939 852 710 1709 5011 5012 5013 746 4685 3206 2650 765 5014 3643 5015 2022 5016 704 773 2767 15 2891 5017 5018 3647 0 2748 1826 5019 3167 5020 4331 703 5021 693 5022 5023 5024 5025 3629 3651 674 5026 2791 5027 5028 5029 5030 5031 4557 5032 5033
144 736 716 3515 4110 786 3511 11 5034 2829 5035 5036 5037 696 2825 5038 5039 5040 3167 653 5041 2720 5042 3488 2830 5043 5044 3592 5045 844 668 5046 5047 4092 5048 5049 5050 846 5051 3563 5052 5053 5054 5055 1540 4791 5056 3063 2836 5057 3613 5058 5014 766 5059 2835 5060 3632 3529 5061 3686 3647 2801 5062 5063 3291 3605 4787 5064 5065 690 5066 2870 3618 5067 3595 5068 3506 3678 4938 5069 5070 5071 4705 3649 710 3573
145 3493 649 93 1717 1937 1707 701 708 786 5072 3760 3758 2735 0 2636 669 710 69 3430 4244 87 2814 3593 5073 2741 2904 1935 2767 3508 3069 1003 5074 704 3575
146 1386 1075 1837 1243 5075 1512 5076 5077 1426 5078 5079 4178 5080 1577 1089 1894 3826 5081 5082 5083 5084 4567 3750 5085 5086 5087 4072 5088 4120 13 5089 5090 5091 5092 5093 1156 5094 4544 1983 4426 888 4487 5095 4517 4211 1715 5096 1198 1586 3288 5097 5098 1109 4353 5099 1405 1411 5100 3733 2497 1150 2141 5101 1408 1383 1379 4212 4145 1152 4610 4873 1378 5102 1213 1928 1239 5103 4881 5104 1119 5105 3340 4459 5106 5107 5108 1841 4361 5109 1429 5110 3285 4521 2320 2911 4204 2147 5111 4114 4130 1043 5112 1030 5113 5114 1381 2053 5115 5116 1056 1977 5117 5118 5119 5120 1926 5121 2595 5122 5123 5124 4219 5125 5126 1140 1142 5127 5128 1255 1055 5129 1394 1202 4434 5130 2259 5131 1385 5132 5133 1955 5134 5135 4122 1574 1087 3455 1393 1066 1044 1965 5136 5137 1122 1409 5138 1145 4160 2933 4359 5139 781 5140 5141 1166 1833 4257 4466 5142 3265 5143 1562 3449 5144 1575 4427
147 3600 3495 683 1543 760 82 1718 1682 826 93 1853 75 84 814 0 4586 5145 769
148 1042 1331 1046 737 2012 1019 5146 760 653 785 4981 5147 5148 5149 710 845 5150 2706 4862 665 69 8 0 1711 774 649 82 1532 15 1718 87 688 93 2765 2714 767 786 5151 5152 5153 768 813 4994 4310 868 4501 5154 814 5155 5156 2803 5157 5158 2750 5159 2815 2742 676 3045 3259 852 704
149 608 4673 5160 5161 5162 560 5163 566 5164 557 5165 5166 5167 558 5168 5169 5170
150 3504 653 3573 5171 2796 15 3699 5172 5173 790 5174 5175 5176 5177 5178 5179 5180 5181 5182
151 931 935 4053 5183 4039 938 5184 947 3405 3394 953 3402 5185 4056 827 2765 2904 817 2638 934 943 4052
152 1548 5186 2714 5187 696 654 1545 851 5040 92 85 824 2769 3282 4078 5188 1543 5189 2925 4380
153 4094 1546 11 1548 1064 5190 1075 5191 712 760 669 1530 93 684 5192 4068 821 2637 4237 3274 676 1062 1645 5193 1180 1133 5194 4522 5195 5196 4612 4209 5197 5198 5199 1089 4195 1602 1072 5200 5201 3839 5202 1070 5203 2611 5204 2822 5205 1818 1192 1715 1195 2380 3823 5100 1161 2044 807 649 5206 781 5207 2820 1442 1030 5208 1046 5209 1558 1537 1443 1540 4656 2713 1550 2720 5210 650 762 1685 2874 694 827 1532 92 1660 1031 5211 1057 5212 1040 1043 3741 4036 4543 5213 919 5214 5215 5216 1512 4021 5217 4482 3742 1611 1415 1389 4182 2618 2328 1392 1084 1117 1198 4383 2378 1391 5218 2910 5219 5220 4250 3834 904 4221 5221 1399 1073 1146 4117 5222 1157 1979 1971 4378 4114 799 1428 3749 3268 1439 1104 5223 1052 5224 4892 1255 3750 1383 1056 5225 2199 13 783 3745 4076 3748 4128 661 5226 1327 2678 1000 1594 696 1006 2741 5227 914 769 1518 5228
154 5229 703 783 5230 5231 2794 710 2710 4301 663 3512 5232 4910 733 5233 3614 3601 5234 3592 696 3613 811 5235 3291
155 1026 5236 4610 5237 1080 1622 5238 1089 950 5239 5240 868 4135 4337 3266 1156 5241 4899 4244 5242 2933 5243
156 821 657 2707 981 5244 3584 5245 3430 3508 722 1707 710 3489 2909 5246 715 5247 5248 5249 5250 5251 5252
157 1652 1423 1145 4335 1109 3703 1393 1604 4463 5253 4183 1211 1143 5254 1134 1518 4207 1137 5255 1113 4447 4628 4343 1377 4350 4138 4484 5256 4425 1239 909 1071 5257 1376 5258 1693
158 5259 5260 4039 5261 949 3401 3404 2 937 3409 5262 5263 5264 3395 5265 4267 1190 5266 3287 1065
159 2724 652 5235 5267 654 4900 1005 3281 655 4492 5268 2835 4935 1551 5269 2707 5037 2881 5270 2842 4382 786 4274 3765 5271 5272 5273 5274 3077 5275 5276 3665 5277 5278 2832 4904 5279 3764 5280 5281 5282 5283 5284 5058 5285 2853 5286 2869
160 838 985 576 5287 560 2924 3476 1670 577 1275 5288 614 835 1267 589 578 5289 5290 5291 4843 587 5292 5293 608 5294 5295 5296 5297 5298 5299 580 5300 5301 5302 5303 984 1273 5304 607 5305 5306 5307 5308 5309 5310 5311 5312 5313 5314 5315 5316 5317
161 1065 1457 5318 1621 1983 5319 5320 3568 5321 2846 5322 5323 5324 5325 5326 668 5327 5328
162 652 1541 821 5329 657 653 852 5330 5331 5332 5333 5334 5335 3354 5336 5337 5338 4332 5339 5340
163 935 940 1709 5341 4956 5342 5343 5344 5345 2775 3808 5346 5347 5348 2946 5349 855 5350 5351 88 5352 5353 3667 693
164 3493 3423 724 2964 3651 2179 3678 3773 5354 726 5355 5356 3647 5357 762 3291
165 737 5358 2930 722 2017 4164 5359 979 4586 3129 826 657 5360 981 81 773 4585 5361
166 4435 1393 1593 799 1470 5362 4335 1639 5363 4403 1126 1121 2974 5364 1383 1318 1404 2972 1317 1114 2933 1714 1156 1143
167 0 82 1529 813 1534 1717 1193 2636 1548 1001 5365 2745 93 769 2754 1540 2760 5366 5367 300 270 240 5368 5369 788 2726 2017 772 2711 5370
168 3304 5371 1708 5372 5373 5374 844 5375 5376 1245 4653 13 5377 5378 5379 5380 3317 4904 5381 5382 4091 4907 5383 768 4502 5384 5385 5386 5387 5388 5389 5390 5391 5392 5393 5394 3061 697 5395 5396 5397 4510 5398 5399 3607 5400 4303 5401
169 646 3110 759 5402 1757 5403 5404 1284 977 967 5405 629 973 5406 2673 635 5407 5408 3125 5409 5410 5411 5412 1286 5413 1781 5414 1782 966 3095 3096 5415 5416 1723 3331 3328 1351 5417 5418 5419 5420 5421 5422 1742 3097 5423 5424 5425 5426 5427 1299 1345 5428 5429 1309 5430 1736 5431 5432 5433 5434 5435 5436 5437 5438 5439 5440 1359 3124 5441 640 5442 5443 1366 669 649 1283 5444 5445 1367 5446 1302 5447 630 978 5448 3107 1794 1368 5449 5450
170 5451 5452 3374 5453 2666 911 4399 4222 5454 1189 4408 1696 2110 1202 5455 5456 2141 5457 2436 5458 5459
171 3332 783 0 696 81 648 814 817 2637 2179 2908 3045 2636 3244 1000 2967 1860 11 1682 824 2745 760
172 1556 5460 3750 5461 5462 1848 1892 4205 1983 2684 4513 4027 1448 1084 2160 1422 5463 1221 5464 4031 1065 5465 1187 1045 1034 5466 5467 3294 1111 1057 1887 2916 1103 1056 1256 2199 1108 1923 1073 1105 1048 2009 1036 5468 1386 5469 2422 5470 1956 1212 1203 5471 5472 1114 1158 5473 2678 4015 5474 5475 2239 1979 5476 3218 5477 5478 5479 5480 5481 5482 5483 5484 1903 4320 2699 1110 5485 5486 5487
173 648 5488 77 2835 5489 703 2179 666 3625 694 2713 3515 2729 3421 657 844 811 2885 3281 696 1015 690 724 3051 3519 2884 4492 5490 3545 5491 1443 1545 692 2720 2964 722 5230 80 656 684 4092 3426 821 760 5492 2825 850 1685 3045 1005 3428 2775 5493 5494 3544 5495 3503 798 5496 2892 8 4899 3538 5497 2963 4864 824 1002 2866 5371 5498 3500 5499 5500 2640 5056 5501 852 710 5502 3083 2947 4577 851 3497 2768 4237 5503 2830 5504 4910 3493 5350 3574 3504 5036 3501 4278 4111 711 1016 677 681 5188 857 699 2731 1006 5505 5506 4656 2900 4921 5507 5045 653 5508 2176 1000 5509 701 2842 733 2908 2896 5510 1550 842 2020 4859 3530 3523 2736
174 1639 1118 1214 1109 4535 1191 2330 2281 4137 1046 4145 5204 5511 5512 781 5513 4176 4515 5463 2199 5514 5515 1455 1472 1922
175 1410 1335 4347 1470 5516 1983 5193 4465 661 5517 5518 1202 5364 3749 1564 2147 1030 1577 1254 1054 4103 4339 1187 1076 1473 1089 1318 1657 1119 1195 5519 1052 4209 3268 1316 1201 1128 1117 1158 1098 4120 4544 5520 5091 1431 2053 781 1381 1062 1064 1380 1074 1593 5521 3448 907 5522 1557 4348 1033 5523 1105 5524 4192 4463 5525 4172 5526 1143 1091 1043 4265 5527 1060 1056 4335 3267 5528 1086 5529 4412 5530 4193 5531 1046 1615 1127 1085 5532 5079 4318 1139 1102 3278 4540 3336 5117 1230 1121 3287 5533 3266 4168 5534 4631 1518 1567 3823 778 1622 5535 5536 5106 5537 1044 4399 1059 1848 1613 1426 1833 1124 1111 4355 1203 1095 4211 5538 660 3338 5539 1928 13 3425 5540 3295 2603 5541 4569 1411 3050 5542 5543 893 1104 1373 1107 4459 1191 4881 1159 5544 4611 1087 1149 1604 1189 1106 5362 5545 4358 5546 5547 5548 1072 1614 1051 4621
176 5549 39 114 164 157 103 4830 5550 4806 5551 5552 154 314 5553 4815 121 5554 5555 5556 5557 5558 5559 139
177 3271 5560 1566 4490 4318 1076 4570 1335 5238 5193 5134 5539 1721 1170 1207 893 894 4018 1122 1567 1611 4347 5561 1596 5562 780 781 5563 1195 1622 5564 1921 1064 5565 1565 2333 3823 3715 5566 1586 4463 1070 4028 4258 5567 5568 4216 1202 1089 1127 4459 4320 1574 1614 3340 5524 1562 1098 1065 1072 5569 1066 1059 1252 4172 1158 1620 5526 5570 2609 5571 3285 1564 5572 5573 5205 5520 5574 5575 1797 1117 5576 4516 1580 1128 5577 1615 5532 5578 1612 4417 1083 5579 1569 5540 1077 2405 3275 2127 4612 3278 4540 1052 5580 5079 2380 4024 5528 5581 3272 3267 5530 5582 1085 4420 5583 1209 4209 2082 1115 4193 5584 1080 1570 2053 5585 5586 5203 5077 1042 3266 5587 5588 4546 1183 5589 3050 3751 5590 1467 4125 4521 5591 5198 1578 4211 1119 2911 1218 4567 4393 1084 1030 2025 5592 5593 2147 1043 1165 2462 3295 5594 5595 1090 1040 3738 5596 5597 3425 5598 1409 4423 1099 5599 1056 5600 1104 5601 5602 1203 1121 5603 888 5604 1785 920 5204 5605 2969 5606 1559 1651 3372 5607 5362 4530 2096 1639 5608 1961 1148 4032 5609 5610 1106 5545 1831 5611 2382 5612 1132 5547 5613 2154 1928 1967 1062 5614 5615 5616 4207 1715 5130 5617 5618 5619 3262 4413 5215 5620 3334 1088 1594 4178 7 779 1086 4514 1130 2137 4021 5621 1942 1068 5622 3542 5623 2124 5624 799 5548 1407 4614 4531 1994 5625 5534 1993 5626 1234 5627 5206 4154 5628 5629 5630 5631 4404 4401 4255 1897 897 1093 5632 1598 5633 5634 5635 1193 4613 1118 5636 5637 4 1693 5638 5639 1423 1143 1125 4169 1176 1603 1057 4526 1659 1621 1552 1637 4603 1071 1060 5640 1184 5641 5642 5643 2037 1645 4194 925 1111 4350 1100 1156 5453 1061 803 1063 1221 5644 5645 5646 1224 4882
178 3555 5647 5648 703 729 5649 5650 691 3614 5651 4939 5652 5653 5654 5655 3539 5656 2826 5657 5658 4078 5659 5660 5661
179 1446 693 5046 4930 3304 5662 1001 2852 844 5663 5488 5001 4904 5664 5665 5666 5667 3314 5668 3129 5669 847 5000 768 5670 5671 2958 1545 5672 5188 5673 5674 5675 5676 5049 5677 2720 2866 2847 5678 5679 859 5680 5681 4900 5682 842 5683 5684 805 3488 3420 5685 88 5490 4790 3421 3578 5686 1005 3583 696 1711 1540 93 5687 5688 5689 2735 697 5690 2707 5498 4101 1853 843 3526 5691 5692 669 2880 5506 845 89 4274 5037 1024 5693 5342 4241 786 3579 684 3500 5694 5695 5696 653 5697 5698 736 5699 5700 5701 815 5271 767 5702 3307 5703 3480 5704 1547 5705 5706 3321 3558 3522 5040 760 649 0 823 4293 85 4083 5707 5708 4935 5709 5710 5711 5712 3550 5713 5714 5715 2951 69 2885 3282 855 5716 5717 681 91 1709 3310 5718 5719 3248 5720 5721 5722 5372 5723 5268 3667 4796 5724 4285 5725 5726 5727 1710 3284 5728 3054 1707 708 5729 3063 3311 5730 4577 4949
180 5731 1075 5732 1639 5733 5734 5735 5736 1196 5737 5738 4172 1876 5477 4160 4205 1212 1814 5739 5740 5741 5742 5595 5743 5744 5630 5745 5746 5747 5748 4514 1084 5749 1090 4544 3275 5750 5751 1962 1568 5752 5110 5753 2487 5754 5755 5452 2066 5756 5757 3273 5758 2120 5759 5604 5760 5761 2491 1887 929 5762 2218 1042 7 5763 3137 3266 5764 3344 2137 3295 5765 1558 2243 2044 802 5766 2165 2683 5767 5768 2186 5769 5770 1689 5771 4374 5772 4360 1214 1091 5773 5774 5775 3374 5776 5777 1896 3339 5629 5778 5511 3236 5779 5780 1869 5781 5782 4554 5783 1407 1688 4372 5784 5785 5786 5787 3342 5788 5789 5790 2334 5791 1831 4183
181 3503 737 809 5673 5669 5792 696 5793 5794 2852 2835 5795 4293 2885 77 5796 3578 805 5797 1717 3518 70 5798 5799 5667 5800 5801
182 1051 2025 1057 3729 1149 1143 5802 1983 4113 1176 4435 1043 1805 5803 1048 3832 1426 1111 4396 1848 2259 1219 1121 4122 4252 1688 5804 3269 5805 1613 1977 3453 1185 5806 1601 781 4533 5203 4612 1076 1567 1611 2330 4112 929 5807 1198 1155 1085 5808 1737 1182 1108 3715 1084 2137 5809 1228 1183 1843 4077 4131 5548 4121 8 1446 4297 2542 1961 2156 5600 4613 5109 4372 3278 4540 4354 5810 3454 1939 5546 1995 2158 5142 2131 2154 3338 4570 1107 1075 5811 2969 1373 1030 2465 3260 5812 1166 5813 5814 4611 5815 1875 1089 1999 5816 2071 5817 1095 1833 4524 1380 1040 5818 2134 1056 5819 4118 4535 3336 1917 5820 1139 1407 5821 5822 5823 1229 1510 1112 3262 5824 5825 1073 1122 1130 5826 1378 1987 5827 4265 1453 1109 4227 1134 1077 3742 1445 2014 5828 5829 5727 5830 2033 1985 5831 4158 1253 4141 5832 5755 4114 1393 4384 4327 1455 3702 5833 4132 2127 1174 4144 5609 5834 5835 1837 2063 5134 4268 4137 927 4443 5836 5837 5838 1330 5839
183 2846 5794 3054 4897 3513 4304 5840 5841 5488 5673 5842 4979 5843 3614 5844 5845 4994 5648
184 4304 5846 5847 5841 2840 5848 4981 5849 1837 5850 81 5851 5852 5853 5854 5842 5855 5856 2764 4921 846 5857 5858 5859 2872 5860 5861 5862 5863 5864 5865 5866 5867 5868
185 2765 657 709 3760 1541 5869 764 5870 2964 4859 654 11 1002 1716 87 5871 1548 12 93 2927 3045 2902 786 1025 15 2784 3490 648 1540 3245 772 2014 5247 715 5872 1992 5226 5228 13 5873 2548 4546 4488 2293 2199 1602 675 802 5874 5020
186 4307 696 4711 2964 3625 2962 733 5875 2925 3483 2179 762 3284 5876 4304 2742
187 783 1545 5877 4065 5878 5879 5880 5881 626 758 5882 5883 5884 5885 5886 5887 5888 3302 5889 4720 1717 5890 5891 5892 5893 5894 5895 5896 5897 5898 5899 4070 3206 5900 5901 4781 2646 5902 5903 5904
188 1716 1024 2720 2737 2749 827 2643 16 1538 11 3488 650 2740 783 654 1000 3701 764 807 2773 2638 1534 760 788 769 2785 5905 655 2751 765 999 93 2746 5906 1015 2726
189 2134 4244 3045 1030 5907 13 4287 1443 737 1538 763 69 4246 3492 3607 786 5001 5908 868 3543 3277
190 1712 4395 1053 3703 3743 5909 1604 2491 5910 1637 1413 4560 1196 812 4326 5911 5692 5912 5913 4502
191 334 204 318 5914 41 407 4834 5915 4830 5916 227 5917 353 4806 5918 4820 5919 5920 5921 5922 119 5923 5924 39 5925 5926 5927 5928 271 5929 5930 23 4883 4837 476 4833 181 436 147 5931 475 4828 5932 5933 5934 5935 5936 5937 5938 5939 5940 4816 238 199 5941 202 5942 5943 4823 5944 164 5945 5946 159 5947 5948 4818 203 5949 5950 5951 468 4597 209 5952 5953 5954 4826 5955 5956 4819 243 5957 4811 5958 4832 311 64 5959 5960 5961 144 457 4822 5962 150 5963 5964 4817 5549 5965 5966 5967 162 5968 5555 307 5969 5970 5971 4841 5972 5973 5974 5975 4825 5976 5977 5978 5979 398 5980 5981 4812 5982 5983 5984 440 5985 33 5986 5987 5988 5989 266 315 5990 5991 3001 5992 5993 382 219 5994 5995 5996 4752 5997 4821 308 5998 299 177 5999 6000 6001 230 427 6002 512 6003 6004 3000 6005 506 6006 461 6007 6008 6009 6010 425 6011 6012 418 328 6013
192 3478 1541 6014 2765 669 2714 698 2638 3275 652 703 5354 6015 6016 6017 5273 4492 6018
193 4492 6019 2651 3624 1541 2731 6020 4078 2732 744 749 2649 3215 6021 2650 16 694 1716 1685 1445 981 1548 3538 94 6022 6023 6024 4557
194 6014 5069 6025 3759 6026 5355 2836 2886 6027 4274 2866 692 3505 6028 4303 6029 2801 6030 715 5286 6031 3606 2732 3788 842 6032 6033 857 2821 6034 3628 798 3305 2849 5842 2852 677 3805 1444 2803 3518 6035 3793 6036 3667 6037 6038 2786 848 773 2835 6039 6040 6041 4492 5505 5354 6042 2880 2865 6043 6044 6045 6046 6047 6048 6049 1018 6050 6051 3300 5683 5009 6052 6053 710 2170 3312 6054 5328 3656 6055 6056 2853 4934 6057 6058 6059 6060 2863 846 6061 6062 2858 3603 6063
195 2747 8 649 4580 1538 1539 3645 1549 654 827 1716 765 868 1005 2096 1053 2134 3425 1569 1049 1089
196 6064 992 828 566 6065 4847 1312 4688 568 605 6066 836 572 598 582 4681 1666 1310 1669 6067 994 586
197 4336 4633 1317 909 6068 6069 6070 6071 6072 6073 6074 6075 6076 6077 1108 6078 6079 1142 1490 5602 6080 1325 6081 4388 6082 6083 6084 5628 6085 4649 1423 1406 6086 5257 4868 6087 6088 6089 6090 6091 6092 1441 6093 6094 6095 6096 4548 4608 6097 1644 4641 6098 6099 6100 6101 6102 6103 6104 6105 5126 1066 6106 6107 6108 3167 4585 6109 6110 6111 6112 6113 6114 3735 6115 6116 6117 6118
198 737 2637 3280 820 657 3167 1718 714 2749 1541 730 1711 8 1707 2737 1682 2179 6119 674 6120 710 4585 2874 96 6121 1826 6122 868 814 2012 786 3256 2941 4332 1445
199 6123 6124 6125 5009 4928 4907 6126 5016 3613 6127 3629 6128 3583 6129 6130 2897 6131 6132
200 648 657 4092 3482 3277 1530 649 827 845 1853 3281 1001 6133 11 3760 8 2765 3244 69 786 1717 3280 1445 3129 847 669 653 6134 1024 1000 3489 6135 710 1549 88 5724 3083 6136 6137 3167 4241 6138 5341 824 1005 6139 2834 3069 5510 4994 6140 6141 1541 16 3544 4310 81 700 6142 685 1716 5351 6143 6144 1066 1029 6145 6146 6147 6023 3565 3350 96 1011 6148 4237 6149 4497 5727 6150 4586 93 2014 6151 1940 2715 5020 75 1682 1852 1614 3355 3784 654 6152 6153 82 6154 2968 690 6155
201 4164 4992 1540 1000 4656 2713 657 1853 11 981 827 654 712 4301 4860 2956 2719 731 3487 2737 711 3256 810 81 709 92 4230 786 6156 2711 2717 737 2814 1541 2967 649 783 1006 3535 673 1718 2785 8 2726 710 762 6157 3488 4991 3497 1717
202 1030 3760 648 657 769 860 5687 6158 3524 1937 6159 668 979 3291 710 4164 1540 821 3507 1852 1853 691 6160 2964 981 3606 3133
203 632 4458 6161 4216 4346 6162 5191 660 6163 6164 3413 1176 1195 2218 1832 5468 3416 6165 1084 3139 6166 6103 6167 3347 3752 1327 3050 6168 6169 5593 6170 5215 6082 6171 5471 1661 1170 3713 6172 1621 5619 6173 1134 6174 5910 6175 5117 6176 1979 1125 6177 1640 1122 6178 1128 4270 6179 6180 4873 1119 6181 6182 4182 5517 5465 6183 5545 6184 696 2227 6185 2222 1438 6186 2199 1435 2702 4403 1115 4036 6187 1663 5539 1034 1455 1624 1058 2916 6188
204 1316 1043 1156 1616 1084 4190 3414 6189 6190 1567 4179 4201 1611 1581 5564 6191 5752 6192 6193 1121 5753 4122 4613 5209 4612 5620 4604 1565 6194 4097 3286 1604 1583 1155 6195 1737 1713 6196 1154 1820 807 1707 674 3430 694 1711 760 0 4910 1000 729
205 1540 743 87 88 1853 674 6197 681 2947 5504 80 3489 688 683 1551 814 4101 3645 737 1005 4899 783 1709 4332 768 813 709 670 75 3483 694 4248 3518 6198 1718 707 16 8 672 710 6199 1536 5906 3077 6200 6201 6202 2737 767 3167 0 1707 6203 704 2959
206 2724 0 2734 8 1545 1716 11 827 3538 2638 1684 1628 654 2720 2749 17 771 2756 1626 1548 2737
207 6204 3450 1397 4517 1835 4177 6205 6206 4203 1247 6207 4408 6208 1808 1154 6209 710 3045 2160 3720 4264 3740 6210 4252 1062 6211 4871 4465 1804 1939 6212 6213 2127 6214 6215 6216 1121 5819 4527 4530 1828 4633 4476 6190 4538 4108 6180 6217 6218 1837 1841 3735 5116 6219 6220 6221 2671 5228 5257 1977 6222 1985 1926 3702 6223 6224 6225 1473 1406 6226 4350 3459 3748 4120 6227 1490 6228 3268 6229 2443 6230 6231 6232 1486 1412 1226 6233 1588 3137 6234 1579 6235 1591 2138 6236 6237 1193 6238 2025 6239 909 1383 6240 1176 6241 4259 1441 1376 1459 6242 6243 6244 2684 6192 6245 5202 6097 6246 6247 1800 3831 6248 3218 1586 4348 900 6249 6250 6251
208 783 981 820 762 1717 4501 737 768 709 814 6252 4589 3495 674 2635 11 663 1445 1682 6253 6254 0 69 2735 669 657 2767 3277 82 4863 6197 4711 2753 1685
209 3614 6255 1446 3083 3663 3515 5400 3556 5354 805 3756 3755 5244 1152 4306 3762 3291 6256 6257 5055 6258 6202 3304 2866 5670 4091 2842 5666 2825 5680 844 3649
210 4399 4209 1721 6259 6215 6260 5785 6261 6262 6263 6264 6265 661 1043 5750 1202 1129 5811 6266 6267
211 1940 3483 5187 5688 3083 5493 6268 4237 3585 762 1541 6269 6270 703 4271 6271 1718 2845 5063 3284 1826
212 2963 4380 5053 5045 3281 1707 6272 1685 6273 6274 6275 5231 5723 6276 2813 813 6277 672 2731 743 3538 6278 729 6279
213 6280 6281 6282 6283 6284 6285 6286 6287 5881 6288 6289 1062 13 6290 2508 1089 1715 4102 6291 1090 659 1049 1045 1952 6292 6293 6294 6295 6296 6297 6298 6299 6300 6301 6302 6303 6304 6305 1084 6306 3048 6307 4193 891 6308 893 6309 6310 6311 6312 626 754 956 5885 6313 6314 6315 3206 3210 6316 6317 6318 6319 6320 6321 4795 6322 6323 6324 6325 3179 6326 4777 6327 883 5883 6328 6329 6330 6331 6332 624 6333 6334 6335 6336 973 1351 6337 1306 6338 6339 6340 6341 6342 6343 6344 3447 6345 6346 6347 6348 6349 6350 6351 6352 6353 6354 6355 6356 6357 6358 6359 6360 6361 6362 6363 6364 5894 6365 6366 6367 6368 6369 6370 6371 4685 6372 6373 6374 6375 6376 6377 6378 6379 6380
214 4501 683 4337 2727 6381 8 681 4257 6382 4178 1209 1661 6383 6384 693 6385 688 2255 894 1044 5734 4102 4360 2333 6223 1091 4091 1711 768 6134 843 2892 2774 6386 5222 3741 6387 6388 1702 2466 2093 1412 2106 5818 6389 6390 1030 2629 3413 6391 2320 6392 1526 6393 6394 2260 6395 6396 6397 6398 6399 6400 6401 1156 6402 2482 1259 1518 6403 1847 6404 4654 6405 6406 6407 1509 6408 6409 6410 6411 6412 6413 6414 6415 1144 6416 6417 2172 6418 6419 6420 6421 6422 6423 6424 1918 6425 6426 6427 6194 6428 6429 6430 6431 6432 6433 6434 6435 6436 1104 6437 6438 4457 4175 6439 6440 6441 6442 1146 6443 6444 6445 2916 6446 4610 6447 6448 6449 6450 3724 6451 6452 6453 6454 2109 2224 2295 6455 6456 6457 4181 6458 6459 5808 6460 5572 6461 6462 6463 6464 6465 6466 6467 6468 6469 6470 6471 6472 6473 6474 6475 1053 3295 6192 3735 6476 6477 2632 6478 1426 6479 6480 4343 2082 6481 6482 6483 6484 6485 6486 6211 6487 6488 6489 3828 6490 6491 6492 6493 6494 6495 6496 6497 6498 6499 6500 6501 6502 1026 2618 6503 6504 2147 1504 6505 6506 6507 4651 4392 2972 6508 6509 1240 6510 6511 6512 4449 6077 6513 4461 6514 6515 6516 6517 6518 6519 1189 6520 4415 1143 6521 1898 6522 6523 6524 6525 6526 6527 6528 6529 6530 6531 6532 6533 6534 6535 6536 6537 1642 4098 1066 6538 6539 6540 6541 6542 5258 1474 6543 6544 6545 6546 1463 6547 6548 6549 6550 6551 6552 6553 6554 4635 6555 6556 6557 6558 6559 6560 6561 1397
215 4459 1083 4366 6108 6562 4370 6563 4167 902 1073 1898 6564 6499 6565 1030 6566 6079 5809 5193 778 6567 6568 1870 3378 6569 6570 4611 6571 1567 1033 5213 6572 2680 6573 6574 6575 6443 1388 1176 1229 1463 1156 6576 6242 6577 6578 4623 1621 6579 5206 785 5205 6580 6581 6241 6582 6583 6584 6585 6586 6587 1043 1045 5473
216 753 756 755 6588 6589 6590 2649 5883 5886 6591 6592 6593 6594 6293 6595 6596 6597 6598 6599 6600
217 4567 1426 1406 1124 1385 6601 4402 1258 5543 6602 4437 5608 2973 1604 4463 6603 4170 6604 3702 5134 3261 1109 909 6605 5076 6606 1561 5362 5593 2025 2462 1122 4072 4120 6607 4144
218 4512 4328 1119 6608 6609 6610 6443 6611 6612 6613 6614 6615 4172 6616 6565 1161 6617 6618 6619 6620 4623 6621 6192 6622 4519 1038 6623 1405
219 2749 807 8 2637 2820 1546 868 6624 827 3277 817 1717 2812 6625 3588 1551 4310 721 786 1443 6626 3701 6627 2720 5710 3654
220 1860 2815 2851 2748 4330 653 693 1542 4995 768 800 2179 6628 0 9 4497 765 771
221 2720 654 824 657 710 765 2709 93 722 4995 3495 82 721 4585 6629 6305 2701 5136 1084 1136 1661 1049 6630 2108 13 6631 1651 1558 1442 2593 1004 1718 3063 662
222 82 820 69 0 3495 649 1532 868 1718 87 721 1541 81 2785 693 2737 710 762 2835
223 6632 2191 1098 5517 3363 893 6633 1090 4338 1323 13 894 4347 6634 6635 6636 1524 4172 6637 6638 6639 6640 6641 6642 6643 1271 6644 6645 6646 6647 4205 3295
224 93 823 4585 82 70 783 2710 67 4732 656 77 2753 6648 762 14 737 2641 2014 710 2902 4331 1018 6384 786 2156 4164 0 3495 2791 6649 814 4233 6650 774 6651 3421 6652 6653 6654 721 4314 6655 6656 2019 3129 2182 3245 6657 5060 6658 6659 8 813 3817 771 3083 3284 2806 6660 6661
225 1621 6662 1899 6663 3050 6664 1042 1163 2822 6665 1045 1043 6666 3267 1056 660 2684 1928 2050 892 4522 2804 2754 1901 2685 794 2788 3259
226 807 1443 3356 2967 6667 654 845 814 3518 3075 6668 3626 4309 5342 760 765 826 786 4590 6271 3256 4285 3421 3290 6669 4800 4997 771 6670 768 11 1551 1025 6671 3167 6672 783 650 93 692 743 6673 6674 2948 6152 6675 3292 700
227 1373 2226 4516 1040 1965 2680 1051 6676 3455 4396 1089 6677 2137 1084 1065 4334 4318 1058 3832 4199 6678 5577 7 779 4554 1119 3266 2259 5753 1129 1166 2143 1091 1556 1721 5531 1621 6679 1604 1111 1715 2559 2031 6680 4353 4160 1116 4178 1381 4265 1415 3265 1151 4297 1952 1418 3414 1071 1657 4138 3739 3742 1152 4359 4182 4193 6681 6682 2684 6683 2025 1401 1563 1062 2036 2033 1406 1510 6684 4358 4399 5805 4207 1688 4559 1031 2100 2466 6685 6686 6687 4135 1241 4430 6688 1403 3370 1396 4145 6689 1121 3273 1102 1203 1234 5209 6690 4556 1195 1105 2147 6691 2236 5579 1645 1392 1378 6692 6693 2141 6170 1452 3268 1960 5813 6694 4121 6695 5203 4612 2199 3269 3729 6696 1640 1063 5254 1124 1117 1601 2274 1187 3745 6697 1380 5090 1641 6221 1379 5819 6698 1591 81 1033 6699 1175 1389 1185 1138 4261 1090 6700 6701 5469 4533 1077 6702 5784 5826 4 1043 4102 4269 1385 1581 4209 1098 1123 1939 1221 1149 1140 1712
228 703 5053 6703 853 3594 4580 5062 6704 6705 4282 6706 5286 6707 855 5186 6708 6709 5509 3057 6710 5355
229 5191 4427 1059 6711 1063 1569 4396 1128 6712 5465 2410 781 6713 6714 1050 1045
230 3508 6715 1541 3518 87 981 3430 704 4711 1543 665 980 1707 648 6716 4330 3045 657 762 3760 2804 2748 860 4313 6717 6718 3248
231 1064 1065 1024 1140 2737 3488 2720 710 1534 2638 3484 760 981 1443 807 669 653 650 654 6719
232 3538 657 827 11 2179 1716 821 1539 1000 1545 4111 2965 2907 2729 2820 68 2739 5870
233 6720 768 852 6134 3701 5507 760 6721 2637 11 827 709 844 5908 1446 696 81
234 6722 5801 4905 6723 3654 4303 6724 6134 2825 6725 5677 6726 2772 6727 696 855 2736 2732 6728 6729 6730 3637 2846 6731 6129 2895 6732 6733 6734 6735 786 3256 6736 6737 6738 6739 6135 6740 6741 2015 6742 6743 6744 768 6745 6746 2853 3642 6747 6748 6749 774 2935 6750 1015 6751 4900 6752 5182 6753 6038 693 6754 2014 6755 6756 6757 6758 6759 3763 665 3045 6760 6761 5844 6762 6763 2838 2859 6764 3638 3626 6765 6766 6767 6768 3613 6769 6770 6771 2731 6772 5649 6773 5491 2894 2775 2017 6774 6775 6776 6777 6778 6779 6780 3516 6781 6782 2176 805 6783 6784 5017 6785 6786 2733 6787 6788 721 6789 3583 3062 6790 3305 6791 6792 3788 1445 1043 6793 6712 6794 1050 6221 6382 3640 6795 6796 6797 2835 5853 3067 3643 2871 6798 3633 6799 2849 3054 6800 6801 6802 6803 6804 6805 3639 2863 6806 6807 6808 6809 6810 6811 6812 3498 6813 6814 6815 6816 6817 6818 6819 6820 6821 3053 6822 3081 6040 5229 3506 6823 6824 6825 6826 6827 6828 6829 6830 6831 6832 6833 3584 6834 6835 6836 6837 6838 6839 6840 6841 4495 5687 6842 827 6843 6844 6845 6846 6847 6848 6849 6850 860 6851 6852 6853 3418 4101 3755 6854 6855 3678 6856 6857 6858 6859 3077 6860 6861 6862 6863 4497 3307 6864 6865 6866 6025 3701 6867 6868 6869 6870 6871 6872 4165 5865 6873 771 6874 6875 6876 6877 4081 709 4314 737 69 1717 89 6878 3064 6879 5012 6880 2869 6881 3521 6648 6882 6883 6884 6885 1627 6886 6887 6888 6889 6890 6253 685 2752 6891 1708 81 4979 6892 6893 6894 2718 731 6895 6896 6897 6898 6899 6900 6901 6902 6903 6904 5147 6905 6906 2958 6907 5284 6908 4236 3051 3127 6909 760 2773 3071 2861 6910 6911 3168 2865 3065 6138 6912 6913 6914 826 5856 4865 6915 6916 6917 688 6918 1709 6919 6920 6039 5502 4800 683 6049 6921 75 6922 3603 6923 6924 6925 3598 6926 5365 3601 6927 738 84 6928 6929 6930 2806 6715 6198 697 6931 3046 6932 6933 2934 2963 6934 6935 2873 6936 6937 6938 6939 2232 4492 6940 6941 6942 6943 6944 700 6945 765 6946 6947 6268 6948 2751 6949 821 3507 1852 981 6950 1853 6951 3133 3733 6952 6953 6954 6654 6955 6956 6957 2022 6059 6958 6959 6960 6961 6962 3777 669 6963 2781 3167 5148 2790 785 6964 4244 2769 6965 6966 1044 5156 6967 4320 4526 5532 5539 6968 6969 2702 6970 6971 6972 6664 6973 6974 1209 6975 6976 660 4604 6977 6978 6979 904 5717 6980 5095 6981 1042 6982 5540 6983 2036 6984 6985 1127 5223 3273 6986 6987 6988 6989 6990 2678 6991 1929 6992 6993 6994 5209 1163 857 6995 6996 1899 6997 1919 6998 5541 6164 6999 7000 4035 7001 4516 5100 1562 7002 7003 2143 4017 7004 1569 1874 1425 7005 7006 7007 1683 2603 1099 5582 2333 7008 7009 5215 5530 1086 7010 1921 2428 5018 5591 7011 1968 1996 2422 3706 7012 7013 7014 6576 7015 7016 6242 4864 7017 773 1711 7018 5 1632 7019 2932 7020 7021 7022 4406 5587 783 7023 2804 5072 6119 7024 7025 7026 2293 7027 7028 7029 7030 4018 7031 7032 7033 7034 7035 7036 2199 7037 1697 7038 7039 7040 3533 7041 7042 7043 1614 3276 7044 7045 7046 1089 7047 7048 4536 5577 4337 7049 4220 1581 7050 4313 7051 7052 2787 2706 7053 7054 7055 7056 7057 7058 7059 7060 7061 7062 6574 659 7063 1025 7064 4397 7065 5596 7066 7067 2502 4358 7068 1496 2618 7069 2550 3834 7070 3286 5569 7071 2912 7072 6 7073 7074 4608 7075 2009 7076 7077 1056 6587 7078 7079 7080 2179 2941 7081 7082 6447 7083 7084 5198 7085 2969 7086 4299 7087 7088 5351 7089 7090 1142 6692 7091 4477 7092 7093 802 1823 7094 7095 7096 2173 7097 7098 1130 7099 7100 7101 892 7102 6563 7103 7104 7105 5258 3831 781 3456 2064 1897 7106 1579 4031 7107 7 7108 1077 7109 7110 4469 2685 7111 7112 7113 1499 7114 7115 7116 5224 4102 7117 7118 1157 7119 4893 1114 4621 7120 7121 7122 6386 893 7123 7124 4099 2933 7125 1067 1026 1595 5038 5873 7126 7127 1422 7128 7129 2378 2096 6248 7130 1189 1233 814 7131 7132 7133 6662 7134 7135 1129 7136 6151 7137 7138 4939 4966 7139 7140 7141 6675 3651 7142 7143 6053 7144 7145 7146 2748 7147 7148 4237 7149 1979 7150 4384 4172 5623 7151 10 4266 7152 1222 5562 7153 7154 5465 4327 3296 7155 7156 2000 7157 7158 7159 7160 5521 7161 4919 1596 7162 7163 7164 4396 1619 2548 1166 5103 5484 7165 7166 7167 4873 7168 7169 1597 2328 7170 7171 7172 7173 7174 4539 7175 5561 7176 7177 4490 7178 7179 7180 5635 7181 1070 7182 1572 5547 1555 5597 2221 1584 1204 7183 7184 7185 2206
235 1143 1071 1611 4566 1051 2320 1581 4216 4193 5808 7186 7187 7188 2096 1056 5199 4217 7189 1140 4138 1216 1116 7190 4264 1385 1138 7191 1389 1221 3747 1441 7192 1412 1518 1100 1322 1249 7193 4350 4172 1134 4202 1252 7194 7195 7196 909 7197 7198 5364 7199
236 4395 1139 7200 1385 4183 4528 7201 1397 4350 4257 1149 4211 1114 5202 5618 7202 7203 7204 1134 4028 7205 7206 7207 7208 1245 7209 6529 6117
237 2765 5763 7210 649 3638 2638 2759 7211 5910 1165 3069 6384 817 2729 3045 711 0 1546 2014 81
238 617 4693 1681 607 598 565 838 4858 573 839 589 994 2923 1677 1675 583
239 1666 5185 3389 3394 4048 4052 944 7212 4039 3405 938 932 3393 3395 935 7213 3386 3397 5263 947 3401 3399 7214 943 3412
240 2708 3757 7215 4897 650 5038 844 2770 4938 7216 7217 7218 7219 7220 7221 7222 7223 4305 7224 7225 7226 5913 7227 7228 7229 7230
241 92 93 6157 1860 682 3522 786 4330 7231 709 2968 4111 7232 7233 3645 1546 1547 2012
242 5846 5794 6750 3788 3284 2020 6913 3628 7234 2015 3678 6803 6651 2901 7235 7236 2868 7237 7238 6655 5350 7239 701 7240 7241 7242 7243 7244 7245 3637 7246 7247 7248 7249
243 1098 5807 7250 3832 7251 1046 1081 4360 1553 1533 5774 4488 7252 7253 7254 3426 902 7255 7256 7257 7258 2679 7259 3372 4995 7260 7261 3259 7262 2809 5492 7263
244 7264 949 4043 7265 937 5184 4048 950 3409 7266 4062 939 7267 7268 3386 7269 7270 4986 7271 4687 7272
245 5731 1972 7273 1809 2120 4570 4153 7274 7275 7276 3346 1836 7277 2089 7278 7279 7280 1874 7281 7282 7283 3367 7284 7285 3457 1440 7286 7287 2354 7288 7289 1231 1196 7290 7291 7292 2568 2662 1998 2320 5757 1884 1592 1688 2244 2317 5810 1810 1831 7293 1638 7294 2073 1846 1699 7295 4136 2245 6682 7296 7297 3336 1803 3363 3341 2258 7298 3216 2160 7299 2581 7300 2443 7301 5127 7302 2310 7303 5194 3704 1658 7304 7305 2273
246 4183 1846 4153 7306 909 4494 4590 3530 7307 703 4274 7308 3493 7309 3334 1054 2110 799 1119 2664 6826 708 7310 2732 2835 3643 732 3626 7311 5864 805 6278 6037 7312 7313 7314 2020 7315 5058 5235 6751 3071 7316
247 1665 6066 582 69 0 93 7317 570 4688 7318 7319 4691 4698 573 996 4672 597 7320 572 4684 569 991 993 1313 608 7321 612 7322
248 11 1006 649 1549 786 7323 7324 4705 3499 672 743 2835 4997 2941 4497 1628 2964 7325 7326 7327 4795 7328 6325 3179 7329 4557 1029 7330 7331 7332 1011 1010 8 7333 7334 3080 3651 6269 826 3817 7335 693 6659 719 0 7336 6268 3489
249 69 11 657 1716 4164 827 3539 3593 7337 764 3760 2765 710 762 2892 2014 7338 1019 4996 5150 2791
250 1805 2104 1143 1149 929 7339 6230 1441 7340 4527 1322 2255 1391 4186 4530 4343 1430 1645 1112 4405 1971 4327 904 4454 1438 2911 1152 7196 7341 1458 7342 4488 1031 927 5209
251 693 2956 2960 5158 2880 7343 3499 2830 79 6124 7344 2958 2831 2946 5342 7308 3488 5717 2955 92 7345 7346 7347 4088 7348 7349 6773 1708 7350 5663 5500 7138 4237 7351 7352 5344
252 1053 893 1128 6576 2685 1509 771 7353 7354 7355 776 665 2813 15 7091 3259 0 7356 4772 2134 7357
253 4884 322 504 7358 4007 7359 4703 7360 866 7361 7362 7363 7364 7365 880 7366 7367 4772 7368 6136 7369 7370 7371 883 7372 7373 7374 7375 7376 7377 7378 7379 3186 3859 7380 7381 4795 3171 7382 7383 7384 7385 7386 7387
254 5160 3099 1480 1137 4263 4384 5108 6992 13 7388 1084 2618 7389 1133 2584 4536 1415 7153 777 868
255 689 669 93 7390 15 2928 787 650 7391 7392 5685 4326 1551 2941 82 7393
256 4186 1639 2110 5630 1887 7394 4135 7395 4300 3365 7396 1857 7397 7398 3294 3366 2663 7276 6223 2372 1830 5592 7399 1913 930 7400 2104 7401 7402 7403 7404 2436 7405 4156 7406 5766 7407 2448
257 4492 2785 696 653 4900 7215 3290 5229 4800 7408 7409 3612 5017 6941 5158 4943 4295 3518 720 7280 5669 2020 7410 3638 6736 6765 6751 7411 7412 2826 3517 7413 93 677 842 7414 90
258 2820 0 6765 760 787 774 3518 7415 7416 5482 2026 7417 7418 893 7419 7038 7420
259 559 2952 1853 711 7421 6202 2753 7422 7423 665 2945 7424 7130 88 7425 715 7426 1826 6152 7427 7428 2012 2706 786 5685 1682 3778 7429
260 2765 817 2638 2908 7430 3291 7431 7432 7433 1528 7434 7435 2897 696 3800 5172 6151 6928 7413 3634 3626 4963 7436 7437 7438 4939 7439 7440 7441 3603 6827 3629 7442 5465 1018 3615 7443 852 5023 7444
261 5691 761 73 3489 2708 3057 7445 3593 11 13 4149 1556 1995 7446 1840 7447 7448 1196 1985 2330 2306 2312 2071 7449 4217 7450 2699 1661 3337 1509 3 2087 7451 3334 5600 708 4137 5073 1426 3595 7452 852 88 7453 7454 7455 3560 2273 7456 1446 1798 7457 7458 1805 4527 2671 1474 7459 649 7300 3706 7460 906 1812 1986 2033 1842 1927 5574 1802 1838 2049 6113 7461 7462 1055 1091 1797 1189 7463 6702 1972 1814 7464 1881 4205 7465 7466 2255 7467 1829 7468 7469 1185 918 7470 7471 2131 4173 7472 4116 2218 2431 1602 7473 2044 7474 2048 7475 1810 7476 7477 2143 7478 2512 7479 1875 7480 1395 1191 7481 7482 7483 1887 7484 2215 4135
262 1189 4399 1105 7485 1160 4369 7038 7486 6971 7487 4035 1474 7488 7062 1240 7489 1256 1526 2068 7490 7491
263 7121 1102 1498 7492 7493 7494 4388 1220 4873 1037 4435 7450 5110 7112 7495 6211 1055 7199 2702 1512 7496 1038 4257 1138 1130 7497 7498 5567 1524 7499 3265 1427 6606 7500 7501 1257 1629 4328 7502 7503 7504 2494 6465 7505 1244 1089 1338 4891 7506 7507 7508 7509 7510 1243 7511
264 3346 1373 5529 1196 1639 7512 1910 1638 7513 7514 7515 7516 7517 7518 7519 7520 1981 1894
265 4 4024 5561 1143 1045 4882 3072 586 5311 7521 7522 7523 579 7524 560 7525 7526 595 7527 7528 5165 7529 7530 7531 7532 7533 1676 7534 828 578 1267 4681 7535 3473 5295 7536 7537 6066 7538 4543 5578 1921 1070 7539 1156 1609
266 807 3083 3544 1044 1043 4016 1046 1088 7540 3266 2683 1203 2147 1443 760 788 4493 81
267 868 4863 2770 1042 1109 5110 6972 4094 1683 1001 0 1546 1717 6722 1537 4992 6204 7541 1486 7542 7 1142 300 7543 5493 5510 3083 7544 4280 6146 2772 2737 2787 13 3425 5517 1045 802 649 1003 2739 2763 5228 2678 3045 1628 762 2784 2768 2902 69 816 2904 15 4325 7545 2793 7546 3064 7547
268 5788 920 1095 1051 7548 4137 13 7549 6389 4195 7550 3749 1604 5791 2186 1151 973 1351 7551 7552 1228 1463 2912 7553 1384 1143 7554 1229 4015 929 7398 2099 2027 7555 7556 1084 799 7557 1810 2210 1182 7558 1455 2320 7559 2008 7560 7561 2174 7562 7563 7564 7565 2259 7566 1031 7567 4707 5787 4324 2079 2088 7568 2248 1971 2224 7569 1397 6464 7570 1041 7038 3702 4186 7571 7572
269 7390 669 2772 673 762 738 1717 3489 2710 2766 652 7573 716 5872 649 92 4382 665 69 648 2740
270 5101 7574 2330 1410 7575 1031 7576 1927 1939 4197 4220 7513 2431 7577 1207 2274 1875 1189 7578 5122 2310 1737 1136 4137 1251 4404 1412 1657 4173 3236 1330 7579 1252 7580 5486
271 696 6035 1005 3129 5351 2019 2725 1539 1549 1540 7581 769 3530 3793 673 7582 7583 2874 1537 7584 3524 7585 811 5037 3591 3604 5829 2731 2968 6049 7586 2825 668 7587 2184 6030 7588 7589 7590 7591 2797 7592 7593 2175 706 7594 842 6883 7595
272 1716 300 1717 4862 786 2826 708 1546 7596 764 3280 852 7597 649 711 87 657 980 868 96 669 7598 7599 7600 7601 7602 7603 7604 7605 7606 7607 7608 7609 674 3550 7610 11 3083 7611 6253 81 92 6933 7612 7332 2767 3179 710 6252 716 2017 7613 721 824 4791 7614
273 1848 2259 929 7615 1255 7616 1155 1737 7617 4117 7618 1185 3217 2191 1095 1085 7619 1051 1182 4200 3338 1939 1965 2462
274 2031 2383 2310 4475 1407 2226 1926 1939 3346 1214 7620 5803 3262 1846 1638 2096 1960 7621 2666 4533 1031 2663 7622 7623 7624 4160 811 2255 2372 84 7625
275 1315 7493 6439 7626 7627 7628 7629 7630 7631 7632 7633 1329 7634 7635 7636 7637 1253 7638
276 6763 3639 5505 2855 7639 7640 4897 2860 6861 7641 725 3512 2849 3311 2757 5857 2845 5488 7642 7643 7644 7645 7646 7647 2175 7648 1529 7649 7650 7651 842 7652 7653
277 2637 2462 709 2708 4271 7654 7655 7656 7657 2714 2897 3426 12 2012 3865 774 2014 7658 7659
278 1312 6064 2924 4857 623 576 4687 7660 7661 617 4150 622 571 3474 563 569 605 1675 572 7662
279 1554 4546 1545 5870 2638 1716 1001 11 3538 824 3356 3504 3585 769 1003 2787 1445
280 7663 3113 1279 7664 959 7665 7666 7667 967 7668 635 6304 7669 963 3121 7670 1283 626 7671 1298 7672 7673 7674 7675 7676 7677 6297 7678 1782 7679 7680 2673 7681 13 1602 5579 5258 1715 1413 7682 976 7683 3109 7684 7685 7686 5447 7687 3096 633 7688 964 1774 7689 7690 1344 1286 7691 7692 7693 7694
281 4337 1030 2203 4134 2125 4072 1228 1379 1044 1119 1841 4893 1137 1090 1142 3739 1051 1395 1143 4258 1092 2466 2154 5816 6680 3217 7467 803 7695 5778 4358 4436 1076 1598 5633 1149 1518 1170 1152 7696 1077 4178 7697 1066 1156 2037 7698 3824 4128 7699 1101 4217 4453 6309 4339 1442
282 2846 7700 3529 5056 5506 4900 5009 2882 1716 743 7701 3545 2641 4928 703 3605 2964 2720 4078 4901 3493 4081 5345 5047 5666 7702 3511 4927 3609 7703 5038 2020 7704 5046 7705 1685 4939 696 3504 6723 2179 7706 1545 4895 2836 5700 7707 7708 7709 5594 1089 6780 5675 5045 5850 5667 5690 3539 7710 3356 764 1000 7138 7711 4791 3512 7712 4919 7713 3525 7714 7715 4790 7716 7717 7718 7719 7720 3563 2852 7721 7722 3591 4091 2813 5354 69
283 1543 3356 1001 669 786 670 731 673 75 1532 6197 814 6119 3507 300 4830 240 5983 379 7723 4822 5929 51 7724 3432 7725 7726 7727 3315
284 7728 1280 7729 7730 7731 1287 7732 5443 1736 7733 7734 7735 7692 7736 1792 7737 7738 1786
285 650 7739 3071 3479 6068 2826 6774 2771 2956 3058 7544 7740 669 2832 7741 4590 7742 3168 703 1682 665 3422 1718 2765 69 7743 3083
286 4252 1146 7744 4346 2911 1646 4220 4408 3734 4180 1463 5254 2684 6970 1044 1203 6211
287 737 1001 817 2737 1717 813 709 2753 868 4863 3422 688 7745 7746 3483 1718 1532 92 772 4495 7747 6278 7748 1004 1003 7749 1627 2746 15
288 4541 1998 4911 81 1821 1984 1982 7750 7273 2051 3338 1031 3376 2077 7751 7514 4418 5749 7752 1036 696 76 1859 7753 5819 7754 4730 6644 596 2624 7755 7756 7757 7758 7759 891 1114 4137 7760 2199 7761 1244 2467 1188 7762 1804 2187 7032 7763 7764 5377 659 2604 7765 7766 7123 7767
289 1108 5543 4459 4425 4 1385 6390 1398 4183 1393 3702 1247 7768 4180 4402 5583 1473 7769 7770 4348 6601 4515 4424 7771 6239 7772 4343 3733 5634 1657 1143 1112 4353 1239 7773 7774 7775 4548 1132 7776 1928 4269 1399 1059 4257 5193 3742 1159 1382 1592 2405 4570 1134 2021 659 4206 4870 5199 5579 1490 1983 1411 5571 3268 7777 1094 5545 3703 5838 781 7778 7779 6290 4567 1414 2508 5218 4608 4337 1453 7780 4173 7781 1419 1518 1649 1109 7782 5628 4234 7783 7784 7785 7786 4209 6381 7787 1646 1643 7788 1137 1602 1069 903 1098 4158 1693 5570 4377 7789 1404 782 4347 1072 6692 1653 5598 5137 2141 1084 4412 2199 1103 7790 1060 4361 1148 1388 2617 4125 2911 1075 4876 7791 1426 1222 7792 778 13 4177 1924 7793 2025 1424 7794 1152 7795 1448 2728 1116 3425 3822 909 4569 7579 7796 5362 4882 1232 1030 4346 7797 4873 1451 1126 1174 799 1078 5083 4144 7798 4357 7799 1474 7800 7801 4072 6206 5255 4389 7802 2682 4874 4103 1401 6209 7803 1566 6237 4351 1648 1459 4391 3286 4186 6116 1250 7804 4630 4455 1647 1377 1110 7 1142 1405 7805 660 4398 927 1662
290 7806 7807 1716 6776 7808 1549 7809 3528 5672 817 7215 4305 6948 4242 7810 6952 3506 7811 7739 4971 7812 5045 855 804 7813 5345 7702 7814 5277 6128 3504 4962 3503 7815 7816 5725 4293 5717 1006 6273 7710 685 7817 4939 7818 2958
291 1001 1541 653 665 3480 3356 980 2718 2928 7819 84 7573 3061 788 2851 0 7820 6
292 6245 1386 1056 7821 1385 7799 1486 1321 1471 7195 7485 1663 7822 1187 1134 2682 2330 1475 1253 1149 1457 1108 1604 1971 1152 7823 1461 7800 4465 1111 1258 4515 1075 1378 6185 1384 1104 4134 2051 4139 1463 1965 1875 918 1065 1230 4449 4074 7618 3832 1376 1216 2273 1031 1646 4144 799 1995 1837 1057 4548 2686 1143 4435 1330 1248 1456 1518 1797 1116 6106 4183 7824 5833 7496 4484 4524 894 1467 6204 1647 1969 1051 1176 4178 2512 1164 4132 1785 2559 1183 4376 929 1810 2259 5253 4138 4114 1968 1109 1460 4425 4072 4386 5469 7825 3275 1095 6607 4530 4364 3273 1377 4517 7826 3702 1473 5134 2972 7558 1798 7827 1071 1250 7188 1259 1153 6174 4350
293 1534 1533 806 767 8 843 3510 88 6198 7828 722 7829 69 649 813 4111 3507 981 81 93 786 710 1530 817 3422 1535 3760 2765 2179 3590 7830 2835 4164 696 743 4949 7831 3495 4079 3600
294 2874 3290 4991 769 3568 2798 762 2744 701 2720 4858 2830 2909 1002 7597 5147 4162 3186 3968 7832 704 773 7833 2803 785 1245 5685 1075 2804 7434 7428 4282
295 3436 7834 3302 7835 7836 7837 3433 7838 5883 6287 7839 7840 7841 7842 7843 5884 7844 7845 7846 7847 6594 7848 7849 7850 7851 7852 7853 7854 7855 7856 7857 7858 7859 6592
296 805 2908 3645 5500 770 7860 7861 7862 7863 5687 3503 2834 7864 1000 2736 2852 3280 7865 783 2720 827 650 2179 760 7866 4911 7867 1443 3083 1530 848 653 7868 4237 824 7869 7870 2785 3494 7871 4078 844 2826 2638 696 1682 853 3281 2965 4304 3506 5676 3524 4927 2925 6736 715 3045 5870 1718 5675 7872 2847 7873 1006 662 652 2726 694 2713 8 768 724 7874 4301 2735 813
297 3280 0 1717 821 648 2737 2714 786 722 669 813 3495 3045 11 764 657 2950 7875
298 7876 3167 1001 649 1531 4862 821 1551 683 3241 1685 1542 4992 4860 981 81 7877 868 1543 6909 4111 2964 8 2765 7878 2952 852 1708 765 3607 4313 785 774 7879 3654 3421 5156 2807 2942 7880 6652 7881 706 5158 4507 2763 7393 3418 6018 3510 2023 2096 7155 15 3245 7882 7883 7884 2803 4498 3488 4980 2791 2179 2706
299 1051 2089 7885 1031 3542 7886 7887 1130 4283 3821 7888 3740 1097 1333 1458 7889 5362
300 3077 2813 2832 7890 4924 7891 4495 7892 7139 4239 7893 7894 7895 5649 7896 6734 7814 5173
301 4186 1054 5204 1797 1799 1221 1798 1887 5227 4259 4415 7897 1837 1071 7898 799 6243 1214 1091 1404 1386 7899 1972 1196 2281 7252 665 685 703 1473 4194 7900 1226 7901 1105 1053 4543 3372 7902 1598 4036 1648 1104 1114 5516 4513 4448 7697 3050 1255 2052 1391 1684 691 7903 4198 7904 1323 1125 5224 1979 7905 918 7472 7906 6662 1111 7907 2112 1638 1652 3721 1208 1660 1999 1812 5228 4880 4551 7485 3831 2320 1170 1325 1172 2222 2227 7908 2509 7909 1176 1761 659 7910 7911 5191 6236
302 7912 3725 1089 4178 1165 1218 4102 5477 1833 5620 3266 4420 5092 1184 1206 1601 893 4035 5524 1983 2680 1030 4358 3715 5617 1897 5560 1591 4406 2678 903 5136 1587 7913 5528 4522 1442 1616 3826 1576 1650 1580 1589 5618 3713 2137 5578 1222 5635 1119 4434 5215 2096 5748 7914 2165 5095 7019 7915 3750 6386 1207 5548 4250 1115 1426 1452 3425 6244 1161 1158 5568 5634 7916 2380 5212 7917 4567 7918 2378 4028 7919 4154 4546 6166 5266 1429 7920 4601 4570 7921 1232 4318 5202 7922 7923 1070 1894 1602 7924 3832 7925 1090 2313 1614 3717 4145 5732 5565 5612 7926
303 7927 3836 6338 7928 0 5148 2019 3506 2179 87 692 676 3538 769 69 669 649 3497 709 82 721 7929 5033 7930 7368 7931
304 11 721 824 4657 1545 2930 4330 827 709 714 1549 87 69 7932 3063 2785 2851
305 694 4981 1541 7661 3467 5287 1664 1681 7933 4686 2925 2737 3277 868 4979 4697 300 7934 7935
306 1001 981 7936 7937 4588 7938 7939 2736 4162 1006 94 2770 1019 1539 4110 4166 649 3626 7940 7123 7941 7942 3 7943 7944 659 4427 7126 7945 7946 5632
307 7947 696 6258 703 6896 5001 5908 5499 7948 6836 2640 6763 6837 4899 4921 2836 5845 7949 3690 7720 3071 7950 3545 2801 5854 5047 729 3512 7951 2957 4305 7952 2835 7953 5491 7868 842 2849 3499 3524 5648 2020 3521 3500 7954 732 7955 7956 5669 3529 7639 7957 742 3083 852 4111 7958 1444 2179 5488 7959 3607 2880 3317 3612 6660 7960 4492 7961 3291 3311 6750 7962 7544 3300 3651 7963 5355 7964
308 1105 7965 1646 3236 1073 799 914 5772 3216 1104 7966 5629 1111 1153 7967 3372 7968 7969 7970 2517 2679 5511 1593 1426 7971 7566 7972 7973 1126 4269 1226 1804 7793 4363 1030 7974 2320 1420 7975 5810 7976 7977 2568
309 710 2734 4995 11 7978 807 657 2718 714 1682 2775 669 7979 2957 6030 709 3498 4711 708 7120 721 4862 1528 2814 2815 649 7980 762 1532 7981 2756 2760 16 8 2792 698 1628 2711 821 731 4497 665 1540 2820 2941 711 1003 827 2944 12 770 92 2771 2012 2748 1684 2014 816 810 654 1716 1534 2804 4996 2799 7982 5150 2781 774 7983 0 7984 2823 786 2780 15
310 7985 6077 4602 7888 7986 7987 1657 1122 7988 1130 1475 1384 7989 7990 1377 7991 1137 7992 7993 7994 7995 7996 4437
311 7997 5162 7998 7999 8000 8001 8002 6637 8003 8004 8005 8006 1668 8007 8008 8009 8010 6643
312 8011 8012 842 3488 7947 2887 8013 8014 722 2836 1709 703 731 4508 2733 4161 827 764 4910 2785 3482 824 2720 8015 5504 6819 4791 4248 4111 738 4231 11 817 4310 999 7608 1537 69 4863 3422 4860 8016
313 2462 685 5488 76 4904 6202 3256 3541 6018 8017 8018 765 2708 2735 2787 7980 8019 769 2814 1542 1532 1718 87 8020 2760 4978 786 8021
314 472 8022 467 106 475 4806 4841 8023 164 4840 5948 19 4836 26 72 18 8024 4821 8025 8026 2989 8027 406 8028 31 8029 2987 202 243 440 147 8030 30 259
315 1064 799 2728 8031 6698 7031 6955 8032 8033 7083 6 4522 6164 1087 7540 8034 1006 7707 13 786 8035
316 69 1000 2720 82 657 2722 665 812 2820 654 1716 4996 1549 81 4311 8036 2014 8037 785 12 3247 980 1682 93 8038 1025
317 1725 6318 8039 1339 1723 1305 633 1724 970 1759 2673 1353 960 1306 8040 8041 967 1760 1777 630
318 986 2919 8042 553 8043 8005 575 8044 8045 8046 8047 7523 8048 8049 8050 8051 8052 602 1311 8053 8054 8055 8056 8057 8058 8059 583 5290 8060 8061
319 817 827 1443 8062 1545 8 92 1684 1529 2787 762 685 69 710 2740 4332 2927 774 2806 8063 8064 2811 669 3332 1015
320 868 6652 11 710 3489 1718 0 6669 2836 3131 698 8065 1853 1214 1155 1084 3248 8066 1056 3260
321 8067 563 1312 1670 8068 1277 586 1103 6306 8069 4 1194 5538 7804 4826 8070 8071 4522 48 8072 225 8073 3088 568 1272 608 8074 802 5228 8075 8076 7613 7052 772 8077 2925 8078 8079 769 2787 5018 2754 2738 2814 8080 8081 8082 8083 8084 8085 8086 4771 8087 8088
322 1711 1853 1532 87 688 2765 1937 657 653 817 3132 8089 1682 2179 2866 3760 3332
323 8090 8091 8092 783 3200 6374 4066 6303 8093 8094 8095 8096 8097 8098 8099 8100 8101 7835 8102 6356 6348 7732 8103 8104 8105 8106 8107 8108 8109 8110 8111 8112 8113 8114 8115 8116 8117
324 3386 3410 4039 951 937 3402 3406 4057 4040 4058 3407 8118 4059 7271 4048 4986 4043 949 952 3389 2 4044 947 3394 3400 3401 943 7264 953 8119 4050 8120 8121 4056 8122 940 4983 8123 4053 948 7268 4984 8124 4051 8125 4061 8126 8127 8128 8129 3396 8130 8131 8132 3395 8133 8134 4982 8135 8136
325 8137 1556 1315 6215 1093 613 1566 1578 3512 3592 3539 653 713 2959 4862 786 1598 13 1130 8138 8139 4686 6969 5038 8140 8141 4979 6933 7355 5470 4357 4608 7936 8142 5321 8143 2744 5755 1034 1172 7543 5072 3584 2951 8144 8145 8146 7604 7910 3820 8147 1323 3274 7023 1195 8148 649 8149 3426 4910 3549 1707 8150 738 8151 8152 8153 2964 74 8033 3736 1540 4164 2781 1682 4531 8154 8155 8156 4101 8157 4584 4705 4791 3307 8158
326 8159 8160 8161 8162 8163 8164 4718 6284 2645 8165 6282 7855 8166 8167 6374 8168 6335 8169
327 807 2775 860 5678 3599 7878 693 2747 737 3129 5490 1684 2734 8 73 4287 2737 77 711 5350 4304 8170 1682 762 724 2643 7745 2749 821 2017 2756 2714 648 842 662 770 8171 1529 815 4586 848 8172 2792 1546 2965 5329 710 2812 698 709 8173 7573 2892 3490 5371 69 2928 1015 2724 2785 730 16 783 2637 8174 2019 4939 2794 3625 2826 852 2723 2715 5687 2757 3062 680 87 6119 7876
328 8175 5609 1051 1841 1102 5808 1230 6218 8176 3414 1111 1228 4131 4354 920 3050 8177 8178 8179 5806 661 7013 1645 1149 4134 5375 4119 1152 1050 6685 1185 1048 4113 4200 1418 2086 1429 1601 1867 3738 2465 4396 1031 2439 8180 1512 1109 1837 3724 1797 1255 3742 4268 4264 2033 3745 2089 1110 2974 4473 8181 4435 8182 8183 8184 1251 1977 1800 1142 7564 2160 4339 1324 7459 7420 1640 8185 1956 4203 8186 1245 2225 1798 1931 1829 1824 2085 1591 4213 7191 8187 3456 5579 2603 1642
329 1109 4158 3288 1645 1069 4168 1045 2165 7906 1053 1399 8188 1065 5535 1425 799 1046 8142 8189 2261 783 8190 8191 5560 1404 8192 5228 5 6567 2222 1114 1143 8193 1619 8194 660 8195 6108 8196 2683 8197 1455 4469 8198 6236 4461 1078 6184 6565 8199 1318 2199 4453 2687 6308 7805 1617 897 4564 2686 1102 2345 2593 1245 1902 1244 4388 8200 1253 7190 4450 1327 1901 1135
330 1319 6108 8201 1104 2684 1111 7197 5602 4269 1070 1207 1142 2160 1380 1195 8202 7790 6606 4177 3748 1135 4564 1993 2222 1887 2255 7017 1999 6609 4880 8203 1126 6075 8204 8205 3079 670 8206 6139 5869 1153 1623 1226 5516 1429 1474 2569 4361 1145 4 7751 8207 1193 8208 892 8209 6399 8210 8211 5205 1196 3414 7464 4476 8212 1243 4459 3750 1426 6997 1879 1813 4183 8213 4270 8214 8215 899 1967 4107 1201 8216 3296 8217 1156 5777 1254 1050 8218 5461 7903 6167 1222 1412 6105 8219 6432 1055 7341 799 1114 2680 4415 2410 13 4168 1899 8220 8221 1235 8222 1761 7415 5471 8223 8224 894 1144 8225 8226 8227 3373 4144 6237 7287 4074 8228 4186 6211 1647 1377 4410 1837 4026 1084 8229 2814 5577 4307 70 8230 7747 1445 8231 8232 4284 2769 2736 3045 87 6106 1061 3839 5134 7780 8233 1921 8234 7925 5582 6230 1638 893 8235 7159 2231 1441 8236 8237 1204 4032 8238 1661 1996 2682 8239 6308 4299 4327 6 6440 902 5580 1901 8240 6955 8241 4482 4102 8242 2271 8243 1637 1953 8244 1990 8245 6409 2593 5515 1251 7699 1797 8246 8247 6241 5468 1457 8248 1320 8249 6498 5228 7470 8250 2874 6394 1656 1440 3266 8251 8252 8253 2445 6090 1053 3702 1910 6529 1480 5539 3752 8254 5518 1326 8255 5768 1172 1240 8256 3294 1250 4435 8257 2701 2099 8258 8259 1334 4630 1332 8260 8261 2189 8034 8262 8263 8264 1322 1504 1442 1324 2093 4877 2702 1439 8265 8266 7177 1420 1329 1057 1793 1478 7822 8267 1851 2632 5084 6071 8268 2052 930 8269 5116 6922 4376 1696 6575 1483 7161 4555 7029 929 7463 1646 3371 1818 1323 6576 4465 909 5636 4474 8270 8271 8272 4443 918 8273 1141 2509 1138 7465 8274 8275
331 6294 2637 698 2726 3055 8276 3762 3510 2838 1717 3291 3083 3660 4271 4237 6776 8277 3647 8278 773 8279 8280 8281
332 8282 2959 5353 726 8283 8284 4732 794 2803 2902 5876 8285 8286 5018 6146 8287 776 2826 3483 733 5654 8288 2860 8289 8290 8291 8292 5861 7433 8293 8294 7079 3074 6765 3678 774 15 8295 2927 1015 2895 8296 8297 2839 2015 7436 2170 8298 3811 8299 8300 8301 8302 8303 3651 8304 3312 2715 2859 3804 8305 1018 6053 3253 5172 8306 3305 6742 8307 8308 8309 773 2799 8310 8311 8312 786 8278 8313 8314 8315 4933 2806 3493 8316 8317 8318 8319 3245 2780 8320 3628 8321 8322 8323 8324 8325 5656 8326 4977 8327 8328 8329 5023 8330 8331 8332 8333 8334 2833 8335 7242 3789 8336 7245 8337 6653 8338 5175 8339 8340 8341 8342 8343 8344 4305 5001 8345 8346
333 1140 893 1563 1214 8347 8348 3267 2026 929 8349 1198 4488 8350 1240 2093 2702 1061 1058 8351 8352 2050 1913 8353 8354 8355 1209 8356 1556 2617 4388 1190 5090 1721 8357 4644 8358 6975 8359 6175 1119 7420 1979 8360 8361 8362 8363 8364 8365 8366 2148 1928 8367 8368 2705 8369 8370 1455 8371 5477 904 8372 8373 8374 2036 7549 1239 7509 8375 8376 5106 8377 8378 8379 4173 2139 8380 8381 8382 8383 8384 8385 8386 7577 8387 4876
334 7231 2846 724 6274 2785 762 3279 3525 8388 4332 4915 8389 90 8390 8391 2867 3490 2774 737 6197 2643 2902 8392 8393 8394 3777 8395 772 8396 6057 8397 4939 7138 2175 3807 2895 2851 2855 3497 2927 2870 2859 8398 6015 7878 842 8399 2783 2015 6815 8400 5328 3632 8401 8402 7949 8403 8404 6781 8405 1529 7235 8406 6385 8407 8408 7644 8409 2748 8410 2770 8411 6741 666 8412 8413 3678 8414 8415 3603 8416 7722 852 6750 6803 5855 3076 8417 8418 8419 8420 8321 8421 7544 8279 8326 8422 6898 662 2936 3300 2179 8423 8424 3698 8425 5175 8426 8427 3085 7435 7653 7228 8428 8429 3064 4933 8430 8431 4826 8432 8433 8434 8435 8436 4999 8437 8438
335 1725 8439 1762 1287 1723 1349 646 3094 1286 1758 759 8440 8441 5406 8442 1282 632 1351 3112 8443 1728 8444 8445 1763 8446 7735 629 8447 1350 8448 8449 8450 8451 8452 8453 4695
336 1541 981 81 2012 1937 3608 3430 722 668 8454 2737 3598 710 96 5149 1968 1990 1798 2036 930 2974 8455 1683
337 768 852 3600 2815 762 715 696 1709 1541 5869 2772 2715 662 1533 3045 2826
338 611 2921 586 4675 6065 1673 2922 988 8456 8457 571 833 838 7524 8458 4857 989 8459 8460 8461 3089 8462 8463 7535 7662 8464 577 595 8465
339 4613 4400 1031 4536 1592 1886 5517 1998 2255 1821 8466 5099 5803 6383 2666 2104 1696 4263 1514 6694 8467 737 721 2775 815 4094 3497 5814 4111 7695 1946 1797 7273 5825 8203 4160 6170 4155 1810 3343 1884 8468 5749 8469 8470 8471 2031 5765 8472 8473 8474 8475 8476 8477 6136 8478 8479 8480 8481 1143 2445 8482 8483 1887 8484 4074 1847 2596 2090 8485 1454 3340 8486 8487 1880 8488 8489 7467 5745 90 5780 7398 2623 3383 8490 8491 3375
340 2720 4991 787 4507 762 657 5439 652 786 774 2936 8492 1786 8493 8494 8495 5426 1306 6295 8496 8497 8498 1742 8499 8500 8501 7833 656 8502 6651 8503 0 8504 8505 8506
341 3402 5263 5261 4047 4041 7268 4039 948 4044 4042 949 3407 3401 947 3410 944 932 936 7271 3406 8507 4054 3391 953 3388 4574 5184 4055 950 940 4058 3390 935 3386 4045 3387 3392 941 8118 8508 1072 4396 3339 952 3389 3395 5264 657 738 2874 772 783 715 648 4981 649 11 2800 762 3490 8509 8510 8511 8512 2925 2739 4053 8136 4983 7270 4984 8513 703 2769 2179 2781
342 8514 6288 6303 2652 8515 752 8031 8516 744 6330 8517 8518 8519 6316 8520 8521 751 6351 8522 8523 8524 7842 664
343 3071 90 8525 6151 8526 2835 2740 3574 3553 8527 648 4301 4237 8528 5148 4274 8414 4991 6727 8529 657 3588 8530 701 3626 3603 1711 4911 8531 6905 4081 3591 7861 3772 2801 2849 5341 2753 8284 2685 7879 3323 740 2863 8532 2894 2895 8533
344 1156 5758 5100 8224 1431 1426 8534 1224 4415 8535 4169 7897 1327 1329 4201 1318 8536 6206 2686 8537 1457 8538 1322 1317 1458 1484 8539 5641 1324 1187 1493 8540
345 5500 5510 4589 5001 2813 5232 2713 7392 8541 4791 5727 4310 3538 7830 92 7722 2866 4904 8542 2967 3585 8543 689 1549 7721 5188 8544 8545 4111 693 3356 786 8546 4081 3516 8547 5717 7597 8548 1535 8549 7808 4899 6138 4247 6126 8550 855 5267 89 3763 7586 8551 7351 3488 88 3506 3479 6738 812 8552 8553 3626 8554 5000 4304 8555 4953 1446 7814 811 4590 8556 4497
346 1808 5807 4149 8557 5776 6389 5456 3365 2255 781 7294 8558 3294 8559 4151 4133 2334 1946 7458 1471 8560 4139 8273 1696 8561 5742 8562 1255 8563 8355 7471 1869 8564 7750 8252 8565 1840 1031 1810 1690 2593 1102 1851 2186 3372 4129 2079 1814
347 6588 8566 624 6317 8567 8568 8569 6282 2660 8570 7855 8571 8572 8573 8574 4 3729 1214 1057 1143 1393 1075 1056 2916 1084 1646 3276 1049 1114 891 4178 8575
348 737 4091 4110 743 650 5186 16 3482 827 3633 1001 2775 4927 5329 1685 859 2835 8576 4492 3083 3561 5056 2836 6123 3541 4238 5687 5679 1683 81 710 1940 714 811 8577 4244 8389 3045 7573 8578 4910 8579 696 7890 4309 3513 4921 867 668 5510 8580 1000 760 3593 1546 2731 1547 701 4083 5047 3519 728 857 5235 2881 6722 5683 4302 5355 6030 2847 3241 8581 3290 2020 2965 8582 693 5002 73 5230 709 5050 3493 3577 764 6709 3585 2892 769 3601 2959 690 3602 8583 8283 3543 4911 2953 2852 4949 8584 3607 1852 807 6708 2833 5061 5357 4293 2905 8585 2801 4577 3572 4304 3626 2826 6765 5354 702 2896 4280 2846 8280 2756 2787 2737 1716 1551 4303 3570 8586 8587 7892 7609 8388 7307 6909 4939 8588 3515 6927 3491 3527 3248 17 5870 812 648 2854 5012 3768 2851 5670 5876 5244 2886 3608 2868 3500 8589 8590 5801 3595 6027 7338 3574 845 6721 8591 7828 2637 2828 7315 8 8592 8593 8594 740 3766 2895 3568 8595 8596 8555 8597 3651 1019 6738 8598 6725 3689 2875 6920 93 3819 3502 3647 739 8599 2963 8600 3317 1003 8601 4705 7949 3652 77 8602 2800 7879 2797 8603 8604 716 7722 6134 7232 786 7583 2804 5869 2721 15 2902 8605 5147 6670 7947 8606 6057 766 2844 6895 765 3591 800 5350 6252 3650 8607 2774 5062 2928 4961 2897 813 2780 1718 704 3064 3323 8608 794 1018 773 5173 4331 1543 5234 685 8609 8610 3678 5351 2012 8611 6827 8612 3055 4933 689 3309 8613 4946 8614 8615 5020 8616 4976 8617 8618 798 1627 2735 8619 2170 8620 3251 8621 8622 8623 5041 8624 8625 8626 7595 8627 2175 8628 5666 843 5188 6861 2770 8629 8406 5148 3536 5868 2845 2961 5845 2725 8630 3700 3312 1531 2015 8413 3683 8631 8632 3807 6050 8018 8633 6954 8634 3604 8635 2906 795 7333 7147 8636 5319 666 4947 8313 8637 3645 2751 4952 3817 5496 8318 2809 2753 8638 8639 2904 8640 5176 8641 8642 1536 8278 8643 4802 8644 8645 3129 8646 6891 8647 8648 3245 4162 8649 8650 762 8329 8419 4991 6628 6655 6198 3783 7314 8651 8652 8653 8654 2736 8655 1015 8417 8656 8657 4301 4998 2799 8658 8659 8660 4094 3612 8661 8321 3649 8662 8279 8663 5322 2808 8336 8664 7390 790 6038 776 8665 8666 8412 8434 2182 8667 8668 8669 8670 8671 8672 8673 4511 8323 8674 5175 8675 8676 5276 7762 8677 5024 4999 8678 8679 8680 1529 8681 8682 8683 8684 8685 8686 6033 8687 7643 8688 3133 8689 8690 8691 8692 8693 8694 8695 8696
349 7573 2815 1445 1551 5359 2826 3570 7341 3413 2199 1837 8197 2096 13 3048 1717 6652 3489 8697 7324 5227 8698 648 786 8699 8700 2801 714
350 2785 4928 3539 5829 708 821 2787 701 845 713 729 703 1028 8701 8702 8145 1011 4557 8703 1029
351 5792 4272 5235 8704 843 4275 3317 697 3046 860 729 8705 3305 5692 8626 3632 5155 8706 7652 8314 3418 4502 657 2782 4979 8707
352 4459 4537 1440 4122 6948 6130 3506 8708 2038 8709 3739 1465 2125 8710 5453 8711 8712 2249 1176 2056 5614 5514 2133 2231 2124 4874 7555 1894 5778 8713 8714 7750 7785 5075 8715 1816 8716 2258 2320 4186 8717 7513 8718 2310 7394 1809 8719 8720 2008 1840 5118 1833 3733 1985 8721 8722 5127 1842 8723 8724 2301 8725 1917 4343 8726 3260 8727 1977 4257 4353 1862 2159 8728 3367 4137 1199 8729 1164 1923 5814 2454 8730 8731 8732 1871 3460 8733 2156 7258 3217 2273 2161 8734 3702 8735 8736 2506 3455 7744 4261 8737 2230 2288 1110 2211 2087 2260 3708 5801 685 8738 1827 2065 6841 8739 2204 1814 8740 5083 1188 1904 1478 8741 5485 4120 8260 8742 1893 2436 8743 2027 4879 8744 2295 4133 8745 6676 6170 2224 1872 8746 2927 2806 2283 2419 8747 8748
353 6719 6819 4101 981 4979 1016 4980 3349 860 769 762 2897 6883 8749 743 8294 1018 2733 8556 87 2014 688 2019 8750 8751 8341 3510 8752 5072 3309 8753 8754 3051 3760 69 8755 855 3245 8756 3430 3667 8757 8318 8758 4237 4280 665 6654
354 1143 1091 1064 1556 4882 781 893 662 1046 1057 1195 1054 1189 5567 4601 1596 1087 2077 4567 1170
355 8759 4020 6574 659 1069 4522 6306 1133 6104 8760 6241 8257 4022 8267 929 7899 1136 8761 8762 7901 2682 2701 2548 8152 6922 8763 8764 4411 6308 1336 8765 8766 8767 8768 8769 8770 5228 8771 8772 8773 8774 8775 8776 1135 8538 7159 7009 8777 1518 1474 1134 4035 8778 2678 7167 8779 8780 1590 4030 1100 1129 8781 8782 6391 5238 8783 4029 7623 1249 4028 1904 7909 7882 7105 1619 8784 8785 1056 4170 8786 8787 8788 909 7570 2172 2160 8 3497 7041 2677 8789 8790 2378 3286 1595 7161 4472 8791 4667 8792 6397 8793 8794 8795 8796 3744 898 8797 8798 1053 2461 8799 7092 8800 8801 1500 4519 1256 2126 8802 3735 8803 5483 8804 8805 8806 8807 8808 3723 3371 8809 5485 8810 8811 8812 782 2579 1560 8813 2242 1044 5465 8814 8815 1827 7177 1721 4 8816 2602 8817 8818 8819 8820 8821 7111 8191 660 8822 8823 2604 8824 8347 4369 1579 8825 8826 7062 7131 4021 7126 7786 8827 6476 1967 8828 8829 8830 8831 2554 7489 5100 8832 8074 1094 8833 8834 8835 6982 7019 888 8836 1970 2064 8837 1084 2632 8838 2365 8839 8840 4337 4648 4543 5596 8841 8842 8843 8844 8845 2262 1997 1661 2413 8846 4372 8847 8848 7910 7557 8849 8850 8851 8852 5190 8853 8854 8855 6621 8856 1696 8857 8858 6489 8859 8860 8861 8862 8863 8864 8865 8866 6168 2058 8867 8868
356 1721 1089 1426 1811 8869 3414 1196 2140 2206 4135 1985 2141 4104 3269 5812 1323 6223
357 783 4657 2897 1626 2936 852 2887 6719 738 3045 2800 2741 8287 3055 2902 1003 762 3600 2927 2725 6144 4301 773 6715 3253 5270 15 2706 2771 4995 3584 3167 1826 2023 4284 1015 4162 8232 2768 772
358 743 738 3605 4304 3506 8870 8871 4557 8872 8873 8144 8874 1013 8875 8876 8877 6325
359 6719 8878 868 3137 300 5419 1766 1776 4190 1426 2337 2077 8879 8880 8881 4149 8882 8883 2491 7255 2319 8884 8885 8886 7395 8887 642 3112 625 8888 628 1759 8889 8447 8890 8891 8892 3275 8893 8894 5767 5781 2640 8895 8896 8897 5016 8898 3340 5255 1640 2497 4583 1385 4031 1030 8899 1805 1051 2517 8900 2192 1984 8901 1638 8902 786 3367 8903 8904 6214 6231 1663 1196 760 4451 4212 8905 8194 6892 2191 3121 4685 5815 3218 1985 2526 2226 8906 1460 8907 635 2259 8908 7977 8909 8910 6383 1317 5745 8911 8912 13 1116 4300 1812 3457 7645 8550 8913 8914 8915 7578 8916 1561 5733 2202 8917 7273 2089 2334 8918 8919 1336 3335 5775 1661 4422 8920 4168 812 1535 6271 1718 2445 3342 7971 8921 3453 1567 6181 4443 8922 1837 6097 6999 2680 8923 4132 8924 766 8925 96 1995 1031 1145 2687 7038 1240 1133 2093 8472 5630 8926 8927 8928 6247 1467 1333 2511 4032 1960 7786 1189 5823 7667 8929 8930 1334 8931 3508 5074 7879 704 1852 6648 8932 1682 8933 8934 1624 8935 7470 1432 8936 8937 8938 8939 8940 7902 2699 2550 8564 8941 1251 5468 8942 8943 8267 8944 8945 8946 8947 1600 8948 3234 1810 8949 5491 3559 4979 7176 4543 8950 1542 8951 765 7436 2708 6022 4360 8952 1216 8216 1876 8953 4555 8954 5773 8955 5737 3294 8956 6026 8957 8958 1109 3684 5799 7548 3168 3065 2889 2303 1130 8959 1925 930 1981 8960 2835 2877 8355 6216 6167 803 8961 3230 8962 8963 1965 6242 2008 8964 2722 3614 7312 3077 2162 8965
360 3504 692 8966 8967 3568 8968 8969 8970 6829 8398 3603 8312 3613 5055 8971 3576 8972 6861 8973 6020 8598 2875 6901 8974 7722 8975 8976 7811 3502 8977 5062 3132 3075 2857 8978 8979 8635 8980 2879 689 8981 8982 3555 5703 3649 5063 6027 7046 3566 4965 800 6931 2897 8983 8984 5278 8985 8986 8987 8988 724 8989 3700 6576
361 1563 6082 1804 1820 4024 8220 8990 5640 7355 3722 4182 2297 1117 6406 8991 2330 8992 8993 7987 8994 8188 8995 8996 6419 5452 8997 5254 8998 4571 1566 8999 9000 9001 9002 9003 1046 4299 5121 4646 1413 9004 9005 9006 6432 1111 5592 4392 4633 9007 8255 9008 7057 9009 9010 8225 4032 9011 3267 6393 778
362 814 3541 1547 709 721 2808 4588 9012 5685 9013 3574 768 4330 8704 737 8634
363 4220 4554 1129 1812 1639 4433 9014 5514 1221 5784 1618 1721 5731 1054 1564 2162 6614 1143 1569 799 7548 2910 1839 6184 1045 1130 1095 781 1191 3273 2680 7251 1043 1843 4209 9015 1870 5218 914 1189 1247 5736 7786 4 1133 1090 1031 3335 6170 8558 7 7191 1936 4112 929 6997 888 7922 6166 5227
364 669 826 7700 1169 9016 9017 1034 1053 5569 2550 5465 1255 1590 9018 2548 4608 7174 9019 9020 2021 1089 4178 2302 6995 7070 9021 7153 9022 7159 4621 9023 2039 1917 1661 9024 4387 6381
365 1176 1053 1474 1240 1174 6174 9025 9026 9027 4359 1244 1462 1242 7770 1496 9028
366 807 770 662 821 8 657 810 710 2637 2925 3483 2726 4280 1716 1682 2710 652 1541 1941 656 0 8697 771 8629 9029 2771 665 69 3356 2813 2721
367 744 9030 9031 5892 5901 6589 8521 9032 5886 3207 5884 9033 3206 6282 3444 758 9034 9035 9036 9037 3838 9038 9039 3836 6299 9040 9041 7928
368 9030 6316 9031 3442 6311 5879 9042 6303 3208 744 5884 9043 5881 5901 6332 9044 3214 9045 2655 5883 5886 745 2645 3445 748 624 9046 9047 3209 6590 9048 9049
369 3507 3495 669 8 698 710 3423 738 2866 9050 92 7745 665 711 764 703 821 4241 3083 7956 7544 9051 5905 1005 1709 3131 2637
370 8 981 649 3167 4994 3132 3489 2955 13 2050 1156 9052 9053 7 6693 5468 9054 6939 1089 1099 2680 6246 8712 7902 1111 9055 659 1661 1069 2093 4137 2434
371 3083 737 77 1717 4546 1529 1721 7936 780 4280 1941 801 720 729 5876 5819 9056 9057 8240 5807 1812 930 929 9058 9059 3352 3353 9060 2737
372 1125 1696 1176 8201 2684 4465 1473 7803 2354 5190 5610 2686 6565 6104 2680 2108 4365 2125 1239 3820 9061 9062 1516 1134 6465 9063 4339 1330 9064
373 9065 9066 2025 2082 6484 7878 3129 9067 3046 5906 5375 9068 4398 6207 6414 9000 9069 8887 4336 9070
374 2 3397 3387 940 3390 3405 938 5184 5261 952 3388 3394 943 4050 8508 932 9071 3399 3403 4039 953 3411 3391 5263 8122 3386 951 949 9072 941 3352 3146 3412 9073 936 1010 9074 9075 9076 9077 9078 4557 9079 9080 3849 717 4702 9081 9082 9083 9084 9085
375 5534 1065 4631 661 1076 4516 1040 893 1052 5203 5517 5817 3268 3823 4612 1056 1604 3278
376 3332 4244 693 2772 9086 4301 6120 96 8 2794 1628 666 624 712 5329 752 8521 1541 2826 2760 9087 1540 8038 766 2791 6156 92 722 4331 9088 5869 87
377 710 96 5004 2877 2757 2794 2785 810 1443 2760 2754 649 11 2720 1546 9089 670 3483 82 721 2738 1532
378 783 868 6197 2718 6652 6819 3483 2929 3489 87 1540 4586 2726 1535 4860 9090
379 4 1203 1052 4631 1076 1170 5206 778 9091 6665 6223 1395 6260 1721 2044 1062 1064 5567 1566 4611 7 3266 5539 5785 1189 6997 1050 888 1596 3823 780 9092 1928 5534 6975 9093 1556 1578 9094 5207 781 893 8475 9095 5517 1202 1611 5576 2131 5221 1198 5238 1833 1042 764 9096 4209 9097 3750 9098 659 8360 1227 1087 5529 1615 4516 4621 5524 5193 1098 1065 661 7625
380 666 2718 2831 7573 9099 8576 6020 737 2017 9100 6708 3488 3555 7079 9101 703 3594 2849 3072 9102 6061 9103 2859 4586 4979 9104 8294 7979 9105 2782 2895 5654 9106 5285 9107 8293 6752 3502 9108 9109 8411 2786 4932 9110 8412
381 3241 3083 3525 7864 3622 7431 696 4278 9111 1860 4927 5019 5345 844 3610 6252 5342 4894 9112 9113 7706 7718 8527 9114 69 1015 9115 3794 855 9116 9117 5051 5500 9118 9119 7739 9120 9121 7867 3544 4078 2834 3129 8277 2831 3281 9122 867 9123 1941 5010 4791 7323 9124 9125 9126 6109 5709 9127 7350 9128 4789 9129 699 710 4919 9130 5012 5412 3124 5868 8403 9131 4492 9132 9133 7956 6737 9134 713 1940 7289 9135 9136 7702 3591 704 2732 9137 6781 3643 9138 3787 9139 9140 9141 9142 9143 3524 2865 3418 3502 697 88 9144 4494 6976 3077 9145 7022 9146 9147 9148 9149 6960 9150 3598 760 6836 2640 6848 9151 4709 868 9152 9153 9154 7645 9155 3533 3308 4865 7981 9156 9157 9158 2860 2825 6881 9159 6768 9160 9161 9162 7033 3636 7247 5050 8295 852 3691 9163 6865 7962 3291 9164 6729 6761 9165 9166 3555 9167 7434 786 9168 9169 8578 6831 9170 9171 3489 2835 9172 3602 6978 3686 5069 9173 5014 9174 9175 6136 9176 2844 9177 9178 9179 6948 9180 9181 9182 9183 9184 9185 0 9186 3530
382 4576 3557 2891 843 3773 9187 3680 9188 3777 3590 9189 7221 3684 9190 9191 7433 8293 9192 9193 6042 9194 7811 3800 9195 9196 9197 8287 2895 3596 2020 2706 8341 2175 7828 6786 776 9198 9199 9200 9201 9202 9203 9204 9205 648 6719 6753 8424 3545 5354 7587 9206
383 4016 1065 1138 3266 1043 2974 1393 1146 1057 1056 9207 1141 5542 4471 7191 4515 1388 1098 2973 1624 2684 4875 1406 909 1477 9208 3702 7770 7826 1152 1449 1109 1712 1394 779 1645 3742 1378 8574 1046 4183 892 1254 1324 6247 1401 10 4435 3268 1198 4299 1598 2037 7204 1137 9209 1387 1130 1134 4072 1425 3733 1971 4346 1414 4036 9210 6290 1143 4215 1939 2096 4528 4870 2199 4376
384 6128 9211 4959 5675 5069 9212 4939 762 5345 3552 5342 90 2831 6124 7646 9213 9214 3612 9215 4091 9216 5349 8972 9217 5009 3626 9218 9219 4087 3572 9220 6736 4915 3767 3763 3563
385 743 2020 2797 821 2748 786 8038 1445 981 2742 3167 2774 3133 6159 1015 649 2937 9221 9222 3248
386 1112 9223 929 5640 1810 1322 4375 1127 2259 5108 5769 5091 1647 4548 1971 1429 3702 6097
387 16 4711 7596 656 1540 2179 0 649 711 3423 2814 710 3129 3539 2741 3605 6385 9224 2803 3651
388 1051 9095 1373 2131 1085 5817 4121 2568 4116 1567 1202 1048 1410 4418 3287 3823 4613 1960 9225 4134 1031 5221 2127 5208 3738 4195 1463 1563 3266 9093 7283 4261 4516 6232 1185 7619 8176 5546 8475 1887 7 2617 1564 5193 2542 1611 1848 1622 3278 1568 1591 4265 1892 5805 9226 4131 4354 2191 1121 5603 1230 4117 929 5209 2259 1203 4540 5452 3335 3542 1566 1379 1076 7966 9227 1578 780 1040 5128 1613 2466 1624 1052 779
389 1229 1563 1373 1031 1146 4180 1604 1410 4358 1134 4179 6098 1104 1621 9228 1317 1414 1389 4114 4364 904 1375 9229 4462 1033 1379 1148 1490 1485 7784 4626 4548 4472 4215 1837 5362 2036 4158 2033 4385 1406 1237 4399 4482 5517 9230 1645 4341 1168 2916 1421 1426
390 9231 8284 5669 9232 4078 5342 3573 7710 4898 9233 9234 6126 4091 3502 3572 9235 2826 7809 3059 9236 5012 9215 9237 5278 6733 1050 3287 9238 661 3626 8740 7176 1043 2830 2882 9239 9240 9104 2901 2842 7890 2715 4501 2883 4511 7810 9241 3313 9242 2899 3063 3640 3579 9243 4590 5271 6202 9244 4943 9245 4919 9246 9247 6738 9248 3647 9249 2179 9250 8633 783 7873 9251 6799 6119 4917 3300 1529 762 7652 4585 9252 3792 9253 7818 9254 6032 4796 6899 9255 4304 9256 4938 9257 653 9258 5172 8314 9259 9260 2804 5002 9261 9262 7247 9263 7235 9264 9265 8714 1057 1385 2216 9266 9267 3077 9268 3065 8502 4979 3081 9269 9270 5387 5383 9213 8346 8415 9271 9272 792 9273 3317 3583 4303 9274 9275 9276 2904 7815 9277 4081 9278 3811 9279 3777 9280 9281 9282 9283 9284 9285 9286 9287 9288 9289 9290 2885 9291
391 9292 9293 9294 2645 9295 9296 9297 9298 6310 5896 9299 752 5879 7928 9300 9301 9302 3447 2646 9303 9036 4065 3837 6282 9304 7855 9305 754 6303 9048 2656 9043 3210 757 9049 7843 9306 9045 9307 9308 9309 5890 8090 4066 9310 5883 6316
392 4876 4343 799 3702 1645 1075 1141 803 4484 7199 1112 4128 4197 1375 4183 7540 9311 1377 4108 1799 4364 1129 1104 1391 4405 1189 1598 2255
393 3512 694 816 1055 9011 4365 783 9312 657 5794 4304 7713 2834 3506 4653 3261 4435 4167 5148 4168 3513 654 9313 1069 1254 811 3279 3484
394 1426 2246 1190 5215 6932 782 799 1056 4384 2542 3740 7060 9314 2631 8987 9098 3286 3742 1050 6695 9054 1057 1195 9315 8219 9316 2025 9317 1203 9318 7086 6165 7184 1042 2222 9319 1967 7103 6309 6222 2271 1209 8354 5468 6218 7909 5194 1604 1459 1084 1180 1560 1187 9320 6168 6 8810 1238 781 1448 7157
395 4189 4602 9321 9322 1571 9323 5817 6393 3268 4501 96 68 2926 4330 768 6717 8531 4530 4514 6204 2727 9324 9325 8650 2714 3277 868 9326 9327 9328 4168 9329 9330 9331 9332 9333 6557 1504 9334 1472 9335 9336 8807 3828 9337 9338 9339 9340 4653 9341 9342 9343 9344 9345 9346
396 1383 1645 4114 1111 799 1089 1983 1119 1118 1596 1152 803 1323 3266 1126 3751 4217 4197 1604 1060 1660 3287 1112 1091 1090 1401 3425 4 1336 1653 1189 8574 1318 1109 1490 4177 7203 2687 4348 4128 2199 1034 1393 1561 2911 3050 1377 3048 6225 5514 1106 2037 1654 1056 1045 1971 4270 4395 1647 2680 904 1145 4360 1931 6247 1072 2462 5750 3234 2822 4195 1657 1059 4561 1624 1143 1952 1568 1447
397 2820 827 9347 9348 4685 769 1004 12 731 2737 6717 2733 2637 11 2818 813 710 1045
398 4134 2320 1838 1228 1463 9349 5192 3446 9350 4118 9351 2661 1051 6315 7843 9352 4114 1737 1183 8176 1848 9353 1613 5813 4131 4540 9354 9355 5885 9356 7927 624 5892
399 9357 7038 4417 8254 1093 1571 1246 8762 7092 9358 9359 1384 9360 9361 1585 9362 9363 3286 4453
400 4900 7215 4910 9364 3290 3524 9365 9366 3625 9367 786 9368 9369 5271 7715 9370 703 4796 5488 5001 4904 7413 3552 9211 3544 9371 8972 4919 6141 7811 7806 3574 7646 1015 9372 3526 5057 9373 817 4278
401 1620 9374 9375 9376 9377 5208 1202 9378 6434 3725 4463 8994 9379 1568 9380 2610 4608 1060 9381 4585 9382 9383 9384 8997 4399 1076 1413 9385 9386 6452
402 1158 1143 1065 1031 2678 9387 1091 1170 1135 9388 1223 4178 3507 4992 710 67 730 8 75 649 762 811 1548 693 768 4310 2179 4899 3282 8206 2014 7585 2725 3277 4284 1446
403 682 4995 84 93 1711 731 3701 4161 81 3247 92 811 819 8700 786 666 2012 9389 868 4284 13 9390 2823 4981 2902
404 9391 7688 2910 9392 4546 4178 4035 9393 6133 7073 7031 9394 1043 6204 3414 1088 9395 9396 9397 9398 9399 1797 9400 1046 2835 2742 737 9401 710 2826 722 1541 2014 711 813 1548 1937 704 3629 9402 2733 1826 665
405 9403 1724 1286 9404 1302 1281 8441 1289 3096 632 9405 1288 1306 5450 1357 1343 646 1750 1794 5445
406 636 9037 4070 3208 9406 9407 9408 9409 9410 9411 9030 3438 9412 9413 8106 9042
407 3340 2320 1966 3227 5734 9414 1638 9415 9416 709 4263 1115 7302 4398 3740 9417 9418 6568 9419 4300 2192 9420 2202 4157 3236 7968 5736 4405 3275 1996 3726 5776 9421 5772 2052 9422 7966 2045 9423 7398 4338 1162 9424 1803 4224 3294 9425 8909 8201 1388 2632 4104 8900 1109 1439 7965 9426 9427 9428 9429 6699 9430 1927 4408 1145 9431 9432 9433 1696 8742 9434 9435 9436 9437 7562 9438 9439 5787 1031 9440 9441 8945 9442 3223 1869 1854 1981 3335 7557 9443 8953 1953 1862 9444 5737 8895 7477 9445 5771 2200 1886 2079 8557 3457 9446 9447 1946 9448 9449 9450 5788 9451 2326 6216 9452 1847 8880 9453 9454 9455 9456 9457 5812 2428 2272 2389 9458 9459 1176 2531 9460 5452 2602 2525 8558 2350 1982 9461 8892 9462 9463 1090 2352 1569 1261 9464 2533 9465 9466 2224 9467
408 8195 2684 9468 4649 4031 4606 6075 1336 9469 2255 5580 4024 9470 1094 6678 899 1109 4628 9471 4419 9472 7206 9473 6404
409 77 648 6252 2734 698 1532 92 4862 70 669 2926 720 9474 2892 1001 783 3487 4657 709 2959 2179 6197 1682 3518 2866 2814 981 5490 737
410 1378 4200 1652 1136 4207 5469 7799 1613 7197 2620 4388 7802 9475 1187 4114 1848 2584 1109 4339 1455 2099 1464 1467 6245
411 5790 2357 2568 2511 2484 9476 9477 5642 8909 2607 8351 7752 2025 4203 1956 9478 1114 3726 1861 9479 9480 5774 9481 3218
412 786 821 675 9402 845 5188 7840 4685 7927 3206 7928 624 9482 9483 4686 2896 9393 9484 9485 9486 300 9487 9488 9489 5318 814
413 2749 8 2948 3426 3167 2961 87 688 652 3248 657 1717 3524 1549 737 4589 649 6717 3489 1718 1534 2179 6199 3760 9490 11 806 69 4308 6652 5231 2767 4384 5610 89 4707 9389 7337 981 813 868 5156 6159 12 2760 1540 8628 765 2902
414 807 652 69 3495 2772 1528 2736 3490 7978 3083 5493 2930 2942 4500 2785 2756 8064 2815 2804 2796
415 9368 4927 729 842 5691 4900 2882 3500 703 9365 2641 3544 9491 9492 5491 4917 6726 3356 9493
416 4164 0 721 87 761 9494 9495 3489 9496 784 1716 5020 12 737 3788 665 786 6652 9497 9498 731 2014 9499 1717 9500 9501 688 2781 9490 773 9502
417 827 981 4990 3167 9224 4711 4585 4859 5504 2014 824 2720 5905 9503 657 3593 4577 1853 9504 721 7871 9505 9506 4791 5012 1937 5049 715 93 9507 3629 3688 1530
418 9508 9509 4821 503 9510 4827 9511 5995 4742 9512 5990 9513 9514 1794 5550 9515 9516 25 9517 5966 9518 36 9519 9520 5958 8073 3032
419 657 821 710 5108 925 1422 7751 1318 4283 9521 5116 904 9522 1846 1428 1378 3832 1226 6218 9400 10 9523 9524 9525 491 9526
420 87 3281 9527 9528 3859 3189 9529 96 82 16 2759 1005 9530 7409 2317 9531
421 1696 8201 2206 7176 9532 9533 7276 6383 8466 9534 9535 4264 9536 8475 1694 8953 1119 9537 9538 9539
422 1129 1965 1331 2206 4200 4383 2320 1955 8891 4137 4199 1805 1995 4270 5806 2584 2096 4139 4140 1051 1889 1939 1050 8184 8181 2056 2154 1471
423 2734 770 2749 762 4332 2783 2842 6753 5063 3514 846 2927 8282 9540 5058 4305 4581 3615 811 3064 3651 2894 3691 855 9171 6049 7313 2870 729 3647 6036 703 2895 1534 2774 2846 3313 6781 2899 3320 2904 3592 2725 5356 3768 6927 5061 3323 6136 727 3626 3620 5271 6729 6148 2868 7722 8284 2898 9541 9240 5012 9542 6945 3063 6015 4500 9543 6203 3690 776 2715 2763 3045 2851 5704 7980 1533 2786 1683 2968 2781 2835 9544 4083 2780 3300 3695 3777 2807 8636 6037 9545 5493 5018 2014 3305 9252 9546 9547 2785 1933 1018 2804 2826 2792 1015 2944 9548 5173 2736 9549 4498 1029 9550 3772 9551 8413 5172 2821 2799 6042 2017 4896 9552 5876 8396 9553 3312 5328 8634 2838 8342 9554 5322 9555 9556 8645 8417 792 9557 8321 2775 9558 798 9559 6057 8668 2179 9560 8012 5026 9561 2640 8412 9562 9563 3253 9564 653 6784 9565 3804 8329 8690 2787 9566 5181 9567 9568 8433 807 8403 9569 2709 3625 9570 9571 9572 9573 9574 9575 4502 6659 9576 9577 9578 9579 9580 9581 4964 9582 3784 9583 2832 2859 9584 9585 9586
424 816 2785 669 3131 731 75 4914 2737 711 2019 868 7742 2179 87 1685 721
425 1143 1051 2333 7914 3714 9587 799 4207 1406 3832 6234 1187 1112 9588 1387 4103 1198 1473
426 6013 4889 9509 9589 9590 9591 204 420 5953 153 4809 457 3004 3029 9592 275 9593 383 9594 9595 9596 427 9597 9598 485 4806 142 306 9599 9600 4808 468 222 9601 8072 9602 9603 9604 232 251 5927 4820 294 9605 9606 9607 9608 231
427 4164 69 0 4244 6134 2794 2927 4501 7875 2718 710 769 649 5679 1853 4083
428 807 783 2709 710 4007 9609 9610 3129 77 11 1003 1004 2643 3908 9611 2815
429 1255 1051 1053 5202 9612 1385 1139 1104 1389 1463 1965 1149 4383 1031 1258 4117 2274 1995 1220 4132 1075 7394 4197 1152 1645 1055 4131 4396 2033 1804 799 5786 4398 1406 2338 2509 1923
430 3340 5219 5772 1966 5736 1838 6606 9613 1205 6221 1584 1555 9614 3216 1980 8903 5807 300 9615
431 1736 5409 646 1739 1757 1360 5408 1299 632 9616 1351 1794 640 1298 7729 9617 9618 9619 8523 9031 5901 6347 8166 9620
432 8172 0 1546 2729 738 5504 5870 28 9621 1717 2643 652 4863 2767 722 2725 2734 69 2017 2817 11 711 92 731 710 12 737 2022 771 2815 9505 6877 82 6109 1853 2812 3247 3069 696 6253 2020 6732 9622 2806 666 8063 2782 813 2772 2726 2012 4981 2940 7608 2775 665 2820 2737 1685 1541 655 827 2742 90 709 2786 2759 1716 2800 77 2014 821 9623 81 2935 656 2787 776 774 7984 694 2902 9624 8
433 7548 5735 1639 4128 1040 5219 4168 5518 799 2330 4882 9414 5772 5362 1031 1109 6215 1129 2162 2911 6091 6389 4426 9463 4134 1230 2605 1393 1085 4160 6162 1102 1049 5238 2559 1331 4443 1373 1239 1952 4463 3275 9625 1117 9626 7193 9627 1057 9226 1142 4144 9628 1859 4267 9093 1848 3338 4541 7566 1054 3839 1471 2255 1152 9629 8563 904 9630 9631 9632 1459
434 665 5332 9633 9634 9635 3898 9636 4771 9637 9638 9639 9640 3918 8876 9641 9642 9643 9644
435 5554 9645 471 4820 39 9646 19 5975 4814 4813 9647 353 5916 30 9648 4831 5549 4816 4832 2978 3011 51 5915 472 4808 5917 203 4806
436 1043 3269 3750 1203 1928 6684 1510 5517 1604 1051 5831 4 6665 5524 5203 1187 1611 1040 1128 1614 5784 1143 9649 7 1065 4887 1056 3741 1229 8188 2259 9650 5548 1624 1076 1721 1183 4516 1615 4621 1848 1048 5537 9651 6165 1418 1180 5461 1592 2380 9652 5776 1141 4994 3266 1142 4444 1111 4396 1397 3260 1563 1050 1399 4125 4399 1119 9653 4121 2303 4269 1553 1564 1033 4477 4612 3287 7485 1596 1160 1138 1379 1060 4250 6693 2036 4265 1828 6685 7394 9654 1426 799 3715 1127 1221 4072 2026 2910 1202 2199 5576 3050 2236 2021 1123 3273 4114 5469 9655 2096 661 4113 6635 9656 4566 1218 2044 1089 9657 1581 4515 13 1031 4539 5114 7121 4136 9658 9659 4170 3839 1098 1651 778 1833 4193 9660 1176 9661 1400 9662 4229 1105 5539 3456 1620 5094 9095 1189 1227 9018 3262 1410 1204 1993 2246 5534 5208 6246 1463 1226 781 4467 660 9663 7561 6 4128 7038 9664 2682 9311 9665 1057 4526 1377 1044 893 1384 2273 1407 7786 2685 2684 1002 4149 901 1830 9666 1707 2043 1795 4996 7966 8197 1037 774 8236 1251 1423 7084 9667 9668 8272 1851 9669 1432 1918 9670 657 918 1449 9671 9672 9673 7043 2127 2034 3361 9674 1415 7616 9612 9675 4102 9676
437 1634 1056 1170 1195 9677 4022 1561 1660 7901 1621 8810 1645 3748 1131 8236 6583 4490 2222 6232 3740 1103 901 2467
438 1192 1640 9678 9679 1601 9680 1124 1075 9681 2037 4892 5538 6175 4563 4429 3747 7203 1143 4547 1556 9682 7117 5910 6168 8192 5221 8194 9683 9684 911 1054 1649 4269 1561 1398 4548 9685 1115 8189 2684 1077 7251 1074 1145 8964 1324 6169 1646 8787 4474 9686 5583 2226 2127 3733 3703 3748 9687 8747 1660 5528 5100 9688 1031 4471 1165 3839 1163 2931 4441 6112 4196 8740 1125 3745 5605 2191 4259 5105 9689 1234 9690 9691 3746 1079 9094 2021 1135 9692 2677 8202 7908 8788 1065 5237 4406 9693 9694 1952 1117 1442 2025 781 7186 9695 7121 1109 2678 5585 8856 1072 2683 5750 1045 1158 5613 7910 1061 8810 1116 4144 9696 8190 1657 1108 9697 904 1170 9397 6688 1439 4020 5471 4621 5238 1385 5907 7156 4022 4439 4030 2737 1001 2925 1172 1327 4035 1050 92 1391 9698 9699 6230 5590 9663 919 2738 2754 1060 5833 659 1378 1903 1570 909 9700 1086 5830 9701 7091 9702 3753 9703 9704 3285 4483 1112 2680 1553 1189 1142 1837 9705 5577 2033 5222 8142 9706 6164 9707 1090 4488 1594 4443 4643 9708 1471 1073 1126 2222 8257 6237 1121 9709 9710 4893 1221 9711 8268 7786 6 1110 9712 2072 6236 9713 9714 9715 4015 8229 2313 6177 6308 2681 1157 9716 2405 4270 1080 2410 7176 9717 9718 7899 1111 9719 9720 9721 5468 4143 9722 9723 1619 1566 8248 890 2618 1119 1104 7485 1661 8222 1659 1818 7105 9664 5095 9724 1460 1187 9725 3140 1376 4193 1336 9726 4132 5199 3264 898 9727 4220 4168 9628 1624 9728 803 9729 1056 4572 1114 660 2688 929 4219 9730 2699 9731 2466 4473 3751 9732 9677 1425 1330 1242 9733 1098 1558 1240 8235 2702 6232 4546 5465 9734 9735 1579 1761 8236 1469 1617 4463 1195 2701 1979 9736 2685 7002 1249 2700 9737 6241 7019 1465 5839 1058 4257 8267 7006 6181 9324 6955 7195 1044 910 5837 5581 9738 1247 3750 9739 1244 4628 1472 8271 2682 9740 1078 2822 1597 1902 1046 2391 1176 1468 7944 4435 9020 9741 3371 9742 9743 1063 4634 9744 2593 661 5805 2559 1616 1329 1959 9745 7038 9746 8188 9747 1026 1623 8364 1715 7804 9748 1138 6482 9749 1420 8182 8946 8560 9750 3306 9751 685 6038 7463 2042 1062 1908 7258 9752 2686 1481 9753 8963 9754 1898 9471 9755 1972 9756 1828 1255 9757 1462 9758 9759 9760 3695 6974 1070 1141 6609 3493 9761 9762 760 9763 1257 5227 1380 9764 1102 300 9511 9765 9766 4886 4339 1089 1201 1232 6290 7190 9767 6176 1194 1103 13 7211 9768 4183 1997 7111 8355 1259 4387 1656 3287 9054 1953 3741 9769 7827 9770 1223 6686 2704 9771 1175 9772 5117 5540 1910 6922 8241 9773 4102 9774 3348 3737 901 5487 9775 1042 7759 9776 5620 9777 7901 9778 9779 1631 6174 1552 9780 7460 8455 9781 9782 1256 2705 9783 4331 15 5617 4 4570 9784 7202 1596 1518 9785 9786 1082 9787 2703 5445 3126 1084 3230 4543 1429 9788 4484 9789 8799 5477 774 3068 2761 4328 924 8404 2050 9790 2414 7504 9791 189 9792 4234 9793 8207 9794 3347 9795 1057 1992 897 9796 9797 10 2463 9798 4327 9799 9800 2239 6636 4178 9801 9802 9803 9470 7793 9804 8806 9805 1721 8369 2172 1140 9806 9807 9808 9809 5207 9810 1251 9811 7490 9812 9813 9814 2171 9815 9816 8845 5097 3272 7506 1901 1621 5475 6463 9817 9818 9819 9820 7098 9821 7631 9822 9823 9824 9825 9826 6431 8358 4138 7062 9827 5589 9828 9829 9830 2617 7765 9831 9832 3740 2604 9833 8836 9834 4319 9835 9836 6306 9837 9838 9839 9840 780
439 709 852 2927 3083 2754 4325 8856 6222 8712 2804 2808 2017 776 8 762 665 6053
440 1225 1219 1839 9841 3823 1832 1876 1812 1965 2063 4349 1146 7618 6587 1026 7122 4117
441 1143 1053 1130 1065 4339 1149 1241 4560 1378 4158 4183 1110 1057 2822 1046 904 10 4182
442 598 9842 592 991 578 620 4680 4843 9485 4693 566 4690 835 840 563 576 4673 4698 6064 3092 612
443 6677 9843 6564 4614 9844 9469 4633 4345 6469 4181 4366 9845 9846 4216 5076 5732 4405 4223 9847 9848 786 4608 13 6675 9849 1330
444 4611 1084 4414 9850 2914 4513 9851 5008 9852 9358 9853 3746 1436 9854 9855 1473 5752 2126 9856 922 4106 7941 9857 1482 4468 8825 8735 9858 3744 7011 9859 6415 9860 9017 8786 9683 4415 1431 9861 2172 8919 1487 9862 2631 4483 6405 7506 8747 4018 6393 5087 7354 1604 9863 5750 9864 4178 9865 9866 5517 9867 9756 9868 3710 2613 4661 1521 3717 4334 7907 9869 9870 9871 9872
445 4053 9071 952 4039 944 5185 3387 8508 1541 4996 1003 710 12 9873 8106 9874 5030 9875 9876 9877 8104 8110 8159 9878 5027 2902 9879 8116
446 951 931 4053 932 947 7264 944 3397 949 3402 3403 4056 9880 5259 4052 2 5260 953 4058 936
447 4134 1031 4612 8348 9881 5785 5094 6679 1688 5469 7288 9882 9883 5451 5482 7353 2482 6241 4554 9884 1828
448 3526 7713 7702 7609 6747 9885 2884 4274 6722 5847 1545 5865 8554 2637 9886 9887 9111 6846 783 9888 4894 3759 3503 7861 4791 7722 4924 9889 2879 9890 9891 9892 3616 9893
449 2162 2029 9894 9895 1048 9896 9897 2071 8883 1155 6262 9898 9899 9900 7560 9901 4396 9902 9903 4200 5807 1614 9431 9904 9905 5782 9736 9906 6166 4525 9907 9908 1966 9909 9910 8956 9911 9912 1810 9913
450 9914 311 181 9915 113 5924 496 219 4817 171 165 9646 9916 9917 436 9918 9919 5998 9920 9921 9922 5927 95 233 9923 9924 9925 9926
451 9927 9928 3468 984 579 3467 983 7661 560 596 600 9842 1668 7533 9929 9930 4694 1665 595 5294 9931 9932 586 9933 9934 3472 9935 3470 571 3474 565 9936 5287 9937 9938 9939 991 9940 580 618 9941 9942 9943 2920 9944 1268 2923 5290 9945 9946 9947 9948 9949 9950 8457 3466 9951 5301 9952 578 8047 9953 9954 9955 830 9956 9957 9958 9959 9960 9961 9962 9963 1664 8462 4843 998 9964 9965 5288 9966 9967 8460
452 9508 5916 9968 2978 120 9969 9970 4821 383 4826 221 9971 5944 5994 257 4752 5993 485 3032
453 665 720 1003 2964 81 9090 9972 1860 2014 2720 3423 12 2739 762 2012 2814 8 4497 710 2823
454 855 7829 5012 774 4239 2711 8 2868 9973 3127 722 9974 6909 1543 3701 15 9975 785 4497 7740 3083 741 7307 9976 9977 9978 4577 3069 786 3601 9979 2897 4280 9980 4494 708 5009 9981 723 9982 9983 9984 2808 2791
455 2736 1716 1000 710 2877 649 654 824 1530 2638 81 2927 2815 2713 852 652 727 5656 2777 2734 772 2706 2724 4902 11 3802 2014 1018 3600 773 1540 3605 1003 2801 3245 5319 9985 9575 2799 9986 9987 762 2788 9988 2637 9989 6925 9577
456 6366 4066 9990 9048 9991 9992 3436 9993 4685 1783 9994 8106 8167 6356 6368 6334 6379 9995 6347 9996 9997 9998 9999 6301 10000 6335 8165 10001 10002
457 1111 1928 1058 1069 8359 1639 8216 4519 2700 10003 7901 10004 1851 1104 10005 6433 6922 4323 1053 7491 1050 7571
458 554 835 608 1665 831 618 555 576 10006 4681 581 609 4679 603 586 560 7524 566 4857 2919 557 577 10007 1267 593 615 580 616 4683 606 1669 4689 10008 4690 990 571 3474 595 10009 1666 562 604 839 10010 1313 605 582 4728 10011 4846 4673 575 4691 1311 612 598 4680 10012 619 995 7531 10013 583 10014 587 10015 1681 9483 10016 594 568 574 621 620 4848 10017 5293 10018 6066 4695 4858 573 590 10019 3473 10020 10021 10022 7528 592 10023 3089 553 8048 7662 10024 10025 10026 10027 10028 4852 1266 10029 9955
459 1442 910 1143 1091 1552 10030 4167 10031 7017 1170 5364 1154 1176 4426 6548 6443
460 553 10032 616 592 4854 2921 620 4699 10033 4846 840 565 3476 988 573 596 597 985 10034 3473 581 4150 9927 1270 4695 10035 10036 8460 10037 4848 10018 1271 6641 7522 8056 10038 10039 10040 6637 8049 10041 623 10042 10043 10044 1268 557 586
461 783 788 2760 3585 695 2737 1532 76 81 8528 10045 2742 813 10046 762 2909 2787 10047 774 2774 82 2942 819
462 4164 2709 2733 850 1547 4951 5489 10048 10049 2713 1530 764 827 3426 10050 81 688 981 730 8414 10051 10052 2963 4092 2816 10053
463 4528 1452 8709 1556 1044 7084 10054 1837 4419 2246 8236 3138 9652 9762 10055 9769
464 1540 3490 821 4301 5037 4271 1545 2820 653 2720 4915 4164 5504 11 1000 5353 710 648 7210 2718 762 1005 2179 3767 3763 715
465 1084 5548 1837 1075 4517 1223 1645 1109 3461 10056 1148 1143 10057 10058 7 1138 10059 4881 1439
466 1660 1064 9095 1043 1056 4269 1420 1624 1057 1080 1098 1060 1143 1031 1091 1559 780 1053 4182 2728 9093
467 5153 2836 10060 2179 6719 3590 3537 4947 5656 2902 3555 3647 3783 4303 3686 2012
468 1538 683 760 1711 786 4287 9402 1707 649 654 1551 868 820 3584 814 678 826 3281 7412 4590 3422 1710 5679 2866 7927 636 8572 9992 10061 3206 10062 7843 748 745 10063 704 1696 811 7054 96 3239 688 10064 4496 6628 650 2708 6779
469 4570 2916 5125 10065 911 4608 6569 10066 5086 4532 7751 6681 4488 10067 1504 6241 10068 6971 10069 10070 6410 5473 1576 7210
470 69 82 1718 820 8 649 4183 6652 0 10071 769 2842 2748 2814 6671 1540 2909 4164 704 801 668 8018 2765 1852 3760 6909 9547 10072 4990 10073 2941 92 10074 710 7608 8530 10075 10076 716 10077 4919 6844 4953 10078 3683 10079 3593 10080 701
471 929 4132 10081 1439 1975 10082 1240 10083 10084 1078 1905 4191 2388 5778 10085 2050 10086 5574 9672 10087 6557 6841 10088 1587 10089 10090 4734 10091
472 1420 4403 2974 1116 1141 2684 10092 4375 1640 10093 9809 1373 10094 10095 1513 4193 1166 4349 4398 10096 1065 4158 2069 10097 8355 10098 4444 911 10099 1038 2705 1503
473 721 10100 10101 1414 9094 1108 6662 1234 1377 2679 7777 5114 9736 4158 4484 1438 2462 1460 1512 7199 1045 4531 6634 4267 2682 5217 1097 4514 5197 10102 4876 5462 1245
474 703 7829 848 859 5351 824 1545 654 10103 10104 1685 10105 2887 4165 7056 4492 10106 6274 6146 704 4237 2959 10107 3239 1444 7707 4081 4577 6817 7573 4910 3519 3083 696 3630 10108 5042 3537 736 9086 3701 7544 6018 3082 3245 3777 10109 3814 6708 6384 10110 3650 8280 10111 10112
475 1716 10113 1006 655 695 10114 3504 1024 721 7233 3426 2734 3591 4791 10115 771 12 8587 650 3573
476 10116 10117 2649 5644 10118 1194 5750 10119 10120 624 9992 6368 3206 10121 6315 10122 8355 10123 2156 2330 4112 2048 1255 1973 10124 2147 2434 3371 1702 9225 10125 10126 7549 5734 3219 10127 1518 9794 4555 7976 10128 2312 5604 1698 2466 2009 7276 9736 1442 1109 4443 10129 3221 1995 9471 10130 1960 10131 2000 1805 2700 9796 2121 1203 4481 2514 2218 2607 9727 2063 5096 5473 1524 1887 7023 2252 6502 10132 10133 10134 1589 7473 2224 799 10135 4447 10136 10137 10138 7509 8849 3459 1037 7 6500 10139 1165 4465 3726 10140 1084 10141 2623 7506 10142 8796 10143 1993 10144 10145 2025 1898
477 5892 10146 10147 5899 10148 9044 745 9877 10149 10150 6346 10151 10152 6347 10153 10154 7858 8103 9042 8090 5030 10000 10155 10156 10157 9619 9301
478 764 868 1716 657 5321 3326 4580 1542 693 845 5350 5721 7445 2017 3290 10158 9622 10159 4859 5504 74 4164 1682 3244 80 10160
479 1348 1349 1723 5447 3108 5416 1360 10161 10162 5445 10163 5411 5406 3114 646 10164 1362 10165 10166
480 744 2645 10167 10168 745 10169 6589 3447 3443 10170 9034 8521 10061 8570 9412 3206 4064 10171 4065 9041 10172 10173 10174 6368 3298 10175 10176 10177 10178 10179 10180 10181 10182 9350 10183 10184 10185 6293 10186 3212 10187 10188 10189
481 7981 16 710 2874 10190 3430 2897 9240 3422 2748 2902 4164 3510 1826 3245 10191 4503 5031 10192 8281
482 76 10193 6723 6750 10194 10195 10196 6927 3683 6960 2855 7896 10197 3508 6756 10198 8310 10199 10200 10201 6136 4301 5019 5037 7963 7595 6269 7644 7139 868 9156 6790 3063 10202 10203 10204
483 2908 7838 6351 6374 6287 6380 10205 3980 10206 10207 3918 771 2815 3760 3645 10208
484 3512 4091 3544 860 6709 3592 703 3573 5844 2866 10209 5054 1546 3519 7938 10210 821 4092 708 716 3523 5050 6795 2964 2715 4501 4081 9219 4078 2732 5286 3510 10211 851 10212 719 3591 92 3239 769 3613 3541 4101 6723 6717 3242 3482 6896 6729 9051 3055 739 3645 10213 8707 6017 7138 10214 3601 4979 3505 3691 4237 5046 81 10215 10216 3700 10217 3130 5073 10218 3649 4274 3637 5188 3530 3555 2020 7639 6026 6654 3518 2936 10219 2894 666 10220 2774 7238 4934 7085 3806 6151 10064 10221 3062 3651 733 4247 786 10222 10223 10224 9609 3072 3620 2878 10225 3194 5285 7722 2017 9111 2873 2022 3063 883 3179 3248 7811 10226 3281 722 7440 3618 10227 10228 7308 4935 3563 9189 2803 15 8598 5018
485 3747 1107 1152 1645 3742 5108 1064 3751 1051 1076 6193 1182 1170 3266 1467 10229 1928 3268 5203 9018 5805 6184 1156 1072 1074 1939 4015 10230 5092 1482 1761 1457 6615 4334
486 4897 2826 5148 7431 7949 10231 4969 3502 6723 10232 9104 7432 3642 8659 4913 774 8594 8424 10233 9195 10234 3065 10235 4938 10236 8603 10237 10238 10239 10240 10241
487 1051 1149 1134 1837 10242 2259 10243 3722 5608 1645 1253 4144 4488 1693 1652 1460 7821 9614 1053 2328 1055 3715 4339 3702 1042 4359 5117 7450 4343 7389 1034 1439 2236 1465 2702 1715 1136 894 1142 10244 1451 1394 10245 10246 1891 1488 9025 2005 4139 4474 10247 5111 1647 1384 5838 4128 4412 4401 1143 10248 1248 1171 2405 9210 5202 1255 4183 929 1607 10249 1448 2916 1320 4483 6242 10250 7770 2686 2222 1040 10251 10252 4459 1187 5645 10253 904 8886 1137 1657 1952 10254 1073 7780 10255 4448 1983 1185 9324 5092 10256 7822 2082 1244 781 1458 6234 1478 2911 10257 1383 10258 1646 7008 1330 711 1481 1176
488 1170 1389 1373 1033 1121 1065 1098 13 1043 1721 2206 1621 3338 1564 1149 1604 5534 4399 1688 4265 2025 1401 10259 6684 3269 1510 1030 6685 4135 1152 1092 660 1102 6689 5209 1828 1060 1195 2147 2236 6170 6693 1063 1124 1187 1052 661
489 2765 662 4330 4589 4590 810 710 2179 2928 8232 711 6652 1540 2718 3585 2866
490 2637 2725 1860 5329 737 3507 696 762 4164 10215 1853 3257 826 6121 1528 1540 2754 649 80 10260 715 722 5906 4500 673 4586 82 10261 2783
491 8095 3202 5886 6019 3837 9044 3447 4065 8090 10262 10263 2646 10264 10265 2657 3201 3209 10266 4685 6282
492 10267 1548 666 77 762 715 2643 710 85 2636 5370 2785 11 2754 818 707 4284 3430 9545 3423
493 10268 786 981 2851 2785 1540 3758 5188 12 1826 721 2017 8 2756 2778 6667 2168 15
494 807 656 1541 852 2782 2937 6719 5709 6717 3500 10269 715 2926 3525 3605 2014 2012 3512 703 762
495 2664 2502 2273 8090 1905 8197 2445 5757 4372 4360 5811 8475 1837 10270 4168 1799 1909 1129 2559 5753 6610 1639 745 5878 9301 3431
496 164 657 1540 4656 4927 3605 6385 12 821 3507 4859 1541 1003 773 2903 1852 3245 783 2014 852 2706 2785 703 5020
497 4418 1939 2434 4262 8719 2334 2045 5781 10271 10272 8961 1810 10273 6678 2341 3371 9438 3294 10274 5743
498 69 1860 0 2737 813 82 814 2638 13 2823 694 2902 3131 787 4497 785 774 2791 1446 786 807 760 6827
499 982 9930 10275 601 9952 998 10276 10277 9485 7524 573 992 10278 619 608 7522 838 7320 612 8459 10279 6064 3089 1671 613 563 557 835 593 607 577 10033 10280 5163 10010 1310 1672 568 580 576 10281 10282 10283 10284 10285 591 7525 8060 8045 4706 10286 8004 7536 7532 6640 10287 581 566 598 10026 987 986 10288 1271 599 4684 610 584 10289 10290 836 5165 10291 4673 10292 7997 10293 10294 6641 8492 3434 4721 8566 758 10295 4843 1277 10296 10297 10298 10299 10300 1276 10301 10302 10303
500 4113 4134 1121 5746 4121 5603 3273 929 4613 3269 10304 1848 1871 1123 2684 1831 1155 1031 4074 4372 5531 1418 10305 1985 4197 1139 2559 5818 6676 7576 1905 1407 10306 4217 4140 1601
501 10307 10308 165 2989 4820 10309 331 237 2993 218 545 99 2979 51 10310 10311 10312 5981 155 131 10313 8026 10314 153 9590 154 4741 367
502 1882 5807 1053 2134 1637 10315 9747 1103 2638 2781 3638 3600 787 2815 2706 1935 9501 10316
503 3332 8149 8528 2775 0 3495 4587 731 2737 673 3486 4656 5329 1551 709 1710 8065
504 2749 8 1060 10317 2317 8229 1101 8191 7038 1103 7123 1243 10318 5213 10319 10320
505 2911 1646 1111 4193 5108 2684 1442 4351 4022 3371 1044 7493 10321 1098 1487 9771 6421 2064 10322
506 783 4326 88 7422 81 4301 10323 4995 7210 1860 720 1541 810 762 2637 11
507 1107 1398 1385 1105 6188 4376 1239 909 4408 10324 4126 1393 1157 1406 3050 1044 1073 4128 4339 7203 3262 5833 929 2037 1109 7485 1653 7766 904 10 1397 4471 1134 1971 4263 1600 5814 4076 1623 5803 5451 894 10325 1607 4138 2120 1137 2199 10326 2684 4418 4193 4544 7394 1399 9665 3748 5753 1143 1112 6700 3356 69 6668 3422 3750 1189 1420 4102 6665 6237 5517 4209 1204 1647 1128 10327 1661 1192 2683 10328 1061 4 1258 1054 925 1058 7038 9663 1441 4270 7786 1440 7340 2686 1095 3273 4464 1133 7751 1145 1330 1098 1240
508 3757 775 7721 6826 4865 10329 7740 5001 724 714 10330 3614 6624 3300 3782 2807 10331 1533 10332 10333 10209 7221 10334 10335
509 10336 2083 10337 3742 8356 10338 3096 10339 10340 10341 3104 2674 1791 10342 10343 10344 1765 10345
510 2794 2756 5357 736 692 1837 4530 1428 5092 1109 1136 1645 1540 690 657 813 1717 709 1541 8597 2017 2849 5799
511 1711 2813 10346 4295 2968 5188 2836 696 2877 657 768 2930 762 665 3356 783 90
512 657 709 2179 1540 87 3775 92 3760 7741 710 1628 1682 12 3507 4859 11 1003 738 821 1541 852 10347 2014 1018 773
513 4032 4390 4551 10348 4336 4608 6453 8223 4631 1110 4892 6399 1327 4264 10349 4435 1482 4623 9469 10350 1108 7207 1109 1604 2914 1393 4531 10351 4221 1428 10352 10353 5641 10354 1470 10355 10356 7768 1253 2911 4343 4144 10067 4544 1149 10357 1455 10358 1145 10359 6554 10360 3268 9736 10361 6409 10362 1152 10363 3373 1245 10364 10365
514 10366 6928 3504 1541 3605 3609 3578 702 729 3556 5051 2708 5659 2826 2845 4923 4092 3619 844 6722 716 5372 691 5235 6673 4796 668 10367 6727 981 3572 4091 10368 10369 2848 3765 10370 732 10371 2862 724 8988 6735 8595 9240 7873 10372 6034 3794 2830 1017 5148 3660 6059 10373 4307 3759 3641 10374 7079 7815 10375 6047 2886 2964 3645 10376 3555 3552 10377 5273 3603 9156 10378 3612 4492 2899 10379 3768 6123 10380 10381 2896 10382 3545 2897 10383 2868 10384 10385 6844 798 5868 5269 1719 10386 5282 3646 8613 10387 10388 10389 2801 795 8966 5849 8413 10390 6043 10391 6046 7544 979 4498 1444 739 5506 2015 10392 10393 8625 10072 7811 3503 7878 10394 8633 2895 3771 9198 6131 1004 8628 3636 4933 2893 10395 3583 10396 10397 10398 8341 3700 4083 10399 8296 10400 5698 5906 10401 3788 3670 10402 9246 5379 5913 8390 9109 89 9135 10403 10404 10405 821 2927 7235 10406 10407 8659 10408 4963 10409 5172 5382 855 3600 6153 10410 10411 8527 10412 8326 6144 5176 10413 2905 657 2887 3312 9586 5278 3529 10414 10415 4501 10416 3309 3791 8646 7643 10417 3633 7333 3625 806 2842 10418 6060 7434 9567 3678 3251 10419 7335 5270 4921 6747 8676 10420 10421 5666 10422 10423 5842 10424 9543 10425 9264 10426 5022 2737 10427 737 10428 10429 697 10430 10431 5060 8626 8750 10432 10433 8683 10434 10435 10436 9274 10437 10438 10439 10440 10441 10442 10443 3628 10444 10445 10446 10447 10448 9572 10449 8328 10450 4999 6037 10451 3647 3239 4280 10452 9568 6385 5322 10453 7870 10454 10455 2902 10456 10457 10458 10459 9235 10460 2797 7085 9584 10461 5724 2904 10241 9578 3787 10462 10463 10464 10236 5341 4929 5703 10465 10466 3667 10467 10468 6033 3497 10469 2775 10470 10471 5210 5020 10472 5181 10473 7895 10474 10475 8342 692 10476 10477 10478 10479 4510 2781 8693 9564 672 6048 10480 9585 8757 10481 5400 10482 5023 760 10483 10484 4166 5398 10485 10486 10487 5717 10488 3662 10489 7438 10490 10491 10492 9285 5401 10493 10494 10495 10496 10497 722 3069 5489 10498 10499 10500 10501 8690 10502 7242 10503 7652 10504 10505 10506 5671 10507 10508 10509 10510 4312
515 625 10511 10512 632 8039 3099 10513 10514 1763 10515 647 7666 8940 5435 10516 6318 8444 10517 10518 1296 1733 1354 1344 10519 1363 2673 10520 10521 9405 10522 1760 7730 5431 10523 10524 1756 10525 10526 645 10527 10528 10529 1731 966 10530 10531 10532 1282 10533 10534 10535 7670 10536 10537 10538 1727 973 10539 7694 7663 10540 10541 10542 10543 10544 3103 10545 10546 10547 1781 10548 8497 10549 10550 10551 10552 10553 10554 10555 10556
516 335 420 33 457 3029 496 395 326 239 10557 10312 3039 437 512 10558 10559
517 10230 1143 7799 1518 3832 4177 1401 1121 10560 4482 1059 1252 7797 1376 4569 2559 4613 1112 10561 1054 10562 1134 4425 1421 1130 1647 1377 4359 1153 1451 7770 1116 1594 1422 1102 1658 908 1152 4343 4144
518 4308 4459 2727 3707 4361 3461 700 10563 10564 10565 10566 5319 826 4274 6154 4587 981 81 8342 3247 8230 6977 10567 1856 1826 9482 738 9483 6016 5060 814 1707 2782 3250 6152 10568 4166 6709 10569 74 10570 10571 10572 10573
519 956 9412 1303 4717 10574 10575 10576 10577 10578 4065 10579 9030 10580 10581 10582 10583 10584
520 3480 657 1684 827 824 93 5231 3423 82 648 10585 1029 649 11 1530 2736 762 12 3045 771 2902 4332 10586
521 7485 5204 3267 5191 4328 4892 2603 1050 1055 1109 1837 4128 5462 1056 1114 1141 10 1057 1596 2037 1091 5092 4 1058 3451 5577 1163 4031 1087 8574 1170 1069 4108 1785 1040 2559 5362 1043 1046 4270 1420 1129 1887 10587 1062 4299 2134 2822 5 4021 5645 2756 1687 1001 1831 2045 2410 10588 6164 2222 5790 7090 6309 2683 6576 4339 4529 7751 3050 5095 1623 6215 1189 3461 904 4459 2932 1820 7121 780 7252 7486 1431 7804 1901 10589 2847 4488 4325 10590 1979 1244 10591 4491 8152 2700 7123 1902 2799 1548 7098 918 10592 5228 8784 660 4220 2199 5487 2678 1157 6433 4035 5465 7167 10593 7062 4036 5582 1635 2701 8776 3425 10594 4511 8534 8078 10595
522 554 576 586 582 605 10596 827 762 3687 2707 765 10062 9992 10597 991 593
523 70 6737 2772 7956 10598 3639 9150 8618 10599 10600 783 82 2709 1682 1532 649 7545 5247 769 2957 1540 9544 715 8988 10601 9158 5659 9155 6782 8403 4981 10602 8320 8415 5244 846 5491 10603 9139 5175 8406 10604
524 6134 10605 1536 696 9171 11 3518 10606 3493 827 5870 3423 5663 4909 5666 4929 9542 6716 3506 4943 3793 6937 703 4310 7639 3523 5488 2714 2713 4904 5665 4580 692 10607 7716 5678 10608 3291 5696 8595 7722 10374 10609 10610 10611 3602 2871 3305 3819 8636 10331 10612 742 699 6946 4964 3628 3678 3646 10613 9187 5509 6030 3684 7333 10045 10614 6827 10615 9102 3656 8389 5503 3676 722 6819 8640 3605 6927 2964 3650 2020 3777 5015 3618 2804 15 6020 1001 3768 10616 3555 3787 5355 10617
525 3261 4876 1559 5784 1598 1399 2236 10 2222 3266 10618 3839 3270 4488 6164 1130 6166 8248 6308 6922 4015 1060 2685 10619 4339 8565 1036 8764 7540 1509 8763 4036 9223 1442 7025 9751 1170 4546
526 1214 1111 1056 1143 1057 1077 4339 5758 1557 1108 10620 1598 1391 3745 1876 7771 2493 1429 2972 7699 4415 4299 3831 10621 4186 5574 4185 1802 10622 5076 2684 5830 4126 1323 4453 4627 4191 1325 7472 10623 4135 4426 4146 4369 4179 10624 909 6610 8194 8887 2052 6108 1326 1431 10625 2163 4871 1133 1156 2632 3748 5204 10626 1910 1087 4435 1317 1329 5465 1330 7195 4488 5471 1962 1103 4270 10627 10628 2059 8272 1104 10629 1398 1658 1018 1793 1425 8200 5090 1893 1922 2189 2428 2259 8845 8952 2593 10591 9626 1031 2568 6224 2087 1053 1257 2324 9768 1386 8926 1878 2120 1996 1470 1978 2509 1471 5472 10630 5478 257 2362 1109 4826 1916 1829 10631 1128 1478 1259 9789 2033 2345 10632 5097 8259 10633 2093 3379 3230 1472 7309 1439 3260 6071 10634 10635 2032 10636 7273 2046 10637 1858 9791 7404 2372 10638 4183 10639 10640 2384 8740 2080 1863 10641 2916 8260 7570 4544 5485 3741 4155 2226 10642 10643 7827 10644 6180 1256 3294 10645 6407 1496 1114 930 10646 1240 10647 10648 2699 904 1799
527 1317 4173 1467 4141 4114 7 1234 2972 4359 1057 1604 4201 4072 4548 10649 4215 1388 4027 2559 1142 8217 1196 1191 9720 3414 1841 1379 1149 6239 1398 1799 1122 4647 1561 1381 10650 6211 4544 1380 1130 2025 1449 1439 4880 2222 1646 4538 4376 1063 4454 8216 1423 2664 9091 2320 6164 1633 6 1661 1663 6187 1455
528 11 1539 817 1000 665 700 2713 10651 2820 1003 2878 811 5504 2720 5679 4309 1005 5012
529 1068 1399 1583 8819 3714 4318 4102 5617 4022 7485 10652 6381 7121 10653 1439 1034 1623 1380 1026 2322 1170 6587 6994 2199 1030 8202 1634 10654 9020 5226 5237 7038 1173 3823 7486 10655 1160 9094 7937 8780
530 1391 1385 1449 4183 4138 2031 1467 1111 1439 1142 4158 4215 1645 4114 4376 10656 1803 1214 10657 7340 1423 1324 4297 2664 1647 4227 4451 4476 1438 4875 4477 1649 4072 4528 914 7751 1456 1393 1397 1663 6187 5639 1124
531 4876 1421 1645 4465 4548 1737 1154 4513 6190 6218 1654 1164 7189 918 4408 5758 1251 4269 1659 6687 4425 1435 13 10060 10658 1229 7775 1152 9061 1103 1134 1101 660 4212 1613 8374 3295 8810 1076 2110 4409 1518 4515 4359 1151 9660 1327 4527 4114 1048 2072 7770 1397 4186 10249 897 1146 1429 1971 1441 1432 4134 1057 1455 7792 2025 1460 9747 6701 1071 1398 1109 4126
532 1317 7623 799 1404 4460 907 909 3831 1645 780 1644 4128 4560 1441 1326 1146 1420 1314 9699 4630 1322 1329 6400 1330 1240 10642 10623 1518 1245 7200 10659 10591 2974 9808 8538 1130 1244 10660 10661 8963 10643 8959 10662 6512 663 10663 7699 10664 4415 2916 10665 1250 7631 8481 10666 10667 10668 4628 8769
533 2354 2568 2089 3425 10669 10670 8475 10671 2141 5453 5611 1482 1887 4256 1127 1196 10672 2668 10673 10674
534 3713 4627 10675 10676 1831 2542 7919 2033 5100 1971 3542 10677 4138 3746 1619 1054 1652 7155 4327 10678 10679 1441 10680 5594 6678 10681 7618 1156 4625 1143 10654 1134 10682 6204 7623 6576 1104 4283 6177 10683 1084 5517 5465 1109 3702 2973 1482 1321 1053 3749 1162 5633 1432 4202 8816 4338 10684 7019 5542 4443 7450 7486 4643 10685 1556 3278 6181 10650 1464 10686 9704 1240 1457 10687 1828 1375 10688 5535 1414 1250 2093 1327 7303 10689 4873 10690 5110 1146 10691 1455
535 2826 3083 8 769 3593 3568 1682 3247 3584 87 1718 6136 3417 3418 4910 2716 710 5351 10692 92 786 1542 4949 10693 3281 7956 649 2801 721 93 10694 10695 3592 7544 6156 10696 4078 8013 3761 10052 10697 4585 6020 3069 5876 5058 3803 7597 3058 7210 10698 10699 10700 7552 862 3432
536 1723 10701 1725 5440 1288 10702 1750 5448 1772 1736 10703 10704 1372 1774 10705 8878 5436 10706
537 762 662 650 90 2643 2725 2874 1548 4500 3248 811 2014 2179 3309 10707 743 2706 2804 1937 3422 1004 653 5148 4111 10378 3567 773 7545 3647 3245 5340 2796 2736 2786 10708 1001 2800 5319 7130 3788 6655 9501 10709 1021
538 6685 10710 3739 1143 7492 10671 1798 3715 2330 10562 10711 4138 2192 10712 1081 10713 10714 1056 10715 10716 929 2025 1138 1109 5606 1638 4374 3278 1040 10717
539 1053 1056 1385 6206 1552 1070 10718 10719 5636 5547 7914 4097 5202 2222 1170 5471 5585 1377 6225 4526 10720 1393 6 10721 7699 10654 5224 6209 1859 5468
540 9591 222 267 6332 10722 6369 10723 10724 10725 10726 10727 10728 1524 204 10729 488
541 4343 1639 1109 1135 4348 7197 1145 1094 2491 2911 4125 781 6685 3338 1077 2737 8617 10730 83 6274 2013 696 1826 7233 8 710 10731 10732 10733 10734 10735 3918 10736 852 8650
542 3290 1549 764 781 654 4195 1716 655 1056 4397 10 1399 660 11 1550 769 649 827 12 15
543 1545 76 1853 868 3167 1532 737 786 1530 11 2729 724 814 69 3422 3423
544 1442 6982 4614 10737 4427 1650 4102 3056 9315 2096 1111 10738 4396 10739 1075 10740 10741 1129 8229 5535 4486 4407 1238 6185 1803 2165 7186 10742 10743 10744 10745 5733 3287 1090 4633 1110 1026 10746 1050 2702 1592 10747 10748 8194 9863
545 406 6951 6649 2968 3490 10749 4710 9266 10750 10751 3803 690 852 10752 10753 668 2788
546 706 2756 16 1443 1000 2820 4094 1548 654 826 724 765 1006 2720 2770 655 8576 649 2738 2754 720 1005 2851 10080 2926 4310 12 4862 2927 788 17 1003 1539 8206 8398 4800 1050 3130 4656 7700 3594 93 4332 2798 2806 2724 10071 2712 711
547 1317 6068 10754 3338 1452 1820 1598 1195 3545 5848 10755 2274 1805 696 4590 703 783 10756 10757 10758 10759 10760 10761 10762 1573 4418 3265 10763 10764 6369 6629
548 5812 779 1040 5810 4535 5816 2372 5819 3450 5803 9414 1618 1054 4193 2255 2154 1843 1051 1053 1136 1045 3275 1202 4612 4032 1130 1837 10765 5814 5076 4533 1050 10651 75 2737 2019 5875 1685 3559 10766 782 1722 7250 5191 9057 2663 3372 1318 3266 1143 3822 4108 1226 3278 2136 1797 781 4298 5759 1418 7298 3451 4412 2120 1157 8558 2822 7485 1227 10767 10768 10769 8469 2632 1101 1230 1399 1903 2199 8879 4334 5462 5408 1306 10521 9795 8493 8574 660 10770 7199 929 7192 6381 1110 4395 1043 6117 1616 4343 1983 4270 6215 8473 8197 10771 10716 5531 1920 4252 1052 10772 927 1998 3365 1661 8226 5134 7450 1254 8257 6999 10773 5749 9625 1104 1138 5465 9869 7339 1474 10774 10775 8180 1568 4 1133 10776 2682 4406 3333 5190 4322 4873 4388 2775 2851 683 657 11 5592 4135 5640 960 1355 10777 1757 799 3452 7975 1228 7937 10102 10778 1060 3290 4903 1015 760 710 2773 1623 3455 1220 1057 9738 1240 1330 2701 1078 9744 10779 6181 10780 1979 2700 7944 10781 1034 2050 1146 2317 5538 1098 10782 3376 2232 1814 6841 1245 8803 1480 1103 7000 1244 4399 7516 10783 1711 2179 10784 2110 1175 1593 6241 10785 10786 10561 1321 9761 10787 10788 1102 4541 1630 1855 2624 7752 1069 1512 5473 6943 1904 10789 10790 8563 905 4473 1632 10791 2593 5778 1114 7300 13 4443 10637 9020 2130 4164
549 715 783 2737 3280 2874 1540 87 688 4711 1548 1718 3483 92 1541 3072 786 665 2775 4111 9211 2179 710 69 6153 762 722 767 7860 10792 2014 4314 669 4962 3546 4956 5188 2889 3482 5341 6123 5794 3503 4293 2708 3603 4657 7810 2963 4911 10793 714 798 1716 1003 768 769 2967 10794 5358 10795 8586 93 868 2764 737 852 1717 7431 649 3045 4237 2729 10796 2800 10797 2757 2736 8 2748 6715 1015 3593 4928 7120 10798 3609 2743 2773 2638 2739 90 760 653 3608 1853 8019 7708 5717 6030 6722 8012 2707 824 7446 10799 5675 10800 10801 7585 6253 2709 763 4508 1628 724 1444 2787 703 7872 10802 3479 5345 2904 6671 10803 3626 10804 9112 4905 2742 2758 771 2017 648 765 2746 6727 10805 6129 4091 6736 3591 10806 6151 5688 7938 4271 3317 10807 10808 3281 82 3533 10809 2885 10810 3629 9240 10811 10812 3323 4924 10813 8595 10814 2754 10815 6735 10816 2851 6738 3637 7338 2886 8587 5285 2801 6128 716 2763 11 3499 721 10214 2012 4279 10817 2846 1446 7719 5670 6844 10818 7892 1684 1627 816 3484 4094 6940 3768 3633 693 3553 9090 2734 3763 3314 652 1006 2725 3604 2635 2875 9219 4511 5073 4303 7652 8591 3592 7233 2897 774 2777 2781 776 2747 3772 3695 7315 10819 1534 4078 3640 5868 2844 10820 696 692 2864 4927 7440 2826 2959 2849 2792 9151 5278 10821 2842 5354 4939 3613 3512 8171 2715 9114 5349 654 80 4274 2882 740 4919 10822 1860 10823 6960 3567 9234 3647 7707 709 2835 4083 770 807 1933 5374 7453 10614 662 10824 10825 5845 3759 8277 5801 2020 2895 10826 3493 3590 9244 3311 8970 5356 772 3300 3545 7436 6654 3667 10827 7138 4507 10828 8013 4500 6258 7959 3634 2899 10829 5063 6033 9256 3819 10830 2957 3651 7706 5360 9218 8284 2751 2869 2848 3305 5001 10052 10831 4953 10115 2769 4244 10832 77 5269 2774 3684 10833 3641 3654 10834 5244 10835 6268 2905 3771 10836 2780 10837 10077 7586 8527 8454 10838 4086 10839 10596 10840 9283 9235 2716 3807 7442 800 10841 5347 10842 9113 6976 10843 6035 88 10844 3699 7715 6895
550 1054 1377 1406 1143 799 1463 4135 1392 7799 4 1183 1152 889 3832 2466 1720
551 5580 4197 1442 1821 3748 7750 5629 2255 4535 1130 5608 9612 929 2226 10620 3338 8222 1696 8906 4372 1255 5830 5640 4270 10845 7886 3265 1075 4254 1810 1031 3373 1109 1176 8559 1785 4360 1044 4621 1121 3359 782 1454 1249 1646 1661 1056 10846 1598 4139 10716 2192 7902 7514 899 6 9207
552 1853 10847 3490 2758 2017 8171 10586 4657 7746 10848 6121 10849 2763 2800 4501 771 7120 6675 6967 790 10850 4331
553 665 3495 1717 2874 761 11 827 5870 821 786 649 2737 710 4293 762 715 6121 2719
554 5918 5981 39 436 10851 4821 4826 5962 4597 10852 4841 275 9608 512 535 308 6005
555 3830 6215 10853 6453 9322 10854 10855 6580 4373 6098 10856 10857 10858 10859 8223 10350 10860 8997 4344 10861 8855
556 10862 75 93 1682 3129 70 713 1717 2737 826 11 821 4586 693 3539 3695 4111 82 6201 3495 1707 743 2826 3130 4313 7589 3512 3549 774 1541 3507 4332 4162 1542 1826 668 10045 6027 3684 3545 715 4991 3251 6119 2909 2858 3651
557 3614 2825 10863 2845 2961 692 3590 8314 2640 2846 9105 3513 4161 3284 1941 6134 6795 844 5499 10371 5658 3291 5656 2729 10606 4305 7314 10864 8389 10865 10866 7864 3663 9888 10867 5799 10868 5845 7950 3608 5233 6709 2835 9370 2844
558 1928 1048 5748 4376 1569 4400 2095 4408 2972 1393 781 7542 1130 1377 1797 1561 10869 1069 1065 4343 803 1440 10870 1380 4441 10871 7823 1091 4348 1413 7621 4209 1216 2916 7121 10872 4334 1721 5833 1236 10873 2684 929 1101 1134 1848 1051 5567 909 4399 2620 9521 1451 4435 8724 1202 6072 10874 1084 3831 10875 2191 6694 5257 3542 4871 927 6212 9020 1240 4321 10664 1654 1323 10876 2093 1138 6681 1111 1258 1043 799 4476 1656 4529 10877 6170 1855 1604 1184 10305 10878 2252 1986 5517 10879 8235 10880 8205 10881 10882 1053 2700 6225
559 10883 8236 4158 899 2388 3223 5603 10679 7560 1139 2394 1720 1031 4555 10884 10885 2118 2686
560 1531 737 3083 813 709 1717 2709 7544 2737 2874 70 1541 77 6146 6202 7424 1529 10886 5186 816 5230 1941 4083 3525 2017 10742 6587 2124 1049 5225 770
561 3433 3444 2658 10887 758 10888 748 10889 722 821 2012 662 657 2737 715 3045 4164 3495
562 648 4711 5236 684 9029 10890 6670 81 1682 1718 84 12 2902 783 2637 5151 4111
563 2017 5186 5058 3555 10891 3530 2731 10892 1717 10893 6848 4081 2829 10894 10895 1068 10896 6703 3064 10598
564 11 2820 2741 1549 674 1528 2713 653 649 4711 2737 665 87 814 656 69 1717 2851 999 3701 1711 1540 1530 0 711 1685 721 771 737 2019 2748 2874
565 2765 11 649 3426 10585 8146 10897 737 2718 8232 2929 2179 949 4041 947 4052 2 2842 762 3045 12 2784 852 1628 771 2638 2892 2796 6057 774 2803 2706 2851 5340
566 1092 763 1430 2410 10898 1057 1247 1855 10133 10899 4032 1129 10900 3294 1913 2684 9461 1828 2050 10901 10902 4547 2132 2193 3379 2510 9459 9751 1257 1109 5770 2603 10903 4488 2460 1317 10904 1156 1439
567 4150 601 563 4693 6066 572 609 841 1676 4698 4843 598 5163 573 10905 7661 3473 10906 10907 1677 3090 3089 553 9927 614 10908 4052 7998 1276 10909 6639 5304 10910 9946 10911 617 9952
568 10801 10912 3547 10913 8966 10914 10915 7411 10916 2951 10917 10918 10919 10920 10921 5694 10922 10923 8623 10924 10925 1017 10926 4087 10927 10928 4081
569 2718 813 1716 3045 1628 800 670 762 1539 657 981 1545 685 11 1549 4284 1717 5870 1541 811 1540 817 4310 2745 2179 2638 842 3356 655 5092 3483 7231 852 2014 8636 5018 3167 3248 5504 7895 2964 770
570 2820 4309 665 2785 4161 1532 5905 999 5906 11 1860 12 1853 2709 827 93 6005 9926 10929
571 7517 5575 10930 8181 10931 1119 7295 1614 4136 2568 10932 1565 779 10933 6665 7040 5469 1401 1170 9096 7940 5731 4168 4126 1327 1568 2466 7186 2491 5463 1820 1044 8714 929 1840 4220 1203 2559 5620 4177 1072 1090 5079 2236 904 4015 4 5471 1645 3287 7038 1932 10588 2231 1761 1142 3048 3736 3359 7751 1813 1145 1175 9652 2189 7287 6096 3377 4270 2484
572 11 824 1545 1685 4711 827 10862 822 4310 1535 3539 2713 4330 6109 721 2733 848 3626 696 1716 3591 1005
573 1076 799 1126 661 1203 1624 5139 1211 6702 3268 9317 4879 1031 5197 1102 1052 1073 781 10934 904 4183 1043 2164 4160 1553 2044 4209 5567 5211 3749 2036 1090 3338 1108 2462 4454 1422 1602 1089 3750 3454 1384 5219 4338 4892 5223 3742 769 11 5210 1654 1057 5218 4534 10935 4354 1187 5538 1051 1084 1075 1077 5193 5208 4482 4134 7251 1030 1512 4126 1327 1140 1377 2741 1006 10936 1428 1463 4515 914 892 2713 81 4613 9504 4585 1924 4876 10937 4612 4387 1117 5544 1068 4544 1133 1868 4327 4221 694 2724 8019 1716 5600 9651 4405 4128 7791 2071 2787 2466 2105 1467 2618 1145 4251 4337 660 10938 10939 5817 4443 4396 1604 1053 4 2095 3456 6386 5204 1962 2142 1399 1458 6587 10940 9721 1125 721 2729 4656 2820 768 2965 2742 724 2147 1105 1121 1109 2822 1046 6554 10941 6308 10102 8737 2714 1000 10942 783 3483 1628 1685 824 2874 4076 10633 1253
574 13 9696 4 1090 1129 2678 4028 1224 1675 562 1665 1893 10943 10944 6841 10945 10946 10947 1948 10948 1983 10949 10950 5485 6241 1558 1509 10951 743 8649 3259 6278 10952 2718 3290 10953
575 1645 1104 1239 4158 1149 1324 1388 4451 1126 1235 4323 1117 6106 6517 888 10954 10955 7340 10956 6669 9005 6688 4530 4454 10765 7792 8255 4100 4457 1486 10772 7802 1456 10957 10958 10959 4472 6576 7306 10960 799 1321 6308 10961 1837 10962 1472 7196 4327 1383 1322 904 10963 4388 1487 6207 8264 1320 928 6432
576 1443 665 8171 2737 2708 3055 2709 812 9018 5517 1076 4399 4882 7121 10964 782 1590 2851 721 2753
577 980 3588 2179 2902 2897 1018 1015 3638 3651 4590 10965 8597 710 2725 772 10966
578 918 2274 6239 2192 1139 5265 1185 7472 7395 5807 5209 10967 1198 3832 4374 1839 3360 5598 10620 1479 10968 10969 7975 4157 8716 2509 1837 781 3260 4390 5452 10054 1255 1155 9676 2186 6614 5139 5592 2466 2666 10970 1828 2112 4261 4149 9447 10971 1882 10972 2027 3275 8232 3423 3430 8557 10973 10974 1960 10670 10975 5823 7281 10976 10977 10978 7389 5460 1418 769 4981 1134 2741
579 5629 4555 1084 1062 1077 2160 2051 3823 4443 9760 4396 4183 2025 9479 1995 2330 4472 1106 7460 1052 10979 4126 1249 1376 4630 1892 1385 1468 4424 1102 1922 1456 4634 2700 1884 1480 3260 1875 9476 9425
580 6066 821 649 13 2933 10980 1595 10981 10982 10983 3121 2715 774 770 1826 811 710 181 3129 608 4843 10984 1786 10985 10986 10987 4770 2706
581 1707 10988 689 4608 4406 10953 10989 801 5788 2912 2513 4669 10990 10991 10992 9860 10993 10994
582 683 2775 3326 2179 1853 4164 6628 8 7233 4294 649 3626 87 688 2959 7412
583 3739 4258 1050 1054 1420 1794 3722 1129 4114 1439 9731 904 1040 4145 1109 1640 4193 10995 10996 5204 1176 3702 1031 7 1130 1068 4893 10997 6245 1518 10533 1645 4405 2684 1055 2096 4234 5199 9025 7492 4217 3751 1391 4138 1924 1459 2686 5 1141 3749 7295 1323 4471 1322 2974 1104 7899 2680 1226 5465 9734 1457 4033 5258 1837 1165
584 1937 2713 4910 4274 5658 657 3767 2964 852 844 10998 7864 769 1541 1540 2754 2903 4731 3500 710 2835 6274 3512 4860 702 8398 3605 7446 2897 8656 3525 981 774 3576 5012 656
585 2765 688 69 3422 669 731 4294 5350 826 88 5014 10999 6715 4904 7721 11000 3046 11001 855 1685 7712 2737 4731 4917 92
586 1149 1645 1053 1109 1378 1383 1389 1396 1152 7574 4077 1321 1253 4114 4404 4227 1146 1393 1458 4548
587 3356 3510 11002 3584 764 4860 1540 4994 821 9486 75 3167 11003 710 11 2767 1551 811 8548 4248 10707 657 81 9660 11004
588 786 710 827 981 2014 2737 2784 2012 714 11005 11006 2897 3701 9390 3245 11007 675 821
589 4585 3495 812 868 827 0 3480 657 1546 4590 824 2769 3760 4390 11008 2124
590 781 1616 1979 2378 1072 2293 1818 6615 5830 5092 1325 4036 8229 4452 4435 3712 9094 3734 7897 11009 1253 9704 1054 1427 9460 5204 6 4443 4632 3373 3743 2199 7115 1321 7119 7486 1594 3267 10591 4328 9742 8536 4891
591 6156 3045 11 3167 813 762 2736 737 722 648 11001 2012 652 1717 821 2759 668 2928 4289 716 4091 2899 3625 3499 10190
592 1033 1055 1377 1470 908 1412 11010 1971 1649 4186 1075 1176 3745 4869 9068 3828 1373 4334 4179 1118 2973 1389 5836 1512 5079 2970 1153 4556 1426 2127 4567 893 1983 2620 7915 6215 2609 11011 5810 6693 1410 1695 2082 7542 1156 7799 2320 5136 2378 9210 5110 11012 4114 7204 6211 2684 1109 4270 5830 8202 1385 1434 6548 9749 1616 11013 4425 1152 1561 4876 4120 7775 7791 5529 6092 1656 4204 4205 894 11014 9682 10100 899 1091 1228 1383 1482 6206 1490 1409 903 9388 4217 1130 760 845 8587 1073 4177 1053 1119 7768 1401 2025 6688 1463 1111 1455 11015 4343 11016 1440 1031 1659 7821 5134 4630 1837 7800 4359 1451 1640 4454 5105 1469 1432 1387 6575 3373 1174 8200 4219 1249 1250 1458 4873 1468 7202 4144 1398 4376 1449 925 1453 909 11017 4327 6240 4528 1149 1324 4404 7094 1244 1155 1465 1322 11018 1321 1480 7450 1079 11019 4350 5831 4126 11020 921 4390 4548 4465 8267 1331 1050 3275 1464 11021 4458 11022 3268 1869 9717 11023 6974 5362 7822 4256 8744 1396 1240 8270 5542 8955 7122 905 928 1979 1493 1259 9424
593 1551 2775 4981 2737 824 1541 4293 765 81 999 1682 93 1443 786 760 2720 845
594 4280 10605 847 2638 69 868 2855 1937 11024 826 821 6054 10612 2875 6937 6257 11025 11026 8640
595 1117 11027 4297 1596 1087 1601 1066 4137 2154 9414 10 6228 1848 5208 1611 1031 8176 1928 11028 11029
596 1000 855 2855 11 653 2720 11030 1716 709 824 6016 4293 810 3281 763 1539 817 1549 4309 2638 1628 1535 1685 3284 2897 696
597 11 824 3573 2726 2724 656 4996 12 3647 2819 5845 844 8287 15 5150 2706
598 3356 7238 5865 4911 10489 11 6271 6270 814 4732 800 2747 815 4657 6902 703 7423 696 11031 769 5155 3565 10260 11032 10380 6778 2707 11033 4918 3280 11034 11035 8171 981 11036 710 8 11037 6886 4994 6818 1717 649 827 3497 2019 3624 11038 1709 11039 11040 1540 1444 11041 737 4581 11042 697 5665 2930 1707 1003 1537 69 2737 4101 2179 771 3653 2735 8206 11043 3046 87 3430 648 3045 685 2014 2638 714
599 7866 4081 2831 11044 9491 11045 11046 11047 9156 4293 3312 11048 11049 6878 981 11050 9582
600 729 4091 668 2020 10215 8018 739 2725 2785 8388 2827 7323 4294 3239 1001 768 4928 2739 3063 10863 5703 2740 6720 6751 1002 11051 3242 5061 4278 2716 7890 8972 4915 3567 2854 11052 9214 11053 710 3760 7440 3555 1548 2927 4306 677 701 719 3572 6030 842 3544 648 2851 2761 5846 3054 2813 90 1444 3515 6708 3503 769 6733 3072 5876 5045 3759 10812 5856 3637 848 5400 3763 1684 653 762 2801 2815 3638 0 855 657 4083 2847 2857 11054 7280 10107 6795 1543 3613 3592 11055 6049 3566 2865 2758 11056 1003 2886 2736 2928 3130 4307 3700 5012 2800 703 2897 2737 9389 2753 6203 11057 6725 10795 3626 2868 5270 11058 2744 7652 5273 740 1004 1826 787 6820 3490 8591 2012 1541 4511 9151 3647 3632 2898 2835 2741 11059 2848 11060 3599 6954 4498 5182 10824 8628 7878 2895 4938 7815 2013 8276 11061 2937 3651 5278 2706 6909 3678 2883 3305 11062 3792 6945 2804 773 5018 2796 3782 8293 3309 11063 2902 3291 2863 3774 2875 4933 5041 8594 9191 2170 7433 3788 11064 10395 5320 8406 11065 4804 3245 11066 8412 8318 1627 3546 3259 11067 8642 9261 2904 2015 10331 6268 3324 93 11068 11069 5063 845 11070 11071 9267 11072 1542 4962 11073 11074 3694 9557 765 3083 8328 8336 11075 11076 11077
601 8891 1985 1797 5121 929 3360 4176 3839 11078 7802 1638 6424 1134 4396 1449 10329 2129 10054 2493 5776 10060 1060 3216 5117 2632 3747 1112 1837 11079 1624 11080 3832 1712 11081 4359 1835 3702 3745 1471 1255 7207 11082 1913 1106 4338 1056 11083 1952 6092 5125 2191 7618
602 8709 6191 9358 11084 8845 10005 11085 2915 6505 11086 11087 4879 11088 11089 1948 9805 11090 4654 6462 6408 9672 11091 11092 4181 4392 11093 2414 11094
603 4336 3712 4619 1135 1683 1321 4626 5607 1413 11095 11096 8369 11097 11098 1156 6620
604 10711 7485 2916 4260 5577 4269 1170 5238 6180 8733 11099 1149 1399 7149 11100 11101 6246 1979 8740 4186 1556 7903 1403 1070 1971 1130 9720 1103 11102
605 2813 7412 8277 5885 748 8704 1853 710 821 3518 3430 2658 11103 4070 1937 4078 3626 6030 2014 8018 4590
606 5091 904 4336 1053 8950 4619 6381 11092 4649 1156 4415 10083 11104 11105 9683 8709 9699
607 1557 1074 4422 3425 4361 1715 11106 10315 9615 11107 11108 11109 11110 3822 4892 11111
608 743 702 9402 817 3508 762 704 3512 9368 2846 2909 5357 11112 11113 11114 9609 11115 659 7127 2789 710 783 5150 7982 2866 2725 787 4996 0 770 11116 87 2902 11117 2815 5321 2179 10614 3494 11118 790 800 8289 3297 703 93 4999 7247 5319 3651 11119 2823 2014 2175 3052 8656 4301 11120 11121 9244 10563 3069 11122 8427 2801 7658 11006 2791 774 9499 711 2936 4314 786 6152 11123 852 11124 11125 11126
609 686 3167 82 1532 8 649 87 4860 3510 7608 3495 860 648 2748 2791 2782
610 10584 9036 11127 758 11128 4068 6375 3447 4065 11129 8566 11130 11131 4718 10119 7927 2659 11132 639 11133 11134 11135 8517 11136 3302 6315 6281 3838 11137 10575 11138 11139 11140 3442 6305 8523 11141 6284 11142 11143 11144 11145 6302 11146 11147 11148 11149 3212 11150 11151 11152 2656 8162 6297 11153 11154 10150 11155 9043 11156 11157 11158 11159 11160 11161 11162 11163 11164 11165 11166 2650 10264 11167 11168 11169 11170 11171 11172 11173 8521 3836 11174 11175 11176 11177 11178 2648 11179 5896 11180 8573 11181 11182 10148 2655 11183 6345 6019 11184 11185 11186 4071 11187 11188 9031 9035 11189 11190 4701 11191 11192 9034 6592 11193 11194 11195 9037 11196 11197 11198 11199 11200 11201 11202 300 7723 6600 6342 9619 8163 11203 11204 11205 6299 11206 11207 11208 11209 11210 8572 6332 11211 11212 10580 11213 11214 11215 11216 7928 11217 11218 11219 5885 11220 3173 11221 6325 3201 10152 11222
611 3625 11223 1025 4911 11224 4293 3604 11225 9574 11226 7702 11227 9217 11228 6151 9286 8966 11229 772 10752 10482 11230 5074 7879
612 5776 3340 4533 8895 2618 11231 11232 11233 4513 2508 4570 11234 4270 8557 5807 1706 9422 11235 11236 5704 11237 7253 11238 2278 3227 4372 5514 11239 11240 11241 11242 11243 11244 2243 9414 811 11245 3294 2887 2475 1114 7888 4108 1917 6794 11246 1105 11247 11248 3603 845 6895 9015 1927 8887 1005 826 3285 11249 5265 2892 1373 11250 9425 11251 10099 11252 1532 9629 3277 2753 3453 2031 11253 5511 11254 11255 3374 868 8252 7283 10128 11256 11257 6383 3334 1567 3260
613 1126 1053 1111 8235 807 6216 11258 1105 4021 4882 4516 1098 1065 1189 5 4076 1060 1518 1157 1651 1102 1956 4630 5518 1136 7092 2686 1321 4016 2682 8780 1250 7804 4473 2509 5465 4208 11017 8205 1244 3294 5598 2422 8267 13 6922
614 5235 8528 4919 5357 10437 6123 7431 711 7719 3502 6128 3479 10214 4928 4915 1933 11259
615 11260 7673 1349 1766 11261 1779 11262 11263 3109 11264 11265 1748 3122 11266 11267 11268 11269 11270 11271 11272 3115 11273 6144 685
616 1645 1130 1797 1983 1136 4527 5732 4401 1649 4183 3702 4120 1647 5253 1108 1453 904 1385 1097 1126
617 1747 1130 1128 7211 3264 1360 3266 3425 2335 1046 1282 802 4893 1772 2683 799 7 8760 1596
618 4472 3269 2618 5735 11274 4299 1887 1064 1452 1395 11275 4199 1410 6635 1803 11276 782 1868 1198 4633 1133 2199 1077 5514 10259 1030 9680 1646 5226 899 4270 4631 1227 1848 9018 661 9095 5539 1076 4882 9094 6567 1615 11277 5609 9729 1924 11278 2135 6 1617 1057 1420 4623 11279 4200 1255 1229 914 1060 2584 3343 1067 4 2033 11280 9898 4135 7256 6245 9721 3267 6236 8563 4173 1330 1334 4515 6241 10363 4128 11281 11282 2775 2767 2744 2638 2765 1176 4327 714 8587 11283 1493 1015
619 3607 76 4979 8529 697 743 860 5350 768 681 6198 3510 4911 5235 3600 6721 3627 4920 8605 3788 10827 8653 7652 5020 6053 11284 4963 2015 3072 5175 8429 5267 3312 6038 3787 8278 8012 5270 11285 8690 8646 8683 11286 9564 11287 11288
620 1310 737 2017 2759 1626 2904 855 2792 2907 3167 703 2867 771 2788 0 11289 11290 3651 852
621 1971 1152 4114 1392 1149 4515 11291 1104 6211 1138 3742 1569 1146 1512 4375 1378 1388 5538 1428 1837 3268 1389 1420 1051 1033 4227 1393 1409 4534 1229 1385 1391 1040 4250 2911 1145 1055 1143 799 4397 1057 1187 1604 1076 781 1054 1130 2663 8731 1073 1102 893 1645 1121 1373 4128 2337 1123 5750 1134 1203 1383 803 1109 5219 5517 7780 661 5736 10742 1090 3285 4076 4555 4879 1066 1410 4613 1053 1103 1429 4337 2147 2618 1030 1380 3269 3275 1564 1111 9660 1026 5225 11292 1397 1637 1126 1031 9095 13 1108 2141 1243 1142 5094 1510 11293 4536 1584 4559 4126 1422 3705 1379 1649 5634 2972 8574 914 1577 4548 4533 1077 2154 1463 4172 4160 6680 1563 1467 6225 4454 1426
622 2820 11 827 2638 1535 3489 3488 2014 94 821 11294 824 1006 1716 11295 2785 807 1860 3568 93 2877 1540 12 955 966 11296 5405 6295 762 770 4007
623 553 1743 1724 8445 1338 1781 645 1352 3126 1742 1732 5434 1774 646 7733 1351 1360 1287 1794 1765 1725 1777 11297 9618 5409 5443 7737 10985 11298
624 3356 2014 6717 1532 75 7613 11299 2724 786 5796 669 774 819 2941 15 11300 10890
625 11301 8137 5148 2756 1015 7240 2759 9541 9240 11302 3291 3603 3602 11303 4086 2799 4971 8674 7247 11304 3679 11305 5011 6667 6861 8172 9136 2906 8420 11306 11307 10893 8527 9171 5172 4927 9624 4087 11071 5175
626 1138 3343 5812 5803 4533 4135 5804 3452 1084 9625 1426 6680 11308 8180 5749 1172 2372 1191 7566 11309 7448 2491 2110 2468 2408 10765 5814 7339 3273 6614 4155 11310 2036 6985 2466 7695 2033 8900 2573 9612 5769 1075 696 11311 10118 7302 2678 1059 2133 4160 3335 13 6096 1869 11312 11313 2484 1401 11314 3425 1040 1317 1854 2160 2663 1998 5788 1045
627 4923 1860 3612 7816 3625 4091 5658 764 1000 2720 696 3539 10794 10214 3584 4919 11315 3591 3626
628 5351 3083 3500 93 1860 1000 1006 761 2707 2715 665 70 1444 5687 2017 7573 69 2835 4863 3510
629 3739 1143 3747 1134 1379 3715 1653 1056 1229 1983 4138 1649 1518 1108 3703 908 1250 1321 1033 1152 1383 1146 1111 1244 1330 799 4158 904
630 760 7232 3167 1707 81 2830 87 696 4798 11316 676 11317 5037 11318 737 5158 813 1551 11319 11320 3315 11321 9639 11322 3918
631 5846 2725 4078 3481 2179 2826 11323 4307 816 1015 1541 3532 3556 2638 2963 710 9126 5709 10193 4928
632 860 2820 657 4101 1853 827 4980 708 3552 981 4161 1718 6158 3760 5504 77
633 3507 70 2722 1682 9155 3129 6817 2017 8 817 688 3760 7596 5060 657 649 77 2968 1443 6628 656 1716 9218 813 2953 2763 3539 2707 2755 650 2708 2925 2909 4094 2753 4601 4536 802 1177 0 2782 2737 774 5502 6816 7589 2744 2897 6671
634 2785 2749 3507 2775 1001 3495 1545 649 3426 827 1532 709 7573 4711 4111 1540 2014 4657 4732 75 3487 768 3055 786 3431 4784 871
635 6237 4374 1121 4396 1155 1331 3278 1614 893 4207 11324 4231 764 2818 1323 4299 812 5153 3206 5892
636 1059 7991 1440 1254 6237 1250 1165 1487 1438 1244 11325 1318 11326 2166 11327 6465
637 9676 5788 1111 11328 1449 4538 1378 1837 11329 4360 1879 1055 6207 4327 1152 1436 4212 908 1056 1112 1391 4390 11330 4161 7799 1143 11331 4515 4518 13 4707 4145 1385 1426 7299 1144 11332 11333 1122 1114
638 1972 1882 1812 5134 11334 1066 1207 1994 2193 2664 1828 1932 1638 3218 7472 1221 4137 4153 8266 7309 1721 1846 2445 1949 9447 11335
639 4097 11336 780 1560 1050 10980 4490 10317 2680 9659 3725 11337 1045 11338 1661 13 1084 5227 8761 6553 5605 9758
640 11339 11340 3206 11150 11341 3298 8517 10120 6303 6592 11342 11343 11344 9877 11345 11346
641 1972 1552 5127 1882 7257 3333 8238 2512 2052 1996 11347 11348 11349 11350 1910 11351 11352 2193 11353 2445 11354 1944
642 586 585 2921 9960 2919 998 10276 1669 4678 9928 828 9482 4692 4681 1537 786 2719 2904 669 7423 981 2767 76 11355 5156 682
643 1940 1718 9155 3544 1551 6134 674 4237 956 11356 1741 11357 11358 6721 657 697
644 2614 7966 2666 11359 10250 1836 4300 11360 9439 1877 11347 2320 11361 5258 1843 1814 5819 5787 1927 2504 1821 2096 7302 3706 1452 7552 4611 11362 11363 6179 4255 4571 3217 7965 11364 1480 2672 10069 7024 11365 11366 5734 5108 2326 1519 8559 7300 2379 11367 11312 13 1894 9654 7402 2502 1638 2353
645 932 3395 3394 8508 949 4048 4043 935 5259 2 11368 948 3397 7267 4049 951 4042 3401 942 11369 4044 9072 953 947 5261 4851 11370 3406 5260 11371 944 8507 937 3407 3408 3410 3402 3396 3400 4052 8134 4039 5184 11372 4060 3411 3393 7269 5183 11373 4056 601 8119
646 662 722 3417 8704 4101 685 88 3603 3063 1682 1540 6819 7828 9155 3061 8404 11374 4980 9981 2835 3510 9140
647 3512 5703 2857 4280 11375 5654 8012 8934 708 2896 668 3482 3670 852 3663 2826 4274 789 11376 656 2964 3755 6825 2878 1005 11377 2731 3622 5650 3529 3601 11378 11379 3531 11380 5063 3602 11381 9145 3618 6033 3596 2869 4923 8016 11245 11382 11383 7717 1853 7947 11384 2835 11385 3628 2927 11386 11387 3305 2897 5355 3650 3684 3563 2020 4953 3242 3695 2905 3595 3598 3777 8675 2013 6902 6903 3797 3493 11388 3605 5346 3651 4307 842 8597 6651 5271 8653 5382 9548 11389 3624 3683 5656 3603 7312 3783 10331 3787 3768 11390 13 11391 11392 773 8404 15 10606 3643 11393 7453 1018 8313 6036 3802 4933 11394 7828 10158 5666 769 2015 11395 11396 11397 4991 7545 3592 3312 3300 2780 2170 5061 10209 11398 6055 5173 8318 2761 8625 2797 3634 6042 8307 11399 11400 7658 11401 6044 11402 11403 11404 6063 11405 3248 11406 8317 6960 8311 11407 8412 2859 8661 5235 11408 11409 11410
648 8 8171 2792 2747 16 645 972 208 355 11411 786 3256 652 9578 11412 11413 2649 11414 11134
649 4606 11415 706 685 1628 682 2749 2724 786 8171 8 698 3496 2794 3483 9545 2017 8232 762 3045
650 3629 2134 2852 3479 703 2714 7719 2754 91 4244 4927 4915 3545 769 2760 7706 7747 650
651 738 6197 11416 1540 10755 5652 11417 11418 11419 11420 5853 11421 2907 7573 1005 11422 10942 6787 3639 6909 2748 11423 11424 11425 3079 5860 6750 11426 11427 5865 6781 11428 11429 3551 6760 849 5654 6754 11430 7811 11431 6752 4791 11432 2901 11433 11434 2957 3626 11435 6851 11436 3305 10199 11437 7544 11438
652 3418 4495 5059 4980 859 11439 1543 1937 1708 9089 4294 10651 8303 3591 9507 3518 9367 92 6128 3083 6798
653 8185 3266 1399 4183 4027 1645 6092 1438 8142 4114 6214 1604 2972 2206 1040 5094 4363 11440 3742 1053
654 3342 3450 1566 9057 8730 1840 2258 2502 2573 2156 11441 1805 2110 9439 2337 2614
655 1318 4144 1145 6636 1540 1109 1439 2686 1112 5514 7540 1323 4219 904 4339 9685 9414 2056
656 1551 11442 4589 5845 981 867 688 11443 11444 11445 11446 11447 11448 11449 9609 11450 11451 3998 11452 11453 11454 11455 11456 9642 11457 11458 11459 11460 3928 11461 11462 11463 11464 11465 11466 11467 11468 11124 11469 11470 11471 11472 11473 11474 11475
657 1518 2255 1104 1212 1482 4270 10683 1377 1384 10654 2686 1109 2222 1122 5471 1049 9735 11476 6237 7193 4297 4327 6209 1244 6998 5110 1486 6249 2609 7889 10845 7580 1440 1840 1250 1993 1898 1240 1647 11477 11478 8762 1509 5579 5833 2684 11479 2701 2093 914 1646 1111 4321 7047 11480 2422 11481 6939 3348 7493 11482 1330 11483 11484 1928 11485 4187 4299 1713 3425 1456 4463 5731 11486 11487 1253 4472 3702 7823 11488 7396 4449 11489 4257 6713 2043 11490 11491 1552 11492 13 6162 4205 9904 1110 1970 4443 11493 4334 1451 11494 8778 1077 4126 2109 4535 11495 11496 7793 9845 6400 11497 2330 5116 1995 11498 6565 5644 2178 4412 6430 7631 10899 6395 6220 1056 7784 11499 8328 11500 4583 8399 1055 6543 7830 8538 9775 6118 9727 11501 11100 11326 4473 1134 6523 10092 1800 1124 11502 11503 11504 4635 1496 7489 5596 11505 1142 11506 11507 6403 1138 1946 5742 11508 1488 1259 2482 7394 4667 6476 1526 2670 10352 5473 4610 11509 11510 4178 2604 11511 11512 10949 11513 11514 7485 11515 11516 11517 10139 7822 2461 1263 11518 7502 9822 1441 2342 8808 6473 11519 11520 4032 3724 11521 781 1527 1513 11522 2417 11523 6465 11524 11525 9672 11526 11527 11528 9521 5137 4661 1386 6500 11529 11530 1255 6408 5756 9459 11531 7570 4376 1412 11532 1457 8832 11533 5515 11534 6479 11535 11536 9345 9380 8807 11537 661 6418 11538 4653 6070 11539 909 7559 11540 4651 6616 11541 3820 1156 11542 11543 6089 11544 1070 11545 11546 11547 11548 11105 3835 11549 4410 11550 2350 6841 11551 11552 8848
658 10230 2124 1927 4147 4015 2186 1109 778 1566 4354 4121 2728 2231 9095 7389 11553 7000 5817 670 1539 11554 2624 688 665
659 1562 1052 1180 1646 1569 1804 1837 1146 4 2822 3296 1111 5095 2320 1089 781 1129 4072 1425 1211 6232 1076 1567 5534 1190 1596 5524 1098 9018 4073 661 1258 9093 7540 1050 5750 1117 4195 1558 11555 5577 4530 5452 1031 9091 1105 2330 1554 1145 11556 5191 1418 11330 6221 5586 2680 1399 1216 1645 1591 1403 1104 1128 4160 5255 1134 8217 2568 2125 4517 5538 5618 11557 9228 1615 1043 8534 11558 4873 892 6246 2154 7121 8539 11559 1157 1203 5635 4399 2141 2147 1187 4531 6932 1110 4259 1962 1426 5477 4134 3266 1072 4426 1875 4158 5786 4131 3378 3271 11560 3367 1564 11561 1650 1194 9426 1561 3048 11311 1209 2131 4707 2246 1431 2222 1030 4537 8207 1109 5532 11562 7299 5469 88 4621 3119 973 3100 1186 1833 1058 1119 4015 7911 4108 4526 1831 1324 4631 1556 3050 914 8219 6222 2334 9314 5208 7751 1033 3268 1409 4269 6606 911 1243 659 4477 2665 1407 3344 1040 1967 1143 4220 7485 685 814 1592 1510 1557 1227 1624 2410 4375 1229 3456 1921 5822 11563 2618 1152 2910 6184 1034 4217 4467 2236 4182 1138 4522 4137 11564 11565 7038 1063 6695 1651 5529 7153 9020 9095 1623 1202 6 660 1928 7885 7403 1455 5134 9780 4516 888 1404 7176 4018 11566 1114 760 4978 981 5727 4388 1103 1553 2093 11567 8216 5595 1044 2025 1442 8946 5539 6164 3269 4320 1761 5785 1688 1440 1454 11568 5535 1051 11569 2096 8360 7013 4519 10618 4144 4543 1899 9665 2206 8265 9682 6241 11570 1782 3096 1887 7944 6939 1904 1555 8268 11571 8271 11572 1036 929 5563 5619 1087 11573 7031 3747 2603 6223 3340 11100 5560 4299 9712 11574 10317 1207 7804 4523 7008 8796 5206 1622 11575 8034 1631 3317 4899 1707 2835 1446 868 5530 11576 4559 11577 1245 1094 7159 6262 11578 7487 9687 1603 8959 6242 11579 1070 8074 2932 3285 11479 2227 10145 7136 10653 5198 1238 11580 7910 6563 5136 8762 11581 8963 915 8229 5580 11582 11583 11584 5582 10791 11585 19 1841 5948 5974 8955 9720 8565 6990 1661 5215 7001 11586 11587 8455 11588 11589 1611 7161 10789 11590 3286 1859 5772 5540 11591 1620 1585 9788 2194 4605 6191 1093 5213 2160 6841 10883 2036 4441 1926 2550 4428 11256 2548 10319 11592 1818 1552 11593 11594 10672 1784 4114 3248 9860 11595 11596 4406 2889 4904 1037 1487 5350 1682 15 4111 11597 10882 11598 11599 11600 1584 9698 1906 11601 6942 2050 11602 11603 7277 1163 1883 11604 2243 11605 5218 11606 11607 11608 11609 6982 2624 9613 11610 2029 5748 3425 11611 6971 1222 7002 8375 2044 11612 1979 4032 9763 5485 2699 1056 1795 3373 8799 11613 11614 11615 2048 2173 2127 1805 4267 11616 11617 11618 11619 11620 4133 11621 8244 1803 3377 1810 1840 2259 3260 1874 11622 5520 2004 5789 3335 11623 7787 11624 1329 11625 1254 1141 5266 1630 6701 2009 11626 2064 1903 7028 6237 9710
660 2877 4111 1055 10587 659 2199 6614 1594 4400 1164 1179 9689 2099 3261 1114 6681 4388 1073 4135 1138 4435 11627 10730 1439 4473 7944 1250 1329 1831 11628 1220 2050 2109 1105 11629 11630 1104 1256 2799 7766 1046 11631 9818 6 7404 2009 5826 1050
661 5876 2886 783 3651 715 776 6063 11632 11633 8412 11634 11635 11636 11637 11638 11639
662 2741 694 11 710 2794 1538 4231 69 3241 0 2713 1530 2726 654 827 2757 3426 2772 826 2720 1546 1716 762 2765 783 649 10708
663 645 625 1735 1346 1725 1748 5408 1338 1305 1728 11640 633 1347 1756 1352 1363 10530 9618 1775 11641 11642 10547
664 807 1055 1054 6982 1201 1068 4158 1046 1057 659 1570 2916 650 5781 1060 4526 1624 1716 2765 1545 817 11 654 3538 1049 6663 1518 4347 4231 4310 1006 2908 3422 1033 10847 2720 1111
665 11643 1583 1897 8197 6713 3343 4529 4254 5594 5502 3238 7166 11644 1454 1404 5362 5363 4209 2367 7131 11645 4396 9737 4477 4866 1619 6383 1706 1887 648 1541 652 11294 11646 4030 4103 1256 2972 11601 11647 1818 1069 7043
666 665 1540 4495 649 1549 87 4994 731 2720 81 4860 7585 3582 4111 1852 768 8232 761 657 75
667 3167 700 721 4711 3326 4581 9224 2636 4859 4585 681 4330 80 1549 3507 2720 1003 760 1006 649 2812 11648 1826 2784 6950 4579 11649 1025 827 11650 4996 2964 764 2820 1532 12 979 75 6951 2014 786 1002 81 3245 11651 2706 93 11652 7050 3259 4111 1853 82 8012
668 6237 1399 4168 8264 5219 1118 1034 1043 10997 4076 3359 1870 7287 4137 1119 10845 3342 4891 9747 2080 2664 799 5465 1960 3294 2189 1336 11106 1596 5
669 4338 5124 11653 7188 1439 1835 9433 1251 5781 4887 1143 1060 11654 3238 1153 10870 10739 4529 10879 6714
670 2720 5009 764 710 761 1540 1716 655 657 3507 3430 999 12 696 2897 2777 6159 2179 8171 3290 821 9241 5020 6892 2784 96 768 11655 8669
671 769 1711 786 1532 4657 4862 13 4125 10964 6162 5576 3050 6324 3849 3190 3432 11656 883 11657 4097 5541
672 6635 7341 1855 2422 1157 1518 2593 8394 11658 11659 11660 11532 11661 11662 11663 4030
673 1129 1048 6685 5544 4527 1196 1031 4477 1326 2491 1095 4197 2487 1828 1812 7394 1638 1102 4121 2584 1077 1805 6610 5531 1121 1837 2051 7468 1601 2077 1203 1142
674 1134 904 1146 2916 1138 1108 1031 1076 1378 1389 1391 1420 1100 1386 4205 9660 1137 3702 1404 4376 1109 1479 1145 4447 1584 1439 1440 1252 1441 1073 1211 1322 1456
675 5205 1063 5195 1641 1442 1251 1160 1124 3747 2470 1078 6237 9698 10720 7104 4539 6662 11664 1595 7909 3260 4460 4259 1056 7191 1140 1439 9094 1093 7136 4409 1084 3826 11589 1580 11665 3048 6615 7019 1177 3834 2380 4633 1967 1661 10653 2443 8192 5100 5137 1620 8229 11666 1609 5909 11667 1161 1165 897 11668 3753 9701 11669 1054 4384 1560 2039 11670 11671 4550 4018 9702 10857 8788 7092 11672 11603 1156 799 4538 8768 5620 10086 1898 8798 11673 11674 10688 4415 11675 10780 11585 1189 10618 4891 11676 11677 7016 11678 4875 3720 3344 9691 1145 1581 8769 9397 11679 5473 1101 8777 4343 2008 8816 1948 6982 1119 5566 10091 4299 11680 5580 11681 8763 11682 8810 11683 11646 2173 1070 3744 4029 3415 11684 11685 7488 8797 10250 2221 1587 2172 10591 4667 9343 9808 11686 11687 9779 1496 2224 11688
676 909 1176 4183 7115 1201 5469 799 4180 5535 1206 7751 1135 7908 2222 11689 1056
677 1541 783 11 827 3045 2709 652 710 2638 8531 3422 709 821 5906 4164 657 6133 2019 1717 3430 1537 4241 2904 817 1549 1716 665 69 3167 868 704 82 814 688 769 2720 4991 300 16 8 2763 2739 999 4453 1156 6215 1935 2715 715 7939 1025 10707 7833 2737 785 15 8287 2781 4183 4181 3600 7130 11650 11690 11691 2797 5319 2815 8657 2784 2179 1544
678 4790 7716 7960 5510 1000 655 4657 1853 5682 999 3605 3510 2722 663 821 2014
679 2160 4186 9419 929 2320 1404 1317 11692 4189 1598 5819 4215 6096 6214 4264 1651 2916 909 6106 1441 3287 1101 1808
680 3525 732 2856 719 4928 5506 703 4307 3630 690 10614 733 4092 3568 5319 3615 3680 3500 3493 3650 3616 1933 7609 3784 3614 3554 3511 2906 3597 11693 3810 3312 3253 3799 8313 11694 8660 9173 3524
681 6282 5892 9310 6342 3212 5886 11695 9301 5901 11696 9031 2646 3444 7836 7841 9412 744 11697 10265 3206 8165 5883 6600 6366 2649 3209 11698 9033 754 2647 2656 758 11699 10146 2645
682 2877 6253 1941 4111 4586 711 3167 6197 10114 654 11700 7233 8137 3277 868 3422 11701 4310
683 11702 11703 11704 7747 2835 11705 5271 11706 3681 676 4731 3493 9029 5567 11707 4709 848 852 3318 5400 696 5001 3061 2900 1627 11708 77 6142 11043 9171 10606 5842 2963 11709 11710 2753 3491 1717 3527 6254 2179 737
684 764 11 7961 7751 4270 9 771 2756 2724 1626 2711 5370 10904 10890 4480 4161 807 2134 10315 2199 11711
685 11712 4173 5757 11713 1109 894 11278 780 4343 11329 909 3726 1252 11714 1661 1607 4264 2154 3265 1600 2193 11715 1939 10 4612 1418 1139 8185 7193 11716 11717 11718 10561 8793 4555 8938 11309 5745 11719 11720 10230 1471 2584 1161 2342 7695
686 4015 4016 1598 5213 5195 4621 1802 1818 1094 4037 1160 2548 8770 11721 2384 7123 1175 7909
687 3442 3200 2645 5901 11178 4067 3215 11722 9301 9033 9304 9048 752 9046 11723 11724
688 5186 3504 10651 844 3515 722 3583 2707 8153 10108 6146 6798 3626 11725 8018 3591 8957 5510 8596 11726 4313 3640 2846 3574 11 3773 7961 11727 1826 11728 6851 6729 6036 3608 3317 4927 3525 4796 3788 4976 11729 3695 10998 11730 4981 11731 4943 3783 11732 3778 10437 5868 852 3647 3605 9122 3085 8171 10394 11733 3792 4091 4939 5506 11734 5020 2891 8633 3503 11735 7719 2179 11736 6930 2900 8634 3811 1025 5172 6385 11737 9258 6053 4918
689 1422 11738 11739 9736 6209 3459 4655 4410 11740 1490 9699 803 10681 891 1512 11741 11742 7788 4625 1410 4412 1715 7355 1033 11743 10944 1467 11744 4550 1235 9424 1567 4468 4484 1434 8954 1456 11745 1458 1321 8730 11746 1130 1143 1091 6605 1055 11747 4158 2609 3461 8205 4880 1438 1379 2328 3725 1465 1480 4138 4461 4482 7199 722 87 11748 10673 4454 1393 7992 3753 6688 1662 4390 3749
690 4251 2036 11749 6232 1426 4135 7060 5755 11750 7472 6183 5802 1182 5087 4224 929 5808 2320 5531 2322 2052 4338 1030 1835 10625 2912 6687 7915 11751 7966 3735 6223 11277 10935
691 4261 2026 5538 8202 1331 2678 11752 11753 4102 6615 1965 781 1086 4396 1255 1385 5461 1102 11754 1123 5560 5216 1077 3366 4269 4559 5757 1247 4027 1048 10530 1280 1361 11755 1363 8222 4200 4443 4540 4474 1175 1145 7415 6572 1600 7121 4454 4604 6397 1578 3343 3270 1399 1587 5532 4268 6184 1076 1223 2227 1622 9697 6567 10685 4643 1054 1442 11756 11757 7176 6 11669 7115 11758 3727 9020 2932 11759 8229 2222 6236 1606 4024 8248 1552 8244 1070 2559 1661 11258 8240 2904 8819 1614 5090 1117 11760 628 5439 7663 5586 6177 1164 4387 2910 8196 7486 2293 9837 9745 8955 1688 8261 9324 11761 973 3125 6984 929 3719 9744 3273 1891 9695 1136 1177 2702 11762 1281 3103 11763 1565 1820 7487 2700 1509 1114 899
692 11764 1736 11765 11766 1781 1306 9618 1792 11767 1740 11768 3126 1774 1291 11769 11770 1765 11771 11772 11773 1370 11774 1786 3106 11775 1770 11776 11777 1282 1360 632 11778 11779 11780 954 11781 11782 7729 955 11783 8442 11784 11785 2703 11786 8504 11787 11788 11789 11642 11790 1772 5407 1372 11791 11792 970 11793 11794 11795 11796 11797 11798 11799 11800 11801
693 3173 3189 11802 3194 3179 2927 2941 4709 2907 1717 3277 5906 710 2962 711 11803 8675 2022 1707 2771 6271 2940 3280 1933
694 9504 5792 4906 2849 2640 5058 3562 3515 8153 11804 7139 1711 855 693 5493 11805 8957 3046 7956 710 8977 2859 6781 2871 3284 11806 5329 5343 5507 5268 3533 9542 2832 9978 8556 10406 2883 5854 2895 2869 8018 3819 842 2892 2811
695 10380 5691 2961 8623 6716 6133 9156 11807 11808 2012 2851 5868 2782 6735 7879 11809 4924 657 11378 3612 3641 5148 3513 4921 4280 11810 3601 11811 10469 10372 7894 3356 5233 11812 5069 11813 710 3430 1826 3508 8620 8965 2897 8388 4939 11814 6826 6851 6054 11815 3633 11816 3619 2904 4657 3670 11380 2867 11068 5038 9556 5801 11817 5278 9142 2898 3663 6797 11818 9269 7590 3573 3604 2902 9151 2737 3649 6038 2842
696 1876 11819 5755 1946 4408 11820 7342 1424 2462 1607 1657 5084 1817 4874 11821 4338 3295 1066 2917 11011 11291 2310 4348 5119 11822 5099 1144 11823 4264 889 2110 1797 11824 909 11825 11826 5082 11827 11828 1837 659 1663 1200 5138 4177 5204 6163 4522 11829 4465 5116 7095 4389 11331 2274 11830 1983 1999 4476 1441 1482 1109 11831 5810 4872 8748 11832 6999 7470 7823 1188 4877 3454 10244 3338 1835 4197 1871 2593 1072 11833 11834 1420
697 1518 4338 4200 1053 4408 8205 1149 1136 4141 4882 1031 4128 4021 1141 1399 1646 1837
698 11 4862 3507 1532 710 1006 3584 12 665 3539 1539 771 7880 17 657 2763
699 7977 7017 11835 2071 4360 3218 4157 2192 7283 1984 11836 5772 5778 3746 7975 11837 4555 11838 11839 2666 11366 2255 5219 5788 4300 9863 1814 2036 4357 11840 11831 4608 2914 4176 5459 5642 4337 8730 6604 7563 2605 1913 11841 11643 915 1696 2389 8559 11580 8782 10653
700 1323 11842 4103 1797 11843 6215 1808 909 3825 3820 4626 11844 11021 4158 2559 4186 4630 1440 3722 1321 10247 11845 1109 6241 1640 9748 1476 5817
701 4114 9714 6583 1807 5819 11846 10065 4270 6097 1053 7552 8563 11716 4205 5199 1898 2120 2609 2363 3335 2320 2330 2614 1983 5548 4147 1119 11847 3346 10785 11848 11849 2072 11850 1251 7448 1422 1089 8200 1795 13 7302 11851 3747 4132 11852 11853 11854 11855 2204 2044 1426 11274 11856 11857 11839 2623 11858 7481 2573 2502 10620 2581 11859 7483 9757 7925 11860 3337 1828 9430 11861 2508 11862 2292 10765 2404 2036 11863 5835 11864 1212 11865 10939 11866 2468 11867 2082 11836 2358 3234 1982 3715 4369 11868 1031 10932 11869 1936 5079 2080 8942 1976 11870 1496 1886 11871 1916 2115 1220 9631 11872 10093 5117 11873 11874 11875 3294 11876 2326 7973 5463 11877 1638 11878 8558 10767 11879
702 7492 5116 1392 9091 4517 8205 1239 4513 1797 3702 4465 6118 4653 11819 929 7274 4207 803 4871 7017 6634 5639 4215 6214 6229 11880 6211 1655 4602 1658 1737 907 4264 10647 1652 11881 3724 1214 10327 10654 4388 5610 1441 5644 1451 1074 4169 1121 1109 4183 7770 5536 6180 1418 5570 1439 1388 4425 2618 1432 10361 5833 10683 7470 1647 1329 11882 1242 6077 10856 1076 1478 4528 11012 6115 6111 6622 894 5199 9705 11883 11884 5257 9380 11885 1506 2632 11886 11495 3705 1493 7501
703 11887 1782 625 1302 1306 11888 5429 969 5450 1724 1742 5431 1722 1287 3327 638 5435 1280 11889 11890 1732 1743 1372 10530 1757 1787 11891 1775
704 4731 2851 2814 1001 648 2736 3484 1528 7938 1536 7876 2729 11892 2706 8290 9557 9989 7545
705 1711 11893 676 721 2851 4500 2012 4864 11894 9012 4590 5393 11895 11896 5383 8750
706 5907 3425 7210 663 6119 6625 2962 4586 6122 2742 2797 2851 3356 800 80 1683 87 662 2014 4582 737 7164 11897 3489
707 2765 1540 783 3479 821 16 669 5329 2019 678 92 8606 10052 8137 2904 787 15 8287 4936 9504 8392 2902 11898 656 1544 4500 2798 1717 2769 1683 69 2767
708 4182 5140 4601 5100 1235 1561 4412 1110 4359 11899 11900 1085 1198 5755 4257 11901 11902 4567 1134 1150 4348 2509 6603 1547
709 2330 1638 4104 1843 1836 10767 11839 11903 11904 1927 11905 2110 1991 5778 2666 5745 2281 2162 2192 7517
710 1549 868 827 87 6652 1716 81 4860 6253 981 2014 3291 764 3045 4981 649 710 786 6109 3167 845
711 1102 11083 1128 781 11906 1389 1645 1640 4388 2911 6572 1467 1646 10654 1138 5465 1172 11004 1070 1441 1143 4114 4486 1379 4515 1932 1145 1080 5215 799 1420 1114 1060 5586
712 1837 1162 4218 5140 4263 9025 4528 4183 4357 1097 1156 9749 8535 6213 4638 11907 10621 3218 6189 7198 5833 4028 4347 1196 11908 1467 4199 1652 8224 1034 4627 2345 6092 6108 11909 1799 7296 2609 4202 2199 3268 1426 1327 11910 5641 5092 10683 7699 1241 11012 1429 1254 9379 6635 1109 5830 11911 661 11912 4647 4158 4336 1055 4194 1317 1315 4335 1111 11913 1130 4172 11914 4350 4560 909 1336 11915 11916 7117 7252 1067 3830 4564 1329 1654 9706 1459 11917 7697 6249 6609 11918 6247 11919 7107
713 7808 648 4915 698 1546 3503 4501 2835 7446 2179 6134 2709 4271 2017 9507 1717 2641 737 3667 77 709 690 650 11920 821 5057 657 9217 1853 11315 710 3760 2928 3129 768 3045 811 4164 6124 9218 3759 4919 653 8972 1540 5009 2959 716 5353 4089 4586 3423 668 11921 3605 2964 11922 852 3626 4939 10868 6385 696 3536 4927 3767 10801 6061 715 8283 2814 3539 7445 3593 11923 3493 5905 3763 3578 4301
714 1684 1529 8 2712 709 3423 737 662 4995 1717 2792 656 10080 2930 4330 2757 5906 1528 2017 3129 4981 1540 649 817 3497 813 8697 827 710 665 1682 6142 6197 7745 7875 85 8171 69 2724 11 761 2813 1535 804 5358 1532 868 3167 1853 88 2709 973 1443 2714 0 669 657 8172 2737 2720 711 11924 650 654 81 765 721 769 10071 731 1546 6657 771 2753 2759 2941
715 1540 6120 2017 7424 96 4111 712 70 4981 3497 814 2814 649 2739 11 84 721 2759 1546 7608 2014 81 82 2851 10862 2737 2744 2179 4995 2925 4330 88 8 8171 2748 7231 1536
716 1351 1724 960 5423 1340 1299 9618 641 632 1723 1782 8440 1773 11925 1740 955 1298 1735 1733 1744 1728 11926 7733 11927 3112 11928 11929 11930 11794 11931 11932 8443 7734 11933 3105 11776
717 11934 2361 9850 11935 2771 665 6941 81 1647 1377 2320 5116 5571 11936 11937 7274 4443 11938 2632 4633 11939 6664 5910 11940 1439 1165 4628 7879 3796 704 3072 11941 693 11942 11943 10742 4406 1156 6714 6833 6774 2869 10347 2835 3419 4653 10083 4181 3724 1504 11944 10856 6482 6447 6712 11945 676 3735 4032 11946 11947 8152 802 11948 6270 11949 5502 3076 6456 4667 8799 10899 11950 7166 6415 11951 7487 6636 6391 4172 6424 8824 4320 9346 6841 7699 7111 11952 1053 11953 6502 1244 1259 8830 4178 11954 11955 11956 11957 4423 11536 1526 6403 11958 1039 11959 11960 11961 11962 4664 1189 11963 11964 1457 11965 11966 11967 6241 1818
718 11301 4939 3570 5666 867 4911 2852 6720 11968 6037 5852 2961 11969 11970 11971 8
719 69 786 8 1530 649 11 3422 710 1549 1535 824 1718 3760 669 817 1685 4978 6715 88 10606 2820 11040 1682 10382 3317
720 11972 9383 2666 3227 11973 11974 11975 11976 1599 11977 11978 11979 11980 11981 1910 11982 11983 2450 7180 11984 9852 8476 2364 11985 5775 2056 3236 11986 2200 11233 5118 2316 2276 3340 11987 2518 930 11988 5459 2416 11989 11990 11991 1055 11992 11993 4334 11994 5469 1838 11995 2279 7793 1981 2545 11996 11997 2447 1696 11998 11999 12000 12001 12002 9425 12003 12004 12005 12006
721 7713 3508 812 9122 2830 6142 4271 10434 980 8549 7352 6766 8018 5693 10617 11707 12007 7432 8550 2842 10214 5244 8530 3503 5360 9256 3423 3792 10074 7811 8341
722 1593 1091 4095 4606 7203 9005 3414 1396 4145 1050 2037 1075 12008 1165 5830 2033 2026 929 4451 9379 6144 2710 3417 1711 1828 2179 4474 3745 1057 1124 1109 1187 1406 12009 12010 696 12011 1378 6092 4618 1077 4608 12012 1645 1837 12013 3740 10349 1043 4141 818 9724
723 657 765 0 6652 649 81 82 814 678 1001 12014 1003 827 1084 5593 1176 1109 2462 1558 3729 1249 693 1538 3684 1717 5685 9244 1860 12015 12016 4963 12017 12018 12019 4830 12020 12021 231 425 12022
724 4169 1176 899 7273 1112 2559 2222 7198 4881 2274 1053 1441 4200 12023 7780 7199 7131 1470 4194 1200 12024 4022 12025 1380 6180 1330 7194 7190 6210 898 900 1249 11908 1442 1250 8816 10249 5518 1240 2686
725 2731 3500 1528 3503 827 648 656 653 769 3241 3129 5504 4927 710 3525 2835 69 657 4866 1540 649 2739 1541 2897 711 2179
726 1639 3381 2581 2150 12026 13 5742 5787 4147 1191 1212 12027 1985 9612 929 5823 1980 1426 11905 2112 11366 4159 7784 4176 6226 1813 5812 5629 12028 12029 10631 8933 5832 4104 10587 2245 12030 4152 3230 9719 12031 11877 6632 11861 2145 1865 11558 11367 10967 1991 5827 10123 5115 7974 12032 12033 2243 12034 12035 12036 1876 12037 12038 12039 2100 2573 12040 4118 12041 8179 786 8725 2065 12042 12043 12044 12045 2036 4136 1974 1927 8266 2091 7551 11239 7482 10672 1825 7301 12046 12047 2490 12048 6223 11251 3378 2556 1806 1890 12049 12050 7471 12051 12052 12053 12054 2295 12055 5756 4217 12056 12057 2501 8729 12058 1225 8885 2318 1874 7180 8895 12059 8896 12060 2194 2404 7563 2452 7178 12061
727 3549 5678 3514 5229 3356 4895 12062 12063 10606 7710 2859 9104 12064 3291 3557 3545 5063 5046 3300 5354 6015 7315 3695 12065 12066 10382 3803 5175
728 1573 2310 2372 1803 8919 5094 9026 7341 2005 12067 12068 12069 12070 2415 1889 12071 2071 1840 12072 2148 12073 12074 9478 12075 1816 12076 12077 1805
729 6237 10650 12078 1208 5540 1076 8359 1129 7516 11555 7084 1604 576 2045 12079 11753 4336 1204 9018 5465 6167 11665 3273 8250
730 1155 1645 5753 6699 2680 2372 1972 1053 11562 1931 2051 1694 2099 1143 1638 3260 1135
731 9942 12080 603 9933 12081 10033 12082 12083 12084 3464 4850 12085 12086 12087 12088 12089 12090 8461 10018 12091 2921 989 1668 5292 7272 10289 836 12092 12093 998 12094 10908 12095 9954 12096 3468 3089 12097 12098 12099 12100 563 12101 12102 12103 12104 3467 7524 6067 993 1265 12105 9929 12106 12107 12108 12109 12110 3090 12111
732 1645 1400 4114 1125 1049 4364 6666 1130 1164 6170 2972 7193 1939 1804 3456 1421 1152 9736 1378 1971 12112 9007 5466 5603 9230 9698 1512 6605 12113 10317 7993 8724 2033 4113 1388 6206 7474 3357 12114 5257 2143 5362 6218 10329 2011 1377 1890 1903 659 4879 6096 1239 1050 1031 12115 8236 1391 1486
733 4435 5518 1054 4193 1609 9468 1318 914 1645 4016 9784 1253 6701 1399 1043 9440 1045
734 1537 981 4246 814 4979 3506 762 2179 2897 1446 6926 653 760 2813 9270 1826 1005 654 655 696 12116 6715 3128 12117 6721 860 768 785 685 2803 2708 792 6899 9366 12118 4963 4904 10407 9564 12119 3311 843 7261
735 1385 4560 5768 4880 1393 4877 1072 1053 1422 5526 4544 9468 4144 1119 10649 3753 4630 894 12120 5134 9545 726 3490 1629 1441 3461 3742 9702 1384 3744 8152 1054 2470 4017 4030 5100 4120 1598 1177 1249 925 1250 8197 7017 7910 11020 10362 1486 6606 4177 8258 7937 1244 1320 6569 11596 5227 4874 3736 5640 12121 5108 4601 1245 1317 5471 1638 6220 1587 1502 1100 1176 1623 1487 1468 1069 1130 1141 4459 5462 4376 12122 11675 7876 4477 1651 919 1534 3629 9121 5012 12123 1554 12124 12125 7098 8556 6134 11284 4799 10591 12126 4257 12127 12128 2804 12129 12130 7123 12131
736 821 981 4330 709 4589 1682 1718 17 2763 771 76 93 2964 2775 0 1546 81 656 8312 845 2014 3525 769 649 2739 648 69 2874 2941 2791 2867 77 12132 721 2781 2756 1532 710 2794 5004 1542 2751 11 826 2766 650 1540 4316 852 774 7046 2936
737 1196 1802 1962 1887 2033 3218 7302 2341 6267 6231 4516 7287 12133 8885 12134 3715 3706 5743 2243 2493 4337 13 7290 2299 1972 5757 12135 7751 4256 4872 1134 4569 1518 1149 1117 4160
738 5803 10769 1196 1638 1793 12136 2445 8881 2292 1814 1220 9446 2372 1840 11310 1407 1932 11347 12137 12138 2149 1981 9780 1974 1639 1568 6679 12139 12140 3227 11868 12141 10628 7309 7468 2932 10054 2040 2118 7519 6259 5265 6235 5460 12142 3374 930
739 9213 7646 1619 2195 10251 9795 9464 1121 1110 1439 3705 4331 2782 2936 4233 776 2791 774 3425 7002 4667 5465 917 8385 4158 12143 12144 2686 1894 12145 8219 11329 4881 1476 12146 2468 12147 5634 10255 12148 12149 12150 1643 11961 6415 12151 12152 8376 6173 1084 4891 12153
740 861 4332 2740 2772 5148 2020 10047 2964 3695 2833 9214 703 9219 2715 726 7880 5720 2900 5865 11729 5666 10371 3606 2826 2904 11052 2801 2815 3615 3130 701 7874 8972 10805 5674 3772 2886 6034 12154 6747 12155 6625 772 735 2854 5069 2831 3668 2864 12156 11302 12157 1934 2796 12158 10385 12159 12160 2896 2895 3680 3309 12161 12162 5272 3689 3800 2783 10394 8616 3792 3255 4933 6046 12163 3650 2170 6043 11073 12164 12165 3804 11395 12166 2014 4503 5320 10408 12167 9550 6061 3502 12168 7411 10806 7811 1548 7239 9584 2757 10504 762 4921 2845
741 830 989 611 841 12169 12170 591 608 12171 12172 578 12173 5164 12174 12175 593 8139 8010 12176 12084 12177 12119 10905 5393 6637 12178 10019 12179 5165 12180 10291
742 7662 3476 558 10028 5315 569 12181 622 1541 1271 12182 7998 12183 12184 9485 10035 12185 12186 4698 4680 8007 4675 4844 557 4674 3468 12187 12188 576 9954 12189 12190 12191 12192 10008 12193 12194 7530 617 5292 12195 12196 566 12197 12198 10032 1672 12199 12200 10043 562 9929 12201 10019 8002 565 12202 12203 10042 5163 8003 12204 606 12205 10029 12206 10907 743 784 2902 3090 12207
743 5184 949 952 8122 3408 953 4056 940 3399 947 4574 9071 4061 4053 1 4055 4047 3406 932 3389 4982 8123 936 4050 8119 4048 4045 4044 11371 7264
744 4365 6077 1409 8195 7799 4304 1385 10642 1797 12208 11908 4642 909 2610 4138 1453 4218 5641 4128 4653 4544 6111 7299 1693 11012 6573 1200 4376 2609 4130 4647 1156 12209 12210 7888 1426 7306 2184 8722 2025 4308 4270 1152 6214 918 1109 10945 1441 3739 9706 12211 1111 929 6069 1432 11440 4227 1053 4873 4032 4361 8226 4876 3702 5542 1661 12212 4399 1440 1329 1414 4422
745 6332 7855 9031 751 752 6316 5901 9033 9049 12213 3200 12214 12215 9042 12216 5883 3214 6310 8568 5888 12217 3437 12218 12219 10722 12220 12221 12222 6301 11214 12223 12224 12225 7856 9306 10205 3203 12226 756 6356 6593 10764 9412 6351 12227 5877 7836 9998 12228 6331 12229 4685 12230 3302 6348 11182 8166 6366 8094 9997 12231 8106
746 4586 3045 87 7596 670 714 7412 6717 12 4862 1532 2715 1001 2722 4332 3355
747 10148 8090 12232 4722 11195 2649 10183 4070 12233 9306 6284 8522 12234 12235 8523 6342 3437 5877 9035 8166 12236 12237 7856 10264 7849 7855 10263 4064 4718 8517 12238 12239 10151 12240 7851 12241 6288 12242 12243 12244 12245 12246 12247 11180 12248 8515 6374 12249 12250 8093 10150 12219 12251 12252 12253 5892 8164 4071 12254 6351 12255
748 4846 3476 1269 1672 829 12256 9955 1313 611 10032 558 988 12257 5294 4843 3089
749 10847 8 1682 7608 87 821 9087 2877 6950 3546 7585 3326 82 4111 2947 10368 12258 2019 85 4585 3133 300 480 199 12259 227 5927 404 306 3399 940 1058
750 12260 768 9050 821 6770 2896 12261 6729 12262 7055 5350 6198 7743 12263 2020 4271 7138
751 4390 12264 12265 10348 6406 12266 4618 909 12267 1252 8991 4608 8210 12268 6184 4392 11565 3839 12269 12270 1111 4515 1229 12271 12272 9009 9705 8999 7822 12273 8253 12274 4343 5643 6394 7790 2333 12275 10741 8721 8786 4218 5519
752 1598 4388 5191 1393 1187 1971 3749 3271 1143 3716 8810 3746 1818 1639 1158 4435 1429 3269 1317 1128
753 1439 3753 7487 9738 1053 8244 12276 2686 7910 1554 2293 4108 2916 899 11910 660 10653 4027 1604 2227 12277 6 661 4435 5218 4018 3834 9016 11615 1172 1056 6092 1161 3269 7161 5223 5217 7136 8778 12278 898 1479 11940 1330 2701 12279 903 1170
754 3483 749 3836 3838 12280 6140 12281 12282 1029 10585 4557 12283 1084 1189 1049 12284 1772 12285
755 1145 6234 4881 1922 12286 9048 6301 12287 12288 7836 6288 6332 9992 2653 12289 10578 7849 5877 9300 12290 12291 7845 12228 6316 6334 6356 12292 7859 12293 12294 5901 12295 6594 6377 12296 6348 8376
756 3266 12293 3206 737 4996 1718 662 4705 2775 2179 15 8 2017 2902 6653 11 2737 3245
757 5056 6017 736 10608 6801 2012 9235 9979 8671 3567 2859 7595 3683 90 8616 9552 3779 12297 11732 807
758 1336 5608 5833 1380 12298 1037 12299 6531 7627 4169 1248 4441 12300 11501 1457 12149
759 3395 948 3389 951 7214 3411 3407 4048 4049 943 3391 5259 3398 7212 8507 11368 3405 935 4982 3393 3388 3400 7268 8118 12301 949 2 4063 4047 7264 3410 932 3397 4054 3408 938 3399 9880 8127 946 939 3394 12302 1 4986 4044 7270 4041 7269 4052 3402 940 937 4059 7271 4039 7267 4050 8119 3401 4042
760 1386 1376 4212 1378 1126 908 5755 1467 1108 12303 1202 1649 4343 1141 1429 1090 4548 1104 1138 5786 1317 799 1101 1391 3705 1122 3745 4877 5364 1512 4138 1393 6097 2330 4880 1149 4141 4203 1903 1455 1109
761 5753 7253 1887 5809 5630 8176 3745 8360 1410 1077 4516 12304 3227 5460 3742 1894 10274 2052 2111 1323 5788 1802 5790 2512 5603 11242 8188 7276 1899 1065 4544 1953 1176 9313 1793 6212 5776 6630 2110 6096 7159 4882 6182 8928 11568 4604 5530 5582 1471 8347 11592 3367 1172 12305 5636 2236 7294 2033 6243 1055 3342 4178 925 9094 10324 2584 2191 10873 8475 1111 6187 918 1105 12306 1905 12307 4200 1407 6247 5451 12308 2274 2509 6681 2299 5522 2203 7080 12309 8933 2270 2255 2192 10631 5787 12310 2303 3341 5142 1116 2259 7299 3381 4523
762 1541 1682 7722 7597 12311 2019 5906 3421 4791 12312 2821 2794 771 737 12313 1717 4705 3640 3069 10049 9389 868 8392 816 8414 2716 6156
763 2820 2720 6819 2965 827 1532 11 3426 710 1716 999 1006 5072 826 2780 1025 2806 694 2742 1003 2800
764 3167 827 1682 1536 670 1707 2818 3430 16 657 12314 75 2014 6119 678 4111 93 3244 10890 6254 12315 4497 12316 87 6252 786 12317 3432 995 4684 985 4686 608 4675 12318 709 2791 711 2806 2859 9087 652 783 2805 1529
765 4834 12319 436 440 4819 106 9969 4806 4821 4832 472 176 9591 2988 12320 64 457 5975 9515 475 12321 5958 169 12322
766 2756 3591 3290 2787 9240 4091 2781 2835 776 4500 6765 2895 3313 5001 1003 4498 2725 2799 2865 2859 3792 3647 3678 6057 2020 3636 4937 5173 2803 5794 2804 12323 3771 10818 3790 3309 3788 5876 11302 3807 1446 6815 762 4976 2851 4949 4305 2737
767 69 2637 4495 1853 5687 2019 2179 1540 669 1710 2830 2846 2800 783 3651 1826 2892 12 743 4301 3500 1015 852 1837 2014 3788 3647 11073 2897 773 2904 12324 12325 656 12326 2706 6718 6655 3649 12327 8279 2801 12017 8693 9989 12328 9986 12329 3305 8756 10752 12330 12331 2558 8205 5326 12332
768 1648 799 1327 1721 5833 6215 3831 1149 5515 1406 1441 1317 803 1174 4183 1084 4548 4482 1455 12333 5256 6190 1320 4517 1126 4462 12334 11747 2973 2970 1250 10650 4630 1457 4450 4144 4515 4527 1465 7822 1968 2052 11020 9209 6974 2134 1492 1558 8845 10623 12335 1511 12336 1436 12337 8772 12338 1249 4338 1162 4160 1489 4569 9424 10790 12339 6097 1394 5126 1104 4224 1240 1244 2106 1646 1090 8792 1437 3732 2362 10659 9061 1039 12340 12341 4257 12342 3820 11326 12343 12344 12345 2054 5545 7794 6076 1385 909 924 10643 1497 1922 4357 8205 1522 7065 12346 12347 12348 6943 6490
769 11875 2408 6680 4346 8882 2334 5596 12028 1070 1602 6162 11859 10081 2330 1927 12349 11313 7250 2972 4479 12350 2684 11864 7481 1888 2162 2145 1426 7273 2096 2465 6207 5825 4521 12351 4118 12352 7966 11276 1946 1191 929 6206 2026 7542 3462 12353 11871 12354 11861 11857 6607 12355 12356 12357 3452 12358 9476 3268 4177 12359 1111 2320 1418 12360 3359 4264 8906 9614 1965 2501 11558 4116 11834 1870 12361 7155 1441 2143 1924 2226 5824 6695 1832 1926 2265 1892 2328 3344 12029 2191 4297 7925 6242 12040 6223 4876 1455 1890 7302 12362 2678 4199 3333 12363 7284 7543 12364 12365 6195 1217 2186 1084 1030 1512 12366 11591 8189 5220 8904 1109 4136 1803 1837 1459 4353 11277 2383 2431 5781 1873 9725 4327 4132 7467 1887 2110 12367 1439 2059 9020 8938 4544 1122 1186 4538 1143 2093 1094 5620 11846 1871 2001 6681 1089 12368 11253 2395 2036 2160 2466 3294 4261 7468 9757 1886 6166 12369 11333 10641 2236 1807 2008 1119 12370 2069 7458 8262 6991 9738 1994 4462 1134 1240 4143 7196 5136 1939 4375 7973 9826 7084 10670 6985 1613 1694 1833 7474 12371 1481 1964 5007 1810 1509 8926 12372 10781 8469 4542 9662 12373 7278 1329 8561 3376 12069 8201 1696 803 2087 3747 5910 12374 12375 7161 7297 12376 12377 3260 12378 12379 12380 2933 2082 3453 8203 2089 7094 4252 2004 11023 1951 4401 12381 12382 5258 10655 2470 8796 1686 2681 4387 11901 2158 5782 4359 12383 12036 6264 12384 8933 2195 8892 3357 12385 3216 6239 7291 4299 1800 13 4180 2363 4395 12386 2079 8724 1881 1905 8472 11310 2475 6262 1862 12387 1869 12388 1996 6986 12389 1975 4404 4348 12390 12391 1203 1062 906 1715 12392 12393 2088 4406 1114 1138 1874 3381 12394 2269 1159 6071 3370 3346 2916 2278 1249 10949 10623 3371 5776 1702 9456 2573 4334 12123 10644 9061 12395 1072 12396 12397 8193 6499 2130 12398 1460 9712 12399 1661 4217 4384 2103 4357 4608 12400 12401 12402 12403 7187 12404 12405 12406 1413 12407
770 6189 4444 4454 1486 7198 2972 4201 4114 1239 3839 1659 12408 12409 4032 929 1104 4347 1226 1412 4364 3726 890 1429 1190 1075 5809 4515 1145 4221 1993 1030 1643 1153 10348 4353 1622 6170 6092 1079 3742 1051 4173 1053 4168 4129 1247 1109 7902 11917 1385 4548 8535 1112 4375 1994 4538 1406 6685 1317 1140 2632 6204 4376 1149 12410 1440 2255 8195 2274 4198 4219 4415 911 7274 7464 10066 12411 8812 2036 1091 1043 1952 1558 1129 2680 2974 10350 4433 1251 1138 3725 1101 1327 5599 6702 1598 7561 1828 7199 1124 12412 1378 4512 2376 10361 1322 1424 1253 6229 4144 1455 1441
771 4830 5916 164 12413 10307 12414 220 219 35 8025 42 12415 436 299 40 5914 9598 4806 5923 5925 5550 12416 12417 12418 367 172 5922 292 4725 12419 12420 120 5931 19 4839 4886 440 9515 12421 532 12422 12423 300 161 12424 4808 315 297 12425 476 417 5919 4750 3029 266 5939 410 22 5932 233 2987 361 304 12426 12427 2983 457 259 12428 97 357 149 504 5950 12429 5924 9596 12430 12431 12432 8026 12433 112 12434 12435 12436 12259 363 72 296 4826 9969 62 4749 4840 323 9926 12437 12438 12439 12440 258 41 240 50 5984 12441 104 12442 4836 12443 5977 12444 4842 4832 12445 427 4817 136 5927 472 29 238 4837 221 5992 8024 9591 130 5970 10310 2981 9509 468 153 4810 322 12018 9517 12446 181 249 6001 6013 12447 51 47 4812 12448 48 12449 12450 5990 2978 12451 12452 189 113 12453 25 355 12454 9645 477 10630 12455 12456 260 12457 6000 485 139 376 382 354 12129 12458 380 257 204 306 347 4889 248 12459 132 313 12460 309 12461 401 227 154 103 4833 3839 5987 222 9599 3032 548 12462 230 9605 12463 12464 345 174 12465 12466 12467 432 12468 12469 3044 12470 531 12471 456 6005 6003 450 12472 12473 275 481 12474 12475 12476 9595 329 2999 5554 12477
772 12478 6517 9385 9005 1837 4551 4893 6609 1045 1239 12479 1380 12480 1393 1231 11311 7968 6092 1426 4532 6290 1800 4350 7907 12481 1324 1075 7464 1657 12482 9001 8995 4552 4095 12483 4183 12484 10717 6105 12485 12486 4440 6424 1108 4234 10562 1983 5130 826 10958 12487 12488 12489 5592 2462 1715 12490 12491 12492 12493 12494 3704 5258 1122 12495 1993 10352 12496 4876 4530 12497 5634 4560 11078 12498 782 12499 1402 891 4877 12500 12501 12502 10957 1323 12503 12504 12505 10954 12506 12507 6190 6491 12508 13 12509 1817 12510 10961 11079 12511 4144 6209 4219
773 5628 6562 4191 4032 1644 12512 4167 6108 4210 1154 10857 4198 7825 1453 5812 904 11324 4135 4488 5191 8563 3366 1463 1817 1220 2041 8184 2142 10756 2254 1245 5125 12513 12485 4639 5470 3720 12514 4555 6564 7822 1041 12515 11550 12516 12517 12518
774 6688 2320 12075 1995 11233 12519 3708 2025 1800 12520 12521 1084 12522 12076 6162 11935 7482
775 788 12523 163 12524 4488 6204 4531 4608 5110 1152 4108 6972 2765 2179 2936 12525 4546 1201 782 1046 4491 2093 4483 1170 1155 7936 773 2815 1541 3245 2810 7262 2706 12526 12527 521 661 12528 3274 1044 7038 7759 11962 8921
776 799 659 6250 7918 4326 1114 1775 1346 2676 914 4458 7155 1486 1053 1321 1253 4538 1888 9229 1136 4327 4521 1438 1068 1030 12529 769 4500 2012 2017 770 772 4332 8077 2709 9783 2721 711 84 4263
777 8205 1157 4991 2744 4685 722 8156 4980 12530 12531 6629 12532 12533 3208 807 2964 2769 2830 4237 3638
778 6772 7810 6626 7442 5693 12534 6124 7718 5016 12535 4081 739 3767 3506 3769 12536 10811 12537 10469 4916 9136 7109 12538 7710 9219 4091 12539 10893 12540 4962 6123 12541 6766 3579 3552 8585 7350 7722 4314 10218 7597 12542 654 2897 693 7583 12543 7806 6918 12544 2753 6814 2835 12545 5799 2963 2019 3488 7960 12546 11817 12547 11061 12548 10599 3792 5277 12549 11433 12550 10447 12165 3635 3570 3532 3284 12551
779 7975 3750 7339 3372 1639 2491 2747 783 4094 2794 1953 8201 2678 1598 1640 8563 7977 8917 1057 9629 2389 1518 9747 3340 5790 9027 1240 11547
780 12217 9992 12552 12553 6357 10173 10062 5892 11164 3215 5029 12554 650 12555 12556 3208 6312 12557 8514 745 8164 6288 12558 7836 6322 9046 9047 5879 12559 12560 9307 6330 12222 6316 3200 12214 2648 7855 12561 6332 12562 12563 3206 754 751 12564 12565 6305 3214 5899 3438 12566 6350 6593 1769 6295 9996 12226 6341 7838 11197 12230 6317 8573 6300 6368 12285 12567 5883 12568 11214 8159 6289 6303 6354 5894 1742 9392 12569 6310 11147 12570 6293 12571 8518 12288 6366 12572 12213
781 1442 10636 2916 7977 1425 5629 12573 893 7562 12574 1114 1983 1837 11871 3343 2313 1602 5477 5511 2678 3748 1979 1927 7566 2199 8986 1821 9654 2609 2367 1165 1607 2162 8382 6698 2274 3745 1391 1155 5772 3234 10716 3335 2080 9755 1553 1084 2605 1109 1075 5471 3740 8563 9689 5804 1805 9439 1913 7295 1077 5143 1920 10846 1962 4197 918 4112 9015 7751 12575 5830 12576 2465 5514 12577 4269 1045 4443 1101 8882 5819 1099 2222 1848 1112 4219 9629 2135 12578 11278 1255 12579 10588 4177 3336 929 7254 4270 1982 1803 7256 1946 1808 1050 1990 5815 7786 12580 4203 3747 803 7804 1103 4135 5803 2974 5463 1901 1902 12396 2685 1474 10128 1240 1922 3823 6989 2683 1884 1859 2702 4539 7514 8559 7339 1469 9724 2688 1108 2663 9725 2701
782 2714 70 760 1937 1707 4586 6819 2964 88 722 674 9503 2014 3768 710 2745
783 1031 1051 1613 4251 11083 11292 5139 1439 7 4216 1464 1040 1785 2680 4126 2288 1064 2037 7918 2684 3449 1141 4270 1034 779 4395 10092 10 1116 1451 9676 1324 2093 7558 1057 5531 1381 1913 4473 10102 1250 12581 5567 1247 7121 4547 8272 8182 1109 1138 2199 1640 3272 2134 5640 8964 8959 1321 11665 1002 4193 12582 10003 1253 4399 2700 2593 3425 12583 12264 12584 11488 9678 10096 918 4257 2144 9796
784 657 981 3167 3072 93 1709 768 1024 5504 87 2773 75 710 4711 821 6119 1547 3667 1826 2014
785 1170 8229 1094 656 4321 1135 6164 6167 8236 1172 5577 4868 1590 3287 2928 2718 7918 8248 11619 1204 1195 5524 1044 703 3130 2707 726 738 662 3483 2806 773 3651 11403 69 1015 7658 3584
786 566 4849 578 601 8048 608 557 567 572 563 12206 12585 568 10279 586 565 4691 12586 989 12587 12588 10014 840 12589
787 8748 2154 7561 5810 7971 918 2320 2255 4517 2666 5787 1031 12590 2045 1515 7398 5747 11983 7618 3259 90 2295 9013 7560 2309 2447 12591 2472 6403 12592 4555 12593 8376 12594 12595 12596
788 7811 5681 3482 6668 4919 5057 7806 12007 10829 2782 3525 5016 4953 693 12597 6059 3612 9255 3806 12598 12599 3647 12600 10834 3284 2017 7809 4895 12601 11923 4943 12602 4313 5268 8755 12603 89 814 811 7593 11031 10806 11066 11921 12604 12605 12606 12607 9364 9241 9553 11920 3792 5009 12608 12609 12610 12611 8336 12612 6046 3513 10815 12613 5021 3568 12614 3291 12615 9584 6819 8334 12616 12617 12618 12619 12620 12621 12622 9265 9117 8654 12623 10798 1852 3245 3629 3634 12624 3667 12625 7703 12626 4305 12627 12628 12629 12630 4497 12631 12632 10463 6043 9282 12633 12634 2897 12635 12636 6773 12637 11706 10499 12638 12639 5020 7217 12640 9273 10456 3074 12641 1710 12642 12643 12644
789 907 1383 1391 4144 1322 11311 8253 11821 1402 7506 11660 12645 4528 12646 7627 12647
790 6628 4326 1000 11 1549 710 681 4360 4220 1323 1052 1813 7339 2851 2874 1717
791 4132 1212 2714 9419 2162 4133 7294 2255 2134 11360 5460 3048 1854 4112 4357 1459 1109 8921 12648
792 12649 3214 5930 243 752 5885 5953 5984 3211 12440 12650 227 4808 457 12651 12652 29 300 145 142 12238 401 12653 4806 9307 12654 10116 5884 13 12655 12656 3121 4685 159 12657 12658 12659 205 12660 231 8517 12661 225 4597 61 5971 4842 9592 12662 3032 12663 5992 12461 12664 3436 129 425 12665 12666 8070 4836 12667 6328 12668 339 12669
793 5654 6033 9586 9890 12670 12671 12672 12673 7130 12674 12675 12676 12677 12678 12679 12330
794 2303 7485 1026 799 8884 5776 660 1136 1127 2822 1198 3227 2931 5209 1221 4122 6195 3273 12680 11979 1251 2045 9656 8358 3752 1065 1651 9659 5461 1214 11484 1848 1128 6246 1040 12366 1043 7499 1903 1109 1057 1604 1393 5586 1118 12681 8782
795 669 7880 2737 1717 1538 2725 2768 9474 2769 2904 4314 2765 769 2772 7938 2927 4546
796 3567 2876 11052 12682 10378 3574 6819 12683 3591 3588 3607 6747 2854 4303 3682 2835 12684 2182 3684 5063 3651 10805 3603 7440 784 12685 8639 6844 12686 12159 2906 4802 3678 5503 12687 9540 3807 12688 12689 7894 12690 12691 3630 12692
797 1226 12693 1965 8894 9666 2085 1858 11592 1835 10404 2052 1810 2487 2144 3385 3377 12694 12695 8470 1960 4153 12696 2352 9015 11567 12697 7037
798 1243 12412 12698 1074 1983 891 4206 3266 10059 1146 4353 10941 1060 925 3262 4539 7450 1062 1800 1101 1153 9096 6235 2684 12699 12700 12701 6239 12702 1330 5538 1321 4879 12703 6702 1240 1318 4035 911 10060 1476 2686 3747 3733 6212 7908 12704 896 8207 12705 12706 4334 4270 661 3050 12707 10592 2705 6421 4073 6974 4257 4873 2916 11484 12708 12709 2342 10095 12710 5117 4213 12711 12712 1427 12713 1065 1038 8235 11283 1143 12714 12715 7078 12716 12717 12718 4348 5212 12379 4120 1575 2126
799 4519 1784 4103 1130 3286 920 6577 7008 1594 3050 5538 1094 1721 1181 9055 1800 9017 1109 6190 7187 650 2320 2410 4264 8928 6982 4490 11601 8216 1713 7121 7260 1170 1114 2686 9020 8574 780 6 803 4476 7450 1420 1144 1190 1176 1243 892 6308 2700 11572
800 653 1548 3423 11 2720 1549 654 1716 721 824 810 765 2708 1709 12687 710 5666 2835 12 3590 738 8672 860 4707
801 759 1782 12719 3328 1345 1299 5432 12720 5409 1350 12721 3121 804 786 11704 868 1718 6134 2709 93 7391 1302 12722 958 630 12723 11776 12724 5425 639 960 10724 12725 8451 3331 3103 3206 6343 1772 640 12726 12727 12728 12729 641 12730 12731 12732 12733 12734 7732 12735 954 7736 12736 12737 12738 12739 12740 8496 12741 12742 12743 5433 12744 12745 12746 11781 12747 12748
802 7283 9097 4375 5143 5209 1426 10242 4338 1383 7253 4608 6077 1461 5515 11609 3373 12749 12750 5364 3706 12077 2299 1696
803 710 1001 5187 1853 713 676 688 2964 3167 82 2777 12 4111 716 2748 722
804 2666 2206 5539 5538 10317 7751 11600 4157 6695 10773 1926 760 2344 5512 12751 1053 7447 2481 10765 2298 7395 3135 2200 1946 12752 12000 4555 12753 10931 11878 1592 2409 845 12754 2150 2599 1981 12755 2319 11990 12756 1843 10097 1463 6531 12757 12758 12759 2001 12760 2469 1134 12761 2614 12762 12763
805 3759 4164 2710 3239 739 12764 2882 12765 4927 7703 9114 6385 5727 9124 3767 7609 4915 4078 3307 12766 4271 12629 12767 9127 12768 6926 9135 3072 12769 10839 3423 2895 12770 1004 3799 12771 4895 8585 3284 12772 3770 1018 9981 12773 12774 2891 5018 12775 7442 9364 12776 9140 710 12606 3814 12619
806 4307 3526 1540 727 3602 5501 842 732 3545 3605 5656 4928 3529 726 3549 2964 8584 9112 3504 6709 5042 2860 2012 3612 2835 5868 5176 7949 9558 3502 12166 12777 7313 2896 12778 12779
807 1545 2792 817 2737 11 1716 688 669 868 1532 2179 0 4995 1534 1535 7956 2742 761 7337 657 649 3538 2892 3489 7878 70 696
808 1990 9440 5603 1165 7394 2255 5809 3379 2123 1031 10133 1472 1442 1471 1038 917 4667 10951
809 812 4233 11245 4866 12780 3242 84 12781 739 5235 6391 2775 6053 2902 12782 12783 9087
810 852 12784 11220 12785 12786 2895 690 3248 2826 4331 4301 3651 15 762 703 8626 1018 2902 773 2801 12787 12788 12789 4557 12790
811 6049 666 10420 5842 2836 3479 12791 6708 3762 4949 3614 847 9101 860 3555 8584 3544
812 786 722 0 728 6625 9243 709 2835 1717 5659 3281 13 12792 3351 3495 773 9335 3245
813 1065 1194 9313 613 4689 2012 4863 3422 817 710 7231 9474 2769 1135 1127 4035 3286 2227 7910 1621 1579 2686 9771 2330 1056
814 762 826 7732 3328 12793 1782 12794 1711 1370 8605 1794 3133 12795 1346 5894 12796 7736 12797 12798 7729 12799 12736 12800 12801 11926 3111 7735 5416 12802 3123 12731 5448 12724 8504 12803 12804 628 640 7835
815 3280 3046 88 12805 813 3055 12781 12806 3169 3248 8 771 681 786 5246 87 11286 2902 760 653 6895 6902
816 5828 3488 3239 2928 4996 7982 4396 1051 743 2902 11649 2813 3490 7981 2012 6134 3512
817 3772 7741 1937 5069 4862 4927 4919 7806 3584 1683 3567 12807 3572 12808 703 94 9240 4894 3525 8595 9541 4895 4086 11376 5057 4928 3767 7874 2017 12536 8012 10998 10374 12809 2179 7739 652 4312 11384 2851 1004 1627 2801
818 3525 3667 3759 3628 3590 12810 6385 1540 773 3651 981 1853 1018 12811 4164 2902 10383 3284 3802 3647 3592 7425 11735 2170 3245 2851 2015
819 1058 4882 1566 2822 1145 1068 1558 7121 1050 781 1048 1109 1117 1065 10283 12812 10262 8517 5883 11180 12813 8093 6374 12814 2652 7845 12218 5892 6344 12556 6350 6351 6356 10183 12815 12816 3209
820 12705 799 4348 3702 1254 12703 1518 11712 3749 1030 12817 1252 4168 5525 1412 7199 4144 1837 1656 4364 1087 1457 4544 4158 2915 1797 2125 929 1334 12818 10270 7196 7889 1129 4338 10145 6187 4173 1240 1109 1761 2686 4412 6569 1509 4415 2603 1141 5518 1245 1404 1200 7198 1250 1053
821 1533 2770 1665 4843 4698 565 586 576 12819 12820 6145 12821 4163 1001 787 711
822 3097 1747 12822 646 10531 7735 9616 632 1351 13 628 626 786 3121 957 5411 12823 300 5441 12736 10518 1359 10521 12824
823 1051 1055 1053 2663 1075 1805 1056 1048 1104 1247 10056 3275 1424 5108 4881 1439 1143 1111 4463 5786 1249 1386 1057 3740 1084 1460 4338 12581 1509 1425 1103 1242
824 1716 1628 2749 4899 3572 807 5045 769 764 2744 763 3083 2723 12825 12826 2775 721 12827 15 8 12828 2794 2729 3251 2962 11894 12829 800 12830 2867 2761 12831 300
825 2785 657 5188 696 656 670 76 12832 4657 87 92 3594 4256 12833 8724 12834
826 821 76 724 713 5682 4956 3506 11303 1446 6109 5849 10195 80 12835 6053 8924 767 3783 88 8620
827 9591 3628 156 181 12836 139 2982 132 50 6001 12837 4811 12838 9918 401 12839 176 306 47 465 4889 6003 9516 543 5984 506 12840 12523 12841 3000 12842
828 981 7608 710 3519 4582 3701 4111 4382 12087 1707 7711 7056 81 5350 10942 8303 12843 4585 2941 3536 2791 860 4980 4233
829 5619 1031 1050 1049 1651 3456 1418 1084 1058 11477 1142 4205 1062 9313 6665 6232 4076 1045 9020 8188 7485 1109 1661 1412 1646 4157 12844 69 77 6241 5471 1189 2866 1904 9664
830 12845 12215 3442 3436 3201 6019 11161 11698 12846 2655 11213 2651 9301 9036 4718 2646 8165
831 622 619 573 10032 1269 563 12847 3463 12848 3476 12105 1312 10014 608 835 2921 4858 4706 7538 8460 2924 991 1273 5294
832 5017 1550 827 5668 5692 685 5148 5488 88 697 2855 11 5680 2179 5669 769 3061 3311 12849 87 10920 8171 6274 0 6941 694 4904 7830 4304 12850 12851 12852 4800 8898 92 722 765 4311 665 814 6715 9491 10071 826 1002 5702 5871 761 4994 3280 3429 1541 2857 811
833 5463 3343 9898 1257 12853 1240 1913 904 1330 12854 11832 12855 12856 8830 2403 11980 12857 1066 1930
834 1535 69 1530 4164 3057 5057 82 764 868 649 11 688 814 1006 2755 4246 743 75 12 2012 3291 765 3284 2720 3570 7651 7978 710
835 669 674 868 85 87 681 688 12480 2917 2095 10062 9992 12858 7836 10370 12543 10218 5247 769 665 716 12859 7428 1682 783 12860
836 5193 1835 2127 1117 1611 778 1615 5811 904 7121 4259 1084 1129 1090 4160 1031 1800 5204 5757 2191
837 11379 7280 5496 3577 3819 10610 12861 5063 11026 6887 4091 2869 12862 9540 12863 4964 4952 11428 6756 3528 7079 12864 6753 3063 5649 3644 6748 12865 3602
838 981 2748 8019 710 12866 2936 2014 1025 2902 4705 12867 1499 8715 1829 810 12868 3284 2786 4557 3352
839 4390 1569 7283 654 4608 11754 7277 12869 1696 9422 13 12138 12870 2255 1694 12871 1245 12304 2510
840 2978 41 151 19 5948 9920 4806 12649 2989 5962 121 12668 12455 306 303 5993 12872 10852 6003 329 12873 12874
841 1111 7763 4517 12492 11822 12875 1839 6534 2482 12876 12877 11978 12878 12879 12880 12881 9822 6068 12882 12883
842 3519 696 2836 2967 3763 3626 5691 3503 668 10605 12884 3667 3759 715 5232 743 3525 6708 12885 3591 3794 12886 4091 3795 3683 5068 12887 2786 2964 12888 3545 4577 1018 2887 7890 3253 3803 4919 6385 12889 4503 3799 3766 11306 12890 12891 5021 8633 7432 12892 3651 2905 11396 8326 699 8434 4863 3082 11056 8603 12893 12894 5383 6198 8684 5393 697 5380 12895 12896 12897 7643 2706 5371 3554 3317 12898 9553 12899 11921 8696 7715 12900 3700 7947 12901 3615 5698 2900 10452 12902 846 12903 5845 12904 6722 3061 11409 12905 6826 9583 12906 8406 7435 1446 12907 12908 12909 8695 11895 10470 5181 12910 2182 3311 12911 10212 3788
843 4297 1252 12211 1837 1322 4323 2030 1048 1177 10643 8152 1989 6111 12912 1249 12913 4662 12914
844 4395 3705 11859 7800 4569 1066 1075 4138 1385 10713 4072 6166 5202 1465 8721 4628
845 2014 2851 2925 772 1002 82 4994 696 1716 762 4511 813 4326 710 5231 7938 769 783 1003 708 763 2012 1540 11 868 3277 2179 4585 2902 3418 4980 3817 12 12915 6271 4101 1025 2797 693 715 94 3510
846 722 5069 2020 12916 12917 702 3606 4976 5913 7645 8630 7643 12918 12919 7241 8649 981 11409 10409 12920 12921 10391 9573 12922 3814
847 1198 4179 12923 3839 1054 4544 5143 892 1838 4339 929 4441 10317 1558 4198 1622 1661 2681 1109 6567 1152 909 7751 1889 8189 4615 9093 4633 6550 9850 7485 4181 1165 8236 1207 1928 9095 4209 1518 4450 8891 9756 1459 7153 778 9721 10941 1050 2932 7121 4270 1210 1043 9020 1615 1156 1223 4621 9763 6237 4422 4178 1596 4336 661 781 761 4308 1633 2047 1226 1145 2911 1189 1130 1253 1202 674 5517 1051 2093 1052 9718 2050 7000 1628 8265 7111 1567 4125 891 9710 1090 3371 4613 7944 2933 802 6 3542 9018 9738 1250 1822 824 1143 1057 803 1031 6554 1146 4470 12924 3050 7187 12925 10644 9768 3379 4106 1138 1242 1134 12926 5826 7498 1255 1318 1261 7211 2290 1913 1556 1397 1513 1616 12927 1038 10092 10899 10096 1141 12928 9713 8271 12929 6492 6465 4662 6490 12333 6614 12930 1259 4375 6403 1114 1526 2386 11908 2969 12931 12932 1478 12933 8242 1257 1101 1204 11885 8534 7802
848 9414 4541 1645 4418 4135 4176 3456 1058 1406 1071 1924 1155 4339 1060 10326 7751 1442 12934 7485 3750 4024 7394 4128 4076 1203 4301 5490 981 81 710 6713 9020 3055 1696 1404 1578 8355 8912 9758 3371
849 2766 10213 3593 4303 2926 4101 768 5054 5723 8013 7950 710 743 5063 3323 9240 7338 7432 8526 5273 12935 3490 5278 2853 3590 12936 4091 6772 12937 3819 4974 3807 4964 10382 4498 12938 12939 9559 9235 9553 12940 12941 3669 4978 9542 3782 2847 12942 2869 12943 7828 12944 12945
850 1541 2874 93 3507 788 1548 1104 1482 3425 1072 657 4511 1109 4455 3703 4244 2769 3121 2741 11294 3490 12946 7978 665 652 786 1542 2772 632 300 12947 311 61 240 12948 12949 765 1716 12455 3042 12438 12950 10531 12951 1794 6308 13 891 12952 1774 1351 12953 12954 10183 12557 10394 12955 12956 3 1087 5228 8702 12957 6024
851 9946 596 7321 9942 991 12958 983 995 601 4844 607 2922 4693 10292 835 608 7661 3467 5287 12959 12960 12961 12962 563 3470 5160 4690 1673 2923 4691 10016 12963 5298 605 10289 12964 5301 12105 7997 1275 3092 12965 9929 4687 12966 12196 12967 10025 2921 1681 1671 586 622 12968 5295 10033 4843 4857 5292 1668 10277 12189 9932 560 9483 1276 838 8007 12104 12969 10909 12970 9485 12971 12184 12972 12973 1268 4846 3476 12974
852 2921 997 8458 986 4689 586 572 12975 10290 575 983 91 1001 760 12976 12977 4057
853 73 768 8576 1707 7830 981 3689 5870 814 3317 4711 2965 2851 12978 2835 812
854 981 4860 12979 2012 9266 5854 2894 797 12980 12981 12982 8671 6020 12983 10490 12984 12985 5858 12986 12987 1018 12988 12989 12990 7261 9286 10219 3811 854 12991 12992
855 4186 12993 11553 12994 1887 9902 7554 10785 2129 6636 4157 12995 1696 930 2596 9900 9227 5 12996 2092 10635 10876 12997 9778 1976 1825 3236 7339 904 12998 12999 11362 13000 11241
856 1051 4134 1031 1138 1187 11556 1409 1971 1604 5209 1620 4882 1406 4390 4168 1048 1202 1203 5218 2139 3269 6381 7121 3065 3077 4613 3725 1109 9155 661 1128 2227
857 666 5658 703 5054 5499 7953 3282 3493 4330 13001 700 3569 2835 5488 5186 826 4927 710 80 3555 5350
858 8 11 3584 649 827 1716 1002 769 685 1003 774 4301 13002 2724 2014 2819 762
859 80 4590 655 3356 6144 6202 5383 7233 7057 665 15 1541 2801 7833 685 13003
860 3290 2765 11 8 1015 2787 3483 3045 15 704 4711 1941 1685 2729 13004 1004 649
861 6295 10071 2737 10862 3585 657 1853 1531 1534 4150 3467 0 7875 669 5906 4312 2792 649 77 3167 3426 92 1718 2756 731 3488 710 1717 1005 1719 3498 826 8576 9121 2754 9929 13005 828 8461 8465 10032 1675 13006 4292 1045 1090 4323
862 2972 1117 5626 4338 7274 7697 6081 13007 1115 3139 13008 780 1090 1145 12273 9469 11740 1109 11549 3828 4613 1868 1892 5610 10859 5204 4608 3455 1046 1089 1051 5223 4606 7177 4443 1317 1595 5191 1559 1073 659 6232 4486 1224 4653 888 6214 3050 4188
863 1598 1654 1327 1378 4179 1409 4343 904 1109 1518 3456 1112 1056 5516 1034 4441
864 1005 13009 3307 2643 1718 2851 13010 768 641 3096 1782 973 2796 821 3247 7833
865 1529 783 11 1548 6652 715 821 652 1540 11648 649 769 2748 657 1549 12 2874 4862 2734 2014 1684 737 9058 13011 1010 13012 2902 9621 2742 7130 82 12017 13013 13014 8649 852 3284 3309 842 9574 9567 8634 13015 2706 3627 13016 10496 6278 648 3647 3245 2737 3312 7261 3651 4900 4301 7443 4079 13017 8668 9501 11895 3259 6044 13018 7428 811 10452 13019 4502 13020 11120 3584 12859 13021 13022 2963 1018 11652 2800 4332 8693 6941 9564 9890 13023 13024 11636 8626 2796 13025 13026 796 650 1860 13027 3684 13028 12330 13029 5339 3300 11123 2886 2858 5340 3600 3686 3603 13030 9586 13031 13032 13033 2731 13034 13035 3787 2801 1533 13036 5325 13037 8329 9988 5913 13038 10395 13039 11290 13040 3574 8412 3479 13041
866 6720 11286 5383 13042 842 4501 3317 11378 13043 4797 5276 2860 13044 9622 5229 5680 804 13045 773 5147 15 2706 13046 795 13047 7816 12766 7 4114 2680 13048 3314 11406 13049 8690 13050
867 1143 1402 4395 9208 1109 3742 1111 6239 4207 2916 904 1439 1114 1104 1145 1648 4177 2684 1060 6213 1033 1323 1645 4120 4114 4875 2025 4227 1713 1393 4217 3288 3726 4138 1649 4145 1247 6170 4463 1482 1440 6245 1396 5097 1176 5606 1125 1224 1662 5471 4270 13051 1134 4364 2199 2222 3740 2037 2910
868 3525 708 10801 7890 4580 3056 4078 4865 8276 842 9234 852 9219 3548 3491 4859 5906 4380 737 2897 2744 13052 1002 5280 3513 844 6134 786
869 5202 2141 1086 7191 2082 4257 7038 13053 1209 5540 4073 1091 13054 5616 12576 1058 11562 1243 2021 9650 1072 1049 1924 4526 1607 7485 6232 7415 1061 1651 9316 4076 5537 4205 1059 2124 1203 1614 1324 4217 12387 3740 1486 2160 1084 9092 1233 5563 1380 4415 1190 13055 2246 11279 13056 13057 925 1045 9020 1216 1976 1133 11564 1105 1124 4255 5524 13058 5468 5469 7751 5548 4467 9720 6246 6175 2391 13059 13060 13061 659 1109 8216 9664 8921 8248 13062 2025 1412 13063 8268 2252 13064 2410 4476 8359 1448 8923 2682 5535 4193 5640 13065 7937 1201 2093 7070 918 1426 7699 1327 7067 1130 4369 1197 4327 1552 5486 1078 1661 4180 10654 5095 1121 1650 9725 1240 3702 13066 1207 3749 6241 4867 8241 9324 10091 2632 12844 6181 9665 781 3371 5465 6167 2584 3217 2702 1189 1967 4157 1569 5578 6841 13067 8261 6688 2050 12313 2782 2774 69 3422 2019 8215 13068 13069 1981 4270 5619 5516 9739 7040 1030 8271 5471 4178 1488 5083 11023 1115 13070 1188 11477 5362 9727 1141 6794 4531 2542 6237 1979 4887 4465 9743 4892 4187 2222 2603 6391 8565 2043 6939 1840 1246 1070 4168 1193 2227 8959 13071 1990 9778 6971 9098 13072 8272 6222 7465 13073 4431 2704 4411 1478 8275 1918 11618 2126 8946 1256 1036 13074 13075 1257 2699 5110 4527 7909 1633 6997 1646 1818 2134 1062 1069 11956 6998 4323 11532 1816 5487 780 2006 4388 11560 3379 1597 2385 7759 9789 13076 3425 7211 11624 1904 7002 1386 1038 6306 13077 13078 6942 13079 13080 8200 1245 2362 2081 12400 13081 2414 1044 1142 12040 9652 1087 11486 4034 2178 11950
870 1053 1031 4103 1043 1176 6975 1143 918 929 2206 1892 1189 1121 7485 1187 5594 4539 4168 1785 1596 11575 13082 13083 13084 3352 3355 13085 1590 13086 13087 13088 13089 1471 10900 13090 8858 6492 13091 7489 1035 2630 13092 1104 2309 13093 4030 13094 13095 5480 1896 3294 2440 13096 10969 1854 13097 8763 1045 2231 2417 11101 8959 2566 2248 13098
871 172 173 29 13099 13100 60 13101 9520 12433 12447 13102 12527 13103 313 13104 13105 13106 347 181 13107 13108 13109
872 1073 1245 4144 4868 4172 4072 1109 1384 4879 10562 904 13110 4395 1031 907 1033
873 907 9696 11753 1098 903 6636 2685 9464 13111 1109 7937 4453 9835 4029 1091 10715 1057 8191 1623 1240 10591 1157 3362 8204 13112 2380 1135 1111 1042 1046 9730 2677 6663 13113 13114 9745 771 5237 1968 1322 1136 1059 9358 9095 1333 2199 13115 1040 13116 11607 6974 2066 13117 11604 11680 1090 12927 9762 1635 5568 10645 13118 1034 8793 5473 13119 899 1380 1172 11477 1948 9785 660 7105 8810 2469 2393 9695 4398 1486 1084 8770 1970 7917 2139 4485 9057 7925 7182 12335 898 1043 13120 7019 13121 13122 2422 1161 6436 1119 10133 3455 13123 13066 2196 1651 1071 1956 1572 10789 13124 10055 13125 1828 2596 1606 13126 7793 13127 1640 1253 13128 4603 1317 9727 1971 11504 1196 1526 3710 12855 3719 8366 4205 13129 11498 13130 13131 8536 13132 13133 2445 1799 13134 7914 6487 13135 1404 7919 13136 900 11351 9831 6492 930 10622 2108 4030 13137 9757 4191 2219 1103 1472 9838 11679 11883 13138
874 1798 4443 2160 2658 1894 88 1709 1601 1434 2718 688 786 1000 13139 1003 713
875 2663 3372 10769 13140 5816 927 1616 8142 1060 9319 1220 8257 1053 5465 2199 5640 11 4322 2372 12368 8891 3217 10787 10788 929 1102 10561 1904 10790 760 1632 10637 10250 1114 7407 13141 13142 13143
876 7927 3837 6629 11164 8568 3206 13144 1782 13145 5406 1792 632 3096 13146 11793 11779
877 1553 5731 1105 1065 5574 2380 8179 10933 5207 4523 6170 5762 1954 1687 4872 5451 5595 13147
878 13148 3329 954 1723 640 1764 1753 1728 1741 13149 5408 1782 13150 1345 13151 5411 12797 8890 12724 11781 7681 8889 12738 8447 5448 3123 13152 7685 632 11296 11772 11931 5433 13153 13154 13155 10518 13156 5432 626 7674 3119 13157 11926 1350 13158 13159 12726
879 6112 4149 11333 2303 13160 1706 13161 12003 5452 13162 13163 13164 13165 13166 13167 13168 12519 8945 1426 8486 13169 13170 13171 13172 9533 12133 8948 1553 1874 2110 13173 13174 11237 8467 11243 11236 4641 5524 5744 9535 13175 11238 12749 13176 11235 13177 13178 2160 5453 7277 13179 1876 6695 2141 1958 13180 2959 7231 12869 4078 6717 7281 13181 4330 709 2154 1532 6383 1943 6099 12369 9629 11242 1031 13182 9422 11256 11876 8478 13183 13184 7254 13185 3346 1887 12573 12384 8484 13186 3294 2916 8 762 90
880 5190 3266 1065 3338 4178 5763 1538 2782 81 4310 7978 2012 4860 10050 674 701 5357 2902 10913 10890 3593 2897 2835 3647 3667 860 855 3678
881 662 13187 8 706 8171 2877 788 5333 7360 883 3174 13188 3546 4285 816 1540 2637 817 1003 1532 11 2638 1718 771 2643 13189 1536 3356 69 6856 3495 2904 1541 13190 3496
882 3096 13191 13192 13193 13194 13195 13196 13197 13198 13199 13200 13201 13202 13203 13204 13205 13206
883 2916 4868 1114 1203 1130 1556 3261 1242 13207 2037 1820 1068 5477 7117 2974 8959 1253 10659 8224 1509 2050 7822 4878 8954 13208 8845 1802
884 12268 6459 1078 2134 13209 9418 6484 9417 1057 891 8991 4608 13210 12265 6453 10358 6447 7805 4390 6569 1258 13211 1067 1588 6469 888 13212 4392 6440 6491 11745 1084 13213 3821 4867 3345 9025 9734 8954 12512 13214 11487 13215 8255 13216 6498 3825 6524 1841 11494 4373 11489
885 2972 1602 3827 13217 1804 13218 4638 1621 3478 9387 903 13219 5809 9469 2617 10623 4121 11565 13220 3339 10944 11009 4398 1117 3740 4392 1628 5140 5126 4734 10673 13221 10 4337 6434 4526 13222 4619 9229 4402 1109 13223 1440 1615 5758 6194 10945 6613 1072 919 13224 10677 13225 5830 6401 5204 13226 4645 13227 10621 4205 6247 6097 1077 1611 761 13228 5538 1597 6193 13120 1101 1093 4354 1455 4227 1149 8142 1540 2973 1604 9660 4194 2911 4376 7207 13229 13230 13231 2082 13232 11979 13233 4180 10030 11907 13234 1156 11601 1158
886 5497 6834 8533 9176 5054 13235 13236 11047 6805 767 13237 7958 3516 2835 5276 9156 13238 7610 13239 11811 5685 11245 6865 13240 13241 2640 5374 13242 13243 6729 6781 13244 6960 88 13245 13246 13247 13248 7642 9214 13249 3421 9573 1017 7952 13250 13251 857
887 11561 4103 5606 4871 13252 4180 7777 4409 13253 1439 1382 5541 12581 4189 4361 10352 1412 13254
888 4608 9322 2052 6985 2445 10861 13255 8223 4051 2 934 2632 898 4441 5137 5008 7824 1574 12152
889 1828 2764 1004 773 5020 3695 3799 13256 13257 4956 13258 9135 9569 13259 10456 6659 12988
890 13260 807 12211 1413 4390 13261 4389 1537 2765 2786 2965 6241 4893 5258 4590 82 11650 9545 688
891 3649 4940 10236 7439 9254 11070 2015 5279 13262 6048 13263 2883 6722 2959 4498 5063 13264 3692 13265 6062 8318 2963 6272 9557 3771 4078 13266 10823 10240 3759 8642 6256 4083 8934 7639 13267 11814 13268 8603 13269 3777 4791 7722 9558 3644 7244 5068 12937 5040 12769 13270 6729 3494 2170 2896 783 4800 7138 5709 3788 9173 13271 5235 13272 5050 13273 5176 13274 10464 11052 11055 5342 7815 3791 2853 8696 4505 8503 9244 10441 13275 13276 10241 13277 6059 13278 4939 13279 9278 13280 13281 13282 11226 9267 6123
892 2785 2967 1000 5504 827 824 13283 676 4585 683 743 2635 2877 5156 688 3495 10117 69 2714 786 674 675 6948 81 999 710 5905 13010 1002 2014 11
893 1134 1056 4128 5238 1073 1054 4415 4190 1187 1055 4180 2125 4172 1164 4339 1057 6174 1518 1111 1983 803 5362
894 4301 1707 13284 13285 883 0 674 4501 3423 2766 657 1711 7742 4586 76 5351 779 9018 7038 6841 1072 4882 893 6587 1026 2968 2724 649
895 929 1429 4405 10249 7273 1112 4169 4548 1406 13286 13287 2090 13288 13289 12278 6213 1478 13290 10322 7992 3747 1174 10659 13291 13292 8377 4120 927 8074 10251 1380 1176 1647 1182 10642 4141 1322 11329 13293 2972 1377 1111 909 8034 6174 1091 799 1378 4158 6636 13294 1721 10647 5809 10059 1659 4424 1415 11576 13295 13296 6182 923 4401 2106 2028 10691 13297 2559 1455 7199 13298 5477 1097 13299 1983 1260 13300 1084 5762 12128 13301 13302 7786 6180 13067 9316 13303 7827 2196 3295 5580 6403 6465 13304 8376 13305 2058 13306 9822 2684 1855 10869 1257 7507 1640 2125 13307 11586 3839 9809 1893 1837 6490 9019 13308 13309 13310 13311 6204 13312 13313 1259 1423 13314 13315 13316 13317 5760 13318 13319
896 1551 4111 7547 15 2755 1718 5906 1539 0 786 13320 69 1532 82 673 3489 2926 649 981 2866 93 4497 709 2012 697 81 7422 8 774 4503 813 87 10388 743 2812 2638 2904 6254 7113 4711 688 3492 8634 8018 13321 3760
897 6313 13322 3167 5906 8090 2660 821 1718 3430 2737 13323 11340 13324 13325 13326 13327 1306 10170 13328 13329 6335 13330 13331 6343 13332 10722 13333 5030 11189 13334 12293 13335 13336 8522 3433 13337 13338 11219 13339 8159 13340 13341 13342 13343 13344 13345 624 13346 13347 13348 13349 11194 5029 3289 13350 13351 9873 8109 13352 6351 13353 8517 754 13354 13355 13356 13357 13358 13359 13360 11182 13361 5902 6303 13362 13363 13364 13365 13366 13367 13368 13369 6348
898 1138 6215 1066 3726 1644 2236 10329 10775 2972 1439 11913 13370 4619 2916 1057 1111 1392 6092 1235 8195 4641 4394 6553 4179
899 2707 3045 807 2874 1781 10547 11755 13371 2756 2637 774 13372 8433 2939 9013 13373
900 7784 8223 13374 2877 8 4586 7210 698 82 93 4164 826 3495 3638 75 4101 2812 5350 843 88 7573 6580 1109 13375 7096 4348 10775 11741 13376 5628 13377 13378 12272 4350 1324 6549 11881 13379 4189 5571 4877 4373 13380 13381 13209 715 6057 786 2748 1540 649 2744 648 769 3563 685 6198 669 13382 13383 1504 3828 6529 12502 13384 13385
901 5504 1539 11 827 999 5870 955 1355 682 1853 4164 1541 2877 666 2797 2902 2012 13386
902 4459 1797 1817 1872 1713 2320 1580 13387 13388 7991 3738 8263 7191 13389 1127 1155 10054 6381 1141 1441 8205 1373 1073 1163 4213 1031 10248 1243 5548
903 1539 11 826 1031 1785 1711 2820 11039 652 2928 1628 12787 3352 13390 8509 13391 7270
904 1053 1030 69 2775 81 11 1709 676 6386 1122 821 2742 710 981 3167 1682 2497 1049 1711 8675 2179 10802 2162 2892 1540 649 3244
905 958 651 5430 625 8441 13392 5404 1293 8439 9403 3099 7666 5450 633 954 957 1286 6304 7686 1355 10165 1741 1294 12733 13393 13394 1283 5425 7684 1280 7733 1279 1722 13395 13396 1297 640 5429 11270 11776 13397 12731 3330 13398 10547 13399 13400 11888 7670 8497 1786
906 1143 1065 4465 5091 4335 4343 4213 1380 2134 9665 1114 4072 4032 2609 4347 5363 5362 4404 2255 1327 9018 661 1558 7821 10626 13401 1426 10789 13402 928 13403
907 11524 1385 4388 1384 6097 1240 1245 5833 10871 7187 2915 1322 1175 1476 12581 11479 10258 10659 1449 12494 1472 1406 1071 8935 1474 13404 2974 7450 1249 4144 4183 12704 1129 4102 907 8483 13405 13406 4343 1465 11087 1248 10627 10031 13407 928 3739 10951 7493 13408 1482 13409 1111
908 654 827 1716 3538 1004 1003 1540 16 4311 87 2820 4996 1016 785 12 10052 2786 11649 2761 3480
909 13 2147 1030 1460 7199 2096 916 1459 4513 1111 786 8148 2012 3489 6651 700 3569 1933 738 722 4935 92 710 2878 2733 2889 2826 5504 2842 7583 3763 3651 2744 743
910 769 8 669 77 2800 2794 92 737 1528 676 1445 1004 6773 96 2782 2788 2902 665 827 15 657 11403 3651 5913 2706 1084 13410 1078
911 8 2820 999 827 77 12258 764 2179 813 2718 714 4996 2638 2014 762 2784 824
912 4 2684 1056 8946 10327 1116 1641 1803 1251 5757 1195 3272 1154 1054 3287 5191 1429 1105 8236 1640 1152 1149 4444 1109 1044 1074 13069 2568 911 1798 1066 13411 10633 930 922 4877 9471 1239 10933 11830 13412 1057 4321 1053 9833 1646 1556 13413 5788 4555 13414 13415 2452 13416 1471 2327 1980 13417 2608
913 6607 1176 6605 904 2684 6207 1438 1646 4548 4359 2559 1834 6190 1388 6211 4528 3333 4707 4405 4268 1393 5833 1378 3705
914 6628 2720 1549 2725 13418 2012 5350 4332 657 5012 2927 3647 762 1534 2791 2781 656 4500 12132 2014 852 8613 2830 3683 3305 3678 2786 7130 5492 3259 3426 783 5361 2023 7428 9203 3512 1540
915 3515 696 6708 4900 4911 715 662 693 690 7819 3483 842 852 2826 710 1548
916 4150 558 3467 985 1680 586 838 576 569 3469 1668 618 12110 616 10015 1311 840 13419 7660 554 13420 4845 577 9928 1666 13421 839 4843
917 5626 2609 5777 1184 4408 5610 13422 4357 4072 1713 1243 4141 1104 4481 4138 4205
918 711 652 2713 1546 2785 709 6252 821 2736 695 1683 2798 69 0 6159 1711 768 3538
919 570 597 553 616 586 613 4671 986 10028 610 598 7318 554 4689 12100 8061 834 992
920 4590 5885 1718 8517 13423 3206 6287 13337 13424 6351 624 13425 13426 13427 12820 8703
921 649 850 8339 4241 1530 665 5692 764 769 786 1716 1550 2965 1853 5187 3349 2748 2814 3760 821 2012 2813 3525 3483 4284 87 2874 783 2897 2718 8409 648 811 6718 773
922 1391 4114 1152 799 5538 1176 1971 1104 2911 1645 4348 1247 5134 1818 4515 9229 7925 1103 781 2206 3459 1566 4227 1393 2973 4472 661 9093 4250 1092 3742 4399 13428 1431 6165 3425 1567 5838 1327 6184 9627 1646 5 2970 1568 1430 1400 1518 1146 1321 1253 1837 11279 4422 1138 1638 5542 1330 1057 1189 9614 2179 1130 7389 2292 7450 7302 8713 10941 4882 1040 1455 1240 1043 898 1126 5203 1396 13429 1485 4121 4484 7119 6236 2252 1090 4338 1149 12298 13430 10591 9020 6239
923 762 4492 13431 2851 5002 3603 4910 7828 91 4796 2020 771 5001 8595 2638 2726 7260 8284 2770 6952 13432 13433 3928 13434 4780 13435 13436 10223 6918 3684 8303 1015 2823 2859 88 2831 1708 6960 3647 3638 787 4301 10377 2800 6057 12943 783 8614 13437 11439 13438 2804 6046 11073 10395 11732 11067 8406 13439 12327 13440 5666 4940 3571 773 7235 13441 4501 5182 5319 7653 3259 5340 13442 6038 3788 10569 13443 8688 6765 3490 13444 12017 9561 796 5023 10433 13445 10442 7239 12826 13446 5322 3300 9574 9202 10447 9989 13447 8683
924 2775 1006 2738 1000 11 1003 1716 69 2874 657 2897 4990 4863 81 3567 4705 2014 4164 6624 715 2637 6275 774 2017 1626 710 771 12 2749 2758 2794 2747 762 649 4991 2902 1004 743 2801 8626 1540 3426 703
925 1828 1442 1105 2663 1043 1044 1110 1133 3287 1065 1086 7415 8219 1661 4338 4122 6682 1142 1737 9725 5609 2683 9016 9052 1761 13448 893 9710 2684 13449 2093 6553 1046 2222 6574 1647 1377 7251 7908 9663 6185 1429 1245 6922 13450 9781 13063 8560 2702 11860 13451 12494 899 13452 2687 7024 11846 3167 1826 981 2820 1682 2043 1034 13453 7469 6942 1579 7937 1835 7460 1049 1053 2189 1643 13454 4073 13455 8357 4631 4126 7001 4102 8207 1210 3706 13456 9761 11681 659 8378 1250 2466 1822 12300 904 8241 13457 13458 6582 13076 1195 7112 7 1418 1068 13459 7031 12714 3261 1987 12053 7105 6170 5547 5461 2199 9775 4467 1321 13460 1084 3839 11914 12387 13461 5593 9711 7165 649 13462 3423 2012 0 4589 2022 4497 4330 2755 1532 6109 5540 2910 1630 1970 2141 1605 2036 2501 2236 4266 2143 11624 1255 1066 6382 300 28 11618 11753 8245 4178 1067 7918 3048 13463 8267 13079 9746 6694 2025 13464 1247 3230 4256 1924 7754 4172 1089 1979 1614 4209 9789 12397 2593 1588 1141 13078 1927 1996 3217 1829 7126 9791 786 1476 8492 3121 6687 1051 13465 1108 1152 10790 1114 1202 13466 4486 2225 1556 7084 661 9613 1176 2021 1635 13467 2584 13468 10787 10356 13469 2103 7463 6569 802 13470 1506 4144 10134 4384 7036 3708 1128 5473 924 3275 1031 2685 3348 1624 660 1515 7485 8921 2699 5468 7182 11503 4882 5484 4630 8352 10685 2028 13471 11532 1378 1036 5517 7038 1422 4160 2196 1244 10133 9668 1138 1646 13472 2422 1077 13473 2072 4200 13474 7549 13475 1426 8740 5485 1478 13476 5096 1062 1715 9727 6955 10789 2219 10056 5538 4015 11583 6841 2686 929 4217 3495 3486 8037 785 710 663 13477 12930 1038 6244 7942 4038 9833 2171 8369 10934 1482 6115 1509 1219 13131 9098 13478 8361 7786 13479 1221 2581 13480 6174 1102 13481 2163 4892 1513 13482 7151 8781 12383 8250 11596 5592 1904 7042 4488 2050 4473 13483 4259 13484 13485 8385 1621 13486 2064 2567 13 1090 1373 2248 9768 1056 7765 6237 1257 7571 1918 6183 9018 4220
926 3045 5504 696 3572 3065 2904 10398 12766 4235 1709 6941 5373 10651 3413 4544 4209 4601 1133 8214 1089 8810 9700 6693 1101 1446 11716 760 7828 2897 800 1852 75 981 6950 2893 3573 3507 821 5278 9151 7338 1853 765 3317 13487 2877 3683 845 3313 4979 2823 3356 2785 9251 10271 1813 12854
927 722 1549 801 16 1547 1853 654 1716 4862 4496 404 13488 13489 9926 4591 406
928 7949 3755 2832 3573 3063 3504 783 5346 3323 659 4 13490 11956 8194 1211 13491 5092 6572 6575 1329 13492 3703
929 11 81 3045 5870 1549 827 654 649 12 769 6671 4860 5504 2830 2784 2787
930 3285 4024 1057 1170 5191 1622 1098 2677 9860 4 6698 3271 1596 7487 4834 157
931 1540 5854 2737 8020 2814 2760 1001 769 2754 762 2968 3535 673 82 731 10847 783 4311 4861 1541 11036 4018 4270 8257 11336 7805
932 3567 2785 4910 3423 79 2020 703 737 8622 13493 13494 4007 2927 2017 3539 6320 3491 7726
933 13495 4236 654 1005 5507 13496 9090 2735 1539 674 88 5188 1547 2184 2816 11971 5669 13497 8898 11703 13498 12852 13499 85 12615 3541 13500 8587 12640 13501 10817 13502 1627 3591 9364 8628 13503 696 860 4980 6827 10868 5792 13504 13505 3429 9546 6892 8336 4161 96 3259 13506 13507 13508 3793 13509 13510 6709 13511 11044 8695 8924 13512 3601 13513 8951 11804 12543 13514 3527 12629 7408 13515 10383 4929
934 2817 714 1628 1629 13516 12785 9637 13517 13518 13519 13520 5876 710 771 3490 13521 13522 13523 13524 9633 13525 13526 13527 13528 8088 13529 13530 4777 13531 13425 13532 13533 4557 13534
935 3503 3594 13535 12538 2883 6733 11 13536 4791 8302 3417 5050 6855 3763 13537 6789 12597 2179 13538 6032 13539 6037 4796 2895 9103 3619 2777 2937 8628 6870 8314 13540 13541 13542 5000 8634 6898 13543 7816 12166 10394 13544 7595 7953 13545 8705 3284 13546 13547 4927 6819 13548 6053 9140 9138 8403 3317 2769 13274 1001 10407 2731 10409 13549 13550 13500 8984 9172 13551 13552 13553 13554 9498 3563 2803 2706 9146 8417 3632 13555 8968 15 13556 2804 2897 13557 785 7653 8311 4865 7644 3583 13558 5491 8321 4937 13559 13560 3587 12938 3300 13561 8661 13562 9221 13563 13564 3638 13565 10615 13566 8318 6768 11814 2904 8399 10405 13567 10235 6861 3633 2751 783 10826 4936 5150 3063 8419 7982 8435 8415 768 9177 13568 7310 6729 3061 10450 9196 13569 6770 8969 731 2936 9247 12066 13570 13571 13572 2829 13573 7261 6913 13574 13575 13576 13577 3490 13578 10436 10050 13579 13580 13581 9117 9162 13582 13583 13584 6854 11307 5665 6901 13246 9977 6959 13585 13586 3687 13587 13588 13589 6781 6052 8402 13590 3807 13591 11007 13592 13593 13594 6761 13595 13596 13597 6830 6728 13598 13599 11387 7828 13600 6144 13601 9573 13602 13603 13604 9165 5278 13605 13606 13607 9206 4510 5059 4079 13608 9893 13609 12911 821 13610 13611 846 12119 6921 9979 4963 13612 13613 13614 13615 4280 13616 8416
936 1443 8 2720 649 765 11 4164 710 670 2017 3129 1717 7745 1540 3605 3426
937 688 2658 12226 12215 7855 5901 13617 9611 9030 13618 13619 12218 6336 6351 10181 6335 6374 9991 8094 12227 7854 3447 11723 12230 6347 10265 12231 8167 13620 5899 8106 6594 13621 13622 8103 13623
938 1623 3271 1053 1128 1336 13624 1152 1031 1393 1114 4476 4172 1227 1240 7496 13625 3379 1134 1518 1496 1656 4126 4473 7967 7780 1631 1256 11956 10096 13626 1037 13627 8197 3702 13078 4500
939 625 13628 1280 13629 13324 759 3121 13630 2645 6378 0 11 827 81 788 2720 1718 4511 11342 13631 311 13152 13632 13633 6315 3444 7927 2658 5892 6316 13634 6287 13423 12231 13635 624 5899 9036 3213 8517 12814 13617 7841 5886 13636 2652 9991 9041 9037 8566 7928 10264 13637 13638 13639 7849 13640 194 636 8093 13641 5885 6300
940 1946 2617 1072 7342 3138 10889 3083 3544 7743 9850 2191 1426 1922 3174 13642 4007 9642 3179 13643 2232 6972 2714 2722 11036 1003
941 1443 696 5488 4899 4993 7585 857 859 3500 3496 3626 2770 2866 2732 3490 4310 1535 2713 3593 5853 1541 7956 2720 11 3167 4904 13644 10895 80 6781 2638 7440 5665 5660 13645 1533 724 1685 7216 3055 5673 1051 6982 3565 1210 1092 1089 4195 6628 9132 13646 3530 3544 6917 1389 5585 5188 1203 4585 8977 1407 9184 765 81 13647 4492 5354 6268 845 3061 10217 8018 1000 13648 93 7649 13649 9336 868 5870 9503 3591 11708 743 6109 10651 3065 688 786 6253 5510 5844 4280 3083 13650 6763 5875 666 2722 2746 11700 5329 3420 3046 13651 5843 4111 13652 3504 5046 4791 12262 4083 3590 3517 760 13653 2835 5905 817 5234 4991 2825 3502 13654 4643 2812 3574 4241 2710 13655 1540 13656 10051 8171 5876 9712 11575 7019 5535 5477 5001 6148 5148 9271 1005 7307 6861 3645 763 846 5869 13657 685 1043 2014 8856 4259 13658 13659 13660 2726 1682 2640 13242 692 6784 6960 1534 9151 13661 8553 1015 783 2731 3186 862 6320 9638 4781 7892 6033 1778 8497 10515 3624 1370 5801 7226 6036 6049 13662 6912 2787 6753 2928 8284 10863 13663 13664 4303 13665 1992 2894 8636 8955 7949 10377 1510 8611 3077 0 6882 3678 5244 9556 5018 3317 15 5271 9221 8342 11391 4865 8634 4081 3603 6739 13666 4498 1539 903 2811 8763 13667 5195 13668 8965 13669 13438 7544 13670 13671 8982 5351 700 2837 1018 665 8038 3313 2898 3424 5158 9704 1442 13672 7828 8390 1001 2895 13673 1718 11808 8036 11649 721 10918 9159 2784 1538 8617 13674 13675 13676 6043 13677 13678 4800 2788 693 13679 6837 2869 75 3633 8403 8311 1002 9981 6016 2748 9138 13680 6786 3148 13681 9154 769 13682 11401 7279 13565 800 13555 2813 13683 12638 13684 8301 8633 3311 3085 13685 8291 1548 13686 8659 3691 7591 8305 6751 798 10617 3322 7644 6063 11382 13687 11111 5497 13688 6919 13689 6749 898 13690 13691 13692 13121 5380 13693 13694 6631 3259 13321 3245 766 7210 4936 9366 7130 8080 9253 8432 88 4803 3518 4098 6044 13695 1021 13696 1711 8652 7605 788 13697 8148 3684 3069 8329 3790 13698 3918 874 1010 4557 9153 13699 4948 11288 4900 13700 13 10945 2328 8078 8875 10096 10595 2678 697 13701 10734 13013 13702 13703 8767 13704 13705 13706 6143 13707 13708 13709 13710 668 1542 10107 3309 3651 8750 7833 9574 1035 796
942 1145 1109 4160 5548 7459 2154 4193 1373 1051 4199 1569 6091 5778 1737 5219 2974 1150 10740 3265 799 11291 4396 1804 1055 918 1077 5809 4197 13711 3338 1378 1048 6163 8176 779 6614 4470 2584 5084 1138 4128 1124 9628 5133 1230 9523 4143 1420 4530 4482 5538 5120 2131 4144 1868 1455 1601 1823 6685 4354 4880 11308 1439 3839 2139 12409 1459 5524 10972 5122 5817 1663 1251 3832 1056 1141 4881 803 1598 1176 2037 1033 2259 4339 10102 4443 7 1837 1588 5136 1321 927 1320 1250 7780 1438 7566 4327 1322 1121 1045 1114 1424 4613 1244 7202 5518 1335 1053 13712 8224 7889 4174 4347 5599 1044 6241 1128 8184 3373 1330 1404 2199 4218 1512 1252 1470 11010 13713 13714 13715 13716 4450 11023 11846 13717 4441 1245 12112 1331 1158 4464 1471 4074 1480 4267 6999 1713 2297 5362 4488 8955 6576 1060 13061 3267 11822 1824 13718 1498 1509 6204 10691 5134 4426 1415 13719 5081 1656 1483 4408 13720 2084 1327 13721 1486 1386 4186 1104 13722 10787 2916 2911 9440 3826 12383 13723 6966 4297 1575 2559 1329 1102 8189 9358 4407 13724 11918 11596 2212 9774 890 4415 9775 13725 8272 8963 6308 7493 1948 8274 4028 4388 13726 13727 4429 4486 3379 1080 13728 4217 1929 12337 1136 9061 7944 10683 13729 13730 928 1095 13731 6634 4630 13732 13733 2226 5808 13734 2705 1624 9751 1513 1916 4567 1240 1211 1478 1134 929 904 10591 1037 10949 9818 6702 924 6942 6433 13735 2195 11505 1257 2164 10642 1427 4359 1476 13736 8270 13737 1261 4364 2240 11979 5099 1419 10643 1840 1132 4334 1318 13738 7822 1422 13739 826 13740 7994 1085 1917 13741 5536 13742 7490 13743 13744 9838 13055 8376 11498 7631 13745 4200 5517 7509 1031 4343 1458 10645 13746 11739 13747 5209 13748 11499 13308 11503 1905 659 6431 3137 11531 1264 13749 11501 6609 13750 2686 12878 9210 11962 12855 4122 2915 6220 10678 8733 1457 13751 13752 6442 13753 13754 13094 2365 13755 1143 13756 13757 3454 7510 1249 13758 6465 13759 13760 12145 1259 13761 13762 9796 2604 13763 13764 7995 7792 7564
943 13765 1030 1566 8991 4463 4608 649 2147 5125 13766 13214 6560 9010 10358 6419 4204 1111 5571 6972 12494 6084 8999 13767 8255 2232 12270 4551 6414 13768 9386 6453 6204 2973 10356 2380 1117
944 3391 8121 5260 3407 5184 1 2 938 3410 932 4052 11369 944 3397 3392 3409 8122 7269 4046 3402 7266 3406 8120
945 816 3480 657 688 2908 654 1684 9 2737 5370 8171 698 2892 694 10832 2017 2756 4859 771 3133 2815 2787 2763 12 1019 2733 2637 11 710 2821 2742 2818 10052 2806 1025 3605 2964 1034 9788 7121 11583 2819 10998
946 2708 13769 1004 7310 8532 3807 2869 4492 3637 3083 2965 3594 1444 3064 4233 3591 3678 11068 2902 2863 6048 9110 13770 12685 13771 9557 8659 4500 3323 7435 8412 2725 6198 13772 13773 3317 3321 9574 3085 12119 10395 13774 8503 5181 4508 13775 1546
947 4183 4560 2376 4871 2125 2603 10587 1430 1056 1322 1440 1617 1817 1457 6185 7785 4144 5755 3133 3427 2851 4343 6982 6204 12121 4464 3057 1109 1244 1330 799 904 1114 1145 1335 8208 1487 12929 4388 1077 7580 1257 5536 8205 1073 2077 10634 8074 4158 13734 13776 13288 13777 13778 13779 13058 8772 1478 1656 1057 10664 9311 1104 1522 1527 6575 10668 13780 13781 1324
948 2794 1533 13001 11920 13782 5681 4791 2909 762 9271 2715 9237 3604 5012 2939 3540 13783 13784 4956 13785 10829 13786 7818 2766 3253 826 10485 10806 12608 7435 13787 13788 13789 13790 13791 3251 13792 12627 13793
949 7468 2663 13794 4385 2162 2664 2245 13795 1969 1393 4554 3366 2026 5099 1048 13165 4200 6262 3376 1155 10972 11877 5743 5209 2160 1924 1065 1072 5807 9324 3832 7277
950 3218 1196 2614 10767 4157 1972 5769 2110 1395 8742 4298 4421 12032 13796 2162 3346 2044 2334 2502 11274 5779 11876 7562 1843 5772 3343 5778 2491 1638 1231 5787 7968 3336 7698 2666 5810 11903 1639 1045 5790 1995 5807 1558 1840 4544 2071 2206 1891 2077 8909 1785 5101 5452 8879 2192 3456 2163 1910 8947 6246 1922 2191 7977 2051 2357 1810 3265 1946 8197 5757 2917 7389 11310 1663 7302 2255 13797 7750 7398 5453 8923 2136 1050 11853 3367 5084 1077 6666 1958 6676 4872 1805 10972 8719 13798 1953 5603 904 1155 4108 8960 5265 10873 1467 8475 1438 5209 1797 2484 5753 1848 2259 2596 3333 9092 9383 5825 9756 1518 10979 1104 2052 2584 1981 9855 13799 10738 1245 7479 13800 12388 3295 1932 13147 2274 6547 13000 4435 1111 10648 4200 918 2099 13801 2969 4402 1814 1980 3702 1879 4158 1857 5824 2008 2388 1827 1520 13802 7199 5100 1129 4197 3223 5731 7463 3299 1985 13803 13804 13805 1656 3216 10091 8187 4203 1243 1600 6163 2337 1799 2048 2214 2210 3335 5826 13806 906 4135 930 4527 2111 2916 1048 10631 13807 2047 13808 8759 5099 13721 7284 2310 69 1465 11081 1412 13809 4528 3778 11621 3046 2179 2769 816 783 2725 4590 3129 711 2638 4297 13810 13811 7517 5775 10949 10656 8961 6939 11623 1324 7965 13812 10931 4350 5607 3455 6636 13813 12397 2029 1862 11486 11567 2106 1875 13627 8726 13814 11027 4443 2220 2344 13815 2686 4348 13816 1109 4654 1496 1659 10634 1898 924 13817 12914 1431 13818 929 2011 899 3460 1084 905 13718 6680 2025 13819 13820 4360 8933 1923 13821 7404 9752 13822 12051 7570 13823 10740 4205 2273 1876 12362 13824 1690 4554 1939 1257 12040 4488 5078 13760 8558 13825 12054 1422 1487 11620 3709 3452 6403 3260 13826 2190 1426 1949 2146 5123 2224 10672 2063 1885 2171 7753 4137 13827 7291 13828 7394 4253 3372 13829 10765 13830 6999 1804 2229 12058 7518 13831 2260 2284 13832 13833 13748 2600 11499 2161 1916 10713 13834 13835 13836 13837 13838 8353 3383 13839 6534 13840 2249 2122 1095 13841 1654 13842 1837 1524 5803 10772 2225 13843 13844 13845 13846 13847 3358 11995 4555 2482 5812 12151 13848 4707 11983 9911 4867 2298 13849 13850 13851 2608 13852 2381 1926 13477 1687 13853 13854 1242 5630 13855 13304 12356 12855 13856 7566 2248 11313 13857 12995 12049 13858 13859 8487 1816 5459 2401 2160 13860 13861 5531 5451 4517 13862 9026 2352 13863 13864 2374 1165 2118 6486 6569 6513 2247 1255 13865 2579 7476 13866 2272 1931 5811 2309 13315 13867 12593 2557 2364 2589 13868 1053 5007 2478 1702 11330 13869 13870 7180 1701 13871 5485 1998 13872 8830 12755 13873 13874
951 1541 738 1053 5753 788 2736 76 3483 2742 714 4904 5350 84 2812 73 1707 13320 842 4899
952 13875 4167 4623 10348 4602 1057 4343 13876 3824 2973 4981 1548 1644 13877 6622 4628 4390 8223 7885 1928 1138 8812 4376 1146 4145 4032 10350 5615 1327 1441 1051 10356 1145 4548 1378 1108 5470 7751 1149 4318 1386 1109 4377 799 4515 1104 1112 1073 13878 1111 3752 1322 1376 1663 1785 11825 4144 4613 4138 1518 1385 6614 1253 1152 4454 13879 1258 4198 1126 10362 1460 4141 2189 1174 2227 10857 13880 4180 5108 7486 1240 914 4403 8192 13169 1457 1090 811 1455 4137 904 6601 1330 2056 4564 2686 10859 13881 1377 1430 5781 4443 4481 1984 1156 1321 6429 13882 5839 1875 7796 2330 7579 12697 4207 4129 1249 1176 8181 7822 1250 1102 9062 6185 11018 1048 4126 4268 1478 12029 2231 12304 1384 12498 4173 6565 8221 7494 6575 7558 10258
953 3071 4307 5270 2825 6148 13883 6855 726 1446 7282 4711 13558 1685 3701 6931 4912 12548 3626 13884
954 6982 1031 4209 1088 1030 6221 2134 4882 5577 1769 4113 1121 5809 1186 9317 2681 300 1158 9016 4297 5538 9651 1066 1090 1983 1661 13885 2677 929 1818 13886 1053 13887 11668 11617 9657 1637 2378 13888 1426 3138 7100 5467 2086 9707 7561 13889 5090 5533 1452 13890 9020 3826 13891 10098 2392 10644 9021 7504 13892 7753 5114 8236 6986 9710 3371 2141 2463 11588 7903 9658 1513 4270 7925 9702 1560 7570 11580 13745 1861 7786 1829 6649 2144 13098 7560 7041 1069 1098 13893 5227 1038 2542 3709 7175 9098 13894 2481 803 9711 6606 11849 8987 12754 4220 13895 13896 13897 3416 7471 9746 13480 8365 13898 1193 10937 13899 2505 13477 2260 671 10139 1847 2284 10950 13832 7470 6456 13900 4321 13901 13902 5482 13903 13904 4542 13905 13906 5434 13907 1638
955 860 3649 7981 807 4608 1109 4602 10623 8708 6982 2199 3083 7544 13908 5465 5511 13909 1621
956 648 2179 2785 4911 4657 11430 826 13679 1005 8529 657 4992 1718 82 2023 783 981 662 670 772 2803
957 2820 999 87 2749 1443 2713 11 2772 3280 1716 2818 710 1628 1006 5870 2742
958 8201 4135 5629 7281 10978 7786 3294 9717 1831 1134 7302 9719 1573 1696 7253 5776 4372 1810 13910 1887 1471 2607 2066 2341 4104 1198 8355 2198 8267 1481 12370 1824 2226 2916 1057 1429 1036 5465 1111 1457 10787 929 13722 10951 10094 1439 1038 1141 2109 7025 2523 13892 1515 1250 13303 11960 10132 1242 1979 13911 2196 9822 12717 1084 9832 6492 9818 7509
959 2853 13043 13912 2899 4980 13913 3658 6038 13914 3313 2774 8653 5692 8585 3564 8597 10448 10827 13915 13916 3788 5667 13917 5501 2753 10441 3309 4331 11439 7434 4937 10998 5850 10415 5270 13918 2896 11732 2170 13440
960 8938 5600 7467 1848 3218 6679 1931 2255 11441 5219 7971 12357 7483 1143 1639 2077 1373 5630 8933 5747 13919 3234 1846 5548 7400 7566 1191 4125 5132 1109 3295 2491 3823 6699 1945 13174 10902 7823 2162 7616 12833 5642 2617 10069 10620 11274 1814 7090 4157 5745 2526 8880 2202 2445 12353 13920 1189 13921 3376 1923 13922 8351 2484 4360
961 648 3059 3423 2179 7978 11 2737 2904 4244 10590 2017 13 7155 4385 1994 4120
962 2815 5148 666 786 0 6648 710 7424 8147 73 1074 676 3418 711 868 82 9639 3174 3179 1090 2710 9087 669 674 85 93 3701 87 821 4332 13923
963 764 737 3129 11 2017 75 2720 1718 824 73 6819 1716 1682 84 1628 1709 722 827 731 4288 4582 3244 2722 710 88 3069 6384 1856 4285 657 68 4709 6271 685 5350
964 3345 13178 13 2025 3379 2320 13924 9902 11877 1513 3826 1244 13925 11975 8201 11879 12871 11719 1884 8491 5477 7175 1887 2281 1922 12133 13926 13182 13927 13928 3749 5095 13929 1240 6412 8886 11616 1121 11330 7897 2912 5209 4536 7295 10765 13930 1084 7299 5783 13931 5740 13932 11275 8485 13933 1156 7403 12391 1638 2239 7766 4270 3453 4541 2012 6397 5598 7752 13934 2141 6636 84 7477 93 6687 1253 10845 2379 1927 2171 13935 13936 4415 2627 11999 7353 6436 1804 13937 12357 13938 5734 9459 5816 13939 11631 1066 2082 2224 3343 3236 11253 1426 2147 4667 1810 2032 13940 10767 3294 2334 1191
965 2912 1143 1138 4339 1258 5199 1061 13624 1089 2380 5364 1590 8717 6943 13941 1322 2700 7791 4361 4450 1245 1810 7494
966 3839 9440 1412 6236 8198 2609 4619 7296 1180 8816 6443 4627 10673 12024 6434 11672 1097 13942 1642 4622 13943 11586 1820
967 5804 5131 11291 3710 4544 1117 13944 4409 1387 1045 6685 1598 2141 1145 2163 1046 6386 5204 8731 10740 1474 5084 13945 5081 1450 2036 3451 4454 1148 5825 13946 13947 2338 6204 13948 1838 1130 1109 4377 4443 4396 3832 1561 11849 13949 9736 13711 13950 1452 10973 2491 5099 12351 2509 1645 11827 4386 1971 4158 1134 4123 13801 13951 1482 10739 4384 4204 1393 7791 7199 1030 1828 2443 4548 1385 2466 1441 6232 4125 1604 6106 5123 1661 1593 2497 6666 4450 1239 1068 3217 1214 1102 4137 6187 1055 4126 3267 5633 8194 10972 1242 4217 4531 4221 1428 1641 4520 2045 694 2724 1628 3167 824 1124 13952 1867 1388 1983 1138 2684 4144 4128 1040 7977 8909 4193 1455 1253 1430 1812 1251 2037 1056 13388 2444 2682 4350 1518 9724 1640 1334 4459 4872 3371 9431
968 2826 855 702 7233 852 4928 12832 2854 696 3592 766 8339 7895 8598 4492 2640 2846 4919 13953 6035 3773 12154 3784 7878 9244 3494 13 6060 10347 9159 7709
969 1539 3495 768 2709 1629 1540 2902 3317 13954 5361 685 13048 868 7591 5383 4502 1005
970 13955 9485 13956 7528 835 575 4843 576 991 573 5165 13957 4696 13958 4683 608 619 588 828 1267 831 13959 4695 571 997 4693 4675 841 4857 12256 1677 13960 12092 7529 12964 4674 615 572 7272 560 1274 7532 558 3090 10280
971 2785 818 13961 696 2712 7844 3208 10062 13962 6355 6330 6368 4720 1767 968 974 11296 13963 13964 1772 11771 11778 13965 9616 13966 5432 12795 5408 3119 970 13967 1770 651 629 1366 13968 13969 640 13970 13971 646 4274 7694 7677 3103 632 13972 13973 1355 11776 625 7690 642 13974 8888 3096 1341 5406 1360 1297 3094 13975 638 1724 13976 1748 13977 12797 13978 13979 13980 8443 627 13981 1305 13982 1338 13983 12735 1280 1346 5434 8041 5426 7732 7692 8497 11887 13984 13985 13986 13987 11770 1342 11931 13988 13989 13990 13991 12803 11356 13992 8878 11774 1794 5420 5407 1340 13154 11781 10724 11766 8446 13993 13150 5443 11780 13994 11784 13995 10701 977 13996 5417 13997 1078 1747 10777 13145 13998 13999 14000 10705 3105 14001 11768 5402 14002 1757 14003 11793 5445 14004 1729 14005 14006 1367 11760 14007 11933 745 12815 14008 11926 14009 14010 14011 7730 1745 14012 14013 1796 1343 14014 1368 12804 14015 14016 14017 14018 14019 14020 10542 14021 14022 14023 11342 2686 1983 8784 8271 8252 11641 14024 14025 11752 14026 14027 14028 10703 12824 14029 957 14030 630 14031 14032 11928 14033 14034 14035 7686 14036 6318 7668 14037 1282 7734 5416 7675 14038 14039 12724 14040 7681 13158 14041 14042 5413 14043 14044 8430 1306 14045 14046 3095 11272 2703 11782 14047 14048 1351 14049 14050 14051 14052 1774 13327 5450 955 14053 14054 3330 14055 3100 14056 14057 3126 5403 14058 14059 12569 14060 14061 11786 7761 1372 14062 14063 8506 14064 14065 8504 10985 11789 14066 14067 9618 14068 1736 14069 14070 14071 1787 960 14072 14073 1364 14074 10526 11797 14075 10527 1284 14076 14077 14078 10776 14079 14080 10528 1288 14081 14082 14083 14084 14085 14086 14087 14088 972 14089 7729 11794 14090 14091 5409 5429 14092 641 7755 8501 3112 11640 14093 14094 14095 633 13152 7669 14096 14097 14098 8500 11262 14099 14100 14101 11792 11775 14102 14103 14104 14105 14106 10723 11929 14107 7737 12953 10522 14108 14109 14110 14111 5404 12740 12737 14112 1765 14113 5424 14114 14115 14116 14117 5427 3125 8085 1741 14118 14119 14120 14121 14122 14123 12554 12239 14124 1281 645 14125 14126 5435 14127 11755 10996 14128 14129 14130 14131 14132 1744 14133 14134 1776 14135 14136 5448 10555 14137 10553 8495 1291 11757 11787 3116 6337 14138 12801 14139 10536 14140 14141 12741 14142 1786 14143 3212 14144 14145 1279 14146 14147 14148 14149 7764 14150 14151 14152 5430 14153 14154 14155 14156 14157 14158 11788
972 4164 4246 12684 3596 716 4981 8982 6651 699 710 2867 3661 2864 3629 1937 3493 5357 6753 3684 4910 8555 3628 3781 842 7982 4162 6805 8596 3695 9977 14159 14160 3601 783 3651 5037 729 9244 9117 10221 4915 3634 6901 3525 2868 3680 8597 14161 3590 4494 8171 4086 8628 6819 2869 3655 14162 3630 14163 8600 13650 9205 8342 14164 3817 7344 14165 2846 3568 14166 6203 13908 668 14167 3766 3545 5876 3584 7338 1540 7312 5356 3605 3640 15 8325 14168 2726 3683 2895 1541 10613 6902 14169 773 8408 766 2786 8284 13237 743 3686 10606 3646 2708 2706 852 8283 1935 10479 2826 6044 3305 794 3291 14170 3784 3788 14171 14172 5354 3637 2902 9197 8299 3603 3647 14173 4895 8613 4993 5056 7710 3650 10998 5861 7433 8291 3787 14174 3595 8626 5038 5319 6036 8625 14175 3790 13681 6146 3633 8658 2721 3620 5063 14176 845 10863 8552 10387 9191 9252 11060 3608 3675 6851 14177 8616 14178 14179 4313 3807 652 3802 856 14180 5654 2894 5491 10403 3074 11693 8407 3804 5173 14181 1018 8654 7595 8627 14182 14183 3312 6258 2841 11733 6046 14184 14185 3687 9552 14186 8143 6707 5656 2873 10928 5680 14187 8637 6055 8660 8404 8317 7307 14188 11302 8313 795 5913 6142 7645 14189 12677 2789 14190 8323 8645 11400 11409 4081 2015 10214 4913 7960 7722 3643 3253 8035 796 5023 8661 5234 14191 75 14192 6729 10410 13688 6935 8279 10614 14193 9561 8326 14194 14195 8327 14196 14197 14198 6200 14199 6715 8669 4235 6857 14200 6063 9261 2785 2813 5024 14201 14202 14203 10569 8668 9567 3255 8677 5322 14204 14205 9566 12921 2013 14206 733 8676 14207 3075 14208 8346 9013 5380 14209 14210 14211 8648 14212 14213 14214 14215 8754 14216 9571 13589 14217 3626 3591 14218 5017 4587 14219 6830 14220 13240 14221 14222 14223 9168 735
973 1529 2772 696 770 2718 711 852 2815 2736 2757 82 2753 772 6705 715 2874 652 7829 5069 2760 2747 3045
974 4128 1136 1376 2186 2125 1108 899 3372 1814 7977 1960 4548 14224 2025 1081 7910 4144 1073 1333 6565 1423 2686 1785 9719 4132 9626 14225 1322 14226 1250 1471 5257 14227 7827 3703 1385 4464 14228 9223 3379 13289 2028 13288 1134 1146 1378 1515
975 10974 10967 11081 5790 13928 5785 2320 7187 2111 4372 2193 4523 4120 4219 1378 3422 2517 1803 1382 5110 4630 4454 1471 1432 1440 6207 4433 12409 3333 14229 1640 5465 1386 3142 12000 3268 10054
976 1005 2708 6569 5462 1069 1165 807 772 5204 1595 2470 14230 7010 14231 3338 8782 2127 5753 1160 10317 2756 2734 6409 7910 5228 1820 8959 14232 2108 7070 1560 11664 8778 794 913 14233 10784 5469 4036 1596 9730 1556 8793 7132
977 8566 13617 6204 1438 12568 12846 9993 11128 14234 2645 9045 6366 9030 14235 14236 3355 12220 14237 12565 10002
978 4365 12923 1577 4179 721 2096 1441 4867 4402 1104 12279 4343 904 2914 4036 8208 5364 3730 8919 11329 1138 9870 2274 4270 7121 13951 4602 13801 6193 659 5212 1254 10687 1240 5817 2974 6094 11332 10873 4615 14238 11753 1250 1053 1109 13876 10859 1439 799 8195 1611 4638 1458 4483 10350 10059 4473 1070 1661 1050 781 1057 14239 14240 8950 1253 2932 4183 1145 10591 1156 14241 7115 4880 5221 1089 9656 4443 8228 11278 10787 4267 8205 1948 11277 7389 915 6569 4634 1251 11715 10789 5100 3832 14242 7786 3702 909 4613 929 10092 4399 1111 10623 7567 2701 10890 3495 4996 764 2030 15 868 4636 81 3828 10941 10643 11583 13626 11571 1632 7795 1143 6462 14243 2050 6702 2410 908 2916 7108 1624 6428 8272 1066 14244 11615 11907 4653 1072 5469 1646 14245
979 11891 5409 1301 10705 759 5442 5436 639 14246 11756 641 632 966 5432 1355 14247 3329 7735 14248 1729 1351 7736 1774 14249 13980 3094 625 5418 11779 643 5414 1350 5410 11775 973 12800 14250 13965 975 1302 3101 14251 7670 3096 14252 12731 10984 11772 14253 11776 10531 14254 10341 14055 11771 14255 12727 14256 3093 14257 12798 5406 14258 12823 1750 1366 5416 14259 14260 1771 14261 11926 12738 14262 10985 1794 11769 13991 11927 954 628 12824 14263 11781 14264 5413 14265 12724 7853 13971 14073 10724 1792 7664 10530 3111 1749 2674 14266 14267 1757 1775 14268 12793 3118 1728 10547 14269 14270 13157
980 973 1541 2785 630 7700 2959 821 657 2751 6717 1306 967 637 6297 92 666 2747 786 2757 2179 711 7585 0 14271 3489 678 1718 731 7741 685 88 5156 1683 8019 13984 1774 3126 2925 2763 688 2874 783 4332 2792 2716 3045 3846 11450 3856 14272 11457 3173 3865 877 14273 12786 14274 7369 14275 14276 14277 9611 3194 1782 2673 632 10541 1370 1786 5424 3444 636 14278 3214 3838 13640 664 3433 8566 6287 6332 6301 3436 3837 3836 6316 11128 624 12214 2804 2725 2799 2781 4500 8 771 2815 1826 2803 722 3678 3167 13671 15 79 1529 3918 2618 7035 13 4546 14279 7068 6693 3294 7487 6666 1084 1797 1089 5471 2232 1661 1979 1053 5227 799 8197 1045 1049 13217 5465 14280 3852 14281 6320 14282 14283 7655 4795 3316 14284 14285 2380 6178 9851 14286 1184 2696 12399 14287 13725 1218 1161 14288 1581 5199 4193 11666 1111 1492 1518 1232 1259 7036 6576 9774 7943 7697 1115 5477 12383 14289 14290 14291 5336 14292 9075 9789 14293 14294 7172 14295 4557 3146 1010 9551 13425 6922 14296 8784 1036 1715 7153 14297 1255 1102 2258 1471 5612 1995 7330 14298 2542 9772 5228 14299 11510 13735 1837 10677 2043 14300 4734 14301 2064 11881 14302 14303 9800 14304 2916 1056 13224 5102 1114 14305 3353 14306 4257 5545 11101 7539 12788 13690 9796 14307 14308 13120 3352 7765 5565 9398 4452 14309 9818 6968 7799 14310 7901 7004 2075 12576 6543 6211 649 2141 1426 3726 4536 9326 6970 12714 4288 5242 6549 14311 14312 14313 2103 13930 1240 1948 1478 1256 5569 5172 703 2906 2175 8412 4963 2809 11073 1004 8409 11290 10414 7699 770 4488 1242 2109 1383 1646 8267 5468 6433 14314 8785 929 13288 4473 7128 2523 14315 4588 10077 3069 7828 9088 3052 14194 4342 13384 6471 87 3502 3807 2012 2859 8406 7239 13234 8821 8934 721 14316 14317 7247 10377 3771 11302 2876 760 773 2780 5188 6977 14318 14166 6061 5701 3811 5024 2842 9557 768 5322 10442 9263 1544 4498 14319 4938 9574 3248 8679 9558 3804 6045 8404 8341 2898 3573 693 11070 10394 4933 715 1003 9553 10423 9146 2798 14320 8669 4589 3253 3516 10886 14321 14322 14323 10448 14324 9981 10441 7653 5053 3494 13545 14325 859 14326 2896 8396 8676 6020 805 1551 7392 14327 4275 14328 10449 13555 8673 5400 2891 14329 9250 2791 2939 14330 6905 762 5054 2883 842 9335 14331 2723 6156 13790 7246 5669 8429 6703 2775 14332 14333 11068 14334 14335 10457 10335 6793 10438 7881 8695 12311 2786 14336 8649 13241 81 6813 14337 4504 14338 796 14339 14340 706 16 89 4505 708 3083 8693 14341 1710 5023 5854 14342 14343 8683 13606 14344 3632 1540 7435 14345 4911 14346 3777 10074 14347 8337 14348 2941 2706 8346 14349 7873 737 2853 2903 14350 8433 2902 6708 3061 14351 4313 3063 3245 2772 14352 5022 5062 14353 3078 14354 3277 5489 10614 3754 14355 9176 4314 9157 8753 5853 2730 4860 5683 8434 11065 5361 14356 3300 14357 8294 690 10431 14358 9484 3309 6628 13683 11288 69 7147 14359 6830 9985 12825 9975 2762 14360 14361 9568 3555 10241 11056 7524 6865 6637 6639 4843 7532 1271 567 1269 10039 14362 7529 9567 14363 13016 2949 10497 9578 7815 6131 6272 8326 8345 14364 2735 11924 5380 8752 7313 10468 12168 8665 8318 7138 13588 6030 14365 12017 13043 14366 13586 6741 10459 10439 12015 10466 14367 6770 14368 2886 14369 14370 1546 14371 14372 10697 2769 2638 9266 14373 2741 11069 13515 4976 2801 7722 14374 14375 2942 8344 13579 14376 14377 2835 795 9582 14378 14379 14380 14215 5153 6908 5351 2643 14381 14382 12828 5340 9575 6761 9580 5378 10075 4981 14383 5397 9290 9581 7963 14384 12984 14385 11652 14386 14387 14388 14389 12859 10472 9624 3789 14390 3084 14391 8646 14392 810 9984 7581 12545 13912 8435 14393 5175 6037 2756 7235 14394 7139 4511 14395 668 14396 5356 14397 13018 5394 9550 5177 5063 13599 4281 9244 14398 9586 10465 9577 662 3817 14399 14400 14401 14402 732 13039 2712 1933 7872 11409 13386 14403 14404 846 2800 2839 14405 5496 2865 14406 727 10476 7890 14407 1548 5398 14408 14409 10500 14410 14411 10505 8696 4991 14412 669 13019 9988 14413 14414 7428 4929 3643 5278 14415 14416 710 3312 13038 2873 14417 11955 9822 14418 905 7506 14419 7627 1524 4337 14420 6060 2739 6047 4590 14421 2783 7357 4936 9285 12896 14422 6048 10470 798 677 10491 13028 14423 8635 10496 14424 13277 7702 14425 14426 14427 14428 8427 14429 14430 8596 11892 5328 14431 14432 14433 14434 14435 14436 14437 8428 2833 14438 3628 845 14439 14440 14441 14442 11067 14443 12670 14444 800 14445 14446 11801 1740 14447 14448 14151 14091 7683 14076 5416 7853 14449 14450 3096 14451 11640 14062 14048 633 14065 14073 10724 14452 14453 2860 7545 10753 13025 3072 14454
981 3545 1837 2160 4270 1661 1810 1084 10964 3287 1556 4102 2686 1244 1045 2093 4667 2902 9975 649 1025 15 12 1983 2801 8147 1598 10133 1380
982 949 8122 935 9072 5492 3560 3507 656 2967 2176 3399 11373 4056 4241 6153 4091 4935 4986 7830 2014 8119 10008 8192
983 1504 6074 12128 1104 10349 14455 14456 11958 2172 6484 9417 1800 6249 11662 9070 1114 6409 14457 1037
984 1532 1685 2775 4859 2926 4330 4657 3079 670 10942 2736 11041 3430 87 3356 2962 2761 711 5905 2714 2771 665 3129
985 1064 2134 10 1577 8264 4870 4348 1034 5193 4125 1615 1043 7121 1399 4220 660 4076 9468 5092 14458 780 893 1105
986 1594 1176 14459 1979 1616 9440 799 1330 1098 14460 2686 14461 890 5202 4488 10619 900 1513 12505 2422 7070 2458 14462 903
987 1696 4073 12995 5759 2341 2618 13845 1803 8895 9533 8557 14463 1454 12404 2300 2048 14464 14465 14466 14467 14468 14469 9425
988 4514 4145 4141 1152 1422 1994 1386 1460 1378 1391 1396 11331 6522 11079 9327 14470 7907 14471 4551 2081
989 14472 14473 14474 7931 14475 14476 6727 14477 3660 4271 6141 4237 9365 11066 12607 9584
990 14478 12487 14479 14480 12267 6424 11524 5116 11819 4608 6072 13767 4335 6095 14481 14482 13095 12581 14483 9385 12500
991 4052 947 4053 3406 4048 3392 3401 3389 5259 951 3397 4044 4039 11368 931 3405
992 1084 4018 4621 10355 9860 8191 1172 4020 11676 3425 1595 5214 5564 7787 676 1425 14484 6615
993 3826 4415 11917 1156 894 659 3735 14461 11491 5100 1325 8950 1189 4190 13058 4032
994 2818 7210 763 1001 1530 649 648 1541 3256 1004 3242 771 1709 7233 6628 2740 2820 2751 1003 75 653 12 2759 11 2819
995 10246 5603 4139 1077 7797 5757 4114 2036 10935 10327 1196 1638 1116 1185 1182 11291 1828 1471 1441 2501 2139 1418 7751 2160 2466 918 2030 5101
996 4269 3751 4879 4318 1377 8574 1046 4435 7121 7771 7906 9872 6982 10682 4455 4022 1646 6168 1440 9786 8192 4441 9682 5095
997 769 4981 648 11 3055 736 3281 3490 3600 3593 737 1540 3507 1684 0 3529 1546 813 77 14485 709 762 1717 2741
998 11757 1748 1339 1338 1746 1352 5435 960 1723 14486 6296 1764 2674 1337 633 10521 7686 14487 3431 12784 1288 1306 1732 8040 631 1726 1743 1724 1750 10341 14015 1371 13153 1782 1777 1287 9403 1728 1305 962 13642 14488 14489 3918 8039 646 14490 1297 10537 1760 14060 14491 6337 628 10530 1729 1340 14030 1794 14492 11752 969 630 1773 1786 1727 958 625 1361 1775 5436 1351 11641 14493 3126 10547 2765 696 14494 2798 2769 11890 1372 1534 10520 1280 14495 14496 1345 3099 3125 14497 2758 8 2723 14069 14498 772 3079 807 762 14499 11755 1742 14048 14500 14501 2703
999 4910 10371 690 3609 4929 8143 702 2731 1716 3512 668 3560 1937 4078 8018 708 2835 10998 7712 1000 3612 3356 3524 999 2964 1024 4271 2787 3763 11301 3540 10868 692 4919 1540 5711 12 7707 4091 6128 3626 3593 3591 5012 3291 732 8283 14502 3290 11920 10408 3539 10374 3481 6044 9540 844 7828 11378 7719 5356 3248 3616 5656 5360 7872 3579 3794
1000 5916 174 14503 4597 4841 14504 383 14505 355 14506 4805 286 14507 14508 468 14509 485 5966 9605 459 9608 4756 275
1001 2645 3208 5894 5899 8515 5029 10584 7838 5881 5904 3302 3439 4070 8162 7556 13636 14510
1002 608 9930 993 5311 3477 575 3474 8457 5302 10037 576 2920 7533 14511 586 597 590 839 12191 12585 572 14512 623 12967 14513 7320 562 5289 10279 566
1003 826 5069 1540 760 2179 769 9506 3240 2835 696 17 692 860 2823 3250 4579 3635 710 12634 13386
1004 14514 9639 13089 14515 1306 966 13153 14516 7361 1529 762 4720 11147 5029 12213 11181 8031 3302 6328 14517 4685 6331 14518 6317
1005 3490 2134 1602 2680 7277 4178 762 2904 3484 2760 2787 19 4886 353 120 14519 14520 5917 240 4830 121 5915 1537 7052 3498 3798 649 2801 10394 1683 6046 11071 14521 5020 3309 1826 7652 8750 842 2886
1006 1778 14522 7692 1444 813 14523 6765 3544 88 1005 5351 14524 14525 14526 14527 14528 3184 3315 648
1007 75 14529 8403 1683 11808 3678 9155 10891 14530 7639 6740 762 3598 14531 14532 3623 4911 7314 9138 14533 1533 8412 8320 12313 3561 6798 9104 14534 14535 14536 5175 10234 2852 14537 5181 5044 14538 14539 10800 14540 12907 14541 5396 13282 14542 3632 14403 14396 8417 14416 14543 14544 14545 14546
1008 958 5439 14547 8449 11797 14487 8444 14548 14049 10547 4991 12827 14549 14550 9501 14551 14269 14124 8505 14062 10985 8039 8450 14552 10527 14553 1783 14091 14554 11889 14063 5429 14555 14492 14556 14557 5424 1354 14558 14559 1301 14449
1009 8972 14560 7830 3591 10822 5012 716 14561 5730 3608 690 6124 11024 3618 3683 668 5063 9983 3636 3624 14562 11385 2898 14563 14159 5069 657 14564 14565
1010 7895 14566 722 852 14567 4493 3570 704 12821 2180 8011 703 3291 5506 8284 14568 5876 712 816 5720 783 4083 785 14569
1011 7709 693 14570 696 5001 14571 11708 2857 5235 3429 5842 7414 14572 3083 7215 5270 2835 703 2833 6771 11033 5286 3649 2958 2964 3493 3516 5233 11388 14573 3524
1012 3218 4016 1639 1953 3822 8909 5454 1660 1054 7975 5227 1932 5511 1638 7339 1624 10 1053 2222 914 1812 3236 1910 8917 2747 4164 710 3045 9629 6308 3294 12997 6241 8563 772 762 5219 9425 4076 5642 2389 13069 14574 14575 2199 9432 8267 9431 13817 3223 14576 9758 906 7968 1847 9895 2942 2799 14271 703 1616 2701 8764 7937 1068 8188 1256 9754 1157 1244 12307 1816 7124 2009 11106 2445 9747 9796 14577 14578 12140 2248 3372
1013 4091 7808 7815 3564 7411 6124 14579 6131 7439 14580 14581 7137 14582 4505 3284 14583 10474 4970 14584 14585
1014 6733 5496 3063 693 2814 6723 7412 7079 4083 8707 1534 9256 4928 5050 2015 3075 8300 7234 14586 14587
1015 1540 5014 79 712 3605 6652 855 2022 2941 731 6254 4497 11040 3601 3489 6654 88 678 6252 92 3667 11077 2902 9263 783 1707 6883 11 821 786 8624 1003 2718 0 3245
1016 799 1141 4270 1645 4183 1393 5227 1642 1157 4173 1639 918 1391 4548 1103 5096 6091 7540 1091 2680 7341 14588 1045 1378 5511 3702 783 2637 768 11003 3427 2874 666 1538 7880 1529 1546 10047 4310 5116
1017 1336 11919 3684 2269 1893 1970 10 13130 13121 7339 8267 1826 1156 2342 3719 2440 2309 2109 2507 2705 2541 2492 2196 14589 14590
1018 1937 860 674 3426 85 6158 736 649 2787 3045 737 4294 2721 3606 7046 3291
1019 892 4036 770 11592 1130 8197 1067 7339 6999 2445 7752 7341 2602 14591 4555 14592 2630 11517 14593 1857 2594 6500 7394
1020 1624 762 2134 1090 2714 3137 0 2740 772 649 824 704 5869 2737 2782 827 710 1540 7613 3518 11650 8649 3130 3483 7130 3258 8232 2818 4284 3430 14565
1021 4513 4527 1645 7699 14594 4450 1486 1317 1438 7780 6204 3266 2335 4364 4538 1436 4515 1068 12646 6207 3822 4534 7187 1388 6606 1428 1336 6607 6400 4521 1324 1447 6662 14595 4207 5777 1384 14596 4531 12576 5542 5755 5618 8195 1473 4476 7803 1152 1399 4334 12486 4548 6712 4114 6554 1040 4520 1053 1149 1518 1837 3268 7485 12716 1247 5005 7775 8253 4180 1421 1640 4518 4395 4170 6068 5 4327 7191 11531 1145 4221 4630 1321 1104 1439 1253 5465 1502 5517 3458 1971 1202 4408 2199 3262 4375 4355 7750 2686 3820 14597 5091 1507 14598 1109 4559 1928 1412 1619 13926 1034 1066 9020 1901 2971 2685 6241 7129 902 4612 5209 3278 1102 1512 1055 1798 1130 1241 4158 1604 6243 4126 4425 14599 4197 1459 918 1031 4385 892 6 4530 1561 6187 3702 1134 7196 14600 1320 1458 1510 904 6193 1051 2509 11020 4343 2700 4440 10 14601 7166 4471 9660 1327 1463 6174 1073 1045 10092 1047 6247 799 1967 1136 3358 4555 13834 6443 1793 4633 929 1156 13713 2559 13714 1478 7822 4328 1393 6190 6164 1322 8205 10251 1091 1046 4359 1250 10691 1482 7515 1244 1406 3050 4462 3726 4444 14602 4707 5543 1330 4876 7038 5079 1157 10658 4484 7199 5256 7783 10743 1318 1441 1187 6702 4879 8721 1240 6239 9751 14458 1483 4488 5363 5239 1050 7 7827 7944 4075 87 2680 10783 1254 6974 1487 8959
1022 1831 5786 7468 1121 3378 5007 1077 7804 2607 1098 3225 3377 12031 1890 12365 4048 2320 3359 3396 8129
1023 3201 664 7556 749 3836 12251 14603 7928 758 8521 14604 6368 14605 12285 14606 12560 14607 14608 5898 4685 13338 6315 12233 5885 7927 8569 14609 9037
1024 1828 6663 1195 5640 2131 9736 6687 5603 1837 1558 1061 10587 8222 14610 2227 1062 1452 2669 12350 10315 10901 14611 14612 2155 14613 1854 14614 2157 3383
1025 9219 824 92 12849 867 5669 2176 3281 14615 5691 683 4238 5188 2855 5056 14616 844 5488 4081 6651 5350 14617 3523 1446 14618 2785 4897 700 2708 11007 811 804 14619 14183 3541 3516 3649 5668 3793 6977 6274 13499 8526 14620 2967 6018 707 4164 1542 3756 851 2956 14621 5489 2866 665
1026 9029 1528 2956 2785 11 1530 649 4656 1547 4161 827 1717 4111 90 3518 2708 2782 2794 714 774 2938 5153 5504 6197 668 4997 1853 1001 4996 2713 2820 8171 710 1025 9241 794 10797 2718 6918 2784 14622 768 12978 7323 5020
1027 737 14623 3129 4981 8171 668 1541 4301 4656 10489 981 11036 2718 3497 76 649 2737 5869 14624 81 762 709 2812 2741 1717 715 819 10797 4111
1028 10686 7769 1053 1378 1130 1393 6207 782 14625 2684 6211 2025 5592 2206 914 1377 14626 1102 6602 11502 1645 4484 1503 1451 4339 4168
1029 1156 4167 6215 8220 6434 4606 4185 9010 9006 9228 13212 4198 6524 14627 6484 14628 6610 12923 3704 12128 8709 9001 6401 918 12512 6419 10349 10350 7020 14629 14630 14456 14631 6636 14632 9009 10857 10744 6565 14633 6391 4651 6412 2227 7827 1109 924 6454 1893 6399 13134 6432 6394 14634 14245 10353 14635 14636 925 4513 14637 8373 6468 6392 10632 11978 11883 1642 12930 14638 1589 14639
1030 5004 7368 14640 14641 2820 2718 999 5870 2708 4161 812 4244 11 3484 3062 1006 2877
1031 2927 657 786 2902 3421 1025 15 826 2803 3254 14642 10192 6490 14402 8752 5398 10191 9498 14643 9985
1032 14644 8584 3622 5234 2826 2837 7310 14645 5351 3767 9148 8707 3630 668 8596 3633 5493 7652 3552 10389 774 4791 2936 14646 14647 6049 5660 5268 725 14170 3611 14648 10367 4492 14649 4963 5868 2770 12638 8412 7228 3600 12614 9265 7242 8332 1541 9562 14650 8684 14651 11896 5177 5061 6960 10436 4999 7428 13668 2867 8433 4506 762 14652 3804 10497 4312 13019 14653 14437 14654 9277 5023 10456 2781 2829 13372 10470 14655 14656 6703 12906 14657 6719 8419 8692 2739 3818 14658 13023 14659 13552 14660 8640 3654 14661 8329 7335 14662 8756
1033 5901 9030 13629 6589 10577 14663 6019 11698 3209 5899 11178 10578 5904 3447 5886 11696 13423 6305 9036
1034 3624 10613 3626 2835 3591 1538 1530 11 764 4305 1716 1628 2826 9122 3422 4897 5046 7312 7315 3678 2799
1035 1353 1345 632 11926 1782 8443 640 3100 11931 5437 11890 1360 11761 7732 1298 7692 5417 5426 3094
1036 8672 14664 11397 10917 2780 8417 14665 10926 14666 14667 6753 14668 13668 10952 3787 5175 4306 9558 9761 14403 14669 5068 9582 14670
1037 4588 5504 1000 7337 653 7585 7608 981 1443 7233 649 2720 1540 827 710 1549 1682 1628 12 738 821 3507 1003 11 1006 4859 1541 2902 1025 8341 783 2706
1038 5678 3519 14671 5242 668 6027 5799 2835 1934 4903 3655 4302 740 3781 6809 3678 8628 14672 14673 4303 3782 742 3797 8012 7813 3312 3582 14674 843 9174 3673 5346 5068 10240 3683 14675 9287 9278 9279 13018 14676 14677 716 2821 2875 10111 14678 8756 8318 5339 14679 6798 2891 14680 846
1039 87 3240 8920 691 649 12312 6197 769 3061 7813 729 690 2708 5046 3629 4282 14681 6522 2913 14682 2124 2096 6683 14683 14684 722 4996 1025 765 14617 2964 1443 14685 5014 3583 826 4293 4580 5282 8556
1040 5504 6715 814 96 693 1446 84 826 2168 626 973 13014 14686 1718 87 4859 14687 1853 768 5350
1041 9972 13431 5871 668 5669 848 5702 4332 2828 93 783 5231 82 2179 2877 4586 8232 3356 8668 11895 5063 3424
1042 6572 1596 6662 1598 5637 1046 1621 660 3050 1594 6096 1972 1176 1172 909 7177 1323 1552 1205 6576
1043 7395 5772 1812 1454 1212 4157 5733 3346 5258 2468 2110 13470 11366 7297 1696 4570 2080 1848 7971 11753 2664 11553 1231 14688 1407 2603 14689 2379 2389 1638 2597 4665 2599 14690 14691
1044 4168 13799 10069 5825 1378 2973 1385 803 6573 8180 7695 1373 10636 2376 6680 2320 14692 1998 8882 12574 6096 1149 2255 4523 7199 12009 1932 12368 4876 1421 10765 9208 4517 4138 14693 1696 1817 4133 4621 1448 14694 6702 9223 1402 1377 6071 1923 5255 5627 1191 1477 1324 7986 7803 904 1441 4144 7797 3268 5363 1329 3749 1249 14695 1467 8258 4630
1045 259 256 14696 14697 19 12440 225 5952 470 202 12428 47 9509 334 4833 14698 14699 209 181 159 12413 14700 3001 4811 14701 123 157 436 5914 4884 4885 5930 361 277 14702 363 170 293 8025 4837 39 63 5960 199 4816 41 5955 4834 4839 427 4716 14703 472 14704 300 14705 2989 503 5920 4830 5934 4823 4827 14706 446 14707 240 14708 304 3025 318 262 14709 236 529 14710 194 14711 156
1046 601 991 7660 561 571 2921 14712 10020 14713 828 4681 12091 12098 14714 577 4675 9955 12089 12974 10028 1678 14715 4855 588 569 604 10037 12972 10033 4677 1270 562 12096 9936 555 558 12178 4699 10908 841 595 3473 10034 2922 574 12183 10285 2924
1047 5788 5774 6389 1098 1053 2110 2255 1812 3218 781 1639 5810 3287 1111 2491 8880 4356 2389 1805 3230 1077 1785 1887 5745 5772 7968 9533 8486 5767 13174 9449 7977 1706 9432 11231
1048 1176 10350 10857 6453 899 4483 1081 4445 6565 6432 6443 6180 14239 14716 14717 14718 2602 7399 2389 5512 14719 1040 14720 11982 11879 2192 5758 14721 1114 12399 1115 2189 12002 14722 14723 5788 14724 13 11836 14725 8883 14726 14727 7404 14728 14729 14730 12871 5816 5780 1814 11980 1569 10640 14731 7518 9458 1621 8845 7400 14732 1184 5126 14733 14734 1661 14735 14736 5782 1508 14737 11977 14738 2436 14739 1706 9432 2212 11354 8818 4155 1196 14740 2063 5458 14741 5791 1927 2275 7302 14742 14743 5741 13288 9459 13936 2084 7882 8942 7395 14744 13090 1524 9070 2247 14745 9746 14746 2390 1426 8385 2596 14747 2511 2046 14748 1249 9838 2172 11952 2478 14749 4112 2204 4665 14750 7552 9843 11501 14751 12397 14752 6178 14753 14754 8238 2298 6407 2353 9026 14755 1816 8962 2260 14756 14757 14758 14759 1167 14760 14761 6563 12999 11275 9427 14762 14763 4661 2325 2044 14764 14765 7255 14766 1481 2609 14767 14575 8858 2394 2474 14768 14769 14770 14771 14772 8201 4662 4486 9430 11235 14773 14774 12048 4296 14775 14776 5743 14777 14778 14779 12857 14780 8945 14781 7905 14782 14783 9822 9907 4489 2320 14784 3345 14785 4339 14786 14787 2294 14788 14789 14790 2224 1056 14791 13413 8911 14792 2544 12030 2545 14793 11976 14794 10973 14795 1496 14796 2585 14797 13314 11254 2330 2130 10773 14798 1850 14799 1703 14800 14801 14802 14803 1084 12751 10689 910 9775 11529 14804 14805 9614 14806 14807 14808 1598 14809 14810 1075 2097 14811 2316 14812 14813 14814 14815 14816 14817 9436 14818 14819 10991 14820 8564 7548 12925 14821 12385 14822 2424 14823 13178 13749 14824
1049 7892 847 10605 4078 3077 3689 14825 6651 8688 14826 6059 7238 14827 2731 3054 10228 796 14828
1050 3630 5868 3684 2175 5271 5351 2844 5173 8636 3651 2826 8656 3779 4934 4331 2811 4935 8311 2859 3783
1051 13792 7307 2641 14829 14830 10829 14831 10413 5719 10078 10469 14832 79 6268 3584 7808 12889 6801 12155 5711 2880 6799 12608 14833 8639
1052 743 3167 814 5504 14834 1940 10060 12410 14835 11181 3302 14836 745 14837 3280 14528 14838 14839 4793 14840 636 14841 6943 10118
1053 821 981 4711 7422 1709 2753 1940 4709 6198 769 860 93 3248 3057 842 2909 6254 9401 710 676 2842 3495 3426 743
1054 9835 4270 1255 3820 4451 11545 5106 5777 1638 10066 7017 6108 8246 1520 1244 9345
1055 14227 918 6214 1922 1053 799 4187 4644 14842 7161 12010 11664 4365 1257 3379 6215 1520 1104 1855 4605 1805 5094 6540
1056 14843 4589 3588 3592 9235 6707 4915 8389 666 7079 5354 5270 2757 3490 4991 6047 2780 2835 1684 768 5054 6750 2860 807 1001 10612 3130 2640 10755 1937 3593 7829 6756 699 6952 3587 6733 3562 8303 3323 4302 703 7440 3686 5846 6835 14844 9106 6927 6049 4092 14845 6836 3626 3640 6789 6708 2014 6651 13320 2801 8578 4500 2643 737 2017 2868 4273 11377 5499 5848 11810 2894 14846 14847 2883 13651 6703 652 8984 3624 11286 13662 711 656 3076 3602 9194 3596 14848 3647 2842 2876 5356 3067 6753 2895 2774 2781 2849 6931 8603 4945 14849 9132 2925 4939 3603 2786 2012 8143 14850 11920 6894 4284 3483 3651 2958 716 3777 8284 14851 2726 9556 13675 7315 846 2825 2864 2872 857 3604 4928 3690 3053 6036 14164 2898 814 2838 14852 3691 11226 5278 5692 3530 14853 729 5063 6779 3305 14854 3817 6385 3639 14855 2927 2706 2804 8672 8300 15 9981 7593 2902 14162 11812 7828 6954 5355 4933 3692 10347 14856 3782 5659 7216 3779 9542 10240 10389 5666 3650 14857 3771 4980 2863 6015 6050 14858 6795 2865 11065 8619 9252 14188 9138 4938 3324 2023 3801 10380 4957 8616 9365 8404 8636 5702 3783 14859 3634 5279 3514 11403 3688 7890 1534 3245 8318 3502 2897 8635 3557 8650 6044 9256 3700 8642 3239 5176 11056 4080 10158 8321 11229 8419 739 14192 8329 5023 2839 14587 12895 7432 14860 3796 8415 5868 769 8677 8667 5175 2832 14861 14862 11068 12891 7239 14863 1709 14864 8412 3259 3540 14412 8336 14865 649 3520 14355 6773 13446 13664 9129 14213 14866 14867 11694 7335 9568
1057 69 4863 656 2909 2818 1549 1024 3510 12 5656 11 2815 7746 1548 2734 653
1058 9545 0 649 4590 87 6252 786 2735 2904 12314 3133 4111 3167 14868 14869 877 14870 4772 14871 14872 3932 6320 3421 3432 9636 14873 7332 7424 14874 14875 4783 883 14876 4795 14877 14878 14879 3174 6325 14880 14881 3179 862 4775 14882 3489 868 676 11041 82 1718 1532
1059 1076 811 1716 1446 824 5870 655 1202 2800 1443 807 2720 650 5504 764 6671 2914 1518 4474 1057 7132 1134 9016 1604 8810 4443 1139 1928 8574 1598 8248 1258 8229 929 6242 1104 4270 1620 1030 3753 8796 1818 5211 8919 4484 14883 5237 10257
1060 4350 1104 10710 2911 1130 1057 11291 4401 4138 1318 1317 4260 1091 781 1324 1100 9733 1073
1061 5117 11653 1651 11311 12365 5514 1835 6221 1076 1153 1426 2025 9839 14884 14885 2226 1646 6684 6223 1965 1044 1133 1380 6165 1101 778 5539 14886 12716 4408 14887 4360 1214 1251 1222 1470 1227 6237 5606 9025 2038 1258 2154 5222 1490 6634 6229 4422 9018 661 14888 9813 6232 4139 1086 1050 14889 10327 2618 6215 11105 14890 1116 1381 4206 14891 1327 12711 1124 3740 7786 1226 8354 1109 4227 5199 1119 9685 9710 11279 1134 4144 1460 1459 4530 1176 5542 1103 1250 2974 1828 4399 1455 5468 1321 1084 10305 2701 7822 8921 6181 2093 1715 2445 7450 4570 9650 8355 11100 5363 4455 1090 9092 8267 12581 9707 1104 5467 14892 10787 8272 14893 1204 10092 7539 9766 3371 9735 14894 8369 4667 2699
1062 4836 376 176 9592 4886 2972 227 9593 436 406 14895 5916 14896 4813 14897 12456 244 222 208 355 231 12129 4806 2724 8 14898 3018 14899 14900 14901 5985 14902 14903 249 11412 243 14904
1063 1941 2785 981 3590 3248 1001 2638 2776 696 817 3483 5647 762 3426 1444 2723 1626 2849 6717 800 13438
1064 738 4585 1001 2740 2179 807 4311 3487 2767 6253 826 5188 1005 811 822 82 14905 2787 14906 1551 2943 4284 2851 2904 2812 2741 4590 3422 80 2791 6732
1065 817 5504 77 8697 999 11 981 7585 81 2943 1006 3559 9972 13431 1016 1716 721 7830 87
1066 4928 5040 3063 7892 857 10862 5677 2878 4494 9171 8280 5056 3763 14907 7445 5234 5063 3648 6745 14908 3621 657 3519 12155 6729 2786 14909 10107 14910 3639 8755 4979 2849 5649 3077 3678 2959 4273 12066 4301 3632 1853 773 2899 10892 14911 648 13669 2835 14172 3601 9552 9198 6819 5723 6256 6044 3683 7238 3802 3667 4082 2176 4282 3074 7595 14912 7645 10610 8706 3071 8012 4111 2873 8415 14913 7828 14914 14915 5795 6964 3688 8402 14916 9241 14917 13240 3618 10221 9107 1934 6742 14848 14918 7611 14587 3083 8411 7816 7829 8305 2731 6835 716 7644 14919 3482 3064 14920 14921 14922 9562 10450 12887 9542 6753 14923 14924 6787 14851 14925 5506 2170 7546 7544 6063 2901 14926 846 3076 11417 7228 14927 13562 14928 6718 6716 6792 14929 14930 14931 11382 14932 11811 14933 9177 7163 14934 14935 5319 8403 7653 843 8693 8429 710 14936 8750 14650 5393 14937 8600 14938 14939 11376 14940 14941 14942 3602 6764 13792 8298 5024 3312 14943 14944 4280 12938 14945 14946 3807 12676 14947 14948 3309 9567 2963 14949 14950 14951 3245 2894 6135 12859 14199 7280 14952 14953 5841 3508 14954 13676 2860 3501 14955 6931 14956 14957 14958 14959 8285 14960 14961 12905 8749 14962 10079 2858 13588 8704 14963 14964 7581 14965 14368 9983 14966 11810 12164
1067 2737 710 11 654 3498 715 1535 1443 12313 824 2720 2785 6254 6628 82 1004 771 1718 1015 9 999 3045 13320 2014 81
1068 2637 96 2874 831 1310 10043 574 14967 4692 3478 738 9545 8556 2835 1718 2939 3250 6732 8752 5188 685 14397
1069 1052 4334 1040 1143 1105 1109 1567 6606 6170 2973 1138 5542 1385 13 1971 1645 4399 778 10 1073 2236 1487 1130 9826 6214 14968 1145 14969 7002 1068 1031 10251 1499 7151 4428 1500 1132 10099 1501 1134 4283 5836 7195 8717 7001 1387 1053 13299 14970 4403 6239 4359 1114 4257 7495 1472 14971 1455 1513 5607 1253 14972 10660 1250 1257 2010 4444 14973 10591 1136 1458 4881 11576 12758 5362 5363 7822 1152 5536 1427 1244 7187 12520 11956 6605 1489 1003 781 649 11 81 1413 1248 1067 1498 786 10663 8792 1643 3268 4610 11745 1104 1161 6447 927 5518 890 4559 12914 14974 10949 14975 1030 13624 9663 14976 5 1260 2036 1153 4391 13741 12153 14977 2911 11505 2700 9020 2932 1111 4515 12338 5226 4097 9688 802 11508 891 7108 9789 7107 2166 4341 4172 10096 4234 7 4213 1519 3448 1818 1493 4021 4562 1142 10094 1452 1245 7771 1604 1378 4126 2085 9751 10951 1515 7354 14978 3274 2009 1380 1428 11555 1034 4218 7944 3456 14979 14980 11739 1481 1249 5113 6225 10642 3272 1409 1056 14981 4339 5821 13731 928 14982 12912 10005 8778 13892 13734 1524 7501 780 4106 14983 2178 2593 11498 1657 2461 1902 2064 1038 11532 7631 14984
1070 2206 4396 14704 1031 9676 8138 1607 9094 2363 5600 1604 4120 4122 1804 1110 4443 4144 4361 1043 1114 5753 5608 1077 2232 4128 1245 2162 1320 1134 6389 1182 7291 3275 8184 1795 1230 1111 1149 4200 4372 1138 8946 8879 1924 4267 14985 10620 4548 2093 13071 2227 10938 9448 13714 1328 2330 2916 7618 4137 1256 8176 14986 5453 6226 1862 3346 4685 1438 3338 7550 7032 6674 2104 14987 14988
1071 868 2746 5504 4995 2179 1718 93 5906 0 14989 77 711 1685 1717 657 2737 1541 4657 2907 9087 2902
1072 1000 852 1443 2720 2770 765 1684 8 2772 12 2686 2801 771 868 2779 5018 2804 2803 17
1073 2733 3055 2796 2014 10052 96 2806 3168 2791 657 4503 3133 2902 2959 6057 6717
1074 14990 8296 5053 843 2883 5854 6835 2858 3625 2849 2020 13677 8592 3686 3678 14991
1075 14241 929 6085 4573 6554 4179 2618 6084 10357 4867 6214 14992 6118 4362 4633 1441 1174 1156 4619 6075 4601 10350 1505 10355 7618 7296 12923 1447 14993 4608 14994 3268 1604 3342 4443 4621 13375 6242 10623 4606 9667 12010 14464 6383 13229 14995 14996 7341 1170 10362 9322 6452 4024 4590 774 6408 14997 12275 14998 5239 11575 803 4644 7096 7324 784 14999 5136 15000 1989 15001 1616 1072 7623 1316 4653 8199 5530 15002 11934 8722 15003 11478 13481 4223 4655 9065 2333 15004 7209 6616
1076 1377 4548 918 7189 5134 1239 1241 1393 4876 8205 2663 4440 1141 5602 1837 1048 1137 1432 894 927 1429 1384 1473 1143 6247 7827 5453 4528 4417 5008 6575 4144 1327 904 10659 1470 1402 2084 15005 10665 15006 799 923 2028
1077 4343 2663 6982 1065 1569 3273 4404 2678 1111 4137 1048 1060 1199 1612 1254 15007 9026 3365 15008 3364 4172 1879
1078 812 2236 4032 799 4548 1971 1126 1108 1441 1053 15009 3289 4343 4144 1457 1378 914 4613 1102 4072 7342 1459 1458 4458 1031 5567 1320 7799 2127 1436 6614 1073 1253 1512
1079 14575 11856 7481 1639 7803 15010 1401 1243 5255 5766 1473 4183 15011 1377 5807 7802 7823 3703 2324 8256 2083 1412 2605 4324 4425 8880 15012 1946 5452 1239 15013 15014 1817 2596 9435 15015 5765 9446 7826 1969 3295 4459 2245 2093 1437 1494 9229 4433 4513
1080 2959 1550 1530 827 824 860 769 3045 2017 2637 4164 669 2726 3129 3638 2815 649 1003 3426 2711 92 1445 2787 771 10267 1941 1015 868
1081 3838 665 786 774 688 4111 783 3421 77 8232 868 2019 87 8392 1534 11035 2866 1782 8940 1307 1351 7732 626 15016 7147 776 15017 8427 5872 69 2941 731 15018 3045 7881 2902 669 2179 973 15019 7853 12822 1731 14153
1082 4458 1090 2491 6696 7459 7309 15020 11308 911 10740 8900 12574 1380 4267 929 1420 1121 1136 4352 1737 1848 15021 4193 2259 1239 1331 6687 1927 1640 4540 4205 13815 1124 1897 5117 1251 2037 4443 5786 1601 2584 1055 4396 6211 1441 1054 11561 4297 3706 1176 3343 1101 1048 6690 1243 5518 6636 8193 1378 4881 1230 1085 7619
1083 1604 1040 1165 1104 1143 4449 1645 4515 1073 1076 9656 1065 1473 4465 4472 1601 5209 4631 4455
1084 11 1716 769 1540 2814 1003 714 90 3508 772 4589 783 4284 12 3480 10942 1000 653 3768 703 844 5188 2930 774 3525
1085 4796 9972 89 76 15022 768 11355 10218 811 7597 7870 4800 5146 4294 696 810 11286 7409 4911 4495 3564 3593 15023 9243 15024 2879 2897 5680 5000 5799 3304 10827 4274 813 3570 11035 690 3317 15025 653 13437 15026 2930 2893 2771 15027 2909 7333 15028 2744 847 844 673 5049 766 4110 4904 7584 4930 10393 10472 3584 4791 10730 15029 10586 7879 5019 8 8597 649 15030 10381 4909 6660 3574 1005 7978 7890 2951 5674 15031 10382
1086 12525 314 9916 15032 208 457 12468 176 468 180 357 15033 477 341 231 204 5974 368 5952 168 15034 519 12836 181 15035 6013 9510 15036 9970 9591 15037 383 398 15038 15039 308 481 14898 15040 15041 6010 15042 3027 496 313 15043 15044 15045 490 49 15046 15047 15048 495
1087 711 7719 5037 7453 3309 15049 12896 12630 15050 10569 9247 15051 13038 9365 15052 13023 15053 15054 15055 13036 15056 15057 5270 15058 9139 15059 15060 3759
1088 15061 8702 15062 15063 3980 883 3174 3179 786 4581 4497 868 1551 1941 814 3518
1089 4135 1828 2040 7389 1418 929 5826 4443 9775 10936 11833 1964 10899 6401 15064 6403 15065 15066 15067 2566 1805 5465 3272 1147
1090 8203 1846 7468 3218 1798 4400 1910 1909 909 8947 7309 1837 1721 5807 5803 2052 1638 7339 1812 4149
1091 4301 2815 693 6765 3556 6268 2964 11286 762 5666 9220 3695 14618 9250 9237 11047 3313 3647 15068 2637 3563 844 3130 4081 624 704
1092 566 554 834 572 6066 558 3463 1673 613 995 576 577 7531 15069 567 7524 571 3477 6067 4847 15070 562 568 839 603 996 608 1666 4674 9929 1665 5161 614 15071 2919 1678 10279 4692 557 8139 7318 5293 7272 589 594 553 4698 601 563 838 1676 1310 987 587 998 15072 597 1268 12586 4696 10285 4150 7320 4682 15073 8457 4680 560 8456 4675 2921 580 9931 605 1313 4849 828 12100 611 586 585 617 3401 5259 3411 10014 4853 578 5163 4688 4693 575 612 574 4041 947 607 6064 1272 3408 3410 8507 3395 8121 932 3394
1093 4137 2484 5781 8947 8882 3335 5736 4157 8900 1045 4328 2095 12212 4117 4155 1323 1840 10654 1831 5789 4172 1785 1157
1094 1176 1377 4144 1518 4145 7889 4450 1156 2974 1658 7195 1240 6576 1329 14225 1458 1480 4126 4204 1438 6185 1647 4327 904 1244 1245 1322 1250
1095 6982 1598 4103 1109 8709 1130 15074 2972 1593 4179 5809 890 3268 1243 2684 1054 925 803 5362 2974 6092 4388 1321 15075 3825 1887 4172 1696 13058 4364 14716 4105 15076 6 6549 11491 4548 5518 15077 2681 12923 4476 8182 2632 1078 8240 659 11979 6991 8538 9011 2093 11479 4365 2345 7827 15078 12502 1221 6580 13814 1211 7910 7802 1461 1520 7199 4880 2620 12127 13625 10623 6408 11692 10364 11919 1316 6105 6111 909 6108 8946 11913 13490 1992 11886 15079 10642
1096 848 15080 2866 3480 3429 4325 3556 3083 700 2753 13499 2707 4271 1709 14622 5014 3057 11245 11286 771 1017 7352 15081 812 8592 6268 8231 81 6269 6384 703 5489 5188 2905 710 5370 2941 5149 3594 15082 2012 704 766 14686 3760 2835 4495 3506 2908 722 15083 4731 3782 4237 2897 15084 15085 723 10048 2017 2821 9 8 5270 9390 2775 8657 4963 10730 96 3055 3248 8601 6717 9241 1532
1097 1046 1624 11906 8202 1102 1482 1031 8574 1170 4441 4270 1117 1149 1623 5 7121 11581 5465 1901 1902 2700 15086 8818 3050 12648 15087 15088 15089
1098 5876 7954 3061 4279 6826 5658 8584 3602 5499 7440 2836 842 5507 15090 2958 15091 3500 6927 3584 9101 3763 2182 2020 12779 12161 15092 3626 10834 3611 3807
1099 696 6819 1853 3482 4307 15093 1937 4928 981 690 3605 3601 657 701 710 708 2835 4711 3430 8319 716 3760 15094 3512 13541 5073 3618 2868 3493 6659 8333 13038 3593 9570 14966 2848 3606
1100 1087 4567 1057 1056 11531 1657 1031 4435 1091 8194 7888 2609 1385 1097 1250 1329 1336 1318 13754 11529 1259
1101 6989 1558 1583 1570 15095 4422 15096 1026 1059 1706 2902 12313 769 1003 8020 2759 2724 771 2737 2904 2765 14642 3645 1548
1102 4633 6075 6093 13802 11913 4170 1638 7096 15097 6108 6408 1156 4654 2320 2058 15098
1103 1645 1130 6692 3287 1149 1315 3218 5461 4404 1378 4874 5833 7793 7827 2609 15099 15100 15101 5253 13294 6603 11105 15102 6443 15103 4459 12209 1657 7202 14287 15104 6634 15105 7897 15106 7773 15107 3723 13230 12383 12993 15108 6192 15109 5093 15110 13225 15111
1104 4258 4199 1658 1082 3747 1442 6290 1249 8272 1848 917 6265 2705 11083 11954 8355 11335 9792
1105 7751 1066 4155 781 1323 7791 3450 6680 10687 4183 2162 10349 11293 12353 1404 3452 2911 14694 4128 2822 3824 13403 1114 1383 6206 8473 1482 1152 2663 7099 4135 9447 6239 1409 659 8558 1903 1470 1109 5132 4327 7821 2110 1707 648 799 6097 8142 1073 5518 4173 4126 1486 4177 1646 1126 9660 11279 8268 11712 1253 4376 4444 1837 4076 4202 13057 10623 1104 1320 1457 1640 1797 1111 1604 1378 4450 4880 10683 5134 5204 4872 5517 1329 5468 2227 3749 7699 2052 1608 2274 3045 5492 7337 1438 10066
1106 6154 3052 2718 4111 670 783 4081 1446 2866 1547 1003 8206 2835 9972 11 3317 4914 1001 15112 657
1107 7751 6096 1486 5786 10932 2111 1828 7825 7977 9898 2669 1810 2160 8604 4443 1923 2029 1831 2607 2346
1108 3326 7787 9588 10690 15113 12300 3710 5215 9694 12387 2972 3725 14306 7030 6557 8214 9395 15114 4234 15115 15116
1109 4608 6517 4390 6070 11746 11820 10854 6234 4565 1379 11415 11910 4393 4447 3295 2619 8994 9379 6069 1837 11524 1518 4646 4355 15117 1109 7907 1151 15118 11946 15119 1373 4345 14601 8227 1156 1879 1152 1396 1378 6475 4463 15120 4515 6093 9662 1134 2102 4357 4874 1432 4227 15121 1383 3268 3722 3739 7977 11913
1110 8201 5460 15122 2255 5453 1065 8360 1055 1696 1051 4296 1837 3751 2320 4136 5630 1123 1418 1033 1737 2238 10748 2052 7905 3217 1597 4199 2330 1046 2191 1216 1434 5790 2667 5219 7552 1049 10 12304 1887 1392 1105 2299 1995 8179 8348 6261 8885 1953 8204 8347 4364 1621 3227 5603 5781 3260 11568 1615 4515 4516 3273 1176 1436 4178 3342 6243 2066 7294 4544 5776 1459 1378 1048 8475 1927 6267 12306 10274 3706 1454 8886
1111 3588 2715 3638 2709 2801 12017 6659 3651 2742 785 10730 796 10504 9285 4509 13036
1112 1143 1091 7608 1717 3278 4522 5577 1127 1567 5202 9656 769 3495 2814 1006 821 3567 1540 1000 7613 684 1003 11 5210 709 3518 8587 1443
1113 7306 10350 10775 9894 13208 1094 15123 4321 15124 15113 14312 9320 15125 15126 10904 4491
1114 2337 1134 4874 1604 1146 3747 6677 1451 4204 6246 1463 1482 1435 4477 7112 5831 4401 1983 1104 1393 1518 4126 4630 7826 5542 4425 1152 914 9025 1097 1321 660 10249 1412 7885 12153 927 1145 1420 9020 1091 4213 1138 1244 1109 7195 1073 9210 7944 12694 1471 8267 1481 1188 1432 8959 799 9761 1149
1115 3745 5045 1243 1645 4221 15127 4144 1460 685 704 1467 4528 4419 1587 4075 15000 1654 9028 15128
1116 5626 4181 10944 15129 13378 3821 12360 4187 3746 15130 4573 7017 4868 4015 15077 4394 1314 4198 1504 10688 898 6569 11844 6104 3825 6480 8955 14999 1644 10700 15131 1316 12512 14718 1129 8954 9629 15132 15133 1318 7506 1992 15134 4544 1948 10317 15135 15136 1254 7115 4036 8192 12010 14668 13881
1117 5491 4279 2828 3550 5355 10612 15137 6144 11052 3583 15138 11033 10394 3062 15139 4940 15140 1711 6808 15141 15142 1941 11817 15143 4906 15144 2013 2865 12549 8695 2767 15145 1017 9893 7896 7425
1118 4198 6108 6415 1442 4435 1518 803 7902 5465 1046 8254 4322 3425 2931 15146 9730 10654 7132 7450 9734 4474 1189 4543 5198 15147 2677 5538 8244 6990 15148 8759 1129 13 15149 9733 2687 15150 1253 897 1509 3371 2222 2548 9788 9748 8764 8835 7910 5528 12927 1256 4020 15151 1596 15152 10321 15153 9024 8560 8195 6308 8271 4603 1104 1948 1979 1805 2678 11628 1038 2705 8740 11647 8034 1457 7124 7901 8267 2057 7075 15154 15155 7041 7945 11101
1119 5658 2964 812 2709 10755 7830 1443 12062 4164 2820 771 3518 15156 6878 9136 5012 696 6652 2638 3595 5069 2012 3500 2713 2767 8599 15157 12 811 6763 2897 2859
1120 5591 1518 12716 1243 4538 2026 1143 12409 1322 10092 5079 4454 1242 1468 2093 5117
1121 1446 6216 5640 11600 15158 10991 1646 15159 5485 3247 4322 1124 1165 8367 10268 10133 1442 9822 2021 4339 1110 1588 14668 11547
1122 3489 6197 6142 11377 8298 2883 4497 8 8294 6748 6797 15160 3083 2744 3778 3051 14920 7581 3129 4710 2753 769 1444 8399 8331 15161 11065 11409 6061 15162 15163 7652
1123 7522 4854 8457 580 4674 3088 586 15164 3096 10776 300 13 8355 786 1500 1438 1459 11781 15165
1124 1924 5101 1440 4388 1404 4264 1249 9062 1245 10660 1143 15166 10591 7190 12391 1073 3379 15167 9472 7151 918 5808 2559 2506 1057 13760 15168
1125 1045 5228 1534 2794 2739 7052 2722 2821 2787 2800 4991 772 2823 4500 6271 12117 1548 3496 3490 2706 776 15
1126 1373 1052 10259 1086 3266 1646 661 4318 1044 1567 5750 4200 1076 7121 4209 4178 11758 1043 2206 1206 1033 3750 4102 1133 9681 7415 4125 3273 1422 1202 2916 1129 1207 1425 5136 1090 1385 4270 8964 13 11914 2679 3050 2137 1214 1201 1818 2143 1420 1448 4609 5566 13222 1661 3048 15169
1127 929 1121 4483 8884 1198 15170 7203 11235 12134 1569 15171 1255 2136 11233 12142 1175 1496 12869 15021 4270 918 11256 1696 14730 7193 924 15172 11980 14465 15173 1473
1128 6215 5469 2160 1089 5577 3421 5504 1445 1547 1716 11701 4711 87 721 15174 8209 6191 1323 1084 3823 3827 1059 12410 1615 4365 4115 3828 15175 6076 4367 8257 1126 10857 3821 4320 1202 1566 13223 15176 7911 1464 1171 909 1119 4183 4339 1121 15177 4144 1458 1461 15178 4878 1109 1453 1145 6535 11021 13880 11947 1891 2702 9869 4128 4422 14996 2932 13876 1491 1466 9061 6206 1990 1321 15179 4630 15180 5193 10941 4390 4623 10775 4207 8265
1129 2718 670 4284 4326 2800 2909 2787 6671 4500 4996 774 15181 7939 2712 721 13046 1019 1025 6057 11290 15 773 1542 2944 4588 3245 5020 2942 2799 13443 9153 12825
1130 1197 6246 1869 2465 1886 1990 1175 4137 1143 1095 2269 3287 2056 4178 1828 3338 1867 1964 2156 1985 2466 4264 1418 1198 8181 2071 3278 4354 1892 1048 2191 5818 2319 1922 1832 10641 2063 2140 1139 2158 8729 8228 7449 4892 1045 1105 5209 1995 2330 7473 2618 10244 11854 4555 1206 1119 1877 15182 4394 4443 4610 15183 3455 1026 10742 6587 3050 5465 15184 4268 11833 14633 2086 2008 12304 7455 12867 660 8184 1061 2051 2340 2317 2093 15185 3267 2104 1509 11847 1057 11309 8216 13833 15186 4435 8719 1989 7389 1220 915 13809 8180 918 15187 1426 4535 12069 7695 1971 7479 3343 14993
1131 683 2733 4495 3326 814 981 8697 1717 82 1532 765 2926 2725 4862 696 2179 3055 1718 2754 2750 2897 2742 2748 1826 2014 11060
1132 2643 7337 3538 2928 2736 1534 8604 2737 6197 737 2941 10117 2902 2782 2774 87 2927 3783 5147 5692 15188 12788 15189 15190 3932 15061 15191 4557 7605
1133 1151 2910 2911 2678 4328 1115 2380 893 780 5215 15192 1098 1218 5237 1048 1946 4128 1045 1645 6985 4299 1570 1104 3746 10317 1381 7791 1078 3266 4546 1721 7936 3273 5238 1661 4102 2405 1060 15193 8142 5620 5586 1075 1161 1119 11669 11099 1552 7925 8212 5136 1590 1660 1448 11605 4516 3049 1650 1103 1044 10243 3335 1094 1128 12383 5577 15194 1420 4270 2222 659 5548 1624 782 1165 4133 6230
1134 783 7700 2775 5906 4589 2814 10368 4905 4991 769 2800 5870 3354 4557 9549 3146 5153 4864 1015 2638 3490 2756 2781 693 13769 69 2904 10890 11286 5685 15195 7880
1135 2045 1886 8953 2027 3278 2192 5774 3377 1701 3340 1051 15196 1691 9431 15197 1455 1186 1928 15198 2430 7341 2686 9761 13752 10005
1136 10513 3194 3179 15199 9639 7259 15200 4782 10222 15201 15202 15203 15204 3432 15205 15206 15207 3174 4769 15208 15209 862 4700 4783 3189 15210 3918 3048 3175 15211 15212 15213 15214 15215 15216 674 15217 883 2022 4312 4497 6732 684 15218 2966 15219 2813 783 2019 6675 94 11038 10403 6657 10261 711 762 669 6654 709 1682 786 15220 15221 15222 9798 15223 15224 15225 15226 15227 15228 15229 15230 15231 15232
1137 1563 1696 4268 2273 1939 1995 4137 1467 1870 1140 7695 1838 7458 918 4524 15233 7555 4072 1985 7619 1227 7552 5824 4399 2056 1832 1568 4882 1155 2320 11745 8175 12575 1151 2160 15185
1138 1398 4569 2609 1983 1130 1803 1070 894 1216 1422 1512 13401 1440 2134 5838 7803 4530 1432 1955 2143 1557 1652 1143 10591 8069 4465 1030 10660 4222 1036 9761 13051 3703 13405 4447 2141 2191 15234 4216 5126 13802 15235 6220 1927 12391 11739 3379 1404 14309 7012 4652 9022 1894 4459 4486 9690 15236 5090 12383 1837 15237 13081 4391 3136 2523 8359 11880 1132 1657 11560 15238 2463 15239 11900 7065 15240 14694 10145 5837 6582 781 6634 905 11493 15241 7108 1712 2131 6969 2147 13626 15242 9805 7925 4384 9734 6483 15243 15244 13060 1427 1032 15245 2550 10251 1490 1242 15246 7043 6412 15247 2172 2064 1614 15248 4876 15249 4346 6677 1119 6509 4358 13217 15250 7 11498 1045 13744 15113 4217 1413 7415 6692 1089 15251 1136 15252 9679 3732 9020 9665 1026 8354 15253 15254 11914 12930 4362 3287 7156 4208 13723 11509 15147 7485 1635 13750 5258 13402 11101 4431 15255 1103 3377 15256 7794 6682 3743 1035 3135 15257 7488 2405 5477 11901 6507 13762 15127 4106 9394 10142 1261 4073 1244 2350 10133 15258 15259 15260 11540 11521 15261 6699 7792 15262 8534 15263 2139 1963 6433 15264 9700 2365 15233 1097 11480 15265 1073 1263 15121 2239 1044 1079 10096 2295 5117 5253 8836 15266 15267 8032 7508 15268 13131 12697 15269 6497 7105 11098 2507 15270 15271 15272 15273 15274 1050 15275 6571 2206 1095 6513 2188 1524 9053 13906 15276 6 15277 10714 15278 7123 2540 5468 6184 2392 15279
1139 4199 4383 1176 4267 13053 2973 4140 8228 1645 4264 5777 5818 4117 7341 4613 1095
1140 4638 1090 1383 15280 2141 13120 891 1833 1391 2677 1441 1162 2380 6230 4342 1504 15281 10944 13377 1105 1084 4338 3833 780 4102 6972 11105 15282 4630 1255 10621 8195 1459 5202 1602 15283 1662 8779 904 8224 5639 9006 5469 4365 13007 1440 1647 4205 1887 7194 6491 14994 1401 4174 7987 1959 1473 6549 1214 5518 13880 1091 8954 2933 1218 1646 4734 4032 8201 1661 1104 6565 1329 15284 4622 4627 2093 1429 1111 1983 3294 2281 8252 3373 15149 4488 6415 4217 13470 6666 6687 11332 3134 1653 6569 4138 15285 15286 6215 4387 9757 5830 1240 15178 15287 10681 15288 1718 2941 710 4360 11042 673 11017 10782 10623 5468 1520 1896 8537 14308 4487 1130 6180 10128 12395 10946 3829 6107 9702 8803 1145 9738 1246 9417 2632 4160 6077 2972 894 1317 11979 6075 15289 11012 13209 11881 6113 1327 10779 1114 4445 13802 9627 1249 15290 9399 1396 4636 1465 15291 2702 4474 11549 3735 5602 5103 1904 5102 10627 1652 2592 15292
1141 4993 11706 3284 4905 3314 6721 3604 3483 725 7544 1540 1444 3323 3684 9244 5235 5799 5356 15293 10219 5016
1142 3705 1318 12009 1451 1438 3831 2974 1502 1837 5627 3726 13057 15294 3448 15295 6117 4130 7199 6071 10683 15296 1152 1387 1323 1604 6185 1330 11880 6090 4144 4186 11847 4451 7885 4372 4462 1317 15297 5253 15298 4880 1388 5515 7772 4433 1490 1241 4455 1031 1458 4876 5257 1455 4530 1109 4204 5097 1102 3268 4465 4114 4877 1946 1066 9631 1614 1145 12333 6220 6390 1423 1240 4351 1250 8923 11819 4444 1411 8200 1321 1149 927 1398 4377 7202 1828 2376 1663 1461 9057 5465 6606 1424 6575 1382 10092 2197 4450 13715 12750 4205 4388 6576 10251 12395 13119 914 4538 7495 4343 1473 7574 1245 15299 1498 15300 4869 5621 10629 14892 5610 7988 2028 15301 1489 15302 7488 12646 1845 13298 13734 1165 15303 6553 2344 11508 2166 5593 15304 6163 1037 10133 13745 1500 1517 7151 12855 2417 3542 8370 8558 1524 8356 10634 15305 4534 8772 1437 6211 1855 10945 6613 11505 7501 9818 9735 12348 2610 4257 9838 6408 6431 7490 15306 13831 4544 6233 15307 13051 4868 15308 6601 15309 15310 15311 6413 13933 15312 2461 1162 11525 4560 6075 10900 13871 15313 2324 15314 13313 15263 4461 15315 10248
1143 2708 5035 3072 2179 3760 81 1709 769 722 2748 710 5489 2785 1015 8303 852
1144 9447 15316 5775 1661 1189 9712 15317 8267 1810 6532 2830 4543 1130 8895 1216 3294 3684 918 8923 1981 4387 9896 1480 4388 2596 1979 2191 9444 15318 3340 9431 1103 2526 1256
1145 1391 1471 4137 1250 4464 9026 4106 1595 8964 7752 15319 9675 10588 8778 5471 7560 2506 8891 15320 2559 2482 15321 9456
1146 4200 2684 3739 1391 2584 5191 15322 1152 929 1848 1322 1187 1031 1102 1109 4076 7574 4364 7450 2686 4488 1145 9764 1487
1147 3542 5477 1943 13 1579 7298 9756 11237 9536 1190 15323 2422 6991 2548 4661 15324 1713 3367 2566 2009 9780
1148 1112 911 6175 3747 1059 1649 2125 918 1426 1478 1439 4296 8483 905 10731 1604 5833 4144 1451 4359 1329 4343 2974 1049 1659 1468 4361 2684 7199 6185 1483 9748 1398 1458 8272 3733 9768 4465 1176 4214 1460 1109 13762 10119 4685 14836 11744 10649 11747 1377 1459 4387 10229 6605 300 15325 1115 1249 904 4377 1487 8274 3380 11017 6103 7770 1840 11628 4410 1149 15326 5515 1502 4462 5951 4186 4876 15327 2039 4398 1378 1245 928 4184 1485 1137 4348 10591 15011 6234 10329 11338 4019 13293 1657 909 15328 10659 1113 5634 2609 15329 4425 8384 1324 15330 8721 13296 1257 1692 1435 12335 1501 15331 5545 6244 13288 2028 6220 7621 1153 3732 7450 4183 669 4422 11532 4180 15099 7067 7094 7198 4819 7353 15332 10660 1325 13306 12912 15268 15333 4404 15334 4335 1472 15335 1992 10949 7501 1263 15336 15337 15338 9822 15339 13734 1098 2461 4527 7559 13132 13747 12344 6492 15340 2543 2052 1968 4148 15341 11525 15342 13758 15015 4347 15343 8385 4338 15344 1090 8894 11477 15345 15346
1149 2025 6091 1134 10931 1056 1048 2357 5132 1409 2559 8205 7203 4356 8929 2125 1697 1988 4074 1217 4117 2556
1150 1553 1373 15010 1064 1105 4530 1566 10060 1422 1187 4477 1043 1567 1202 1651 1818 5600 1170 2916 1093 2160 15021 4354 4516 1568 7100 11557 7281 1192 7293 9687 5469 2282 7695 4164 11277 4149 2720 10898 8244 3269 4264 93 10271 1002 2206 1442 4229 3273 9666 12040 7159 1203 1622 15347 693 8778 1707 2320 868 7134 13450 89 2008 13843 6387 2372 7 13053 3287 7088 5645 2830 785 774 5131
1151 336 15348 15349 38 285 394 113 202 5549 5552 5922 5943 112 233 15350 58 33 422 14702 5930 5929 15351 4823 15352 4825 5970 130 240 314 271 154 4829 15353 15354 255 12432 5963 270 4830 15355 5915 4808 4886 5920 4814 15356 15357 266 9647 9916 5964 59 8028 15358 4832 62 4828 331 15359 10310 476 15360 15361 14706 121 8073 204 15362 12319 15363 199 10630 15364
1152 4725 457 171 15365 15366 12322 249 496 382 380 15367 97 15368 15369 248 466 430 15038 15370 15371 5916 15372 331 9604 444 2998 438 5928 232
1153 2748 3426 2179 2742 1628 769 714 2835 1030 4364 6972 4111 715 2014 821 7424 1543 721 3600 6918 650 2851 7057 1855 6529 2933 8816 11745
1154 4886 4884 4883 5550 9969 15373 323 12441 4750 12840 406 15374 240 15375 15376 238 15377 127 29 8071 8025 15378 15350 4830 4885 4823 15379 5930 14503 2983 14704 165 15380 13631 14702 4597 5975 5945 12321 2986 12423 15381 10630 6013 436 2993 472 15382 398 15383 5923 15384 209 9509 5914 9926 15385 15386 4591 15387 15388 223
1155 5264 3395 3402 8121 947 8118 3401 3394 3410 5439 4041 4044 7268 15389 5263 4062 4039 3389 8120 3099 10525 5450 4069 13393 936 4053 11371 10043 4674 1312 8125 4063 4983 4047 15390 8128
1156 11 6909 15391 15392 3603 3071 4993 9542 8984 15393 15394 14920 15395 12 5067 15396 6791 14990 15397 14855 4497 2732 13565 8308 6901 15398 15399 13002 783 12937 4964 8323 6953 15400 6148 12783 8331 15401 15402 15403 15404 15405 8583 4305 5491 15406 10607 5469 10598 15407 6017 15408 3284 14669 10219 12905 1005 15409 3083 12980 10752 15410 15411 15412 7435 13026 15413 15414 9569 9149 15415 15416
1157 5532 7084 2916 4138 1226 7306 4548 1243 11546 10622 1110 1189 1459 6208 1334 10647 1658 1104 5468 7821
1158 1934 3651 3618 729 3655 8283 3605 9368 3284 8325 12161 3253 11397 11403 8317 8278 8318 11694 5322 3613 7434 8324 3529 11803 5235 8645 9124 11409 8658 8012 6037 5666 3602 776 9558 3777 742 3680 3686 14568 14195 15417 8685 15418 7959 9173 8690 3627 8667 783 726 7245 5176 15051 3788 5020 8341 3817 13683 12896 7247 15419 14319 8313 15420 3592 6960 5040 3545 15421 3660 3517 9165 14166 15422 14925 10834 5717 14412 8651 15423 8951 15424 6937 15425 3791 2806 10236 11245 796 14213 3322 3074 2175 9283 10451 10569 3807 15426 1018 9563 8340 15427 8696 15428 14212 14346 15429 9557 4505 3245 13575 10331 15430 14342 4957 13446 13668 3603 4933 9586 15431 4938 3675 6834 15432 8689 6803 5876 10450 7246 14365 14866 15433 10420 9570 7815 9568 3590 15434 10456 14369 7162 4081 14222 14220 2809 9501 15435 13033 5384 13025 11636 10463 9988 789 15436 5048 7719 6758 13259 8654 3790 15437 6836 15438 8756 12331 6729 15439 15440 2897 15441 15442 15443 12330 15444 15445 14680 15446 15447 11814 15448 15449 11634 15450 15451 15452 3516 15453 14441 13032 5323 15454 15455 15456 9502 2835 10508 8342 6153 13688 15457 15458 15459 13036 6018 15460 3667 14570 2179 15461 13037 15462 6977 15463 14218 6257 15464 15465 15466 15467 15468 3490 12119 12782 15469 15470 3255 9585 2902 15471 15472 15473 15474 15475 13770 12885 15476 15477 15478 15479 8016 15053 15480 15481
1159 666 2825 7950 4731 6707 9980 2848 650 1001 15482 11383 7054 8313 2964 3063 668 739
1160 1722 11787 1733 10532 11891 958 626 1286 625 1359 10531 1363 15483 973 2673 967 632 15484
1161 4161 81 5350 3763 15485 87 722 3492 4246 11122 4589 7352 2635 999 868 9389 764 710 13189 2940 6384 16 769 5232 10080 5504 827 12 4656 4864 4580 2897 1532 4295 4316 6717 709 9983 665 6670 6883 3529 2020 2784 12886 1628 3480 1540 3678 1003 765 11649 6948
1162 7566 5776 1404 15486 1696 1984 1741 15487 15488 13837 15489 2608 15490 2115 5743 7467 8895 2163 1075 10783 11980 1702 2358 2295 2279 2219 9525 11919 13219 2678
1163 9197 5703 10539 1361 810 8445 1774 645 10701 11061 8403 3071 3699 2796 5353 7964 15491 15492 8318 15493 8412 14042
1164 3261 4139 1077 4074 2273 1965 1129 7751 2330 1176 2255 2051 1322 1112 12370 4128 12925 799 1189 3372 13740 1250 1230 2144 8748 11496
1165 2953 657 1718 2742 852 2748 1540 2179 12 1003 9543 2791 656 4312 774 2961 2936 2806 765 3168 4500
1166 6609 15494 13127 15097 5768 1812 15495 15496 6566 10969 15497 15498 15499 10790 15500 8223 10855 15501 2050 15502 10647 1450 1963 15503 922 9381 10141
1167 821 4241 783 669 1532 2709 92 655 9504 3131 715 6651 981 81 2806 795
1168 4800 1860 2927 2637 3518 845 2763 76 696 3640 1546 784 3765 811 2867 10385 4796 6043 3650 5018 4911 5038 3603 9987 787 2779 4976 15504 15505 3612 2896 3593 5001 5656 735 4937 3563 2928 16 10378 2851 13961 4511 6053 2821 3577 7435 3783 8437 9484 9253 9555 653 3085 3322 3245 768 15506 3493 2782 15507 15508 11056 3290 3568 743 4900 3284 2706 1018 1853 15509 821 4301 3074 6655 5380 8603 7239 6925 14336 8695 2855 11384 15510 6899 4502 15414 8690 4504 14340 10372 15511 860 15512 13442 14411 5673 9571 15513 15514 15515 10481 4500 15516 13372 12630 13282
1169 1400 1111 1837 1108 2320 1388 1713 1055 904 909 1458 4015 4455 4183 13814 1820 1246 7780 1494 13465
1170 1814 5733 1998 6259 7966 7566 8477 11985 9780 13935 14239 4320 1121 15517 8183 7403 14614 9430 2527 12397
1171 7966 8961 1889 2051 8869 1785 5453 8923 3430 5810 11839 2255 2303 1833 4197 2466
1172 9218 12889 7869 774 15518 5675 12159 6061 15519 5503 15520 15521 8624 15522 11047 15523 15 12886 2806 10808
1173 3290 1001 2785 5687 3518 7878 2017 652 4329 783 762 2812 1546 82 1628 4917 15524 3354 4557 3352
1174 1707 9121 666 4164 2766 656 7337 817 4294 653 2019 3280 1716 1445 7573 1005 5156 6119 826 1535 94 868 92 7422 2710 4241 683 1000
1175 15525 15526 4842 15527 15528 12650 15529 4885 115 12661 15530 270 14624 12655 259 4837 15531 15532 15533 12523 420 422 4883 15534 15535 9919 15536 236 15537 5369 12652 12657 15538 5558 12658 15539 15540 15541 15542 300 5981 4840 145 2988 4821 157 33 170
1176 2930 2751 7233 768 1002 1541 670 5869 1445 87 760 2773 7878 2851 4506 2798
1177 652 710 818 87 783 649 2968 2758 9 2787 1003 1716 1540 16 1684 11 771 12 1006 1004 93 1541 2735 4332 3483 711
1178 353 504 5974 38 5948 95 12424 15543 5549 203 334 202 112 19 110 5915 4837 5917 284 15544 318 39 5937 271 9968 13632 5972 236 5929 170 5922 46 15545 15546 2983 12458 243 240 15547 233 14706 307 5983 2975 398 4823 12432 200 15548 5934 15549 107 5973 15351 15353 15550 5924 5556 4827 5939 13107 15551 5955 266 103 474 15363 149 15552 304 262 223 394 2981 49 15553 5975 100 293 15554 5963 9590 366 4835
1179 6258 6026 3602 3515 12066 15555 15556 15557 5860 2859 8312 14948 14529 15558 15559 15560 15561 6960 13441 3312 6797 15562 10241 15563 12983 3651
1180 11902 13767 4551 10956 10955 11079 12012 2972 2036 4177 1155 4343 9005 12488 5121 893 15564 9001 1422 11415 12490 14481 15565 12483 15566 1189 5753 1066 12510 15567 12497 6393 12267 15568 6449 10090 10954 3050 15569 10356 1504 15570 15571 4517 13882 9521 2160 15572 10083 15573 15574 8252 4552 15575 14628 12492 12489 6168 2317 15576 1917 10743 10365 15577 3839 15578 12478 9847 15579 6424 15580 10251 10068 15581 15582 13853 14634 15583 4100 10934 2081 15584 15585 11745 4457 1887 15586 15587 15588 15589 15590 10124 15591 4364 1904 1656 11507 15592 1330 12008
1181 5367 15593 14704 10630 4883 5550 4826 15594 15039 15525 15534 15595 48 15596 14841 10222 4770 3179 15597 15598 15599 9639 4007 15600 15601 12322 8073 257 355 4795 665 7545 4316 2014
1182 4 1056 15602 1979 3244 10080 2753 5153 4995 15603 2713 659 2701 2683 5465 9716 1103 2688 1157 93 1541 2737 2012 660 661 2687 15604 5149 776 697 3300 5273 15605 15606 15607 81 3777 3167 3647 773 4422 781 7108 1256 9789 7107 15608 685 4963 786 5002 15609 15610 15611 5380 15612 1271 3186 15613 15614 7532 553 7321 15615 835 15616 3861 15617 15618 15619
1183 1143 2972 4203 1598 7199 11881 2345 6554 2933 4369 4734 13120 11524 1089 11753 2044 5833 1482 6072 10944 3821 5752 8964 1174 15620 5193 6553 4021 1661 10946 1591 5539 5468 1175 1552 8244 7911 1556 7903 659 15621 1053 2246 4327 7486 15622 1385 901 8560 5569 1799 1044 7038 7937 1114 2050 9740 7121
1184 11561 15623 9097 1510 1646 6260 1031 11754 3335 13910 8885 11239 1610 9653 661 15624 4113 14229 5753
1185 4513 4032 7274 1441 1111 1143 768 1141 2012 2020 13876 15625 4365 15097 12395 6075 7986 6415 6249 6209 7699 1904 2835 6381 2102 4483 15626 5571 6393 15627 15628 9380 1329 6413 13745 15629
1186 10350 4619 1156 1391 7295 12028 10087 4628 6580 4198 4205 1441 1053 4318 1837 1663 1378 1430 1474 1647 4141 4145 13879 1240
1187 1541 2179 652 2781 2927 4705 2759 1532 710 4862 2902 1546 2797 73 2012 2793 2964 7545 3245 2014 2761 3130 783 2706
1188 844 1684 657 3482 710 4711 4330 1108 3508 7895 11245 2897 704 10074 6652 2941 3422 3277 868 3489 6203 3429 7425 652 5004 2175 3251 2909
1189 1645 1134 1073 1126 1057 1040 1104 1420 1060 1327 1157 1451 660 1054 1106 2686 5218 2127 1102 1336
1190 1001 1541 1937 657 3763 2902 2012 3647 3651 762 5395 2801 5020 8626 783 13035 773 3784
1191 1136 799 1073 1382 1378 1149 4327 4358 4404 4471 4108 1145 1624 1242 1404 1321 1322 1440 4476 1077 1397 1438 1837
1192 669 649 4094 2643 2738 648 5329 2741 15630 4995 4511 2729 1003 2965 2762 4332
1193 11104 7304 5872 8704 15631 11288 10709 9712 1904 6841 11614 15632 12494 9872 3747 1170 15633 5620 15634 15635 7909 15169 4035 15636 1580 4607 15637 75 3710 15638 15639 1387 13814
1194 69 665 3480 674 5870 87 696 669 92 4863 3422 4284 12 8636 5504 2012 1826
1195 7412 2742 657 2941 12 1443 1004 2720 654 1540 821 3495 3618 7424 4497 6122 82 813 2014 786
1196 1406 894 4158 9070 14995 1800 1143 1130 1109 4126 4633 10857 1057 6580 1045 4327 1588 11532 11505 7341 1250 1837 1378 1240 4435 6430 899 1524 1814 1635 1604 1259 1457 1438 3724 4388 1244 1108 1474 1526 8370 6551 11508 1165 1256 1264 6465 5227 1515 1855 1397 5 8195 8845 2686 1261 1104 4032 15338 4189 15640 6433 10132 11498 4339 6244 1487 928 6456 1973 7509 4144 13625 1383 4667 11596 6408 799 11101 1257 1073 6391 1053 2604 15641 2482 8205 1893 11510 1492 8252 6635 11886 9346 2365 12346 2196 8385 1956 1037 13288 4651 1134 6566 6431 6492 4879 6211 12717 1478 9818 7759 6490 4670 1066 13933 11540 1258 11501 1429 9883 1498 2362 15135 15642 6503 11547 1523 15643 6543 2075 2593 15644 12932 7501 1659 6500 6451 15645 1656 13744 6442 5527 1496 1518 1441 13304 15646 15647 15648 15315 8828 15649 11661 7500 9838 15650 15651 4517 905 4653 8831 7631 12881 1456 6097 1527 8376 4661 11660 8808 6515 7510 4449 12149 1189 10365 8717 13780 12328 11531 15652 15653 3709 10130 4663 15654 9822 12645 15655 15656 6508 15657 15658 15659 15660 15661 15662 11663 15663 8832 7629 15664 5363 15665 15263 15666 1460 15667 1421 15668 15669 12878 7199 15670 15671 15672 15673 15674 15675 13 15676 15312 7065 904 15677 9208 15064 15678 7197 10879 15270 15679 2028 1976 15680 13311 13471 13138 1386 1121 15681 15682 12593 13737 15683 15684 4654 3726 13313 4384 15685 1472 7570 6403 9026 4015 13318 15686 1030 4141 1039 15687 2916 7506 15688 918 7786 12147 7827 7627 6249
1197 3794 15689 15690 15691 15692 10998 15693 10841 5851 15694 9 15695 4237 15696 7873 6029 2759 3800 15697 15698 15699 7442 10387 7710 9117 15700 8550 8527 5269 15701 10443 15702 15703 10508 15523 15704 13033 15705 6043 4943 3811 10463 6123 15706 3812 15707 15708 14667 12988 9280
1198 1136 8268 4517 1114 4415 907 2683 8747 1557 4034 11846 15002 1253 10591 4450 3749 3138 1073 904 4473 1204 15709 7699 1455 10787 1244 10660 13724 1108 8709 5518 1493 1682 15710 4656 10663 2678 14968 13730 1482 4126 10250 1458 7487 1245 1498 1515 1200 12391 4388 13491 11498 6619 12993 14752 7490 9854 15711 15712 10666 9828 6405 13625 13744 1635 2603 8376 10900 13094 15313
1199 1882 9662 11877 1231 5783 1407 1030 4104 2036 11278 3359 2245 1871 2383 12305 4264 7447 13 4148 15713 7750 15714 892 3366 3382 1459 10669 3455 5747 6215 9719 3121 8908 2526
1200 1482 15715 2255 1216 4404 15716 5134 3141 2140 7069 1654 9725 1421 1451 14889 5768 1145 12409 15717 1389 8184 4234 13714 6237 7827 8271 15718 1465 4138 11908 1470 3722 10937 1138 7888 8227 4473 3371 12529 10591 1329 13294 1149 1848 13405 15719 6215 1696 1316 5644 15283 8845 1487 5487 11956 7177 3379 4339 5362
1201 6259 15720 7494 15721 13754 7200 7490 11520 1244 6214 15302 15722 1132 1426 3379 12328 7509 2621 1590 15723 15724
1202 394 4826 4592 1422 15725 61 7342 234 406 15361 4842 15726 4837 15034 15354 12437 15727 5922 5523 9599 13107 51 15728 15729 15730 12654 14711 4594 10929 475 2096 7915 1030 4120 9024 13 4416 13484 12520 4410 7035 1404 12709 11482 11488 14982 11901 5256 4433 12376 4213 7797 1493 2057 15731 1800 5601 12338 9813 3747 15732 1447 15733 3448 1122 15734 1097 7195 1473 15735 1983 1248 15736 15737 1258 5513 15738 4570 15739 1203 1462 7003 7024 1089 2278 10259 7469 15740 4401 10094 9062 4028 4432 13472 1329 15741 1072 1202 1059 3449 320 14886 1057 14308 13831 15742 13409 15743 6603 13295 1249 6687 4180 9028 6554 5102 1141 5005 10256 2459 1225 10634 15744 3732 4562 4572 12912 15745 2155 15746 14894 15747 6509 15748 13887 7073 1084 4530 6215 15749 2172
1203 318 12322 9968 436 5948 15750 171 19 15751 1031 5196 3275 1155 1913 5094 6262 2916 2686 174 5318 13 4529 4297
1204 5830 1480 1558 10634 8360 13301 1255 3294 1253 9459 4138 15752 4892 2189 4424 6182 2417 9835 5486 7759 1478
1205 1540 2904 8592 1717 826 737 769 69 2835 82 15753 1537 2737 709 2774 4863 3497 5489 1015 3422 2902 7425 2014 3240 2015 1544 773 3647
1206 2765 722 1001 669 4310 710 824 2709 13 6668 3495 1541 4162 783 785 15 2804 1003 2800 1025 15754 649 768 15755 17 794 1717 12
1207 15756 9411 15757 3209 15758 3202 15759 6021 15760 15761 5901 12240 15762 755 15763 2659 6589 5883 9048 11161 10149 746 2649 11128 5879 15764 3206 4067 7842 12230 10146 3447 7839 8570 2646 15765 14663 15766 11699 7855 3442 3436 749 11158 15767 11178 10576 6303 9043 11696 9991 4065 15768 15769 10152 12234 2648 11189 8522 13423 13633 11202 14605 7835 12245 8162 10148 15770 12533 9304 2655 3755 12231 7845 7851 9410 6368 6347 9406 12226 10182 8165 3207 15771 15772 12229 15773 15774 9996 12220 6331 6356 9035 12250 10889 15775 12228 15776 6284 10177 10151 15777 4066 6366 6348 12236 12812 15778 8568 15779 9997 15780 8103 15781 10154 15782 6335 15783 10155 14021 15784 15785 15786 5900 3836 7858 15787 15788 15789 15790 15791 12215 13622 15792
1208 655 3565 11648 5350 6715 11 88 685 6883 4995 763 3422 4711 2941 868 2638 2168 767 693
1209 9044 3215 9042 3212 3438 7855 5885 753 9411 10264 15793 15757 5899 9310 4685 9991
1210 4427 1559 1616 1165 5191 2345 6072 780 8810 6236 3285 3823 1156 898 3278 1941 909 15794 1056 1034 4999 2705 15795 1264 5398 15796 9153 14397 685
1211 11 649 1540 6138 1853 827 1716 813 1682 3760 3546 9622 1548 12 2012 2017 1143 2093
1212 3705 14243 1174 4021 7800 1662 1696 1109 10904 14716 4376 7077 11494 7889 1692 3729 4874 2095 10880 1820 5777 4336 10092 15576 10083 7176 8189 15797 4219 7394 11586 1145 11325 13231 11617 15259 7403 4410 4439 11979 4466 1254 1062 904 6443 5568 6095 10591 15099 14999 13481 5076 10689 7992 4450 8709 14311 15798 11561 8263 9869 1618 8721 15799 15800 7697 12581 1948 6495 10899 2246 15801 12399 5108 15747 15802 1581 1970 12383 11911 1429 15803 11479 888
1213 3456 3278 4457 909 1056 1838 10322 5118 14602 2195 4443 2072 1380 1715 1077 1509
1214 7240 4091 770 2904 7861 4925 6385 15804 7890 6756 3763 15805 10808 7870 3647 3669 2898 6895 15806 1941 11397
1215 5492 4164 6719 2929 5870 786 1716 2179 2851 981 824 769 2748 710 2784 12 2775 4301 649 4295 657 2014 2835 10586 1532 696 4310 1025 3600 2902 783 2721 6717 762 81 1005 3490 3245 7545 3259 4711
1216 670 1546 3356 2959 3430 2771 665 1853 11245 704 2782 2789 2813 15807 774 2867 2774 2941 2806 2942 6138 1537 2904 2866 3760 15808 1718 4589 4914 2953 2851 721 7979 3497 2737 7748 5906 11968 1540 2722 5489 4711 6278 7749 4495 2835 6673 6268 6269 3556 69 2897 3422 13769 6053 6198 13386 6144 653 4380 737 2808 7313 8 4330 710 2748 6119 89 5157 2714 12828 9624 806 3625
1217 8216 3296 1204 6997 8217 4217 6227 2246 1207 1425 6230 11279 6686 1105 7786 1050 1455 8921 15809 1133 8365 9223 1227 14668
1218 799 15810 4457 1384 1388 11546 10350 15572 6251 12298 4879 10362 1808 1143 12498 9332 1092 1156 1104 7486 6529 1924 7822 1111 6429 1330 14969 1250 1402 1992 15811 1321 6238 1130 1037 1481 1317 5110 7780 1461 10118 783 4144 2779 4313 1039 1549 1005 2835 4472 1071 1456 2933 1482 776 1136 1499 4207 15 1480 4534 15581 15812 928 6617 15813 773 1541 14482 1457 15814 768 15588 4667 9751 10643 11519 10090 924 1240 7631 1378 10132
1219 2742 810 1533 2643 1540 81 1628 3355 15815 15816 15817 15818 15819 15820 3148 15821 7361 768 12786
1220 12142 8760 5752 8248 2410 6701 6636 5477 4076 4707 1332 15822 2141 15823 5617 5585 15824 1250 5197 8865 2324 12122 1442 15825 2612 11586 7925 6112 4643 1898 15826 8759 5583 1896
1221 2785 696 1000 827 1716 2720 1549 6671 2710 1024 3539 981 2964 769 1019 772 11 1003 8077 12 4862 648
1222 10168 5896 664 8165 15827 636 2658 13630 5886 11148 11340 14144 3206 11698 9301 11184 8514 9356 3302 15828 9412 12238 5888 15829 11771 5403 5894 13641 12531 3436 13633 15830 5877 15766 744 6336 3443 10175 15831 15772 15832 15833
1223 10250 6291 10686 8264 3138 7492 5517 5116 7759 9674 7047 2163 1069 1036 3050 781 6247 7038 2050 7571 4323 2108 15834 8849 15835
1224 10605 2737 10489 2744 2815 5002 2877 2851 4511 1541 2930 710 650 4500 2781 2014 2715 852 4711 6902 3490 2775 3045 1629 5380 4796
1225 9018 1044 5538 893 3273 4631 12701 15836 1622 2026 13716 1052 7822 8921 7496 9676 2050 11753 2680 10941 4613 5567 13806 1034 1630
1226 12002 2666 5788 8953 10968 8908 3218 1910 15837 2192 7554 7273 3340 7969 3077 69 2866 1373 13 7399 11354 4555 7294 9449 12854 15838 8962 11719 9427 15013 2389 13922 14743 1638 15839 15840 9445 14796 3346 9437 15841 15842 9453 4868 11350 9227 8956 2379 4396 1702
1227 1503 4193 4234 5579 1427 1084 1993 15843 1659 4394 1490 15844 3272 12374 12712 4608 2618 4888 1166 1048 1459 10746 4867 7914 5565 3363 1813 14302 5532 2082
1228 1064 1052 9095 5193 5203 1044 1567 1076 4516 1615 7908 1109 781 3266 1202 1715 4441 7450 1036 2050 1509 1078 2678 1069 6 1257 1256
1229 835 608 1271 13003 2023 2806 15845 15846 15847 15848 10010 4687 6637 7532 10039 836
1230 13974 1724 1767 14491 1343 13992 1772 1753 1777 1746 1776 5403 1361 1774 1346 1360 9618 960 625 640 11888 632 1783 1782 1279 5404 1743 15849 1796 14486 1728 15850 1281 3103 14048 15851 11776 11933 1727 15852 633 7682 10547 12797 14500 14501 13971 10777 14062 15853 10724 628 12822 1364 958 15854 14548 15855 7732 14061 1309 1356 1302 14492 1739 1287 1749 1953 7786 9760 11106 2972 11781 15856 1280 14011 15857 15858 10986 15859 3189 11787 1306 3330 10344 1339 11794 15860 1775 13493 4795 15861 15862 10343 10698 15863 1349 7371 15864 646 1273 15865 835 1271 834 5310 576 10028 1288 4843 1742 609 2921 586 3125 11785 631 1745 15866 1304 11928 15867 14046 14024 9403 15868 13996 15869 14042 1786 14114 1763 15870 8506 12724 15871 5429 14127 15872 14118 11930 3126 5432 14049 15873 15874 10723 15875 15876 15877 15878 14059 7668 1372 1340 5407 11793 15879 2703 14257 1751 14030 15880 14068 1794 13373 14091 758 15881 14021 13153 11297 15882 15883 15884 14016 14130 15885 14089 15886 5445 5411 15887 15888 15889 15890 14084 1750 14082 7729 14147 14150 11800 14556 10530
1231 11704 2720 654 5050 8149 696 846 4508 10613 8640 8636 12821 8634 3317 4865 15891 5283 8688 5844 7247 3645 9176 5036 10603 6753 10403 7828 2784 15892 5244 11286 650 6912 15893 7952 8291 5286 6905 3650 8661 5061 6759 15894
1232 15183 8900 3372 12356 7751 1905 4157 1854 7548 1639 7975 7699 6681 7827 4527 4197 2120 902 4137 1156 10623 1980 2224 13734 13301 1814 1656 1524 3450 2632 15895 2370 2079 929 2670 9456 1439
1233 10020 4853 601 10908 10016 3472 5160 3090 7529 3471 1274 9936 15896 1276 9933 609
1234 4519 4453 5535 3753 9712 1334 1170 3286 1459 1099 15897 3712 15898 9855 1956 1478 5195 15282 1556 1104 1055 7159 8242 8762 897 1696 6381 2225 15326 905 8194 11747 4484 15899 1493 8795 1896 6408 8205
1235 1439 7176 5465 4102 1332 7047 1042 8959 8963 8778 4474 15326 9818 11647 8845 5480 7128 6701 7025 10319 8776 15900 10133 2000
1236 1782 959 11776 15901 15902 14041 14096 1682 15903 14056 15904 15905 15906 14047 15907 628 3096 7757 15888 15908 15909 11933 1309 15910 12741 15911 15912 7693 15913 1826 632 5407 1351 11928 14065 5404 12794 14054 14021 11800 3330 13992 11795 14017 13965 15914 5434 1742 15915 13971 15916 15917 14451 960 7729 15918 14492 15919 14449 15920 15866 15921 15922 15923
1237 7751 1108 1831 1054 1084 4126 1109 1090 6 13290 11758 1174 1181 2702 7038 2584 904 4267 1398 1378 8201 1066 3287 1112 929 1189 6428 6605 1075 9020 1176 1624 660 4348 10941 1502 4653 1102 1239 4406 918 1142 1253 1838 1497 11017 2222
1238 2662 1051 1176 2162 13794 8909 4538 13922 6267 4035 8201 1604 1077 11231 7512 15924 1701 9026 15925 11503 13094 13857 13759 15926 15927 7635 15928 15929
1239 763 10942 2718 1546 1024 8531 824 9389 69 2965 2737 3422 10063 2638 9474 2866 817 15930 2769 15931 772 7979 2643 2847 2787 669 6895 721 715 2895 10071 2791 91 689 657 3168 2781 652 9543 2805 2806 15932 14841 3179 4094 1003 4711 2706
1240 6214 4219 4128 3820 1840 9706 6246 9749 1325 1224 6069 1661 1253 7485 4202 8224 10683 4144 4472 5599 4372 4218 1320 1326 8200 803 2973 5641 4517 5542 8268 4463 1837 1162 14244 1327 5535 1440 7195 10678 3373 8950 4157 5091 5833 15933 1050 2682 5465 15809 1156 15934 1324 4435 9835 8205 2050 4160 8267 4338 6182 6077 4410 5097 7394 8803 1591 4183 9795 13450 6391 15935 4432 4187 1438 15078 1045 1114 7699 4450 2222 1330 9471 3371 8271 1623 1470 1904 15936 1380 4335 1187 1240 1242 4388 9758 14969 9705 9424 11911 1257 12383 5362 5111 1329 1109 1457 3749 4337 15937 1432 12210 5202 5462 5471 1924 1518 11821 4387 7517 10092 8955 8274 9837 9774 4460 15938 928 1493 1245 7199 6666 5752 5567 1057 6922 15939 14968 2631 1136 1963 1597 909 1979 3747 7496 3358 3379 8717 15940 3275 2025 1037 1378 9735 7805 15941 15942 15943 3136 4527 15944 6412 4327 5536 4398 10949 4417 1318 1442 12337 1062 11008 1077 7074 4486 1646 2085 6168 10642 15079 6413 1038 7488 1145 6408 1108 1068 2822 7107 1598 8989 6478 5633 6606 1260 10632 14721 8959 12401 9737 14694 15945 3269 6576 15946 9796 13754 15741 1577 8189 4423 3261 4879 15947 5227 7036 13306 4188 4490 2523 9831
1241 3701 7424 5504 824 2014 5906 1548 1718 13320 4860 762 81 84 715 2902 786 15948
1242 1391 1143 1688 799 1139 15949 7298 1119 4145 1420 1104 4178 2320 1154 4533 1112 1518 4327 4881 5191 1109 1654 15950 8228 10246 15951 1803 1891 7195 6284 6591 12560 1253
1243 15952 3431 882 15953 3858 880 15954 15955 15956 15957 15958 15601 15959 3930 15960 15961 3158 15962 15963 15964 11468 13518 870 15965 876 15966 7377 15967 14868 14905 15968 13696 9074 15969 15970 15971 15972 3842 15973 15974 15975 14275 2695 15976 7359 3290 845 15977 15978 15979 877 15980 3164 3844 15981 15982 3355 10284 15983 15984 3160 15985 15986 2720 650 7233 13528 15987 15988 8018 2765 15989 3865 3846 15990 3998 15862 15991 15992 15993 15994 15995 15996 15997 15998 15999 15846 16000 3861 16001 16002 16003 16004 7379 16005 16006 16007 16008 16009 16010 16011 16012 16013 16014 7380 2694 16015 16016 11220 3901 16017 16018 16019 16020 760 16021 6765 16022 16023 16024 16025 16026 16027 3165 16028 16029 16030 16031 16032 16033 13089 3922 16034 16035 16036 16037 16038 3907 11446 16039 3913 16040 16041 16042 1746 12786 16043 16044 2690 16045 7374 4767 16046 16047 16048 16049 16050 4782 16051 3928 13087 16052 3918 16053 10223 16054 16055 3172 16056 11450 16057 16058 16059 16060 3852 16061 16062 16063 16064 16065
1244 16066 15973 10222 16067 16068 2693 16069 16070 16071 16072 3999 16073 3156 16074 16075 4794 14527 16076 16077 11321 16078 4775 16079 16001 16080 15957 3174 16081 16082 16083 4777 16084 16085 3859 16086 16087
1245 16088 869 16089 3922 16090 16091 16092 16093 3999 3930 863 16094 16095 16096 16097 16098 2689 16099 16100 16101 15207 16102 13521 7360 16103 880 16104 16105 16106 16107 871 16108
1246 16070 4775 16079 16109 4770 16110 15953 16111 863 16112 16113 16114 16115 10731 16116 16117 3432 4772 16118 16119 15955 16120 16121 16122 3999 16123 7369 871 15965 16124 6320 16125 16126 16127 862 16128 16129 866 16130 4768 4767 11449 16131 3886 13531 16132 16133 16134 16135 16136 2690 16137 16138 3965 3974 16139 16140
1247 8575 14641 3932 16141 16142 16143 16144 5033 16145 16146 16147 16148 16149 16150 9059 16151 15062
1248 2638 1551 2826 2815 10050 4247 3483 8232 694 852 2737 80 4111 654 9121 1445 6134 6972 1422 8206 3045 1539 7880 5869 93 2936 2867 11701 2782 2791 2783 2789 81 2778 2725 2824 4284 714 16152 9500 683 11290 4996 1541 16153 559 16154 773 662 4579 87 16155 7932 14566 785 2781 14354 16156 15140 15505 3244 2012 1682 2808 16157 3647 10114 2168 6628 3069 2751 16158 11968 5489 13673 15509 653 8752 14402 7435 8615 845 15515 760 12825 776 16159 4796 16160 7428 786 7884 8408 13035
1249 929 1134 1518 7287 2330 918 1939 4128 3722 1995 16161 1573 1253 1149 5731 4117 2593 2025 1176 1075 6666 1057 2916 4072 1090 3729 2037 4630 4270 1837 1465 4138
1250 4512 2036 4203 7561 888 11102 1833 2320 4137 1057 1068 8224 82 1102 799 1317 1129 1877 1240 2087 1077 5910 4893 4426 13812 8818 9761 11879 660 13463 13075 8540 5362 2686 16162 2117 12077 2192 6164 5473 1244 1242 8355 5465
1251 15987 4794 16163 16164 16165 16166 16167 16168 15952 16169 3154 16170 4772 3161 15821 16080 13522 15985 13434 11454 16171 10223
1252 3194 717 16172 9084 16173 16174 3196 16175 3189 16176 16177 14878 16178 10207 16179 3160 16180 16181 16182 16183 16092 16110 16184 16185 2689 3129 82 1532 709 11035 94 2753 16186 16187 16188 16189 16190 16191 16192 16193 16194 3940 16195 16196 16197 16198 16199 16200 16201 16202 4106 16203 16204 16205 722 2902 7434 16206 5060 1718 2964 16207 16208 16105 16209 16210 16211 16212 16213 16214
1253 13008 16215 4882 8821 13228 16216 6612 16217 15290 15179 11740 16218 16219 6107 16220 13209 16221 16222 1235 13377 11741 2380
1254 1628 9155 16223 13030 6954 7959 8667 9261 16224 9193 10471 7336 15450 16225 16226 9501 11804 16227
1255 788 2787 2798 737 17 771 3045 2753 1531 0 2012 4497 5147 8409 786 773 15 2706
1256 1002 2721 816 2709 2746 3584 814 669 7573 761 722 674 683 783 1533 1543 8551 1532 6252 1542 715 1551 649 4994 1718 813 688 845 2711 710 3498 87 90 13431 92 96 771 2817 1709 15080 1717 760 0 3083 3638 681 3127 765 5247 69 3069 3052 7422
1257 8025 19 5984 9645 4816 4836 8028 301 3029 4811 147 4818 5946 202 3011 12450 16228 2978 5975 16229 9915 4806 311 121 5981 111 4830 16230 153 31 5958 103 16231 353 16232 16233 171 401
1258 807 2179 4332 93 16234 9644 3906 16235 4772 3174 11700 15986 16236 16237 16238 16239 16240 16241 16242 16243
1259 2712 2768 4283 1598 821 1062 9468 1054 1404 9521 2179 4373 1001 710 2964 8194 2764 1540 3487 2012 650 4015 13625 1136 7699 1177 1240 7827 1250 8946 7802 2748 772 4094 10803 2743 4991 762 4657 2741 2643 2800 648 2925 4332 2787 16244 3490 1537 3422 1534 714 3483 4981 2909 2739 2724 16245 4339 16246 11520 1045 6492 12645 1474 2050 1130 1948
1260 69 657 2767 764 8232 2638 4325 2908 1540 656 3585 11 8172 2787 1003 81 2739 4314 665 2820 5504 6271 2798 710 3045 12 1626 9 10586 762 771 1628 2757 8077 1716 17 2823 4996 774 8287
1261 13543 9113 16247 10429 2906 8334 16248 10410 16249 16250 12943 9261 3647 10495 16251 3653 7594 11437 16252 7706 16253
1262 6303 5029 2648 4069 3206 12230 6332 5883 11161 744 6316 752 4718 8523 2646 9991 13640 6305 10148 16254 9038 5899 12252 7844
1263 16255 16101 16256 16257 16258 16259 16260 16114 16261 16262 16263 16264 11454 16265 16266 16267 16268 16269 16270 16271 16272 16273 16274 16275 15999
1264 2911 1143 4879 1138 1646 1109 4403 6091 1074 1427 1134 4361 4404 2916 4193 781 4351 1040 1451 1253 5518 1487 4450 9751 7420
1265 5576 762 1541 7702 13729 3730 4237 701 4271 722 3244 16276 4915 7440 92 7485 5763 8869 5190 13728 2093 11940 7211 1983 4280 3083 3562 3616 9104 3667 10806 2897 703 669 5351 2786 3134 11939 13219 16277 6443 1221 12383 7699 2820 4996 7982 10369 7137 3651 2014 4087 670 663 2784 3480 764 769 763 2748
1266 1839 5219 5763 2153 1972 2038 4549 1892 1057 3234 1077 2297 9414 1846 2151 10769 5810 4186
1267 3431 3432 16278 12784 16279 16115 16280 16281 16282 3908 16060 16179 16001 16283 879 16284 16194 16285 16286 717 16287 16288 16289 16290 16291 16292 16293 7372 16113 16294 16295 16296 16297 16183 11449 16255 16298 16299 16300 16301 16302 16303 16076 16059 7381 16304 16110 16305 16306 15973 16307 16308 16309 16021 16310 16311 14527 16312 16313 15958 16314 11446 3893 16315 16316 16317 3969 16318 16319 3193 16320 16321 16322 16323 16324 16325 16326 9642 7365 16234 16079 16327 16328 16329 5330 16330 16331 16332 16333 16334 16335 7382 11454 16336 16337 16338 16339 3968 16340 16341 16342 3934 16105 16343 16344 16345 16346 16347 16348 16349 15818 16350 16351 10224 16352 16353 16354 16355 16356 7363 16017 15998 16357
1268 3075 3503 710 3525 9507 6135 4915 3608 3626 4310 3759 5658 4994 2883 4086 10077 3356 7446 5499 3763 1685 5510 11554 2719 12311 10811 655 6126
1269 3280 710 737 3480 3495 8 3701 768 743 10696 3429 709 826 87 721 2842 10890 786 773 2947 2020 6651 7597 6652 3600 1543 649 4314 16358 5024 668 15112 16359 1540 7613 16360 7055 8610 16361 3426 16244 12982 699 5247 715 5063 5236 8012 1542 16362 657 979 2022 3253 10431 1718 88 3281 16363 9335 674 2019 1717 16364 16365 16366 90 16367
1270 1696 1804 1737 2273 1404 1048 1846 3287 2320 2154 920 1097 5745 9629 2667 1689 11080 1213 4339 1058 5577 4178 7394 7287 5733 5788 1910 11278 2559 4537 13922 8947 4465 4135 780 5808 1045 1245 1798 4168 2596 1050 4129 1802 12948 1102 4015 14737 1864 5637 1733 10539 10547 6689 3342 8185 1923 1953 14719 7975 1803 12472 10759 503 345 9719 8558 16368 1553 9447 1905 1095 2056 11592 1576 2208 2006 9445 2255 2389 1887 2385 930 9461 5514 16369 2372 16370 1706 8956 799 1949 1854 4328 1135 5134 1648 10637 1812 4488 9390 1946 11350 1831 8267 1982 13936 1257 15010 16371 1816 2445 2529 2705 918 6534 11976 2198 16372 4152 3490 771 1317 9800 7190 1656 16373 87 811 16374 14760 15643 14733 2257 9789 16375 2284 7560 3357 2127 1066 13759 738 11652 12859 16376 2637 12899 16377 16378 4991 4197 8693 1541 1496 9893 790 8433 7262 8649 3245 9578 10470 14406 2781 5395 6765 5869 14755 16379 13372 16380 8752 4388 16381 1533 6928 8799 9986 5023 2801 15804 8278 12017
1271 11319 761 16382 827 999 3590 10114 2818 10708 1006 1716 1005 16383 2902 763 2784 2014 1025 1018 773 4980 3510
1272 3645 1716 700 2638 8548 4237 2766 8 685 674 826 2017 771 16384 2904 16385 16386 1775 1742 1306 14522 14073 5418 11290
1273 2851 4657 3518 652 4500 2953 2012 1541 1826 2643 5018 710 2739 3045 852 2179 2927 2823 3647 2781 2942 2779 773 648 772 3426 769 9566 3684 4506 721 8409
1274 8184 4129 8927 1687 5255 9689 1713 1887 1095 5757 16387 1838 4425 2509 1121 929 1851 1905 2026 7751 2320 1848 1808 2160 16388 3237 1828 4475 11654 11644 16389 5006 10870 7943 16390 4427 10739 9666 1829 1689 2385 3294 1189 1139 4297 16391 12135 8923 6614 2568 1869 2422 9426 11330 7619 11333 4072 6681 2607 1143 1513 7277 1932 4491 3376 5595 2163 5603 2085 927 1688 2569 923 1102 16392 7485 6187 1509 659 1864 1478 1797 13861 1415 1598 1317 3372 9461 1559 1696 2199 14245 2662 1621 6241 1651 2314 6077 6259 1373 5480 10643 12337 6922 1104 7176 2632 10321 6433 2916 1053 2222 1240 11547 1406 6408 1384 1441 2367 11531 14752 1261 1315 12529
1275 807 783 12241 758 77 4590 2874 6142 2785 3302 1532 6252 11213 3442 16393 744 3205 749 2647 2651 8160 16394 7839 11696 6303 12288 12556 5881 16395 6380 6286 16396 9408 16397 16398 16399 5899 10181 6344 16400 13617 6348 6366 11161
1276 4311 4091 4863 3483 3572 3626 710 3525 90 7710 4111 981 8972 772 3603 2739 3129 3083 6271 4078 798 16401 7440 1546 5500
1277 1044 1254 5807 10327 893 1230 6702 16402 6167 1651 10 5539 7967 7267 4471 7904 1243 9210
1278 16403 16278 16404 878 16405 16302 16113 16406 7379 15601 7372 16061 11453 16407 16408 16076
1279 93 769 682 1443 3495 2736 2720 11 1547 764 810 654 824 5870 10865 826 8013 2638 655 4996
1280 8873 11 8 2794 12 2179 2941 2715 4337 1470 769 81 3596 2014 10890 4503 15 2775 3500 2784 2823 3245 2734 785 1538
1281 4376 10249 1451 1145 1104 914 2497 1321 2686 1330 904 1114 1384 8816 7967 1393 1245 1240 1383 1149 7341 3736 16409 16410 7084 5485 11956 6 16411 2705 8764 7353
1282 6948 1532 1024 1711 688 1937 9545 3356 2759 4909 653 1445 16412 8615 5870 5357 821 3526 8 3248 1000 5506 16413 4981 3638 16414 649 765 6671 701 96 2718 1716 2874 87 16415 3430 848 11 2820 1003 1019 760 3290 2819 1006 4316
1283 3343 4112 771 8171 11872 2465 16416 11972 1945 5791 4258 9227 12493 10716 3260 4322 4360 5771 1142 2341 16417 5582 5741 6383 2685 1901 5577 1058 1661 9780 2110 1863 16418 11252 14778 2466 1903 16419 1133 16420 12871 7302 5776 11235 8886 1803 9425 1706 8563 2292 8261 3702 16421 2941 4330 7613 1688 1240 9898 6164 1057 11874 2632 1255 9431 1923 4491 16422 2806 783 4233 4311 731 8901 12135 1050 9533 1084 2748 2635 721 3498 4657 11023 13922 5743 12856 16423 2687 2147 2127 769 4791 3640 5188 2149 8020 4541 8201 16424 15095 2699 7944 6291 16425 4102 15837 1696 1981 16426 14776 14809 16427 4555 16428 16429 13181 8558 16430 1904 6841 3265 1231 3346 11231 3371 16431 14611 12579 7939 4162 766 9283 2014 675 3625 14617 3248 2744 81 2120 10787 9457 16432 4540 11240 5473 14718 1506 3375 16433 7151 1078 2441 1165 1635 8784 7759 13182 1898 2066 4296 2044 2704 5463 2669 11879 2036 1978 5807 16434 16435 7012 12397 10901 7254 16436 2232 2917 16437 3294 16438 8562 3383 2599 3376 2791 774 2938 2737 2902 7150 1982
1284 2328 10623 4622 3839 16439 6613 16440 16441 16442 6443 16443 9435 11980 1696 7395 14731 11596 16444 4440 11719
1285 701 699 668 1933 1937 9217 16445 2184 4282 3567 5666 5056 847 11052 5049 742 8283 5069 4929 5678 7422 3637 5676 5683 7452 726 844 91 2889 5189 16446 7874 3579 4915 16447 3506 2831 16448 2886 7878 804 79 2845 4863
1286 6484 6399 16449 10857 12512 6432 8239 6440 13213 9004 6409 4392 6394 9006 10363 13767 6453 16450 10359 9009 6491 6414 10365 10360 16451 8224 8964 10659 8709 16452 5125 10083 13765 5572 10356 10959 10349 6942 4390 8251 14456 10350 12008 9000 16453 12508 7539 15571 2617 6395 16454 16455 8998 16456 4387 6396 16457 6468 16458 16459 6454 11978 16460 1039 16461 14993 12270 6417 3231 11958 16462 16463 16464
1287 2926 1532 3070 8925 715 730 710 4994 2765 69 12886 2179 2718 16465 8158 2019 676 15 1025 3760 868 7337 7984 785 3492 773
1288 1143 1109 7797 4638 3825 4181 3830 3821 929 1478 4538 6434 6443 9469 6557 1509 10350 8803 16466 6391 5473 3379 8477 2109 13112 16467 10134 12878 1404 1264
1289 4373 1056 5076 1170 3742 1239 5453 2916 1622 6084 4544 4490 7298 4144 3823 12279 1967 12278 1979 1147 6982 8247 5577 1245 7038 5487 7570 4335
1290 3555 762 4949 2874 860 4501 3556 3594 4927 3509 16468 5069 2844 716 3593 4092 657 852 88 3649 710 2179 10612 6708 5235 3563 9144 2886
1291 14869 673 2807 2714 4981 6732 4329 2942 738 1717 3423 2799 2179 2813 1540 4094 3487 77 649 4313 1003 3426 5247 715 4705 15808 9474 2765 2767 3422 1716 2768 2638 4325 6159 9545 3870 16469 3999 16470 4796 6053 5692 3313 4963 5001 12 7833 657 774
1292 16471 16472 16473 16474 16475 3857 16476 3896 16477 3197 3864 16478 16479 3891 16480 16481 3876 3179 16482 16483 16484 16485 13188 3888 16486 16487 16488 4777 16489 16490 16491 16492 16493 16494 16495 16496 16497 1007 16498 16499 9080 3875 3175 16500 13923 16501 6324 15980 3189 16502 16503 3860 16504 3879 3432 16505 16506 3849 3865 3850 16507 16508 4557 16509 3844 16510 16511 16512 16513 15204 16001 16514 16515 16516 16517 3968 16518 16519 16520 16521 16522 7372 16523 8702
1293 878 16524 16525 3189 3902 16117 16012 3997 3170 16526 11449 16527 7373 16528 16529 13188 16530 3876 7327 16531 4782 3846 5334 16532 16491 16533 13531 16534 3880 3183 16535 16536 16537 16538 16539 16297 16540 862 16541 3980 16542 16543 16072 16484 14275 3973 16128 16544 3858 7374 16545 11320 14877 16546 16547 15209 3886 16548 717 16549 9084 16550 15980 16551 16472 4768 16514 9080 16552 16553 16554 16555 16556 4783 16557 16558 16559 16560 16561 4766 16562 16563 16289 16564 16565 16566 16125 16567 3961 16319 16305 16299 16260 16568 16569 16570 16571 14489 15217 16572 16138 16573 16574 16575 9639 16576 16577 16578
1294 9070 9322 9329 9870 4619 6475 10087 1001 4656 11 1532 13374 1512 3830 8887 6982 5560 8151 13941 14995 7208 14716 1448 12273 15811 16579 11884 6391 3833 15129 13892 903 14461 6550 1253 7151 15136 3379 4634 2106 8649 3259 9688 16580 1039 16581 6617 6504 16582 1050 10775 16583 16584 2229 2699 6214 9346 11886 10857 12878 11510 12855 3727 16585 1187 13744 8855 16586
1295 1541 845 1000 710 738 1549 4585 1537 2787 762 3495 90 1006 1626 5870 12 670 1024 2815 1716 852 2902 13439 2944 2759 8399 2760 1003
1296 1189 2584 4137 1590 5742 929 1835 1837 12115 1928 6434 1243 10941 10304 5817 5517 1197 4117 11324 1121 4134 1846 1924 1155 1143 1596 1031 3715 4319 16587
1297 3387 5262 8507 949 4048 4041 4056 4055 11368 3412 3407 5263 942 4053 8118 3411 4054 2 8121 3401
1298 1737 1848 5813 1210 5140 1085 1924 1418 1044 5808 3715 4114 9349 2096 1125 1471 5826 3347 7804 2259 1928 4264 16588 5600 4127 9676 1228 1894 1109 1804 929 5620 2093 10873 2559 1198 1059 13119 1459 7618 8184 1378 2212 7558 13713 1253 7803 1485 1216 1891 1436 7615 1201 2036 4131 1051 1185 4443 660 7156 4396 2428 1077 1182 1178 5820 5603 7617 1095 7575 1119 1927 10787 5548 1225 11365 4299 1066 2466 1482 1810 4142 5196 16589 1181 16590 1193 16591 9317 4074 5101 9788 16592 6939 2064 1039 1513 13412 11480 10643 9904 5592 1255 9668
1299 16593 16594 16357 862 4768 15976 16056 3145 4775 16595 4777 16596 4704 11454 16336 16597 16598 16599 16105 16600 16601
1300 4910 3529 4280 2963 1940 703 3567 4711 729 867 6765 2845 8588 8454 3511 11378 3545 3695 3614 743 3630 3605 2801 3597 690 10998 5868 12007 3592 3550 3615 3773 3590 6037 4932 3628 16602 3305
1301 3418 16603 6672 860 676 3758 11 649 14522 14 715 7664 769 762 5232 3279
1302 827 3500 2708 3589 4927 3055 2770 703 8972 8755 783 2826 3628 8577 16604 6036 8293 7433 4303 7959 2868 1018 15506 8342 5235 4897 3800 3623 16605 1860 2754 7247 1934 3605 3584 13591 10331 8951 8685 3306 2859 8153 9203 15433 6063 6015 5063 9 9173 5023 8750 8336 3259 3602 3539 12825 8624 7245 5175 8656 2769 16606 16607 3074 6861 8751 8435 16608 3647 14214 8679 13668 9564 5054 3777 16609 8586 16610 8278 16611 4999 16612 16613 10599 3245 16614 796 13277 10191 4503 2023 846 5173 2175 16615 16616 16617 16618 16619 14424 15473 16620 6753 16621 6148 12015 13282 5024 13039 16622 4933 14328 9574 16623 16624 14391 9557 16625 13023 16626 9193 8579 10607 5395 16627 16628 6037 16629
1303 2749 6628 16 4994 765 1533 4111 1443 1717 2708 648 649 1000 1024 653 8615 845 1003 2643 5906 1540 650 1709 7233 3045 2785 6671 3626 3591
1304 13285 16110 16089 16314 16630 16631 3893 16003 3928 3996 16279 16034 16093 16632 16320 16633 16634 16635 16636 16637 15820 16405 16234 3934 15608 16638 16639 16640 16641 16642 876 16643 16644 16645 16646 3158 3316 16647 16648 16649 7386 16650 3161 14274 3968 16651 16652 16653 16236 16596 16654 16655 16656 16657 7384 16658 3842 16659 16660 16661 16662 16663 12784 16664 16665 16666 16667 7370 16668 16056 16669 16174
1305 16670 16671 16672 16673 4783 7370 15987 16674 16675 16676 15203 16677 16678 16679 16561 866 16078 4774 16680 7361 4778 15201 16059 16681 16109 15984 16682 15596 16683 3852 3897 15989 16684 16685 10222 16686 16687 16688 16481 13285 16533 16269 16689 16543 15598 16478 16551 16690 16291 3190 13530 16637 16012 4770 15599 16691 16498 16692 16693 16694 16695 16696 16525 7378 16094 15597 5070 4794 883 3173 16697 16698 16699 16700 16701 11322 4769 16702 16703 16704 16705 16706 16707 9636 16708 16709 16710 16711 16476 16712 16128 14874 880 16321 3972 9641 14878 3174 16713 16714 884 16715 13520 16716 16188 16717 11319 16718 16719 3879 16656 16720 16721 16722 13528 16723 10982 16724 16122 16725 3148 16345 3870 3194 15952 14524 16726 15206 4766 16477 4767 16357 4779 16488 16727 16728 882 16499 16490 15990 16729 16730 16731 3172 14489 16732 16733 16734 12785 16735 16736 16737 16738 16263 14841 14840 16739 16740 15200 3844 13516 16497 16486 3891 16741
1306 821 5906 8062 2737 2718 710 1532 669 2637 2019 1940 94 8392 69 760 783 6254 657 82 4497 1003 4590 843 4711 88 811 2787 93 769 2012 10366 12314 6119 3559 9224 2179 1528 7425 15 5271 2902 67 4162 2013 7877 4101 9251 4731 2014 6651 4511 4866
1307 10979 1641 1877 1255 4872 7751 2680 3294 1913 1646 1322 1125 1613 4400 1240 1395 2317 7463 4152 12867 9897 10646 2481 16742 7407 12149 15929 7752 16743 1831 6618
1308 6106 4454 1152 2973 7199 4433 3722 9208 1383 1490 799 4548 1448 1378 4114 1647 3268 7802 4484 2110 4534 3703 4425 1388 1441 3702 5536 4103 4544 4405 6209 16744 3749 4559 1254 6214 1455 1091 1391 1143 4234 4120 10626 4227 1153 1171 1149 14694 1797 1869 1477 1418 1373 4478 4876 4335 3425 1410 1122 1166 1119 6211 894 1422 5529 5256 1060 1436 1459 1401 904 15295 4375 12343 1460 1111 1121 13057 1053 6247 1599 4205 4386 1971 1253 4384 1458 1380 7633 4450 914 1327 1321 7 15118 4318 15675 1031 4132 1130
1309 8917 4144 710 1322 1145 9751 4412 1138 5469 11711 1240 1143 14590 11872 2480 1911 1624 6576 1089 1336 1715 7796 12581 10 7493 7620
1310 1853 4330 12811 15952 4777 16745 3856 3179 3355 7929 16746 16747 8182 2462 1066 4323 4217 1058 5515 1149 7052 3771
1311 4501 1682 653 1344 3121 3104 16748 1742 7674 15869 2673 16749 10796 0 786 7210
1312 6562 11078 12478 4532 4608 2680 4390 10060 2255 9001 8996 4606 12008 10955 4552 8734 4867 6205 15117 9384 9385 12485 9379 14480 7355 919 6484 4457 12490 8993 5610 1440 10349 16750 1109 1837 2632 4564 11079 14481 9377 4630 11902 16751 10090 16752 16753 12481 10070 10956 6249 15577 12503 4455 9208 16754 15568 15567 15810 16588 12010 4551 1250 14483 8995 10124 12500 10960 7822 1245 4405 1130 6410 2093 13767 1468 1493 4186 2972 1467 1152 16755 4158 1492 1487 10738 1137 16592 7199 1417 15295 1386 4465 1971 1111 16756 11829 2096 12583 4462 1322
1313 1939 1803 803 2341 1154 2193 2334 1965 2491 8885 1645 1837 8201 7973 11981 5757 13922 3453 3342 1556 8909 1969 1996 2259 7786 1145 7193 12519 13183 1434 781 8740 4603 2033 1633 11993 3423 4711 3218 4862 16661
1314 5970 14705 2991 15361 16757 326 457 243 1141 15378 8024 16758 10313 417 266 230 10312 16759 160 503 16760
1315 16313 3147 16682 13516 16269 15987 16339 15956 870 16761 874 16762 16763 13285 13531 16735 10222 16764 3858 16765 3972 4770 16766 15958 16694 16767 16768 16769 16770 16771 16188 16334 15600 16696 16674 16772 16291 3859 16773 16774 16775 13188 3863 16671 16776 16777 16778 16779 16780 882 16781 16782 16783 16784 3172 16785 880 16261 16681 16786 16017 16676 862 16787 15955 16678 16788 16789 16726 16790 883 16791 3173 3853 15598 16792 16793 16565 16794 16795 15815 16796 16797 3162 16538 16740 16798 9640 16263 16729 16799 14881 16800 2697 16307 15608 16801 3175 16802 16684 16803 16804 2690
1316 16639 16805 16687 16806 16807 3162 16808 16809 16810 16811 16325 3922 16812 16813 16814 870 16815 16816 9637 15987 16817 3865 16818 16819 15955 16820 3875 16316 4772 15984 16821 16822 16823 16824 3928 16825 16726 16826 16827 16828 16829 16830 16234 16831 15932 15974 871 16832 16833 16834 16835 16481 16836 16837 16838 16839 16840 16841 16114 16842 16843 16256 13087 10284 16844 2698 16049 16845 16846 7726 16847 16848 16849 16850 16851
1317 3503 1443 2766 652 822 1717 826 2770 8576 786 2022 13769 3604 9214 11934 16852
1318 3930 16853 16854 16525 15601 16855 10731 16856 16857 16784 3187 16858 16859 3157 16278 15974 16860 3893 16861 882 15994 16678 10282 16862 6325 16863 13530 14525 16864 16865 872 13517 16866 14275 3996 3999 16867 16868 16114 16869 16012 16870 16061 16871 16032 16872 16313 14527 16873 16874 16690 16875 16876 15958 16709 16877 16053 16694 16719 16557 16087 16723 10982 16878 16070 16879 8088 2694 15962 16880 16339 16800 16881 14514 16882 16883 16884 16885 16505 11468 15820 16307 16886 16078 16887 16888 16889 10281 16790 16890 3940 16576 16891 16892 16773 15596 16893 16811 16894 16895 16311 16896 16803 16086 16897 16898 16899 16900 16507 11453 16403 16901 16902 16808 3880 16903 16285 11460 13516 9640 11450 4788 16904 885 16905 16127 16534 16906 16907 16908 16113 16084 16128 7378 16269 16909 15984 7372 6324 14489 3947 16910 16776 862 15952 15973 16911 16912 16913 16914 3173 16026 883 16761 16915 15975 16916 16917 16531
1319 2886 7422 16918 2959 14393 699 12849 8325 8657 9266 8318 5488 786 3245 3537 4938 7352 3322 7247 16919 13443 5380 6385 1018 11409 4976 842 3690 3756 795 8651 4274 11650 8279 12619 5020 8327 16920 7239 11892 8336 14211 5024 9567 8645 8692 3568 5023 777 8679 5063 8658 6053 855
1320 13432 5676 13418 8548 1547 847 9370 91 2959 2951 2866 3489 814 1941 15022 7424 10847 7573 9474 2927 3497 2019 11044 4380 10812 10942 4293 3603 5037 16921 1003 6667 3591 704 3763 2017 813 11035 690 16922
1321 1053 1541 4981 1639 1953 3079 1546 4074 1638 2199 5471 1596 6576 7090 4135 2052 7339 1624 902 1891 1793 1812 1399 2682 1255
1322 1109 9440 11915 7260 16923 5228 1457 6308 1509 1386 14602 8189 8261 1598 10900 7942 8778 1256 16924 1970 10005 4661 4099 15275 6227 16925 3714
1323 2842 3553 10868 7947 3503 5345 2848 7431 3611 6905 6861 9244 3607 4304 9215 5673 4910 766
1324 894 1380 1134 1385 9223 7826 1471 1214 1071 5471 1460 7802 1456 2154 7902 7195 1661 1468 1240 6575
1325 5975 181 414 12447 4821 12424 16926 139 353 14897 16927 9595 199 12662 5998 5918 5555 9606 16928 16929 222 8025 276 15725 12471 4592 303 248 16930 16931 14904 274 10758 295 3001 403 10760 313 401 4836 16932 15034 286 314 114 12474 5554
1326 5554 4820 9593 19 16194 14869 181 3968 120 3174 16933 12784 11220 14705 123 4830 440 438 9924
1327 1251 1144 5539 1438 1441 12486 4357 4515 2916 1518 13 1322 4206 1594 13057 1459 1604 7196 1109 2036 1422 16934 7450 4073 6206 4875 7190 1031 14596 16935 3048
1328 16936 15063 16937 16938 16144 3985 1029 15199 16939 16149 3932 7332 16940 16941 16942 16562
1329 1156 1065 16943 1216 15013 16944 15721 11513 10756 16945 7456 2484 2008 1513 929 11361 16946 16947 3367 7466 16948 8736 2148 1702 2155 8178 6554 8562 14885 8720 1960 7067 16949 1448 2255 2442 1505 918 16950 1948
1330 3392 4056 943 1538 2768 714 2815 69 2904 1540 650 7052 2637 2787 649 4313 2781 1005 2902 5340 2772 12327 2798 1548 6658 2927 9545 7938
1331 16320 16951 16047 3164 16952 3189 16953 16954 16955 16956 16090 16957 16958 16846 16959 16557 16960 16961 16962 16337 16519 16963 16805 16964 16539 16099 16965 16291 16966 3853 16564 16967 16968 16017 11454 16823 7361 12785 15596 16969 16970 16971 3865 16908 3432 16972 3918 862 16973 6324 16974 16975 6320
1332 1934 2020 5063 2844 6049 3807 2863 3300 3777 3647 5038 693 783 8613 3651 3678 696 6895 5869 9139 14652 9104 2859 5357 2015 9244 7828 845 4866 3074 6053 8406 2861 2175 8625 737 8616 846 2803 5913 2759 1548 16976 3598 9191 8397 4933 8404 5666 2873 5020 773 16607 3684 9110 2902 15451 3309 1015 3493 3625 5491 8409 2804 8638 8659 9624 1941 8633 3676 9552 5068 776 8984 7440 4331 3645 8629 790 3245 6274 2964 16977 16978 3259 10236 6722 3483 5322 8645 8326 1529 2799 8321 5845 16979 5023 14167 16980 9558 7545 8665 3320 12638 650 9585 8693 4999
1333 649 3758 2785 764 13653 5905 999 6628 4164 1000 2720 1549 6152 765 2708 5242 6967 6121 15603 11 75 78 80 82 4586 845 3167 93 1826 786 2014 1682 4314 11006 3495 81 15 84 774 1001 773 9501 2804 810 2815 783 2706 5018 9989 2962 11894 2801 3245 87 707 10942
1334 3626 657 4587 8548 6668 3083 2825 2724 5869 2794 16981 4239 2753 775 684 3604 14948 5727 16982 5647 3062 5496
1335 657 6022 4111 1540 5504 8 4657 769 6717 710 5492 4166 737 3529 662 13783 2889 699 708 2784 87 2748 11384 5038 2943 5850 762 3512 1006 13 3426 2787 2014 81 8695 3647 786 3627 88 12 2964 852
1336 1125 1383 11333 1518 1043 899 1057 10327 6208 1510 1211 2684 4073 1409 1425 11899 3266 4404 9025 6684 2036 1089 1117 11856 6702 5533 1638 2071 2096 1398 1071 2192 2559 10639 7825 10229 16983 1939 1609 1604 5610 15844 7203 5091 1463 4115 6233 5364 6211 1439 4515 2135 9706 1441 6246 1145 2911 3287 1133 10325 1226 4408 10329 6688 3269 1251 1065 4193 1060 6069 1054 4114 4120 11440 1164 1109 4299 3451 1471 4364 1459 1121 929 11279 4202 1410 1455 1253 8189 1126 1111 4540 2108 3738 1056 1031 894 1130 4422 1971 10683 1983 1613 1129 1458 1320 2914 4390 1138 12357 5538 3702 2973 5542 1645 1592 9389 6687 1250 9721 1643 10653 6677 1482 1640 4376 10650 4521 7273 4144 1184 5525 1200 4399 1333 7450 5579 1535 1532 3423 84 2775 1152 3450 1426 1240 1431 927 1414 9660 15186 16984 4445 4335 1485 10248 8919 1034 11565 1805 2686 7198 1327 2961 1318 1115 4403 1378 1785 11689 4544 2484 2688 1249 1396 1377 1480 10778 2584 8469 9020 6535 7047 4450 6182 14968 2317 4391 16985 1245 16986 12277 10591 13712 2151 15797 1321 7908 1048 1150
1337 7415 1189 11556 2199 16987 6998 2099 1188 2916 1227 5517 11877 1197 6167 5576 803 1204 3273 3050 7455 7097 1206 12409 6986 4270 6306 1056 1646 13053 3449 16988 11899 16989 12929 12040 13064 13476 2093 16990 1119 1105 1828
1338 7750 2684 1143 4328 1240 14574 1617 8489 3294 7752 1989 4555 11492 2037 1114 1004 11 2800 14718 1257 12581 5465 3383 1624
1339 2910 3275 1804 3137 4443 2443 4323 14682 4418 5196 1087 1532 2721 2912 1044 4396 4710 3129 783 649 2753 790 6159 5906
1340 16823 882 16991 11454 16269 3152 15989 3166 16475 2693 16992 3918 16993 16726 16994 16995 16996 3856 16997 15816 16998 16999 15996 16515 8088 16524 17000 16735 16169 16263 16336 16079 17001 11449 16492 17002 16136 2694 17003 17004 16072 877 17005 3180 17006 17007 16484 17008 17009 17010 14514 17011 16102 16059 17012 4775 17013 17014 3858 16839
1341 3510 6628 2842 3626 8298 11382 8553 743 6745 2020 6652 668 4791 764 2638 3486 710 7445 7046 845 17015 2936 8302 3597 722 2835 8294 5657
1342 657 1548 2179 5504 2851 5492 2729 10730 3045 826 1025 2786 2902 2797 773 3760
1343 4811 199 12322 19 17016 482 406 5368 51 10312 414 239 4886 4736 9594 4806 17017 17018 17019 17020 2985 15547 520 545 9590 4817 224 3020 14520 17021 151 17022 17023 161 133 5936 5554 4821 4744 9515 103 17024 12428 17025 14708 15034 200 2989 216 292 4836
1344 4304 6119 4111 2737 3490 3625 2710 2835 819 3479 683 814 685 1001 3417 786 6715 75 3256 3496 10412 88 4796 667 12117 3167 4979 6198 4797 4978 17026 5665 13321 5692 7608 13770
1345 5930 9606 4597 436 12448 26 109 4816 12322 19 181 165 144 420 3029 12439 162 16232 2012 4886 4832 17027 17028 256 259 14696 17029 5987 17030 5366 62 269 17031 524 5992 322 17032 15750 5936 113 4827 17033 171 159 15530 3043 17034 138 496 12425 12449 116 9598 4836 4840 9968 15730 4841 5993 279 303 315 12463 3032 17035 5367 174 5988 17036 257 382 15543 17037 17038 510 17039 4821 345 425 313 12319 160 4813 12665 548 17040 17041 17042 5933 17043 5924 406 9595 9593 17044 9594 12455 232 17045 17046 169 17047 12320 439 164 5998 16928 16927 17048 14983 11619 17049 17050 5920 319
1346 4674 4673 601 586 616 7534 991 3089 839 831 4693 6064 12256 17051 13419 567 12091 12098 7530 5165 17052 1267 5164 7524 608 580 571 17053
1347 17054 4348 5538 1061 3266 4412 9223 1176 2026 1138 6164 1065 1149 1114 2684 893 1052
1348 5687 2959 90 4711 665 3638 15282 762 11979 3252 1542 81 17055 929 13790 826 2766 9089 9502 7231 9501 3259 7428 5020
1349 1645 1165 4104 1109 1239 1108 17056 1518 2162 1031 4158 904 1040 4270 5743 1126 5511 13794 660 1143 3218 2330 1112 4134 1960 3750 1848 2255 1231 1814 3265 4472 5642 12354 2056 13928 3260
1350 439 202 14509 5917 5940 335 298 8028 307 2983 103 15373 16231 353 107 167 39 9969 51 5948 4828 4806 237 10309 8024 4883 236 15351 12319 233 157 120 322 15553 5916 5935 504 114 255 9511 5915 12460 31 331 5920 199 17057 149 16928 5549 5553 5556 14703 17058 164 97 297 4814 17059 99 148 2979 407 394 12440 13107 300 304 4830 223 5914 110 240 4815 234 155 2976 323 9590 5550 61 17060 10310 17061 17062 112 4841 15546 15543 5932 420 5552 293 5921 4884 422 17063 15353 3020 15348 5931 215 386 284 12414 4805 17064 17065 194 153 156 17028 26 12322 35 122 4595 427 40 476 315 2993 17066 17067 12840 12418 17068 12464 17069 5922 86 17070 4725 17071 2986 12436
1351 10998 9368 867 5872 10374 11052 2020 7316 3605 7315 6254 10377 743 2937 3647 17072 4919 12633 3567 2905 10429 6827 708 3313 5319 3678 7652 11729 5229 17073 696 4307 786 15139 2868 5692 8639 5868 3793 5073 5062 3568 15891 2845 8626 7221 9191 3564 9496 3309 800 10236 15143 7245 8526 14202 8336 11288 8642
1352 4819 4597 326 4818 17074 4593 6013 5966 17075 3018 17076 262 5989 243 4813 17077 17078 3027 260 17079 15044 17080 17081 17082 17083 17084 17085 17086
1353 2736 11 769 3592 648 852 762 2014 2964 17087 4936 2803 4866 16 1018 2902
1354 1252 1430 4465 1393 7340 6185 15129 1137 7633 1474 1329 1164 7203 1251 12077 1126 1249 11918 6174 4107 1440 4460 1383 1330 1480 9813 1145 10248 1481 6176 4139 17088 1845 1324 15079 15941 1975 11087 1245
1355 1696 17089 3236 1831 2137 2487 3265 1651 8475 10058 4161 4034 6262 1661 1973 7201
1356 9929 7529 831 10276 7532 5294 12968 12974 10029 9930 12103 7321 4730 560 14363 10303
1357 6064 566 14513 4853 8457 9941 4857 598 2921 554 5287 567 836 586 10279 7533 560 8054 10011 575 993 568 1267 580 17090 12257 2919 9930 606 1679 12588 7321 10034 12089 10022 5163 3466 619 10906 2095 1031 5161 10016 841 2924 4706 614 9963 2765 4699 10010 7529 7527 3476 557 10035 17091 4680 10014 12206 8121 932 4063 4048 553 3394 8123 12963 602 3473 2920 13419 837 4683 17092 8463 7538 7997 1270 12175 17093 12185
1358 17094 17095 8700 2759 8171 3280 6933 6624 706 8 75 78 3128 16 10586 12 6271 10063 2638 2179 4996 3057
1359 17096 7329 17097 17098 17099 17100 16298 3355 17101 6149 17102 12788 14296 17103 17104 17105
1360 657 1548 84 2775 2851 5492 5504 2729 10730 721 3045 826 3284 10190 1445 88 2179 1005 2733 2014 4866 743 12 773 1025 3426 10395 7833 2820 8287 2801 2809
1361 8 11446 5333 3174 7424 82 3497 676 769 674 2957 721 10052 92 3760 2017 16 2964 9087 4493 710 771 1537 69 3131 4861 2716 3422 2763 855 4705 2768 2765 2742 774 10590 3754 77 2819 1716 4996 981 1025 2014 11 2806 12 1532 81 93 2723 6278 770 3245 783 2927 2889 1003 773 715 652 2815 2706 9224 3325 9577 9985 8752
1362 1214 5531 1913 909 14224 2664 2686 15000 4360 4370 5778 1034 1661 4179 10932 7802 899 1785 3716 2066 1696 12142 8347 7456 4186 1810 9626 12299 4539 10990 13292 2028 6180 4563
1363 835 7524 6064 3477 5161 17106 17107 578 14513 566 568 598 993 2921 567 574 10275 586 10279 607 575 558 601 590 580 560 4843 1267 7533 576 10008 10034 555 12089 12193 5163 619 585 8121 932 4048 3401 3394 1031 2924
1364 2491 1470 3333 14225 2044 2192 2160 9719 2605 1972 7284 2110 1091 3346 2281 5780 5629 7562 5816 2614 1413 1886 3738 1251 1979 8475 1805 11235 5743 2292 3342 5778 7909 1196 1887 7287 1199 8558 5619 4544 16419 1067 7804 7485 4019 11524 3230 2389 1057 5833 4337 8956 2376 8909 1576 1814 4555 799 11279 8271 4388 1663 1257 8270 2686 1861 1329 3129 2788 2725 8717 1441 1635 4881 5473 1431 1493 3703 2079 4427 17108 2705 8709 12337 15102 2410 1254 17109 17110 11979 6618 17111 7510 9761 11594 1069 1457 15796 6439 13754 1594 17112 17113 6515 5100 7627 8836 11712
1365 2750 8646 14850 17114 703 7828 3544 3323 798 5356 7949 10827 5861 5178 3317 4279 12118 3617 5001 3300 4500 5049 3064 3571 3651 3313 3633 5072 8284 7586 69 2640 2785 2941 2779 9241 774 2781 9162 2895 5685 8636 7956 9051 8553 6036 13769 11303 6768 4797 868 17115 5692 9161 8140 685 10697 800 776 2778 2791 2780 2869 6885 2804 15 2899 3678 3493 3620 7247 3632 5792 2886 10385 5017 669 6781 2786 3058 15604 6202 10377 6851 7722 8640 8390 6044 2872 17116 6896 7433 794 3065 14171 2815 12938 17117 785 13540 17118 5173 9540 855 6827 1852 3133 821 3507 3417 7138 2635 6950 8293 981 5271 6951 1853 8969 3650 3777 10802 11290 8634 1551 10613 2801 4941 17119 2756 5365 9139 10812 2706 7984 2793 2725 773 9240 10816 6913 17120 8291 6020 2863 6057 2803 5382 5147 2796 2896 9109 3811 10394 17121 17122 6038 7316 7595 6954 6959 3787 4933 17123 7953 9975 5502 9131 8683 2845 3584 2798 2751 17124 8304 4791 8626 7641 14217 8300 3490 3599 17125 14162 3634 2963 17126 11396 696 777 692 5666 5913 6739 1015 13386 2792 3484 2870 92 17127 3802 11898 6848 3309 9244 8299 4937
1366 4848 4852 10026 1272 835 10032 1265 17128 1266 10010 3089 553 10291 12111 17129 12171 10294 17130 17131 3467 17132 17133 17134 8045 8001 4674 17135 1275 8002
1367 76 1713 5451 671 1324 7903 1070 696 2877 1003 82 8589 760 653 5273 811 7261 3732 842
1368 719 3508 11803 17136 1937 5868 10374 3634 17137 17138 5014 17139 17140 2641 979 10469 2897 9115 3695 10818 12810 8755 6038 5188 10613 3628 10886 9142 9976 8395 3676 17141 10695 14321 700 4905 9206 7641 3594 13500 14334 17142 3323 9241 8403 11398 725 11043 7313 3670 3083 3555 4802 1707 8592 2869 3076 3250 10410 17143 8951 14347 5173 9153 96 1541 9575 17144 4978 17145 12905 14843 6926 17146 7956 3516 11288 17147 9158 15393 8018 4275 17148 17149 6268 14403 17150 13565
1369 813 2715 3167 666 9087 1548 1717 3535 2737 6120 96 4595 17151 9621 2734 2753 4598 10929 17152 15365 17153 4591 15725 230 17074 17154 17155 2808 2709 2774 17156 2942 6732 16608 2799 9783 17157 17 2783 2017 6657 6675 3541 1533 765 16157 762 715 10261 6628 496 17158 17159 17160 17161 17162 8431 12874 9608 14348 6653 4332 8038 17163
1370 9929 7318 4698 567 835 596 4674 2919 601 4689 577 12589 12257 566 555 603
1371 2800 783 852 6134 2801 1156 743 3510 3568 690 842 6385 1854 3651 1104 3600 786 710 2902 2886 6652 4305 1996 703 3628 3309 3549 3248 3245 821 981 11056 4933 8635 1018 3284 1017 14919 2748 9989
1372 1540 649 710 3426 4859 827 87 3430 743 5232 657 13010 5504 11 12 2012 2784 2014 7323 7608 773 3483 11650
1373 1887 4180 10774 4476 4633 1114 1509 1971 17164 15065 4473 1506 1104 2054 11716 1053 17165 2525 4555 17166 12752 11508 15796
1374 17167 14872 17168 17169 14473 17170 16496 3352 17171 17172 17173 17174 17100 8872 14873 3354 17175 9549
1375 6925 4939 852 8589 11378 4164 6061 6202 3574 2801 3284 6038 5271 8635 3065 3317 5001 768 3300 842 17176 5382 3783 4937 8705 4091 6899 3311 3309 3591
1376 9250 762 1541 78 10071 4935 17177 13769 683 17178 9401 845 5801 3546 3167 1540 4303 1826 852 1548 771 1538 4332 2902 11803 688 773 6057 2712 9501 8649 13019
1377 1386 1073 4640 15000 11489 9228 13255 6529 17179 5626 17180 1412 17181 17182 9469 17183
1378 2785 1541 2637 1546 2965 2726 724 91 1001 788 5059 2794 3760 653 5245 656 711 92 2908 817 87 2720 2814 769 1003 82 715
1379 1813 1871 1121 2110 2154 12763 1874 3346 4374 1471 1646 6547 13823 2206 2191 7619 13800 4529 1331 5209 2036 3338 2595 6096 1220
1380 4264 4477 1817 2498 17184 9655 13869 2416 906 17185 13759 2406 1838 6985 2587 1892 14469 12051 17186 17187 13310 2351 2052 2031
1381 668 11430 5173 5908 9191 8632 3292 17188 10378 2899 5051 17189 7872 981 3309 10432 3356 3075 3311 5680 5271 6119 3591 5020 4111 4504 17190 5361
1382 713 2814 1540 7981 1001 2718 714 670 6652 3489 0 2022 4497 722 6819 7932 676 769 5012 4791
1383 9719 4911 12077 2051 4328 5511 1923 1066 4157 2605 9423 4517 1212 5454 1982 2186 5788 4364 1892 10272 5522 1105
1384 1353 1762 960 12720 1736 5408 12735 3123 1723 17191 640 1306 17192 1351 1794 12728 1782 17193 13157 7734 13980 17194 14121 1781 8878 8445 17195 5409 10513 1360 1728 5430 625 11289 962 7732 17196 8890 17197 17198 17199 17200 17201 17202 5428 1792 3112 1788 10547 1767 10530
1385 2484 2077 7908 1846 4168 2231 8180 1055 5753 4880 7750 1838 9447 10317 1145 4447 4127 1053 1057 4614 778 9011 7395 4149 1066 1104 2189 4524 3704 7519 1612 10857 2509 6106 4707 1098 1837 3 9663 3823 1058 8923 5 3227 1615 1982 1795 10931 7752 3376 5757 17203 894 3346 6248 4527 9538 2188 1895 7101 7520 2118 1702 7070 7300 17204 11276 17205 17206 9707 17207 5804 17208 13899
1386 1051 2191 1121 1185 1471 1176 1031 918 2273 929 4556 5809 1838 1848 5805 2559 12211 1155 1050 1152 1053 2125 1044 2127 4117 2206 6093 4200 1102 1463 4032 1119 2259 2684 9226 7459 8748 11616 4450 11856 1459 4074 2154 5209 4540 4354 8563 8955 1423 1156 8359 913 11575
1387 5757 4451 4177 1043 2504 1075 1802 1932 1060 2160 1805 1391 2274 4168 1640 1045 6614 1604 7751 4027 4129 2222 1854 1837 1058 1145 1124 4263 1196 10672 1843 5803 2125 1721 8907 17209 7485 4135 1117 1638 1104 4160 10972 1033 4159 918 2972 4390 3275 1803 7903 3738 3260 1068 2559 4155 3218 12494 14723 920 8909 15843 1557 5630 4018 1207 4 929 1799 1969 1247 1875 1832 4200 1317 4476 1402 6211 2667 2162 5603 2310 1452 2443 4454 1975 3750 8923 5514 11877 1833 7786 1561 5191 659 1973 1089 1624 7341 5196 12383 3752 1473 4257 1053 2147 5595 1761 17210 1164 7047 4872 5781 6207 1106 2334 4484 9707 7902 1383 7339 5531 4126 17211 24 1460 1100 153 2410 1320 1133 11828 1057 8558 3457 5078 902 4360 1334 1255 2584 1137 6242 3724 1504 1828 12353 6187 12934 7907 1439 5 13794 9712 7254 1062 9747 4032 15662 2682 9209 5219 2487 1072 2245 4031 2051 7395 2124 1070 1102 7195 1111 3371 11753 4299 1946 9898 1661 1251 1556 8267 1484 5120 9431 1923 4618 4327 6306 15734 4158 1176 16423 6387 7944 5610 2037 7822 4270 8248 8952 6104 4193 1865 8563 335 1903 2614 17212 2687 436 1960 2700 7752 3267 2686 9002 15628 10773 7766 2056 2699 7250 12437 7197 6942 8201 1696 1882 17213 2005 1429 1257 17214 17215 9007 8238 930 7492 8557 3338 16220 1030 12356 1982 1553 3294 4548 1069 8265 1244 1128 1189 8261 1142 8355 8716 1830 12867 152 17216 1493 1039 12654 150 7562 7750 660 5468 11822 12581 4387 16430 11353 2120 1593 14611 1122 9314 11599 6922 4541 2055 9754 14776 1077 11584 1109 4296 2079 5528 1438 17217 7152 8953 1820 2445 1169 6576 6841 17218 4260 8214 17219 11614 8026 10635 1879 15193 17220 1617 5587 2052 10145 10718 549 62 17221 4398 3740 8806 2822 7759 5485 1904 1900 1898 1167 7019 1218 9720 7465 1413 7176 1240 4015 4205 1855 8784 8799 11017 5471 9788 17222 17223 496 2021 1970 1979 4388 1114 2227 7910 1038 17224 17225 4372 13887 14294 7570 5620 9026 6666 2163 5195 7128 5756 9800 1496 7013 17226 12751 2542 10934 1161 15147 9017 1232 2242 9671 11510 9054 17227 2508 10133 2043 17228 2593 15331 2126 5473 9016 7084 2301 15115 4258 8365 1222 7108 17229 8818 2330 9324 2663 2050 5487 2701 17230 4021 2196 2199 1948 4102 7159 9702 13389 2114 1646 1590 10118 7915 17231 2038 11617 7302 17232 268 4030 15528 17233 2916 15158 7119 1036 149 17234 10005 3741 2378 17235 2233 11860 5080 1135 1256 2072 7793 17236 6487 17237 8773 3729 13460 15733 17238 13760 17239 2172 6572 16585 1636 5563 9775 11674 14359 900 11682 17240 10900 1184 4570 9397 7006 10139 7820 17241 6995 5530 2602 17242 17243 6996 1635 17244 5569 1096 17245 17246 5478 13857 2543 13753 2350 1996 2427 8853 7460 2234
1388 1654 11601 8194 2410 7937 1663 12122 5 12761 6982 1585 1859 13130 17247 10974 8921 8375 9681 1039 11506 10358 7502 7490 4880 1127 11954 17248 17249 17250 4664 9551 17251 17252 17253 17254 10059 1527 12149 15650 6238 1474 17255 17256 900
1389 8521 6284 17257 9991 636 11724 17258 9031 2656 7841 17259 9030 11697 5886 17260 17261 15828 3214 6314 3206 5892 6287 5894 3444 14605 13633 15764 6335 6300 746 9294 17262 11164 12225 17263 17264 6019 17265 17266 3200 7839 13620 17267 17268 7849 17269
1390 6317 10119 10168 8572 17270 3212 624 17271 17272 4297 2334 3750 1089 2668 1321 2911 4125 1652 2511 1085 3832 1049 16421 904 4361 10787 4181 13928 8959 7210 3638 1445 813 4590 88 3427 880 17273 17274 16052 17275 17276 17277 11993 13 1109 13171 12304 11233 2941 12834 7573 17278 12870 9154 17279 17280 10394 1860 2804 7357 1709 14718 16420 15 714 739 2179 8944 8886 7255 1898 17281 4733 16416 17282 17283
1391 1134 7751 1050 1054 1439 15180 5465 6086 10057 1073 8261 1718 1164 1140 6474 9624 910 2125 1576 1249 17284 15065
1392 5205 1928 1567 4612 1189 1070 4608 2618 1562 1043 4320 5191 3752 1373 3267 4328 9665 5547 13 3490 3286 5465
1393 3167 2017 813 762 2744 2714 1000 656 2637 3421 11924 0 8 3701 1532 2794 649 1718 82 786 4860 1626 10708 769 4996 2791 2779 787 774
1394 1196 6117 1323 12705 1996 1793 5768 17285 8209 7304 10977 6105 15015 9429 9872 1878 1639 17286 17287 15109 1949 17288 17289
1395 1596 8919 5636 1045 2714 1529 1970 17290 14794 10100 912 3273 13422 4178 17291 10593
1396 5668 5488 4904 4305 17292 1685 5673 5504 844 3558 1542 6018 92 811 5051 4917 653 1538 3311 743 768 3304 4590 5271 3506 88 5676 17293 5906 5725 89 17294 5672 17295 5280 13418 7704 6124 12768 79 12534 7806 868 10226
1397 1212 5454 5776 1255 7965 4443 9446 4300 7975 2186 3381 4104 4555 7977 5736 7398 7976 9479 17296 4422 3358 1810 6251 2025 6688 1429 4435 3822 9426 1814 14225 17297 4488 660 2547 6689 1985 5734 8273 4133 4137 1486 1077 1109 13800 2077 13071 8923 5835 5826 11867 1036 5468 3288 1661 9431 1877 3747 1607 17298 2090 2051 17299 7752 2008 2082 4418 10081 17300
1398 2747 821 1534 93 2800 1860 8 2714 2796 776 770 656 0 2778 2179 762 17301 14284 5249 17302 3166 17303 2023
1399 2206 5820 13140 1178 9725 4131 1109 16588 7558 2212 1737 13119 8468 5808 2084 15166 13897 1867 1321 1216 17304 3361 2025 1152 2972 2609 1492 17305 1977
1400 5 13873 1098 10 1042 1078 1957 10904 6164 1761 1090 4026 1859 3753 4015 2222 2686 6230 6567 2682 1901 8191 3751 1103 1383 1597 6177 12279 11337 4488 5637 8244
1401 15376 4884 39 436 16230 12466 10852 61 2986 12450 471 17306 8030 9926 4837 48 457 17074 9598 4834 9969 4828 4806 357 42 5975 181 4883 17307 293 4886 15348 157 17063 315 4885 202 14703 4595 4810 5927 19 33 236 6013 47 17308 5940 4597 12319 5990 4842 2978 121 323 17069 26 9591 114 17309 9509 9920 199 17310 311 5942 17311 440 363 29 17312 5930 17068 259 4826 2983 5919 5939 5957 476 364
1402 3436 15829 9037 9042 17313 9412 624 7835 7855 3302 13423 12812 11696 7841 10121 17314
1403 2684 10657 4168 3267 1932 1442 1598 8222 1110 1068 1170 1099 1570 1059 1103 1114
1404 743 1539 4164 668 2766 710 12 2742 1003 814 6142 4656 4309 2725 6717 3539 5875 3168 3167 703
1405 648 2643 4495 4246 4516 4390 17315 10060 4357 4270 1053 4386 780 2835 2964 12116 4902
1406 4904 5488 5001 4939 2865 6851 5726 4949 12165 6940 4302 6016 3637 768 10378 11061 844 15025 10394 2964 2960 773 6918 17316 692
1407 5952 5974 353 153 4593 5948 4821 15548 4818 9926 39 181 436 114 154 33 12450 2980 417 4834 4841 15545 221 5957 496 233 157 5550 120 4828 357 4837 147 4816 2978 4808 5939 5950 243 4806 5917 15551 17062 15546 15353 15544 169 202 5923 334 386 266 17317 150 17060 432 17318 8030 427 422 240 9596 5915 5943 335 17067 5965 182 164 5933 17319 315 5919 4716 5916 4814 86 61 17070 8025 12436 17320 9597 113 472 17310 5942 5935 5925 5549 4835 4840 111 199 223 5986 9920 14711 2988 277 14696 17321 259 4826 41 17322
1408 17323 17324 17325 14905 11 1716 769 17326 17327 9074 17328 1011 17329 17330 17331 17332 17333 17334 17335 17336 13013 17337 17338 17339 17251 17340
1409 4144 914 2686 1054 5518 14602 1244 6635 4538 6576 6224 4528 13409 7629 11660 17341 7631 9316 15672 17342
1410 17343 17344 17345 4557 3352 17346 17347 17348 9551 1010 17349 17350 17351 7601 17352 17353 17354 17355 17356 17357 17358 17359 17360 17361 13202 17362 17363 17364 17365 17366 17367 13206 17368 17369 17370 17371 17372
1411 5076 1620 14241 3134 4630 7623 1385 5077 7296 17373 1521 1564 5137 1441 4626 2609 10947 17374 17375 4465 15129 8964 6393 4415 1440 7956 14911 13219 1108 4476 1397 1430 6114 3301 4615 3735 4390 5084 11842 17376 1423 4264 8223 1412 8722 17377 7485 6565 9750 9855 15109 17378 6397 14313 17379 17380 10362 898 17381 6613 11844 4620 1109 11097 3137 3704 7885 17382 4622 17383 1240 1432 15075 6381 1030 17384 11918 4655 15097 10673 15288 8747 17385 13058 13700 10873 7092 4373 11946 6189 9661 6215 17386 7122 4107 4385 15709 14695 1334 15642 17387 12360 17388 17389 1604 4612 1388 1404 5376 4640 6550 4357 15289 7986 6428 4175 4177 11009 17390 4614 4639 4527 1156 6401 7897 1568 11917 7989 817 17391 17392 13942 15622 10683 4514 1990 1459 1204 769 3495 743 80 17393 13231 15625 1478 17394 17395 15800 17396 7274 12923 1251 8950 3295 12303 4628 6557 7096 13120 2632 8709 8735 15802 17397 4633 6530 17398 17399 17400 10625 6075 7902 17401 5615 17402 6499 17403 17404 3275 17405 17406 17407 4602 11085 17110 13234 17408 3278 12112 11479 6078 15282 9329 13223 13879 17409 17410 10681 4644 17411 11545 13260 4635 6549 10083 17285 17412 17413 13943 9358 10125 17414 9322 1322 15002 10856 8195 2008 15719 6077 17415 8269 4225 13490 11916 13226 13221 11538 4646 13222 11672 6407 14994 15626 6534 6453 781 17286 17416 6620 6402 17417 4653 16580 17418 7011 12209 3829 17419 8252 8959 4647 17420 4216 4891 17421 6408 1887 4189 4406 3167 7043 17422 6495 4172 15099 4181 9376 10878 4734 17423 17424 6434 17425 11016 6841 15731 7028 9375 10348 1504 11886 17426 7154 8249 17427 1804 9699 3824 5626 6446 1252 4651 17428 6418 10948 10141 17429 10666 9860 17430 6481
1412 12720 17195 7734 1794 14058 17201 5428 1781 10547 962 1766 13983 11297 17192 17199 1767 14002 10724 1352 1353 8452 13157 11262 1796 14492 17431 15855 17432 1351 14548 3111 17433 14133 11932 12804 14257 3123
1413 3129 3645 3429 813 5350 1710 11294 1540 662 2736 2881 685 5800 4724 201 300 2981 17035 12433 9621
1414 749 7556 17313 9030 17434 6299 17435 6342 5886 4064 2651 5900 17436 9039 5880 11697 17259 10263 12653 17437
1415 16795 17438 16079 4557 17439 17440 883 1010 3355 17441 10513 17319 16236 17442 17443 17444
1416 737 4910 4791 3525 3591 2835 3291 5353 4085 8682 1628 2753 8592 2955 17445 12771 3626 5510 3503 5488 3614 11024 3597 9219 708 5273 4301 8672 2797 2012 6961 10434 4577 9217 3573 5012 11637 716 2864 720 6771 12780 12155 3512 11386 3290 4919 4091 17446 3629 10374 3320 3613 3529 17015 3571 3617 7871 3642 2184 10334 5063 3762 92 722 3781 4896 2957 699 10052 3063 8585 5009 2020 704 8603 6029 10379 3650 7312 5489 8014 3647 3657 17447 13272 11355 2903 12888 17448 7712 17449 2730 1853 7963 17450 4657 8613 4928 731 3678 17451 2014 9171 8641 3669 17452 3694 17453 17454 6827 11245 5794 3674 17455 17456 7715 3810 5282 10109 8341 2015 17457 696
1417 17458 17344 17459 17370 15605 17460 17461 17462 17463 17347 13202 17464 17465 17466 15226 17467 17468 17469 17470 13197 17471 17472 17473 10572 17474
1418 1073 4468 14995 4602 9386 4417 13481 5641 1504 6408 4207 6071 1404 17373 17475 17401 1506 6496 8195 11016 17476
1419 4022 8244 7908 15633 17477 8776 14894 17290 9700 8790 17478 11651 2126 9677 17479 17480 17481 1256 8191 4670 4891
1420 4021 1104 8229 6615 7296 11580 17482 17483 6695 4024 8152 2004 9742 1457 2410 7041 4670 17236
1421 17484 15606 17485 17486 9798 17487 17488 17489 17490 17491 17460 17492 17493 17494 17495 17496 17497 17498 17499 17500 17501 15605 17502
1422 8185 1064 1616 1569 5603 8709 1663 1170 780 9698 10675 4035 5636 1808 2932 11023 1128 1624 7016 4015 8959 16447 889 5465 2173 4468 4343 7132 8800 7560 4173 1070 8244 10321 8801 17503 7174 1565 7133 903 10780 12582
1423 2761 764 827 7337 868 4309 1717 824 786 1550 11 1532 5905 94 4862 694 2785
1424 737 10862 3483 7210 674 827 1549 3326 1940 721 3430 8629 814 2767 3760 2717 743 1717 77 94
1425 1054 909 799 1391 7699 1456 7199 6190 914 1097 1422 1111 8785 2281 9521 4451 1045 1090 7450 2686 1654 1439 8803 918 1478 1498 1212 13405 1257 2559 1242 1259 11325 13288 1893 2028 4170 5362 7192 11510 6433 7498 6551 15640 11335 7490 6465 2604 7506 1397 9822 1515 13304
1426 3896 17504 3154 17505 2694 17506 16103 16009 15815 16488 3857 3922 17507 16018 15987 16479 876 17508 3879
1427 6588 9043 9996 5883 6303 9350 3207 5888 10116 9044 9030 3201 17509 17510 3438 9301 9412 5886 6300 15828 13633 12220 12568 17511 12288 17512 9990
1428 6576 4328 9627 1143 10591 1240 17513 1640 1257 12581 1244 9770 11906 1242 13254 13625 1317 6403 5239 15937 12645
1429 1534 1544 1000 2720 2718 827 1549 1716 69 7424 3423 1003 2814 763 1528 710 769 665 1937 11 657 1443 2820 824 2926 654 4314 2012 812 1718 771 12312 813 2763 709 1019 10586 2818 2819 4284 1532 2892 12
1430 10080 1532 4657 4309 10942 3483 678 87 3430 11 2720 824 5188 761 1006 10707 3250 15068 3280 7939 730 12313 5504
1431 1798 1317 1651 1241 1111 1377 4207 1031 4208 1640 1837 1108 1112 4347 2684 1452 4135 1066 1144 8204 1109 7197 2111 1802 8188 1251 2372 4374 1696 1134 8238 13794 1406 7399 7400 7283 4144 12706 2686 17272 7254 8466 1812 5774 17514 1962 17515 1455 2670 5630 1797 3342 11593 9697 17516 2347 5785 1927 9715 10647 8961 8201 2330 7295 1816 1803 1457 3747 10128 9020 659 10657 3218 5005 10790 17517 1492 1969 3379 2245 1701 12002 8471 12043 1145 1893 6223 2207 10772 2045 2209 12142 2185 12404 14795 1646 7253 9459 4 11243 13922 14466 1103 9822 14783 11106 11976 17518 2079 1904 9805 2065 1454 1196 929 8491 11498 3371 1556 2344 2141 13763 9827 15172 2166 2478
1432 1323 12512 5364 15642 17519 6117 2345 6092 4198 7207 17520 17390 8252 7296 4336 3820 1109 4653 17521 896 1329 16582 6391 6408 4365 9011 8787 17419
1433 47 120 9915 181 276 5923 296 169 2986 17522 391 17523 4840 39 5919 5989 17524 14709 5994 269
1434 5536 8796 1422 3824 6085 3828 10861 4334 12209 9380 7784 4602 17385 6452 1200 6214 6215 14238 12303 6665 6194 9846 13260 4171 6075 7623 9375 4633 9228 636 5878 1415 5813 8269 4612 5752 697 4390 17525 7699 11934 1230 9521 4476 17526 13223 10941 17415
1435 2206 5127 1072 5101 6547 2154 2191 1905 1838 2104 1841 5824 1977 10885 7695 5116 16591 17527 1404 17528 3702 6247 2663
1436 1075 9523 1114 4126 1109 11822 7341 5606 4543 2497 1055 4144 10620 5610 17529 2931 1963 1104 10740 1456 5514 11915 5518 9414 5196 1393 13946 1100 1103 13878 4173 799 1143 1253 2104 1321 1998 3365 2037 8785 4207 2686 1465 9028 1250 17530 1244 1498 13721 8803 1487 14969 4435 1489 905 1429 17531 6463 13301 6982 4183 5099 17532 13147 8370 7514 4401 2103 6433 11501 929 1257 11510 1118 2604 5120 15640 4160 17533 1837 1524
1437 1015 1529 770 2815 2736 652 1443 2759 695 8 0 4231 786 1002 654 9086 694 783 3645 2735 2718 3483 5869 82 87 5001 2724 2756 1548 2801 1684 14175 772 6159 5668 785 2796 9221 2134 2108 3 4323 10 6308 2785 6268
1438 4383 5598 17534 1965 2069 5825 1939 10123 12057 2602 4133 2317 4669 1946 11367 2215 2543 2511 17535 5453 17536 3234 12039 17537 13000 1471 3385 2499
1439 2206 6547 8181 1213 2104 4134 1998 2484 12396 1607 13919 5816 2617 5815 12074 11480 13833 4535 2136 2199 1057 2916 7394 11625 15678 12397 1176 2467 8469 7566 2162 1849 2154 9904 11276 7250 5614 10270 17538 2079 14695 1121 2115 10771 1033 8355 1109 11618 1720 13147 2547 5737 7404 11858 2360 17530 5753 1661 12356 2548 2300 1077 2358 1810 10765 2334 5825 8882 1847 17539 13140 1513 2088 2259 7968 1981 6174 7467 17540 1980 4467 2344 2192 17541 3453 11628 2024 1031 4658 13935 10640 5804 5789 1920 929 7514 1439 4137 1053 10772 9415 4524 4102 12068 4160 2317 3335 7752 1944 15014 15347 10634 1805 2388 9756 1654 1189 17299 13817 7519 9026 17542 2491 13892 2320 905 1471
1440 4882 6294 710 3245 2706 2686 2509 17543 10931 14682 1712 924 1256 7263 1058 10605
1441 650 1002 860 2765 16 3701 4709 817 3541 720 2928 7275 5268 7597 2737 771 12 17 2965 17544 3045 852 3593
1442 4019 8787 1939 17545 11664 7899 1661 1246 1617 10947 7471 8768 2008 1884 17546 4137
1443 1696 4027 9712 17547 1075 1153 1876 2916 4557 5590 3355 14232 1103 1165 6230 1633 4483 6994 1590 1170 8810 11575 4020 1192 780 4036 4270 1602 802 5207 1177 7121 7914 1566 660 4022 4283 1143 4035 1043 6702 1896 9767 17244 1063 16410 1224 14302 11676 7105 3714 7084 6236 4539 7102 2686 4626 1246 1800 11616 3707 1049 5218 1555 8152 1138 9704 9738
1444 804 1682 2921 69 6159 2638 7591 2179 769 5072 11006 17548 3245 7545 6319 4007 883 3998 8703 626 14127 3146 1029 17549 5418
1445 4110 3577 12608 5280 10829 4956 9255 13785 17550 6128 5674 7411 17551 17552 13259 6806 17553 9218 17554
1446 2720 654 1628 6628 4586 7412 6156 4295 82 16 1682 657 771 2782 2718 4859 11 2012 1003 15630 3626 84 12 8 2763 1025 2902 715 1015 1004 2706 3596 7425 710 1716 2023 11649 721 696 2835 3647 1016 2014 2784 11006 2775 7130 2786 3245
1447 1084 16947 2082 13719 11080 2203 17555 1593 7273 17556 12704 4371 5776 14975 12303 17413 2089 1972 3265 3452 10636 17557 17558 17559 4535 5485 8747 17560 12928 2329 2077 11518
1448 12453 204 17561 4739 17522 17562 17563 445 5995 4746 269 238 17564 211 49 15036 4599 387 135 4748 9591 17565 157 12447 370 2996 189 17566 95 17567 12841 4811 444 407 3040 446 439 2985 17568 6013 176 8030 16759 10726 17569 8072 17570 12129 16758 17571 17572 17573 9921 9520 17574 12874 10757 17575 17576 17577 17578
1449 17579 17580 17581 17582 15607 17583 17584 17585 17586 17587 17588 17589 17590 17591 17592 17593 17487 15606 17594 17595 17596
1450 1050 3266 11624 1315 11753 4 1086 1065 1569 661 1604 1227 1031 4283 1133 11562 6259 4882 8205 4621
1451 4176 2192 3372 15843 7398 3218 2334 5629 11567 6565 6689 799 1931 8538 13943 10688 4625 2193 15129 9454 1061 6391 17298 6434
1452 4921 3640 8596 2857 9243 670 12862 3422 3639 9545 3077 8674 8410 6729 2731 2894 2829 6901 6963 15893 69 2635 7956 8604 6838 6783 1709 1627 4711 90 6057 5278 5003 3430 13661 6958 11382 3521 5271 16978 8610 4964 725 15 6769 3317 3054 8634 3483 2706 9977 6850 773 9183 17597 3127 8298 10377 6164 10941 6025 6910 5660 2881 7240 1015 14568 17598 14911 3502 3598 8625 12944 6268 9156 786 10402 3688 8592 2835 6724 9198 7590 783 17599 17600 6044 6837 8553 14189 4083 17601 8406 13883 13048 8300 3064 17602 9166 6912 4949 6198 6915 5148 13386 6836 13438 10696 6715 10895 2873 13590 12849 6911 3787 17603 9138 6885 3622 14334 9145 7238 14181 17604 6781 13558 13603 9105 5061 2732 8969 17605 6728 8328 7952 768 2949 13692 8632 3665 11391 2862 10053 4278 857 4494 739 17606 8706 3245 17607 3778 6883 9125 10824 5911 15405 17608 7828 6876 10388 6791 3593 17609 17610 8403 6865 7227 17611 5034 5913 7079 7610 3081 10394 17612 5491 6035 13500 13602 2866 8394 12825 17613 13579 2797 7228 4314 2899 3633 8750 17614 9177 5857 13499 5001 17615 3516 6202 5062 17616 4961 2014 13586 10446 17617 17618 3651 3591 10492 8626 5868 13589 17619 17620 17621 4078 6826 17622 14646 6881 8404 6944 17623 14654 7312 17624 17625 17626 6900 9562 5396 4903 17627 12859 17628 2735 7949 17629 14404 5181 3300 798 9574 2902 6961 9150 17630 17631 12690 14955 4709 17632 2832 17633 17634 17635 13650 17636 3129 17637 14959 17638 17639 17640 13010 6913 17641 17642 17643 9132 2860 17644 17645 15393 709 2926 2963 9277 6030 17646 17647 8417 5351 17648 14426 13570 8683 3574 8753 15399 6278 1542 17649
1453 4873 1623 4035 3285 1078 1566 1555 3267 2933 11 5907 8142 1057 1117 802 780 5477 7908 8268 5211 11281 7886 1084 3425 4546 3275 4539 5191 1080 1617 3722 3839 6576 13476 9709 2677 6990 1115 2333 8248 17650 8382 2165 7906 5612 9720 1194 6984 1043 15146 4322 4434 2680 1633 8152 17651 8088 4771 17652 3823 2685 1399 1062 4030 17653 5910 4021 15158 10255 4488 6306 4485 1971 1420 6308 9704 5548 6164 3732 9754 1455 2393 13470 1954 15794 9738 3371 7000 1253 10904 4420 5465 1244 7019 15900 11566 1161 17654 16423 13135 10877 2199 1558 5535 2932 13217 4428 17226 2678 8779 4489 2313 1036 4486 6701 7002 2700 2090 2686 13693 10778 10784 6942 2410 17655 9747 17256
1454 1066 1144 11100 4182 1441 9720 4488 14602 1457 1240 1056 9754 1420 1498 5479 11628 1257 2384 10096 1478 1473 1893
1455 4301 3496 5155 17 768 1542 4904 4979 8704 685 1446 760 6895 4900 845 810 15
1456 1373 2025 4548 4102 1114 1149 4619 1859 7786 17656 13123 7084 1440 5465 13218 4024 8856 17657 4103 7161 6407 3714 8762
1457 7084 4555 893 1428 5736 1042 1540 1566 17547 5745 7395 4543 1622 13873 7751 2096 1486 3461 1104 577 586 10008 8886 5735 10718 5514 7398 5772 5810 4604 1220 11836 17658 5160 7533 1696 17659 1170 7916 812 670 813 9898 5454 7485 1053 1637 14574 2822 9702 12304 2614 1109 1546 2071 4418 12408 3376 4612 1031 9420 1990 3359 4147 2136 8930 3460 1946 12026 3823 778 10940 5585 4160 6306 7038 7966 11716 2910 4352 3733 2404 13714 4263 1814 1718 4657 2179 4139 12694 9734 7477 11996 17660 15007 9835
1458 1066 1388 1998 2337 1920 5094 1121 5209 5814 76 4482 11258 8180 4880 11331 3059 4427 1837 4183 1458 1804 4465 1322 5257 3430
1459 608 607 589 12184 601 3468 569 6066 839 613 838 1681 10007 572 10017 9963 10280 7529 1271 12091 14712 840 1273 12196
1460 2484 1737 1502 8909 1847 4534 1449 4891 14813 4153 5584 1048 13185 7515 13820 2121 10871 2372 12046 1104 15244 2100 2156 10635 17661 2290 2260 2115 5605 17662 2600 12029 1766 11801 2401 3236 1862 15749 15185 7561 12822 17663 2205 3333
1461 2925 762 4557 17664 3426 4094 3130 1548 4500 2748 652 2781 3356 4586 8531 6057 4981 4864 4657 4330
1462 3083 2731 3639 1006 10866 2964 711 3603 12415 17064 259 17665 2982 17666 8072 376 694 11407 3248 1003 9624 10377 9139 5176 3807
1463 7897 2333 4626 10317 1162 11092 8195 1439 9386 1851 13727 1322 11918 17667 1136 10683 4388 894 11479 13873 11022 1111 2025 1456 1143 10691 17668 15124 8787 7486 10319 1898 1386 6407 1496 11672 14994 10720 6677 1588 1114 3129 11 17669 1948 8537 15626 1661 8770 9769 4636 3741 8772 7621 17670 799 13938 11105 15099 14308 1218 17671 5613 5910 4452 6572 17672 1581 17673 17674 17675 1606 8810 1992 6415 11881 14752 6495 15748 7633 1329 13808 17676 2090 14462 10321 6476 9858 7021 8813 17677 1244 10778 6636 17678 17679 1837 1259 12338 9822 17680 13116 17681 17682 17650 8828 7067 9380
1464 1043 15951 1102 4264 2595 16943 8561 1840 10060 1970 9425 13922 2056 7254 13919 5484 2360 17187 5825 1031
1465 5725 6926 5280 6124 6272 12764 12608 12311 7347 17683 786 9283 11046 4242 14616 5708 17684 11045 17685
1466 2108 4426 7695 1133 1076 1202 3750 5538 2911 1431 17224 5566 17686 3452 12273 661 14976 1438 14629 1917 17687 4179 1805 11479 11565 1176 13833 17688 6841 11097 4479 1395 6166 6680 2469 1071 17689 14245 4443
1467 6071 3268 1473 4410 1971 7888 1411 13897 16743 1245 10251 1448 1330 1457 13299 1499 17690 12646 7188 1318 4257 1404 4111 2161 13124 12717 4334 3379 909 2342 9883 1152 1487 15645 1486 1515
1468 6733 10651 5235 10196 17691 7706 3626 17692 3317 3583 3323 2849 6797 2901 16981 13042 2846 2813 11435 775 8413 17693 10396 4938 5046 17694 17695 8543 7594 7414 6710 17696 6930 2871 6927 17697 5278 17698 5051 4900 17699 9138 3652 11223 3245 5509 10824 9168 17700 10692 5801 17701 5371 17702 6945 17703 10867 14616 17704 7595 6274 3064 10108 11401 17705 11374 15511 3061 8647 9176 6905 13596 15432 14446 11068 4081 17706 12608 6729 10219 14370 17707 9087 9253 6748 6826 4865 17708 17709 17710 9574 17711 17712 17127 9562 10405 15393 3686 13579 17713 12898 17714 3613 14360 8305 5181 8404 17715 9573 8750 17716 9173 8639 17717 8319 17718 17719 3529 13282 16251 2853 17720 12630 5396 17721 3526 847 796 17722 5678 2875 8707 6946 17631 17723 7715 10211 6880 9214 5677 6877 17724 17725
1469 2684 11104 1439 8946 11494 17726 8468 11574 17727 11520 7986 1427 12034 7276 9821 17728 4560 1470 4662 1261 4188 7067 17729 1068 15065 4873 17730 6198 13770 14287 4528 15245 5516
1470 1176 4117 1939 2226 2069 4199 2330 17731 2334 5809 2151 1965 2033 4267 4139 7254
1471 3189 3170 17732 2462 8620 88 96 3782 3865 842 7643 1718 5685 87 11500 676 17733 8572 8566 17734 628 17735 13308 1084 2025 15679 2568 4619
1472 4057 949 8122 4048 4047 3389 7267 3495 721 2892 68 4590 3487 1005 786 9994 6288 5885 12241 7927 3444 17258 636 6380 17736 4772 16964 17737 16002 16689 16280 15203 9527 14878
1473 2911 2011 1051 4443 4131 5826 4136 2036 4117 1100 5736 1471 7791 2972 1965 1064 4377 1615 4334 4125 1459 1255 3715 1043 1939 1928 2226 4142 781 4544 1044 1060 7195 4200 3048 1455 7751 8176 4106 9757
1474 668 4927 7446 17738 2641 77 3767 2835 3526 2012 10331 11075 17739 17740 3699 6060 10464 3312 17741 5868 14502 9553 5025 12943 11397 17742 14346 10508 9986 10241 12017 12896 13025 17743 5054 16623 722 3777 17744 7883 2957 12331 9558 8343 17745 17746
1475 17747 8875 17103 17097 17748 17749 17750 13390 12788 16938 17751 17752 17753 17754 17755 1010 17756 17757 17758 17759 17760
1476 17761 17762 17763 17764 17765 17766 17767 17768 16955 17769 17770 16795 16165 17771 17772 13433 17773 17774 17775 17776 17777 17778 17779 17780 17781 3958 17782 17783 17784 17785 4715 17786 17787 16940 7363 17788 4012 17789 17790 16105 17791 17792 17793 17794 17795 17796 17797 17798 17799 16214 17800 17801 17802 17803 17804 5332 17805 17806 17807 17808 17809 17810 17811 17812 17813 4011 17814 17815 17816 17817 17818 3934 17819 17820 3904 17821 17822 17823 17824 17825 17826 17827
1477 2734 17828 17829 3982 17830 17831 9611 3166 17832 17833 17834 3856 16553 17835 17836 17325 10733
1478 8 650 16 11295 721 4711 737 2835 5496 7873 7573 826 3063 7878 693 8148 860 670 676 4865 14663 11154 6338 8572 4685 13 755 11132 3447 6364 11186 17837 17838 786 6933 11648 1540 2762 762 15948 6158 2814 4278 769 2760 684 5072 2787 649 1004 2744 715
1479 1155 8138 1176 2125 1429 1053 6103 3716 3359 2902 773 2014 8726 16391 918 710 10586 10414 843 1879 2106 657 13288 2842
1480 17839 15867 1368 7731 10702 1753 1750 1763 1305 10531 631 1725 1724 6318 1736 1752 1352 17840
1481 14296 1010 17841 17842 17843 17844 17845 17335 16062 17846 17847 17848 7601 17849 17850 17851 17852 17339 17853 17854 17855 17098
1482 5228 1068 1391 1399 9785 4476 5582 4441 11580 2410 2037 1837 1130 5628 8142 10685 1114 17856 4035 6 3753 5 1253 4415 7623 4 4892 2682 1324 4263 8229 4435 5223 1143 7187
1483 3518 5001 5054 7947 8672 3684 7147 13769 17857 652 811 2796 4162 17858 5845 11396 13274 17859 3670 17860 13052 2866 17861 13677 9366 17862 5271 12990 17863 17864 3321 14371
1484 1716 93 1001 0 669 11 649 868 81 721 82 1532 1718 824 92 17865 17866 16886 17867 17868 16782 4766 16060
1485 2835 682 2874 11034 783 711 2798 4164 762 1018 3784 1540 2942 12 790 694 1541 2782 8436 715
1486 3702 8224 4144 93 1696 4548 780 2686 781 1175 4876 8374 1245 7804 1427 1145 9751 928 2623 9061 924 4372 6413 9857 7299 1104 9768 15749 11501 4388
1487 4674 5163 594 17869 9939 12188 10279 4698 4673 566 836 5292 10023 7529 4848 575 10012 991 557 4851 1672 10007 4681 602 990 4676 10288 834 12181 6640 10028 989 574 5161 4855 619 606 598 12585 841 12971 570 568 9946 10296 17106 10908 12972 8060 17870 8049 555 1671 608 17871 17872 2919 10016 12193 17873 10039 5304 10010 17874 621 1266 17132 3471 17875
1488 13493 17876 16003 12786 871 17877 7385 17878 17879 17880 14284 16996 16726 17881 9640 7358 13529 17882 16797 3149 9637 3154 17883 16103 16653 11802 17884 4772 862 15987 16654 17885 11114 16340 17886 3856 10733 3928 17887 17888 17833 16280 16282 9609 2694 870 16649 3191 17889 4785 2690 877 17890 3890 17891 3153 17892 3893 15847 16635 3316 16826 16657 7371 15614 14285 16827 16660 7382 3161 16767 16303 878 15980 17893 17894 12784 16860 17895 17896 8877 7384 16661 16236 17897 16091 15986 7726 874 17898 16835 16957 770 7597 2782 11 1716 3423 2709 2796 2902 2744 710 2814 2737 81 17899 17900 17901 17902 17903
1489 12062 9145 843 17904 3626 5801 90 4865 4924 4280 2014 11379 3631 9100 1540 768 7313 3679 4078 8598 6725 2895 7719 8390 2883
1490 16776 3432 16262 3865 3918 14877 16875 16544 13524 17905 882 16800 872 17906 16729 13528 14526 880 17907 4766 16550 17908 17909 16515 17910 17911 9640 3174
1491 10215 981 17912 845 663 3291 3284 9368 7890 6895 2714 3629 5354 710 2014 3770 657 12776 11397 5021 3495 4939 82 1018 826 3817 69 3760 2179 1015 13446 14391 842 5328 3787 8342 821 3647 8329 10208 4990 3600 743 7442 2844 6385 14196 11034 773 17913 16623 795 8633 9579 5395 15 8692 9574 3248 12782 17914 16447 10316 93 17915 9558 12783 5323 693 5024 17916 3083 11651 7239 6926 10469 17917 673 10429 768 17918 14423 17919 15455 6940 8752 1709 10462 3309 3788 8415 13036 15393 89 16226 3051 17920 17921 5381 14223 17922 12984 1543 12331 3667 5373 6268 5012
1492 5643 11549 17923 1134 11021 17924 3136 8808 4218 15894 17925 4641 17926 1460 6185 811 17927 5134 17928 17929 6168 4485 1507 6565 11845 9845 10857 1518 4450 7195 1327 1396 8223 12208 4935 3516
1493 17365 17356 17930 17931 17932 17587 17933 17934 13197 17935 17936 17487 17937 17938 17939 17940 17941 17942 17943 17944 17945 17946 15227 17947 17948 17949 3169 17950 17359 17951 17952 17953 17954 15232 13203 17955 17956 17957 17958 17959 17461 17960 15229 7259 17591 17961 17588 17962 12781 17963 17349 17964 17469 17965 17966 17471 17967 17594
1494 3 5517 1072 5520 2206 1226 5620 2677 6164 1448 6236 1090 1426 1063 1616 2678 1661 9710 2037 4471 4395 6209 5606 5531 12409 1242 1060 4018 8946 2684 5212 2910
1495 4860 16 980 698 2726 1941 1716 17968 17969 883 17970 1826 93 2902 2737 15 2757 777 3277 868 826 4164 7830 4500 3647 5861 693 5488 842 14160 10407 17971 4791 80 7597 9153 774 2782 773 4304 17972 852 715 8667 17861 766
1496 670 3483 5869 2965 87 7597 5343 4697 8139 586 1675 300 9621 13 34 6154
1497 17878 878 17973 11449 16079 16804 17974 17975 16951 17976 16123 17977 17978 12785 13089 16565 16796 13522 17979 16763 7361 16858 17897 880 17980
1498 7661 5163 9485 986 7531 15164 3464 17981 17982 621 4671 12206 12093 580 9946 7522
1499 106 4815 17983 17060 17984 17036 12467 17985 14509 5971 17986 3032 9608 17987 3027 355 12020 17988 17989 495 150 17990 11412 17067 17991 17992 17993 17086
1500 17994 10681 17995 17996 12359 5910 8227 4893 4357 4608 4197 8176 6613 8185 1323 10945 5753 4179 4450 4376 8226 2686 17997 1245 4158 904 1404
1501 15779 6282 2645 5901 17998 2651 8165 4069 2655 2649 17999 9045 18000 6589 2647 3200 9031 3433 8162 9301 9033 4064 5796 87 3430 3525 9044 770 9037 3483 12215 16395 3206
1502 816 4330 1532 1682 4111 2713 13139 10346 10847 6119 1535 6109 2022 3244 3546 84 4585
1503 9386 4224 3728 4628 1108 7751 12306 3373 1441 6215 6586 1420 1327 12209 2163 1130 3275 1068 14239 4626 18001 18002 18003
1504 12640 10371 7215 3609 855 3525 6124 4900 811 5372 10866 10798 4939 11389 9365 3503 5342 7811
1505 96 1716 2964 665 2781 763 704 737 824 11 649 1003 4705 7981 3492 2819 1532 769
1506 2720 90 3508 10380 1203 3339 4555 9389 3569 7907 4552 6447 14481 12929 4228 1137
1507 6389 4443 2162 929 1057 1143 4112 1068 14839 7975 5789 10620 7296 9447 3343 2367 14528 18004 18005 5471 1119 9654 7398 4556 1108 7373 7976 1810 2281 16764 2693 9639 2025 1069 15958 11347 2389 1109 2039 16703 1901 2699 2685 762 14754 4488 15952 18006 16807 18007 8895 1473 2851 783 721 2643 6694 1176 2925 9431 0 2713 827 2638 4585 12996 1373 11449 4524 1985 12353 15014 2110 7302 11839 1981 2292 5094 5810 5776 1695 1647 1330 1887 4300
1508 4780 18008 16286 18009 16719 15974 16888 17508 13519 16832 18010 16835 18011 18012 18013 7371 18014 18015 16735 16601
1509 5516 11238 6069 4655 10683 18016 3451 1049 12009 1454 1031 3136 1329 12513 1696 11979 4160 8950 2737 1440 9744 13947 15578 5525 1090 6211 87 1104 6575 1404 5364 4270 8274 15334 3702
1510 5265 2972 1076 929 2667 14460 2259 1060 909 1882 2193 7197 6096 6215 7341 1839 6093 2320 1828 1837
1511 1391 5567 3703 13725 8191 1518 14883 4158 1472 1651 1992 8763 8386 1069 7167 8769 8777 12143 17393
1512 3600 1541 2930 654 999 824 710 2742 765 650 845 721 2775 657 2012 2940
1513 1536 5186 2775 1540 648 2814 1541 4995 1546 2798 711 762 2835 2874 2959 2709 3649
1514 663 6057 652 17639 3253 5869 15140 785 2803 7573 819 795 18017 18018 18019 16386 9013 4709 5153 1534 6287 624 15009 5885 2651 18020
1515 7802 1322 1104 1143 1637 1166 1040 1092 1384 1378 1053 6693 1112 3131 11502 1089 1056 6606 4876 1721 15715 4472 9813 15011 1393
1516 1399 660 13636 1420 2682 2685 9020 1540 746 4160 6170 9747 2932 6663 9733 2134 1130 1073 5826 1244 1031 3371 10058 15291 1556 1057 7191 5752 1036 10591 10095 7201 15149 16425 13290 6188 9708 1637 6176 3212 18021 1146 1253 1056 10059 1114 4572 1143 10951 14459 18022 2463 15732 18003 17529 4338 1120 9716 9819 1317 5581 13128 3379 1259 4144 891 13901 1090
1517 1053 6350 5778 10972 1243 9047 2037 1090 10636 4338 1052 1034 1031 10941 9306 11138 14236 3206 13641 7927 9038 9350 6288 5885 11169 3439 17261 12239 8090 4122 1330 4385 6243 1245 1459 18023 2646 18024 9307 12232 17263 13634 3273 7121 2683 2700 18025 6370 18026 4685 11128 18027 664 3444 18028 6332 18029 15772 18030 18031 6281 11340 18032 7859 15828 12291 18033 6335 7858 279 8070 6593 18034 17268 6305 5902 12213 18035 12814 18036 7851 8100 11188 7845
1518 18037 18038 16671 882 16507 14877 864 16061 11450 16013 16472 16336 18039 16267 16494 16854 10570 16652 18040 3432 16501 16111 18041 3926 16563 16902
1519 748 3206 13336 1446 18042 2878 700 18043 657 8517 18044 18045 15304 8803 18046 8734 18047 11978 18048
1520 5350 5753 3294 1865 3359 1048 3260 1109 11567 8961 1639 13832 18049 12073 18050 7966 10669 11853 1962 12034 1803 1870 1810 9479 9465 12304 2224 18051 2174 2193 18052 6465 2279 2435 1039 7520 11351 2077 2262 18053 1031 12151 2352 1114
1521 12512 6106 925 6104 4179 6453 4128 10349 6685 9004 8209 6440 4454 4183 1250 10623 3704 2231 7821 9006 12127 6249 12265 16923 18054
1522 816 2942 2902 3245 2782 2897 2737 774 2867 15 8669 790 7262 722 3248 1541 2796 2939 3259 2781 3074 5012 852 6732
1523 6706 17864 2825 13541 3585 855 6826 3499 5045 5506 6912 10217 7701 3072 3625 3517 15555 2847 13583 3762 4979 3305 8288 4331 8314 2603 2737 8653 14856 11060 5054 7747 3557 7573 8405 18055 18056 4957 17640 10411 5849 2015 4079 7279 6063 18057 3788 12119 667 11729 17743 8667 716 18058 4236 5844
1524 1269 18059 10032 10020 9483 598 18060 14513 1271 10280 9935 6640 10040 8004 4699 617 6637
1525 1644 1941 1108 16582 11085 9795 10096 1899 922 10591 1397 16377 4078 3683 6142 4654 11662 18061 3483 5361 18062 8436 5022 1818 2414 13304 18063 14418 9266
1526 5678 3608 9112 5510 3626 11554 3503 2887 737 5677 716 4110 2020 7871 6029 5012 8544 4917 18064 14907 8089 766 12155 8958 3525 12885 7712 704 10816 4381 2012 10807 4165 18065 999 6844 12538 10998 1941 4307 14393 18066 3794 12821 740 3640 6846 6153 6800 11245 8755 9119 8607 18067 2897 6954 7832 18068 3639 15705 18069 3537 5068 18070 3493 9256 18071 7864 710 15805 6036 2895 6940 14221 15697 18072 3683 11726 774 3784 3792 702 3584 6016 3790 18073 14568 2014 14218 14201 3660 9241 773 4939 3649 3656 3761 17600 7956 18074 18075 3770 14911 18076 8600 3647
1527 5367 18077 12414 4805 139 17038 9516 8073 9969 18078 503 9509 18079 12663 12464 113
1528 1078 1149 1134 1431 1143 5134 4323 2320 1470 4405 1393 2916 6071 7273 7889 1104 1604
1529 4125 1056 5199 1109 3750 5207 3715 5080 6957 1206 780 7619 11686 4146 1129 1928 8265 1036 18080
1530 3398 947 932 3391 3407 938 3409 12302 3410 7269 3399 931 3401 3388 12301 7212 3412
[truncated: 6,506,735 more chars]
